# Supplementary material for: All-optical closed-loop voltage clamp for precise control of muscles and neurons in live animals
Source: Research Square preprint supplement (doi:10.21203/rs.3.rs-1505565/v1), 2023-03-29
Supplement: Supplementary file 2 [file 235ae6107c8c1f1c8c52f4a7.xlsx]

## Sheet: 2 A
	Fluorescence		Patch-clamp
Time	DF/F0 (bleaching-corrected)	Time	Membrane potential
0.0109	1.15	0	-25.5312
0.0218	0.65	0.0005	-25.2812
0.0327	-0.27	0.001	-25.3438
0.0436	-0.35	0.0015	-25.6562
0.0545	-0.28	0.002	-25.6562
0.0654	0.01	0.0025	-25.6875
0.0763	-0.1	0.003	-25.5938
0.0872	-0.51	0.0035	-25.7188
0.0981	-0.31	0.004	-25.875
0.109	-0.26	0.0045	-25.75
0.1199	-0.32	0.005	-25.7188
0.1308	-0.22	0.0055	-25.7188
0.1417	-0.21	0.006	-25.7812
0.1526	-0.55	0.0065	-25.8438
0.1635	-0.58	0.007	-25.8125
0.1744	-1.02	0.0075	-25.75
0.1853	-0.28	0.008	-25.75
0.1962	0.17	0.0085	-25.8438
0.2071	-0.03	0.009	-25.9062
0.218	-0.15	0.0095	-25.5938
0.2288	-0.31	0.01	-25.5312
0.2397	-0.37	0.0105	-25.625
0.2506	-0.03	0.011	-25.5
0.2615	-0.54	0.0115	-25.5312
0.2724	-0.39	0.012	-25.7188
0.2833	-0.59	0.0125	-25.5312
0.2942	0.18	0.013	-25.8125
0.3051	-0.71	0.0135	-25.75
0.316	-0.46	0.014	-25.8438
0.3269	-0.09	0.0145	-25.5938
0.3378	-0.01	0.015	-25.625
0.3487	-0.39	0.0155	-25.7812
0.3596	-0.47	0.016	-25.6562
0.3705	0.47	0.0165	-25.6875
0.3814	0	0.017	-25.4688
0.3923	-0.22	0.0175	-25.4062
0.4032	-0.26	0.018	-25.1562
0.4141	-0.37	0.0185	-24.9688
0.425	0.14	0.019	-24.9688
0.4359	-0.48	0.0195	-25.0312
0.4468	-0.53	0.02	-24.9375
0.4577	0.09	0.0205	-25
0.4686	0.39	0.021	-24.9062
0.4795	-0.09	0.0215	-24.9688
0.4904	-0.58	0.022	-25.0312
0.5013	0.06	0.0225	-25.0625
0.5122	-0.49	0.023	-25.125
0.5231	0.03	0.0235	-25.0938
0.534	0.24	0.024	-24.875
0.5449	0.09	0.0245	-24.9688
0.5558	-0.26	0.025	-24.8125
0.5667	-0.06	0.0255	-24.875
0.5776	-0.14	0.026	-24.7188
0.5885	-0.28	0.0265	-24.9375
0.5994	0.05	0.027	-25
0.6103	0.15	0.0275	-24.9375
0.6212	0.04	0.028	-25
0.6321	0.04	0.0285	-24.8438
0.643	-0.04	0.029	-25.0625
0.6539	0.14	0.0295	-24.6562
0.6648	-0.12	0.03	-24.75
0.6757	-0.2	0.0305	-24.9375
0.6866	0.52	0.031	-24.875
0.6974	0.09	0.0315	-24.9688
0.7083	-0.08	0.032	-25.0312
0.7192	-0.51	0.0325	-24.9688
0.7301	0.35	0.033	-25
0.741	0.06	0.0335	-25.0312
0.7519	-0.02	0.034	-25.0938
0.7628	0.37	0.0345	-25.0312
0.7737	-0.62	0.035	-24.9688
0.7846	-0.06	0.0355	-25.0312
0.7955	0.28	0.036	-24.875
0.8064	0.4	0.0365	-24.9062
0.8173	0.29	0.037	-24.8438
0.8282	0.2	0.0375	-24.8438
0.8391	0.12	0.038	-24.875
0.85	-0.02	0.0385	-24.875
0.8609	-0.31	0.039	-24.875
0.8718	-0.05	0.0395	-25.0938
0.8827	0.34	0.04	-24.9375
0.8936	0.49	0.0405	-25.0938
0.9045	0.29	0.041	-25.125
0.9154	0.12	0.0415	-25.1875
0.9263	0.12	0.042	-25.125
0.9372	0.47	0.0425	-25.2812
0.9481	0.09	0.043	-25.2188
0.959	0.55	0.0435	-25.375
0.9699	0.19	0.044	-25.4062
0.9808	0.17	0.0445	-25.375
0.9917	0.24	0.045	-25.5
1.0026	0.84	0.0455	-25.5625
1.0135	0.04	0.046	-25.5312
1.0244	-0.14	0.0465	-25.5312
1.0353	0.49	0.047	-25.7188
1.0462	0.44	0.0475	-25.5625
1.0571	0.41	0.048	-25.6562
1.068	0.56	0.0485	-25.8125
1.0789	-0.15	0.049	-25.8438
1.0898	0.55	0.0495	-25.5938
1.1007	0.19	0.05	-25.7188
1.1116	0.13	0.0505	-25.7812
1.1225	0.48	0.051	-25.75
1.1334	0.57	0.0515	-25.8438
1.1443	0.42	0.052	-25.8125
1.1551	0.16	0.0525	-25.9375
1.166	0.5	0.053	-25.9062
1.1769	0.57	0.0535	-26.0938
1.1878	0.38	0.054	-25.875
1.1987	0.39	0.0545	-25.8125
1.2096	0.31	0.055	-26.0312
1.2205	0.44	0.0555	-25.8438
1.2314	0.55	0.056	-25.8125
1.2423	0.55	0.0565	-25.9062
1.2532	0.14	0.057	-26.0625
1.2641	-0.14	0.0575	-25.9062
1.275	0.47	0.058	-26.0625
1.2859	0.3	0.0585	-26.0625
1.2968	0.11	0.059	-26.0938
1.3077	0.35	0.0595	-26.1875
1.3186	0.46	0.06	-26.1875
1.3295	0.38	0.0605	-26.1875
1.3404	0.55	0.061	-26.125
1.3513	0.09	0.0615	-26.125
1.3622	0.25	0.062	-26.4062
1.3731	0.12	0.0625	-26.1875
1.384	-0.37	0.063	-26.375
1.3949	0.14	0.0635	-26.4062
1.4058	0.53	0.064	-26.5
1.4167	0.1	0.0645	-26.4688
1.4276	0.3	0.065	-26.4375
1.4385	-0.32	0.0655	-26.625
1.4494	0.26	0.066	-26.4062
1.4603	0.86	0.0665	-26.5312
1.4712	0.22	0.067	-26.5938
1.4821	-0.15	0.0675	-26.5
1.493	0.16	0.068	-26.8438
1.5039	-0.11	0.0685	-26.75
1.5148	-0.05	0.069	-26.75
1.5257	0.35	0.0695	-26.4688
1.5366	0.1	0.07	-26.7188
1.5475	0.18	0.0705	-26.8438
1.5584	-0.07	0.071	-26.7188
1.5693	0.2	0.0715	-26.75
1.5802	0.16	0.072	-26.8125
1.5911	-0.05	0.0725	-26.625
1.602	0.59	0.073	-26.9375
1.6128	0.02	0.0735	-27.125
1.6237	-0.03	0.074	-26.9375
1.6346	0.5	0.0745	-26.8125
1.6455	0.08	0.075	-27.1562
1.6564	0.15	0.0755	-27.0938
1.6673	0.38	0.076	-27.1875
1.6782	0.48	0.0765	-27.1562
1.6891	-0.16	0.077	-27.0938
1.7	0.23	0.0775	-27.0938
1.7109	0.31	0.078	-27.2812
1.7218	0.32	0.0785	-27.25
1.7327	-0.03	0.079	-27.1875
1.7436	0.2	0.0795	-27.375
1.7545	0.3	0.08	-27.25
1.7654	0.41	0.0805	-27.375
1.7763	0.23	0.081	-27.1562
1.7872	0.3	0.0815	-27.375
1.7981	0.31	0.082	-27.25
1.809	0.26	0.0825	-27.2188
1.8199	0.42	0.083	-27.5
1.8308	1.01	0.0835	-27.3125
1.8417	1.71	0.084	-27.2812
1.8526	1.69	0.0845	-27.4375
1.8635	1.94	0.085	-27.4375
1.8744	2.52	0.0855	-27.4688
1.8853	1.98	0.086	-27.375
1.8962	2.09	0.0865	-27.4375
1.9071	1.71	0.087	-27.5
1.918	1.66	0.0875	-27.6562
1.9289	1.75	0.088	-27.5938
1.9398	1.71	0.0885	-27.625
1.9507	1.26	0.089	-27.875
1.9616	1.58	0.0895	-27.5938
1.9725	1.61	0.09	-27.6875
1.9834	0.9	0.0905	-27.6875
1.9943	0.29	0.091	-27.6875
2.0052	-0.32	0.0915	-27.5938
2.0161	-0.3	0.092	-27.625
2.027	-0.53	0.0925	-27.7812
2.0379	-0.59	0.093	-27.6562
2.0488	-0.2	0.0935	-27.7188
2.0596	-0.56	0.094	-27.6562
2.0705	-0.67	0.0945	-27.6562
2.0814	-0.9	0.095	-27.625
2.0923	-0.76	0.0955	-27.7188
2.1032	-0.91	0.096	-27.4688
2.1141	-0.85	0.0965	-27.4688
2.125	-0.68	0.097	-27.5938
2.1359	-1.03	0.0975	-27.5625
2.1468	-1.14	0.098	-27.5
2.1577	-0.75	0.0985	-27.5938
2.1686	-0.65	0.099	-27.4375
2.1795	-0.81	0.0995	-27.6875
2.1904	-1.04	0.1	-27.625
2.2013	-0.72	0.1005	-27.4688
2.2122	-0.58	0.101	-27.375
2.2231	-0.88	0.1015	-27.5625
2.234	-1.02	0.102	-27.2812
2.2449	-0.85	0.1025	-27.5
2.2558	-0.82	0.103	-27.5938
2.2667	-1.1	0.1035	-27.4688
2.2776	-0.82	0.104	-27.3125
2.2885	-0.66	0.1045	-27.5
2.2994	-0.87	0.105	-27.375
2.3103	-0.38	0.1055	-27.2812
2.3212	-0.86	0.106	-27.375
2.3321	-0.61	0.1065	-27.25
2.343	-0.32	0.107	-27.4375
2.3539	-0.7	0.1075	-27.25
2.3648	-0.9	0.108	-27.25
2.3757	-1.45	0.1085	-27.375
2.3866	-0.39	0.109	-27.5
2.3975	-0.16	0.1095	-27.25
2.4084	-0.76	0.11	-27.5
2.4193	-0.84	0.1105	-27.5938
2.4302	-0.29	0.111	-27.4688
2.4411	-0.23	0.1115	-27.375
2.452	-0.42	0.112	-27.4688
2.4629	-0.2	0.1125	-27.3438
2.4738	-0.17	0.113	-27.3125
2.4847	-0.6	0.1135	-27.3438
2.4956	0.05	0.114	-27.3125
2.5065	-0.5	0.1145	-27.4688
2.5174	-0.41	0.115	-27.5625
2.5282	-0.2	0.1155	-27.5312
2.5391	-0.1	0.116	-27.4688
2.55	-0.36	0.1165	-27.3125
2.5609	-0.13	0.117	-27.4688
2.5718	-0.46	0.1175	-27.3438
2.5827	-0.08	0.118	-27.2188
2.5936	-0.58	0.1185	-27.3438
2.6045	-0.06	0.119	-27.4375
2.6154	0.08	0.1195	-27.3125
2.6263	-0.25	0.12	-27.2812
2.6372	-0.14	0.1205	-27.2812
2.6481	-0.03	0.121	-27.1562
2.659	-0.1	0.1215	-27.25
2.6699	-0.12	0.122	-27.125
2.6808	-0.06	0.1225	-27.125
2.6917	-0.46	0.123	-27.0938
2.7026	-0.67	0.1235	-27.2188
2.7135	-0.19	0.124	-27.0938
2.7244	0.03	0.1245	-26.9062
2.7353	-0.24	0.125	-26.8438
2.7462	0.16	0.1255	-27.0312
2.7571	-0.09	0.126	-26.875
2.768	0.18	0.1265	-26.8125
2.7789	-0.09	0.127	-26.7188
2.7898	0.16	0.1275	-26.5938
2.8007	-0.09	0.128	-26.8125
2.8116	-0.2	0.1285	-26.5938
2.8225	0.05	0.129	-26.8125
2.8334	-0.12	0.1295	-26.625
2.8443	-0.19	0.13	-26.75
2.8552	0.47	0.1305	-26.75
2.8661	0.18	0.131	-26.8438
2.877	-0.21	0.1315	-26.875
2.8879	-0.14	0.132	-26.7812
2.8988	-0.07	0.1325	-26.9062
2.9097	0.03	0.133	-26.7812
2.9206	0.04	0.1335	-26.8438
2.9315	0.11	0.134	-26.875
2.9424	-0.33	0.1345	-26.9062
2.9533	0.05	0.135	-26.8125
2.9642	0.07	0.1355	-26.8438
2.975	-0.26	0.136	-26.7812
2.9859	-0.41	0.1365	-26.7812
2.9968	-0.16	0.137	-26.75
3.0077	-0.17	0.1375	-26.7188
3.0186	0.11	0.138	-26.8125
3.0295	-0.22	0.1385	-26.8438
3.0404	0.31	0.139	-26.7812
3.0513	-0.06	0.1395	-26.9062
3.0622	-0.03	0.14	-26.9062
3.0731	-0.04	0.1405	-27.0938
3.084	-0.04	0.141	-26.9375
3.0949	0.11	0.1415	-26.875
3.1058	-0.34	0.142	-26.9375
3.1167	-0.09	0.1425	-27
3.1276	0.19	0.143	-26.9688
3.1385	0	0.1435	-27.1875
3.1494	0.39	0.144	-27.0625
3.1603	-0.09	0.1445	-27.1562
3.1712	0.05	0.145	-27.1562
3.1821	-0.22	0.1455	-27.1562
3.193	0.37	0.146	-27.25
3.2039	0.23	0.1465	-27.1562
3.2148	0.02	0.147	-27
3.2257	-0.02	0.1475	-27.125
3.2366	0.22	0.148	-27.25
3.2475	0	0.1485	-27.0938
3.2584	0.18	0.149	-27.125
3.2693	0.12	0.1495	-27.0625
3.2802	-0.48	0.15	-27.1562
3.2911	0.03	0.1505	-27.2188
3.302	0.45	0.151	-26.9062
3.3129	0.07	0.1515	-27
3.3238	-0.34	0.152	-26.9375
3.3347	-0.41	0.1525	-27.125
3.3456	-0.21	0.153	-26.9375
3.3565	-0.13	0.1535	-27.2188
3.3674	-0.23	0.154	-27.2812
3.3783	0.08	0.1545	-27.2188
3.3892	-0.33	0.155	-27.0938
3.4001	-0.49	0.1555	-27.2812
3.411	-0.21	0.156	-27.1875
3.4219	-0.12	0.1565	-27.1562
3.4328	-0.36	0.157	-27.125
3.4436	0.18	0.1575	-27.1562
3.4545	-0.05	0.158	-27.1875
3.4654	-0.23	0.1585	-27.2812
3.4763	-0.48	0.159	-27.1875
3.4872	-0.31	0.1595	-27.4375
3.4981	0.02	0.16	-27.375
3.509	-0.6	0.1605	-27.4688
3.5199	-0.58	0.161	-27.2812
3.5308	0.11	0.1615	-27.3125
3.5417	-0.07	0.162	-27.5
3.5526	0.6	0.1625	-27.4375
3.5635	-0.07	0.163	-27.4688
3.5744	0.27	0.1635	-27.5312
3.5853	0.19	0.164	-27.4375
3.5962	0.2	0.1645	-27.5938
3.6071	-0.11	0.165	-27.4375
3.618	-0.07	0.1655	-27.5
3.6289	-0.36	0.166	-27.625
3.6398	0.12	0.1665	-27.6562
3.6507	-0.47	0.167	-27.5
3.6616	-0.22	0.1675	-27.375
3.6725	0.26	0.168	-27.4688
3.6834	-0.42	0.1685	-27.4375
3.6943	-0.07	0.169	-27.3438
3.7052	-0.19	0.1695	-27.1562
3.7161	-0.03	0.17	-26.9688
3.727	0.39	0.1705	-27.0625
3.7379	-0.34	0.171	-27.0312
3.7488	0.14	0.1715	-26.9062
3.7597	-0.21	0.172	-27.0312
3.7706	-0.1	0.1725	-27.125
3.7815	0.31	0.173	-26.9688
3.7924	0.07	0.1735	-26.875
3.8033	1.08	0.174	-27
3.8142	0.28	0.1745	-26.9062
3.8251	0.54	0.175	-26.8438
3.836	0.12	0.1755	-26.8438
3.8469	-0.08	0.176	-26.8438
3.8578	0.35	0.1765	-26.6562
3.8687	-0.08	0.177	-26.8438
3.8796	0.25	0.1775	-26.75
3.8904	0.22	0.178	-26.8438
3.9013	-0.46	0.1785	-26.9375
3.9122	0.02	0.179	-26.875
3.9231	0.46	0.1795	-26.875
3.934	-0.19	0.18	-26.4375
3.9449	-0.21	0.1805	-26.5
3.9558	-0.06	0.181	-26.625
3.9667	0.06	0.1815	-26.5312
3.9776	0	0.182	-26.4062
3.9885	0	0.1825	-26.3125
3.9994	0.26	0.183	-26.5
4.0103	0.06	0.1835	-26.4375
4.0212	-0.32	0.184	-26.3438
4.0321	-0.13	0.1845	-26.4375
4.043	-0.01	0.185	-26.3438
4.0539	-0.03	0.1855	-26.25
4.0648	-0.16	0.186	-26.25
4.0757	-0.06	0.1865	-26.375
4.0866	0.48	0.187	-26.1562
4.0975	0.01	0.1875	-26.3125
4.1084	0.18	0.188	-26.25
4.1193	-0.21	0.1885	-26.25
4.1302	-0.21	0.189	-26.3438
4.1411	0.35	0.1895	-26.1562
4.152	0.27	0.19	-26.2188
4.1629	0.14	0.1905	-26.1875
4.1738	0.39	0.191	-26.3125
4.1847	0.04	0.1915	-26.2188
4.1956	0.05	0.192	-26.1875
4.2065	0.42	0.1925	-26.3125
4.2174	0.14	0.193	-26.2188
4.2283	0.4	0.1935	-26.2812
4.2392	-0.32	0.194	-26.25
4.2501	-0.02	0.1945	-26.25
4.261	-0.07	0.195	-26.2188
4.2719	0.36	0.1955	-26.3125
4.2828	0.34	0.196	-26.0625
4.2937	0.35	0.1965	-26.25
4.3046	0.57	0.197	-26.2812
4.3155	-0.21	0.1975	-26.1875
4.3264	0.1	0.198	-26.25
4.3373	0.09	0.1985	-26.0938
4.3482	0.31	0.199	-26.25
4.359	-0.02	0.1995	-26.3125
4.3699	-0.06	0.2	-26.1875
4.3808	0.17	0.2005	-26.1562
4.3917	0.25	0.201	-26.0938
4.4026	0.9	0.2015	-25.9375
4.4135	-0.05	0.202	-26.1562
4.4244	-0.25	0.2025	-26.1562
4.4353	0.1	0.203	-26.1562
4.4462	-0.06	0.2035	-26.0938
4.4571	-0.25	0.204	-26.125
4.468	-0.17	0.2045	-26.2188
4.4789	0.02	0.205	-26.2188
4.4898	0.02	0.2055	-26.2812
4.5007	0.31	0.206	-26.1562
4.5116	0.18	0.2065	-26.25
4.5225	-0.15	0.207	-26.3438
4.5334	0.39	0.2075	-26.125
4.5443	-0.18	0.208	-26.3438
4.5552	0.33	0.2085	-26.1562
4.5661	-0.34	0.209	-26.25
4.577	0.12	0.2095	-26.25
4.5879	0.09	0.21	-26.3125
4.5988	0.49	0.2105	-26.3125
4.6097	-0.1	0.211	-26.25
4.6206	0.23	0.2115	-26.25
4.6315	-0.25	0.212	-26.1875
4.6424	-0.25	0.2125	-26.25
4.6533	0.09	0.213	-26.0938
4.6642	-0.14	0.2135	-26.1562
4.6751	0.04	0.214	-26.3438
4.686	0.52	0.2145	-26.2188
4.6969	-0.11	0.215	-26.3438
4.7078	0.02	0.2155	-26.2812
4.7187	0.13	0.216	-26.5625
4.7296	-0.03	0.2165	-26.3125
4.7405	0.1	0.217	-26.2812
4.7514	-0.11	0.2175	-26.2812
4.7623	-0.32	0.218	-26.3125
4.7732	0.19	0.2185	-26.2812
4.7841	-0.16	0.219	-26.2812
4.795	0.23	0.2195	-26.375
4.8058	0.13	0.22	-26.3125
4.8167	-0.22	0.2205	-26.1875
4.8276	-0.22	0.221	-26.2812
4.8385	-0.05	0.2215	-26.25
4.8494	0.13	0.222	-26.4375
4.8603	0.48	0.2225	-26.3125
4.8712	0.32	0.223	-26.3438
4.8821	-0.03	0.2235	-26.4062
4.893	0.05	0.224	-26.3125
4.9039	-0.18	0.2245	-26.1875
4.9148	0.32	0.225	-26.125
4.9257	-0.08	0.2255	-25.875
4.9366	-0.41	0.226	-25.9062
4.9475	-0.52	0.2265	-25.8125
4.9584	0.33	0.227	-25.7812
4.9693	-0.23	0.2275	-25.6562
4.9802	0.29	0.228	-25.7812
4.9911	0.37	0.2285	-25.7188
5.002	0.44	0.229	-25.75
5.0129	-0.28	0.2295	-25.8438
5.0238	0.14	0.23	-25.6562
5.0347	0.03	0.2305	-25.7812
5.0456	0.12	0.231	-25.7188
5.0565	-0.05	0.2315	-25.8438
5.0674	-0.79	0.232	-25.7188
5.0783	-0.09	0.2325	-25.7812
5.0892	-0.31	0.233	-26.0625
5.1001	-0.13	0.2335	-26.125
5.111	-0.24	0.234	-26.125
5.1219	0.02	0.2345	-26.0312
5.1328	-0.12	0.235	-26.25
5.1437	-0.45	0.2355	-26.1875
5.1546	0.35	0.236	-26.2188
5.1655	0.26	0.2365	-26.1562
5.1764	-0.15	0.237	-26.25
5.1873	-0.27	0.2375	-26.2812
5.1982	-0.22	0.238	-26.2188
5.2091	-0.18	0.2385	-26.2188
5.22	-0.18	0.239	-26.25
5.2309	0.34	0.2395	-26.1875
5.2418	0.21	0.24	-26.25
5.2527	-0.17	0.2405	-26.1875
5.2636	0.69	0.241	-26.25
5.2744	-0.03	0.2415	-26.375
5.2853	-0.11	0.242	-26.25
5.2962	0.39	0.2425	-26.1875
5.3071	0.3	0.243	-26.2812
5.318	0.78	0.2435	-26.1875
5.3289	1.33	0.244	-26.25
5.3398	1.91	0.2445	-26.25
5.3507	2.32	0.245	-26.2188
5.3616	1.89	0.2455	-26.0625
5.3725	1.5	0.246	-26.25
5.3834	1.67	0.2465	-26.25
5.3943	1.64	0.247	-26.1875
5.4052	1.72	0.2475	-26.125
5.4161	1.54	0.248	-26.2188
5.427	1.31	0.2485	-26.1562
5.4379	0.78	0.249	-26.1562
5.4488	1.24	0.2495	-26.0625
5.4597	0.25	0.25	-26.0312
5.4706	-0.6	0.2505	-26.25
5.4815	-0.43	0.251	-26.125
5.4924	-0.32	0.2515	-25.9375
5.5033	-0.43	0.252	-25.9062
5.5142	-0.68	0.2525	-25.9375
5.5251	-0.1	0.253	-26.0312
5.536	-0.12	0.2535	-25.9375
5.5469	-0.88	0.254	-25.9688
5.5578	-0.28	0.2545	-26.0312
5.5687	-0.72	0.255	-25.9375
5.5796	-0.87	0.2555	-26.0312
5.5905	-0.84	0.256	-25.8438
5.6014	-0.55	0.2565	-25.875
5.6123	-0.71	0.257	-25.8438
5.6232	-0.31	0.2575	-25.8125
5.6341	-0.66	0.258	-25.875
5.645	-0.27	0.2585	-25.875
5.6559	-0.05	0.259	-25.9062
5.6668	-0.15	0.2595	-26.0938
5.6777	-0.28	0.26	-26.0938
5.6886	-0.26	0.2605	-25.9688
5.6995	-0.11	0.261	-26.125
5.7104	-0.37	0.2615	-25.8438
5.7212	0.21	0.262	-26.0938
5.7321	-0.29	0.2625	-26.0938
5.743	-0.5	0.263	-26.0938
5.7539	-0.15	0.2635	-26.1875
5.7648	-0.17	0.264	-26.0312
5.7757	-0.66	0.2645	-26.25
5.7866	-0.19	0.265	-26.1562
5.7975	-0.36	0.2655	-26.1562
5.8084	-0.42	0.266	-26.1875
5.8193	-0.4	0.2665	-26.0625
5.8302	-0.55	0.267	-25.9688
5.8411	-0.77	0.2675	-25.9062
5.852	-0.4	0.268	-25.875
5.8629	-0.92	0.2685	-25.9375
5.8738	-0.14	0.269	-25.9375
5.8847	-0.36	0.2695	-26.0312
5.8956	-0.1	0.27	-26.0625
5.9065	0.22	0.2705	-26.0312
5.9174	0.02	0.271	-25.9688
5.9283	0.33	0.2715	-26.0938
5.9392	-0.1	0.272	-25.875
5.9501	0.33	0.2725	-25.8438
5.961	0.37	0.273	-25.7812
5.9719	0.29	0.2735	-25.7812
5.9828	-0.16	0.274	-25.8438
5.9937	-0.17	0.2745	-25.8125
6.0046	-0.51	0.275	-25.875
6.0155	-0.17	0.2755	-26.0312
6.0264	-0.85	0.276	-25.9688
6.0373	-0.33	0.2765	-25.8438
6.0482	-0.25	0.277	-25.9375
6.0591	-0.37	0.2775	-26.0312
6.07	-0.18	0.278	-25.8125
6.0809	-0.06	0.2785	-26.0312
6.0918	-0.37	0.279	-25.7812
6.1027	-0.14	0.2795	-25.75
6.1136	0.06	0.28	-25.7188
6.1245	-0.3	0.2805	-25.5938
6.1354	-0.33	0.281	-25.5625
6.1463	-0.29	0.2815	-25.5938
6.1572	0.08	0.282	-25.6562
6.1681	-0.04	0.2825	-25.5312
6.179	0.05	0.283	-25.5
6.1898	-0.27	0.2835	-25.375
6.2007	0.04	0.284	-25.375
6.2116	-0.6	0.2845	-25.4688
6.2225	-0.53	0.285	-25.4688
6.2334	-0.09	0.2855	-25.5
6.2443	-0.55	0.286	-25.5312
6.2552	-0.23	0.2865	-25.5312
6.2661	-0.2	0.287	-25.4062
6.277	0.28	0.2875	-25.5312
6.2879	-0.03	0.288	-25.5625
6.2988	-0.57	0.2885	-25.375
6.3097	-0.59	0.289	-25.375
6.3206	-0.12	0.2895	-25.0312
6.3315	-0.39	0.29	-25.125
6.3424	0.27	0.2905	-25.125
6.3533	-0.36	0.291	-24.9688
6.3642	-0.12	0.2915	-25.0312
6.3751	0.26	0.292	-25
6.386	0.11	0.2925	-25.0312
6.3969	-0.44	0.293	-25.0938
6.4078	-0.43	0.2935	-24.8125
6.4187	-0.2	0.294	-24.9062
6.4296	-0.28	0.2945	-25
6.4405	-0.38	0.295	-24.9375
6.4514	-0.09	0.2955	-24.9688
6.4623	0.18	0.296	-25.0625
6.4732	0.28	0.2965	-25
6.4841	-0.29	0.297	-24.8125
6.495	0.03	0.2975	-24.8125
6.5059	-0.4	0.298	-24.9375
6.5168	-0.23	0.2985	-24.6562
6.5277	-0.52	0.299	-24.7188
6.5386	-0.89	0.2995	-24.8125
6.5495	-0.44	0.3	-24.7188
6.5604	0.28	0.3005	-24.5625
6.5713	0.07	0.301	-24.625
6.5822	-0.45	0.3015	-24.625
6.5931	-0.16	0.302	-24.7188
6.604	-0.12	0.3025	-24.625
6.6149	-0.23	0.303	-24.7188
6.6258	0.13	0.3035	-24.5625
6.6366	0.18	0.304	-24.5312
6.6475	-0.35	0.3045	-24.5625
6.6584	-0.12	0.305	-24.4062
6.6693	-0.51	0.3055	-24.75
6.6802	-0.34	0.306	-24.5312
6.6911	-0.38	0.3065	-24.6875
6.702	-0.49	0.307	-24.6562
6.7129	-0.47	0.3075	-24.6562
6.7238	-0.27	0.308	-24.6875
6.7347	0.14	0.3085	-24.75
6.7456	-0.34	0.309	-24.75
6.7565	-0.77	0.3095	-24.4688
6.7674	-0.13	0.31	-24.625
6.7783	-0.51	0.3105	-24.4688
6.7892	-0.22	0.311	-24.5
6.8001	-0.36	0.3115	-24.4375
6.811	-0.31	0.312	-24.4062
6.8219	-0.57	0.3125	-24.4062
6.8328	-0.37	0.313	-24.3438
6.8437	-0.15	0.3135	-24.4375
6.8546	-0.51	0.314	-24.5625
6.8655	-0.77	0.3145	-24.5312
6.8764	-0.27	0.315	-24.625
6.8873	-0.23	0.3155	-24.375
6.8982	-0.52	0.316	-24.5625
6.9091	-0.15	0.3165	-24.375
6.92	-0.57	0.317	-24.4688
6.9309	-0.5	0.3175	-24.5625
6.9418	-0.71	0.318	-24.25
6.9527	0.13	0.3185	-24.3438
6.9636	-0.1	0.319	-24.25
6.9745	-0.2	0.3195	-24.25
6.9854	-0.53	0.32	-24.4688
6.9963	-0.55	0.3205	-24.4375
7.0072	-0.59	0.321	-24.5
7.0181	-0.24	0.3215	-24.5625
7.029	-0.31	0.322	-24.7188
7.0399	-0.16	0.3225	-24.5312
7.0508	-0.29	0.323	-24.6875
7.0617	-0.61	0.3235	-24.4688
7.0726	-0.88	0.324	-24.3438
7.0835	-0.36	0.3245	-24.5
7.0944	-0.17	0.325	-24.4062
7.1052	-0.37	0.3255	-24.375
7.1161	-0.23	0.326	-24.3125
7.127	-0.52	0.3265	-24.4062
7.1379	-0.39	0.327	-24.4688
7.1488	-0.11	0.3275	-24.5625
7.1597	-0.35	0.328	-24.4062
7.1706	-0.43	0.3285	-24.3125
7.1815	-0.19	0.329	-24.1875
7.1924	0.27	0.3295	-24.0312
7.2033	-0.13	0.33	-23.9375
7.2142	0.06	0.3305	-24.0625
7.2251	-0.2	0.331	-23.8438
7.236	-0.6	0.3315	-23.75
7.2469	-0.03	0.332	-23.75
7.2578	0.05	0.3325	-23.7188
7.2687	-0.1	0.333	-23.8125
7.2796	-0.39	0.3335	-23.8125
7.2905	-0.16	0.334	-23.625
7.3014	-0.77	0.3345	-23.875
7.3123	-0.58	0.335	-23.7188
7.3232	0.03	0.3355	-23.875
7.3341	-0.15	0.336	-23.9688
7.345	0.24	0.3365	-23.9688
7.3559	-0.35	0.337	-23.875
7.3668	-0.42	0.3375	-23.7812
7.3777	0.06	0.338	-24
7.3886	-0.18	0.3385	-24.0312
7.3995	-0.41	0.339	-23.8438
7.4104	-0.16	0.3395	-24.1875
7.4213	-0.21	0.34	-24.25
7.4322	-0.06	0.3405	-24.1875
7.4431	-0.15	0.341	-24
7.454	-0.42	0.3415	-24.2188
7.4649	-0.45	0.342	-24.4375
7.4758	-0.26	0.3425	-24.3438
7.4867	-0.56	0.343	-24.2812
7.4976	-0.13	0.3435	-24.3438
7.5085	-0.2	0.344	-24.3125
7.5194	-0.45	0.3445	-24.4062
7.5303	0.02	0.345	-24.4062
7.5412	-0.1	0.3455	-24.5312
7.552	-0.47	0.346	-24.5
7.5629	-0.28	0.3465	-24.4375
7.5738	0.04	0.347	-24.5312
7.5847	-0.73	0.3475	-24.4062
7.5956	-0.5	0.348	-24.5625
7.6065	0.13	0.3485	-24.7188
7.6174	-0.3	0.349	-24.6562
7.6283	-0.28	0.3495	-24.5
7.6392	-0.43	0.35	-24.6875
7.6501	-0.42	0.3505	-24.6562
7.661	-0.13	0.351	-24.7812
7.6719	-0.3	0.3515	-24.75
7.6828	-0.57	0.352	-24.6562
7.6937	-0.29	0.3525	-24.7812
7.7046	-0.21	0.353	-24.9375
7.7155	-0.51	0.3535	-24.7812
7.7264	-0.09	0.354	-24.8438
7.7373	-0.26	0.3545	-24.9062
7.7482	0.02	0.355	-24.8125
7.7591	-0.75	0.3555	-24.8125
7.77	-0.35	0.356	-24.9688
7.7809	-0.26	0.3565	-24.9375
7.7918	-0.09	0.357	-25
7.8027	-0.1	0.3575	-24.9375
7.8136	-0.12	0.358	-24.8125
7.8245	0.21	0.3585	-24.875
7.8354	-0.24	0.359	-24.8438
7.8463	-0.34	0.3595	-24.9062
7.8572	0.07	0.36	-24.9062
7.8681	-0.52	0.3605	-25.0312
7.879	0.11	0.361	-25.1562
7.8899	0.2	0.3615	-25.0625
7.9008	-0.21	0.362	-25.0625
7.9117	0.17	0.3625	-25.3438
7.9226	-0.04	0.363	-25.1875
7.9335	0.42	0.3635	-25.2188
7.9444	0.28	0.364	-25.125
7.9553	0.06	0.3645	-24.9062
7.9662	0.11	0.365	-24.9062
7.9771	0.02	0.3655	-24.9375
7.988	0.21	0.366	-25.0312
7.9989	0.42	0.3665	-25
8.0098	0.15	0.367	-25.0312
8.0206	-0.05	0.3675	-25
8.0315	-0.34	0.368	-25
8.0424	-0.09	0.3685	-25
8.0533	-0.29	0.369	-25.0625
8.0642	0.2	0.3695	-25
8.0751	-0.04	0.37	-25.0312
8.086	0.22	0.3705	-24.9688
8.0969	0.16	0.371	-25.2812
8.1078	0.73	0.3715	-25.125
8.1187	0.55	0.372	-25.2188
8.1296	-0.05	0.3725	-25.125
8.1405	0.14	0.373	-25.1875
8.1514	0.66	0.3735	-25.25
8.1623	0.26	0.374	-25.2812
8.1732	0.27	0.3745	-25.5
8.1841	0.39	0.375	-25.4062
8.195	0.86	0.3755	-25.5625
8.2059	0.19	0.376	-25.6562
8.2168	0.35	0.3765	-25.5938
8.2277	0.22	0.377	-25.5312
8.2386	0.32	0.3775	-25.5312
8.2495	0.37	0.378	-25.5625
8.2604	-0.13	0.3785	-25.5312
8.2713	0.36	0.379	-25.5
8.2822	0.27	0.3795	-25.5312
8.2931	-0.27	0.38	-25.7188
8.304	0.42	0.3805	-25.6562
8.3149	0.2	0.381	-25.5938
8.3258	0.34	0.3815	-25.5
8.3367	0.32	0.382	-25.7188
8.3476	0.41	0.3825	-25.7188
8.3585	0.71	0.383	-25.6875
8.3694	0.54	0.3835	-25.625
8.3803	0.77	0.384	-25.5
8.3912	1.55	0.3845	-25.625
8.4021	1.92	0.385	-25.5625
8.413	2.16	0.3855	-25.6875
8.4239	1.92	0.386	-25.5625
8.4348	1.98	0.3865	-25.6562
8.4457	1.87	0.387	-25.75
8.4566	1.71	0.3875	-25.7188
8.4674	1.58	0.388	-25.875
8.4783	1.76	0.3885	-25.7812
8.4892	1.57	0.389	-25.8125
8.5001	1.37	0.3895	-25.7812
8.511	1.43	0.39	-25.8125
8.5219	1.45	0.3905	-25.7812
8.5328	1.43	0.391	-25.9375
8.5437	0.26	0.3915	-26.0312
8.5546	-0.23	0.392	-25.9062
8.5655	-0.03	0.3925	-26.0312
8.5764	0.04	0.393	-26.0938
8.5873	-0.3	0.3935	-26.0312
8.5982	-0.19	0.394	-25.875
8.6091	-0.26	0.3945	-25.9062
8.62	-0.33	0.395	-25.9688
8.6309	-0.57	0.3955	-26.0312
8.6418	-0.29	0.396	-26.0312
8.6527	-0.55	0.3965	-25.9375
8.6636	-0.35	0.397	-26.0938
8.6745	-0.37	0.3975	-26.0938
8.6854	-0.59	0.398	-25.9688
8.6963	-0.28	0.3985	-26.1562
8.7072	-0.43	0.399	-25.875
8.7181	-0.62	0.3995	-25.9688
8.729	-0.57	0.4	-26.0625
8.7399	-0.13	0.4005	-26.0312
8.7508	-0.27	0.401	-26.125
8.7617	-0.46	0.4015	-26.0938
8.7726	-0.4	0.402	-26.1562
8.7835	-0.28	0.4025	-26.1875
8.7944	-0.35	0.403	-25.9688
8.8053	-0.19	0.4035	-25.9688
8.8162	-0.47	0.404	-26.0625
8.8271	-0.58	0.4045	-26.0938
8.838	-0.32	0.405	-26.125
8.8489	-0.07	0.4055	-26.0625
8.8598	-0.18	0.406	-26.0938
8.8707	0.97	0.4065	-25.9062
8.8816	0.77	0.407	-26.0625
8.8925	1.27	0.4075	-26.1562
8.9034	0.76	0.408	-25.9062
8.9143	0.16	0.4085	-25.8125
8.9252	-0.17	0.409	-25.875
8.936	-0.16	0.4095	-25.7812
8.9469	0.16	0.41	-25.8438
8.9578	0.1	0.4105	-25.9062
8.9687	-0.26	0.411	-25.9062
8.9796	0.04	0.4115	-26.0625
8.9905	-0.18	0.412	-26.25
9.0014	-0.21	0.4125	-26.1562
9.0123	-0.2	0.413	-26.0625
9.0232	-0.41	0.4135	-26.3438
9.0341	-0.47	0.414	-26.1562
9.045	-0.16	0.4145	-25.9062
9.0559	0	0.415	-25.8438
9.0668	-0.56	0.4155	-25.9688
9.0777	-0.36	0.416	-26.125
9.0886	-0.33	0.4165	-25.9688
9.0995	-0.83	0.417	-26.0312
9.1104	-0.45	0.4175	-26.2188
9.1213	-0.37	0.418	-26.1562
9.1322	-0.14	0.4185	-26.0625
9.1431	-0.18	0.419	-25.8438
9.154	-0.44	0.4195	-25.8438
9.1649	-0.23	0.42	-25.8438
9.1758	-0.34	0.4205	-25.75
9.1867	-0.43	0.421	-25.8125
9.1976	-0.18	0.4215	-25.8438
9.2085	-0.43	0.422	-25.75
9.2194	-0.33	0.4225	-25.9062
9.2303	-0.04	0.423	-25.6562
9.2412	0.05	0.4235	-25.8125
9.2521	-0.14	0.424	-25.625
9.263	-0.25	0.4245	-25.625
9.2739	0.07	0.425	-25.7188
9.2848	-0.26	0.4255	-25.5625
9.2957	-0.51	0.426	-25.6875
9.3066	-0.38	0.4265	-25.875
9.3175	0.25	0.427	-25.7812
9.3284	-0.32	0.4275	-25.9375
9.3393	0.18	0.428	-25.8438
9.3502	0	0.4285	-25.8438
9.3611	-0.04	0.429	-25.875
9.372	-0.05	0.4295	-25.9375
9.3828	-0.17	0.43	-25.875
9.3937	0.1	0.4305	-25.9062
9.4046	0.15	0.431	-26.0625
9.4155	0.12	0.4315	-25.875
9.4264	0.1	0.432	-26.0625
9.4373	0.26	0.4325	-25.875
9.4482	-0.35	0.433	-25.8438
9.4591	-0.11	0.4335	-25.7188
9.47	0.11	0.434	-25.875
9.4809	-0.19	0.4345	-25.75
9.4918	-0.44	0.435	-25.7812
9.5027	-0.28	0.4355	-25.6875
9.5136	-0.01	0.436	-25.75
9.5245	-0.22	0.4365	-25.875
9.5354	-0.25	0.437	-25.875
9.5463	-0.48	0.4375	-25.6875
9.5572	0.41	0.438	-25.8438
9.5681	-0.21	0.4385	-25.5938
9.579	0.24	0.439	-25.6875
9.5899	0.44	0.4395	-25.8438
9.6008	0.42	0.44	-25.7188
9.6117	0.18	0.4405	-25.8438
9.6226	-0.21	0.441	-25.7188
9.6335	0.23	0.4415	-25.6562
9.6444	0.22	0.442	-25.6875
9.6553	0.33	0.4425	-25.7812
9.6662	0.51	0.443	-25.875
9.6771	0.46	0.4435	-25.7188
9.688	0.2	0.444	-25.5625
9.6989	0.19	0.4445	-25.4062
9.7098	0.11	0.445	-25.5312
9.7207	0.36	0.4455	-25.5
9.7316	-0.18	0.446	-25.5312
9.7425	-0.22	0.4465	-25.3438
9.7534	-0.14	0.447	-25.4688
9.7643	0.2	0.4475	-25.25
9.7752	-0.13	0.448	-25.375
9.7861	0.29	0.4485	-25.4062
9.797	-0.34	0.449	-25.3438
9.8079	0.04	0.4495	-25.375
9.8188	0.22	0.45	-25.2812
9.8297	0.46	0.4505	-25.1875
9.8406	0.43	0.451	-25.3438
9.8514	-0.18	0.4515	-25.2188
9.8623	0.21	0.452	-25.2188
9.8732	0.02	0.4525	-25.25
9.8841	0.17	0.453	-25.3438
9.895	0.13	0.4535	-25.1562
9.9059	0.17	0.454	-25.125
9.9168	-0.01	0.4545	-25.125
9.9277	-0.13	0.455	-25.125
9.9386	-0.33	0.4555	-24.9375
9.9495	0.02	0.456	-25.0625
9.9604	0.03	0.4565	-25.0312
9.9713	0.1	0.457	-25
9.9822	0.59	0.4575	-25.0625
9.9931	0.41	0.458	-25.0625
10.004	0.77	0.4585	-25.0312
10.0149	1.26	0.459	-24.75
10.0258	1.54	0.4595	-24.7812
10.0367	2.18	0.46	-24.625
10.0476	2.39	0.4605	-24.7188
10.0585	1.81	0.461	-24.5
10.0694	1.41	0.4615	-24.5
10.0803	1.49	0.462	-24.4688
10.0912	1.45	0.4625	-24.3438
10.1021	1.29	0.463	-24.4062
10.113	0.98	0.4635	-24.4375
10.1239	0.86	0.464	-24.2812
10.1348	0.09	0.4645	-24.3125
10.1457	-0.16	0.465	-24.1875
10.1566	-0.29	0.4655	-24.3438
10.1675	-0.37	0.466	-24.2188
10.1784	-0.4	0.4665	-24.1875
10.1893	-0.54	0.467	-24.25
10.2002	-0.28	0.4675	-24.25
10.2111	-0.75	0.468	-24.3438
10.222	-0.32	0.4685	-24.2812
10.2329	-0.16	0.469	-24.5625
10.2438	-0.66	0.4695	-24.25
10.2547	-0.4	0.47	-24.4062
10.2656	-0.45	0.4705	-24.4688
10.2765	-0.96	0.471	-24.3125
10.2874	-0.48	0.4715	-24.375
10.2982	-0.46	0.472	-24.4375
10.3091	-0.23	0.4725	-24.375
10.32	-0.6	0.473	-24.3438
10.3309	-0.66	0.4735	-24.3125
10.3418	-0.22	0.474	-24.5625
10.3527	-0.42	0.4745	-24.3438
10.3636	-0.51	0.475	-24.5
10.3745	-0.8	0.4755	-24.3438
10.3854	-0.7	0.476	-24.3125
10.3963	-0.44	0.4765	-24.4688
10.4072	-0.63	0.477	-24.4688
10.4181	-0.26	0.4775	-24.4062
10.429	-0.18	0.478	-24.4062
10.4399	-0.29	0.4785	-24.4688
10.4508	-0.45	0.479	-24.5312
10.4617	-0.56	0.4795	-24.5625
10.4726	-0.44	0.48	-24.4688
10.4835	-0.57	0.4805	-24.5
10.4944	-0.69	0.481	-24.5312
10.5053	-0.22	0.4815	-24.375
10.5162	-1.08	0.482	-24.25
10.5271	-0.21	0.4825	-24.1875
10.538	-0.14	0.483	-24.125
10.5489	-0.28	0.4835	-24
10.5598	-0.46	0.484	-24
10.5707	-0.1	0.4845	-23.9688
10.5816	-0.71	0.485	-23.9688
10.5925	-0.4	0.4855	-24.1562
10.6034	-0.58	0.486	-24.0625
10.6143	-0.28	0.4865	-23.9375
10.6252	0.08	0.487	-24.0312
10.6361	-0.56	0.4875	-24.0938
10.647	-0.37	0.488	-24.125
10.6579	-0.7	0.4885	-23.9688
10.6688	-0.74	0.489	-24.0312
10.6797	-0.43	0.4895	-24.0625
10.6906	-0.82	0.49	-23.875
10.7015	-0.35	0.4905	-23.9688
10.7124	-0.52	0.491	-24.0312
10.7233	-0.64	0.4915	-24.0625
10.7342	-0.79	0.492	-24
10.7451	-0.24	0.4925	-24.2812
10.756	-0.57	0.493	-24.125
10.7668	-0.3	0.4935	-24.0312
10.7777	-0.59	0.494	-24.0312
10.7886	-0.08	0.4945	-23.9375
10.7995	-0.1	0.495	-23.9375
10.8104	0.31	0.4955	-23.875
10.8213	-0.09	0.496	-23.9375
10.8322	-0.22	0.4965	-24.125
10.8431	-0.34	0.497	-23.75
10.854	-0.3	0.4975	-23.8125
10.8649	-0.31	0.498	-23.75
10.8758	-0.58	0.4985	-23.7812
10.8867	-0.57	0.499	-23.9375
10.8976	-0.03	0.4995	-23.7188
10.9085	-0.47	0.5	-23.8125
10.9194	-0.11	0.5005	-23.5625
10.9303	-0.17	0.501	-23.625
10.9412	-0.3	0.5015	-23.75
10.9521	-0.23	0.502	-23.8125
10.963	0.03	0.5025	-23.7812
10.9739	-0.22	0.503	-23.875
10.9848	-0.47	0.5035	-23.7812
10.9957	-0.36	0.504	-23.8438
11.0066	0.01	0.5045	-23.6875
11.0175	0.06	0.505	-23.8438
11.0284	0.34	0.5055	-23.5938
11.0393	-0.28	0.506	-23.5938
11.0502	-0.5	0.5065	-23.5312
11.0611	-0.47	0.507	-23.6875
11.072	-0.21	0.5075	-23.8438
11.0829	-0.22	0.508	-24
11.0938	-0.5	0.5085	-23.875
11.1047	-0.38	0.509	-23.9688
11.1156	-0.57	0.5095	-23.8438
11.1265	-0.14	0.51	-23.7812
11.1374	-0.26	0.5105	-23.7188
11.1483	0.41	0.511	-23.9375
11.1592	-0.01	0.5115	-23.5312
11.1701	-0.08	0.512	-23.4062
11.181	0.01	0.5125	-23.2812
11.1919	-0.19	0.513	-23.5312
11.2028	0.12	0.5135	-23.125
11.2136	0.01	0.514	-23.3125
11.2245	0.09	0.5145	-23.3438
11.2354	-0.54	0.515	-23.25
11.2463	0.28	0.5155	-23.3125
11.2572	0.33	0.516	-23.2812
11.2681	0.36	0.5165	-23.25
11.279	-0.19	0.517	-23.2812
11.2899	0.64	0.5175	-23.125
11.3008	0.31	0.518	-23.25
11.3117	0.54	0.5185	-22.9375
11.3226	0.08	0.519	-23.0938
11.3335	0.35	0.5195	-23
11.3444	0.21	0.52	-23
11.3553	0.39	0.5205	-23.0625
11.3662	0.63	0.521	-23
11.3771	0.47	0.5215	-22.875
11.388	-0.17	0.522	-22.875
11.3989	0.56	0.5225	-22.8438
11.4098	0.29	0.523	-22.6875
11.4207	0	0.5235	-22.7812
11.4316	0.17	0.524	-22.75
11.4425	0.04	0.5245	-22.7812
11.4534	0.37	0.525	-22.625
11.4643	0.31	0.5255	-22.625
11.4752	0.18	0.526	-22.375
11.4861	0.57	0.5265	-22.5312
11.497	0.07	0.527	-22.3438
11.5079	0.3	0.5275	-22.4688
11.5188	0.23	0.528	-22.3125
11.5297	0.67	0.5285	-22.3438
11.5406	0.25	0.529	-22.1875
11.5515	0.02	0.5295	-22.0625
11.5624	0.49	0.53	-21.9375
11.5733	0.58	0.5305	-21.9688
11.5842	0.2	0.531	-21.7188
11.5951	-0.02	0.5315	-21.8438
11.606	0.07	0.532	-21.8125
11.6169	0.35	0.5325	-21.8438
11.6278	-0.1	0.533	-21.6875
11.6387	-0.08	0.5335	-21.75
11.6496	-0.03	0.534	-21.8125
11.6605	0.05	0.5345	-21.9062
11.6714	0.07	0.535	-21.75
11.6822	0.05	0.5355	-21.875
11.6931	-0.25	0.536	-22
11.704	-0.1	0.5365	-22.0938
11.7149	-0.05	0.537	-22
11.7258	-0.1	0.5375	-21.875
11.7367	0.19	0.538	-22.0938
11.7476	0.97	0.5385	-22.1562
11.7585	-0.1	0.539	-22.125
11.7694	-0.13	0.5395	-22.3125
11.7803	0.26	0.54	-22.3125
11.7912	0.39	0.5405	-22.4062
11.8021	-0.36	0.541	-22.3438
11.813	0.38	0.5415	-22.375
11.8239	0.49	0.542	-22.375
11.8348	0.18	0.5425	-22.1875
11.8457	0.25	0.543	-22.3438
11.8566	0.64	0.5435	-22.0625
11.8675	0.44	0.544	-22.25
11.8784	0.34	0.5445	-22.0938
11.8893	0.36	0.545	-22.125
11.9002	0.77	0.5455	-22.0625
11.9111	0.57	0.546	-22.1562
11.922	-0.04	0.5465	-21.9375
11.9329	0.75	0.547	-21.9375
11.9438	0.4	0.5475	-22.0938
11.9547	0.95	0.548	-22
11.9656	0.35	0.5485	-22
11.9765	-0.08	0.549	-22.0312
11.9874	0.42	0.5495	-22.0625
11.9983	-0.47	0.55	-21.9062
12.0092	0.05	0.5505	-21.8438
12.0201	-0.09	0.551	-22.0625
12.031	0.09	0.5515	-21.9062
12.0419	0.3	0.552	-21.9688
12.0528	0.03	0.5525	-22.0312
12.0637	-0.02	0.553	-21.9062
12.0746	0.06	0.5535	-22
12.0855	-0.13	0.554	-21.9375
12.0964	0.5	0.5545	-21.9688
12.1073	0.2	0.555	-21.9375
12.1182	0.42	0.5555	-21.875
12.129	-0.14	0.556	-21.6875
12.1399	0.1	0.5565	-21.75
12.1508	0.2	0.557	-21.6875
12.1617	0.46	0.5575	-21.6875
12.1726	0.43	0.558	-21.5625
12.1835	0.47	0.5585	-21.625
12.1944	0.44	0.559	-21.5312
12.2053	0.41	0.5595	-21.625
12.2162	1.25	0.56	-21.6562
12.2271	0.42	0.5605	-21.6562
12.238	0.61	0.561	-21.875
12.2489	0.37	0.5615	-21.7188
12.2598	0.35	0.562	-21.8438
12.2707	0.78	0.5625	-21.75
12.2816	0.33	0.563	-21.625
12.2925	0.78	0.5635	-21.6562
12.3034	0.49	0.564	-21.5625
12.3143	0.42	0.5645	-21.4688
12.3252	0.85	0.565	-21.4688
12.3361	0.26	0.5655	-21.375
12.347	0.63	0.566	-21.4688
12.3579	0.06	0.5665	-21.5
12.3688	0.4	0.567	-21.625
12.3797	0.18	0.5675	-21.5
12.3906	0.22	0.568	-21.2812
12.4015	0.17	0.5685	-21.6562
12.4124	0.39	0.569	-21.4375
12.4233	0.09	0.5695	-21.625
12.4342	0.39	0.57	-21.5312
12.4451	0.35	0.5705	-21.375
12.456	0.19	0.571	-21.3438
12.4669	0.08	0.5715	-21.2812
12.4778	0.25	0.572	-21.1875
12.4887	0.17	0.5725	-21.1562
12.4996	0.22	0.573	-21.125
12.5105	0.21	0.5735	-21.0312
12.5214	0.29	0.574	-20.9375
12.5323	-0.33	0.5745	-21.0312
12.5432	0.06	0.575	-21.0312
12.5541	0.15	0.5755	-21.1562
12.565	-0.13	0.576	-20.8125
12.5759	0.17	0.5765	-20.9062
12.5868	0.3	0.577	-20.75
12.5976	0.09	0.5775	-20.6875
12.6085	0	0.578	-20.9062
12.6194	-0.51	0.5785	-20.7812
12.6303	-0.15	0.579	-20.9688
12.6412	0.17	0.5795	-20.8438
12.6521	-0.07	0.58	-20.9688
12.663	-0.3	0.5805	-20.9375
12.6739	0.48	0.581	-20.9688
12.6848	-0.12	0.5815	-20.9062
12.6957	-0.23	0.582	-20.75
12.7066	-0.06	0.5825	-20.8438
12.7175	0.03	0.583	-20.7188
12.7284	0.18	0.5835	-20.6562
12.7393	0.49	0.584	-20.6562
12.7502	0.34	0.5845	-20.625
12.7611	-0.11	0.585	-20.7188
12.772	0.17	0.5855	-20.6562
12.7829	-0.19	0.586	-20.5938
12.7938	0.43	0.5865	-20.625
12.8047	-0.21	0.587	-20.625
12.8156	0.21	0.5875	-20.7812
12.8265	0.33	0.588	-20.5625
12.8374	0.2	0.5885	-20.7812
12.8483	0.03	0.589	-20.5312
12.8592	-0.02	0.5895	-20.4375
12.8701	-0.17	0.59	-20.5312
12.881	0.03	0.5905	-20.3438
12.8919	-0.09	0.591	-20.3125
12.9028	-0.07	0.5915	-20.3438
12.9137	0.11	0.592	-20.5312
12.9246	-0.18	0.5925	-20.5
12.9355	-0.22	0.593	-20.5
12.9464	-0.15	0.5935	-20.5312
12.9573	-0.17	0.594	-20.5938
12.9682	-0.01	0.5945	-20.5
12.9791	0.29	0.595	-20.5312
12.99	0.47	0.5955	-20.5625
13.0009	0.04	0.596	-20.4375
13.0118	0.52	0.5965	-20.5
13.0227	-0.02	0.597	-20.5312
13.0336	0.21	0.5975	-20.3125
13.0444	0.55	0.598	-20.4375
13.0553	0.4	0.5985	-20.5625
13.0662	0.24	0.599	-20.6562
13.0771	0.09	0.5995	-20.625
13.088	-0.02	0.6	-20.75
13.0989	0.18	0.6005	-20.7188
13.1098	-0.05	0.601	-20.6875
13.1207	-0.29	0.6015	-20.875
13.1316	-0.18	0.602	-20.5938
13.1425	-0.06	0.6025	-20.7188
13.1534	0.42	0.603	-20.7812
13.1643	0.03	0.6035	-20.75
13.1752	0.11	0.604	-20.5938
13.1861	-0.27	0.6045	-20.8438
13.197	0.32	0.605	-20.6875
13.2079	-0.13	0.6055	-20.875
13.2188	0.41	0.606	-20.6562
13.2297	-0.2	0.6065	-20.6875
13.2406	-0.19	0.607	-20.9688
13.2515	-0.24	0.6075	-20.9375
13.2624	0.02	0.608	-20.75
13.2733	0.21	0.6085	-20.8125
13.2842	0.2	0.609	-20.875
13.2951	0.27	0.6095	-20.9062
13.306	-0.02	0.61	-20.7188
13.3169	-0.14	0.6105	-20.5625
13.3278	-0.07	0.611	-20.6875
13.3387	-0.21	0.6115	-20.6875
13.3496	0	0.612	-20.5938
13.3605	-0.22	0.6125	-20.6875
13.3714	-0.05	0.613	-20.6875
13.3823	0.04	0.6135	-20.6562
13.3932	0.61	0.614	-20.6875
13.4041	-0.14	0.6145	-20.7188
13.415	0.05	0.615	-20.6562
13.4259	-0.3	0.6155	-20.7812
13.4368	0.09	0.616	-20.6875
13.4477	0.22	0.6165	-20.6562
13.4586	-0.42	0.617	-20.625
13.4695	-0.05	0.6175	-20.7188
13.4804	-0.23	0.618	-20.6562
13.4913	-0.19	0.6185	-20.5
13.5022	0.08	0.619	-20.75
13.513	0.06	0.6195	-20.75
13.5239	0.32	0.62	-21.0312
13.5348	-0.48	0.6205	-20.75
13.5457	0.02	0.621	-20.75
13.5566	-0.27	0.6215	-20.8125
13.5675	-0.01	0.622	-20.8125
13.5784	0.03	0.6225	-20.8438
13.5893	-0.13	0.623	-20.7188
13.6002	-0.49	0.6235	-20.7812
13.6111	-0.61	0.624	-20.875
13.622	0.13	0.6245	-20.8125
13.6329	-0.49	0.625	-20.8438
13.6438	-0.4	0.6255	-20.8125
13.6547	-0.32	0.626	-20.5625
13.6656	0.34	0.6265	-20.6875
13.6765	0.05	0.627	-20.6562
13.6874	-0.01	0.6275	-20.625
13.6983	-0.45	0.628	-20.5
13.7092	-0.3	0.6285	-20.75
13.7201	-0.18	0.629	-20.5312
13.731	-0.4	0.6295	-20.6875
13.7419	0	0.63	-20.4688
13.7528	-0.25	0.6305	-20.5
13.7637	0.03	0.631	-20.75
13.7746	-0.03	0.6315	-20.4688
13.7855	-0.05	0.632	-20.7188
13.7964	-0.33	0.6325	-20.5625
13.8073	-0.11	0.633	-20.5625
13.8182	0.03	0.6335	-20.4688
13.8291	-0.19	0.634	-20.4375
13.84	-0.11	0.6345	-20.3438
13.8509	0.29	0.635	-20.4062
13.8618	0.1	0.6355	-20.4062
13.8727	0.02	0.636	-20.3125
13.8836	0.3	0.6365	-20.625
13.8945	-0.17	0.637	-20.5312
13.9054	0.02	0.6375	-20.625
13.9163	-0.04	0.638	-20.5625
13.9272	-0.4	0.6385	-20.7188
13.9381	0.16	0.639	-20.7188
13.949	-0.15	0.6395	-20.625
13.9598	-0.16	0.64	-20.75
13.9707	0.03	0.6405	-20.8438
13.9816	0.52	0.641	-20.875
13.9925	-0.38	0.6415	-20.8125
14.0034	-0.12	0.642	-20.75
14.0143	-0.18	0.6425	-20.7188
14.0252	0.05	0.643	-20.8125
14.0361	0.04	0.6435	-20.75
14.047	0.14	0.644	-20.9375
14.0579	-0.12	0.6445	-20.9375
14.0688	0.03	0.645	-21.0625
14.0797	-0.16	0.6455	-21.1562
14.0906	0.01	0.646	-21.125
14.1015	-0.07	0.6465	-21.1562
14.1124	0.31	0.647	-20.9375
14.1233	-0.39	0.6475	-21.125
14.1342	-0.07	0.648	-21.2188
14.1451	-0.2	0.6485	-21.1875
14.156	0.02	0.649	-21.375
14.1669	0.03	0.6495	-21.2188
14.1778	-0.14	0.65	-21.3438
14.1887	-0.03	0.6505	-21.3438
14.1996	0.01	0.651	-21.4062
14.2105	-0.1	0.6515	-21.4062
14.2214	-0.05	0.652	-21.1875
14.2323	0.38	0.6525	-21.1875
14.2432	-0.43	0.653	-21.3125
14.2541	0.08	0.6535	-21.0312
14.265	0.67	0.654	-21.1875
14.2759	0.26	0.6545	-21.2812
14.2868	-0.71	0.655	-21.2812
14.2977	-0.28	0.6555	-21.125
14.3086	-0.42	0.656	-21.2188
14.3195	0.51	0.6565	-21.3125
14.3304	0.21	0.657	-21
14.3413	0.18	0.6575	-21.25
14.3522	0.12	0.658	-21
14.3631	-0.06	0.6585	-21.2188
14.374	-0.6	0.659	-21.1562
14.3849	0.06	0.6595	-21.2812
14.3958	0.08	0.66	-21.1875
14.4067	-0.17	0.6605	-21.3438
14.4176	0.44	0.661	-21.4062
14.4284	-0.12	0.6615	-21.4688
14.4393	0.47	0.662	-21.1562
14.4502	-0.31	0.6625	-21.4375
14.4611	-0.26	0.663	-21.5938
14.472	-0.01	0.6635	-21.5625
14.4829	-0.45	0.664	-21.5312
14.4938	-0.07	0.6645	-21.6875
14.5047	0.01	0.665	-21.7188
14.5156	-0.49	0.6655	-21.75
14.5265	-0.19	0.666	-21.6875
14.5374	0.04	0.6665	-21.5625
14.5483	0.19	0.667	-21.5625
14.5592	-0.17	0.6675	-21.4375
14.5701	0.14	0.668	-21.7188
14.581	-0.23	0.6685	-21.8125
14.5919	-0.27	0.669	-21.75
14.6028	0.32	0.6695	-21.9062
14.6137	0.29	0.67	-21.75
14.6246	0.27	0.6705	-21.7188
14.6355	0.27	0.671	-21.9375
14.6464	-0.41	0.6715	-22.0312
14.6573	-0.1	0.672	-21.8438
14.6682	0.01	0.6725	-21.9062
14.6791	-0.28	0.673	-21.8438
14.69	0.18	0.6735	-21.875
14.7009	0.1	0.674	-21.9062
14.7118	0.15	0.6745	-21.6875
14.7227	-0.4	0.675	-21.75
14.7336	-0.36	0.6755	-21.625
14.7445	0.2	0.676	-21.625
14.7554	0.03	0.6765	-21.6875
14.7663	0.03	0.677	-21.7188
14.7772	-0.33	0.6775	-21.5625
14.7881	-0.15	0.678	-21.75
14.799	-0.01	0.6785	-21.75
14.8099	0.19	0.679	-21.6562
14.8208	0.13	0.6795	-21.8125
14.8317	-0.44	0.68	-21.8125
14.8426	0.27	0.6805	-21.9375
14.8535	-0.11	0.681	-21.9062
14.8644	-0.21	0.6815	-21.8125
14.8753	-0.39	0.682	-21.75
14.8861	-0.07	0.6825	-21.625
14.897	-0.24	0.683	-21.625
14.9079	-0.11	0.6835	-21.5312
14.9188	-0.22	0.684	-21.625
14.9297	0.11	0.6845	-21.8125
14.9406	0.05	0.685	-21.8438
14.9515	-0.42	0.6855	-22.0312
14.9624	0.06	0.686	-22.125
14.9733	0.06	0.6865	-21.9688
14.9842	0.02	0.687	-22.1562
14.9951	-0.4	0.6875	-22.1562
15.006	-0.2	0.688	-22.0625
15.0169	-0.55	0.6885	-22.1562
15.0278	-0.24	0.689	-22.25
15.0387	-0.25	0.6895	-22.0938
15.0496	-0.09	0.69	-22.1562
15.0605	0.05	0.6905	-22.1875
15.0714	-0.48	0.691	-22.3438
15.0823	0.26	0.6915	-22.375
15.0932	0.13	0.692	-22.25
15.1041	-0.02	0.6925	-22.1875
15.115	-0.17	0.693	-22.0938
15.1259	-0.09	0.6935	-22.1562
15.1368	0.39	0.694	-22.3125
15.1477	0.54	0.6945	-22.3438
15.1586	0.44	0.695	-22.2812
15.1695	0.25	0.6955	-22.25
15.1804	0.23	0.696	-22.1875
15.1913	-0.19	0.6965	-22.4062
15.2022	0.37	0.697	-22.4062
15.2131	-0.19	0.6975	-22.4375
15.224	0.24	0.698	-22.4375
15.2349	0.2	0.6985	-22.5312
15.2458	0.19	0.699	-22.4375
15.2567	0.77	0.6995	-22.5312
15.2676	0.03	0.7	-22.625
15.2785	0.3	0.7005	-22.5625
15.2894	-0.19	0.701	-22.6562
15.3003	0.47	0.7015	-22.6562
15.3112	0.39	0.702	-22.5938
15.3221	-0.43	0.7025	-22.625
15.333	0.11	0.703	-22.5312
15.3438	-0.36	0.7035	-22.5938
15.3547	0.25	0.704	-22.5312
15.3656	-0.05	0.7045	-22.3438
15.3765	0	0.705	-22.3438
15.3874	-0.24	0.7055	-22.3438
15.3983	0.19	0.706	-22.375
15.4092	0.36	0.7065	-22.25
15.4201	0.07	0.707	-22.4062
15.431	-0.07	0.7075	-22.5312
15.4419	-0.06	0.708	-22.375
15.4528	0.35	0.7085	-22.4688
15.4637	0.22	0.709	-22.4375
15.4746	0.11	0.7095	-22.5312
15.4855	-0.2	0.71	-22.5938
15.4964	0.07	0.7105	-22.5938
15.5073	-0.15	0.711	-22.5625
15.5182	-0.15	0.7115	-22.5938
15.5291	-0.06	0.712	-22.5625
15.54	-0.21	0.7125	-22.3438
15.5509	-0.02	0.713	-22.7188
15.5618	0.15	0.7135	-22.4375
15.5727	0.05	0.714	-22.5312
15.5836	0.11	0.7145	-22.625
15.5945	0.36	0.715	-22.5938
15.6054	0.24	0.7155	-22.6562
15.6163	-0.39	0.716	-22.5938
15.6272	-0.21	0.7165	-22.75
15.6381	-0.13	0.717	-22.6875
15.649	0.47	0.7175	-22.7188
15.6599	-0.13	0.718	-22.7812
15.6708	0.18	0.7185	-22.8438
15.6817	-0.47	0.719	-22.9062
15.6926	0.02	0.7195	-22.875
15.7035	0.05	0.72	-22.9062
15.7144	-0.04	0.7205	-22.75
15.7253	0.4	0.721	-22.7812
15.7362	0.12	0.7215	-22.9062
15.7471	0.56	0.722	-22.9062
15.758	0.23	0.7225	-22.9062
15.7689	0.09	0.723	-22.9688
15.7798	0.24	0.7235	-22.8438
15.7907	-0.04	0.724	-22.875
15.8015	0.02	0.7245	-22.9375
15.8124	0.22	0.725	-22.75
15.8233	0.3	0.7255	-22.75
15.8342	0.47	0.726	-22.9375
15.8451	0.32	0.7265	-22.75
15.856	0.01	0.727	-22.7188
15.8669	0.21	0.7275	-22.8125
15.8778	-0.15	0.728	-22.7188
15.8887	-0.07	0.7285	-22.75
15.8996	-0.02	0.729	-22.75
15.9105	-0.02	0.7295	-22.625
15.9214	0.39	0.73	-22.7188
15.9323	0.6	0.7305	-22.8125
15.9432	0.21	0.731	-22.75
15.9541	0.33	0.7315	-22.75
15.965	0.13	0.732	-22.625
15.9759	-0.29	0.7325	-22.6562
15.9868	0.14	0.733	-22.5938
15.9977	0.54	0.7335	-22.6875
16.0086	0.23	0.734	-22.6875
16.0195	0.05	0.7345	-22.4688
16.0304	0.13	0.735	-22.6875
16.0413	0	0.7355	-22.6875
16.0522	0.25	0.736	-22.625
16.0631	-0.23	0.7365	-22.6562
16.074	-0.29	0.737	-22.6562
16.0849	0.04	0.7375	-22.625
16.0958	0.11	0.738	-22.6562
16.1067	0.01	0.7385	-22.7188
16.1176	0.21	0.739	-22.7188
16.1285	0	0.7395	-22.75
16.1394	-0.01	0.74	-22.5312
16.1503	0.39	0.7405	-22.4688
16.1612	0.37	0.741	-22.1875
16.1721	0.27	0.7415	-22.0625
16.183	0.36	0.742	-22.1875
16.1939	-0.19	0.7425	-21.9375
16.2048	0.14	0.743	-22.0625
16.2157	0.23	0.7435	-21.9375
16.2266	0.16	0.744	-22.0625
16.2375	-0.33	0.7445	-22
16.2484	-0.35	0.745	-22.0312
16.2592	-0.03	0.7455	-22.0938
16.2701	0.1	0.746	-21.9688
16.281	0.32	0.7465	-22.1875
16.2919	0.45	0.747	-22
16.3028	0.43	0.7475	-21.9062
16.3137	-0.41	0.748	-21.9375
16.3246	0.26	0.7485	-21.9375
16.3355	-0.16	0.749	-21.875
16.3464	-0.12	0.7495	-21.8438
16.3573	-0.13	0.75	-21.6875
16.3682	-0.13	0.7505	-21.8438
16.3791	-0.07	0.751	-22
16.39	-0.02	0.7515	-21.9062
16.4009	-0.07	0.752	-21.9375
16.4118	-0.34	0.7525	-22.0312
16.4227	-0.07	0.753	-21.9688
16.4336	-0.68	0.7535	-22.0625
16.4445	-0.08	0.754	-22.0625
16.4554	0.02	0.7545	-22
16.4663	-0.2	0.755	-22.125
16.4772	-0.11	0.7555	-22.0938
16.4881	-0.47	0.756	-22.0312
16.499	-0.44	0.7565	-22.0938
16.5099	-0.55	0.757	-22.0625
16.5208	0.14	0.7575	-22.0312
16.5317	-0.33	0.758	-21.9062
16.5426	0.09	0.7585	-21.9375
16.5535	0.11	0.759	-22.125
16.5644	0.2	0.7595	-22.1875
16.5753	0.57	0.76	-22.2188
16.5862	0.24	0.7605	-22.125
16.5971	0.07	0.761	-22.125
16.608	0.03	0.7615	-22.25
16.6189	0.03	0.762	-22.25
16.6298	-0.43	0.7625	-22.125
16.6407	0.05	0.763	-22.25
16.6516	0.36	0.7635	-22.1562
16.6625	-0.17	0.764	-22.2188
16.6734	0.17	0.7645	-22.4688
16.6843	-0.03	0.765	-22.25
16.6952	0.69	0.7655	-22.5625
16.706	-0.1	0.766	-22.5938
16.7169	0.06	0.7665	-22.5312
16.7278	-0.19	0.767	-22.3438
16.7387	-0.46	0.7675	-22.3125
16.7496	-0.17	0.768	-22.4375
16.7605	0.06	0.7685	-22.2812
16.7714	0.07	0.769	-22.2188
16.7823	-0.14	0.7695	-22.4375
16.7932	0.46	0.77	-22.2188
16.8041	-0.13	0.7705	-22.3125
16.815	0.29	0.771	-22.4062
16.8259	-0.11	0.7715	-22.4062
16.8368	-0.13	0.772	-22.4375
16.8477	0.34	0.7725	-22.375
16.8586	0.27	0.773	-22.3125
16.8695	-0.24	0.7735	-22.3438
16.8804	0	0.774	-22.375
16.8913	0.64	0.7745	-22.4375
16.9022	-0.19	0.775	-22.5625
16.9131	0.38	0.7755	-22.5938
16.924	0.95	0.776	-22.4375
16.9349	0.93	0.7765	-22.4688
16.9458	1.61	0.777	-22.375
16.9567	1.32	0.7775	-22.4375
16.9676	1.44	0.778	-22.4375
16.9785	1.65	0.7785	-22.25
16.9894	1.57	0.779	-22.375
17.0003	1.39	0.7795	-22.375
17.0112	1.76	0.78	-22.5312
17.0221	1.09	0.7805	-22.625
17.033	1.67	0.781	-22.6875
17.0439	0.93	0.7815	-22.625
17.0548	0.89	0.782	-22.6875
17.0657	0.97	0.7825	-22.9062
17.0766	1.01	0.783	-22.7188
17.0875	0.54	0.7835	-22.6562
17.0984	-0.12	0.784	-22.9062
17.1093	-0.44	0.7845	-22.7812
17.1202	-0.96	0.785	-22.9375
17.1311	0.13	0.7855	-23.125
17.142	-0.53	0.786	-23
17.1529	-0.29	0.7865	-23.125
17.1638	0.19	0.787	-23.125
17.1746	-0.24	0.7875	-22.9375
17.1855	-0.74	0.788	-23
17.1964	-0.18	0.7885	-23.1562
17.2073	0.14	0.789	-23.0625
17.2182	-0.16	0.7895	-23.125
17.2291	-0.07	0.79	-22.9688
17.24	-0.81	0.7905	-23.0625
17.2509	-0.18	0.791	-22.9688
17.2618	-0.33	0.7915	-22.9688
17.2727	-0.42	0.792	-22.9375
17.2836	-0.5	0.7925	-22.9062
17.2945	-0.38	0.793	-22.7188
17.3054	-0.29	0.7935	-22.7812
17.3163	-0.22	0.794	-22.8125
17.3272	-0.47	0.7945	-22.9375
17.3381	-0.45	0.795	-22.875
17.349	-0.42	0.7955	-22.9375
17.3599	-0.73	0.796	-22.875
17.3708	-1.2	0.7965	-22.9688
17.3817	-0.79	0.797	-22.875
17.3926	-0.21	0.7975	-22.7812
17.4035	-0.55	0.798	-22.6562
17.4144	-0.36	0.7985	-22.5938
17.4253	-0.51	0.799	-22.75
17.4362	-0.26	0.7995	-22.6875
17.4471	-0.43	0.8	-22.7812
17.458	-0.44	0.8005	-22.6875
17.4689	-0.4	0.801	-22.625
17.4798	-0.37	0.8015	-22.625
17.4907	-0.71	0.802	-22.4688
17.5016	-0.76	0.8025	-22.5938
17.5125	-0.36	0.803	-22.5938
17.5234	-0.19	0.8035	-22.5312
17.5343	-0.4	0.804	-22.4375
17.5452	-0.68	0.8045	-22.4375
17.5561	-0.72	0.805	-22.3438
17.567	-0.33	0.8055	-22.5625
17.5779	-0.21	0.806	-22.3438
17.5888	-0.34	0.8065	-22.4062
17.5997	-0.55	0.807	-22.5312
17.6106	-0.26	0.8075	-22.6562
17.6214	-0.46	0.808	-22.4688
17.6323	-0.17	0.8085	-22.6562
17.6432	-0.11	0.809	-22.5312
17.6541	0.15	0.8095	-22.6875
17.665	-0.29	0.81	-22.6875
17.6759	-0.15	0.8105	-22.8125
17.6868	-0.38	0.811	-22.7812
17.6977	-0.34	0.8115	-22.5625
17.7086	-0.53	0.812	-22.8125
17.7195	-0.29	0.8125	-22.9375
17.7304	-0.2	0.813	-22.9688
17.7413	0.28	0.8135	-22.8438
17.7522	0.17	0.814	-23.0625
17.7631	-0.02	0.8145	-22.9062
17.774	-0.3	0.815	-23.125
17.7849	-0.17	0.8155	-22.9062
17.7958	-0.48	0.816	-22.9688
17.8067	0.27	0.8165	-22.9375
17.8176	-0.45	0.817	-22.7812
17.8285	0.09	0.8175	-22.875
17.8394	-0.13	0.818	-22.875
17.8503	0	0.8185	-22.9062
17.8612	-0.03	0.819	-22.8125
17.8721	-0.06	0.8195	-22.8438
17.883	-0.32	0.82	-22.8438
17.8939	-0.08	0.8205	-22.8125
17.9048	-0.37	0.821	-22.875
17.9157	-0.04	0.8215	-22.9375
17.9266	-0.57	0.822	-22.8438
17.9375	-0.62	0.8225	-22.9375
17.9484	-0.54	0.823	-22.875
17.9593	-0.1	0.8235	-22.9688
17.9702	-0.33	0.824	-22.9062
17.9811	-0.64	0.8245	-22.9375
17.992	0.05	0.825	-22.9375
18.0029	0.19	0.8255	-22.9688
18.0138	-0.29	0.826	-22.9688
18.0247	-0.27	0.8265	-23
18.0356	-0.41	0.827	-22.875
18.0465	-0.77	0.8275	-22.875
18.0574	-0.11	0.828	-22.9688
18.0683	-0.04	0.8285	-22.75
18.0792	-0.52	0.829	-22.7812
18.09	-0.14	0.8295	-22.75
18.1009	-0.17	0.83	-22.8125
18.1118	-0.3	0.8305	-22.875
18.1227	-0.37	0.831	-22.875
18.1336	-0.13	0.8315	-22.8125
18.1445	-0.03	0.832	-22.9688
18.1554	-0.11	0.8325	-22.8438
18.1663	0.08	0.833	-22.9688
18.1772	0.04	0.8335	-22.875
18.1881	-0.07	0.834	-22.8438
18.199	0.35	0.8345	-22.9062
18.2099	-0.1	0.835	-22.9062
18.2208	-0.2	0.8355	-22.8125
18.2317	0.2	0.836	-22.9375
18.2426	-0.12	0.8365	-22.7188
18.2535	-0.08	0.837	-22.6875
18.2644	-0.05	0.8375	-22.625
18.2753	0.44	0.838	-22.5938
18.2862	-0.13	0.8385	-22.4688
18.2971	0.25	0.839	-22.2812
18.308	-0.41	0.8395	-22.4062
18.3189	-0.46	0.84	-22.375
18.3298	0.05	0.8405	-22.5625
18.3407	0.41	0.841	-22.2188
18.3516	-0.22	0.8415	-22.3438
18.3625	0.26	0.842	-22.375
18.3734	-0.08	0.8425	-22.4062
18.3843	-0.17	0.843	-22.2812
18.3952	-0.19	0.8435	-22.375
18.4061	-0.08	0.844	-22.2188
18.417	-0.35	0.8445	-22.25
18.4279	-0.14	0.845	-22.2812
18.4388	0.11	0.8455	-22.2812
18.4497	-0.06	0.846	-22.25
18.4606	-0.18	0.8465	-22.2188
18.4715	0.11	0.847	-22.125
18.4824	-0.11	0.8475	-22.2812
18.4933	-0.18	0.848	-22.0938
18.5042	-0.23	0.8485	-22.1875
18.5151	-0.21	0.849	-22.0312
18.526	0.06	0.8495	-22.1562
18.5368	-0.23	0.85	-22
18.5477	-0.43	0.8505	-22.0625
18.5586	0.26	0.851	-22.2188
18.5695	0.05	0.8515	-22.1875
18.5804	0.15	0.852	-22.1875
18.5913	0.03	0.8525	-22.0938
18.6022	-0.04	0.853	-22.2188
18.6131	-0.11	0.8535	-22.25
18.624	0.01	0.854	-22.1875
18.6349	-0.07	0.8545	-22.0938
18.6458	0.23	0.855	-22
18.6567	0.11	0.8555	-22.0625
18.6676	-0.78	0.856	-22.1562
18.6785	-0.54	0.8565	-22
18.6894	-0.06	0.857	-22.0938
18.7003	-0.48	0.8575	-22.0938
18.7112	-0.23	0.858	-21.9062
18.7221	0.31	0.8585	-22.0312
18.733	-0.33	0.859	-21.9062
18.7439	-0.15	0.8595	-22.1562
18.7548	-0.66	0.86	-21.9375
18.7657	-0.17	0.8605	-22.125
18.7766	0.16	0.861	-21.875
18.7875	0.33	0.8615	-21.9688
18.7984	0.38	0.862	-22.0312
18.8093	-0.13	0.8625	-22.1875
18.8202	0.07	0.863	-22
18.8311	0.33	0.8635	-22.1875
18.842	-0.04	0.864	-22.0938
18.8529	0.16	0.8645	-22.0312
18.8638	0.02	0.865	-22.0938
18.8747	-0.06	0.8655	-22.1875
18.8856	0.02	0.866	-22.1875
18.8965	-0.05	0.8665	-22.1875
18.9074	0.13	0.867	-22.375
18.9183	-0.05	0.8675	-22.1875
18.9292	0.47	0.868	-22.5312
18.9401	0.49	0.8685	-22.375
18.951	0.48	0.869	-22.5938
18.9619	0.84	0.8695	-22.4062
18.9728	1.41	0.87	-22.5312
18.9837	1.39	0.8705	-22.625
18.9946	1.58	0.871	-22.4688
19.0054	1.65	0.8715	-22.5625
19.0163	1.23	0.872	-22.5938
19.0272	1.25	0.8725	-22.5938
19.0381	1.58	0.873	-22.8125
19.049	1.14	0.8735	-22.7812
19.0599	1.2	0.874	-22.6562
19.0708	1.14	0.8745	-22.6562
19.0817	0.93	0.875	-22.7188
19.0926	0.63	0.8755	-22.7188
19.1035	1.09	0.876	-22.6875
19.1144	0.55	0.8765	-22.6875
19.1253	0.28	0.877	-22.7188
19.1362	0.16	0.8775	-22.625
19.1471	0.06	0.878	-22.875
19.158	-0.16	0.8785	-22.625
19.1689	-0.31	0.879	-22.8125
19.1798	-0.09	0.8795	-22.8438
19.1907	-0.12	0.88	-22.875
19.2016	-0.05	0.8805	-22.9062
19.2125	0.16	0.881	-22.9688
19.2234	-0.21	0.8815	-22.9688
19.2343	0	0.882	-23.0312
19.2452	0.09	0.8825	-23.0625
19.2561	0.38	0.883	-23.0938
19.267	-0.05	0.8835	-22.9688
19.2779	0.1	0.884	-22.875
19.2888	-0.4	0.8845	-22.875
19.2997	-0.28	0.885	-22.875
19.3106	-0.12	0.8855	-22.7812
19.3215	-0.36	0.886	-22.7812
19.3324	-0.68	0.8865	-22.6875
19.3433	-0.48	0.887	-22.8438
19.3542	-0.35	0.8875	-22.875
19.3651	-0.53	0.888	-22.875
19.376	-0.47	0.8885	-22.8438
19.3869	-0.36	0.889	-22.7188
19.3978	-0.14	0.8895	-22.6875
19.4087	-0.3	0.89	-22.4688
19.4196	-0.2	0.8905	-22.3125
19.4305	-0.79	0.891	-22.4062
19.4414	-0.2	0.8915	-22.3438
19.4522	0	0.892	-22.1875
19.4631	-0.31	0.8925	-22.0312
19.474	-0.18	0.893	-22.125
19.4849	-0.48	0.8935	-21.9062
19.4958	-0.02	0.894	-21.9375
19.5067	-0.82	0.8945	-21.8438
19.5176	-0.17	0.895	-21.9688
19.5285	-0.47	0.8955	-21.9062
19.5394	0.22	0.896	-21.875
19.5503	-0.45	0.8965	-21.9375
19.5612	-1.02	0.897	-21.875
19.5721	-0.86	0.8975	-21.8438
19.583	-0.68	0.898	-21.75
19.5939	-0.49	0.8985	-21.8438
19.6048	-0.33	0.899	-21.8438
19.6157	0.31	0.8995	-21.8438
19.6266	-0.66	0.9	-21.875
19.6375	-0.71	0.9005	-21.9062
19.6484	-0.82	0.901	-21.8125
19.6593	-0.84	0.9015	-22
19.6702	-0.27	0.902	-21.9062
19.6811	-0.52	0.9025	-21.9062
19.692	0.52	0.903	-22.125
19.7029	-0.18	0.9035	-22.0312
19.7138	-0.24	0.904	-21.9375
19.7247	-0.16	0.9045	-21.875
19.7356	-0.33	0.905	-21.9375
19.7465	-0.84	0.9055	-21.9062
19.7574	-0.35	0.906	-21.875
19.7683	0.09	0.9065	-21.75
19.7792	-0.21	0.907	-21.9688
19.7901	-0.16	0.9075	-21.875
19.801	-0.35	0.908	-21.875
19.8119	-0.16	0.9085	-21.8125
19.8228	-0.29	0.909	-21.9375
19.8337	-0.21	0.9095	-21.9062
19.8446	-0.07	0.91	-21.6562
19.8555	-0.31	0.9105	-21.6875
19.8664	-0.71	0.911	-21.625
19.8773	-0.13	0.9115	-21.6875
19.8882	-0.19	0.912	-21.875
19.8991	-0.53	0.9125	-21.9688
19.91	-0.11	0.913	-21.75
19.9208	0.33	0.9135	-21.875
19.9317	-0.07	0.914	-21.5312
19.9426	0.47	0.9145	-21.7188
19.9535	0.27	0.915	-21.5
19.9644	-0.21	0.9155	-21.3125
19.9753	0.06	0.916	-21.3125
19.9862	0.32	0.9165	-21
19.9971	-0.55	0.917	-21.1562
20.008	-0.1	0.9175	-21
20.0189	-0.03	0.918	-20.9062
20.0298	-0.3	0.9185	-20.9375
20.0407	0.16	0.919	-20.8125
20.0516	-0.1	0.9195	-20.8438
20.0625	-0.25	0.92	-20.6562
20.0734	-0.05	0.9205	-20.8125
20.0843	-0.42	0.921	-20.75
20.0952	0.24	0.9215	-20.625
20.1061	-0.23	0.922	-20.625
20.117	0.3	0.9225	-20.5
20.1279	0.08	0.923	-20.5625
20.1388	-0.44	0.9235	-20.5625
20.1497	0.19	0.924	-20.75
20.1606	-0.04	0.9245	-20.6875
20.1715	0.27	0.925	-20.625
20.1824	0.53	0.9255	-20.6875
20.1933	-0.11	0.926	-20.4375
20.2042	0.07	0.9265	-20.5312
20.2151	0.43	0.927	-20.3125
20.226	0.67	0.9275	-20.4375
20.2369	0.9	0.928	-20.5
20.2478	1.15	0.9285	-20.3438
20.2587	1.03	0.929	-20.125
20.2696	1.25	0.9295	-19.8438
20.2805	1.25	0.93	-19.75
20.2914	1.63	0.9305	-19.625
20.3023	1.27	0.931	-19.4062
20.3132	1.39	0.9315	-19.375
20.3241	0.99	0.932	-19.1875
20.335	0.68	0.9325	-19.0312
20.3459	1.12	0.933	-18.75
20.3568	0.49	0.9335	-18.375
20.3676	0.11	0.934	-17.9688
20.3785	-0.15	0.9345	-17.9688
20.3894	0	0.935	-17.9375
20.4003	0.2	0.9355	-17.9375
20.4112	0.56	0.936	-17.875
20.4221	0.13	0.9365	-17.8125
20.433	-0.06	0.937	-17.9375
20.4439	0.17	0.9375	-17.9375
20.4548	0.11	0.938	-17.9062
20.4657	-0.42	0.9385	-18
20.4766	-0.03	0.939	-17.6875
20.4875	-0.17	0.9395	-17.625
20.4984	0.01	0.94	-17.75
20.5093	-0.52	0.9405	-17.9375
20.5202	-0.42	0.941	-17.8438
20.5311	-0.18	0.9415	-17.8438
20.542	-0.09	0.942	-17.875
20.5529	-0.16	0.9425	-17.8125
20.5638	-0.28	0.943	-17.9375
20.5747	-0.02	0.9435	-17.7812
20.5856	-0.05	0.944	-17.875
20.5965	-0.17	0.9445	-17.75
20.6074	-0.05	0.945	-18.0625
20.6183	0.07	0.9455	-18
20.6292	0.49	0.946	-17.9375
20.6401	0.14	0.9465	-17.875
20.651	0.28	0.947	-17.9375
20.6619	0.3	0.9475	-18.0312
20.6728	0.14	0.948	-17.9688
20.6837	0.41	0.9485	-17.7812
20.6946	0.11	0.949	-17.9062
20.7055	0.02	0.9495	-18.0312
20.7164	0.19	0.95	-17.875
20.7273	0.08	0.9505	-17.9688
20.7382	-0.2	0.951	-18
20.7491	0.53	0.9515	-18
20.76	0.45	0.952	-18.1875
20.7709	-0.14	0.9525	-18.1875
20.7818	0.13	0.953	-18.2188
20.7927	0.09	0.9535	-18.2188
20.8036	0.28	0.954	-18.125
20.8145	-0.07	0.9545	-18.0312
20.8254	0.24	0.955	-18.125
20.8362	-0.01	0.9555	-18.125
20.8471	-0.1	0.956	-18.0938
20.858	-0.2	0.9565	-18.1562
20.8689	-0.06	0.957	-18.1875
20.8798	-0.28	0.9575	-17.9688
20.8907	-0.36	0.958	-18.0938
20.9016	-0.27	0.9585	-18.0312
20.9125	0.12	0.959	-18.0938
20.9234	-0.6	0.9595	-18.0312
20.9343	0.32	0.96	-18.1562
20.9452	-0.2	0.9605	-17.875
20.9561	-0.08	0.961	-18.0938
20.967	-0.28	0.9615	-18.125
20.9779	-0.13	0.962	-18.0625
20.9888	0.14	0.9625	-18.125
20.9997	-0.19	0.963	-18.2188
21.0106	-0.49	0.9635	-18.1562
21.0215	-0.35	0.964	-18.3438
21.0324	-0.24	0.9645	-18.1875
21.0433	-0.24	0.965	-18.0625
21.0542	-0.3	0.9655	-18.0938
21.0651	-0.47	0.966	-18.0938
21.076	0.03	0.9665	-18.1875
21.0869	-0.07	0.967	-18.1875
21.0978	-0.12	0.9675	-17.9688
21.1087	-0.55	0.968	-18.0625
21.1196	-0.23	0.9685	-18.0938
21.1305	-0.13	0.969	-17.9062
21.1414	0.17	0.9695	-17.9688
21.1523	0.35	0.97	-17.7188
21.1632	0.01	0.9705	-17.8125
21.1741	0.03	0.971	-17.75
21.185	-0.31	0.9715	-17.9375
21.1959	0.41	0.972	-17.875
21.2068	-0.06	0.9725	-17.9375
21.2177	-0.03	0.973	-17.9375
21.2286	-0.22	0.9735	-18.0312
21.2395	-0.22	0.974	-18.0312
21.2504	-0.2	0.9745	-18.0312
21.2613	0.14	0.975	-18.0312
21.2722	-0.58	0.9755	-17.8438
21.283	0.07	0.976	-17.9688
21.2939	-0.28	0.9765	-17.9375
21.3048	0.03	0.977	-17.8125
21.3157	-0.22	0.9775	-17.875
21.3266	-0.71	0.978	-18
21.3375	-0.2	0.9785	-18
21.3484	-0.12	0.979	-17.6875
21.3593	-0.77	0.9795	-17.9062
21.3702	0.1	0.98	-17.9062
21.3811	-0.16	0.9805	-17.9375
21.392	-0.06	0.981	-18
21.4029	0.02	0.9815	-18.0625
21.4138	-0.07	0.982	-18.1875
21.4247	0.03	0.9825	-18.5625
21.4356	0.39	0.983	-18.4688
21.4465	-0.05	0.9835	-18.4375
21.4574	0.13	0.984	-18.5312
21.4683	0.09	0.9845	-18.4688
21.4792	-0.13	0.985	-18.5625
21.4901	-0.73	0.9855	-18.4688
21.501	-0.27	0.986	-18.375
21.5119	-0.19	0.9865	-18.375
21.5228	0.52	0.987	-18.4375
21.5337	0.54	0.9875	-18.7812
21.5446	0.18	0.988	-18.5625
21.5555	-0.22	0.9885	-18.5938
21.5664	-0.28	0.989	-18.5625
21.5773	0.15	0.9895	-18.4688
21.5882	-0.36	0.99	-18.4688
21.5991	-0.5	0.9905	-18.4062
21.61	-0.1	0.991	-18.25
21.6209	0.11	0.9915	-18.4688
21.6318	-0.29	0.992	-18.5625
21.6427	-0.3	0.9925	-18.5
21.6536	-0.23	0.993	-18.4688
21.6645	0.19	0.9935	-18.5625
21.6754	-0.42	0.994	-18.4688
21.6863	-0.2	0.9945	-18.4062
21.6972	-0.13	0.995	-18.3438
21.7081	-0.09	0.9955	-18.375
21.719	-0.01	0.996	-18.3438
21.7299	-0.58	0.9965	-18.5625
21.7408	0	0.997	-18.4062
21.7516	0.09	0.9975	-18.375
21.7625	0.07	0.998	-18.3438
21.7734	0.41	0.9985	-18.4688
[truncated: 40,003 more rows]

## Sheet: 2 B
optical			electrical
	Title: 5 7 Date: 2022/07/19 15:09		Time (s)	20220719 5-7.asc
Time	dF/F0_bleach_correct	Wavelength	0	-19.0013
0.01	0	535	0.0005	-19.1263
0.02	0	535	0.001	-18.6263
0.0301	0	535	0.0015	-19.1888
0.0401	0	535	0.002	-19.1263
0.0501	0	535	0.0025	-18.9701
0.0601	0	535	0.003	-19.9076
0.0701	0	535	0.0035	-19.2826
0.0802	0	535	0.004	-18.8763
0.0902	0	535	0.0045	-18.6263
0.1002	0	535	0.005	-18.0325
0.1102	0	535	0.0055	-18.6575
0.1202	0	535	0.006	-18.1888
0.1302	0	535	0.0065	-19.3763
0.1403	0	535	0.007	-17.97
0.1503	0	535	0.0075	-18.8138
0.1603	0	535	0.008	-18.7513
0.1703	0	535	0.0085	-18.47
0.1803	0	535	0.009	-20.3139
0.1904	0	535	0.0095	-18.9076
0.2004	0	535	0.01	-18.1888
0.2104	0	535	0.0105	-18.1262
0.2204	0	535	0.011	-19.7826
0.2304	0	535	0.0115	-17.8762
0.2405	0	535	0.012	-18.1575
0.2505	0	535	0.0125	-17.7512
0.2605	0	535	0.013	-20.1576
0.2705	0	535	0.0135	-18.7513
0.2805	0	535	0.014	-17.1574
0.2905	0	535	0.0145	-19.0638
0.3006	0	535	0.015	-16.6261
0.3106	0	535	0.0155	-19.8139
0.3206	0	535	0.016	-17.7512
0.3306	0	535	0.0165	-19.3763
0.3406	0	535	0.017	-17.1262
0.3507	0	535	0.0175	-19.6576
0.3607	0	535	0.018	-16.5636
0.3707	0	535	0.0185	-18.7826
0.3807	0	535	0.019	-17.47
0.3907	0	535	0.0195	-17.845
0.4008	0	535	0.02	-16.6886
0.4108	0	535	0.0205	-17.97
0.4208	0	535	0.021	-17.9075
0.4308	0	535	0.0215	-18.8451
0.4408	0	535	0.022	-18.2825
0.4509	0	535	0.0225	-17.3762
0.4609	0	535	0.023	-17.9387
0.4709	0	535	0.0235	-17.2824
0.4809	0	535	0.024	-17.7512
0.4909	0	535	0.0245	-17.845
0.5009	0	535	0.025	-17.8137
0.511	0	535	0.0255	-18.6888
0.521	0	535	0.026	-18.3138
0.531	0	535	0.0265	-17.97
0.541	0	535	0.027	-17.5637
0.551	0	535	0.0275	-17.5637
0.5611	0	535	0.028	-18.7513
0.5711	0	535	0.0285	-17.7512
0.5811	0	535	0.029	-18.8451
0.5911	0	535	0.0295	-19.4076
0.6011	0	535	0.03	-19.1263
0.6112	0	535	0.0305	-20.0951
0.6212	0	535	0.031	-18.8138
0.6312	0	535	0.0315	-19.5013
0.6412	0	535	0.032	-19.7826
0.6512	0	535	0.0325	-19.0638
0.6612	0	535	0.033	-20.0326
0.6713	0	535	0.0335	-19.1263
0.6813	0	535	0.034	-20.3139
0.6913	0	535	0.0345	-21.5952
0.7013	0	535	0.035	-20.0014
0.7113	0	535	0.0355	-20.0639
0.7214	0	535	0.036	-21.189
0.7314	0	535	0.0365	-20.8452
0.7414	0	535	0.037	-20.4077
0.7514	0	535	0.0375	-22.7516
0.7614	0	535	0.038	-19.5951
0.7715	0	535	0.0385	-22.6578
0.7815	0	535	0.039	-20.8139
0.7915	0	535	0.0395	-21.9078
0.8015	0	535	0.04	-22.5328
0.8115	0	535	0.0405	-21.7828
0.8215	0	535	0.041	-23.6266
0.8316	0	535	0.0415	-20.3764
0.8416	0	535	0.042	-24.0329
0.8516	0	535	0.0425	-20.6264
0.8616	0	535	0.043	-24.0017
0.8716	0	535	0.0435	-22.0015
0.8817	0	535	0.044	-23.8454
0.8917	0	535	0.0445	-22.8766
0.9017	0	535	0.045	-23.0328
0.9117	0	535	0.0455	-23.3454
0.9217	0	535	0.046	-23.3454
0.9318	0	535	0.0465	-24.1579
0.9418	0	535	0.047	-23.9704
0.9518	0	535	0.0475	-23.8141
0.9618	0	535	0.048	-23.6579
0.9718	0	535	0.0485	-23.6266
0.9819	0	535	0.049	-25.1267
0.9919	0	535	0.0495	-24.3454
1.0019	0	535	0.05	-25.6268
1.0119	0	535	0.0505	-24.3142
1.0219	0	535	0.051	-23.8767
1.0319	0	535	0.0515	-25.4393
1.042	0	535	0.052	-24.6892
1.052	0	535	0.0525	-25.033
1.062	0	535	0.053	-25.5643
1.072	0	535	0.0535	-24.4079
1.082	0	535	0.054	-25.533
1.0921	0	535	0.0545	-24.9392
1.1021	0	535	0.055	-25.1892
1.1121	0	535	0.0555	-24.5954
1.1221	0	535	0.056	-24.9392
1.1321	0	535	0.0565	-24.9392
1.1422	0	535	0.057	-24.1892
1.1522	0	535	0.0575	-25.6893
1.1622	0	535	0.058	-24.8455
1.1722	0	535	0.0585	-26.6268
1.1822	0	535	0.059	-25.5018
1.1922	0	535	0.0595	-26.4393
1.2023	0	535	0.06	-25.5955
1.2123	0	535	0.0605	-25.4705
1.2223	0	535	0.061	-25.9705
1.2323	0	535	0.0615	-25.783
1.2423	0	535	0.062	-26.1581
1.2524	0	535	0.0625	-25.5955
1.2624	0	535	0.063	-26.1268
1.2724	0	535	0.0635	-24.9392
1.2824	0	535	0.064	-26.8769
1.2924	0	535	0.0645	-24.8455
1.3025	0	535	0.065	-27.5019
1.3125	0	535	0.0655	-25.9393
1.3225	0	535	0.066	-26.7519
1.3325	0	535	0.0665	-27.1894
1.3425	0	535	0.067	-25.8455
1.3526	0	535	0.0675	-26.9706
1.3626	0	535	0.068	-26.5643
1.3726	0	535	0.0685	-27.1894
1.3826	0	535	0.069	-24.4392
1.3926	0	535	0.0695	-27.0019
1.4026	0	535	0.07	-25.7205
1.4127	0	535	0.0705	-26.7831
1.4227	0	535	0.071	-26.3143
1.4327	0	535	0.0715	-26.9706
1.4427	0	535	0.072	-27.1894
1.4527	0	535	0.0725	-26.1581
1.4628	0	535	0.073	-28.252
1.4728	0	535	0.0735	-26.4081
1.4828	0	535	0.074	-26.0955
1.4928	0	535	0.0745	-27.1269
1.5028	0	535	0.075	-27.6582
1.5129	0	535	0.0755	-26.3456
1.5229	0	535	0.076	-25.658
1.5329	0	535	0.0765	-26.2518
1.5429	0	535	0.077	-27.3456
1.5529	0	535	0.0775	-27.4394
1.5629	0	535	0.078	-26.0955
1.573	0	535	0.0785	-27.3456
1.583	0	535	0.079	-28.1895
1.593	0	535	0.0795	-25.5643
1.603	0	535	0.08	-25.8143
1.613	0	535	0.0805	-27.3456
1.6231	0	535	0.081	-27.1894
1.6331	0	535	0.0815	-25.6893
1.6431	0	535	0.082	-26.3456
1.6531	0	535	0.0825	-27.4394
1.6631	0	535	0.083	-26.8144
1.6732	0	535	0.0835	-27.7207
1.6832	0	535	0.084	-26.9081
1.6932	0	535	0.0845	-28.0644
1.7032	0	535	0.085	-26.6581
1.7132	0	535	0.0855	-27.1269
1.7232	0	535	0.086	-27.2831
1.7333	0	535	0.0865	-26.5018
1.7433	0	535	0.087	-28.3457
1.7533	0	535	0.0875	-25.5018
1.7633	0	535	0.088	-28.377
1.7733	0	535	0.0885	-27.1894
1.7834	0	535	0.089	-26.5331
1.7934	0	535	0.0895	-27.6269
1.8034	0	535	0.09	-26.9081
1.8134	0	535	0.0905	-28.3145
1.8234	0	535	0.091	-26.3768
1.8335	0	535	0.0915	-29.2833
1.8435	0	535	0.092	-26.4393
1.8535	0	535	0.0925	-28.3457
1.8635	0	535	0.093	-26.8144
1.8735	0	535	0.0935	-28.2832
1.8836	0	535	0.094	-26.5018
1.8936	0	535	0.0945	-28.3145
1.9036	0	535	0.095	-27.6894
1.9136	0	535	0.0955	-27.8144
1.9236	0	535	0.096	-27.5957
1.9336	0	535	0.0965	-28.5957
1.9437	0	535	0.097	-26.8456
1.9537	0	535	0.0975	-26.5956
1.9637	0	535	0.098	-28.4395
1.9737	0	535	0.0985	-27.2519
1.9837	0	535	0.099	-27.6269
1.9938	0	535	0.0995	-27.7207
2.0038	0	535	0.1	-27.0019
2.0138	0	535	0.1005	-28.0019
2.0238	0	535	0.101	-28.1269
2.0338	0	535	0.1015	-26.8769
2.0439	0	535	0.102	-28.5332
2.0539	0	535	0.1025	-28.5332
2.0639	0	535	0.103	-27.6269
2.0739	0	535	0.1035	-27.4081
2.0839	0	535	0.104	-27.1581
2.0939	0	535	0.1045	-27.0956
2.104	0	535	0.105	-27.8769
2.114	0	535	0.1055	-28.377
2.124	0	535	0.106	-28.0332
2.134	0	535	0.1065	-28.6895
2.144	0	535	0.107	-27.9394
2.1541	0	535	0.1075	-27.3144
2.1641	0	535	0.108	-29.1895
2.1741	0	535	0.1085	-27.0956
2.1841	0	535	0.109	-28.1895
2.1941	0	535	0.1095	-28.0019
2.2042	0	535	0.11	-27.6894
2.2142	0	535	0.1105	-28.0644
2.2242	0	535	0.111	-28.0019
2.2342	0	535	0.1115	-28.1895
2.2442	0	535	0.112	-29.002
2.2543	0	535	0.1125	-27.6894
2.2643	0	535	0.113	-27.7207
2.2743	0	535	0.1135	-28.1269
2.2843	0	535	0.114	-26.3143
2.2943	0	535	0.1145	-29.502
2.3043	0	535	0.115	-26.6893
2.3144	0	535	0.1155	-30.2833
2.3244	0	535	0.116	-27.4394
2.3344	0	535	0.1165	-28.1895
2.3444	0	535	0.117	-28.0332
2.3544	0	535	0.1175	-28.2832
2.3645	0	535	0.118	-28.1895
2.3745	0	535	0.1185	-28.4707
2.3845	0	535	0.119	-29.3458
2.3945	0	535	0.1195	-27.0956
2.4045	0	535	0.12	-28.5645
2.4146	0	535	0.1205	-27.3144
2.4246	0	535	0.121	-28.6582
2.4346	0	535	0.1215	-27.9707
2.4446	0	535	0.122	-28.5332
2.4546	0	535	0.1225	-27.3456
2.4646	0	535	0.123	-26.8456
2.4747	0	535	0.1235	-28.5645
2.4847	0	535	0.124	-28.5332
2.4947	0	535	0.1245	-27.5957
2.5047	0	535	0.125	-29.0958
2.5147	0	535	0.1255	-28.0957
2.5248	0	535	0.126	-28.6895
2.5348	0	535	0.1265	-28.6895
2.5448	0	535	0.127	-28.1582
2.5548	0	535	0.1275	-28.1895
2.5648	0	535	0.128	-27.8769
2.5749	0	535	0.1285	-28.4082
2.5849	0	535	0.129	-27.3144
2.5949	0	535	0.1295	-28.2832
2.6049	0	535	0.13	-27.5331
2.6149	0	535	0.1305	-28.9707
2.6249	0	535	0.131	-28.1269
2.635	0	535	0.1315	-28.1582
2.645	0	535	0.132	-27.7832
2.655	0	535	0.1325	-28.1895
2.665	0	535	0.133	-28.0957
2.675	0	535	0.1335	-27.6582
2.6851	0	535	0.134	-27.8144
2.6951	0	535	0.1345	-27.7207
2.7051	0	535	0.135	-28.3145
2.7151	0	535	0.1355	-27.6269
2.7251	0	535	0.136	-28.2832
2.7352	0	535	0.1365	-27.0956
2.7452	0	535	0.137	-27.5957
2.7552	0	535	0.1375	-28.3457
2.7652	0	535	0.138	-26.8144
2.7752	0	535	0.1385	-29.1583
2.7853	0	535	0.139	-25.908
2.7953	0	535	0.1395	-29.2833
2.8053	0	535	0.14	-28.3145
2.8153	0	535	0.1405	-27.5957
2.8253	0	535	0.141	-28.9082
2.8353	0	535	0.1415	-26.7831
2.8454	0	535	0.142	-28.4082
2.8554	0	535	0.1425	-25.8143
2.8654	0	535	0.143	-29.5645
2.8754	0	535	0.1435	-27.1894
2.8854	0	535	0.144	-29.8146
2.8955	0	535	0.1445	-27.1894
2.9055	0	535	0.145	-29.5645
2.9155	0	535	0.1455	-28.6895
2.9255	0	535	0.146	-28.0957
2.9355	0	535	0.1465	-28.627
2.9456	0	535	0.147	-28.377
2.9556	0	535	0.1475	-28.877
2.9656	0	535	0.148	-28.8457
2.9756	0	535	0.1485	-27.9082
2.9856	0	535	0.149	-28.1269
2.9956	0	535	0.1495	-29.1895
3.0057	0	535	0.15	-28.502
3.0157	0	535	0.1505	-27.8769
3.0257	0	535	0.151	-28.377
3.0357	0	535	0.1515	-27.8769
3.0457	0	535	0.152	-28.0644
3.0558	0	535	0.1525	-28.8145
3.0658	0	535	0.153	-28.1895
3.0758	0	535	0.1535	-28.252
3.0858	0	535	0.154	-28.1582
3.0958	0	535	0.1545	-28.377
3.1059	0	535	0.155	-26.8769
3.1159	0	535	0.1555	-27.4706
3.1259	0	535	0.156	-28.4082
3.1359	0	535	0.1565	-28.1269
3.1459	0	535	0.157	-27.3769
3.156	0	535	0.1575	-28.1895
3.166	0	535	0.158	-28.9707
3.176	0	535	0.1585	-28.4395
3.186	0	535	0.159	-29.252
3.196	0	535	0.1595	-28.5645
3.206	0	535	0.16	-28.1895
3.2161	0	535	0.1605	-28.3457
3.2261	0	535	0.161	-28.877
3.2361	0	535	0.1615	-28.502
3.2461	0	535	0.162	-29.7521
3.2561	0	535	0.1625	-27.9394
3.2662	0	535	0.163	-28.0332
3.2762	0	535	0.1635	-29.4083
3.2862	0	535	0.164	-27.0019
3.2962	0	535	0.1645	-29.252
3.3062	0	535	0.165	-27.1269
3.3163	0	535	0.1655	-30.1896
3.3263	0	535	0.166	-26.1893
3.3363	0	535	0.1665	-29.5333
3.3463	0	535	0.167	-26.033
3.3563	0	535	0.1675	-29.9708
3.3663	0	535	0.168	-28.0019
3.3764	0	535	0.1685	-28.502
3.3864	0	535	0.169	-27.8769
3.3964	0	535	0.1695	-27.4394
3.4064	0	535	0.17	-28.0332
3.4164	0	535	0.1705	-28.8145
3.4265	0	535	0.171	-27.9082
3.4365	0	535	0.1715	-27.7519
3.4465	0	535	0.172	-28.5645
3.4565	0	535	0.1725	-28.5332
3.4665	0	535	0.173	-28.3457
3.4766	0	535	0.1735	-28.1269
3.4866	0	535	0.174	-27.0644
3.4966	0	535	0.1745	-28.0332
3.5066	0	535	0.175	-28.1895
3.5166	0	535	0.1755	-28.3457
3.5266	0	535	0.176	-27.8457
3.5367	0	535	0.1765	-28.1895
3.5467	0	535	0.177	-29.002
3.5567	0	535	0.1775	-28.0957
3.5667	0	535	0.178	-28.0332
3.5767	0	535	0.1785	-29.2208
3.5868	0	535	0.179	-28.627
3.5968	0	535	0.1795	-28.5645
3.6068	0	535	0.18	-27.7519
3.6168	0	535	0.1805	-28.877
3.6268	0	535	0.181	-27.9394
3.6369	0	535	0.1815	-28.4082
3.6469	0	535	0.182	-27.4081
3.6569	0	535	0.1825	-27.4706
3.6669	0	535	0.183	-27.7832
3.6769	0	535	0.1835	-28.9707
3.687	0	535	0.184	-27.5644
3.697	0	535	0.1845	-28.7832
3.707	0	535	0.185	-28.1895
3.717	0	535	0.1855	-28.0019
3.727	0	535	0.186	-29.5333
3.737	0	535	0.1865	-27.6582
3.7471	0	535	0.187	-29.4395
3.7571	0	535	0.1875	-27.3144
3.7671	0	535	0.188	-28.9395
3.7771	0	535	0.1885	-28.7207
3.7871	0	535	0.189	-29.7833
3.7972	0	535	0.1895	-28.877
3.8072	0	535	0.19	-28.6895
3.8172	0	535	0.1905	-27.9394
3.8272	0	535	0.191	-27.1269
3.8372	0	535	0.1915	-30.0958
3.8473	0	535	0.192	-27.2831
3.8573	0	535	0.1925	-30.0958
3.8673	0	535	0.193	-28.5332
3.8773	0	535	0.1935	-29.6896
3.8873	0	535	0.194	-27.9082
3.8973	0	535	0.1945	-29.5333
3.9074	0	535	0.195	-28.5957
3.9174	0	535	0.1955	-28.5645
3.9274	0	535	0.196	-28.877
3.9374	0	535	0.1965	-29.6271
3.9474	0	535	0.197	-29.7208
3.9575	0	535	0.1975	-29.1895
3.9675	0	535	0.198	-28.0332
3.9775	0	535	0.1985	-27.9394
3.9875	0	535	0.199	-29.2833
3.9975	0	535	0.1995	-28.3457
4.0076	0	535	0.2	-29.4083
4.0176	0	535	0.2005	-28.7832
4.0276	0	535	0.201	-29.127
4.0376	0	535	0.2015	-28.3145
4.0476	0	535	0.202	-29.8146
4.0577	0	535	0.2025	-27.9707
4.0677	0	535	0.203	-28.0332
4.0777	0	535	0.2035	-28.7207
4.0877	0	535	0.204	-28.9395
4.0977	0	535	0.2045	-29.3145
4.1077	0	535	0.205	-28.9707
4.1178	0	535	0.2055	-28.7832
4.1278	0	535	0.206	-28.627
4.1378	0	535	0.2065	-29.2833
4.1478	0	535	0.207	-28.9082
4.1578	0	535	0.2075	-30.2833
4.1679	0	535	0.208	-28.877
4.1779	0	535	0.2085	-28.8145
4.1879	0	535	0.209	-28.0957
4.1979	0	535	0.2095	-27.5644
4.2079	0	535	0.21	-29.2833
4.218	0	535	0.2105	-28.5645
4.228	0	535	0.211	-28.7832
4.238	0	535	0.2115	-29.5958
4.248	0	535	0.212	-30.2521
4.258	0	535	0.2125	-27.5957
4.268	0	535	0.213	-30.4396
4.2781	0	535	0.2135	-28.1895
4.2881	0	535	0.214	-29.1583
4.2981	0	535	0.2145	-27.0019
4.3081	0	535	0.215	-30.1271
4.3181	0	535	0.2155	-28.0332
4.3282	0	535	0.216	-28.252
4.3382	0	535	0.2165	-29.3458
4.3482	0	535	0.217	-26.6268
4.3582	0	535	0.2175	-28.1895
4.3682	0	535	0.218	-28.752
4.3783	0	535	0.2185	-28.9707
4.3883	0	535	0.219	-27.3144
4.3983	0	535	0.2195	-29.502
4.4083	0	535	0.22	-27.8144
4.4183	0	535	0.2205	-28.4082
4.4284	0	535	0.221	-28.4082
4.4384	0	535	0.2215	-27.8144
4.4484	0	535	0.222	-27.7832
4.4584	0	535	0.2225	-27.4394
4.4684	0	535	0.223	-27.2519
4.4784	0	535	0.2235	-26.6893
4.4885	0	535	0.224	-27.9082
4.4985	0	535	0.2245	-27.7207
4.5085	0	535	0.225	-27.6894
4.5185	0	535	0.2255	-27.6894
4.5285	0	535	0.226	-27.1894
4.5386	0	535	0.2265	-27.6894
4.5486	0	535	0.227	-28.1269
4.5586	0	535	0.2275	-27.5331
4.5686	0	535	0.228	-27.5957
4.5786	0	535	0.2285	-28.0957
4.5887	0	535	0.229	-28.5957
4.5987	0	535	0.2295	-28.4082
4.6087	0	535	0.23	-28.8457
4.6187	0	535	0.2305	-28.1895
4.6287	0	535	0.231	-29.4083
4.6387	0	535	0.2315	-28.5957
4.6488	0	535	0.232	-26.4706
4.6588	0	535	0.2325	-28.1582
4.6688	0	535	0.233	-27.5644
4.6788	0	535	0.2335	-28.3457
4.6888	0	535	0.234	-28.6895
4.6989	0	535	0.2345	-27.8457
4.7089	0	535	0.235	-28.752
4.7189	0	535	0.2355	-28.5957
4.7289	0	535	0.236	-28.3145
4.7389	0	535	0.2365	-27.7207
4.749	0	535	0.237	-28.6895
4.759	0	535	0.2375	-28.0332
4.769	0	535	0.238	-28.1895
4.779	0	535	0.2385	-27.0644
4.789	0	535	0.239	-29.4708
4.799	0	535	0.2395	-28.0019
4.8091	0	535	0.24	-29.377
4.8191	0	535	0.2405	-29.9396
4.8291	0	535	0.241	-27.0331
4.8391	0	535	0.2415	-29.4083
4.8491	0	535	0.242	-26.033
4.8592	0	535	0.2425	-29.002
4.8692	0	535	0.243	-27.7832
4.8792	0	535	0.2435	-29.8771
4.8892	0	535	0.244	-28.0644
4.8992	0	535	0.2445	-28.1269
4.9093	0	535	0.245	-27.8769
4.9193	0	535	0.2455	-27.3456
4.9293	0	535	0.246	-27.9082
4.9393	0	535	0.2465	-28.6582
4.9493	0	535	0.247	-28.502
4.9594	0	535	0.2475	-28.6582
4.9694	0	535	0.248	-28.4395
4.9794	0	535	0.2485	-28.7832
4.9894	0	535	0.249	-28.4082
4.9994	0	535	0.2495	-28.1895
5.0094	0	535	0.25	-29.1895
5.0195	0	535	0.2505	-28.8457
5.0295	0	535	0.251	-29.0645
5.0395	0	535	0.2515	-27.4081
5.0495	0	535	0.252	-29.1895
5.0595	0	535	0.2525	-28.752
5.0696	0	535	0.253	-28.252
5.0796	0	535	0.2535	-28.3457
5.0896	0	535	0.254	-28.627
5.0996	0	535	0.2545	-27.3769
5.1096	0	535	0.255	-27.8457
5.1197	0	535	0.2555	-27.8144
5.1297	0	535	0.256	-28.1895
5.1397	0	535	0.2565	-29.6583
5.1497	0	535	0.257	-28.1269
5.1597	0	535	0.2575	-28.3145
5.1697	0	535	0.258	-28.4082
5.1798	0	535	0.2585	-28.5957
5.1898	0	535	0.259	-28.7832
5.1998	0	535	0.2595	-28.0019
5.2098	0	535	0.26	-29.0645
5.2198	0	535	0.2605	-28.1895
5.2299	0	535	0.261	-28.8457
5.2399	0	535	0.2615	-27.9082
5.2499	0	535	0.262	-27.8457
5.2599	0	535	0.2625	-27.3769
5.2699	0	535	0.263	-27.5019
5.28	0	535	0.2635	-28.0957
5.29	0	535	0.264	-26.5956
5.3	0	535	0.2645	-29.3145
5.31	0	535	0.265	-27.5019
5.32	0	535	0.2655	-29.127
5.3301	0	535	0.266	-27.1894
5.3401	0	535	0.2665	-29.7521
5.3501	0	535	0.267	-26.4393
5.3601	0	535	0.2675	-28.6895
5.3701	0	535	0.268	-29.002
5.3801	0	535	0.2685	-27.5644
5.3902	0	535	0.269	-29.1895
5.4002	0	535	0.2695	-27.1269
5.4102	0	535	0.27	-29.502
5.4202	0	535	0.2705	-27.8769
5.4302	0	535	0.271	-28.5332
5.4403	0	535	0.2715	-27.6894
5.4503	0	535	0.272	-28.1895
5.4603	0	535	0.2725	-27.9394
5.4703	0	535	0.273	-28.1895
5.4803	0	535	0.2735	-28.1269
5.4904	0	535	0.274	-27.7519
5.5004	0	535	0.2745	-28.1895
5.5104	0	535	0.275	-28.377
5.5204	0	535	0.2755	-29.002
5.5304	0	535	0.276	-27.9394
5.5404	0	535	0.2765	-28.4395
5.5505	0	535	0.277	-26.7831
5.5605	0	535	0.2775	-28.5957
5.5705	0	535	0.278	-28.1895
5.5805	0	535	0.2785	-28.4707
5.5905	0	535	0.279	-27.9082
5.6006	0	535	0.2795	-27.5957
5.6106	0	535	0.28	-28.4082
5.6206	0	535	0.2805	-27.4706
5.6306	0	535	0.281	-28.8145
5.6406	0	535	0.2815	-27.0956
5.6507	0	535	0.282	-28.5645
5.6607	0	535	0.2825	-28.1582
5.6707	0	535	0.283	-27.8144
5.6807	0	535	0.2835	-28.377
5.6907	0	535	0.284	-29.1583
5.7007	0	535	0.2845	-28.252
5.7108	0	535	0.285	-28.5332
5.7208	0	535	0.2855	-28.1269
5.7308	0	535	0.286	-27.1269
5.7408	0	535	0.2865	-28.3145
5.7508	0	535	0.287	-28.6895
5.7609	0	535	0.2875	-29.2833
5.7709	0	535	0.288	-28.6582
5.7809	0	535	0.2885	-28.752
5.7909	0	535	0.289	-28.9707
5.8009	0	535	0.2895	-28.252
5.811	0	535	0.29	-27.9082
5.821	0	535	0.2905	-27.5957
5.831	0	535	0.291	-29.7833
5.841	0	535	0.2915	-27.9394
5.851	0	535	0.292	-29.3458
5.8611	0	535	0.2925	-26.6893
5.8711	0	535	0.293	-30.5021
5.8811	0	535	0.2935	-28.4082
5.8911	0	535	0.294	-29.8771
5.9011	0	535	0.2945	-27.7519
5.9111	0	535	0.295	-29.5645
5.9212	0	535	0.2955	-29.5333
5.9312	0	535	0.296	-29.0645
5.9412	0	535	0.2965	-28.9707
5.9512	0	535	0.297	-28.252
5.9612	0	535	0.2975	-28.4707
5.9713	0	535	0.298	-28.3145
5.9813	0	535	0.2985	-28.9082
5.9913	0	535	0.299	-29.4083
6.0013	0	535	0.2995	-28.377
6.0113	0	535	0.3	-29.5645
6.0214	0	535	0.3005	-29.1583
6.0314	0	535	0.301	-29.0645
6.0414	0	535	0.3015	-29.502
6.0514	0	535	0.302	-27.6582
6.0614	0	535	0.3025	-28.752
6.0714	0	535	0.303	-28.9082
6.0815	0	535	0.3035	-29.6896
6.0915	0	535	0.304	-29.7208
6.1015	0	535	0.3045	-29.0645
6.1115	0	535	0.305	-29.252
6.1215	0	535	0.3055	-29.002
6.1316	0	535	0.306	-29.0332
6.1416	0	535	0.3065	-29.6583
6.1516	0	535	0.307	-29.0645
6.1616	0	535	0.3075	-29.0645
6.1716	0	535	0.308	-28.2832
6.1817	0	535	0.3085	-29.4708
6.1917	0	535	0.309	-28.6895
6.2017	0	535	0.3095	-28.5645
6.2117	0	535	0.31	-29.3145
6.2217	0	535	0.3105	-29.2833
6.2318	0	535	0.311	-28.2832
6.2418	0	535	0.3115	-29.3145
6.2518	0	535	0.312	-27.9707
6.2618	0	535	0.3125	-28.6582
6.2718	0	535	0.313	-29.3145
6.2818	0	535	0.3135	-28.3457
6.2919	0	535	0.314	-30.3146
6.3019	0	535	0.3145	-27.7832
6.3119	0	535	0.315	-30.1896
6.3219	0	535	0.3155	-26.9706
6.3319	0	535	0.316	-29.6896
6.342	0	535	0.3165	-29.0958
6.352	0	535	0.317	-27.6269
6.362	0	535	0.3175	-30.2521
6.372	0	535	0.318	-27.3144
6.382	0	535	0.3185	-28.4707
6.3921	0	535	0.319	-27.0019
6.4021	0	535	0.3195	-30.3771
6.4121	0	535	0.32	-28.0332
6.4221	0	535	0.3205	-29.127
6.4321	0	535	0.321	-28.377
6.4421	0	535	0.3215	-29.3458
6.4522	0	535	0.322	-28.9395
6.4622	0	535	0.3225	-29.0645
6.4722	0	535	0.323	-28.5957
6.4822	0	535	0.3235	-28.1895
6.4922	0	535	0.324	-29.4395
6.5023	0	535	0.3245	-27.9707
6.5123	0	535	0.325	-28.1895
6.5223	0	535	0.3255	-28.6582
6.5323	0	535	0.326	-28.752
6.5423	0	535	0.3265	-29.0332
6.5524	0	535	0.327	-28.1269
6.5624	0	535	0.3275	-29.002
6.5724	0	535	0.328	-29.377
6.5824	0	535	0.3285	-28.4395
6.5924	0	535	0.329	-28.7832
6.6024	0	535	0.3295	-29.3145
6.6125	0	535	0.33	-28.2832
6.6225	0	535	0.3305	-30.1896
6.6325	0	535	0.331	-28.1895
6.6425	0	535	0.3315	-28.5957
6.6525	0	535	0.332	-27.9394
6.6626	0	535	0.3325	-28.7832
6.6726	0	535	0.333	-28.1582
6.6826	0	535	0.3335	-28.8145
6.6926	0	535	0.334	-28.6582
6.7026	0	535	0.3345	-28.1895
6.7127	0	535	0.335	-29.8458
6.7227	0	535	0.3355	-28.627
6.7327	0	535	0.336	-28.6895
6.7427	0	535	0.3365	-28.3145
6.7527	0	535	0.337	-27.8769
6.7628	0	535	0.3375	-28.9395
6.7728	0	535	0.338	-29.002
6.7828	0	535	0.3385	-28.877
6.7928	0	535	0.339	-29.9708
6.8028	0	535	0.3395	-29.0645
6.8128	0	535	0.34	-27.5331
6.8229	0	535	0.3405	-29.5333
6.8329	0	535	0.341	-27.1269
6.8429	0	535	0.3415	-30.3771
6.8529	0	535	0.342	-27.9394
6.8629	0	535	0.3425	-31.0334
6.873	0	535	0.343	-27.3456
6.883	0	535	0.3435	-29.6271
6.893	0	535	0.344	-28.4707
6.903	0	535	0.3445	-29.6271
6.913	0	535	0.345	-28.752
6.9231	0	535	0.3455	-29.0645
6.9331	0	535	0.346	-28.6582
6.9431	0	535	0.3465	-27.8769
6.9531	0	535	0.347	-27.6894
6.9631	0	535	0.3475	-29.0958
6.9731	0	535	0.348	-28.502
6.9832	0	535	0.3485	-28.8457
6.9932	0	535	0.349	-29.0645
7.0032	0	535	0.3495	-28.752
7.0132	0	535	0.35	-28.377
7.0232	0	535	0.3505	-27.8769
7.0333	0	535	0.351	-28.5332
7.0433	0	535	0.3515	-28.877
7.0533	0	535	0.352	-28.9082
7.0633	0	535	0.3525	-29.4708
7.0733	0	535	0.353	-27.7519
7.0834	0	535	0.3535	-28.6895
7.0934	0	535	0.354	-29.1895
7.1034	0	535	0.3545	-29.5958
7.1134	0	535	0.355	-28.4395
7.1234	0	535	0.3555	-29.3145
7.1335	0	535	0.356	-28.1582
7.1435	0	535	0.3565	-28.877
7.1535	0	535	0.357	-28.627
7.1635	0	535	0.3575	-29.3145
7.1735	0	535	0.358	-29.3458
7.1835	0	535	0.3585	-27.6269
7.1936	0	535	0.359	-29.3145
7.2036	0	535	0.3595	-27.6269
7.2136	0	535	0.36	-28.8145
7.2236	0	535	0.3605	-28.1582
7.2336	0	535	0.361	-29.4708
7.2437	0	535	0.3615	-28.0332
7.2537	0	535	0.362	-29.0958
7.2637	0	535	0.3625	-28.0957
7.2737	0	535	0.363	-28.877
7.2837	0	535	0.3635	-28.1582
7.2938	0	535	0.364	-28.0957
7.3038	0	535	0.3645	-30.0021
7.3138	0	535	0.365	-27.3144
7.3238	0	535	0.3655	-29.6271
7.3338	0	535	0.366	-26.8456
7.3438	0	535	0.3665	-30.3146
7.3539	0	535	0.367	-27.5019
7.3639	0	535	0.3675	-28.9395
7.3739	0	535	0.368	-28.6895
7.3839	0	535	0.3685	-28.1895
7.3939	0	535	0.369	-29.5958
7.404	0	535	0.3695	-27.2831
7.414	0	535	0.37	-30.2833
7.424	0	535	0.3705	-28.8145
7.434	0	535	0.371	-29.502
7.444	0	535	0.3715	-28.4395
7.4541	0	535	0.372	-27.6894
7.4641	0	535	0.3725	-28.627
7.4741	0	535	0.373	-29.3145
7.4841	0	535	0.3735	-29.5958
7.4941	0	535	0.374	-29.1583
7.5041	0	535	0.3745	-28.752
7.5142	0	535	0.375	-29.0645
7.5242	0	535	0.3755	-28.752
7.5342	0	535	0.376	-28.1895
7.5442	0	535	0.3765	-28.877
7.5542	0	535	0.377	-28.0957
7.5643	0	535	0.3775	-28.877
7.5743	0	535	0.378	-28.0332
7.5843	0	535	0.3785	-27.8457
7.5943	0	535	0.379	-28.0019
7.6043	0	535	0.3795	-27.3456
7.6144	0	535	0.38	-28.3457
7.6244	0	535	0.3805	-26.9706
7.6344	0	535	0.381	-28.502
7.6444	0	535	0.3815	-27.5019
7.6544	0	535	0.382	-29.6896
7.6645	0	535	0.3825	-28.0019
7.6745	0	535	0.383	-28.1895
7.6845	0	535	0.3835	-27.9394
7.6945	0	535	0.384	-29.002
7.7045	0	535	0.3845	-28.0019
7.7145	0	535	0.385	-28.3145
7.7246	0	535	0.3855	-27.8457
7.7346	0	535	0.386	-29.127
7.7446	0	535	0.3865	-27.7519
7.7546	0	535	0.387	-28.1582
7.7646	0	535	0.3875	-28.6582
7.7747	0	535	0.388	-28.3457
7.7847	0	535	0.3885	-28.8457
7.7947	0	535	0.389	-28.0019
7.8047	0	535	0.3895	-28.1895
7.8147	0	535	0.39	-29.3458
7.8248	0	535	0.3905	-26.8769
7.8348	0	535	0.391	-29.3458
7.8448	0	535	0.3915	-27.6582
7.8548	0	535	0.392	-29.1895
7.8648	0	535	0.3925	-26.8144
7.8748	0	535	0.393	-30.1583
7.8849	0	535	0.3935	-27.5644
7.8949	0	535	0.394	-29.3458
7.9049	0	535	0.3945	-27.5331
7.9149	0	535	0.395	-28.1582
7.9249	0	535	0.3955	-29.0332
7.935	0	535	0.396	-26.6581
7.945	0	535	0.3965	-29.3145
7.955	0	535	0.397	-28.6895
7.965	0	535	0.3975	-28.1582
7.975	0	535	0.398	-29.1583
7.9851	0	535	0.3985	-27.7207
7.9951	0	535	0.399	-29.2833
8.0051	0	535	0.3995	-28.2207
8.0151	0	535	0.4	-28.0332
8.0251	0	535	0.4005	-28.377
8.0352	0	535	0.401	-28.0019
8.0452	0	535	0.4015	-28.4707
8.0552	0	535	0.402	-27.4081
8.0652	0	535	0.4025	-29.502
8.0752	0	535	0.403	-28.4082
8.0852	0	535	0.4035	-28.6895
8.0953	0	535	0.404	-28.5332
8.1053	0	535	0.4045	-28.5332
8.1153	0	535	0.405	-29.127
8.1253	0	535	0.4055	-28.0957
8.1353	0	535	0.406	-28.0957
8.1454	0	535	0.4065	-29.1895
8.1554	0	535	0.407	-27.3769
8.1654	0	535	0.4075	-28.0019
8.1754	0	535	0.408	-28.1269
8.1854	0	535	0.4085	-28.3457
8.1955	0	535	0.409	-28.0332
8.2055	0	535	0.4095	-28.9707
8.2155	0	535	0.41	-28.1895
8.2255	0	535	0.4105	-28.5645
8.2355	0	535	0.411	-28.7832
8.2455	0	535	0.4115	-29.1895
8.2556	0	535	0.412	-28.0332
8.2656	0	535	0.4125	-27.7519
8.2756	0	535	0.413	-28.377
8.2856	0	535	0.4135	-28.3457
8.2956	0	535	0.414	-28.2832
8.3057	0	535	0.4145	-29.1895
8.3157	0	535	0.415	-29.6583
8.3257	0	535	0.4155	-27.4706
8.3357	0	535	0.416	-29.6271
8.3457	0	535	0.4165	-27.1894
8.3558	0	535	0.417	-29.4083
8.3658	0	535	0.4175	-26.5956
8.3758	0	535	0.418	-29.3145
8.3858	0	535	0.4185	-26.5018
8.3958	0	535	0.419	-28.0644
8.4059	0	535	0.4195	-28.3145
8.4159	0	535	0.42	-27.5957
8.4259	0	535	0.4205	-29.3145
8.4359	0	535	0.421	-27.4081
8.4459	0	535	0.4215	-30.0958
8.4559	0	535	0.422	-27.5019
8.466	0	535	0.4225	-28.5332
8.476	0	535	0.423	-28.4707
8.486	0	535	0.4235	-27.5331
8.496	0	535	0.424	-27.9082
8.506	0	535	0.4245	-28.5645
8.5161	0	535	0.425	-27.7519
8.5261	0	535	0.4255	-28.0332
8.5361	0	535	0.426	-28.6582
8.5461	0	535	0.4265	-27.7207
8.5561	0	535	0.427	-29.3145
8.5662	0	535	0.4275	-28.8457
8.5762	0	535	0.428	-28.1582
8.5862	0	535	0.4285	-27.7832
8.5962	0	535	0.429	-28.4395
8.6062	0	535	0.4295	-27.1894
8.6162	0	535	0.43	-28.1895
8.6263	0	535	0.4305	-28.6582
8.6363	0	535	0.431	-28.1582
8.6463	0	535	0.4315	-28.627
8.6563	0	535	0.432	-28.3457
8.6663	0	535	0.4325	-28.502
8.6764	0	535	0.433	-27.1581
8.6864	0	535	0.4335	-27.3456
8.6964	0	535	0.434	-27.6269
8.7064	0	535	0.4345	-28.0644
8.7164	0	535	0.435	-28.8145
8.7265	0	535	0.4355	-27.9082
8.7365	0	535	0.436	-27.8769
8.7465	0	535	0.4365	-28.0332
8.7565	0	535	0.437	-28.0644
8.7665	0	535	0.4375	-28.2832
8.7765	0	535	0.438	-28.377
8.7866	0	535	0.4385	-27.7519
8.7966	0	535	0.439	-28.0332
8.8066	0	535	0.4395	-27.6269
8.8166	0	535	0.44	-27.4394
8.8266	0	535	0.4405	-28.9082
8.8367	0	535	0.441	-27.7832
8.8467	0	535	0.4415	-29.1895
8.8567	0	535	0.442	-27.9707
8.8667	0	535	0.4425	-29.8771
8.8767	0	535	0.443	-25.5955
8.8868	0	535	0.4435	-30.8459
8.8968	0	535	0.444	-26.1893
8.9068	0	535	0.4445	-29.377
8.9168	0	535	0.445	-27.1581
8.9268	0	535	0.4455	-28.8457
8.9369	0	535	0.446	-26.8456
8.9469	0	535	0.4465	-28.5332
8.9569	0	535	0.447	-27.9394
8.9669	0	535	0.4475	-26.2518
8.9769	0	535	0.448	-28.9082
8.9869	0	535	0.4485	-28.502
8.997	0	535	0.449	-27.5957
9.007	0	535	0.4495	-29.0958
9.017	0	535	0.45	-26.5956
9.027	0	535	0.4505	-28.0019
9.037	0	535	0.451	-27.6894
9.0471	0	535	0.4515	-27.8144
9.0571	0	535	0.452	-27.1581
9.0671	0	535	0.4525	-28.502
9.0771	0	535	0.453	-27.8769
9.0871	0	535	0.4535	-28.4082
9.0972	0	535	0.454	-28.0332
9.1072	0	535	0.4545	-28.0332
9.1172	0	535	0.455	-28.4082
9.1272	0	535	0.4555	-27.6894
9.1372	0	535	0.456	-27.9707
9.1472	0	535	0.4565	-28.8457
9.1573	0	535	0.457	-28.6895
9.1673	0	535	0.4575	-27.7832
9.1773	0	535	0.458	-28.502
9.1873	0	535	0.4585	-28.2207
9.1973	0	535	0.459	-28.0332
9.2074	0	535	0.4595	-29.002
9.2174	0	535	0.46	-28.9395
9.2274	0	535	0.4605	-28.1895
9.2374	0	535	0.461	-28.377
9.2474	0	535	0.4615	-28.9395
9.2575	0	535	0.462	-27.4394
9.2675	0	535	0.4625	-29.3145
9.2775	0	535	0.463	-28.0644
9.2875	0	535	0.4635	-28.5957
9.2975	0	535	0.464	-27.7832
9.3076	0	535	0.4645	-29.4083
9.3176	0	535	0.465	-27.3456
9.3276	0	535	0.4655	-28.4707
9.3376	0	535	0.466	-29.1583
9.3476	0	535	0.4665	-28.1269
9.3576	0	535	0.467	-29.0958
9.3677	0	535	0.4675	-26.9706
9.3777	0	535	0.468	-30.9709
9.3877	0	535	0.4685	-26.4706
9.3977	0	535	0.469	-29.9396
9.4077	0	535	0.4695	-26.8456
9.4178	0	535	0.47	-28.4395
9.4278	0	535	0.4705	-27.7519
9.4378	0	535	0.471	-29.4708
9.4478	0	535	0.4715	-28.1895
9.4578	0	535	0.472	-27.1581
9.4679	0	535	0.4725	-29.4083
9.4779	0	535	0.473	-26.9706
9.4879	0	535	0.4735	-28.1582
9.4979	0	535	0.474	-27.3769
9.5079	0	535	0.4745	-28.877
9.5179	0	535	0.475	-28.5957
9.528	0	535	0.4755	-28.877
9.538	0	535	0.476	-27.8144
9.548	0	535	0.4765	-28.502
9.558	0	535	0.477	-27.8769
9.568	0	535	0.4775	-28.4707
9.5781	0	535	0.478	-28.4707
9.5881	0	535	0.4785	-27.8769
9.5981	0	535	0.479	-28.7207
9.6081	0	535	0.4795	-28.377
9.6181	0	535	0.48	-28.3457
9.6282	0	535	0.4805	-27.9394
9.6382	0	535	0.481	-28.0957
9.6482	0	535	0.4815	-28.4707
9.6582	0	535	0.482	-27.8457
9.6682	0	535	0.4825	-28.0957
9.6782	0	535	0.483	-28.2832
9.6883	0	535	0.4835	-27.5644
9.6983	0	535	0.484	-29.0645
9.7083	0	535	0.4845	-28.9395
9.7183	0	535	0.485	-28.627
9.7283	0	535	0.4855	-27.7832
9.7384	0	535	0.486	-27.5331
9.7484	0	535	0.4865	-28.6582
9.7584	0	535	0.487	-28.0957
9.7684	0	535	0.4875	-27.5331
9.7784	0	535	0.488	-28.1895
9.7885	0	535	0.4885	-27.6269
9.7985	0	535	0.489	-28.9395
9.8085	0	535	0.4895	-26.5643
9.8185	0	535	0.49	-28.752
9.8285	0	535	0.4905	-26.8144
9.8386	0	535	0.491	-29.502
9.8486	0	535	0.4915	-27.1581
9.8586	0	535	0.492	-29.5333
9.8686	0	535	0.4925	-26.9706
9.8786	0	535	0.493	-29.1895
9.8886	0	535	0.4935	-27.1581
9.8987	0	535	0.494	-28.752
9.9087	0	535	0.4945	-28.0332
9.9187	0	535	0.495	-26.3768
9.9287	0	535	0.4955	-29.127
9.9387	0	535	0.496	-27.4706
9.9488	0	535	0.4965	-29.002
9.9588	0	535	0.497	-27.1581
9.9688	0	535	0.4975	-28.9082
9.9788	0	535	0.498	-27.9707
9.9888	0	535	0.4985	-28.752
9.9989	0	535	0.499	-28.4395
10.0089	0	535	0.4995	-28.3457
10.0189	0	535	0.5	-27.5644
10.0289	0	535	0.5005	-28.377
10.0389	0	535	0.501	-29.4708
10.0489	0	535	0.5015	-28.627
10.059	0	535	0.502	-29.127
10.069	0	535	0.5025	-29.0645
10.079	0	535	0.503	-26.9081
10.089	0	535	0.5035	-28.1895
10.099	0	535	0.504	-27.5019
10.1091	0	535	0.5045	-27.9082
10.1191	0	535	0.505	-28.0332
10.1291	0	535	0.5055	-28.5645
10.1391	0	535	0.506	-27.5331
10.1491	0	535	0.5065	-29.002
10.1592	0	535	0.507	-29.002
10.1692	0	535	0.5075	-27.4706
10.1792	0	535	0.508	-27.5644
10.1892	0	535	0.5085	-28.6895
10.1992	0	535	0.509	-27.0331
10.2093	0	535	0.5095	-29.002
10.2193	0	535	0.51	-28.1895
10.2293	0	535	0.5105	-28.2832
10.2393	0	535	0.511	-28.502
10.2493	0	535	0.5115	-27.7519
10.2593	0	535	0.512	-27.0331
10.2694	0	535	0.5125	-28.3145
10.2794	0	535	0.513	-28.5332
10.2894	0	535	0.5135	-26.8769
10.2994	0	535	0.514	-28.9082
10.3094	0	535	0.5145	-27.9082
10.3195	0	535	0.515	-28.9395
10.3295	0	535	0.5155	-28.5957
10.3395	0	535	0.516	-28.4082
10.3495	0	535	0.5165	-27.0956
10.3595	0	535	0.517	-28.8457
10.3696	0	535	0.5175	-27.6894
10.3796	0	535	0.518	-29.1895
10.3896	0	535	0.5185	-28.2832
10.3996	0	535	0.519	-27.6582
10.4096	0	535	0.5195	-30.0333
10.4196	0	535	0.52	-27.0644
10.4297	0	535	0.5205	-29.5958
10.4397	0	535	0.521	-27.5019
10.4497	0	535	0.5215	-28.9707
10.4597	0	535	0.522	-27.1894
10.4697	0	535	0.5225	-28.877
10.4798	0	535	0.523	-27.5019
10.4898	0	535	0.5235	-28.3457
10.4998	0	535	0.524	-28.6895
10.5098	0	535	0.5245	-28.3145
10.5198	0	535	0.525	-28.3145
10.5299	0	535	0.5255	-28.0644
10.5399	0	535	0.526	-28.1895
10.5499	0	535	0.5265	-28.627
10.5599	0	535	0.527	-27.8144
10.5699	0	535	0.5275	-27.6269
10.5799	0	535	0.528	-28.1269
10.59	0	535	0.5285	-26.4706
10.6	0	535	0.529	-27.9394
10.61	0	535	0.5295	-28.5957
10.62	0	535	0.53	-27.1581
10.63	0	535	0.5305	-28.752
10.6401	0	535	0.531	-27.5957
10.6501	0	535	0.5315	-27.0019
10.6601	0	535	0.532	-28.1582
10.6701	0	535	0.5325	-27.0644
10.6801	0	535	0.533	-27.7519
10.6902	0	535	0.5335	-27.1894
10.7002	0	535	0.534	-27.8144
10.7102	0	535	0.5345	-28.7832
10.7202	0	535	0.535	-27.3456
10.7302	0	535	0.5355	-27.9394
10.7403	0	535	0.536	-28.8457
10.7503	0	535	0.5365	-27.0956
10.7603	0	535	0.537	-28.0332
10.7703	0	535	0.5375	-27.5957
10.7803	0	535	0.538	-28.1582
10.7903	0	535	0.5385	-27.7207
10.8004	0	535	0.539	-28.0332
10.8104	0	535	0.5395	-27.3769
10.8204	0	535	0.54	-28.1895
10.8304	0	535	0.5405	-26.8144
10.8404	0	535	0.541	-28.6582
10.8505	0	535	0.5415	-27.6894
10.8605	0	535	0.542	-27.9394
10.8705	0	535	0.5425	-27.1581
10.8805	0	535	0.543	-27.0956
10.8905	0	535	0.5435	-28.4395
10.9006	0	535	0.544	-25.533
10.9106	0	535	0.5445	-29.252
10.9206	0	535	0.545	-25.9393
10.9306	0	535	0.5455	-29.502
10.9406	0	535	0.546	-26.6893
10.9506	0	535	0.5465	-28.9395
10.9607	0	535	0.547	-27.2831
10.9707	0	535	0.5475	-27.9082
10.9807	0	535	0.548	-28.6582
10.9907	0	535	0.5485	-27.0956
11.0007	0	535	0.549	-27.9707
11.0108	0	535	0.5495	-28.1582
11.0208	0	535	0.55	-28.1895
11.0308	0	535	0.5505	-28.0019
11.0408	0	535	0.551	-28.4395
11.0508	0	535	0.5515	-28.3457
11.0609	0	535	0.552	-29.002
11.0709	0	535	0.5525	-27.0019
11.0809	0	535	0.553	-27.8769
11.0909	0	535	0.5535	-28.502
11.1009	0	535	0.554	-28.3457
11.111	0	535	0.5545	-29.4395
11.121	0	535	0.555	-28.1895
11.131	0	535	0.5555	-28.1895
11.141	0	535	0.556	-27.5644
11.151	0	535	0.5565	-28.4082
11.161	0	535	0.557	-28.4395
11.1711	0	535	0.5575	-28.3145
11.1811	0	535	0.558	-28.1895
11.1911	0	535	0.5585	-29.0645
11.2011	0	535	0.559	-27.0956
11.2111	0	535	0.5595	-28.1269
11.2212	0	535	0.56	-27.5019
11.2312	0	535	0.5605	-27.7207
11.2412	0	535	0.561	-27.1269
11.2512	0	535	0.5615	-28.4082
11.2612	0	535	0.562	-27.9082
11.2713	0	535	0.5625	-27.7832
11.2813	0	535	0.563	-28.3457
11.2913	0	535	0.5635	-27.8769
11.3013	0	535	0.564	-28.502
11.3113	0	535	0.5645	-27.8144
11.3213	0	535	0.565	-28.7832
11.3314	0	535	0.5655	-27.9707
11.3414	0	535	0.566	-28.1895
11.3514	0	535	0.5665	-28.5645
11.3614	0	535	0.567	-27.6269
11.3714	0	535	0.5675	-28.5645
11.3815	0	535	0.568	-26.2831
11.3915	0	535	0.5685	-29.5958
11.4015	0	535	0.569	-25.5955
11.4115	0	535	0.5695	-30.0958
11.4215	0	535	0.57	-26.3456
11.4316	0	535	0.5705	-29.1895
11.4416	0	535	0.571	-28.1269
11.4516	0	535	0.5715	-27.7832
11.4616	0	535	0.572	-27.9082
11.4716	0	535	0.5725	-27.6894
11.4816	0	535	0.573	-27.7832
11.4917	0	535	0.5735	-27.6582
11.5017	0	535	0.574	-28.5332
11.5117	0	535	0.5745	-27.9394
11.5217	0	535	0.575	-28.1895
11.5317	0	535	0.5755	-28.4395
11.5418	0	535	0.576	-28.377
11.5518	0	535	0.5765	-28.0957
11.5618	0	535	0.577	-28.1269
11.5718	0	535	0.5775	-28.0957
11.5818	0	535	0.578	-27.8769
11.5919	0	535	0.5785	-28.0957
11.6019	0	535	0.579	-28.1582
11.6119	0	535	0.5795	-28.6895
11.6219	0	535	0.58	-28.0332
11.6319	0	535	0.5805	-27.8144
11.642	0	535	0.581	-27.8769
11.652	0	535	0.5815	-28.5332
11.662	0	535	0.582	-27.9394
11.672	0	535	0.5825	-27.5331
11.682	0	535	0.583	-27.6582
11.692	0	535	0.5835	-27.7519
11.7021	0	535	0.584	-28.1895
11.7121	0	535	0.5845	-28.0019
11.7221	0	535	0.585	-27.9394
11.7321	0	535	0.5855	-27.5019
11.7421	0	535	0.586	-27.7832
11.7522	0	535	0.5865	-27.4394
11.7622	0	535	0.587	-28.0644
11.7722	0	535	0.5875	-28.627
11.7822	0	535	0.588	-27.7832
11.7922	0	535	0.5885	-26.8144
11.8023	0	535	0.589	-27.6894
11.8123	0	535	0.5895	-26.8144
11.8223	0	535	0.59	-28.4707
11.8323	0	535	0.5905	-26.7519
11.8423	0	535	0.591	-27.6894
11.8523	0	535	0.5915	-28.8145
11.8624	0	535	0.592	-28.377
11.8724	0	535	0.5925	-27.7519
11.8824	0	535	0.593	-27.3144
11.8924	0	535	0.5935	-29.9396
11.9024	0	535	0.594	-26.6581
11.9125	0	535	0.5945	-29.502
11.9225	0	535	0.595	-27.0019
11.9325	0	535	0.5955	-29.0958
11.9425	0	535	0.596	-26.8144
11.9525	0	535	0.5965	-28.4395
11.9626	0	535	0.597	-27.0644
11.9726	0	535	0.5975	-28.9395
11.9826	0	535	0.598	-27.4706
11.9926	0	535	0.5985	-28.4707
12.0026	0	535	0.599	-27.8769
12.0127	0	535	0.5995	-27.7519
12.0227	0	535	0.6	-28.502
12.0327	0	535	0.6005	-27.5331
12.0427	0	535	0.601	-28.252
12.0527	0	535	0.6015	-28.4395
12.0627	0	535	0.602	-28.6895
12.0728	0	535	0.6025	-29.1895
12.0828	0	535	0.603	-27.9394
12.0928	0	535	0.6035	-27.6894
12.1028	0	535	0.604	-28.7207
12.1128	0	535	0.6045	-28.4707
12.1229	0	535	0.605	-28.0019
12.1329	0	535	0.6055	-27.3769
12.1429	0	535	0.606	-28.1895
12.1529	0	535	0.6065	-27.7832
12.1629	0	535	0.607	-27.4706
12.173	0	535	0.6075	-27.8769
12.183	0	535	0.608	-27.4081
12.193	0	535	0.6085	-27.9707
12.203	0	535	0.609	-28.1895
12.213	0	535	0.6095	-27.8769
12.223	0	535	0.61	-28.9082
12.2331	0	535	0.6105	-27.5644
12.2431	0	535	0.611	-28.0332
12.2531	0	535	0.6115	-28.4707
12.2631	0	535	0.612	-28.0332
12.2731	0	535	0.6125	-26.7519
12.2832	0	535	0.613	-27.8144
12.2932	0	535	0.6135	-27.8144
12.3032	0	535	0.614	-27.3769
12.3132	0	535	0.6145	-26.8769
12.3232	0	535	0.615	-27.0019
12.3333	0	535	0.6155	-28.9707
12.3433	0	535	0.616	-27.0644
12.3533	0	535	0.6165	-27.8457
12.3633	0	535	0.617	-27.5957
12.3733	0	535	0.6175	-29.127
12.3834	0	535	0.618	-25.9705
12.3934	0	535	0.6185	-26.4393
12.4034	0	535	0.619	-27.6894
12.4134	0	535	0.6195	-25.8455
12.4234	0	535	0.62	-28.377
12.4334	0	535	0.6205	-26.1268
12.4435	0	535	0.621	-29.2833
12.4535	0	535	0.6215	-26.6893
12.4635	0	535	0.622	-29.0645
12.4735	0	535	0.6225	-26.3768
12.4835	0	535	0.623	-27.6894
12.4936	0	535	0.6235	-27.1894
12.5036	0	535	0.624	-27.5019
12.5136	0	535	0.6245	-28.1269
12.5236	0	535	0.625	-27.6582
12.5336	0	535	0.6255	-27.5019
12.5437	0	535	0.626	-27.5644
12.5537	0	535	0.6265	-26.8769
12.5637	0	535	0.627	-27.3456
12.5737	0	535	0.6275	-26.9081
12.5837	0	535	0.628	-27.4394
12.5937	0	535	0.6285	-27.9394
12.6038	0	535	0.629	-28.0644
12.6138	0	535	0.6295	-27.5957
12.6238	0	535	0.63	-27.5019
12.6338	0	535	0.6305	-28.5645
12.6438	0	535	0.631	-27.9082
12.6539	0	535	0.6315	-27.6269
12.6639	0	535	0.632	-27.4706
12.6739	0	535	0.6325	-27.1894
12.6839	0	535	0.633	-27.2519
12.6939	0	535	0.6335	-26.6581
12.704	0	535	0.634	-27.3456
12.714	0	535	0.6345	-28.1582
12.724	0	535	0.635	-27.8457
12.734	0	535	0.6355	-29.1583
12.744	0	535	0.636	-27.5331
12.754	0	535	0.6365	-28.377
12.7641	0	535	0.637	-26.9394
12.7741	0	535	0.6375	-27.4081
12.7841	0	535	0.638	-27.7207
12.7941	0	535	0.6385	-28.0644
12.8041	0	535	0.639	-28.1269
12.8142	0	535	0.6395	-27.0956
12.8242	0	535	0.64	-29.1895
12.8342	0	535	0.6405	-27.0644
12.8442	0	535	0.641	-28.8457
12.8542	0	535	0.6415	-27.7207
12.8643	0	535	0.642	-29.1583
12.8743	0	535	0.6425	-27.1894
12.8843	0	535	0.643	-29.127
12.8943	0	535	0.6435	-28.3145
12.9043	0	535	0.644	-29.252
12.9144	0	535	0.6445	-27.1581
12.9244	0	535	0.645	-27.8769
12.9344	0	535	0.6455	-28.0332
12.9444	0	535	0.646	-27.6269
12.9544	0	535	0.6465	-29.502
12.9644	0	535	0.647	-27.4394
12.9745	0	535	0.6475	-28.5645
12.9845	0	535	0.648	-26.7519
12.9945	0	535	0.6485	-28.4395
13.0045	0	535	0.649	-27.1581
13.0145	0	535	0.6495	-28.0957
13.0246	0	535	0.65	-28.1895
13.0346	0	535	0.6505	-27.5019
13.0446	0	535	0.651	-27.7207
13.0546	0	535	0.6515	-27.0331
13.0646	0	535	0.652	-27.9082
13.0747	0	535	0.6525	-27.3456
13.0847	0	535	0.653	-27.7207
13.0947	0	535	0.6535	-28.0957
13.1047	0	535	0.654	-27.8144
13.1147	0	535	0.6545	-28.1895
13.1247	0	535	0.655	-28.7207
13.1348	0	535	0.6555	-28.0957
13.1448	0	535	0.656	-27.5644
13.1548	0	535	0.6565	-28.5957
13.1648	0	535	0.657	-27.1894
13.1748	0	535	0.6575	-28.4082
13.1849	0	535	0.658	-27.8457
13.1949	0	535	0.6585	-27.0956
13.2049	0	535	0.659	-27.1581
13.2149	0	535	0.6595	-28.4395
13.2249	0	535	0.66	-28.3457
13.235	0	535	0.6605	-28.1895
13.245	0	535	0.661	-28.752
13.255	0	535	0.6615	-28.9395
13.265	0	535	0.662	-27.8144
13.275	0	535	0.6625	-28.0019
13.2851	0	535	0.663	-27.1581
13.2951	0	535	0.6635	-29.002
13.3051	0	535	0.664	-28.4707
13.3151	0	535	0.6645	-28.4707
13.3251	0	535	0.665	-28.5957
13.3351	0	535	0.6655	-27.9082
13.3452	0	535	0.666	-29.0958
13.3552	0	535	0.6665	-27.1269
13.3652	0	535	0.667	-28.9082
13.3752	0	535	0.6675	-27.1894
13.3852	0	535	0.668	-29.1895
13.3953	0	535	0.6685	-27.2831
13.4053	0	535	0.669	-28.0957
13.4153	0	535	0.6695	-28.3145
13.4253	0	535	0.67	-27.0331
13.4353	0	535	0.6705	-30.6271
13.4454	0	535	0.671	-26.5018
13.4554	0	535	0.6715	-29.3458
13.4654	0	535	0.672	-26.3143
13.4754	0	535	0.6725	-28.2832
13.4854	0	535	0.673	-27.1269
13.4954	0	535	0.6735	-30.0958
13.5055	0	535	0.674	-28.4707
13.5155	0	535	0.6745	-27.9082
13.5255	0	535	0.675	-28.0019
13.5355	0	535	0.6755	-27.9394
13.5455	0	535	0.676	-28.4082
13.5556	0	535	0.6765	-27.6894
13.5656	0	535	0.677	-28.0957
13.5756	0	535	0.6775	-27.5644
13.5856	0	535	0.678	-27.8769
13.5956	0	535	0.6785	-27.0956
13.6057	0	535	0.679	-27.6582
13.6157	0	535	0.6795	-27.9082
13.6257	0	535	0.68	-27.0956
13.6357	0	535	0.6805	-27.9394
13.6457	0	535	0.681	-28.5645
13.6557	0	535	0.6815	-27.5331
13.6658	0	535	0.682	-27.9707
13.6758	0	535	0.6825	-26.8456
13.6858	0	535	0.683	-28.6582
13.6958	0	535	0.6835	-27.8144
13.7058	0	535	0.684	-27.1581
13.7159	0	535	0.6845	-27.4394
13.7259	0	535	0.685	-28.7832
13.7359	0	535	0.6855	-27.8457
13.7459	0	535	0.686	-27.3769
13.7559	0	535	0.6865	-27.5019
13.766	0	535	0.687	-28.0332
13.776	0	535	0.6875	-28.0957
13.786	0	535	0.688	-28.0644
13.796	0	535	0.6885	-27.8144
13.806	0	535	0.689	-29.5333
13.8161	0	535	0.6895	-27.7519
13.8261	0	535	0.69	-27.7832
13.8361	0	535	0.6905	-28.752
13.8461	0	535	0.691	-26.2831
13.8561	0	535	0.6915	-27.9082
13.8661	0	535	0.692	-26.5331
13.8762	0	535	0.6925	-28.1582
13.8862	0	535	0.693	-27.0019
13.8962	0	535	0.6935	-29.4708
13.9062	0	535	0.694	-25.9705
13.9162	0	535	0.6945	-29.5333
13.9263	0	535	0.695	-26.8456
13.9363	0	535	0.6955	-28.4395
13.9463	0	535	0.696	-27.1894
13.9563	0	535	0.6965	-26.5643
13.9663	0	535	0.697	-29.6896
13.9764	0	535	0.6975	-26.4393
13.9864	0	535	0.698	-29.4083
13.9964	0	535	0.6985	-27.2519
14.0064	0	535	0.699	-28.9082
14.0164	0	535	0.6995	-26.1893
14.0264	0	535	0.7	-27.7832
14.0365	0	535	0.7005	-27.0956
14.0465	0	535	0.701	-28.0332
14.0565	0	535	0.7015	-27.3769
14.0665	0	535	0.702	-27.9707
14.0765	0	535	0.7025	-28.2832
14.0866	0	535	0.703	-28.0332
14.0966	0	535	0.7035	-29.1583
14.1066	0	535	0.704	-27.9707
14.1166	0	535	0.7045	-27.4081
14.1266	0	535	0.705	-27.9394
14.1367	0	535	0.7055	-27.5331
14.1467	0	535	0.706	-28.1895
14.1567	0	535	0.7065	-26.7831
14.1667	0	535	0.707	-26.6581
14.1767	0	535	0.7075	-27.4394
14.1868	0	535	0.708	-27.7207
14.1968	0	535	0.7085	-27.3144
14.2068	0	535	0.709	-28.5332
14.2168	0	535	0.7095	-28.7207
14.2268	0	535	0.71	-27.8457
14.2368	0	535	0.7105	-28.1269
14.2469	0	535	0.711	-27.3769
14.2569	0	535	0.7115	-28.9707
14.2669	0	535	0.712	-28.0019
14.2769	0	535	0.7125	-27.5331
14.2869	0	535	0.713	-27.9707
14.297	0	535	0.7135	-28.4395
14.307	0	535	0.714	-27.6894
14.317	0	535	0.7145	-28.1582
14.327	0	535	0.715	-27.7519
14.337	0	535	0.7155	-29.3145
14.3471	0	535	0.716	-28.5957
14.3571	0	535	0.7165	-28.9395
14.3671	0	535	0.717	-26.6581
14.3771	0	535	0.7175	-28.0332
14.3871	0	535	0.718	-29.252
14.3971	0	535	0.7185	-27.0956
14.4072	0	535	0.719	-29.6271
14.4172	0	535	0.7195	-27.3456
14.4272	0	535	0.72	-30.1896
14.4372	0	535	0.7205	-25.533
14.4472	0	535	0.721	-28.9395
14.4573	0	535	0.7215	-27.8144
14.4673	0	535	0.722	-26.6581
14.4773	0	535	0.7225	-28.502
14.4873	0	535	0.723	-27.9707
14.4973	0	535	0.7235	-28.6582
14.5074	0	535	0.724	-28.877
14.5174	0	535	0.7245	-29.1895
14.5274	0	535	0.725	-27.7832
14.5374	0	535	0.7255	-27.8144
14.5474	0	535	0.726	-27.7519
14.5574	0	535	0.7265	-27.8769
14.5675	0	535	0.727	-28.1582
14.5775	0	535	0.7275	-27.8769
14.5875	0	535	0.728	-29.377
14.5975	0	535	0.7285	-27.7832
14.6075	0	535	0.729	-27.1894
14.6176	0	535	0.7295	-27.6582
14.6276	0	535	0.73	-25.783
14.6376	0	535	0.7305	-27.2519
14.6476	0	535	0.731	-27.6894
14.6576	0	535	0.7315	-27.2519
14.6677	0	535	0.732	-28.5645
14.6777	0	535	0.7325	-27.5331
14.6877	0	535	0.733	-27.6269
14.6977	0	535	0.7335	-27.9707
14.7077	0	535	0.734	-27.8457
14.7178	0	535	0.7345	-27.3456
14.7278	0	535	0.735	-27.9082
14.7378	0	535	0.7355	-27.7519
14.7478	0	535	0.736	-27.8144
14.7578	0	535	0.7365	-27.3769
14.7678	0	535	0.737	-27.1894
14.7779	0	535	0.7375	-28.3145
14.7879	0	535	0.738	-27.5019
14.7979	0	535	0.7385	-27.3144
14.8079	0	535	0.739	-26.6893
14.8179	0	535	0.7395	-27.5019
14.828	0	535	0.74	-26.1268
14.838	0	535	0.7405	-27.3456
14.848	0	535	0.741	-26.6893
14.858	0	535	0.7415	-26.1893
14.868	0	535	0.742	-27.3144
14.8781	0	535	0.7425	-26.1893
14.8881	0	535	0.743	-28.1269
14.8981	0	535	0.7435	-25.1892
14.9081	0	535	0.744	-28.6582
14.9181	0	535	0.7445	-24.783
14.9281	0	535	0.745	-28.7207
14.9382	0	535	0.7455	-25.9705
14.9482	0	535	0.746	-27.6894
14.9582	0	535	0.7465	-27.1894
14.9682	0	535	0.747	-27.0331
14.9782	0	535	0.7475	-26.5018
14.9883	0	535	0.748	-26.5956
14.9983	0	535	0.7485	-27.5644
15.0083	0	535	0.749	-27.1894
15.0183	0	535	0.7495	-28.0332
15.0283	0	535	0.75	-26.7519
15.0384	0	535	0.7505	-28.7832
15.0484	0	535	0.751	-27.1894
15.0584	0	535	0.7515	-27.0331
15.0684	0	535	0.752	-27.3769
15.0784	0	535	0.7525	-26.5643
15.0885	0	535	0.753	-27.4081
15.0985	0	535	0.7535	-27.8144
15.1085	0	535	0.754	-26.3768
15.1185	0	535	0.7545	-27.6894
15.1285	0	535	0.755	-27.4706
15.1385	0	535	0.7555	-27.9082
15.1486	0	535	0.756	-27.4394
15.1586	0	535	0.7565	-27.1269
15.1686	0	535	0.757	-27.4081
15.1786	0	535	0.7575	-27.6582
15.1886	0	535	0.758	-28.4707
15.1987	0	535	0.7585	-28.4395
15.2087	0	535	0.759	-27.6269
15.2187	0	535	0.7595	-27.7519
15.2287	0	535	0.76	-27.1894
15.2387	0	535	0.7605	-26.4706
15.2488	0	535	0.761	-27.1581
15.2588	0	535	0.7615	-28.1895
15.2688	0	535	0.762	-27.0331
15.2788	0	535	0.7625	-28.1269
15.2888	0	535	0.763	-27.7519
15.2988	0	535	0.7635	-27.1581
15.3089	0	535	0.764	-27.9707
15.3189	0	535	0.7645	-27.7519
15.3289	0	535	0.765	-29.0332
15.3389	0	535	0.7655	-27.3144
15.3489	0	535	0.766	-28.5957
15.359	0	535	0.7665	-27.1894
15.369	0	535	0.767	-28.0644
15.379	0	535	0.7675	-27.3456
15.389	0	535	0.768	-29.5958
15.399	0	535	0.7685	-27.4081
15.4091	0	535	0.769	-29.0332
15.4191	0	535	0.7695	-28.4082
15.4291	0	535	0.77	-27.7832
15.4391	0	535	0.7705	-29.7521
15.4491	0	535	0.771	-29.1583
15.4591	0	535	0.7715	-28.9082
15.4692	0	535	0.772	-25.908
15.4792	0	535	0.7725	-30.1583
15.4892	0	535	0.773	-26.9394
15.4992	0	535	0.7735	-27.9707
15.5092	0	535	0.774	-27.7207
15.5193	0	535	0.7745	-27.7832
15.5293	0	535	0.775	-27.4081
15.5393	0	535	0.7755	-29.0332
15.5493	0	535	0.776	-28.0644
15.5593	0	535	0.7765	-27.9707
15.5694	0	535	0.777	-28.4707
15.5794	0	535	0.7775	-29.3145
15.5894	0	535	0.778	-28.627
15.5994	0	535	0.7785	-28.4082
15.6094	0	535	0.779	-26.8456
15.6195	0	535	0.7795	-27.9394
15.6295	0	535	0.78	-27.9707
15.6395	0	535	0.7805	-28.5645
15.6495	0	535	0.781	-28.1269
15.6595	0	535	0.7815	-27.1581
15.6695	0	535	0.782	-29.1583
15.6796	0	535	0.7825	-27.3144
15.6896	0	535	0.783	-28.1582
15.6996	0	535	0.7835	-28.1895
15.7096	0	535	0.784	-28.3145
15.7196	0	535	0.7845	-28.1895
15.7297	0	535	0.785	-27.1269
15.7397	0	535	0.7855	-28.252
15.7497	0	535	0.786	-28.1895
15.7597	0	535	0.7865	-29.0645
15.7697	0	535	0.787	-27.4081
15.7798	0	535	0.7875	-28.4707
15.7898	0	535	0.788	-28.5645
15.7998	0	535	0.7885	-27.7832
15.8098	0	535	0.789	-28.377
15.8198	0	535	0.7895	-27.7207
15.8298	0	535	0.79	-27.6894
15.8399	0	535	0.7905	-27.9394
15.8499	0	535	0.791	-28.5332
15.8599	0	535	0.7915	-26.4706
15.8699	0	535	0.792	-27.6269
15.8799	0	535	0.7925	-27.1581
15.89	0	535	0.793	-27.8144
15.9	0	535	0.7935	-28.7832
15.91	0	535	0.794	-27.9707
15.92	0	535	0.7945	-28.8457
15.93	0	535	0.795	-26.5018
15.9401	0	535	0.7955	-28.6582
15.9501	0	535	0.796	-25.1892
15.9601	0	535	0.7965	-29.7521
15.9701	0	535	0.797	-26.9706
15.9801	0	535	0.7975	-28.0957
15.9902	0	535	0.798	-27.4081
16.0002	0	535	0.7985	-29.1895
16.0102	0	535	0.799	-27.1269
16.0202	0	535	0.7995	-27.5644
16.0302	0	535	0.8	-27.3456
16.0402	0	535	0.8005	-27.4394
16.0503	0	535	0.801	-28.0332
16.0603	0	535	0.8015	-27.8144
16.0703	0	535	0.802	-28.2832
16.0803	0	535	0.8025	-28.1269
16.0903	0	535	0.803	-27.3456
16.1004	0	535	0.8035	-26.9706
16.1104	0	535	0.804	-27.5019
16.1204	0	535	0.8045	-27.8769
16.1304	0	535	0.805	-28.1269
16.1404	0	535	0.8055	-28.3457
16.1505	0	535	0.806	-27.9394
16.1605	0	535	0.8065	-27.7519
16.1705	0	535	0.807	-28.2832
16.1805	0	535	0.8075	-28.1895
16.1905	0	535	0.808	-28.4395
16.2005	0	535	0.8085	-28.0332
16.2106	0	535	0.809	-28.0332
16.2206	0	535	0.8095	-26.7831
16.2306	0	535	0.81	-28.1895
16.2406	0	535	0.8105	-28.1269
16.2506	0	535	0.811	-27.9707
16.2607	0	535	0.8115	-29.252
16.2707	0	535	0.812	-28.3457
16.2807	0	535	0.8125	-29.4708
16.2907	0	535	0.813	-27.9394
16.3007	0	535	0.8135	-28.8145
16.3108	0	535	0.814	-28.1895
16.3208	0	535	0.8145	-27.6582
16.3308	0	535	0.815	-28.7207
16.3408	0	535	0.8155	-27.1894
16.3508	0	535	0.816	-27.4706
16.3609	0	535	0.8165	-27.8144
16.3709	0	535	0.817	-29.1895
16.3809	0	535	0.8175	-28.502
16.3909	0	535	0.818	-29.0958
16.4009	0	535	0.8185	-29.1895
16.4109	0	535	0.819	-28.8457
16.421	0	535	0.8195	-27.1894
16.431	0	535	0.82	-27.9394
16.441	0	535	0.8205	-29.3458
16.451	0	535	0.821	-27.1894
16.461	0	535	0.8215	-30.1271
16.4711	0	535	0.822	-26.2518
16.4811	0	535	0.8225	-29.1895
16.4911	0	535	0.823	-26.9081
16.5011	0	535	0.8235	-29.5645
16.5111	0	535	0.824	-27.2831
16.5212	0	535	0.8245	-29.0958
16.5312	0	535	0.825	-28.1582
16.5412	0	535	0.8255	-27.5019
16.5512	0	535	0.826	-28.752
16.5612	0	535	0.8265	-28.6895
16.5712	0	535	0.827	-28.252
16.5813	0	535	0.8275	-27.4706
16.5913	0	535	0.828	-27.4706
16.6013	0	535	0.8285	-29.5645
16.6113	0	535	0.829	-28.5332
16.6213	0	535	0.8295	-28.3145
16.6314	0	535	0.83	-27.9082
16.6414	0	535	0.8305	-28.3145
16.6514	0	535	0.831	-28.1582
16.6614	0	535	0.8315	-28.4395
16.6714	0	535	0.832	-28.9082
16.6815	0	535	0.8325	-28.3145
16.6915	0	535	0.833	-28.7832
16.7015	0	535	0.8335	-28.1895
16.7115	0	535	0.834	-27.6269
16.7215	0	535	0.8345	-27.9394
16.7315	0	535	0.835	-27.1894
16.7416	0	535	0.8355	-27.8457
16.7516	0	535	0.836	-28.8145
16.7616	0	535	0.8365	-27.1894
16.7716	0	535	0.837	-26.9706
16.7816	0	535	0.8375	-28.502
16.7917	0	535	0.838	-29.4395
16.8017	0	535	0.8385	-27.8457
16.8117	0	535	0.839	-29.8771
16.8217	0	535	0.8395	-27.8144
16.8317	0	535	0.84	-27.8144
16.8418	0	535	0.8405	-29.4083
16.8518	0	535	0.841	-28.1895
16.8618	0	535	0.8415	-27.6582
16.8718	0	535	0.842	-28.9082
16.8818	0	535	0.8425	-27.7832
16.8919	0	535	0.843	-28.6582
16.9019	0	535	0.8435	-28.4082
16.9119	0	535	0.844	-27.9707
16.9219	0	535	0.8445	-29.2208
16.9319	0	535	0.845	-26.1581
16.9419	0	535	0.8455	-29.9396
16.952	0	535	0.846	-26.5018
16.962	0	535	0.8465	-29.2833
16.972	0	535	0.847	-26.8144
16.982	0	535	0.8475	-28.4082
16.992	0	535	0.848	-27.3456
17.0021	0	535	0.8485	-27.4706
17.0121	0	535	0.849	-27.7519
17.0221	0	535	0.8495	-27.0956
17.0321	0	535	0.85	-29.5958
17.0421	0	535	0.8505	-27.7832
17.0522	0	535	0.851	-28.627
17.0622	0	535	0.8515	-27.5644
17.0722	0	535	0.852	-27.6269
17.0822	0	535	0.8525	-26.6893
17.0922	0	535	0.853	-27.0956
17.1022	0	535	0.8535	-27.6269
17.1123	0	535	0.854	-27.8144
17.1223	0	535	0.8545	-27.9707
17.1323	0	535	0.855	-27.9082
17.1423	0	535	0.8555	-27.1894
17.1523	0	535	0.856	-27.4081
17.1624	0	535	0.8565	-26.7206
17.1724	0	535	0.857	-26.7831
17.1824	0	535	0.8575	-28.4395
17.1924	0	535	0.858	-27.5019
17.2024	0	535	0.8585	-26.9394
17.2125	0	535	0.859	-28.3457
17.2225	0	535	0.8595	-26.8769
17.2325	0	535	0.86	-27.6894
17.2425	0	535	0.8605	-26.9081
17.2525	0	535	0.861	-28.377
17.2626	0	535	0.8615	-26.5643
17.2726	0	535	0.862	-27.6894
17.2826	0	535	0.8625	-27.1269
17.2926	0	535	0.863	-28.3145
17.3026	0	535	0.8635	-26.6268
17.3126	0	535	0.864	-27.5331
17.3227	0	535	0.8645	-26.8769
17.3327	0	535	0.865	-28.377
17.3427	0	535	0.8655	-27.5331
17.3527	0	535	0.866	-27.3144
17.3627	0	535	0.8665	-27.4706
17.3728	0	535	0.867	-26.7206
17.3828	0	535	0.8675	-27.9394
17.3928	0	535	0.868	-27.0644
17.4028	0	535	0.8685	-27.9707
17.4128	0	535	0.869	-28.2832
17.4229	0	535	0.8695	-27.3456
17.4329	0	535	0.87	-26.6893
17.4429	0	535	0.8705	-27.0019
17.4529	0	535	0.871	-28.9707
17.4629	0	535	0.8715	-25.8143
17.4729	0	535	0.872	-28.9395
17.483	0	535	0.8725	-25.7205
17.493	0	535	0.873	-28.1582
17.503	0	535	0.8735	-26.1581
17.513	0	535	0.874	-29.7833
17.523	0	535	0.8745	-25.6893
17.5331	0	535	0.875	-28.0644
17.5431	0	535	0.8755	-26.1581
17.5531	0	535	0.876	-26.1893
17.5631	0	535	0.8765	-25.8455
17.5731	0	535	0.877	-26.4081
17.5832	0	535	0.8775	-26.1893
17.5932	0	535	0.878	-27.0331
17.6032	0	535	0.8785	-27.1894
17.6132	0	535	0.879	-26.9081
17.6232	0	535	0.8795	-26.1268
17.6332	0	535	0.88	-27.0956
17.6433	0	535	0.8805	-26.5956
17.6533	0	535	0.881	-27.0644
17.6633	0	535	0.8815	-27.4706
17.6733	0	535	0.882	-27.1581
17.6833	0	535	0.8825	-26.5643
17.6934	0	535	0.883	-27.0019
17.7034	0	535	0.8835	-27.1894
17.7134	0	535	0.884	-26.4706
17.7234	0	535	0.8845	-25.9393
17.7334	0	535	0.885	-27.0331
17.7435	0	535	0.8855	-26.3456
17.7535	0	535	0.886	-27.4081
17.7635	0	535	0.8865	-26.3456
17.7735	0	535	0.887	-25.908
17.7835	0	535	0.8875	-26.2518
17.7936	0	535	0.888	-26.6893
17.8036	0	535	0.8885	-25.0955
17.8136	0	535	0.889	-26.1581
17.8236	0	535	0.8895	-26.5643
17.8336	0	535	0.89	-25.158
17.8436	0	535	0.8905	-26.1581
17.8537	0	535	0.891	-25.3768
17.8637	0	535	0.8915	-27.3144
17.8737	0	535	0.892	-26.9081
17.8837	0	535	0.8925	-27.4394
17.8937	0	535	0.893	-26.4393
17.9038	0	535	0.8935	-25.658
17.9138	0	535	0.894	-27.8769
17.9238	0	535	0.8945	-25.408
17.9338	0	535	0.895	-26.4081
17.9438	0	535	0.8955	-25.8143
17.9539	0	535	0.896	-26.3768
17.9639	0	535	0.8965	-24.6267
17.9739	0	535	0.897	-26.6268
17.9839	0	535	0.8975	-25.658
17.9939	0	535	0.898	-26.6893
18.0039	0	535	0.8985	-26.3143
18.014	0	535	0.899	-24.8767
18.024	0	535	0.8995	-26.3456
18.034	0	535	0.9	-26.8144
18.044	0	535	0.9005	-27.4706
18.054	0	535	0.901	-26.8456
18.0641	0	535	0.9015	-26.4081
18.0741	0	535	0.902	-26.7831
18.0841	0	535	0.9025	-26.0643
18.0941	0	535	0.903	-26.3768
18.1041	0	535	0.9035	-27.3769
18.1142	0	535	0.904	-26.5643
18.1242	0	535	0.9045	-26.9394
18.1342	0	535	0.905	-27.0644
18.1442	0	535	0.9055	-26.4706
18.1542	0	535	0.906	-26.7206
18.1643	0	535	0.9065	-26.0955
18.1743	0	535	0.907	-25.6893
18.1843	0	535	0.9075	-27.0644
18.1943	0	535	0.908	-26.5643
18.2043	0	535	0.9085	-27.1581
18.2143	0	535	0.909	-27.5331
18.2244	0	535	0.9095	-27.0956
18.2344	0	535	0.91	-26.5331
18.2444	0	535	0.9105	-27.5019
18.2544	0	535	0.911	-27.6582
18.2644	0	535	0.9115	-26.1893
18.2745	0	535	0.912	-27.0956
18.2845	0	535	0.9125	-27.1581
18.2945	0	535	0.913	-27.1269
18.3045	0	535	0.9135	-27.0019
18.3145	0	535	0.914	-26.3768
18.3246	0	535	0.9145	-26.7831
18.3346	0	535	0.915	-26.5956
18.3446	0	535	0.9155	-27.1269
18.3546	1.29	535	0.916	-25.8455
18.3646	0.34	535	0.9165	-27.5644
18.3746	0.66	535	0.917	-26.7831
18.3847	0.39	535	0.9175	-27.1894
18.3947	0.64	535	0.918	-26.8769
18.4047	0.07	535	0.9185	-27.0331
18.4147	-0.14	535	0.919	-25.9705
18.4247	-0.2	535	0.9195	-26.8456
18.4348	0.44	535	0.92	-27.4081
18.4448	0.27	535	0.9205	-23.6266
18.4548	0.45	535	0.921	-29.002
18.4648	0.76	535	0.9215	-26.2831
18.4748	-0.07	535	0.922	-28.9707
18.4849	0.23	535	0.9225	-25.0017
18.4949	-0.22	535	0.923	-28.752
18.5049	0.52	535	0.9235	-24.9705
18.5149	0.55	535	0.924	-27.6582
18.5249	0.84	535	0.9245	-26.1893
18.5349	0.39	535	0.925	-27.2206
18.545	0.27	535	0.9255	-26.5331
18.555	0.36	535	0.926	-26.1581
18.565	0.18	535	0.9265	-27.4394
18.575	0.52	535	0.927	-26.5018
18.585	-0.47	535	0.9275	-27.8457
18.5951	-0.41	535	0.928	-27.6894
18.6051	0.3	535	0.9285	-25.8143
18.6151	-0.27	535	0.929	-28.1582
18.6251	0.29	535	0.9295	-27.7519
18.6351	-0.36	535	0.93	-27.5019
18.6452	0.34	535	0.9305	-27.7832
18.6552	0.93	535	0.931	-26.5643
18.6652	-0.3	535	0.9315	-27.5019
18.6752	-0.37	535	0.932	-27.4706
18.6852	0.44	535	0.9325	-26.9081
18.6953	-0.12	535	0.933	-27.6582
18.7053	0.55	535	0.9335	-26.8456
18.7153	0.09	535	0.934	-27.6894
18.7253	0.4	535	0.9345	-27.3456
18.7353	0.38	535	0.935	-26.8456
18.7453	0.18	535	0.9355	-26.1268
18.7554	0.13	535	0.936	-27.8144
18.7654	0.44	535	0.9365	-26.9394
18.7754	-0.66	535	0.937	-27.2519
18.7854	0.35	535	0.9375	-27.6269
18.7954	0.45	535	0.938	-26.9081
18.8055	-0.18	535	0.9385	-27.4706
18.8155	-0.3	535	0.939	-26.0643
18.8255	0.08	535	0.9395	-28.252
18.8355	0.24	535	0.94	-27.1269
18.8455	0.78	535	0.9405	-27.6582
18.8556	-0.46	535	0.941	-27.1894
18.8656	0.4	535	0.9415	-26.7519
18.8756	0.14	535	0.942	-27.8769
18.8856	-0.71	535	0.9425	-27.0019
18.8956	-0.09	535	0.943	-28.3457
18.9056	0.06	535	0.9435	-27.4081
18.9157	-0.39	535	0.944	-28.502
18.9257	0.34	535	0.9445	-26.9394
18.9357	0.17	535	0.945	-29.127
18.9457	-0.47	535	0.9455	-27.5331
18.9557	0.01	535	0.946	-28.0019
18.9658	-0.58	535	0.9465	-27.0644
18.9758	-0.69	535	0.947	-27.6269
18.9858	-0.06	535	0.9475	-28.1895
18.9958	-0.3	535	0.948	-26.8769
19.0058	-0.28	535	0.9485	-29.6583
19.0159	0.21	535	0.949	-26.3768
19.0259	-0.04	535	0.9495	-27.9707
19.0359	0.26	535	0.95	-26.1893
19.0459	-1.09	535	0.9505	-28.5332
19.0559	0.22	535	0.951	-26.4393
19.066	-0.17	535	0.9515	-27.9082
19.076	-0.23	535	0.952	-26.6581
19.086	0.24	535	0.9525	-26.9081
19.096	-0.15	535	0.953	-29.1895
19.106	-0.78	535	0.9535	-27.2831
19.116	0.02	535	0.954	-28.3145
19.1261	0.53	535	0.9545	-27.9707
19.1361	-0.24	535	0.955	-27.6582
19.1461	-0.05	535	0.9555	-28.877
19.1561	-0.24	535	0.956	-28.1582
19.1661	-1.02	535	0.9565	-27.9082
19.1762	0.38	535	0.957	-28.5957
19.1862	-0.76	535	0.9575	-28.0957
19.1962	0.14	535	0.958	-27.4706
19.2062	-0.49	535	0.9585	-28.1269
19.2162	-0.41	535	0.959	-28.1582
19.2263	-0.29	535	0.9595	-27.4394
19.2363	-0.43	535	0.96	-27.6582
19.2463	0.13	535	0.9605	-28.4707
19.2563	0.11	535	0.961	-28.0019
19.2663	-1.07	535	0.9615	-28.3145
19.2763	-0.85	535	0.962	-28.1895
19.2864	-0.71	535	0.9625	-28.1582
19.2964	-0.1	535	0.963	-27.9707
19.3064	-0.36	535	0.9635	-28.627
19.3164	-0.23	535	0.964	-28.1582
19.3264	-0.79	535	0.9645	-27.4706
19.3365	-0.38	535	0.965	-27.4394
19.3465	-0.42	535	0.9655	-25.8768
19.3565	-0.2	535	0.966	-28.0644
19.3665	-0.51	535	0.9665	-26.0643
19.3765	-0.45	535	0.967	-27.9394
19.3866	-0.48	535	0.9675	-27.5019
19.3966	-0.6	535	0.968	-27.2831
19.4066	-0.6	535	0.9685	-27.0019
19.4166	-0.29	535	0.969	-26.2518
19.4266	-0.67	535	0.9695	-28.3457
19.4366	-0.76	535	0.97	-25.3768
19.4467	0.25	535	0.9705	-27.7832
19.4567	-0.25	535	0.971	-26.033
19.4667	-0.59	535	0.9715	-28.4707
19.4767	-0.04	535	0.972	-26.9394
19.4867	0.55	535	0.9725	-28.6582
19.4968	-0.3	535	0.973	-25.7518
19.5068	-0.18	535	0.9735	-27.5957
19.5168	0.33	535	0.974	-28.8145
19.5268	0.16	535	0.9745	-26.2518
19.5368	-0.39	535	0.975	-28.5645
19.5469	0.46	535	0.9755	-25.6893
19.5569	0.03	535	0.976	-27.5957
19.5669	0.36	535	0.9765	-26.0955
19.5769	0.83	535	0.977	-27.4081
19.5869	0.71	535	0.9775	-27.3456
19.597	-0.13	535	0.978	-28.377
19.607	-0.28	535	0.9785	-27.2519
19.617	0.23	535	0.979	-28.5957
19.627	0.24	535	0.9795	-27.4081
19.637	0.15	535	0.98	-26.6893
19.647	0.11	535	0.9805	-26.9394
19.6571	-0.12	535	0.981	-25.9393
19.6671	-0.03	535	0.9815	-27.3456
19.6771	-0.44	535	0.982	-26.8769
19.6871	0.02	535	0.9825	-28.5332
19.6971	0.19	535	0.983	-27.0019
19.7072	-0.01	535	0.9835	-27.1894
19.7172	-0.97	535	0.984	-26.7206
19.7272	-0.67	535	0.9845	-27.1581
19.7372	-0.4	535	0.985	-27.9082
19.7472	-0.46	535	0.9855	-27.2519
19.7573	0.02	535	0.986	-27.3769
19.7673	0.71	535	0.9865	-27.9394
19.7773	0.29	535	0.987	-27.0956
19.7873	-0.84	535	0.9875	-26.7519
19.7973	0.41	535	0.988	-26.6893
19.8073	-0.27	535	0.9885	-27.1269
19.8174	0.4	535	0.989	-26.9081
19.8274	-0.02	535	0.9895	-27.9082
19.8374	-0.1	535	0.99	-26.2831
19.8474	-0.37	535	0.9905	-27.5644
19.8574	0.13	535	0.991	-24.6892
19.8675	-0.4	535	0.9915	-27.5957
19.8775	-0.71	535	0.992	-26.1893
19.8875	-0.12	535	0.9925	-27.1269
19.8975	-0.22	535	0.993	-26.5331
19.9075	-0.22	535	0.9935	-27.9394
19.9176	0.29	535	0.994	-26.5956
19.9276	0.29	535	0.9945	-26.1893
19.9376	0.49	535	0.995	-27.4081
19.9476	-0.04	535	0.9955	-25.1892
19.9576	-0.15	535	0.996	-27.6894
19.9677	0.28	535	0.9965	-26.3456
19.9777	-0.2	535	0.997	-28.6895
19.9877	0.08	535	0.9975	-25.4393
19.9977	0.49	535	0.998	-27.5331
20.0077	0.12	535	0.9985	-27.5957
[truncated: 52,002 more rows]

## Sheet: 2 C
optical	Title: 2 11 Date: 2021/12/09 09:58		Title: 1 5 Date: 2022/01/14 10:05		Title: 3 7 Date: 2022/01/14 13:05		Title: 4 3 Date: 2022/07/06 14:28		Title: 2 6 Date: 2022/07/08 12:39		Title: 3 4 Date: 2022/07/19 12:27		Title: 4 7 Date: 2022/07/19 14:23		Title: 5 7 Date: 2022/07/19 15:09		Title: 2 4 Date: 2022/07/20 13:52		Title: 2 8 Date: 2022/07/21 10:49		Title: 1 7 Date: 2022/07/21 09:52		Title: 4 6 Date: 2022/07/21 13:31		optical				Time (s)	202111209 2-11.asc	20220114 1-5.asc	20220114 3-7.asc	20220706 4-3.asc	20220708 2-6.asc	20220719 3-4.asc	20220719 4-7.asc	20220719 5-7.asc	20220720 2-4.asc	20220721 2-8.asc	20220721 1-7.asc	20220721 4-6.asc	Mean	SEM
																									DF/F0	DF/F0	Wavelength	Wavelength	0	-26.5643	-21.4702	-15.6886	-23.1578	-18.5325	-3.31273	7.03174	-19.0013	-20.0639	-20.5014	-14.4697	9.59441	-13.8447	3.41361
Time	dF/F0_bleach_correct	Wavelength	dF/F0_bleach_correct	Wavelength	dF/F0_bleach_correct	Wavelength	dF/F0_bleach_correct	Wavelength	dF/F0_bleach_correct	Wavelength	dF/F0_bleach_correct	Wavelength	dF/F0_bleach_correct	Wavelength	dF/F0_bleach_correct	Wavelength	dF/F0_bleach_correct	Wavelength	dF/F0_bleach_correct	Wavelength	dF/F0_bleach_correct	Wavelength	dF/F0_bleach_correct	Wavelength	Mean	SEM	Mean	SEM	0.0005	-26.7831	-21.6578	-15.8761	-21.1577	-18.1888	-1.15633	6.65671	-19.1263	-19.6576	-19.4076	-13.4072	12.0946	-13.1389	3.53116
0.01	0	520	0	530	0	525	0	535	0	535	0	535	0	535	0	535	0	525	0	535	0	535	0	535	0	0	531.538	1.43051	0.001	-26.5643	-21.7515	-16.4386	-21.939	-19.3763	-2.09389	4.06278	-18.6263	-19.2826	-20.9389	-13.1884	8.65685	-13.9567	3.25119
0.02	0	520	0	530	0	525	0	535	0	535	0	535	0	535	0	535	0	525	0	535	0	535	0	535	0	0	531.538	1.43051	0.0015	-26.1581	-21.0952	-15.6261	-22.4391	-18.0325	-1.37509	2.75019	-19.1888	-21.189	-21.189	-13.4384	11.032	-13.8291	3.35421
0.0301	0	520	0	530	0	525	0	535	0	535	0	535	0	535	0	535	0	525	0	535	0	535	0	535	0	0	531.538	1.43051	0.002	-26.1581	-21.8453	-15.8136	-21.939	-18.4388	-2.43767	2.09389	-19.1263	-19.2513	-20.4389	-11.282	10.4695	-13.6806	3.24308
0.0401	0	520	0	530	0	525	0	535	0	535	0	535	0	535	0	535	0	525	0	535	0	535	0	535	0	0	531.538	1.43051	0.0025	-26.9394	-21.2202	-15.6573	-21.189	-18.095	-0.43753	-1.40635	-18.9701	-21.189	-20.6264	-13.5322	10.6882	-14.0478	3.21371
0.0501	0	520	0	530	0	525	0	535	0	535	0	535	0	535	0	535	0	525	0	535	0	535	0	535	0	0	531.538	1.43051	0.003	-26.6581	-21.939	-15.5636	-20.6889	-17.345	-0.59379	-1.34384	-19.9076	-19.4076	-20.3452	-13.7509	11.5008	-13.8369	3.22863
0.0601	0	520	0	530	0	525	0	535	0	535	0	535	0	535	0	535	0	525	0	535	0	535	0	535	0	0	531.538	1.43051	0.0035	-26.4081	-21.189	-15.3448	-21.9703	-18.1888	-0.93756	-2.90645	-19.2826	-21.3765	-21.189	-13.4697	11.0633	-14.2666	3.19067
0.0701	0	520	0	530	0	525	0	535	0	535	0	535	0	535	0	535	0	525	0	535	0	535	0	535	0	0	531.538	1.43051	0.004	-26.1268	-21.4702	-15.5011	-22.6578	-17.8137	0.7188	-3.96902	-18.8763	-20.6889	-19.8764	-12.5321	10.5007	-14.0244	3.15912
0.0802	0	520	0	530	0	525	0	535	0	535	0	535	0	535	0	535	0	525	0	535	0	535	0	535	0	0	531.538	1.43051	0.0045	-26.1581	-21.0639	-15.3761	-22.9078	-18.4075	-0.12501	-7.31301	-18.6263	-19.8139	-20.6264	-13.4072	12.6884	-14.2614	3.1939
0.0902	0	520	0	530	0	525	0	535	0	535	0	535	0	535	0	535	0	525	0	535	0	535	0	535	0	0	531.538	1.43051	0.005	-26.3456	-21.5327	-15.8448	-22.064	-16.8449	2.90645	-7.188	-18.0325	-20.5014	-19.6576	-13.2197	10.407	-13.9932	3.14397
0.1002	0	520	0	530	0	525	0	535	0	535	0	535	0	535	0	535	0	525	0	535	0	535	0	535	0	0	531.538	1.43051	0.0055	-25.8768	-21.0327	-15.7511	-22.0953	-15.3448	0.59379	-9.43815	-18.6575	-21.189	-21.189	-12.9696	11.7196	-14.2692	3.11577
0.1102	0	520	0	530	0	525	0	535	0	535	0	535	0	535	0	535	0	525	0	535	0	535	0	535	0	0	531.538	1.43051	0.006	-26.5018	-20.7202	-15.9698	-22.9078	-17.0949	2.31266	-11.0008	-18.1888	-21.1265	-20.3139	-12.9071	12.6571	-14.3135	3.24292
0.1202	0	520	0	530	0	525	0	535	0	535	0	535	0	535	0	535	0	525	0	535	0	535	0	535	0	0	531.538	1.43051	0.0065	-26.5331	-21.3765	-16.3761	-23.5641	-15.9073	3.96902	-11.7821	-19.3763	-20.7827	-20.9389	-13.3447	11.8446	-14.514	3.28946
0.1302	0	520	0	530	0	525	0	535	0	535	0	535	0	535	0	535	0	525	0	535	0	535	0	535	0	0	531.538	1.43051	0.007	-26.5018	-22.189	-15.4698	-22.5641	-16.4074	1.56261	-13.1884	-17.97	-20.6889	-20.8139	-13.5634	11.4383	-14.6963	3.1333
0.1403	0	520	0	530	0	525	0	535	0	535	0	535	0	535	0	535	0	525	0	535	0	535	0	535	0	0	531.538	1.43051	0.0075	-26.5956	-21.7828	-15.6886	-22.3453	-16.6261	5.21911	-14.4072	-18.8138	-20.8452	-20.6577	-13.1884	12.0321	-14.475	3.32361
0.1503	0	520	0	530	0	525	0	535	0	535	0	535	0	535	0	535	0	525	0	535	0	535	0	535	0	0	531.538	1.43051	0.008	-25.9705	-21.9078	-16.3136	-22.0015	-15.9073	3.56275	-14.626	-18.7513	-21.314	-19.5951	-13.1884	11.032	-14.5817	3.16019
0.1603	0	520	0	530	0	525	0	535	0	535	0	535	0	535	0	535	0	525	0	535	0	535	0	535	0	0	531.538	1.43051	0.0085	-26.3456	-22.0328	-15.7823	-21.9703	-16.7512	6.81297	-16.0011	-18.47	-20.4389	-20.5952	-14.126	14.0947	-14.3005	3.50495
0.1703	0	520	0	530	0	525	0	535	0	535	0	535	0	535	0	535	0	525	0	535	0	535	0	535	0	0	531.538	1.43051	0.009	-26.5018	-21.689	-15.8761	-22.7828	-15.9698	6.34419	-17.3137	-20.3139	-20.0639	-20.6889	-13.1884	12.8134	-14.6026	3.43936
0.1803	0	520	0	530	0	525	0	535	0	535	0	535	0	535	0	535	0	525	0	535	0	535	0	535	0	0	531.538	1.43051	0.0095	-26.6581	-22.189	-15.6886	-23.5954	-15.4073	8.25057	-18.6263	-18.9076	-21.5015	-20.4702	-13.6884	9.90693	-14.8812	3.39922
0.1904	0	520	0	530	0	525	0	535	0	535	0	535	0	535	0	535	0	525	0	535	0	535	0	535	0	0	531.538	1.43051	0.01	-26.6268	-21.6265	-16.0636	-22.5953	-15.5011	8.87561	-17.4387	-18.1888	-21.4077	-19.2201	-13.5322	13.5322	-14.1494	3.57893
0.2004	0	520	0	530	0	525	0	535	0	535	0	535	0	535	0	535	0	525	0	535	0	535	0	535	0	0	531.538	1.43051	0.0105	-26.4706	-22.3765	-16.1574	-23.4704	-15.126	9.62566	-19.1576	-18.1262	-21.8765	-20.5639	-13.4384	11.7508	-14.6156	3.57505
0.2104	0	520	0	530	0	525	0	535	0	535	0	535	0	535	0	535	0	525	0	535	0	535	0	535	0	0	531.538	1.43051	0.011	-26.8769	-22.0953	-16.4074	-23.1578	-15.3448	13.3134	-19.9701	-19.7826	-20.0639	-19.1576	-12.9696	11.7196	-14.2328	3.75701
0.2204	0	520	0	530	0	525	0	535	0	535	0	535	0	535	0	535	0	525	0	535	0	535	0	535	0	0	531.538	1.43051	0.0115	-26.8144	-22.064	-16.1574	-24.0954	-15.001	12.6571	-20.0326	-17.8762	-20.1576	-20.8764	-14.9073	12.3758	-14.4125	3.77241
0.2304	0	520	0	530	0	525	0	535	0	535	0	535	0	535	0	535	0	525	0	535	0	535	0	535	0	0	531.538	1.43051	0.012	-26.7206	-22.1265	-16.0011	-23.6891	-14.7823	15.8136	-20.0014	-18.1575	-21.0639	-20.1889	-13.4384	12.6259	-13.9775	3.95615
0.2405	0	520	0	530	0	525	0	535	0	535	0	535	0	535	0	535	0	525	0	535	0	535	0	535	0	0	531.538	1.43051	0.0125	-26.5956	-21.8765	-16.0636	-23.5954	-14.001	16.0949	-21.1265	-17.7512	-22.3453	-20.4702	-12.8446	12.3133	-14.0218	3.98178
0.2505	0	520	0	530	0	525	0	535	0	535	0	535	0	535	0	535	0	525	0	535	0	535	0	535	0	0	531.538	1.43051	0.013	-27.1269	-21.8453	-16.9074	-23.0641	-14.0635	18.8138	-21.8453	-20.1576	-20.5014	-20.7202	-12.3758	11.3133	-14.04	4.1116
0.2605	0	520	0	530	0	525	0	535	0	535	0	535	0	535	0	535	0	525	0	535	0	535	0	535	0	0	531.538	1.43051	0.0135	-26.5956	-22.189	-16.1574	-23.6579	-13.3134	21.2202	-20.5639	-18.7513	-19.9701	-19.9389	-12.7821	11.0633	-13.4697	4.19904
0.2705	0	520	0	530	0	525	0	535	0	535	0	535	0	535	0	535	0	525	0	535	0	535	0	535	0	0	531.538	1.43051	0.014	-26.7519	-22.1578	-16.0324	-23.4704	-12.0633	20.9702	-22.3765	-17.1574	-20.8452	-20.4389	-13.1884	11.0008	-13.5426	4.21153
0.2805	0	520	0	530	0	525	0	535	0	535	0	535	0	535	0	535	0	525	0	535	0	535	0	535	0	0	531.538	1.43051	0.0145	-27.0644	-21.7515	-16.0011	-21.9703	-13.4072	23.0016	-21.939	-19.0638	-20.8452	-20.0639	-12.0321	11.1883	-13.329	4.32836
0.2905	0	520	0	530	0	525	0	535	0	535	0	535	0	535	0	535	0	525	0	535	0	535	0	535	0	0	531.538	1.43051	0.015	-26.4393	-22.314	-16.6261	-22.4391	-13.5009	24.8142	-22.6578	-16.6261	-20.3452	-21.1577	-14.0635	9.93819	-13.4515	4.39658
0.3006	0	520	0	530	0	525	0	535	0	535	0	535	0	535	0	535	0	525	0	535	0	535	0	535	0	0	531.538	1.43051	0.0155	-26.7519	-21.8765	-16.0011	-21.939	-13.6259	25.8768	-22.7828	-19.8139	-20.7827	-22.6578	-12.3758	11.4383	-13.441	4.57254
0.3106	0	520	0	530	0	525	0	535	0	535	0	535	0	535	0	535	0	525	0	535	0	535	0	535	0	0	531.538	1.43051	0.016	-26.8769	-22.189	-16.1886	-23.1266	-12.0321	28.0957	-21.939	-17.7512	-20.0639	-19.9389	-12.5321	11.2195	-12.7769	4.65983
0.3206	0	520	0	530	0	525	0	535	0	535	0	535	0	535	0	535	0	525	0	535	0	535	0	535	0	0	531.538	1.43051	0.0165	-26.6581	-22.5328	-16.0011	-23.5016	-11.8133	27.2519	-22.1265	-19.3763	-20.6264	-20.5327	-11.6258	10.657	-13.0738	4.62098
0.3306	0	520	0	530	0	525	0	535	0	535	0	535	0	535	0	535	0	525	0	535	0	535	0	535	0	0	531.538	1.43051	0.017	-26.6268	-22.189	-16.0011	-22.9078	-10.9383	27.9707	-22.3765	-17.1262	-21.0952	-19.1888	-12.8759	11.0945	-12.6884	4.64523
0.3406	0	520	0	530	0	525	0	535	0	535	0	535	0	535	0	535	0	525	0	535	0	535	0	535	0	0	531.538	1.43051	0.0175	-27.0019	-22.7203	-16.5636	-22.9078	-11.282	28.2832	-24.2829	-19.6576	-20.9702	-18.5325	-12.1883	10.6257	-13.0999	4.71388
0.3507	0	520	0	530	0	525	0	535	0	535	0	535	0	535	0	535	0	525	0	535	0	535	0	535	0	0	531.538	1.43051	0.018	-26.1893	-22.5953	-16.6261	-24.0329	-11.1883	28.8457	-22.4703	-16.5636	-21.5952	-20.5327	-12.2821	9.84443	-12.9488	4.69575
0.3607	0	520	0	530	0	525	0	535	0	535	0	535	0	535	0	535	0	525	0	535	0	535	0	535	0	0	531.538	1.43051	0.0185	-26.7206	-22.5328	-15.1885	-24.3767	-10.5632	28.0957	-22.8453	-18.7826	-19.9701	-20.1576	-11.7821	9.93819	-12.9071	4.65952
0.3707	0	520	0	530	0	525	0	535	0	535	0	535	0	535	0	535	0	525	0	535	0	535	0	535	0	0	531.538	1.43051	0.019	-27.0956	-22.4391	-16.0949	-23.5016	-9.65692	28.2207	-22.7203	-17.47	-20.6889	-20.0951	-12.3446	11.5945	-12.691	4.72427
0.3807	0	520	0	530	0	525	0	535	0	535	0	535	0	535	0	535	0	525	0	535	0	535	0	535	0	0	531.538	1.43051	0.0195	-26.3456	-22.5328	-16.1886	-23.1578	-9.90693	28.0644	-23.0641	-17.845	-20.3452	-21.0014	-12.2821	8.90687	-12.9749	4.60676
0.3907	0	520	0	530	0	525	0	535	0	535	0	535	0	535	0	535	0	525	0	535	0	535	0	535	0	0	531.538	1.43051	0.02	-26.4706	-22.5641	-16.3761	-22.4078	-9.25064	26.5956	-23.0016	-16.6886	-21.7828	-20.1576	-12.3758	9.71942	-12.8967	4.53366
0.4008	0	520	0	530	0	525	0	535	0	535	0	535	0	535	0	535	0	525	0	535	0	535	0	535	0	0	531.538	1.43051	0.0205	-26.7206	-22.9078	-16.1886	-22.9391	-10.0007	27.4081	-23.6266	-17.97	-22.0015	-20.9077	-14.0947	10.0007	-13.329	4.6444
0.4108	0	520	0	530	0	525	0	535	0	535	0	535	0	535	0	535	0	525	0	535	0	535	0	535	0	0	531.538	1.43051	0.021	-27.4706	-22.2515	-16.1261	-20.9389	-7.87554	26.0018	-23.2829	-17.9075	-20.1889	-20.5639	-11.6258	10.1257	-12.6754	4.51372
0.4208	0	520	0	530	0	525	0	535	0	535	0	535	0	535	0	535	0	525	0	535	0	535	0	535	0	0	531.538	1.43051	0.0215	-26.7519	-22.189	-16.1261	-21.5952	-7.31301	25.5955	-21.0952	-18.8451	-20.1889	-20.6577	-11.657	9.3444	-12.6233	4.42834
0.4308	0	520	0	530	0	525	0	535	0	535	0	535	0	535	0	535	0	525	0	535	0	535	0	535	0	0	531.538	1.43051	0.022	-26.8144	-22.3453	-17.0012	-20.3764	-7.188	24.0954	-22.064	-18.2825	-20.8139	-20.5952	-12.5634	10.0319	-12.8264	4.36719
0.4408	0	520	0	530	0	525	0	535	0	535	0	535	0	535	0	535	0	525	0	535	0	535	0	535	0	0	531.538	1.43051	0.0225	-26.8456	-22.5953	-16.5949	-21.3452	-7.188	24.5329	-23.6891	-17.3762	-21.0014	-20.7514	-11.0008	10.1257	-12.8108	4.44215
0.4509	0	520	0	530	0	525	0	535	0	535	0	535	0	535	0	535	0	525	0	535	0	535	0	535	0	0	531.538	1.43051	0.023	-26.8144	-22.8766	-16.3761	-23.3454	-6.59421	22.7203	-24.1892	-17.9387	-20.4389	-21.814	-12.1883	10.532	-13.277	4.40376
0.4609	0	520	0	530	0	525	0	535	0	535	0	535	0	535	0	535	0	525	0	535	0	535	0	535	0	0	531.538	1.43051	0.0235	-26.8456	-23.1578	-16.1574	-21.4702	-6.25043	22.8766	-23.1891	-17.2824	-20.5327	-19.7826	-12.6884	11.157	-12.7769	4.36693
0.4709	0	520	0	530	0	525	0	535	0	535	0	535	0	535	0	535	0	525	0	535	0	535	0	535	0	0	531.538	1.43051	0.024	-26.5643	-23.4391	-16.8449	-23.2203	-5.53163	22.5328	-22.6266	-17.7512	-20.0014	-19.6889	-12.1883	10.532	-12.8993	4.34659
0.4809	0	520	0	530	0	525	0	535	0	535	0	535	0	535	0	535	0	525	0	535	0	535	0	535	0	0	531.538	1.43051	0.0245	-26.4706	-22.9391	-16.5324	-22.7828	-5.12535	21.3765	-23.1578	-17.845	-20.4702	-20.6264	-12.3133	9.75067	-13.0947	4.25579
0.4909	0	520	0	530	0	525	0	535	0	535	0	535	0	535	0	535	0	525	0	535	0	535	0	535	0	0	531.538	1.43051	0.025	-26.9394	-23.0328	-17.1887	-23.1891	-5.18786	20.9702	-24.1267	-17.8137	-20.5639	-20.0951	-12.1258	11.4695	-13.152	4.33896
0.5009	0	520	0	530	0	525	0	535	0	535	0	535	0	535	0	535	0	525	0	535	0	535	0	535	0	0	531.538	1.43051	0.0255	-26.6581	-23.4704	-16.6261	-21.939	-3.56275	20.2514	-22.5641	-18.6888	-20.0014	-21.189	-11.9696	11.157	-12.9384	4.2715
0.511	0	520	0	530	0	525	0	535	0	535	0	535	0	535	0	535	0	525	0	535	0	535	0	535	0	0	531.538	1.43051	0.026	-26.9081	-22.9078	-16.5949	-23.0328	-3.43774	19.4701	-23.3141	-18.3138	-20.2514	-19.2513	-13.3759	11.032	-13.0738	4.22369
0.521	0	520	0	530	0	525	0	535	0	535	0	535	0	535	0	535	0	525	0	535	0	535	0	535	0	0	531.538	1.43051	0.0265	-26.6893	-23.3454	-16.8762	-22.9078	-2.65643	17.4075	-22.9078	-17.97	-20.3764	-19.0638	-12.1883	10.8133	-13.0634	4.10187
0.531	0	520	0	530	0	525	0	535	0	535	0	535	0	535	0	535	0	525	0	535	0	535	0	535	0	0	531.538	1.43051	0.027	-26.6581	-23.2829	-17.6262	-22.4703	-1.53136	17.97	-23.4079	-17.5637	-21.189	-20.9077	-13.3134	11.5633	-13.2014	4.22452
0.541	0	520	0	530	0	525	0	535	0	535	0	535	0	535	0	535	0	525	0	535	0	535	0	535	0	0	531.538	1.43051	0.0275	-26.8769	-23.6579	-16.5324	-21.6578	-0.68755	16.9387	-23.1891	-17.5637	-20.9077	-20.1264	-12.2821	11.6883	-12.9045	4.1646
0.551	0	520	0	530	0	525	0	535	0	535	0	535	0	535	0	535	0	525	0	535	0	535	0	535	0	0	531.538	1.43051	0.028	-26.6893	-23.3766	-16.7824	-22.8453	-0.0625	15.1885	-22.5016	-18.7513	-21.1577	-20.0951	-11.4383	11.6883	-13.0686	4.10139
0.5611	0	520	0	530	0	525	0	535	0	535	0	535	0	535	0	535	0	525	0	535	0	535	0	535	0	0	531.538	1.43051	0.0285	-26.8144	-23.6579	-16.5324	-22.189	0.50003	15.126	-22.4391	-17.7512	-20.9077	-20.6264	-13.876	10.8445	-13.1936	4.06007
0.5711	0	520	0	530	0	525	0	535	0	535	0	535	0	535	0	535	0	525	0	535	0	535	0	535	0	0	531.538	1.43051	0.029	-26.8769	-24.0954	-16.6574	-21.314	0.21877	11.7196	-24.1892	-18.8451	-19.6889	-20.5952	-12.5946	11.032	-13.4905	3.91246
0.5811	0	520	0	530	0	525	0	535	0	535	0	535	0	535	0	535	0	525	0	535	0	535	0	535	0	0	531.538	1.43051	0.0295	-26.9394	-23.8141	-17.1887	-23.6579	1.15633	12.1883	-22.5953	-19.4076	-21.7515	-21.7828	-13.0634	9.31314	-13.9619	3.94169
0.5911	0	520	0	530	0	525	0	535	0	535	0	535	0	535	0	535	0	525	0	535	0	535	0	535	0	0	531.538	1.43051	0.03	-26.7831	-24.0329	-17.1887	-23.1891	2.50017	9.50066	-22.5016	-19.1263	-21.1577	-21.439	-14.4697	10.9695	-13.9098	3.90409
0.6011	0	520	0	530	0	525	0	535	0	535	0	535	0	535	0	535	0	525	0	535	0	535	0	535	0	0	531.538	1.43051	0.0305	-26.3768	-24.3142	-16.9387	-22.3453	3.25022	9.53191	-22.189	-20.0951	-20.9702	-22.0328	-12.9384	10.3445	-13.7562	3.89206
0.6112	0	520	0	530	0	525	0	535	0	535	0	535	0	535	0	535	0	525	0	535	0	535	0	535	0	0	531.538	1.43051	0.031	-26.8144	-23.9079	-16.6261	-22.9078	4.40655	7.40676	-22.1578	-18.8138	-20.4389	-21.4702	-12.9696	9.59441	-13.7249	3.78344
0.6212	0	520	0	530	0	525	0	535	0	535	0	535	0	535	0	535	0	525	0	535	0	535	0	535	0	0	531.538	1.43051	0.0315	-27.3144	-24.3142	-17.1887	-22.4391	4.46906	5.90666	-21.314	-19.5013	-22.4078	-21.1577	-12.8446	9.4069	-14.0583	3.75104
0.6312	0	520	0	530	0	525	0	535	0	535	0	535	0	535	0	535	0	525	0	535	0	535	0	535	0	0	531.538	1.43051	0.032	-27.2831	-24.4079	-16.6886	-23.6579	5.15661	6.00041	-21.8765	-19.7826	-22.3765	-20.8764	-14.9698	10.532	-14.1859	3.86077
0.6412	0	520	0	530	0	525	0	535	0	535	0	535	0	535	0	535	0	525	0	535	0	535	0	535	0	0	531.538	1.43051	0.0325	-27.0331	-24.6267	-17.5637	-22.5953	7.00048	2.09389	-21.0639	-19.0638	-21.939	-21.5327	-13.0321	10.9695	-14.0322	3.78305
0.6512	0	520	0	530	0	525	0	535	0	535	0	535	0	535	0	535	0	525	0	535	0	535	0	535	0	0	531.538	1.43051	0.033	-26.7519	-24.3767	-17.1887	-23.2516	5.46913	2.9377	-21.8453	-20.0326	-21.689	-21.7828	-13.7509	9.18813	-14.4229	3.67755
0.6612	0	520	0	530	0	525	0	535	0	535	0	535	0	535	0	535	0	525	0	535	0	535	0	535	0	0	531.538	1.43051	0.0335	-27.9394	-24.5329	-17.0324	-22.6891	5.93791	0.34377	-21.7515	-19.1263	-21.6265	-22.0015	-14.3135	9.71942	-14.5843	3.65187
0.6713	0	520	0	530	0	525	0	535	0	535	0	535	0	535	0	535	0	525	0	535	0	535	0	535	0	0	531.538	1.43051	0.034	-27.1894	-24.6892	-17.2512	-22.0953	5.43788	-0.6563	-21.5952	-20.3139	-21.5015	-20.9077	-14.9073	9.84443	-14.6521	3.57392
0.6813	0	520	0	530	0	525	0	535	0	535	0	535	0	535	0	535	0	525	0	535	0	535	0	535	0	0	531.538	1.43051	0.0345	-27.1269	-24.6267	-17.9075	-21.5327	5.53163	-1.31259	-19.7201	-21.5952	-22.1578	-20.7827	-13.8134	7.59427	-14.7875	3.43949
0.6913	0	520	0	530	0	525	0	535	0	535	0	535	0	535	0	535	0	525	0	535	0	535	0	535	0	0	531.538	1.43051	0.035	-27.3769	-24.783	-17.5637	-22.064	5.53163	-5.37537	-21.4702	-20.0014	-21.5015	-21.6265	-12.8446	9.03187	-15.0036	3.432
0.7013	0	520	0	530	0	525	0	535	0	535	0	535	0	535	0	535	0	525	0	535	0	535	0	535	0	0	531.538	1.43051	0.0355	-27.5644	-25.283	-18.0637	-22.1578	5.68789	-3.62525	-21.814	-20.0639	-22.1265	-21.814	-13.876	8.18807	-15.2094	3.46991
0.7113	0	520	0	530	0	525	0	535	0	535	0	535	0	535	0	535	0	525	0	535	0	535	0	535	0	0	531.538	1.43051	0.036	-27.7519	-24.2829	-17.3762	-21.4077	4.12528	-7.12549	-21.314	-21.189	-22.3765	-22.3765	-13.7822	8.93812	-15.4933	3.35056
0.7214	0	520	0	530	0	525	0	535	0	535	0	535	0	535	0	535	0	525	0	535	0	535	0	535	0	0	531.538	1.43051	0.0365	-27.4394	-25.033	-18.1575	-22.8766	4.50031	-6.18793	-21.6578	-20.8452	-22.314	-22.4391	-13.876	7.40676	-15.7433	3.33638
0.7314	0	520	0	530	0	525	0	535	0	535	0	535	0	535	0	535	0	525	0	535	0	535	0	535	0	0	531.538	1.43051	0.037	-27.9394	-24.5954	-17.8762	-22.4078	3.37523	-8.46933	-21.7828	-20.4077	-22.189	-19.9389	-13.4072	7.56302	-15.673	3.21038
0.7414	0	520	0	530	0	525	0	535	0	535	0	535	0	535	0	535	0	525	0	535	0	535	0	535	0	0	531.538	1.43051	0.0375	-28.1269	-24.908	-18.1888	-23.3141	2.53142	-9.68817	-20.4077	-22.7516	-21.939	-22.5641	-14.7198	6.06292	-16.5011	3.13427
0.7514	0	520	0	530	0	525	0	535	0	535	0	535	0	535	0	535	0	525	0	535	0	535	0	535	0	0	531.538	1.43051	0.038	-27.9394	-25.0017	-18.6888	-21.8453	1.87513	-9.28189	-22.8766	-19.5951	-22.8766	-22.6578	-14.1885	6.56295	-16.3761	3.12871
0.7614	0	520	0	530	0	525	0	535	0	535	0	535	0	535	0	535	0	525	0	535	0	535	0	535	0	0	531.538	1.43051	0.0385	-28.4395	-24.6267	-17.6887	-23.4079	0.25002	-9.50066	-22.6578	-22.6578	-22.9703	-20.4077	-14.126	6.09417	-16.6782	3.06001
0.7715	0	520	0	530	0	525	0	535	0	535	0	535	0	535	0	535	0	525	0	535	0	535	0	535	0	0	531.538	1.43051	0.039	-27.6894	-25.408	-18.7513	-23.8141	-1.68762	-11.0008	-20.8452	-20.8139	-22.3453	-21.7203	-14.1572	6.40669	-16.8189	2.93962
0.7815	0	520	0	530	0	525	0	535	0	535	0	535	0	535	0	535	0	525	0	535	0	535	0	535	0	0	531.538	1.43051	0.0395	-28.1895	-25.1892	-17.9387	-22.3453	-2.46892	-10.9383	-20.9077	-21.9078	-22.9703	-21.1265	-13.6884	6.93798	-16.7277	2.94489
0.7915	0	520	0	530	0	525	0	535	0	535	0	535	0	535	0	535	0	525	0	535	0	535	0	535	0	0	531.538	1.43051	0.04	-28.752	-25.033	-18.1575	-22.6891	-4.18779	-12.1883	-20.2827	-22.5328	-22.6266	-20.7827	-14.876	3.40649	-17.3918	2.65447
0.8015	0	520	0	530	0	525	0	535	0	535	0	535	0	535	0	535	0	525	0	535	0	535	0	535	0	0	531.538	1.43051	0.0405	-28.0332	-25.0642	-18.2825	-22.189	-6.4692	-12.5634	-23.0328	-21.7828	-23.0953	-20.9077	-15.1885	4.53156	-17.6731	2.63867
0.8115	0	520	0	530	0	525	0	535	0	535	0	535	0	535	0	535	0	525	0	535	0	535	0	535	0	0	531.538	1.43051	0.041	-28.752	-25.1892	-18.6263	-21.6578	-7.68803	-13.3134	-21.0014	-23.6266	-22.7516	-21.2827	-15.0323	3.53149	-17.9492	2.54619
0.8215	0	520	0	530	0	525	0	535	0	535	0	535	0	535	0	535	0	525	0	535	0	535	0	535	0	0	531.538	1.43051	0.0415	-28.6582	-25.1267	-18.3138	-22.1578	-8.37558	-13.7509	-21.1577	-20.3764	-22.9703	-22.8141	-15.0948	4.62532	-17.8476	2.57615
0.8316	0	520	0	530	0	525	0	535	0	535	0	535	0	535	0	535	0	525	0	535	0	535	0	535	0	0	531.538	1.43051	0.042	-28.752	-24.8142	-18.2513	-20.4702	-11.1883	-13.8447	-20.4077	-24.0329	-22.7828	-21.564	-15.3761	2.50017	-18.2487	2.36137
0.8416	0	520	0	530	0	525	0	535	0	535	0	535	0	535	0	535	0	525	0	535	0	535	0	535	0	0	531.538	1.43051	0.0425	-28.0957	-25.408	-18.1888	-20.1889	-12.0633	-15.3136	-20.3764	-20.6264	-23.6266	-22.0953	-15.8761	1.59386	-18.3554	2.22244
0.8516	0	520	0	530	0	525	0	535	0	535	0	535	0	535	0	535	0	525	0	535	0	535	0	535	0	0	531.538	1.43051	0.043	-28.9082	-25.5643	-18.7826	-21.1577	-13.4072	-14.8135	-20.9702	-24.0017	-23.9079	-22.0015	-15.3136	2.71894	-18.8424	2.37054
0.8616	0	520	0	530	0	525	0	535	0	535	0	535	0	535	0	535	0	525	0	535	0	535	0	535	0	0	531.538	1.43051	0.0435	-29.3145	-25.408	-18.5638	-21.6265	-15.3136	-15.251	-21.439	-22.0015	-23.3454	-22.4703	-15.3136	1.68762	-19.03	2.25231
0.8716	0	520	0	530	0	525	0	535	0	535	0	535	0	535	0	535	0	525	0	535	0	535	0	535	0	0	531.538	1.43051	0.044	-28.5645	-25.6268	-18.8451	-22.7516	-16.7199	-16.8449	-22.9078	-23.8454	-23.9392	-22.7828	-15.6886	1.68762	-19.7357	2.25166
0.8817	0	520	0	530	0	525	0	535	0	535	0	535	0	535	0	535	0	525	0	535	0	535	0	535	0	0	531.538	1.43051	0.0445	-28.9082	-25.6268	-19.3138	-22.5641	-18.1888	-15.9073	-20.9389	-22.8766	-25.3768	-21.439	-15.5011	-0.68755	-19.7774	2.07957
0.8917	0	520	0	530	0	525	0	535	0	535	0	535	0	535	0	535	0	525	0	535	0	535	0	535	0	0	531.538	1.43051	0.045	-29.0332	-26.0018	-19.1888	-23.4704	-19.0013	-17.1887	-21.0327	-23.0328	-24.0642	-21.6265	-16.3136	-0.59379	-20.0457	2.05754
0.9017	0	520	0	530	0	525	0	535	0	535	0	535	0	535	0	535	0	525	0	535	0	535	0	535	0	0	531.538	1.43051	0.0455	-28.4707	-26.0955	-19.5638	-22.3765	-20.0326	-16.3136	-20.0014	-23.3454	-25.408	-23.4704	-15.9386	0.09376	-20.0769	2.13379
0.9117	0	520	0	530	0	525	0	535	0	535	0	535	0	535	0	535	0	525	0	535	0	535	0	535	0	0	531.538	1.43051	0.046	-27.9394	-26.0643	-19.6263	-22.064	-21.2827	-17.8137	-22.0015	-23.3454	-24.3454	-21.2515	-15.1573	0.12501	-20.0639	2.08657
0.9217	0	520	0	530	0	525	0	535	0	535	0	535	0	535	0	535	0	525	0	535	0	535	0	535	0	0	531.538	1.43051	0.0465	-28.5645	-26.3768	-19.6576	-21.2827	-23.3766	-17.4387	-21.3452	-24.1579	-23.9704	-23.0016	-17.8137	-1.12508	-20.6759	2.00977
0.9318	0	520	0	530	0	525	0	535	0	535	0	535	0	535	0	535	0	525	0	535	0	535	0	535	0	0	531.538	1.43051	0.047	-29.1583	-26.0955	-19.5951	-21.5015	-23.6266	-17.4387	-20.4702	-23.9704	-25.1267	-23.0016	-15.8761	-1.84388	-20.642	2.01536
0.9418	0	520	0	530	0	525	0	535	0	535	0	535	0	535	0	535	0	525	0	535	0	535	0	535	0	0	531.538	1.43051	0.0475	-29.0645	-26.0643	-19.7826	-22.0328	-24.0017	-17.1887	-21.5327	-23.8141	-23.5016	-21.0327	-16.2824	-2.43767	-20.5613	1.93793
0.9518	0	520	0	530	0	525	0	535	0	535	0	535	0	535	0	535	0	525	0	535	0	535	0	535	0	0	531.538	1.43051	0.048	-29.3145	-25.8455	-19.3451	-21.939	-24.1892	-17.47	-20.4702	-23.6579	-24.5642	-22.4078	-17.0012	-2.8752	-20.7566	1.9162
0.9618	0	520	0	530	0	525	0	535	0	535	0	535	0	535	0	535	0	525	0	535	0	535	0	535	0	0	531.538	1.43051	0.0485	-29.1895	-26.6268	-19.6889	-21.8765	-24.5017	-17.1887	-20.5327	-23.6266	-24.5642	-21.189	-17.0637	-2.09389	-20.6785	1.98395
0.9718	0	520	0	530	0	525	0	535	0	535	0	535	0	535	0	535	0	525	0	535	0	535	0	535	0	0	531.538	1.43051	0.049	-29.7833	-26.0643	-19.2826	-21.939	-25.1892	-17.7512	-19.7201	-25.1267	-24.5642	-22.8141	-17.0949	-3.34398	-21.0561	1.93911
0.9819	0	520	0	530	0	525	0	535	0	535	0	535	0	535	0	535	0	525	0	535	0	535	0	535	0	0	531.538	1.43051	0.0495	-29.0645	-26.4706	-19.1888	-22.8766	-24.3767	-18.0637	-21.5015	-24.3454	-25.158	-21.8453	-17.345	-6.31294	-21.3791	1.69353
0.9919	0	520	0	530	0	525	0	535	0	535	0	535	0	535	0	535	0	525	0	535	0	535	0	535	0	0	531.538	1.43051	0.05	-29.6583	-26.1581	-19.8139	-22.3765	-25.3143	-18.1888	-19.5326	-25.6268	-25.1892	-22.4078	-19.5013	-6.84422	-21.7176	1.67634
1.0019	0	520	0	530	0	525	0	535	0	535	0	535	0	535	0	535	0	525	0	535	0	535	0	535	0	0	531.538	1.43051	0.0505	-28.9395	-26.6893	-19.8764	-22.2828	-25.6268	-17.7825	-19.9389	-24.3142	-26.033	-22.0953	-15.5948	-7.31301	-21.3739	1.70468
1.0119	0	520	0	530	0	525	0	535	0	535	0	535	0	535	0	535	0	525	0	535	0	535	0	535	0	0	531.538	1.43051	0.051	-29.5958	-26.4706	-19.8139	-22.5016	-26.6581	-18.4075	-18.1888	-23.8767	-24.3767	-22.3765	-17.72	-7.00048	-21.4155	1.6975
1.0219	0	520	0	530	0	525	0	535	0	535	0	535	0	535	0	535	0	525	0	535	0	535	0	535	0	0	531.538	1.43051	0.0515	-29.5645	-26.3768	-20.4389	-23.4079	-26.3143	-19.1576	-18.4388	-25.4393	-24.9392	-21.7515	-17.5325	-6.75047	-21.676	1.72317
1.0319	0	520	0	530	0	525	0	535	0	535	0	535	0	535	0	535	0	525	0	535	0	535	0	535	0	0	531.538	1.43051	0.052	-29.4708	-27.1269	-19.3451	-23.3766	-26.8456	-18.1575	-20.6577	-24.6892	-25.2205	-22.5328	-16.2511	-8.6881	-21.8635	1.64917
1.042	0	520	0	530	0	525	0	535	0	535	0	535	0	535	0	535	0	525	0	535	0	535	0	535	0	0	531.538	1.43051	0.0525	-29.6583	-27.0019	-19.6576	-24.8767	-26.9081	-17.1574	-18.9388	-25.033	-25.0642	-23.3766	-17.8762	-8.96937	-22.0432	1.65512
1.052	0	520	0	530	0	525	0	535	0	535	0	535	0	535	0	535	0	525	0	535	0	535	0	535	0	0	531.538	1.43051	0.053	-30.2833	-27.0019	-19.9701	-24.2204	-27.8457	-18.22	-19.5013	-25.5643	-25.0642	-23.3141	-18.22	-8.53184	-22.3114	1.68712
1.062	0	520	0	530	0	525	0	535	0	535	0	535	0	535	0	535	0	525	0	535	0	535	0	535	0	0	531.538	1.43051	0.0535	-29.7833	-26.9081	-20.1889	-23.1891	-27.3456	-18.9076	-20.2827	-24.4079	-25.0642	-22.7828	-17.7825	-10.1882	-22.2359	1.5148
1.072	0	520	0	530	0	525	0	535	0	535	0	535	0	535	0	535	0	525	0	535	0	535	0	535	0	0	531.538	1.43051	0.054	-29.4083	-27.3456	-19.5013	-22.3453	-27.8457	-17.9075	-19.3763	-25.533	-24.908	-22.5641	-18.095	-11.0633	-22.1578	1.51619
1.082	0	520	0	530	0	525	0	535	0	535	0	535	0	535	0	535	0	525	0	535	0	535	0	535	0	0	531.538	1.43051	0.0545	-29.6271	-27.1581	-20.3139	-22.7516	-28.3145	-18.9701	-18.8451	-24.9392	-25.3768	-22.0953	-18.5325	-10.6257	-22.2958	1.52651
1.0921	0	520	0	530	0	525	0	535	0	535	0	535	0	535	0	535	0	525	0	535	0	535	0	535	0	0	531.538	1.43051	0.055	-29.1895	-27.4081	-19.8764	-23.0953	-26.8456	-19.8139	-19.0638	-25.1892	-25.4705	-22.5641	-18.3138	-12.3446	-22.4312	1.37798
1.1021	0	520	0	530	0	525	0	535	0	535	0	535	0	535	0	535	0	525	0	535	0	535	0	535	0	0	531.538	1.43051	0.0555	-29.8458	-26.9081	-20.3764	-22.8453	-27.0956	-18.1262	-18.7826	-24.5954	-25.1267	-22.4391	-16.9074	-12.0633	-22.0927	1.46058
1.1121	0	520	0	530	0	525	0	535	0	535	0	535	0	535	0	535	0	525	0	535	0	535	0	535	0	0	531.538	1.43051	0.056	-30.1583	-27.2831	-20.1576	-23.0016	-26.8144	-19.6263	-18.9701	-24.9392	-26.1581	-24.1267	-20.1889	-12.9384	-22.8636	1.35891
1.1221	0	520	0	530	0	525	0	535	0	535	0	535	0	535	0	535	0	525	0	535	0	535	0	535	0	0	531.538	1.43051	0.0565	-30.1583	-27.4706	-20.4702	-23.5641	-26.1581	-18.7826	-17.9387	-24.9392	-26.4393	-23.0016	-17.7825	-14.3135	-22.5849	1.36937
1.1321	0	520	0	530	0	525	0	535	0	535	0	535	0	535	0	535	0	525	0	535	0	535	0	535	0	0	531.538	1.43051	0.057	-30.3146	-26.7831	-20.4077	-23.4079	-27.6269	-19.1888	-19.8139	-24.1892	-25.7518	-23.4079	-18.8763	-13.9697	-22.8115	1.31444
1.1422	0	520	0	530	0	525	0	535	0	535	0	535	0	535	0	535	0	525	0	535	0	535	0	535	0	0	531.538	1.43051	0.0575	-30.3458	-27.9707	-20.9389	-24.1892	-27.4706	-20.8764	-18.6888	-25.6893	-25.4393	-24.0642	-18.9388	-15.1885	-23.3167	1.28522
1.1522	0	520	0	530	0	525	0	535	0	535	0	535	0	535	0	535	0	525	0	535	0	535	0	535	0	0	531.538	1.43051	0.058	-30.3458	-27.8769	-20.5014	-24.1892	-27.5019	-18.5325	-17.47	-24.8455	-25.908	-22.9703	-18.6888	-15.5323	-22.8636	1.35457
1.1622	0	520	0	530	0	525	0	535	0	535	0	535	0	535	0	535	0	525	0	535	0	535	0	535	0	0	531.538	1.43051	0.0585	-30.5021	-28.0957	-20.5639	-24.5017	-28.1269	-20.6889	-17.8762	-26.6268	-25.908	-23.9079	-19.4076	-15.6886	-23.4912	1.33206
1.1722	0	520	0	530	0	525	0	535	0	535	0	535	0	535	0	535	0	525	0	535	0	535	0	535	0	0	531.538	1.43051	0.059	-30.3146	-27.7519	-20.3139	-23.5016	-28.1895	-17.845	-16.8137	-25.5018	-26.0955	-23.1891	-18.595	-16.8449	-22.913	1.3718
1.1822	0	520	0	530	0	525	0	535	0	535	0	535	0	535	0	535	0	525	0	535	0	535	0	535	0	0	531.538	1.43051	0.0595	-30.6271	-27.9394	-20.4077	-23.5329	-26.9706	-20.3139	-18.4388	-26.4393	-25.9393	-23.4391	-19.6263	-17.1887	-23.4053	1.22228
1.1922	0	520	0	530	0	525	0	535	0	535	0	535	0	535	0	535	0	525	0	535	0	535	0	535	0	0	531.538	1.43051	0.06	-30.3146	-28.0644	-20.6264	-22.9078	-27.1894	-18.3138	-17.8762	-25.5955	-24.5954	-23.0328	-18.8138	-15.8136	-22.762	1.31521
1.2023	0	520	0	530	0	525	0	535	0	535	0	535	0	535	0	535	0	525	0	535	0	535	0	535	0	0	531.538	1.43051	0.0605	-30.1271	-27.9707	-20.5952	-22.8766	-27.0019	-20.5327	-18.0637	-25.4705	-26.5643	-23.0953	-19.1263	-18.0325	-23.2881	1.18473
1.2123	0	520	0	530	0	525	0	535	0	535	0	535	0	535	0	535	0	525	0	535	0	535	0	535	0	0	531.538	1.43051	0.061	-30.0021	-27.5019	-20.8139	-21.939	-26.9394	-20.4077	-17.4387	-25.9705	-26.033	-21.8453	-19.0013	-17.97	-22.9886	1.19663
1.2223	0	520	0	530	0	525	0	535	0	535	0	535	0	535	0	535	0	525	0	535	0	535	0	535	0	0	531.538	1.43051	0.0615	-30.6271	-28.2832	-20.6577	-21.0014	-28.0957	-17.6887	-18.095	-25.783	-26.4393	-22.4078	-19.1888	-18.4075	-23.0563	1.31801
1.2323	0	520	0	530	0	525	0	535	0	535	0	535	0	535	0	535	0	525	0	535	0	535	0	535	0	0	531.538	1.43051	0.062	-30.9084	-27.6894	-20.6264	-22.6891	-27.6582	-21.3765	-18.4388	-26.1581	-26.3768	-22.8766	-19.5638	-18.595	-23.5798	1.18056
1.2423	0	520	0	530	0	525	0	535	0	535	0	535	0	535	0	535	0	525	0	535	0	535	0	535	0	0	531.538	1.43051	0.0625	-30.4083	-27.6582	-20.9389	-23.3454	-28.1582	-18.595	-19.5326	-25.5955	-26.4706	-22.1578	-19.9076	-20.0326	-23.5667	1.14478
1.2524	0	520	0	530	0	525	0	535	0	535	0	535	0	535	0	535	0	525	0	535	0	535	0	535	0	0	531.538	1.43051	0.063	-30.4708	-27.5957	-21.0952	-23.4391	-28.377	-21.0327	-17.7825	-26.1268	-26.7519	-23.5329	-21.1577	-21.2515	-24.0511	1.09437
1.2624	0	520	0	530	0	525	0	535	0	535	0	535	0	535	0	535	0	525	0	535	0	535	0	535	0	0	531.538	1.43051	0.0635	-30.8771	-28.1895	-21.0327	-22.6578	-26.7831	-19.5326	-17.7825	-24.9392	-26.5018	-22.189	-19.7826	-18.8138	-23.2568	1.20066
1.2724	0	520	0	530	0	525	0	535	0	535	0	535	0	535	0	535	0	525	0	535	0	535	0	535	0	0	531.538	1.43051	0.064	-30.5021	-28.1895	-20.9077	-24.4079	-28.0019	-20.5014	-16.6261	-26.8769	-26.0643	-23.6266	-19.6263	-20.5952	-23.8272	1.21614
1.2824	0	520	0	530	0	525	0	535	0	535	0	535	0	535	0	535	0	525	0	535	0	535	0	535	0	0	531.538	1.43051	0.0645	-30.1896	-28.5645	-20.7827	-24.2517	-27.3769	-20.0951	-16.5324	-24.8455	-27.3144	-23.0016	-19.5638	-19.1888	-23.4756	1.24377
1.2924	0	520	0	530	0	525	0	535	0	535	0	535	0	535	0	535	0	525	0	535	0	535	0	535	0	0	531.538	1.43051	0.065	-30.1896	-28.6895	-21.0327	-22.8141	-27.8457	-19.7826	-17.5637	-27.5019	-26.5331	-23.5329	-19.1888	-18.345	-23.585	1.2806
1.3025	0	520	0	530	0	525	0	535	0	535	0	535	0	535	0	535	0	525	0	535	0	535	0	535	0	0	531.538	1.43051	0.0655	-30.4083	-28.252	-21.0639	-22.8766	-28.8145	-20.9077	-17.3137	-25.9393	-26.7831	-24.1892	-19.7826	-19.8764	-23.8506	1.20775
1.3125	0	520	0	530	0	525	0	535	0	535	0	535	0	535	0	535	0	525	0	535	0	535	0	535	0	0	531.538	1.43051	0.066	-30.8459	-27.7519	-21.3452	-21.8453	-27.3769	-20.0639	-17.9075	-26.7519	-27.2519	-23.6266	-19.9701	-20.3764	-23.7595	1.17941
1.3225	0	520	0	530	0	525	0	535	0	535	0	535	0	535	0	535	0	525	0	535	0	535	0	535	0	0	531.538	1.43051	0.0665	-30.9396	-28.2832	-21.0014	-22.8453	-28.1582	-19.6889	-17.9075	-27.1894	-26.6893	-22.9391	-20.6577	-21.0952	-23.9496	1.1932
1.3325	0	520	0	530	0	525	0	535	0	535	0	535	0	535	0	535	0	525	0	535	0	535	0	535	0	0	531.538	1.43051	0.067	-31.0959	-28.0644	-21.189	-24.0954	-27.3144	-20.3764	-17.4387	-25.8455	-26.9706	-23.6266	-18.4388	-19.0013	-23.6214	1.25684
1.3425	0	520	0	530	0	525	0	535	0	535	0	535	0	535	0	535	0	525	0	535	0	535	0	535	0	0	531.538	1.43051	0.0675	-30.8459	-28.0644	-21.4702	-22.064	-27.6582	-20.6264	-17.1262	-26.9706	-25.8768	-23.1578	-19.4388	-22.314	-23.8011	1.17349
1.3526	0	520	0	530	0	525	0	535	0	535	0	535	0	535	0	535	0	525	0	535	0	535	0	535	0	0	531.538	1.43051	0.068	-30.3771	-28.8145	-21.564	-22.6891	-27.4394	-20.3764	-16.1574	-26.5643	-26.7519	-24.5642	-19.6263	-21.3452	-23.8558	1.22586
1.3626	0	520	0	530	0	525	0	535	0	535	0	535	0	535	0	535	0	525	0	535	0	535	0	535	0	0	531.538	1.43051	0.0685	-30.5021	-28.1269	-21.564	-23.4704	-27.1581	-20.9389	-17.5325	-27.1894	-27.1894	-23.2203	-21.0639	-20.5952	-24.0459	1.1276
1.3726	0	520	0	530	0	525	0	535	0	535	0	535	0	535	0	535	0	525	0	535	0	535	0	535	0	0	531.538	1.43051	0.069	-30.3146	-28.5332	-21.1265	-23.1578	-27.5331	-19.9389	-16.9074	-24.4392	-27.4394	-24.0017	-20.0639	-21.5015	-23.7464	1.17311
1.3826	0	520	0	530	0	525	0	535	0	535	0	535	0	535	0	535	0	525	0	535	0	535	0	535	0	0	531.538	1.43051	0.0695	-30.6271	-28.9395	-21.1577	-23.0953	-26.9394	-20.4702	-16.5011	-27.0019	-27.9707	-24.9392	-20.9702	-21.8453	-24.2048	1.21083
1.3926	0	520	0	530	0	525	0	535	0	535	0	535	0	535	0	535	0	525	0	535	0	535	0	535	0	0	531.538	1.43051	0.07	-30.0646	-28.752	-22.3765	-24.5954	-28.1269	-20.1576	-17.7825	-25.7205	-27.9707	-22.2203	-19.9389	-22.8141	-24.21	1.14173
1.4026	0	520	0	530	0	525	0	535	0	535	0	535	0	535	0	535	0	525	0	535	0	535	0	535	0	0	531.538	1.43051	0.0705	-30.5021	-28.3457	-21.5327	-23.2829	-26.4393	-20.3764	-17.1574	-26.7831	-28.1582	-24.1892	-19.1576	-21.3765	-23.9418	1.19668
1.4127	0	520	0	530	0	525	0	535	0	535	0	535	0	535	0	535	0	525	0	535	0	535	0	535	0	0	531.538	1.43051	0.071	-30.8771	-28.5332	-21.7515	-24.9705	-26.9706	-20.3764	-16.4386	-26.3143	-27.5019	-23.7829	-20.1264	-23.0328	-24.223	1.18699
1.4227	0	520	0	530	0	525	0	535	0	535	0	535	0	535	0	535	0	525	0	535	0	535	0	535	0	0	531.538	1.43051	0.0715	-31.2522	-28.752	-21.8765	-24.4079	-27.9082	-19.9701	-16.3761	-26.9706	-28.0957	-22.4703	-20.5327	-22.4391	-24.2543	1.26464
1.4327	0	520	0	530	0	525	0	535	0	535	0	535	0	535	0	535	0	525	0	535	0	535	0	535	0	0	531.538	1.43051	0.072	-31.0646	-28.9707	-21.689	-25.3455	-26.6268	-20.4077	-17.9075	-27.1894	-27.5331	-23.6266	-20.6264	-21.8453	-24.4027	1.15327
1.4427	0	520	0	530	0	525	0	535	0	535	0	535	0	535	0	535	0	525	0	535	0	535	0	535	0	0	531.538	1.43051	0.0725	-31.3459	-28.6895	-21.689	-25.158	-27.4081	-20.8452	-15.9073	-26.1581	-26.7519	-23.7829	-19.7826	-22.3765	-24.1579	1.23734
1.4527	0	520	0	530	0	525	0	535	0	535	0	535	0	535	0	535	0	525	0	535	0	535	0	535	0	0	531.538	1.43051	0.073	-31.0959	-28.6895	-21.189	-24.0329	-27.1269	-20.1889	-16.2511	-28.252	-27.1269	-23.4704	-20.4389	-21.7203	-24.1319	1.26251
1.4628	0	520	0	530	0	525	0	535	0	535	0	535	0	535	0	535	0	525	0	535	0	535	0	535	0	0	531.538	1.43051	0.0735	-30.8459	-29.3458	-21.439	-22.4391	-27.8144	-21.0952	-15.7511	-26.4081	-27.3769	-24.0642	-20.6264	-22.314	-24.1267	1.25139
1.4728	0	520	0	530	0	525	0	535	0	535	0	535	0	535	0	535	0	525	0	535	0	535	0	535	0	0	531.538	1.43051	0.074	-30.5646	-28.6895	-21.8765	-23.5641	-27.1269	-20.3764	-16.2824	-26.0955	-27.8769	-24.3454	-22.0953	-23.0328	-24.3272	1.15166
1.4828	0	520	0	530	0	525	0	535	0	535	0	535	0	535	0	535	0	525	0	535	0	535	0	535	0	0	531.538	1.43051	0.0745	-31.4397	-29.4708	-21.9703	-23.6266	-27.1269	-21.1265	-16.4699	-27.1269	-27.4394	-23.8454	-20.6889	-21.8453	-24.348	1.23109
1.4928	0	520	0	530	0	525	0	535	0	535	0	535	0	535	0	535	0	525	0	535	0	535	0	535	0	0	531.538	1.43051	0.075	-30.9396	-29.0645	-21.8765	-23.5641	-26.5643	-20.8139	-17.0637	-27.6582	-28.0332	-24.5329	-20.4077	-22.7516	-24.4392	1.18522
1.5028	0	520	0	530	0	525	0	535	0	535	0	535	0	535	0	535	0	525	0	535	0	535	0	535	0	0	531.538	1.43051	0.0755	-31.4709	-28.6895	-21.564	-24.0329	-27.1894	-21.1265	-14.9385	-26.3456	-27.2519	-25.1892	-21.4702	-24.1579	-24.4522	1.24846
1.5129	0	520	0	530	0	525	0	535	0	535	0	535	0	535	0	535	0	525	0	535	0	535	0	535	0	0	531.538	1.43051	0.076	-31.4709	-28.8145	-21.814	-24.5954	-28.0019	-20.5639	-16.0324	-25.658	-28.627	-25.3455	-21.189	-23.5954	-24.6423	1.24473
1.5229	0	520	0	530	0	525	0	535	0	535	0	535	0	535	0	535	0	525	0	535	0	535	0	535	0	0	531.538	1.43051	0.0765	-31.0021	-29.0645	-22.0953	-25.3143	-26.9394	-20.7827	-15.8136	-26.2518	-29.252	-24.4704	-21.3452	-24.3142	-24.7205	1.23041
1.5329	0	520	0	530	0	525	0	535	0	535	0	535	0	535	0	535	0	525	0	535	0	535	0	535	0	0	531.538	1.43051	0.077	-31.4084	-29.0332	-22.8141	-25.3143	-27.5019	-20.1889	-15.1885	-27.3456	-29.0645	-25.8455	-20.7514	-23.5954	-24.8377	1.32095
1.5429	0	520	0	530	0	525	0	535	0	535	0	535	0	535	0	535	0	525	0	535	0	535	0	535	0	0	531.538	1.43051	0.0775	-30.8146	-29.002	-22.314	-24.908	-26.1893	-20.8764	-17.0324	-27.4394	-29.3145	-24.0642	-21.4702	-23.7829	-24.7673	1.1602
1.5529	0	520	0	530	0	525	0	535	0	535	0	535	0	535	0	535	0	525	0	535	0	535	0	535	0	0	531.538	1.43051	0.078	-31.4709	-28.7832	-22.5953	-25.408	-27.1581	-22.0015	-16.6886	-26.0955	-27.7832	-24.4392	-19.9076	-24.1579	-24.7074	1.16689
1.5629	0	520	0	530	0	525	0	535	0	535	0	535	0	535	0	535	0	525	0	535	0	535	0	535	0	0	531.538	1.43051	0.0785	-30.8146	-29.2833	-21.8765	-26.1268	-26.8144	-20.5952	-15.9698	-27.3456	-28.1582	-24.5017	-20.9389	-23.7829	-24.684	1.23067
1.573	0	520	0	530	0	525	0	535	0	535	0	535	0	535	0	535	0	525	0	535	0	535	0	535	0	0	531.538	1.43051	0.079	-31.5959	-29.4083	-23.1578	-25.8455	-25.9705	-20.7202	-15.8761	-28.1895	-27.6269	-24.3454	-21.189	-23.2516	-24.7647	1.24307
1.583	0	520	0	530	0	525	0	535	0	535	0	535	0	535	0	535	0	525	0	535	0	535	0	535	0	0	531.538	1.43051	0.0795	-30.5021	-29.0332	-21.7203	-23.8141	-27.3144	-21.7515	-14.876	-25.5643	-27.1894	-24.1892	-23.5016	-23.3141	-24.3975	1.17939
1.593	0	520	0	530	0	525	0	535	0	535	0	535	0	535	0	535	0	525	0	535	0	535	0	535	0	0	531.538	1.43051	0.08	-30.9709	-29.6896	-22.3453	-24.9705	-26.7519	-20.6577	-16.0324	-25.8143	-29.4395	-24.783	-20.7827	-23.4079	-24.6371	1.24983
1.603	0	520	0	530	0	525	0	535	0	535	0	535	0	535	0	535	0	525	0	535	0	535	0	535	0	0	531.538	1.43051	0.0805	-31.0021	-29.252	-22.189	-23.8454	-27.1894	-21.3765	-16.0949	-27.3456	-27.8769	-25.3768	-21.2827	-25.0955	-24.8272	1.19327
1.613	0	520	0	530	0	525	0	535	0	535	0	535	0	535	0	535	0	525	0	535	0	535	0	535	0	0	531.538	1.43051	0.081	-30.4708	-28.8457	-22.189	-24.3767	-26.9394	-20.6577	-16.1886	-27.1894	-28.0957	-24.783	-20.8764	-23.0641	-24.473	1.18421
1.6231	0	520	0	530	0	525	0	535	0	535	0	535	0	535	0	535	0	525	0	535	0	535	0	535	0	0	531.538	1.43051	0.0815	-31.0021	-29.4083	-22.3765	-23.1891	-26.8456	-21.1265	-16.5636	-25.6893	-27.8769	-24.1579	-21.1577	-23.0328	-24.3689	1.16293
1.6331	0	520	0	530	0	525	0	535	0	535	0	535	0	535	0	535	0	525	0	535	0	535	0	535	0	0	531.538	1.43051	0.082	-31.4397	-29.127	-22.5016	-23.5954	-25.6268	-20.6264	-16.8137	-26.3456	-28.0332	-25.8143	-21.2827	-24.0642	-24.6059	1.16045
1.6431	0	520	0	530	0	525	0	535	0	535	0	535	0	535	0	535	0	525	0	535	0	535	0	535	0	0	531.538	1.43051	0.0825	-31.2522	-29.4395	-22.5328	-25.0017	-27.1269	-21.0014	-16.3136	-27.4394	-27.1894	-24.8142	-21.814	-24.8142	-24.8949	1.17319
1.6531	0	520	0	530	0	525	0	535	0	535	0	535	0	535	0	535	0	525	0	535	0	535	0	535	0	0	531.538	1.43051	0.083	-31.1584	-29.4083	-23.1891	-25.5955	-27.1894	-21.189	-17.1887	-26.8144	-28.4082	-25.3455	-22.5016	-25.6268	-25.3012	1.10748
1.6631	0	520	0	530	0	525	0	535	0	535	0	535	0	535	0	535	0	525	0	535	0	535	0	535	0	0	531.538	1.43051	0.0835	-31.0021	-29.6583	-22.5016	-24.6892	-27.0956	-20.9389	-15.8448	-27.7207	-28.6895	-25.0642	-19.9389	-24.4392	-24.7986	1.27691
1.6732	0	520	0	530	0	525	0	535	0	535	0	535	0	535	0	535	0	525	0	535	0	535	0	535	0	0	531.538	1.43051	0.084	-31.0334	-29.4083	-22.5953	-26.1268	-26.3456	-22.0328	-15.8136	-26.9081	-27.8144	-24.8767	-21.4702	-24.4079	-24.9028	1.17475
1.6832	0	520	0	530	0	525	0	535	0	535	0	535	0	535	0	535	0	525	0	535	0	535	0	535	0	0	531.538	1.43051	0.0845	-31.1272	-29.8771	-23.3141	-24.5017	-26.9706	-20.0639	-16.3136	-28.0644	-28.4395	-25.3768	-21.5952	-24.3454	-24.9991	1.23553
1.6932	0	520	0	530	0	525	0	535	0	535	0	535	0	535	0	535	0	525	0	535	0	535	0	535	0	0	531.538	1.43051	0.085	-30.6896	-29.4395	-22.7516	-23.8141	-26.5643	-22.8141	-14.0635	-26.6581	-28.1895	-24.6267	-21.5327	-24.3142	-24.6215	1.25894
1.7032	0	520	0	530	0	525	0	535	0	535	0	535	0	535	0	535	0	525	0	535	0	535	0	535	0	0	531.538	1.43051	0.0855	-31.3147	-29.502	-22.7203	-24.0954	-26.0018	-20.4077	-15.5011	-27.1269	-27.8457	-24.8767	-21.4702	-24.1892	-24.5876	1.23765
1.7132	0	520	0	530	0	525	0	535	0	535	0	535	0	535	0	535	0	525	0	535	0	535	0	535	0	0	531.538	1.43051	0.086	-31.1584	-29.1895	-23.0641	-24.9705	-26.7831	-22.4703	-16.3136	-27.2831	-27.8144	-24.908	-21.8765	-27.5331	-25.2804	1.14359
1.7232	0	520	0	530	0	525	0	535	0	535	0	535	0	535	0	535	0	525	0	535	0	535	0	535	0	0	531.538	1.43051	0.0865	-30.2521	-29.6896	-23.3141	-25.4705	-25.908	-22.5641	-13.6259	-26.5018	-28.502	-24.7205	-21.5952	-25.033	-24.7647	1.27414
1.7333	0	520	0	530	0	525	0	535	0	535	0	535	0	535	0	535	0	525	0	535	0	535	0	535	0	0	531.538	1.43051	0.087	-30.3771	-29.7833	-23.1891	-24.1579	-26.5018	-20.4077	-15.7823	-28.3457	-28.1895	-24.9392	-21.4702	-23.1891	-24.6944	1.23116
1.7433	0	520	0	530	0	525	0	535	0	535	0	535	0	535	0	535	0	525	0	535	0	535	0	535	0	0	531.538	1.43051	0.0875	-31.1272	-29.6583	-23.5641	-25.0955	-26.5643	-23.1578	-15.6573	-25.5018	-29.127	-23.8454	-21.6265	-24.4392	-24.947	1.18295
1.7533	0	520	0	530	0	525	0	535	0	535	0	535	0	535	0	535	0	525	0	535	0	535	0	535	0	0	531.538	1.43051	0.088	-31.0646	-29.5333	-22.7516	-25.1892	-26.9081	-19.5638	-15.0323	-28.377	-29.8458	-24.8142	-21.7828	-24.6892	-24.9627	1.3493
1.7633	0	520	0	530	0	525	0	535	0	535	0	535	0	535	0	535	0	525	0	535	0	535	0	535	0	0	531.538	1.43051	0.0885	-31.0021	-29.4708	-23.1891	-22.5641	-27.8457	-23.3454	-14.3135	-27.1894	-28.627	-25.4705	-21.189	-24.0329	-24.8533	1.30161
1.7733	0	520	0	530	0	525	0	535	0	535	0	535	0	535	0	535	0	525	0	535	0	535	0	535	0	0	531.538	1.43051	0.089	-31.4709	-29.5333	-22.7828	-23.2829	-25.8455	-20.1576	-15.2823	-26.5331	-28.3457	-26.1893	-22.8766	-24.4704	-24.7309	1.25458
1.7834	0	520	0	530	0	525	0	535	0	535	0	535	0	535	0	535	0	525	0	535	0	535	0	535	0	0	531.538	1.43051	0.0895	-31.0334	-29.5333	-22.6578	-26.0018	-27.0331	-22.0015	-15.2823	-27.6269	-26.6581	-25.5643	-22.189	-23.9392	-24.9601	1.19967
1.7934	0	520	0	530	0	525	0	535	0	535	0	535	0	535	0	535	0	525	0	535	0	535	0	535	0	0	531.538	1.43051	0.09	-30.8771	-29.6271	-23.1891	-24.6267	-25.9393	-22.2828	-15.1885	-26.9081	-29.377	-24.5017	-21.8453	-23.7516	-24.8429	1.22524
1.8034	0	520	0	530	0	525	0	535	0	535	0	535	0	535	0	535	0	525	0	535	0	535	0	535	0	0	531.538	1.43051	0.0905	-30.3771	-29.7208	-23.3141	-25.658	-27.1269	-20.8764	-13.1259	-28.3145	-28.9707	-24.8455	-22.1265	-26.0643	-25.0434	1.38482
1.8134	0	520	0	530	0	525	0	535	0	535	0	535	0	535	0	535	0	525	0	535	0	535	0	535	0	0	531.538	1.43051	0.091	-30.8146	-29.9083	-23.0641	-25.6268	-27.2831	-22.4391	-14.4072	-26.3768	-28.7207	-24.6267	-21.7203	-23.7204	-24.8923	1.27373
1.8234	0	520	0	530	0	525	0	535	0	535	0	535	0	535	0	535	0	525	0	535	0	535	0	535	0	0	531.538	1.43051	0.0915	-31.1897	-29.7208	-22.9391	-27.4706	-26.7519	-21.3452	-14.7198	-29.2833	-28.9707	-25.033	-21.564	-24.4704	-25.2882	1.34351
1.8335	0	520	0	530	0	525	0	535	0	535	0	535	0	535	0	535	0	525	0	535	0	535	0	535	0	0	531.538	1.43051	0.092	-30.8771	-29.7833	-23.2516	-26.0955	-26.1893	-21.439	-13.0321	-26.4393	-27.8457	-24.3454	-20.8452	-24.1579	-24.5251	1.362
1.8435	0	520	0	530	0	525	0	535	0	535	0	535	0	535	0	535	0	525	0	535	0	535	0	535	0	0	531.538	1.43051	0.0925	-30.9084	-29.4083	-23.4391	-26.6581	-26.2831	-21.3765	-15.5011	-28.3457	-28.6582	-24.1267	-23.4391	-25.1892	-25.2778	1.20422
1.8535	0	520	0	530	0	525	0	535	0	535	0	535	0	535	0	535	0	525	0	535	0	535	0	535	0	0	531.538	1.43051	0.093	-31.0646	-29.8771	-22.7516	-26.4081	-26.6893	-21.7828	-14.4385	-26.8144	-28.877	-24.1892	-22.064	-25.0642	-25.0017	1.29087
1.8635	0	520	0	530	0	525	0	535	0	535	0	535	0	535	0	535	0	525	0	535	0	535	0	535	0	0	531.538	1.43051	0.0935	-31.1897	-29.6271	-23.6266	-25.6268	-25.408	-22.064	-14.7198	-28.2832	-28.8145	-23.3766	-21.9078	-25.3455	-24.9991	1.27361
1.8735	0	520	0	530	0	525	0	535	0	535	0	535	0	535	0	535	0	525	0	535	0	535	0	535	0	0	531.538	1.43051	0.094	-30.9396	-29.9083	-23.7829	-25.9393	-26.0018	-21.7515	-13.4384	-26.5018	-28.752	-24.1892	-22.5953	-25.783	-24.9653	1.32096
1.8836	0	520	0	530	0	525	0	535	0	535	0	535	0	535	0	535	0	525	0	535	0	535	0	535	0	0	531.538	1.43051	0.0945	-30.7521	-30.0958	-23.1266	-26.0955	-25.8455	-21.689	-14.0947	-28.3145	-28.5645	-23.9704	-20.9077	-23.5329	-24.7491	1.34069
1.8936	0	520	0	530	0	525	0	535	0	535	0	535	0	535	0	535	0	525	0	535	0	535	0	535	0	0	531.538	1.43051	0.095	-30.5646	-30.0958	-23.8767	-25.408	-26.1268	-21.0014	-14.0947	-27.6894	-29.1895	-24.783	-22.0328	-25.0955	-24.9965	1.3148
1.9036	0	520	0	530	0	525	0	535	0	535	0	535	0	535	0	535	0	525	0	535	0	535	0	535	0	0	531.538	1.43051	0.0955	-30.9084	-29.7521	-23.1891	-26.1581	-26.3768	-21.939	-13.9697	-27.8144	-29.3458	-24.7517	-22.5016	-25.3768	-25.1736	1.31407
1.9136	0	520	0	530	0	525	0	535	0	535	0	535	0	535	0	535	0	525	0	535	0	535	0	535	0	0	531.538	1.43051	0.096	-30.5959	-29.5958	-23.2829	-26.4393	-25.4705	-22.3765	-13.4697	-27.5957	-27.8769	-24.3454	-23.0641	-25.1892	-24.9418	1.28125
1.9236	0	520	0	530	0	525	0	535	0	535	0	535	0	535	0	535	0	525	0	535	0	535	0	535	0	0	531.538	1.43051	0.0965	-30.8146	-29.7521	-24.1267	-26.7831	-26.6268	-22.1578	-14.376	-28.5957	-28.502	-25.658	-22.2828	-25.033	-25.3924	1.27651
1.9336	0	520	0	530	0	525	0	535	0	535	0	535	0	535	0	535	0	525	0	535	0	535	0	535	0	0	531.538	1.43051	0.097	-30.1896	-29.8771	-23.3766	-25.0017	-26.5956	-22.1265	-14.4385	-26.8456	-28.6582	-25.283	-22.2828	-25.4393	-25.0095	1.23136
1.9437	0	520	0	530	0	525	0	535	0	535	0	535	0	535	0	535	0	525	0	535	0	535	0	535	0	0	531.538	1.43051	0.0975	-30.3146	-30.1271	-23.5641	-27.4081	-26.3768	-22.5641	-15.1885	-26.5956	-29.7521	-24.6267	-22.8141	-23.3454	-25.2231	1.22682
1.9537	0	520	0	530	0	525	0	535	0	535	0	535	0	535	0	535	0	525	0	535	0	535	0	535	0	0	531.538	1.43051	0.098	-31.0021	-30.0958	-23.2829	-27.5644	-26.7519	-22.9703	-15.5948	-28.4395	-29.3458	-25.9393	-21.0327	-25.6268	-25.6372	1.26138
1.9637	0	520	0	530	0	525	0	535	0	535	0	535	0	535	0	535	0	525	0	535	0	535	0	535	0	0	531.538	1.43051	0.0985	-31.4084	-30.1896	-24.0954	-27.2831	-27.1894	-22.0953	-15.2823	-27.2519	-28.5645	-25.3455	-21.8765	-25.908	-25.5408	1.25125
1.9737	0	520	0	530	0	525	0	535	0	535	0	535	0	535	0	535	0	525	0	535	0	535	0	535	0	0	531.538	1.43051	0.099	-31.0646	-30.1271	-23.2203	-27.8457	-25.5955	-22.4078	-14.626	-27.6269	-29.8771	-23.6266	-22.4703	-25.658	-25.3455	1.31137
1.9837	0	520	0	530	0	525	0	535	0	535	0	535	0	535	0	535	0	525	0	535	0	535	0	535	0	0	531.538	1.43051	0.0995	-30.7521	-30.1271	-23.0641	-26.3768	-25.658	-21.8765	-14.6885	-27.7207	-29.5645	-25.5643	-24.4704	-25.6893	-25.4627	1.25612
1.9938	0	520	0	530	0	525	0	535	0	535	0	535	0	535	0	535	0	525	0	535	0	535	0	535	0	0	531.538	1.43051	0.1	-30.3771	-29.9083	-23.3141	-26.1893	-24.9705	-21.4702	-15.3136	-27.0019	-28.8457	-24.1892	-22.3765	-25.7518	-24.9757	1.20115
2.0038	0	520	0	530	0	525	0	535	0	535	0	535	0	535	0	535	0	525	0	535	0	535	0	535	0	0	531.538	1.43051	0.1005	-30.6271	-29.8771	-23.0016	-26.4081	-25.158	-21.6265	-14.1885	-28.0019	-28.9707	-24.3142	-22.8141	-24.8142	-24.9835	1.29035
2.0138	0	520	0	530	0	525	0	535	0	535	0	535	0	535	0	535	0	525	0	535	0	535	0	535	0	0	531.538	1.43051	0.101	-30.0958	-30.0333	-23.1891	-25.533	-26.4393	-21.5952	-15.0948	-28.1269	-29.002	-24.6892	-22.6891	-24.6892	-25.0981	1.22429
2.0238	0	520	0	530	0	525	0	535	0	535	0	535	0	535	0	535	0	525	0	535	0	535	0	535	0	0	531.538	1.43051	0.1015	-30.7834	-29.8458	-23.1891	-26.1581	-26.9081	-21.4702	-14.626	-26.8769	-28.2832	-24.2517	-22.1578	-27.5331	-25.1736	1.27406
2.0338	0	520	0	530	0	525	0	535	0	535	0	535	0	535	0	535	0	525	0	535	0	535	0	535	0	0	531.538	1.43051	0.102	-30.5959	-30.0646	-23.5954	-25.1892	-25.9393	-22.3765	-15.1573	-28.5332	-28.877	-24.1892	-22.3453	-25.0955	-25.1632	1.22637
2.0439	0	520	0	530	0	525	0	535	0	535	0	535	0	535	0	535	0	525	0	535	0	535	0	535	0	0	531.538	1.43051	0.1025	-30.8459	-29.5333	-22.9078	-25.908	-25.658	-22.4703	-14.7823	-28.5332	-28.5957	-25.1892	-21.939	-24.9392	-25.1085	1.24876
2.0539	0	520	0	530	0	525	0	535	0	535	0	535	0	535	0	535	0	525	0	535	0	535	0	535	0	0	531.538	1.43051	0.103	-30.9709	-29.6896	-22.3765	-26.0643	-23.6891	-22.1265	-14.1572	-27.6269	-29.3145	-25.4393	-23.0953	-25.9393	-25.0408	1.30093
2.0639	0	520	0	530	0	525	0	535	0	535	0	535	0	535	0	535	0	525	0	535	0	535	0	535	0	0	531.538	1.43051	0.1035	-30.9396	-29.502	-23.5641	-26.0955	-26.8769	-21.8765	-14.001	-27.4081	-29.1583	-25.7518	-22.8453	-26.3456	-25.3637	1.29565
2.0739	0	520	0	530	0	525	0	535	0	535	0	535	0	535	0	535	0	525	0	535	0	535	0	535	0	0	531.538	1.43051	0.104	-30.4396	-29.3145	-22.7516	-27.5331	-25.1892	-21.439	-15.1573	-27.1581	-29.1895	-25.783	-22.9703	-25.5643	-25.2075	1.21859
2.0839	0	520	0	530	0	525	0	535	0	535	0	535	0	535	0	535	0	525	0	535	0	535	0	535	0	0	531.538	1.43051	0.1045	-31.2522	-29.8458	-23.0641	-26.4081	-25.533	-22.5016	-14.6573	-27.0956	-28.7832	-22.9703	-22.9078	-26.2831	-25.1085	1.26283
2.0939	0	520	0	530	0	525	0	535	0	535	0	535	0	535	0	535	0	525	0	535	0	535	0	535	0	0	531.538	1.43051	0.105	-31.4709	-29.8771	-22.8766	-26.6893	-25.783	-21.7828	-15.001	-27.8769	-29.9083	-25.7518	-21.9703	-26.033	-25.4184	1.30571
2.104	0	520	0	530	0	525	0	535	0	535	0	535	0	535	0	535	0	525	0	535	0	535	0	535	0	0	531.538	1.43051	0.1055	-30.8459	-29.7521	-22.9391	-26.5018	-25.8455	-21.2827	-13.7197	-28.377	-28.4082	-24.3767	-22.3765	-26.4081	-25.0694	1.34066
2.114	0	520	0	530	0	525	0	535	0	535	0	535	0	535	0	535	0	525	0	535	0	535	0	535	0	0	531.538	1.43051	0.106	-31.0021	-29.2833	-23.1891	-27.4081	-24.5954	-21.0639	-15.4073	-28.0332	-29.0645	-24.5017	-22.4703	-26.0955	-25.1762	1.24414
2.124	0	520	0	530	0	525	0	535	0	535	0	535	0	535	0	535	0	525	0	535	0	535	0	535	0	0	531.538	1.43051	0.1065	-31.1272	-30.0646	-23.8767	-26.8769	-25.8768	-22.4703	-14.001	-28.6895	-29.1583	-24.5642	-23.6579	-24.6892	-25.421	1.31134
2.134	0	520	0	530	0	525	0	535	0	535	0	535	0	535	0	535	0	525	0	535	0	535	0	535	0	0	531.538	1.43051	0.107	-31.0334	-29.9396	-22.7828	-26.6893	-25.8143	-21.4077	-15.1573	-27.9394	-28.3457	-23.7829	-23.0953	-24.6267	-25.0512	1.24337
2.144	0	520	0	530	0	525	0	535	0	535	0	535	0	535	0	535	0	525	0	535	0	535	0	535	0	0	531.538	1.43051	0.1075	-31.3459	-30.1896	-23.5329	-27.8457	-25.0642	-21.0639	-13.4697	-27.3144	-28.627	-24.6579	-22.5328	-24.2517	-24.9913	1.37943
2.1541	0	520	0	530	0	525	0	535	0	535	0	535	0	535	0	535	0	525	0	535	0	535	0	535	0	0	531.538	1.43051	0.108	-30.9396	-30.0333	-23.3141	-24.2829	-26.4393	-21.4702	-15.6261	-29.1895	-29.6271	-25.0955	-22.189	-25.908	-25.3429	1.26927
2.1641	0	520	0	530	0	525	0	535	0	535	0	535	0	535	0	535	0	525	0	535	0	535	0	535	0	0	531.538	1.43051	0.1085	-31.4397	-30.2833	-23.3766	-24.6892	-25.8143	-21.9703	-14.751	-27.0956	-28.9395	-24.7517	-23.3766	-24.8767	-25.1137	1.25971
2.1741	0	520	0	530	0	525	0	535	0	535	0	535	0	535	0	535	0	525	0	535	0	535	0	535	0	0	531.538	1.43051	0.109	-31.4397	-29.7833	-23.9704	-25.6268	-25.3455	-21.439	-14.9385	-28.1895	-28.4707	-24.5954	-21.5327	-26.1893	-25.1267	1.27761
2.1841	0	520	0	530	0	525	0	535	0	535	0	535	0	535	0	535	0	525	0	535	0	535	0	535	0	0	531.538	1.43051	0.1095	-31.0334	-30.0646	-23.4079	-26.5331	-25.533	-22.6891	-14.9385	-28.0019	-30.0333	-24.6267	-22.4391	-25.283	-25.382	1.27079
2.1941	0	520	0	530	0	525	0	535	0	535	0	535	0	535	0	535	0	525	0	535	0	535	0	535	0	0	531.538	1.43051	0.11	-31.4709	-30.3771	-23.5641	-26.8456	-24.2517	-20.9077	-14.1885	-27.6894	-29.8771	-24.5954	-23.5016	-25.1892	-25.2049	1.35794
2.2042	0	520	0	530	0	525	0	535	0	535	0	535	0	535	0	535	0	525	0	535	0	535	0	535	0	0	531.538	1.43051	0.1105	-31.7522	-30.4396	-23.4079	-26.5331	-25.283	-22.4703	-14.5635	-28.0644	-29.0958	-25.0017	-22.5953	-25.9393	-25.4288	1.30874
2.2142	0	520	0	530	0	525	0	535	0	535	0	535	0	535	0	535	0	525	0	535	0	535	0	535	0	0	531.538	1.43051	0.111	-31.1897	-30.6584	-23.2829	-27.5019	-24.9392	-21.3452	-15.9386	-28.0019	-30.3458	-25.408	-22.0953	-26.6268	-25.6111	1.28913
2.2242	0	520	0	530	0	525	0	535	0	535	0	535	0	535	0	535	0	525	0	535	0	535	0	535	0	0	531.538	1.43051	0.1115	-30.9709	-30.1271	-23.6579	-26.0643	-25.033	-21.8765	-14.7823	-28.1895	-29.0332	-24.1892	-22.8766	-25.4705	-25.1892	1.2626
2.2342	0	520	0	530	0	525	0	535	0	535	0	535	0	535	0	535	0	525	0	535	0	535	0	535	0	0	531.538	1.43051	0.112	-31.7834	-30.6896	-23.6891	-27.7207	-25.283	-22.5016	-14.876	-29.002	-29.0958	-23.7204	-22.8453	-25.5018	-25.5591	1.32544
2.2442	0	520	0	530	0	525	0	535	0	535	0	535	0	535	0	535	0	525	0	535	0	535	0	535	0	0	531.538	1.43051	0.1125	-31.3459	-30.4708	-23.0016	-28.877	-26.2518	-21.0952	-14.9385	-27.6894	-29.1895	-26.1893	-23.4079	-26.6268	-25.757	1.3251
2.2543	0	520	0	530	0	525	0	535	0	535	0	535	0	535	0	535	0	525	0	535	0	535	0	535	0	0	531.538	1.43051	0.113	-31.5647	-30.3458	-23.8767	-28.377	-24.9705	-21.939	-13.2509	-27.7207	-29.5333	-26.2206	-23.1578	-26.5643	-25.6268	1.4097
2.2643	0	520	0	530	0	525	0	535	0	535	0	535	0	535	0	535	0	525	0	535	0	535	0	535	0	0	531.538	1.43051	0.1135	-30.8146	-30.2521	-23.5329	-28.5957	-25.033	-20.4389	-14.8448	-28.1269	-29.1583	-24.0329	-22.6891	-25.0017	-25.2101	1.32923
2.2743	0	520	0	530	0	525	0	535	0	535	0	535	0	535	0	535	0	525	0	535	0	535	0	535	0	0	531.538	1.43051	0.114	-29.9396	-30.1896	-24.5329	-27.4081	-25.3768	-21.814	-14.0635	-26.3143	-28.4395	-24.3454	-23.6266	-25.4705	-25.1267	1.24057
2.2843	0	520	0	530	0	525	0	535	0	535	0	535	0	535	0	535	0	525	0	535	0	535	0	535	0	0	531.538	1.43051	0.1145	-31.4084	-30.2521	-23.6891	-27.8144	-23.5329	-21.5015	-14.626	-29.502	-28.3457	-24.0954	-22.9703	-25.1267	-25.2387	1.33722
2.2943	0	520	0	530	0	525	0	535	0	535	0	535	0	535	0	535	0	525	0	535	0	535	0	535	0	0	531.538	1.43051	0.115	-31.5959	-30.6896	-23.6891	-27.1581	-24.1267	-21.8765	-13.6572	-26.6893	-29.7521	-23.7829	-23.0953	-26.1893	-25.1918	1.3843
2.3043	0	520	0	530	0	525	0	535	0	535	0	535	0	535	0	535	0	525	0	535	0	535	0	535	0	0	531.538	1.43051	0.1155	-31.1272	-29.7833	-23.6579	-27.0019	-25.1267	-22.8141	-13.5947	-30.2833	-30.8146	-23.6579	-22.9078	-25.6893	-25.5382	1.41958
2.3144	0	520	0	530	0	525	0	535	0	535	0	535	0	535	0	535	0	525	0	535	0	535	0	535	0	0	531.538	1.43051	0.116	-31.6272	-29.6583	-24.783	-27.0331	-24.7205	-20.8764	-14.1885	-27.4394	-29.127	-24.1892	-22.0015	-25.8768	-25.1267	1.33988
2.3244	0	520	0	530	0	525	0	535	0	535	0	535	0	535	0	535	0	525	0	535	0	535	0	535	0	0	531.538	1.43051	0.1165	-31.3772	-30.0646	-24.0642	-26.9081	-24.4704	-23.3454	-14.5948	-28.1895	-28.627	-24.5017	-24.3142	-27.1894	-25.6372	1.24951
2.3344	0	520	0	530	0	525	0	535	0	535	0	535	0	535	0	535	0	525	0	535	0	535	0	535	0	0	531.538	1.43051	0.117	-31.2834	-30.0958	-23.6266	-27.5957	-24.4704	-21.8765	-14.626	-28.0332	-28.6582	-24.2517	-23.0641	-24.1892	-25.1476	1.2881
2.3444	0	520	0	530	0	525	0	535	0	535	0	535	0	535	0	535	0	525	0	535	0	535	0	535	0	0	531.538	1.43051	0.1175	-30.8459	-30.4083	-23.7829	-27.7207	-23.6266	-23.0953	-14.7198	-28.2832	-30.0333	-25.1267	-22.6891	-25.908	-25.52	1.29847
2.3544	0	520	0	530	0	525	0	535	0	535	0	535	0	535	0	535	0	525	0	535	0	535	0	535	0	0	531.538	1.43051	0.118	-31.0959	-30.4708	-23.7204	-28.0644	-24.1892	-21.8453	-13.4072	-28.1895	-29.1895	-24.8767	-23.0953	-27.5644	-25.4757	1.399
2.3645	0	520	0	530	0	525	0	535	0	535	0	535	0	535	0	535	0	525	0	535	0	535	0	535	0	0	531.538	1.43051	0.1185	-31.4084	-30.5334	-23.8767	-29.6583	-24.5954	-21.2827	-13.5322	-28.4707	-28.0957	-25.283	-23.1266	-26.4393	-25.5252	1.41454
2.3745	0	520	0	530	0	525	0	535	0	535	0	535	0	535	0	535	0	525	0	535	0	535	0	535	0	0	531.538	1.43051	0.119	-31.1897	-30.4396	-23.5954	-29.3145	-24.1892	-21.3452	-14.001	-29.3458	-29.3458	-24.0642	-23.2516	-27.1581	-25.6033	1.41816
2.3845	0	520	0	530	0	525	0	535	0	535	0	535	0	535	0	535	0	525	0	535	0	535	0	535	0	0	531.538	1.43051	0.1195	-31.9084	-30.3771	-23.3454	-27.9707	-24.1892	-22.5953	-13.0634	-27.0956	-29.002	-23.0641	-23.5016	-27.0644	-25.2648	1.42208
2.3945	0	520	0	530	0	525	0	535	0	535	0	535	0	535	0	535	0	525	0	535	0	535	0	535	0	0	531.538	1.43051	0.12	-31.6272	-30.3458	-23.9392	-28.1895	-24.3767	-22.5641	-13.7509	-28.5645	-29.0645	-24.4392	-22.4703	-26.4706	-25.4835	1.38158
2.4045	0	520	0	530	0	525	0	535	0	535	0	535	0	535	0	535	0	525	0	535	0	535	0	535	0	0	531.538	1.43051	0.1205	-31.4709	-30.5021	-23.7829	-28.8145	-24.9392	-21.689	-14.3447	-27.3144	-28.877	-23.6266	-22.7828	-25.8455	-25.3325	1.34631
2.4146	0	520	0	530	0	525	0	535	0	535	0	535	0	535	0	535	0	525	0	535	0	535	0	535	0	0	531.538	1.43051	0.121	-31.3772	-30.3771	-24.0954	-27.4394	-24.4392	-22.0328	-13.8134	-28.6582	-29.3458	-26.0018	-22.9078	-26.5956	-25.5903	1.36687
2.4246	0	520	0	530	0	525	0	535	0	535	0	535	0	535	0	535	0	525	0	535	0	535	0	535	0	0	531.538	1.43051	0.1215	-31.4397	-30.8146	-24.3142	-28.2832	-22.7203	-21.5952	-12.9384	-27.9707	-29.1895	-25.033	-23.6579	-26.7831	-25.395	1.45198
2.4346	0	520	0	530	0	525	0	535	0	535	0	535	0	535	0	535	0	525	0	535	0	535	0	535	0	0	531.538	1.43051	0.122	-31.6584	-30.5959	-24.1267	-29.0958	-23.4079	-22.189	-12.5634	-28.5332	-28.877	-23.8141	-22.7516	-27.2519	-25.4054	1.49587
2.4446	0	520	0	530	0	525	0	535	0	535	0	535	0	535	0	535	0	525	0	535	0	535	0	535	0	0	531.538	1.43051	0.1225	-31.3459	-30.1583	-24.1892	-29.1895	-25.408	-23.0328	-11.7821	-27.3456	-28.1269	-24.783	-22.7516	-28.0332	-25.5122	1.48292
2.4546	0	520	0	530	0	525	0	535	0	535	0	535	0	535	0	535	0	525	0	535	0	535	0	535	0	0	531.538	1.43051	0.123	-31.9397	-30.5334	-24.783	-28.2832	-24.9392	-22.6891	-12.1883	-26.8456	-29.4708	-24.7517	-23.7829	-25.283	-25.4575	1.46057
2.4646	0	520	0	530	0	525	0	535	0	535	0	535	0	535	0	535	0	525	0	535	0	535	0	535	0	0	531.538	1.43051	0.1235	-31.7834	-30.5334	-24.3454	-27.5957	-24.2829	-21.0327	-12.5634	-28.5645	-29.4708	-24.1579	-21.814	-27.4394	-25.2986	1.51547
2.4747	0	520	0	530	0	525	0	535	0	535	0	535	0	535	0	535	0	525	0	535	0	535	0	535	0	0	531.538	1.43051	0.124	-32.0022	-30.1583	-24.0642	-27.5331	-23.8141	-21.8765	-11.6258	-28.5332	-28.4082	-23.4391	-22.2515	-25.8455	-24.9627	1.52691
2.4847	0	520	0	530	0	525	0	535	0	535	0	535	0	535	0	535	0	525	0	535	0	535	0	535	0	0	531.538	1.43051	0.1245	-31.8459	-30.2208	-24.5329	-28.2832	-23.9392	-22.0953	-11.9383	-27.5957	-30.0958	-22.9391	-22.7203	-27.3144	-25.2934	1.53683
2.4947	0	520	0	530	0	525	0	535	0	535	0	535	0	535	0	535	0	525	0	535	0	535	0	535	0	0	531.538	1.43051	0.125	-32.0335	-30.9396	-23.5641	-28.0644	-23.3141	-22.3453	-11.4695	-29.0958	-29.0332	-23.2829	-23.1578	-26.5956	-25.2413	1.58209
2.5047	0	520	0	530	0	525	0	535	0	535	0	535	0	535	0	535	0	525	0	535	0	535	0	535	0	0	531.538	1.43051	0.1255	-32.1897	-30.0021	-24.5642	-28.1269	-24.6267	-22.4391	-12.2821	-28.0957	-29.1895	-23.8141	-22.8453	-26.5956	-25.3976	1.47955
2.5147	0	520	0	530	0	525	0	535	0	535	0	535	0	535	0	535	0	525	0	535	0	535	0	535	0	0	531.538	1.43051	0.126	-32.1897	-30.1896	-24.1892	-27.6894	-23.5641	-22.1578	-12.7509	-28.6895	-28.6895	-25.5955	-22.5953	-25.7518	-25.3377	1.4545
2.5248	0	520	0	530	0	525	0	535	0	535	0	535	0	535	0	535	0	525	0	535	0	535	0	535	0	0	531.538	1.43051	0.1265	-32.6898	-30.0333	-24.2829	-28.502	-24.5954	-22.7828	-11.3445	-28.6895	-29.0332	-24.5017	-23.7516	-26.5643	-25.5643	1.55483
2.5348	0	520	0	530	0	525	0	535	0	535	0	535	0	535	0	535	0	525	0	535	0	535	0	535	0	0	531.538	1.43051	0.127	-32.1897	-30.9709	-24.3142	-29.8458	-24.2829	-22.3765	-11.5945	-28.1582	-28.8457	-24.5329	-23.3141	-27.7832	-25.6841	1.57719
2.5448	0	520	0	530	0	525	0	535	0	535	0	535	0	535	0	535	0	525	0	535	0	535	0	535	0	0	531.538	1.43051	0.1275	-32.1585	-30.4083	-23.9079	-29.7208	-23.2829	-22.314	-11.5633	-28.1895	-29.6271	-24.3142	-22.4078	-27.8144	-25.4757	1.60175
2.5548	0	520	0	530	0	525	0	535	0	535	0	535	0	535	0	535	0	525	0	535	0	535	0	535	0	0	531.538	1.43051	0.128	-32.346	-31.0021	-24.1892	-27.1894	-24.0329	-21.689	-10.8758	-27.8769	-29.6271	-24.0954	-23.0641	-26.3456	-25.1944	1.61067
2.5648	0	520	0	530	0	525	0	535	0	535	0	535	0	535	0	535	0	525	0	535	0	535	0	535	0	0	531.538	1.43051	0.1285	-32.596	-30.6584	-25.0642	-28.3145	-22.8453	-21.5015	-11.1258	-28.4082	-28.9707	-26.4081	-22.9391	-27.3456	-25.5148	1.61906
2.5749	0	520	0	530	0	525	0	535	0	535	0	535	0	535	0	535	0	525	0	535	0	535	0	535	0	0	531.538	1.43051	0.129	-31.7522	-30.7521	-23.6579	-27.1269	-23.8454	-21.5952	-10.157	-27.3144	-29.5645	-24.2517	-23.1266	-26.5643	-24.9757	1.63055
2.5849	0	520	0	530	0	525	0	535	0	535	0	535	0	535	0	535	0	525	0	535	0	535	0	535	0	0	531.538	1.43051	0.1295	-31.6272	-30.5646	-24.3142	-28.377	-23.6891	-22.189	-10.1257	-28.2832	-29.1583	-24.7517	-24.1892	-25.8455	-25.2596	1.61976
2.5949	0	520	0	530	0	525	0	535	0	535	0	535	0	535	0	535	0	525	0	535	0	535	0	535	0	0	531.538	1.43051	0.13	-32.1272	-30.6584	-24.3142	-28.377	-23.3766	-22.189	-9.4694	-27.5331	-29.1895	-24.9392	-23.2516	-27.0644	-25.2075	1.69044
2.6049	0	520	0	530	0	525	0	535	0	535	0	535	0	535	0	535	0	525	0	535	0	535	0	535	0	0	531.538	1.43051	0.1305	-32.346	-30.6584	-24.2829	-29.1895	-24.1892	-21.814	-9.62566	-28.9707	-29.5333	-24.8455	-24.1267	-27.2519	-25.5695	1.7178
2.6149	0	520	0	530	0	525	0	535	0	535	0	535	0	535	0	535	0	525	0	535	0	535	0	535	0	0	531.538	1.43051	0.131	-31.7209	-30.8146	-24.3142	-27.6582	-24.8455	-22.1578	-10.0945	-28.1269	-30.3771	-24.9392	-23.9392	-26.8144	-25.4835	1.64478
2.6249	0	520	0	530	0	525	0	535	0	535	0	535	0	535	0	535	0	525	0	535	0	535	0	535	0	0	531.538	1.43051	0.1315	-31.7522	-30.8459	-24.1892	-28.1269	-22.8141	-22.3765	-9.90693	-28.1582	-29.5333	-24.5954	-21.8453	-27.1269	-25.1059	1.68481
2.635	0	520	0	530	0	525	0	535	0	535	0	535	0	535	0	535	0	525	0	535	0	535	0	535	0	0	531.538	1.43051	0.132	-31.5959	-30.3146	-23.8767	-28.377	-23.9079	-22.064	-12.0946	-27.7832	-28.6582	-25.033	-23.5016	-26.9706	-25.3481	1.47346
2.645	0	520	0	530	0	525	0	535	0	535	0	535	0	535	0	535	0	525	0	535	0	535	0	535	0	0	531.538	1.43051	0.1325	-31.4709	-30.4083	-23.5954	-30.0021	-23.4391	-21.4077	-9.4069	-28.1895	-29.3458	-25.3455	-23.6266	-24.8455	-25.0903	1.71356
2.655	0	520	0	530	0	525	0	535	0	535	0	535	0	535	0	535	0	525	0	535	0	535	0	535	0	0	531.538	1.43051	0.133	-32.096	-30.8459	-24.1892	-28.8457	-22.8453	-22.9078	-8.87561	-28.0957	-29.6583	-24.783	-23.4391	-27.6582	-25.3533	1.7588
2.665	0	520	0	530	0	525	0	535	0	535	0	535	0	535	0	535	0	525	0	535	0	535	0	535	0	0	531.538	1.43051	0.1335	-32.596	-30.5021	-23.7516	-28.1895	-23.8767	-22.4391	-9.12563	-27.6582	-29.0332	-24.4392	-22.5328	-27.2519	-25.1163	1.72803
2.675	0	520	0	530	0	525	0	535	0	535	0	535	0	535	0	535	0	525	0	535	0	535	0	535	0	0	531.538	1.43051	0.134	-30.9709	-30.7521	-24.0329	-28.877	-23.4079	-22.6266	-7.34426	-27.8144	-28.8145	-25.4705	-23.6266	-27.3456	-25.0903	1.81446
2.6851	0	520	0	530	0	525	0	535	0	535	0	535	0	535	0	535	0	525	0	535	0	535	0	535	0	0	531.538	1.43051	0.1345	-31.7209	-30.8459	-23.5954	-28.3457	-23.7516	-22.0953	-8.84436	-27.7207	-29.6896	-24.8767	-22.9391	-27.9082	-25.1944	1.752
2.6951	0	520	0	530	0	525	0	535	0	535	0	535	0	535	0	535	0	525	0	535	0	535	0	535	0	0	531.538	1.43051	0.135	-31.9084	-30.8146	-24.1892	-27.7519	-22.9703	-23.0016	-7.68803	-28.3145	-29.9396	-22.6266	-23.3141	-27.3769	-24.9913	1.8404
2.7051	0	520	0	530	0	525	0	535	0	535	0	535	0	535	0	535	0	525	0	535	0	535	0	535	0	0	531.538	1.43051	0.1355	-31.3459	-31.1897	-24.6267	-28.7207	-22.6266	-22.0953	-6.34419	-27.6269	-28.752	-25.9393	-23.6579	-27.6894	-25.0512	1.9179
2.7151	0	520	0	530	0	525	0	535	0	535	0	535	0	535	0	535	0	525	0	535	0	535	0	535	0	0	531.538	1.43051	0.136	-32.1272	-31.0334	-23.8767	-29.0958	-23.3141	-23.4079	-9.03187	-28.2832	-29.377	-22.8141	-23.5329	-27.8457	-25.3116	1.7611
2.7251	0	520	0	530	0	525	0	535	0	535	0	535	0	535	0	535	0	525	0	535	0	535	0	535	0	0	531.538	1.43051	0.1365	-31.9084	-31.0959	-23.5641	-29.1895	-23.8767	-21.9078	-7.50052	-27.0956	-29.1895	-24.4704	-23.2516	-27.5957	-25.0538	1.85362
2.7352	0	520	0	530	0	525	0	535	0	535	0	535	0	535	0	535	0	525	0	535	0	535	0	535	0	0	531.538	1.43051	0.137	-31.9397	-31.0646	-23.3454	-29.127	-23.5641	-20.5639	-6.03167	-27.5957	-27.9082	-25.033	-22.5641	-27.6894	-24.7022	1.97244
2.7452	0	520	0	530	0	525	0	535	0	535	0	535	0	535	0	535	0	525	0	535	0	535	0	535	0	0	531.538	1.43051	0.1375	-31.3772	-30.9709	-23.7204	-28.9707	-24.8455	-23.6891	-4.53156	-28.3457	-29.2208	-24.5954	-23.4079	-27.9082	-25.1319	2.04935
2.7552	0	520	0	530	0	525	0	535	0	535	0	535	0	535	0	535	0	525	0	535	0	535	0	535	0	0	531.538	1.43051	0.138	-32.2835	-31.0021	-24.0954	-29.7208	-23.6579	-20.8139	-4.68782	-26.8144	-29.8458	-23.9392	-23.4704	-28.877	-24.934	2.11292
2.7652	0	520	0	530	0	525	0	535	0	535	0	535	0	535	0	535	0	525	0	535	0	535	0	535	0	0	531.538	1.43051	0.1385	-32.1897	-31.5022	-23.5954	-29.8458	-22.4391	-24.1892	-3.87527	-29.1583	-29.8771	-25.033	-23.9392	-27.0331	-25.2231	2.16486
2.7752	0	520	0	530	0	525	0	535	0	535	0	535	0	535	0	535	0	525	0	535	0	535	0	535	0	0	531.538	1.43051	0.139	-32.1272	-31.1897	-23.6891	-29.8458	-22.9703	-19.8764	-3.18772	-25.908	-29.9708	-25.5018	-24.5954	-26.8456	-24.6423	2.21612
2.7853	0	520	0	530	0	525	0	535	0	535	0	535	0	535	0	535	0	525	0	535	0	535	0	535	0	0	531.538	1.43051	0.1395	-31.9084	-31.1897	-23.5641	-29.502	-22.7203	-22.3453	-4.03153	-29.2833	-29.5333	-24.9392	-24.1892	-26.5643	-24.9809	2.13607
2.7953	0	520	0	530	0	525	0	535	0	535	0	535	0	535	0	535	0	525	0	535	0	535	0	535	0	0	531.538	1.43051	0.14	-31.8147	-30.7521	-23.7204	-29.1583	-22.0328	-21.189	-2.03139	-28.3145	-29.5645	-23.4391	-24.1892	-27.7519	-24.4965	2.28431
2.8053	0	520	0	530	0	525	0	535	0	535	0	535	0	535	0	535	0	525	0	535	0	535	0	535	0	0	531.538	1.43051	0.1405	-31.2522	-31.0334	-23.3766	-29.127	-22.9703	-22.5953	-1.18758	-27.5957	-30.8459	-24.6892	-24.1267	-27.5644	-24.697	2.33442
2.8153	0	520	0	530	0	525	0	535	0	535	0	535	0	535	0	535	0	525	0	535	0	535	0	535	0	0	531.538	1.43051	0.141	-31.971	-30.9396	-23.5016	-29.0332	-23.3766	-23.1891	-1.40635	-28.9082	-30.0958	-23.6266	-23.5954	-27.7832	-24.7856	2.33104
2.8253	0	520	0	530	0	525	0	535	0	535	0	535	0	535	0	535	0	525	0	535	0	535	0	535	0	0	531.538	1.43051	0.1415	-32.2835	-31.0959	-24.1892	-30.1271	-22.5328	-20.9077	1.03132	-26.7831	-29.9708	-23.8141	-24.2517	-27.1269	-24.3376	2.53271
2.8353	0	520	0	530	0	525	0	535	0	535	0	535	0	535	0	535	0	525	0	535	0	535	0	535	0	0	531.538	1.43051	0.142	-32.5022	-31.6897	-23.9079	-29.377	-22.8453	-23.4079	1.87513	-28.4082	-30.0646	-25.0017	-23.6266	-26.4393	-24.6163	2.59705
2.8454	0	520	0	530	0	525	0	535	0	535	0	535	0	535	0	535	0	525	0	535	0	535	0	535	0	0	531.538	1.43051	0.1425	-32.1897	-30.6896	-23.2829	-28.502	-22.6578	-22.2828	2.90645	-25.8143	-28.3457	-24.0017	-22.4078	-28.1582	-23.7855	2.61517
2.8554	0	520	0	530	0	525	0	535	0	535	0	535	0	535	0	535	0	525	0	535	0	535	0	535	0	0	531.538	1.43051	0.143	-32.4397	-30.7834	-24.4079	-28.4395	-23.0641	-24.1892	2.81269	-29.5645	-30.8146	-25.1267	-23.1266	-27.3144	-24.7048	2.67056
2.8654	0	520	0	530	0	525	0	535	0	535	0	535	0	535	0	535	0	525	0	535	0	535	0	535	0	0	531.538	1.43051	0.1435	-32.9398	-30.7521	-23.8454	-28.8457	-22.6891	-22.314	6.06292	-27.1894	-30.3771	-24.1267	-23.4079	-26.8144	-23.9365	2.90824
2.8754	0	520	0	530	0	525	0	535	0	535	0	535	0	535	0	535	0	525	0	535	0	535	0	535	0	0	531.538	1.43051	0.144	-32.1897	-30.9709	-24.1892	-28.9707	-23.3454	-22.1265	6.75047	-29.8146	-28.752	-25.658	-24.6267	-26.7831	-24.223	2.96011
2.8854	0	520	0	530	0	525	0	535	0	535	0	535	0	535	0	535	0	525	0	535	0	535	0	535	0	0	531.538	1.43051	0.1445	-32.6898	-30.5959	-23.8767	-29.6583	-22.7516	-23.8141	8.18807	-27.1894	-28.9395	-25.9705	-22.2828	-27.6894	-23.9392	3.0695
2.8955	0	520	0	530	0	525	0	535	0	535	0	535	0	535	0	535	0	525	0	535	0	535	0	535	0	0	531.538	1.43051	0.145	-32.8773	-30.0646	-23.9392	-29.2833	-24.3767	-22.1578	11.3758	-29.5645	-29.6583	-26.4706	-23.4391	-26.6581	-23.9261	3.34266
2.9055	0	520	0	530	0	525	0	535	0	535	0	535	0	535	0	535	0	525	0	535	0	535	0	535	0	0	531.538	1.43051	0.1455	-32.4085	-30.7521	-23.4391	-29.9396	-22.189	-21.689	12.1258	-28.6895	-29.5958	-25.658	-23.9392	-26.2831	-23.5381	3.39819
2.9155	0	520	0	530	0	525	0	535	0	535	0	535	0	535	0	535	0	525	0	535	0	535	0	535	0	0	531.538	1.43051	0.146	-32.471	-30.3146	-24.5017	-30.2833	-22.5641	-22.189	12.9071	-28.0957	-30.7521	-25.5643	-23.0016	-28.1895	-23.7516	3.48314
2.9255	0	520	0	530	0	525	0	535	0	535	0	535	0	535	0	535	0	525	0	535	0	535	0	535	0	0	531.538	1.43051	0.1465	-33.1898	-30.3771	-23.9079	-29.3145	-22.6578	-22.9703	15.251	-28.627	-30.4083	-25.1267	-23.6891	-25.5643	-23.3818	3.65001
2.9355	0	520	0	530	0	525	0	535	0	535	0	535	0	535	0	535	0	525	0	535	0	535	0	535	0	0	531.538	1.43051	0.147	-32.6898	-30.5334	-23.6266	-28.7207	-21.0639	-22.6266	14.8135	-28.377	-29.4708	-24.8767	-23.5329	-26.1893	-23.0745	3.59103
2.9456	0	520	0	530	0	525	0	535	0	535	0	535	0	535	0	535	0	525	0	535	0	535	0	535	0	0	531.538	1.43051	0.1475	-32.4397	-29.7521	-23.0953	-29.9083	-23.0328	-22.2828	17.72	-28.877	-29.4395	-24.7517	-23.3766	-25.5955	-22.9026	3.8207
2.9556	0	520	0	530	0	525	0	535	0	535	0	535	0	535	0	535	0	525	0	535	0	535	0	535	0	0	531.538	1.43051	0.148	-32.6898	-29.9396	-23.6579	-30.0646	-23.0016	-22.064	19.0951	-28.8457	-29.7833	-24.2204	-23.9704	-27.6894	-23.0693	3.95985
2.9656	0	520	0	530	0	525	0	535	0	535	0	535	0	535	0	535	0	525	0	535	0	535	0	535	0	0	531.538	1.43051	0.1485	-32.846	-30.0021	-22.6578	-29.7521	-21.9078	-22.2828	20.9702	-27.9082	-29.2833	-25.7518	-23.7204	-26.5643	-22.6422	4.09138
2.9756	0	520	0	530	0	525	0	535	0	535	0	535	0	535	0	535	0	525	0	535	0	535	0	535	0	0	531.538	1.43051	0.149	-32.8148	-29.8146	-23.4079	-27.9082	-23.2203	-21.9078	21.2515	-28.1269	-29.2833	-24.6892	-23.6579	-26.9706	-22.5458	4.09064
2.9856	0	520	0	530	0	525	0	535	0	535	0	535	0	535	0	535	0	525	0	535	0	535	0	535	0	0	531.538	1.43051	0.1495	-32.6272	-30.1896	-23.3454	-28.3145	-22.7828	-22.6266	20.7514	-29.1895	-29.8771	-25.9705	-22.0015	-24.2829	-22.538	4.06539
2.9956	0	520	0	530	0	525	0	535	0	535	0	535	0	535	0	535	0	525	0	535	0	535	0	535	0	0	531.538	1.43051	0.15	-33.221	-30.3458	-23.5329	-28.8457	-21.689	-22.9703	21.4077	-28.502	-29.6271	-24.3454	-25.283	-26.1893	-22.762	4.13536
3.0057	0	520	0	530	0	525	0	535	0	535	0	535	0	535	0	535	0	525	0	535	0	535	0	535	0	0	531.538	1.43051	0.1505	-32.7523	-29.7521	-23.5016	-28.3457	-21.9703	-23.0328	21.939	-27.8769	-29.7521	-25.5955	-23.4704	-25.3143	-22.4521	4.14527
3.0157	0	520	0	530	0	525	0	535	0	535	0	535	0	535	0	535	0	525	0	535	0	535	0	535	0	0	531.538	1.43051	0.151	-33.096	-30.0958	-23.7204	-28.4082	-22.3765	-22.7516	20.0639	-28.377	-30.7834	-25.158	-23.3766	-25.9393	-22.8349	4.02605
3.0257	0	520	0	530	0	525	0	535	0	535	0	535	0	535	0	535	0	525	0	535	0	535	0	535	0	0	531.538	1.43051	0.1515	-32.2835	-29.6271	-23.0641	-28.4082	-23.2829	-22.9703	19.8139	-27.8769	-29.4708	-25.6893	-24.3142	-26.8144	-22.8323	3.97081
3.0357	0	520	0	530	0	525	0	535	0	535	0	535	0	535	0	535	0	525	0	535	0	535	0	535	0	0	531.538	1.43051	0.152	-33.1585	-29.8146	-23.1266	-29.9083	-22.4703	-22.2828	19.2826	-28.0644	-30.6896	-25.9705	-23.6891	-26.2518	-23.012	3.97972
3.0457	0	520	0	530	0	525	0	535	0	535	0	535	0	535	0	535	0	525	0	535	0	535	0	535	0	0	531.538	1.43051	0.1525	-33.1585	-29.502	-23.5016	-29.4083	-22.3765	-23.0328	17.6262	-28.8145	-30.5334	-25.7518	-23.3141	-26.9706	-23.2282	3.84456
3.0558	0	520	0	530	0	525	0	535	0	535	0	535	0	535	0	535	0	525	0	535	0	535	0	535	0	0	531.538	1.43051	0.153	-33.096	-29.2833	-23.1266	-30.3771	-22.4391	-22.3453	17.9387	-28.1895	-30.1896	-24.7205	-23.6891	-27.6269	-23.0953	3.869
3.0658	0	520	0	530	0	525	0	535	0	535	0	535	0	535	0	535	0	525	0	535	0	535	0	535	0	0	531.538	1.43051	0.1535	-33.2523	-29.1895	-23.5016	-30.0021	-22.189	-22.6891	17.3762	-28.252	-28.4395	-25.4705	-24.0642	-25.783	-22.9547	3.78976
3.0758	0	520	0	530	0	525	0	535	0	535	0	535	0	535	0	535	0	525	0	535	0	535	0	535	0	0	531.538	1.43051	0.154	-32.9085	-29.4395	-23.8141	-30.3146	-21.0639	-22.189	17.5012	-28.1582	-29.8458	-26.5018	-23.3766	-27.9082	-23.1683	3.84175
3.0858	0	520	0	530	0	525	0	535	0	535	0	535	0	535	0	535	0	525	0	535	0	535	0	535	0	0	531.538	1.43051	0.1545	-33.1898	-29.5645	-23.5641	-29.0332	-22.4703	-21.8765	15.5323	-28.377	-29.9708	-26.033	-23.2829	-25.9393	-23.1474	3.65676
3.0958	0	520	0	530	0	525	0	535	0	535	0	535	0	535	0	535	0	525	0	535	0	535	0	535	0	0	531.538	1.43051	0.155	-33.0648	-29.6896	-23.3141	-28.7832	-22.7516	-22.2828	14.5322	-26.8769	-29.127	-25.0642	-24.4704	-26.0643	-23.0797	3.54318
3.1059	0	520	0	530	0	525	0	535	0	535	0	535	0	535	0	535	0	525	0	535	0	535	0	535	0	0	531.538	1.43051	0.1555	-33.0023	-29.4083	-23.9079	-29.2833	-22.314	-23.1266	13.6259	-27.4706	-28.8145	-24.1892	-22.6266	-26.6581	-23.0979	3.47281
3.1159	0	520	0	530	0	525	0	535	0	535	0	535	0	535	0	535	0	525	0	535	0	535	0	535	0	0	531.538	1.43051	0.156	-32.5335	-28.9395	-23.5954	-28.9395	-23.0641	-22.4703	11.282	-28.4082	-29.8458	-23.5329	-23.4079	-25.8455	-23.275	3.28114
3.1259	0	520	0	530	0	525	0	535	0	535	0	535	0	535	0	535	0	525	0	535	0	535	0	535	0	0	531.538	1.43051	0.1565	-32.4397	-28.6582	-23.8454	-29.4083	-22.0953	-23.3454	12.0008	-28.1269	-30.1896	-24.9392	-23.1891	-26.4706	-23.3922	3.34944
3.1359	0	520	0	530	0	525	0	535	0	535	0	535	0	535	0	535	0	525	0	535	0	535	0	535	0	0	531.538	1.43051	0.157	-32.4397	-29.3458	-23.5016	-28.4082	-21.5952	-21.9703	10.7195	-27.3769	-30.0958	-25.783	-23.5641	-27.0019	-23.3636	3.24611
3.1459	0	520	0	530	0	525	0	535	0	535	0	535	0	535	0	535	0	525	0	535	0	535	0	535	0	0	531.538	1.43051	0.1575	-32.5335	-29.2833	-23.6579	-28.4082	-22.189	-22.314	10.6257	-28.1895	-29.9083	-25.6268	-23.5954	-25.6268	-23.3922	3.23198
3.156	0	520	0	530	0	525	0	535	0	535	0	535	0	535	0	535	0	525	0	535	0	535	0	535	0	0	531.538	1.43051	0.158	-32.0647	-29.4395	-23.8767	-28.6895	-21.8765	-21.9078	9.4069	-28.9707	-29.8771	-26.8456	-22.8766	-27.9082	-23.7438	3.16783
3.166	0	520	0	530	0	525	0	535	0	535	0	535	0	535	0	535	0	525	0	535	0	535	0	535	0	0	531.538	1.43051	0.1585	-31.9084	-29.5958	-24.1579	-29.0332	-22.9078	-23.1578	7.53177	-28.4395	-29.6583	-25.783	-24.2829	-26.7519	-24.0121	2.98725
3.176	0	520	0	530	0	525	0	535	0	535	0	535	0	535	0	535	0	525	0	535	0	535	0	535	0	0	531.538	1.43051	0.159	-32.6272	-29.6583	-23.7516	-30.9084	-22.4391	-21.8453	5.87541	-29.252	-30.0646	-26.6893	-22.7516	-26.5956	-24.2256	2.9299
3.186	0	520	0	530	0	525	0	535	0	535	0	535	0	535	0	535	0	525	0	535	0	535	0	535	0	0	531.538	1.43051	0.1595	-32.4397	-29.5645	-23.8767	-30.9709	-21.9703	-23.0016	4.15654	-28.5645	-29.6583	-25.408	-23.6266	-25.283	-24.184	2.75917
3.196	0	520	0	530	0	525	0	535	0	535	0	535	0	535	0	535	0	525	0	535	0	535	0	535	0	0	531.538	1.43051	0.16	-32.3147	-29.1583	-23.7829	-29.9396	-22.1265	-22.064	1.5001	-28.1895	-29.502	-25.3455	-24.5017	-25.5018	-24.2439	2.52264
3.206	0	520	0	530	0	525	0	535	0	535	0	535	0	535	0	535	0	525	0	535	0	535	0	535	0	0	531.538	1.43051	0.1605	-32.1585	-29.6271	-23.0953	-29.5645	-21.7828	-23.1266	1.81263	-28.3457	-28.5957	-25.0017	-23.7516	-24.783	-24.0017	2.52812
3.2161	0	520	0	530	0	525	0	535	0	535	0	535	0	535	0	535	0	525	0	535	0	535	0	535	0	0	531.538	1.43051	0.161	-32.1272	-29.8146	-23.4704	-30.5959	-21.814	-22.0015	0.37503	-28.877	-29.0645	-25.6268	-23.4391	-26.9706	-24.4522	2.47001
3.2261	0	520	0	530	0	525	0	535	0	535	0	535	0	535	0	535	0	525	0	535	0	535	0	535	0	0	531.538	1.43051	0.1615	-32.0647	-30.1896	-24.0329	-30.4396	-21.1577	-22.8766	-0.09376	-28.502	-29.9083	-25.6268	-23.3454	-26.9706	-24.6007	2.44394
3.2361	0	520	0	530	0	525	0	535	0	535	0	535	0	535	0	535	0	525	0	535	0	535	0	535	0	0	531.538	1.43051	0.162	-32.7835	-30.1271	-24.1579	-30.1896	-23.0016	-22.6891	-3.93777	-29.7521	-30.4396	-25.033	-24.0954	-25.9705	-25.1814	2.169
3.2461	0	520	0	530	0	525	0	535	0	535	0	535	0	535	0	535	0	525	0	535	0	535	0	535	0	0	531.538	1.43051	0.1625	-32.2835	-29.9708	-24.1267	-29.9083	-21.7515	-22.4391	-4.12528	-27.9394	-29.5333	-25.1892	-23.2203	-26.3143	-24.7335	2.11192
3.2561	0	520	0	530	0	525	0	535	0	535	0	535	0	535	0	535	0	525	0	535	0	535	0	535	0	0	531.538	1.43051	0.163	-32.6272	-29.7208	-24.4704	-29.6583	-22.189	-23.0328	-6.59421	-28.0332	-29.5958	-25.283	-22.9391	-26.9081	-25.0877	1.92901
3.2662	0	520	0	530	0	525	0	535	0	535	0	535	0	535	0	535	0	525	0	535	0	535	0	535	0	0	531.538	1.43051	0.1635	-32.6898	-29.6271	-23.9079	-29.9083	-22.3453	-21.0639	-9.81318	-29.4083	-29.1895	-23.9704	-23.5641	-26.8456	-25.1944	1.74526
3.2762	0	520	0	530	0	525	0	535	0	535	0	535	0	535	0	535	0	525	0	535	0	535	0	535	0	0	531.538	1.43051	0.164	-32.5335	-29.6271	-24.1892	-29.8146	-21.7828	-22.4703	-9.50066	-27.0019	-28.0019	-24.4392	-22.9391	-25.6893	-24.8324	1.68931
3.2862	0	520	0	530	0	525	0	535	0	535	0	535	0	535	0	535	0	525	0	535	0	535	0	535	0	0	531.538	1.43051	0.1645	-32.9398	-29.7521	-24.0642	-31.1272	-21.314	-22.0015	-11.5633	-29.252	-29.7208	-24.4392	-25.1892	-27.0331	-25.6997	1.66546
3.2962	0	520	0	530	0	525	0	535	0	535	0	535	0	535	0	535	0	525	0	535	0	535	0	535	0	0	531.538	1.43051	0.165	-32.471	-28.4707	-24.0642	-30.7521	-21.2515	-21.939	-13.6259	-27.1269	-31.1584	-23.6579	-23.6579	-25.408	-25.2986	1.50696
3.3062	0	520	0	530	0	525	0	535	0	535	0	535	0	535	0	535	0	525	0	535	0	535	0	535	0	0	531.538	1.43051	0.1655	-32.0022	-29.9396	-23.1891	-29.6271	-19.9076	-23.4079	-13.3134	-30.1896	-29.7833	-25.0642	-24.0017	-25.283	-25.4757	1.53578
3.3163	0	520	0	530	0	525	0	535	0	535	0	535	0	535	0	535	0	525	0	535	0	535	0	535	0	0	531.538	1.43051	0.166	-33.221	-29.8146	-24.6267	-30.9084	-21.6265	-21.0639	-15.0635	-26.1893	-29.9083	-26.4081	-22.8766	-26.9394	-25.7205	1.4589
3.3263	0	520	0	530	0	525	0	535	0	535	0	535	0	535	0	535	0	525	0	535	0	535	0	535	0	0	531.538	1.43051	0.1665	-32.1585	-29.7833	-24.1267	-31.0334	-21.6578	-23.1891	-16.0636	-29.5333	-30.1896	-24.5954	-24.0329	-26.2518	-26.0513	1.35536
3.3363	0	520	0	530	0	525	0	535	0	535	0	535	0	535	0	535	0	525	0	535	0	535	0	535	0	0	531.538	1.43051	0.167	-32.1897	-29.6583	-23.8767	-30.2208	-21.0639	-22.5016	-17.6262	-26.033	-29.9396	-26.5643	-24.0017	-26.1893	-25.8221	1.23163
3.3463	0	520	0	530	0	525	0	535	0	535	0	535	0	535	0	535	0	525	0	535	0	535	0	535	0	0	531.538	1.43051	0.1675	-32.8148	-29.5645	-23.9392	-31.3772	-21.1577	-22.064	-16.9387	-29.9708	-30.0333	-25.908	-23.3141	-26.0643	-26.0956	1.38309
3.3563	0	520	0	530	0	525	0	535	0	535	0	535	0	535	0	535	0	525	0	535	0	535	0	535	0	0	531.538	1.43051	0.168	-33.0023	-30.0958	-24.1579	-31.4397	-21.6265	-24.4704	-18.1575	-28.0019	-29.8146	-25.1267	-24.2517	-25.8768	-26.3352	1.23953
3.3663	0	520	0	530	0	525	0	535	0	535	0	535	0	535	0	535	0	525	0	535	0	535	0	535	0	0	531.538	1.43051	0.1685	-33.0648	-30.0021	-24.3142	-30.0958	-21.939	-21.939	-19.5951	-28.502	-29.5645	-25.1892	-23.5016	-25.3455	-26.0877	1.18626
3.3764	0	520	0	530	0	525	0	535	0	535	0	535	0	535	0	535	0	525	0	535	0	535	0	535	0	0	531.538	1.43051	0.169	-32.6272	-29.8771	-25.0642	-30.1896	-20.5014	-24.0642	-19.6889	-27.8769	-30.0333	-24.783	-23.3454	-25.4393	-26.1242	1.16658
3.3864	0	520	0	530	0	525	0	535	0	535	0	535	0	535	0	535	0	525	0	535	0	535	0	535	0	0	531.538	1.43051	0.1695	-33.3773	-29.7521	-23.8767	-29.2833	-21.3765	-22.1265	-20.1264	-27.4394	-30.1896	-25.283	-22.3453	-28.1895	-26.1138	1.20857
3.3964	0	520	0	530	0	525	0	535	0	535	0	535	0	535	0	535	0	525	0	535	0	535	0	535	0	0	531.538	1.43051	0.17	-32.846	-29.8146	-24.1892	-29.5645	-21.0639	-23.0016	-20.9077	-28.0332	-29.7521	-25.3768	-23.5016	-27.2831	-26.2779	1.10869
3.4064	0	520	0	530	0	525	0	535	0	535	0	535	0	535	0	535	0	525	0	535	0	535	0	535	0	0	531.538	1.43051	0.1705	-32.721	-29.7208	-24.3454	-30.5959	-21.2515	-22.5641	-21.0327	-28.8145	-29.9708	-24.8142	-23.6891	-26.7519	-26.356	1.13946
3.4164	0	520	0	530	0	525	0	535	0	535	0	535	0	535	0	535	0	525	0	535	0	535	0	535	0	0	531.538	1.43051	0.171	-32.7523	-30.0646	-24.1267	-30.7209	-20.8139	-21.9078	-22.3765	-27.9082	-30.6584	-26.0643	-23.7829	-26.8456	-26.5018	1.14361
3.4265	0	520	0	530	0	525	0	535	0	535	0	535	0	535	0	535	0	525	0	535	0	535	0	535	0	0	531.538	1.43051	0.1715	-32.471	-30.1896	-23.9079	-28.5645	-21.0952	-23.8454	-22.8141	-27.7519	-29.8458	-25.6893	-24.9705	-26.8456	-26.4992	0.97689
3.4365	0	520	0	530	0	525	0	535	0	535	0	535	0	535	0	535	0	525	0	535	0	535	0	535	0	0	531.538	1.43051	0.172	-32.6585	-30.1583	-23.8767	-29.0332	-21.7515	-22.189	-22.7203	-28.5645	-30.4708	-25.158	-23.2829	-25.9705	-26.3195	1.07344
3.4465	0	520	0	530	0	525	0	535	0	535	0	535	0	535	0	535	0	525	0	535	0	535	0	535	0	0	531.538	1.43051	0.1725	-33.3773	-30.4396	-24.0017	-28.8145	-21.1577	-22.8453	-22.6266	-28.5332	-29.502	-26.0643	-23.4079	-27.3144	-26.507	1.08319
3.4565	0	520	0	530	0	525	0	535	0	535	0	535	0	535	0	535	0	525	0	535	0	535	0	535	0	0	531.538	1.43051	0.173	-33.2835	-30.1896	-23.9079	-31.1272	-21.189	-22.5016	-21.5327	-28.3457	-30.9709	-24.3454	-23.2829	-28.7207	-26.6164	1.23025
3.4665	0	520	0	530	0	525	0	535	0	535	0	535	0	535	0	535	0	525	0	535	0	535	0	535	0	0	531.538	1.43051	0.1735	-32.3772	-29.9708	-23.9704	-29.4708	-20.4077	-22.5953	-22.5016	-28.1269	-30.3771	-25.2517	-24.0329	-27.0956	-26.3482	1.0856
3.4766	0	520	0	530	0	525	0	535	0	535	0	535	0	535	0	535	0	525	0	535	0	535	0	535	0	0	531.538	1.43051	0.174	-31.7209	-30.6896	-23.6891	-29.252	-20.2827	-22.4703	-23.1891	-27.0644	-30.0333	-24.6892	-23.6579	-26.3143	-26.0877	1.05993
3.4866	0	520	0	530	0	525	0	535	0	535	0	535	0	535	0	535	0	525	0	535	0	535	0	535	0	0	531.538	1.43051	0.1745	-33.3148	-30.5021	-23.0641	-29.6271	-20.7514	-22.5328	-21.9078	-28.0332	-30.8146	-25.158	-23.1891	-27.9394	-26.4029	1.1985
3.4966	0	520	0	530	0	525	0	535	0	535	0	535	0	535	0	535	0	525	0	535	0	535	0	535	0	0	531.538	1.43051	0.175	-32.9398	-30.3458	-24.0017	-29.3145	-20.3139	-23.1891	-22.064	-28.1895	-31.3459	-24.6892	-23.1266	-26.7519	-26.356	1.16821
3.5066	0	520	0	530	0	525	0	535	0	535	0	535	0	535	0	535	0	525	0	535	0	535	0	535	0	0	531.538	1.43051	0.1755	-32.596	-30.4396	-23.8454	-30.6271	-20.5952	-21.9703	-23.0328	-28.3457	-31.0334	-25.658	-24.8455	-26.8456	-26.6529	1.13955
3.5166	0	520	0	530	0	525	0	535	0	535	0	535	0	535	0	535	0	525	0	535	0	535	0	535	0	0	531.538	1.43051	0.176	-33.221	-30.0333	-23.6891	-30.1896	-19.6263	-22.314	-23.1266	-27.8457	-31.7209	-25.8143	-23.4704	-25.8143	-26.4055	1.21356
3.5266	0	520	0	530	0	525	0	535	0	535	0	535	0	535	0	535	0	525	0	535	0	535	0	535	0	0	531.538	1.43051	0.1765	-32.5647	-30.3771	-24.1892	-29.6583	-21.189	-22.7203	-23.1891	-28.1895	-30.0646	-25.908	-23.8767	-27.7519	-26.6399	1.04703
3.5367	0	520	0	530	0	525	0	535	0	535	0	535	0	535	0	535	0	525	0	535	0	535	0	535	0	0	531.538	1.43051	0.177	-32.0647	-30.0958	-23.6891	-29.4708	-20.7514	-22.6891	-22.064	-29.002	-30.3146	-25.1892	-23.0328	-26.8456	-26.2674	1.10745
3.5467	0	520	0	530	0	525	0	535	0	535	0	535	0	535	0	535	0	525	0	535	0	535	0	535	0	0	531.538	1.43051	0.1775	-32.4397	-30.3771	-24.0954	-29.9708	-19.3138	-23.1891	-23.4391	-28.0957	-29.9083	-25.908	-23.7829	-28.1895	-26.5591	1.11743
3.5567	0	520	0	530	0	525	0	535	0	535	0	535	0	535	0	535	0	525	0	535	0	535	0	535	0	0	531.538	1.43051	0.178	-32.596	-30.5646	-24.8767	-28.627	-19.4388	-22.7203	-23.7829	-28.0332	-29.9396	-25.533	-23.8767	-27.4394	-26.4523	1.08441
3.5667	0	520	0	530	0	525	0	535	0	535	0	535	0	535	0	535	0	525	0	535	0	535	0	535	0	0	531.538	1.43051	0.1785	-32.9398	-30.5334	-23.6891	-30.8146	-19.9701	-22.0953	-24.5642	-29.2208	-30.0646	-26.3143	-23.5641	-27.1894	-26.7466	1.16304
3.5767	0	520	0	530	0	525	0	535	0	535	0	535	0	535	0	535	0	525	0	535	0	535	0	535	0	0	531.538	1.43051	0.179	-32.8773	-30.4396	-23.8141	-31.5022	-20.7514	-22.8141	-23.8767	-28.627	-30.2833	-25.0642	-23.7204	-28.377	-26.8456	1.14367
3.5868	0	520	0	530	0	525	0	535	0	535	0	535	0	535	0	535	0	525	0	535	0	535	0	535	0	0	531.538	1.43051	0.1795	-33.3773	-30.8459	-24.5954	-30.8459	-19.8451	-22.8453	-23.6579	-28.5645	-30.7521	-24.5642	-24.0017	-26.4081	-26.6919	1.18806
3.5968	0	520	0	530	0	525	0	535	0	535	0	535	0	535	0	535	0	525	0	535	0	535	0	535	0	0	531.538	1.43051	0.18	-32.5022	-31.0334	-23.5641	-31.3147	-20.7514	-22.2828	-23.3766	-27.7519	-30.0021	-26.0018	-24.5642	-27.7207	-26.7388	1.1268
3.6068	0	520	0	530	0	525	0	535	0	535	0	535	0	535	0	535	0	525	0	535	0	535	0	535	0	0	531.538	1.43051	0.1805	-33.346	-30.6271	-23.8767	-31.0334	-20.0951	-22.4391	-23.5954	-28.877	-30.4083	-23.9079	-23.3141	-26.9706	-26.5409	1.21631
3.6168	0	520	0	530	0	525	0	535	0	535	0	535	0	535	0	535	0	525	0	535	0	535	0	535	0	0	531.538	1.43051	0.181	-32.846	-30.7834	-23.5954	-30.5646	-19.4701	-23.0953	-23.5954	-27.9394	-29.7833	-23.9704	-23.0016	-26.8456	-26.2909	1.181
3.6268	0	520	0	530	0	525	0	535	0	535	0	535	0	535	0	535	0	525	0	535	0	535	0	535	0	0	531.538	1.43051	0.1815	-33.1898	-30.8146	-23.6579	-31.4084	-19.0326	-23.0953	-23.8141	-28.4082	-29.9083	-24.5954	-24.0329	-28.1269	-26.6737	1.22278
3.6369	0	520	0	530	0	525	0	535	0	535	0	535	0	535	0	535	0	525	0	535	0	535	0	535	0	0	531.538	1.43051	0.182	-33.2523	-30.9709	-23.7516	-31.6897	-19.9389	-22.5641	-23.9392	-27.4081	-30.9396	-24.5017	-24.1579	-27.0644	-26.6815	1.21575
3.6469	0	520	0	530	0	525	0	535	0	535	0	535	0	535	0	535	0	525	0	535	0	535	0	535	0	0	531.538	1.43051	0.1825	-32.9398	-30.3146	-24.0017	-30.7521	-19.9076	-23.1266	-23.8141	-27.4706	-30.1896	-24.908	-25.4393	-26.8769	-26.6451	1.10269
3.6569	0	520	0	530	0	525	0	535	0	535	0	535	0	535	0	535	0	525	0	535	0	535	0	535	0	0	531.538	1.43051	0.183	-33.1898	-30.0646	-23.7516	-31.0334	-19.4701	-22.5953	-23.3454	-27.7832	-29.4083	-24.1892	-23.9079	-27.0644	-26.3169	1.17506
3.6669	0	520	0	530	0	525	0	535	0	535	0	535	0	535	0	535	0	525	0	535	0	535	0	535	0	0	531.538	1.43051	0.1835	-33.9711	-30.4708	-23.4391	-30.4083	-19.5638	-22.3765	-22.0953	-28.9707	-30.5959	-24.4079	-24.1892	-27.0644	-26.4628	1.27221
3.6769	0	520	0	530	0	525	0	535	0	535	0	535	0	535	0	535	0	525	0	535	0	535	0	535	0	0	531.538	1.43051	0.184	-33.4086	-30.6271	-23.6891	-30.2521	-19.0951	-24.1267	-23.2829	-27.5644	-29.7521	-24.8767	-24.2829	-27.7519	-26.5591	1.16235
3.687	0	520	0	530	0	525	0	535	0	535	0	535	0	535	0	535	0	525	0	535	0	535	0	535	0	0	531.538	1.43051	0.1845	-33.1585	-30.5646	-23.5641	-30.1583	-20.0014	-23.1266	-24.0642	-28.7832	-29.3145	-24.0017	-24.1267	-28.752	-26.6347	1.14239
3.697	0	520	0	530	0	525	0	535	0	535	0	535	0	535	0	535	0	525	0	535	0	535	0	535	0	0	531.538	1.43051	0.185	-33.8148	-30.4396	-23.1578	-30.6584	-19.1576	-23.0328	-23.3454	-28.1895	-29.5958	-24.0017	-23.5329	-28.0644	-26.4159	1.24078
3.707	0	520	0	530	0	525	0	535	0	535	0	535	0	535	0	535	0	525	0	535	0	535	0	535	0	0	531.538	1.43051	0.1855	-33.4711	-31.1897	-23.9704	-29.8146	-18.72	-22.6578	-23.5954	-28.0019	-30.4396	-25.3768	-23.3141	-27.9394	-26.5409	1.23993
3.717	0	520	0	530	0	525	0	535	0	535	0	535	0	535	0	535	0	525	0	535	0	535	0	535	0	0	531.538	1.43051	0.186	-32.7523	-31.0334	-23.6891	-29.9708	-19.0951	-22.189	-24.4079	-29.5333	-30.5334	-24.8455	-24.9392	-28.1895	-26.7649	1.19987
3.727	0	520	0	530	0	525	0	535	0	535	0	535	0	535	0	535	0	525	0	535	0	535	0	535	0	0	531.538	1.43051	0.1865	-33.096	-31.2522	-24.1579	-29.5333	-18.595	-23.1578	-23.0953	-27.6582	-29.5645	-23.9704	-23.4704	-27.9707	-26.2935	1.21227
3.737	0	520	0	530	0	525	0	535	0	535	0	535	0	535	0	535	0	525	0	535	0	535	0	535	0	0	531.538	1.43051	0.187	-32.9398	-30.5334	-23.5954	-31.1272	-18.5013	-22.9703	-23.0641	-29.4395	-30.0646	-24.1892	-24.1579	-26.9706	-26.4628	1.25592
3.7471	0	520	0	530	0	525	0	535	0	535	0	535	0	535	0	535	0	525	0	535	0	535	0	535	0	0	531.538	1.43051	0.1875	-32.9398	-30.8146	-23.5016	-31.0646	-20.3139	-22.8766	-22.314	-27.3144	-29.3145	-24.4392	-23.8454	-27.2831	-26.3352	1.16449
3.7571	0	520	0	530	0	525	0	535	0	535	0	535	0	535	0	535	0	525	0	535	0	535	0	535	0	0	531.538	1.43051	0.188	-33.3148	-30.0958	-23.5016	-30.1583	-19.1576	-23.3766	-22.8453	-28.9395	-29.502	-24.5017	-23.0953	-28.5332	-26.4185	1.21034
3.7671	0	520	0	530	0	525	0	535	0	535	0	535	0	535	0	535	0	525	0	535	0	535	0	535	0	0	531.538	1.43051	0.1885	-33.1273	-30.9084	-24.7205	-30.1896	-18.6888	-21.5952	-22.5016	-28.7207	-29.9396	-25.033	-24.1579	-27.7832	-26.4471	1.2529
3.7771	0	520	0	530	0	525	0	535	0	535	0	535	0	535	0	535	0	525	0	535	0	535	0	535	0	0	531.538	1.43051	0.189	-33.1898	-30.6584	-23.6579	-30.1896	-17.7825	-23.6266	-22.2828	-29.7833	-29.6583	-24.0954	-23.8767	-28.5332	-26.4445	1.30061
3.7871	0	520	0	530	0	525	0	535	0	535	0	535	0	535	0	535	0	525	0	535	0	535	0	535	0	0	531.538	1.43051	0.1895	-33.0648	-30.3458	-23.8141	-29.252	-17.345	-22.7203	-22.6266	-28.877	-30.0646	-23.3454	-25.408	-27.6582	-26.2101	1.27806
3.7972	0	520	0	530	0	525	0	535	0	535	0	535	0	535	0	535	0	525	0	535	0	535	0	535	0	0	531.538	1.43051	0.19	-33.3773	-30.8771	-23.7829	-29.8146	-18.4388	-23.1266	-22.189	-28.6895	-29.502	-24.6579	-23.9392	-28.627	-26.4185	1.25522
3.8072	0	520	0	530	0	525	0	535	0	535	0	535	0	535	0	535	0	525	0	535	0	535	0	535	0	0	531.538	1.43051	0.1905	-33.0335	-30.8146	-24.1267	-29.6583	-18.3763	-22.9391	-22.189	-27.9394	-29.9708	-23.4391	-23.0016	-27.7519	-26.1034	1.26004
3.8172	0	520	0	530	0	525	0	535	0	535	0	535	0	535	0	535	0	525	0	535	0	535	0	535	0	0	531.538	1.43051	0.191	-33.1585	-31.0646	-23.3766	-30.8459	-18.6575	-22.5641	-21.9078	-27.1269	-30.7209	-24.1892	-23.9079	-26.6581	-26.1815	1.29385
3.8272	0	520	0	530	0	525	0	535	0	535	0	535	0	535	0	535	0	525	0	535	0	535	0	535	0	0	531.538	1.43051	0.1915	-32.6585	-30.4396	-23.8767	-28.0957	-18.5638	-22.8766	-23.5954	-30.0958	-29.5958	-25.1892	-21.6578	-29.0332	-26.3065	1.23421
3.8372	0	520	0	530	0	525	0	535	0	535	0	535	0	535	0	535	0	525	0	535	0	535	0	535	0	0	531.538	1.43051	0.192	-32.721	-30.6584	-23.3766	-29.3458	-17.8137	-21.939	-21.6265	-27.2831	-30.6271	-24.0017	-23.6266	-27.9707	-25.9159	1.30287
3.8473	0	520	0	530	0	525	0	535	0	535	0	535	0	535	0	535	0	525	0	535	0	535	0	535	0	0	531.538	1.43051	0.1925	-32.9398	-30.1896	-23.1891	-31.7834	-16.8449	-23.8767	-20.7202	-30.0958	-29.0958	-24.7205	-24.1267	-28.4082	-26.3325	1.40141
3.8573	0	520	0	530	0	525	0	535	0	535	0	535	0	535	0	535	0	525	0	535	0	535	0	535	0	0	531.538	1.43051	0.193	-32.971	-31.0334	-23.1266	-29.5958	-17.4075	-22.5328	-20.8452	-28.5332	-31.2834	-24.1892	-23.5329	-29.2833	-26.1945	1.40768
3.8673	0	520	0	530	0	525	0	535	0	535	0	535	0	535	0	535	0	525	0	535	0	535	0	535	0	0	531.538	1.43051	0.1935	-32.7523	-30.6271	-23.2829	-30.7209	-17.595	-22.9391	-19.9076	-29.6896	-30.0021	-25.0955	-24.9705	-28.9082	-26.3742	1.38194
3.8773	0	520	0	530	0	525	0	535	0	535	0	535	0	535	0	535	0	525	0	535	0	535	0	535	0	0	531.538	1.43051	0.194	-32.1272	-30.6584	-23.3454	-31.0021	-17.5325	-23.1578	-21.1577	-27.9082	-29.4395	-26.2831	-24.5642	-28.9707	-26.3456	1.28965
3.8873	0	520	0	530	0	525	0	535	0	535	0	535	0	535	0	535	0	525	0	535	0	535	0	535	0	0	531.538	1.43051	0.1945	-31.8772	-30.6584	-23.6266	-30.9709	-18.4075	-21.814	-21.0014	-29.5333	-29.5645	-24.3454	-23.8767	-27.8144	-26.1242	1.29767
3.8973	0	520	0	530	0	525	0	535	0	535	0	535	0	535	0	535	0	525	0	535	0	535	0	535	0	0	531.538	1.43051	0.195	-32.096	-30.7834	-23.2829	-30.5646	-17.5012	-24.1892	-20.5327	-28.5957	-29.9708	-25.1892	-23.1266	-28.7832	-26.218	1.32647
3.9074	0	520	0	530	0	525	0	535	0	535	0	535	0	535	0	535	0	525	0	535	0	535	0	535	0	0	531.538	1.43051	0.1955	-32.2522	-30.6584	-23.2516	-30.0958	-17.0012	-21.0327	-20.5014	-28.5645	-31.1584	-25.2517	-22.9391	-28.3145	-25.9185	1.4286
3.9174	0	520	0	530	0	525	0	535	0	535	0	535	0	535	0	535	0	525	0	535	0	535	0	535	0	0	531.538	1.43051	0.196	-32.3772	-31.0021	-23.6579	-31.5647	-16.1261	-23.5954	-20.4077	-28.877	-29.9708	-24.1892	-23.8141	-29.0332	-26.218	1.44972
3.9274	0	520	0	530	0	525	0	535	0	535	0	535	0	535	0	535	0	525	0	535	0	535	0	535	0	0	531.538	1.43051	0.1965	-31.971	-30.5334	-23.9704	-29.5958	-17.3137	-21.814	-20.0951	-29.6271	-30.1896	-23.9704	-24.4079	-28.0332	-25.9601	1.3556
3.9374	0	520	0	530	0	525	0	535	0	535	0	535	0	535	0	535	0	525	0	535	0	535	0	535	0	0	531.538	1.43051	0.197	-32.4397	-31.1897	-23.5329	-29.1583	-17.4075	-22.4078	-21.1265	-29.7208	-29.9396	-24.4392	-25.533	-29.5958	-26.3742	1.34339
3.9474	0	520	0	530	0	525	0	535	0	535	0	535	0	535	0	535	0	525	0	535	0	535	0	535	0	0	531.538	1.43051	0.1975	-32.2835	-30.7521	-23.9392	-30.0333	-17.5325	-23.4079	-20.0951	-29.1895	-29.5645	-24.6579	-23.8767	-29.4395	-26.231	1.33781
3.9575	0	520	0	530	0	525	0	535	0	535	0	535	0	535	0	535	0	525	0	535	0	535	0	535	0	0	531.538	1.43051	0.198	-33.1585	-30.6896	-23.8454	-29.4395	-17.5012	-22.9078	-19.5638	-28.0332	-29.9396	-24.8767	-24.1892	-29.0958	-26.1034	1.36675
3.9675	0	520	0	530	0	525	0	535	0	535	0	535	0	535	0	535	0	525	0	535	0	535	0	535	0	0	531.538	1.43051	0.1985	-32.3772	-30.9084	-23.6579	-32.1272	-18.1575	-23.5016	-19.8451	-27.9394	-29.5333	-24.2829	-23.4391	-29.3145	-26.257	1.37445
3.9775	0	520	0	530	0	525	0	535	0	535	0	535	0	535	0	535	0	525	0	535	0	535	0	535	0	0	531.538	1.43051	0.199	-32.5647	-30.9396	-24.0642	-31.4709	-17.1887	-21.689	-18.345	-29.2833	-29.8771	-23.1891	-23.5016	-28.8457	-25.9132	1.51747
3.9875	0	520	0	530	0	525	0	535	0	535	0	535	0	535	0	535	0	525	0	535	0	535	0	535	0	0	531.538	1.43051	0.1995	-32.2522	-30.7521	-23.5641	-31.8459	-18.1262	-22.3765	-19.5951	-28.3457	-30.3771	-23.8454	-24.5329	-27.8769	-26.1242	1.38368
3.9975	0	520	0	530	0	525	0	535	0	535	0	535	0	535	0	535	0	525	0	535	0	535	0	535	0	0	531.538	1.43051	0.2	-32.3772	-31.0959	-23.4704	-30.6584	-17.3137	-23.5954	-19.3763	-29.4083	-29.8458	-23.1266	-24.3142	-30.0021	-26.2154	1.43761
4.0076	0	520	0	530	0	525	0	535	0	535	0	535	0	535	0	535	0	525	0	535	0	535	0	535	0	0	531.538	1.43051	0.2005	-32.2835	-30.9084	-23.5954	-31.8772	-16.6261	-22.4703	-21.2515	-28.7832	-30.5646	-23.6579	-23.8454	-27.6269	-26.1242	1.42474
4.0176	0	520	0	530	0	525	0	535	0	535	0	535	0	535	0	535	0	525	0	535	0	535	0	535	0	0	531.538	1.43051	0.201	-32.4397	-30.6584	-23.5954	-31.7522	-16.8449	-22.189	-18.1575	-29.127	-30.7209	-25.7518	-22.5016	-29.6896	-26.119	1.55625
4.0276	0	520	0	530	0	525	0	535	0	535	0	535	0	535	0	535	0	525	0	535	0	535	0	535	0	0	531.538	1.43051	0.2015	-32.471	-30.9396	-23.5016	-31.1897	-16.3136	-22.9078	-19.1576	-28.3145	-30.0646	-24.4704	-24.5017	-29.5333	-26.1138	1.47824
4.0376	0	520	0	530	0	525	0	535	0	535	0	535	0	535	0	535	0	525	0	535	0	535	0	535	0	0	531.538	1.43051	0.202	-32.4397	-31.0959	-23.5954	-31.7522	-15.7511	-22.9078	-18.9388	-29.8146	-30.5021	-23.2203	-24.0017	-30.3458	-26.1971	1.59481
4.0476	0	520	0	530	0	525	0	535	0	535	0	535	0	535	0	535	0	525	0	535	0	535	0	535	0	0	531.538	1.43051	0.2025	-32.346	-30.9396	-23.0328	-31.3459	-16.9074	-24.0017	-16.8137	-27.9707	-30.8146	-24.783	-25.4705	-28.877	-26.1086	1.53266
4.0577	0	520	0	530	0	525	0	535	0	535	0	535	0	535	0	535	0	525	0	535	0	535	0	535	0	0	531.538	1.43051	0.203	-31.9397	-30.5646	-23.4079	-31.5334	-17.0637	-23.0953	-17.5325	-28.0332	-30.5959	-23.9079	-24.0642	-28.3457	-25.8403	1.48738
4.0677	0	520	0	530	0	525	0	535	0	535	0	535	0	535	0	535	0	525	0	535	0	535	0	535	0	0	531.538	1.43051	0.2035	-31.8772	-30.8771	-23.4704	-30.0958	-16.5636	-22.9391	-17.1887	-28.7207	-29.2208	-24.0642	-23.3766	-29.252	-25.6372	1.49483
4.0777	0	520	0	530	0	525	0	535	0	535	0	535	0	535	0	535	0	525	0	535	0	535	0	535	0	0	531.538	1.43051	0.204	-31.6272	-31.5022	-23.2829	-30.3146	-16.7512	-23.3454	-17.7512	-28.9395	-29.8458	-23.7516	-24.5329	-30.6896	-26.0278	1.51054
4.0877	0	520	0	530	0	525	0	535	0	535	0	535	0	535	0	535	0	525	0	535	0	535	0	535	0	0	531.538	1.43051	0.2045	-31.9397	-31.4397	-23.2829	-30.1896	-16.6261	-22.5641	-18.6575	-29.3145	-30.5334	-23.8767	-23.6891	-29.7521	-25.9888	1.50468
4.0977	0	520	0	530	0	525	0	535	0	535	0	535	0	535	0	535	0	525	0	535	0	535	0	535	0	0	531.538	1.43051	0.205	-31.8147	-31.1897	-23.3454	-30.8771	-16.0011	-22.7828	-18.1575	-28.9707	-31.0646	-23.9079	-23.8141	-29.0958	-25.9185	1.54857
4.1077	0	520	0	530	0	525	0	535	0	535	0	535	0	535	0	535	0	525	0	535	0	535	0	535	0	0	531.538	1.43051	0.2055	-31.6584	-31.0021	-23.1266	-30.7834	-16.1574	-22.5328	-18.095	-28.7832	-29.9396	-23.8767	-24.1892	-31.7209	-25.9888	1.56512
4.1178	0	520	0	530	0	525	0	535	0	535	0	535	0	535	0	535	0	525	0	535	0	535	0	535	0	0	531.538	1.43051	0.206	-32.2835	-32.0647	-23.5016	-30.6896	-15.9073	-23.5329	-18.7513	-28.627	-30.1271	-24.0954	-25.2517	-29.0958	-26.1607	1.51354
4.1278	0	520	0	530	0	525	0	535	0	535	0	535	0	535	0	535	0	525	0	535	0	535	0	535	0	0	531.538	1.43051	0.2065	-31.4397	-31.1584	-23.8767	-31.6897	-16.5011	-22.5016	-17.3762	-29.2833	-30.1583	-23.5329	-21.8765	-28.3145	-25.6424	1.56888
4.1378	0	520	0	530	0	525	0	535	0	535	0	535	0	535	0	535	0	525	0	535	0	535	0	535	0	0	531.538	1.43051	0.207	-31.8772	-31.3772	-23.6579	-32.8773	-16.7512	-22.1578	-17.8762	-28.9082	-29.5958	-22.8141	-24.0642	-29.7208	-25.9731	1.58511
4.1478	0	520	0	530	0	525	0	535	0	535	0	535	0	535	0	535	0	525	0	535	0	535	0	535	0	0	531.538	1.43051	0.2075	-31.9397	-31.4084	-24.0329	-32.1272	-15.4698	-21.9078	-17.1887	-30.2833	-30.6896	-24.3454	-24.0642	-30.0333	-26.1242	1.68352
4.1578	0	520	0	530	0	525	0	535	0	535	0	535	0	535	0	535	0	525	0	535	0	535	0	535	0	0	531.538	1.43051	0.208	-31.9397	-31.4709	-23.9704	-30.9084	-15.9386	-22.064	-16.7512	-28.877	-29.8458	-24.1267	-24.1892	-29.9708	-25.8377	1.60726
4.1679	0	520	0	530	0	525	0	535	0	535	0	535	0	535	0	535	0	525	0	535	0	535	0	535	0	0	531.538	1.43051	0.2085	-32.346	-31.5022	-23.4079	-30.3771	-16.7199	-23.2829	-16.1261	-28.8145	-30.0646	-25.4705	-23.9079	-28.9707	-25.9159	1.56974
4.1779	0	520	0	530	0	525	0	535	0	535	0	535	0	535	0	535	0	525	0	535	0	535	0	535	0	0	531.538	1.43051	0.209	-32.0022	-30.9084	-23.5954	-29.502	-17.3137	-23.0953	-17.3762	-28.0957	-30.1583	-23.6891	-23.5954	-29.6896	-25.7518	1.4619
4.1879	0	520	0	530	0	525	0	535	0	535	0	535	0	535	0	535	0	525	0	535	0	535	0	535	0	0	531.538	1.43051	0.2095	-31.4709	-31.3459	-23.5329	-29.7208	-17.3762	-22.9391	-17.1574	-27.5644	-30.5646	-24.783	-23.8454	-30.6271	-25.9106	1.48501
4.1979	0	520	0	530	0	525	0	535	0	535	0	535	0	535	0	535	0	525	0	535	0	535	0	535	0	0	531.538	1.43051	0.21	-32.0647	-31.3147	-24.1892	-29.8771	-15.8448	-21.9078	-16.7824	-29.2833	-30.0958	-23.8454	-24.6267	-29.0958	-25.744	1.58367
4.2079	0	520	0	530	0	525	0	535	0	535	0	535	0	535	0	535	0	525	0	535	0	535	0	535	0	0	531.538	1.43051	0.2105	-31.8772	-31.3147	-23.7829	-29.6896	-15.1885	-23.3766	-16.6886	-28.5645	-31.6272	-24.8142	-24.1892	-30.6271	-25.9784	1.64252
4.218	0	520	0	530	0	525	0	535	0	535	0	535	0	535	0	535	0	525	0	535	0	535	0	535	0	0	531.538	1.43051	0.211	-31.4709	-31.1272	-23.4391	-29.3145	-15.2823	-22.8453	-16.8449	-28.7832	-29.4395	-23.6266	-23.8141	-31.6897	-25.6398	1.61246
4.228	0	520	0	530	0	525	0	535	0	535	0	535	0	535	0	535	0	525	0	535	0	535	0	535	0	0	531.538	1.43051	0.2115	-31.6272	-31.7209	-24.0017	-26.9706	-15.4698	-23.0016	-17.0949	-29.5958	-32.1897	-23.0328	-23.4079	-30.3771	-25.7075	1.63624
4.238	0	520	0	530	0	525	0	535	0	535	0	535	0	535	0	535	0	525	0	535	0	535	0	535	0	0	531.538	1.43051	0.212	-31.1897	-31.0021	-23.3454	-29.377	-16.0324	-22.314	-15.5011	-30.2521	-30.8146	-23.7516	-24.8142	-31.6272	-25.8351	1.68017
4.248	0	520	0	530	0	525	0	535	0	535	0	535	0	535	0	535	0	525	0	535	0	535	0	535	0	0	531.538	1.43051	0.2125	-31.1897	-31.4709	-23.5016	-29.0958	-16.4699	-22.5641	-15.5948	-27.5957	-29.0645	-24.0329	-24.0329	-31.3147	-25.4939	1.57738
4.258	0	520	0	530	0	525	0	535	0	535	0	535	0	535	0	535	0	525	0	535	0	535	0	535	0	0	531.538	1.43051	0.213	-31.1272	-31.3772	-23.8454	-29.9708	-15.4386	-22.6266	-15.5948	-30.4396	-29.8146	-25.3455	-23.5641	-30.5021	-25.8039	1.66795
4.268	0	520	0	530	0	525	0	535	0	535	0	535	0	535	0	535	0	525	0	535	0	535	0	535	0	0	531.538	1.43051	0.2135	-32.096	-31.3772	-22.7516	-29.9396	-15.5948	-22.6578	-15.3448	-28.1895	-30.1896	-23.9704	-24.1892	-31.3147	-25.6346	1.70006
4.2781	0	520	0	530	0	525	0	535	0	535	0	535	0	535	0	535	0	525	0	535	0	535	0	535	0	0	531.538	1.43051	0.214	-31.971	-31.1897	-23.5016	-30.6271	-15.9386	-23.4704	-14.7823	-29.1583	-28.627	-25.5018	-25.7518	-31.5959	-26.0096	1.6792
4.2881	0	520	0	530	0	525	0	535	0	535	0	535	0	535	0	535	0	525	0	535	0	535	0	535	0	0	531.538	1.43051	0.2145	-31.7209	-30.8146	-23.4079	-31.1897	-14.376	-22.9078	-14.9385	-27.0019	-31.0959	-24.7517	-23.9704	-30.0958	-25.5226	1.74791
4.2981	0	520	0	530	0	525	0	535	0	535	0	535	0	535	0	535	0	525	0	535	0	535	0	535	0	0	531.538	1.43051	0.215	-31.8772	-31.3459	-22.7828	-29.8458	-15.5948	-22.5641	-15.4698	-30.1271	-29.377	-25.3143	-24.4079	-30.7521	-25.7882	1.68033
4.3081	0	520	0	530	0	525	0	535	0	535	0	535	0	535	0	535	0	525	0	535	0	535	0	535	0	0	531.538	1.43051	0.2155	-32.0647	-31.3459	-23.4079	-29.8146	-14.7823	-22.3765	-14.501	-28.0332	-30.1583	-23.6579	-22.2515	-31.9084	-25.3585	1.80227
4.3181	0	520	0	530	0	525	0	535	0	535	0	535	0	535	0	535	0	525	0	535	0	535	0	535	0	0	531.538	1.43051	0.216	-31.1897	-31.7209	-23.3141	-29.3458	-16.2824	-22.8453	-16.6261	-28.252	-30.2833	-23.4704	-24.1892	-30.8771	-25.6997	1.57183
4.3282	0	520	0	530	0	525	0	535	0	535	0	535	0	535	0	535	0	525	0	535	0	535	0	535	0	0	531.538	1.43051	0.2165	-32.471	-31.1897	-23.6891	-28.627	-15.5948	-22.2515	-13.9697	-29.3458	-30.0646	-23.9079	-23.5641	-30.9396	-25.4679	1.7562
4.3382	0	520	0	530	0	525	0	535	0	535	0	535	0	535	0	535	0	525	0	535	0	535	0	535	0	0	531.538	1.43051	0.217	-32.346	-32.0022	-23.4391	-29.2833	-15.5948	-23.0328	-15.0323	-26.6268	-29.9708	-24.6579	-23.8141	-30.9084	-25.5591	1.68662
4.3482	0	520	0	530	0	525	0	535	0	535	0	535	0	535	0	535	0	525	0	535	0	535	0	535	0	0	531.538	1.43051	0.2175	-31.971	-31.1584	-23.4391	-29.002	-15.251	-23.9392	-15.0635	-28.1895	-31.4709	-24.1267	-25.3143	-28.1895	-25.5929	1.64854
4.3582	0	520	0	530	0	525	0	535	0	535	0	535	0	535	0	535	0	525	0	535	0	535	0	535	0	0	531.538	1.43051	0.218	-32.0022	-31.3459	-23.2829	-29.0958	-14.6885	-22.0015	-15.3448	-28.752	-29.9708	-25.1267	-23.8454	-30.6271	-25.507	1.71067
4.3682	0	520	0	530	0	525	0	535	0	535	0	535	0	535	0	535	0	525	0	535	0	535	0	535	0	0	531.538	1.43051	0.2185	-31.6272	-31.4709	-23.7204	-30.1583	-14.4697	-23.1891	-14.1885	-28.9707	-30.4708	-25.658	-24.3142	-30.0958	-25.6945	1.76642
4.3783	0	520	0	530	0	525	0	535	0	535	0	535	0	535	0	535	0	525	0	535	0	535	0	535	0	0	531.538	1.43051	0.219	-31.8147	-31.3459	-23.6266	-29.8771	-14.6885	-23.6891	-14.0635	-27.3144	-30.1896	-24.9392	-23.7516	-30.4396	-25.4783	1.74236
4.3883	0	520	0	530	0	525	0	535	0	535	0	535	0	535	0	535	0	525	0	535	0	535	0	535	0	0	531.538	1.43051	0.2195	-31.4397	-31.1272	-23.4391	-30.5021	-14.3135	-23.5641	-11.9696	-29.502	-30.5334	-24.4079	-22.8141	-30.9396	-25.3794	1.92146
4.3983	0	520	0	530	0	525	0	535	0	535	0	535	0	535	0	535	0	525	0	535	0	535	0	535	0	0	531.538	1.43051	0.22	-31.9084	-31.0959	-23.1266	-30.8771	-13.6572	-23.3766	-15.3761	-27.8144	-29.7833	-23.9704	-24.2829	-30.2521	-25.4601	1.75005
4.4083	0	520	0	530	0	525	0	535	0	535	0	535	0	535	0	535	0	525	0	535	0	535	0	535	0	0	531.538	1.43051	0.2205	-32.1585	-31.5022	-23.5641	-29.3458	-14.376	-21.564	-13.8447	-28.4082	-30.3146	-25.4705	-23.9079	-28.9707	-25.2856	1.78302
4.4183	0	520	0	530	0	525	0	535	0	535	0	535	0	535	0	535	0	525	0	535	0	535	0	535	0	0	531.538	1.43051	0.221	-32.3147	-30.4708	-23.7829	-29.6583	-14.4697	-23.8454	-14.4697	-28.4082	-30.0021	-24.7205	-23.0953	-29.7521	-25.4158	1.72014
4.4284	0	520	0	530	0	525	0	535	0	535	0	535	0	535	0	535	0	525	0	535	0	535	0	535	0	0	531.538	1.43051	0.2215	-31.9397	-31.0959	-22.9703	-31.2834	-13.3134	-21.314	-12.2508	-27.8144	-31.0334	-24.783	-24.783	-31.5647	-25.3455	1.99944
4.4384	0	520	0	530	0	525	0	535	0	535	0	535	0	535	0	535	0	525	0	535	0	535	0	535	0	0	531.538	1.43051	0.222	-31.9397	-30.5646	-23.1266	-30.6584	-14.0322	-22.6891	-12.2821	-27.7832	-30.8459	-23.8454	-23.8141	-29.6896	-25.1059	1.88404
4.4484	0	520	0	530	0	525	0	535	0	535	0	535	0	535	0	535	0	525	0	535	0	535	0	535	0	0	531.538	1.43051	0.2225	-31.9397	-30.8771	-22.9391	-30.9709	-14.626	-23.1266	-12.8134	-27.4394	-30.3146	-25.533	-23.8141	-31.3459	-25.4783	1.85793
4.4584	0	520	0	530	0	525	0	535	0	535	0	535	0	535	0	535	0	525	0	535	0	535	0	535	0	0	531.538	1.43051	0.223	-31.5959	-30.9396	-23.9079	-30.9709	-13.9385	-22.7516	-12.6259	-27.2519	-30.6896	-24.0642	-23.8454	-29.4395	-25.1684	1.85697
4.4684	0	520	0	530	0	525	0	535	0	535	0	535	0	535	0	535	0	525	0	535	0	535	0	535	0	0	531.538	1.43051	0.2235	-31.9084	-31.3147	-24.0329	-30.5334	-14.4072	-25.0017	-11.1883	-26.6893	-30.5646	-23.5329	-23.8141	-30.6271	-25.3012	1.92684
4.4784	0	520	0	530	0	525	0	535	0	535	0	535	0	535	0	535	0	525	0	535	0	535	0	535	0	0	531.538	1.43051	0.224	-32.0335	-31.4084	-22.6891	-30.3458	-14.501	-21.5952	-11.5945	-27.9082	-29.7833	-24.5329	-24.0017	-31.8147	-25.184	1.95512
4.4885	0	520	0	530	0	525	0	535	0	535	0	535	0	535	0	535	0	525	0	535	0	535	0	535	0	0	531.538	1.43051	0.2245	-31.6272	-30.7521	-23.2516	-29.4395	-13.7822	-22.6266	-11.6883	-27.7207	-30.3146	-24.1892	-24.4079	-31.5022	-25.1085	1.92125
4.4985	0	520	0	530	0	525	0	535	0	535	0	535	0	535	0	535	0	525	0	535	0	535	0	535	0	0	531.538	1.43051	0.225	-30.9084	-31.0334	-23.1891	-30.6584	-14.5635	-21.9703	-11.9696	-27.6894	-30.7209	-24.2517	-24.9392	-29.9708	-25.1554	1.86564
4.5085	0	520	0	530	0	525	0	535	0	535	0	535	0	535	0	535	0	525	0	535	0	535	0	535	0	0	531.538	1.43051	0.2255	-32.4085	-31.1897	-23.1891	-28.5957	-14.4697	-22.4078	-11.0008	-27.6894	-29.7833	-24.7517	-23.7829	-30.9084	-25.0147	1.92581
4.5185	0	520	0	530	0	525	0	535	0	535	0	535	0	535	0	535	0	525	0	535	0	535	0	535	0	0	531.538	1.43051	0.226	-31.1897	-31.1897	-22.8766	-29.9083	-14.5322	-23.0016	-12.4696	-27.1894	-30.0333	-24.6579	-23.8141	-30.3146	-25.0981	1.81655
4.5285	0	520	0	530	0	525	0	535	0	535	0	535	0	535	0	535	0	525	0	535	0	535	0	535	0	0	531.538	1.43051	0.2265	-31.0646	-30.5334	-23.1891	-30.7521	-14.6885	-22.7828	-11.7196	-27.6894	-30.3771	-24.3454	-23.8141	-30.7834	-25.145	1.87195
4.5386	0	520	0	530	0	525	0	535	0	535	0	535	0	535	0	535	0	525	0	535	0	535	0	535	0	0	531.538	1.43051	0.227	-31.0021	-31.4084	-23.6579	-31.0334	-13.7509	-22.8453	-12.7821	-28.1269	-31.0959	-24.3142	-25.033	-32.0647	-25.5929	1.92444
4.5486	0	520	0	530	0	525	0	535	0	535	0	535	0	535	0	535	0	525	0	535	0	535	0	535	0	0	531.538	1.43051	0.2275	-31.9397	-30.6896	-23.2829	-30.9084	-15.1573	-23.1578	-11.5945	-27.5331	-30.1271	-24.5329	-23.7516	-30.0646	-25.2283	1.86245
4.5586	0	520	0	530	0	525	0	535	0	535	0	535	0	535	0	535	0	525	0	535	0	535	0	535	0	0	531.538	1.43051	0.228	-31.0334	-31.1272	-23.3766	-31.2834	-13.9385	-21.189	-11.0008	-27.5957	-30.8771	-24.3142	-24.4079	-31.3459	-25.1241	2.00587
4.5686	0	520	0	530	0	525	0	535	0	535	0	535	0	535	0	535	0	525	0	535	0	535	0	535	0	0	531.538	1.43051	0.2285	-31.0021	-30.9396	-22.6578	-30.5334	-13.7822	-21.189	-10.1882	-28.0957	-30.4083	-24.8455	-24.0017	-30.0021	-24.8038	2.00676
4.5786	0	520	0	530	0	525	0	535	0	535	0	535	0	535	0	535	0	525	0	535	0	535	0	535	0	0	531.538	1.43051	0.229	-31.1897	-31.4084	-23.8141	-30.0646	-14.4697	-22.9078	-9.03187	-28.5957	-30.1271	-24.6579	-22.3765	-31.2209	-24.9887	2.06264
4.5887	0	520	0	530	0	525	0	535	0	535	0	535	0	535	0	535	0	525	0	535	0	535	0	535	0	0	531.538	1.43051	0.2295	-31.0959	-31.1272	-23.6579	-29.5333	-13.9697	-22.189	-11.657	-28.4082	-30.2833	-24.3767	-23.8767	-33.0648	-25.27	1.96562
4.5987	0	520	0	530	0	525	0	535	0	535	0	535	0	535	0	535	0	525	0	535	0	535	0	535	0	0	531.538	1.43051	0.23	-31.0959	-31.2834	-23.4704	-30.0646	-13.3447	-21.689	-9.59441	-28.8457	-30.5021	-23.5016	-23.2829	-30.5021	-24.7647	2.07554
4.6087	0	520	0	530	0	525	0	535	0	535	0	535	0	535	0	535	0	525	0	535	0	535	0	535	0	0	531.538	1.43051	0.2305	-30.6896	-31.3772	-22.8766	-29.6896	-15.6886	-22.4391	-8.87561	-28.1895	-29.5333	-24.3142	-25.408	-31.1897	-25.0226	1.98949
4.6187	0	520	0	530	0	525	0	535	0	535	0	535	0	535	0	535	0	525	0	535	0	535	0	535	0	0	531.538	1.43051	0.231	-31.0021	-30.9709	-23.3454	-29.4083	-14.6885	-23.0016	-8.87561	-29.4083	-29.502	-25.1892	-23.6266	-30.8459	-24.9887	2.02253
4.6287	0	520	0	530	0	525	0	535	0	535	0	535	0	535	0	535	0	525	0	535	0	535	0	535	0	0	531.538	1.43051	0.2315	-31.0021	-31.0334	-22.9703	-29.0958	-14.251	-22.8141	-8.81311	-28.5957	-30.3771	-24.8767	-23.0328	-31.0021	-24.822	2.05425
4.6387	0	520	0	530	0	525	0	535	0	535	0	535	0	535	0	535	0	525	0	535	0	535	0	535	0	0	531.538	1.43051	0.232	-31.1897	-30.7209	-23.0328	-28.0644	-13.876	-21.7203	-8.18807	-26.4706	-30.3458	-24.0642	-23.7829	-32.4397	-24.4913	2.1084
4.6488	0	520	0	530	0	525	0	535	0	535	0	535	0	535	0	535	0	525	0	535	0	535	0	535	0	0	531.538	1.43051	0.2325	-31.0334	-31.3147	-23.3141	-29.002	-14.7823	-23.4391	-7.81304	-28.1582	-30.1896	-24.0954	-23.4704	-33.096	-24.9757	2.13727
4.6588	0	520	0	530	0	525	0	535	0	535	0	535	0	535	0	535	0	525	0	535	0	535	0	535	0	0	531.538	1.43051	0.233	-30.6271	-30.9709	-22.9078	-30.8146	-14.5635	-22.5641	-7.188	-27.5644	-30.3771	-25.6893	-22.7828	-32.846	-24.908	2.20186
4.6688	0	520	0	530	0	525	0	535	0	535	0	535	0	535	0	535	0	525	0	535	0	535	0	535	0	0	531.538	1.43051	0.2335	-31.1897	-31.3459	-23.5329	-30.5646	-13.5322	-22.5328	-7.28175	-28.3457	-29.9396	-24.5329	-22.6891	-31.8772	-24.7804	2.22094
4.6788	0	520	0	530	0	525	0	535	0	535	0	535	0	535	0	535	0	525	0	535	0	535	0	535	0	0	531.538	1.43051	0.234	-31.0021	-30.7521	-24.0329	-29.7833	-14.3135	-22.064	-6.56295	-28.6895	-29.8771	-24.4392	-23.6579	-29.8771	-24.5876	2.16188
4.6888	0	520	0	530	0	525	0	535	0	535	0	535	0	535	0	535	0	525	0	535	0	535	0	535	0	0	531.538	1.43051	0.2345	-31.8459	-31.0021	-23.4704	-30.6271	-13.7822	-22.5953	-6.18793	-27.8457	-30.5334	-24.1892	-22.3765	-30.4396	-24.5746	2.26315
4.6989	0	520	0	530	0	525	0	535	0	535	0	535	0	535	0	535	0	525	0	535	0	535	0	535	0	0	531.538	1.43051	0.235	-31.5022	-31.0959	-23.5329	-30.0021	-14.9698	-22.7203	-5.28161	-28.752	-29.9396	-24.8142	-23.6266	-30.9396	-24.7647	2.26341
4.7089	0	520	0	530	0	525	0	535	0	535	0	535	0	535	0	535	0	525	0	535	0	535	0	535	0	0	531.538	1.43051	0.2355	-31.3459	-30.5959	-23.6891	-29.5333	-13.6572	-22.2828	-5.59414	-28.5957	-29.8771	-25.0642	-23.1891	-30.3458	-24.4809	2.25601
4.7189	0	520	0	530	0	525	0	535	0	535	0	535	0	535	0	535	0	525	0	535	0	535	0	535	0	0	531.538	1.43051	0.236	-30.5959	-30.9396	-23.1891	-30.5646	-15.1885	-22.6266	-4.56282	-28.3145	-30.7521	-24.7517	-23.6891	-29.1895	-24.5303	2.27165
4.7289	0	520	0	530	0	525	0	535	0	535	0	535	0	535	0	535	0	525	0	535	0	535	0	535	0	0	531.538	1.43051	0.2365	-31.0021	-30.8459	-23.5641	-29.5958	-14.5948	-23.4704	-4.93784	-27.7207	-30.4083	-24.6579	-21.689	-31.6897	-24.5147	2.29647
4.7389	0	520	0	530	0	525	0	535	0	535	0	535	0	535	0	535	0	525	0	535	0	535	0	535	0	0	531.538	1.43051	0.237	-31.5647	-30.8146	-23.5016	-30.6584	-15.7511	-22.5641	-2.59393	-28.6895	-30.1583	-25.3143	-23.5329	-30.3771	-24.6267	2.4221
4.749	0	520	0	530	0	525	0	535	0	535	0	535	0	535	0	535	0	525	0	535	0	535	0	535	0	0	531.538	1.43051	0.2375	-31.4397	-31.1897	-23.3454	-31.0334	-15.4073	-23.1266	-2.68769	-28.0332	-29.6583	-24.5954	-22.5328	-31.8772	-24.5772	2.45349
4.759	0	520	0	530	0	525	0	535	0	535	0	535	0	535	0	535	0	525	0	535	0	535	0	535	0	0	531.538	1.43051	0.238	-30.3771	-30.4396	-22.9078	-29.8458	-14.6573	-23.4079	-1.53136	-28.1895	-29.9083	-25.283	-22.0328	-31.5022	-24.1735	2.4983
4.769	0	520	0	530	0	525	0	535	0	535	0	535	0	535	0	535	0	525	0	535	0	535	0	535	0	0	531.538	1.43051	0.2385	-31.7209	-31.3459	-23.3766	-29.4083	-14.8448	-23.2829	-0.25002	-27.0644	-29.5333	-24.2204	-23.3141	-31.4397	-24.1501	2.59255
4.779	0	520	0	530	0	525	0	535	0	535	0	535	0	535	0	535	0	525	0	535	0	535	0	535	0	0	531.538	1.43051	0.239	-31.5959	-30.8771	-23.3454	-29.1895	-15.0948	-23.5641	0.09376	-29.4708	-30.9709	-24.1892	-23.6579	-31.1897	-24.421	2.64087
4.789	0	520	0	530	0	525	0	535	0	535	0	535	0	535	0	535	0	525	0	535	0	535	0	535	0	0	531.538	1.43051	0.2395	-30.9709	-30.8146	-23.0328	-29.3458	-15.1885	-22.3453	2.1564	-28.0019	-31.0959	-25.5018	-24.1892	-29.8458	-24.0147	2.74126
4.799	0	520	0	530	0	525	0	535	0	535	0	535	0	535	0	535	0	525	0	535	0	535	0	535	0	0	531.538	1.43051	0.24	-31.0959	-31.0334	-23.0953	-29.7833	-14.5635	-22.9703	2.06264	-29.377	-29.4395	-23.8141	-22.6578	-30.3771	-23.8454	2.75814
4.8091	0	520	0	530	0	525	0	535	0	535	0	535	0	535	0	535	0	525	0	535	0	535	0	535	0	0	531.538	1.43051	0.2405	-31.5334	-31.1272	-23.5329	-30.1896	-16.0011	-22.5641	2.12515	-29.9396	-29.5333	-24.8455	-23.4704	-33.4398	-24.5043	2.81715
4.8191	0	520	0	530	0	525	0	535	0	535	0	535	0	535	0	535	0	525	0	535	0	535	0	535	0	0	531.538	1.43051	0.241	-31.1897	-31.0646	-23.4391	-31.3772	-15.8448	-22.2828	5.59414	-27.0331	-30.1896	-24.1579	-23.4079	-31.5647	-23.8298	3.0231
4.8291	0	520	0	530	0	525	0	535	0	535	0	535	0	535	0	535	0	525	0	535	0	535	0	535	0	0	531.538	1.43051	0.2415	-31.7834	-31.0959	-24.3454	-32.096	-15.126	-22.7516	6.09417	-29.4083	-31.0334	-25.533	-21.814	-30.5021	-24.1162	3.12677
4.8391	0	520	0	530	0	525	0	535	0	535	0	535	0	535	0	535	0	525	0	535	0	535	0	535	0	0	531.538	1.43051	0.242	-31.4397	-31.4709	-24.0642	-31.971	-15.3761	-21.8765	7.46927	-26.033	-31.1584	-25.408	-24.9392	-32.1897	-24.0381	3.22067
4.8491	0	520	0	530	0	525	0	535	0	535	0	535	0	535	0	535	0	525	0	535	0	535	0	535	0	0	531.538	1.43051	0.2425	-31.4084	-30.9084	-23.3454	-30.9709	-14.376	-23.5329	8.93812	-29.002	-29.8458	-25.7518	-23.4079	-29.6896	-23.6084	3.2828
4.8592	0	520	0	530	0	525	0	535	0	535	0	535	0	535	0	535	0	525	0	535	0	535	0	535	0	0	531.538	1.43051	0.243	-31.4709	-31.1584	-22.7516	-29.9708	-15.1573	-23.0328	10.1257	-27.7832	-31.0959	-25.283	-23.3454	-31.0646	-23.499	3.37279
4.8692	0	520	0	530	0	525	0	535	0	535	0	535	0	535	0	535	0	525	0	535	0	535	0	535	0	0	531.538	1.43051	0.2435	-31.7522	-30.3458	-24.1579	-29.8458	-16.0324	-22.4391	11.9383	-29.8771	-30.8771	-25.1267	-22.0328	-31.1897	-23.4782	3.51129
4.8792	0	520	0	530	0	525	0	535	0	535	0	535	0	535	0	535	0	525	0	535	0	535	0	535	0	0	531.538	1.43051	0.244	-31.8772	-30.9396	-23.5641	-29.127	-16.8449	-22.3765	15.3761	-28.0644	-30.3146	-23.9079	-23.2516	-30.5646	-22.9547	3.72129
4.8892	0	520	0	530	0	525	0	535	0	535	0	535	0	535	0	535	0	525	0	535	0	535	0	535	0	0	531.538	1.43051	0.2445	-32.0022	-30.8146	-23.1891	-30.1583	-17.0949	-21.9703	15.9386	-28.1269	-31.5647	-23.9079	-24.0329	-31.8147	-23.2282	3.81796
4.8992	0	520	0	530	0	525	0	535	0	535	0	535	0	535	0	535	0	525	0	535	0	535	0	535	0	0	531.538	1.43051	0.245	-30.6271	-31.3147	-23.1891	-30.3771	-16.5949	-23.6579	17.2512	-27.8769	-30.3146	-23.6579	-23.7829	-31.5334	-22.9729	3.88716
4.9093	0	520	0	530	0	525	0	535	0	535	0	535	0	535	0	535	0	525	0	535	0	535	0	535	0	0	531.538	1.43051	0.2455	-31.3147	-30.9084	-23.7516	-29.002	-15.8761	-21.564	18.0637	-27.3456	-30.3458	-23.8141	-24.7517	-32.721	-22.7776	3.96747
4.9193	0	520	0	530	0	525	0	535	0	535	0	535	0	535	0	535	0	525	0	535	0	535	0	535	0	0	531.538	1.43051	0.246	-31.0021	-30.9084	-23.6891	-30.2521	-15.8136	-23.1578	20.2202	-27.9082	-30.1271	-23.9079	-23.8141	-31.3147	-22.6396	4.12241
4.9293	0	520	0	530	0	525	0	535	0	535	0	535	0	535	0	535	0	525	0	535	0	535	0	535	0	0	531.538	1.43051	0.2465	-31.5959	-31.3147	-23.6579	-30.4708	-16.0636	-23.9392	20.1264	-28.6582	-29.5645	-23.7829	-23.5641	-31.5647	-22.8375	4.13524
4.9393	0	520	0	530	0	525	0	535	0	535	0	535	0	535	0	535	0	525	0	535	0	535	0	535	0	0	531.538	1.43051	0.247	-31.9397	-31.4709	-23.1266	-30.1896	-15.8136	-22.064	20.9389	-28.502	-29.8146	-24.4704	-22.5016	-31.6272	-22.5484	4.20825
4.9493	0	520	0	530	0	525	0	535	0	535	0	535	0	535	0	535	0	525	0	535	0	535	0	535	0	0	531.538	1.43051	0.2475	-32.2835	-31.2834	-23.4704	-29.4708	-15.8761	-23.6266	21.5952	-28.6582	-29.6271	-24.1579	-25.1267	-32.6272	-22.8844	4.27385
4.9594	0	520	0	530	0	525	0	535	0	535	0	535	0	535	0	535	0	525	0	535	0	535	0	535	0	0	531.538	1.43051	0.248	-31.8459	-31.3459	-23.5016	-29.5958	-16.8137	-22.0953	19.1263	-28.4395	-30.4396	-23.5954	-23.1266	-31.8459	-22.7932	4.05308
4.9694	0	520	0	530	0	525	0	535	0	535	0	535	0	535	0	535	0	525	0	535	0	535	0	535	0	0	531.538	1.43051	0.2485	-32.0335	-31.1897	-23.8767	-31.1897	-16.0949	-23.2829	20.8452	-28.7832	-30.0646	-23.7516	-23.5329	-32.596	-22.9625	4.23097
4.9794	0	520	0	530	0	525	0	535	0	535	0	535	0	535	0	535	0	525	0	535	0	535	0	535	0	0	531.538	1.43051	0.249	-31.6584	-31.0334	-24.0329	-29.7833	-17.0012	-23.4079	20.9389	-28.4082	-29.7521	-23.7204	-23.3141	-32.8148	-22.8323	4.19669
4.9894	0	520	0	530	0	525	0	535	0	535	0	535	0	535	0	535	0	525	0	535	0	535	0	535	0	0	531.538	1.43051	0.2495	-31.8147	-30.7834	-23.2203	-30.9396	-16.3761	-21.1577	18.595	-28.1895	-30.5959	-23.4704	-23.1266	-32.4397	-22.7932	4.03793
4.9994	0	520	0	530	0	525	0	535	0	535	0	535	0	535	0	535	0	525	0	535	0	535	0	535	0	0	531.538	1.43051	0.25	-32.4085	-31.4397	-23.2516	-29.7208	-16.5949	-23.6579	19.6889	-29.1895	-30.8146	-24.1892	-22.9703	-31.7522	-23.025	4.12509
5.0094	0	520	0	530	0	525	0	535	0	535	0	535	0	535	0	535	0	525	0	535	0	535	0	535	0	0	531.538	1.43051	0.2505	-32.1897	-30.9084	-24.1892	-29.5333	-16.7199	-20.6264	19.1263	-28.8457	-30.9396	-24.0954	-23.5329	-32.0022	-22.8714	4.0735
5.0195	0	520	0	530	0	525	0	535	0	535	0	535	0	535	0	535	0	525	0	535	0	535	0	535	0	0	531.538	1.43051	0.251	-31.8147	-30.9084	-23.5329	-28.6582	-16.1886	-23.7829	19.1263	-29.0645	-29.8771	-24.2829	-24.5642	-32.8148	-23.0302	4.06263
5.0295	0	520	0	530	0	525	0	535	0	535	0	535	0	535	0	535	0	525	0	535	0	535	0	535	0	0	531.538	1.43051	0.2515	-31.7522	-31.1897	-23.4391	-28.2832	-17.7512	-21.9078	17.5637	-27.4081	-28.9082	-23.8454	-23.7516	-31.7209	-22.6995	3.86958
5.0395	0	520	0	530	0	525	0	535	0	535	0	535	0	535	0	535	0	525	0	535	0	535	0	535	0	0	531.538	1.43051	0.252	-31.4709	-31.8459	-23.4704	-28.6895	-17.2824	-21.6265	16.2511	-29.1895	-29.7833	-22.0953	-23.1891	-30.5646	-22.7464	3.79339
5.0495	0	520	0	530	0	525	0	535	0	535	0	535	0	535	0	535	0	525	0	535	0	535	0	535	0	0	531.538	1.43051	0.2525	-31.3772	-31.2834	-23.0953	-30.0958	-17.1887	-23.3141	16.5636	-28.752	-30.5959	-23.8454	-24.8455	-33.1273	-23.4131	3.87662
5.0595	0	520	0	530	0	525	0	535	0	535	0	535	0	535	0	535	0	525	0	535	0	535	0	535	0	0	531.538	1.43051	0.253	-32.1897	-31.1897	-23.3141	-30.1896	-17.1574	-21.314	15.5948	-28.252	-29.9396	-22.5328	-22.9391	-32.5022	-22.9938	3.79004
5.0696	0	520	0	530	0	525	0	535	0	535	0	535	0	535	0	535	0	525	0	535	0	535	0	535	0	0	531.538	1.43051	0.2535	-32.2835	-30.9084	-23.0641	-29.9708	-17.4075	-24.0017	15.0323	-28.3457	-29.9396	-25.2517	-23.4391	-31.8147	-23.4495	3.72677
5.0796	0	520	0	530	0	525	0	535	0	535	0	535	0	535	0	535	0	525	0	535	0	535	0	535	0	0	531.538	1.43051	0.254	-31.8772	-31.0959	-24.0954	-30.1583	-17.9075	-23.0016	14.5635	-28.627	-31.3459	-25.8768	-23.8141	-32.971	-23.8506	3.72821
5.0896	0	520	0	530	0	525	0	535	0	535	0	535	0	535	0	535	0	525	0	535	0	535	0	535	0	0	531.538	1.43051	0.2545	-32.0022	-31.5022	-23.7516	-30.6896	-17.97	-22.6578	13.4384	-27.3769	-30.1271	-23.8141	-22.2828	-31.0959	-23.3193	3.59044
5.0996	0	520	0	530	0	525	0	535	0	535	0	535	0	535	0	535	0	525	0	535	0	535	0	535	0	0	531.538	1.43051	0.255	-31.7834	-31.3772	-23.4079	-30.0333	-18.1262	-23.1578	11.532	-27.8457	-30.3458	-25.0642	-23.1891	-31.971	-23.7308	3.44767
5.1096	0	520	0	530	0	525	0	535	0	535	0	535	0	535	0	535	0	525	0	535	0	535	0	535	0	0	531.538	1.43051	0.2555	-31.5647	-30.4396	-23.3766	-30.1896	-17.845	-22.1578	11.1883	-27.8144	-30.0646	-24.2829	-24.1892	-32.8773	-23.6344	3.42178
5.1197	0	520	0	530	0	525	0	535	0	535	0	535	0	535	0	535	0	525	0	535	0	535	0	535	0	0	531.538	1.43051	0.256	-32.346	-30.6584	-23.0328	-30.3771	-17.1262	-22.1578	11.4383	-28.1895	-30.3458	-24.7205	-23.5641	-30.4396	-23.46	3.43622
5.1297	0	520	0	530	0	525	0	535	0	535	0	535	0	535	0	535	0	525	0	535	0	535	0	535	0	0	531.538	1.43051	0.2565	-31.8772	-30.5021	-23.1266	-29.127	-17.0324	-22.7828	10.6257	-29.6583	-30.1583	-24.0017	-22.6891	-31.4084	-23.4782	3.37507
5.1397	0	520	0	530	0	525	0	535	0	535	0	535	0	535	0	535	0	525	0	535	0	535	0	535	0	0	531.538	1.43051	0.257	-31.8772	-30.6584	-23.1266	-29.6271	-17.5012	-21.4077	9.06313	-28.1269	-29.9083	-24.0329	-23.4079	-30.5334	-23.4287	3.22396
5.1497	0	520	0	530	0	525	0	535	0	535	0	535	0	535	0	535	0	525	0	535	0	535	0	535	0	0	531.538	1.43051	0.2575	-31.6897	-30.9396	-22.8453	-29.4708	-17.2824	-21.9703	8.71935	-28.3145	-29.3458	-23.9392	-24.2829	-31.5647	-23.5771	3.21067
5.1597	0	520	0	530	0	525	0	535	0	535	0	535	0	535	0	535	0	525	0	535	0	535	0	535	0	0	531.538	1.43051	0.258	-32.096	-30.6271	-22.9391	-29.1583	-17.1574	-23.6266	7.93805	-28.4082	-29.5645	-24.5329	-22.1578	-31.4709	-23.6501	3.15342
5.1697	0	520	0	530	0	525	0	535	0	535	0	535	0	535	0	535	0	525	0	535	0	535	0	535	0	0	531.538	1.43051	0.2585	-31.7209	-30.4708	-23.0328	-28.6895	-18.1888	-22.3453	7.2505	-28.5957	-30.0646	-24.6267	-23.0641	-32.0022	-23.7959	3.08984
5.1798	0	520	0	530	0	525	0	535	0	535	0	535	0	535	0	535	0	525	0	535	0	535	0	535	0	0	531.538	1.43051	0.259	-31.8772	-30.8146	-23.4079	-29.1895	-17.97	-23.3766	6.65671	-28.7832	-30.7521	-24.8142	-23.2829	-31.2209	-24.0694	3.05764
5.1898	0	520	0	530	0	525	0	535	0	535	0	535	0	535	0	535	0	525	0	535	0	535	0	535	0	0	531.538	1.43051	0.2595	-31.6897	-30.8146	-23.2829	-30.5959	-18.095	-21.2827	4.56282	-28.0019	-29.8458	-24.1892	-23.9079	-31.2522	-24.0329	2.90049
5.1998	0	520	0	530	0	525	0	535	0	535	0	535	0	535	0	535	0	525	0	535	0	535	0	535	0	0	531.538	1.43051	0.26	-31.6272	-30.7521	-22.9703	-29.7833	-19.0951	-22.3453	4.00028	-29.0645	-29.2833	-25.1892	-24.1892	-31.6584	-24.3298	2.83571
5.2098	0	520	0	530	0	525	0	535	0	535	0	535	0	535	0	535	0	525	0	535	0	535	0	535	0	0	531.538	1.43051	0.2605	-32.1585	-30.8459	-23.1578	-29.4708	-17.9075	-22.0953	1.31259	-28.1895	-30.5021	-24.4392	-23.4704	-32.9398	-24.4887	2.70086
5.2198	0	520	0	530	0	525	0	535	0	535	0	535	0	535	0	535	0	525	0	535	0	535	0	535	0	0	531.538	1.43051	0.261	-32.9398	-30.9709	-23.5954	-31.0334	-18.8451	-22.6578	2.40642	-28.8457	-30.0333	-24.5954	-23.5641	-31.0646	-24.6449	2.76499
5.2299	0	520	0	530	0	525	0	535	0	535	0	535	0	535	0	535	0	525	0	535	0	535	0	535	0	0	531.538	1.43051	0.2615	-31.5647	-30.4708	-22.8141	-31.1897	-18.7513	-22.7516	-0.28127	-27.9082	-31.0646	-23.6266	-22.314	-32.971	-24.6423	2.59307
5.2399	0	520	0	530	0	525	0	535	0	535	0	535	0	535	0	535	0	525	0	535	0	535	0	535	0	0	531.538	1.43051	0.262	-31.7209	-31.0021	-23.1266	-32.096	-18.8451	-22.7203	-1.34384	-27.8457	-30.1583	-23.8141	-24.1892	-31.4084	-24.8559	2.48532
5.2499	0	520	0	530	0	525	0	535	0	535	0	535	0	535	0	535	0	525	0	535	0	535	0	535	0	0	531.538	1.43051	0.2625	-31.971	-30.7834	-22.8453	-32.0022	-18.095	-22.189	-1.18758	-27.3769	-30.2208	-23.5954	-23.5016	-29.8771	-24.4704	2.48613
5.2599	0	520	0	530	0	525	0	535	0	535	0	535	0	535	0	535	0	525	0	535	0	535	0	535	0	0	531.538	1.43051	0.263	-32.1272	-30.8146	-22.8453	-30.4083	-18.345	-23.6579	-4.09403	-27.5019	-30.0958	-24.3767	-23.1578	-31.8459	-24.9392	2.27716
5.2699	0	520	0	530	0	525	0	535	0	535	0	535	0	535	0	535	0	525	0	535	0	535	0	535	0	0	531.538	1.43051	0.2635	-32.1585	-30.6271	-23.1891	-31.0021	-19.2826	-22.4078	-5.93791	-28.0957	-29.7521	-22.8766	-24.908	-31.1272	-25.1137	2.13033
5.28	0	520	0	530	0	525	0	535	0	535	0	535	0	535	0	535	0	525	0	535	0	535	0	535	0	0	531.538	1.43051	0.264	-31.5959	-31.3459	-22.6266	-30.6896	-18.7513	-22.7828	-7.12549	-26.5956	-30.0021	-24.6579	-23.0953	-31.1272	-25.033	2.0488
5.29	0	520	0	530	0	525	0	535	0	535	0	535	0	535	0	535	0	525	0	535	0	535	0	535	0	0	531.538	1.43051	0.2645	-32.0335	-30.6584	-22.9078	-31.1897	-18.8763	-22.5641	-6.34419	-29.3145	-29.7208	-24.6267	-24.0954	-32.6272	-25.4132	2.15609
5.3	0	520	0	530	0	525	0	535	0	535	0	535	0	535	0	535	0	525	0	535	0	535	0	535	0	0	531.538	1.43051	0.265	-32.1585	-31.5647	-22.8141	-30.2521	-19.5951	-22.2515	-10.3445	-27.5019	-30.3458	-24.4079	-23.8767	-30.9084	-25.5018	1.83937
5.31	0	520	0	530	0	525	0	535	0	535	0	535	0	535	0	535	0	525	0	535	0	535	0	535	0	0	531.538	1.43051	0.2655	-32.3147	-31.0334	-22.8141	-30.1896	-19.4076	-21.7515	-11.5945	-29.127	-30.3146	-24.1892	-22.4078	-32.971	-25.6763	1.85426
5.32	0	520	0	530	0	525	0	535	0	535	0	535	0	535	0	535	0	525	0	535	0	535	0	535	0	0	531.538	1.43051	0.266	-31.1584	-31.0021	-22.8453	-30.9084	-19.6576	-22.9078	-12.6571	-27.1894	-30.6584	-24.8455	-23.7829	-31.7522	-25.7804	1.68632
5.3301	0	520	0	530	0	525	0	535	0	535	0	535	0	535	0	535	0	525	0	535	0	535	0	535	0	0	531.538	1.43051	0.2665	-31.3459	-30.7834	-22.9703	-30.0333	-19.1888	-22.8766	-14.001	-29.7521	-30.8459	-24.0642	-23.0328	-32.1585	-25.9211	1.66286
5.3401	0	520	0	530	0	525	0	535	0	535	0	535	0	535	0	535	0	525	0	535	0	535	0	535	0	0	531.538	1.43051	0.267	-32.3147	-31.1272	-23.0953	-31.2522	-19.7514	-22.3765	-15.0323	-26.4393	-30.0958	-22.9391	-24.3767	-32.596	-25.9497	1.62159
5.3501	0	520	0	530	0	525	0	535	0	535	0	535	0	535	0	535	0	525	0	535	0	535	0	535	0	0	531.538	1.43051	0.2675	-32.1897	-31.0021	-22.7828	-32.0335	-19.1888	-22.4703	-16.1886	-28.6895	-30.3146	-24.6892	-22.189	-31.6272	-26.1138	1.60209
5.3601	0	520	0	530	0	525	0	535	0	535	0	535	0	535	0	535	0	525	0	535	0	535	0	535	0	0	531.538	1.43051	0.268	-32.2522	-30.7521	-23.0953	-31.7834	-19.2513	-21.8765	-18.6888	-29.002	-28.5957	-24.5642	-23.4704	-32.1585	-26.2909	1.45821
5.3701	0	520	0	530	0	525	0	535	0	535	0	535	0	535	0	535	0	525	0	535	0	535	0	535	0	0	531.538	1.43051	0.2685	-32.7523	-30.8459	-23.1578	-31.1897	-19.8764	-22.3765	-18.47	-27.5644	-30.6271	-23.9079	-24.1267	-32.1272	-26.4185	1.45279
5.3801	0	520	0	530	0	525	0	535	0	535	0	535	0	535	0	535	0	525	0	535	0	535	0	535	0	0	531.538	1.43051	0.269	-32.1585	-30.7521	-22.8766	-31.6272	-19.9076	-22.4078	-18.5013	-29.1895	-30.7521	-24.8142	-23.9392	-33.1898	-26.6763	1.48934
5.3902	0	520	0	530	0	525	0	535	0	535	0	535	0	535	0	535	0	525	0	535	0	535	0	535	0	0	531.538	1.43051	0.2695	-32.8773	-30.7834	-22.5953	-30.6271	-20.2202	-22.189	-18.8138	-27.1269	-31.0646	-22.0328	-23.6579	-33.4711	-26.2883	1.52185
5.4002	0	520	0	530	0	525	0	535	0	535	0	535	0	535	0	535	0	525	0	535	0	535	0	535	0	0	531.538	1.43051	0.27	-32.6585	-30.4083	-23.3454	-29.1895	-20.7514	-22.5953	-19.4388	-29.502	-30.5646	-24.908	-24.0642	-30.7521	-26.5149	1.29281
5.4102	0	520	0	530	0	525	0	535	0	535	0	535	0	535	0	535	0	525	0	535	0	535	0	535	0	0	531.538	1.43051	0.2705	-33.0335	-30.5334	-22.4703	-30.6271	-20.0951	-23.0953	-20.1889	-27.8769	-31.6897	-24.1267	-24.0642	-33.1585	-26.7466	1.42667
5.4202	0	520	0	530	0	525	0	535	0	535	0	535	0	535	0	535	0	525	0	535	0	535	0	535	0	0	531.538	1.43051	0.271	-32.1585	-30.8146	-22.9703	-29.002	-20.8452	-21.6265	-20.5952	-28.5332	-31.1897	-24.6892	-23.0641	-31.9084	-26.4497	1.3211
5.4302	0	520	0	530	0	525	0	535	0	535	0	535	0	535	0	535	0	525	0	535	0	535	0	535	0	0	531.538	1.43051	0.2715	-32.1897	-30.7521	-22.4703	-27.6894	-19.9701	-22.6891	-20.6577	-27.6894	-30.4083	-24.2829	-23.9392	-32.4085	-26.2622	1.29626
5.4403	0	520	0	530	0	525	0	535	0	535	0	535	0	535	0	535	0	525	0	535	0	535	0	535	0	0	531.538	1.43051	0.272	-32.596	-30.9396	-22.7516	-30.1583	-19.8451	-22.7516	-22.4391	-28.1895	-30.2833	-23.7516	-23.4079	-33.6586	-26.731	1.35965
5.4503	0	520	0	530	0	525	0	535	0	535	0	535	0	535	0	535	0	525	0	535	0	535	0	535	0	0	531.538	1.43051	0.2725	-32.0335	-31.0959	-22.8453	-29.502	-19.8451	-23.3141	-21.3765	-27.9394	-30.1896	-24.3454	-24.3142	-32.596	-26.6164	1.28187
5.4603	0	520	0	530	0	525	0	535	0	535	0	535	0	535	0	535	0	525	0	535	0	535	0	535	0	0	531.538	1.43051	0.273	-32.0022	-30.7834	-22.9391	-30.6896	-20.4702	-22.6578	-22.3453	-28.1895	-30.1583	-24.5017	-22.4078	-33.9398	-26.7571	1.34495
5.4703	0	520	0	530	0	525	0	535	0	535	0	535	0	535	0	535	0	525	0	535	0	535	0	535	0	0	531.538	1.43051	0.2735	-32.1897	-31.0021	-22.9703	-30.9396	-21.1577	-21.8765	-23.3141	-28.1269	-30.0646	-24.908	-23.8767	-33.0335	-26.955	1.26086
5.4803	0	520	0	530	0	525	0	535	0	535	0	535	0	535	0	535	0	525	0	535	0	535	0	535	0	0	531.538	1.43051	0.274	-32.1585	-30.8459	-22.8141	-31.3459	-20.2514	-23.0016	-23.0016	-27.7519	-30.8146	-25.3455	-23.6891	-30.9396	-26.83	1.22881
5.4904	0	520	0	530	0	525	0	535	0	535	0	535	0	535	0	535	0	525	0	535	0	535	0	535	0	0	531.538	1.43051	0.2745	-32.9398	-31.1272	-22.5953	-31.0021	-20.0326	-21.1577	-22.314	-28.1895	-30.1896	-26.033	-23.0641	-31.7834	-26.7024	1.35457
5.5004	0	520	0	530	0	525	0	535	0	535	0	535	0	535	0	535	0	525	0	535	0	535	0	535	0	0	531.538	1.43051	0.275	-32.7523	-31.4397	-22.8453	-29.6583	-21.2515	-22.6891	-22.2203	-28.377	-30.3146	-24.8767	-24.0954	-32.0647	-26.8821	1.23985
5.5104	0	520	0	530	0	525	0	535	0	535	0	535	0	535	0	535	0	525	0	535	0	535	0	535	0	0	531.538	1.43051	0.2755	-33.0023	-31.0646	-23.0328	-30.9396	-20.5952	-22.314	-20.7827	-29.002	-30.1896	-24.3142	-23.9392	-31.7834	-26.7466	1.34367
5.5204	0	520	0	530	0	525	0	535	0	535	0	535	0	535	0	535	0	525	0	535	0	535	0	535	0	0	531.538	1.43051	0.276	-32.4085	-30.8771	-22.8766	-30.2833	-21.0952	-21.7515	-22.064	-27.9394	-29.9396	-24.6892	-23.7829	-31.9397	-26.6373	1.2519
5.5304	0	520	0	530	0	525	0	535	0	535	0	535	0	535	0	535	0	525	0	535	0	535	0	535	0	0	531.538	1.43051	0.2765	-32.596	-30.9709	-22.9703	-29.6896	-20.9702	-24.9392	-22.8453	-28.4395	-30.4083	-23.7829	-22.8453	-32.9085	-26.9472	1.24499
5.5404	0	520	0	530	0	525	0	535	0	535	0	535	0	535	0	535	0	525	0	535	0	535	0	535	0	0	531.538	1.43051	0.277	-32.7835	-31.1584	-22.8766	-30.9709	-21.6265	-22.5641	-23.6891	-26.7831	-30.2833	-24.0954	-23.0016	-29.1895	-26.5852	1.17101
5.5505	0	520	0	530	0	525	0	535	0	535	0	535	0	535	0	535	0	525	0	535	0	535	0	535	0	0	531.538	1.43051	0.2775	-32.221	-31.0334	-23.0953	-29.1895	-21.189	-22.0953	-23.4079	-28.5957	-30.5959	-24.6892	-24.0329	-30.6896	-26.7362	1.15697
5.5605	0	520	0	530	0	525	0	535	0	535	0	535	0	535	0	535	0	525	0	535	0	535	0	535	0	0	531.538	1.43051	0.278	-32.596	-31.3147	-23.1578	-29.0332	-20.9077	-23.1891	-23.8141	-28.1895	-29.7521	-24.5642	-25.1267	-31.8147	-26.955	1.14218
5.5705	0	520	0	530	0	525	0	535	0	535	0	535	0	535	0	535	0	525	0	535	0	535	0	535	0	0	531.538	1.43051	0.2785	-32.5335	-31.3772	-23.1891	-27.6269	-19.6889	-21.2827	-24.0642	-28.4707	-29.377	-24.0642	-21.8453	-30.4396	-26.1633	1.2489
5.5805	0	520	0	530	0	525	0	535	0	535	0	535	0	535	0	535	0	525	0	535	0	535	0	535	0	0	531.538	1.43051	0.279	-32.3147	-31.3459	-23.1578	-31.3147	-21.0327	-23.6891	-23.8141	-27.9082	-29.502	-24.2829	-23.1578	-32.1897	-26.9758	1.2104
5.5905	0	520	0	530	0	525	0	535	0	535	0	535	0	535	0	535	0	525	0	535	0	535	0	535	0	0	531.538	1.43051	0.2795	-32.4085	-31.3459	-23.1266	-29.0958	-21.314	-21.0327	-22.3765	-27.5957	-29.6271	-24.0329	-23.7829	-30.5646	-26.3586	1.20299
5.6006	0	520	0	530	0	525	0	535	0	535	0	535	0	535	0	535	0	525	0	535	0	535	0	535	0	0	531.538	1.43051	0.28	-32.6898	-30.5646	-23.1891	-30.3146	-21.4077	-24.2204	-22.7516	-28.4082	-31.1272	-24.4392	-25.3143	-32.1585	-27.2154	1.17456
5.6106	0	520	0	530	0	525	0	535	0	535	0	535	0	535	0	535	0	525	0	535	0	535	0	535	0	0	531.538	1.43051	0.2805	-32.2835	-30.8459	-23.1891	-30.5646	-21.4077	-22.2515	-23.7829	-27.4706	-29.8458	-23.9392	-23.6266	-34.3149	-26.9602	1.28117
5.6206	0	520	0	530	0	525	0	535	0	535	0	535	0	535	0	535	0	525	0	535	0	535	0	535	0	0	531.538	1.43051	0.281	-32.1897	-31.1584	-23.0953	-31.4397	-21.6265	-22.8141	-24.1579	-28.8145	-31.0646	-23.5016	-24.1892	-29.5645	-26.968	1.16831
5.6306	0	520	0	530	0	525	0	535	0	535	0	535	0	535	0	535	0	525	0	535	0	535	0	535	0	0	531.538	1.43051	0.2815	-32.721	-30.9396	-23.0953	-31.4397	-20.9389	-22.5328	-23.8141	-27.0956	-30.5646	-24.0642	-24.6892	-33.2835	-27.0982	1.27947
5.6406	0	520	0	530	0	525	0	535	0	535	0	535	0	535	0	535	0	525	0	535	0	535	0	535	0	0	531.538	1.43051	0.282	-32.971	-31.0334	-23.3141	-31.3147	-21.189	-22.064	-23.3766	-28.5645	-29.002	-24.3142	-23.1891	-32.6898	-26.9185	1.27882
5.6507	0	520	0	530	0	525	0	535	0	535	0	535	0	535	0	535	0	525	0	535	0	535	0	535	0	0	531.538	1.43051	0.2825	-32.2522	-31.1584	-23.0641	-31.0646	-21.564	-22.189	-24.0329	-28.1582	-29.4708	-24.2829	-24.0954	-32.471	-26.9836	1.20474
5.6607	0	520	0	530	0	525	0	535	0	535	0	535	0	535	0	535	0	525	0	535	0	535	0	535	0	0	531.538	1.43051	0.283	-33.0648	-30.6896	-23.4704	-30.9084	-21.8765	-22.3765	-23.5641	-27.8144	-30.1583	-23.2829	-23.5641	-31.5334	-26.8586	1.21273
5.6707	0	520	0	530	0	525	0	535	0	535	0	535	0	535	0	535	0	525	0	535	0	535	0	535	0	0	531.538	1.43051	0.2835	-33.2523	-31.1584	-23.3454	-30.7521	-22.314	-21.439	-23.6266	-28.377	-30.0646	-25.033	-24.7517	-32.2835	-27.1998	1.2177
5.6807	0	520	0	530	0	525	0	535	0	535	0	535	0	535	0	535	0	525	0	535	0	535	0	535	0	0	531.538	1.43051	0.284	-32.8773	-30.7209	-23.3141	-30.9084	-22.5016	-22.1265	-23.6266	-29.1583	-29.502	-24.3142	-23.6891	-31.8147	-27.0461	1.18342
5.6907	0	520	0	530	0	525	0	535	0	535	0	535	0	535	0	535	0	525	0	535	0	535	0	535	0	0	531.538	1.43051	0.2845	-32.596	-31.1897	-23.4079	-30.6896	-22.7828	-22.6578	-23.5641	-28.252	-29.7208	-23.5641	-23.7516	-30.8146	-26.9159	1.13359
5.7007	0	520	0	530	0	525	0	535	0	535	0	535	0	535	0	535	0	525	0	535	0	535	0	535	0	0	531.538	1.43051	0.285	-33.1585	-31.1584	-23.4704	-30.9396	-21.7828	-22.5953	-22.0328	-28.5332	-28.752	-23.5329	-24.3142	-31.8772	-26.8456	1.23904
5.7108	0	520	0	530	0	525	0	535	0	535	0	535	0	535	0	535	0	525	0	535	0	535	0	535	0	0	531.538	1.43051	0.2855	-32.6585	-31.1584	-23.3454	-29.7521	-21.189	-22.8141	-23.3454	-28.1269	-29.9083	-22.7828	-22.5328	-30.9084	-26.5435	1.21584
5.7208	0	520	0	530	0	525	0	535	0	535	0	535	0	535	0	535	0	525	0	535	0	535	0	535	0	0	531.538	1.43051	0.286	-32.1272	-30.8146	-22.9703	-30.8459	-22.0015	-22.3453	-23.4079	-27.1269	-28.9707	-22.5641	-23.7516	-32.1585	-26.5904	1.20022
5.7308	0	520	0	530	0	525	0	535	0	535	0	535	0	535	0	535	0	525	0	535	0	535	0	535	0	0	531.538	1.43051	0.2865	-32.971	-31.1272	-23.1578	-30.7521	-22.1578	-22.9078	-22.9703	-28.3145	-29.5958	-24.1892	-24.0954	-31.7522	-26.9993	1.18496
5.7408	0	520	0	530	0	525	0	535	0	535	0	535	0	535	0	535	0	525	0	535	0	535	0	535	0	0	531.538	1.43051	0.287	-32.9398	-31.1897	-23.1578	-31.6272	-22.1265	-22.7203	-22.9703	-28.6895	-29.3145	-24.8767	-25.533	-31.4709	-27.218	1.17293
5.7508	0	520	0	530	0	525	0	535	0	535	0	535	0	535	0	535	0	525	0	535	0	535	0	535	0	0	531.538	1.43051	0.2875	-32.9085	-31.3459	-23.4704	-30.7521	-22.6266	-22.4391	-22.9703	-29.2833	-30.0646	-24.1892	-24.8142	-31.3772	-27.1868	1.17591
5.7609	0	520	0	530	0	525	0	535	0	535	0	535	0	535	0	535	0	525	0	535	0	535	0	535	0	0	531.538	1.43051	0.288	-33.4711	-31.7522	-24.0329	-33.6273	-22.3765	-22.7203	-22.5016	-28.6582	-30.1896	-24.0642	-23.3454	-31.4084	-27.3456	1.32004
5.7709	0	520	0	530	0	525	0	535	0	535	0	535	0	535	0	535	0	525	0	535	0	535	0	535	0	0	531.538	1.43051	0.2885	-33.6586	-31.5022	-23.1891	-32.7523	-23.6266	-21.564	-23.1891	-28.752	-31.3772	-23.6891	-23.9704	-32.0647	-27.4446	1.3295
5.7809	0	520	0	530	0	525	0	535	0	535	0	535	0	535	0	535	0	525	0	535	0	535	0	535	0	0	531.538	1.43051	0.289	-33.0648	-31.7209	-23.0953	-31.4709	-22.064	-23.1266	-23.1578	-28.9707	-30.2833	-25.3455	-22.9391	-29.502	-27.0618	1.19513
5.7909	0	520	0	530	0	525	0	535	0	535	0	535	0	535	0	535	0	525	0	535	0	535	0	535	0	0	531.538	1.43051	0.2895	-32.6272	-30.9709	-24.0017	-31.0646	-22.064	-22.5953	-22.7203	-28.252	-29.0645	-24.5017	-24.1579	-31.7522	-26.981	1.16044
5.8009	0	520	0	530	0	525	0	535	0	535	0	535	0	535	0	535	0	525	0	535	0	535	0	535	0	0	531.538	1.43051	0.29	-33.096	-31.1584	-23.3766	-31.3772	-22.314	-23.1891	-23.9392	-27.9082	-30.2833	-23.4079	-23.5329	-31.2522	-27.0696	1.1907
5.811	0	520	0	530	0	525	0	535	0	535	0	535	0	535	0	535	0	525	0	535	0	535	0	535	0	0	531.538	1.43051	0.2905	-33.346	-31.1897	-23.3454	-31.9084	-22.8453	-23.6579	-21.5327	-27.5957	-29.7833	-23.3454	-23.6891	-31.5959	-26.9862	1.25268
5.821	0	520	0	530	0	525	0	535	0	535	0	535	0	535	0	535	0	525	0	535	0	535	0	535	0	0	531.538	1.43051	0.291	-32.7523	-31.1272	-23.1266	-29.502	-22.7828	-23.3141	-23.2829	-29.7833	-30.0021	-24.0329	-25.658	-31.5959	-27.2467	1.11576
5.831	0	520	0	530	0	525	0	535	0	535	0	535	0	535	0	535	0	525	0	535	0	535	0	535	0	0	531.538	1.43051	0.2915	-32.9085	-31.6584	-23.3766	-29.8458	-23.2516	-22.5641	-23.0016	-27.9394	-31.0959	-23.7829	-23.4704	-31.3459	-27.0201	1.18993
5.841	0	520	0	530	0	525	0	535	0	535	0	535	0	535	0	535	0	525	0	535	0	535	0	535	0	0	531.538	1.43051	0.292	-33.0023	-31.3772	-23.4079	-29.4083	-22.2515	-21.8765	-24.5329	-29.3458	-29.8146	-24.3454	-23.8767	-29.7833	-26.9185	1.12367
5.851	0	520	0	530	0	525	0	535	0	535	0	535	0	535	0	535	0	525	0	535	0	535	0	535	0	0	531.538	1.43051	0.2925	-32.8148	-31.7522	-23.0641	-30.4708	-22.6266	-22.6891	-21.9078	-26.6893	-29.9396	-24.0954	-23.3141	-30.2833	-26.6373	1.19194
5.8611	0	520	0	530	0	525	0	535	0	535	0	535	0	535	0	535	0	525	0	535	0	535	0	535	0	0	531.538	1.43051	0.293	-32.7523	-31.1897	-22.7828	-30.2521	-22.9391	-22.064	-23.0016	-30.5021	-29.502	-24.2829	-23.3141	-31.2522	-26.9862	1.21049
5.8711	0	520	0	530	0	525	0	535	0	535	0	535	0	535	0	535	0	525	0	535	0	535	0	535	0	0	531.538	1.43051	0.2935	-32.6898	-31.3459	-23.1891	-30.7834	-21.939	-22.314	-23.2516	-28.4082	-29.6583	-24.0954	-24.0017	-29.502	-26.7649	1.14744
5.8811	0	520	0	530	0	525	0	535	0	535	0	535	0	535	0	535	0	525	0	535	0	535	0	535	0	0	531.538	1.43051	0.294	-32.1272	-31.3772	-23.2516	-30.5334	-22.9078	-22.9703	-23.3454	-29.8771	-30.1583	-23.9079	-24.3454	-32.1897	-27.2493	1.16571
5.8911	0	520	0	530	0	525	0	535	0	535	0	535	0	535	0	535	0	525	0	535	0	535	0	535	0	0	531.538	1.43051	0.2945	-33.0335	-31.6584	-23.1266	-31.6584	-22.7828	-22.8141	-22.6891	-27.7519	-29.5958	-24.5329	-25.158	-31.5334	-27.1946	1.18571
5.9011	0	520	0	530	0	525	0	535	0	535	0	535	0	535	0	535	0	525	0	535	0	535	0	535	0	0	531.538	1.43051	0.295	-33.4711	-31.4397	-22.8453	-31.0021	-21.8453	-22.314	-23.1578	-29.5645	-29.4083	-24.1892	-23.4391	-31.3459	-27.0019	1.26131
5.9111	0	520	0	530	0	525	0	535	0	535	0	535	0	535	0	535	0	525	0	535	0	535	0	535	0	0	531.538	1.43051	0.2955	-32.846	-31.3772	-23.1891	-31.1897	-23.8767	-21.939	-23.1578	-29.5333	-29.377	-25.5018	-23.8454	-31.0334	-27.2389	1.1527
5.9212	0	520	0	530	0	525	0	535	0	535	0	535	0	535	0	535	0	525	0	535	0	535	0	535	0	0	531.538	1.43051	0.296	-32.9398	-31.8459	-22.6266	-30.3458	-23.1578	-22.9078	-24.1892	-29.0645	-29.7833	-24.8142	-23.2516	-31.2834	-27.1842	1.15887
5.9312	0	520	0	530	0	525	0	535	0	535	0	535	0	535	0	535	0	525	0	535	0	535	0	535	0	0	531.538	1.43051	0.2965	-33.0648	-31.0646	-23.8141	-29.0332	-23.3141	-23.0016	-22.8766	-28.9707	-29.8146	-23.5016	-22.8766	-31.1897	-26.8769	1.14343
5.9412	0	520	0	530	0	525	0	535	0	535	0	535	0	535	0	535	0	525	0	535	0	535	0	535	0	0	531.538	1.43051	0.297	-32.7835	-31.3459	-23.0953	-30.0646	-22.6266	-23.1891	-23.1891	-28.252	-30.3771	-23.8141	-23.8454	-31.3772	-26.9967	1.15922
5.9512	0	520	0	530	0	525	0	535	0	535	0	535	0	535	0	535	0	525	0	535	0	535	0	535	0	0	531.538	1.43051	0.2975	-32.5647	-31.1272	-23.3141	-30.4708	-22.6578	-22.0328	-21.4702	-28.4707	-30.0646	-25.0642	-23.1891	-31.5334	-26.83	1.22403
5.9612	0	520	0	530	0	525	0	535	0	535	0	535	0	535	0	535	0	525	0	535	0	535	0	535	0	0	531.538	1.43051	0.298	-32.6898	-31.6584	-23.8141	-29.4395	-22.7516	-23.3454	-21.6265	-28.3145	-28.6895	-23.9704	-23.0641	-30.8771	-26.6867	1.14668
5.9713	0	520	0	530	0	525	0	535	0	535	0	535	0	535	0	535	0	525	0	535	0	535	0	535	0	0	531.538	1.43051	0.2985	-32.0335	-31.1584	-23.9079	-29.0958	-22.1265	-22.7828	-22.5016	-28.9082	-30.4396	-25.7518	-23.5016	-31.1897	-26.9498	1.11852
5.9813	0	520	0	530	0	525	0	535	0	535	0	535	0	535	0	535	0	525	0	535	0	535	0	535	0	0	531.538	1.43051	0.299	-32.7523	-32.1585	-23.1266	-30.6271	-22.9703	-22.9078	-23.0016	-29.4083	-29.3145	-24.2517	-23.3454	-29.8146	-26.9732	1.15735
5.9913	0	520	0	530	0	525	0	535	0	535	0	535	0	535	0	535	0	525	0	535	0	535	0	535	0	0	531.538	1.43051	0.2995	-33.0335	-31.6272	-23.5016	-29.8771	-22.4391	-21.689	-22.7516	-28.377	-29.7833	-24.4392	-23.8141	-31.8147	-26.9289	1.21499
6.0013	0	520	0	530	0	525	0	535	0	535	0	535	0	535	0	535	0	525	0	535	0	535	0	535	0	0	531.538	1.43051	0.3	-32.5022	-31.5022	-23.3141	-30.5959	-23.0328	-22.9391	-21.8765	-29.5645	-29.502	-24.7517	-21.6578	-29.3145	-26.7128	1.18813
6.0113	0	520	0	530	0	525	0	535	0	535	0	535	0	535	0	535	0	525	0	535	0	535	0	535	0	0	531.538	1.43051	0.3005	-32.2522	-31.6897	-22.9703	-30.6271	-21.8765	-23.0328	-22.5953	-29.1583	-28.5645	-24.2829	-23.4704	-31.5647	-26.8404	1.19291
6.0214	0	520	0	530	0	525	0	535	0	535	0	535	0	535	0	535	0	525	0	535	0	535	0	535	0	0	531.538	1.43051	0.301	-32.6898	-31.4709	-23.1266	-30.5646	-22.9391	-21.7828	-22.6891	-29.0645	-29.1583	-24.1892	-23.7516	-30.5021	-26.8274	1.17308
6.0314	0	520	0	530	0	525	0	535	0	535	0	535	0	535	0	535	0	525	0	535	0	535	0	535	0	0	531.538	1.43051	0.3015	-32.9085	-31.8459	-23.1891	-30.5959	-22.6578	-24.7517	-21.5327	-29.502	-29.0645	-24.1892	-24.2829	-31.3772	-27.1581	1.18165
6.0414	0	520	0	530	0	525	0	535	0	535	0	535	0	535	0	535	0	525	0	535	0	535	0	535	0	0	531.538	1.43051	0.302	-32.1272	-31.4084	-22.8141	-33.1273	-23.3766	-22.7828	-21.3452	-27.6582	-29.8771	-25.0017	-23.4704	-30.5021	-26.9576	1.23424
6.0514	0	520	0	530	0	525	0	535	0	535	0	535	0	535	0	535	0	525	0	535	0	535	0	535	0	0	531.538	1.43051	0.3025	-32.2835	-31.5959	-22.9391	-31.0334	-22.4703	-22.9703	-21.8765	-28.752	-29.9708	-23.9392	-23.3141	-30.5334	-26.8065	1.20507
6.0614	0	520	0	530	0	525	0	535	0	535	0	535	0	535	0	535	0	525	0	535	0	535	0	535	0	0	531.538	1.43051	0.303	-32.5335	-31.5022	-23.0953	-32.0647	-22.6578	-22.7828	-21.8453	-28.9082	-29.8771	-23.7829	-23.6579	-29.252	-26.83	1.20968
6.0714	0	520	0	530	0	525	0	535	0	535	0	535	0	535	0	535	0	525	0	535	0	535	0	535	0	0	531.538	1.43051	0.3035	-32.1272	-31.4709	-22.4703	-30.6584	-22.3453	-20.6264	-21.439	-29.6896	-30.0958	-23.5329	-23.0641	-30.2833	-26.4836	1.30646
6.0815	0	520	0	530	0	525	0	535	0	535	0	535	0	535	0	535	0	525	0	535	0	535	0	535	0	0	531.538	1.43051	0.304	-31.9397	-30.9396	-22.9078	-30.1271	-21.6265	-24.5642	-22.4078	-29.7208	-29.6271	-22.9391	-25.4393	-30.3146	-26.8795	1.12272
6.0915	0	520	0	530	0	525	0	535	0	535	0	535	0	535	0	535	0	525	0	535	0	535	0	535	0	0	531.538	1.43051	0.3045	-32.1897	-31.3459	-23.0016	-30.8146	-22.6266	-21.5952	-21.6265	-29.0645	-29.8771	-24.3454	-23.5641	-30.5959	-26.7206	1.22151
6.1015	0	520	0	530	0	525	0	535	0	535	0	535	0	535	0	535	0	525	0	535	0	535	0	535	0	0	531.538	1.43051	0.305	-32.4397	-32.4397	-23.2516	-30.4083	-20.9077	-23.8141	-22.7828	-29.252	-29.9083	-23.3141	-22.5953	-31.7209	-26.9029	1.28685
6.1115	0	520	0	530	0	525	0	535	0	535	0	535	0	535	0	535	0	525	0	535	0	535	0	535	0	0	531.538	1.43051	0.3055	-32.096	-31.5959	-22.9391	-30.4083	-22.9703	-22.5016	-22.9391	-29.002	-30.0021	-24.1267	-22.1265	-28.9082	-26.6347	1.15218
6.1215	0	520	0	530	0	525	0	535	0	535	0	535	0	535	0	535	0	525	0	535	0	535	0	535	0	0	531.538	1.43051	0.306	-32.1585	-31.0959	-22.9078	-32.5022	-23.5954	-21.5952	-21.814	-29.0332	-30.2833	-24.6267	-23.4704	-30.7834	-26.9888	1.24749
6.1316	0	520	0	530	0	525	0	535	0	535	0	535	0	535	0	535	0	525	0	535	0	535	0	535	0	0	531.538	1.43051	0.3065	-32.1897	-31.5022	-23.3766	-29.4708	-22.8141	-24.783	-21.564	-29.6583	-29.7833	-23.8141	-23.6891	-29.8458	-26.8743	1.1087
6.1416	0	520	0	530	0	525	0	535	0	535	0	535	0	535	0	535	0	525	0	535	0	535	0	535	0	0	531.538	1.43051	0.307	-32.2835	-31.5959	-23.5641	-31.5959	-23.1266	-21.314	-19.8139	-29.0645	-30.5646	-23.6891	-23.4079	-31.7522	-26.8144	1.35943
6.1516	0	520	0	530	0	525	0	535	0	535	0	535	0	535	0	535	0	525	0	535	0	535	0	535	0	0	531.538	1.43051	0.3075	-32.0647	-31.2522	-23.5641	-32.096	-22.189	-23.8141	-21.939	-29.0645	-30.3458	-23.3454	-23.2829	-32.0022	-27.08	1.25526
6.1616	0	520	0	530	0	525	0	535	0	535	0	535	0	535	0	535	0	525	0	535	0	535	0	535	0	0	531.538	1.43051	0.308	-31.971	-31.1584	-23.4391	-30.5646	-21.8453	-21.4077	-21.439	-28.2832	-30.3458	-23.5329	-23.5954	-30.8146	-26.5331	1.24483
6.1716	0	520	0	530	0	525	0	535	0	535	0	535	0	535	0	535	0	525	0	535	0	535	0	535	0	0	531.538	1.43051	0.3085	-32.1897	-31.7209	-23.3766	-32.0022	-22.5328	-22.189	-22.5641	-29.4708	-31.2834	-23.5329	-23.5016	-29.6583	-27.0019	1.24903
6.1817	0	520	0	530	0	525	0	535	0	535	0	535	0	535	0	535	0	525	0	535	0	535	0	535	0	0	531.538	1.43051	0.309	-31.4397	-31.4397	-23.6266	-32.0647	-22.3765	-23.0953	-22.314	-28.6895	-29.4708	-23.7829	-22.6891	-30.7521	-26.8117	1.1889
6.1917	0	520	0	530	0	525	0	535	0	535	0	535	0	535	0	535	0	525	0	535	0	535	0	535	0	0	531.538	1.43051	0.3095	-32.5022	-31.5334	-22.5641	-30.5334	-22.5328	-22.8766	-21.4077	-28.5645	-29.5645	-24.1267	-24.4704	-30.6271	-26.7753	1.19167
6.2017	0	520	0	530	0	525	0	535	0	535	0	535	0	535	0	535	0	525	0	535	0	535	0	535	0	0	531.538	1.43051	0.31	-32.0647	-31.4709	-23.1266	-30.0333	-22.8141	-23.0328	-21.9703	-29.3145	-30.5334	-24.2517	-23.0328	-29.2833	-26.744	1.148
6.2117	0	520	0	530	0	525	0	535	0	535	0	535	0	535	0	535	0	525	0	535	0	535	0	535	0	0	531.538	1.43051	0.3105	-32.3772	-31.5334	-22.8453	-30.6896	-22.4703	-22.8141	-22.4078	-29.2833	-30.8771	-24.5017	-23.5641	-29.8458	-26.9342	1.18644
6.2217	0	520	0	530	0	525	0	535	0	535	0	535	0	535	0	535	0	525	0	535	0	535	0	535	0	0	531.538	1.43051	0.311	-32.221	-31.5334	-22.7516	-31.0334	-22.189	-23.1891	-19.6889	-28.2832	-29.7521	-23.2829	-21.6578	-31.5022	-26.4237	1.35152
6.2318	0	520	0	530	0	525	0	535	0	535	0	535	0	535	0	535	0	525	0	535	0	535	0	535	0	0	531.538	1.43051	0.3115	-32.1897	-31.8772	-23.5954	-29.5958	-22.4078	-23.0953	-21.5015	-29.3145	-30.1896	-24.1892	-22.7828	-32.3147	-26.9211	1.24622
6.2418	0	520	0	530	0	525	0	535	0	535	0	535	0	535	0	535	0	525	0	535	0	535	0	535	0	0	531.538	1.43051	0.312	-32.471	-31.6272	-23.0016	-29.6896	-22.064	-23.3766	-21.3452	-27.9707	-29.8146	-23.3766	-23.4079	-30.0958	-26.5201	1.18625
6.2518	0	520	0	530	0	525	0	535	0	535	0	535	0	535	0	535	0	525	0	535	0	535	0	535	0	0	531.538	1.43051	0.3125	-32.0335	-31.1897	-22.3765	-28.7832	-22.5953	-22.4703	-20.0326	-28.6582	-30.1583	-23.3766	-23.6891	-30.0021	-26.2805	1.21706
6.2618	0	520	0	530	0	525	0	535	0	535	0	535	0	535	0	535	0	525	0	535	0	535	0	535	0	0	531.538	1.43051	0.313	-32.4085	-31.2834	-23.4704	-29.5333	-23.0016	-22.9391	-20.3139	-29.3145	-30.0021	-23.8141	-23.1891	-30.8771	-26.6789	1.22008
6.2718	0	520	0	530	0	525	0	535	0	535	0	535	0	535	0	535	0	525	0	535	0	535	0	535	0	0	531.538	1.43051	0.3135	-33.1273	-31.5022	-22.9078	-31.1272	-23.1266	-22.4703	-20.8452	-28.3457	-29.8458	-23.3141	-23.5954	-31.5647	-26.8144	1.29248
6.2818	0	520	0	530	0	525	0	535	0	535	0	535	0	535	0	535	0	525	0	535	0	535	0	535	0	0	531.538	1.43051	0.314	-32.0022	-31.0959	-23.0641	-30.4083	-22.4391	-23.8141	-21.3765	-30.3146	-29.8146	-24.4704	-23.2516	-31.0334	-26.9237	1.19036
6.2919	0	520	0	530	0	525	0	535	0	535	0	535	0	535	0	535	0	525	0	535	0	535	0	535	0	0	531.538	1.43051	0.3145	-32.3147	-31.2834	-22.8766	-31.4084	-22.314	-23.0328	-21.8765	-27.7832	-30.8771	-24.6579	-23.8141	-29.8146	-26.8378	1.18662
6.3019	0	520	0	530	0	525	0	535	0	535	0	535	0	535	0	535	0	525	0	535	0	535	0	535	0	0	531.538	1.43051	0.315	-32.1897	-31.6272	-23.1578	-31.3459	-23.4391	-24.4079	-22.064	-30.1896	-30.0333	-23.5329	-22.2828	-32.346	-27.218	1.25352
6.3119	0	520	0	530	0	525	0	535	0	535	0	535	0	535	0	535	0	525	0	535	0	535	0	535	0	0	531.538	1.43051	0.3155	-32.096	-31.5959	-23.0953	-30.7834	-23.6579	-22.1578	-21.7203	-26.9706	-29.377	-23.6579	-23.6579	-30.0333	-26.5669	1.1484
6.3219	0	520	0	530	0	525	0	535	0	535	0	535	0	535	0	535	0	525	0	535	0	535	0	535	0	0	531.538	1.43051	0.316	-32.6585	-30.7521	-23.6266	-30.7521	-22.5328	-22.4391	-21.439	-29.6896	-30.1896	-23.7829	-23.5329	-30.6584	-26.8378	1.2188
6.3319	0	520	0	530	0	525	0	535	0	535	0	535	0	535	0	535	0	525	0	535	0	535	0	535	0	0	531.538	1.43051	0.3165	-32.1897	-31.6272	-23.3454	-30.1583	-22.8766	-24.1267	-22.3765	-29.0958	-30.9084	-23.7516	-23.0328	-29.8458	-26.9446	1.1426
6.342	0	520	0	530	0	525	0	535	0	535	0	535	0	535	0	535	0	525	0	535	0	535	0	535	0	0	531.538	1.43051	0.317	-32.1897	-31.5959	-23.5641	-30.2521	-22.8141	-23.0641	-20.9389	-27.6269	-28.3457	-25.1892	-23.8141	-31.0021	-26.6998	1.13736
6.352	0	520	0	530	0	525	0	535	0	535	0	535	0	535	0	535	0	525	0	535	0	535	0	535	0	0	531.538	1.43051	0.3175	-32.0647	-31.1897	-23.0641	-30.6584	-22.4078	-22.9703	-21.2515	-30.2521	-29.3458	-26.4081	-24.1579	-30.7834	-27.0461	1.17178
6.362	0	520	0	530	0	525	0	535	0	535	0	535	0	535	0	535	0	525	0	535	0	535	0	535	0	0	531.538	1.43051	0.318	-31.9397	-31.6897	-24.0954	-30.1583	-21.6265	-22.8453	-21.0014	-27.3144	-30.0958	-25.3768	-24.0954	-31.5022	-26.8117	1.1919
6.372	0	520	0	530	0	525	0	535	0	535	0	535	0	535	0	535	0	525	0	535	0	535	0	535	0	0	531.538	1.43051	0.3185	-32.3147	-31.971	-22.8766	-28.4395	-21.9703	-22.8141	-19.2826	-28.4707	-30.0646	-22.6578	-23.3141	-32.096	-26.356	1.3467
6.382	0	520	0	530	0	525	0	535	0	535	0	535	0	535	0	535	0	525	0	535	0	535	0	535	0	0	531.538	1.43051	0.319	-31.9397	-31.8459	-23.0328	-30.0021	-21.6265	-23.0641	-20.9702	-27.0019	-30.8771	-25.3143	-23.5016	-29.3458	-26.5435	1.18856
6.3921	0	520	0	530	0	525	0	535	0	535	0	535	0	535	0	535	0	525	0	535	0	535	0	535	0	0	531.538	1.43051	0.3195	-32.1585	-32.1897	-23.6891	-29.5958	-22.6266	-23.1266	-20.8764	-30.3771	-30.8771	-24.4392	-23.9704	-31.2522	-27.0982	1.24014
6.4021	0	520	0	530	0	525	0	535	0	535	0	535	0	535	0	535	0	525	0	535	0	535	0	535	0	0	531.538	1.43051	0.32	-32.0647	-31.6897	-22.9078	-30.7834	-23.3141	-23.0016	-21.4702	-28.0332	-29.502	-24.9705	-23.5016	-30.1583	-26.7831	1.14134
6.4121	0	520	0	530	0	525	0	535	0	535	0	535	0	535	0	535	0	525	0	535	0	535	0	535	0	0	531.538	1.43051	0.3205	-32.0022	-31.3772	-23.3141	-30.8771	-22.5328	-23.4704	-20.4077	-29.127	-30.0646	-23.8141	-23.2829	-31.7522	-26.8352	1.25774
6.4221	0	520	0	530	0	525	0	535	0	535	0	535	0	535	0	535	0	525	0	535	0	535	0	535	0	0	531.538	1.43051	0.321	-31.9084	-31.8459	-23.1578	-30.0333	-22.6578	-22.6266	-21.1577	-28.377	-29.7833	-24.4704	-23.8767	-30.9396	-26.7362	1.18109
6.4321	0	520	0	530	0	525	0	535	0	535	0	535	0	535	0	535	0	525	0	535	0	535	0	535	0	0	531.538	1.43051	0.3215	-31.9084	-31.5022	-22.9078	-31.9397	-22.064	-22.6578	-20.8139	-29.3458	-29.6271	-24.9392	-23.8141	-31.4084	-26.9107	1.27069
6.4421	0	520	0	530	0	525	0	535	0	535	0	535	0	535	0	535	0	525	0	535	0	535	0	535	0	0	531.538	1.43051	0.322	-31.8147	-32.5647	-23.3454	-30.1896	-22.3453	-22.5641	-21.3452	-28.9395	-30.0021	-24.7517	-23.4704	-32.096	-26.9524	1.25296
6.4522	0	520	0	530	0	525	0	535	0	535	0	535	0	535	0	535	0	525	0	535	0	535	0	535	0	0	531.538	1.43051	0.3225	-31.7209	-31.3772	-23.5954	-31.8772	-23.5641	-23.9392	-22.314	-29.0645	-29.4083	-24.3142	-24.3767	-29.6271	-27.0982	1.0692
6.4622	0	520	0	530	0	525	0	535	0	535	0	535	0	535	0	535	0	525	0	535	0	535	0	535	0	0	531.538	1.43051	0.323	-31.6897	-31.6272	-23.1891	-32.1897	-22.189	-22.7828	-20.3139	-28.5957	-29.0645	-24.2829	-23.9704	-30.9709	-26.7388	1.25774
6.4722	0	520	0	530	0	525	0	535	0	535	0	535	0	535	0	535	0	525	0	535	0	535	0	535	0	0	531.538	1.43051	0.3235	-31.7834	-31.9397	-23.0953	-31.7522	-22.8141	-22.4703	-20.4702	-28.1895	-29.8458	-24.0954	-23.4704	-31.0334	-26.7466	1.2664
6.4822	0	520	0	530	0	525	0	535	0	535	0	535	0	535	0	535	0	525	0	535	0	535	0	535	0	0	531.538	1.43051	0.324	-31.8459	-31.6584	-23.3766	-31.1897	-22.189	-22.7203	-20.4077	-29.4395	-29.3145	-24.1892	-22.3453	-29.8771	-26.5461	1.25368
6.4922	0	520	0	530	0	525	0	535	0	535	0	535	0	535	0	535	0	525	0	535	0	535	0	535	0	0	531.538	1.43051	0.3245	-31.4397	-31.5334	-23.5641	-30.9396	-21.6265	-23.1266	-21.9078	-27.9707	-29.2833	-24.0017	-22.5328	-30.4708	-26.5331	1.17399
6.5023	0	520	0	530	0	525	0	535	0	535	0	535	0	535	0	535	0	525	0	535	0	535	0	535	0	0	531.538	1.43051	0.325	-32.7523	-31.5022	-23.4391	-30.6896	-22.4078	-23.3141	-20.9077	-28.1895	-29.002	-24.5642	-23.6891	-31.8147	-26.856	1.22069
6.5123	0	520	0	530	0	525	0	535	0	535	0	535	0	535	0	535	0	525	0	535	0	535	0	535	0	0	531.538	1.43051	0.3255	-32.5022	-31.8459	-23.6891	-29.9083	-23.0016	-23.1891	-19.7201	-28.6582	-29.8146	-25.0642	-24.1892	-29.7521	-26.7779	1.18701
6.5223	0	520	0	530	0	525	0	535	0	535	0	535	0	535	0	535	0	525	0	535	0	535	0	535	0	0	531.538	1.43051	0.326	-32.1585	-31.4084	-23.8454	-30.7521	-21.189	-23.3141	-21.3765	-28.752	-30.5959	-24.3142	-24.9392	-29.7208	-26.8638	1.17966
6.5323	0	520	0	530	0	525	0	535	0	535	0	535	0	535	0	535	0	525	0	535	0	535	0	535	0	0	531.538	1.43051	0.3265	-32.4085	-31.5334	-24.0017	-31.1272	-22.6891	-23.0328	-19.4388	-29.0332	-29.377	-24.0329	-24.0642	-30.6271	-26.7805	1.25259
6.5423	0	520	0	530	0	525	0	535	0	535	0	535	0	535	0	535	0	525	0	535	0	535	0	535	0	0	531.538	1.43051	0.327	-32.4397	-31.4397	-23.5329	-30.0021	-23.4391	-23.9079	-20.5327	-28.1269	-29.6896	-23.4079	-24.4704	-29.127	-26.6763	1.11964
6.5524	0	520	0	530	0	525	0	535	0	535	0	535	0	535	0	535	0	525	0	535	0	535	0	535	0	0	531.538	1.43051	0.3275	-32.6272	-31.971	-23.5016	-31.971	-23.1266	-21.9078	-20.8139	-29.002	-31.4084	-26.1893	-23.9079	-30.1896	-27.218	1.27858
6.5624	0	520	0	530	0	525	0	535	0	535	0	535	0	535	0	535	0	525	0	535	0	535	0	535	0	0	531.538	1.43051	0.328	-31.9084	-31.2834	-23.3141	-32.6585	-22.7516	-23.4079	-20.3764	-29.377	-29.9396	-22.8453	-24.9705	-29.7833	-26.8847	1.24963
6.5724	0	520	0	530	0	525	0	535	0	535	0	535	0	535	0	535	0	525	0	535	0	535	0	535	0	0	531.538	1.43051	0.3285	-31.4709	-31.5334	-23.6891	-31.971	-21.939	-22.5641	-20.2827	-28.4395	-30.8459	-26.1268	-23.8767	-30.8771	-26.968	1.25839
6.5824	0	520	0	530	0	525	0	535	0	535	0	535	0	535	0	535	0	525	0	535	0	535	0	535	0	0	531.538	1.43051	0.329	-32.096	-31.0021	-23.9392	-32.6898	-23.3454	-23.5954	-20.3452	-28.7832	-30.1896	-24.3767	-23.7829	-31.0021	-27.0956	1.22924
6.5924	0	520	0	530	0	525	0	535	0	535	0	535	0	535	0	535	0	525	0	535	0	535	0	535	0	0	531.538	1.43051	0.3295	-32.2522	-31.2834	-23.6579	-30.6271	-22.7828	-23.3141	-20.2827	-29.3145	-28.9395	-24.6267	-24.4704	-29.8458	-26.7831	1.15285
6.6024	0	520	0	530	0	525	0	535	0	535	0	535	0	535	0	535	0	525	0	535	0	535	0	535	0	0	531.538	1.43051	0.33	-32.4085	-31.1897	-23.1891	-30.2521	-22.8453	-22.4391	-18.7513	-28.2832	-29.4708	-23.5329	-23.8141	-29.502	-26.3065	1.25656
6.6125	0	520	0	530	0	525	0	535	0	535	0	535	0	535	0	535	0	525	0	535	0	535	0	535	0	0	531.538	1.43051	0.3305	-32.1272	-31.5647	-23.2516	-30.5959	-22.6266	-24.1579	-20.0014	-30.1896	-30.0333	-24.0954	-23.2829	-30.4708	-26.8664	1.24241
6.6225	0	520	0	530	0	525	0	535	0	535	0	535	0	535	0	535	0	525	0	535	0	535	0	535	0	0	531.538	1.43051	0.331	-31.8459	-31.0959	-23.2829	-30.5959	-23.0953	-21.9703	-19.6576	-28.1895	-28.8457	-24.6892	-23.7829	-29.7833	-26.4029	1.18527
6.6325	0	520	0	530	0	525	0	535	0	535	0	535	0	535	0	535	0	525	0	535	0	535	0	535	0	0	531.538	1.43051	0.3315	-31.5647	-31.1272	-23.1266	-31.3772	-22.0953	-23.1891	-20.0014	-28.5957	-29.7521	-24.1892	-25.1892	-30.2521	-26.705	1.20108
6.6425	0	520	0	530	0	525	0	535	0	535	0	535	0	535	0	535	0	525	0	535	0	535	0	535	0	0	531.538	1.43051	0.332	-32.3772	-31.3772	-22.7516	-30.3146	-23.1266	-22.0015	-19.4076	-27.9394	-28.8145	-24.4704	-21.9703	-30.8146	-26.2805	1.28792
6.6525	0	520	0	530	0	525	0	535	0	535	0	535	0	535	0	535	0	525	0	535	0	535	0	535	0	0	531.538	1.43051	0.3325	-31.3772	-31.4084	-23.9704	-30.4708	-22.5016	-24.1892	-18.0637	-28.7832	-30.1896	-24.3454	-23.5954	-31.0021	-26.6581	1.27451
6.6626	0	520	0	530	0	525	0	535	0	535	0	535	0	535	0	535	0	525	0	535	0	535	0	535	0	0	531.538	1.43051	0.333	-32.1272	-31.4084	-23.1266	-29.6271	-21.814	-23.5329	-19.3763	-28.1582	-29.9396	-23.6891	-24.0017	-31.8459	-26.5539	1.27829
6.6726	0	520	0	530	0	525	0	535	0	535	0	535	0	535	0	535	0	525	0	535	0	535	0	535	0	0	531.538	1.43051	0.3335	-32.596	-31.5022	-23.2516	-31.0334	-22.5953	-21.9703	-20.0326	-28.8145	-29.5645	-24.8455	-21.939	-29.502	-26.4706	1.28561
6.6826	0	520	0	530	0	525	0	535	0	535	0	535	0	535	0	535	0	525	0	535	0	535	0	535	0	0	531.538	1.43051	0.334	-32.1272	-32.3772	-23.3766	-30.6271	-22.4391	-24.1579	-19.0951	-28.6582	-30.1896	-25.0955	-23.7516	-29.502	-26.7831	1.24819
6.6926	0	520	0	530	0	525	0	535	0	535	0	535	0	535	0	535	0	525	0	535	0	535	0	535	0	0	531.538	1.43051	0.3345	-32.4397	-31.6584	-23.6891	-30.6584	-22.3765	-21.7828	-18.5013	-28.1895	-29.8458	-24.2829	-23.7829	-29.8771	-26.4237	1.31426
6.7026	0	520	0	530	0	525	0	535	0	535	0	535	0	535	0	535	0	525	0	535	0	535	0	535	0	0	531.538	1.43051	0.335	-31.5647	-31.8147	-23.2203	-30.7521	-22.5016	-24.1579	-18.6575	-29.8458	-30.5646	-25.783	-23.8454	-29.6896	-26.8664	1.25996
6.7127	0	520	0	530	0	525	0	535	0	535	0	535	0	535	0	535	0	525	0	535	0	535	0	535	0	0	531.538	1.43051	0.3355	-32.3772	-31.0021	-23.7516	-30.6896	-22.8453	-23.0016	-19.9701	-28.627	-28.9082	-24.8767	-24.1267	-30.3771	-26.7128	1.17174
6.7227	0	520	0	530	0	525	0	535	0	535	0	535	0	535	0	535	0	525	0	535	0	535	0	535	0	0	531.538	1.43051	0.336	-32.1272	-31.5959	-23.1578	-29.6896	-22.2828	-23.5016	-18.7826	-28.6895	-29.3145	-23.8767	-23.6579	-29.9083	-26.382	1.24449
6.7327	0	520	0	530	0	525	0	535	0	535	0	535	0	535	0	535	0	525	0	535	0	535	0	535	0	0	531.538	1.43051	0.3365	-32.6585	-31.5022	-23.6266	-31.8459	-23.1891	-23.5329	-19.0951	-28.3145	-29.8771	-24.5329	-23.8141	-28.9395	-26.744	1.24742
6.7427	0	520	0	530	0	525	0	535	0	535	0	535	0	535	0	535	0	525	0	535	0	535	0	535	0	0	531.538	1.43051	0.337	-32.3772	-30.5959	-22.9078	-31.4709	-21.939	-22.8141	-19.0326	-27.8769	-31.2834	-24.2829	-23.5954	-30.7521	-26.5774	1.33491
6.7527	0	520	0	530	0	525	0	535	0	535	0	535	0	535	0	535	0	525	0	535	0	535	0	535	0	0	531.538	1.43051	0.3375	-31.9397	-30.6584	-23.6891	-29.502	-22.314	-22.4078	-17.7825	-28.9395	-29.9708	-24.3142	-24.9705	-31.4709	-26.4966	1.30234
6.7628	0	520	0	530	0	525	0	535	0	535	0	535	0	535	0	535	0	525	0	535	0	535	0	535	0	0	531.538	1.43051	0.338	-31.8772	-31.1897	-23.3454	-30.2521	-23.5016	-23.3141	-18.595	-29.002	-30.4083	-24.5329	-23.9392	-29.127	-26.5904	1.21646
6.7728	0	520	0	530	0	525	0	535	0	535	0	535	0	535	0	535	0	525	0	535	0	535	0	535	0	0	531.538	1.43051	0.3385	-31.2834	-30.8459	-23.1891	-29.0332	-21.6265	-22.9078	-18.345	-28.877	-29.4708	-27.0019	-24.8767	-29.6896	-26.4289	1.19905
6.7828	0	520	0	530	0	525	0	535	0	535	0	535	0	535	0	535	0	525	0	535	0	535	0	535	0	0	531.538	1.43051	0.339	-32.4397	-30.9084	-23.5954	-29.8146	-22.3765	-23.7829	-19.0638	-29.9708	-30.2521	-26.1893	-23.1578	-30.8771	-26.869	1.25751
6.7928	0	520	0	530	0	525	0	535	0	535	0	535	0	535	0	535	0	525	0	535	0	535	0	535	0	0	531.538	1.43051	0.3395	-31.3147	-31.1897	-23.1891	-30.1896	-22.1578	-22.8141	-17.8762	-29.0645	-29.9708	-25.3455	-25.283	-29.8458	-26.5201	1.25887
6.8028	0	520	0	530	0	525	0	535	0	535	0	535	0	535	0	535	0	525	0	535	0	535	0	535	0	0	531.538	1.43051	0.34	-31.9084	-31.0334	-23.5954	-31.2834	-20.4077	-22.9703	-17.9075	-27.5331	-29.9396	-24.8767	-24.1579	-29.1583	-26.231	1.325
6.8128	0	520	0	530	0	525	0	535	0	535	0	535	0	535	0	535	0	525	0	535	0	535	0	535	0	0	531.538	1.43051	0.3405	-31.3147	-31.3772	-23.3141	-32.596	-23.0641	-22.8766	-18.1262	-29.5333	-30.4708	-25.1892	-23.9392	-29.377	-26.7649	1.32005
6.8229	0	520	0	530	0	525	0	535	0	535	0	535	0	535	0	535	0	525	0	535	0	535	0	535	0	0	531.538	1.43051	0.341	-31.9397	-31.0959	-22.7516	-30.3146	-22.5953	-22.6578	-18.7513	-27.1269	-30.1583	-24.8455	-22.3453	-30.0646	-26.2206	1.27597
6.8329	0	520	0	530	0	525	0	535	0	535	0	535	0	535	0	535	0	525	0	535	0	535	0	535	0	0	531.538	1.43051	0.3415	-31.4709	-31.1897	-23.2516	-30.9709	-22.4391	-23.1891	-16.5636	-30.3771	-30.8146	-25.1892	-23.9392	-29.5958	-26.5826	1.3895
6.8429	0	520	0	530	0	525	0	535	0	535	0	535	0	535	0	535	0	525	0	535	0	535	0	535	0	0	531.538	1.43051	0.342	-31.7522	-30.9084	-23.3141	-31.7834	-22.4078	-23.7204	-16.8449	-27.9394	-30.4083	-24.0642	-24.0329	-31.1897	-26.5305	1.38751
6.8529	0	520	0	530	0	525	0	535	0	535	0	535	0	535	0	535	0	525	0	535	0	535	0	535	0	0	531.538	1.43051	0.3425	-32.096	-31.1897	-22.5016	-31.6584	-23.0016	-23.0953	-16.9699	-31.0334	-29.9708	-24.6579	-23.8454	-30.6271	-26.7206	1.43031
6.8629	0	520	0	530	0	525	0	535	0	535	0	535	0	535	0	535	0	525	0	535	0	535	0	535	0	0	531.538	1.43051	0.343	-31.9084	-30.6896	-23.0016	-32.0335	-22.9703	-22.8453	-16.5636	-27.3456	-30.4396	-25.0642	-24.0017	-31.0959	-26.4966	1.40311
6.873	0	520	0	530	0	525	0	535	0	535	0	535	0	535	0	535	0	525	0	535	0	535	0	535	0	0	531.538	1.43051	0.3435	-32.5335	-30.5334	-23.3141	-31.2834	-21.439	-22.6266	-15.5636	-29.6271	-29.9396	-24.4392	-24.0954	-30.0021	-26.2831	1.48033
6.883	0	520	0	530	0	525	0	535	0	535	0	535	0	535	0	535	0	525	0	535	0	535	0	535	0	0	531.538	1.43051	0.344	-31.7834	-31.0646	-23.3766	-31.3147	-21.9078	-23.1578	-15.5323	-28.4707	-29.1895	-25.6893	-23.9704	-29.4708	-26.244	1.40467
6.893	0	520	0	530	0	525	0	535	0	535	0	535	0	535	0	535	0	525	0	535	0	535	0	535	0	0	531.538	1.43051	0.3445	-31.8772	-30.9709	-22.7828	-30.4396	-21.9078	-24.1267	-15.001	-29.6271	-30.6271	-24.0954	-25.1892	-31.7834	-26.5357	1.50605
6.903	0	520	0	530	0	525	0	535	0	535	0	535	0	535	0	535	0	525	0	535	0	535	0	535	0	0	531.538	1.43051	0.345	-31.2834	-31.2522	-23.7516	-30.0333	-22.2828	-22.5016	-15.8448	-28.752	-29.0645	-24.4392	-22.8766	-30.8771	-26.0799	1.40041
6.913	0	520	0	530	0	525	0	535	0	535	0	535	0	535	0	535	0	525	0	535	0	535	0	535	0	0	531.538	1.43051	0.3455	-31.8772	-30.8459	-23.3766	-29.5958	-22.3765	-22.3453	-14.751	-29.0645	-29.252	-24.6892	-23.9392	-30.3458	-26.0383	1.44511
6.9231	0	520	0	530	0	525	0	535	0	535	0	535	0	535	0	535	0	525	0	535	0	535	0	535	0	0	531.538	1.43051	0.346	-31.2834	-30.8146	-23.0328	-30.9396	-23.0328	-23.1266	-13.7822	-28.6582	-30.6896	-25.0017	-24.6892	-30.5646	-26.3013	1.51296
6.9331	0	520	0	530	0	525	0	535	0	535	0	535	0	535	0	535	0	525	0	535	0	535	0	535	0	0	531.538	1.43051	0.3465	-32.0647	-30.7521	-23.8767	-31.0334	-23.0016	-23.3766	-13.7197	-27.8769	-31.0646	-25.5018	-25.283	-31.4397	-26.5826	1.53578
6.9431	0	520	0	530	0	525	0	535	0	535	0	535	0	535	0	535	0	525	0	535	0	535	0	535	0	0	531.538	1.43051	0.347	-31.8459	-31.1897	-23.4391	-30.6271	-21.564	-22.8141	-14.3447	-27.6894	-29.7521	-25.0017	-24.0017	-30.3146	-26.0487	1.4956
6.9531	0	520	0	530	0	525	0	535	0	535	0	535	0	535	0	535	0	525	0	535	0	535	0	535	0	0	531.538	1.43051	0.3475	-32.4085	-31.0334	-23.0953	-32.3772	-22.0015	-24.3454	-14.126	-29.0958	-30.7834	-24.0954	-24.1892	-31.7522	-26.6086	1.61255
6.9631	0	520	0	530	0	525	0	535	0	535	0	535	0	535	0	535	0	525	0	535	0	535	0	535	0	0	531.538	1.43051	0.348	-32.1272	-30.9396	-23.1891	-30.2833	-21.689	-22.6891	-12.8446	-28.502	-29.8146	-23.1266	-24.0954	-28.4395	-25.645	1.57618
6.9731	0	520	0	530	0	525	0	535	0	535	0	535	0	535	0	535	0	525	0	535	0	535	0	535	0	0	531.538	1.43051	0.3485	-31.8459	-31.4084	-23.1578	-31.9084	-22.1578	-22.6266	-14.4385	-28.8457	-31.5959	-25.8455	-23.4704	-29.7833	-26.4237	1.56723
6.9832	0	520	0	530	0	525	0	535	0	535	0	535	0	535	0	535	0	525	0	535	0	535	0	535	0	0	531.538	1.43051	0.349	-31.8772	-31.0021	-23.6266	-32.096	-22.0015	-23.7516	-12.3758	-29.0645	-30.3458	-26.1893	-24.0329	-30.4083	-26.3977	1.64854
6.9932	0	520	0	530	0	525	0	535	0	535	0	535	0	535	0	535	0	525	0	535	0	535	0	535	0	0	531.538	1.43051	0.3495	-32.096	-30.6896	-23.1891	-30.8146	-22.6578	-23.3141	-12.3133	-28.752	-30.5334	-23.2829	-24.1267	-30.1896	-25.9966	1.63418
7.0032	0	520	0	530	0	525	0	535	0	535	0	535	0	535	0	535	0	525	0	535	0	535	0	535	0	0	531.538	1.43051	0.35	-32.1272	-30.8146	-23.5329	-30.8146	-22.8141	-24.5954	-13.2822	-28.377	-30.3458	-25.783	-25.0642	-30.7834	-26.5279	1.52964
7.0132	0	520	0	530	0	525	0	535	0	535	0	535	0	535	0	535	0	525	0	535	0	535	0	535	0	0	531.538	1.43051	0.3505	-31.9084	-31.1272	-22.6578	-30.6896	-22.0953	-22.9078	-10.0007	-27.8769	-30.7209	-23.7204	-22.064	-29.7208	-25.4575	1.80898
7.0232	0	520	0	530	0	525	0	535	0	535	0	535	0	535	0	535	0	525	0	535	0	535	0	535	0	0	531.538	1.43051	0.351	-31.8459	-31.1272	-23.3454	-32.471	-22.8141	-22.3453	-11.032	-28.5332	-31.0021	-25.4393	-24.5017	-30.3771	-26.2362	1.76115
7.0333	0	520	0	530	0	525	0	535	0	535	0	535	0	535	0	535	0	525	0	535	0	535	0	535	0	0	531.538	1.43051	0.3515	-32.5335	-31.3459	-23.8141	-30.4708	-21.1577	-22.0015	-10.5007	-28.877	-30.1583	-25.0017	-24.4079	-31.1897	-25.9549	1.80845
7.0433	0	520	0	530	0	525	0	535	0	535	0	535	0	535	0	535	0	525	0	535	0	535	0	535	0	0	531.538	1.43051	0.352	-31.8459	-30.7834	-23.0953	-30.4083	-22.5641	-23.6579	-11.157	-28.9082	-31.0334	-24.9705	-21.8453	-28.0957	-25.6971	1.69209
7.0533	0	520	0	530	0	525	0	535	0	535	0	535	0	535	0	535	0	525	0	535	0	535	0	535	0	0	531.538	1.43051	0.3525	-31.5959	-31.1897	-23.4704	-29.6271	-22.189	-22.8766	-8.50059	-29.4708	-29.4395	-24.4392	-24.0954	-29.5645	-25.5382	1.84308
7.0633	0	520	0	530	0	525	0	535	0	535	0	535	0	535	0	535	0	525	0	535	0	535	0	535	0	0	531.538	1.43051	0.353	-31.5022	-30.8459	-23.0328	-29.6583	-21.2827	-23.3766	-9.4694	-27.7519	-30.1271	-24.4079	-24.5329	-30.4083	-25.533	1.78365
7.0733	0	520	0	530	0	525	0	535	0	535	0	535	0	535	0	535	0	525	0	535	0	535	0	535	0	0	531.538	1.43051	0.3535	-31.9084	-31.0646	-23.5954	-30.9084	-21.939	-22.3453	-8.90687	-28.6895	-31.8147	-24.7517	-24.3142	-29.7208	-25.8299	1.88976
7.0834	0	520	0	530	0	525	0	535	0	535	0	535	0	535	0	535	0	525	0	535	0	535	0	535	0	0	531.538	1.43051	0.354	-31.7834	-31.3459	-23.5641	-30.7834	-21.2827	-23.1578	-9.09438	-29.1895	-29.9708	-24.5642	-26.5643	-30.0958	-25.9497	1.85055
7.0934	0	520	0	530	0	525	0	535	0	535	0	535	0	535	0	535	0	525	0	535	0	535	0	535	0	0	531.538	1.43051	0.3545	-31.7522	-31.5959	-23.1891	-31.3147	-21.2827	-23.1578	-7.65678	-29.5958	-29.8771	-24.7205	-24.0017	-30.4396	-25.7153	1.98418
7.1034	0	520	0	530	0	525	0	535	0	535	0	535	0	535	0	535	0	525	0	535	0	535	0	535	0	0	531.538	1.43051	0.355	-31.7209	-31.1897	-22.6891	-32.1585	-21.564	-23.2516	-7.09424	-28.4395	-30.9084	-24.9392	-24.0017	-30.6896	-25.7205	2.04018
7.1134	0	520	0	530	0	525	0	535	0	535	0	535	0	535	0	535	0	525	0	535	0	535	0	535	0	0	531.538	1.43051	0.3555	-32.1897	-31.1897	-22.8766	-31.5959	-22.0953	-24.5017	-7.28175	-29.3145	-30.3771	-24.5642	-23.0953	-30.2833	-25.7804	2.00868
7.1234	0	520	0	530	0	525	0	535	0	535	0	535	0	535	0	535	0	525	0	535	0	535	0	535	0	0	531.538	1.43051	0.356	-32.5335	-31.3147	-23.4391	-30.4708	-21.7515	-22.9078	-5.18786	-28.1582	-29.6896	-25.4705	-24.4704	-30.6584	-25.5044	2.12823
7.1335	0	520	0	530	0	525	0	535	0	535	0	535	0	535	0	535	0	525	0	535	0	535	0	535	0	0	531.538	1.43051	0.3565	-31.7522	-31.0021	-23.3141	-30.0333	-21.5952	-23.0953	-5.37537	-28.877	-29.6583	-24.5329	-24.1267	-30.6896	-25.3377	2.0941
7.1435	0	520	0	530	0	525	0	535	0	535	0	535	0	535	0	535	0	525	0	535	0	535	0	535	0	0	531.538	1.43051	0.357	-31.7522	-31.4709	-23.0953	-31.6584	-20.2514	-24.7205	-4.78158	-28.627	-30.0646	-24.783	-23.8767	-28.8145	-25.3247	2.16767
7.1535	0	520	0	530	0	525	0	535	0	535	0	535	0	535	0	535	0	525	0	535	0	535	0	535	0	0	531.538	1.43051	0.3575	-31.5022	-30.8459	-22.314	-31.5334	-21.6578	-21.8453	-4.62532	-29.3145	-30.9084	-23.8454	-26.3456	-30.2521	-25.4158	2.21014
7.1635	0	520	0	530	0	525	0	535	0	535	0	535	0	535	0	535	0	525	0	535	0	535	0	535	0	0	531.538	1.43051	0.358	-31.7834	-31.1897	-22.8453	-30.6584	-22.2828	-23.5016	-1.56261	-29.3458	-30.5021	-24.6267	-24.3767	-29.0645	-25.145	2.3771
7.1735	0	520	0	530	0	525	0	535	0	535	0	535	0	535	0	535	0	525	0	535	0	535	0	535	0	0	531.538	1.43051	0.3585	-31.7834	-30.6271	-22.8766	-29.1583	-20.1889	-22.7203	-1.4376	-27.6269	-30.1583	-24.5642	-23.1266	-29.4083	-24.473	2.36182
7.1835	0	520	0	530	0	525	0	535	0	535	0	535	0	535	0	535	0	525	0	535	0	535	0	535	0	0	531.538	1.43051	0.359	-31.5022	-31.1897	-22.6578	-29.6896	-21.7828	-22.5016	-0.68755	-29.3145	-30.0333	-25.0017	-24.9392	-30.7209	-25.0017	2.45017
7.1936	0	520	0	530	0	525	0	535	0	535	0	535	0	535	0	535	0	525	0	535	0	535	0	535	0	0	531.538	1.43051	0.3595	-31.4397	-30.6271	-22.7828	-30.9084	-21.4702	-22.6891	-1.00007	-27.6269	-30.3458	-23.6266	-23.1266	-31.4709	-24.7595	2.44455
7.2036	0	520	0	530	0	525	0	535	0	535	0	535	0	535	0	535	0	525	0	535	0	535	0	535	0	0	531.538	1.43051	0.36	-32.0022	-30.8146	-23.0016	-29.8146	-22.0953	-21.3452	0.18751	-28.8145	-30.2521	-24.1892	-24.0954	-30.9396	-24.7647	2.52929
7.2136	0	520	0	530	0	525	0	535	0	535	0	535	0	535	0	535	0	525	0	535	0	535	0	535	0	0	531.538	1.43051	0.3605	-31.7834	-31.4397	-22.6891	-31.1897	-22.2828	-24.1892	1.71887	-28.1582	-30.0021	-26.2831	-24.0954	-29.9708	-25.0304	2.63317
7.2236	0	520	0	530	0	525	0	535	0	535	0	535	0	535	0	535	0	525	0	535	0	535	0	535	0	0	531.538	1.43051	0.361	-31.0646	-31.1584	-22.3453	-29.4708	-21.8453	-21.5015	2.31266	-29.4708	-30.1583	-25.158	-26.1893	-30.6584	-24.7257	2.6814
7.2336	0	520	0	530	0	525	0	535	0	535	0	535	0	535	0	535	0	525	0	535	0	535	0	535	0	0	531.538	1.43051	0.3615	-32.0022	-31.0646	-22.6578	-32.6272	-22.5953	-24.4079	3.53149	-28.0332	-29.8146	-25.3455	-23.1891	-31.7209	-24.9939	2.82119
7.2437	0	520	0	530	0	525	0	535	0	535	0	535	0	535	0	535	0	525	0	535	0	535	0	535	0	0	531.538	1.43051	0.362	-31.5647	-30.8771	-22.6891	-31.5647	-21.6265	-22.6266	5.46913	-29.0958	-30.2833	-25.1892	-23.7829	-30.3458	-24.5147	2.94316
7.2537	0	520	0	530	0	525	0	535	0	535	0	535	0	535	0	535	0	525	0	535	0	535	0	535	0	0	531.538	1.43051	0.3625	-31.4397	-31.0021	-22.7828	-31.4709	-21.5015	-23.8454	7.28175	-28.0957	-29.5958	-25.158	-24.2829	-30.1583	-24.3376	3.05574
7.2637	0	520	0	530	0	525	0	535	0	535	0	535	0	535	0	535	0	525	0	535	0	535	0	535	0	0	531.538	1.43051	0.363	-31.7834	-30.5646	-22.8141	-31.7209	-22.2828	-24.1267	8.34433	-28.877	-28.7832	-25.158	-23.1578	-31.4709	-24.3663	3.15836
7.2737	0	520	0	530	0	525	0	535	0	535	0	535	0	535	0	535	0	525	0	535	0	535	0	535	0	0	531.538	1.43051	0.3635	-31.971	-31.2834	-23.0328	-31.5647	-23.0016	-22.314	9.56316	-28.1582	-30.0333	-25.6268	-24.3454	-30.3458	-24.3428	3.25714
7.2837	0	520	0	530	0	525	0	535	0	535	0	535	0	535	0	535	0	525	0	535	0	535	0	535	0	0	531.538	1.43051	0.364	-31.5022	-31.1272	-23.4079	-31.1897	-21.1577	-23.8454	12.1883	-28.0957	-30.7521	-25.2517	-23.6266	-30.5959	-24.0303	3.46452
7.2938	0	520	0	530	0	525	0	535	0	535	0	535	0	535	0	535	0	525	0	535	0	535	0	535	0	0	531.538	1.43051	0.3645	-31.0959	-31.1897	-23.0016	-30.9396	-21.0639	-22.9391	13.3759	-30.0021	-30.9396	-24.9705	-24.4392	-30.0021	-23.9339	3.56667
7.3038	0	520	0	530	0	525	0	535	0	535	0	535	0	535	0	535	0	525	0	535	0	535	0	535	0	0	531.538	1.43051	0.365	-30.7834	-31.3147	-23.5329	-30.6896	-21.939	-21.4077	14.876	-27.3144	-30.8146	-23.5329	-23.9392	-30.6896	-23.4235	3.65688
7.3138	0	520	0	530	0	525	0	535	0	535	0	535	0	535	0	535	0	525	0	535	0	535	0	535	0	0	531.538	1.43051	0.3655	-31.5022	-30.9084	-23.4391	-31.5647	-20.5952	-22.6578	17.0324	-29.6271	-29.4083	-25.3455	-24.0642	-31.3459	-23.6188	3.86667
7.3238	0	520	0	530	0	525	0	535	0	535	0	535	0	535	0	535	0	525	0	535	0	535	0	535	0	0	531.538	1.43051	0.366	-30.8459	-31.1272	-23.4391	-30.3458	-22.064	-22.6891	17.97	-26.8456	-30.0646	-24.4079	-24.1892	-31.2522	-23.275	3.88915
7.3338	0	520	0	530	0	525	0	535	0	535	0	535	0	535	0	535	0	525	0	535	0	535	0	535	0	0	531.538	1.43051	0.3665	-31.0334	-30.8771	-23.5641	-30.1896	-22.1265	-23.0016	19.5951	-30.3146	-29.0332	-25.3455	-24.9705	-31.971	-23.5693	4.05415
7.3438	0	520	0	530	0	525	0	535	0	535	0	535	0	535	0	535	0	525	0	535	0	535	0	535	0	0	531.538	1.43051	0.367	-31.7522	-31.1584	-22.7516	-32.0335	-21.8765	-23.0641	18.7826	-27.5019	-31.0021	-24.8142	-24.5329	-30.9396	-23.5537	4.00868
7.3539	0	520	0	530	0	525	0	535	0	535	0	535	0	535	0	535	0	525	0	535	0	535	0	535	0	0	531.538	1.43051	0.3675	-30.5021	-31.1897	-23.6266	-31.0334	-22.6578	-23.0016	19.9389	-28.9395	-30.7834	-25.1892	-24.0642	-30.1583	-23.4339	4.0666
7.3639	0	520	0	530	0	525	0	535	0	535	0	535	0	535	0	535	0	525	0	535	0	535	0	535	0	0	531.538	1.43051	0.368	-30.6584	-31.3772	-23.1266	-30.5021	-21.5327	-22.064	21.0014	-28.6895	-30.3771	-25.5018	-23.6266	-30.8459	-23.1084	4.15526
7.3739	0	520	0	530	0	525	0	535	0	535	0	535	0	535	0	535	0	525	0	535	0	535	0	535	0	0	531.538	1.43051	0.3685	-31.1897	-31.5334	-23.7829	-32.096	-21.3765	-23.1891	20.1889	-28.1895	-30.5334	-24.1267	-23.8767	-31.4397	-23.4287	4.12488
7.3839	0	520	0	530	0	525	0	535	0	535	0	535	0	535	0	535	0	525	0	535	0	535	0	535	0	0	531.538	1.43051	0.369	-31.0646	-31.1272	-22.8141	-30.7521	-22.0328	-23.5329	20.9389	-29.5958	-30.1583	-24.0954	-24.1892	-31.0646	-23.2907	4.1601
7.3939	0	520	0	530	0	525	0	535	0	535	0	535	0	535	0	535	0	525	0	535	0	535	0	535	0	0	531.538	1.43051	0.3695	-31.6272	-31.0334	-23.3454	-30.7834	-20.8139	-23.0641	19.3451	-27.2831	-29.7521	-24.3767	-24.2829	-31.8459	-23.2386	4.02887
7.404	0	520	0	530	0	525	0	535	0	535	0	535	0	535	0	535	0	525	0	535	0	535	0	535	0	0	531.538	1.43051	0.37	-31.6584	-31.5022	-23.3141	-31.5022	-21.1265	-22.1578	20.0639	-30.2833	-29.252	-23.6579	-24.908	-28.4395	-23.1448	4.0861
7.414	0	520	0	530	0	525	0	535	0	535	0	535	0	535	0	535	0	525	0	535	0	535	0	535	0	0	531.538	1.43051	0.3705	-31.0334	-31.4709	-23.3141	-30.7834	-21.6578	-22.6891	19.1888	-28.8145	-29.9708	-25.5955	-25.7518	-31.0959	-23.5824	4.02356
7.424	0	520	0	530	0	525	0	535	0	535	0	535	0	535	0	535	0	525	0	535	0	535	0	535	0	0	531.538	1.43051	0.371	-30.6584	-31.1897	-24.0017	-31.7209	-21.0639	-23.0641	18.5638	-29.502	-30.8771	-25.8768	-25.0017	-31.1897	-23.7985	3.99821
7.434	0	520	0	530	0	525	0	535	0	535	0	535	0	535	0	535	0	525	0	535	0	535	0	535	0	0	531.538	1.43051	0.3715	-31.1897	-31.3459	-23.1891	-31.5334	-21.4077	-23.6266	17.595	-28.4395	-30.4396	-25.658	-24.3454	-32.0647	-23.8037	3.92031
7.444	0	520	0	530	0	525	0	535	0	535	0	535	0	535	0	535	0	525	0	535	0	535	0	535	0	0	531.538	1.43051	0.372	-31.2834	-31.1897	-23.1578	-30.9084	-21.6578	-22.1265	16.2824	-27.6894	-30.3458	-24.3767	-25.3768	-30.6271	-23.5381	3.77604
7.4541	0	520	0	530	0	525	0	535	0	535	0	535	0	535	0	535	0	525	0	535	0	535	0	535	0	0	531.538	1.43051	0.3725	-31.5022	-31.1897	-22.9391	-30.5334	-20.9077	-22.6578	16.0011	-28.627	-30.0333	-25.0955	-23.9079	-30.6896	-23.5068	3.75791
7.4641	0	520	0	530	0	525	0	535	0	535	0	535	0	535	0	535	0	525	0	535	0	535	0	535	0	0	531.538	1.43051	0.373	-30.9396	-31.3772	-23.1578	-30.2833	-21.189	-22.6266	14.3135	-29.3145	-30.4708	-24.4392	-24.3454	-30.1896	-23.6683	3.61803
7.4741	0	520	0	530	0	525	0	535	0	535	0	535	0	535	0	535	0	525	0	535	0	535	0	535	0	0	531.538	1.43051	0.3735	-30.7521	-31.0334	-23.3141	-30.9396	-20.4389	-22.4078	15.3448	-29.5958	-30.7834	-25.3143	-24.4392	-32.1585	-23.8194	3.74604
7.4841	0	520	0	530	0	525	0	535	0	535	0	535	0	535	0	535	0	525	0	535	0	535	0	535	0	0	531.538	1.43051	0.374	-30.4396	-31.5022	-23.1891	-31.0959	-21.7828	-23.6891	13.9072	-29.1583	-29.0958	-25.4705	-23.5641	-30.5021	-23.7985	3.57543
7.4941	0	520	0	530	0	525	0	535	0	535	0	535	0	535	0	535	0	525	0	535	0	535	0	535	0	0	531.538	1.43051	0.3745	-31.6897	-31.1584	-23.3141	-31.3772	-21.1265	-22.4391	12.4384	-28.752	-30.4396	-24.6892	-24.4392	-30.3146	-23.9418	3.49053
7.5041	0	520	0	530	0	525	0	535	0	535	0	535	0	535	0	535	0	525	0	535	0	535	0	535	0	0	531.538	1.43051	0.375	-31.1272	-30.7209	-23.0953	-31.0334	-21.0327	-22.8141	13.0946	-29.0645	-29.502	-25.658	-24.0017	-29.9083	-23.7386	3.5089
7.5142	0	520	0	530	0	525	0	535	0	535	0	535	0	535	0	535	0	525	0	535	0	535	0	535	0	0	531.538	1.43051	0.3755	-31.1272	-31.1584	-23.4079	-30.4083	-21.0639	-22.5328	12.2508	-28.752	-30.4708	-24.9705	-24.3767	-30.4083	-23.8688	3.45397
7.5242	0	520	0	530	0	525	0	535	0	535	0	535	0	535	0	535	0	525	0	535	0	535	0	535	0	0	531.538	1.43051	0.376	-31.2834	-30.9396	-22.7828	-29.9083	-21.189	-23.0328	10.1257	-28.1895	-28.7832	-24.5954	-24.5329	-30.7209	-23.8194	3.25302
7.5342	0	520	0	530	0	525	0	535	0	535	0	535	0	535	0	535	0	525	0	535	0	535	0	535	0	0	531.538	1.43051	0.3765	-30.8459	-31.6272	-23.0016	-30.6896	-21.189	-23.1891	10.7195	-28.877	-31.1897	-24.8142	-24.0642	-29.0645	-23.986	3.33324
7.5442	0	520	0	530	0	525	0	535	0	535	0	535	0	535	0	535	0	525	0	535	0	535	0	535	0	0	531.538	1.43051	0.377	-31.1272	-31.1272	-22.9391	-32.1897	-21.0639	-22.9703	9.25064	-28.0957	-31.3459	-24.4704	-24.3454	-31.971	-24.3663	3.27766
7.5542	0	520	0	530	0	525	0	535	0	535	0	535	0	535	0	535	0	525	0	535	0	535	0	535	0	0	531.538	1.43051	0.3775	-31.6584	-31.0334	-23.3454	-29.8146	-21.0639	-23.4079	8.6881	-28.877	-30.3146	-24.7517	-24.0954	-30.4396	-24.1761	3.16846
7.5643	0	520	0	530	0	525	0	535	0	535	0	535	0	535	0	535	0	525	0	535	0	535	0	535	0	0	531.538	1.43051	0.378	-31.8772	-31.5647	-23.1891	-29.8771	-21.189	-22.8766	7.40676	-28.0332	-30.6584	-25.3768	-23.9079	-32.5647	-24.4756	3.11784
7.5743	0	520	0	530	0	525	0	535	0	535	0	535	0	535	0	535	0	525	0	535	0	535	0	535	0	0	531.538	1.43051	0.3785	-31.0646	-31.1272	-23.4079	-31.0021	-21.6578	-22.4391	7.03174	-27.8457	-30.2833	-24.1892	-24.4704	-32.5335	-24.4157	3.07267
7.5843	0	520	0	530	0	525	0	535	0	535	0	535	0	535	0	535	0	525	0	535	0	535	0	535	0	0	531.538	1.43051	0.379	-31.0646	-31.3459	-23.2516	-29.3145	-20.7202	-22.7828	5.65664	-28.0019	-30.4396	-24.6579	-24.2829	-30.1896	-24.1996	2.91322
7.5943	0	520	0	530	0	525	0	535	0	535	0	535	0	535	0	535	0	525	0	535	0	535	0	535	0	0	531.538	1.43051	0.3795	-30.6896	-30.9084	-23.1891	-30.5646	-20.1576	-22.1265	3.71901	-27.3456	-29.4395	-25.7518	-23.1891	-30.7834	-24.2022	2.77007
7.6043	0	520	0	530	0	525	0	535	0	535	0	535	0	535	0	535	0	525	0	535	0	535	0	535	0	0	531.538	1.43051	0.38	-30.5021	-30.8146	-23.9079	-30.3458	-21.0639	-22.9391	3.06271	-28.3457	-30.4396	-24.783	-23.9392	-31.4084	-24.6189	2.72807
7.6144	0	520	0	530	0	525	0	535	0	535	0	535	0	535	0	535	0	525	0	535	0	535	0	535	0	0	531.538	1.43051	0.3805	-31.0021	-31.0959	-23.3766	-31.3459	-20.9077	-22.9391	1.31259	-26.9706	-30.5646	-24.2829	-24.4392	-30.9396	-24.7126	2.6103
7.6244	0	520	0	530	0	525	0	535	0	535	0	535	0	535	0	535	0	525	0	535	0	535	0	535	0	0	531.538	1.43051	0.381	-30.7834	-30.4708	-23.5641	-30.6896	-21.189	-22.4703	-0.0625	-28.502	-30.5334	-25.283	-24.6579	-29.7521	-24.8298	2.47093
7.6344	0	520	0	530	0	525	0	535	0	535	0	535	0	535	0	535	0	525	0	535	0	535	0	535	0	0	531.538	1.43051	0.3815	-30.5959	-30.9709	-23.3454	-31.1272	-20.7514	-23.0641	-2.1564	-27.5019	-30.5646	-25.3143	-24.3454	-33.3773	-25.2596	2.39633
7.6444	0	520	0	530	0	525	0	535	0	535	0	535	0	535	0	535	0	525	0	535	0	535	0	535	0	0	531.538	1.43051	0.382	-30.2833	-31.4084	-22.6891	-31.7834	-22.0328	-23.4079	-1.84388	-29.6896	-29.3458	-24.4392	-23.8454	-30.9084	-25.1398	2.37583
7.6544	0	520	0	530	0	525	0	535	0	535	0	535	0	535	0	535	0	525	0	535	0	535	0	535	0	0	531.538	1.43051	0.3825	-30.1583	-31.1584	-22.8766	-32.0335	-21.2827	-23.6579	-4.59407	-28.0019	-30.0646	-24.5017	-23.8767	-31.1897	-25.283	2.17433
7.6645	0	520	0	530	0	525	0	535	0	535	0	535	0	535	0	535	0	525	0	535	0	535	0	535	0	0	531.538	1.43051	0.383	-30.9709	-31.0334	-23.0953	-32.1585	-21.5327	-22.0953	-5.62539	-28.1895	-29.4083	-25.1892	-23.9079	-31.0334	-25.3533	2.11147
7.6745	0	520	0	530	0	525	0	535	0	535	0	535	0	535	0	535	0	525	0	535	0	535	0	535	0	0	531.538	1.43051	0.3835	-30.4396	-31.3147	-22.9078	-31.7522	-21.5327	-24.0954	-5.7504	-27.9394	-31.0959	-24.5642	-23.5329	-29.8458	-25.3976	2.08266
7.6845	0	520	0	530	0	525	0	535	0	535	0	535	0	535	0	535	0	525	0	535	0	535	0	535	0	0	531.538	1.43051	0.384	-30.8146	-31.6584	-23.2516	-30.8146	-20.0326	-22.9703	-8.53184	-29.002	-31.0646	-25.0017	-23.8141	-30.0333	-25.5825	1.92761
7.6945	0	520	0	530	0	525	0	535	0	535	0	535	0	535	0	535	0	525	0	535	0	535	0	535	0	0	531.538	1.43051	0.3845	-31.1584	-30.9709	-23.2829	-30.4396	-20.9389	-22.0328	-9.56316	-28.0019	-30.3458	-25.0955	-24.6892	-29.8771	-25.533	1.80021
7.7045	0	520	0	530	0	525	0	535	0	535	0	535	0	535	0	535	0	525	0	535	0	535	0	535	0	0	531.538	1.43051	0.385	-30.3146	-31.3459	-22.7828	-30.2833	-21.4077	-23.5016	-10.7507	-28.3145	-29.8458	-23.8454	-24.1579	-29.6896	-25.52	1.68503
7.7145	0	520	0	530	0	525	0	535	0	535	0	535	0	535	0	535	0	525	0	535	0	535	0	535	0	0	531.538	1.43051	0.3855	-30.0646	-31.1897	-22.7516	-30.7209	-20.5952	-22.189	-12.8134	-27.8457	-29.4083	-24.5329	-23.8767	-30.8771	-25.5721	1.59827
7.7246	0	520	0	530	0	525	0	535	0	535	0	535	0	535	0	535	0	525	0	535	0	535	0	535	0	0	531.538	1.43051	0.386	-31.0334	-31.1897	-23.0641	-29.002	-21.189	-22.5641	-13.3447	-29.127	-30.1896	-24.8455	-24.0329	-30.9084	-25.8742	1.56051
7.7346	0	520	0	530	0	525	0	535	0	535	0	535	0	535	0	535	0	525	0	535	0	535	0	535	0	0	531.538	1.43051	0.3865	-30.7834	-31.2522	-22.6266	-31.0959	-20.4077	-23.4704	-14.1572	-27.7519	-30.6896	-24.7205	-24.8455	-29.502	-25.9419	1.52254
7.7446	0	520	0	530	0	525	0	535	0	535	0	535	0	535	0	535	0	525	0	535	0	535	0	535	0	0	531.538	1.43051	0.387	-30.5646	-30.8459	-22.7203	-31.9084	-21.1265	-21.6578	-15.7511	-28.1582	-31.4084	-24.5329	-22.5953	-30.4396	-25.9758	1.52004
7.7546	0	520	0	530	0	525	0	535	0	535	0	535	0	535	0	535	0	525	0	535	0	535	0	535	0	0	531.538	1.43051	0.3875	-30.2521	-30.4396	-23.3766	-31.3147	-20.0014	-24.0954	-17.1574	-28.6582	-30.0646	-25.4393	-23.9392	-30.3146	-26.2544	1.33912
7.7646	0	520	0	530	0	525	0	535	0	535	0	535	0	535	0	535	0	525	0	535	0	535	0	535	0	0	531.538	1.43051	0.388	-30.5021	-30.6584	-23.1578	-30.1896	-20.7514	-21.314	-16.8449	-28.3457	-29.7521	-25.158	-24.5017	-29.8146	-25.9159	1.34255
7.7747	0	520	0	530	0	525	0	535	0	535	0	535	0	535	0	535	0	525	0	535	0	535	0	535	0	0	531.538	1.43051	0.3885	-30.5021	-31.0646	-23.1891	-31.5959	-21.2827	-25.0017	-18.4388	-28.8457	-30.3146	-25.6268	-22.7516	-28.8145	-26.4523	1.25658
7.7847	0	520	0	530	0	525	0	535	0	535	0	535	0	535	0	535	0	525	0	535	0	535	0	535	0	0	531.538	1.43051	0.389	-30.8771	-31.3147	-23.1578	-32.346	-21.2827	-21.7828	-19.3763	-28.0019	-30.9084	-25.0017	-23.8767	-30.3146	-26.5201	1.32935
7.7947	0	520	0	530	0	525	0	535	0	535	0	535	0	535	0	535	0	525	0	535	0	535	0	535	0	0	531.538	1.43051	0.3895	-31.3459	-30.9396	-23.1266	-30.2521	-20.3764	-23.0016	-17.6575	-28.1895	-30.6271	-24.783	-23.8141	-29.7833	-26.1581	1.33713
7.8047	0	520	0	530	0	525	0	535	0	535	0	535	0	535	0	535	0	525	0	535	0	535	0	535	0	0	531.538	1.43051	0.39	-31.1272	-31.0646	-22.7203	-33.5336	-20.9077	-24.8142	-19.9701	-29.3458	-29.7833	-24.9705	-24.1267	-29.8146	-26.8482	1.28847
7.8147	0	520	0	530	0	525	0	535	0	535	0	535	0	535	0	535	0	525	0	535	0	535	0	535	0	0	531.538	1.43051	0.3905	-30.8771	-30.9396	-23.0328	-31.3772	-20.8452	-22.314	-20.0326	-26.8769	-30.0958	-24.5954	-22.9703	-29.9708	-26.1607	1.24872
7.8248	0	520	0	530	0	525	0	535	0	535	0	535	0	535	0	535	0	525	0	535	0	535	0	535	0	0	531.538	1.43051	0.391	-31.0646	-30.5334	-23.1891	-31.3772	-20.5952	-23.7204	-20.8452	-29.3458	-30.2833	-24.4704	-23.9079	-30.1896	-26.6268	1.20947
7.8348	0	520	0	530	0	525	0	535	0	535	0	535	0	535	0	535	0	525	0	535	0	535	0	535	0	0	531.538	1.43051	0.3915	-30.9709	-30.8771	-23.1891	-31.5334	-21.0014	-21.0639	-20.9389	-27.6582	-31.2522	-24.1267	-24.0329	-30.4708	-26.4263	1.28364
7.8448	0	520	0	530	0	525	0	535	0	535	0	535	0	535	0	535	0	525	0	535	0	535	0	535	0	0	531.538	1.43051	0.392	-31.0959	-31.2209	-22.8453	-31.4397	-21.6578	-24.5017	-21.8453	-29.1895	-30.0021	-23.8141	-23.3454	-30.0646	-26.7518	1.16412
7.8548	0	520	0	530	0	525	0	535	0	535	0	535	0	535	0	535	0	525	0	535	0	535	0	535	0	0	531.538	1.43051	0.3925	-30.8771	-31.4397	-23.0641	-30.2521	-21.189	-22.8141	-21.189	-26.8144	-30.1271	-25.9393	-25.5018	-29.5958	-26.5669	1.11307
7.8648	0	520	0	530	0	525	0	535	0	535	0	535	0	535	0	535	0	525	0	535	0	535	0	535	0	0	531.538	1.43051	0.393	-30.8146	-31.1897	-23.3766	-29.7208	-21.314	-23.2516	-20.9077	-30.1583	-30.9709	-24.1267	-24.5017	-30.4083	-26.7284	1.19058
7.8748	0	520	0	530	0	525	0	535	0	535	0	535	0	535	0	535	0	525	0	535	0	535	0	535	0	0	531.538	1.43051	0.3935	-31.3147	-31.3772	-23.4079	-31.6897	-20.8764	-23.0328	-22.8766	-27.5644	-30.5646	-26.2206	-23.5329	-31.7522	-27.0175	1.20336
7.8849	0	520	0	530	0	525	0	535	0	535	0	535	0	535	0	535	0	525	0	535	0	535	0	535	0	0	531.538	1.43051	0.394	-30.8771	-31.1584	-24.1892	-31.2522	-20.5639	-22.6578	-21.9078	-29.3458	-32.346	-23.6891	-23.8767	-30.2833	-26.8456	1.26074
7.8949	0	520	0	530	0	525	0	535	0	535	0	535	0	535	0	535	0	525	0	535	0	535	0	535	0	0	531.538	1.43051	0.3945	-30.8459	-30.8771	-23.3766	-30.7521	-20.4389	-23.1891	-21.5015	-27.5331	-30.8459	-25.4393	-23.9392	-29.9708	-26.5591	1.16192
7.9049	0	520	0	530	0	525	0	535	0	535	0	535	0	535	0	535	0	525	0	535	0	535	0	535	0	0	531.538	1.43051	0.395	-30.5959	-31.5959	-23.5641	-30.8459	-20.8764	-22.1578	-21.2515	-28.1582	-31.2834	-25.5643	-24.1267	-31.0021	-26.7518	1.23068
7.9149	0	520	0	530	0	525	0	535	0	535	0	535	0	535	0	535	0	525	0	535	0	535	0	535	0	0	531.538	1.43051	0.3955	-30.5334	-31.3147	-23.4391	-30.8459	-21.3765	-22.8453	-22.7828	-29.0332	-30.8146	-24.5017	-23.5641	-30.3458	-26.7831	1.14351
7.9249	0	520	0	530	0	525	0	535	0	535	0	535	0	535	0	535	0	525	0	535	0	535	0	535	0	0	531.538	1.43051	0.396	-30.7834	-31.1584	-24.0954	-31.3772	-21.2827	-23.5329	-22.8453	-26.6581	-30.6896	-24.7205	-23.3766	-31.3459	-26.8222	1.14062
7.935	0	520	0	530	0	525	0	535	0	535	0	535	0	535	0	535	0	525	0	535	0	535	0	535	0	0	531.538	1.43051	0.3965	-31.1272	-30.8771	-23.3766	-31.6584	-21.0639	-22.3453	-21.8453	-29.3145	-30.0646	-25.3143	-23.6891	-30.1896	-26.7388	1.1943
7.945	0	520	0	530	0	525	0	535	0	535	0	535	0	535	0	535	0	525	0	535	0	535	0	535	0	0	531.538	1.43051	0.397	-30.6271	-31.1272	-23.7516	-31.8772	-21.314	-23.1891	-23.0016	-28.6895	-30.6271	-24.5642	-23.9079	-29.4083	-26.8404	1.11589
7.955	0	520	0	530	0	525	0	535	0	535	0	535	0	535	0	535	0	525	0	535	0	535	0	535	0	0	531.538	1.43051	0.3975	-30.5646	-30.9396	-23.7516	-30.9084	-20.3139	-22.8141	-22.4078	-28.1582	-30.5334	-25.0642	-24.6267	-30.4083	-26.7076	1.13873
7.965	0	520	0	530	0	525	0	535	0	535	0	535	0	535	0	535	0	525	0	535	0	535	0	535	0	0	531.538	1.43051	0.398	-31.3147	-30.6271	-23.4079	-31.7834	-20.0014	-23.3141	-23.5329	-29.1583	-30.6896	-24.9705	-24.0329	-31.5959	-27.0357	1.2137
7.975	0	520	0	530	0	525	0	535	0	535	0	535	0	535	0	535	0	525	0	535	0	535	0	535	0	0	531.538	1.43051	0.3985	-31.4397	-31.5334	-23.6579	-29.7833	-20.6577	-22.2828	-22.5953	-27.7207	-30.3458	-24.4079	-23.8454	-28.252	-26.3768	1.1226
7.9851	0	520	0	530	0	525	0	535	0	535	0	535	0	535	0	535	0	525	0	535	0	535	0	535	0	0	531.538	1.43051	0.399	-30.6584	-31.0959	-23.5641	-28.4395	-21.314	-22.3765	-23.2829	-29.2833	-31.0334	-23.9392	-24.0017	-30.7834	-26.6477	1.11541
7.9951	0	520	0	530	0	525	0	535	0	535	0	535	0	535	0	535	0	525	0	535	0	535	0	535	0	0	531.538	1.43051	0.3995	-31.3772	-30.9709	-23.5329	-29.9396	-20.8452	-22.8766	-22.9078	-28.2207	-31.3147	-25.408	-22.4703	-28.4707	-26.5279	1.1344
8.0051	0	520	0	530	0	525	0	535	0	535	0	535	0	535	0	535	0	525	0	535	0	535	0	535	0	0	531.538	1.43051	0.4	-31.0959	-31.1272	-23.4704	-31.0021	-21.1265	-22.9703	-21.939	-28.0332	-30.5334	-24.1892	-24.0329	-31.4709	-26.7492	1.19382
8.0151	0	520	0	530	0	525	0	535	0	535	0	535	0	535	0	535	0	525	0	535	0	535	0	535	0	0	531.538	1.43051	0.4005	-31.3459	-30.7209	-23.5641	-29.5645	-21.314	-23.0953	-24.5017	-28.377	-29.8458	-24.7517	-23.9392	-30.4708	-26.7909	1.03306
8.0251	0	520	0	530	0	525	0	535	0	535	0	535	0	535	0	535	0	525	0	535	0	535	0	535	0	0	531.538	1.43051	0.401	-31.1584	-31.0646	-23.5954	-29.8771	-20.9702	-22.5953	-23.3141	-28.0019	-30.7521	-25.5955	-24.4079	-30.5334	-26.8222	1.0972
8.0352	0	520	0	530	0	525	0	535	0	535	0	535	0	535	0	535	0	525	0	535	0	535	0	535	0	0	531.538	1.43051	0.4015	-31.5647	-31.0334	-24.0642	-29.4395	-20.7827	-22.0015	-22.9703	-28.4707	-30.4708	-24.1892	-22.3765	-30.8146	-26.5149	1.1895
8.0452	0	520	0	530	0	525	0	535	0	535	0	535	0	535	0	535	0	525	0	535	0	535	0	535	0	0	531.538	1.43051	0.402	-31.5022	-31.1584	-23.5329	-30.9709	-18.8763	-22.5016	-22.064	-27.4081	-29.4083	-25.2205	-23.3766	-30.4708	-26.3742	1.24789
8.0552	0	520	0	530	0	525	0	535	0	535	0	535	0	535	0	535	0	525	0	535	0	535	0	535	0	0	531.538	1.43051	0.4025	-31.0959	-31.3772	-23.5329	-31.3147	-20.8452	-22.5328	-21.6578	-29.502	-31.1584	-25.283	-24.1267	-30.5334	-26.9133	1.23123
8.0652	0	520	0	530	0	525	0	535	0	535	0	535	0	535	0	535	0	525	0	535	0	535	0	535	0	0	531.538	1.43051	0.403	-31.7522	-30.6584	-24.0017	-30.8771	-20.1576	-22.9391	-23.4079	-28.4082	-30.8771	-25.1892	-23.6579	-32.5335	-27.0383	1.22557
8.0752	0	520	0	530	0	525	0	535	0	535	0	535	0	535	0	535	0	525	0	535	0	535	0	535	0	0	531.538	1.43051	0.4035	-32.096	-31.0959	-23.6891	-30.8771	-21.1577	-23.1578	-22.5641	-28.6895	-30.4708	-24.1267	-25.3143	-28.9707	-26.8508	1.12454
8.0852	0	520	0	530	0	525	0	535	0	535	0	535	0	535	0	535	0	525	0	535	0	535	0	535	0	0	531.538	1.43051	0.404	-31.0021	-30.4708	-23.3454	-30.0646	-20.0014	-23.3454	-23.5016	-28.5332	-31.2834	-24.1579	-24.0642	-31.4084	-26.7649	1.17278
8.0953	0	520	0	530	0	525	0	535	0	535	0	535	0	535	0	535	0	525	0	535	0	535	0	535	0	0	531.538	1.43051	0.4045	-32.0335	-31.2522	-23.9392	-30.4396	-19.4388	-23.0328	-22.9391	-28.5332	-29.4708	-24.4079	-23.9392	-30.5021	-26.6607	1.19799
8.1053	0	520	0	530	0	525	0	535	0	535	0	535	0	535	0	535	0	525	0	535	0	535	0	535	0	0	531.538	1.43051	0.405	-30.4396	-31.2522	-23.5641	-30.9084	-19.9076	-21.3452	-23.0328	-29.127	-30.5334	-24.6579	-22.8766	-29.7521	-26.4497	1.22612
8.1153	0	520	0	530	0	525	0	535	0	535	0	535	0	535	0	535	0	525	0	535	0	535	0	535	0	0	531.538	1.43051	0.4055	-31.6272	-31.1897	-23.6266	-30.0646	-20.5952	-23.4079	-22.1578	-28.0957	-29.8458	-24.0954	-24.1892	-30.5021	-26.6164	1.14562
8.1253	0	520	0	530	0	525	0	535	0	535	0	535	0	535	0	535	0	525	0	535	0	535	0	535	0	0	531.538	1.43051	0.406	-31.5647	-30.1896	-23.2516	-31.2834	-20.6264	-23.1266	-24.3454	-28.0957	-29.5645	-26.4081	-24.5329	-30.7834	-26.981	1.08224
8.1353	0	520	0	530	0	525	0	535	0	535	0	535	0	535	0	535	0	525	0	535	0	535	0	535	0	0	531.538	1.43051	0.4065	-31.2522	-31.3772	-23.9704	-30.9709	-20.2514	-22.7828	-22.7516	-29.1895	-30.9396	-24.6267	-23.6891	-30.0646	-26.8222	1.19812
8.1454	0	520	0	530	0	525	0	535	0	535	0	535	0	535	0	535	0	525	0	535	0	535	0	535	0	0	531.538	1.43051	0.407	-31.0959	-30.9709	-23.7829	-30.3458	-21.4077	-23.6891	-23.3766	-27.3769	-29.9396	-24.5329	-24.2829	-29.8146	-26.718	1.02496
8.1554	0	520	0	530	0	525	0	535	0	535	0	535	0	535	0	535	0	525	0	535	0	535	0	535	0	0	531.538	1.43051	0.4075	-31.2522	-30.8459	-23.8141	-28.877	-20.4077	-23.0953	-22.9703	-28.0019	-30.5646	-24.9392	-23.9079	-29.6583	-26.5279	1.07801
8.1654	0	520	0	530	0	525	0	535	0	535	0	535	0	535	0	535	0	525	0	535	0	535	0	535	0	0	531.538	1.43051	0.408	-31.4709	-31.0646	-23.0953	-30.8459	-19.6889	-22.7828	-22.6891	-28.1269	-31.2834	-24.1892	-23.4079	-30.8146	-26.6216	1.26018
8.1754	0	520	0	530	0	525	0	535	0	535	0	535	0	535	0	535	0	525	0	535	0	535	0	535	0	0	531.538	1.43051	0.4085	-31.1897	-31.1272	-23.2516	-31.0646	-20.7202	-23.4079	-23.4704	-28.3457	-30.6896	-25.158	-23.9079	-31.971	-27.0253	1.17756
8.1854	0	520	0	530	0	525	0	535	0	535	0	535	0	535	0	535	0	525	0	535	0	535	0	535	0	0	531.538	1.43051	0.409	-30.3458	-30.9084	-23.6579	-31.7834	-20.1264	-23.0016	-23.0641	-28.0332	-30.5959	-24.6892	-25.8143	-29.6896	-26.8091	1.12407
8.1955	0	520	0	530	0	525	0	535	0	535	0	535	0	535	0	535	0	525	0	535	0	535	0	535	0	0	531.538	1.43051	0.4095	-31.1584	-31.0334	-23.1578	-30.5646	-20.8452	-22.1578	-24.4079	-28.9707	-31.0646	-24.1579	-24.4704	-30.5646	-26.8795	1.15631
8.2055	0	520	0	530	0	525	0	535	0	535	0	535	0	535	0	535	0	525	0	535	0	535	0	535	0	0	531.538	1.43051	0.41	-31.1584	-30.9084	-23.6891	-30.4708	-20.6577	-22.6578	-22.7828	-28.1895	-31.1584	-25.1892	-23.8454	-29.1583	-26.6555	1.12685
8.2155	0	520	0	530	0	525	0	535	0	535	0	535	0	535	0	535	0	525	0	535	0	535	0	535	0	0	531.538	1.43051	0.4105	-30.0646	-30.8146	-23.4704	-29.8458	-20.6889	-23.1578	-23.3454	-28.5645	-31.7834	-24.3142	-24.2517	-30.7209	-26.7518	1.12023
8.2255	0	520	0	530	0	525	0	535	0	535	0	535	0	535	0	535	0	525	0	535	0	535	0	535	0	0	531.538	1.43051	0.411	-31.0021	-31.3772	-23.1578	-31.0021	-21.564	-22.5328	-23.5016	-28.7832	-30.1896	-25.0642	-23.7516	-29.127	-26.7545	1.09805
8.2355	0	520	0	530	0	525	0	535	0	535	0	535	0	535	0	535	0	525	0	535	0	535	0	535	0	0	531.538	1.43051	0.4115	-31.0959	-31.0959	-23.1266	-31.1897	-19.1888	-23.5329	-23.5329	-29.1895	-30.6896	-25.0017	-24.0642	-30.4396	-26.8456	1.21147
8.2455	0	520	0	530	0	525	0	535	0	535	0	535	0	535	0	535	0	525	0	535	0	535	0	535	0	0	531.538	1.43051	0.412	-31.1897	-30.8771	-23.6579	-31.3147	-19.4388	-21.7515	-22.1578	-28.0332	-29.9396	-24.6579	-24.1892	-31.6584	-26.5721	1.27069
8.2556	0	520	0	530	0	525	0	535	0	535	0	535	0	535	0	535	0	525	0	535	0	535	0	535	0	0	531.538	1.43051	0.4125	-30.9396	-31.0334	-23.1891	-28.6895	-20.4077	-23.0641	-23.1891	-27.7519	-29.4395	-25.0955	-23.0641	-29.9083	-26.3143	1.06987
8.2656	0	520	0	530	0	525	0	535	0	535	0	535	0	535	0	535	0	525	0	535	0	535	0	535	0	0	531.538	1.43051	0.413	-30.8459	-31.5959	-23.5641	-31.4084	-19.9701	-23.0641	-23.0953	-28.377	-31.3772	-23.3766	-23.6266	-29.0645	-26.6138	1.21651
8.2756	0	520	0	530	0	525	0	535	0	535	0	535	0	535	0	535	0	525	0	535	0	535	0	535	0	0	531.538	1.43051	0.4135	-30.6271	-31.2834	-23.6266	-30.5021	-20.8139	-23.0328	-21.5327	-28.3457	-30.5021	-24.0954	-24.0017	-31.3772	-26.6451	1.19403
8.2856	0	520	0	530	0	525	0	535	0	535	0	535	0	535	0	535	0	525	0	535	0	535	0	535	0	0	531.538	1.43051	0.414	-31.4397	-31.4709	-23.1891	-30.4708	-20.6264	-24.0954	-23.3141	-28.2832	-30.3771	-22.6266	-24.7205	-30.0333	-26.7206	1.14995
8.2956	0	520	0	530	0	525	0	535	0	535	0	535	0	535	0	535	0	525	0	535	0	535	0	535	0	0	531.538	1.43051	0.4145	-31.4397	-31.8459	-23.3141	-30.1271	-19.6889	-22.5016	-23.0953	-29.1895	-30.3458	-25.658	-22.4703	-30.1896	-26.6555	1.23874
8.3057	0	520	0	530	0	525	0	535	0	535	0	535	0	535	0	535	0	525	0	535	0	535	0	535	0	0	531.538	1.43051	0.415	-31.0959	-31.0646	-23.0016	-30.4083	-19.5638	-23.2829	-21.939	-29.6583	-31.5022	-24.6892	-24.1892	-30.8459	-26.7701	1.2624
8.3157	0	520	0	530	0	525	0	535	0	535	0	535	0	535	0	535	0	525	0	535	0	535	0	535	0	0	531.538	1.43051	0.4155	-31.1584	-31.2834	-23.1891	-29.8771	-19.8139	-24.0329	-23.0641	-27.4706	-30.1583	-26.9706	-23.8767	-31.7209	-26.8847	1.1562
8.3257	0	520	0	530	0	525	0	535	0	535	0	535	0	535	0	535	0	525	0	535	0	535	0	535	0	0	531.538	1.43051	0.416	-31.0334	-31.1272	-22.8141	-31.0646	-20.3764	-21.9703	-23.3141	-29.6271	-30.4083	-25.6268	-25.1267	-31.4709	-26.9967	1.21232
8.3357	0	520	0	530	0	525	0	535	0	535	0	535	0	535	0	535	0	525	0	535	0	535	0	535	0	0	531.538	1.43051	0.4165	-30.9709	-31.1897	-22.6578	-30.3146	-20.1264	-24.783	-23.1578	-27.1894	-30.8146	-24.1892	-23.7829	-31.4397	-26.718	1.17319
8.3457	0	520	0	530	0	525	0	535	0	535	0	535	0	535	0	535	0	525	0	535	0	535	0	535	0	0	531.538	1.43051	0.417	-31.5959	-30.8146	-22.8141	-30.0646	-20.6264	-21.7828	-21.689	-29.4083	-29.5645	-25.5018	-24.1267	-30.8146	-26.5669	1.21173
8.3558	0	520	0	530	0	525	0	535	0	535	0	535	0	535	0	535	0	525	0	535	0	535	0	535	0	0	531.538	1.43051	0.4175	-31.0646	-31.5647	-22.8141	-31.1272	-20.0014	-24.4079	-22.5641	-26.5956	-31.6272	-25.408	-24.0954	-30.7834	-26.8378	1.21179
8.3658	0	520	0	530	0	525	0	535	0	535	0	535	0	535	0	535	0	525	0	535	0	535	0	535	0	0	531.538	1.43051	0.418	-31.4397	-31.0021	-23.0328	-31.4084	-21.564	-24.0329	-23.0016	-29.3145	-30.3458	-24.7205	-24.1267	-31.4397	-27.1191	1.15071
8.3758	0	520	0	530	0	525	0	535	0	535	0	535	0	535	0	535	0	525	0	535	0	535	0	535	0	0	531.538	1.43051	0.4185	-31.0646	-31.1897	-23.2829	-30.4708	-21.5015	-22.8453	-22.3453	-26.5018	-31.0646	-24.5642	-24.1267	-31.4709	-26.7024	1.16445
8.3858	0	520	0	530	0	525	0	535	0	535	0	535	0	535	0	535	0	525	0	535	0	535	0	535	0	0	531.538	1.43051	0.419	-31.6272	-31.3459	-23.3766	-28.9082	-19.9076	-24.1892	-22.0328	-28.0644	-30.4083	-25.1892	-23.7516	-32.5022	-26.7753	1.21915
8.3958	0	520	0	530	0	525	0	535	0	535	0	535	0	535	0	535	0	525	0	535	0	535	0	535	0	0	531.538	1.43051	0.4195	-31.1584	-31.0334	-23.3141	-29.5645	-20.0639	-21.6578	-22.1265	-28.3145	-30.6584	-24.8142	-23.5329	-29.9396	-26.3482	1.19841
8.4059	0	520	0	530	0	525	0	535	0	535	0	535	0	535	0	535	0	525	0	535	0	535	0	535	0	0	531.538	1.43051	0.42	-31.2834	-31.0021	-23.0328	-29.9708	-19.8451	-24.5954	-23.4391	-27.5957	-31.1584	-24.908	-23.1891	-29.4395	-26.6216	1.13272
8.4159	0	520	0	530	0	525	0	535	0	535	0	535	0	535	0	535	0	525	0	535	0	535	0	535	0	0	531.538	1.43051	0.4205	-30.8146	-31.3459	-23.0953	-30.3146	-21.2827	-21.814	-22.9078	-29.3145	-30.1896	-25.533	-23.6891	-31.3147	-26.8013	1.17675
8.4259	0	520	0	530	0	525	0	535	0	535	0	535	0	535	0	535	0	525	0	535	0	535	0	535	0	0	531.538	1.43051	0.421	-30.9084	-30.6271	-23.7829	-28.8457	-21.0639	-22.9703	-23.4704	-27.4081	-31.0021	-25.408	-23.2829	-30.1583	-26.5774	1.05345
8.4359	0	520	0	530	0	525	0	535	0	535	0	535	0	535	0	535	0	525	0	535	0	535	0	535	0	0	531.538	1.43051	0.4215	-31.3772	-31.3772	-23.8454	-30.6896	-20.9389	-23.6266	-22.189	-30.0958	-31.1897	-24.8142	-22.064	-31.1897	-26.9498	1.25211
8.4459	0	520	0	530	0	525	0	535	0	535	0	535	0	535	0	535	0	525	0	535	0	535	0	535	0	0	531.538	1.43051	0.422	-31.6272	-31.3459	-23.2829	-30.3146	-20.7514	-22.189	-22.3765	-27.5019	-30.1896	-25.7518	-25.908	-31.3147	-26.8795	1.16867
8.4559	0	520	0	530	0	525	0	535	0	535	0	535	0	535	0	535	0	525	0	535	0	535	0	535	0	0	531.538	1.43051	0.4225	-31.2834	-31.0646	-23.6266	-30.0958	-20.1889	-22.9391	-22.9078	-28.5332	-30.1896	-25.5643	-23.5329	-32.346	-26.856	1.201
8.466	0	520	0	530	0	525	0	535	0	535	0	535	0	535	0	535	0	525	0	535	0	535	0	535	0	0	531.538	1.43051	0.423	-31.1897	-31.1584	-23.2829	-31.1272	-20.2827	-23.3141	-23.8141	-28.4707	-30.0958	-25.0017	-23.6266	-31.3772	-26.8951	1.17002
8.476	0	520	0	530	0	525	0	535	0	535	0	535	0	535	0	535	0	525	0	535	0	535	0	535	0	0	531.538	1.43051	0.4235	-31.1897	-31.2834	-23.3141	-30.4708	-19.9701	-22.8766	-22.7203	-27.5331	-30.4396	-24.6579	-25.1892	-29.8771	-26.6268	1.14732
8.486	0	520	0	530	0	525	0	535	0	535	0	535	0	535	0	535	0	525	0	535	0	535	0	535	0	0	531.538	1.43051	0.424	-31.6272	-31.1897	-23.1266	-29.6583	-20.5014	-22.6578	-22.7828	-27.9082	-30.8459	-25.158	-23.5954	-31.1897	-26.6867	1.18986
8.496	0	520	0	530	0	525	0	535	0	535	0	535	0	535	0	535	0	525	0	535	0	535	0	535	0	0	531.538	1.43051	0.4245	-31.6272	-31.1272	-22.9078	-30.4396	-20.6889	-22.0953	-22.5016	-28.5645	-30.4083	-24.9392	-22.9391	-31.4397	-26.6399	1.24347
8.506	0	520	0	530	0	525	0	535	0	535	0	535	0	535	0	535	0	525	0	535	0	535	0	535	0	0	531.538	1.43051	0.425	-31.3772	-31.5647	-23.0328	-30.8146	-19.6889	-22.7203	-23.4079	-27.7519	-31.5334	-24.1579	-23.5954	-30.1896	-26.6529	1.2446
8.5161	0	520	0	530	0	525	0	535	0	535	0	535	0	535	0	535	0	525	0	535	0	535	0	535	0	0	531.538	1.43051	0.4255	-31.1584	-30.5646	-23.0953	-31.0334	-21.4077	-23.4079	-22.6891	-28.0332	-29.9708	-24.4079	-22.189	-30.6896	-26.5539	1.15226
8.5261	0	520	0	530	0	525	0	535	0	535	0	535	0	535	0	535	0	525	0	535	0	535	0	535	0	0	531.538	1.43051	0.426	-31.2522	-31.6897	-22.9703	-29.9396	-20.4077	-23.3766	-22.7828	-28.6582	-30.4708	-24.9392	-23.6579	-30.8459	-26.7492	1.17929
8.5361	0	520	0	530	0	525	0	535	0	535	0	535	0	535	0	535	0	525	0	535	0	535	0	535	0	0	531.538	1.43051	0.4265	-31.1272	-31.0334	-23.1578	-30.5959	-20.7827	-23.4391	-21.8765	-27.7207	-30.4708	-25.9393	-23.9704	-29.8146	-26.6607	1.12812
8.5461	0	520	0	530	0	525	0	535	0	535	0	535	0	535	0	535	0	525	0	535	0	535	0	535	0	0	531.538	1.43051	0.427	-31.0021	-31.1897	-23.2829	-29.6896	-20.5014	-22.3453	-21.314	-29.3145	-31.5334	-25.1267	-23.7516	-31.8147	-26.7388	1.27083
8.5561	0	520	0	530	0	525	0	535	0	535	0	535	0	535	0	535	0	525	0	535	0	535	0	535	0	0	531.538	1.43051	0.4275	-31.5022	-31.971	-23.1266	-29.4083	-20.6264	-22.9391	-21.3765	-28.8457	-30.5646	-25.158	-25.408	-30.2521	-26.7649	1.18856
8.5662	0	520	0	530	0	525	0	535	0	535	0	535	0	535	0	535	0	525	0	535	0	535	0	535	0	0	531.538	1.43051	0.428	-30.5021	-31.3772	-23.4704	-31.9084	-20.7514	-22.8141	-23.2829	-28.1582	-30.5334	-25.5018	-23.5954	-29.6896	-26.7987	1.14405
8.5762	0	520	0	530	0	525	0	535	0	535	0	535	0	535	0	535	0	525	0	535	0	535	0	535	0	0	531.538	1.43051	0.4285	-30.6584	-31.4084	-22.9391	-30.8146	-21.9078	-22.7516	-22.2828	-27.7832	-30.8459	-25.5955	-23.4704	-29.1895	-26.6373	1.11172
8.5862	0	520	0	530	0	525	0	535	0	535	0	535	0	535	0	535	0	525	0	535	0	535	0	535	0	0	531.538	1.43051	0.429	-31.0646	-31.0646	-22.6891	-31.7522	-20.5952	-21.814	-21.3452	-28.4395	-30.9396	-25.9705	-24.5329	-29.8458	-26.6711	1.24816
8.5962	0	520	0	530	0	525	0	535	0	535	0	535	0	535	0	535	0	525	0	535	0	535	0	535	0	0	531.538	1.43051	0.4295	-31.1897	-30.8146	-22.6266	-31.4084	-20.1264	-22.9078	-22.3765	-27.1894	-30.5646	-25.3143	-22.8453	-29.4708	-26.4029	1.20197
8.6062	0	520	0	530	0	525	0	535	0	535	0	535	0	535	0	535	0	525	0	535	0	535	0	535	0	0	531.538	1.43051	0.43	-31.1272	-31.0021	-23.1266	-30.3458	-21.814	-24.1892	-22.5953	-28.1895	-30.1896	-24.3767	-23.6891	-28.6895	-26.6112	1.04417
8.6162	0	520	0	530	0	525	0	535	0	535	0	535	0	535	0	535	0	525	0	535	0	535	0	535	0	0	531.538	1.43051	0.4305	-31.1272	-31.1897	-22.6578	-30.5959	-18.7513	-22.8766	-23.1266	-28.6582	-30.6896	-24.8767	-24.5017	-29.377	-26.5357	1.22039
8.6263	0	520	0	530	0	525	0	535	0	535	0	535	0	535	0	535	0	525	0	535	0	535	0	535	0	0	531.538	1.43051	0.431	-31.2834	-31.3147	-22.8766	-30.8146	-19.6889	-22.4703	-22.5016	-28.1582	-31.1584	-24.6892	-22.2828	-32.1272	-26.6138	1.32987
8.6363	0	520	0	530	0	525	0	535	0	535	0	535	0	535	0	535	0	525	0	535	0	535	0	535	0	0	531.538	1.43051	0.4315	-30.9709	-31.0646	-23.0953	-33.1898	-21.0327	-22.6578	-22.1265	-28.627	-29.8146	-24.6892	-24.1579	-30.6896	-26.843	1.23511
8.6463	0	520	0	530	0	525	0	535	0	535	0	535	0	535	0	535	0	525	0	535	0	535	0	535	0	0	531.538	1.43051	0.432	-30.9709	-31.0959	-22.5328	-31.4709	-19.7514	-22.7203	-21.9078	-28.3457	-31.1272	-24.4392	-23.9392	-30.3146	-26.5513	1.26916
8.6563	0	520	0	530	0	525	0	535	0	535	0	535	0	535	0	535	0	525	0	535	0	535	0	535	0	0	531.538	1.43051	0.4325	-30.3458	-30.8146	-22.7516	-31.4397	-20.2202	-23.0016	-22.4703	-28.502	-30.0021	-25.033	-23.5641	-30.6584	-26.5669	1.18082
8.6663	0	520	0	530	0	525	0	535	0	535	0	535	0	535	0	535	0	525	0	535	0	535	0	535	0	0	531.538	1.43051	0.433	-30.9396	-31.0959	-22.7516	-31.7522	-20.7514	-22.5016	-22.0015	-27.1581	-30.0333	-24.5017	-24.8142	-31.5334	-26.6529	1.22024
8.6764	0	520	0	530	0	525	0	535	0	535	0	535	0	535	0	535	0	525	0	535	0	535	0	535	0	0	531.538	1.43051	0.4335	-30.9084	-31.0959	-22.8766	-31.1584	-20.1889	-23.4704	-21.8765	-27.3456	-30.5646	-25.158	-24.2829	-30.8146	-26.6451	1.19369
8.6864	0	520	0	530	0	525	0	535	0	535	0	535	0	535	0	535	0	525	0	535	0	535	0	535	0	0	531.538	1.43051	0.434	-30.6896	-30.7834	-22.4078	-30.9396	-19.9076	-23.5016	-23.1266	-27.6269	-31.0646	-24.2517	-24.0329	-31.5022	-26.6529	1.21286
8.6964	0	520	0	530	0	525	0	535	0	535	0	535	0	535	0	535	0	525	0	535	0	535	0	535	0	0	531.538	1.43051	0.4345	-30.4396	-30.8771	-22.7516	-31.971	-19.8451	-23.4391	-22.1578	-28.0644	-29.6583	-23.8767	-23.6891	-31.1584	-26.494	1.23116
8.7064	0	520	0	530	0	525	0	535	0	535	0	535	0	535	0	535	0	525	0	535	0	535	0	535	0	0	531.538	1.43051	0.435	-30.3771	-31.1272	-22.3453	-30.7521	-20.6889	-23.1266	-21.4702	-28.8145	-29.9396	-24.5954	-24.6892	-29.5958	-26.4602	1.15434
8.7164	0	520	0	530	0	525	0	535	0	535	0	535	0	535	0	535	0	525	0	535	0	535	0	535	0	0	531.538	1.43051	0.4355	-31.0334	-30.2833	-22.8453	-30.5646	-21.564	-23.3141	-21.7828	-27.9082	-30.5334	-24.3142	-24.0017	-30.0958	-26.5201	1.11364
8.7265	0	520	0	530	0	525	0	535	0	535	0	535	0	535	0	535	0	525	0	535	0	535	0	535	0	0	531.538	1.43051	0.436	-31.0646	-30.4083	-22.8141	-30.4708	-20.4389	-22.8766	-21.0952	-27.8769	-31.0334	-24.5954	-23.8454	-29.7521	-26.356	1.19339
8.7365	0	520	0	530	0	525	0	535	0	535	0	535	0	535	0	535	0	525	0	535	0	535	0	535	0	0	531.538	1.43051	0.4365	-30.8146	-31.1897	-22.064	-30.6271	-21.2827	-21.3765	-22.0953	-28.0332	-30.7521	-25.0642	-24.8767	-31.4084	-26.632	1.22846
8.7465	0	520	0	530	0	525	0	535	0	535	0	535	0	535	0	535	0	525	0	535	0	535	0	535	0	0	531.538	1.43051	0.437	-30.8146	-30.4396	-22.6266	-31.5959	-20.7514	-23.6579	-21.5327	-28.0644	-30.5646	-24.9392	-22.7828	-29.502	-26.4393	1.18416
8.7565	0	520	0	530	0	525	0	535	0	535	0	535	0	535	0	535	0	525	0	535	0	535	0	535	0	0	531.538	1.43051	0.4375	-30.6584	-31.0021	-22.9391	-30.7834	-20.1889	-23.6266	-21.0327	-28.2832	-30.9709	-24.4392	-24.0017	-31.3772	-26.6086	1.24276
8.7665	0	520	0	530	0	525	0	535	0	535	0	535	0	535	0	535	0	525	0	535	0	535	0	535	0	0	531.538	1.43051	0.438	-30.4396	-30.9084	-22.314	-32.1897	-20.7202	-23.7204	-22.0953	-28.377	-30.8146	-24.5954	-24.3142	-30.0646	-26.7128	1.1937
8.7765	0	520	0	530	0	525	0	535	0	535	0	535	0	535	0	535	0	525	0	535	0	535	0	535	0	0	531.538	1.43051	0.4385	-30.5334	-31.4397	-23.0016	-30.7209	-21.0952	-23.0016	-22.8766	-27.7519	-30.5959	-24.4704	-25.033	-31.1897	-26.8091	1.13739
8.7866	0	520	0	530	0	525	0	535	0	535	0	535	0	535	0	535	0	525	0	535	0	535	0	535	0	0	531.538	1.43051	0.439	-29.9083	-31.1272	-22.8141	-29.127	-21.814	-23.0641	-21.3765	-28.0332	-30.3771	-25.033	-24.1892	-30.4083	-26.4393	1.07884
8.7966	0	520	0	530	0	525	0	535	0	535	0	535	0	535	0	535	0	525	0	535	0	535	0	535	0	0	531.538	1.43051	0.4395	-30.4708	-30.9084	-22.9078	-30.5646	-21.1265	-23.7516	-21.6265	-27.6269	-30.3771	-24.5329	-23.9079	-29.4708	-26.4393	1.1026
8.8066	0	520	0	530	0	525	0	535	0	535	0	535	0	535	0	535	0	525	0	535	0	535	0	535	0	0	531.538	1.43051	0.44	-30.9084	-30.9084	-22.9391	-31.3147	-21.439	-23.1891	-19.4388	-27.4394	-31.5959	-24.6892	-24.5017	-31.2834	-26.6373	1.28494
8.8166	0	520	0	530	0	525	0	535	0	535	0	535	0	535	0	535	0	525	0	535	0	535	0	535	0	0	531.538	1.43051	0.4405	-31.0646	-30.1896	-22.7828	-31.6897	-20.5327	-23.7829	-21.3452	-28.9082	-29.6271	-25.4393	-24.0329	-30.1583	-26.6294	1.17013
8.8266	0	520	0	530	0	525	0	535	0	535	0	535	0	535	0	535	0	525	0	535	0	535	0	535	0	0	531.538	1.43051	0.441	-30.9084	-31.0646	-22.314	-30.2521	-20.9389	-21.7515	-20.9077	-27.7832	-29.3145	-25.908	-24.1579	-29.4708	-26.231	1.16768
8.8367	0	520	0	530	0	525	0	535	0	535	0	535	0	535	0	535	0	525	0	535	0	535	0	535	0	0	531.538	1.43051	0.4415	-30.8459	-30.9084	-22.5328	-28.5957	-20.6264	-23.1891	-21.6265	-29.1895	-29.6583	-25.158	-23.9704	-29.002	-26.2753	1.09657
8.8467	0	520	0	530	0	525	0	535	0	535	0	535	0	535	0	535	0	525	0	535	0	535	0	535	0	0	531.538	1.43051	0.442	-30.4396	-30.5646	-23.2829	-30.4396	-20.6577	-24.0329	-21.439	-27.9707	-32.1585	-24.4704	-24.9705	-29.1895	-26.6347	1.13951
8.8567	0	520	0	530	0	525	0	535	0	535	0	535	0	535	0	535	0	525	0	535	0	535	0	535	0	0	531.538	1.43051	0.4425	-31.2522	-31.0021	-22.5953	-29.5645	-21.189	-22.189	-21.0327	-29.8771	-30.4083	-25.0642	-25.3455	-30.0646	-26.632	1.18942
8.8667	0	520	0	530	0	525	0	535	0	535	0	535	0	535	0	535	0	525	0	535	0	535	0	535	0	0	531.538	1.43051	0.443	-31.0334	-30.9709	-23.4079	-30.9396	-21.0327	-25.3143	-21.0952	-25.5955	-31.1897	-24.3767	-23.6579	-29.0332	-26.4706	1.14192
8.8767	0	520	0	530	0	525	0	535	0	535	0	535	0	535	0	535	0	525	0	535	0	535	0	535	0	0	531.538	1.43051	0.4435	-30.8771	-30.5646	-23.1891	-31.1584	-20.1889	-22.2515	-22.3453	-30.8459	-31.6584	-25.0955	-23.9079	-29.8458	-26.8274	1.25403
8.8868	0	520	0	530	0	525	0	535	0	535	0	535	0	535	0	535	0	525	0	535	0	535	0	535	0	0	531.538	1.43051	0.444	-31.0959	-31.1272	-23.0953	-31.0021	-19.6889	-23.4704	-20.1576	-26.1893	-29.4708	-25.408	-25.3455	-29.5645	-26.3013	1.2015
8.8968	0	520	0	530	0	525	0	535	0	535	0	535	0	535	0	535	0	525	0	535	0	535	0	535	0	0	531.538	1.43051	0.4445	-31.4084	-30.9709	-22.6891	-31.1897	-19.5326	-23.2829	-21.0639	-29.377	-31.1584	-25.7518	-23.3454	-30.5334	-26.6919	1.30662
8.9068	0	520	0	530	0	525	0	535	0	535	0	535	0	535	0	535	0	525	0	535	0	535	0	535	0	0	531.538	1.43051	0.445	-30.4396	-31.8459	-22.9078	-30.2521	-20.3764	-22.5328	-20.9077	-27.1581	-30.5646	-24.6579	-24.4079	-29.6271	-26.3065	1.19863
8.9168	0	520	0	530	0	525	0	535	0	535	0	535	0	535	0	535	0	525	0	535	0	535	0	535	0	0	531.538	1.43051	0.4455	-30.3146	-30.7521	-23.3454	-30.7834	-20.6889	-23.8767	-20.8764	-28.8457	-30.1896	-25.158	-23.9704	-29.4083	-26.5175	1.13142
8.9268	0	520	0	530	0	525	0	535	0	535	0	535	0	535	0	535	0	525	0	535	0	535	0	535	0	0	531.538	1.43051	0.446	-31.3459	-30.9084	-22.9391	-30.3771	-21.1265	-22.5016	-20.1889	-26.8456	-31.1897	-23.1266	-24.0017	-29.5333	-26.1737	1.24005
8.9369	0	520	0	530	0	525	0	535	0	535	0	535	0	535	0	535	0	525	0	535	0	535	0	535	0	0	531.538	1.43051	0.4465	-31.1272	-31.0021	-23.5954	-30.4708	-20.7514	-24.4392	-20.1264	-28.5332	-31.0646	-25.4393	-23.6266	-29.1583	-26.6112	1.18408
8.9469	0	520	0	530	0	525	0	535	0	535	0	535	0	535	0	535	0	525	0	535	0	535	0	535	0	0	531.538	1.43051	0.447	-30.9396	-30.7834	-23.0016	-29.0958	-20.6889	-21.7515	-21.3765	-27.9394	-30.0646	-26.3768	-24.0954	-29.8146	-26.3273	1.13753
8.9569	0	520	0	530	0	525	0	535	0	535	0	535	0	535	0	535	0	525	0	535	0	535	0	535	0	0	531.538	1.43051	0.4475	-31.4397	-31.1897	-23.2516	-30.3458	-20.3139	-24.1579	-19.2826	-26.2518	-30.5021	-25.2517	-24.3142	-29.9083	-26.3508	1.23504
8.9669	0	520	0	530	0	525	0	535	0	535	0	535	0	535	0	535	0	525	0	535	0	535	0	535	0	0	531.538	1.43051	0.448	-30.5959	-30.6896	-22.9391	-31.7834	-19.8451	-23.0953	-21.2827	-28.9082	-30.1896	-25.2517	-22.1578	-31.1897	-26.494	1.29053
8.9769	0	520	0	530	0	525	0	535	0	535	0	535	0	535	0	535	0	525	0	535	0	535	0	535	0	0	531.538	1.43051	0.4485	-31.7522	-31.5647	-23.0328	-30.3458	-21.189	-24.1579	-21.2515	-28.502	-30.1896	-25.4393	-23.9392	-30.9709	-26.8612	1.1839
8.9869	0	520	0	530	0	525	0	535	0	535	0	535	0	535	0	535	0	525	0	535	0	535	0	535	0	0	531.538	1.43051	0.449	-31.5334	-31.1584	-22.2828	-31.971	-19.4388	-22.189	-21.189	-27.5957	-31.4397	-24.8455	-24.3142	-28.377	-26.3612	1.31372
8.997	0	520	0	530	0	525	0	535	0	535	0	535	0	535	0	535	0	525	0	535	0	535	0	535	0	0	531.538	1.43051	0.4495	-31.3772	-31.5334	-23.5016	-32.0022	-19.9389	-24.0329	-21.439	-29.0958	-30.6271	-24.9392	-25.7205	-30.4396	-27.054	1.23641
9.007	0	520	0	530	0	525	0	535	0	535	0	535	0	535	0	535	0	525	0	535	0	535	0	535	0	0	531.538	1.43051	0.45	-30.6896	-30.6896	-22.8766	-30.9396	-21.564	-22.3453	-20.6264	-26.5956	-30.1896	-24.9392	-23.8141	-30.5959	-26.3221	1.17981
9.017	0	520	0	530	0	525	0	535	0	535	0	535	0	535	0	535	0	525	0	535	0	535	0	535	0	0	531.538	1.43051	0.4505	-31.0334	-31.0646	-23.1266	-31.3772	-20.4389	-22.0015	-20.5639	-28.0019	-31.8772	-24.8767	-23.1578	-29.5333	-26.4211	1.29938
9.027	0	520	0	530	0	525	0	535	0	535	0	535	0	535	0	535	0	525	0	535	0	535	0	535	0	0	531.538	1.43051	0.451	-31.1272	-31.0334	-23.3454	-31.971	-20.5952	-23.5016	-21.7515	-27.6894	-30.8771	-25.0955	-24.0642	-29.6583	-26.7258	1.18735
9.037	0	520	0	530	0	525	0	535	0	535	0	535	0	535	0	535	0	525	0	535	0	535	0	535	0	0	531.538	1.43051	0.4515	-31.3459	-31.1897	-22.8141	-33.1898	-20.0326	-23.0016	-20.1264	-27.8144	-31.5647	-25.4393	-23.8767	-28.752	-26.5956	1.34517
9.0471	0	520	0	530	0	525	0	535	0	535	0	535	0	535	0	535	0	525	0	535	0	535	0	535	0	0	531.538	1.43051	0.452	-31.0646	-31.1584	-23.1578	-32.6898	-20.3764	-23.5954	-20.4389	-27.1581	-31.0334	-25.7518	-24.1267	-28.377	-26.5774	1.24718
9.0571	0	520	0	530	0	525	0	535	0	535	0	535	0	535	0	535	0	525	0	535	0	535	0	535	0	0	531.538	1.43051	0.4525	-31.0646	-30.8459	-23.3454	-30.6271	-20.6577	-22.8141	-21.0952	-28.502	-29.8771	-24.3767	-24.0954	-30.3771	-26.4732	1.18182
9.0671	0	520	0	530	0	525	0	535	0	535	0	535	0	535	0	535	0	525	0	535	0	535	0	535	0	0	531.538	1.43051	0.453	-30.9084	-30.6584	-22.9391	-29.9396	-18.5325	-22.5641	-20.5327	-27.8769	-30.3146	-24.6892	-23.3766	-29.377	-25.9758	1.26215
9.0771	0	520	0	530	0	525	0	535	0	535	0	535	0	535	0	535	0	525	0	535	0	535	0	535	0	0	531.538	1.43051	0.4535	-31.0334	-30.9084	-22.9078	-31.0959	-21.0639	-21.939	-20.1889	-28.4082	-31.5959	-24.0329	-23.6266	-29.0332	-26.3195	1.27379
9.0871	0	520	0	530	0	525	0	535	0	535	0	535	0	535	0	535	0	525	0	535	0	535	0	535	0	0	531.538	1.43051	0.454	-31.4084	-30.8146	-22.9391	-30.9709	-20.6264	-22.7516	-20.2514	-28.0332	-30.8771	-26.033	-24.4392	-28.4395	-26.4654	1.20822
9.0972	0	520	0	530	0	525	0	535	0	535	0	535	0	535	0	535	0	525	0	535	0	535	0	535	0	0	531.538	1.43051	0.4545	-31.1272	-31.1272	-23.4704	-30.9084	-21.1265	-22.2828	-21.7828	-28.0332	-30.3771	-24.6579	-24.1267	-27.8144	-26.4029	1.12939
9.1072	0	520	0	530	0	525	0	535	0	535	0	535	0	535	0	535	0	525	0	535	0	535	0	535	0	0	531.538	1.43051	0.455	-31.5334	-31.6584	-22.9703	-31.2522	-20.4077	-23.0328	-19.9701	-28.4082	-31.2209	-26.4393	-22.3453	-27.9394	-26.4315	1.3026
9.1172	0	520	0	530	0	525	0	535	0	535	0	535	0	535	0	535	0	525	0	535	0	535	0	535	0	0	531.538	1.43051	0.4555	-31.5022	-31.1272	-23.0641	-31.1897	-19.9389	-24.0642	-20.2202	-27.6894	-30.5959	-24.1892	-24.4704	-27.5331	-26.2987	1.22127
9.1272	0	520	0	530	0	525	0	535	0	535	0	535	0	535	0	535	0	525	0	535	0	535	0	535	0	0	531.538	1.43051	0.456	-31.6584	-31.1584	-23.5329	-32.1897	-20.1576	-23.8141	-20.4389	-27.9707	-30.5646	-24.4704	-24.0017	-28.9082	-26.5721	1.25663
9.1372	0	520	0	530	0	525	0	535	0	535	0	535	0	535	0	535	0	525	0	535	0	535	0	535	0	0	531.538	1.43051	0.4565	-30.8146	-30.6584	-22.8766	-30.8771	-21.564	-22.6578	-22.3453	-28.8457	-30.5959	-23.5954	-23.6579	-29.1895	-26.4732	1.13686
9.1472	0	520	0	530	0	525	0	535	0	535	0	535	0	535	0	535	0	525	0	535	0	535	0	535	0	0	531.538	1.43051	0.457	-31.5334	-30.8459	-22.9703	-31.4397	-21.189	-22.8766	-20.1889	-28.6895	-30.8146	-25.8143	-25.658	-28.8145	-26.7362	1.20455
9.1573	0	520	0	530	0	525	0	535	0	535	0	535	0	535	0	535	0	525	0	535	0	535	0	535	0	0	531.538	1.43051	0.4575	-31.3459	-30.6896	-22.9703	-31.0646	-20.7514	-23.0953	-20.3452	-27.7832	-30.6584	-25.5955	-24.6579	-29.002	-26.4966	1.18788
9.1673	0	520	0	530	0	525	0	535	0	535	0	535	0	535	0	535	0	525	0	535	0	535	0	535	0	0	531.538	1.43051	0.458	-31.1897	-30.9084	-22.0953	-32.0647	-21.3452	-22.5953	-21.314	-28.502	-30.5959	-25.2517	-23.9392	-28.752	-26.5461	1.21373
9.1773	0	520	0	530	0	525	0	535	0	535	0	535	0	535	0	535	0	525	0	535	0	535	0	535	0	0	531.538	1.43051	0.4585	-31.4084	-31.4709	-23.0953	-29.6271	-20.9389	-23.5329	-20.3764	-28.2207	-29.9396	-24.9705	-23.4079	-29.502	-26.3742	1.17717
9.1873	0	520	0	530	0	525	0	535	0	535	0	535	0	535	0	535	0	525	0	535	0	535	0	535	0	0	531.538	1.43051	0.459	-31.7209	-31.1272	-22.9703	-30.7209	-20.1889	-22.8453	-20.2202	-28.0332	-30.4396	-25.5643	-24.0642	-28.1895	-26.3404	1.2272
9.1973	0	520	0	530	0	525	0	535	0	535	0	535	0	535	0	535	0	525	0	535	0	535	0	535	0	0	531.538	1.43051	0.4595	-31.0021	-31.4084	-23.0328	-30.2521	-20.1576	-23.3454	-20.1264	-29.002	-30.1583	-24.1892	-24.0329	-31.5959	-26.5253	1.28597
9.2074	0	520	0	530	0	525	0	535	0	535	0	535	0	535	0	535	0	525	0	535	0	535	0	535	0	0	531.538	1.43051	0.46	-31.3772	-31.4397	-23.1891	-31.5022	-20.9077	-22.1578	-20.1889	-28.9395	-30.9084	-24.9705	-24.3142	-28.3145	-26.5175	1.26107
9.2174	0	520	0	530	0	525	0	535	0	535	0	535	0	535	0	535	0	525	0	535	0	535	0	535	0	0	531.538	1.43051	0.4605	-31.0959	-30.7521	-22.9391	-30.6896	-21.189	-22.9703	-21.5327	-28.1895	-29.6583	-26.0018	-25.5018	-28.4707	-26.5826	1.07538
9.2274	0	520	0	530	0	525	0	535	0	535	0	535	0	535	0	535	0	525	0	535	0	535	0	535	0	0	531.538	1.43051	0.461	-30.9084	-31.1897	-23.5016	-29.4708	-20.8452	-22.0015	-19.9701	-28.377	-29.6271	-24.5017	-24.4704	-29.6583	-26.2101	1.18218
9.2374	0	520	0	530	0	525	0	535	0	535	0	535	0	535	0	535	0	525	0	535	0	535	0	535	0	0	531.538	1.43051	0.4615	-31.3459	-30.6896	-22.7828	-29.8146	-21.3765	-22.9703	-20.0014	-28.9395	-30.1583	-25.9393	-24.1579	-28.6582	-26.4029	1.15621
9.2474	0	520	0	530	0	525	0	535	0	535	0	535	0	535	0	535	0	525	0	535	0	535	0	535	0	0	531.538	1.43051	0.462	-31.5647	-29.9708	-23.4704	-30.8459	-20.6577	-22.0328	-20.5014	-27.4394	-30.4396	-24.5954	-23.7516	-28.502	-26.1476	1.18685
9.2575	0	520	0	530	0	525	0	535	0	535	0	535	0	535	0	535	0	525	0	535	0	535	0	535	0	0	531.538	1.43051	0.4625	-31.9084	-30.9084	-23.1891	-31.0959	-21.0952	-22.8453	-19.3451	-29.3145	-31.0959	-26.1893	-23.6266	-29.3458	-26.6633	1.29013
9.2675	0	520	0	530	0	525	0	535	0	535	0	535	0	535	0	535	0	525	0	535	0	535	0	535	0	0	531.538	1.43051	0.463	-31.3147	-30.8771	-23.1891	-30.8771	-20.6889	-23.3454	-20.1576	-28.0644	-30.3146	-25.3143	-23.4391	-26.5018	-26.1737	1.17713
9.2775	0	520	0	530	0	525	0	535	0	535	0	535	0	535	0	535	0	525	0	535	0	535	0	535	0	0	531.538	1.43051	0.4635	-31.0334	-30.5959	-22.9391	-32.346	-20.1889	-23.0016	-19.8451	-28.5957	-29.8146	-25.1892	-24.908	-28.4395	-26.4081	1.24265
9.2875	0	520	0	530	0	525	0	535	0	535	0	535	0	535	0	535	0	525	0	535	0	535	0	535	0	0	531.538	1.43051	0.464	-31.1897	-30.9084	-23.0953	-30.7834	-20.5014	-22.6266	-19.5326	-27.7832	-31.2834	-25.658	-24.9392	-29.1583	-26.455	1.24806
9.2975	0	520	0	530	0	525	0	535	0	535	0	535	0	535	0	535	0	525	0	535	0	535	0	535	0	0	531.538	1.43051	0.4645	-31.2834	-30.6584	-23.6579	-31.9084	-20.6889	-22.189	-19.6263	-29.4083	-29.9708	-25.5955	-22.8766	-27.9707	-26.3195	1.27126
9.3076	0	520	0	530	0	525	0	535	0	535	0	535	0	535	0	535	0	525	0	535	0	535	0	535	0	0	531.538	1.43051	0.465	-31.5022	-30.3458	-23.0328	-30.1271	-21.4702	-22.6891	-20.0014	-27.3456	-30.9084	-26.0955	-24.1892	-30.7834	-26.5409	1.20297
9.3176	0	520	0	530	0	525	0	535	0	535	0	535	0	535	0	535	0	525	0	535	0	535	0	535	0	0	531.538	1.43051	0.4655	-31.4709	-31.0959	-23.1891	-30.8771	-21.4077	-21.9078	-18.4388	-28.4707	-30.5959	-26.6581	-24.4704	-29.0958	-26.4732	1.2895
9.3276	0	520	0	530	0	525	0	535	0	535	0	535	0	535	0	535	0	525	0	535	0	535	0	535	0	0	531.538	1.43051	0.466	-31.3459	-31.0021	-23.1891	-30.1896	-20.5639	-22.189	-19.4076	-29.1583	-30.1583	-26.2831	-25.1892	-29.1583	-26.4862	1.23623
9.3376	0	520	0	530	0	525	0	535	0	535	0	535	0	535	0	535	0	525	0	535	0	535	0	535	0	0	531.538	1.43051	0.4665	-31.0646	-30.9084	-23.0328	-31.1272	-20.1576	-22.6891	-19.0013	-28.1269	-30.2833	-26.4081	-23.8454	-31.0646	-26.4758	1.31865
9.3476	0	520	0	530	0	525	0	535	0	535	0	535	0	535	0	535	0	525	0	535	0	535	0	535	0	0	531.538	1.43051	0.467	-31.1897	-30.2521	-23.6266	-32.1585	-21.0952	-22.6266	-19.6263	-29.0958	-30.9709	-23.7829	-24.2829	-30.1583	-26.5721	1.29145
9.3576	0	520	0	530	0	525	0	535	0	535	0	535	0	535	0	535	0	525	0	535	0	535	0	535	0	0	531.538	1.43051	0.4675	-31.0021	-30.7209	-23.0328	-30.2208	-20.4389	-22.0015	-19.1888	-26.9706	-30.6584	-26.0955	-24.3454	-29.6271	-26.1919	1.24723
9.3677	0	520	0	530	0	525	0	535	0	535	0	535	0	535	0	535	0	525	0	535	0	535	0	535	0	0	531.538	1.43051	0.468	-31.0021	-30.6584	-23.0328	-28.8145	-20.4077	-23.6891	-18.1575	-30.9709	-31.1272	-26.0018	-23.0641	-29.8771	-26.4003	1.33227
9.3777	0	520	0	530	0	525	0	535	0	535	0	535	0	535	0	535	0	525	0	535	0	535	0	535	0	0	531.538	1.43051	0.4685	-31.5959	-30.4083	-24.1892	-31.0959	-21.2515	-21.1577	-18.9076	-26.4706	-29.6896	-24.8455	-24.4079	-29.002	-26.0851	1.23987
9.3877	0	520	0	530	0	525	0	535	0	535	0	535	0	535	0	535	0	525	0	535	0	535	0	535	0	0	531.538	1.43051	0.469	-31.4709	-30.6271	-23.0953	-29.7521	-20.4702	-23.8767	-19.3763	-29.9396	-30.0333	-26.4706	-24.3142	-29.127	-26.5461	1.2119
9.3977	0	520	0	530	0	525	0	535	0	535	0	535	0	535	0	535	0	525	0	535	0	535	0	535	0	0	531.538	1.43051	0.4695	-31.5959	-30.8459	-23.1578	-30.7521	-20.8452	-21.6578	-20.8764	-26.8456	-30.4396	-25.408	-24.5642	-29.002	-26.3325	1.19233
9.4077	0	520	0	530	0	525	0	535	0	535	0	535	0	535	0	535	0	525	0	535	0	535	0	535	0	0	531.538	1.43051	0.47	-31.5022	-30.9084	-23.5641	-30.1896	-20.7514	-22.6578	-19.2513	-28.4395	-30.8146	-25.0955	-22.7828	-28.3457	-26.1919	1.25371
9.4178	0	520	0	530	0	525	0	535	0	535	0	535	0	535	0	535	0	525	0	535	0	535	0	535	0	0	531.538	1.43051	0.4705	-31.1897	-30.6271	-24.2829	-31.3147	-21.1265	-23.1578	-19.5638	-27.7519	-31.0334	-25.1267	-24.1892	-30.1583	-26.6268	1.22416
9.4278	0	520	0	530	0	525	0	535	0	535	0	535	0	535	0	535	0	525	0	535	0	535	0	535	0	0	531.538	1.43051	0.471	-31.5022	-30.9084	-23.0328	-31.1897	-21.689	-21.189	-19.4388	-29.4708	-30.8771	-25.3143	-24.4392	-27.6582	-26.3924	1.27482
9.4378	0	520	0	530	0	525	0	535	0	535	0	535	0	535	0	535	0	525	0	535	0	535	0	535	0	0	531.538	1.43051	0.4715	-31.0334	-30.8771	-23.5016	-32.1897	-21.4077	-23.9704	-20.1576	-28.1895	-29.3145	-25.2517	-22.3765	-28.7832	-26.4211	1.19375
9.4478	0	520	0	530	0	525	0	535	0	535	0	535	0	535	0	535	0	525	0	535	0	535	0	535	0	0	531.538	1.43051	0.472	-31.8772	-30.7521	-23.1891	-31.8147	-21.3765	-21.7203	-18.6888	-27.1581	-30.1896	-25.6893	-23.7204	-29.4395	-26.3013	1.31112
9.4578	0	520	0	530	0	525	0	535	0	535	0	535	0	535	0	535	0	525	0	535	0	535	0	535	0	0	531.538	1.43051	0.4725	-32.4085	-31.1897	-22.9391	-30.8771	-21.4702	-23.6579	-18.8763	-29.4083	-31.9084	-25.0955	-23.3454	-28.9395	-26.6763	1.33556
9.4679	0	520	0	530	0	525	0	535	0	535	0	535	0	535	0	535	0	525	0	535	0	535	0	535	0	0	531.538	1.43051	0.473	-31.5959	-31.2522	-23.4079	-32.0022	-20.5327	-22.7203	-19.6889	-26.9706	-30.5959	-25.8455	-24.1892	-30.0958	-26.5748	1.29188
9.4779	0	520	0	530	0	525	0	535	0	535	0	535	0	535	0	535	0	525	0	535	0	535	0	535	0	0	531.538	1.43051	0.4735	-31.6897	-30.3146	-23.1891	-31.3459	-20.5952	-22.5016	-18.6575	-28.1582	-30.4708	-25.4705	-23.3141	-29.8146	-26.2935	1.31567
9.4879	0	520	0	530	0	525	0	535	0	535	0	535	0	535	0	535	0	525	0	535	0	535	0	535	0	0	531.538	1.43051	0.474	-31.3147	-30.6896	-22.9703	-31.1272	-20.8139	-23.1266	-18.3138	-27.3769	-30.5646	-26.0955	-24.0642	-30.0646	-26.3768	1.29463
9.4979	0	520	0	530	0	525	0	535	0	535	0	535	0	535	0	535	0	525	0	535	0	535	0	535	0	0	531.538	1.43051	0.4745	-31.8459	-30.8146	-23.3766	-30.8771	-20.3139	-21.0952	-19.3763	-28.877	-30.3146	-24.1267	-24.4704	-27.0331	-26.0435	1.29706
9.5079	0	520	0	530	0	525	0	535	0	535	0	535	0	535	0	535	0	525	0	535	0	535	0	535	0	0	531.538	1.43051	0.475	-31.6272	-30.8459	-23.5641	-31.3147	-20.5327	-23.5641	-17.345	-28.5957	-30.5646	-24.2829	-24.8142	-29.8458	-26.4081	1.36177
9.5179	0	520	0	530	0	525	0	535	0	535	0	535	0	535	0	535	0	525	0	535	0	535	0	535	0	0	531.538	1.43051	0.4755	-31.5022	-30.7521	-24.1579	-31.0646	-20.3764	-22.4391	-19.4701	-28.877	-31.1897	-25.8768	-23.1891	-29.0645	-26.4966	1.2863
9.528	0	520	0	530	0	525	0	535	0	535	0	535	0	535	0	535	0	525	0	535	0	535	0	535	0	0	531.538	1.43051	0.476	-32.0022	-31.0646	-23.3454	-32.1897	-21.3765	-22.0328	-18.0637	-27.8144	-30.5021	-24.2829	-24.1892	-28.9082	-26.3143	1.36014
9.538	0	520	0	530	0	525	0	535	0	535	0	535	0	535	0	535	0	525	0	535	0	535	0	535	0	0	531.538	1.43051	0.4765	-31.7209	-29.8771	-23.4704	-32.0335	-19.4701	-23.4391	-19.1888	-28.502	-29.8771	-27.1581	-23.9704	-29.4083	-26.5096	1.29511
9.548	0	520	0	530	0	525	0	535	0	535	0	535	0	535	0	535	0	525	0	535	0	535	0	535	0	0	531.538	1.43051	0.477	-31.4397	-30.3146	-23.0953	-29.8146	-18.8763	-23.0016	-19.3451	-27.8769	-30.8146	-24.1579	-25.4393	-29.1895	-26.1138	1.27816
9.558	0	520	0	530	0	525	0	535	0	535	0	535	0	535	0	535	0	525	0	535	0	535	0	535	0	0	531.538	1.43051	0.4775	-31.7834	-30.5021	-23.5641	-29.6271	-19.6889	-23.0328	-19.8764	-28.4707	-30.6584	-25.6893	-24.4392	-29.8771	-26.4341	1.2372
9.568	0	520	0	530	0	525	0	535	0	535	0	535	0	535	0	535	0	525	0	535	0	535	0	535	0	0	531.538	1.43051	0.478	-31.7834	-30.6896	-23.4704	-31.1584	-20.3764	-22.8766	-18.2825	-28.4707	-30.0958	-25.6268	-24.1579	-30.0646	-26.4211	1.32057
9.5781	0	520	0	530	0	525	0	535	0	535	0	535	0	535	0	535	0	525	0	535	0	535	0	535	0	0	531.538	1.43051	0.4785	-31.7834	-30.6896	-23.4079	-31.5022	-20.6889	-23.8767	-18.9076	-27.8769	-30.0646	-25.8143	-24.0954	-28.4707	-26.4315	1.2402
9.5881	0	520	0	530	0	525	0	535	0	535	0	535	0	535	0	535	0	525	0	535	0	535	0	535	0	0	531.538	1.43051	0.479	-31.3147	-30.4396	-22.9703	-31.2834	-20.5014	-23.2516	-17.7825	-28.7207	-29.9396	-24.6892	-24.6892	-27.8144	-26.1164	1.29056
9.5981	0	520	0	530	0	525	0	535	0	535	0	535	0	535	0	535	0	525	0	535	0	535	0	535	0	0	531.538	1.43051	0.4795	-31.7834	-30.6271	-23.1891	-30.7521	-20.5639	-22.5016	-18.1888	-28.377	-30.8771	-25.3768	-24.1579	-31.0334	-26.4523	1.36027
9.6081	0	520	0	530	0	525	0	535	0	535	0	535	0	535	0	535	0	525	0	535	0	535	0	535	0	0	531.538	1.43051	0.48	-31.3772	-31.0646	-23.2516	-30.7834	-19.9701	-23.6579	-18.1888	-28.3457	-28.4395	-25.0955	-24.5954	-28.627	-26.1164	1.25783
9.6181	0	520	0	530	0	525	0	535	0	535	0	535	0	535	0	535	0	525	0	535	0	535	0	535	0	0	531.538	1.43051	0.4805	-31.2834	-30.9709	-23.3766	-31.1272	-21.314	-23.0641	-18.1262	-27.9394	-31.0646	-25.783	-25.7518	-29.6271	-26.619	1.28052
9.6282	0	520	0	530	0	525	0	535	0	535	0	535	0	535	0	535	0	525	0	535	0	535	0	535	0	0	531.538	1.43051	0.481	-31.1897	-31.0646	-22.9391	-28.5957	-20.1889	-22.314	-19.4701	-28.0957	-30.8459	-25.3768	-22.8766	-29.5333	-26.0409	1.25881
9.6382	0	520	0	530	0	525	0	535	0	535	0	535	0	535	0	535	0	525	0	535	0	535	0	535	0	0	531.538	1.43051	0.4815	-31.3147	-30.6271	-23.9079	-27.9707	-19.1888	-23.0953	-18.6263	-28.4707	-31.0959	-23.7829	-24.3142	-28.752	-25.9289	1.27464
9.6482	0	520	0	530	0	525	0	535	0	535	0	535	0	535	0	535	0	525	0	535	0	535	0	535	0	0	531.538	1.43051	0.482	-31.3772	-30.7834	-23.3454	-29.7521	-20.3764	-23.0328	-18.2513	-27.8457	-29.5958	-24.6892	-23.4704	-28.627	-25.9289	1.24525
9.6582	0	520	0	530	0	525	0	535	0	535	0	535	0	535	0	535	0	525	0	535	0	535	0	535	0	0	531.538	1.43051	0.4825	-31.4709	-31.4709	-23.0953	-29.7521	-20.7202	-22.7516	-18.9076	-28.0957	-29.5645	-24.6267	-26.0643	-30.0333	-26.3794	1.2451
9.6682	0	520	0	530	0	525	0	535	0	535	0	535	0	535	0	535	0	525	0	535	0	535	0	535	0	0	531.538	1.43051	0.483	-31.6897	-30.4083	-23.8454	-30.9709	-20.6889	-22.7516	-18.2513	-28.2832	-30.7521	-25.6893	-24.0329	-29.8458	-26.4341	1.30341
9.6782	0	520	0	530	0	525	0	535	0	535	0	535	0	535	0	535	0	525	0	535	0	535	0	535	0	0	531.538	1.43051	0.4835	-31.1897	-31.1584	-23.3766	-32.3772	-20.3764	-23.0641	-18.5638	-27.5644	-29.5645	-24.4079	-23.6891	-29.4083	-26.2284	1.32188
9.6883	0	520	0	530	0	525	0	535	0	535	0	535	0	535	0	535	0	525	0	535	0	535	0	535	0	0	531.538	1.43051	0.484	-31.2834	-31.4397	-23.3766	-31.1897	-21.0014	-23.0641	-18.5013	-29.0645	-30.3771	-25.7205	-23.8141	-29.4083	-26.5201	1.29957
9.6983	0	520	0	530	0	525	0	535	0	535	0	535	0	535	0	535	0	525	0	535	0	535	0	535	0	0	531.538	1.43051	0.4845	-30.7834	-30.8146	-24.0954	-30.8771	-20.4702	-23.0953	-19.4388	-28.9395	-30.6271	-24.6267	-24.3454	-29.4083	-26.4602	1.22873
9.7083	0	520	0	530	0	525	0	535	0	535	0	535	0	535	0	535	0	525	0	535	0	535	0	535	0	0	531.538	1.43051	0.485	-30.8771	-31.4709	-22.8453	-31.0646	-19.2826	-21.7203	-18.3763	-28.627	-31.1897	-26.3768	-24.8142	-29.4083	-26.3378	1.39401
9.7183	0	520	0	530	0	525	0	535	0	535	0	535	0	535	0	535	0	525	0	535	0	535	0	535	0	0	531.538	1.43051	0.4855	-31.1272	-31.3459	-23.4704	-31.4084	-20.6577	-23.1578	-18.0637	-27.7832	-30.8146	-25.6268	-24.1892	-28.502	-26.3456	1.30478
9.7283	0	520	0	530	0	525	0	535	0	535	0	535	0	535	0	535	0	525	0	535	0	535	0	535	0	0	531.538	1.43051	0.486	-30.7209	-31.0021	-23.1891	-30.8771	-20.1889	-23.5016	-17.0949	-27.5331	-31.2834	-23.9392	-24.9392	-31.5647	-26.3195	1.41337
9.7384	0	520	0	530	0	525	0	535	0	535	0	535	0	535	0	535	0	525	0	535	0	535	0	535	0	0	531.538	1.43051	0.4865	-30.8146	-31.1897	-23.9079	-30.5646	-20.7202	-22.8141	-19.4701	-28.6582	-30.6271	-24.908	-23.1266	-28.877	-26.3065	1.23419
9.7484	0	520	0	530	0	525	0	535	0	535	0	535	0	535	0	535	0	525	0	535	0	535	0	535	0	0	531.538	1.43051	0.487	-30.8146	-31.3147	-23.0641	-31.0959	-20.1576	-22.8766	-18.5638	-28.0957	-30.7521	-24.783	-23.5016	-29.4708	-26.2075	1.3241
9.7584	0	520	0	530	0	525	0	535	0	535	0	535	0	535	0	535	0	525	0	535	0	535	0	535	0	0	531.538	1.43051	0.4875	-30.3146	-31.3459	-23.0953	-29.9708	-20.5639	-21.439	-18.5638	-27.5331	-30.9709	-26.0955	-24.1892	-28.502	-26.0487	1.27217
9.7684	0	520	0	530	0	525	0	535	0	535	0	535	0	535	0	535	0	525	0	535	0	535	0	535	0	0	531.538	1.43051	0.488	-31.4084	-30.7521	-22.5641	-30.0958	-20.3139	-22.0015	-17.0637	-28.1895	-30.7834	-24.5329	-24.0329	-30.0646	-25.9836	1.40023
9.7784	0	520	0	530	0	525	0	535	0	535	0	535	0	535	0	535	0	525	0	535	0	535	0	535	0	0	531.538	1.43051	0.4885	-31.2522	-31.7209	-23.3454	-30.8146	-19.4076	-22.7203	-19.0638	-27.6269	-29.6583	-24.0329	-23.6891	-30.5646	-26.1581	1.34459
9.7885	0	520	0	530	0	525	0	535	0	535	0	535	0	535	0	535	0	525	0	535	0	535	0	535	0	0	531.538	1.43051	0.489	-30.7834	-31.5022	-23.1578	-30.8771	-20.8764	-22.5328	-17.2824	-28.9395	-29.6583	-24.9392	-23.9704	-30.4396	-26.2466	1.36386
9.7985	0	520	0	530	0	525	0	535	0	535	0	535	0	535	0	535	0	525	0	535	0	535	0	535	0	0	531.538	1.43051	0.4895	-30.8459	-31.5334	-22.7516	-31.4397	-20.9389	-23.4079	-17.595	-26.5643	-31.5959	-25.3143	-24.1892	-30.6271	-26.4003	1.38195
9.8085	0	520	0	530	0	525	0	535	0	535	0	535	0	535	0	535	0	525	0	535	0	535	0	535	0	0	531.538	1.43051	0.49	-30.6584	-31.4397	-23.0953	-31.6897	-20.0639	-22.8453	-17.4075	-28.752	-30.0958	-25.9705	-23.3141	-29.8771	-26.2674	1.39496
9.8185	0	520	0	530	0	525	0	535	0	535	0	535	0	535	0	535	0	525	0	535	0	535	0	535	0	0	531.538	1.43051	0.4905	-30.0958	-31.5959	-22.6891	-31.8147	-20.9389	-23.1891	-18.5013	-26.8144	-31.0646	-25.5955	-24.4704	-29.5645	-26.3612	1.2985
9.8285	0	520	0	530	0	525	0	535	0	535	0	535	0	535	0	535	0	525	0	535	0	535	0	535	0	0	531.538	1.43051	0.491	-30.0646	-31.2834	-23.4079	-32.7523	-20.0014	-23.1266	-18.5638	-29.502	-30.6271	-25.033	-24.0329	-29.5333	-26.494	1.36048
9.8386	0	520	0	530	0	525	0	535	0	535	0	535	0	535	0	535	0	525	0	535	0	535	0	535	0	0	531.538	1.43051	0.4915	-30.1271	-31.5647	-23.8767	-33.1585	-21.0014	-23.3141	-19.4076	-27.1581	-31.3147	-25.783	-22.9391	-29.3458	-26.5826	1.30714
9.8486	0	520	0	530	0	525	0	535	0	535	0	535	0	535	0	535	0	525	0	535	0	535	0	535	0	0	531.538	1.43051	0.492	-30.6584	-31.7522	-23.1266	-31.5647	-20.3452	-22.8766	-19.0326	-29.5333	-30.4083	-25.1892	-25.408	-29.9396	-26.6529	1.31316
9.8586	0	520	0	530	0	525	0	535	0	535	0	535	0	535	0	535	0	525	0	535	0	535	0	535	0	0	531.538	1.43051	0.4925	-30.0646	-31.1897	-23.0016	-30.8146	-20.1576	-22.189	-17.9387	-26.9706	-29.9396	-25.0642	-23.5329	-29.127	-25.8325	1.29723
9.8686	0	520	0	530	0	525	0	535	0	535	0	535	0	535	0	535	0	525	0	535	0	535	0	535	0	0	531.538	1.43051	0.493	-30.9709	-31.2522	-23.0328	-30.9709	-20.5952	-23.1891	-18.595	-29.1895	-31.3147	-24.908	-23.9392	-30.3146	-26.5227	1.33981
9.8786	0	520	0	530	0	525	0	535	0	535	0	535	0	535	0	535	0	525	0	535	0	535	0	535	0	0	531.538	1.43051	0.4935	-30.4708	-31.3459	-23.1266	-31.5022	-20.6889	-22.3765	-16.4699	-27.1581	-30.5959	-24.9705	-23.1578	-29.0645	-25.9106	1.40387
9.8886	0	520	0	530	0	525	0	535	0	535	0	535	0	535	0	535	0	525	0	535	0	535	0	535	0	0	531.538	1.43051	0.494	-30.3458	-30.8771	-23.8141	-30.9709	-21.4077	-24.0642	-17.6575	-28.752	-30.8146	-25.0955	-24.3142	-30.4708	-26.5487	1.2833
9.8987	0	520	0	530	0	525	0	535	0	535	0	535	0	535	0	535	0	525	0	535	0	535	0	535	0	0	531.538	1.43051	0.4945	-30.3458	-31.4709	-23.3766	-31.0334	-19.1888	-21.814	-18.4075	-28.0332	-30.3146	-25.1892	-24.5329	-29.0958	-26.0669	1.34188
9.9087	0	520	0	530	0	525	0	535	0	535	0	535	0	535	0	535	0	525	0	535	0	535	0	535	0	0	531.538	1.43051	0.495	-30.4396	-31.6272	-23.5016	-31.9084	-20.9077	-22.5641	-17.7512	-26.3768	-30.5959	-24.7205	-23.8767	-30.6271	-26.2414	1.36634
9.9187	0	520	0	530	0	525	0	535	0	535	0	535	0	535	0	535	0	525	0	535	0	535	0	535	0	0	531.538	1.43051	0.4955	-29.8458	-31.1584	-23.3454	-31.3459	-20.0014	-23.3454	-17.845	-29.127	-31.2522	-23.6266	-25.4393	-30.3771	-26.3924	1.36843
9.9287	0	520	0	530	0	525	0	535	0	535	0	535	0	535	0	535	0	525	0	535	0	535	0	535	0	0	531.538	1.43051	0.496	-29.377	-31.6584	-23.4079	-30.9084	-20.8764	-22.5953	-17.5637	-27.4706	-30.5334	-24.5954	-24.0329	-29.1895	-26.0174	1.29677
9.9387	0	520	0	530	0	525	0	535	0	535	0	535	0	535	0	535	0	525	0	535	0	535	0	535	0	0	531.538	1.43051	0.4965	-30.4708	-31.6272	-23.5641	-31.7834	-20.5952	-24.2517	-18.1575	-29.002	-30.3146	-25.283	-24.4704	-28.9082	-26.5357	1.29189
9.9488	0	520	0	530	0	525	0	535	0	535	0	535	0	535	0	535	0	525	0	535	0	535	0	535	0	0	531.538	1.43051	0.497	-30.1271	-31.1897	-23.4079	-30.8146	-20.6577	-23.6891	-17.0324	-27.1581	-30.5959	-25.658	-23.9392	-30.2833	-26.2127	1.328
9.9588	0	520	0	530	0	525	0	535	0	535	0	535	0	535	0	535	0	525	0	535	0	535	0	535	0	0	531.538	1.43051	0.4975	-30.6896	-31.8459	-24.1579	-31.5959	-20.5327	-22.5641	-18.47	-28.9082	-29.9083	-26.1581	-24.8142	-31.8147	-26.7883	1.35062
9.9688	0	520	0	530	0	525	0	535	0	535	0	535	0	535	0	535	0	525	0	535	0	535	0	535	0	0	531.538	1.43051	0.498	-29.9396	-31.7522	-23.6579	-32.6898	-20.5327	-24.4392	-16.7824	-27.9707	-31.5647	-25.158	-24.1267	-29.3458	-26.4966	1.41271
9.9788	0	520	0	530	0	525	0	535	0	535	0	535	0	535	0	535	0	525	0	535	0	535	0	535	0	0	531.538	1.43051	0.4985	-30.4396	-31.5647	-23.5954	-32.9085	-20.7514	-19.5951	-17.345	-28.752	-30.4708	-25.033	-24.1267	-29.9083	-26.2075	1.4935
9.9888	0	520	0	530	0	525	0	535	0	535	0	535	0	535	0	535	0	525	0	535	0	535	0	535	0	0	531.538	1.43051	0.499	-31.1897	-31.4397	-24.0017	-30.6896	-20.9702	-24.5954	-15.5011	-28.4395	-30.0021	-24.8767	-25.908	-30.5021	-26.5096	1.40453
9.9989	0	520	0	530	0	525	0	535	0	535	0	535	0	535	0	535	0	525	0	535	0	535	0	535	0	0	531.538	1.43051	0.4995	-30.4083	-32.0022	-23.4391	-31.0959	-20.5639	-21.4077	-15.8761	-28.3457	-31.4709	-24.8767	-24.5954	-31.4709	-26.2961	1.52918
10.0089	0	520	0	530	0	525	0	535	0	535	0	535	0	535	0	535	0	525	0	535	0	535	0	535	0	0	531.538	1.43051	0.5	-29.7521	-31.5334	-23.6266	-31.6584	-20.5952	-23.6266	-17.4387	-27.5644	-30.5646	-24.3454	-24.1892	-30.0958	-26.2492	1.3366
10.0189	0	520	0	530	0	525	0	535	0	535	0	535	0	535	0	535	0	525	0	535	0	535	0	535	0	0	531.538	1.43051	0.5005	-30.1583	-31.6272	-23.5954	-30.8459	-20.7827	-24.2829	-16.1886	-28.377	-30.1583	-25.1892	-24.1267	-30.0958	-26.2857	1.36947
10.0289	0	520	0	530	0	525	0	535	0	535	0	535	0	535	0	535	0	525	0	535	0	535	0	535	0	0	531.538	1.43051	0.501	-30.4708	-31.3459	-23.6266	-30.4708	-20.1889	-22.0328	-15.5636	-29.4708	-30.1896	-24.3767	-23.0641	-30.3771	-25.9315	1.48878
10.0389	0	520	0	530	0	525	0	535	0	535	0	535	0	535	0	535	0	525	0	535	0	535	0	535	0	0	531.538	1.43051	0.5015	-30.0958	-32.1897	-23.5954	-31.2834	-20.8764	-23.8141	-16.4074	-28.627	-30.8459	-24.4079	-24.3142	-28.5645	-26.2518	1.38555
10.0489	0	520	0	530	0	525	0	535	0	535	0	535	0	535	0	535	0	525	0	535	0	535	0	535	0	0	531.538	1.43051	0.502	-30.0021	-31.6272	-22.9078	-30.9396	-20.6577	-22.0953	-16.3449	-29.127	-31.7834	-25.0017	-24.9705	-30.7834	-26.3534	1.4702
10.059	0	520	0	530	0	525	0	535	0	535	0	535	0	535	0	535	0	525	0	535	0	535	0	535	0	0	531.538	1.43051	0.5025	-30.6896	-31.9084	-22.9391	-31.6897	-19.5638	-24.1267	-16.0636	-29.0645	-30.7834	-25.4393	-22.7828	-30.8459	-26.3247	1.52619
10.069	0	520	0	530	0	525	0	535	0	535	0	535	0	535	0	535	0	525	0	535	0	535	0	535	0	0	531.538	1.43051	0.503	-30.4708	-30.8146	-23.2829	-30.1271	-20.3452	-22.5016	-14.9385	-26.9081	-30.0021	-25.6893	-22.8766	-29.1895	-25.5955	1.4277
10.079	0	520	0	530	0	525	0	535	0	535	0	535	0	535	0	535	0	525	0	535	0	535	0	535	0	0	531.538	1.43051	0.5035	-30.4396	-31.6584	-23.0953	-31.0959	-20.2827	-22.1265	-15.1885	-28.1895	-31.4084	-25.533	-24.4392	-30.4396	-26.1581	1.5246
10.089	0	520	0	530	0	525	0	535	0	535	0	535	0	535	0	535	0	525	0	535	0	535	0	535	0	0	531.538	1.43051	0.504	-30.5334	-31.4397	-23.3141	-31.6584	-20.7514	-22.4703	-15.6573	-27.5019	-30.6896	-25.1892	-23.9079	-30.3771	-26.1242	1.46837
10.099	0	520	0	530	0	525	0	535	0	535	0	535	0	535	0	535	0	525	0	535	0	535	0	535	0	0	531.538	1.43051	0.5045	-29.5645	-31.8772	-23.8141	-30.3458	-20.5014	-23.8141	-16.4386	-27.9082	-30.3146	-25.2205	-23.7516	-29.6583	-26.1008	1.34425
10.1091	0	520	0	530	0	525	0	535	0	535	0	535	0	535	0	535	0	525	0	535	0	535	0	535	0	0	531.538	1.43051	0.505	-30.4708	-31.6584	-22.9703	-32.1585	-20.0951	-23.3141	-15.3761	-28.0332	-30.9709	-26.1268	-23.0641	-30.3458	-26.2154	1.53216
10.1191	0	520	0	530	0	525	0	535	0	535	0	535	0	535	0	535	0	525	0	535	0	535	0	535	0	0	531.538	1.43051	0.5055	-30.2521	-32.096	-23.8454	-31.1897	-19.5951	-23.0641	-15.8761	-28.5645	-30.8771	-24.4704	-24.1267	-29.7521	-26.1424	1.47965
10.1291	0	520	0	530	0	525	0	535	0	535	0	535	0	535	0	535	0	525	0	535	0	535	0	535	0	0	531.538	1.43051	0.506	-30.0958	-32.0022	-23.5641	-31.0334	-20.1264	-22.5328	-16.1886	-27.5331	-30.5021	-25.8143	-25.7518	-28.502	-26.1372	1.39154
10.1391	0	520	0	530	0	525	0	535	0	535	0	535	0	535	0	535	0	525	0	535	0	535	0	535	0	0	531.538	1.43051	0.5065	-30.0333	-31.5022	-23.3766	-31.0959	-19.9701	-23.5954	-15.0948	-29.002	-30.6896	-24.908	-24.1892	-31.4709	-26.244	1.52044
10.1491	0	520	0	530	0	525	0	535	0	535	0	535	0	535	0	535	0	525	0	535	0	535	0	535	0	0	531.538	1.43051	0.507	-30.1896	-31.6584	-23.1891	-30.4708	-18.7826	-23.9079	-15.1885	-29.002	-30.4396	-25.1892	-24.2204	-30.0021	-26.02	1.50598
10.1592	0	520	0	530	0	525	0	535	0	535	0	535	0	535	0	535	0	525	0	535	0	535	0	535	0	0	531.538	1.43051	0.5075	-30.8146	-31.5334	-23.1891	-28.1582	-18.8451	-22.1265	-14.876	-27.4706	-30.5646	-24.8455	-24.6892	-30.5646	-25.6398	1.51164
10.1692	0	520	0	530	0	525	0	535	0	535	0	535	0	535	0	535	0	525	0	535	0	535	0	535	0	0	531.538	1.43051	0.508	-30.5334	-31.4397	-23.5329	-30.0333	-19.7514	-23.6891	-15.2823	-27.5644	-31.2522	-24.8767	-23.1266	-29.0332	-25.8429	1.45697
10.1792	0	520	0	530	0	525	0	535	0	535	0	535	0	535	0	535	0	525	0	535	0	535	0	535	0	0	531.538	1.43051	0.5085	-30.4708	-31.5022	-22.9078	-30.3146	-19.4076	-22.5953	-14.8135	-28.6895	-31.0959	-25.3143	-23.3454	-29.8458	-25.8586	1.54208
10.1892	0	520	0	530	0	525	0	535	0	535	0	535	0	535	0	535	0	525	0	535	0	535	0	535	0	0	531.538	1.43051	0.509	-30.2833	-31.8459	-22.8141	-30.7521	-20.5327	-23.3141	-15.001	-27.0331	-31.0959	-24.9705	-24.5954	-30.4083	-26.0539	1.48937
10.1992	0	520	0	530	0	525	0	535	0	535	0	535	0	535	0	535	0	525	0	535	0	535	0	535	0	0	531.538	1.43051	0.5095	-30.1896	-31.5022	-23.3766	-32.5022	-19.3763	-22.4703	-15.0948	-29.002	-30.6896	-25.408	-24.8142	-30.7834	-26.2674	1.574
10.2093	0	520	0	530	0	525	0	535	0	535	0	535	0	535	0	535	0	525	0	535	0	535	0	535	0	0	531.538	1.43051	0.51	-30.1896	-31.5647	-23.2829	-31.2834	-19.8451	-22.5641	-15.0635	-28.1895	-30.4708	-25.5018	-23.5329	-30.4083	-25.9914	1.51672
10.2193	0	520	0	530	0	525	0	535	0	535	0	535	0	535	0	535	0	525	0	535	0	535	0	535	0	0	531.538	1.43051	0.5105	-30.1896	-31.3772	-22.6266	-30.0646	-19.0638	-22.9703	-14.126	-28.2832	-30.7521	-24.8455	-24.1267	-30.6896	-25.7596	1.57294
10.2293	0	520	0	530	0	525	0	535	0	535	0	535	0	535	0	535	0	525	0	535	0	535	0	535	0	0	531.538	1.43051	0.511	-30.5646	-31.3772	-23.7516	-32.7835	-19.7826	-23.1578	-14.5635	-28.502	-29.8458	-23.3766	-24.4392	-29.6583	-25.9836	1.56209
10.2393	0	520	0	530	0	525	0	535	0	535	0	535	0	535	0	535	0	525	0	535	0	535	0	535	0	0	531.538	1.43051	0.5115	-30.0333	-31.1897	-23.5016	-33.1585	-19.4076	-23.4391	-14.8448	-27.7519	-31.1897	-24.6892	-25.158	-29.8458	-26.1841	1.56175
10.2493	0	520	0	530	0	525	0	535	0	535	0	535	0	535	0	535	0	525	0	535	0	535	0	535	0	0	531.538	1.43051	0.512	-30.0646	-31.9397	-23.4704	-32.096	-19.4388	-22.6578	-13.1572	-27.0331	-29.4708	-24.2517	-25.1892	-30.5959	-25.7804	1.63274
10.2593	0	520	0	530	0	525	0	535	0	535	0	535	0	535	0	535	0	525	0	535	0	535	0	535	0	0	531.538	1.43051	0.5125	-30.8146	-31.8459	-22.9078	-32.1897	-19.4388	-23.6266	-13.3447	-28.3145	-30.6584	-24.6892	-23.5954	-29.0958	-25.8768	1.64692
10.2694	0	520	0	530	0	525	0	535	0	535	0	535	0	535	0	535	0	525	0	535	0	535	0	535	0	0	531.538	1.43051	0.513	-30.5959	-31.6272	-23.1578	-32.6585	-19.2826	-23.5954	-14.7823	-28.5332	-31.0334	-24.5954	-23.8454	-31.2522	-26.2466	1.62174
10.2794	0	520	0	530	0	525	0	535	0	535	0	535	0	535	0	535	0	525	0	535	0	535	0	535	0	0	531.538	1.43051	0.5135	-30.3771	-31.4397	-23.2829	-30.9709	-19.1576	-22.8453	-13.9385	-26.8769	-30.5959	-25.1267	-23.0016	-31.0334	-25.7205	1.60287
10.2894	0	520	0	530	0	525	0	535	0	535	0	535	0	535	0	535	0	525	0	535	0	535	0	535	0	0	531.538	1.43051	0.514	-31.0334	-31.8772	-22.5641	-30.2521	-19.3451	-23.0953	-12.5009	-28.9082	-30.5959	-24.5017	-23.9704	-30.5334	-25.7648	1.69792
10.2994	0	520	0	530	0	525	0	535	0	535	0	535	0	535	0	535	0	525	0	535	0	535	0	535	0	0	531.538	1.43051	0.5145	-30.1896	-32.0647	-22.8766	-31.5022	-19.1888	-22.5016	-13.7509	-27.9082	-29.6896	-23.4704	-23.7204	-31.1272	-25.6658	1.64416
10.3094	0	520	0	530	0	525	0	535	0	535	0	535	0	535	0	535	0	525	0	535	0	535	0	535	0	0	531.538	1.43051	0.515	-30.6584	-31.971	-23.3141	-31.4709	-19.4701	-22.7828	-13.4384	-28.9395	-30.6584	-24.8455	-23.8454	-30.2521	-25.9705	1.65068
10.3195	0	520	0	530	0	525	0	535	0	535	0	535	0	535	0	535	0	525	0	535	0	535	0	535	0	0	531.538	1.43051	0.5155	-30.0021	-31.5647	-22.5641	-32.846	-19.1576	-23.1891	-14.001	-28.5957	-29.4708	-23.9392	-25.1892	-30.8459	-25.9471	1.63181
10.3295	0	520	0	530	0	525	0	535	0	535	0	535	0	535	0	535	0	525	0	535	0	535	0	535	0	0	531.538	1.43051	0.516	-30.9084	-31.0021	-23.1891	-32.2835	-19.3763	-21.4702	-12.4071	-28.4082	-31.0646	-24.5017	-23.7516	-30.3146	-25.7231	1.74534
10.3395	0	520	0	530	0	525	0	535	0	535	0	535	0	535	0	535	0	525	0	535	0	535	0	535	0	0	531.538	1.43051	0.5165	-30.7521	-31.2834	-22.5328	-31.971	-18.8763	-22.1578	-13.0946	-27.0956	-30.9084	-23.6891	-23.5954	-29.5333	-25.4575	1.68684
10.3495	0	520	0	530	0	525	0	535	0	535	0	535	0	535	0	535	0	525	0	535	0	535	0	535	0	0	531.538	1.43051	0.517	-31.1897	-32.0335	-22.9703	-31.5647	-18.9076	-23.0016	-12.8759	-28.8457	-30.1896	-24.2829	-23.8141	-29.8771	-25.7961	1.70322
10.3595	0	520	0	530	0	525	0	535	0	535	0	535	0	535	0	535	0	525	0	535	0	535	0	535	0	0	531.538	1.43051	0.5175	-31.1272	-30.5334	-23.0016	-32.9085	-19.1888	-22.9703	-13.4072	-27.6894	-31.8459	-23.3766	-23.9392	-31.8147	-25.9836	1.74007
10.3696	0	520	0	530	0	525	0	535	0	535	0	535	0	535	0	535	0	525	0	535	0	535	0	535	0	0	531.538	1.43051	0.518	-31.7522	-31.7209	-22.6578	-32.6272	-19.4701	-23.1891	-11.8446	-29.1895	-31.2209	-24.2829	-24.0954	-29.1583	-25.9341	1.79594
10.3796	0	520	0	530	0	525	0	535	0	535	0	535	0	535	0	535	0	525	0	535	0	535	0	535	0	0	531.538	1.43051	0.5185	-31.2522	-31.4709	-22.3765	-33.9398	-18.345	-22.9078	-11.7821	-28.2832	-30.7834	-24.0329	-23.9392	-30.1896	-25.7752	1.86099
10.3896	0	520	0	530	0	525	0	535	0	535	0	535	0	535	0	535	0	525	0	535	0	535	0	535	0	0	531.538	1.43051	0.519	-30.9709	-31.8459	-23.6266	-31.6584	-19.9389	-21.689	-12.6884	-27.6582	-31.8147	-23.9079	-22.9391	-29.6583	-25.6997	1.72254
10.3996	0	520	0	530	0	525	0	535	0	535	0	535	0	535	0	535	0	525	0	535	0	535	0	535	0	0	531.538	1.43051	0.5195	-30.7521	-31.5022	-23.1891	-31.8147	-19.4701	-22.8141	-12.9384	-30.0333	-31.0021	-23.9704	-22.9078	-28.3457	-25.7283	1.69122
10.4096	0	520	0	530	0	525	0	535	0	535	0	535	0	535	0	535	0	525	0	535	0	535	0	535	0	0	531.538	1.43051	0.52	-30.4396	-31.5959	-22.5328	-31.7209	-20.1889	-23.0953	-13.7822	-27.0644	-30.7209	-25.0642	-24.1267	-27.1894	-25.6268	1.5443
10.4196	0	520	0	530	0	525	0	535	0	535	0	535	0	535	0	535	0	525	0	535	0	535	0	535	0	0	531.538	1.43051	0.5205	-30.5959	-31.1897	-23.4079	-31.0021	-18.5638	-22.3765	-12.4071	-29.5958	-29.8146	-25.3455	-23.9704	-29.3145	-25.632	1.6841
10.4297	0	520	0	530	0	525	0	535	0	535	0	535	0	535	0	535	0	525	0	535	0	535	0	535	0	0	531.538	1.43051	0.521	-30.7209	-31.5959	-23.3141	-31.1272	-19.3138	-22.4703	-11.8446	-27.5019	-30.0646	-23.7829	-22.8141	-29.5958	-25.3455	1.71065
10.4397	0	520	0	530	0	525	0	535	0	535	0	535	0	535	0	535	0	525	0	535	0	535	0	535	0	0	531.538	1.43051	0.5215	-31.0334	-31.5959	-22.7828	-30.9709	-18.8763	-23.4079	-12.6259	-28.9707	-31.1584	-25.2205	-24.0642	-29.8458	-25.8794	1.70216
10.4497	0	520	0	530	0	525	0	535	0	535	0	535	0	535	0	535	0	525	0	535	0	535	0	535	0	0	531.538	1.43051	0.522	-30.6271	-31.6584	-23.1578	-31.5022	-18.7513	-22.1265	-11.157	-27.1894	-30.7834	-25.4705	-23.7829	-29.6583	-25.4887	1.78245
10.4597	0	520	0	530	0	525	0	535	0	535	0	535	0	535	0	535	0	525	0	535	0	535	0	535	0	0	531.538	1.43051	0.5225	-30.8146	-31.5959	-22.8141	-32.1272	-19.5013	-22.9391	-11.8133	-28.877	-30.8459	-24.1579	-23.9079	-27.7519	-25.5955	1.73137
10.4697	0	520	0	530	0	525	0	535	0	535	0	535	0	535	0	535	0	525	0	535	0	535	0	535	0	0	531.538	1.43051	0.523	-30.5021	-31.4709	-23.0641	-30.8771	-19.1888	-22.9703	-11.1883	-27.5019	-30.1896	-24.0017	-25.033	-28.1895	-25.3481	1.70115
10.4798	0	520	0	530	0	525	0	535	0	535	0	535	0	535	0	535	0	525	0	535	0	535	0	535	0	0	531.538	1.43051	0.5235	-30.3771	-31.2834	-23.4391	-31.971	-18.4388	-21.814	-11.1883	-28.3457	-30.5959	-24.7517	-23.7204	-29.002	-25.4106	1.78714
10.4898	0	520	0	530	0	525	0	535	0	535	0	535	0	535	0	535	0	525	0	535	0	535	0	535	0	0	531.538	1.43051	0.524	-31.4709	-31.3772	-23.2516	-31.6584	-19.0326	-24.0017	-8.90687	-28.6895	-30.7521	-24.5329	-23.9079	-30.0333	-25.6346	1.93481
10.4998	0	520	0	530	0	525	0	535	0	535	0	535	0	535	0	535	0	525	0	535	0	535	0	535	0	0	531.538	1.43051	0.5245	-30.9709	-31.971	-22.9703	-32.5022	-19.5013	-21.9078	-10.4695	-28.3145	-30.7521	-24.908	-23.3454	-30.1271	-25.645	1.87426
10.5098	0	520	0	530	0	525	0	535	0	535	0	535	0	535	0	535	0	525	0	535	0	535	0	535	0	0	531.538	1.43051	0.525	-31.3772	-31.7209	-23.5954	-31.1897	-18.3763	-22.5016	-9.93819	-28.3145	-30.1896	-24.5954	-23.4079	-30.5646	-25.4809	1.89077
10.5198	0	520	0	530	0	525	0	535	0	535	0	535	0	535	0	535	0	525	0	535	0	535	0	535	0	0	531.538	1.43051	0.5255	-30.8771	-31.4709	-23.0016	-31.8459	-19.3138	-22.8141	-9.18813	-28.0644	-30.8459	-25.0642	-23.0953	-30.1271	-25.4757	1.91716
10.5299	0	520	0	530	0	525	0	535	0	535	0	535	0	535	0	535	0	525	0	535	0	535	0	535	0	0	531.538	1.43051	0.526	-30.7521	-31.1272	-23.4391	-32.1897	-19.4701	-21.564	-9.06313	-28.1895	-30.4396	-24.0017	-23.7516	-30.6271	-25.3846	1.93323
10.5399	0	520	0	530	0	525	0	535	0	535	0	535	0	535	0	535	0	525	0	535	0	535	0	535	0	0	531.538	1.43051	0.5265	-31.1272	-31.8772	-23.4391	-32.471	-19.7514	-23.9392	-9.18813	-28.627	-31.1897	-23.9704	-23.9079	-29.4708	-25.7466	1.92432
10.5499	0	520	0	530	0	525	0	535	0	535	0	535	0	535	0	535	0	525	0	535	0	535	0	535	0	0	531.538	1.43051	0.527	-31.5959	-31.4709	-23.5016	-33.0023	-19.5013	-22.189	-8.7506	-27.8144	-30.0958	-23.9392	-22.5016	-30.3771	-25.395	1.98887
10.5599	0	520	0	530	0	525	0	535	0	535	0	535	0	535	0	535	0	525	0	535	0	535	0	535	0	0	531.538	1.43051	0.5275	-31.0959	-32.1897	-23.0953	-31.3147	-19.2826	-23.4704	-7.31301	-27.6269	-29.4708	-24.783	-24.1892	-32.8148	-25.5538	2.06925
10.5699	0	520	0	530	0	525	0	535	0	535	0	535	0	535	0	535	0	525	0	535	0	535	0	535	0	0	531.538	1.43051	0.528	-31.3459	-31.7209	-23.4704	-30.3771	-18.8138	-23.8767	-10.6882	-28.1269	-30.4083	-24.1892	-24.0017	-28.5645	-25.4653	1.76636
10.5799	0	520	0	530	0	525	0	535	0	535	0	535	0	535	0	535	0	525	0	535	0	535	0	535	0	0	531.538	1.43051	0.5285	-31.0959	-31.5959	-23.0328	-30.4708	-18.595	-22.4703	-8.46933	-26.4706	-32.3772	-24.5642	-23.6266	-29.4395	-25.184	1.97161
10.59	0	520	0	530	0	525	0	535	0	535	0	535	0	535	0	535	0	525	0	535	0	535	0	535	0	0	531.538	1.43051	0.529	-31.4397	-31.6897	-23.0328	-31.1584	-18.8763	-25.033	-7.78179	-27.9394	-30.4083	-24.0017	-23.5954	-31.0334	-25.4992	2.01558
10.6	0	520	0	530	0	525	0	535	0	535	0	535	0	535	0	535	0	525	0	535	0	535	0	535	0	0	531.538	1.43051	0.5295	-30.4708	-32.0022	-23.5641	-32.0022	-19.9076	-21.6265	-7.81304	-28.5957	-30.8459	-25.3768	-23.6891	-29.1583	-25.421	1.99789
10.61	0	520	0	530	0	525	0	535	0	535	0	535	0	535	0	535	0	525	0	535	0	535	0	535	0	0	531.538	1.43051	0.53	-30.1896	-31.4709	-23.1891	-31.4397	-19.0951	-23.5329	-8.28182	-27.1581	-31.5334	-24.5642	-24.2829	-30.3771	-25.4262	1.95567
10.62	0	520	0	530	0	525	0	535	0	535	0	535	0	535	0	535	0	525	0	535	0	535	0	535	0	0	531.538	1.43051	0.5305	-30.8459	-32.0022	-22.7516	-32.8773	-19.0013	-22.8453	-6.84422	-28.752	-29.6271	-24.2829	-22.3765	-29.8458	-25.171	2.10804
10.63	0	520	0	530	0	525	0	535	0	535	0	535	0	535	0	535	0	525	0	535	0	535	0	535	0	0	531.538	1.43051	0.531	-31.1897	-31.9397	-23.0641	-33.096	-18.7826	-21.939	-8.31307	-27.5957	-31.5647	-24.0954	-24.0954	-29.9708	-25.4705	2.05191
10.6401	0	520	0	530	0	525	0	535	0	535	0	535	0	535	0	535	0	525	0	535	0	535	0	535	0	0	531.538	1.43051	0.5315	-31.5647	-31.8459	-23.1891	-33.8461	-18.4388	-22.314	-6.84422	-27.0019	-30.6584	-23.9079	-23.8454	-31.0334	-25.3741	2.17538
10.6501	0	520	0	530	0	525	0	535	0	535	0	535	0	535	0	535	0	525	0	535	0	535	0	535	0	0	531.538	1.43051	0.532	-31.5959	-31.5334	-23.2829	-32.4397	-18.8451	-22.314	-5.68789	-28.1582	-30.3146	-23.6266	-23.3454	-29.8146	-25.0799	2.18204
10.6601	0	520	0	530	0	525	0	535	0	535	0	535	0	535	0	535	0	525	0	535	0	535	0	535	0	0	531.538	1.43051	0.5325	-30.4708	-31.7834	-23.7829	-32.9398	-17.1262	-22.8453	-5.7504	-27.0644	-30.6896	-23.6891	-25.5018	-29.1583	-25.0668	2.19071
10.6701	0	520	0	530	0	525	0	535	0	535	0	535	0	535	0	535	0	525	0	535	0	535	0	535	0	0	531.538	1.43051	0.533	-30.7521	-31.7834	-23.0016	-32.096	-19.5326	-23.8454	-3.90652	-27.7519	-30.9709	-26.8769	-24.1267	-31.8459	-25.5408	2.30361
10.6801	0	520	0	530	0	525	0	535	0	535	0	535	0	535	0	535	0	525	0	535	0	535	0	535	0	0	531.538	1.43051	0.5335	-30.6896	-31.6897	-23.1266	-32.6272	-18.595	-23.1578	-5.37537	-27.1894	-30.7834	-23.7516	-24.0954	-31.2522	-25.1944	2.21497
10.6902	0	520	0	530	0	525	0	535	0	535	0	535	0	535	0	535	0	525	0	535	0	535	0	535	0	0	531.538	1.43051	0.534	-31.1584	-32.0647	-23.3766	-32.6898	-17.7825	-22.9703	-3.81276	-27.8144	-31.0646	-25.158	-23.4079	-30.4083	-25.1424	2.35324
10.7002	0	520	0	530	0	525	0	535	0	535	0	535	0	535	0	535	0	525	0	535	0	535	0	535	0	0	531.538	1.43051	0.5345	-30.5959	-32.1585	-23.0328	-31.6584	-18.9388	-22.8141	-3.34398	-28.7832	-30.8146	-23.8141	-24.783	-31.8147	-25.2127	2.36248
10.7102	0	520	0	530	0	525	0	535	0	535	0	535	0	535	0	535	0	525	0	535	0	535	0	535	0	0	531.538	1.43051	0.535	-31.1272	-31.6584	-23.1891	-32.4397	-17.595	-22.5641	-3.93777	-27.3456	-31.0646	-23.4079	-23.5954	-28.877	-24.7335	2.31245
10.7202	0	520	0	530	0	525	0	535	0	535	0	535	0	535	0	535	0	525	0	535	0	535	0	535	0	0	531.538	1.43051	0.5355	-30.1271	-31.6897	-23.2203	-31.4084	-17.5637	-24.0642	-1.12508	-27.9394	-30.0646	-24.6579	-23.6891	-30.5646	-24.6762	2.47302
10.7302	0	520	0	530	0	525	0	535	0	535	0	535	0	535	0	535	0	525	0	535	0	535	0	535	0	0	531.538	1.43051	0.536	-31.5959	-31.9397	-24.0017	-32.3147	-17.595	-23.6266	-0.84381	-28.8457	-30.5646	-23.8141	-25.033	-30.1896	-25.0304	2.55321
10.7403	0	520	0	530	0	525	0	535	0	535	0	535	0	535	0	535	0	525	0	535	0	535	0	535	0	0	531.538	1.43051	0.5365	-30.9084	-31.6584	-23.6891	-31.5647	-18.095	-22.6578	-0.15626	-27.0956	-30.5646	-23.3766	-23.6266	-30.1271	-24.46	2.54817
10.7503	0	520	0	530	0	525	0	535	0	535	0	535	0	535	0	535	0	525	0	535	0	535	0	535	0	0	531.538	1.43051	0.537	-31.2834	-31.9084	-23.4391	-30.8771	-19.6576	-22.8453	1.25009	-28.0332	-29.7833	-24.8455	-23.5329	-30.1896	-24.5954	2.61936
10.7603	0	520	0	530	0	525	0	535	0	535	0	535	0	535	0	535	0	525	0	535	0	535	0	535	0	0	531.538	1.43051	0.5375	-31.3772	-31.4709	-23.4391	-33.1898	-18.0637	-23.0016	1.31259	-27.5957	-30.0958	-24.4704	-23.6891	-28.8145	-24.4913	2.67233
10.7703	0	520	0	530	0	525	0	535	0	535	0	535	0	535	0	535	0	525	0	535	0	535	0	535	0	0	531.538	1.43051	0.538	-31.4084	-32.0022	-23.3766	-33.5023	-18.1888	-23.5641	3.15647	-28.1582	-30.0333	-24.9705	-23.0641	-29.4083	-24.5434	2.83679
10.7803	0	520	0	530	0	525	0	535	0	535	0	535	0	535	0	535	0	525	0	535	0	535	0	535	0	0	531.538	1.43051	0.5385	-31.4709	-32.471	-23.4704	-33.4711	-18.5325	-21.6265	4.40655	-27.7207	-30.8771	-24.4392	-24.6892	-30.5334	-24.5746	2.96513
10.7903	0	520	0	530	0	525	0	535	0	535	0	535	0	535	0	535	0	525	0	535	0	535	0	535	0	0	531.538	1.43051	0.539	-31.7522	-31.9084	-23.3141	-32.846	-18.47	-22.8141	5.34412	-28.0332	-31.3459	-23.8454	-23.3141	-28.8457	-24.2621	2.99976
10.8004	0	520	0	530	0	525	0	535	0	535	0	535	0	535	0	535	0	525	0	535	0	535	0	535	0	0	531.538	1.43051	0.5395	-32.1897	-31.6897	-23.1578	-31.1897	-17.7512	-23.7516	7.00048	-27.3769	-31.9397	-24.8455	-24.3142	-30.0958	-24.2751	3.12644
10.8104	0	520	0	530	0	525	0	535	0	535	0	535	0	535	0	535	0	525	0	535	0	535	0	535	0	0	531.538	1.43051	0.54	-32.1897	-31.9397	-23.3766	-30.1896	-18.095	-22.2828	8.81311	-28.1895	-29.9396	-24.8767	-23.5329	-29.7208	-23.7933	3.22086
10.8204	0	520	0	530	0	525	0	535	0	535	0	535	0	535	0	535	0	525	0	535	0	535	0	535	0	0	531.538	1.43051	0.5405	-31.7522	-31.5022	-23.5954	-31.4709	-18.1575	-22.6266	8.46933	-26.8144	-29.0958	-24.8767	-24.8767	-29.0332	-23.7777	3.16563
10.8304	0	520	0	530	0	525	0	535	0	535	0	535	0	535	0	535	0	525	0	535	0	535	0	535	0	0	531.538	1.43051	0.541	-31.971	-31.7209	-23.1891	-31.3459	-17.9075	-22.8453	12.2196	-28.6582	-30.8771	-23.5016	-23.8767	-30.0646	-23.6449	3.51685
10.8404	0	520	0	530	0	525	0	535	0	535	0	535	0	535	0	535	0	525	0	535	0	535	0	535	0	0	531.538	1.43051	0.5415	-32.1897	-31.7209	-23.2516	-30.2833	-18.3138	-22.9078	13.6572	-27.6894	-31.8147	-24.7517	-24.0017	-29.0645	-23.5277	3.60611
10.8505	0	520	0	530	0	525	0	535	0	535	0	535	0	535	0	535	0	525	0	535	0	535	0	535	0	0	531.538	1.43051	0.542	-31.6897	-31.3772	-23.3766	-29.6271	-17.5325	-24.4392	14.8135	-27.9394	-30.4708	-23.8454	-21.9703	-29.6271	-23.0901	3.66947
10.8605	0	520	0	530	0	525	0	535	0	535	0	535	0	535	0	535	0	525	0	535	0	535	0	535	0	0	531.538	1.43051	0.5425	-32.0022	-31.8772	-23.6579	-29.9708	-17.5637	-22.1578	15.8448	-27.1581	-30.1271	-24.6892	-23.7829	-29.0958	-23.0198	3.75051
10.8705	0	520	0	530	0	525	0	535	0	535	0	535	0	535	0	535	0	525	0	535	0	535	0	535	0	0	531.538	1.43051	0.543	-32.1272	-31.9084	-22.6891	-30.6896	-17.3762	-23.1891	18.5638	-27.0956	-30.4083	-24.2517	-23.0328	-30.3771	-22.8818	3.99676
10.8805	0	520	0	530	0	525	0	535	0	535	0	535	0	535	0	535	0	525	0	535	0	535	0	535	0	0	531.538	1.43051	0.5435	-31.6897	-32.0335	-23.5641	-31.5959	-18.0012	-23.1891	20.3452	-28.4395	-30.6896	-23.9704	-24.5954	-29.4083	-23.0693	4.14543
10.8905	0	520	0	530	0	525	0	535	0	535	0	535	0	535	0	535	0	525	0	535	0	535	0	535	0	0	531.538	1.43051	0.544	-32.3147	-31.5647	-23.4079	-32.1272	-17.1262	-22.9078	20.4389	-25.533	-30.3458	-24.3142	-23.8141	-30.3146	-22.7776	4.1567
10.9006	0	520	0	530	0	525	0	535	0	535	0	535	0	535	0	535	0	525	0	535	0	535	0	535	0	0	531.538	1.43051	0.5445	-32.3772	-31.9084	-23.4079	-31.4397	-18.3138	-23.1891	20.1264	-29.252	-30.0333	-24.8767	-23.7829	-29.1583	-23.1344	4.1295
10.9106	0	520	0	530	0	525	0	535	0	535	0	535	0	535	0	535	0	525	0	535	0	535	0	535	0	0	531.538	1.43051	0.545	-32.4085	-31.971	-23.5016	-32.4397	-18.6888	-21.9078	20.8139	-25.9393	-29.4083	-24.9392	-23.2829	-29.9396	-22.8011	4.17335
10.9206	0	520	0	530	0	525	0	535	0	535	0	535	0	535	0	535	0	525	0	535	0	535	0	535	0	0	531.538	1.43051	0.5455	-31.8772	-31.9084	-23.5329	-31.7522	-16.6261	-23.0016	21.4077	-29.502	-30.8146	-24.4392	-23.7829	-29.1895	-22.9182	4.25689
10.9306	0	520	0	530	0	525	0	535	0	535	0	535	0	535	0	535	0	525	0	535	0	535	0	535	0	0	531.538	1.43051	0.546	-32.0647	-32.1897	-23.4391	-30.8771	-18.0012	-22.7203	20.5952	-26.6893	-31.0646	-24.908	-24.3454	-28.9082	-22.8844	4.14995
10.9406	0	520	0	530	0	525	0	535	0	535	0	535	0	535	0	535	0	525	0	535	0	535	0	535	0	0	531.538	1.43051	0.5465	-31.9397	-32.096	-23.5329	-31.3459	-15.6261	-22.7516	22.2515	-28.9395	-28.6895	-25.0955	-23.5954	-29.5958	-22.5797	4.30689
10.9506	0	520	0	530	0	525	0	535	0	535	0	535	0	535	0	535	0	525	0	535	0	535	0	535	0	0	531.538	1.43051	0.547	-31.9397	-31.1897	-23.2829	-31.1897	-17.2824	-23.3766	20.5014	-27.2831	-29.8458	-24.7517	-24.3142	-30.0646	-22.8349	4.1368
10.9607	0	520	0	530	0	525	0	535	0	535	0	535	0	535	0	535	0	525	0	535	0	535	0	535	0	0	531.538	1.43051	0.5475	-32.346	-31.6897	-23.3766	-30.1583	-17.6575	-23.2829	20.3139	-27.9082	-29.4395	-24.5329	-24.1892	-32.0335	-23.025	4.14681
10.9707	0	520	0	530	0	525	0	535	0	535	0	535	0	535	0	535	0	525	0	535	0	535	0	535	0	0	531.538	1.43051	0.548	-32.1272	-31.8147	-23.1891	-31.1897	-16.2824	-22.9078	20.5327	-28.6582	-30.3146	-25.5643	-23.7204	-28.9395	-22.8479	4.17056
10.9807	0	520	0	530	0	525	0	535	0	535	0	535	0	535	0	535	0	525	0	535	0	535	0	535	0	0	531.538	1.43051	0.5485	-32.3772	-31.7209	-23.0641	-30.6584	-17.47	-21.8453	18.345	-27.0956	-28.9395	-24.6892	-23.5329	-29.6583	-22.7255	3.95293
10.9907	0	520	0	530	0	525	0	535	0	535	0	535	0	535	0	535	0	525	0	535	0	535	0	535	0	0	531.538	1.43051	0.549	-31.8459	-31.8459	-22.9391	-31.5959	-16.1886	-22.7516	19.1263	-27.9707	-29.0958	-24.3454	-24.4079	-30.6584	-22.8766	4.05979
11.0007	0	520	0	530	0	525	0	535	0	535	0	535	0	535	0	535	0	525	0	535	0	535	0	535	0	0	531.538	1.43051	0.5495	-31.971	-32.096	-22.9703	-31.3772	-16.3136	-22.4703	18.4388	-28.1582	-30.8146	-23.6266	-23.6266	-30.0021	-22.9156	4.0198
11.0108	0	520	0	530	0	525	0	535	0	535	0	535	0	535	0	535	0	525	0	535	0	535	0	535	0	0	531.538	1.43051	0.55	-31.8772	-31.8147	-22.6578	-31.6897	-16.8137	-22.8141	16.5949	-28.1895	-29.6583	-25.3768	-24.0017	-29.4708	-23.1474	3.85113
11.0208	0	520	0	530	0	525	0	535	0	535	0	535	0	535	0	535	0	525	0	535	0	535	0	535	0	0	531.538	1.43051	0.5505	-32.1897	-31.5647	-22.8453	-31.9397	-17.5325	-23.8454	17.8762	-28.0019	-30.4083	-25.8143	-22.8766	-30.8146	-23.3297	3.97609
11.0308	0	520	0	530	0	525	0	535	0	535	0	535	0	535	0	535	0	525	0	535	0	535	0	535	0	0	531.538	1.43051	0.551	-31.7209	-31.7834	-22.9391	-32.5022	-16.9387	-21.9078	17.4387	-28.4395	-30.9709	-22.8453	-23.3454	-30.8146	-23.0641	3.96099
11.0408	0	520	0	530	0	525	0	535	0	535	0	535	0	535	0	535	0	525	0	535	0	535	0	535	0	0	531.538	1.43051	0.5515	-32.0647	-31.5959	-23.0328	-32.6272	-17.4075	-24.0017	16.8449	-28.3457	-30.0958	-25.8768	-24.0017	-29.8458	-23.5042	3.89314
11.0508	0	520	0	530	0	525	0	535	0	535	0	535	0	535	0	535	0	525	0	535	0	535	0	535	0	0	531.538	1.43051	0.552	-32.5022	-31.8772	-22.6578	-33.5023	-16.2824	-22.3453	14.0322	-29.002	-30.1271	-23.5016	-24.1267	-30.4083	-23.5251	3.72986
11.0609	0	520	0	530	0	525	0	535	0	535	0	535	0	535	0	535	0	525	0	535	0	535	0	535	0	0	531.538	1.43051	0.5525	-32.1897	-31.5334	-23.4704	-33.096	-16.8762	-23.7516	15.3761	-27.0019	-29.4395	-24.8142	-25.4705	-30.5646	-23.5693	3.78436
11.0709	0	520	0	530	0	525	0	535	0	535	0	535	0	535	0	535	0	525	0	535	0	535	0	535	0	0	531.538	1.43051	0.553	-32.1585	-32.1585	-22.6578	-32.0335	-16.7824	-23.3766	13.7509	-27.8769	-30.0021	-24.5017	-21.7828	-31.4397	-23.4183	3.6769
11.0809	0	520	0	530	0	525	0	535	0	535	0	535	0	535	0	535	0	525	0	535	0	535	0	535	0	0	531.538	1.43051	0.5535	-32.2835	-31.6897	-23.0953	-31.6584	-15.7823	-22.0953	11.2508	-28.502	-30.9084	-25.158	-24.1892	-30.9084	-23.7516	3.50038
11.0909	0	520	0	530	0	525	0	535	0	535	0	535	0	535	0	535	0	525	0	535	0	535	0	535	0	0	531.538	1.43051	0.554	-32.6585	-31.9084	-23.1266	-30.9709	-16.7824	-24.1267	12.6884	-28.3457	-30.4708	-25.658	-24.1267	-30.7209	-23.8506	3.58177
11.1009	0	520	0	530	0	525	0	535	0	535	0	535	0	535	0	535	0	525	0	535	0	535	0	535	0	0	531.538	1.43051	0.5545	-31.9397	-32.0022	-23.1891	-31.2522	-17.345	-21.0639	12.7196	-29.4395	-29.9708	-24.6579	-24.8767	-30.5959	-23.6344	3.57804
11.111	0	520	0	530	0	525	0	535	0	535	0	535	0	535	0	535	0	525	0	535	0	535	0	535	0	0	531.538	1.43051	0.555	-32.4085	-32.3147	-23.5641	-31.4709	-17.4075	-23.7204	11.9383	-28.1895	-29.377	-24.7517	-23.6579	-30.1896	-23.7595	3.4986
11.121	0	520	0	530	0	525	0	535	0	535	0	535	0	535	0	535	0	525	0	535	0	535	0	535	0	0	531.538	1.43051	0.5555	-32.9398	-32.1897	-23.5016	-32.0022	-17.9387	-23.1266	9.50066	-28.1895	-28.8457	-24.0954	-23.2829	-29.8458	-23.8714	3.31045
11.131	0	520	0	530	0	525	0	535	0	535	0	535	0	535	0	535	0	525	0	535	0	535	0	535	0	0	531.538	1.43051	0.556	-32.471	-32.0335	-23.3454	-31.7522	-15.7823	-23.5016	9.65692	-27.5644	-30.4396	-25.3143	-24.3454	-30.5959	-23.9574	3.3675
11.141	0	520	0	530	0	525	0	535	0	535	0	535	0	535	0	535	0	525	0	535	0	535	0	535	0	0	531.538	1.43051	0.5565	-32.5022	-32.1897	-22.6578	-33.9398	-16.2824	-23.6579	9.37565	-28.4082	-28.9707	-25.658	-23.1266	-30.8146	-24.0694	3.37954
11.151	0	520	0	530	0	525	0	535	0	535	0	535	0	535	0	535	0	525	0	535	0	535	0	535	0	0	531.538	1.43051	0.557	-32.6272	-31.1897	-23.6266	-33.1898	-16.3449	-21.8453	7.68803	-28.4395	-28.627	-24.0954	-23.6579	-29.0958	-23.7542	3.19158
11.161	0	520	0	530	0	525	0	535	0	535	0	535	0	535	0	535	0	525	0	535	0	535	0	535	0	0	531.538	1.43051	0.5575	-32.846	-31.6897	-22.9703	-31.5959	-15.9073	-24.908	9.4069	-28.3145	-29.6896	-25.5018	-24.4392	-30.7521	-24.1006	3.34549
11.1711	0	520	0	530	0	525	0	535	0	535	0	535	0	535	0	535	0	525	0	535	0	535	0	535	0	0	531.538	1.43051	0.558	-32.6898	-31.2834	-23.6266	-33.096	-16.5011	-22.5328	7.81304	-28.1895	-31.0646	-24.0017	-22.4391	-30.4396	-24.0043	3.24884
11.1811	0	520	0	530	0	525	0	535	0	535	0	535	0	535	0	535	0	525	0	535	0	535	0	535	0	0	531.538	1.43051	0.5585	-32.3772	-31.8147	-23.4079	-33.8773	-16.4699	-23.1891	5.8129	-29.0645	-29.6271	-25.7205	-25.3768	-29.8146	-24.5772	3.09852
11.1911	0	520	0	530	0	525	0	535	0	535	0	535	0	535	0	535	0	525	0	535	0	535	0	535	0	0	531.538	1.43051	0.559	-32.1897	-31.7209	-23.2829	-33.1273	-16.6261	-22.9391	6.31294	-27.0956	-29.7833	-25.5018	-24.1892	-29.5958	-24.1449	3.09112
11.2011	0	520	0	530	0	525	0	535	0	535	0	535	0	535	0	535	0	525	0	535	0	535	0	535	0	0	531.538	1.43051	0.5595	-32.1897	-31.5647	-23.0953	-31.4084	-16.6886	-23.0328	3.40649	-28.1269	-30.1583	-23.8454	-24.1892	-28.4395	-24.111	2.83389
11.2111	0	520	0	530	0	525	0	535	0	535	0	535	0	535	0	535	0	525	0	535	0	535	0	535	0	0	531.538	1.43051	0.56	-32.4397	-31.9084	-22.9391	-31.5959	-14.626	-22.9703	3.37523	-27.5019	-29.8458	-24.4392	-25.3143	-29.127	-24.111	2.89386
11.2212	0	520	0	530	0	525	0	535	0	535	0	535	0	535	0	535	0	525	0	535	0	535	0	535	0	0	531.538	1.43051	0.5605	-32.2835	-31.8772	-22.7828	-29.9708	-15.8761	-22.314	2.81269	-27.7207	-31.0646	-25.3768	-24.3454	-28.377	-24.098	2.80742
11.2312	0	520	0	530	0	525	0	535	0	535	0	535	0	535	0	535	0	525	0	535	0	535	0	535	0	0	531.538	1.43051	0.561	-31.9397	-31.3459	-22.7203	-31.8147	-16.0949	-23.0016	2.81269	-27.1269	-30.1583	-25.408	-24.3142	-28.6895	-24.1501	2.7983
11.2412	0	520	0	530	0	525	0	535	0	535	0	535	0	535	0	535	0	525	0	535	0	535	0	535	0	0	531.538	1.43051	0.5615	-32.2835	-31.7522	-22.5016	-31.2834	-15.9073	-22.9391	-0.15626	-28.4082	-30.8146	-25.3768	-24.5954	-29.7833	-24.6501	2.63376
11.2512	0	520	0	530	0	525	0	535	0	535	0	535	0	535	0	535	0	525	0	535	0	535	0	535	0	0	531.538	1.43051	0.562	-32.1897	-31.6584	-23.0016	-32.3772	-16.8137	-22.8141	-1.81263	-27.9082	-30.3146	-25.3768	-25.6893	-29.377	-24.9444	2.49292
11.2612	0	520	0	530	0	525	0	535	0	535	0	535	0	535	0	535	0	525	0	535	0	535	0	535	0	0	531.538	1.43051	0.5625	-32.471	-31.3147	-22.9391	-30.1896	-16.6886	-23.0953	-2.90645	-27.7832	-29.7833	-25.3768	-24.3454	-30.5959	-24.7908	2.38316
11.2713	0	520	0	530	0	525	0	535	0	535	0	535	0	535	0	535	0	525	0	535	0	535	0	535	0	0	531.538	1.43051	0.563	-32.0022	-31.7834	-23.4704	-31.1584	-15.9698	-23.2516	-4.34405	-28.3457	-30.0958	-25.7205	-24.6267	-28.1582	-24.9106	2.2934
11.2813	0	520	0	530	0	525	0	535	0	535	0	535	0	535	0	535	0	525	0	535	0	535	0	535	0	0	531.538	1.43051	0.5635	-31.7522	-31.5334	-23.1578	-32.471	-15.7198	-22.6891	-5.15661	-27.8769	-30.5021	-24.8142	-24.0329	-29.8146	-24.9601	2.29523
11.2913	0	520	0	530	0	525	0	535	0	535	0	535	0	535	0	535	0	525	0	535	0	535	0	535	0	0	531.538	1.43051	0.564	-30.8771	-31.1897	-23.0953	-31.7834	-15.5948	-22.9078	-6.4692	-28.502	-30.9396	-23.8141	-23.4079	-29.3458	-24.8272	2.18246
11.3013	0	520	0	530	0	525	0	535	0	535	0	535	0	535	0	535	0	525	0	535	0	535	0	535	0	0	531.538	1.43051	0.5645	-32.1897	-31.7209	-22.6891	-32.1272	-16.1886	-22.5641	-6.31294	-27.8144	-29.9083	-24.7517	-24.2517	-29.4083	-24.9939	2.19822
11.3113	0	520	0	530	0	525	0	535	0	535	0	535	0	535	0	535	0	525	0	535	0	535	0	535	0	0	531.538	1.43051	0.565	-31.8772	-31.1584	-23.0953	-32.0647	-16.4699	-23.1266	-9.53191	-28.7832	-29.2833	-26.3143	-24.1579	-29.252	-25.4262	1.95651
11.3213	0	520	0	530	0	525	0	535	0	535	0	535	0	535	0	535	0	525	0	535	0	535	0	535	0	0	531.538	1.43051	0.5655	-31.6272	-31.4397	-22.7516	-31.2834	-16.0324	-23.5329	-10.5945	-27.9707	-30.5646	-24.0642	-24.908	-29.1895	-25.3299	1.90083
11.3314	0	520	0	530	0	525	0	535	0	535	0	535	0	535	0	535	0	525	0	535	0	535	0	535	0	0	531.538	1.43051	0.566	-31.6584	-31.5022	-21.6265	-31.8147	-16.2511	-22.7828	-11.6883	-28.1895	-29.3458	-25.3143	-24.1892	-28.4082	-25.2309	1.83378
11.3414	0	520	0	530	0	525	0	535	0	535	0	535	0	535	0	535	0	525	0	535	0	535	0	535	0	0	531.538	1.43051	0.5665	-31.6897	-31.4709	-22.8453	-31.3459	-17.0949	-24.1892	-14.751	-28.5645	-29.8146	-25.283	-24.0329	-29.1895	-25.856	1.61758
11.3514	0	520	0	530	0	525	0	535	0	535	0	535	0	535	0	535	0	525	0	535	0	535	0	535	0	0	531.538	1.43051	0.567	-32.0647	-31.1897	-22.7516	-32.1897	-15.8136	-22.064	-14.3135	-27.6269	-29.7208	-24.8767	-24.783	-28.0957	-25.4575	1.71557
11.3614	0	520	0	530	0	525	0	535	0	535	0	535	0	535	0	535	0	525	0	535	0	535	0	535	0	0	531.538	1.43051	0.5675	-32.1272	-30.8771	-22.8766	-31.3772	-14.8135	-23.0953	-15.5948	-28.5645	-30.5334	-24.7517	-22.5953	-27.7519	-25.4132	1.69906
11.3714	0	520	0	530	0	525	0	535	0	535	0	535	0	535	0	535	0	525	0	535	0	535	0	535	0	0	531.538	1.43051	0.568	-31.4397	-31.5334	-22.7516	-30.6271	-15.6886	-22.7828	-15.9073	-26.2831	-29.002	-25.3143	-23.1578	-30.1896	-25.3898	1.60829
11.3815	0	520	0	530	0	525	0	535	0	535	0	535	0	535	0	535	0	525	0	535	0	535	0	535	0	0	531.538	1.43051	0.5685	-31.7834	-31.4709	-23.0641	-31.3459	-16.1886	-22.9391	-15.7198	-29.5958	-29.7833	-25.0955	-24.0017	-28.9082	-25.8247	1.63308
11.3915	0	520	0	530	0	525	0	535	0	535	0	535	0	535	0	535	0	525	0	535	0	535	0	535	0	0	531.538	1.43051	0.569	-31.1584	-31.5959	-23.1578	-30.1896	-15.9386	-24.5642	-17.8762	-25.5955	-30.7521	-25.533	-25.4393	-27.6582	-25.7882	1.4521
11.4015	0	520	0	530	0	525	0	535	0	535	0	535	0	535	0	535	0	525	0	535	0	535	0	535	0	0	531.538	1.43051	0.5695	-31.7209	-31.4397	-23.1891	-31.4709	-16.5011	-23.1891	-18.345	-30.0958	-30.4708	-25.0017	-23.9392	-29.9396	-26.2753	1.5411
11.4115	0	520	0	530	0	525	0	535	0	535	0	535	0	535	0	535	0	525	0	535	0	535	0	535	0	0	531.538	1.43051	0.57	-31.4709	-32.1897	-22.8766	-31.5647	-16.1886	-23.6266	-19.4701	-26.3456	-30.8146	-24.4704	-24.3454	-29.0958	-26.0383	1.4859
11.4215	0	520	0	530	0	525	0	535	0	535	0	535	0	535	0	535	0	525	0	535	0	535	0	535	0	0	531.538	1.43051	0.5705	-31.5334	-31.4709	-22.8141	-31.7522	-14.751	-23.1578	-18.0637	-29.1895	-30.0646	-24.908	-24.4704	-29.4083	-25.9653	1.61249
11.4316	0	520	0	530	0	525	0	535	0	535	0	535	0	535	0	535	0	525	0	535	0	535	0	535	0	0	531.538	1.43051	0.571	-31.5334	-31.6897	-22.7516	-31.7834	-14.9073	-23.3141	-19.7201	-28.1269	-29.1895	-24.6267	-24.2517	-29.4083	-25.9419	1.52729
11.4416	0	520	0	530	0	525	0	535	0	535	0	535	0	535	0	535	0	525	0	535	0	535	0	535	0	0	531.538	1.43051	0.5715	-31.2834	-31.5959	-23.1578	-32.7835	-15.3761	-23.8454	-20.5014	-27.7832	-29.9396	-26.1268	-24.3142	-29.9708	-26.3898	1.49891
11.4516	0	520	0	530	0	525	0	535	0	535	0	535	0	535	0	535	0	525	0	535	0	535	0	535	0	0	531.538	1.43051	0.572	-30.7521	-31.5022	-22.8766	-33.9398	-14.8135	-23.0328	-20.1889	-27.9082	-29.5958	-24.5642	-24.6579	-29.3145	-26.0956	1.56833
11.4616	0	520	0	530	0	525	0	535	0	535	0	535	0	535	0	535	0	525	0	535	0	535	0	535	0	0	531.538	1.43051	0.5725	-30.9396	-31.6584	-23.0953	-32.9085	-15.5323	-22.7828	-20.0326	-27.6894	-29.9396	-22.7828	-24.6892	-30.8771	-26.0773	1.56252
11.4716	0	520	0	530	0	525	0	535	0	535	0	535	0	535	0	535	0	525	0	535	0	535	0	535	0	0	531.538	1.43051	0.573	-31.2834	-31.5022	-23.0641	-32.1897	-15.5948	-23.3141	-20.5639	-27.7832	-30.0958	-23.6266	-23.6891	-28.502	-25.9341	1.47527
11.4816	0	520	0	530	0	525	0	535	0	535	0	535	0	535	0	535	0	525	0	535	0	535	0	535	0	0	531.538	1.43051	0.5735	-31.0959	-30.8771	-22.6891	-32.1585	-16.0949	-23.4704	-20.6264	-27.6582	-29.5645	-23.5954	-24.1579	-28.6895	-25.8898	1.41354
11.4917	0	520	0	530	0	525	0	535	0	535	0	535	0	535	0	535	0	525	0	535	0	535	0	535	0	0	531.538	1.43051	0.574	-30.6271	-31.1584	-23.1891	-31.7834	-15.8136	-22.5953	-21.689	-28.5332	-29.4395	-24.3767	-24.4392	-29.6896	-26.1112	1.40371
11.5017	0	520	0	530	0	525	0	535	0	535	0	535	0	535	0	535	0	525	0	535	0	535	0	535	0	0	531.538	1.43051	0.5745	-31.1584	-30.9709	-23.1891	-31.5959	-14.6573	-23.3141	-21.1265	-27.9394	-27.4081	-25.9705	-22.189	-28.1582	-25.6398	1.4395
11.5117	0	520	0	530	0	525	0	535	0	535	0	535	0	535	0	535	0	525	0	535	0	535	0	535	0	0	531.538	1.43051	0.575	-31.7522	-30.6584	-22.7828	-32.0647	-16.0636	-23.8767	-21.8765	-28.1895	-29.5958	-25.3455	-24.3454	-29.6583	-26.3508	1.38979
11.5217	0	520	0	530	0	525	0	535	0	535	0	535	0	535	0	535	0	525	0	535	0	535	0	535	0	0	531.538	1.43051	0.5755	-30.4396	-31.6584	-23.1891	-32.7523	-15.0323	-23.4704	-22.189	-28.4395	-30.5959	-25.533	-25.0955	-30.1896	-26.5487	1.47834
11.5317	0	520	0	530	0	525	0	535	0	535	0	535	0	535	0	535	0	525	0	535	0	535	0	535	0	0	531.538	1.43051	0.576	-30.1896	-31.5959	-23.6579	-32.1272	-15.4386	-23.5641	-23.0953	-28.377	-29.5645	-25.283	-24.1267	-28.8457	-26.3221	1.36804
11.5418	0	520	0	530	0	525	0	535	0	535	0	535	0	535	0	535	0	525	0	535	0	535	0	535	0	0	531.538	1.43051	0.5765	-30.8146	-31.6272	-23.0328	-32.6272	-15.5323	-23.4704	-22.8453	-28.0957	-30.1583	-24.908	-23.3454	-29.1583	-26.3013	1.43628
11.5518	0	520	0	530	0	525	0	535	0	535	0	535	0	535	0	535	0	525	0	535	0	535	0	535	0	0	531.538	1.43051	0.577	-30.9709	-31.5959	-23.4704	-32.3147	-14.9385	-23.8141	-22.1578	-28.1269	-29.8146	-25.3768	-23.7204	-29.4083	-26.3091	1.45468
11.5618	0	520	0	530	0	525	0	535	0	535	0	535	0	535	0	535	0	525	0	535	0	535	0	535	0	0	531.538	1.43051	0.5775	-31.0959	-31.5959	-23.3454	-31.5959	-16.0324	-24.8142	-23.3454	-28.0957	-29.6583	-24.4079	-24.3454	-27.5957	-26.3273	1.31356
11.5718	0	520	0	530	0	525	0	535	0	535	0	535	0	535	0	535	0	525	0	535	0	535	0	535	0	0	531.538	1.43051	0.578	-31.0959	-31.5647	-23.6891	-34.2836	-15.001	-20.9077	-23.2829	-27.8769	-30.1583	-24.5329	-24.0642	-28.3145	-26.231	1.54874
11.5818	0	520	0	530	0	525	0	535	0	535	0	535	0	535	0	535	0	525	0	535	0	535	0	535	0	0	531.538	1.43051	0.5785	-31.5959	-31.3459	-23.2829	-32.721	-15.4073	-23.8454	-22.3453	-28.0957	-29.4395	-24.6892	-24.9705	-27.5957	-26.2779	1.41226
11.5919	0	520	0	530	0	525	0	535	0	535	0	535	0	535	0	535	0	525	0	535	0	535	0	535	0	0	531.538	1.43051	0.579	-30.6271	-31.9084	-23.1266	-33.6273	-14.1572	-21.564	-22.0953	-28.1582	-30.0333	-25.4705	-24.2829	-29.4083	-26.2049	1.58877
11.6019	0	520	0	530	0	525	0	535	0	535	0	535	0	535	0	535	0	525	0	535	0	535	0	535	0	0	531.538	1.43051	0.5795	-30.9084	-31.1897	-23.0016	-32.8773	-14.8135	-24.1892	-19.5326	-28.6895	-30.5021	-25.0955	-24.908	-31.6897	-26.4497	1.59785
11.6119	0	520	0	530	0	525	0	535	0	535	0	535	0	535	0	535	0	525	0	535	0	535	0	535	0	0	531.538	1.43051	0.58	-31.2834	-31.4709	-23.7516	-33.1585	-16.1886	-22.1578	-23.1266	-28.0332	-29.502	-25.783	-23.4079	-29.5645	-26.4523	1.42181
11.6219	0	520	0	530	0	525	0	535	0	535	0	535	0	535	0	535	0	525	0	535	0	535	0	535	0	0	531.538	1.43051	0.5805	-30.6896	-31.5647	-23.3454	-33.1898	-14.5948	-22.7516	-23.0641	-27.8144	-29.9708	-24.1892	-24.3767	-28.7832	-26.1945	1.49041
11.6319	0	520	0	530	0	525	0	535	0	535	0	535	0	535	0	535	0	525	0	535	0	535	0	535	0	0	531.538	1.43051	0.581	-30.6584	-31.4084	-23.2829	-32.5335	-15.6573	-23.3141	-23.8454	-27.8769	-30.0958	-24.5954	-24.1267	-29.127	-26.3768	1.38636
11.642	0	520	0	530	0	525	0	535	0	535	0	535	0	535	0	535	0	525	0	535	0	535	0	535	0	0	531.538	1.43051	0.5815	-31.0334	-31.8772	-23.5329	-31.4709	-15.1885	-21.5327	-23.9079	-28.5332	-29.5645	-24.3767	-23.6579	-28.7832	-26.1216	1.43529
11.652	0	520	0	530	0	525	0	535	0	535	0	535	0	535	0	535	0	525	0	535	0	535	0	535	0	0	531.538	1.43051	0.582	-30.1896	-31.7834	-23.6266	-32.1585	-15.126	-24.8142	-23.3141	-27.9394	-30.0958	-24.2829	-23.3141	-28.0957	-26.2284	1.39232
11.662	0	520	0	530	0	525	0	535	0	535	0	535	0	535	0	535	0	525	0	535	0	535	0	535	0	0	531.538	1.43051	0.5825	-31.2209	-31.5959	-23.1891	-29.9083	-14.7198	-22.314	-22.5016	-27.5331	-30.0333	-25.1892	-23.9079	-27.7832	-25.8247	1.40691
11.672	0	520	0	530	0	525	0	535	0	535	0	535	0	535	0	535	0	525	0	535	0	535	0	535	0	0	531.538	1.43051	0.583	-30.7834	-31.4084	-22.6266	-31.2209	-15.7511	-24.5954	-24.1267	-27.6582	-29.6583	-25.5643	-24.8455	-28.6582	-26.4081	1.30272
11.682	0	520	0	530	0	525	0	535	0	535	0	535	0	535	0	535	0	525	0	535	0	535	0	535	0	0	531.538	1.43051	0.5835	-31.8147	-31.4084	-23.4079	-32.2835	-15.1573	-22.6891	-24.6892	-27.7519	-30.0646	-26.033	-23.8454	-29.2833	-26.5357	1.43304
11.692	0	520	0	530	0	525	0	535	0	535	0	535	0	535	0	535	0	525	0	535	0	535	0	535	0	0	531.538	1.43051	0.584	-31.5334	-31.5334	-23.5954	-32.5335	-15.4073	-22.8766	-23.6891	-28.1895	-30.6584	-26.1893	-25.158	-28.377	-26.6451	1.41663
11.7021	0	520	0	530	0	525	0	535	0	535	0	535	0	535	0	535	0	525	0	535	0	535	0	535	0	0	531.538	1.43051	0.5845	-31.2834	-31.3459	-23.3766	-32.971	-15.7198	-23.3454	-23.1578	-28.0019	-29.127	-25.1267	-23.9392	-29.3145	-26.3924	1.40538
11.7121	0	520	0	530	0	525	0	535	0	535	0	535	0	535	0	535	0	525	0	535	0	535	0	535	0	0	531.538	1.43051	0.585	-29.9083	-31.9397	-23.4704	-31.7522	-15.0948	-23.0328	-24.8767	-27.9394	-29.127	-24.3454	-25.0955	-29.8146	-26.3664	1.37363
11.7221	0	520	0	530	0	525	0	535	0	535	0	535	0	535	0	535	0	525	0	535	0	535	0	535	0	0	531.538	1.43051	0.5855	-30.7209	-31.9397	-23.2829	-32.6585	-14.8448	-22.8766	-23.3766	-27.5019	-29.0332	-26.033	-22.8453	-29.7833	-26.2414	1.47038
11.7321	0	520	0	530	0	525	0	535	0	535	0	535	0	535	0	535	0	525	0	535	0	535	0	535	0	0	531.538	1.43051	0.586	-30.5646	-31.5959	-23.3454	-31.8459	-14.251	-24.5329	-23.0953	-27.7832	-29.4395	-24.0954	-23.0641	-29.1583	-26.0643	1.45431
11.7421	0	520	0	530	0	525	0	535	0	535	0	535	0	535	0	535	0	525	0	535	0	535	0	535	0	0	531.538	1.43051	0.5865	-30.5959	-31.1272	-23.5329	-31.4709	-14.1572	-23.3766	-23.5641	-27.4394	-30.6584	-25.783	-24.3767	-30.5334	-26.3846	1.46092
11.7522	0	520	0	530	0	525	0	535	0	535	0	535	0	535	0	535	0	525	0	535	0	535	0	535	0	0	531.538	1.43051	0.587	-30.5021	-31.5647	-23.1891	-34.3774	-15.5636	-22.0328	-23.7829	-28.0644	-29.5333	-25.8768	-23.8454	-29.8771	-26.5175	1.4876
11.7622	0	520	0	530	0	525	0	535	0	535	0	535	0	535	0	535	0	525	0	535	0	535	0	535	0	0	531.538	1.43051	0.5875	-30.7209	-31.1897	-23.0328	-32.7523	-14.9073	-22.5953	-23.6891	-28.627	-30.0646	-24.7205	-24.5954	-29.3145	-26.3508	1.4568
11.7722	0	520	0	530	0	525	0	535	0	535	0	535	0	535	0	535	0	525	0	535	0	535	0	535	0	0	531.538	1.43051	0.588	-30.0646	-31.6272	-23.0641	-32.1897	-14.9698	-23.4704	-23.6579	-27.7832	-31.5959	-24.5017	-23.1891	-29.7521	-26.3221	1.47232
11.7822	0	520	0	530	0	525	0	535	0	535	0	535	0	535	0	535	0	525	0	535	0	535	0	535	0	0	531.538	1.43051	0.5885	-30.5334	-31.5959	-23.6266	-30.3146	-14.876	-23.3141	-23.0953	-26.8144	-29.4395	-25.0017	-24.4079	-30.0021	-26.0851	1.3692
11.7922	0	520	0	530	0	525	0	535	0	535	0	535	0	535	0	535	0	525	0	535	0	535	0	535	0	0	531.538	1.43051	0.589	-30.8146	-31.9084	-23.1578	-31.0334	-14.1885	-23.5016	-23.6579	-27.6894	-29.1895	-24.8767	-23.5954	-28.8457	-26.0383	1.43256
11.8023	0	520	0	530	0	525	0	535	0	535	0	535	0	535	0	535	0	525	0	535	0	535	0	535	0	0	531.538	1.43051	0.5895	-30.6896	-31.9084	-23.5954	-30.6584	-14.7823	-23.8767	-24.0954	-26.8144	-30.1896	-24.9392	-26.033	-29.8146	-26.4497	1.37572
11.8123	0	520	0	530	0	525	0	535	0	535	0	535	0	535	0	535	0	525	0	535	0	535	0	535	0	0	531.538	1.43051	0.59	-30.5646	-31.6584	-23.0641	-31.0646	-15.9386	-23.4079	-24.2517	-28.4707	-30.8146	-24.6267	-24.1267	-30.0333	-26.5018	1.36531
11.8223	0	520	0	530	0	525	0	535	0	535	0	535	0	535	0	535	0	525	0	535	0	535	0	535	0	0	531.538	1.43051	0.5905	-30.0958	-31.5959	-23.3454	-31.8772	-15.4073	-22.8453	-24.5642	-26.7519	-30.4708	-24.5954	-24.5329	-28.6895	-26.231	1.36284
11.8323	0	520	0	530	0	525	0	535	0	535	0	535	0	535	0	535	0	525	0	535	0	535	0	535	0	0	531.538	1.43051	0.591	-30.6584	-32.0022	-22.9391	-32.1272	-15.001	-23.4391	-23.0641	-27.6894	-29.1583	-24.6579	-24.5954	-29.4083	-26.2284	1.42592
11.8423	0	520	0	530	0	525	0	535	0	535	0	535	0	535	0	535	0	525	0	535	0	535	0	535	0	0	531.538	1.43051	0.5915	-30.1896	-31.9397	-23.3766	-31.6897	-15.4386	-22.4078	-24.1579	-28.8145	-29.8771	-24.6579	-23.9392	-29.2833	-26.3143	1.39947
11.8523	0	520	0	530	0	525	0	535	0	535	0	535	0	535	0	535	0	525	0	535	0	535	0	535	0	0	531.538	1.43051	0.592	-30.8146	-31.971	-23.1578	-33.4086	-14.9385	-23.0641	-23.0641	-28.377	-30.3458	-25.1892	-24.3767	-28.7832	-26.4576	1.49356
11.8624	0	520	0	530	0	525	0	535	0	535	0	535	0	535	0	535	0	525	0	535	0	535	0	535	0	0	531.538	1.43051	0.5925	-30.5959	-31.5647	-23.1891	-33.4398	-15.0323	-23.1891	-25.1892	-27.7519	-30.3458	-24.8767	-23.3454	-30.2521	-26.5643	1.47892
11.8724	0	520	0	530	0	525	0	535	0	535	0	535	0	535	0	535	0	525	0	535	0	535	0	535	0	0	531.538	1.43051	0.593	-31.0021	-32.346	-23.5954	-33.6898	-15.0323	-23.3454	-23.4391	-27.3144	-30.0333	-24.0642	-24.4392	-29.5645	-26.4888	1.50283
11.8824	0	520	0	530	0	525	0	535	0	535	0	535	0	535	0	535	0	525	0	535	0	535	0	535	0	0	531.538	1.43051	0.5935	-30.6584	-31.8147	-23.2829	-31.5022	-14.7198	-21.7515	-22.3453	-29.9396	-30.0333	-25.4705	-23.8454	-30.7521	-26.343	1.53173
11.8924	0	520	0	530	0	525	0	535	0	535	0	535	0	535	0	535	0	525	0	535	0	535	0	535	0	0	531.538	1.43051	0.594	-30.5021	-31.8459	-23.7516	-31.5647	-15.3448	-23.3141	-24.0642	-26.6581	-30.5021	-23.3141	-23.5954	-31.1584	-26.3013	1.44122
11.9024	0	520	0	530	0	525	0	535	0	535	0	535	0	535	0	535	0	525	0	535	0	535	0	535	0	0	531.538	1.43051	0.5945	-29.8771	-32.0647	-23.3141	-30.6584	-15.6886	-23.5329	-22.8766	-29.502	-29.8458	-24.3767	-25.1892	-28.5332	-26.2883	1.34463
11.9125	0	520	0	530	0	525	0	535	0	535	0	535	0	535	0	535	0	525	0	535	0	535	0	535	0	0	531.538	1.43051	0.595	-30.6584	-32.0022	-23.5641	-32.1897	-14.751	-23.2516	-23.8767	-27.0019	-28.7832	-25.3143	-22.8141	-29.4395	-26.1372	1.43429
11.9225	0	520	0	530	0	525	0	535	0	535	0	535	0	535	0	535	0	525	0	535	0	535	0	535	0	0	531.538	1.43051	0.5955	-30.6584	-31.9397	-23.2516	-32.0022	-15.5948	-22.6266	-23.2829	-29.0958	-29.8458	-25.1267	-23.5641	-30.0021	-26.4159	1.43707
11.9325	0	520	0	530	0	525	0	535	0	535	0	535	0	535	0	535	0	525	0	535	0	535	0	535	0	0	531.538	1.43051	0.596	-31.6584	-32.1272	-23.8141	-32.8773	-15.1885	-23.2516	-25.1267	-26.8144	-30.0958	-25.533	-24.0642	-29.8771	-26.7024	1.44954
11.9425	0	520	0	530	0	525	0	535	0	535	0	535	0	535	0	535	0	525	0	535	0	535	0	535	0	0	531.538	1.43051	0.5965	-30.1271	-32.6272	-23.6891	-33.1898	-15.4073	-23.0953	-23.0953	-28.4395	-29.6583	-25.408	-23.5329	-29.4708	-26.4784	1.46198
11.9525	0	520	0	530	0	525	0	535	0	535	0	535	0	535	0	535	0	525	0	535	0	535	0	535	0	0	531.538	1.43051	0.597	-30.5334	-32.0647	-23.4079	-29.8771	-14.3447	-23.3766	-23.6579	-27.0644	-30.4083	-25.5643	-24.0954	-29.7833	-26.1815	1.41849
11.9626	0	520	0	530	0	525	0	535	0	535	0	535	0	535	0	535	0	525	0	535	0	535	0	535	0	0	531.538	1.43051	0.5975	-30.0646	-32.096	-23.3141	-31.8772	-14.5948	-24.5329	-23.4079	-28.9395	-30.8771	-24.3142	-24.4392	-29.9708	-26.5357	1.46788
11.9726	0	520	0	530	0	525	0	535	0	535	0	535	0	535	0	535	0	525	0	535	0	535	0	535	0	0	531.538	1.43051	0.598	-30.4083	-31.1272	-23.9392	-31.5959	-15.1885	-23.3141	-23.6891	-27.4706	-29.377	-24.5642	-24.1579	-30.7521	-26.2987	1.37966
11.9826	0	520	0	530	0	525	0	535	0	535	0	535	0	535	0	535	0	525	0	535	0	535	0	535	0	0	531.538	1.43051	0.5985	-30.2521	-31.5959	-23.1891	-34.1274	-15.6261	-22.8766	-22.7828	-28.4707	-30.4083	-25.0642	-23.5016	-28.5332	-26.369	1.47841
11.9926	0	520	0	530	0	525	0	535	0	535	0	535	0	535	0	535	0	525	0	535	0	535	0	535	0	0	531.538	1.43051	0.599	-30.8459	-31.4084	-23.7516	-33.2835	-15.0323	-24.0954	-23.8767	-27.8769	-30.1271	-24.6267	-23.9392	-30.8146	-26.6399	1.46738
12.0026	0	520	0	530	0	525	0	535	0	535	0	535	0	535	0	535	0	525	0	535	0	535	0	535	0	0	531.538	1.43051	0.5995	-29.9083	-31.2834	-23.3454	-31.5022	-15.0635	-23.6266	-24.1579	-27.7519	-29.7208	-24.1892	-24.4079	-27.7207	-26.0565	1.33369
12.0127	0	520	0	530	0	525	0	535	0	535	0	535	0	535	0	535	0	525	0	535	0	535	0	535	0	0	531.538	1.43051	0.6	-30.6584	-31.7522	-23.5329	-31.0959	-15.2823	-21.689	-23.8767	-28.502	-29.9708	-24.3767	-24.1892	-29.377	-26.1919	1.41343
12.0227	0	520	0	530	0	525	0	535	0	535	0	535	0	535	0	535	0	525	0	535	0	535	0	535	0	0	531.538	1.43051	0.6005	-30.5959	-31.8772	-23.4391	-31.0959	-15.251	-22.9391	-24.1267	-27.5331	-30.0021	-23.4704	-25.8768	-28.1582	-26.1971	1.36399
12.0327	0	520	0	530	0	525	0	535	0	535	0	535	0	535	0	535	0	525	0	535	0	535	0	535	0	0	531.538	1.43051	0.601	-30.5021	-32.1897	-23.4704	-30.9709	-14.9385	-23.4079	-23.8141	-28.252	-31.0334	-24.5329	-23.9704	-28.2832	-26.2805	1.41553
12.0427	0	520	0	530	0	525	0	535	0	535	0	535	0	535	0	535	0	525	0	535	0	535	0	535	0	0	531.538	1.43051	0.6015	-30.3146	-31.7522	-22.6578	-31.0959	-15.3761	-23.0953	-23.9704	-28.4395	-30.4083	-25.533	-23.9392	-28.8457	-26.2857	1.3796
12.0527	0	520	0	530	0	525	0	535	0	535	0	535	0	535	0	535	0	525	0	535	0	535	0	535	0	0	531.538	1.43051	0.602	-30.5959	-32.2522	-23.5641	-29.4395	-14.0947	-23.4391	-22.7516	-28.6895	-30.5021	-24.1267	-24.1267	-29.4083	-26.0825	1.4639
12.0627	0	520	0	530	0	525	0	535	0	535	0	535	0	535	0	535	0	525	0	535	0	535	0	535	0	0	531.538	1.43051	0.6025	-30.4708	-32.1897	-23.0016	-30.5646	-16.0949	-23.5329	-24.0017	-29.1895	-31.1897	-24.1579	-23.5641	-28.8457	-26.4003	1.37325
12.0728	0	520	0	530	0	525	0	535	0	535	0	535	0	535	0	535	0	525	0	535	0	535	0	535	0	0	531.538	1.43051	0.603	-30.5646	-32.0022	-23.4704	-30.8146	-14.9698	-24.1579	-23.8454	-27.9394	-31.0334	-24.1892	-23.5641	-28.1269	-26.2232	1.39908
12.0828	0	520	0	530	0	525	0	535	0	535	0	535	0	535	0	535	0	525	0	535	0	535	0	535	0	0	531.538	1.43051	0.6035	-31.5959	-32.0335	-23.5329	-31.7522	-14.626	-23.4704	-24.1892	-27.6894	-29.5958	-24.6579	-23.6891	-30.0646	-26.4081	1.46521
12.0928	0	520	0	530	0	525	0	535	0	535	0	535	0	535	0	535	0	525	0	535	0	535	0	535	0	0	531.538	1.43051	0.604	-30.1583	-32.1897	-22.9391	-31.1897	-15.1885	-23.5954	-23.5016	-28.7207	-30.4083	-23.6579	-25.2517	-29.5958	-26.3664	1.41694
12.1028	0	520	0	530	0	525	0	535	0	535	0	535	0	535	0	535	0	525	0	535	0	535	0	535	0	0	531.538	1.43051	0.6045	-30.8146	-31.971	-23.6266	-31.9084	-14.251	-23.2829	-23.4704	-28.4707	-30.9396	-24.5017	-24.3454	-30.9084	-26.5409	1.5257
12.1128	0	520	0	530	0	525	0	535	0	535	0	535	0	535	0	535	0	525	0	535	0	535	0	535	0	0	531.538	1.43051	0.605	-30.9084	-32.0647	-23.5016	-30.3458	-15.8136	-22.4703	-23.5329	-28.0019	-31.0334	-25.3768	-24.5017	-30.0333	-26.4654	1.38705
12.1229	0	520	0	530	0	525	0	535	0	535	0	535	0	535	0	535	0	525	0	535	0	535	0	535	0	0	531.538	1.43051	0.6055	-30.5646	-31.5959	-23.3141	-31.6584	-15.7511	-24.6892	-23.5641	-27.3769	-31.5959	-24.9705	-23.6579	-30.9084	-26.6373	1.41166
12.1329	0	520	0	530	0	525	0	535	0	535	0	535	0	535	0	535	0	525	0	535	0	535	0	535	0	0	531.538	1.43051	0.606	-31.0646	-31.5334	-23.3454	-31.4397	-15.9386	-23.1891	-23.2516	-28.1895	-30.3146	-24.5954	-22.9703	-29.1895	-26.2518	1.38599
12.1429	0	520	0	530	0	525	0	535	0	535	0	535	0	535	0	535	0	525	0	535	0	535	0	535	0	0	531.538	1.43051	0.6065	-30.9709	-31.6897	-23.8141	-30.6271	-16.0324	-23.1266	-23.1891	-27.7832	-30.1583	-24.9392	-24.5642	-29.4083	-26.3586	1.3272
12.1529	0	520	0	530	0	525	0	535	0	535	0	535	0	535	0	535	0	525	0	535	0	535	0	535	0	0	531.538	1.43051	0.607	-30.1583	-32.1585	-23.3141	-31.8772	-14.3135	-25.8768	-24.0642	-27.4706	-30.7521	-23.4079	-24.1579	-29.8146	-26.4471	1.46763
12.1629	0	520	0	530	0	525	0	535	0	535	0	535	0	535	0	535	0	525	0	535	0	535	0	535	0	0	531.538	1.43051	0.6075	-31.0021	-31.8772	-23.5016	-31.0334	-15.0323	-21.439	-24.2829	-27.8769	-30.3146	-24.3454	-25.1267	-28.6895	-26.2101	1.42362
12.173	0	520	0	530	0	525	0	535	0	535	0	535	0	535	0	535	0	525	0	535	0	535	0	535	0	0	531.538	1.43051	0.608	-30.8459	-31.6897	-23.2829	-31.7834	-14.7823	-24.5954	-23.8454	-27.4081	-29.6896	-24.2829	-24.0017	-29.8458	-26.3378	1.41715
12.183	0	520	0	530	0	525	0	535	0	535	0	535	0	535	0	535	0	525	0	535	0	535	0	535	0	0	531.538	1.43051	0.6085	-30.8459	-31.5334	-23.0328	-30.0958	-15.9386	-22.4703	-23.4704	-27.9707	-31.0021	-25.3143	-23.6579	-29.9083	-26.27	1.37354
12.193	0	520	0	530	0	525	0	535	0	535	0	535	0	535	0	535	0	525	0	535	0	535	0	535	0	0	531.538	1.43051	0.609	-31.0959	-31.2522	-23.5641	-29.1583	-15.4386	-24.0642	-24.4079	-28.1895	-29.5958	-26.0018	-26.2831	-28.9707	-26.5018	1.264
12.203	0	520	0	530	0	525	0	535	0	535	0	535	0	535	0	535	0	525	0	535	0	535	0	535	0	0	531.538	1.43051	0.6095	-31.2522	-31.7209	-23.3141	-30.7834	-15.4698	-24.0017	-23.8767	-27.8769	-30.0021	-25.1892	-22.5016	-29.3145	-26.2753	1.38254
12.213	0	520	0	530	0	525	0	535	0	535	0	535	0	535	0	535	0	525	0	535	0	535	0	535	0	0	531.538	1.43051	0.61	-31.5334	-31.7834	-23.4079	-31.7834	-14.9698	-22.6266	-23.8141	-28.9082	-30.6896	-24.0954	-24.1892	-29.9396	-26.4784	1.4878
12.223	0	520	0	530	0	525	0	535	0	535	0	535	0	535	0	535	0	525	0	535	0	535	0	535	0	0	531.538	1.43051	0.6105	-31.6584	-31.1897	-23.3141	-31.5022	-15.3448	-24.3142	-22.8766	-27.5644	-29.5958	-25.158	-24.3454	-29.0645	-26.3273	1.37482
12.2331	0	520	0	530	0	525	0	535	0	535	0	535	0	535	0	535	0	525	0	535	0	535	0	535	0	0	531.538	1.43051	0.611	-31.3147	-31.9397	-23.8141	-31.5647	-16.1886	-21.814	-22.314	-28.0332	-30.0646	-24.2517	-25.5955	-30.9084	-26.4836	1.43496
12.2431	0	520	0	530	0	525	0	535	0	535	0	535	0	535	0	535	0	525	0	535	0	535	0	535	0	0	531.538	1.43051	0.6115	-31.5334	-31.6584	-23.7829	-31.6272	-13.5947	-24.0017	-23.9704	-28.4707	-30.8771	-25.0017	-23.6266	-28.9395	-26.4237	1.51814
12.2531	0	520	0	530	0	525	0	535	0	535	0	535	0	535	0	535	0	525	0	535	0	535	0	535	0	0	531.538	1.43051	0.612	-30.5646	-31.5647	-23.8454	-31.8772	-14.9073	-21.939	-23.6579	-28.0332	-30.3146	-24.8455	-24.1892	-31.0334	-26.3977	1.47404
12.2631	0	520	0	530	0	525	0	535	0	535	0	535	0	535	0	535	0	525	0	535	0	535	0	535	0	0	531.538	1.43051	0.6125	-31.1897	-31.7834	-23.6579	-32.7523	-15.4698	-23.2516	-23.8141	-26.7519	-30.4083	-25.158	-24.1267	-30.5959	-26.58	1.44594
12.2731	0	520	0	530	0	525	0	535	0	535	0	535	0	535	0	535	0	525	0	535	0	535	0	535	0	0	531.538	1.43051	0.613	-31.3459	-31.1897	-23.3141	-31.6584	-14.3135	-22.3765	-23.3766	-27.8144	-30.8146	-25.1892	-25.658	-28.8457	-26.3247	1.47044
[truncated: 52,773 more rows]

## Sheet: 2 D
cal. phase	step 1	step 2	step 3	step 4
-31.3	-31.67	-36.19	-26.32	-26.05
[truncated: 12 more rows]

## Sheet: 2 E
cal. → step 1	step 1 → step 2	step 1 → step 3	step 1 → step 4
[truncated: 13 more rows]

[truncated: 5 more sheets: 2 F-H, 2 I, 2 J, 2 K, 2 L]
