# Supplementary material for: All-optical closed-loop voltage clamp for precise control of muscles and neurons in live animals
Source: Research Square preprint supplement (doi:10.21203/rs.3.rs-1505565/v1), 2023-03-29
Supplement: Supplementary file 3 [file 25587b0acd6accca44e2a8ba.docx]

All-optical closed-loop voltage clamp for precise control of muscles and neurons in live animals

Amelie C.F. Bergs1,2, Jana F. Liewald1,2, Silvia Rodriguez-Rozada3, Qiang Liu4, 5, Christin Wirt1,2, Artur Bessel6, Nadja Zeitzschel1,2, Hilal Durmaz1,2, Adrianna Nozownik3, Holger Dill1,2, Maëlle Jospin7 Johannes Vierock8, Cornelia I. Bargmann4,9, Peter Hegemann8, J. Simon Wiegert3,10, Alexander Gottschalk1,2,*

**Affiliations:**

1 Buchmann Institute for Molecular Life Sciences, Goethe University, Max-von-Laue-Strasse 15, D-60438 Frankfurt, Germany.

2 Institute of Biophysical Chemistry, Goethe University, Max-von-Laue-Strasse 9, D-60438 Frankfurt, Germany.

3 Research Group Synaptic Wiring and Information Processing, Center for Molecular Neurobiology Hamburg, University Medical Center Hamburg-Eppendorf, D-20251 Hamburg, Germany.

4 Lulu and Anthony Wang Laboratory of Neural Circuits and Behavior, The Rockefeller University, New York, NY 10065, USA.

5 Department of Neuroscience, City University of Hong Kong, Tat Chee Avenue, Kowloon Tong, Hong Kong, China.

6 independent researcher: Melatener Strasse 93, D-52074 Aachen, Germany.

7 Université Claude Bernard Lyon 1, Institut NeuroMyoGène, 8 avenue Rockefeller, 69008 Lyon, France

8 Institute for Biology, Experimental Biophysics, Humboldt University, D-10115 Berlin, Germany.

9 Chan Zuckerberg Initiative, Palo Alto, USA.

10 Medical Faculty Mannheim, University of Heidelberg, Ludolf-Krehl-Strasse 13-17, D-68167 Mannheim, Germany.

* Corresponding author. Email: a.gottschalk@em.uni-frankfurt.de

**Inventory of Supporting information**

Supplementary Figures 1-10

Supplementary Table 1

Supplementary References

Source Data Figures 1-6

Source Data Figures S1-10

Source Data Table 1

Supplementary Movies 1-3

Code

Reporting Summary

Editorial Policy checklist

Software checklist
