# Supplementary material for: All-optical closed-loop voltage clamp for precise control of muscles and neurons in live animals
Source: Research Square preprint supplement (doi:10.21203/rs.3.rs-1505565/v1), 2023-03-29
Supplement: Supplementary file 4 [file 2b1d70b6a7ff162a27d0eb6b.xlsx]

## Sheet: ED Figure 2B
	upper panel		lower panel
Time (s)	DF/F0	Wavelength	DF/F0	Wavelength
0.011	0	535	0	525
0.0219	0	535	0	525
0.0329	0	535	0	525
0.0438	0	535	0	525
0.0548	0	535	0	525
0.0658	0	535	0	525
0.0767	0	535	0	525
0.0877	0	535	0	525
0.0987	0	535	0	525
0.1096	0	535	0	525
0.1206	0	535	0	525
0.1315	0	535	0	525
0.1425	0	535	0	525
0.1535	0	535	0	525
0.1644	0	535	0	525
0.1754	0	535	0	525
0.1864	0	535	0	525
0.1973	0	535	0	525
0.2083	0	535	0	525
0.2192	0	535	0	525
0.2302	0	535	0	525
0.2412	0	535	0	525
0.2521	0	535	0	525
0.2631	0	535	0	525
0.2741	0	535	0	525
0.285	0	535	0	525
0.296	0	535	0	525
0.3069	0	535	0	525
0.3179	0	535	0	525
0.3289	0	535	0	525
0.3398	0	535	0	525
0.3508	0	535	0	525
0.3618	0	535	0	525
0.3727	0	535	0	525
0.3837	0	535	0	525
0.3946	0	535	0	525
0.4056	0	535	0	525
0.4166	0	535	0	525
0.4275	0	535	0	525
0.4385	0	535	0	525
0.4495	0	535	0	525
0.4604	0	535	0	525
0.4714	0	535	0	525
0.4823	0	535	0	525
0.4933	0	535	0	525
0.5043	0	535	0	525
0.5152	0	535	0	525
0.5262	0	535	0	525
0.5372	0	535	0	525
0.5481	0	535	0	525
0.5591	0	535	0	525
0.57	0	535	0	525
0.581	0	535	0	525
0.592	0	535	0	525
0.6029	0	535	0	525
0.6139	0	535	0	525
0.6249	0	535	0	525
0.6358	0	535	0	525
0.6468	0	535	0	525
0.6577	0	535	0	525
0.6687	0	535	0	525
0.6797	0	535	0	525
0.6906	0	535	0	525
0.7016	0	535	0	525
0.7125	0	535	0	525
0.7235	0	535	0	525
0.7345	0	535	0	525
0.7454	0	535	0	525
0.7564	0	535	0	525
0.7674	0	535	0	525
0.7783	0	535	0	525
0.7893	0	535	0	525
0.8002	0	535	0	525
0.8112	0	535	0	525
0.8222	0	535	0	525
0.8331	0	535	0	525
0.8441	0	535	0	525
0.8551	0	535	0	525
0.866	0	535	0	525
0.877	0	535	0	525
0.8879	0	535	0	525
0.8989	0	535	0	525
0.9099	0	535	0	525
0.9208	0	535	0	525
0.9318	0	535	0	525
0.9428	0	535	0	525
0.9537	0	535	0	525
0.9647	0	535	0	525
0.9756	0	535	0	525
0.9866	0	535	0	525
0.9976	0	535	0	525
1.0085	0	535	0	525
1.0195	0	535	0	525
1.0305	0	535	0	525
1.0414	0	535	0	525
1.0524	0	535	0	525
1.0633	0	535	0	525
1.0743	0	535	0	525
1.0853	0	535	0	525
1.0962	0	535	0	525
1.1072	0	535	0	525
1.1182	0	535	0	525
1.1291	0	535	0	525
1.1401	0	535	0	525
1.151	0	535	0	525
1.162	0	535	0	525
1.173	0	535	0	525
1.1839	0	535	0	525
1.1949	0	535	0	525
1.2059	0	535	0	525
1.2168	0	535	0	525
1.2278	0	535	0	525
1.2387	0	535	0	525
1.2497	0	535	0	525
1.2607	0	535	0	525
1.2716	0	535	0	525
1.2826	0	535	0	525
1.2936	0	535	0	525
1.3045	0	535	0	525
1.3155	0	535	0	525
1.3264	0	535	0	525
1.3374	0	535	0	525
1.3484	0	535	0	525
1.3593	0	535	0	525
1.3703	0	535	0	525
1.3812	0	535	0	525
1.3922	0	535	0	525
1.4032	0	535	0	525
1.4141	0	535	0	525
1.4251	0	535	0	525
1.4361	0	535	0	525
1.447	0	535	0	525
1.458	0	535	0	525
1.4689	0	535	0	525
1.4799	0	535	0	525
1.4909	0	535	0	525
1.5018	0	535	0	525
1.5128	0	535	0	525
1.5238	0	535	0	525
1.5347	0	535	0	525
1.5457	0	535	0	525
1.5566	0	535	0	525
1.5676	0	535	0	525
1.5786	0	535	0	525
1.5895	0	535	0	525
1.6005	0	535	0	525
1.6115	0	535	0	525
1.6224	0	535	0	525
1.6334	0	535	0	525
1.6443	0	535	0	525
1.6553	0	535	0	525
1.6663	0	535	0	525
1.6772	0	535	0	525
1.6882	0	535	0	525
1.6992	0	535	0	525
1.7101	0	535	0	525
1.7211	0	535	0	525
1.732	0	535	0	525
1.743	0	535	0	525
1.754	0	535	0	525
1.7649	0	535	0	525
1.7759	0	535	0	525
1.7869	0	535	0	525
1.7978	0	535	0	525
1.8088	0	535	0	525
1.8197	0	535	0	525
1.8307	0	535	0	525
1.8417	0	535	0	525
1.8526	0	535	0	525
1.8636	0	535	0	525
1.8746	0	535	0	525
1.8855	0	535	0	525
1.8965	0	535	0	525
1.9074	0	535	0	525
1.9184	0	535	0	525
1.9294	0	535	0	525
1.9403	0	535	0	525
1.9513	0	535	0	525
1.9623	0	535	0	525
1.9732	0	535	0	525
1.9842	0	535	0	525
1.9951	0	535	0	525
2.0061	0	535	0	525
2.0171	0	535	0	525
2.028	0	535	0	525
2.039	0	535	0	525
2.05	0	535	0	525
2.0609	0	535	0	525
2.0719	0	535	0	525
2.0828	0	535	0	525
2.0938	0	535	0	525
2.1048	0	535	0	525
2.1157	0	535	0	525
2.1267	0	535	0	525
2.1376	0	535	0	525
2.1486	0	535	0	525
2.1596	0	535	0	525
2.1705	0	535	0	525
2.1815	0	535	0	525
2.1925	0	535	0	525
2.2034	0	535	0	525
2.2144	0	535	0	525
2.2253	0	535	0	525
2.2363	0	535	0	525
2.2473	0	535	0	525
2.2582	0	535	0	525
2.2692	0	535	0	525
2.2802	0	535	0	525
2.2911	0	535	0	525
2.3021	0	535	0	525
2.313	0	535	0	525
2.324	0	535	0	525
2.335	0	535	0	525
2.3459	0	535	0	525
2.3569	0	535	0	525
2.3679	0	535	0	525
2.3788	0	535	0	525
2.3898	0	535	0	525
2.4007	0	535	0	525
2.4117	0	535	0	525
2.4227	0	535	0	525
2.4336	0	535	0	525
2.4446	0	535	0	525
2.4556	0	535	0	525
2.4665	0	535	0	525
2.4775	0	535	0	525
2.4884	0	535	0	525
2.4994	0	535	0	525
2.5104	0	535	0	525
2.5213	0	535	0	525
2.5323	0	535	0	525
2.5433	0	535	0	525
2.5542	0	535	0	525
2.5652	0	535	0	525
2.5761	0	535	0	525
2.5871	0	535	0	525
2.5981	0	535	0	525
2.609	0	535	0	525
2.62	0	535	0	525
2.631	0	535	0	525
2.6419	0	535	0	525
2.6529	0	535	0	525
2.6638	0	535	0	525
2.6748	0	535	0	525
2.6858	0	535	0	525
2.6967	0	535	0	525
2.7077	0	535	0	525
2.7187	0	535	0	525
2.7296	0	535	0	525
2.7406	0	535	0	525
2.7515	0	535	0	525
2.7625	0	535	0	525
2.7735	0	535	0	525
2.7844	0	535	0	525
2.7954	0	535	0	525
2.8063	0	535	0	525
2.8173	0	535	0	525
2.8283	0	535	0	525
2.8392	0	535	0	525
2.8502	0	535	0	525
2.8612	0	535	0	525
2.8721	0	535	0	525
2.8831	0	535	0	525
2.894	0	535	0	525
2.905	0	535	0	525
2.916	0	535	0	525
2.9269	0	535	0	525
2.9379	0	535	0	525
2.9489	0	535	0	525
2.9598	0	535	0	525
2.9708	0	535	0	525
2.9817	0	535	0	525
2.9927	0	535	0	525
3.0037	0	535	0	525
3.0146	0	535	0	525
3.0256	0	535	0	525
3.0366	0	535	0	525
3.0475	0	535	0	525
3.0585	0	535	0	525
3.0694	0	535	0	525
3.0804	0	535	0	525
3.0914	0	535	0	525
3.1023	0	535	0	525
3.1133	0	535	0	525
3.1243	0	535	0	525
3.1352	0	535	0	525
3.1462	0	535	0	525
3.1571	0	535	0	525
3.1681	0	535	0	525
3.1791	0	535	0	525
3.19	0	535	0	525
3.201	0	535	0	525
3.212	0	535	0	525
3.2229	0	535	0	525
3.2339	0	535	0	525
3.2448	0	535	0	525
3.2558	0	535	0	525
3.2668	0	535	0	525
3.2777	0	535	0	525
3.2887	0	535	0	525
3.2997	0	535	0	525
3.3106	0	535	0	525
3.3216	0	535	0	525
3.3325	0	535	0	525
3.3435	0	535	0	525
3.3545	0	535	0	525
3.3654	0	535	0	525
3.3764	0	535	0	525
3.3874	0	535	0	525
3.3983	0	535	0	525
3.4093	0	535	0	525
3.4202	0	535	0	525
3.4312	0	535	0	525
3.4422	0	535	0	525
3.4531	0	535	0	525
3.4641	0	535	0	525
3.475	0	535	0	525
3.486	0	535	0	525
3.497	0	535	0	525
3.5079	0	535	0	525
3.5189	0	535	0	525
3.5299	0	535	0	525
3.5408	0	535	0	525
3.5518	0	535	0	525
3.5627	0	535	0	525
3.5737	0	535	0	525
3.5847	0	535	0	525
3.5956	0	535	0	525
3.6066	0	535	0	525
3.6176	0	535	0	525
3.6285	0	535	0	525
3.6395	0	535	0	525
3.6504	0	535	0	525
3.6614	0	535	0	525
3.6724	0	535	0	525
3.6833	0	535	0	525
3.6943	0	535	0	525
3.7053	0	535	0	525
3.7162	0	535	0	525
3.7272	0	535	0	525
3.7381	0	535	0	525
3.7491	0	535	0	525
3.7601	0	535	0	525
3.771	0	535	0	525
3.782	0	535	0	525
3.793	0	535	0	525
3.8039	0	535	0	525
3.8149	0	535	0	525
3.8258	0	535	0	525
3.8368	0	535	0	525
3.8478	0	535	0	525
3.8587	0	535	0	525
3.8697	0	535	0	525
3.8807	0	535	0	525
3.8916	0	535	0	525
3.9026	0	535	0	525
3.9135	0	535	0	525
3.9245	0	535	0	525
3.9355	0	535	0	525
3.9464	0	535	0	525
3.9574	0	535	0	525
3.9684	0	535	0	525
3.9793	0	535	0	525
3.9903	0	535	0	525
4.0012	0	535	0	525
4.0122	0	535	0	525
4.0232	0	535	0	525
4.0341	0	535	0	525
4.0451	0	535	0	525
4.0561	0	535	0	525
4.067	0	535	0	525
4.078	0	535	0	525
4.0889	0	535	0	525
4.0999	0	535	0	525
4.1109	0	535	0	525
4.1218	0	535	0	525
4.1328	0	535	0	525
4.1438	0	535	0	525
4.1547	0	535	0	525
4.1657	0	535	0	525
4.1766	0	535	0	525
4.1876	0	535	0	525
4.1986	0	535	0	525
4.2095	0	535	0	525
4.2205	0	535	0	525
4.2314	0	535	0	525
4.2424	0	535	0	525
4.2534	0	535	0	525
4.2643	0	535	0	525
4.2753	0	535	0	525
4.2863	0	535	0	525
4.2972	0	535	0	525
4.3082	0	535	0	525
4.3191	0	535	0	525
4.3301	0	535	0	525
4.3411	0	535	0	525
4.352	0	535	0	525
4.363	0	535	0	525
4.374	0	535	0	525
4.3849	0	535	0	525
4.3959	0	535	0	525
4.4068	0	535	0	525
4.4178	0	535	0	525
4.4288	0	535	0	525
4.4397	0	535	0	525
4.4507	0	535	0	525
4.4617	0	535	0	525
4.4726	0	535	0	525
4.4836	0	535	0	525
4.4945	0	535	0	525
4.5055	0	535	0	525
4.5165	0	535	0	525
4.5274	0	535	0	525
4.5384	0	535	0	525
4.5494	0	535	0	525
4.5603	0	535	0	525
4.5713	0	535	0	525
4.5822	0	535	0	525
4.5932	0	535	0	525
4.6042	0	535	0	525
4.6151	0	535	0	525
4.6261	0	535	0	525
4.6371	0	535	0	525
4.648	0	535	0	525
4.659	0	535	0	525
4.6699	0	535	0	525
4.6809	0	535	0	525
4.6919	0	535	0	525
4.7028	0	535	0	525
4.7138	0	535	0	525
4.7248	0	535	0	525
4.7357	0	535	0	525
4.7467	0	535	0	525
4.7576	0	535	0	525
4.7686	0	535	0	525
4.7796	0	535	0	525
4.7905	0	535	0	525
4.8015	0	535	0	525
4.8125	0	535	0	525
4.8234	0	535	0	525
4.8344	0	535	0	525
4.8453	0	535	0	525
4.8563	0	535	0	525
4.8673	0	535	0	525
4.8782	0	535	0	525
4.8892	0	535	0	525
4.9001	0	535	0	525
4.9111	0	535	0	525
4.9221	0	535	0	525
4.933	0	535	0	525
4.944	0	535	0	525
4.955	0	535	0	525
4.9659	0	535	0	525
4.9769	0	535	0	525
4.9878	0	535	0	525
4.9988	0	535	0	525
5.0098	0	535	0	525
5.0207	0	535	0	525
5.0317	0	535	0	525
5.0427	0	535	0	525
5.0536	0	535	0	525
5.0646	0	535	0	525
5.0755	0	535	0	525
5.0865	0	535	0	525
5.0975	0	535	0	525
5.1084	0	535	0	525
5.1194	0	535	0	525
5.1304	0	535	0	525
5.1413	0	535	0	525
5.1523	0	535	0	525
5.1632	0	535	0	525
5.1742	0	535	0	525
5.1852	0	535	0	525
5.1961	0	535	0	525
5.2071	0	535	0	525
5.2181	0	535	0	525
5.229	0	535	0	525
5.24	0	535	0	525
5.2509	0	535	0	525
5.2619	0	535	0	525
5.2729	0	535	0	525
5.2838	0	535	0	525
5.2948	0	535	0	525
5.3058	0	535	0	525
5.3167	0	535	0	525
5.3277	0	535	0	525
5.3386	0	535	0	525
5.3496	0	535	0	525
5.3606	0	535	0	525
5.3715	0	535	0	525
5.3825	0	535	0	525
5.3935	0	535	0	525
5.4044	0	535	0	525
5.4154	0	535	0	525
5.4263	0	535	0	525
5.4373	0	535	0	525
5.4483	0	535	0	525
5.4592	0	535	0	525
5.4702	0	535	0	525
5.4812	0	535	0	525
5.4921	0	535	0	525
5.5031	0	535	0	525
5.514	0	535	0	525
5.525	0	535	0	525
5.536	0	535	0	525
5.5469	0	535	0	525
5.5579	0	535	0	525
5.5688	0	535	0	525
5.5798	0	535	0	525
5.5908	0	535	0	525
5.6017	0	535	0	525
5.6127	0	535	0	525
5.6237	0	535	0	525
5.6346	0	535	0	525
5.6456	0	535	0	525
5.6565	0	535	0	525
5.6675	0	535	0	525
5.6785	0	535	0	525
5.6894	0	535	0	525
5.7004	0	535	0	525
5.7114	0	535	0	525
5.7223	0	535	0	525
5.7333	0	535	0	525
5.7442	0	535	0	525
5.7552	0	535	0	525
5.7662	0	535	0	525
5.7771	0	535	0	525
5.7881	0	535	0	525
5.7991	0	535	0	525
5.81	0	535	0	525
5.821	0	535	0	525
5.8319	0	535	0	525
5.8429	0	535	0	525
5.8539	0	535	0	525
5.8648	0	535	0	525
5.8758	0	535	0	525
5.8868	0	535	0	525
5.8977	0	535	0	525
5.9087	0	535	0	525
5.9196	0	535	0	525
5.9306	0	535	0	525
5.9416	0	535	0	525
5.9525	0	535	0	525
5.9635	0	535	0	525
5.9745	0	535	0	525
5.9854	0	535	0	525
5.9964	0	535	0	525
6.0073	0	535	0	525
6.0183	0	535	0	525
6.0293	0	535	0	525
6.0402	0	535	0	525
6.0512	0	535	0	525
6.0622	0	535	0	525
6.0731	0	535	0	525
6.0841	0	535	0	525
6.095	0	535	0	525
6.106	0	535	0	525
6.117	0	535	0	525
6.1279	0	535	0	525
6.1389	0	535	0	525
6.1499	0	535	0	525
6.1608	0	535	0	525
6.1718	0	535	0	525
6.1827	0	535	0	525
6.1937	0	535	0	525
6.2047	0	535	0	525
6.2156	0	535	0	525
6.2266	0	535	0	525
6.2375	0	535	0	525
6.2485	0	535	0	525
6.2595	0	535	0	525
6.2704	0	535	0	525
6.2814	0	535	0	525
6.2924	0	535	0	525
6.3033	0	535	0	525
6.3143	0	535	0	525
6.3252	0	535	0	525
6.3362	0	535	0	525
6.3472	0	535	0	525
6.3581	0	535	0	525
6.3691	0	535	0	525
6.3801	0	535	0	525
6.391	0	535	0	525
6.402	0	535	0	525
6.4129	0	535	0	525
6.4239	0	535	0	525
6.4349	0	535	0	525
6.4458	0	535	0	525
6.4568	0	535	0	525
6.4678	0	535	0	525
6.4787	0	535	0	525
6.4897	0	535	0	525
6.5006	0	535	0	525
6.5116	0	535	0	525
6.5226	0	535	0	525
6.5335	0	535	0	525
6.5445	0	535	0	525
6.5555	0	535	0	525
6.5664	0	535	0	525
6.5774	0	535	0	525
6.5883	0	535	0	525
6.5993	0	535	0	525
6.6103	0	535	0	525
6.6212	0	535	0	525
6.6322	0	535	0	525
6.6432	0	535	0	525
6.6541	0	535	0	525
6.6651	0	535	0	525
6.676	0	535	0	525
6.687	0	535	0	525
6.698	0	535	0	525
6.7089	0	535	0	525
6.7199	0	535	0	525
6.7309	0	535	0	525
6.7418	0	535	0	525
6.7528	0	535	0	525
6.7637	0	535	0	525
6.7747	0	535	0	525
6.7857	0	535	0	525
6.7966	0	535	0	525
6.8076	0	535	0	525
6.8186	0	535	0	525
6.8295	0	535	0	525
6.8405	0	535	0	525
6.8514	0	535	0	525
6.8624	0	535	0	525
6.8734	0	535	0	525
6.8843	0	535	0	525
6.8953	0	535	0	525
6.9062	0	535	0	525
6.9172	0	535	0	525
6.9282	0	535	0	525
6.9391	0	535	0	525
6.9501	0	535	0	525
6.9611	0	535	0	525
6.972	0	535	0	525
6.983	0	535	0	525
6.9939	0	535	0	525
7.0049	0	535	0	525
7.0159	0	535	0	525
7.0268	0	535	0	525
7.0378	0	535	0	525
7.0488	0	535	0	525
7.0597	0	535	0	525
7.0707	0	535	0	525
7.0816	0	535	0	525
7.0926	0	535	0	525
7.1036	0	535	0	525
7.1145	0	535	0	525
7.1255	0	535	0	525
7.1365	0	535	0	525
7.1474	0	535	0	525
7.1584	0	535	0	525
7.1693	0	535	0	525
7.1803	0	535	0	525
7.1913	0	535	0	525
7.2022	0	535	0	525
7.2132	0	535	0	525
7.2242	0	535	0	525
7.2351	0	535	0	525
7.2461	0	535	0	525
7.257	0	535	0	525
7.268	0	535	0	525
7.279	0	535	0	525
7.2899	0	535	0	525
7.3009	0	535	0	525
7.3119	0	535	0	525
7.3228	0	535	0	525
7.3338	0	535	0	525
7.3447	0	535	0	525
7.3557	0	535	0	525
7.3667	0	535	0	525
7.3776	0	535	0	525
7.3886	0	535	0	525
7.3996	0	535	0	525
7.4105	0	535	0	525
7.4215	0	535	0	525
7.4324	0	535	0	525
7.4434	0	535	0	525
7.4544	0	535	0	525
7.4653	0	535	0	525
7.4763	0	535	0	525
7.4873	0	535	0	525
7.4982	0	535	0	525
7.5092	0	535	0	525
7.5201	0	535	0	525
7.5311	0	535	0	525
7.5421	0	535	0	525
7.553	0	535	0	525
7.564	0	535	0	525
7.575	0	535	0	525
7.5859	0	535	0	525
7.5969	0	535	0	525
7.6078	0	535	0	525
7.6188	0	535	0	525
7.6298	0	535	0	525
7.6407	0	535	0	525
7.6517	0	535	0	525
7.6626	0	535	0	525
7.6736	0	535	0	525
7.6846	0	535	0	525
7.6955	0	535	0	525
7.7065	0	535	0	525
7.7175	0	535	0	525
7.7284	0	535	0	525
7.7394	0	535	0	525
7.7503	0	535	0	525
7.7613	0	535	0	525
7.7723	0	535	0	525
7.7832	0	535	0	525
7.7942	0	535	0	525
7.8052	0	535	0	525
7.8161	0	535	0	525
7.8271	0	535	0	525
7.838	0	535	0	525
7.849	0	535	0	525
7.86	0	535	0	525
7.8709	0	535	0	525
7.8819	0	535	0	525
7.8929	0	535	0	525
7.9038	0	535	0	525
7.9148	0	535	0	525
7.9257	0	535	0	525
7.9367	0	535	0	525
7.9477	0	535	0	525
7.9586	0	535	0	525
7.9696	0	535	0	525
7.9806	0	535	0	525
7.9915	0	535	0	525
8.0025	0	535	0	525
8.0134	0	535	0	525
8.0244	0	535	0	525
8.0354	0	535	0	525
8.0463	0	535	0	525
8.0573	0	535	0	525
8.0683	0	535	0	525
8.0792	0	535	0	525
8.0902	0	535	0	525
8.1011	0	535	0	525
8.1121	0	535	0	525
8.1231	0	535	0	525
8.134	0	535	0	525
8.145	0	535	0	525
8.156	0	535	0	525
8.1669	0	535	0	525
8.1779	0	535	0	525
8.1888	0	535	0	525
8.1998	0	535	0	525
8.2108	0	535	0	525
8.2217	0	535	0	525
8.2327	0	535	0	525
8.2437	0	535	0	525
8.2546	0	535	0	525
8.2656	0	535	0	525
8.2765	0	535	0	525
8.2875	0	535	0	525
8.2985	0	535	0	525
8.3094	0	535	0	525
8.3204	0	535	0	525
8.3313	0	535	0	525
8.3423	0	535	0	525
8.3533	0	535	0	525
8.3642	0	535	0	525
8.3752	0	535	0	525
8.3862	0	535	0	525
8.3971	0	535	0	525
8.4081	0	535	0	525
8.419	0	535	0	525
8.43	0	535	0	525
8.441	0	535	0	525
8.4519	0	535	0	525
8.4629	0	535	0	525
8.4739	0	535	0	525
8.4848	0	535	0	525
8.4958	0	535	0	525
8.5067	0	535	0	525
8.5177	0	535	0	525
8.5287	0	535	0	525
8.5396	0	535	0	525
8.5506	0	535	0	525
8.5616	0	535	0	525
8.5725	0	535	0	525
8.5835	0	535	0	525
8.5944	0	535	0	525
8.6054	0	535	0	525
8.6164	0	535	0	525
8.6273	0	535	0	525
8.6383	0	535	0	525
8.6493	0	535	0	525
8.6602	0	535	0	525
8.6712	0	535	0	525
8.6821	0	535	0	525
8.6931	0	535	0	525
8.7041	0	535	0	525
8.715	0	535	0	525
8.726	0	535	0	525
8.737	0	535	0	525
8.7479	0	535	0	525
8.7589	0	535	0	525
8.7698	0	535	0	525
8.7808	0	535	0	525
8.7918	0	535	0	525
8.8027	0	535	0	525
8.8137	0	535	0	525
8.8247	0	535	0	525
8.8356	0	535	0	525
8.8466	0	535	0	525
8.8575	0	535	0	525
8.8685	0	535	0	525
8.8795	0	535	0	525
8.8904	0	535	0	525
8.9014	0	535	0	525
8.9124	0	535	0	525
8.9233	0	535	0	525
8.9343	0	535	0	525
8.9452	0	535	0	525
8.9562	0	535	0	525
8.9672	0	535	0	525
8.9781	0	535	0	525
8.9891	0	535	0	525
9	0	535	0	525
9.011	0	535	0	525
9.022	0	535	0	525
9.0329	0	535	0	525
9.0439	0	535	0	525
9.0549	0	535	0	525
9.0658	0	535	0	525
9.0768	0	535	0	525
9.0877	0	535	0	525
9.0987	0	535	0	525
9.1097	0	535	0	525
9.1206	0	535	0	525
9.1316	0	535	0	525
9.1426	0	535	0	525
9.1535	0	535	0	525
9.1645	0	535	0	525
9.1754	0	535	0	525
9.1864	0	535	0	525
9.1974	0	535	0	525
9.2083	0	535	0	525
9.2193	0	535	0	525
9.2303	0	535	0	525
9.2412	0	535	0	525
9.2522	0	535	0	525
9.2631	0	535	0	525
9.2741	0	535	0	525
9.2851	0	535	0	525
9.296	0	535	0	525
9.307	0	535	0	525
9.318	0	535	0	525
9.3289	0	535	0	525
9.3399	0	535	0	525
9.3508	0	535	0	525
9.3618	0	535	0	525
9.3728	0	535	0	525
9.3837	0	535	0	525
9.3947	0	535	0	525
9.4057	0	535	0	525
9.4166	0	535	0	525
9.4276	0	535	0	525
9.4385	0	535	0	525
9.4495	0	535	0	525
9.4605	0	535	0	525
9.4714	0	535	0	525
9.4824	0	535	0	525
9.4934	0	535	0	525
9.5043	0	535	0	525
9.5153	0	535	0	525
9.5262	0	535	0	525
9.5372	0	535	0	525
9.5482	0	535	0	525
9.5591	0	535	0	525
9.5701	0	535	0	525
9.5811	0	535	0	525
9.592	0	535	0	525
9.603	0	535	0	525
9.6139	0	535	0	525
9.6249	0	535	0	525
9.6359	0	535	0	525
9.6468	0	535	0	525
9.6578	0	535	0	525
9.6688	0	535	0	525
9.6797	0	535	0	525
9.6907	0	535	0	525
9.7016	0	535	0	525
9.7126	0	535	0	525
9.7236	0	535	0	525
9.7345	0	535	0	525
9.7455	0	535	0	525
9.7564	0	535	0	525
9.7674	0	535	0	525
9.7784	0	535	0	525
9.7893	0	535	0	525
9.8003	0	535	0	525
9.8113	0	535	0	525
9.8222	0	535	0	525
9.8332	0	535	0	525
9.8441	0	535	0	525
9.8551	0	535	0	525
9.8661	0	535	0	525
9.877	0	535	0	525
9.888	0	535	0	525
9.899	0	535	0	525
9.9099	0	535	0	525
9.9209	0	535	0	525
9.9318	0	535	0	525
9.9428	0	535	0	525
9.9538	0	535	0	525
9.9647	0	535	0	525
9.9757	0	535	0	525
9.9867	0	535	0	525
9.9976	0	535	0	525
10.0086	0	535	0	525
10.0195	0	535	0	525
10.0305	0	535	0	525
10.0415	0	535	0	525
10.0524	0	535	0	525
10.0634	0	535	0	525
10.0744	0	535	0	525
10.0853	0	535	0	525
10.0963	0	535	0	525
10.1072	0	535	0	525
10.1182	0	535	0	525
10.1292	0	535	0	525
10.1401	0	535	0	525
10.1511	0	535	0	525
10.1621	0	535	0	525
10.173	0	535	0	525
10.184	0	535	0	525
10.1949	0	535	0	525
10.2059	0	535	0	525
10.2169	0	535	0	525
10.2278	0	535	0	525
10.2388	0	535	0	525
10.2498	0	535	0	525
10.2607	0	535	0	525
10.2717	0	535	0	525
10.2826	0	535	0	525
10.2936	0	535	0	525
10.3046	0	535	0	525
10.3155	0	535	0	525
10.3265	0	535	0	525
10.3375	0	535	0	525
10.3484	0	535	0	525
10.3594	0	535	0	525
10.3703	0	535	0	525
10.3813	0	535	0	525
10.3923	0	535	0	525
10.4032	0	535	0	525
10.4142	0	535	0	525
10.4251	0	535	0	525
10.4361	0	535	0	525
10.4471	0	535	0	525
10.458	0	535	0	525
10.469	0	535	0	525
10.48	0	535	0	525
10.4909	0	535	0	525
10.5019	0	535	0	525
10.5128	0	535	0	525
10.5238	0	535	0	525
10.5348	0	535	0	525
10.5457	0	535	0	525
10.5567	0	535	0	525
10.5677	0	535	0	525
10.5786	0	535	0	525
10.5896	0	535	0	525
10.6005	0	535	0	525
10.6115	0	535	0	525
10.6225	0	535	0	525
10.6334	0	535	0	525
10.6444	0	535	0	525
10.6554	0	535	0	525
10.6663	0	535	0	525
10.6773	0	535	0	525
10.6882	0	535	0	525
10.6992	0	535	0	525
10.7102	0	535	0	525
10.7211	0	535	0	525
10.7321	0	535	0	525
10.7431	0	535	0	525
10.754	0	535	0	525
10.765	0	535	0	525
10.7759	0	535	0	525
10.7869	0	535	0	525
10.7979	0	535	0	525
10.8088	0	535	0	525
10.8198	0	535	0	525
10.8308	0	535	0	525
10.8417	0	535	0	525
10.8527	0	535	0	525
10.8636	0	535	0	525
10.8746	0	535	0	525
10.8856	0	535	0	525
10.8965	0	535	0	525
10.9075	0	535	0	525
10.9185	0	535	0	525
10.9294	0	535	0	525
10.9404	0	535	0	525
10.9513	0	535	0	525
10.9623	0	535	0	525
10.9733	0	535	0	525
10.9842	0	535	0	525
10.9952	0	535	0	525
11.0062	0	535	0	525
11.0171	0	535	0	525
11.0281	0	535	0	525
11.039	0	535	0	525
11.05	0	535	0	525
11.061	0	535	0	525
11.0719	0	535	0	525
11.0829	0	535	0	525
11.0938	0	535	0	525
11.1048	0	535	0	525
11.1158	0	535	0	525
11.1267	0	535	0	525
11.1377	0	535	0	525
11.1487	0	535	0	525
11.1596	0	535	0	525
11.1706	0	535	0	525
11.1815	0	535	0	525
11.1925	0	535	0	525
11.2035	0	535	0	525
11.2144	0	535	0	525
11.2254	0	535	0	525
11.2364	0	535	0	525
11.2473	0	535	0	525
11.2583	0	535	0	525
11.2692	0	535	0	525
11.2802	0	535	0	525
11.2912	0	535	0	525
11.3021	0	535	0	525
11.3131	0	535	0	525
11.3241	0	535	0	525
11.335	0	535	0	525
11.346	0	535	0	525
11.3569	0	535	0	525
11.3679	0	535	0	525
11.3789	0	535	0	525
11.3898	0	535	0	525
11.4008	0	535	0	525
11.4118	0	535	0	525
11.4227	0	535	0	525
11.4337	0	535	0	525
11.4446	0	535	0	525
11.4556	0	535	0	525
11.4666	0	535	0	525
11.4775	0	535	0	525
11.4885	0	535	0	525
11.4995	0	535	0	525
11.5104	0	535	0	525
11.5214	0	535	0	525
11.5323	0	535	0	525
11.5433	0	535	0	525
11.5543	0	535	0	525
11.5652	0	535	0	525
11.5762	0	535	0	525
11.5872	0	535	0	525
11.5981	0	535	0	525
11.6091	0	535	0	525
11.62	0	535	0	525
11.631	0	535	0	525
11.642	0	535	0	525
11.6529	0	535	0	525
11.6639	0	535	0	525
11.6749	0	535	0	525
11.6858	0	535	0	525
11.6968	0	535	0	525
11.7077	0	535	0	525
11.7187	0	535	0	525
11.7297	0	535	0	525
11.7406	0	535	0	525
11.7516	0	535	0	525
11.7625	0	535	0	525
11.7735	0	535	0	525
11.7845	0	535	0	525
11.7954	0	535	0	525
11.8064	0	535	0	525
11.8174	0	535	0	525
11.8283	0	535	0	525
11.8393	0	535	0	525
11.8502	0	535	0	525
11.8612	0	535	0	525
11.8722	0	535	0	525
11.8831	0	535	0	525
11.8941	0	535	0	525
11.9051	0	535	0	525
11.916	0	535	0	525
11.927	0	535	0	525
11.9379	0	535	0	525
11.9489	0	535	0	525
11.9599	0	535	0	525
11.9708	0	535	0	525
11.9818	0	535	0	525
11.9928	0	535	0	525
12.0037	0	535	0	525
12.0147	0	535	0	525
12.0256	0	535	0	525
12.0366	0	535	0	525
12.0476	0	535	0	525
12.0585	0	535	0	525
12.0695	0	535	0	525
12.0805	0	535	0	525
12.0914	0	535	0	525
12.1024	0	535	0	525
12.1133	0	535	0	525
12.1243	0	535	0	525
12.1353	0	535	0	525
12.1462	0	535	0	525
12.1572	0	535	0	525
12.1682	0	535	0	525
12.1791	0	535	0	525
12.1901	0	535	0	525
12.201	0	535	0	525
12.212	0	535	0	525
12.223	0	535	0	525
12.2339	0	535	0	525
12.2449	0	535	0	525
12.2559	0	535	0	525
12.2668	0	535	0	525
12.2778	0	535	0	525
12.2887	0	535	0	525
12.2997	0	535	0	525
12.3107	0	535	0	525
12.3216	0	535	0	525
12.3326	0	535	0	525
12.3436	0	535	0	525
12.3545	0	535	0	525
12.3655	0	535	0	525
12.3764	0	535	0	525
12.3874	0	535	0	525
12.3984	0	535	0	525
12.4093	0	535	0	525
12.4203	0	535	0	525
12.4312	0	535	0	525
12.4422	0	535	0	525
12.4532	0	535	0	525
12.4641	0	535	0	525
12.4751	0	535	0	525
12.4861	0	535	0	525
12.497	0	535	0	525
12.508	0	535	0	525
12.5189	0	535	0	525
12.5299	0	535	0	525
12.5409	0	535	0	525
12.5518	0	535	0	525
12.5628	0	535	0	525
12.5738	0	535	0	525
12.5847	0	535	0	525
12.5957	0	535	0	525
12.6066	0	535	0	525
12.6176	0	535	0	525
12.6286	0	535	0	525
12.6395	0	535	0	525
12.6505	0	535	0	525
12.6615	0	535	0	525
12.6724	0	535	0	525
12.6834	0	535	0	525
12.6943	0	535	0	525
12.7053	0	535	0	525
12.7163	0	535	0	525
12.7272	0	535	0	525
12.7382	0	535	0	525
12.7492	0	535	0	525
12.7601	0	535	0	525
12.7711	0	535	0	525
12.782	0	535	0	525
12.793	0	535	0	525
12.804	0	535	0	525
12.8149	0	535	0	525
12.8259	0	535	0	525
12.8369	0	535	0	525
12.8478	0	535	0	525
12.8588	0	535	0	525
12.8697	0	535	0	525
12.8807	0	535	0	525
12.8917	0	535	0	525
12.9026	0	535	0	525
12.9136	0	535	0	525
12.9246	0	535	0	525
12.9355	0	535	0	525
12.9465	0	535	0	525
12.9574	0	535	0	525
12.9684	0	535	0	525
12.9794	0	535	0	525
12.9903	0	535	0	525
13.0013	0	535	0	525
13.0123	0	535	0	525
13.0232	0	535	0	525
13.0342	0	535	0	525
13.0451	0	535	0	525
13.0561	0	535	0	525
13.0671	0	535	0	525
13.078	0	535	0	525
13.089	0	535	0	525
13.1	0	535	0	525
13.1109	0	535	0	525
13.1219	0	535	0	525
13.1328	0	535	0	525
13.1438	0	535	0	525
13.1548	0	535	0	525
13.1657	0	535	0	525
13.1767	0	535	0	525
13.1876	0	535	0	525
13.1986	0	535	0	525
13.2096	0	535	0	525
13.2205	0	535	0	525
13.2315	0	535	0	525
13.2425	0	535	0	525
13.2534	0	535	0	525
13.2644	0	535	0	525
13.2753	0	535	0	525
13.2863	0	535	0	525
13.2973	0	535	0	525
13.3082	0	535	0	525
13.3192	0	535	0	525
13.3302	0	535	0	525
13.3411	0	535	0	525
13.3521	0	535	0	525
13.363	0	535	0	525
13.374	0	535	0	525
13.385	0	535	0	525
13.3959	0	535	0	525
13.4069	0	535	0	525
13.4179	0	535	0	525
13.4288	0	535	0	525
13.4398	0	535	0	525
13.4507	0	535	0	525
13.4617	0	535	0	525
13.4727	0	535	0	525
13.4836	0	535	0	525
13.4946	0	535	0	525
13.5056	0	535	0	525
13.5165	0	535	0	525
13.5275	0	535	0	525
13.5384	0	535	0	525
13.5494	0	535	0	525
13.5604	0	535	0	525
13.5713	0	535	0	525
13.5823	0	535	0	525
13.5933	0	535	0	525
13.6042	0	535	0	525
13.6152	0	535	0	525
13.6261	0	535	0	525
13.6371	0	535	0	525
13.6481	0	535	0	525
13.659	0	535	0	525
13.67	0	535	0	525
13.681	0	535	0	525
13.6919	0	535	0	525
13.7029	0	535	0	525
13.7138	0	535	0	525
13.7248	0	535	0	525
13.7358	0	535	0	525
13.7467	0	535	0	525
13.7577	0	535	0	525
13.7687	0	535	0	525
13.7796	0	535	0	525
13.7906	0	535	0	525
13.8015	0	535	0	525
13.8125	0	535	0	525
13.8235	0	535	0	525
13.8344	0	535	0	525
13.8454	0	535	0	525
13.8563	0	535	0	525
13.8673	0	535	0	525
13.8783	0	535	0	525
13.8892	0	535	0	525
13.9002	0	535	0	525
13.9112	0	535	0	525
13.9221	0	535	0	525
13.9331	0	535	0	525
13.944	0	535	0	525
13.955	0	535	0	525
13.966	0	535	0	525
13.9769	0	535	0	525
13.9879	0	535	0	525
13.9989	0	535	0	525
14.0098	0	535	0	525
14.0208	0	535	0	525
14.0317	0	535	0	525
14.0427	0	535	0	525
14.0537	0	535	0	525
14.0646	0	535	0	525
14.0756	0	535	0	525
14.0866	0	535	0	525
14.0975	0	535	0	525
14.1085	0	535	0	525
14.1194	0	535	0	525
14.1304	0	535	0	525
14.1414	0	535	0	525
14.1523	0	535	0	525
14.1633	0	535	0	525
14.1743	0	535	0	525
14.1852	0	535	0	525
14.1962	0	535	0	525
14.2071	0	535	0	525
14.2181	0	535	0	525
14.2291	0	535	0	525
14.24	0	535	0	525
14.251	0	535	0	525
14.262	0	535	0	525
14.2729	0	535	0	525
14.2839	0	535	0	525
14.2948	0	535	0	525
14.3058	0	535	0	525
14.3168	0	535	0	525
14.3277	0	535	0	525
14.3387	0	535	0	525
14.3497	0	535	0	525
14.3606	0	535	0	525
14.3716	0	535	0	525
14.3825	0	535	0	525
14.3935	0	535	0	525
14.4045	0	535	0	525
14.4154	0	535	0	525
14.4264	0	535	0	525
14.4374	0	535	0	525
14.4483	0	535	0	525
14.4593	0	535	0	525
14.4702	0	535	0	525
14.4812	0	535	0	525
14.4922	0	535	0	525
14.5031	0	535	0	525
14.5141	0	535	0	525
14.525	0	535	0	525
14.536	0	535	0	525
14.547	0	535	0	525
14.5579	0	535	0	525
14.5689	0	535	0	525
14.5799	0	535	0	525
14.5908	0	535	0	525
14.6018	0	535	0	525
14.6127	0	535	0	525
14.6237	0	535	0	525
14.6347	0	535	0	525
14.6456	0	535	0	525
14.6566	0	535	0	525
14.6676	0	535	0	525
14.6785	0	535	0	525
14.6895	0	535	0	525
14.7004	0	535	0	525
14.7114	0	535	0	525
14.7224	0	535	0	525
14.7333	0	535	0	525
14.7443	0	535	0	525
14.7553	0	535	0	525
14.7662	0	535	0	525
14.7772	0	535	0	525
14.7881	0	535	0	525
14.7991	0	535	0	525
14.8101	0	535	0	525
14.821	0	535	0	525
14.832	0	535	0	525
14.843	0	535	0	525
14.8539	0	535	0	525
14.8649	0	535	0	525
14.8758	0	535	0	525
14.8868	0	535	0	525
14.8978	0	535	0	525
14.9087	0	535	0	525
14.9197	0	535	0	525
14.9307	0	535	0	525
14.9416	0	535	0	525
14.9526	0	535	0	525
14.9635	0	535	0	525
14.9745	0	535	0	525
14.9855	0	535	0	525
14.9964	0	535	0	525
15.0074	0	535	0	525
15.0184	0	535	0	525
15.0293	0	535	0	525
15.0403	0	535	0	525
15.0512	0	535	0	525
15.0622	0	535	0	525
15.0732	0	535	0	525
15.0841	0	535	0	525
15.0951	0	535	0	525
15.1061	0	535	0	525
15.117	0	535	0	525
15.128	0	535	0	525
15.1389	0	535	0	525
15.1499	0	535	0	525
15.1609	0	535	0	525
15.1718	0	535	0	525
15.1828	0	535	0	525
15.1938	0	535	0	525
15.2047	0	535	0	525
15.2157	0	535	0	525
15.2266	0	535	0	525
15.2376	0	535	0	525
15.2486	0	535	0	525
15.2595	0	535	0	525
15.2705	0	535	0	525
15.2814	0	535	0	525
15.2924	0	535	0	525
15.3034	0	535	0	525
15.3143	0	535	0	525
15.3253	0	535	0	525
15.3363	0	535	0	525
15.3472	0	535	0	525
15.3582	0	535	0	525
15.3691	0	535	0	525
15.3801	0	535	0	525
15.3911	0	535	0	525
15.402	0	535	0	525
15.413	0	535	0	525
15.424	0	535	0	525
15.4349	0	535	0	525
15.4459	0	535	0	525
15.4568	0	535	0	525
15.4678	0	535	0	525
15.4788	0	535	0	525
15.4897	0	535	0	525
15.5007	0	535	0	525
15.5117	0	535	0	525
15.5226	0	535	0	525
15.5336	0	535	0	525
15.5445	0	535	0	525
15.5555	0	535	0	525
15.5665	0	535	0	525
15.5774	0	535	0	525
15.5884	0	535	0	525
15.5994	0	535	0	525
15.6103	0	535	0	525
15.6213	0	535	0	525
15.6322	0	535	0	525
15.6432	0	535	0	525
15.6542	0	535	0	525
15.6651	0	535	0	525
15.6761	0	535	0	525
15.6871	0	535	0	525
15.698	0	535	0	525
15.709	0	535	0	525
15.7199	0	535	0	525
15.7309	0	535	0	525
15.7419	0	535	0	525
15.7528	0	535	0	525
15.7638	0	535	0	525
15.7748	0	535	0	525
15.7857	0	535	0	525
15.7967	0	535	0	525
15.8076	0	535	0	525
15.8186	0	535	0	525
15.8296	0	535	0	525
15.8405	0	535	0	525
15.8515	0	535	0	525
15.8625	0	535	0	525
15.8734	0	535	0	525
15.8844	0	535	0	525
15.8953	0	535	0	525
15.9063	0	535	0	525
15.9173	0	535	0	525
15.9282	0	535	0	525
15.9392	0	535	0	525
15.9501	0	535	0	525
15.9611	0	535	0	525
15.9721	0	535	0	525
15.983	0	535	0	525
15.994	0	535	0	525
16.005	0	535	0	525
16.0159	0	535	0	525
16.0269	0	535	0	525
16.0378	0	535	0	525
16.0488	0	535	0	525
16.0598	0	535	0	525
16.0707	0	535	0	525
16.0817	0	535	0	525
16.0927	0	535	0	525
16.1036	0	535	0	525
16.1146	0	535	0	525
16.1255	0	535	0	525
16.1365	0	535	0	525
16.1475	0	535	0	525
16.1584	0	535	0	525
16.1694	0	535	0	525
16.1804	0	535	0	525
16.1913	0	535	0	525
16.2023	0	535	0	525
16.2132	0	535	0	525
16.2242	0	535	0	525
16.2352	0	535	0	525
16.2461	0	535	0	525
16.2571	0	535	0	525
16.2681	0	535	0	525
16.279	0	535	0	525
16.29	0	535	0	525
16.3009	0	535	0	525
16.3119	0	535	0	525
16.3229	0	535	0	525
16.3338	0	535	0	525
16.3448	0	535	0	525
16.3558	0	535	0	525
16.3667	0	535	0	525
16.3777	0	535	0	525
16.3886	0	535	0	525
16.3996	0	535	0	525
16.4106	0	535	0	525
16.4215	0	535	0	525
16.4325	0	535	0	525
16.4435	0	535	0	525
16.4544	0	535	0	525
16.4654	0	535	0	525
16.4763	0	535	0	525
16.4873	0	535	0	525
16.4983	0	535	0	525
16.5092	0	535	0	525
16.5202	0	535	0	525
16.5312	0	535	0	525
16.5421	0	535	0	525
16.5531	0	535	0	525
16.564	0	535	0	525
16.575	0	535	0	525
16.586	0	535	0	525
16.5969	0	535	0	525
16.6079	0	535	0	525
16.6188	0	535	0	525
16.6298	0	535	0	525
16.6408	0	535	0	525
16.6517	0	535	0	525
16.6627	0	535	0	525
16.6737	0	535	0	525
16.6846	0	535	0	525
16.6956	0	535	0	525
16.7065	0	535	0	525
16.7175	0	535	0	525
16.7285	0	535	0	525
16.7394	0	535	0	525
16.7504	0	535	0	525
16.7614	0	535	0	525
16.7723	0	535	0	525
16.7833	0	535	0	525
16.7942	0	535	0	525
16.8052	0	535	0	525
16.8162	0	535	0	525
16.8271	0	535	0	525
16.8381	0	535	0	525
16.8491	0	535	0	525
16.86	0	535	0	525
16.871	0	535	0	525
16.8819	0	535	0	525
16.8929	0	535	0	525
16.9039	0	535	0	525
16.9148	0	535	0	525
16.9258	0	535	0	525
16.9368	0	535	0	525
16.9477	0	535	0	525
16.9587	0	535	0	525
16.9696	0	535	0	525
16.9806	0	535	0	525
16.9916	0	535	0	525
17.0025	0	535	0	525
17.0135	0	535	0	525
17.0245	0	535	0	525
17.0354	0	535	0	525
17.0464	0	535	0	525
17.0573	0	535	0	525
17.0683	0	535	0	525
17.0793	0	535	0	525
17.0902	0	535	0	525
17.1012	0	535	0	525
17.1122	0	535	0	525
17.1231	0	535	0	525
17.1341	0	535	0	525
17.145	0	535	0	525
17.156	0	535	0	525
17.167	0	535	0	525
17.1779	0	535	0	525
17.1889	0	535	0	525
17.1999	0	535	0	525
17.2108	0	535	0	525
17.2218	0	535	0	525
17.2327	0	535	0	525
17.2437	0	535	0	525
17.2547	0	535	0	525
17.2656	0	535	0	525
17.2766	0	535	0	525
17.2875	0	535	0	525
17.2985	0	535	0	525
17.3095	0	535	0	525
17.3204	0	535	0	525
17.3314	0	535	0	525
17.3424	0	535	0	525
17.3533	0	535	0	525
17.3643	0	535	0	525
17.3752	0	535	0	525
17.3862	0	535	0	525
17.3972	0	535	0	525
17.4081	0	535	0	525
17.4191	0	535	0	525
17.4301	0	535	0	525
17.441	0	535	0	525
17.452	0	535	0	525
17.4629	0	535	0	525
17.4739	0	535	0	525
17.4849	0	535	0	525
17.4958	0	535	0	525
17.5068	0	535	0	525
17.5178	0	535	0	525
17.5287	0	535	0	525
17.5397	0	535	0	525
17.5506	0	535	0	525
17.5616	0	535	0	525
17.5726	0	535	0	525
17.5835	0	535	0	525
17.5945	0	535	0	525
17.6055	0	535	0	525
17.6164	0	535	0	525
17.6274	0	535	0	525
17.6383	0	535	0	525
17.6493	0	535	0	525
17.6603	0	535	0	525
17.6712	0	535	0	525
17.6822	0	535	0	525
17.6932	0	535	0	525
17.7041	0	535	0	525
17.7151	0	535	0	525
17.726	0	535	0	525
17.737	0	535	0	525
17.748	0	535	0	525
17.7589	0	535	0	525
17.7699	0	535	0	525
17.7809	0	535	0	525
17.7918	0	535	0	525
17.8028	0	535	0	525
17.8137	0	535	0	525
17.8247	0	535	0	525
17.8357	0	535	0	525
17.8466	0	535	0	525
17.8576	0	535	0	525
17.8686	0	535	0	525
17.8795	0	535	0	525
17.8905	0	535	0	525
17.9014	0	535	0	525
17.9124	0	535	0	525
17.9234	0	535	0	525
17.9343	0	535	0	525
17.9453	0	535	0	525
17.9562	0	535	0	525
17.9672	0	535	0	525
17.9782	0	535	0	525
17.9891	0	535	0	525
18.0001	0	535	0	525
18.0111	0	535	0	525
18.022	0	535	0	525
18.033	0	535	0	525
18.0439	0	535	0	525
18.0549	0	535	0	525
18.0659	0	535	0	525
18.0768	0	535	0	525
18.0878	0	535	0	525
18.0988	0	535	0	525
18.1097	0	535	0	525
18.1207	0	535	0	525
18.1316	0	535	0	525
18.1426	0	535	0	525
18.1536	0	535	0	525
18.1645	0	535	0	525
18.1755	0	535	0	525
18.1865	0	535	0	525
18.1974	0	535	0	525
18.2084	0	535	0	525
18.2193	0	535	0	525
18.2303	0	535	0	525
18.2413	0	535	0	525
18.2522	0	535	0	525
18.2632	0	535	0	525
18.2742	0	535	0	525
18.2851	0	535	0	525
18.2961	0	535	0	525
18.307	0	535	0	525
18.318	0	535	0	525
18.329	0	535	0	525
18.3399	0	535	0	525
18.3509	0	535	0	525
18.3619	0	535	0	525
18.3728	0	535	0	525
18.3838	0	535	0	525
18.3947	0	535	0	525
18.4057	0	535	0	525
18.4167	0	535	0	525
18.4276	0	535	0	525
18.4386	0	535	0	525
18.4496	0	535	0	525
18.4605	0	535	0	525
18.4715	0	535	0	525
18.4824	0	535	0	525
18.4934	0	535	0	525
18.5044	0	535	0	525
18.5153	0	535	0	525
18.5263	0	535	0	525
18.5373	0	535	0	525
18.5482	0	535	0	525
18.5592	0	535	0	525
18.5701	0	535	0	525
18.5811	0	535	0	525
18.5921	0	535	0	525
18.603	0	535	0	525
18.614	0	535	0	525
18.625	0	535	0	525
18.6359	0	535	0	525
18.6469	0	535	0	525
18.6578	0	535	0	525
18.6688	0	535	0	525
18.6798	0	535	0	525
18.6907	0	535	0	525
18.7017	0	535	0	525
18.7126	0	535	0	525
18.7236	0	535	0	525
18.7346	0	535	0	525
18.7455	0	535	0	525
18.7565	0	535	0	525
18.7675	0	535	0	525
18.7784	0	535	0	525
18.7894	0	535	0	525
18.8003	0	535	0	525
18.8113	0	535	0	525
18.8223	0	535	0	525
18.8332	0	535	0	525
18.8442	0	535	0	525
18.8552	0	535	0	525
18.8661	0	535	0	525
18.8771	0	535	0	525
18.888	0	535	0	525
18.899	0	535	0	525
18.91	0	535	0	525
18.9209	0	535	0	525
18.9319	0	535	0	525
18.9429	0	535	0	525
18.9538	0	535	0	525
18.9648	0	535	0	525
18.9757	0	535	0	525
18.9867	0	535	0	525
18.9977	0	535	0	525
19.0086	0	535	0	525
19.0196	0	535	0	525
19.0306	0	535	0	525
19.0415	0	535	0	525
19.0525	0	535	0	525
19.0634	0	535	0	525
19.0744	0	535	0	525
19.0854	0	535	0	525
19.0963	0	535	0	525
19.1073	0	535	0	525
19.1183	0	535	0	525
19.1292	0	535	0	525
19.1402	0	535	0	525
19.1511	0	535	0	525
19.1621	0	535	0	525
19.1731	0	535	0	525
19.184	0	535	0	525
19.195	0	535	0	525
19.206	0	535	0	525
19.2169	0	535	0	525
19.2279	0	535	0	525
19.2388	0	535	0	525
19.2498	0	535	0	525
19.2608	0	535	0	525
19.2717	0	535	0	525
19.2827	0	535	0	525
19.2937	0	535	0	525
19.3046	0	535	0	525
19.3156	0	535	0	525
19.3265	0	535	0	525
19.3375	0	535	0	525
19.3485	0	535	0	525
19.3594	0	535	0	525
19.3704	0	535	0	525
19.3813	0	535	0	525
19.3923	0	535	0	525
19.4033	0	535	0	525
19.4142	0	535	0	525
19.4252	0	535	0	525
19.4362	0	535	0	525
19.4471	0	535	0	525
19.4581	0	535	0	525
19.469	0	535	0	525
19.48	0	535	0	525
19.491	0	535	0	525
19.5019	0	535	0	525
19.5129	0	535	0	525
19.5239	0	535	0	525
19.5348	0	535	0	525
19.5458	0	535	0	525
19.5567	0	535	0	525
19.5677	0	535	0	525
19.5787	0	535	0	525
19.5896	0	535	0	525
19.6006	0	535	0	525
19.6116	0	535	0	525
19.6225	0	535	0	525
19.6335	0	535	0	525
19.6444	0	535	0	525
19.6554	0	535	0	525
19.6664	0	535	0	525
19.6773	0	535	0	525
19.6883	0	535	0	525
19.6993	0	535	0	525
19.7102	0	535	0	525
19.7212	0	535	0	525
19.7321	0	535	0	525
19.7431	0	535	0	525
19.7541	0	535	0	525
19.765	0	535	0	525
19.776	0	535	0	525
19.787	0	535	0	525
19.7979	0	535	0	525
19.8089	0	535	0	525
19.8198	0	535	0	525
19.8308	0	535	0	525
19.8418	0	535	0	525
19.8527	0	535	0	525
19.8637	0	535	0	525
19.8747	0	535	0	525
19.8856	0	535	0	525
19.8966	0	535	0	525
19.9075	0	535	0	525
19.9185	0	535	0	525
19.9295	0	535	0	525
19.9404	0	535	0	525
19.9514	0	535	0	525
19.9624	0	535	0	525
19.9733	0	535	0	525
19.9843	0	535	0	525
19.9952	0	535	0	525
20.0062	0	535	0	525
20.0172	0	535	0	525
20.0281	0	535	0	525
20.0391	0	535	0	525
20.05	0	535	0	525
20.061	0	535	0	525
20.072	0	535	0	525
20.0829	-0.93	535	-0.64	525
20.0939	-0.95	535	-0.36	525
20.1049	-1.31	535	-0.08	525
20.1158	-1.32	541	-0.43	525
20.1268	-1.23	542	-0.63	525
20.1377	-0.6	543	-1.01	525
20.1487	-0.03	538	-0.81	531
20.1597	0.43	538	-0.65	526
20.1706	0.63	538	-0.68	526
20.1816	0.6	538	-0.56	526
20.1926	0.41	538	-0.49	526
20.2035	0.31	538	-0.62	526
20.2145	0	538	-0.34	526
20.2254	-0.17	538	-0.39	526
20.2364	-0.56	538	-0.07	526
20.2474	-0.44	538	0.13	526
20.2583	-0.57	538	0.21	526
20.2693	0.11	538	0.58	526
20.2803	0.56	538	0.23	526
20.2912	0.87	538	0.2	526
20.3022	1.11	538	0.64	526
20.3131	1.48	532	0.44	526
20.3241	0.5	531	0.8	526
20.3351	-0.4	536	0.5	526
20.346	-1.25	536	0.15	526
20.357	-1.43	542	0.08	526
20.368	-0.87	543	-0.18	526
20.3789	0.35	538	0.03	526
20.3899	0.49	538	0.15	526
20.4008	0.63	538	-0.1	526
20.4118	0.47	538	0.17	526
20.4228	0.12	538	0.18	526
20.4337	0.28	538	0.04	526
20.4447	0.85	538	-0.57	526
20.4557	0.36	538	-0.52	526
20.4666	0.33	538	-0.5	526
20.4776	0.18	538	-0.31	526
20.4885	0.47	538	-0.04	526
20.4995	0.69	538	-0.04	526
20.5105	0.5	538	-0.26	526
20.5214	0.45	538	-0.06	526
20.5324	-0.19	538	-0.59	526
20.5434	-0.36	538	-0.53	526
20.5543	-0.4	538	-0.33	526
20.5653	-0.23	538	-0.69	526
20.5762	-0.06	538	-0.85	526
20.5872	0	538	-0.62	526
20.5982	0.14	538	-0.67	526
20.6091	-0.26	538	-0.77	526
20.6201	-0.27	538	-0.87	526
20.6311	-0.08	538	-0.59	526
20.642	0.01	538	-0.33	526
20.653	0.3	538	-0.27	526
20.6639	0.37	538	-0.58	526
20.6749	-0.01	538	-0.51	526
20.6859	0.32	538	0.05	526
20.6968	0.49	538	-0.05	526
20.7078	0.26	538	-0.2	526
20.7188	0.28	538	-0.19	526
20.7297	0.17	538	-0.67	526
20.7407	0.39	538	-0.42	526
20.7516	0.4	538	-0.65	526
20.7626	0.53	538	-0.5	526
20.7736	0.37	538	-0.46	526
20.7845	0.11	538	-0.39	526
20.7955	-0.04	538	-0.44	526
20.8064	0.08	538	-0.06	526
20.8174	0.03	538	-0.6	526
20.8284	-0.13	538	-0.71	526
20.8393	0.14	538	-0.64	526
20.8503	0.3	538	-0.35	526
20.8613	0.27	538	0.05	526
20.8722	0.22	538	0.08	526
20.8832	0.3	538	0.1	526
20.8941	0.23	538	0.22	526
20.9051	0	538	0.05	526
20.9161	0.14	538	0.18	526
20.927	0.26	538	0.5	526
20.938	-0.34	538	0.25	526
20.949	-0.15	538	0.65	526
20.9599	-0.28	538	0.02	526
20.9709	0.02	538	-0.03	526
20.9818	0.19	538	-0.21	526
20.9928	0.08	538	-0.8	526
21.0038	0.16	538	-1.08	526
21.0147	0.03	538	-1.07	532
21.0257	0.32	538	-0.72	534
21.0367	0.48	538	0.27	528
21.0476	0.74	538	1.54	528
21.0586	0.89	538	2.4	522
21.0695	0.25	538	1.65	514
21.0805	-0.01	538	-0.33	519
21.0915	0.17	538	-2.02	524
21.1024	0.12	538	-2.85	537
21.1134	-0.01	538	-2.39	539
21.1244	0.11	538	-0.61	542
21.1353	0.35	538	0.41	530
21.1463	0.02	538	2.13	530
21.1572	0.21	538	2.27	518
21.1682	-0.27	538	1.25	515
21.1792	-0.06	538	-0.99	520
21.1901	-0.58	538	-2.37	525
21.2011	-0.2	538	-2.24	538
21.2121	0.04	538	-1.15	540
21.223	-0.04	538	-0.4	536
21.234	-0.09	538	1.14	530
21.2449	-0.11	538	2.31	524
21.2559	-0.05	538	2.07	516
21.2669	0.03	538	0.41	514
21.2778	0.05	538	-1.84	525
21.2888	-0.11	538	-2.94	531
21.2998	0	538	-2.39	539
21.3107	0.01	538	-1.11	542
21.3217	-0.35	538	0.36	537
21.3326	-0.42	538	1.68	531
21.3436	-0.26	538	2.66	525
21.3546	-0.15	538	2.61	518
21.3655	-0.26	538	0.99	515
21.3765	-0.01	538	-0.95	526
21.3875	0.14	538	-2.05	526
21.3984	0.37	538	-2.13	539
21.4094	0.43	538	-1.07	542
21.4203	0.3	538	0.53	537
21.4313	0.52	538	2.63	531
21.4423	0.66	538	3.41	519
21.4532	0.63	538	3.55	510
21.4642	0.16	538	0.13	506
21.4751	-0.04	538	-3.71	523
21.4861	-0.07	538	-5.24	543
21.4971	-0.14	538	-4.85	560
21.508	-0.52	538	-2.14	559
21.519	-0.78	538	0.17	550
21.53	-0.62	538	2.3	538
21.5409	-0.31	538	4.46	525
21.5519	-0.32	538	5	510
21.5628	0.14	538	2.11	498
21.5738	-0.17	538	-3.14	513
21.5848	-0.16	538	-6.6	544
21.5957	-0.19	538	-6.18	568
21.6067	-0.23	538	-4.01	575
21.6177	-0.29	538	-1.95	568
21.6286	-0.12	538	0.5	552
21.6396	-0.45	538	2.38	546
21.6505	-0.56	538	3.61	532
21.6615	-0.59	538	4.68	524
21.6725	-0.28	538	3.96	514
21.6834	-0.42	538	1.48	516
21.6944	-0.5	538	-1.56	526
21.7054	-0.34	538	-2.88	538
21.7163	-0.66	538	-2	546
21.7273	-0.59	538	-0.61	548
21.7382	-0.11	538	1.18	537
21.7492	0.03	538	2.94	530
21.7602	0.49	538	4.02	523
21.7711	0.77	538	3.74	507
21.7821	1.11	538	0.78	510
21.7931	1.12	532	-3.62	526
21.804	0.89	531	-4.64	546
21.815	0.38	536	-4.05	556
21.8259	-0.75	536	-1.68	561
21.8369	-0.87	536	0.52	545
21.8479	-1.19	536	2.51	539
21.8588	-1.14	542	4.48	526
21.8698	-0.76	543	4.88	511
21.8808	-0.26	538	2.19	506
21.8917	0.47	538	-2.3	515
21.9027	0.56	538	-4.99	539
[truncated: 522 more rows]

## Sheet: ED Figure 2C
Time (s)	P = 14	P = 12	P = 10	P = 8	P = 7
0.011	0	0	0	0	0
0.022	0	0	0	0	0
0.0331	0	0	0	0	0
0.0441	0	0	0	0	0
0.0551	0	0	0	0	0
0.0661	0	0	0	0	0
0.0771	0	0	0	0	0
0.0881	0	0	0	0	0
0.0992	0	0	0	0	0
0.1102	0	0	0	0	0
0.1212	0	0	0	0	0
0.1322	0	0	0	0	0
0.1432	0	0	0	0	0
0.1542	0	0	0	0	0
0.1653	0	0	0	0	0
0.1763	0	0	0	0	0
0.1873	0	0	0	0	0
0.1983	0	0	0	0	0
0.2093	0	0	0	0	0
0.2203	0	0	0	0	0
0.2314	0	0	0	0	0
0.2424	0	0	0	0	0
0.2534	0	0	0	0	0
0.2644	0	0	0	0	0
0.2754	0	0	0	0	0
0.2865	0	0	0	0	0
0.2975	0	0	0	0	0
0.3085	0	0	0	0	0
0.3195	0	0	0	0	0
0.3305	0	0	0	0	0
0.3415	0	0	0	0	0
0.3526	0	0	0	0	0
0.3636	0	0	0	0	0
0.3746	0	0	0	0	0
0.3856	0	0	0	0	0
0.3966	0	0	0	0	0
0.4076	0	0	0	0	0
0.4187	0	0	0	0	0
0.4297	0	0	0	0	0
0.4407	0	0	0	0	0
0.4517	0	0	0	0	0
0.4627	0	0	0	0	0
0.4738	0	0	0	0	0
0.4848	0	0	0	0	0
0.4958	0	0	0	0	0
0.5068	0	0	0	0	0
0.5178	0	0	0	0	0
0.5288	0	0	0	0	0
0.5399	0	0	0	0	0
0.5509	0	0	0	0	0
0.5619	0	0	0	0	0
0.5729	0	0	0	0	0
0.5839	0	0	0	0	0
0.5949	0	0	0	0	0
0.606	0	0	0	0	0
0.617	0	0	0	0	0
0.628	0	0	0	0	0
0.639	0	0	0	0	0
0.65	0	0	0	0	0
0.661	0	0	0	0	0
0.6721	0	0	0	0	0
0.6831	0	0	0	0	0
0.6941	0	0	0	0	0
0.7051	0	0	0	0	0
0.7161	0	0	0	0	0
0.7272	0	0	0	0	0
0.7382	0	0	0	0	0
0.7492	0	0	0	0	0
0.7602	0	0	0	0	0
0.7712	0	0	0	0	0
0.7822	0	0	0	0	0
0.7933	0	0	0	0	0
0.8043	0	0	0	0	0
0.8153	0	0	0	0	0
0.8263	0	0	0	0	0
0.8373	0	0	0	0	0
0.8483	0	0	0	0	0
0.8594	0	0	0	0	0
0.8704	0	0	0	0	0
0.8814	0	0	0	0	0
0.8924	0	0	0	0	0
0.9034	0	0	0	0	0
0.9144	0	0	0	0	0
0.9255	0	0	0	0	0
0.9365	0	0	0	0	0
0.9475	0	0	0	0	0
0.9585	0	0	0	0	0
0.9695	0	0	0	0	0
0.9806	0	0	0	0	0
0.9916	0	0	0	0	0
1.0026	0	0	0	0	0
1.0136	0	0	0	0	0
1.0246	0	0	0	0	0
1.0356	0	0	0	0	0
1.0467	0	0	0	0	0
1.0577	0	0	0	0	0
1.0687	0	0	0	0	0
1.0797	0	0	0	0	0
1.0907	0	0	0	0	0
1.1017	0	0	0	0	0
1.1128	0	0	0	0	0
1.1238	0	0	0	0	0
1.1348	0	0	0	0	0
1.1458	0	0	0	0	0
1.1568	0	0	0	0	0
1.1679	0	0	0	0	0
1.1789	0	0	0	0	0
1.1899	0	0	0	0	0
1.2009	0	0	0	0	0
1.2119	0	0	0	0	0
1.2229	0	0	0	0	0
1.234	0	0	0	0	0
1.245	0	0	0	0	0
1.256	0	0	0	0	0
1.267	0	0	0	0	0
1.278	0	0	0	0	0
1.289	0	0	0	0	0
1.3001	0	0	0	0	0
1.3111	0	0	0	0	0
1.3221	0	0	0	0	0
1.3331	0	0	0	0	0
1.3441	0	0	0	0	0
1.3551	0	0	0	0	0
1.3662	0	0	0	0	0
1.3772	0	0	0	0	0
1.3882	0	0	0	0	0
1.3992	0	0	0	0	0
1.4102	0	0	0	0	0
1.4213	0	0	0	0	0
1.4323	0	0	0	0	0
1.4433	0	0	0	0	0
1.4543	0	0	0	0	0
1.4653	0	0	0	0	0
1.4763	0	0	0	0	0
1.4874	0	0	0	0	0
1.4984	0	0	0	0	0
1.5094	0	0	0	0	0
1.5204	0	0	0	0	0
1.5314	0	0	0	0	0
1.5424	0	0	0	0	0
1.5535	0	0	0	0	0
1.5645	0	0	0	0	0
1.5755	0	0	0	0	0
1.5865	0	0	0	0	0
1.5975	0	0	0	0	0
1.6086	0	0	0	0	0
1.6196	0	0	0	0	0
1.6306	0	0	0	0	0
1.6416	0	0	0	0	0
1.6526	0	0	0	0	0
1.6636	0	0	0	0	0
1.6747	0	0	0	0	0
1.6857	0	0	0	0	0
1.6967	0	0	0	0	0
1.7077	0	0	0	0	0
1.7187	0	0	0	0	0
1.7297	0	0	0	0	0
1.7408	0	0	0	0	0
1.7518	0	0	0	0	0
1.7628	0	0	0	0	0
1.7738	0	0	0	0	0
1.7848	0	0	0	0	0
1.7958	0	0	0	0	0
1.8069	0	0	0	0	0
1.8179	0	0	0	0	0
1.8289	0	0	0	0	0
1.8399	0	0	0	0	0
1.8509	0	0	0	0	0
1.862	0	0	0	0	0
1.873	0	0	0	0	0
1.884	0	0	0	0	0
1.895	0	0	0	0	0
1.906	0	0	0	0	0
1.917	0	0	0	0	0
1.9281	0	0	0	0	0
1.9391	0	0	0	0	0
1.9501	0	0	0	0	0
1.9611	0	0	0	0	0
1.9721	0	0	0	0	0
1.9831	0	0	0	0	0
1.9942	0	0	0	0	0
2.0052	0	0	0	0	0
2.0162	0	0	0	0	0
2.0272	0	0	0	0	0
2.0382	0	0	0	0	0
2.0492	0	0	0	0	0
2.0603	0	0	0	0	0
2.0713	0	0	0	0	0
2.0823	0	0	0	0	0
2.0933	0	0	0	0	0
2.1043	0	0	0	0	0
2.1154	0	0	0	0	0
2.1264	0	0	0	0	0
2.1374	0	0	0	0	0
2.1484	0	0	0	0	0
2.1594	0	0	0	0	0
2.1704	0	0	0	0	0
2.1815	0	0	0	0	0
2.1925	0	0	0	0	0
2.2035	0	0	0	0	0
2.2145	0	0	0	0	0
2.2255	0	0	0	0	0
2.2365	0	0	0	0	0
2.2476	0	0	0	0	0
2.2586	0	0	0	0	0
2.2696	0	0	0	0	0
2.2806	0	0	0	0	0
2.2916	0	0	0	0	0
2.3027	0	0	0	0	0
2.3137	0	0	0	0	0
2.3247	0	0	0	0	0
2.3357	0	0	0	0	0
2.3467	0	0	0	0	0
2.3577	0	0	0	0	0
2.3688	0	0	0	0	0
2.3798	0	0	0	0	0
2.3908	0	0	0	0	0
2.4018	0	0	0	0	0
2.4128	0	0	0	0	0
2.4238	0	0	0	0	0
2.4349	0	0	0	0	0
2.4459	0	0	0	0	0
2.4569	0	0	0	0	0
2.4679	0	0	0	0	0
2.4789	0	0	0	0	0
2.4899	0	0	0	0	0
2.501	0	0	0	0	0
2.512	0	0	0	0	0
2.523	0	0	0	0	0
2.534	0	0	0	0	0
2.545	0	0	0	0	0
2.5561	0	0	0	0	0
2.5671	0	0	0	0	0
2.5781	0	0	0	0	0
2.5891	0	0	0	0	0
2.6001	0	0	0	0	0
2.6111	0	0	0	0	0
2.6222	0	0	0	0	0
2.6332	0	0	0	0	0
2.6442	0	0	0	0	0
2.6552	0	0	0	0	0
2.6662	0	0	0	0	0
2.6772	0	0	0	0	0
2.6883	0	0	0	0	0
2.6993	0	0	0	0	0
2.7103	0	0	0	0	0
2.7213	0	0	0	0	0
2.7323	0	0	0	0	0
2.7433	0	0	0	0	0
2.7544	0	0	0	0	0
2.7654	0	0	0	0	0
2.7764	0	0	0	0	0
2.7874	0	0	0	0	0
2.7984	0	0	0	0	0
2.8095	0	0	0	0	0
2.8205	0	0	0	0	0
2.8315	0	0	0	0	0
2.8425	0	0	0	0	0
2.8535	0	0	0	0	0
2.8645	0	0	0	0	0
2.8756	0	0	0	0	0
2.8866	0	0	0	0	0
2.8976	0	0	0	0	0
2.9086	0	0	0	0	0
2.9196	0	0	0	0	0
2.9306	0	0	0	0	0
2.9417	0	0	0	0	0
2.9527	0	0	0	0	0
2.9637	0	0	0	0	0
2.9747	0	0	0	0	0
2.9857	0	0	0	0	0
2.9968	0	0	0	0	0
3.0078	0	0	0	0	0
3.0188	0	0	0	0	0
3.0298	0	0	0	0	0
3.0408	0	0	0	0	0
3.0518	0	0	0	0	0
3.0629	0	0	0	0	0
3.0739	0	0	0	0	0
3.0849	0	0	0	0	0
3.0959	0	0	0	0	0
3.1069	0	0	0	0	0
3.1179	0	0	0	0	0
3.129	0	0	0	0	0
3.14	0	0	0	0	0
3.151	0	0	0	0	0
3.162	0	0	0	0	0
3.173	0	0	0	0	0
3.184	0	0	0	0	0
3.1951	0	0	0	0	0
3.2061	0	0	0	0	0
3.2171	0	0	0	0	0
3.2281	0	0	0	0	0
3.2391	0	0	0	0	0
3.2502	0	0	0	0	0
3.2612	0	0	0	0	0
3.2722	0	0	0	0	0
3.2832	0	0	0	0	0
3.2942	0	0	0	0	0
3.3052	0	0	0	0	0
3.3163	0	0	0	0	0
3.3273	0	0	0	0	0
3.3383	0	0	0	0	0
3.3493	0	0	0	0	0
3.3603	0	0	0	0	0
3.3713	0	0	0	0	0
3.3824	0	0	0	0	0
3.3934	0	0	0	0	0
3.4044	0	0	0	0	0
3.4154	0	0	0	0	0
3.4264	0	0	0	0	0
3.4374	0	0	0	0	0
3.4485	0	0	0	0	0
3.4595	0	0	0	0	0
3.4705	0	0	0	0	0
3.4815	0	0	0	0	0
3.4925	0	0	0	0	0
3.5036	0	0	0	0	0
3.5146	0	0	0	0	0
3.5256	0	0	0	0	0
3.5366	0	0	0	0	0
3.5476	0	0	0	0	0
3.5586	0	0	0	0	0
3.5697	0	0	0	0	0
3.5807	0	0	0	0	0
3.5917	0	0	0	0	0
3.6027	0	0	0	0	0
3.6137	0	0	0	0	0
3.6247	0	0	0	0	0
3.6358	0	0	0	0	0
3.6468	0	0	0	0	0
3.6578	0	0	0	0	0
3.6688	0	0	0	0	0
3.6798	0	0	0	0	0
3.6909	0	0	0	0	0
3.7019	0	0	0	0	0
3.7129	0	0	0	0	0
3.7239	0	0	0	0	0
3.7349	0	0	0	0	0
3.7459	0	0	0	0	0
3.757	0	0	0	0	0
3.768	0	0	0	0	0
3.779	0	0	0	0	0
3.79	0	0	0	0	0
3.801	0	0	0	0	0
3.812	0	0	0	0	0
3.8231	0	0	0	0	0
3.8341	0	0	0	0	0
3.8451	0	0	0	0	0
3.8561	0	0	0	0	0
3.8671	0	0	0	0	0
3.8781	0	0	0	0	0
3.8892	0	0	0	0	0
3.9002	0	0	0	0	0
3.9112	0	0	0	0	0
3.9222	0	0	0	0	0
3.9332	0	0	0	0	0
3.9443	0	0	0	0	0
3.9553	0	0	0	0	0
3.9663	0	0	0	0	0
3.9773	0	0	0	0	0
3.9883	0	0	0	0	0
3.9993	0	0	0	0	0
4.0104	0	0	0	0	0
4.0214	0	0	0	0	0
4.0324	0	0	0	0	0
4.0434	0	0	0	0	0
4.0544	0	0	0	0	0
4.0654	0	0	0	0	0
4.0765	0	0	0	0	0
4.0875	0	0	0	0	0
4.0985	0	0	0	0	0
4.1095	0	0	0	0	0
4.1205	0	0	0	0	0
4.1316	0	0	0	0	0
4.1426	0	0	0	0	0
4.1536	0	0	0	0	0
4.1646	0	0	0	0	0
4.1756	0	0	0	0	0
4.1866	0	0	0	0	0
4.1977	0	0	0	0	0
4.2087	0	0	0	0	0
4.2197	0	0	0	0	0
4.2307	0	0	0	0	0
4.2417	0	0	0	0	0
4.2527	0	0	0	0	0
4.2638	0	0	0	0	0
4.2748	0	0	0	0	0
4.2858	0	0	0	0	0
4.2968	0	0	0	0	0
4.3078	0	0	0	0	0
4.3188	0	0	0	0	0
4.3299	0	0	0	0	0
4.3409	0	0	0	0	0
4.3519	0	0	0	0	0
4.3629	0	0	0	0	0
4.3739	0	0	0	0	0
4.385	0	0	0	0	0
4.396	0	0	0	0	0
4.407	0	0	0	0	0
4.418	0	0	0	0	0
4.429	0	0	0	0	0
4.44	0	0	0	0	0
4.4511	0	0	0	0	0
4.4621	0	0	0	0	0
4.4731	0	0	0	0	0
4.4841	0	0	0	0	0
4.4951	0	0	0	0	0
4.5061	0	0	0	0	0
4.5172	0	0	0	0	0
4.5282	0	0	0	0	0
4.5392	0	0	0	0	0
4.5502	0	0	0	0	0
4.5612	0	0	0	0	0
4.5722	0	0	0	0	0
4.5833	0	0	0	0	0
4.5943	0	0	0	0	0
4.6053	0	0	0	0	0
4.6163	0	0	0	0	0
4.6273	0	0	0	0	0
4.6384	0	0	0	0	0
4.6494	0	0	0	0	0
4.6604	0	0	0	0	0
4.6714	0	0	0	0	0
4.6824	0	0	0	0	0
4.6934	0	0	0	0	0
4.7045	0	0	0	0	0
4.7155	0	0	0	0	0
4.7265	0	0	0	0	0
4.7375	0	0	0	0	0
4.7485	0	0	0	0	0
4.7595	0	0	0	0	0
4.7706	0	0	0	0	0
4.7816	0	0	0	0	0
4.7926	0	0	0	0	0
4.8036	0	0	0	0	0
4.8146	0	0	0	0	0
4.8257	0	0	0	0	0
4.8367	0	0	0	0	0
4.8477	0	0	0	0	0
4.8587	0	0	0	0	0
4.8697	0	0	0	0	0
4.8807	0	0	0	0	0
4.8918	0	0	0	0	0
4.9028	0	0	0	0	0
4.9138	0	0	0	0	0
4.9248	0	0	0	0	0
4.9358	0	0	0	0	0
4.9468	0	0	0	0	0
4.9579	0	0	0	0	0
4.9689	0	0	0	0	0
4.9799	0	0	0	0	0
4.9909	0	0	0	0	0
5.0019	0	0	0	0	0
5.0129	0	0	0	0	0
5.024	0	0	0	0	0
5.035	0	0	0	0	0
5.046	0	0	0	0	0
5.057	0	0	0	0	0
5.068	0	0	0	0	0
5.0791	0	0	0	0	0
5.0901	0	0	0	0	0
5.1011	0	0	0	0	0
5.1121	0	0	0	0	0
5.1231	0	0	0	0	0
5.1341	0	0	0	0	0
5.1452	0	0	0	0	0
5.1562	0	0	0	0	0
5.1672	0	0	0	0	0
5.1782	0	0	0	0	0
5.1892	0	0	0	0	0
5.2002	0	0	0	0	0
5.2113	0	0	0	0	0
5.2223	0	0	0	0	0
5.2333	0	0	0	0	0
5.2443	0	0	0	0	0
5.2553	0	0	0	0	0
5.2663	0	0	0	0	0
5.2774	0	0	0	0	0
5.2884	0	0	0	0	0
5.2994	0	0	0	0	0
5.3104	0	0	0	0	0
5.3214	0	0	0	0	0
5.3325	0	0	0	0	0
5.3435	0	0	0	0	0
5.3545	0	0	0	0	0
5.3655	0	0	0	0	0
5.3765	0	0	0	0	0
5.3875	0	0	0	0	0
5.3986	0	0	0	0	0
5.4096	0	0	0	0	0
5.4206	0	0	0	0	0
5.4316	0	0	0	0	0
5.4426	0	0	0	0	0
5.4536	0	0	0	0	0
5.4647	0	0	0	0	0
5.4757	0	0	0	0	0
5.4867	0	0	0	0	0
5.4977	0	0	0	0	0
5.5087	0	0	0	0	0
5.5198	0	0	0	0	0
5.5308	0	0	0	0	0
5.5418	0	0	0	0	0
5.5528	0	0	0	0	0
5.5638	0	0	0	0	0
5.5748	0	0	0	0	0
5.5859	0	0	0	0	0
5.5969	0	0	0	0	0
5.6079	0	0	0	0	0
5.6189	0	0	0	0	0
5.6299	0	0	0	0	0
5.6409	0	0	0	0	0
5.652	0	0	0	0	0
5.663	0	0	0	0	0
5.674	0	0	0	0	0
5.685	0	0	0	0	0
5.696	0	0	0	0	0
5.707	0	0	0	0	0
5.7181	0	0	0	0	0
5.7291	0	0	0	0	0
5.7401	0	0	0	0	0
5.7511	0	0	0	0	0
5.7621	0	0	0	0	0
5.7732	0	0	0	0	0
5.7842	0	0	0	0	0
5.7952	0	0	0	0	0
5.8062	0	0	0	0	0
5.8172	0	0	0	0	0
5.8282	0	0	0	0	0
5.8393	0	0	0	0	0
5.8503	0	0	0	0	0
5.8613	0	0	0	0	0
5.8723	0	0	0	0	0
5.8833	0	0	0	0	0
5.8943	0	0	0	0	0
5.9054	0	0	0	0	0
5.9164	0	0	0	0	0
5.9274	0	0	0	0	0
5.9384	0	0	0	0	0
5.9494	0	0	0	0	0
5.9604	0	0	0	0	0
5.9715	0	0	0	0	0
5.9825	0	0	0	0	0
5.9935	0	0	0	0	0
6.0045	0	0	0	0	0
6.0155	0	0	0	0	0
6.0266	0	0	0	0	0
6.0376	0	0	0	0	0
6.0486	0	0	0	0	0
6.0596	0	0	0	0	0
6.0706	0	0	0	0	0
6.0816	0	0	0	0	0
6.0927	0	0	0	0	0
6.1037	0	0	0	0	0
6.1147	0	0	0	0	0
6.1257	0	0	0	0	0
6.1367	0	0	0	0	0
6.1477	0	0	0	0	0
6.1588	0	0	0	0	0
6.1698	0	0	0	0	0
6.1808	0	0	0	0	0
6.1918	0	0	0	0	0
6.2028	0	0	0	0	0
6.2139	0	0	0	0	0
6.2249	0	0	0	0	0
6.2359	0	0	0	0	0
6.2469	0	0	0	0	0
6.2579	0	0	0	0	0
6.2689	0	0	0	0	0
6.28	0	0	0	0	0
6.291	0	0	0	0	0
6.302	0	0	0	0	0
6.313	0	0	0	0	0
6.324	0	0	0	0	0
6.335	0	0	0	0	0
6.3461	0	0	0	0	0
6.3571	0	0	0	0	0
6.3681	0	0	0	0	0
6.3791	0	0	0	0	0
6.3901	0	0	0	0	0
6.4011	0	0	0	0	0
6.4122	0	0	0	0	0
6.4232	0	0	0	0	0
6.4342	0	0	0	0	0
6.4452	0	0	0	0	0
6.4562	0	0	0	0	0
6.4673	0	0	0	0	0
6.4783	0	0	0	0	0
6.4893	0	0	0	0	0
6.5003	0	0	0	0	0
6.5113	0	0	0	0	0
6.5223	0	0	0	0	0
6.5334	0	0	0	0	0
6.5444	0	0	0	0	0
6.5554	0	0	0	0	0
6.5664	0	0	0	0	0
6.5774	0	0	0	0	0
6.5884	0	0	0	0	0
6.5995	0	0	0	0	0
6.6105	0	0	0	0	0
6.6215	0	0	0	0	0
6.6325	0	0	0	0	0
6.6435	0	0	0	0	0
6.6546	0	0	0	0	0
6.6656	0	0	0	0	0
6.6766	0	0	0	0	0
6.6876	0	0	0	0	0
6.6986	0	0	0	0	0
6.7096	0	0	0	0	0
6.7207	0	0	0	0	0
6.7317	0	0	0	0	0
6.7427	0	0	0	0	0
6.7537	0	0	0	0	0
6.7647	0	0	0	0	0
6.7757	0	0	0	0	0
6.7868	0	0	0	0	0
6.7978	0	0	0	0	0
6.8088	0	0	0	0	0
6.8198	0	0	0	0	0
6.8308	0	0	0	0	0
6.8418	0	0	0	0	0
6.8529	0	0	0	0	0
6.8639	0	0	0	0	0
6.8749	0	0	0	0	0
6.8859	0	0	0	0	0
6.8969	0	0	0	0	0
6.908	0	0	0	0	0
6.919	0	0	0	0	0
6.93	0	0	0	0	0
6.941	0	0	0	0	0
6.952	0	0	0	0	0
6.963	0	0	0	0	0
6.9741	0	0	0	0	0
6.9851	0	0	0	0	0
6.9961	0	0	0	0	0
7.0071	0	0	0	0	0
7.0181	0	0	0	0	0
7.0291	0	0	0	0	0
7.0402	0	0	0	0	0
7.0512	0	0	0	0	0
7.0622	0	0	0	0	0
7.0732	0	0	0	0	0
7.0842	0	0	0	0	0
7.0952	0	0	0	0	0
7.1063	0	0	0	0	0
7.1173	0	0	0	0	0
7.1283	0	0	0	0	0
7.1393	0	0	0	0	0
7.1503	0	0	0	0	0
7.1614	0	0	0	0	0
7.1724	0	0	0	0	0
7.1834	0	0	0	0	0
7.1944	0	0	0	0	0
7.2054	0	0	0	0	0
7.2164	0	0	0	0	0
7.2275	0	0	0	0	0
7.2385	0	0	0	0	0
7.2495	0	0	0	0	0
7.2605	0	0	0	0	0
7.2715	0	0	0	0	0
7.2825	0	0	0	0	0
7.2936	0	0	0	0	0
7.3046	0	0	0	0	0
7.3156	0	0	0	0	0
7.3266	0	0	0	0	0
7.3376	0	0	0	0	0
7.3487	0	0	0	0	0
7.3597	0	0	0	0	0
7.3707	0	0	0	0	0
7.3817	0	0	0	0	0
7.3927	0	0	0	0	0
7.4037	0	0	0	0	0
7.4148	0	0	0	0	0
7.4258	0	0	0	0	0
7.4368	0	0	0	0	0
7.4478	0	0	0	0	0
7.4588	0	0	0	0	0
7.4698	0	0	0	0	0
7.4809	0	0	0	0	0
7.4919	0	0	0	0	0
7.5029	0	0	0	0	0
7.5139	0	0	0	0	0
7.5249	0	0	0	0	0
7.5359	0	0	0	0	0
7.547	0	0	0	0	0
7.558	0	0	0	0	0
7.569	0	0	0	0	0
7.58	0	0	0	0	0
7.591	0	0	0	0	0
7.6021	0	0	0	0	0
7.6131	0	0	0	0	0
7.6241	0	0	0	0	0
7.6351	0	0	0	0	0
7.6461	0	0	0	0	0
7.6571	0	0	0	0	0
7.6682	0	0	0	0	0
7.6792	0	0	0	0	0
7.6902	0	0	0	0	0
7.7012	0	0	0	0	0
7.7122	0	0	0	0	0
7.7232	0	0	0	0	0
7.7343	0	0	0	0	0
7.7453	0	0	0	0	0
7.7563	0	0	0	0	0
7.7673	0	0	0	0	0
7.7783	0	0	0	0	0
7.7893	0	0	0	0	0
7.8004	0	0	0	0	0
7.8114	0	0	0	0	0
7.8224	0	0	0	0	0
7.8334	0	0	0	0	0
7.8444	0	0	0	0	0
7.8555	0	0	0	0	0
7.8665	0	0	0	0	0
7.8775	0	0	0	0	0
7.8885	0	0	0	0	0
7.8995	0	0	0	0	0
7.9105	0	0	0	0	0
7.9216	0	0	0	0	0
7.9326	0	0	0	0	0
7.9436	0	0	0	0	0
7.9546	0	0	0	0	0
7.9656	0	0	0	0	0
7.9766	0	0	0	0	0
7.9877	0	0	0	0	0
7.9987	0	0	0	0	0
8.0097	0	0	0	0	0
8.0207	0	0	0	0	0
8.0317	0	0	0	0	0
8.0428	0	0	0	0	0
8.0538	0	0	0	0	0
8.0648	0	0	0	0	0
8.0758	0	0	0	0	0
8.0868	0	0	0	0	0
8.0978	0	0	0	0	0
8.1089	0	0	0	0	0
8.1199	0	0	0	0	0
8.1309	0	0	0	0	0
8.1419	0	0	0	0	0
8.1529	0	0	0	0	0
8.1639	0	0	0	0	0
8.175	0	0	0	0	0
8.186	0	0	0	0	0
8.197	0	0	0	0	0
8.208	0	0	0	0	0
8.219	0	0	0	0	0
8.23	0	0	0	0	0
8.2411	0	0	0	0	0
8.2521	0	0	0	0	0
8.2631	0	0	0	0	0
8.2741	0	0	0	0	0
8.2851	0	0	0	0	0
8.2962	0	0	0	0	0
8.3072	0	0	0	0	0
8.3182	0	0	0	0	0
8.3292	0	0	0	0	0
8.3402	0	0	0	0	0
8.3512	0	0	0	0	0
8.3623	0	0	0	0	0
8.3733	0	0	0	0	0
8.3843	0	0	0	0	0
8.3953	0	0	0	0	0
8.4063	0	0	0	0	0
8.4173	0	0	0	0	0
8.4284	0	0	0	0	0
8.4394	0	0	0	0	0
8.4504	0	0	0	0	0
8.4614	0	0	0	0	0
8.4724	0	0	0	0	0
8.4834	0	0	0	0	0
8.4945	0	0	0	0	0
8.5055	0	0	0	0	0
8.5165	0	0	0	0	0
8.5275	0	0	0	0	0
8.5385	0	0	0	0	0
8.5496	0	0	0	0	0
8.5606	0	0	0	0	0
8.5716	0	0	0	0	0
8.5826	0	0	0	0	0
8.5936	0	0	0	0	0
8.6046	0	0	0	0	0
8.6157	0	0	0	0	0
8.6267	0	0	0	0	0
8.6377	0	0	0	0	0
8.6487	0	0	0	0	0
8.6597	0	0	0	0	0
8.6707	0	0	0	0	0
8.6818	0	0	0	0	0
8.6928	0	0	0	0	0
8.7038	0	0	0	0	0
8.7148	0	0	0	0	0
8.7258	0	0	0	0	0
8.7369	0	0	0	0	0
8.7479	0	0	0	0	0
8.7589	0	0	0	0	0
8.7699	0	0	0	0	0
8.7809	0	0	0	0	0
8.7919	0	0	0	0	0
8.803	0	0	0	0	0
8.814	0	0	0	0	0
8.825	0	0	0	0	0
8.836	0	0	0	0	0
8.847	0	0	0	0	0
8.858	0	0	0	0	0
8.8691	0	0	0	0	0
8.8801	0	0	0	0	0
8.8911	0	0	0	0	0
8.9021	0	0	0	0	0
8.9131	0	0	0	0	0
8.9241	0	0	0	0	0
8.9352	0	0	0	0	0
8.9462	0	0	0	0	0
8.9572	0	0	0	0	0
8.9682	0	0	0	0	0
8.9792	0	0	0	0	0
8.9903	0	0	0	0	0
9.0013	0	0	0	0	0
9.0123	0	0	0	0	0
9.0233	0	0	0	0	0
9.0343	0	0	0	0	0
9.0453	0	0	0	0	0
9.0564	0	0	0	0	0
9.0674	0	0	0	0	0
9.0784	0	0	0	0	0
9.0894	0	0	0	0	0
9.1004	0	0	0	0	0
9.1114	0	0	0	0	0
9.1225	0	0	0	0	0
9.1335	0	0	0	0	0
9.1445	0	0	0	0	0
9.1555	0	0	0	0	0
9.1665	0	0	0	0	0
9.1776	0	0	0	0	0
9.1886	0	0	0	0	0
9.1996	0	0	0	0	0
9.2106	0	0	0	0	0
9.2216	0	0	0	0	0
9.2326	0	0	0	0	0
9.2437	0	0	0	0	0
9.2547	0	0	0	0	0
9.2657	0	0	0	0	0
9.2767	0	0	0	0	0
9.2877	0	0	0	0	0
9.2987	0	0	0	0	0
9.3098	0	0	0	0	0
9.3208	0	0	0	0	0
9.3318	0	0	0	0	0
9.3428	0	0	0	0	0
9.3538	0	0	0	0	0
9.3648	0	0	0	0	0
9.3759	0	0	0	0	0
9.3869	0	0	0	0	0
9.3979	0	0	0	0	0
9.4089	0	0	0	0	0
9.4199	0	0	0	0	0
9.431	0	0	0	0	0
9.442	0	0	0	0	0
9.453	0	0	0	0	0
9.464	0	0	0	0	0
9.475	0	0	0	0	0
9.486	0	0	0	0	0
9.4971	0	0	0	0	0
9.5081	0	0	0	0	0
9.5191	0	0	0	0	0
9.5301	0	0	0	0	0
9.5411	0	0	0	0	0
9.5521	0	0	0	0	0
9.5632	0	0	0	0	0
9.5742	0	0	0	0	0
9.5852	0	0	0	0	0
9.5962	0	0	0	0	0
9.6072	0	0	0	0	0
9.6182	0	0	0	0	0
9.6293	0	0	0	0	0
9.6403	0	0	0	0	0
9.6513	0	0	0	0	0
9.6623	0	0	0	0	0
9.6733	0	0	0	0	0
9.6844	0	0	0	0	0
9.6954	0	0	0	0	0
9.7064	0	0	0	0	0
9.7174	0	0	0	0	0
9.7284	0	0	0	0	0
9.7394	0	0	0	0	0
9.7505	0	0	0	0	0
9.7615	0	0	0	0	0
9.7725	0	0	0	0	0
9.7835	0	0	0	0	0
9.7945	0	0	0	0	0
9.8055	0	0	0	0	0
9.8166	0	0	0	0	0
9.8276	0	0	0	0	0
9.8386	0	0	0	0	0
9.8496	0	0	0	0	0
9.8606	0	0	0	0	0
9.8717	0	0	0	0	0
9.8827	0	0	0	0	0
9.8937	0	0	0	0	0
9.9047	0	0	0	0	0
9.9157	0	0	0	0	0
9.9267	0	0	0	0	0
9.9378	0	0	0	0	0
9.9488	0	0	0	0	0
9.9598	0	0	0	0	0
9.9708	0	0	0	0	0
9.9818	0	0	0	0	0
9.9928	0	0	0	0	0
10.0039	0	0	0	0	0
10.0149	0	0	0	0	0
10.0259	0	0	0	0	0
10.0369	0	0	0	0	0
10.0479	0	0	0	0	0
10.0589	0	0	0	0	0
10.07	0	0	0	0	0
10.081	0	0	0	0	0
10.092	0	0	0	0	0
10.103	0	0	0	0	0
10.114	0	0	0	0	0
10.1251	0	0	0	0	0
10.1361	0	0	0	0	0
10.1471	0	0	0	0	0
10.1581	0	0	0	0	0
10.1691	0	0	0	0	0
10.1801	0	0	0	0	0
10.1912	0	0	0	0	0
10.2022	0	0	0	0	0
10.2132	0	0	0	0	0
10.2242	0	0	0	0	0
10.2352	0	0	0	0	0
10.2462	0	0	0	0	0
10.2573	0	0	0	0	0
10.2683	0	0	0	0	0
10.2793	0	0	0	0	0
10.2903	0	0	0	0	0
10.3013	0	0	0	0	0
10.3123	0	0	0	0	0
10.3234	0	0	0	0	0
10.3344	0	0	0	0	0
10.3454	0	0	0	0	0
10.3564	0	0	0	0	0
10.3674	0	0	0	0	0
10.3785	0	0	0	0	0
10.3895	0	0	0	0	0
10.4005	0	0	0	0	0
10.4115	0	0	0	0	0
10.4225	0	0	0	0	0
10.4335	0	0	0	0	0
10.4446	0	0	0	0	0
10.4556	0	0	0	0	0
10.4666	0	0	0	0	0
10.4776	0	0	0	0	0
10.4886	0	0	0	0	0
10.4996	0	0	0	0	0
10.5107	0	0	0	0	0
10.5217	0	0	0	0	0
10.5327	0	0	0	0	0
10.5437	0	0	0	0	0
10.5547	0	0	0	0	0
10.5658	0	0	0	0	0
10.5768	0	0	0	0	0
10.5878	0	0	0	0	0
10.5988	0	0	0	0	0
10.6098	0	0	0	0	0
10.6208	0	0	0	0	0
10.6319	0	0	0	0	0
10.6429	0	0	0	0	0
10.6539	0	0	0	0	0
10.6649	0	0	0	0	0
10.6759	0	0	0	0	0
10.6869	0	0	0	0	0
10.698	0	0	0	0	0
10.709	0	0	0	0	0
10.72	0	0	0	0	0
10.731	0	0	0	0	0
10.742	0	0	0	0	0
10.753	0	0	0	0	0
10.7641	0	0	0	0	0
10.7751	0	0	0	0	0
10.7861	0	0	0	0	0
10.7971	0	0	0	0	0
10.8081	0	0	0	0	0
10.8192	0	0	0	0	0
10.8302	0	0	0	0	0
10.8412	0	0	0	0	0
10.8522	0	0	0	0	0
10.8632	0	0	0	0	0
10.8742	0	0	0	0	0
10.8853	0	0	0	0	0
10.8963	0	0	0	0	0
10.9073	0	0	0	0	0
10.9183	0	0	0	0	0
10.9293	0	0	0	0	0
10.9403	0	0	0	0	0
10.9514	0	0	0	0	0
10.9624	0	0	0	0	0
10.9734	0	0	0	0	0
10.9844	0	0	0	0	0
10.9954	0	0	0	0	0
11.0064	0	0	0	0	0
11.0175	0	0	0	0	0
11.0285	0	0	0	0	0
11.0395	0	0	0	0	0
11.0505	0	0	0	0	0
11.0615	0	0	0	0	0
11.0726	0	0	0	0	0
11.0836	0	0	0	0	0
11.0946	0	0	0	0	0
11.1056	0	0	0	0	0
11.1166	0	0	0	0	0
11.1276	0	0	0	0	0
11.1387	0	0	0	0	0
11.1497	0	0	0	0	0
11.1607	0	0	0	0	0
11.1717	0	0	0	0	0
11.1827	0	0	0	0	0
11.1937	0	0	0	0	0
11.2048	0	0	0	0	0
11.2158	0	0	0	0	0
11.2268	0	0	0	0	0
11.2378	0	0	0	0	0
11.2488	0	0	0	0	0
11.2599	0	0	0	0	0
11.2709	0	0	0	0	0
11.2819	0	0	0	0	0
11.2929	0	0	0	0	0
11.3039	0	0	0	0	0
11.3149	0	0	0	0	0
11.326	0	0	0	0	0
11.337	0	0	0	0	0
11.348	0	0	0	0	0
11.359	0	0	0	0	0
11.37	0	0	0	0	0
11.381	0	0	0	0	0
11.3921	0	0	0	0	0
11.4031	0	0	0	0	0
11.4141	0	0	0	0	0
11.4251	0	0	0	0	0
11.4361	0	0	0	0	0
11.4471	0	0	0	0	0
11.4582	0	0	0	0	0
11.4692	0	0	0	0	0
11.4802	0	0	0	0	0
11.4912	0	0	0	0	0
11.5022	0	0	0	0	0
11.5133	0	0	0	0	0
11.5243	0	0	0	0	0
11.5353	0	0	0	0	0
11.5463	0	0	0	0	0
11.5573	0	0	0	0	0
11.5683	0	0	0	0	0
11.5794	0	0	0	0	0
11.5904	0	0	0	0	0
11.6014	0	0	0	0	0
11.6124	0	0	0	0	0
11.6234	0	0	0	0	0
11.6344	0	0	0	0	0
11.6455	0	0	0	0	0
11.6565	0	0	0	0	0
11.6675	0	0	0	0	0
11.6785	0	0	0	0	0
11.6895	0	0	0	0	0
11.7006	0	0	0	0	0
11.7116	0	0	0	0	0
11.7226	0	0	0	0	0
11.7336	0	0	0	0	0
11.7446	0	0	0	0	0
11.7556	0	0	0	0	0
11.7667	0	0	0	0	0
11.7777	0	0	0	0	0
11.7887	0	0	0	0	0
11.7997	0	0	0	0	0
11.8107	0	0	0	0	0
11.8217	0	0	0	0	0
11.8328	0	0	0	0	0
11.8438	0	0	0	0	0
11.8548	0	0	0	0	0
11.8658	0	0	0	0	0
11.8768	0	0	0	0	0
11.8878	0	0	0	0	0
11.8989	0	0	0	0	0
11.9099	0	0	0	0	0
11.9209	0	0	0	0	0
11.9319	0	0	0	0	0
11.9429	0	0	0	0	0
11.954	0	0	0	0	0
11.965	0	0	0	0	0
11.976	0	0	0	0	0
11.987	0	0	0	0	0
11.998	0	0	0	0	0
12.009	0	0	0	0	0
12.0201	0	0	0	0	0
12.0311	0	0	0	0	0
12.0421	0	0	0	0	0
12.0531	0	0	0	0	0
12.0641	0	0	0	0	0
12.0751	0	0	0	0	0
12.0862	0	0	0	0	0
12.0972	0	0	0	0	0
12.1082	0	0	0	0	0
12.1192	0	0	0	0	0
12.1302	0	0	0	0	0
12.1412	0	0	0	0	0
12.1523	0	0	0	0	0
12.1633	0	0	0	0	0
12.1743	0	0	0	0	0
12.1853	0	0	0	0	0
12.1963	0	0	0	0	0
12.2074	0	0	0	0	0
12.2184	0	0	0	0	0
12.2294	0	0	0	0	0
12.2404	0	0	0	0	0
12.2514	0	0	0	0	0
12.2624	0	0	0	0	0
12.2735	0	0	0	0	0
12.2845	0	0	0	0	0
12.2955	0	0	0	0	0
12.3065	0	0	0	0	0
12.3175	0	0	0	0	0
12.3285	0	0	0	0	0
12.3396	0	0	0	0	0
12.3506	0	0	0	0	0
12.3616	0	0	0	0	0
12.3726	0	0	0	0	0
12.3836	0	0	0	0	0
12.3947	0	0	0	0	0
12.4057	0	0	0	0	0
12.4167	0	0	0	0	0
12.4277	0	0	0	0	0
12.4387	0	0	0	0	0
12.4497	0	0	0	0	0
12.4608	0	0	0	0	0
12.4718	0	0	0	0	0
12.4828	0	0	0	0	0
12.4938	0	0	0	0	0
12.5048	0	0	0	0	0
12.5158	0	0	0	0	0
12.5269	0	0	0	0	0
12.5379	0	0	0	0	0
12.5489	0	0	0	0	0
12.5599	0	0	0	0	0
12.5709	0	0	0	0	0
12.5819	0	0	0	0	0
12.593	0	0	0	0	0
12.604	0	0	0	0	0
12.615	0	0	0	0	0
12.626	0	0	0	0	0
12.637	0	0	0	0	0
12.6481	0	0	0	0	0
12.6591	0	0	0	0	0
12.6701	0	0	0	0	0
12.6811	0	0	0	0	0
12.6921	0	0	0	0	0
12.7031	0	0	0	0	0
12.7142	0	0	0	0	0
12.7252	0	0	0	0	0
12.7362	0	0	0	0	0
12.7472	0	0	0	0	0
12.7582	0	0	0	0	0
12.7692	0	0	0	0	0
12.7803	0	0	0	0	0
12.7913	0	0	0	0	0
12.8023	0	0	0	0	0
12.8133	0	0	0	0	0
12.8243	0	0	0	0	0
12.8353	0	0	0	0	0
12.8464	0	0	0	0	0
12.8574	0	0	0	0	0
12.8684	0	0	0	0	0
12.8794	0	0	0	0	0
12.8904	0	0	0	0	0
12.9015	0	0	0	0	0
12.9125	0	0	0	0	0
12.9235	0	0	0	0	0
12.9345	0	0	0	0	0
12.9455	0	0	0	0	0
12.9565	0	0	0	0	0
12.9676	0	0	0	0	0
12.9786	0	0	0	0	0
12.9896	0	0	0	0	0
13.0006	0	0	0	0	0
13.0116	0	0	0	0	0
13.0226	0	0	0	0	0
13.0337	0	0	0	0	0
13.0447	0	0	0	0	0
13.0557	0	0	0	0	0
13.0667	0	0	0	0	0
13.0777	0	0	0	0	0
13.0888	0	0	0	0	0
13.0998	0	0	0	0	0
13.1108	0	0	0	0	0
13.1218	0	0	0	0	0
13.1328	0	0	0	0	0
13.1438	0	0	0	0	0
13.1549	0	0	0	0	0
13.1659	0	0	0	0	0
13.1769	0	0	0	0	0
13.1879	0	0	0	0	0
13.1989	0	0	0	0	0
13.2099	0	0	0	0	0
13.221	0	0	0	0	0
13.232	0	0	0	0	0
13.243	0	0	0	0	0
13.254	0	0	0	0	0
13.265	0	0	0	0	0
13.276	0	0	0	0	0
13.2871	0	0	0	0	0
13.2981	0	0	0	0	0
13.3091	0	0	0	0	0
13.3201	0	0	0	0	0
13.3311	0	0	0	0	0
13.3422	0	0	0	0	0
13.3532	0	0	0	0	0
13.3642	0	0	0	0	0
13.3752	0	0	0	0	0
13.3862	0	0	0	0	0
13.3972	0	0	0	0	0
13.4083	0	0	0	0	0
13.4193	0	0	0	0	0
13.4303	0	0	0	0	0
13.4413	0	0	0	0	0
13.4523	0	0	0	0	0
13.4633	0	0	0	0	0
13.4744	0	0	0	0	0
13.4854	0	0	0	0	0
13.4964	0	0	0	0	0
13.5074	0	0	0	0	0
13.5184	0	0	0	0	0
13.5294	0	0	0	0	0
13.5405	0	0	0	0	0
13.5515	0	0	0	0	0
13.5625	0	0	0	0	0
13.5735	0	0	0	0	0
13.5845	0	0	0	0	0
13.5956	0	0	0	0	0
13.6066	0	0	0	0	0
13.6176	0	0	0	0	0
13.6286	0	0	0	0	0
13.6396	0	0	0	0	0
13.6506	0	0	0	0	0
13.6617	0	0	0	0	0
13.6727	0	0	0	0	0
13.6837	0	0	0	0	0
13.6947	0	0	0	0	0
13.7057	0	0	0	0	0
13.7167	0	0	0	0	0
13.7278	0	0	0	0	0
13.7388	0	0	0	0	0
13.7498	0	0	0	0	0
13.7608	0	0	0	0	0
13.7718	0	0	0	0	0
13.7829	0	0	0	0	0
13.7939	0	0	0	0	0
13.8049	0	0	0	0	0
13.8159	0	0	0	0	0
13.8269	0	0	0	0	0
13.8379	0	0	0	0	0
13.849	0	0	0	0	0
13.86	0	0	0	0	0
13.871	0	0	0	0	0
13.882	0	0	0	0	0
13.893	0	0	0	0	0
13.904	0	0	0	0	0
13.9151	0	0	0	0	0
13.9261	0	0	0	0	0
13.9371	0	0	0	0	0
13.9481	0	0	0	0	0
13.9591	0	0	0	0	0
13.9701	0	0	0	0	0
13.9812	0	0	0	0	0
13.9922	0	0	0	0	0
14.0032	0	0	0	0	0
14.0142	0	0	0	0	0
14.0252	0	0	0	0	0
14.0363	0	0	0	0	0
14.0473	0	0	0	0	0
14.0583	0	0	0	0	0
14.0693	0	0	0	0	0
14.0803	0	0	0	0	0
14.0913	0	0	0	0	0
14.1024	0	0	0	0	0
14.1134	0	0	0	0	0
14.1244	0	0	0	0	0
14.1354	0	0	0	0	0
14.1464	0	0	0	0	0
14.1574	0	0	0	0	0
14.1685	0	0	0	0	0
14.1795	0	0	0	0	0
14.1905	0	0	0	0	0
14.2015	0	0	0	0	0
14.2125	0	0	0	0	0
14.2236	0	0	0	0	0
14.2346	0	0	0	0	0
14.2456	0	0	0	0	0
14.2566	0	0	0	0	0
14.2676	0	0	0	0	0
14.2786	0	0	0	0	0
14.2897	0	0	0	0	0
14.3007	0	0	0	0	0
14.3117	0	0	0	0	0
14.3227	0	0	0	0	0
14.3337	0	0	0	0	0
14.3447	0	0	0	0	0
14.3558	0	0	0	0	0
14.3668	0	0	0	0	0
14.3778	0	0	0	0	0
14.3888	0	0	0	0	0
14.3998	0	0	0	0	0
14.4108	0	0	0	0	0
14.4219	0	0	0	0	0
14.4329	0	0	0	0	0
14.4439	0	0	0	0	0
14.4549	0	0	0	0	0
14.4659	0	0	0	0	0
14.477	0	0	0	0	0
14.488	0	0	0	0	0
14.499	0	0	0	0	0
14.51	0	0	0	0	0
14.521	0	0	0	0	0
14.532	0	0	0	0	0
14.5431	0	0	0	0	0
14.5541	0	0	0	0	0
14.5651	0	0	0	0	0
14.5761	0	0	0	0	0
14.5871	0	0	0	0	0
14.5981	0	0	0	0	0
14.6092	0	0	0	0	0
14.6202	0	0	0	0	0
14.6312	0	0	0	0	0
14.6422	0	0	0	0	0
14.6532	0	0	0	0	0
14.6642	0	0	0	0	0
14.6753	0	0	0	0	0
14.6863	0	0	0	0	0
14.6973	0	0	0	0	0
14.7083	0	0	0	0	0
14.7193	0	0	0	0	0
14.7304	0	0	0	0	0
14.7414	0	0	0	0	0
14.7524	0	0	0	0	0
14.7634	0	0	0	0	0
14.7744	0	0	0	0	0
14.7854	0	0	0	0	0
14.7965	0	0	0	0	0
14.8075	0	0	0	0	0
14.8185	0	0	0	0	0
14.8295	0	0	0	0	0
14.8405	0	0	0	0	0
14.8515	0	0	0	0	0
14.8626	0	0	0	0	0
14.8736	0	0	0	0	0
14.8846	0	0	0	0	0
14.8956	0	0	0	0	0
14.9066	0	0	0	0	0
14.9177	0	0	0	0	0
14.9287	0	0	0	0	0
14.9397	0	0	0	0	0
14.9507	0	0	0	0	0
14.9617	0	0	0	0	0
14.9727	0	0	0	0	0
14.9838	0	0	0	0	0
14.9948	0	0	0	0	0
15.0058	0	0	0	0	0
15.0168	0	0	0	0	0
15.0278	0	0	0	0	0
15.0388	0	0	0	0	0
15.0499	0	0	0	0	0
15.0609	0	0	0	0	0
15.0719	0	0	0	0	0
15.0829	0	0	0	0	0
15.0939	0	0	0	0	0
15.1049	0	0	0	0	0
15.116	0	0	0	0	0
15.127	0	0	0	0	0
15.138	0	0	0	0	0
15.149	0	0	0	0	0
15.16	0	0	0	0	0
15.1711	0	0	0	0	0
15.1821	0	0	0	0	0
15.1931	0	0	0	0	0
15.2041	0	0	0	0	0
15.2151	0	0	0	0	0
15.2261	0	0	0	0	0
15.2372	0	0	0	0	0
15.2482	0	0	0	0	0
15.2592	0	0	0	0	0
15.2702	0	0	0	0	0
15.2812	0	0	0	0	0
15.2922	0	0	0	0	0
15.3033	0	0	0	0	0
15.3143	0	0	0	0	0
15.3253	0	0	0	0	0
15.3363	0	0	0	0	0
15.3473	0	0	0	0	0
15.3583	0	0	0	0	0
15.3694	0	0	0	0	0
15.3804	0	0	0	0	0
15.3914	0	0	0	0	0
15.4024	0	0	0	0	0
15.4134	0	0	0	0	0
15.4245	0	0	0	0	0
15.4355	0	0	0	0	0
15.4465	0	0	0	0	0
15.4575	0	0	0	0	0
15.4685	0	0	0	0	0
15.4795	0	0	0	0	0
15.4906	0	0	0	0	0
15.5016	0	0	0	0	0
15.5126	0	0	0	0	0
15.5236	0	0	0	0	0
15.5346	0	0	0	0	0
15.5456	0	0	0	0	0
15.5567	0	0	0	0	0
15.5677	0	0	0	0	0
15.5787	0	0	0	0	0
15.5897	0	0	0	0	0
15.6007	0	0	0	0	0
15.6118	0	0	0	0	0
15.6228	0	0	0	0	0
15.6338	0	0	0	0	0
15.6448	0	0	0	0	0
15.6558	0	0	0	0	0
15.6668	0	0	0	0	0
15.6779	0	0	0	0	0
15.6889	0	0	0	0	0
15.6999	0	0	0	0	0
15.7109	0	0	0	0	0
15.7219	0	0	0	0	0
15.7329	0	0	0	0	0
15.744	0	0	0	0	0
15.755	0	0	0	0	0
15.766	0	0	0	0	0
15.777	0	0	0	0	0
15.788	0	0	0	0	0
15.799	0	0	0	0	0
15.8101	0	0	0	0	0
15.8211	0	0	0	0	0
15.8321	0	0	0	0	0
15.8431	0	0	0	0	0
15.8541	0	0	0	0	0
15.8652	0	0	0	0	0
15.8762	0	0	0	0	0
15.8872	0	0	0	0	0
15.8982	0	0	0	0	0
15.9092	0	0	0	0	0
15.9202	0	0	0	0	0
15.9313	0	0	0	0	0
15.9423	0	0	0	0	0
15.9533	0	0	0	0	0
15.9643	0	0	0	0	0
15.9753	0	0	0	0	0
15.9863	0	0	0	0	0
15.9974	0	0	0	0	0
16.0084	0	0	0	0	0
16.0194	0	0	0	0	0
16.0304	0	0	0	0	0
16.0414	0	0	0	0	0
16.0524	0	0	0	0	0
16.0635	0	0	0	0	0
16.0745	0	0	0	0	0
16.0855	0	0	0	0	0
16.0965	0	0	0	0	0
16.1075	0	0	0	0	0
16.1186	0	0	0	0	0
16.1296	0	0	0	0	0
16.1406	0	0	0	0	0
16.1516	0	0	0	0	0
16.1626	0	0	0	0	0
16.1736	0	0	0	0	0
16.1847	0	0	0	0	0
16.1957	0	0	0	0	0
16.2067	0	0	0	0	0
16.2177	0	0	0	0	0
16.2287	0	0	0	0	0
16.2397	0	0	0	0	0
16.2508	0	0	0	0	0
16.2618	0	0	0	0	0
16.2728	0	0	0	0	0
16.2838	0	0	0	0	0
16.2948	0	0	0	0	0
16.3059	0	0	0	0	0
16.3169	0	0	0	0	0
16.3279	0	0	0	0	0
16.3389	0	0	0	0	0
16.3499	0	0	0	0	0
16.3609	0	0	0	0	0
16.372	0	0	0	0	0
16.383	0	0	0	0	0
16.394	0	0	0	0	0
16.405	0	0	0	0	0
16.416	0	0	0	0	0
16.427	0	0	0	0	0
16.4381	0	0	0	0	0
16.4491	0	0	0	0	0
16.4601	0	0	0	0	0
16.4711	0	0	0	0	0
16.4821	0	0	0	0	0
16.4931	0	0	0	0	0
16.5042	0	0	0	0	0
16.5152	0	0	0	0	0
16.5262	0	0	0	0	0
16.5372	0	0	0	0	0
16.5482	0	0	0	0	0
16.5593	0	0	0	0	0
16.5703	0	0	0	0	0
16.5813	0	0	0	0	0
16.5923	0	0	0	0	0
16.6033	0	0	0	0	0
16.6143	0	0	0	0	0
16.6254	0	0	0	0	0
16.6364	0	0	0	0	0
16.6474	0	0	0	0	0
16.6584	0	0	0	0	0
16.6694	0	0	0	0	0
16.6804	0	0	0	0	0
16.6915	0	0	0	0	0
16.7025	0	0	0	0	0
16.7135	0	0	0	0	0
16.7245	0	0	0	0	0
16.7355	0	0	0	0	0
16.7466	0	0	0	0	0
16.7576	0	0	0	0	0
16.7686	0	0	0	0	0
16.7796	0	0	0	0	0
16.7906	0	0	0	0	0
16.8016	0	0	0	0	0
16.8127	0	0	0	0	0
16.8237	0	0	0	0	0
16.8347	0	0	0	0	0
16.8457	0	0	0	0	0
16.8567	0	0	0	0	0
16.8677	0	0	0	0	0
16.8788	0	0	0	0	0
16.8898	0	0	0	0	0
16.9008	0	0	0	0	0
16.9118	0	0	0	0	0
16.9228	0	0	0	0	0
16.9338	0	0	0	0	0
16.9449	0	0	0	0	0
16.9559	0	0	0	0	0
16.9669	0	0	0	0	0
16.9779	0	0	0	0	0
16.9889	0	0	0	0	0
17	0	0	0	0	0
17.011	0	0	0	0	0
17.022	0	0	0	0	0
17.033	0	0	0	0	0
17.044	0	0	0	0	0
17.055	0	0	0	0	0
17.0661	0	0	0	0	0
17.0771	0	0	0	0	0
17.0881	0	0	0	0	0
17.0991	0	0	0	0	0
17.1101	0	0	0	0	0
17.1211	0	0	0	0	0
17.1322	0	0	0	0	0
17.1432	0	0	0	0	0
17.1542	0	0	0	0	0
17.1652	0	0	0	0	0
17.1762	0	0	0	0	0
17.1872	0	0	0	0	0
17.1983	0	0	0	0	0
17.2093	0	0	0	0	0
17.2203	0	0	0	0	0
17.2313	0	0	0	0	0
17.2423	0	0	0	0	0
17.2534	0	0	0	0	0
17.2644	0	0	0	0	0
17.2754	0	0	0	0	0
17.2864	0	0	0	0	0
17.2974	0	0	0	0	0
17.3084	0	0	0	0	0
17.3195	0	0	0	0	0
17.3305	0	0	0	0	0
17.3415	0	0	0	0	0
17.3525	0	0	0	0	0
17.3635	0	0	0	0	0
17.3745	0	0	0	0	0
17.3856	0	0	0	0	0
17.3966	0	0	0	0	0
17.4076	0	0	0	0	0
17.4186	0	0	0	0	0
17.4296	0	0	0	0	0
17.4407	0	0	0	0	0
17.4517	0	0	0	0	0
17.4627	0	0	0	0	0
17.4737	0	0	0	0	0
17.4847	0	0	0	0	0
17.4957	0	0	0	0	0
17.5068	0	0	0	0	0
17.5178	0	0	0	0	0
17.5288	0	0	0	0	0
17.5398	0	0	0	0	0
17.5508	0	0	0	0	0
17.5618	0	0	0	0	0
17.5729	0	0	0	0	0
17.5839	0	0	0	0	0
17.5949	0	0	0	0	0
17.6059	0	0	0	0	0
17.6169	0	0	0	0	0
17.6279	0	0	0	0	0
17.639	0	0	0	0	0
17.65	0	0	0	0	0
17.661	0	0	0	0	0
17.672	0	0	0	0	0
17.683	0	0	0	0	0
17.6941	0	0	0	0	0
17.7051	0	0	0	0	0
17.7161	0	0	0	0	0
17.7271	0	0	0	0	0
17.7381	0	0	0	0	0
17.7491	0	0	0	0	0
17.7602	0	0	0	0	0
17.7712	0	0	0	0	0
17.7822	0	0	0	0	0
17.7932	0	0	0	0	0
17.8042	0	0	0	0	0
17.8152	0	0	0	0	0
17.8263	0	0	0	0	0
17.8373	0	0	0	0	0
17.8483	0	0	0	0	0
17.8593	0	0	0	0	0
17.8703	0	0	0	0	0
17.8813	0	0	0	0	0
17.8924	0	0	0	0	0
17.9034	0	0	0	0	0
17.9144	0	0	0	0	0
17.9254	0	0	0	0	0
17.9364	0	0	0	0	0
17.9475	0	0	0	0	0
17.9585	0	0	0	0	0
17.9695	0	0	0	0	0
17.9805	0	0	0	0	0
17.9915	0	0	0	0	0
18.0025	0	0	0	0	0
18.0136	0	0	0	0	0
18.0246	0	0	0	0	0
18.0356	0	0	0	0	0
18.0466	0	0	0	0	0
18.0576	0	0	0	0	0
18.0686	0	0	0	0	0
18.0797	0	0	0	0	0
18.0907	0	0	0	0	0
18.1017	0	0	0	0	0
18.1127	0	0	0	0	0
18.1237	0	0	0	0	0
18.1348	0	0	0	0	0
18.1458	0	0	0	0	0
18.1568	0	0	0	0	0
18.1678	0	0	0	0	0
18.1788	0	0	0	0	0
18.1898	0	0	0	0	0
18.2009	0	0	0	0	0
18.2119	0	0	0	0	0
18.2229	0	0	0	0	0
18.2339	0	0	0	0	0
18.2449	0	0	0	0	0
18.2559	0	0	0	0	0
18.267	0	0	0	0	0
18.278	0	0	0	0	0
18.289	0	0	0	0	0
18.3	0	0	0	0	0
18.311	0	0	0	0	0
18.322	0	0	0	0	0
18.3331	0	0	0	0	0
18.3441	0	0	0	0	0
18.3551	0	0	0	0	0
18.3661	0	0	0	0	0
18.3771	0	0	0	0	0
18.3882	0	0	0	0	0
18.3992	0	0	0	0	0
18.4102	0	0	0	0	0
18.4212	0	0	0	0	0
18.4322	0	0	0	0	0
18.4432	0	0	0	0	0
18.4543	0	0	0	0	0
18.4653	0	0	0	0	0
18.4763	0	0	0	0	0
18.4873	0	0	0	0	0
18.4983	0	0	0	0	0
18.5093	0	0	0	0	0
18.5204	0	0	0	0	0
18.5314	0	0	0	0	0
18.5424	0	0	0	0	0
18.5534	0	0	0	0	0
18.5644	0	0	0	0	0
18.5754	0	0	0	0	0
18.5865	0	0	0	0	0
18.5975	0	0	0	0	0
18.6085	0	0	0	0	0
18.6195	0	0	0	0	0
18.6305	0	0	0	0	0
18.6416	0	0	0	0	0
18.6526	0	0	0	0	0
18.6636	0	0	0	0	0
18.6746	0	0	0	0	0
18.6856	0	0	0	0	0
18.6966	0	0	0	0	0
18.7077	0	0	0	0	0
18.7187	0	0	0	0	0
18.7297	0	0	0	0	0
18.7407	0	0	0	0	0
18.7517	0	0	0	0	0
18.7627	0	0	0	0	0
18.7738	0	0	0	0	0
18.7848	0	0	0	0	0
18.7958	0	0	0	0	0
18.8068	0	0	0	0	0
18.8178	0	0	0	0	0
18.8289	0	0	0	0	0
18.8399	0	0	0	0	0
18.8509	0	0	0	0	0
18.8619	0	0	0	0	0
18.8729	0	0	0	0	0
18.8839	0	0	0	0	0
18.895	0	0	0	0	0
18.906	0	0	0	0	0
18.917	0	0	0	0	0
18.928	0	0	0	0	0
18.939	0	0	0	0	0
18.95	0	0	0	0	0
18.9611	0	0	0	0	0
18.9721	0	0	0	0	0
18.9831	0	0	0	0	0
18.9941	0	0	0	0	0
19.0051	0	0	0	0	0
19.0161	0	0	0	0	0
19.0272	0	0	0	0	0
19.0382	0	0	0	0	0
19.0492	0	0	0	0	0
19.0602	0	0	0	0	0
19.0712	0	0	0	0	0
19.0823	0	0	0	0	0
19.0933	0	0	0	0	0
19.1043	0	0	0	0	0
19.1153	0	0	0	0	0
19.1263	0	0	0	0	0
19.1373	0	0	0	0	0
19.1484	0	0	0	0	0
19.1594	0	0	0	0	0
19.1704	0	0	0	0	0
19.1814	0	0	0	0	0
19.1924	0	0	0	0	0
19.2034	0	0	0	0	0
19.2145	0	0	0	0	0
19.2255	0	0	0	0	0
19.2365	0	0	0	0	0
19.2475	0	0	0	0	0
19.2585	0	0	0	0	0
19.2696	0	0	0	0	0
19.2806	0	0	0	0	0
19.2916	0	0	0	0	0
19.3026	0	0	0	0	0
19.3136	0	0	0	0	0
19.3246	0	0	0	0	0
19.3357	0	0	0	0	0
19.3467	0	0	0	0	0
19.3577	0	0	0	0	0
19.3687	0	0	0	0	0
19.3797	0	0	0	0	0
19.3907	0	0	0	0	0
19.4018	0	0	0	0	0
19.4128	0	0	0	0	0
19.4238	0	0	0	0	0
19.4348	0	0	0	0	0
19.4458	0	0	0	0	0
19.4568	0	0	0	0	0
19.4679	0	0	0	0	0
19.4789	0	0	0	0	0
19.4899	0	0	0	0	0
19.5009	0	0	0	0	0
19.5119	0	0	0	0	0
19.523	0	0	0	0	0
19.534	0	0	0	0	0
19.545	0	0	0	0	0
19.556	0	0	0	0	0
19.567	0	0	0	0	0
19.578	0	0	0	0	0
19.5891	0	0	0	0	0
19.6001	0	0	0	0	0
19.6111	0	0	0	0	0
19.6221	0	0	0	0	0
19.6331	0	0	0	0	0
19.6441	0	0	0	0	0
19.6552	0	0	0	0	0
19.6662	0	0	0	0	0
19.6772	0	0	0	0	0
19.6882	0	0	0	0	0
19.6992	0	0	0	0	0
19.7102	0	0	0	0	0
19.7213	0	0	0	0	0
19.7323	0	0	0	0	0
19.7433	0	0	0	0	0
19.7543	0	0	0	0	0
19.7653	0	0	0	0	0
19.7764	0	0	0	0	0
19.7874	0	0	0	0	0
19.7984	0	0	0	0	0
19.8094	0	0	0	0	0
19.8204	0	0	0	0	0
19.8314	0	0	0	0	0
19.8425	0	0	0	0	0
19.8535	0	0	0	0	0
19.8645	0	0	0	0	0
19.8755	0	0	0	0	0
19.8865	0	0	0	0	0
19.8975	0	0	0	0	0
19.9086	0	0	0	0	0
19.9196	0	0	0	0	0
19.9306	0	0	0	0	0
19.9416	0	0	0	0	0
19.9526	0	0	0	0	0
19.9637	0	0	0	0	0
19.9747	0	0	0	0	0
19.9857	0	0	0	0	0
19.9967	0	0	0	0	0
20.0077	0	0	0	0	0
20.0187	0	0	0	0	0
20.0298	0	0	0	0	0
20.0408	0	0	0	0	0
20.0518	0	0	0	0	0
20.0628	0	0	0	0	0
20.0738	0	0	0	0	0
20.0848	0	0	0	0	0
20.0959	0	0	0	0	0
20.1069	0	0	0	0	0
20.1179	0	0	0	0	0
20.1289	0	0	0	0	0
20.1399	0	0	0	0	0
20.1509	0	0	0	0	0
20.162	0	0	0	0	0
20.173	0	0	0	0	0
20.184	-1.92	0.72	-2.39	-0.59	-2.53
20.195	-2.01	0.56	-2.56	-0.97	-2.5
20.206	-1.94	-0.41	-2.8	-1.33	-2.65
20.2171	-1.75	-2.71	-3.18	-2.44	-3.12
20.2281	-1.68	-4.86	-4.11	-3.8	-3.49
20.2391	-1.8	-6.22	-4.68	-5.01	-4.05
20.2501	-3.46	-6.83	-4.99	-5.5	-4.45
20.2611	-5.65	-6.86	-5.07	-5.42	-4.62
20.2721	-7.35	-6.73	-5.1	-4.89	-4.85
20.2832	-8.68	-5.97	-4.75	-3.96	-4.81
20.2942	-9.58	-5.24	-4.57	-3.43	-4.7
20.3052	-9.81	-4.09	-4.07	-2.56	-4.53
20.3162	-9.1	-3.09	-3.76	-1.99	-4.31
20.3272	-8.23	-2.63	-3.63	-1.65	-4.09
20.3382	-7.2	-2.3	-3.27	-2.04	-4.11
20.3493	-5.93	-2.32	-3.49	-2.91	-3.98
20.3603	-4.97	-2.61	-3.61	-3.91	-3.76
20.3713	-4.34	-3.4	-3.66	-4.28	-3.82
20.3823	-3.61	-4.19	-4.13	-4.25	-3.88
20.3933	-3.07	-4.75	-4.35	-4.17	-3.94
20.4043	-2.95	-5.09	-4.46	-3.83	-4.02
20.4154	-3.48	-5.25	-4.49	-3.09	-3.97
20.4264	-4.09	-4.84	-4.26	-2.26	-4.08
20.4374	-5.23	-4.42	-3.9	-1.84	-4.1
20.4484	-5.87	-3.94	-3.76	-1.66	-4.13
20.4594	-6.01	-3.44	-3.73	-2.17	-4.06
20.4705	-5.8	-2.88	-3.53	-3.09	-4.21
20.4815	-5.49	-2.63	-3.66	-4.08	-3.96
20.4925	-4.86	-2.93	-3.97	-4.64	-3.95
20.5035	-4.11	-3.2	-4.13	-4.93	-3.87
20.5145	-3.59	-3.8	-4.34	-4.76	-3.94
20.5255	-3.27	-4.52	-4.54	-4.26	-4.23
20.5366	-3.24	-4.91	-4.45	-4.04	-4.23
20.5476	-3.47	-4.87	-4.28	-3.49	-4.3
20.5586	-4.03	-4.8	-4.18	-2.99	-4.42
20.5696	-4.5	-4.24	-3.86	-2.85	-4.42
20.5806	-4.67	-3.75	-3.83	-2.88	-4.31
20.5916	-4.66	-3.06	-3.6	-3.16	-4.03
20.6027	-4.49	-2.72	-3.76	-3.47	-4.13
20.6137	-4.13	-2.48	-3.61	-3.91	-4.11
20.6247	-4.08	-2.92	-3.86	-4.43	-4.04
20.6357	-3.51	-3.35	-4.06	-4.53	-3.95
20.6467	-3.4	-3.96	-4.21	-4.45	-3.95
20.6578	-3.22	-4.5	-4.6	-4.08	-3.94
20.6688	-3.24	-4.75	-4.52	-3.67	-3.86
20.6798	-3.67	-4.89	-4.64	-3.11	-3.88
20.6908	-4.24	-4.55	-4.37	-3.04	-4.2
20.7018	-4.62	-4.27	-3.87	-2.77	-4.33
20.7128	-4.85	-3.85	-3.76	-2.54	-4.44
20.7239	-4.98	-3.35	-3.62	-2.82	-4.64
20.7349	-4.62	-2.85	-3.61	-3.45	-4.68
20.7459	-4.25	-2.56	-3.91	-3.93	-4.44
20.7569	-3.8	-2.84	-4.37	-4.13	-4.23
20.7679	-3.42	-3.37	-4.53	-4.2	-4.15
20.7789	-3.06	-4.2	-4.54	-4.19	-3.86
20.79	-3.19	-4.57	-4.64	-4.16	-3.66
20.801	-3.52	-4.9	-4.22	-4.01	-3.6
20.812	-3.77	-4.92	-3.94	-3.93	-3.63
20.823	-4.48	-4.53	-3.83	-3.54	-3.58
20.834	-4.88	-4.25	-3.6	-3.09	-3.74
20.845	-5.04	-3.65	-3.68	-2.65	-4.08
20.8561	-4.95	-3.35	-3.87	-2.68	-4.38
20.8671	-4.54	-2.89	-4.03	-2.74	-4.44
20.8781	-4.4	-2.74	-4.29	-3.16	-4.42
20.8891	-4.01	-2.93	-4.65	-3.85	-4.24
20.9001	-3.23	-3.49	-4.51	-4.45	-4.13
20.9112	-2.72	-4.33	-4.48	-4.77	-4.17
20.9222	-2.55	-5	-4.28	-4.99	-4.05
20.9332	-3.07	-5.07	-3.87	-4.94	-3.92
20.9442	-4.13	-5.17	-3.88	-4.9	-3.77
20.9552	-5.21	-4.81	-3.54	-4.81	-3.68
20.9662	-6.15	-4.41	-3.68	-4.28	-3.78
20.9773	-6.25	-3.89	-3.88	-3.65	-3.72
20.9883	-5.39	-3.38	-3.97	-3.09	-3.82
20.9993	-4.49	-3.02	-3.92	-2.66	-4.11
21.0103	-3.87	-2.77	-4.27	-2.49	-4.19
21.0213	-3.67	-2.62	-4.46	-2.46	-4.4
21.0323	-3.43	-2.8	-4.81	-2.93	-4.52
21.0434	-3.48	-3.33	-4.81	-3.53	-4.47
21.0544	-3.8	-3.98	-4.58	-4.24	-4.3
21.0654	-4.26	-4.76	-4.38	-4.75	-4.12
21.0764	-4.54	-5	-4.32	-5.1	-4.13
21.0874	-4.94	-5.19	-4.05	-4.83	-3.91
21.0984	-4.71	-4.81	-4.07	-4.32	-4.06
21.1095	-4.33	-4.3	-4.13	-3.85	-3.97
21.1205	-3.83	-4.01	-3.77	-3.2	-4.02
21.1315	-3.4	-3.7	-3.55	-2.39	-4.22
21.1425	-3.39	-3.07	-3.21	-1.88	-4.27
21.1535	-3.61	-3.09	-3.4	-1.6	-4.34
21.1646	-4.09	-2.98	-3.38	-1.8	-4.25
21.1756	-4.77	-2.96	-3.75	-2.57	-4.15
21.1866	-5.28	-2.95	-4.11	-3.25	-4.01
21.1976	-5.32	-3.87	-4.02	-4.22	-4.01
21.2086	-5.33	-4.47	-4.35	-5.03	-4
21.2196	-4.76	-5.01	-4.42	-5	-3.97
21.2307	-4.52	-5.01	-4.33	-4.68	-3.97
21.2417	-4.36	-5.08	-4.03	-3.95	-4.04
21.2527	-4.2	-4.93	-3.83	-3.34	-4.23
21.2637	-3.99	-4.43	-3.76	-2.44	-4.49
21.2747	-3.8	-3.97	-3.55	-1.99	-4.62
21.2857	-3.93	-3.34	-3.57	-1.72	-4.45
21.2968	-4.21	-2.71	-3.57	-1.97	-4.6
21.3078	-4.79	-2.61	-3.87	-3.03	-4.56
21.3188	-5.26	-2.86	-4.15	-3.99	-4.33
21.3298	-5.35	-3.44	-4.15	-4.75	-4.16
21.3408	-5.14	-3.99	-4.17	-5.02	-4.05
21.3519	-4.89	-4.73	-4.02	-5.03	-4.09
21.3629	-4.42	-4.84	-3.82	-4.72	-3.91
21.3739	-4.27	-5.05	-4.03	-4.28	-3.77
21.3849	-3.89	-4.67	-3.9	-3.78	-3.73
21.3959	-3.71	-4.43	-3.77	-3.4	-3.73
21.4069	-3.64	-3.97	-3.72	-3.1	-4.05
21.418	-3.71	-3.57	-3.9	-2.65	-4.15
21.429	-4.22	-3.39	-4.02	-2.63	-4.62
21.44	-4.66	-3.26	-4.1	-2.55	-4.84
21.451	-4.9	-3.26	-4.3	-2.93	-4.81
21.462	-4.6	-3.04	-4.41	-3.4	-4.9
21.473	-4.08	-3.46	-4.38	-3.96	-4.64
21.4841	-3.84	-3.47	-4.09	-4.49	-4.43
21.4951	-3.89	-3.56	-3.91	-4.69	-4.34
21.5061	-3.71	-3.61	-3.71	-4.65	-4.25
21.5171	-3.8	-3.64	-3.57	-4.26	-4.13
21.5281	-4.19	-3.67	-3.53	-4.28	-4.03
21.5391	-4.79	-3.76	-3.75	-3.87	-3.9
21.5502	-5.1	-4.05	-4.05	-3.3	-4.1
21.5612	-5.13	-4.16	-4.13	-3.22	-4.05
21.5722	-4.66	-4.01	-4.31	-3.2	-4.13
21.5832	-4.41	-3.92	-4.2	-3.21	-4.12
21.5942	-3.93	-3.51	-4.41	-3.28	-4.1
21.6053	-3.55	-3.18	-4.47	-3.4	-3.9
21.6163	-3.63	-3.12	-4.36	-3.32	-3.88
21.6273	-3.89	-3.1	-3.99	-3	-3.9
21.6383	-4.12	-3.22	-3.74	-2.48	-4.05
21.6493	-4.6	-3.3	-3.54	-2.36	-4.15
21.6603	-4.75	-3.62	-3.49	-2.79	-4.41
21.6714	-4.68	-3.59	-3.76	-3.46	-4.59
21.6824	-4.37	-3.62	-4.09	-3.9	-4.52
21.6934	-4.12	-3.62	-4.32	-4.15	-4.73
21.7044	-3.91	-3.6	-4.47	-4.6	-4.69
21.7154	-3.92	-3.5	-4.4	-4.54	-4.4
21.7264	-3.79	-3.72	-4.29	-4.53	-4.36
21.7375	-4.29	-3.73	-4.08	-4.32	-4.16
21.7485	-4.47	-3.83	-3.84	-3.77	-3.92
21.7595	-4.9	-3.83	-3.59	-3.58	-3.89
21.7705	-4.96	-3.9	-3.53	-3.15	-3.95
21.7815	-4.72	-3.77	-3.49	-2.8	-4.1
21.7926	-4.49	-3.87	-3.67	-2.29	-4.14
21.8036	-4.33	-3.93	-3.85	-2.3	-4.31
21.8146	-4.12	-3.93	-4.01	-2.63	-4.46
21.8256	-3.79	-3.86	-4.56	-3.1	-4.84
21.8366	-3.72	-3.86	-4.52	-3.72	-4.82
21.8476	-3.83	-3.98	-4.54	-4.04	-4.72
21.8587	-3.83	-3.87	-4.66	-3.94	-4.71
21.8697	-4.44	-3.99	-4.51	-3.87	-4.49
21.8807	-5.03	-3.99	-4.32	-3.62	-4.49
21.8917	-5.43	-3.94	-3.93	-3.5	-4.3
21.9027	-5.44	-4.08	-3.73	-3.38	-4.25
21.9137	-5.26	-4.2	-3.63	-3.48	-4.25
21.9248	-4.76	-4.15	-3.59	-3.88	-4.34
21.9358	-4.37	-4.1	-3.83	-4.09	-4.32
21.9468	-4.33	-3.88	-4.2	-4.3	-4.4
21.9578	-4.2	-3.51	-4.23	-4.38	-4.65
21.9688	-4.16	-3.33	-4.52	-4.2	-4.67
21.9798	-3.58	-3.07	-4.43	-3.88	-4.45
21.9909	-3.42	-3.17	-4.44	-3.3	-4.33
22.0019	-3.68	-2.99	-4.24	-2.95	-4.21
22.0129	-4.03	-3.16	-4.12	-2.84	-4.21
22.0239	-4.61	-3.45	-3.88	-3.06	-4.09
[truncated: 291 more rows]

## Sheet: ED Figure 2D
Title: 3 Date: 2021/10/13 13:55
Parameters for step (1): Holding dF/F0: 0.0 % Exposure time: 10 ms Binning: 1x1
Parameters for step (2): Holding dF/F0: -5.0 %
Parameters for step (3): Holding dF/F0: 5.0 %
Bleaching correction function: exp. offset = 1332,44 * exp(-0,0014 * x) + 7211,16 R^2: 0,9874 Video duration: 27,83 s Framerate: 90,56
P: 5.8 I: 90.0 D: 0.1
# Measurement	Time	F	F_Kalman	F_bleach_correct	dF/F0	dF/F0_bleach_correct	Wavelength	Info	Step
0	0.011	8940.28	8940.28	0	?	0	525	Current dF/F0 smaller than holding dF/F0 (5.0 %). --> Change wavelength by 0.0 nm	-
1	0.0221	8919.09	8934.67	0	?	0	525	Calibration	-
2	0.0331	8857.79	8914.32	0	?	0	525	Calibration	-
3	0.0442	8786.99	8880.62	0	?	0	525	Calibration	-
4	0.0552	8615.78	8810.51	0	?	0	525	Calibration	-
5	0.0663	8508.72	8730.63	0	?	0	525	Calibration	-
6	0.0773	8506.26	8671.24	0	?	0	525	Calibration	-
7	0.0883	8495.48	8624.71	0	?	0	525	Calibration	-
8	0.0994	8496.84	8590.86	0	?	0	525	Calibration	-
9	0.1104	8449.56	8553.46	0	?	0	525	Calibration	-
10	0.1215	8467.95	8530.83	0	?	0	525	Calibration	-
11	0.1325	8448.34	8508.99	0	?	0	525	Calibration	-
12	0.1436	8436.52	8489.81	0	?	0	525	Calibration	-
13	0.1546	8394.07	8464.47	0	?	0	525	Calibration	-
14	0.1656	8417.04	8451.91	0	?	0	525	Calibration	-
15	0.1767	8442.76	8449.49	0	?	0	525	Calibration	-
16	0.1877	8438.33	8446.54	0	?	0	525	Calibration	-
17	0.1988	8447.65	8446.83	0	?	0	525	Calibration	-
18	0.2098	8430.68	8442.55	0	?	0	525	Calibration	-
19	0.2209	8431.21	8439.55	0	?	0	525	Calibration	-
20	0.2319	8468.04	8447.09	0	?	0	525	Calibration	-
21	0.2429	8471.03	8453.43	0	?	0	525	Calibration	-
22	0.254	8471.44	8458.2	0	?	0	525	Calibration	-
23	0.265	8456.59	8457.77	0	?	0	525	Calibration	-
24	0.2761	8484.69	8464.9	0	?	0	525	Calibration	-
25	0.2871	8489.94	8471.53	0	?	0	525	Calibration	-
26	0.2982	8471.09	8471.41	0	?	0	525	Calibration	-
27	0.3092	8495	8477.66	0	?	0	525	Calibration	-
28	0.3202	8465.49	8474.43	0	?	0	525	Calibration	-
29	0.3313	8496.2	8480.2	0	?	0	525	Calibration	-
30	0.3423	8489.08	8482.55	0	?	0	525	Calibration	-
31	0.3534	8489.14	8484.29	0	?	0	525	Calibration	-
32	0.3644	8491.27	8486.14	0	?	0	525	Calibration	-
33	0.3755	8453.27	8477.44	0	?	0	525	Calibration	-
34	0.3865	8451.57	8470.59	0	?	0	525	Calibration	-
35	0.3975	8456.83	8466.95	0	?	0	525	Calibration	-
36	0.4086	8489.93	8473.03	0	?	0	525	Calibration	-
37	0.4196	8455.24	8468.32	0	?	0	525	Calibration	-
38	0.4307	8482.59	8472.1	0	?	0	525	Calibration	-
39	0.4417	8462.16	8469.47	0	?	0	525	Calibration	-
40	0.4528	8475.01	8470.94	0	?	0	525	Calibration	-
41	0.4638	8465.81	8469.58	0	?	0	525	Calibration	-
42	0.4748	8480.98	8472.6	0	?	0	525	Calibration	-
43	0.4859	8507.61	8481.87	0	?	0	525	Calibration	-
44	0.4969	8456.4	8475.12	0	?	0	525	Calibration	-
45	0.508	8449.1	8468.24	0	?	0	525	Calibration	-
46	0.519	8424.44	8456.64	0	?	0	525	Calibration	-
47	0.5301	8450.1	8454.91	0	?	0	525	Calibration	-
48	0.5411	8463.43	8457.17	0	?	0	525	Calibration	-
49	0.5521	8488.5	8465.46	0	?	0	525	Calibration	-
50	0.5632	8444.98	8460.04	0	?	0	525	Calibration	-
51	0.5742	8412.17	8447.37	0	?	0	525	Calibration	-
52	0.5853	8452.2	8448.65	0	?	0	525	Calibration	-
53	0.5963	8445.94	8447.93	0	?	0	525	Calibration	-
54	0.6074	8471.03	8454.04	0	?	0	525	Calibration	-
55	0.6184	8424.26	8446.16	0	?	0	525	Calibration	-
56	0.6294	8407.69	8435.98	0	?	0	525	Calibration	-
57	0.6405	8417.22	8431.01	0	?	0	525	Calibration	-
58	0.6515	8483.42	8444.88	0	?	0	525	Calibration	-
59	0.6626	8468.6	8451.16	0	?	0	525	Calibration	-
60	0.6736	8482.33	8459.41	0	?	0	525	Calibration	-
61	0.6847	8424.69	8450.22	0	?	0	525	Calibration	-
62	0.6957	8423.61	8443.18	0	?	0	525	Calibration	-
63	0.7067	8404.01	8432.81	0	?	0	525	Calibration	-
64	0.7178	8444.3	8435.85	0	?	0	525	Calibration	-
65	0.7288	8446.26	8438.61	0	?	0	525	Calibration	-
66	0.7399	8468.51	8446.52	0	?	0	525	Calibration	-
67	0.7509	8456.53	8449.17	0	?	0	525	Calibration	-
68	0.762	8441.91	8447.25	0	?	0	525	Calibration	-
69	0.773	8412.33	8438.01	0	?	0	525	Calibration	-
70	0.784	8431.23	8436.21	0	?	0	525	Calibration	-
71	0.7951	8459.67	8442.42	0	?	0	525	Calibration	-
72	0.8061	8446.44	8443.48	0	?	0	525	Calibration	-
73	0.8172	8462.25	8448.45	0	?	0	525	Calibration	-
74	0.8282	8473.26	8455.02	0	?	0	525	Calibration	-
75	0.8393	8452.4	8454.32	0	?	0	525	Calibration	-
76	0.8503	8436.53	8449.61	0	?	0	525	Calibration	-
77	0.8613	8414.36	8440.28	0	?	0	525	Calibration	-
78	0.8724	8409.56	8432.15	0	?	0	525	Calibration	-
79	0.8834	8458.85	8439.22	0	?	0	525	Calibration	-
80	0.8945	8483.36	8450.91	0	?	0	525	Calibration	-
81	0.9055	8446.53	8449.75	0	?	0	525	Calibration	-
82	0.9166	8422.22	8442.46	0	?	0	525	Calibration	-
83	0.9276	8387.22	8427.84	0	?	0	525	Calibration	-
84	0.9386	8376.17	8414.16	0	?	0	525	Calibration	-
85	0.9497	8456.82	8425.45	0	?	0	525	Calibration	-
86	0.9607	8478.24	8439.43	0	?	0	525	Calibration	-
87	0.9718	8475.92	8449.09	0	?	0	525	Calibration	-
88	0.9828	8403.89	8437.12	0	?	0	525	Calibration	-
89	0.9939	8431.14	8435.54	0	?	0	525	Calibration	-
90	1.0049	8398.47	8425.72	0	?	0	525	Calibration	-
91	1.0159	8425.43	8425.65	0	?	0	525	Calibration	-
92	1.027	8437.4	8428.76	0	?	0	525	Calibration	-
93	1.038	8442.29	8432.34	0	?	0	525	Calibration	-
94	1.0491	8425.56	8430.55	0	?	0	525	Calibration	-
95	1.0601	8479.54	8443.51	0	?	0	525	Calibration	-
96	1.0712	8479.95	8453.16	0	?	0	525	Calibration	-
97	1.0822	8439.34	8449.5	0	?	0	525	Calibration	-
98	1.0932	8369.25	8428.26	0	?	0	525	Calibration	-
99	1.1043	8434.12	8429.81	0	?	0	525	Calibration	-
100	1.1153	8415.76	8426.09	0	?	0	525	Calibration	-
101	1.1264	8386.47	8415.6	0	?	0	525	Calibration	-
102	1.1374	8377.8	8405.6	0	?	0	525	Calibration	-
103	1.1485	8362.94	8394.31	0	?	0	525	Calibration	-
104	1.1595	8373.81	8388.88	0	?	0	525	Calibration	-
105	1.1705	8388.88	8388.88	0	?	0	525	Calibration	-
106	1.1816	8363.51	8382.16	0	?	0	525	Calibration	-
107	1.1926	8339.21	8370.79	0	?	0	525	Calibration	-
108	1.2037	8359.17	8367.72	0	?	0	525	Calibration	-
109	1.2147	8351.79	8363.5	0	?	0	525	Calibration	-
110	1.2258	8392.85	8371.27	0	?	0	525	Calibration	-
111	1.2368	8323.33	8358.58	0	?	0	525	Calibration	-
112	1.2478	8305.97	8344.65	0	?	0	525	Calibration	-
113	1.2589	8353.66	8347.04	0	?	0	525	Calibration	-
114	1.2699	8315.29	8338.63	0	?	0	525	Calibration	-
115	1.281	8318.66	8333.35	0	?	0	525	Calibration	-
116	1.292	8325.28	8331.21	0	?	0	525	Calibration	-
117	1.3031	8316.53	8327.33	0	?	0	525	Calibration	-
118	1.3141	8337.85	8330.11	0	?	0	525	Calibration	-
119	1.3251	8351.46	8335.76	0	?	0	525	Calibration	-
120	1.3362	8400.79	8352.98	0	?	0	525	Calibration	-
121	1.3472	8399.71	8365.35	0	?	0	525	Calibration	-
122	1.3583	8392.58	8372.56	0	?	0	525	Calibration	-
123	1.3693	8381.58	8374.95	0	?	0	525	Calibration	-
124	1.3804	8348.38	8367.91	0	?	0	525	Calibration	-
125	1.3914	8345.25	8361.91	0	?	0	525	Calibration	-
126	1.4024	8345.39	8357.54	0	?	0	525	Calibration	-
127	1.4135	8334.99	8351.57	0	?	0	525	Calibration	-
128	1.4245	8347.74	8350.56	0	?	0	525	Calibration	-
129	1.4356	8298.23	8336.7	0	?	0	525	Calibration	-
130	1.4466	8324.93	8333.59	0	?	0	525	Calibration	-
131	1.4577	8305.51	8326.15	0	?	0	525	Calibration	-
132	1.4687	8312.73	8322.6	0	?	0	525	Calibration	-
133	1.4797	8286.47	8313.04	0	?	0	525	Calibration	-
134	1.4908	8274.59	8302.86	0	?	0	525	Calibration	-
135	1.5018	8322.86	8308.16	0	?	0	525	Calibration	-
136	1.5129	8325.23	8312.68	0	?	0	525	Calibration	-
137	1.5239	8311.93	8312.48	0	?	0	525	Calibration	-
138	1.535	8290.49	8306.66	0	?	0	525	Calibration	-
139	1.546	8281.43	8299.98	0	?	0	525	Calibration	-
140	1.557	8238.81	8283.79	0	?	0	525	Calibration	-
141	1.5681	8294.96	8286.74	0	?	0	525	Calibration	-
142	1.5791	8257.67	8279.05	0	?	0	525	Calibration	-
143	1.5902	8237.77	8268.12	0	?	0	525	Calibration	-
144	1.6012	8264.81	8267.25	0	?	0	525	Calibration	-
145	1.6123	8248.19	8262.2	0	?	0	525	Calibration	-
146	1.6233	8253.12	8259.8	0	?	0	525	Calibration	-
147	1.6343	8306.05	8272.04	0	?	0	525	Calibration	-
148	1.6454	8228.28	8260.46	0	?	0	525	Calibration	-
149	1.6564	8256.61	8259.44	0	?	0	525	Calibration	-
150	1.6675	8286	8266.47	0	?	0	525	Calibration	-
151	1.6785	8252.58	8262.79	0	?	0	525	Calibration	-
152	1.6896	8200.92	8246.42	0	?	0	525	Calibration	-
153	1.7006	8266.42	8251.71	0	?	0	525	Calibration	-
154	1.7116	8286.53	8260.93	0	?	0	525	Calibration	-
155	1.7227	8265.45	8262.12	0	?	0	525	Calibration	-
156	1.7337	8305.46	8273.59	0	?	0	525	Calibration	-
157	1.7448	8302.27	8281.19	0	?	0	525	Calibration	-
158	1.7558	8305.39	8287.59	0	?	0	525	Calibration	-
159	1.7669	8276.3	8284.6	0	?	0	525	Calibration	-
160	1.7779	8273.15	8281.57	0	?	0	525	Calibration	-
161	1.7889	8265.76	8277.39	0	?	0	525	Calibration	-
162	1.8	8263.71	8273.76	0	?	0	525	Calibration	-
163	1.811	8238.35	8264.39	0	?	0	525	Calibration	-
164	1.8221	8224.46	8253.82	0	?	0	525	Calibration	-
165	1.8331	8270	8258.1	0	?	0	525	Calibration	-
166	1.8442	8316.15	8273.47	0	?	0	525	Calibration	-
167	1.8552	8345.1	8292.43	0	?	0	525	Calibration	-
168	1.8662	8272.57	8287.17	0	?	0	525	Calibration	-
169	1.8773	8217.38	8268.7	0	?	0	525	Calibration	-
170	1.8883	8244.74	8262.36	0	?	0	525	Calibration	-
171	1.8994	8261.07	8262.02	0	?	0	525	Calibration	-
172	1.9104	8246.7	8257.96	0	?	0	525	Calibration	-
173	1.9215	8250.83	8256.07	0	?	0	525	Calibration	-
174	1.9325	8275.21	8261.14	0	?	0	525	Calibration	-
175	1.9435	8290	8268.78	0	?	0	525	Calibration	-
176	1.9546	8255.89	8265.37	0	?	0	525	Calibration	-
177	1.9656	8182.64	8243.47	0	?	0	525	Calibration	-
178	1.9767	8277.01	8252.35	0	?	0	525	Calibration	-
179	1.9877	8246.84	8250.89	0	?	0	525	Calibration	-
180	1.9988	8240.97	8248.26	0	?	0	525	Calibration	-
181	2.0098	8242.22	8246.66	0	?	0	525	Calibration	-
182	2.0208	8250.02	8247.55	0	?	0	525	Calibration	-
183	2.0319	8227	8242.11	0	?	0	525	Calibration	-
184	2.0429	8248.03	8243.68	0	?	0	525	Calibration	-
185	2.054	8201.64	8232.55	0	?	0	525	Calibration	-
186	2.065	8237.83	8233.95	0	?	0	525	Calibration	-
187	2.0761	8248.69	8237.85	0	?	0	525	Calibration	-
188	2.0871	8229.78	8235.71	0	?	0	525	Calibration	-
189	2.0981	8222.23	8232.14	0	?	0	525	Calibration	-
190	2.1092	8261.04	8239.79	0	?	0	525	Calibration	-
191	2.1202	8241.33	8240.2	0	?	0	525	Calibration	-
192	2.1313	8223.65	8235.82	0	?	0	525	Calibration	-
193	2.1423	8256.53	8241.3	0	?	0	525	Calibration	-
194	2.1534	8213.07	8233.83	0	?	0	525	Calibration	-
195	2.1644	8204.52	8226.07	0	?	0	525	Calibration	-
196	2.1754	8188.18	8216.04	0	?	0	525	Calibration	-
197	2.1865	8195.61	8210.63	0	?	0	525	Calibration	-
198	2.1975	8181.6	8202.95	0	?	0	525	Calibration	-
199	2.2086	8206.94	8204.01	0	?	0	525	Calibration	-
200	2.2196	8201.26	8203.28	0	?	0	525	Calibration	-
201	2.2307	8199.62	8202.31	0	?	0	525	Calibration	-
202	2.2417	8140.96	8186.07	0	?	0	525	Calibration	-
203	2.2527	8131.49	8171.62	0	?	0	525	Calibration	-
204	2.2638	8202.65	8179.83	0	?	0	525	Calibration	-
205	2.2748	8257.91	8200.5	0	?	0	525	Calibration	-
206	2.2859	8195.25	8199.11	0	?	0	525	Calibration	-
207	2.2969	8180.8	8194.26	0	?	0	525	Calibration	-
208	2.308	8188.44	8192.72	0	?	0	525	Calibration	-
209	2.319	8202.17	8195.22	0	?	0	525	Calibration	-
210	2.33	8191.14	8194.14	0	?	0	525	Calibration	-
211	2.3411	8185.94	8191.97	0	?	0	525	Calibration	-
212	2.3521	8189.26	8191.25	0	?	0	525	Calibration	-
213	2.3632	8202.81	8194.31	0	?	0	525	Calibration	-
214	2.3742	8179.06	8190.28	0	?	0	525	Calibration	-
215	2.3853	8141.54	8177.38	0	?	0	525	Calibration	-
216	2.3963	8147.82	8169.55	0	?	0	525	Calibration	-
217	2.4073	8135.06	8160.42	0	?	0	525	Calibration	-
218	2.4184	8151.91	8158.17	0	?	0	525	Calibration	-
219	2.4294	8173.39	8162.2	0	?	0	525	Calibration	-
220	2.4405	8162.91	8162.38	0	?	0	525	Calibration	-
221	2.4515	8163.65	8162.72	0	?	0	525	Calibration	-
222	2.4626	8156.15	8160.98	0	?	0	525	Calibration	-
223	2.4736	8206.79	8173.11	0	?	0	525	Calibration	-
224	2.4846	8186.5	8176.65	0	?	0	525	Calibration	-
225	2.4957	8197.76	8182.24	0	?	0	525	Calibration	-
226	2.5067	8211.2	8189.9	0	?	0	525	Calibration	-
227	2.5178	8288.06	8215.89	0	?	0	525	Calibration	-
228	2.5288	8237.01	8221.48	0	?	0	525	Calibration	-
229	2.5399	8196.53	8214.88	0	?	0	525	Calibration	-
230	2.5509	8185.6	8207.13	0	?	0	525	Calibration	-
231	2.5619	8174.25	8198.42	0	?	0	525	Calibration	-
232	2.573	8159.99	8188.25	0	?	0	525	Calibration	-
233	2.584	8136.4	8174.52	0	?	0	525	Calibration	-
234	2.5951	8184.93	8177.28	0	?	0	525	Calibration	-
235	2.6061	8192.7	8181.36	0	?	0	525	Calibration	-
236	2.6172	8174.91	8179.65	0	?	0	525	Calibration	-
237	2.6282	8165.41	8175.88	0	?	0	525	Calibration	-
238	2.6392	8157.64	8171.05	0	?	0	525	Calibration	-
239	2.6503	8120.97	8157.79	0	?	0	525	Calibration	-
240	2.6613	8147.16	8154.98	0	?	0	525	Calibration	-
241	2.6724	8120.31	8145.8	0	?	0	525	Calibration	-
242	2.6834	8113.91	8137.36	0	?	0	525	Calibration	-
243	2.6945	8141.7	8138.51	0	?	0	525	Calibration	-
244	2.7055	8120.39	8133.71	0	?	0	525	Calibration	-
245	2.7165	8133.81	8133.74	0	?	0	525	Calibration	-
246	2.7276	8156.99	8139.89	0	?	0	525	Calibration	-
247	2.7386	8108.06	8131.47	0	?	0	525	Calibration	-
248	2.7497	8123	8129.23	0	?	0	525	Calibration	-
249	2.7607	8156.14	8136.35	0	?	0	525	Calibration	-
250	2.7718	8145.76	8138.84	0	?	0	525	Calibration	-
251	2.7828	8148.05	8141.28	0	?	0	525	Calibration	-
252	2.7938	8146.23	8142.59	0	?	0	525	Calibration	-
253	2.8049	8143.99	8142.96	0	?	0	525	Calibration	-
254	2.8159	8113.66	8135.2	0	?	0	525	Calibration	-
255	2.827	8111.96	8129.05	0	?	0	525	Calibration	-
256	2.838	8118.62	8126.29	0	?	0	525	Calibration	-
257	2.8491	8093.12	8117.51	0	?	0	525	Calibration	-
258	2.8601	8093.96	8111.28	0	?	0	525	Calibration	-
259	2.8711	8108.04	8110.42	0	?	0	525	Calibration	-
260	2.8822	8125.69	8114.46	0	?	0	525	Calibration	-
261	2.8932	8130.82	8118.79	0	?	0	525	Calibration	-
262	2.9043	8159.18	8129.48	0	?	0	525	Calibration	-
263	2.9153	8168.25	8139.74	0	?	0	525	Calibration	-
264	2.9264	8159.35	8144.94	0	?	0	525	Calibration	-
265	2.9374	8145.19	8145	0	?	0	525	Calibration	-
266	2.9484	8143.84	8144.7	0	?	0	525	Calibration	-
267	2.9595	8148.83	8145.79	0	?	0	525	Calibration	-
268	2.9705	8175.28	8153.6	0	?	0	525	Calibration	-
269	2.9816	8167.69	8157.33	0	?	0	525	Calibration	-
270	2.9926	8237.58	8178.57	0	?	0	525	Calibration	-
271	3.0037	8248	8196.95	0	?	0	525	Calibration	-
272	3.0147	8202.14	8198.32	0	?	0	525	Calibration	-
273	3.0257	8164.17	8189.28	0	?	0	525	Calibration	-
274	3.0368	8102.99	8166.44	0	?	0	525	Calibration	-
275	3.0478	8155.56	8163.56	0	?	0	525	Calibration	-
276	3.0589	8083.57	8142.39	0	?	0	525	Calibration	-
277	3.0699	8106.02	8132.76	0	?	0	525	Calibration	-
278	3.081	8094.74	8122.7	0	?	0	525	Calibration	-
279	3.092	8048.1	8102.95	0	?	0	525	Calibration	-
280	3.103	8055.29	8090.34	0	?	0	525	Calibration	-
281	3.1141	8052.67	8080.36	0	?	0	525	Calibration	-
282	3.1251	8056.62	8074.08	0	?	0	525	Calibration	-
283	3.1362	8085.36	8077.07	0	?	0	525	Calibration	-
284	3.1472	8090.67	8080.67	0	?	0	525	Calibration	-
285	3.1583	8110.61	8088.59	0	?	0	525	Calibration	-
286	3.1693	8113.68	8095.23	0	?	0	525	Calibration	-
287	3.1803	8099.18	8096.28	0	?	0	525	Calibration	-
288	3.1914	8080.85	8092.2	0	?	0	525	Calibration	-
289	3.2024	8085.59	8090.45	0	?	0	525	Calibration	-
290	3.2135	8081.6	8088.11	0	?	0	525	Calibration	-
291	3.2245	8100.12	8091.29	0	?	0	525	Calibration	-
292	3.2356	8086.56	8090.04	0	?	0	525	Calibration	-
293	3.2466	8071.66	8085.17	0	?	0	525	Calibration	-
294	3.2576	8066.22	8080.15	0	?	0	525	Calibration	-
295	3.2687	8129.05	8093.1	0	?	0	525	Calibration	-
296	3.2797	8133.09	8103.69	0	?	0	525	Calibration	-
297	3.2908	8111.5	8105.75	0	?	0	525	Calibration	-
298	3.3018	8062.23	8094.23	0	?	0	525	Calibration	-
299	3.3129	8078.2	8089.99	0	?	0	525	Calibration	-
300	3.3239	8103.29	8093.51	0	?	0	525	Calibration	-
301	3.3349	8140.15	8105.85	0	?	0	525	Calibration	-
302	3.346	8132.18	8112.82	0	?	0	525	Calibration	-
303	3.357	8120.83	8114.94	0	?	0	525	Calibration	-
304	3.3681	8104.73	8112.24	0	?	0	525	Calibration	-
305	3.3791	8061.1	8098.7	0	?	0	525	Calibration	-
306	3.3902	8086.42	8095.45	0	?	0	525	Calibration	-
307	3.4012	8103.88	8097.68	0	?	0	525	Calibration	-
308	3.4122	8070.75	8090.55	0	?	0	525	Calibration	-
309	3.4233	8086.43	8089.46	0	?	0	525	Calibration	-
310	3.4343	8084.36	8088.11	0	?	0	525	Calibration	-
311	3.4454	8105.23	8092.64	0	?	0	525	Calibration	-
312	3.4564	8063.35	8084.89	0	?	0	525	Calibration	-
313	3.4675	8079.83	8083.55	0	?	0	525	Calibration	-
314	3.4785	8044.4	8073.19	0	?	0	525	Calibration	-
315	3.4895	8041.4	8064.77	0	?	0	525	Calibration	-
316	3.5006	8066.59	8065.25	0	?	0	525	Calibration	-
317	3.5116	8071.18	8066.82	0	?	0	525	Calibration	-
318	3.5227	8051.2	8062.69	0	?	0	525	Calibration	-
319	3.5337	8008.69	8048.39	0	?	0	525	Calibration	-
320	3.5448	8009.81	8038.18	0	?	0	525	Calibration	-
321	3.5558	8053.73	8042.3	0	?	0	525	Calibration	-
322	3.5668	8023.42	8037.3	0	?	0	525	Calibration	-
323	3.5779	7976.72	8021.26	0	?	0	525	Calibration	-
324	3.5889	8069.18	8033.95	0	?	0	525	Calibration	-
325	3.6	8024.62	8031.48	0	?	0	525	Calibration	-
326	3.611	8044.48	8034.92	0	?	0	525	Calibration	-
327	3.6221	8057.26	8040.83	0	?	0	525	Calibration	-
328	3.6331	8057.31	8045.2	0	?	0	525	Calibration	-
329	3.6441	8079.94	8054.39	0	?	0	525	Calibration	-
330	3.6552	8032.82	8048.68	0	?	0	525	Calibration	-
331	3.6662	8022.68	8041.8	0	?	0	525	Calibration	-
332	3.6773	8046.39	8043.01	0	?	0	525	Calibration	-
333	3.6883	8084.5	8053.99	0	?	0	525	Calibration	-
334	3.6994	8034.33	8048.79	0	?	0	525	Calibration	-
335	3.7104	8019.67	8041.08	0	?	0	525	Calibration	-
336	3.7214	8040.34	8040.89	0	?	0	525	Calibration	-
337	3.7325	8009.69	8032.63	0	?	0	525	Calibration	-
338	3.7435	8006.11	8025.61	0	?	0	525	Calibration	-
339	3.7546	8039.52	8029.29	0	?	0	525	Calibration	-
340	3.7656	8054.16	8035.87	0	?	0	525	Calibration	-
341	3.7767	8022.59	8032.36	0	?	0	525	Calibration	-
342	3.7877	8084.92	8046.27	0	?	0	525	Calibration	-
343	3.7987	8049.89	8047.23	0	?	0	525	Calibration	-
344	3.8098	8049.97	8047.95	0	?	0	525	Calibration	-
345	3.8208	8031.57	8043.62	0	?	0	525	Calibration	-
346	3.8319	8042.34	8043.28	0	?	0	525	Calibration	-
347	3.8429	8017.88	8036.56	0	?	0	525	Calibration	-
348	3.854	7999.73	8026.81	0	?	0	525	Calibration	-
349	3.865	8061.71	8036.05	0	?	0	525	Calibration	-
350	3.876	8037.95	8036.55	0	?	0	525	Calibration	-
351	3.8871	8028.9	8034.52	0	?	0	525	Calibration	-
352	3.8981	8012.77	8028.77	0	?	0	525	Calibration	-
353	3.9092	8034.98	8030.41	0	?	0	525	Calibration	-
354	3.9202	8013.98	8026.06	0	?	0	525	Calibration	-
355	3.9313	8022.32	8025.07	0	?	0	525	Calibration	-
356	3.9423	8023.39	8024.63	0	?	0	525	Calibration	-
357	3.9533	7999.57	8017.99	0	?	0	525	Calibration	-
358	3.9644	8040.59	8023.98	0	?	0	525	Calibration	-
359	3.9754	8009.27	8020.08	0	?	0	525	Calibration	-
360	3.9865	7964.9	8005.47	0	?	0	525	Calibration	-
361	3.9975	7973.73	7997.07	0	?	0	525	Calibration	-
362	4.0086	7999.07	7997.6	0	?	0	525	Calibration	-
363	4.0196	7986.81	7994.75	0	?	0	525	Calibration	-
364	4.0306	8016.95	8000.62	0	?	0	525	Calibration	-
365	4.0417	7984.17	7996.27	0	?	0	525	Calibration	-
366	4.0527	7979.7	7991.88	0	?	0	525	Calibration	-
367	4.0638	7968.03	7985.57	0	?	0	525	Calibration	-
368	4.0748	7998.86	7989.09	0	?	0	525	Calibration	-
369	4.0859	7988.49	7988.93	0	?	0	525	Calibration	-
370	4.0969	7991.38	7989.58	0	?	0	525	Calibration	-
371	4.1079	8011.06	7995.26	0	?	0	525	Calibration	-
372	4.119	8000.8	7996.73	0	?	0	525	Calibration	-
373	4.13	8006.07	7999.2	0	?	0	525	Calibration	-
374	4.1411	7976.93	7993.31	0	?	0	525	Calibration	-
375	4.1521	7998.19	7994.6	0	?	0	525	Calibration	-
376	4.1632	8013.42	7999.58	0	?	0	525	Calibration	-
377	4.1742	7959.7	7989.02	0	?	0	525	Calibration	-
378	4.1852	7984.74	7987.89	0	?	0	525	Calibration	-
379	4.1963	7986.11	7987.42	0	?	0	525	Calibration	-
380	4.2073	7934.5	7973.41	0	?	0	525	Calibration	-
381	4.2184	7939.15	7964.34	0	?	0	525	Calibration	-
382	4.2294	7932.27	7955.85	0	?	0	525	Calibration	-
383	4.2405	7921.18	7946.67	0	?	0	525	Calibration	-
384	4.2515	7912.07	7937.51	0	?	0	525	Calibration	-
385	4.2625	7912.36	7930.86	0	?	0	525	Calibration	-
386	4.2736	7975.58	7942.7	0	?	0	525	Calibration	-
387	4.2846	8021.85	7963.65	0	?	0	525	Calibration	-
388	4.2957	7997.99	7972.74	0	?	0	525	Calibration	-
389	4.3067	7985.71	7976.17	0	?	0	525	Calibration	-
390	4.3178	7977.06	7976.41	0	?	0	525	Calibration	-
391	4.3288	7944.06	7967.85	0	?	0	525	Calibration	-
392	4.3398	7916.8	7954.33	0	?	0	525	Calibration	-
393	4.3509	7943.9	7951.57	0	?	0	525	Calibration	-
394	4.3619	7971.59	7956.87	0	?	0	525	Calibration	-
395	4.373	7954.95	7956.36	0	?	0	525	Calibration	-
396	4.384	7978.97	7962.35	0	?	0	525	Calibration	-
397	4.3951	7940.04	7956.44	0	?	0	525	Calibration	-
398	4.4061	7941.01	7952.36	0	?	0	525	Calibration	-
399	4.4171	7900.26	7938.57	0	?	0	525	Calibration	-
400	4.4282	7898.71	7928.02	0	?	0	525	Calibration	-
401	4.4392	7954.39	7935	0	?	0	525	Calibration	-
402	4.4503	7923.03	7931.83	0	?	0	525	Calibration	-
403	4.4613	7910.07	7926.07	0	?	0	525	Calibration	-
404	4.4724	7907.66	7921.2	0	?	0	525	Calibration	-
405	4.4834	7934.84	7924.81	0	?	0	525	Calibration	-
406	4.4944	7958	7933.59	0	?	0	525	Calibration	-
407	4.5055	7933.01	7933.44	0	?	0	525	Calibration	-
408	4.5165	7980.49	7945.89	0	?	0	525	Calibration	-
409	4.5276	7972.36	7952.9	0	?	0	525	Calibration	-
410	4.5386	7987.62	7962.09	0	?	0	525	Calibration	-
411	4.5497	7981.68	7967.28	0	?	0	525	Calibration	-
412	4.5607	7925.27	7956.16	0	?	0	525	Calibration	-
413	4.5717	7913.1	7944.76	0	?	0	525	Calibration	-
414	4.5828	7923.45	7939.12	0	?	0	525	Calibration	-
415	4.5938	7958.48	7944.24	0	?	0	525	Calibration	-
416	4.6049	7946.58	7944.86	0	?	0	525	Calibration	-
417	4.6159	7990.62	7956.98	0	?	0	525	Calibration	-
418	4.627	7978.9	7962.78	0	?	0	525	Calibration	-
419	4.638	7947.33	7958.69	0	?	0	525	Calibration	-
420	4.649	7932.79	7951.83	0	?	0	525	Calibration	-
421	4.6601	7934.55	7947.26	0	?	0	525	Calibration	-
422	4.6711	7939.41	7945.18	0	?	0	525	Calibration	-
423	4.6822	8020.57	7965.14	0	?	0	525	Calibration	-
424	4.6932	7932.14	7956.4	0	?	0	525	Calibration	-
425	4.7043	7908.23	7943.65	0	?	0	525	Calibration	-
426	4.7153	7881.07	7927.09	0	?	0	525	Calibration	-
427	4.7263	7897.08	7919.14	0	?	0	525	Calibration	-
428	4.7374	7918.07	7918.86	0	?	0	525	Calibration	-
429	4.7484	7923.19	7920.01	0	?	0	525	Calibration	-
430	4.7595	7869.09	7906.53	0	?	0	525	Calibration	-
431	4.7705	7881.74	7899.97	0	?	0	525	Calibration	-
432	4.7816	7884.31	7895.82	0	?	0	525	Calibration	-
433	4.7926	7883.56	7892.58	0	?	0	525	Calibration	-
434	4.8036	7888.54	7891.51	0	?	0	525	Calibration	-
435	4.8147	7943.79	7905.35	0	?	0	525	Calibration	-
436	4.8257	7978.21	7924.64	0	?	0	525	Calibration	-
437	4.8368	8012.05	7947.77	0	?	0	525	Calibration	-
438	4.8478	7978.47	7955.9	0	?	0	525	Calibration	-
439	4.8589	7982.38	7962.91	0	?	0	525	Calibration	-
440	4.8699	7992.77	7970.81	0	?	0	525	Calibration	-
441	4.8809	7977.04	7972.46	0	?	0	525	Calibration	-
442	4.892	7932.66	7961.92	0	?	0	525	Calibration	-
443	4.903	7918.09	7950.32	0	?	0	525	Calibration	-
444	4.9141	7891.71	7934.81	0	?	0	525	Calibration	-
445	4.9251	7898.29	7925.14	0	?	0	525	Calibration	-
446	4.9362	7889.72	7915.76	0	?	0	525	Calibration	-
447	4.9472	7935.73	7921.05	0	?	0	525	Calibration	-
448	4.9582	7933.6	7924.37	0	?	0	525	Calibration	-
449	4.9693	7904.15	7919.02	0	?	0	525	Calibration	-
450	4.9803	7871.94	7906.56	0	?	0	525	Calibration	-
451	4.9914	7872.39	7897.51	0	?	0	525	Calibration	-
452	5.0024	7924.36	7904.62	0	?	0	525	Calibration	-
453	5.0135	7872.75	7896.18	0	?	0	525	Calibration	-
454	5.0245	7871.17	7889.56	0	?	0	525	Calibration	-
455	5.0355	7879.41	7886.87	0	?	0	525	Calibration	-
456	5.0466	7856.75	7878.9	0	?	0	525	Calibration	-
457	5.0576	7887.49	7881.17	0	?	0	525	Calibration	-
458	5.0687	7882.19	7881.44	0	?	0	525	Calibration	-
459	5.0797	7933.66	7895.26	0	?	0	525	Calibration	-
460	5.0908	7935.74	7905.98	0	?	0	525	Calibration	-
461	5.1018	7915.03	7908.37	0	?	0	525	Calibration	-
462	5.1128	7895.85	7905.06	0	?	0	525	Calibration	-
463	5.1239	7906.51	7905.44	0	?	0	525	Calibration	-
464	5.1349	7916.39	7908.34	0	?	0	525	Calibration	-
465	5.146	7923.31	7912.3	0	?	0	525	Calibration	-
466	5.157	7857.19	7897.71	0	?	0	525	Calibration	-
467	5.1681	7914.78	7902.23	0	?	0	525	Calibration	-
468	5.1791	7885.55	7897.82	0	?	0	525	Calibration	-
469	5.1901	7890.2	7895.8	0	?	0	525	Calibration	-
470	5.2012	7915.56	7901.03	0	?	0	525	Calibration	-
471	5.2122	7896.7	7899.88	0	?	0	525	Calibration	-
472	5.2233	7872.05	7892.52	0	?	0	525	Calibration	-
473	5.2343	7860.35	7884	0	?	0	525	Calibration	-
474	5.2454	7863.99	7878.71	0	?	0	525	Calibration	-
475	5.2564	7859.26	7873.56	0	?	0	525	Calibration	-
476	5.2674	7860.26	7870.04	0	?	0	525	Calibration	-
477	5.2785	7907.12	7879.86	0	?	0	525	Calibration	-
478	5.2895	7886.01	7881.48	0	?	0	525	Calibration	-
479	5.3006	7910.01	7889.04	0	?	0	525	Calibration	-
480	5.3116	7889.7	7889.21	0	?	0	525	Calibration	-
481	5.3227	7920.31	7897.44	0	?	0	525	Calibration	-
482	5.3337	7885.79	7894.36	0	?	0	525	Calibration	-
483	5.3447	7903.29	7896.72	0	?	0	525	Calibration	-
484	5.3558	7957.9	7912.92	0	?	0	525	Calibration	-
485	5.3668	7918	7914.26	0	?	0	525	Calibration	-
486	5.3779	7927.93	7917.88	0	?	0	525	Calibration	-
487	5.3889	7952.34	7927	0	?	0	525	Calibration	-
488	5.4	7876.96	7913.76	0	?	0	525	Calibration	-
489	5.411	7858.25	7899.06	0	?	0	525	Calibration	-
490	5.422	7883.79	7895.02	0	?	0	525	Calibration	-
491	5.4331	7942.86	7907.69	0	?	0	525	Calibration	-
492	5.4441	7886.52	7902.08	0	?	0	525	Calibration	-
493	5.4552	7919.52	7906.7	0	?	0	525	Calibration	-
494	5.4662	7914.79	7908.84	0	?	0	525	Calibration	-
495	5.4773	7949.71	7919.66	0	?	0	525	Calibration	-
496	5.4883	7919.84	7919.71	0	?	0	525	Calibration	-
497	5.4993	7903.17	7915.33	0	?	0	525	Calibration	-
498	5.5104	7883.25	7906.84	0	?	0	525	Calibration	-
499	5.5214	7921.52	7910.72	0	?	0	525	Calibration	-
500	5.5325	7851.16	7894.96	0	?	0	525	Calibration	-
501	5.5435	7831.18	7878.07	0	?	0	525	Calibration	-
502	5.5546	7851.51	7871.04	0	?	0	525	Calibration	-
503	5.5656	7853.99	7866.53	0	?	0	525	Calibration	-
504	5.5766	7883.85	7871.11	0	?	0	525	Calibration	-
505	5.5877	7902.85	7879.52	0	?	0	525	Calibration	-
506	5.5987	7851.23	7872.03	0	?	0	525	Calibration	-
507	5.6098	7838.67	7863.2	0	?	0	525	Calibration	-
508	5.6208	7834.92	7855.71	0	?	0	525	Calibration	-
509	5.6319	7840.41	7851.66	0	?	0	525	Calibration	-
510	5.6429	7834.32	7847.07	0	?	0	525	Calibration	-
511	5.6539	7825.61	7841.39	0	?	0	525	Calibration	-
512	5.665	7900.9	7857.14	0	?	0	525	Calibration	-
513	5.676	7903.14	7869.32	0	?	0	525	Calibration	-
514	5.6871	7880.48	7872.27	0	?	0	525	Calibration	-
515	5.6981	7809.04	7855.53	0	?	0	525	Calibration	-
516	5.7092	7833.76	7849.77	0	?	0	525	Calibration	-
517	5.7202	7832.65	7845.24	0	?	0	525	Calibration	-
518	5.7312	7883.51	7855.37	0	?	0	525	Calibration	-
519	5.7423	7927.27	7874.4	0	?	0	525	Calibration	-
520	5.7533	7881.82	7876.37	0	?	0	525	Calibration	-
521	5.7644	7856.24	7871.04	0	?	0	525	Calibration	-
522	5.7754	7841.76	7863.29	0	?	0	525	Calibration	-
523	5.7865	7830.33	7854.56	0	?	0	525	Calibration	-
524	5.7975	7894.07	7865.02	0	?	0	525	Calibration	-
525	5.8085	7841.75	7858.86	0	?	0	525	Calibration	-
526	5.8196	7835.95	7852.8	0	?	0	525	Calibration	-
527	5.8306	7844.7	7850.65	0	?	0	525	Calibration	-
528	5.8417	7870.74	7855.97	0	?	0	525	Calibration	-
529	5.8527	7806.76	7842.94	0	?	0	525	Calibration	-
530	5.8638	7813.18	7835.06	0	?	0	525	Calibration	-
531	5.8748	7847.77	7838.43	0	?	0	525	Calibration	-
532	5.8858	7827.38	7835.5	0	?	0	525	Calibration	-
533	5.8969	7804.04	7827.17	0	?	0	525	Calibration	-
534	5.9079	7802.24	7820.57	0	?	0	525	Calibration	-
535	5.919	7842.1	7826.27	0	?	0	525	Calibration	-
536	5.93	7909.65	7848.34	0	?	0	525	Calibration	-
537	5.9411	7872.7	7854.79	0	?	0	525	Calibration	-
538	5.9521	7854.57	7854.73	0	?	0	525	Calibration	-
539	5.9631	7847.62	7852.85	0	?	0	525	Calibration	-
540	5.9742	7906.09	7866.94	0	?	0	525	Calibration	-
541	5.9852	7867.19	7867.01	0	?	0	525	Calibration	-
542	5.9963	7857.67	7864.54	0	?	0	525	Calibration	-
543	6.0073	7875.97	7867.56	0	?	0	525	Calibration	-
544	6.0184	7839.76	7860.2	0	?	0	525	Calibration	-
545	6.0294	7834.32	7853.35	0	?	0	525	Calibration	-
546	6.0404	7837.99	7849.29	0	?	0	525	Calibration	-
547	6.0515	7824.1	7842.62	0	?	0	525	Calibration	-
548	6.0625	7845.45	7843.37	0	?	0	525	Calibration	-
549	6.0736	7789.03	7828.99	0	?	0	525	Calibration	-
550	6.0846	7789.05	7818.41	0	?	0	525	Calibration	-
551	6.0957	7794.52	7812.09	0	?	0	525	Calibration	-
552	6.1067	7847.12	7821.36	0	?	0	525	Calibration	-
553	6.1177	7833.69	7824.63	0	?	0	525	Calibration	-
554	6.1288	7832.8	7826.79	0	?	0	525	Calibration	-
555	6.1398	7854.41	7834.1	0	?	0	525	Calibration	-
556	6.1509	7844.4	7836.83	0	?	0	525	Calibration	-
557	6.1619	7810.21	7829.78	0	?	0	525	Calibration	-
558	6.173	7781.93	7817.11	0	?	0	525	Calibration	-
559	6.184	7777.72	7806.69	0	?	0	525	Calibration	-
560	6.195	7748.71	7791.34	0	?	0	525	Calibration	-
561	6.2061	7785.08	7789.68	0	?	0	525	Calibration	-
562	6.2171	7855.43	7807.09	0	?	0	525	Calibration	-
563	6.2282	7861.38	7821.46	0	?	0	525	Calibration	-
564	6.2392	7818.73	7820.73	0	?	0	525	Calibration	-
565	6.2503	7818.55	7820.16	0	?	0	525	Calibration	-
566	6.2613	7895.49	7840.1	0	?	0	525	Calibration	-
567	6.2723	7881.59	7851.08	0	?	0	525	Calibration	-
568	6.2834	7859.2	7853.23	0	?	0	525	Calibration	-
569	6.2944	7838.48	7849.33	0	?	0	525	Calibration	-
570	6.3055	7768.06	7827.81	0	?	0	525	Calibration	-
571	6.3165	7779.01	7814.9	0	?	0	525	Calibration	-
572	6.3276	7825.1	7817.6	0	?	0	525	Calibration	-
573	6.3386	7773.99	7806.05	0	?	0	525	Calibration	-
574	6.3496	7797.44	7803.77	0	?	0	525	Calibration	-
575	6.3607	7790.02	7800.13	0	?	0	525	Calibration	-
576	6.3717	7771.48	7792.55	0	?	0	525	Calibration	-
577	6.3828	7786.31	7790.9	0	?	0	525	Calibration	-
578	6.3938	7785.33	7789.42	0	?	0	525	Calibration	-
579	6.4049	7791.42	7789.95	0	?	0	525	Calibration	-
580	6.4159	7836.55	7802.29	0	?	0	525	Calibration	-
581	6.4269	7815.38	7805.75	0	?	0	525	Calibration	-
582	6.438	7804.07	7805.31	0	?	0	525	Calibration	-
583	6.449	7791.06	7801.54	0	?	0	525	Calibration	-
584	6.4601	7780.41	7795.94	0	?	0	525	Calibration	-
585	6.4711	7784.9	7793.02	0	?	0	525	Calibration	-
586	6.4822	7799.21	7794.66	0	?	0	525	Calibration	-
587	6.4932	7759.1	7785.25	0	?	0	525	Calibration	-
588	6.5042	7776.99	7783.06	0	?	0	525	Calibration	-
589	6.5153	7756.8	7776.11	0	?	0	525	Calibration	-
590	6.5263	7803.95	7783.48	0	?	0	525	Calibration	-
591	6.5374	7729.78	7769.26	0	?	0	525	Calibration	-
592	6.5484	7799.81	7777.35	0	?	0	525	Calibration	-
593	6.5595	7798.29	7782.89	0	?	0	525	Calibration	-
594	6.5705	7816.14	7791.69	0	?	0	525	Calibration	-
595	6.5815	7824.29	7800.32	0	?	0	525	Calibration	-
596	6.5926	7791	7797.85	0	?	0	525	Calibration	-
597	6.6036	7781.02	7793.4	0	?	0	525	Calibration	-
598	6.6147	7806.26	7796.8	0	?	0	525	Calibration	-
599	6.6257	7789.86	7794.97	0	?	0	525	Calibration	-
600	6.6368	7785.55	7792.47	0	?	0	525	Calibration	-
601	6.6478	7750.52	7781.37	0	?	0	525	Calibration	-
602	6.6588	7779.68	7780.92	0	?	0	525	Calibration	-
603	6.6699	7756.74	7774.52	0	?	0	525	Calibration	-
604	6.6809	7764.76	7771.94	0	?	0	525	Calibration	-
605	6.692	7784.76	7775.33	0	?	0	525	Calibration	-
606	6.703	7747.43	7767.94	0	?	0	525	Calibration	-
607	6.7141	7776.54	7770.22	0	?	0	525	Calibration	-
608	6.7251	7724.24	7758.05	0	?	0	525	Calibration	-
609	6.7361	7707.39	7744.64	0	?	0	525	Calibration	-
610	6.7472	7715.46	7736.91	0	?	0	525	Calibration	-
611	6.7582	7727.55	7734.44	0	?	0	525	Calibration	-
612	6.7693	7801.02	7752.06	0	?	0	525	Calibration	-
613	6.7803	7779.46	7759.31	0	?	0	525	Calibration	-
614	6.7914	7715.82	7747.8	0	?	0	525	Calibration	-
615	6.8024	7757.29	7750.31	0	?	0	525	Calibration	-
616	6.8134	7765.34	7754.29	0	?	0	525	Calibration	-
617	6.8245	7757.23	7755.07	0	?	0	525	Calibration	-
618	6.8355	7736.97	7750.28	0	?	0	525	Calibration	-
619	6.8466	7777.62	7757.52	0	?	0	525	Calibration	-
620	6.8576	7783.78	7764.47	0	?	0	525	Calibration	-
621	6.8687	7784.24	7769.7	0	?	0	525	Calibration	-
622	6.8797	7800.97	7777.98	0	?	0	525	Calibration	-
623	6.8907	7790.89	7781.4	0	?	0	525	Calibration	-
624	6.9018	7776.21	7780.02	0	?	0	525	Calibration	-
625	6.9128	7766.28	7776.38	0	?	0	525	Calibration	-
626	6.9239	7727.31	7763.4	0	?	0	525	Calibration	-
627	6.9349	7767.81	7764.56	0	?	0	525	Calibration	-
628	6.946	7777.79	7768.07	0	?	0	525	Calibration	-
629	6.957	7780.27	7771.3	0	?	0	525	Calibration	-
630	6.968	7746.92	7764.84	0	?	0	525	Calibration	-
631	6.9791	7818.36	7779.01	0	?	0	525	Calibration	-
632	6.9901	7810.93	7787.46	0	?	0	525	Calibration	-
633	7.0012	7783.21	7786.33	0	?	0	525	Calibration	-
634	7.0122	7802.5	7790.61	0	?	0	525	Calibration	-
635	7.0233	7792.25	7791.05	0	?	0	525	Calibration	-
636	7.0343	7797.67	7792.8	0	?	0	525	Calibration	-
637	7.0453	7782.67	7790.12	0	?	0	525	Calibration	-
638	7.0564	7792.65	7790.79	0	?	0	525	Calibration	-
639	7.0674	7812.96	7796.66	0	?	0	525	Calibration	-
640	7.0785	7783.26	7793.11	0	?	0	525	Calibration	-
641	7.0895	7743.46	7779.97	0	?	0	525	Calibration	-
642	7.1006	7791.71	7783.07	0	?	0	525	Calibration	-
643	7.1116	7769.45	7779.47	0	?	0	525	Calibration	-
644	7.1226	7791.03	7782.53	0	?	0	525	Calibration	-
645	7.1337	7762.55	7777.24	0	?	0	525	Calibration	-
646	7.1447	7720.09	7762.11	0	?	0	525	Calibration	-
647	7.1558	7726.07	7752.57	0	?	0	525	Calibration	-
648	7.1668	7710.93	7741.55	0	?	0	525	Calibration	-
649	7.1779	7756.48	7745.5	0	?	0	525	Calibration	-
650	7.1889	7691.28	7731.15	0	?	0	525	Calibration	-
651	7.1999	7682.91	7718.38	0	?	0	525	Calibration	-
652	7.211	7666.68	7704.69	0	?	0	525	Calibration	-
653	7.222	7696.98	7702.65	0	?	0	525	Calibration	-
654	7.2331	7682.66	7697.36	0	?	0	525	Calibration	-
655	7.2441	7666.33	7689.15	0	?	0	525	Calibration	-
656	7.2552	7713.78	7695.67	0	?	0	525	Calibration	-
657	7.2662	7754.93	7711.35	0	?	0	525	Calibration	-
658	7.2772	7697.21	7707.61	0	?	0	525	Calibration	-
659	7.2883	7681.99	7700.83	0	?	0	525	Calibration	-
660	7.2993	7707.93	7702.71	0	?	0	525	Calibration	-
661	7.3104	7693.52	7700.28	0	?	0	525	Calibration	-
662	7.3214	7644.07	7685.4	0	?	0	525	Calibration	-
663	7.3325	7692.09	7687.17	0	?	0	525	Calibration	-
664	7.3435	7689.59	7687.81	0	?	0	525	Calibration	-
665	7.3545	7704.49	7692.23	0	?	0	525	Calibration	-
666	7.3656	7731.88	7702.72	0	?	0	525	Calibration	-
667	7.3766	7727.43	7709.26	0	?	0	525	Calibration	-
668	7.3877	7712.32	7710.07	0	?	0	525	Calibration	-
669	7.3987	7726	7714.29	0	?	0	525	Calibration	-
670	7.4098	7718.7	7715.46	0	?	0	525	Calibration	-
671	7.4208	7719.42	7716.5	0	?	0	525	Calibration	-
672	7.4318	7709.01	7714.52	0	?	0	525	Calibration	-
673	7.4429	7736.35	7720.3	0	?	0	525	Calibration	-
674	7.4539	7712.3	7718.18	0	?	0	525	Calibration	-
675	7.465	7709.98	7716.01	0	?	0	525	Calibration	-
676	7.476	7767.62	7729.67	0	?	0	525	Calibration	-
677	7.4871	7754.68	7736.29	0	?	0	525	Calibration	-
678	7.4981	7752.16	7740.49	0	?	0	525	Calibration	-
679	7.5091	7767.79	7747.72	0	?	0	525	Calibration	-
680	7.5202	7773.03	7754.42	0	?	0	525	Calibration	-
681	7.5312	7739.78	7750.54	0	?	0	525	Calibration	-
682	7.5423	7698.96	7736.89	0	?	0	525	Calibration	-
683	7.5533	7715.46	7731.22	0	?	0	525	Calibration	-
684	7.5644	7746.01	7735.13	0	?	0	525	Calibration	-
685	7.5754	7720.86	7731.36	0	?	0	525	Calibration	-
686	7.5864	7674.8	7716.39	0	?	0	525	Calibration	-
687	7.5975	7680.34	7706.85	0	?	0	525	Calibration	-
688	7.6085	7680.72	7699.93	0	?	0	525	Calibration	-
689	7.6196	7661.29	7689.7	0	?	0	525	Calibration	-
690	7.6306	7656.97	7681.04	0	?	0	525	Calibration	-
691	7.6417	7653.59	7673.77	0	?	0	525	Calibration	-
692	7.6527	7675.74	7674.29	0	?	0	525	Calibration	-
693	7.6637	7709.04	7683.49	0	?	0	525	Calibration	-
694	7.6748	7698.73	7687.52	0	?	0	525	Calibration	-
695	7.6858	7669.48	7682.75	0	?	0	525	Calibration	-
696	7.6969	7675.07	7680.72	0	?	0	525	Calibration	-
697	7.7079	7679.47	7680.39	0	?	0	525	Calibration	-
698	7.719	7655.6	7673.83	0	?	0	525	Calibration	-
699	7.73	7710.71	7683.59	0	?	0	525	Calibration	-
700	7.741	7697.09	7687.16	0	?	0	525	Calibration	-
701	7.7521	7638.82	7674.37	0	?	0	525	Calibration	-
702	7.7631	7667.29	7672.49	0	?	0	525	Calibration	-
703	7.7742	7675.19	7673.21	0	?	0	525	Calibration	-
704	7.7852	7677	7674.21	0	?	0	525	Calibration	-
705	7.7963	7675.49	7674.55	0	?	0	525	Calibration	-
706	7.8073	7721.47	7686.97	0	?	0	525	Calibration	-
707	7.8183	7709.9	7693.04	0	?	0	525	Calibration	-
708	7.8294	7693.82	7693.25	0	?	0	525	Calibration	-
709	7.8404	7652.72	7682.52	0	?	0	525	Calibration	-
710	7.8515	7674.42	7680.37	0	?	0	525	Calibration	-
711	7.8625	7708.26	7687.76	0	?	0	525	Calibration	-
712	7.8736	7708.05	7693.13	0	?	0	525	Calibration	-
713	7.8846	7694.77	7693.56	0	?	0	525	Calibration	-
714	7.8956	7722.77	7701.29	0	?	0	525	Calibration	-
715	7.9067	7752.16	7714.76	0	?	0	525	Calibration	-
716	7.9177	7727.52	7718.14	0	?	0	525	Calibration	-
717	7.9288	7733.78	7722.28	0	?	0	525	Calibration	-
718	7.9398	7682.11	7711.65	0	?	0	525	Calibration	-
719	7.9509	7683.52	7704.2	0	?	0	525	Calibration	-
720	7.9619	7651.42	7690.23	0	?	0	525	Calibration	-
721	7.9729	7633.8	7675.29	0	?	0	525	Calibration	-
722	7.984	7665.42	7672.68	0	?	0	525	Calibration	-
723	7.995	7628.42	7660.96	0	?	0	525	Calibration	-
724	8.0061	7636.79	7654.56	0	?	0	525	Calibration	-
725	8.0171	7616.11	7644.39	0	?	0	525	Calibration	-
726	8.0282	7658.18	7648.04	0	?	0	525	Calibration	-
727	8.0392	7674.31	7654.99	0	?	0	525	Calibration	-
728	8.0502	7646.65	7652.78	0	?	0	525	Calibration	-
729	8.0613	7642.4	7650.03	0	?	0	525	Calibration	-
730	8.0723	7637.83	7646.8	0	?	0	525	Calibration	-
731	8.0834	7602.04	7634.96	0	?	0	525	Calibration	-
732	8.0944	7588.99	7622.79	0	?	0	525	Calibration	-
733	8.1055	7618.45	7621.64	0	?	0	525	Calibration	-
734	8.1165	7642.09	7627.05	0	?	0	525	Calibration	-
735	8.1275	7634.99	7629.15	0	?	0	525	Calibration	-
736	8.1386	7612.6	7624.77	0	?	0	525	Calibration	-
737	8.1496	7642.76	7629.53	0	?	0	525	Calibration	-
738	8.1607	7629.45	7629.51	0	?	0	525	Calibration	-
739	8.1717	7655.48	7636.39	0	?	0	525	Calibration	-
740	8.1828	7595.96	7625.68	0	?	0	525	Calibration	-
741	8.1938	7619.76	7624.12	0	?	0	525	Calibration	-
742	8.2048	7618.56	7622.65	0	?	0	525	Calibration	-
743	8.2159	7660.74	7632.73	0	?	0	525	Calibration	-
744	8.2269	7668.94	7642.31	0	?	0	525	Calibration	-
745	8.238	7658.67	7646.64	0	?	0	525	Calibration	-
746	8.249	7692.31	7658.73	0	?	0	525	Calibration	-
747	8.2601	7693.47	7667.93	0	?	0	525	Calibration	-
748	8.2711	7706.6	7678.16	0	?	0	525	Calibration	-
749	8.2821	7711.03	7686.86	0	?	0	525	Calibration	-
750	8.2932	7734.34	7699.43	0	?	0	525	Calibration	-
751	8.3042	7728.85	7707.22	0	?	0	525	Calibration	-
752	8.3153	7711.64	7708.39	0	?	0	525	Calibration	-
753	8.3263	7697.44	7705.49	0	?	0	525	Calibration	-
754	8.3374	7644.62	7689.38	0	?	0	525	Calibration	-
755	8.3484	7614.22	7669.48	0	?	0	525	Calibration	-
756	8.3594	7607.98	7653.2	0	?	0	525	Calibration	-
757	8.3705	7600.62	7639.29	0	?	0	525	Calibration	-
758	8.3815	7618.91	7633.89	0	?	0	525	Calibration	-
759	8.3926	7589.32	7622.09	0	?	0	525	Calibration	-
760	8.4036	7652.52	7630.15	0	?	0	525	Calibration	-
761	8.4147	7673.68	7641.67	0	?	0	525	Calibration	-
762	8.4257	7636.1	7640.2	0	?	0	525	Calibration	-
763	8.4367	7654.5	7643.98	0	?	0	525	Calibration	-
764	8.4478	7627.02	7639.49	0	?	0	525	Calibration	-
765	8.4588	7593.75	7627.38	0	?	0	525	Calibration	-
766	8.4699	7624.12	7626.52	0	?	0	525	Calibration	-
767	8.4809	7619.47	7624.65	0	?	0	525	Calibration	-
768	8.492	7611.92	7621.28	0	?	0	525	Calibration	-
769	8.503	7636.15	7625.22	0	?	0	525	Calibration	-
770	8.514	7625.02	7625.17	0	?	0	525	Calibration	-
771	8.5251	7648.45	7631.33	0	?	0	525	Calibration	-
772	8.5361	7654.51	7637.46	0	?	0	525	Calibration	-
773	8.5472	7645.75	7639.66	0	?	0	525	Calibration	-
774	8.5582	7656.03	7643.99	0	?	0	525	Calibration	-
775	8.5693	7661.41	7648.6	0	?	0	525	Calibration	-
776	8.5803	7625.08	7642.38	0	?	0	525	Calibration	-
777	8.5913	7642.35	7642.37	0	?	0	525	Calibration	-
778	8.6024	7625.43	7637.89	0	?	0	525	Calibration	-
779	8.6134	7626.91	7634.98	0	?	0	525	Calibration	-
780	8.6245	7625.84	7632.56	0	?	0	525	Calibration	-
781	8.6355	7598.23	7623.47	0	?	0	525	Calibration	-
782	8.6466	7590.77	7614.82	0	?	0	525	Calibration	-
783	8.6576	7581.79	7606.07	0	?	0	525	Calibration	-
784	8.6686	7574.03	7597.59	0	?	0	525	Calibration	-
785	8.6797	7578.92	7592.65	0	?	0	525	Calibration	-
786	8.6907	7624.52	7601.09	0	?	0	525	Calibration	-
787	8.7018	7617.53	7605.44	0	?	0	525	Calibration	-
788	8.7128	7591.32	7601.7	0	?	0	525	Calibration	-
789	8.7239	7617.31	7605.83	0	?	0	525	Calibration	-
790	8.7349	7625.76	7611.11	0	?	0	525	Calibration	-
791	8.7459	7576.07	7601.83	0	?	0	525	Calibration	-
792	8.757	7587.24	7597.97	0	?	0	525	Calibration	-
793	8.768	7619.7	7603.72	0	?	0	525	Calibration	-
794	8.7791	7638.53	7612.94	0	?	0	525	Calibration	-
795	8.7901	7615.64	7613.65	0	?	0	525	Calibration	-
796	8.8012	7599.76	7609.97	0	?	0	525	Calibration	-
797	8.8122	7609.59	7609.87	0	?	0	525	Calibration	-
798	8.8232	7621.44	7612.93	0	?	0	525	Calibration	-
799	8.8343	7585.43	7605.65	0	?	0	525	Calibration	-
800	8.8453	7570.4	7596.32	0	?	0	525	Calibration	-
801	8.8564	7588.78	7594.32	0	?	0	525	Calibration	-
802	8.8674	7607.43	7597.79	0	?	0	525	Calibration	-
803	8.8785	7564.9	7589.08	0	?	0	525	Calibration	-
804	8.8895	7555.86	7580.29	0	?	0	525	Calibration	-
805	8.9005	7566.76	7576.71	0	?	0	525	Calibration	-
806	8.9116	7605.24	7584.26	0	?	0	525	Calibration	-
807	8.9226	7648.11	7601.16	0	?	0	525	Calibration	-
808	8.9337	7632.41	7609.43	0	?	0	525	Calibration	-
809	8.9447	7632.67	7615.58	0	?	0	525	Calibration	-
810	8.9558	7645.05	7623.38	0	?	0	525	Calibration	-
811	8.9668	7645.85	7629.33	0	?	0	525	Calibration	-
812	8.9778	7679.7	7642.66	0	?	0	525	Calibration	-
813	8.9889	7634.53	7640.51	0	?	0	525	Calibration	-
814	8.9999	7612.98	7633.22	0	?	0	525	Calibration	-
815	9.011	7623.18	7630.56	0	?	0	525	Calibration	-
816	9.022	7633.64	7631.38	0	?	0	525	Calibration	-
817	9.0331	7604.72	7624.32	0	?	0	525	Calibration	-
818	9.0441	7576.83	7611.75	0	?	0	525	Calibration	-
819	9.0551	7578.83	7603.04	0	?	0	525	Calibration	-
820	9.0662	7604.45	7603.41	0	?	0	525	Calibration	-
821	9.0772	7580.55	7597.36	0	?	0	525	Calibration	-
822	9.0883	7591.59	7595.83	0	?	0	525	Calibration	-
823	9.0993	7585.6	7593.13	0	?	0	525	Calibration	-
824	9.1104	7597.16	7594.19	0	?	0	525	Calibration	-
825	9.1214	7591.75	7593.55	0	?	0	525	Calibration	-
826	9.1324	7584.43	7591.13	0	?	0	525	Calibration	-
827	9.1435	7629.21	7601.21	0	?	0	525	Calibration	-
828	9.1545	7608.73	7603.2	0	?	0	525	Calibration	-
829	9.1656	7581.47	7597.45	0	?	0	525	Calibration	-
830	9.1766	7574.4	7591.35	0	?	0	525	Calibration	-
831	9.1877	7593.75	7591.98	0	?	0	525	Calibration	-
832	9.1987	7573.7	7587.14	0	?	0	525	Calibration	-
833	9.2097	7591.08	7588.19	0	?	0	525	Calibration	-
834	9.2208	7568.17	7582.89	0	?	0	525	Calibration	-
835	9.2318	7574.02	7580.54	0	?	0	525	Calibration	-
836	9.2429	7594.28	7584.18	0	?	0	525	Calibration	-
837	9.2539	7571.65	7580.86	0	?	0	525	Calibration	-
838	9.265	7590.21	7583.33	0	?	0	525	Calibration	-
839	9.276	7567.59	7579.17	0	?	0	525	Calibration	-
840	9.287	7569.49	7576.61	0	?	0	525	Calibration	-
841	9.2981	7557.19	7571.47	0	?	0	525	Calibration	-
842	9.3091	7569.83	7571.03	0	?	0	525	Calibration	-
843	9.3202	7551.6	7565.89	0	?	0	525	Calibration	-
844	9.3312	7528.79	7556.07	0	?	0	525	Calibration	-
845	9.3423	7525.11	7547.88	0	?	0	525	Calibration	-
846	9.3533	7567.58	7553.09	0	?	0	525	Calibration	-
847	9.3643	7563.19	7555.76	0	?	0	525	Calibration	-
848	9.3754	7548	7553.71	0	?	0	525	Calibration	-
849	9.3864	7543.33	7550.96	0	?	0	525	Calibration	-
850	9.3975	7522.99	7543.56	0	?	0	525	Calibration	-
851	9.4085	7539.16	7542.39	0	?	0	525	Calibration	-
852	9.4196	7572.46	7550.35	0	?	0	525	Calibration	-
853	9.4306	7595.93	7562.42	0	?	0	525	Calibration	-
854	9.4416	7600.59	7572.52	0	?	0	525	Calibration	-
855	9.4527	7548.12	7566.06	0	?	0	525	Calibration	-
856	9.4637	7526.82	7555.68	0	?	0	525	Calibration	-
857	9.4748	7573.94	7560.51	0	?	0	525	Calibration	-
858	9.4858	7599.76	7570.9	0	?	0	525	Calibration	-
859	9.4969	7545.34	7564.14	0	?	0	525	Calibration	-
860	9.5079	7551.75	7560.86	0	?	0	525	Calibration	-
861	9.5189	7568.47	7562.87	0	?	0	525	Calibration	-
862	9.53	7542.41	7557.45	0	?	0	525	Calibration	-
863	9.541	7606.62	7570.47	0	?	0	525	Calibration	-
864	9.5521	7589.08	7575.4	0	?	0	525	Calibration	-
865	9.5631	7551.92	7569.18	0	?	0	525	Calibration	-
866	9.5742	7542.81	7562.2	0	?	0	525	Calibration	-
867	9.5852	7557.25	7560.89	0	?	0	525	Calibration	-
868	9.5962	7592.35	7569.22	0	?	0	525	Calibration	-
869	9.6073	7552.54	7564.8	0	?	0	525	Calibration	-
870	9.6183	7553.18	7561.73	0	?	0	525	Calibration	-
871	9.6294	7541.7	7556.43	0	?	0	525	Calibration	-
872	9.6404	7571.79	7560.49	0	?	0	525	Calibration	-
873	9.6515	7584.85	7566.94	0	?	0	525	Calibration	-
874	9.6625	7620.52	7581.12	0	?	0	525	Calibration	-
875	9.6735	7569.73	7578.11	0	?	0	525	Calibration	-
876	9.6846	7576.5	7577.68	0	?	0	525	Calibration	-
877	9.6956	7628.53	7591.14	0	?	0	525	Calibration	-
878	9.7067	7588.71	7590.5	0	?	0	525	Calibration	-
879	9.7177	7542.78	7577.87	0	?	0	525	Calibration	-
880	9.7288	7578.56	7578.05	0	?	0	525	Calibration	-
881	9.7398	7571.79	7576.39	0	?	0	525	Calibration	-
882	9.7508	7565.77	7573.58	0	?	0	525	Calibration	-
883	9.7619	7603.94	7581.62	0	?	0	525	Calibration	-
884	9.7729	7607.04	7588.35	0	?	0	525	Calibration	-
885	9.784	7615.28	7595.48	0	?	0	525	Calibration	-
886	9.795	7582.53	7592.05	0	?	0	525	Calibration	-
887	9.8061	7574	7587.27	0	?	0	525	Calibration	-
888	9.8171	7561.05	7580.33	0	?	0	525	Calibration	-
889	9.8281	7595.59	7584.37	0	?	0	525	Calibration	-
890	9.8392	7547.83	7574.7	0	?	0	525	Calibration	-
891	9.8502	7562.73	7571.53	0	?	0	525	Calibration	-
892	9.8613	7622.76	7585.09	0	?	0	525	Calibration	-
893	9.8723	7596.65	7588.15	0	?	0	525	Calibration	-
894	9.8834	7556.66	7579.81	0	?	0	525	Calibration	-
895	9.8944	7623.68	7591.42	0	?	0	525	Calibration	-
896	9.9054	7570.24	7585.82	0	?	0	525	Calibration	-
897	9.9165	7597.36	7588.87	0	?	0	525	Calibration	-
898	9.9275	7580.66	7586.7	0	?	0	525	Calibration	-
899	9.9386	7537.18	7573.59	0	?	0	525	Calibration	-
900	9.9496	7532.79	7562.79	0	?	0	525	Calibration	-
901	9.9607	7572.79	7565.44	0	?	0	525	Calibration	-
902	9.9717	7538.99	7558.44	0	?	0	525	Calibration	-
903	9.9827	7569.35	7561.33	0	?	0	525	Calibration	-
904	9.9938	7616.01	7575.8	0	?	0	525	Calibration	-
905	10.0048	7630.88	7590.38	0	?	0	525	Calibration	-
906	10.0159	7603.62	7593.89	0	?	0	525	Calibration	-
907	10.0269	7564.02	7585.98	0	?	0	525	Calibration	-
908	10.038	7553.93	7577.5	0	?	0	525	Calibration	-
909	10.049	7621.45	7589.13	0	?	0	525	Calibration	-
910	10.06	7608.34	7594.22	0	?	0	525	Calibration	-
911	10.0711	7622.36	7601.67	0	?	0	525	Calibration	-
912	10.0821	7599.51	7601.1	0	?	0	525	Calibration	-
913	10.0932	7597.18	7600.06	0	?	0	525	Calibration	-
914	10.1042	7588.46	7596.99	0	?	0	525	Calibration	-
915	10.1153	7598.96	7597.51	0	?	0	525	Calibration	-
916	10.1263	7538.35	7581.85	0	?	0	525	Calibration	-
917	10.1373	7586.56	7583.1	0	?	0	525	Calibration	-
918	10.1484	7595	7586.25	0	?	0	525	Calibration	-
919	10.1594	7600.76	7590.09	0	?	0	525	Calibration	-
920	10.1705	7575.66	7586.27	0	?	0	525	Calibration	-
921	10.1815	7610.35	7592.64	0	?	0	525	Calibration	-
922	10.1926	7614.01	7598.3	0	?	0	525	Calibration	-
923	10.2036	7607.3	7600.68	0	?	0	525	Calibration	-
924	10.2146	7599.41	7600.35	0	?	0	525	Calibration	-
925	10.2257	7588.51	7597.21	0	?	0	525	Calibration	-
926	10.2367	7597.51	7597.29	0	?	0	525	Calibration	-
927	10.2478	7556.39	7586.46	0	?	0	525	Calibration	-
928	10.2588	7614.18	7593.8	0	?	0	525	Calibration	-
929	10.2699	7592.3	7593.4	0	?	0	525	Calibration	-
930	10.2809	7605.73	7596.67	0	?	0	525	Calibration	-
931	10.2919	7654.23	7611.9	0	?	0	525	Calibration	-
932	10.303	7637.52	7618.68	0	?	0	525	Calibration	-
933	10.314	7575.88	7607.35	0	?	0	525	Calibration	-
934	10.3251	7573.34	7598.35	0	?	0	525	Calibration	-
935	10.3361	7593.41	7597.04	0	?	0	525	Calibration	-
936	10.3472	7687.19	7620.9	0	?	0	525	Calibration	-
937	10.3582	7681.04	7636.82	0	?	0	525	Calibration	-
938	10.3692	7653.92	7641.35	0	?	0	525	Calibration	-
939	10.3803	7725.51	7663.63	0	?	0	525	Calibration	-
940	10.3913	7740.84	7684.07	0	?	0	525	Calibration	-
941	10.4024	7643.01	7673.2	0	?	0	525	Calibration	-
942	10.4134	7653.47	7667.98	0	?	0	525	Calibration	-
943	10.4245	7633.47	7658.84	0	?	0	525	Calibration	-
944	10.4355	7596.31	7642.29	0	?	0	525	Calibration	-
945	10.4465	7650.27	7644.4	0	?	0	525	Calibration	-
946	10.4576	7669.06	7650.93	0	?	0	525	Calibration	-
947	10.4686	7636.97	7647.23	0	?	0	525	Calibration	-
948	10.4797	7564.04	7625.21	0	?	0	525	Calibration	-
949	10.4907	7606.82	7620.34	0	?	0	525	Calibration	-
950	10.5018	7572.18	7607.59	0	?	0	525	Calibration	-
951	10.5128	7580.57	7600.44	0	?	0	525	Calibration	-
952	10.5238	7577.57	7594.39	0	?	0	525	Calibration	-
953	10.5349	7595.02	7594.56	0	?	0	525	Calibration	-
954	10.5459	7555.21	7584.14	0	?	0	525	Calibration	-
955	10.557	7605.58	7589.82	0	?	0	525	Calibration	-
956	10.568	7571.67	7585.01	0	?	0	525	Calibration	-
957	10.5791	7569.2	7580.83	0	?	0	525	Calibration	-
958	10.5901	7558.26	7574.85	0	?	0	525	Calibration	-
959	10.6011	7576.36	7575.25	0	?	0	525	Calibration	-
960	10.6122	7591.95	7579.67	0	?	0	525	Calibration	-
961	10.6232	7546.56	7570.91	0	?	0	525	Calibration	-
962	10.6343	7544.74	7563.98	0	?	0	525	Calibration	-
963	10.6453	7579.43	7568.07	0	?	0	525	Calibration	-
964	10.6564	7512.18	7553.27	0	?	0	525	Calibration	-
965	10.6674	7550.26	7552.48	0	?	0	525	Calibration	-
966	10.6784	7578.97	7559.49	0	?	0	525	Calibration	-
967	10.6895	7601.77	7570.68	0	?	0	525	Calibration	-
968	10.7005	7622.84	7584.49	0	?	0	525	Calibration	-
969	10.7116	7609.84	7591.2	0	?	0	525	Calibration	-
970	10.7226	7557.44	7582.26	0	?	0	525	Calibration	-
971	10.7337	7561.39	7576.74	0	?	0	525	Calibration	-
972	10.7447	7559.29	7572.12	0	?	0	525	Calibration	-
973	10.7557	7573.19	7572.4	0	?	0	525	Calibration	-
974	10.7668	7522.27	7559.13	0	?	0	525	Calibration	-
975	10.7778	7596.04	7568.9	0	?	0	525	Calibration	-
976	10.7889	7615.68	7581.28	0	?	0	525	Calibration	-
977	10.7999	7584.46	7582.12	0	?	0	525	Calibration	-
978	10.811	7590.78	7584.42	0	?	0	525	Calibration	-
979	10.822	7572.16	7581.17	0	?	0	525	Calibration	-
980	10.833	7608.39	7588.37	0	?	0	525	Calibration	-
981	10.8441	7651.51	7605.09	0	?	0	525	Calibration	-
982	10.8551	7590.5	7601.23	0	?	0	525	Calibration	-
983	10.8662	7553.66	7588.63	0	?	0	525	Calibration	-
984	10.8772	7523.89	7571.49	0	?	0	525	Calibration	-
985	10.8883	7570.26	7571.17	0	?	0	525	Calibration	-
986	10.8993	7557.91	7567.66	0	?	0	525	Calibration	-
987	10.9103	7550.16	7563.02	0	?	0	525	Calibration	-
988	10.9214	7583.33	7568.4	0	?	0	525	Calibration	-
989	10.9324	7625.75	7583.58	0	?	0	525	Calibration	-
990	10.9435	7588.92	7584.99	0	?	0	525	Calibration	-
991	10.9545	7542.77	7573.82	0	?	0	525	Calibration	-
992	10.9656	7594.79	7579.37	0	?	0	525	Calibration	-
993	10.9766	7589.45	7582.04	0	?	0	525	Calibration	-
994	10.9876	7621.3	7592.43	0	?	0	525	Calibration	-
995	10.9987	7551.76	7581.67	0	?	0	525	Calibration	-
996	11.0097	7578.5	7580.83	0	?	0	525	Calibration	-
997	11.0208	7637.88	7595.93	0	?	0	525	Calibration	-
998	11.0318	7622.94	7603.08	0	?	0	525	Calibration	-
999	11.0429	7566.29	7593.34	0	?	0	525	Calibration	-
1000	11.0539	7590.18	7592.5	0	?	0	525	Calibration	-
1001	11.0649	7577.88	7588.63	0	?	0	525	Calibration	-
1002	11.076	7567.36	7583	0	?	0	525	Calibration	-
1003	11.087	7629.38	7595.28	0	?	0	525	Calibration	-
1004	11.0981	7640.38	7607.21	0	?	0	525	Calibration	-
1005	11.1091	7603.46	7606.22	0	?	0	525	Calibration	-
1006	11.1202	7598.77	7604.25	0	?	0	525	Calibration	-
1007	11.1312	7586.01	7599.42	0	?	0	525	Calibration	-
1008	11.1422	7572.73	7592.36	0	?	0	525	Calibration	-
1009	11.1533	7613.42	7597.93	0	?	0	525	Calibration	-
1010	11.1643	7624.52	7604.97	0	?	0	525	Calibration	-
1011	11.1754	7573.62	7596.67	0	?	0	525	Calibration	-
1012	11.1864	7607.77	7599.61	0	?	0	525	Calibration	-
1013	11.1975	7588.38	7596.64	0	?	0	525	Calibration	-
1014	11.2085	7574.16	7590.69	0	?	0	525	Calibration	-
1015	11.2195	7524	7573.03	0	?	0	525	Calibration	-
1016	11.2306	7468.59	7545.39	0	?	0	525	Calibration	-
1017	11.2416	7526.5	7540.39	0	?	0	525	Calibration	-
1018	11.2527	7559.57	7545.47	0	?	0	525	Calibration	-
1019	11.2637	7557.26	7548.59	0	?	0	525	Calibration	-
1020	11.2748	7568.3	7553.81	0	?	0	525	Calibration	-
1021	11.2858	7558.88	7555.15	0	?	0	525	Calibration	-
1022	11.2968	7508.43	7542.78	0	?	0	525	Calibration	-
1023	11.3079	7523.86	7537.77	0	?	0	525	Calibration	-
1024	11.3189	7518.7	7532.72	0	?	0	525	Calibration	-
1025	11.33	7557.08	7539.17	0	?	0	525	Calibration	-
1026	11.341	7542.06	7539.94	0	?	0	525	Calibration	-
1027	11.3521	7526.35	7536.34	0	?	0	525	Calibration	-
1028	11.3631	7526.27	7533.68	0	?	0	525	Calibration	-
1029	11.3741	7578.81	7545.62	0	?	0	525	Calibration	-
1030	11.3852	7568.77	7551.75	0	?	0	525	Calibration	-
1031	11.3962	7547.15	7550.53	0	?	0	525	Calibration	-
1032	11.4073	7523.32	7543.33	0	?	0	525	Calibration	-
1033	11.4183	7583.77	7554.03	0	?	0	525	Calibration	-
1034	11.4294	7582.56	7561.59	0	?	0	525	Calibration	-
1035	11.4404	7579.46	7566.32	0	?	0	525	Calibration	-
1036	11.4514	7551.52	7562.4	0	?	0	525	Calibration	-
1037	11.4625	7537.61	7555.84	0	?	0	525	Calibration	-
1038	11.4735	7538.54	7551.26	0	?	0	525	Calibration	-
1039	11.4846	7537.71	7547.67	0	?	0	525	Calibration	-
1040	11.4956	7561.83	7551.42	0	?	0	525	Calibration	-
1041	11.5067	7513.94	7541.5	0	?	0	525	Calibration	-
1042	11.5177	7568.35	7548.61	0	?	0	525	Calibration	-
1043	11.5287	7558.78	7551.3	0	?	0	525	Calibration	-
1044	11.5398	7553.29	7551.83	0	?	0	525	Calibration	-
1045	11.5508	7525.7	7544.91	0	?	0	525	Calibration	-
1046	11.5619	7518.41	7537.9	0	?	0	525	Calibration	-
1047	11.5729	7513.92	7531.55	0	?	0	525	Calibration	-
1048	11.584	7512.9	7526.61	0	?	0	525	Calibration	-
1049	11.595	7566.14	7537.07	0	?	0	525	Calibration	-
1050	11.606	7521.79	7533.03	0	?	0	525	Calibration	-
1051	11.6171	7555.68	7539.02	0	?	0	525	Calibration	-
1052	11.6281	7504.84	7529.98	0	?	0	525	Calibration	-
1053	11.6392	7538.06	7532.12	0	?	0	525	Calibration	-
1054	11.6502	7503.84	7524.63	0	?	0	525	Calibration	-
1055	11.6613	7559.05	7533.74	0	?	0	525	Calibration	-
1056	11.6723	7565.26	7542.09	0	?	0	525	Calibration	-
1057	11.6833	7559.38	7546.66	0	?	0	525	Calibration	-
1058	11.6944	7527.55	7541.6	0	?	0	525	Calibration	-
1059	11.7054	7506.93	7532.42	0	?	0	525	Calibration	-
1060	11.7165	7572.75	7543.1	0	?	0	525	Calibration	-
1061	11.7275	7536.08	7541.24	0	?	0	525	Calibration	-
1062	11.7386	7497.73	7529.72	0	?	0	525	Calibration	-
1063	11.7496	7506.03	7523.45	0	?	0	525	Calibration	-
1064	11.7606	7493.74	7515.59	0	?	0	525	Calibration	-
1065	11.7717	7476.73	7505.3	0	?	0	525	Calibration	-
1066	11.7827	7533.97	7512.89	0	?	0	525	Calibration	-
1067	11.7938	7555.47	7524.16	0	?	0	525	Calibration	-
1068	11.8048	7493.57	7516.06	0	?	0	525	Calibration	-
1069	11.8159	7520.68	7517.29	0	?	0	525	Calibration	-
1070	11.8269	7549.74	7525.88	0	?	0	525	Calibration	-
1071	11.8379	7574.6	7538.77	0	?	0	525	Calibration	-
1072	11.849	7524.02	7534.87	0	?	0	525	Calibration	-
1073	11.86	7527.53	7532.93	0	?	0	525	Calibration	-
1074	11.8711	7548.64	7537.08	0	?	0	525	Calibration	-
1075	11.8821	7574.67	7547.03	0	?	0	525	Calibration	-
1076	11.8932	7533.73	7543.51	0	?	0	525	Calibration	-
1077	11.9042	7510.17	7534.68	0	?	0	525	Calibration	-
1078	11.9152	7493.05	7523.66	0	?	0	525	Calibration	-
1079	11.9263	7514.19	7521.16	0	?	0	525	Calibration	-
1080	11.9373	7562.44	7532.08	0	?	0	525	Calibration	-
1081	11.9484	7597.76	7549.47	0	?	0	525	Calibration	-
1082	11.9594	7556.55	7551.34	0	?	0	525	Calibration	-
1083	11.9705	7541.45	7548.72	0	?	0	525	Calibration	-
1084	11.9815	7490.48	7533.31	0	?	0	525	Calibration	-
1085	11.9925	7477.96	7518.66	0	?	0	525	Calibration	-
1086	12.0036	7533.11	7522.48	0	?	0	525	Calibration	-
1087	12.0146	7500.53	7516.67	0	?	0	525	Calibration	-
1088	12.0257	7551.06	7525.78	0	?	0	525	Calibration	-
1089	12.0367	7528.09	7526.39	0	?	0	525	Calibration	-
1090	12.0478	7515.44	7523.49	0	?	0	525	Calibration	-
1091	12.0588	7499.22	7517.07	0	?	0	525	Calibration	-
1092	12.0698	7579.55	7533.61	0	?	0	525	Calibration	-
1093	12.0809	7552.01	7538.48	0	?	0	525	Calibration	-
1094	12.0919	7532.36	7536.86	0	?	0	525	Calibration	-
1095	12.103	7460.93	7516.76	0	?	0	525	Calibration	-
1096	12.114	7480.58	7507.18	0	?	0	525	Calibration	-
1097	12.1251	7472.24	7497.93	0	?	0	525	Calibration	-
1098	12.1361	7549.16	7511.49	0	?	0	525	Calibration	-
1099	12.1471	7559.61	7524.23	0	?	0	525	Calibration	-
1100	12.1582	7508.4	7520.04	0	?	0	525	Calibration	-
1101	12.1692	7505.67	7516.23	0	?	0	525	Calibration	-
1102	12.1803	7495.84	7510.84	0	?	0	525	Calibration	-
1103	12.1913	7532.07	7516.46	0	?	0	525	Calibration	-
1104	12.2024	7503.28	7512.97	0	?	0	525	Calibration	-
1105	12.2134	7522.83	7515.58	0	?	0	525	Calibration	-
1106	12.2244	7486.36	7507.85	0	?	0	525	Calibration	-
1107	12.2355	7449.1	7492.3	0	?	0	525	Calibration	-
1108	12.2465	7484.93	7490.35	0	?	0	525	Calibration	-
1109	12.2576	7479.21	7487.4	0	?	0	525	Calibration	-
1110	12.2686	7458.16	7479.66	0	?	0	525	Calibration	-
1111	12.2797	7507.19	7486.95	0	?	0	525	Calibration	-
1112	12.2907	7491.86	7488.25	0	?	0	525	Calibration	-
1113	12.3017	7507.09	7493.24	0	?	0	525	Calibration	-
1114	12.3128	7506.82	7496.83	0	?	0	525	Calibration	-
1115	12.3238	7465.83	7488.63	0	?	0	525	Calibration	-
1116	12.3349	7445.7	7477.26	0	?	0	525	Calibration	-
1117	12.3459	7446.83	7469.21	0	?	0	525	Calibration	-
1118	12.357	7480.83	7472.29	0	?	0	525	Calibration	-
1119	12.368	7487.58	7476.33	0	?	0	525	Calibration	-
1120	12.379	7457.27	7471.29	0	?	0	525	Calibration	-
1121	12.3901	7480.94	7473.84	0	?	0	525	Calibration	-
1122	12.4011	7462.52	7470.85	0	?	0	525	Calibration	-
1123	12.4122	7482.2	7473.85	0	?	0	525	Calibration	-
1124	12.4232	7495.02	7479.45	0	?	0	525	Calibration	-
1125	12.4343	7473.17	7477.79	0	?	0	525	Calibration	-
1126	12.4453	7480.28	7478.45	0	?	0	525	Calibration	-
1127	12.4563	7478.22	7478.39	0	?	0	525	Calibration	-
1128	12.4674	7502.91	7484.88	0	?	0	525	Calibration	-
1129	12.4784	7489.27	7486.04	0	?	0	525	Calibration	-
1130	12.4895	7490.03	7487.1	0	?	0	525	Calibration	-
1131	12.5005	7501.81	7490.99	0	?	0	525	Calibration	-
1132	12.5116	7479.9	7488.06	0	?	0	525	Calibration	-
1133	12.5226	7488.99	7488.3	0	?	0	525	Calibration	-
1134	12.5336	7504.84	7492.68	0	?	0	525	Calibration	-
1135	12.5447	7470.17	7486.72	0	?	0	525	Calibration	-
1136	12.5557	7479.36	7484.77	0	?	0	525	Calibration	-
1137	12.5668	7401.26	7462.67	0	?	0	525	Calibration	-
1138	12.5778	7439.78	7456.61	0	?	0	525	Calibration	-
1139	12.5889	7427.86	7449	0	?	0	525	Calibration	-
1140	12.5999	7493.74	7460.84	0	?	0	525	Calibration	-
1141	12.6109	7507.34	7473.15	0	?	0	525	Calibration	-
1142	12.622	7502.8	7481	0	?	0	525	Calibration	-
1143	12.633	7452.52	7473.46	0	?	0	525	Calibration	-
1144	12.6441	7467.68	7471.93	0	?	0	525	Calibration	-
1145	12.6551	7438.71	7463.14	0	?	0	525	Calibration	-
1146	12.6662	7430.76	7454.57	0	?	0	525	Calibration	-
1147	12.6772	7426.58	7447.16	0	?	0	525	Calibration	-
1148	12.6882	7433.57	7443.56	0	?	0	525	Calibration	-
1149	12.6993	7454.75	7446.52	0	?	0	525	Calibration	-
1150	12.7103	7481.66	7455.82	0	?	0	525	Calibration	-
1151	12.7214	7489.31	7464.69	0	?	0	525	Calibration	-
1152	12.7324	7506.54	7475.77	0	?	0	525	Calibration	-
1153	12.7435	7533.14	7490.95	0	?	0	525	Calibration	-
1154	12.7545	7519.04	7498.39	0	?	0	525	Calibration	-
1155	12.7655	7459.72	7488.15	0	?	0	525	Calibration	-
1156	12.7766	7508.24	7493.47	0	?	0	525	Calibration	-
1157	12.7876	7488.69	7492.2	0	?	0	525	Calibration	-
1158	12.7987	7489.23	7491.42	0	?	0	525	Calibration	-
1159	12.8097	7467.6	7485.11	0	?	0	525	Calibration	-
1160	12.8208	7468.16	7480.62	0	?	0	525	Calibration	-
1161	12.8318	7500.46	7485.87	0	?	0	525	Calibration	-
1162	12.8428	7538.96	7499.93	0	?	0	525	Calibration	-
1163	12.8539	7501.03	7500.22	0	?	0	525	Calibration	-
1164	12.8649	7456.65	7488.68	0	?	0	525	Calibration	-
1165	12.876	7500.12	7491.71	0	?	0	525	Calibration	-
1166	12.887	7537.2	7503.75	0	?	0	525	Calibration	-
1167	12.8981	7509.46	7505.26	0	?	0	525	Calibration	-
1168	12.9091	7520.75	7509.36	0	?	0	525	Calibration	-
1169	12.9201	7486.19	7503.23	0	?	0	525	Calibration	-
1170	12.9312	7479.5	7496.95	0	?	0	525	Calibration	-
1171	12.9422	7461.06	7487.45	0	?	0	525	Calibration	-
1172	12.9533	7452.12	7478.1	0	?	0	525	Calibration	-
1173	12.9643	7457.35	7472.61	0	?	0	525	Calibration	-
1174	12.9754	7501.99	7480.38	0	?	0	525	Calibration	-
1175	12.9864	7460.49	7475.12	0	?	0	525	Calibration	-
1176	12.9974	7462.76	7471.85	0	?	0	525	Calibration	-
1177	13.0085	7448.44	7465.65	0	?	0	525	Calibration	-
1178	13.0195	7470.6	7466.96	0	?	0	525	Calibration	-
1179	13.0306	7459.83	7465.07	0	?	0	525	Calibration	-
1180	13.0416	7461.42	7464.11	0	?	0	525	Calibration	-
1181	13.0527	7458.57	7462.64	0	?	0	525	Calibration	-
1182	13.0637	7473.08	7465.41	0	?	0	525	Calibration	-
1183	13.0747	7439.74	7458.61	0	?	0	525	Calibration	-
1184	13.0858	7475.59	7463.11	0	?	0	525	Calibration	-
1185	13.0968	7466.21	7463.93	0	?	0	525	Calibration	-
1186	13.1079	7479.49	7468.05	0	?	0	525	Calibration	-
1187	13.1189	7508.05	7478.64	0	?	0	525	Calibration	-
1188	13.13	7493.82	7482.66	0	?	0	525	Calibration	-
1189	13.141	7518.85	7492.24	0	?	0	525	Calibration	-
1190	13.152	7494.86	7492.93	0	?	0	525	Calibration	-
1191	13.1631	7492.35	7492.78	0	?	0	525	Calibration	-
1192	13.1741	7489.48	7491.91	0	?	0	525	Calibration	-
1193	13.1852	7491.46	7491.79	0	?	0	525	Calibration	-
1194	13.1962	7462.55	7484.05	0	?	0	525	Calibration	-
1195	13.2073	7425.6	7468.58	0	?	0	525	Calibration	-
1196	13.2183	7424.81	7456.99	0	?	0	525	Calibration	-
1197	13.2293	7407.16	7443.8	0	?	0	525	Calibration	-
1198	13.2404	7418.69	7437.15	0	?	0	525	Calibration	-
1199	13.2514	7457.42	7442.52	0	?	0	525	Calibration	-
1200	13.2625	7434.89	7440.5	0	?	0	525	Calibration	-
1201	13.2735	7458.68	7445.31	0	?	0	525	Calibration	-
1202	13.2846	7426.54	7440.34	0	?	0	525	Calibration	-
1203	13.2956	7409.26	7432.11	0	?	0	525	Calibration	-
1204	13.3066	7432.31	7432.17	0	?	0	525	Calibration	-
1205	13.3177	7447.52	7436.23	0	?	0	525	Calibration	-
1206	13.3287	7466.68	7444.29	0	?	0	525	Calibration	-
1207	13.3398	7449.08	7445.56	0	?	0	525	Calibration	-
1208	13.3508	7445.7	7445.6	0	?	0	525	Calibration	-
1209	13.3619	7452.4	7447.4	0	?	0	525	Calibration	-
1210	13.3729	7415.34	7438.91	0	?	0	525	Calibration	-
1211	13.3839	7426.6	7435.65	0	?	0	525	Calibration	-
1212	13.395	7474.94	7446.05	0	?	0	525	Calibration	-
1213	13.406	7509.35	7462.81	0	?	0	525	Calibration	-
1214	13.4171	7459.89	7462.03	0	?	0	525	Calibration	-
1215	13.4281	7479.58	7466.68	0	?	0	525	Calibration	-
1216	13.4392	7484.08	7471.29	0	?	0	525	Calibration	-
1217	13.4502	7467.92	7470.39	0	?	0	525	Calibration	-
1218	13.4612	7446.07	7463.96	0	?	0	525	Calibration	-
1219	13.4723	7457.31	7462.2	0	?	0	525	Calibration	-
1220	13.4833	7477.75	7466.31	0	?	0	525	Calibration	-
1221	13.4944	7488.08	7472.08	0	?	0	525	Calibration	-
1222	13.5054	7480.95	7474.43	0	?	0	525	Calibration	-
1223	13.5165	7518.94	7486.21	0	?	0	525	Calibration	-
1224	13.5275	7487.21	7486.47	0	?	0	525	Calibration	-
1225	13.5385	7461.11	7479.76	0	?	0	525	Calibration	-
1226	13.5496	7452.96	7472.67	0	?	0	525	Calibration	-
1227	13.5606	7430.41	7461.48	0	?	0	525	Calibration	-
1228	13.5717	7439.2	7455.58	0	?	0	525	Calibration	-
1229	13.5827	7431.27	7449.15	0	?	0	525	Calibration	-
1230	13.5938	7460.33	7452.11	0	?	0	525	Calibration	-
1231	13.6048	7465.65	7455.69	0	?	0	525	Calibration	-
1232	13.6158	7430.9	7449.13	0	?	0	525	Calibration	-
1233	13.6269	7433.29	7444.94	0	?	0	525	Calibration	-
1234	13.6379	7431.84	7441.47	0	?	0	525	Calibration	-
1235	13.649	7451.71	7444.18	0	?	0	525	Calibration	-
1236	13.66	7491.83	7456.79	0	?	0	525	Calibration	-
1237	13.6711	7504.28	7469.36	0	?	0	525	Calibration	-
1238	13.6821	7449.68	7464.15	0	?	0	525	Calibration	-
1239	13.6931	7423.85	7453.49	0	?	0	525	Calibration	-
1240	13.7042	7431.98	7447.79	0	?	0	525	Calibration	-
1241	13.7152	7434.19	7444.19	0	?	0	525	Calibration	-
1242	13.7263	7409.75	7435.07	0	?	0	525	Calibration	-
1243	13.7373	7412.03	7428.97	0	?	0	525	Calibration	-
1244	13.7484	7460.44	7437.3	0	?	0	525	Calibration	-
1245	13.7594	7408.95	7429.8	0	?	0	525	Calibration	-
1246	13.7704	7443.02	7433.3	0	?	0	525	Calibration	-
1247	13.7815	7470.25	7443.08	0	?	0	525	Calibration	-
1248	13.7925	7439.98	7442.26	0	?	0	525	Calibration	-
1249	13.8036	7430.29	7439.09	0	?	0	525	Calibration	-
1250	13.8146	7441	7439.6	0	?	0	525	Calibration	-
1251	13.8257	7436.89	7438.88	0	?	0	525	Calibration	-
1252	13.8367	7455.84	7443.37	0	?	0	525	Calibration	-
1253	13.8477	7446.29	7444.14	0	?	0	525	Calibration	-
1254	13.8588	7413.95	7436.15	0	?	0	525	Calibration	-
1255	13.8698	7383.65	7422.25	0	?	0	525	Calibration	-
1256	13.8809	7413.31	7419.89	0	?	0	525	Calibration	-
1257	13.8919	7413.7	7418.25	0	?	0	525	Calibration	-
1258	13.903	7410.86	7416.29	0	?	0	525	Calibration	-
1259	13.914	7433.06	7420.73	0	?	0	525	Calibration	-
1260	13.925	7435.21	7424.56	0	?	0	525	Calibration	-
1261	13.9361	7472.86	7437.35	0	?	0	525	Calibration	-
1262	13.9471	7531.38	7462.24	0	?	0	525	Calibration	-
1263	13.9582	7497.61	7471.6	0	?	0	525	Calibration	-
1264	13.9692	7466.56	7470.27	0	?	0	525	Calibration	-
1265	13.9803	7437.48	7461.59	0	?	0	525	Calibration	-
1266	13.9913	7448.93	7458.24	0	?	0	525	Calibration	-
1267	14.0023	7436.11	7452.38	0	?	0	525	Calibration	-
1268	14.0134	7417.2	7443.07	0	?	0	525	Calibration	-
1269	14.0244	7455.82	7446.44	0	?	0	525	Calibration	-
1270	14.0355	7407.99	7436.27	0	?	0	525	Calibration	-
1271	14.0465	7421.95	7432.48	0	?	0	525	Calibration	-
1272	14.0576	7448.17	7436.63	0	?	0	525	Calibration	-
1273	14.0686	7424.41	7433.39	0	?	0	525	Calibration	-
1274	14.0796	7440.29	7435.22	0	?	0	525	Calibration	-
1275	14.0907	7417.65	7430.57	0	?	0	525	Calibration	-
1276	14.1017	7442.32	7433.68	0	?	0	525	Calibration	-
1277	14.1128	7436.39	7434.4	0	?	0	525	Calibration	-
1278	14.1238	7385.89	7421.55	0	?	0	525	Calibration	-
1279	14.1349	7433.33	7424.67	0	?	0	525	Calibration	-
1280	14.1459	7483.6	7440.27	0	?	0	525	Calibration	-
1281	14.1569	7452.9	7443.61	0	?	0	525	Calibration	-
1282	14.168	7445.73	7444.17	0	?	0	525	Calibration	-
1283	14.179	7440.66	7443.24	0	?	0	525	Calibration	-
1284	14.1901	7398.42	7431.38	0	?	0	525	Calibration	-
1285	14.2011	7373.88	7416.16	0	?	0	525	Calibration	-
1286	14.2122	7365.22	7402.67	0	?	0	525	Calibration	-
1287	14.2232	7405.16	7403.33	0	?	0	525	Calibration	-
1288	14.2342	7420.88	7407.97	0	?	0	525	Calibration	-
1289	14.2453	7381.24	7400.9	0	?	0	525	Calibration	-
1290	14.2563	7415.58	7404.78	0	?	0	525	Calibration	-
1291	14.2674	7372.27	7396.18	0	?	0	525	Calibration	-
1292	14.2784	7373.54	7390.19	0	?	0	525	Calibration	-
1293	14.2895	7373.7	7385.82	0	?	0	525	Calibration	-
1294	14.3005	7390.41	7387.04	0	?	0	525	Calibration	-
1295	14.3115	7410.69	7393.3	0	?	0	525	Calibration	-
1296	14.3226	7458.6	7410.58	0	?	0	525	Calibration	-
1297	14.3336	7440.51	7418.51	0	?	0	525	Calibration	-
1298	14.3447	7390.85	7411.19	0	?	0	525	Calibration	-
1299	14.3557	7408.35	7410.44	0	?	0	525	Calibration	-
1300	14.3668	7426.33	7414.64	0	?	0	525	Calibration	-
1301	14.3778	7412.98	7414.2	0	?	0	525	Calibration	-
1302	14.3888	7395.35	7409.21	0	?	0	525	Calibration	-
1303	14.3999	7401.9	7407.28	0	?	0	525	Calibration	-
1304	14.4109	7370.62	7397.57	0	?	0	525	Calibration	-
1305	14.422	7408.06	7400.35	0	?	0	525	Calibration	-
1306	14.433	7387.67	7396.99	0	?	0	525	Calibration	-
1307	14.4441	7413.23	7401.29	0	?	0	525	Calibration	-
1308	14.4551	7389.71	7398.23	0	?	0	525	Calibration	-
1309	14.4661	7415.76	7402.87	0	?	0	525	Calibration	-
1310	14.4772	7426.07	7409.01	0	?	0	525	Calibration	-
1311	14.4882	7371.04	7398.96	0	?	0	525	Calibration	-
1312	14.4993	7380.58	7394.1	0	?	0	525	Calibration	-
1313	14.5103	7419.26	7400.76	0	?	0	525	Calibration	-
1314	14.5214	7415.99	7404.79	0	?	0	525	Calibration	-
1315	14.5324	7427.84	7410.89	0	?	0	525	Calibration	-
1316	14.5434	7425.53	7414.77	0	?	0	525	Calibration	-
1317	14.5545	7425.07	7417.49	0	?	0	525	Calibration	-
1318	14.5655	7416.49	7417.23	0	?	0	525	Calibration	-
1319	14.5766	7418.6	7417.59	0	?	0	525	Calibration	-
1320	14.5876	7392.91	7411.06	0	?	0	525	Calibration	-
1321	14.5987	7423.69	7414.4	0	?	0	525	Calibration	-
1322	14.6097	7439.3	7420.99	0	?	0	525	Calibration	-
1323	14.6207	7423.53	7421.66	0	?	0	525	Calibration	-
1324	14.6318	7393.83	7414.3	0	?	0	525	Calibration	-
1325	14.6428	7450.5	7423.88	0	?	0	525	Calibration	-
1326	14.6539	7447.44	7430.12	0	?	0	525	Calibration	-
1327	14.6649	7406.62	7423.9	0	?	0	525	Calibration	-
1328	14.676	7377.85	7411.71	0	?	0	525	Calibration	-
1329	14.687	7369.88	7400.64	0	?	0	525	Calibration	-
1330	14.698	7389.14	7397.59	0	?	0	525	Calibration	-
1331	14.7091	7399.83	7398.19	0	?	0	525	Calibration	-
1332	14.7201	7370.12	7390.76	0	?	0	525	Calibration	-
1333	14.7312	7377.81	7387.33	0	?	0	525	Calibration	-
1334	14.7422	7392.08	7388.59	0	?	0	525	Calibration	-
1335	14.7533	7412.81	7395	0	?	0	525	Calibration	-
1336	14.7643	7428.73	7403.93	0	?	0	525	Calibration	-
1337	14.7753	7401.76	7403.35	0	?	0	525	Calibration	-
1338	14.7864	7367.94	7393.98	0	?	0	525	Calibration	-
1339	14.7974	7366.43	7386.69	0	?	0	525	Calibration	-
1340	14.8085	7357.59	7378.99	0	?	0	525	Calibration	-
1341	14.8195	7355.44	7372.75	0	?	0	525	Calibration	-
1342	14.8306	7369.2	7371.81	0	?	0	525	Calibration	-
1343	14.8416	7384.9	7375.27	0	?	0	525	Calibration	-
1344	14.8526	7342.95	7366.72	0	?	0	525	Calibration	-
1345	14.8637	7370.9	7367.82	0	?	0	525	Calibration	-
1346	14.8747	7390.22	7373.75	0	?	0	525	Calibration	-
1347	14.8858	7382.49	7376.06	0	?	0	525	Calibration	-
1348	14.8968	7376.91	7376.29	0	?	0	525	Calibration	-
1349	14.9079	7390.49	7380.05	0	?	0	525	Calibration	-
1350	14.9189	7398.49	7384.93	0	?	0	525	Calibration	-
1351	14.9299	7371.42	7381.35	0	?	0	525	Calibration	-
1352	14.941	7394.62	7384.87	0	?	0	525	Calibration	-
1353	14.952	7384.71	7384.82	0	?	0	525	Calibration	-
1354	14.9631	7411.36	7391.85	0	?	0	525	Calibration	-
1355	14.9741	7391.99	7391.89	0	?	0	525	Calibration	-
1356	14.9852	7394.3	7392.53	0	?	0	525	Calibration	-
1357	14.9962	7365.39	7385.34	0	?	0	525	Calibration	-
1358	15.0072	7382.41	7384.56	0	?	0	525	Calibration	-
1359	15.0183	7367.03	7379.92	0	?	0	525	Calibration	-
1360	15.0293	7370.32	7377.38	0	?	0	525	Calibration	-
1361	15.0404	7364.45	7373.96	0	?	0	525	Calibration	-
1362	15.0514	7391.23	7378.53	0	?	0	525	Calibration	-
1363	15.0625	7387.5	7380.9	0	?	0	525	Calibration	-
1364	15.0735	7370.6	7378.18	0	?	0	525	Calibration	-
1365	15.0845	7369.99	7376.01	0	?	0	525	Calibration	-
1366	15.0956	7372.68	7375.13	0	?	0	525	Calibration	-
1367	15.1066	7369.83	7373.73	0	?	0	525	Calibration	-
1368	15.1177	7385.96	7376.96	0	?	0	525	Calibration	-
1369	15.1287	7380.46	7377.89	0	?	0	525	Calibration	-
1370	15.1398	7375.34	7377.22	0	?	0	525	Calibration	-
1371	15.1508	7390.92	7380.84	0	?	0	525	Calibration	-
1372	15.1618	7354.51	7373.87	0	?	0	525	Calibration	-
1373	15.1729	7394.78	7379.41	0	?	0	525	Calibration	-
1374	15.1839	7402.8	7385.6	0	?	0	525	Calibration	-
1375	15.195	7374.6	7382.69	0	?	0	525	Calibration	-
1376	15.206	7410.77	7390.12	0	?	0	525	Calibration	-
1377	15.2171	7418.67	7397.68	0	?	0	525	Calibration	-
1378	15.2281	7400.28	7398.37	0	?	0	525	Calibration	-
1379	15.2391	7390.12	7396.19	0	?	0	525	Calibration	-
1380	15.2502	7394.07	7395.63	0	?	0	525	Calibration	-
1381	15.2612	7399.15	7396.56	0	?	0	525	Calibration	-
1382	15.2723	7405.96	7399.05	0	?	0	525	Calibration	-
1383	15.2833	7367.89	7390.8	0	?	0	525	Calibration	-
1384	15.2944	7398.41	7392.81	0	?	0	525	Calibration	-
1385	15.3054	7374.36	7387.93	0	?	0	525	Calibration	-
1386	15.3164	7348.65	7377.53	0	?	0	525	Calibration	-
1387	15.3275	7413.35	7387.01	0	?	0	525	Calibration	-
1388	15.3385	7408.61	7392.73	0	?	0	525	Calibration	-
1389	15.3496	7416.95	7399.14	0	?	0	525	Calibration	-
1390	15.3606	7337.32	7382.78	0	?	0	525	Calibration	-
1391	15.3717	7354.21	7375.22	0	?	0	525	Calibration	-
1392	15.3827	7370.51	7373.97	0	?	0	525	Calibration	-
1393	15.3937	7351.65	7368.06	0	?	0	525	Calibration	-
1394	15.4048	7350.64	7363.45	0	?	0	525	Calibration	-
1395	15.4158	7341.05	7357.52	0	?	0	525	Calibration	-
1396	15.4269	7396.24	7367.77	0	?	0	525	Calibration	-
1397	15.4379	7426.65	7383.35	0	?	0	525	Calibration	-
1398	15.449	7442.19	7398.93	0	?	0	525	Calibration	-
1399	15.46	7391.94	7397.08	0	?	0	525	Calibration	-
1400	15.471	7381.01	7392.82	0	?	0	525	Calibration	-
1401	15.4821	7424.34	7401.17	0	?	0	525	Calibration	-
1402	15.4931	7340.25	7385.04	0	?	0	525	Calibration	-
1403	15.5042	7385.94	7385.28	0	?	0	525	Calibration	-
1404	15.5152	7356.35	7377.62	0	?	0	525	Calibration	-
1405	15.5263	7365.81	7374.5	0	?	0	525	Calibration	-
1406	15.5373	7384.93	7377.26	0	?	0	525	Calibration	-
1407	15.5483	7383.58	7378.93	0	?	0	525	Calibration	-
1408	15.5594	7325.76	7364.86	0	?	0	525	Calibration	-
1409	15.5704	7359.27	7363.38	0	?	0	525	Calibration	-
1410	15.5815	7349.93	7359.82	0	?	0	525	Calibration	-
1411	15.5925	7354.74	7358.47	0	?	0	525	Calibration	-
1412	15.6036	7357.27	7358.16	0	?	0	525	Calibration	-
1413	15.6146	7358.1	7358.14	0	?	0	525	Calibration	-
1414	15.6256	7409.03	7371.61	0	?	0	525	Calibration	-
1415	15.6367	7406.82	7380.93	0	?	0	525	Calibration	-
1416	15.6477	7383.06	7381.5	0	?	0	525	Calibration	-
1417	15.6588	7376.92	7380.28	0	?	0	525	Calibration	-
1418	15.6698	7381.84	7380.7	0	?	0	525	Calibration	-
1419	15.6809	7386.03	7382.11	0	?	0	525	Calibration	-
1420	15.6919	7392.3	7384.81	0	?	0	525	Calibration	-
1421	15.7029	7378.42	7383.12	0	?	0	525	Calibration	-
1422	15.714	7379.28	7382.1	0	?	0	525	Calibration	-
1423	15.725	7394.66	7385.42	0	?	0	525	Calibration	-
1424	15.7361	7381.79	7384.46	0	?	0	525	Calibration	-
1425	15.7471	7374.29	7381.77	0	?	0	525	Calibration	-
1426	15.7582	7367.77	7378.06	0	?	0	525	Calibration	-
1427	15.7692	7349.78	7370.58	0	?	0	525	Calibration	-
1428	15.7802	7383.31	7373.95	0	?	0	525	Calibration	-
1429	15.7913	7360.44	7370.37	0	?	0	525	Calibration	-
1430	15.8023	7378.51	7372.53	0	?	0	525	Calibration	-
1431	15.8134	7367.73	7371.26	0	?	0	525	Calibration	-
1432	15.8244	7376.72	7372.7	0	?	0	525	Calibration	-
1433	15.8355	7380.99	7374.9	0	?	0	525	Calibration	-
1434	15.8465	7340.25	7365.73	0	?	0	525	Calibration	-
1435	15.8575	7362.74	7364.93	0	?	0	525	Calibration	-
1436	15.8686	7364	7364.69	0	?	0	525	Calibration	-
1437	15.8796	7397.34	7373.33	0	?	0	525	Calibration	-
1438	15.8907	7400.31	7380.47	0	?	0	525	Calibration	-
1439	15.9017	7369.2	7377.49	0	?	0	525	Calibration	-
1440	15.9128	7354.54	7371.41	0	?	0	525	Calibration	-
1441	15.9238	7325.58	7359.28	0	?	0	525	Calibration	-
1442	15.9348	7409.28	7372.52	0	?	0	525	Calibration	-
1443	15.9459	7360.17	7369.25	0	?	0	525	Calibration	-
1444	15.9569	7325.04	7357.55	0	?	0	525	Calibration	-
1445	15.968	7330.23	7350.32	0	?	0	525	Calibration	-
1446	15.979	7370.4	7355.63	0	?	0	525	Calibration	-
1447	15.9901	7355.09	7355.49	0	?	0	525	Calibration	-
1448	16.0011	7350.14	7354.07	0	?	0	525	Calibration	-
1449	16.0121	7412.96	7369.66	0	?	0	525	Calibration	-
1450	16.0232	7434.8	7386.9	0	?	0	525	Calibration	-
1451	16.0342	7404.77	7391.63	0	?	0	525	Calibration	-
1452	16.0453	7376.82	7387.71	0	?	0	525	Calibration	-
1453	16.0563	7371.98	7383.55	0	?	0	525	Calibration	-
1454	16.0674	7407.83	7389.98	0	?	0	525	Calibration	-
1455	16.0784	7403.86	7393.65	0	?	0	525	Calibration	-
1456	16.0894	7404.24	7396.46	0	?	0	525	Calibration	-
1457	16.1005	7370.88	7389.68	0	?	0	525	Calibration	-
1458	16.1115	7351.12	7379.48	0	?	0	525	Calibration	-
1459	16.1226	7321.01	7364	0	?	0	525	Calibration	-
1460	16.1336	7344.24	7358.77	0	?	0	525	Calibration	-
1461	16.1447	7347.85	7355.88	0	?	0	525	Calibration	-
1462	16.1557	7364.49	7358.16	0	?	0	525	Calibration	-
1463	16.1667	7376.24	7362.95	0	?	0	525	Calibration	-
1464	16.1778	7388.41	7369.68	0	?	0	525	Calibration	-
1465	16.1888	7380.74	7372.61	0	?	0	525	Calibration	-
1466	16.1999	7369.59	7371.81	0	?	0	525	Calibration	-
1467	16.2109	7305.16	7354.17	0	?	0	525	Calibration	-
1468	16.222	7319.83	7345.08	0	?	0	525	Calibration	-
1469	16.233	7340.76	7343.94	0	?	0	525	Calibration	-
1470	16.244	7337.75	7342.3	0	?	0	525	Calibration	-
1471	16.2551	7382.19	7352.86	0	?	0	525	Calibration	-
1472	16.2661	7424.24	7371.75	0	?	0	525	Calibration	-
1473	16.2772	7426.01	7386.12	0	?	0	525	Calibration	-
1474	16.2882	7409.84	7392.4	0	?	0	525	Calibration	-
1475	16.2993	7327.93	7375.33	0	?	0	525	Calibration	-
1476	16.3103	7360.61	7371.44	0	?	0	525	Calibration	-
1477	16.3213	7396.6	7378.1	0	?	0	525	Calibration	-
1478	16.3324	7390.26	7381.32	0	?	0	525	Calibration	-
1479	16.3434	7414.05	7389.98	0	?	0	525	Calibration	-
1480	16.3545	7356.14	7381.02	0	?	0	525	Calibration	-
1481	16.3655	7351.59	7373.23	0	?	0	525	Calibration	-
1482	16.3766	7361.67	7370.17	0	?	0	525	Calibration	-
1483	16.3876	7337.39	7361.49	0	?	0	525	Calibration	-
1484	16.3986	7366.76	7362.89	0	?	0	525	Calibration	-
1485	16.4097	7382.33	7368.03	0	?	0	525	Calibration	-
1486	16.4207	7391.27	7374.19	0	?	0	525	Calibration	-
1487	16.4318	7367.08	7372.31	0	?	0	525	Calibration	-
1488	16.4428	7416.52	7384.01	0	?	0	525	Calibration	-
1489	16.4539	7365.46	7379.1	0	?	0	525	Calibration	-
1490	16.4649	7402.57	7385.31	0	?	0	525	Calibration	-
1491	16.4759	7363.09	7379.43	0	?	0	525	Calibration	-
1492	16.487	7339.47	7368.85	0	?	0	525	Calibration	-
1493	16.498	7378.56	7371.42	0	?	0	525	Calibration	-
1494	16.5091	7411.97	7382.16	0	?	0	525	Calibration	-
1495	16.5201	7372.97	7379.72	0	?	0	525	Calibration	-
1496	16.5312	7371.95	7377.67	0	?	0	525	Calibration	-
1497	16.5422	7411.75	7386.69	0	?	0	525	Calibration	-
1498	16.5532	7377.18	7384.17	0	?	0	525	Calibration	-
1499	16.5643	7389.65	7385.62	0	?	0	525	Calibration	-
1500	16.5753	7390.35	7386.87	0	?	0	525	Calibration	-
1501	16.5864	7391.52	7388.1	0	?	0	525	Calibration	-
1502	16.5974	7384.12	7387.05	0	?	0	525	Calibration	-
1503	16.6085	7367.66	7381.92	0	?	0	525	Calibration	-
1504	16.6195	7343.78	7371.82	0	?	0	525	Calibration	-
1505	16.6305	7330.14	7360.79	0	?	0	525	Calibration	-
1506	16.6416	7402.02	7371.7	0	?	0	525	Calibration	-
1507	16.6526	7400.23	7379.25	0	?	0	525	Calibration	-
1508	16.6637	7343.83	7369.88	0	?	0	525	Calibration	-
1509	16.6747	7367.79	7369.33	0	?	0	525	Calibration	-
1510	16.6858	7394.44	7375.97	0	?	0	525	Calibration	-
1511	16.6968	7462.83	7398.97	0	?	0	525	Calibration	-
1512	16.7078	7472.42	7418.41	0	?	0	525	Calibration	-
1513	16.7189	7430.1	7421.5	0	?	0	525	Calibration	-
1514	16.7299	7457.26	7430.97	0	?	0	525	Calibration	-
1515	16.741	7481.55	7444.36	0	?	0	525	Calibration	-
1516	16.752	7444.59	7444.42	0	?	0	525	Calibration	-
1517	16.7631	7415.93	7436.88	0	?	0	525	Calibration	-
1518	16.7741	7443.04	7438.51	0	?	0	525	Calibration	-
1519	16.7851	7379.8	7422.97	0	?	0	525	Calibration	-
1520	16.7962	7337.34	7400.3	0	?	0	525	Calibration	-
1521	16.8072	7351.6	7387.41	0	?	0	525	Calibration	-
1522	16.8183	7330.09	7372.24	0	?	0	525	Calibration	-
1523	16.8293	7356.07	7367.96	0	?	0	525	Calibration	-
1524	16.8404	7376.31	7370.17	0	?	0	525	Calibration	-
1525	16.8514	7366.15	7369.11	0	?	0	525	Calibration	-
1526	16.8624	7457.85	7392.6	0	?	0	525	Calibration	-
1527	16.8735	7407.58	7396.56	0	?	0	525	Calibration	-
1528	16.8845	7355.42	7385.67	0	?	0	525	Calibration	-
1529	16.8956	7352.73	7376.95	0	?	0	525	Calibration	-
1530	16.9066	7341.64	7367.6	0	?	0	525	Calibration	-
1531	16.9177	7358.49	7365.19	0	?	0	525	Calibration	-
1532	16.9287	7391.92	7372.27	0	?	0	525	Calibration	-
1533	16.9397	7343.1	7364.55	0	?	0	525	Calibration	-
1534	16.9508	7349.69	7360.61	0	?	0	525	Calibration	-
1535	16.9618	7372.39	7363.73	0	?	0	525	Calibration	-
1536	16.9729	7344.71	7358.69	0	?	0	525	Calibration	-
1537	16.9839	7369.23	7361.48	0	?	0	525	Calibration	-
1538	16.995	7372.56	7364.42	0	?	0	525	Calibration	-
1539	17.006	7422.03	7379.67	0	?	0	525	Calibration	-
1540	17.017	7378.82	7379.44	0	?	0	525	Calibration	-
1541	17.0281	7332.21	7366.94	0	?	0	525	Calibration	-
1542	17.0391	7347.95	7361.91	0	?	0	525	Calibration	-
1543	17.0502	7377.4	7366.01	0	?	0	525	Calibration	-
1544	17.0612	7381.46	7370.1	0	?	0	525	Calibration	-
1545	17.0723	7382.41	7373.36	0	?	0	525	Calibration	-
1546	17.0833	7365.55	7371.29	0	?	0	525	Calibration	-
1547	17.0943	7334.32	7361.51	0	?	0	525	Calibration	-
1548	17.1054	7357.33	7360.4	0	?	0	525	Calibration	-
1549	17.1164	7373.32	7363.82	0	?	0	525	Calibration	-
1550	17.1275	7401.91	7373.9	0	?	0	525	Calibration	-
1551	17.1385	7331.76	7362.75	0	?	0	525	Calibration	-
1552	17.1496	7320.2	7351.48	0	?	0	525	Calibration	-
1553	17.1606	7354.61	7352.31	0	?	0	525	Calibration	-
1554	17.1716	7375.64	7358.49	0	?	0	525	Calibration	-
1555	17.1827	7329.11	7350.71	0	?	0	525	Calibration	-
1556	17.1937	7327.85	7344.66	0	?	0	525	Calibration	-
1557	17.2048	7353.32	7346.95	0	?	0	525	Calibration	-
1558	17.2158	7336.68	7344.23	0	?	0	525	Calibration	-
1559	17.2269	7332.59	7341.15	0	?	0	525	Calibration	-
1560	17.2379	7357.7	7345.53	0	?	0	525	Calibration	-
1561	17.2489	7350.46	7346.84	0	?	0	525	Calibration	-
1562	17.26	7304.27	7335.57	0	?	0	525	Calibration	-
1563	17.271	7324.17	7332.55	0	?	0	525	Calibration	-
1564	17.2821	7331.38	7332.24	0	?	0	525	Calibration	-
1565	17.2931	7357.73	7338.99	0	?	0	525	Calibration	-
1566	17.3042	7355.95	7343.48	0	?	0	525	Calibration	-
1567	17.3152	7366	7349.44	0	?	0	525	Calibration	-
1568	17.3262	7401.75	7363.29	0	?	0	525	Calibration	-
1569	17.3373	7388.58	7369.98	0	?	0	525	Calibration	-
1570	17.3483	7393.02	7376.08	0	?	0	525	Calibration	-
1571	17.3594	7401.07	7382.7	0	?	0	525	Calibration	-
1572	17.3704	7388.86	7384.33	0	?	0	525	Calibration	-
1573	17.3815	7417.01	7392.98	0	?	0	525	Calibration	-
1574	17.3925	7409.19	7397.27	0	?	0	525	Calibration	-
1575	17.4035	7336.62	7381.22	0	?	0	525	Calibration	-
1576	17.4146	7298.49	7359.32	0	?	0	525	Calibration	-
1577	17.4256	7249.05	7330.13	0	?	0	525	Calibration	-
1578	17.4367	7302.43	7322.8	0	?	0	525	Calibration	-
1579	17.4477	7298.3	7316.31	0	?	0	525	Calibration	-
1580	17.4588	7308.96	7314.37	0	?	0	525	Calibration	-
1581	17.4698	7350	7323.8	0	?	0	525	Calibration	-
1582	17.4808	7404.41	7345.14	0	?	0	525	Calibration	-
1583	17.4919	7346.89	7345.6	0	?	0	525	Calibration	-
1584	17.5029	7302.51	7334.19	0	?	0	525	Calibration	-
1585	17.514	7297.42	7324.46	0	?	0	525	Calibration	-
1586	17.525	7275.62	7311.53	0	?	0	525	Calibration	-
1587	17.5361	7310.83	7311.35	0	?	0	525	Calibration	-
1588	17.5471	7361.72	7324.68	0	?	0	525	Calibration	-
1589	17.5581	7327.84	7325.52	0	?	0	525	Calibration	-
1590	17.5692	7330.57	7326.86	0	?	0	525	Calibration	-
1591	17.5802	7304.6	7320.97	0	?	0	525	Calibration	-
1592	17.5913	7322.43	7321.35	0	?	0	525	Calibration	-
1593	17.6023	7293.07	7313.87	0	?	0	525	Calibration	-
1594	17.6134	7296.2	7309.19	0	?	0	525	Calibration	-
1595	17.6244	7324.94	7313.36	0	?	0	525	Calibration	-
1596	17.6354	7357.95	7325.16	0	?	0	525	Calibration	-
1597	17.6465	7376.84	7338.84	0	?	0	525	Calibration	-
1598	17.6575	7385.93	7351.31	0	?	0	525	Calibration	-
1599	17.6686	7350.75	7351.16	0	?	0	525	Calibration	-
1600	17.6796	7365.04	7354.83	0	?	0	525	Calibration	-
1601	17.6907	7404.48	7367.98	0	?	0	525	Calibration	-
1602	17.7017	7346.44	7362.27	0	?	0	525	Calibration	-
1603	17.7127	7305.76	7347.31	0	?	0	525	Calibration	-
1604	17.7238	7367.09	7352.55	0	?	0	525	Calibration	-
1605	17.7348	7372	7357.7	0	?	0	525	Calibration	-
1606	17.7459	7369.55	7360.84	0	?	0	525	Calibration	-
1607	17.7569	7341.17	7355.63	0	?	0	525	Calibration	-
1608	17.768	7323.74	7347.19	0	?	0	525	Calibration	-
1609	17.779	7327.35	7341.94	0	?	0	525	Calibration	-
1610	17.79	7368.2	7348.89	0	?	0	525	Calibration	-
1611	17.8011	7349.46	7349.04	0	?	0	525	Calibration	-
1612	17.8121	7307.91	7338.15	0	?	0	525	Calibration	-
1613	17.8232	7310.2	7330.75	0	?	0	525	Calibration	-
1614	17.8342	7323.15	7328.74	0	?	0	525	Calibration	-
1615	17.8453	7304.42	7322.3	0	?	0	525	Calibration	-
1616	17.8563	7305.44	7317.84	0	?	0	525	Calibration	-
1617	17.8673	7298.88	7312.82	0	?	0	525	Calibration	-
1618	17.8784	7343.99	7321.07	0	?	0	525	Calibration	-
1619	17.8894	7367.82	7333.44	0	?	0	525	Calibration	-
1620	17.9005	7348.99	7337.56	0	?	0	525	Calibration	-
1621	17.9115	7375.67	7347.65	0	?	0	525	Calibration	-
1622	17.9226	7333.41	7343.88	0	?	0	525	Calibration	-
1623	17.9336	7330.65	7340.37	0	?	0	525	Calibration	-
1624	17.9446	7362.03	7346.11	0	?	0	525	Calibration	-
1625	17.9557	7331.97	7342.36	0	?	0	525	Calibration	-
1626	17.9667	7363.76	7348.03	0	?	0	525	Calibration	-
1627	17.9778	7394.35	7360.29	0	?	0	525	Calibration	-
1628	17.9888	7368.48	7362.46	0	?	0	525	Calibration	-
1629	17.9999	7348.4	7358.74	0	?	0	525	Calibration	-
1630	18.0109	7293.27	7341.41	0	?	0	525	Calibration	-
1631	18.0219	7314.03	7334.16	0	?	0	525	Calibration	-
1632	18.033	7366.9	7342.83	0	?	0	525	Calibration	-
1633	18.044	7317.18	7336.04	0	?	0	525	Calibration	-
1634	18.0551	7348.95	7339.45	0	?	0	525	Calibration	-
1635	18.0661	7414.76	7359.39	0	?	0	525	Calibration	-
1636	18.0772	7423.22	7376.28	0	?	0	525	Calibration	-
1637	18.0882	7401.43	7382.94	0	?	0	525	Calibration	-
1638	18.0992	7369.96	7379.5	0	?	0	525	Calibration	-
1639	18.1103	7355.73	7373.21	0	?	0	525	Calibration	-
1640	18.1213	7340.11	7364.45	0	?	0	525	Calibration	-
1641	18.1324	7384.92	7369.87	0	?	0	525	Calibration	-
1642	18.1434	7383.86	7373.57	0	?	0	525	Calibration	-
1643	18.1545	7387.08	7377.15	0	?	0	525	Calibration	-
1644	18.1655	7398.92	7382.91	0	?	0	525	Calibration	-
1645	18.1765	7331.67	7369.35	0	?	0	525	Calibration	-
1646	18.1876	7269.97	7343.04	0	?	0	525	Calibration	-
1647	18.1986	7287.01	7328.21	0	?	0	525	Calibration	-
1648	18.2097	7211	7297.18	0	?	0	525	Calibration	-
1649	18.2207	7236.97	7281.24	0	?	0	525	Calibration	-
1650	18.2318	7277.03	7280.13	0	?	0	525	Calibration	-
1651	18.2428	7292.8	7283.48	0	?	0	525	Calibration	-
1652	18.2538	7373.66	7307.35	0	?	0	525	Calibration	-
1653	18.2649	7358.52	7320.9	0	?	0	525	Calibration	-
1654	18.2759	7349.29	7328.41	0	?	0	525	Calibration	-
1655	18.287	7335.94	7330.41	0	?	0	525	Calibration	-
1656	18.298	7364.76	7339.5	0	?	0	525	Calibration	-
1657	18.3091	7339.49	7339.5	0	?	0	525	Calibration	-
1658	18.3201	7304.02	7330.11	0	?	0	525	Calibration	-
1659	18.3311	7282.91	7317.61	0	?	0	525	Calibration	-
1660	18.3422	7313.54	7316.53	0	?	0	525	Calibration	-
1661	18.3532	7337.41	7322.06	0	?	0	525	Calibration	-
1662	18.3643	7342.43	7327.45	0	?	0	525	Calibration	-
1663	18.3753	7325.49	7326.93	0	?	0	525	Calibration	-
1664	18.3864	7318.25	7324.63	0	?	0	525	Calibration	-
1665	18.3974	7333.7	7327.03	0	?	0	525	Calibration	-
1666	18.4084	7280.33	7314.67	0	?	0	525	Calibration	-
1667	18.4195	7336.83	7320.54	0	?	0	525	Calibration	-
1668	18.4305	7357.77	7330.39	0	?	0	525	Calibration	-
1669	18.4416	7318.97	7327.37	0	?	0	525	Calibration	-
1670	18.4526	7315.66	7324.27	0	?	0	525	Calibration	-
1671	18.4637	7312.23	7321.08	0	?	0	525	Calibration	-
1672	18.4747	7354.85	7330.02	0	?	0	525	Calibration	-
1673	18.4857	7362.51	7338.62	0	?	0	525	Calibration	-
1674	18.4968	7311.06	7331.33	0	?	0	525	Calibration	-
1675	18.5078	7342.16	7334.19	0	?	0	525	Calibration	-
1676	18.5189	7359.93	7341.01	0	?	0	525	Calibration	-
1677	18.5299	7379.22	7351.12	0	?	0	525	Calibration	-
1678	18.541	7377.59	7358.13	0	?	0	525	Calibration	-
1679	18.552	7387.59	7365.93	0	?	0	525	Calibration	-
1680	18.563	7337.94	7358.52	0	?	0	525	Calibration	-
1681	18.5741	7281.68	7338.18	0	?	0	525	Calibration	-
1682	18.5851	7290.51	7325.56	0	?	0	525	Calibration	-
1683	18.5962	7281.93	7314.01	0	?	0	525	Calibration	-
1684	18.6072	7278.92	7304.72	0	?	0	525	Calibration	-
1685	18.6183	7263.05	7293.69	0	?	0	525	Calibration	-
1686	18.6293	7302.4	7296	0	?	0	525	Calibration	-
1687	18.6403	7344.23	7308.76	0	?	0	525	Calibration	-
1688	18.6514	7299.49	7306.31	0	?	0	525	Calibration	-
1689	18.6624	7307	7306.49	0	?	0	525	Calibration	-
1690	18.6735	7285.35	7300.9	0	?	0	525	Calibration	-
1691	18.6845	7317.12	7305.19	0	?	0	525	Calibration	-
1692	18.6956	7295.25	7302.56	0	?	0	525	Calibration	-
1693	18.7066	7300.34	7301.97	0	?	0	525	Calibration	-
1694	18.7176	7278.8	7295.84	0	?	0	525	Calibration	-
1695	18.7287	7315.59	7301.07	0	?	0	525	Calibration	-
1696	18.7397	7288.76	7297.81	0	?	0	525	Calibration	-
1697	18.7508	7253.14	7285.98	0	?	0	525	Calibration	-
1698	18.7618	7334.91	7298.93	0	?	0	525	Calibration	-
1699	18.7729	7383.3	7321.27	0	?	0	525	Calibration	-
1700	18.7839	7450.6	7355.5	0	?	0	525	Calibration	-
1701	18.7949	7440.83	7378.09	0	?	0	525	Calibration	-
1702	18.806	7428.81	7391.52	0	?	0	525	Calibration	-
1703	18.817	7417.68	7398.44	0	?	0	525	Calibration	-
1704	18.8281	7436.42	7408.49	0	?	0	525	Calibration	-
1705	18.8391	7396.55	7405.33	0	?	0	525	Calibration	-
1706	18.8502	7389.06	7401.03	0	?	0	525	Calibration	-
1707	18.8612	7340.79	7385.08	0	?	0	525	Calibration	-
1708	18.8722	7304	7363.62	0	?	0	525	Calibration	-
1709	18.8833	7270.98	7339.1	0	?	0	525	Calibration	-
1710	18.8943	7303.68	7329.72	0	?	0	525	Calibration	-
1711	18.9054	7322.58	7327.83	0	?	0	525	Calibration	-
1712	18.9164	7298.47	7320.06	0	?	0	525	Calibration	-
1713	18.9275	7285.21	7310.83	0	?	0	525	Calibration	-
1714	18.9385	7261.77	7297.85	0	?	0	525	Calibration	-
1715	18.9495	7272.8	7291.22	0	?	0	525	Calibration	-
1716	18.9606	7324.01	7299.9	0	?	0	525	Calibration	-
1717	18.9716	7312.1	7303.13	0	?	0	525	Calibration	-
1718	18.9827	7312.55	7305.62	0	?	0	525	Calibration	-
1719	18.9937	7327.31	7311.36	0	?	0	525	Calibration	-
1720	19.0048	7334.71	7317.54	0	?	0	525	Calibration	-
1721	19.0158	7330.5	7320.97	0	?	0	525	Calibration	-
1722	19.0268	7361.11	7331.6	0	?	0	525	Calibration	-
1723	19.0379	7315.76	7327.41	0	?	0	525	Calibration	-
1724	19.0489	7288.26	7317.04	0	?	0	525	Calibration	-
1725	19.06	7286	7308.83	0	?	0	525	Calibration	-
1726	19.071	7275.05	7299.89	0	?	0	525	Calibration	-
1727	19.0821	7318.62	7304.85	0	?	0	525	Calibration	-
1728	19.0931	7305.85	7305.11	0	?	0	525	Calibration	-
1729	19.1041	7287.69	7300.5	0	?	0	525	Calibration	-
1730	19.1152	7259.81	7289.73	0	?	0	525	Calibration	-
1731	19.1262	7297.38	7291.75	0	?	0	525	Calibration	-
1732	19.1373	7299.99	7293.93	0	?	0	525	Calibration	-
1733	19.1483	7303.15	7296.37	0	?	0	525	Calibration	-
1734	19.1594	7295.74	7296.2	0	?	0	525	Calibration	-
1735	19.1704	7286.65	7293.67	0	?	0	525	Calibration	-
1736	19.1814	7330.28	7303.36	0	?	0	525	Calibration	-
1737	19.1925	7347.42	7315.03	0	?	0	525	Calibration	-
1738	19.2035	7313.08	7314.51	0	?	0	525	Calibration	-
1739	19.2146	7293.91	7309.06	0	?	0	525	Calibration	-
1740	19.2256	7307.96	7308.77	0	?	0	525	Calibration	-
1741	19.2367	7310.23	7309.15	0	?	0	525	Calibration	-
1742	19.2477	7298.69	7306.38	0	?	0	525	Calibration	-
1743	19.2587	7336.25	7314.29	0	?	0	525	Calibration	-
1744	19.2698	7381.88	7332.18	0	?	0	525	Calibration	-
1745	19.2808	7355.15	7338.26	0	?	0	525	Calibration	-
1746	19.2919	7345.73	7340.24	0	?	0	525	Calibration	-
1747	19.3029	7365.23	7346.85	0	?	0	525	Calibration	-
1748	19.314	7389.89	7358.24	0	?	0	525	Calibration	-
1749	19.325	7383.06	7364.81	0	?	0	525	Calibration	-
1750	19.336	7353.86	7361.91	0	?	0	525	Calibration	-
1751	19.3471	7307.27	7347.45	0	?	0	525	Calibration	-
1752	19.3581	7328.67	7342.48	0	?	0	525	Calibration	-
1753	19.3692	7362.91	7347.89	0	?	0	525	Calibration	-
1754	19.3802	7321.03	7340.78	0	?	0	525	Calibration	-
1755	19.3913	7287	7326.54	0	?	0	525	Calibration	-
1756	19.4023	7306.54	7321.25	0	?	0	525	Calibration	-
1757	19.4133	7332.72	7324.28	0	?	0	525	Calibration	-
1758	19.4244	7297.9	7317.3	0	?	0	525	Calibration	-
1759	19.4354	7325.25	7319.4	0	?	0	525	Calibration	-
1760	19.4465	7334.86	7323.5	0	?	0	525	Calibration	-
1761	19.4575	7311.27	7320.26	0	?	0	525	Calibration	-
1762	19.4686	7331.48	7323.23	0	?	0	525	Calibration	-
1763	19.4796	7358.47	7332.56	0	?	0	525	Calibration	-
1764	19.4906	7353.53	7338.11	0	?	0	525	Calibration	-
1765	19.5017	7337.6	7337.98	0	?	0	525	Calibration	-
1766	19.5127	7322.02	7333.75	0	?	0	525	Calibration	-
1767	19.5238	7321.02	7330.38	0	?	0	525	Calibration	-
1768	19.5348	7349.34	7335.4	0	?	0	525	Calibration	-
1769	19.5459	7280.27	7320.81	0	?	0	525	Calibration	-
1770	19.5569	7245.66	7300.91	0	?	0	525	Calibration	-
1771	19.5679	7275.65	7294.23	0	?	0	525	Calibration	-
1772	19.579	7284.48	7291.65	0	?	0	525	Calibration	-
1773	19.59	7296.25	7292.86	0	?	0	525	Calibration	-
1774	19.6011	7231.53	7276.63	0	?	0	525	Calibration	-
1775	19.6121	7284.08	7278.6	0	?	0	525	Calibration	-
1776	19.6232	7287.18	7280.87	0	?	0	525	Calibration	-
1777	19.6342	7258.43	7274.93	0	?	0	525	Calibration	-
1778	19.6452	7271.5	7274.02	0	?	0	525	Calibration	-
1779	19.6563	7318.32	7285.75	0	?	0	525	Calibration	-
1780	19.6673	7371.47	7308.44	0	?	0	525	Calibration	-
1781	19.6784	7357.41	7321.4	0	?	0	525	Calibration	-
1782	19.6894	7322.82	7321.78	0	?	0	525	Calibration	-
1783	19.7005	7349.74	7329.18	0	?	0	525	Calibration	-
1784	19.7115	7352.45	7335.34	0	?	0	525	Calibration	-
1785	19.7225	7384.82	7348.44	0	?	0	525	Calibration	-
1786	19.7336	7391.86	7359.93	0	?	0	525	Calibration	-
1787	19.7446	7342.88	7355.42	0	?	0	525	Calibration	-
1788	19.7557	7305.08	7342.09	0	?	0	525	Calibration	-
1789	19.7667	7312.19	7334.18	0	?	0	525	Calibration	-
1790	19.7778	7290.31	7322.57	0	?	0	525	Calibration	-
1791	19.7888	7244.42	7301.88	0	?	0	525	Calibration	-
1792	19.7998	7277.86	7295.52	0	?	0	525	Calibration	-
1793	19.8109	7252.79	7284.21	0	?	0	525	Calibration	-
1794	19.8219	7270.34	7280.54	0	?	0	525	Calibration	-
1795	19.833	7305.91	7287.26	0	?	0	525	Calibration	-
1796	19.844	7315.14	7294.64	0	?	0	525	Calibration	-
1797	19.8551	7282.95	7291.54	0	?	0	525	Calibration	-
1798	19.8661	7330.76	7301.92	0	?	0	525	Calibration	-
1799	19.8771	7314.6	7305.28	0	?	0	525	Calibration	-
1800	19.8882	7319.32	7309	0	?	0	525	Calibration	-
1801	19.8992	7341.07	7317.49	0	?	0	525	Calibration	-
1802	19.9103	7341.77	7323.92	0	?	0	525	Calibration	-
1803	19.9213	7320.57	7323.03	0	?	0	525	Calibration	-
1804	19.9324	7341.81	7328	0	?	0	525	Calibration	-
1805	19.9434	7305.15	7321.95	0	?	0	525	Calibration	-
1806	19.9544	7305.25	7317.53	0	?	0	525	Calibration	-
1807	19.9655	7299.6	7312.79	0	?	0	525	Calibration	-
1808	19.9765	7346.95	7321.83	0	?	0	525	Calibration	-
1809	19.9876	7360.24	7332	0	?	0	525	Calibration	-
1810	19.9986	7349.61	7336.66	0	?	0	525	Calibration	-
1811	20.0097	7306.32	7328.63	0	?	0	525	Calibration	-
1812	20.0207	7302.77	7321.78	0	?	0	525	Calibration	-
1813	20.0317	7331.31	7324.31	0	?	0	525	Calibration	-
1814	20.0428	7300.56	7318.02	0	?	0	525	Calibration	-
1815	20.0538	7299.89	7313.22	0	?	0	525	Calibration	-
1816	20.0649	7333.52	7318.59	0	?	0	525	Calibration	-
1817	20.0759	7344.35	7325.41	0	?	0	525	Calibration	-
1818	20.087	7334.93	7327.93	0	?	0	525	Calibration	-
1819	20.098	7384.73	7342.97	0	?	0	525	Calibration	-
1820	20.109	7353.34	7345.71	0	?	0	525	Calibration	-
1821	20.1201	7316.34	7337.94	0	?	0	525	Calibration	-
1822	20.1311	7257.8	7316.73	0	?	0	525	Calibration	-
1823	20.1422	7243.62	7297.38	0	?	0	525	Calibration	-
1824	20.1532	7231.78	7280.01	0	?	0	525	Calibration	-
1825	20.1643	7289.69	7282.57	0	?	0	525	Calibration	-
1826	20.1753	7305.22	7288.57	0	?	0	525	Calibration	-
1827	20.1863	7315.86	7295.79	0	?	0	525	Calibration	-
1828	20.1974	7350.06	7310.16	0	?	0	525	Calibration	-
1829	20.2084	7367.55	7325.35	0	?	0	525	Bleach correction function: exp. offset = 1332.4443845026972 * exp(-0.0014205998335818336 * x) + 7211.161762313898	-
1830	20.2195	7367.29	7336.45	0	?	0	525	Calculating F0: 8518.124974340984	Step 1: 0.0 %
1831	20.2305	7384.33	7349.13	8589.32	-13.72	0.84	525	Hold. Current dF/F0 in tolerance range.	Step 1: 0.0 %
1832	20.2416	7326.74	7343.2	8582.56	-13.79	0.76	525	Current dF/F0 greater than holding dF/F0 (0.0 %). --> Change wavelength by 0.0 nm	Step 1: 0.0 %
1833	20.2526	7325.08	7338.41	8577.11	-13.85	0.69	525	Current dF/F0 greater than holding dF/F0 (0.0 %). --> Change wavelength by 0.0 nm	Step 1: 0.0 %
1834	20.2636	7273.72	7321.28	8557.27	-14.05	0.46	525	Current dF/F0 greater than holding dF/F0 (0.0 %). --> Change wavelength by 0.0 nm	Step 1: 0.0 %
1835	20.2747	7300.25	7315.71	8550.92	-14.12	0.39	525	Current dF/F0 greater than holding dF/F0 (0.0 %). --> Change wavelength by 0.0 nm	Step 1: 0.0 %
1836	20.2857	7338.36	7321.71	8558.09	-14.05	0.47	525	Current dF/F0 greater than holding dF/F0 (0.0 %). --> Change wavelength by 0.0 nm	Step 1: 0.0 %
1837	20.2968	7261.72	7305.83	8539.69	-14.23	0.25	525	Current dF/F0 greater than holding dF/F0 (0.0 %). --> Change wavelength by 0.0 nm	Step 1: 0.0 %
1838	20.3078	7281.21	7299.31	8532.24	-14.31	0.17	525	Current dF/F0 greater than holding dF/F0 (0.0 %). --> Change wavelength by 0.0 nm	Step 1: 0.0 %
1839	20.3189	7276.48	7293.27	8525.33	-14.38	0.08	525	Current dF/F0 greater than holding dF/F0 (0.0 %). --> Change wavelength by 0.0 nm	Step 1: 0.0 %
1840	20.3299	7241.83	7279.65	8509.58	-14.54	-0.1	525	Current dF/F0 greater than holding dF/F0 (0.0 %). --> Change wavelength by 0.0 nm	Step 1: 0.0 %
1841	20.3409	7224.67	7265.1	8492.73	-14.71	-0.3	525	Current dF/F0 smaller than holding dF/F0 (0.0 %). --> Change wavelength by 0.0 nm	Step 1: 0.0 %
1842	20.352	7276.53	7268.12	8496.43	-14.67	-0.25	525	Current dF/F0 smaller than holding dF/F0 (0.0 %). --> Change wavelength by 0.0 nm	Step 1: 0.0 %
1843	20.363	7274.62	7269.85	8498.6	-14.65	-0.23	525	Current dF/F0 smaller than holding dF/F0 (0.0 %). --> Change wavelength by 0.0 nm	Step 1: 0.0 %
1844	20.3741	7273.82	7270.9	8499.99	-14.64	-0.21	525	Current dF/F0 smaller than holding dF/F0 (0.0 %). --> Change wavelength by 0.0 nm	Step 1: 0.0 %
1845	20.3851	7277.36	7272.61	8502.15	-14.62	-0.19	525	Current dF/F0 smaller than holding dF/F0 (0.0 %). --> Change wavelength by 0.0 nm	Step 1: 0.0 %
1846	20.3962	7342.55	7291.12	8523.96	-14.4	0.07	525	Current dF/F0 smaller than holding dF/F0 (0.0 %). --> Change wavelength by 0.0 nm	Step 1: 0.0 %
1847	20.4072	7326.88	7300.59	8535.18	-14.29	0.2	525	Current dF/F0 greater than holding dF/F0 (0.0 %). --> Change wavelength by 0.0 nm	Step 1: 0.0 %
1848	20.4182	7340.03	7311.03	8547.55	-14.17	0.35	525	Current dF/F0 greater than holding dF/F0 (0.0 %). --> Change wavelength by 0.0 nm	Step 1: 0.0 %
1849	20.4293	7292.49	7306.12	8541.97	-14.23	0.28	525	Current dF/F0 greater than holding dF/F0 (0.0 %). --> Change wavelength by 0.0 nm	Step 1: 0.0 %
1850	20.4403	7297.85	7303.93	8539.57	-14.25	0.25	525	Current dF/F0 greater than holding dF/F0 (0.0 %). --> Change wavelength by 0.0 nm	Step 1: 0.0 %
1851	20.4514	7304.92	7304.19	8540.04	-14.25	0.26	525	Current dF/F0 greater than holding dF/F0 (0.0 %). --> Change wavelength by 0.0 nm	Step 1: 0.0 %
1852	20.4624	7291.38	7300.8	8536.23	-14.29	0.21	525	Current dF/F0 greater than holding dF/F0 (0.0 %). --> Change wavelength by 0.0 nm	Step 1: 0.0 %
1853	20.4735	7276.74	7294.43	8528.94	-14.37	0.13	525	Current dF/F0 greater than holding dF/F0 (0.0 %). --> Change wavelength by 0.0 nm	Step 1: 0.0 %
1854	20.4845	7294.94	7294.57	8529.26	-14.36	0.13	525	Current dF/F0 greater than holding dF/F0 (0.0 %). --> Change wavelength by 0.0 nm	Step 1: 0.0 %
1855	20.4955	7243.6	7281.08	8513.64	-14.52	-0.05	525	Current dF/F0 greater than holding dF/F0 (0.0 %). --> Change wavelength by 0.0 nm	Step 1: 0.0 %
1856	20.5066	7307.67	7288.11	8522.03	-14.44	0.05	525	Current dF/F0 smaller than holding dF/F0 (0.0 %). --> Change wavelength by 0.0 nm	Step 1: 0.0 %
1857	20.5176	7311.16	7294.21	8529.32	-14.37	0.13	525	Current dF/F0 greater than holding dF/F0 (0.0 %). --> Change wavelength by 0.0 nm	Step 1: 0.0 %
1858	20.5287	7273.38	7288.7	8523.03	-14.43	0.06	525	Current dF/F0 greater than holding dF/F0 (0.0 %). --> Change wavelength by 0.0 nm	Step 1: 0.0 %
1859	20.5397	7249.97	7278.45	8511.2	-14.55	-0.08	525	Current dF/F0 greater than holding dF/F0 (0.0 %). --> Change wavelength by 0.0 nm	Step 1: 0.0 %
1860	20.5508	7285.77	7280.38	8513.62	-14.53	-0.05	525	Current dF/F0 smaller than holding dF/F0 (0.0 %). --> Change wavelength by 0.0 nm	Step 1: 0.0 %
1861	20.5618	7267.55	7276.99	8509.81	-14.57	-0.1	525	Current dF/F0 smaller than holding dF/F0 (0.0 %). --> Change wavelength by 0.0 nm	Step 1: 0.0 %
1862	20.5728	7310.02	7285.73	8520.19	-14.47	0.02	525	Current dF/F0 smaller than holding dF/F0 (0.0 %). --> Change wavelength by 0.0 nm	Step 1: 0.0 %
1863	20.5839	7298.08	7289	8524.17	-14.43	0.07	525	Current dF/F0 greater than holding dF/F0 (0.0 %). --> Change wavelength by 0.0 nm	Step 1: 0.0 %
1864	20.5949	7306.16	7293.54	8529.63	-14.38	0.14	525	Current dF/F0 greater than holding dF/F0 (0.0 %). --> Change wavelength by 0.0 nm	Step 1: 0.0 %
1865	20.606	7305.54	7296.72	8533.51	-14.34	0.18	525	Current dF/F0 greater than holding dF/F0 (0.0 %). --> Change wavelength by 0.0 nm	Step 1: 0.0 %
1866	20.617	7286.6	7294.04	8530.53	-14.37	0.15	525	Current dF/F0 greater than holding dF/F0 (0.0 %). --> Change wavelength by 0.0 nm	Step 1: 0.0 %
1867	20.6281	7268.57	7287.3	8522.8	-14.45	0.05	525	Current dF/F0 greater than holding dF/F0 (0.0 %). --> Change wavelength by 0.0 nm	Step 1: 0.0 %
1868	20.6391	7234.23	7273.25	8506.53	-14.61	-0.14	525	Current dF/F0 greater than holding dF/F0 (0.0 %). --> Change wavelength by 0.0 nm	Step 1: 0.0 %
1869	20.6501	7234.97	7263.12	8494.83	-14.73	-0.27	525	Current dF/F0 smaller than holding dF/F0 (0.0 %). --> Change wavelength by 0.0 nm	Step 1: 0.0 %
1870	20.6612	7245.19	7258.37	8489.43	-14.79	-0.34	525	Current dF/F0 smaller than holding dF/F0 (0.0 %). --> Change wavelength by 0.0 nm	Step 1: 0.0 %
1871	20.6722	7306.76	7271.18	8504.57	-14.64	-0.16	525	Current dF/F0 smaller than holding dF/F0 (0.0 %). --> Change wavelength by 0.0 nm	Step 1: 0.0 %
1872	20.6833	7323.54	7285.04	8520.94	-14.48	0.03	525	Current dF/F0 smaller than holding dF/F0 (0.0 %). --> Change wavelength by 0.0 nm	Step 1: 0.0 %
1873	20.6943	7286.06	7285.31	8521.41	-14.47	0.04	525	Current dF/F0 greater than holding dF/F0 (0.0 %). --> Change wavelength by 0.0 nm	Step 1: 0.0 %
1874	20.7054	7297.95	7288.66	8525.47	-14.43	0.09	525	Current dF/F0 greater than holding dF/F0 (0.0 %). --> Change wavelength by 0.0 nm	Step 1: 0.0 %
1875	20.7164	7316.46	7296.02	8534.24	-14.35	0.19	525	Current dF/F0 greater than holding dF/F0 (0.0 %). --> Change wavelength by 0.0 nm	Step 1: 0.0 %
1876	20.7274	7261.76	7286.95	8523.78	-14.45	0.07	525	Current dF/F0 greater than holding dF/F0 (0.0 %). --> Change wavelength by 0.0 nm	Step 1: 0.0 %
1877	20.7385	7281.48	7285.5	8522.24	-14.47	0.05	525	Current dF/F0 greater than holding dF/F0 (0.0 %). --> Change wavelength by 0.0 nm	Step 1: 0.0 %
1878	20.7495	7294.74	7287.95	8525.26	-14.44	0.08	525	Current dF/F0 greater than holding dF/F0 (0.0 %). --> Change wavelength by 0.0 nm	Step 1: 0.0 %
1879	20.7606	7345.26	7303.12	8543.16	-14.26	0.29	525	Current dF/F0 greater than holding dF/F0 (0.0 %). --> Change wavelength by 0.0 nm	Step 1: 0.0 %
1880	20.7716	7311.66	7305.38	8545.96	-14.24	0.33	525	Current dF/F0 greater than holding dF/F0 (0.0 %). --> Change wavelength by 0.0 nm	Step 1: 0.0 %
1881	20.7827	7291.84	7301.8	8541.92	-14.28	0.28	525	Current dF/F0 greater than holding dF/F0 (0.0 %). --> Change wavelength by 0.0 nm	Step 1: 0.0 %
1882	20.7937	7301.02	7301.59	8541.83	-14.28	0.28	525	Current dF/F0 greater than holding dF/F0 (0.0 %). --> Change wavelength by 0.0 nm	Step 1: 0.0 %
1883	20.8047	7277.24	7295.14	8534.44	-14.36	0.19	525	Current dF/F0 greater than holding dF/F0 (0.0 %). --> Change wavelength by 0.0 nm	Step 1: 0.0 %
1884	20.8158	7292.11	7294.34	8533.66	-14.37	0.18	525	Current dF/F0 greater than holding dF/F0 (0.0 %). --> Change wavelength by 0.0 nm	Step 1: 0.0 %
1885	20.8268	7234.98	7278.63	8515.42	-14.55	-0.03	525	Current dF/F0 greater than holding dF/F0 (0.0 %). --> Change wavelength by 0.0 nm	Step 1: 0.0 %
1886	20.8379	7228.31	7265.31	8499.99	-14.71	-0.21	525	Current dF/F0 smaller than holding dF/F0 (0.0 %). --> Change wavelength by 0.0 nm	Step 1: 0.0 %
1887	20.8489	7254.61	7262.48	8496.83	-14.74	-0.25	525	Current dF/F0 smaller than holding dF/F0 (0.0 %). --> Change wavelength by 0.0 nm	Step 1: 0.0 %
1888	20.86	7318.27	7277.25	8514.26	-14.57	-0.05	525	Current dF/F0 smaller than holding dF/F0 (0.0 %). --> Change wavelength by 0.0 nm	Step 1: 0.0 %
1889	20.871	7352.4	7297.14	8537.69	-14.33	0.23	525	Current dF/F0 smaller than holding dF/F0 (0.0 %). --> Change wavelength by 0.0 nm	Step 1: 0.0 %
1890	20.882	7339.76	7308.42	8551.04	-14.2	0.39	525	Current dF/F0 greater than holding dF/F0 (0.0 %). --> Change wavelength by 0.0 nm	Step 1: 0.0 %
1891	20.8931	7329.3	7313.95	8557.66	-14.14	0.46	525	Current dF/F0 greater than holding dF/F0 (0.0 %). --> Change wavelength by 0.0 nm	Step 1: 0.0 %
1892	20.9041	7358.79	7325.82	8571.7	-14	0.63	525	Current dF/F0 greater than holding dF/F0 (0.0 %). --> Change wavelength by 0.0 nm	Step 1: 0.0 %
1893	20.9152	7283.4	7314.59	8558.71	-14.13	0.48	525	Current dF/F0 greater than holding dF/F0 (0.0 %). --> Change wavelength by 0.0 nm	Step 1: 0.0 %
1894	20.9262	7269.86	7302.75	8545.01	-14.27	0.32	525	Current dF/F0 greater than holding dF/F0 (0.0 %). --> Change wavelength by 0.0 nm	Step 1: 0.0 %
1895	20.9373	7243.29	7287.01	8526.74	-14.45	0.1	525	Current dF/F0 greater than holding dF/F0 (0.0 %). --> Change wavelength by 0.0 nm	Step 1: 0.0 %
1896	20.9483	7244.04	7275.64	8513.58	-14.59	-0.05	525	Current dF/F0 greater than holding dF/F0 (0.0 %). --> Change wavelength by 0.0 nm	Step 1: 0.0 %
1897	20.9593	7241.95	7266.72	8503.29	-14.69	-0.17	525	Current dF/F0 smaller than holding dF/F0 (0.0 %). --> Change wavelength by 0.0 nm	Step 1: 0.0 %
1898	20.9704	7260.31	7265.02	8501.46	-14.71	-0.2	525	Current dF/F0 smaller than holding dF/F0 (0.0 %). --> Change wavelength by 0.0 nm	Step 1: 0.0 %
1899	20.9814	7283.6	7269.94	8507.36	-14.65	-0.13	525	Current dF/F0 smaller than holding dF/F0 (0.0 %). --> Change wavelength by 0.0 nm	Step 1: 0.0 %
1900	20.9925	7256.99	7266.51	8503.5	-14.69	-0.17	525	Current dF/F0 smaller than holding dF/F0 (0.0 %). --> Change wavelength by 0.0 nm	Step 1: 0.0 %
1901	21.0035	7232.22	7257.44	8493.02	-14.8	-0.29	525	Current dF/F0 smaller than holding dF/F0 (0.0 %). --> Change wavelength by 0.0 nm	Step 1: 0.0 %
1902	21.0146	7216.33	7246.56	8480.44	-14.93	-0.44	525	Current dF/F0 smaller than holding dF/F0 (0.0 %). --> Change wavelength by 0.0 nm	Step 1: 0.0 %
1903	21.0256	7282.2	7255.99	8491.63	-14.82	-0.31	525	Current dF/F0 smaller than holding dF/F0 (0.0 %). --> Change wavelength by 0.0 nm	Step 1: 0.0 %
1904	21.0366	7323.49	7273.86	8512.69	-14.61	-0.06	525	Current dF/F0 smaller than holding dF/F0 (0.0 %). --> Change wavelength by 0.0 nm	Step 1: 0.0 %
1905	21.0477	7330.29	7288.8	8530.32	-14.43	0.14	525	Current dF/F0 smaller than holding dF/F0 (0.0 %). --> Change wavelength by 0.0 nm	Step 1: 0.0 %
1906	21.0587	7301.61	7292.19	8534.43	-14.39	0.19	525	Current dF/F0 greater than holding dF/F0 (0.0 %). --> Change wavelength by 0.0 nm	Step 1: 0.0 %
1907	21.0698	7281.71	7289.41	8531.34	-14.42	0.16	525	Current dF/F0 greater than holding dF/F0 (0.0 %). --> Change wavelength by 0.0 nm	Step 1: 0.0 %
1908	21.0808	7231.67	7274.13	8513.59	-14.6	-0.05	525	Current dF/F0 greater than holding dF/F0 (0.0 %). --> Change wavelength by 0.0 nm	Step 1: 0.0 %
1909	21.0919	7278.98	7275.41	8515.24	-14.59	-0.03	525	Current dF/F0 smaller than holding dF/F0 (0.0 %). --> Change wavelength by 0.0 nm	Step 1: 0.0 %
1910	21.1029	7272.44	7274.63	8514.47	-14.6	-0.04	525	Current dF/F0 smaller than holding dF/F0 (0.0 %). --> Change wavelength by 0.0 nm	Step 1: 0.0 %
1911	21.1139	7294.04	7279.76	8520.63	-14.54	0.03	525	Current dF/F0 smaller than holding dF/F0 (0.0 %). --> Change wavelength by 0.0 nm	Step 1: 0.0 %
1912	21.125	7291.65	7282.91	8524.46	-14.5	0.07	525	Current dF/F0 greater than holding dF/F0 (0.0 %). --> Change wavelength by 0.0 nm	Step 1: 0.0 %
1913	21.136	7272.97	7280.28	8521.52	-14.53	0.04	525	Current dF/F0 greater than holding dF/F0 (0.0 %). --> Change wavelength by 0.0 nm	Step 1: 0.0 %
1914	21.1471	7293.81	7283.86	8525.86	-14.49	0.09	525	Current dF/F0 greater than holding dF/F0 (0.0 %). --> Change wavelength by 0.0 nm	Step 1: 0.0 %
1915	21.1581	7263.67	7278.52	8519.75	-14.55	0.02	525	Current dF/F0 greater than holding dF/F0 (0.0 %). --> Change wavelength by 0.0 nm	Step 1: 0.0 %
1916	21.1692	7265.09	7274.96	8515.74	-14.59	-0.03	525	Current dF/F0 greater than holding dF/F0 (0.0 %). --> Change wavelength by 0.0 nm	Step 1: 0.0 %
1917	21.1802	7304.23	7282.71	8524.95	-14.5	0.08	525	Current dF/F0 smaller than holding dF/F0 (0.0 %). --> Change wavelength by 0.0 nm	Step 1: 0.0 %
1918	21.1912	7352.39	7301.15	8546.68	-14.29	0.34	525	Current dF/F0 greater than holding dF/F0 (0.0 %). --> Change wavelength by 0.0 nm	Step 1: 0.0 %
1919	21.2023	7337.47	7310.77	8558.08	-14.17	0.47	525	Current dF/F0 greater than holding dF/F0 (0.0 %). --> Change wavelength by 0.0 nm	Step 1: 0.0 %
1920	21.2133	7269.98	7299.97	8545.59	-14.3	0.32	525	Current dF/F0 greater than holding dF/F0 (0.0 %). --> Change wavelength by 0.0 nm	Step 1: 0.0 %
1921	21.2244	7212.39	7276.79	8518.59	-14.57	0.01	525	Current dF/F0 greater than holding dF/F0 (0.0 %). --> Change wavelength by 0.0 nm	Step 1: 0.0 %
1922	21.2354	7244.75	7268.31	8508.81	-14.67	-0.11	525	Current dF/F0 greater than holding dF/F0 (0.0 %). --> Change wavelength by 0.0 nm	Step 1: 0.0 %
1923	21.2465	7218.96	7255.24	8493.66	-14.83	-0.29	525	Current dF/F0 smaller than holding dF/F0 (0.0 %). --> Change wavelength by 0.0 nm	Step 1: 0.0 %
1924	21.2575	7217.12	7245.15	8481.99	-14.94	-0.42	525	Current dF/F0 smaller than holding dF/F0 (0.0 %). --> Change wavelength by 0.0 nm	Step 1: 0.0 %
1925	21.2685	7292.78	7257.76	8496.9	-14.8	-0.25	525	Current dF/F0 smaller than holding dF/F0 (0.0 %). --> Change wavelength by 0.0 nm	Step 1: 0.0 %
1926	21.2796	7278.82	7263.34	8503.57	-14.73	-0.17	525	Current dF/F0 smaller than holding dF/F0 (0.0 %). --> Change wavelength by 0.0 nm	Step 1: 0.0 %
1927	21.2906	7268.56	7264.72	8505.33	-14.71	-0.15	525	Current dF/F0 smaller than holding dF/F0 (0.0 %). --> Change wavelength by 0.0 nm	Step 1: 0.0 %
1928	21.3017	7238.16	7257.69	8497.24	-14.8	-0.25	525	Current dF/F0 smaller than holding dF/F0 (0.0 %). --> Change wavelength by 0.0 nm	Step 1: 0.0 %
1929	21.3127	7292.41	7266.88	8508.14	-14.69	-0.12	525	Current dF/F0 smaller than holding dF/F0 (0.0 %). --> Change wavelength by 0.0 nm	Step 1: 0.0 %
1930	21.3238	7299.27	7275.45	8518.32	-14.59	0	525	Current dF/F0 smaller than holding dF/F0 (0.0 %). --> Change wavelength by 0.0 nm	Step 1: 0.0 %
1931	21.3348	7276.02	7275.6	8518.64	-14.59	0.01	525	Current dF/F0 greater than holding dF/F0 (0.0 %). --> Change wavelength by 0.0 nm	Step 1: 0.0 %
1932	21.3458	7270.23	7274.18	8517.12	-14.6	-0.01	525	Current dF/F0 greater than holding dF/F0 (0.0 %). --> Change wavelength by 0.0 nm	Step 1: 0.0 %
1933	21.3569	7270.39	7273.18	8516.08	-14.62	-0.02	525	Current dF/F0 smaller than holding dF/F0 (0.0 %). --> Change wavelength by 0.0 nm	Step 1: 0.0 %
1934	21.3679	7294.82	7278.91	8522.93	-14.55	0.06	525	Current dF/F0 smaller than holding dF/F0 (0.0 %). --> Change wavelength by 0.0 nm	Step 1: 0.0 %
1935	21.379	7239.69	7268.52	8510.92	-14.67	-0.08	525	Current dF/F0 greater than holding dF/F0 (0.0 %). --> Change wavelength by 0.0 nm	Step 1: 0.0 %
1936	21.39	7231.16	7258.63	8499.48	-14.79	-0.22	525	Current dF/F0 smaller than holding dF/F0 (0.0 %). --> Change wavelength by 0.0 nm	Step 1: 0.0 %
1937	21.4011	7251.05	7256.63	8497.27	-14.81	-0.24	525	Current dF/F0 smaller than holding dF/F0 (0.0 %). --> Change wavelength by 0.0 nm	Step 1: 0.0 %
1938	21.4121	7316.59	7272.5	8516	-14.62	-0.02	525	Current dF/F0 smaller than holding dF/F0 (0.0 %). --> Change wavelength by 0.0 nm	Step 1: 0.0 %
1939	21.4231	7290.55	7277.28	8521.73	-14.57	0.04	525	Current dF/F0 smaller than holding dF/F0 (0.0 %). --> Change wavelength by 0.0 nm	Step 1: 0.0 %
1940	21.4342	7267.01	7274.56	8518.69	-14.6	0.01	525	Current dF/F0 greater than holding dF/F0 (0.0 %). --> Change wavelength by 0.0 nm	Step 1: 0.0 %
1941	21.4452	7293.35	7279.54	8524.66	-14.54	0.08	525	Current dF/F0 greater than holding dF/F0 (0.0 %). --> Change wavelength by 0.0 nm	Step 1: 0.0 %
1942	21.4563	7266.1	7275.98	8520.64	-14.58	0.03	525	Current dF/F0 greater than holding dF/F0 (0.0 %). --> Change wavelength by 0.0 nm	Step 1: 0.0 %
1943	21.4673	7242.12	7267.02	8510.28	-14.69	-0.09	525	Current dF/F0 greater than holding dF/F0 (0.0 %). --> Change wavelength by 0.0 nm	Step 1: 0.0 %
1944	21.4784	7236.61	7258.97	8501	-14.78	-0.2	525	Current dF/F0 smaller than holding dF/F0 (0.0 %). --> Change wavelength by 0.0 nm	Step 1: 0.0 %
1945	21.4894	7218.39	7248.23	8488.55	-14.91	-0.35	525	Current dF/F0 smaller than holding dF/F0 (0.0 %). --> Change wavelength by 0.0 nm	Step 1: 0.0 %
1946	21.5004	7253.2	7249.54	8490.23	-14.89	-0.33	525	Current dF/F0 smaller than holding dF/F0 (0.0 %). --> Change wavelength by 0.0 nm	Step 1: 0.0 %
1947	21.5115	7292.16	7260.82	8503.58	-14.76	-0.17	525	Current dF/F0 smaller than holding dF/F0 (0.0 %). --> Change wavelength by 0.0 nm	Step 1: 0.0 %
1948	21.5225	7311.43	7274.22	8519.41	-14.6	0.02	525	Current dF/F0 smaller than holding dF/F0 (0.0 %). --> Change wavelength by 0.0 nm	Step 1: 0.0 %
1949	21.5336	7265.36	7271.87	8516.8	-14.63	-0.02	525	Current dF/F0 greater than holding dF/F0 (0.0 %). --> Change wavelength by 0.0 nm	Step 1: 0.0 %
1950	21.5446	7229.17	7260.57	8503.7	-14.76	-0.17	525	Current dF/F0 smaller than holding dF/F0 (0.0 %). --> Change wavelength by 0.0 nm	Step 1: 0.0 %
1951	21.5557	7219.95	7249.82	8491.24	-14.89	-0.32	525	Current dF/F0 smaller than holding dF/F0 (0.0 %). --> Change wavelength by 0.0 nm	Step 1: 0.0 %
1952	21.5667	7275.92	7256.73	8499.47	-14.81	-0.22	525	Current dF/F0 smaller than holding dF/F0 (0.0 %). --> Change wavelength by 0.0 nm	Step 1: 0.0 %
1953	21.5777	7288.67	7265.18	8509.52	-14.71	-0.1	525	Current dF/F0 smaller than holding dF/F0 (0.0 %). --> Change wavelength by 0.0 nm	Step 1: 0.0 %
1954	21.5888	7292.92	7272.52	8518.25	-14.62	0	525	Current dF/F0 smaller than holding dF/F0 (0.0 %). --> Change wavelength by 0.0 nm	Step 1: 0.0 %
1955	21.5998	7259.55	7269.09	8514.37	-14.66	-0.04	525	Current dF/F0 greater than holding dF/F0 (0.0 %). --> Change wavelength by 0.0 nm	Step 1: 0.0 %
1956	21.6109	7314.08	7281	8528.46	-14.52	0.12	525	Current dF/F0 smaller than holding dF/F0 (0.0 %). --> Change wavelength by 0.0 nm	Step 1: 0.0 %
1957	21.6219	7284.11	7281.82	8529.56	-14.51	0.13	525	Current dF/F0 greater than holding dF/F0 (0.0 %). --> Change wavelength by 0.0 nm	Step 1: 0.0 %
1958	21.633	7266.46	7277.76	8524.93	-14.56	0.08	525	Current dF/F0 greater than holding dF/F0 (0.0 %). --> Change wavelength by 0.0 nm	Step 1: 0.0 %
1959	21.644	7259.3	7272.87	8519.35	-14.62	0.01	525	Current dF/F0 greater than holding dF/F0 (0.0 %). --> Change wavelength by 0.0 nm	Step 1: 0.0 %
1960	21.655	7247.92	7266.27	8511.75	-14.7	-0.07	525	Current dF/F0 greater than holding dF/F0 (0.0 %). --> Change wavelength by 0.0 nm	Step 1: 0.0 %
1961	21.6661	7244.67	7260.55	8505.19	-14.76	-0.15	525	Current dF/F0 smaller than holding dF/F0 (0.0 %). --> Change wavelength by 0.0 nm	Step 1: 0.0 %
1962	21.6771	7245.36	7256.53	8500.61	-14.81	-0.21	525	Current dF/F0 smaller than holding dF/F0 (0.0 %). --> Change wavelength by 0.0 nm	Step 1: 0.0 %
1963	21.6882	7288.66	7265.03	8510.71	-14.71	-0.09	525	Current dF/F0 smaller than holding dF/F0 (0.0 %). --> Change wavelength by 0.0 nm	Step 1: 0.0 %
1964	21.6992	7255.98	7262.64	8508.04	-14.74	-0.12	525	Current dF/F0 smaller than holding dF/F0 (0.0 %). --> Change wavelength by 0.0 nm	Step 1: 0.0 %
1965	21.7103	7234.2	7255.11	8499.36	-14.83	-0.22	525	Current dF/F0 smaller than holding dF/F0 (0.0 %). --> Change wavelength by 0.0 nm	Step 1: 0.0 %
1966	21.7213	7242.57	7251.79	8495.6	-14.87	-0.26	525	Current dF/F0 smaller than holding dF/F0 (0.0 %). --> Change wavelength by 0.0 nm	Step 1: 0.0 %
1967	21.7323	7288.8	7261.59	8507.22	-14.75	-0.13	525	Current dF/F0 smaller than holding dF/F0 (0.0 %). --> Change wavelength by 0.0 nm	Step 1: 0.0 %
1968	21.7434	7265.11	7262.52	8508.44	-14.74	-0.11	525	Current dF/F0 smaller than holding dF/F0 (0.0 %). --> Change wavelength by 0.0 nm	Step 1: 0.0 %
1969	21.7544	7296.01	7271.39	8518.97	-14.64	0.01	525	Current dF/F0 smaller than holding dF/F0 (0.0 %). --> Change wavelength by 0.0 nm	Step 1: 0.0 %
1970	21.7655	7298.9	7278.67	8527.63	-14.55	0.11	525	Current dF/F0 greater than holding dF/F0 (0.0 %). --> Change wavelength by 0.0 nm	Step 1: 0.0 %
1971	21.7765	7243.16	7269.27	8516.75	-14.66	-0.02	525	Current dF/F0 greater than holding dF/F0 (0.0 %). --> Change wavelength by 0.0 nm	Step 1: 0.0 %
1972	21.7876	7273.23	7270.32	8518.12	-14.65	0	525	Current dF/F0 smaller than holding dF/F0 (0.0 %). --> Change wavelength by 0.0 nm	Step 1: 0.0 %
1973	21.7986	7243.77	7263.29	8510.02	-14.73	-0.1	525	Current dF/F0 smaller than holding dF/F0 (0.0 %). --> Change wavelength by 0.0 nm	Step 1: 0.0 %
1974	21.8096	7218.78	7251.51	8496.35	-14.87	-0.26	525	Current dF/F0 smaller than holding dF/F0 (0.0 %). --> Change wavelength by 0.0 nm	Step 1: 0.0 %
1975	21.8207	7229.59	7245.71	8489.68	-14.94	-0.33	525	Current dF/F0 smaller than holding dF/F0 (0.0 %). --> Change wavelength by 0.0 nm	Step 1: 0.0 %
1976	21.8317	7260.42	7249.6	8494.38	-14.89	-0.28	525	Current dF/F0 smaller than holding dF/F0 (0.0 %). --> Change wavelength by 0.0 nm	Step 1: 0.0 %
1977	21.8428	7218.07	7241.26	8484.73	-14.99	-0.39	525	Current dF/F0 smaller than holding dF/F0 (0.0 %). --> Change wavelength by 0.0 nm	Step 1: 0.0 %
1978	21.8538	7222.15	7236.2	8478.94	-15.05	-0.46	525	Current dF/F0 smaller than holding dF/F0 (0.0 %). --> Change wavelength by 0.0 nm	Step 1: 0.0 %
1979	21.8649	7216.33	7230.94	8472.91	-15.11	-0.53	525	Current dF/F0 smaller than holding dF/F0 (0.0 %). --> Change wavelength by 0.0 nm	Step 1: 0.0 %
1980	21.8759	7247.82	7235.41	8478.28	-15.06	-0.47	525	Current dF/F0 smaller than holding dF/F0 (0.0 %). --> Change wavelength by 0.0 nm	Step 1: 0.0 %
1981	21.8869	7264.12	7243.01	8487.32	-14.97	-0.36	525	Current dF/F0 smaller than holding dF/F0 (0.0 %). --> Change wavelength by 0.0 nm	Step 1: 0.0 %
1982	21.898	7283.9	7253.83	8500.13	-14.84	-0.21	525	Current dF/F0 smaller than holding dF/F0 (0.0 %). --> Change wavelength by 0.0 nm	Step 1: 0.0 %
1983	21.909	7253.05	7253.63	8500.02	-14.84	-0.21	525	Current dF/F0 smaller than holding dF/F0 (0.0 %). --> Change wavelength by 0.0 nm	Step 1: 0.0 %
1984	21.9201	7275.22	7259.34	8506.85	-14.78	-0.13	525	Current dF/F0 smaller than holding dF/F0 (0.0 %). --> Change wavelength by 0.0 nm	Step 1: 0.0 %
1985	21.9311	7252.2	7257.45	8504.77	-14.8	-0.16	525	Current dF/F0 smaller than holding dF/F0 (0.0 %). --> Change wavelength by 0.0 nm	Step 1: 0.0 %
1986	21.9422	7302.17	7269.29	8518.77	-14.66	0.01	525	Current dF/F0 smaller than holding dF/F0 (0.0 %). --> Change wavelength by 0.0 nm	Step 1: 0.0 %
1987	21.9532	7255.88	7265.74	8514.74	-14.7	-0.04	525	Current dF/F0 greater than holding dF/F0 (0.0 %). --> Change wavelength by 0.0 nm	Step 1: 0.0 %
1988	21.9642	7198.14	7247.84	8493.9	-14.91	-0.28	525	Current dF/F0 smaller than holding dF/F0 (0.0 %). --> Change wavelength by 0.0 nm	Step 1: 0.0 %
1989	21.9753	7190.44	7232.65	8476.23	-15.09	-0.49	525	Current dF/F0 smaller than holding dF/F0 (0.0 %). --> Change wavelength by 0.0 nm	Step 1: 0.0 %
1990	21.9863	7166.66	7215.18	8455.88	-15.3	-0.73	525	Current dF/F0 smaller than holding dF/F0 (0.0 %). --> Change wavelength by 0.0 nm	Step 1: 0.0 %
1991	21.9974	7199.53	7211.04	8451.16	-15.34	-0.79	525	Current dF/F0 smaller than holding dF/F0 (0.0 %). --> Change wavelength by 0.0 nm	Step 1: 0.0 %
1992	22.0084	7194.98	7206.79	8446.31	-15.39	-0.84	525	Current dF/F0 smaller than holding dF/F0 (0.0 %). --> Change wavelength by 0.0 nm	Step 1: 0.0 %
[truncated: 527 more rows]

## Sheet: ED Figure 2E
Time	dF/F0_bleach_correct	Wavelength	dF/F0_bleach_correct	Wavelength	dF/F0_bleach_correct	Wavelength	dF/F0_bleach_correct	Wavelength	dF/F0_bleach_correct	Wavelength	dF/F0_bleach_correct	Wavelength	dF/F0_bleach_correct	Wavelength	dF/F0_bleach_correct	Wavelength	Mean DF/F0	SEM	Mean wavelength	SEM
0.011	0	535	0	525	0	525	0	535	0	530	0	525	0	535	0	530	0	0	530	1.63663
0.0221	0	535	0	525	0	525	0	535	0	530	0	525	0	535	0	530	0	0	530	1.63663
0.0331	0	535	0	525	0	525	0	535	0	530	0	525	0	535	0	530	0	0	530	1.63663
0.0442	0	535	0	525	0	525	0	535	0	530	0	525	0	535	0	530	0	0	530	1.63663
0.0552	0	535	0	525	0	525	0	535	0	530	0	525	0	535	0	530	0	0	530	1.63663
0.0663	0	535	0	525	0	525	0	535	0	530	0	525	0	535	0	530	0	0	530	1.63663
0.0773	0	535	0	525	0	525	0	535	0	530	0	525	0	535	0	530	0	0	530	1.63663
0.0883	0	535	0	525	0	525	0	535	0	530	0	525	0	535	0	530	0	0	530	1.63663
0.0994	0	535	0	525	0	525	0	535	0	530	0	525	0	535	0	530	0	0	530	1.63663
0.1104	0	535	0	525	0	525	0	535	0	530	0	525	0	535	0	530	0	0	530	1.63663
0.1215	0	535	0	525	0	525	0	535	0	530	0	525	0	535	0	530	0	0	530	1.63663
0.1325	0	535	0	525	0	525	0	535	0	530	0	525	0	535	0	530	0	0	530	1.63663
0.1436	0	535	0	525	0	525	0	535	0	530	0	525	0	535	0	530	0	0	530	1.63663
0.1546	0	535	0	525	0	525	0	535	0	530	0	525	0	535	0	530	0	0	530	1.63663
0.1656	0	535	0	525	0	525	0	535	0	530	0	525	0	535	0	530	0	0	530	1.63663
0.1767	0	535	0	525	0	525	0	535	0	530	0	525	0	535	0	530	0	0	530	1.63663
0.1877	0	535	0	525	0	525	0	535	0	530	0	525	0	535	0	530	0	0	530	1.63663
0.1988	0	535	0	525	0	525	0	535	0	530	0	525	0	535	0	530	0	0	530	1.63663
0.2098	0	535	0	525	0	525	0	535	0	530	0	525	0	535	0	530	0	0	530	1.63663
0.2209	0	535	0	525	0	525	0	535	0	530	0	525	0	535	0	530	0	0	530	1.63663
0.2319	0	535	0	525	0	525	0	535	0	530	0	525	0	535	0	530	0	0	530	1.63663
0.2429	0	535	0	525	0	525	0	535	0	530	0	525	0	535	0	530	0	0	530	1.63663
0.254	0	535	0	525	0	525	0	535	0	530	0	525	0	535	0	530	0	0	530	1.63663
0.265	0	535	0	525	0	525	0	535	0	530	0	525	0	535	0	530	0	0	530	1.63663
0.2761	0	535	0	525	0	525	0	535	0	530	0	525	0	535	0	530	0	0	530	1.63663
0.2871	0	535	0	525	0	525	0	535	0	530	0	525	0	535	0	530	0	0	530	1.63663
0.2982	0	535	0	525	0	525	0	535	0	530	0	525	0	535	0	530	0	0	530	1.63663
0.3092	0	535	0	525	0	525	0	535	0	530	0	525	0	535	0	530	0	0	530	1.63663
0.3202	0	535	0	525	0	525	0	535	0	530	0	525	0	535	0	530	0	0	530	1.63663
0.3313	0	535	0	525	0	525	0	535	0	530	0	525	0	535	0	530	0	0	530	1.63663
0.3423	0	535	0	525	0	525	0	535	0	530	0	525	0	535	0	530	0	0	530	1.63663
0.3534	0	535	0	525	0	525	0	535	0	530	0	525	0	535	0	530	0	0	530	1.63663
0.3644	0	535	0	525	0	525	0	535	0	530	0	525	0	535	0	530	0	0	530	1.63663
0.3755	0	535	0	525	0	525	0	535	0	530	0	525	0	535	0	530	0	0	530	1.63663
0.3865	0	535	0	525	0	525	0	535	0	530	0	525	0	535	0	530	0	0	530	1.63663
0.3975	0	535	0	525	0	525	0	535	0	530	0	525	0	535	0	530	0	0	530	1.63663
0.4086	0	535	0	525	0	525	0	535	0	530	0	525	0	535	0	530	0	0	530	1.63663
0.4196	0	535	0	525	0	525	0	535	0	530	0	525	0	535	0	530	0	0	530	1.63663
0.4307	0	535	0	525	0	525	0	535	0	530	0	525	0	535	0	530	0	0	530	1.63663
0.4417	0	535	0	525	0	525	0	535	0	530	0	525	0	535	0	530	0	0	530	1.63663
0.4528	0	535	0	525	0	525	0	535	0	530	0	525	0	535	0	530	0	0	530	1.63663
0.4638	0	535	0	525	0	525	0	535	0	530	0	525	0	535	0	530	0	0	530	1.63663
0.4748	0	535	0	525	0	525	0	535	0	530	0	525	0	535	0	530	0	0	530	1.63663
0.4859	0	535	0	525	0	525	0	535	0	530	0	525	0	535	0	530	0	0	530	1.63663
0.4969	0	535	0	525	0	525	0	535	0	530	0	525	0	535	0	530	0	0	530	1.63663
0.508	0	535	0	525	0	525	0	535	0	530	0	525	0	535	0	530	0	0	530	1.63663
0.519	0	535	0	525	0	525	0	535	0	530	0	525	0	535	0	530	0	0	530	1.63663
0.5301	0	535	0	525	0	525	0	535	0	530	0	525	0	535	0	530	0	0	530	1.63663
0.5411	0	535	0	525	0	525	0	535	0	530	0	525	0	535	0	530	0	0	530	1.63663
0.5521	0	535	0	525	0	525	0	535	0	530	0	525	0	535	0	530	0	0	530	1.63663
0.5632	0	535	0	525	0	525	0	535	0	530	0	525	0	535	0	530	0	0	530	1.63663
0.5742	0	535	0	525	0	525	0	535	0	530	0	525	0	535	0	530	0	0	530	1.63663
0.5853	0	535	0	525	0	525	0	535	0	530	0	525	0	535	0	530	0	0	530	1.63663
0.5963	0	535	0	525	0	525	0	535	0	530	0	525	0	535	0	530	0	0	530	1.63663
0.6074	0	535	0	525	0	525	0	535	0	530	0	525	0	535	0	530	0	0	530	1.63663
0.6184	0	535	0	525	0	525	0	535	0	530	0	525	0	535	0	530	0	0	530	1.63663
0.6294	0	535	0	525	0	525	0	535	0	530	0	525	0	535	0	530	0	0	530	1.63663
0.6405	0	535	0	525	0	525	0	535	0	530	0	525	0	535	0	530	0	0	530	1.63663
0.6515	0	535	0	525	0	525	0	535	0	530	0	525	0	535	0	530	0	0	530	1.63663
0.6626	0	535	0	525	0	525	0	535	0	530	0	525	0	535	0	530	0	0	530	1.63663
0.6736	0	535	0	525	0	525	0	535	0	530	0	525	0	535	0	530	0	0	530	1.63663
0.6847	0	535	0	525	0	525	0	535	0	530	0	525	0	535	0	530	0	0	530	1.63663
0.6957	0	535	0	525	0	525	0	535	0	530	0	525	0	535	0	530	0	0	530	1.63663
0.7067	0	535	0	525	0	525	0	535	0	530	0	525	0	535	0	530	0	0	530	1.63663
0.7178	0	535	0	525	0	525	0	535	0	530	0	525	0	535	0	530	0	0	530	1.63663
0.7288	0	535	0	525	0	525	0	535	0	530	0	525	0	535	0	530	0	0	530	1.63663
0.7399	0	535	0	525	0	525	0	535	0	530	0	525	0	535	0	530	0	0	530	1.63663
0.7509	0	535	0	525	0	525	0	535	0	530	0	525	0	535	0	530	0	0	530	1.63663
0.762	0	535	0	525	0	525	0	535	0	530	0	525	0	535	0	530	0	0	530	1.63663
0.773	0	535	0	525	0	525	0	535	0	530	0	525	0	535	0	530	0	0	530	1.63663
0.784	0	535	0	525	0	525	0	535	0	530	0	525	0	535	0	530	0	0	530	1.63663
0.7951	0	535	0	525	0	525	0	535	0	530	0	525	0	535	0	530	0	0	530	1.63663
0.8061	0	535	0	525	0	525	0	535	0	530	0	525	0	535	0	530	0	0	530	1.63663
0.8172	0	535	0	525	0	525	0	535	0	530	0	525	0	535	0	530	0	0	530	1.63663
0.8282	0	535	0	525	0	525	0	535	0	530	0	525	0	535	0	530	0	0	530	1.63663
0.8393	0	535	0	525	0	525	0	535	0	530	0	525	0	535	0	530	0	0	530	1.63663
0.8503	0	535	0	525	0	525	0	535	0	530	0	525	0	535	0	530	0	0	530	1.63663
0.8613	0	535	0	525	0	525	0	535	0	530	0	525	0	535	0	530	0	0	530	1.63663
0.8724	0	535	0	525	0	525	0	535	0	530	0	525	0	535	0	530	0	0	530	1.63663
0.8834	0	535	0	525	0	525	0	535	0	530	0	525	0	535	0	530	0	0	530	1.63663
0.8945	0	535	0	525	0	525	0	535	0	530	0	525	0	535	0	530	0	0	530	1.63663
0.9055	0	535	0	525	0	525	0	535	0	530	0	525	0	535	0	530	0	0	530	1.63663
0.9166	0	535	0	525	0	525	0	535	0	530	0	525	0	535	0	530	0	0	530	1.63663
0.9276	0	535	0	525	0	525	0	535	0	530	0	525	0	535	0	530	0	0	530	1.63663
0.9386	0	535	0	525	0	525	0	535	0	530	0	525	0	535	0	530	0	0	530	1.63663
0.9497	0	535	0	525	0	525	0	535	0	530	0	525	0	535	0	530	0	0	530	1.63663
0.9607	0	535	0	525	0	525	0	535	0	530	0	525	0	535	0	530	0	0	530	1.63663
0.9718	0	535	0	525	0	525	0	535	0	530	0	525	0	535	0	530	0	0	530	1.63663
0.9828	0	535	0	525	0	525	0	535	0	530	0	525	0	535	0	530	0	0	530	1.63663
0.9939	0	535	0	525	0	525	0	535	0	530	0	525	0	535	0	530	0	0	530	1.63663
1.0049	0	535	0	525	0	525	0	535	0	530	0	525	0	535	0	530	0	0	530	1.63663
1.0159	0	535	0	525	0	525	0	535	0	530	0	525	0	535	0	530	0	0	530	1.63663
1.027	0	535	0	525	0	525	0	535	0	530	0	525	0	535	0	530	0	0	530	1.63663
1.038	0	535	0	525	0	525	0	535	0	530	0	525	0	535	0	530	0	0	530	1.63663
1.0491	0	535	0	525	0	525	0	535	0	530	0	525	0	535	0	530	0	0	530	1.63663
1.0601	0	535	0	525	0	525	0	535	0	530	0	525	0	535	0	530	0	0	530	1.63663
1.0712	0	535	0	525	0	525	0	535	0	530	0	525	0	535	0	530	0	0	530	1.63663
1.0822	0	535	0	525	0	525	0	535	0	530	0	525	0	535	0	530	0	0	530	1.63663
1.0932	0	535	0	525	0	525	0	535	0	530	0	525	0	535	0	530	0	0	530	1.63663
1.1043	0	535	0	525	0	525	0	535	0	530	0	525	0	535	0	530	0	0	530	1.63663
1.1153	0	535	0	525	0	525	0	535	0	530	0	525	0	535	0	530	0	0	530	1.63663
1.1264	0	535	0	525	0	525	0	535	0	530	0	525	0	535	0	530	0	0	530	1.63663
1.1374	0	535	0	525	0	525	0	535	0	530	0	525	0	535	0	530	0	0	530	1.63663
1.1485	0	535	0	525	0	525	0	535	0	530	0	525	0	535	0	530	0	0	530	1.63663
1.1595	0	535	0	525	0	525	0	535	0	530	0	525	0	535	0	530	0	0	530	1.63663
1.1705	0	535	0	525	0	525	0	535	0	530	0	525	0	535	0	530	0	0	530	1.63663
1.1816	0	535	0	525	0	525	0	535	0	530	0	525	0	535	0	530	0	0	530	1.63663
1.1926	0	535	0	525	0	525	0	535	0	530	0	525	0	535	0	530	0	0	530	1.63663
1.2037	0	535	0	525	0	525	0	535	0	530	0	525	0	535	0	530	0	0	530	1.63663
1.2147	0	535	0	525	0	525	0	535	0	530	0	525	0	535	0	530	0	0	530	1.63663
1.2258	0	535	0	525	0	525	0	535	0	530	0	525	0	535	0	530	0	0	530	1.63663
1.2368	0	535	0	525	0	525	0	535	0	530	0	525	0	535	0	530	0	0	530	1.63663
1.2478	0	535	0	525	0	525	0	535	0	530	0	525	0	535	0	530	0	0	530	1.63663
1.2589	0	535	0	525	0	525	0	535	0	530	0	525	0	535	0	530	0	0	530	1.63663
1.2699	0	535	0	525	0	525	0	535	0	530	0	525	0	535	0	530	0	0	530	1.63663
1.281	0	535	0	525	0	525	0	535	0	530	0	525	0	535	0	530	0	0	530	1.63663
1.292	0	535	0	525	0	525	0	535	0	530	0	525	0	535	0	530	0	0	530	1.63663
1.3031	0	535	0	525	0	525	0	535	0	530	0	525	0	535	0	530	0	0	530	1.63663
1.3141	0	535	0	525	0	525	0	535	0	530	0	525	0	535	0	530	0	0	530	1.63663
1.3251	0	535	0	525	0	525	0	535	0	530	0	525	0	535	0	530	0	0	530	1.63663
1.3362	0	535	0	525	0	525	0	535	0	530	0	525	0	535	0	530	0	0	530	1.63663
1.3472	0	535	0	525	0	525	0	535	0	530	0	525	0	535	0	530	0	0	530	1.63663
1.3583	0	535	0	525	0	525	0	535	0	530	0	525	0	535	0	530	0	0	530	1.63663
1.3693	0	535	0	525	0	525	0	535	0	530	0	525	0	535	0	530	0	0	530	1.63663
1.3804	0	535	0	525	0	525	0	535	0	530	0	525	0	535	0	530	0	0	530	1.63663
1.3914	0	535	0	525	0	525	0	535	0	530	0	525	0	535	0	530	0	0	530	1.63663
1.4024	0	535	0	525	0	525	0	535	0	530	0	525	0	535	0	530	0	0	530	1.63663
1.4135	0	535	0	525	0	525	0	535	0	530	0	525	0	535	0	530	0	0	530	1.63663
1.4245	0	535	0	525	0	525	0	535	0	530	0	525	0	535	0	530	0	0	530	1.63663
1.4356	0	535	0	525	0	525	0	535	0	530	0	525	0	535	0	530	0	0	530	1.63663
1.4466	0	535	0	525	0	525	0	535	0	530	0	525	0	535	0	530	0	0	530	1.63663
1.4577	0	535	0	525	0	525	0	535	0	530	0	525	0	535	0	530	0	0	530	1.63663
1.4687	0	535	0	525	0	525	0	535	0	530	0	525	0	535	0	530	0	0	530	1.63663
1.4797	0	535	0	525	0	525	0	535	0	530	0	525	0	535	0	530	0	0	530	1.63663
1.4908	0	535	0	525	0	525	0	535	0	530	0	525	0	535	0	530	0	0	530	1.63663
1.5018	0	535	0	525	0	525	0	535	0	530	0	525	0	535	0	530	0	0	530	1.63663
1.5129	0	535	0	525	0	525	0	535	0	530	0	525	0	535	0	530	0	0	530	1.63663
1.5239	0	535	0	525	0	525	0	535	0	530	0	525	0	535	0	530	0	0	530	1.63663
1.535	0	535	0	525	0	525	0	535	0	530	0	525	0	535	0	530	0	0	530	1.63663
1.546	0	535	0	525	0	525	0	535	0	530	0	525	0	535	0	530	0	0	530	1.63663
1.557	0	535	0	525	0	525	0	535	0	530	0	525	0	535	0	530	0	0	530	1.63663
1.5681	0	535	0	525	0	525	0	535	0	530	0	525	0	535	0	530	0	0	530	1.63663
1.5791	0	535	0	525	0	525	0	535	0	530	0	525	0	535	0	530	0	0	530	1.63663
1.5902	0	535	0	525	0	525	0	535	0	530	0	525	0	535	0	530	0	0	530	1.63663
1.6012	0	535	0	525	0	525	0	535	0	530	0	525	0	535	0	530	0	0	530	1.63663
1.6123	0	535	0	525	0	525	0	535	0	530	0	525	0	535	0	530	0	0	530	1.63663
1.6233	0	535	0	525	0	525	0	535	0	530	0	525	0	535	0	530	0	0	530	1.63663
1.6343	0	535	0	525	0	525	0	535	0	530	0	525	0	535	0	530	0	0	530	1.63663
1.6454	0	535	0	525	0	525	0	535	0	530	0	525	0	535	0	530	0	0	530	1.63663
1.6564	0	535	0	525	0	525	0	535	0	530	0	525	0	535	0	530	0	0	530	1.63663
1.6675	0	535	0	525	0	525	0	535	0	530	0	525	0	535	0	530	0	0	530	1.63663
1.6785	0	535	0	525	0	525	0	535	0	530	0	525	0	535	0	530	0	0	530	1.63663
1.6896	0	535	0	525	0	525	0	535	0	530	0	525	0	535	0	530	0	0	530	1.63663
1.7006	0	535	0	525	0	525	0	535	0	530	0	525	0	535	0	530	0	0	530	1.63663
1.7116	0	535	0	525	0	525	0	535	0	530	0	525	0	535	0	530	0	0	530	1.63663
1.7227	0	535	0	525	0	525	0	535	0	530	0	525	0	535	0	530	0	0	530	1.63663
1.7337	0	535	0	525	0	525	0	535	0	530	0	525	0	535	0	530	0	0	530	1.63663
1.7448	0	535	0	525	0	525	0	535	0	530	0	525	0	535	0	530	0	0	530	1.63663
1.7558	0	535	0	525	0	525	0	535	0	530	0	525	0	535	0	530	0	0	530	1.63663
1.7669	0	535	0	525	0	525	0	535	0	530	0	525	0	535	0	530	0	0	530	1.63663
1.7779	0	535	0	525	0	525	0	535	0	530	0	525	0	535	0	530	0	0	530	1.63663
1.7889	0	535	0	525	0	525	0	535	0	530	0	525	0	535	0	530	0	0	530	1.63663
1.8	0	535	0	525	0	525	0	535	0	530	0	525	0	535	0	530	0	0	530	1.63663
1.811	0	535	0	525	0	525	0	535	0	530	0	525	0	535	0	530	0	0	530	1.63663
1.8221	0	535	0	525	0	525	0	535	0	530	0	525	0	535	0	530	0	0	530	1.63663
1.8331	0	535	0	525	0	525	0	535	0	530	0	525	0	535	0	530	0	0	530	1.63663
1.8442	0	535	0	525	0	525	0	535	0	530	0	525	0	535	0	530	0	0	530	1.63663
1.8552	0	535	0	525	0	525	0	535	0	530	0	525	0	535	0	530	0	0	530	1.63663
1.8662	0	535	0	525	0	525	0	535	0	530	0	525	0	535	0	530	0	0	530	1.63663
1.8773	0	535	0	525	0	525	0	535	0	530	0	525	0	535	0	530	0	0	530	1.63663
1.8883	0	535	0	525	0	525	0	535	0	530	0	525	0	535	0	530	0	0	530	1.63663
1.8994	0	535	0	525	0	525	0	535	0	530	0	525	0	535	0	530	0	0	530	1.63663
1.9104	0	535	0	525	0	525	0	535	0	530	0	525	0	535	0	530	0	0	530	1.63663
1.9215	0	535	0	525	0	525	0	535	0	530	0	525	0	535	0	530	0	0	530	1.63663
1.9325	0	535	0	525	0	525	0	535	0	530	0	525	0	535	0	530	0	0	530	1.63663
1.9435	0	535	0	525	0	525	0	535	0	530	0	525	0	535	0	530	0	0	530	1.63663
1.9546	0	535	0	525	0	525	0	535	0	530	0	525	0	535	0	530	0	0	530	1.63663
1.9656	0	535	0	525	0	525	0	535	0	530	0	525	0	535	0	530	0	0	530	1.63663
1.9767	0	535	0	525	0	525	0	535	0	530	0	525	0	535	0	530	0	0	530	1.63663
1.9877	0	535	0	525	0	525	0	535	0	530	0	525	0	535	0	530	0	0	530	1.63663
1.9988	0	535	0	525	0	525	0	535	0	530	0	525	0	535	0	530	0	0	530	1.63663
2.0098	0	535	0	525	0	525	0	535	0	530	0	525	0	535	0	530	0	0	530	1.63663
2.0208	0	535	0	525	0	525	0	535	0	530	0	525	0	535	0	530	0	0	530	1.63663
2.0319	0	535	0	525	0	525	0	535	0	530	0	525	0	535	0	530	0	0	530	1.63663
2.0429	0	535	0	525	0	525	0	535	0	530	0	525	0	535	0	530	0	0	530	1.63663
2.054	0	535	0	525	0	525	0	535	0	530	0	525	0	535	0	530	0	0	530	1.63663
2.065	0	535	0	525	0	525	0	535	0	530	0	525	0	535	0	530	0	0	530	1.63663
2.0761	0	535	0	525	0	525	0	535	0	530	0	525	0	535	0	530	0	0	530	1.63663
2.0871	0	535	0	525	0	525	0	535	0	530	0	525	0	535	0	530	0	0	530	1.63663
2.0981	0	535	0	525	0	525	0	535	0	530	0	525	0	535	0	530	0	0	530	1.63663
2.1092	0	535	0	525	0	525	0	535	0	530	0	525	0	535	0	530	0	0	530	1.63663
2.1202	0	535	0	525	0	525	0	535	0	530	0	525	0	535	0	530	0	0	530	1.63663
2.1313	0	535	0	525	0	525	0	535	0	530	0	525	0	535	0	530	0	0	530	1.63663
2.1423	0	535	0	525	0	525	0	535	0	530	0	525	0	535	0	530	0	0	530	1.63663
2.1534	0	535	0	525	0	525	0	535	0	530	0	525	0	535	0	530	0	0	530	1.63663
2.1644	0	535	0	525	0	525	0	535	0	530	0	525	0	535	0	530	0	0	530	1.63663
2.1754	0	535	0	525	0	525	0	535	0	530	0	525	0	535	0	530	0	0	530	1.63663
2.1865	0	535	0	525	0	525	0	535	0	530	0	525	0	535	0	530	0	0	530	1.63663
2.1975	0	535	0	525	0	525	0	535	0	530	0	525	0	535	0	530	0	0	530	1.63663
2.2086	0	535	0	525	0	525	0	535	0	530	0	525	0	535	0	530	0	0	530	1.63663
2.2196	0	535	0	525	0	525	0	535	0	530	0	525	0	535	0	530	0	0	530	1.63663
2.2307	0	535	0	525	0	525	0	535	0	530	0	525	0	535	0	530	0	0	530	1.63663
2.2417	0	535	0	525	0	525	0	535	0	530	0	525	0	535	0	530	0	0	530	1.63663
2.2527	0	535	0	525	0	525	0	535	0	530	0	525	0	535	0	530	0	0	530	1.63663
2.2638	0	535	0	525	0	525	0	535	0	530	0	525	0	535	0	530	0	0	530	1.63663
2.2748	0	535	0	525	0	525	0	535	0	530	0	525	0	535	0	530	0	0	530	1.63663
2.2859	0	535	0	525	0	525	0	535	0	530	0	525	0	535	0	530	0	0	530	1.63663
2.2969	0	535	0	525	0	525	0	535	0	530	0	525	0	535	0	530	0	0	530	1.63663
2.308	0	535	0	525	0	525	0	535	0	530	0	525	0	535	0	530	0	0	530	1.63663
2.319	0	535	0	525	0	525	0	535	0	530	0	525	0	535	0	530	0	0	530	1.63663
2.33	0	535	0	525	0	525	0	535	0	530	0	525	0	535	0	530	0	0	530	1.63663
2.3411	0	535	0	525	0	525	0	535	0	530	0	525	0	535	0	530	0	0	530	1.63663
2.3521	0	535	0	525	0	525	0	535	0	530	0	525	0	535	0	530	0	0	530	1.63663
2.3632	0	535	0	525	0	525	0	535	0	530	0	525	0	535	0	530	0	0	530	1.63663
2.3742	0	535	0	525	0	525	0	535	0	530	0	525	0	535	0	530	0	0	530	1.63663
2.3853	0	535	0	525	0	525	0	535	0	530	0	525	0	535	0	530	0	0	530	1.63663
2.3963	0	535	0	525	0	525	0	535	0	530	0	525	0	535	0	530	0	0	530	1.63663
2.4073	0	535	0	525	0	525	0	535	0	530	0	525	0	535	0	530	0	0	530	1.63663
2.4184	0	535	0	525	0	525	0	535	0	530	0	525	0	535	0	530	0	0	530	1.63663
2.4294	0	535	0	525	0	525	0	535	0	530	0	525	0	535	0	530	0	0	530	1.63663
2.4405	0	535	0	525	0	525	0	535	0	530	0	525	0	535	0	530	0	0	530	1.63663
2.4515	0	535	0	525	0	525	0	535	0	530	0	525	0	535	0	530	0	0	530	1.63663
2.4626	0	535	0	525	0	525	0	535	0	530	0	525	0	535	0	530	0	0	530	1.63663
2.4736	0	535	0	525	0	525	0	535	0	530	0	525	0	535	0	530	0	0	530	1.63663
2.4846	0	535	0	525	0	525	0	535	0	530	0	525	0	535	0	530	0	0	530	1.63663
2.4957	0	535	0	525	0	525	0	535	0	530	0	525	0	535	0	530	0	0	530	1.63663
2.5067	0	535	0	525	0	525	0	535	0	530	0	525	0	535	0	530	0	0	530	1.63663
2.5178	0	535	0	525	0	525	0	535	0	530	0	525	0	535	0	530	0	0	530	1.63663
2.5288	0	535	0	525	0	525	0	535	0	530	0	525	0	535	0	530	0	0	530	1.63663
2.5399	0	535	0	525	0	525	0	535	0	530	0	525	0	535	0	530	0	0	530	1.63663
2.5509	0	535	0	525	0	525	0	535	0	530	0	525	0	535	0	530	0	0	530	1.63663
2.5619	0	535	0	525	0	525	0	535	0	530	0	525	0	535	0	530	0	0	530	1.63663
2.573	0	535	0	525	0	525	0	535	0	530	0	525	0	535	0	530	0	0	530	1.63663
2.584	0	535	0	525	0	525	0	535	0	530	0	525	0	535	0	530	0	0	530	1.63663
2.5951	0	535	0	525	0	525	0	535	0	530	0	525	0	535	0	530	0	0	530	1.63663
2.6061	0	535	0	525	0	525	0	535	0	530	0	525	0	535	0	530	0	0	530	1.63663
2.6172	0	535	0	525	0	525	0	535	0	530	0	525	0	535	0	530	0	0	530	1.63663
2.6282	0	535	0	525	0	525	0	535	0	530	0	525	0	535	0	530	0	0	530	1.63663
2.6392	0	535	0	525	0	525	0	535	0	530	0	525	0	535	0	530	0	0	530	1.63663
2.6503	0	535	0	525	0	525	0	535	0	530	0	525	0	535	0	530	0	0	530	1.63663
2.6613	0	535	0	525	0	525	0	535	0	530	0	525	0	535	0	530	0	0	530	1.63663
2.6724	0	535	0	525	0	525	0	535	0	530	0	525	0	535	0	530	0	0	530	1.63663
2.6834	0	535	0	525	0	525	0	535	0	530	0	525	0	535	0	530	0	0	530	1.63663
2.6945	0	535	0	525	0	525	0	535	0	530	0	525	0	535	0	530	0	0	530	1.63663
2.7055	0	535	0	525	0	525	0	535	0	530	0	525	0	535	0	530	0	0	530	1.63663
2.7165	0	535	0	525	0	525	0	535	0	530	0	525	0	535	0	530	0	0	530	1.63663
2.7276	0	535	0	525	0	525	0	535	0	530	0	525	0	535	0	530	0	0	530	1.63663
2.7386	0	535	0	525	0	525	0	535	0	530	0	525	0	535	0	530	0	0	530	1.63663
2.7497	0	535	0	525	0	525	0	535	0	530	0	525	0	535	0	530	0	0	530	1.63663
2.7607	0	535	0	525	0	525	0	535	0	530	0	525	0	535	0	530	0	0	530	1.63663
2.7718	0	535	0	525	0	525	0	535	0	530	0	525	0	535	0	530	0	0	530	1.63663
2.7828	0	535	0	525	0	525	0	535	0	530	0	525	0	535	0	530	0	0	530	1.63663
2.7938	0	535	0	525	0	525	0	535	0	530	0	525	0	535	0	530	0	0	530	1.63663
2.8049	0	535	0	525	0	525	0	535	0	530	0	525	0	535	0	530	0	0	530	1.63663
2.8159	0	535	0	525	0	525	0	535	0	530	0	525	0	535	0	530	0	0	530	1.63663
2.827	0	535	0	525	0	525	0	535	0	530	0	525	0	535	0	530	0	0	530	1.63663
2.838	0	535	0	525	0	525	0	535	0	530	0	525	0	535	0	530	0	0	530	1.63663
2.8491	0	535	0	525	0	525	0	535	0	530	0	525	0	535	0	530	0	0	530	1.63663
2.8601	0	535	0	525	0	525	0	535	0	530	0	525	0	535	0	530	0	0	530	1.63663
2.8711	0	535	0	525	0	525	0	535	0	530	0	525	0	535	0	530	0	0	530	1.63663
2.8822	0	535	0	525	0	525	0	535	0	530	0	525	0	535	0	530	0	0	530	1.63663
2.8932	0	535	0	525	0	525	0	535	0	530	0	525	0	535	0	530	0	0	530	1.63663
2.9043	0	535	0	525	0	525	0	535	0	530	0	525	0	535	0	530	0	0	530	1.63663
2.9153	0	535	0	525	0	525	0	535	0	530	0	525	0	535	0	530	0	0	530	1.63663
2.9264	0	535	0	525	0	525	0	535	0	530	0	525	0	535	0	530	0	0	530	1.63663
2.9374	0	535	0	525	0	525	0	535	0	530	0	525	0	535	0	530	0	0	530	1.63663
2.9484	0	535	0	525	0	525	0	535	0	530	0	525	0	535	0	530	0	0	530	1.63663
2.9595	0	535	0	525	0	525	0	535	0	530	0	525	0	535	0	530	0	0	530	1.63663
2.9705	0	535	0	525	0	525	0	535	0	530	0	525	0	535	0	530	0	0	530	1.63663
2.9816	0	535	0	525	0	525	0	535	0	530	0	525	0	535	0	530	0	0	530	1.63663
2.9926	0	535	0	525	0	525	0	535	0	530	0	525	0	535	0	530	0	0	530	1.63663
3.0037	0	535	0	525	0	525	0	535	0	530	0	525	0	535	0	530	0	0	530	1.63663
3.0147	0	535	0	525	0	525	0	535	0	530	0	525	0	535	0	530	0	0	530	1.63663
3.0257	0	535	0	525	0	525	0	535	0	530	0	525	0	535	0	530	0	0	530	1.63663
3.0368	0	535	0	525	0	525	0	535	0	530	0	525	0	535	0	530	0	0	530	1.63663
3.0478	0	535	0	525	0	525	0	535	0	530	0	525	0	535	0	530	0	0	530	1.63663
3.0589	0	535	0	525	0	525	0	535	0	530	0	525	0	535	0	530	0	0	530	1.63663
3.0699	0	535	0	525	0	525	0	535	0	530	0	525	0	535	0	530	0	0	530	1.63663
3.081	0	535	0	525	0	525	0	535	0	530	0	525	0	535	0	530	0	0	530	1.63663
3.092	0	535	0	525	0	525	0	535	0	530	0	525	0	535	0	530	0	0	530	1.63663
3.103	0	535	0	525	0	525	0	535	0	530	0	525	0	535	0	530	0	0	530	1.63663
3.1141	0	535	0	525	0	525	0	535	0	530	0	525	0	535	0	530	0	0	530	1.63663
3.1251	0	535	0	525	0	525	0	535	0	530	0	525	0	535	0	530	0	0	530	1.63663
3.1362	0	535	0	525	0	525	0	535	0	530	0	525	0	535	0	530	0	0	530	1.63663
3.1472	0	535	0	525	0	525	0	535	0	530	0	525	0	535	0	530	0	0	530	1.63663
3.1583	0	535	0	525	0	525	0	535	0	530	0	525	0	535	0	530	0	0	530	1.63663
3.1693	0	535	0	525	0	525	0	535	0	530	0	525	0	535	0	530	0	0	530	1.63663
3.1803	0	535	0	525	0	525	0	535	0	530	0	525	0	535	0	530	0	0	530	1.63663
3.1914	0	535	0	525	0	525	0	535	0	530	0	525	0	535	0	530	0	0	530	1.63663
3.2024	0	535	0	525	0	525	0	535	0	530	0	525	0	535	0	530	0	0	530	1.63663
3.2135	0	535	0	525	0	525	0	535	0	530	0	525	0	535	0	530	0	0	530	1.63663
3.2245	0	535	0	525	0	525	0	535	0	530	0	525	0	535	0	530	0	0	530	1.63663
3.2356	0	535	0	525	0	525	0	535	0	530	0	525	0	535	0	530	0	0	530	1.63663
3.2466	0	535	0	525	0	525	0	535	0	530	0	525	0	535	0	530	0	0	530	1.63663
3.2576	0	535	0	525	0	525	0	535	0	530	0	525	0	535	0	530	0	0	530	1.63663
3.2687	0	535	0	525	0	525	0	535	0	530	0	525	0	535	0	530	0	0	530	1.63663
3.2797	0	535	0	525	0	525	0	535	0	530	0	525	0	535	0	530	0	0	530	1.63663
3.2908	0	535	0	525	0	525	0	535	0	530	0	525	0	535	0	530	0	0	530	1.63663
3.3018	0	535	0	525	0	525	0	535	0	530	0	525	0	535	0	530	0	0	530	1.63663
3.3129	0	535	0	525	0	525	0	535	0	530	0	525	0	535	0	530	0	0	530	1.63663
3.3239	0	535	0	525	0	525	0	535	0	530	0	525	0	535	0	530	0	0	530	1.63663
3.3349	0	535	0	525	0	525	0	535	0	530	0	525	0	535	0	530	0	0	530	1.63663
3.346	0	535	0	525	0	525	0	535	0	530	0	525	0	535	0	530	0	0	530	1.63663
3.357	0	535	0	525	0	525	0	535	0	530	0	525	0	535	0	530	0	0	530	1.63663
3.3681	0	535	0	525	0	525	0	535	0	530	0	525	0	535	0	530	0	0	530	1.63663
3.3791	0	535	0	525	0	525	0	535	0	530	0	525	0	535	0	530	0	0	530	1.63663
3.3902	0	535	0	525	0	525	0	535	0	530	0	525	0	535	0	530	0	0	530	1.63663
3.4012	0	535	0	525	0	525	0	535	0	530	0	525	0	535	0	530	0	0	530	1.63663
3.4122	0	535	0	525	0	525	0	535	0	530	0	525	0	535	0	530	0	0	530	1.63663
3.4233	0	535	0	525	0	525	0	535	0	530	0	525	0	535	0	530	0	0	530	1.63663
3.4343	0	535	0	525	0	525	0	535	0	530	0	525	0	535	0	530	0	0	530	1.63663
3.4454	0	535	0	525	0	525	0	535	0	530	0	525	0	535	0	530	0	0	530	1.63663
3.4564	0	535	0	525	0	525	0	535	0	530	0	525	0	535	0	530	0	0	530	1.63663
3.4675	0	535	0	525	0	525	0	535	0	530	0	525	0	535	0	530	0	0	530	1.63663
3.4785	0	535	0	525	0	525	0	535	0	530	0	525	0	535	0	530	0	0	530	1.63663
3.4895	0	535	0	525	0	525	0	535	0	530	0	525	0	535	0	530	0	0	530	1.63663
3.5006	0	535	0	525	0	525	0	535	0	530	0	525	0	535	0	530	0	0	530	1.63663
3.5116	0	535	0	525	0	525	0	535	0	530	0	525	0	535	0	530	0	0	530	1.63663
3.5227	0	535	0	525	0	525	0	535	0	530	0	525	0	535	0	530	0	0	530	1.63663
3.5337	0	535	0	525	0	525	0	535	0	530	0	525	0	535	0	530	0	0	530	1.63663
3.5448	0	535	0	525	0	525	0	535	0	530	0	525	0	535	0	530	0	0	530	1.63663
3.5558	0	535	0	525	0	525	0	535	0	530	0	525	0	535	0	530	0	0	530	1.63663
3.5668	0	535	0	525	0	525	0	535	0	530	0	525	0	535	0	530	0	0	530	1.63663
3.5779	0	535	0	525	0	525	0	535	0	530	0	525	0	535	0	530	0	0	530	1.63663
3.5889	0	535	0	525	0	525	0	535	0	530	0	525	0	535	0	530	0	0	530	1.63663
3.6	0	535	0	525	0	525	0	535	0	530	0	525	0	535	0	530	0	0	530	1.63663
3.611	0	535	0	525	0	525	0	535	0	530	0	525	0	535	0	530	0	0	530	1.63663
3.6221	0	535	0	525	0	525	0	535	0	530	0	525	0	535	0	530	0	0	530	1.63663
3.6331	0	535	0	525	0	525	0	535	0	530	0	525	0	535	0	530	0	0	530	1.63663
3.6441	0	535	0	525	0	525	0	535	0	530	0	525	0	535	0	530	0	0	530	1.63663
3.6552	0	535	0	525	0	525	0	535	0	530	0	525	0	535	0	530	0	0	530	1.63663
3.6662	0	535	0	525	0	525	0	535	0	530	0	525	0	535	0	530	0	0	530	1.63663
3.6773	0	535	0	525	0	525	0	535	0	530	0	525	0	535	0	530	0	0	530	1.63663
3.6883	0	535	0	525	0	525	0	535	0	530	0	525	0	535	0	530	0	0	530	1.63663
3.6994	0	535	0	525	0	525	0	535	0	530	0	525	0	535	0	530	0	0	530	1.63663
3.7104	0	535	0	525	0	525	0	535	0	530	0	525	0	535	0	530	0	0	530	1.63663
3.7214	0	535	0	525	0	525	0	535	0	530	0	525	0	535	0	530	0	0	530	1.63663
3.7325	0	535	0	525	0	525	0	535	0	530	0	525	0	535	0	530	0	0	530	1.63663
3.7435	0	535	0	525	0	525	0	535	0	530	0	525	0	535	0	530	0	0	530	1.63663
3.7546	0	535	0	525	0	525	0	535	0	530	0	525	0	535	0	530	0	0	530	1.63663
3.7656	0	535	0	525	0	525	0	535	0	530	0	525	0	535	0	530	0	0	530	1.63663
3.7767	0	535	0	525	0	525	0	535	0	530	0	525	0	535	0	530	0	0	530	1.63663
3.7877	0	535	0	525	0	525	0	535	0	530	0	525	0	535	0	530	0	0	530	1.63663
3.7987	0	535	0	525	0	525	0	535	0	530	0	525	0	535	0	530	0	0	530	1.63663
3.8098	0	535	0	525	0	525	0	535	0	530	0	525	0	535	0	530	0	0	530	1.63663
3.8208	0	535	0	525	0	525	0	535	0	530	0	525	0	535	0	530	0	0	530	1.63663
3.8319	0	535	0	525	0	525	0	535	0	530	0	525	0	535	0	530	0	0	530	1.63663
3.8429	0	535	0	525	0	525	0	535	0	530	0	525	0	535	0	530	0	0	530	1.63663
3.854	0	535	0	525	0	525	0	535	0	530	0	525	0	535	0	530	0	0	530	1.63663
3.865	0	535	0	525	0	525	0	535	0	530	0	525	0	535	0	530	0	0	530	1.63663
3.876	0	535	0	525	0	525	0	535	0	530	0	525	0	535	0	530	0	0	530	1.63663
3.8871	0	535	0	525	0	525	0	535	0	530	0	525	0	535	0	530	0	0	530	1.63663
3.8981	0	535	0	525	0	525	0	535	0	530	0	525	0	535	0	530	0	0	530	1.63663
3.9092	0	535	0	525	0	525	0	535	0	530	0	525	0	535	0	530	0	0	530	1.63663
3.9202	0	535	0	525	0	525	0	535	0	530	0	525	0	535	0	530	0	0	530	1.63663
3.9313	0	535	0	525	0	525	0	535	0	530	0	525	0	535	0	530	0	0	530	1.63663
3.9423	0	535	0	525	0	525	0	535	0	530	0	525	0	535	0	530	0	0	530	1.63663
3.9533	0	535	0	525	0	525	0	535	0	530	0	525	0	535	0	530	0	0	530	1.63663
3.9644	0	535	0	525	0	525	0	535	0	530	0	525	0	535	0	530	0	0	530	1.63663
3.9754	0	535	0	525	0	525	0	535	0	530	0	525	0	535	0	530	0	0	530	1.63663
3.9865	0	535	0	525	0	525	0	535	0	530	0	525	0	535	0	530	0	0	530	1.63663
3.9975	0	535	0	525	0	525	0	535	0	530	0	525	0	535	0	530	0	0	530	1.63663
4.0086	0	535	0	525	0	525	0	535	0	530	0	525	0	535	0	530	0	0	530	1.63663
4.0196	0	535	0	525	0	525	0	535	0	530	0	525	0	535	0	530	0	0	530	1.63663
4.0306	0	535	0	525	0	525	0	535	0	530	0	525	0	535	0	530	0	0	530	1.63663
4.0417	0	535	0	525	0	525	0	535	0	530	0	525	0	535	0	530	0	0	530	1.63663
4.0527	0	535	0	525	0	525	0	535	0	530	0	525	0	535	0	530	0	0	530	1.63663
4.0638	0	535	0	525	0	525	0	535	0	530	0	525	0	535	0	530	0	0	530	1.63663
4.0748	0	535	0	525	0	525	0	535	0	530	0	525	0	535	0	530	0	0	530	1.63663
4.0859	0	535	0	525	0	525	0	535	0	530	0	525	0	535	0	530	0	0	530	1.63663
4.0969	0	535	0	525	0	525	0	535	0	530	0	525	0	535	0	530	0	0	530	1.63663
4.1079	0	535	0	525	0	525	0	535	0	530	0	525	0	535	0	530	0	0	530	1.63663
4.119	0	535	0	525	0	525	0	535	0	530	0	525	0	535	0	530	0	0	530	1.63663
4.13	0	535	0	525	0	525	0	535	0	530	0	525	0	535	0	530	0	0	530	1.63663
4.1411	0	535	0	525	0	525	0	535	0	530	0	525	0	535	0	530	0	0	530	1.63663
4.1521	0	535	0	525	0	525	0	535	0	530	0	525	0	535	0	530	0	0	530	1.63663
4.1632	0	535	0	525	0	525	0	535	0	530	0	525	0	535	0	530	0	0	530	1.63663
4.1742	0	535	0	525	0	525	0	535	0	530	0	525	0	535	0	530	0	0	530	1.63663
4.1852	0	535	0	525	0	525	0	535	0	530	0	525	0	535	0	530	0	0	530	1.63663
4.1963	0	535	0	525	0	525	0	535	0	530	0	525	0	535	0	530	0	0	530	1.63663
4.2073	0	535	0	525	0	525	0	535	0	530	0	525	0	535	0	530	0	0	530	1.63663
4.2184	0	535	0	525	0	525	0	535	0	530	0	525	0	535	0	530	0	0	530	1.63663
4.2294	0	535	0	525	0	525	0	535	0	530	0	525	0	535	0	530	0	0	530	1.63663
4.2405	0	535	0	525	0	525	0	535	0	530	0	525	0	535	0	530	0	0	530	1.63663
4.2515	0	535	0	525	0	525	0	535	0	530	0	525	0	535	0	530	0	0	530	1.63663
4.2625	0	535	0	525	0	525	0	535	0	530	0	525	0	535	0	530	0	0	530	1.63663
4.2736	0	535	0	525	0	525	0	535	0	530	0	525	0	535	0	530	0	0	530	1.63663
4.2846	0	535	0	525	0	525	0	535	0	530	0	525	0	535	0	530	0	0	530	1.63663
4.2957	0	535	0	525	0	525	0	535	0	530	0	525	0	535	0	530	0	0	530	1.63663
4.3067	0	535	0	525	0	525	0	535	0	530	0	525	0	535	0	530	0	0	530	1.63663
4.3178	0	535	0	525	0	525	0	535	0	530	0	525	0	535	0	530	0	0	530	1.63663
4.3288	0	535	0	525	0	525	0	535	0	530	0	525	0	535	0	530	0	0	530	1.63663
4.3398	0	535	0	525	0	525	0	535	0	530	0	525	0	535	0	530	0	0	530	1.63663
4.3509	0	535	0	525	0	525	0	535	0	530	0	525	0	535	0	530	0	0	530	1.63663
4.3619	0	535	0	525	0	525	0	535	0	530	0	525	0	535	0	530	0	0	530	1.63663
4.373	0	535	0	525	0	525	0	535	0	530	0	525	0	535	0	530	0	0	530	1.63663
4.384	0	535	0	525	0	525	0	535	0	530	0	525	0	535	0	530	0	0	530	1.63663
4.3951	0	535	0	525	0	525	0	535	0	530	0	525	0	535	0	530	0	0	530	1.63663
4.4061	0	535	0	525	0	525	0	535	0	530	0	525	0	535	0	530	0	0	530	1.63663
4.4171	0	535	0	525	0	525	0	535	0	530	0	525	0	535	0	530	0	0	530	1.63663
4.4282	0	535	0	525	0	525	0	535	0	530	0	525	0	535	0	530	0	0	530	1.63663
4.4392	0	535	0	525	0	525	0	535	0	530	0	525	0	535	0	530	0	0	530	1.63663
4.4503	0	535	0	525	0	525	0	535	0	530	0	525	0	535	0	530	0	0	530	1.63663
4.4613	0	535	0	525	0	525	0	535	0	530	0	525	0	535	0	530	0	0	530	1.63663
4.4724	0	535	0	525	0	525	0	535	0	530	0	525	0	535	0	530	0	0	530	1.63663
4.4834	0	535	0	525	0	525	0	535	0	530	0	525	0	535	0	530	0	0	530	1.63663
4.4944	0	535	0	525	0	525	0	535	0	530	0	525	0	535	0	530	0	0	530	1.63663
4.5055	0	535	0	525	0	525	0	535	0	530	0	525	0	535	0	530	0	0	530	1.63663
4.5165	0	535	0	525	0	525	0	535	0	530	0	525	0	535	0	530	0	0	530	1.63663
4.5276	0	535	0	525	0	525	0	535	0	530	0	525	0	535	0	530	0	0	530	1.63663
4.5386	0	535	0	525	0	525	0	535	0	530	0	525	0	535	0	530	0	0	530	1.63663
4.5497	0	535	0	525	0	525	0	535	0	530	0	525	0	535	0	530	0	0	530	1.63663
4.5607	0	535	0	525	0	525	0	535	0	530	0	525	0	535	0	530	0	0	530	1.63663
4.5717	0	535	0	525	0	525	0	535	0	530	0	525	0	535	0	530	0	0	530	1.63663
4.5828	0	535	0	525	0	525	0	535	0	530	0	525	0	535	0	530	0	0	530	1.63663
4.5938	0	535	0	525	0	525	0	535	0	530	0	525	0	535	0	530	0	0	530	1.63663
4.6049	0	535	0	525	0	525	0	535	0	530	0	525	0	535	0	530	0	0	530	1.63663
4.6159	0	535	0	525	0	525	0	535	0	530	0	525	0	535	0	530	0	0	530	1.63663
4.627	0	535	0	525	0	525	0	535	0	530	0	525	0	535	0	530	0	0	530	1.63663
4.638	0	535	0	525	0	525	0	535	0	530	0	525	0	535	0	530	0	0	530	1.63663
4.649	0	535	0	525	0	525	0	535	0	530	0	525	0	535	0	530	0	0	530	1.63663
4.6601	0	535	0	525	0	525	0	535	0	530	0	525	0	535	0	530	0	0	530	1.63663
4.6711	0	535	0	525	0	525	0	535	0	530	0	525	0	535	0	530	0	0	530	1.63663
4.6822	0	535	0	525	0	525	0	535	0	530	0	525	0	535	0	530	0	0	530	1.63663
4.6932	0	535	0	525	0	525	0	535	0	530	0	525	0	535	0	530	0	0	530	1.63663
4.7043	0	535	0	525	0	525	0	535	0	530	0	525	0	535	0	530	0	0	530	1.63663
4.7153	0	535	0	525	0	525	0	535	0	530	0	525	0	535	0	530	0	0	530	1.63663
4.7263	0	535	0	525	0	525	0	535	0	530	0	525	0	535	0	530	0	0	530	1.63663
4.7374	0	535	0	525	0	525	0	535	0	530	0	525	0	535	0	530	0	0	530	1.63663
4.7484	0	535	0	525	0	525	0	535	0	530	0	525	0	535	0	530	0	0	530	1.63663
4.7595	0	535	0	525	0	525	0	535	0	530	0	525	0	535	0	530	0	0	530	1.63663
4.7705	0	535	0	525	0	525	0	535	0	530	0	525	0	535	0	530	0	0	530	1.63663
4.7816	0	535	0	525	0	525	0	535	0	530	0	525	0	535	0	530	0	0	530	1.63663
4.7926	0	535	0	525	0	525	0	535	0	530	0	525	0	535	0	530	0	0	530	1.63663
4.8036	0	535	0	525	0	525	0	535	0	530	0	525	0	535	0	530	0	0	530	1.63663
4.8147	0	535	0	525	0	525	0	535	0	530	0	525	0	535	0	530	0	0	530	1.63663
4.8257	0	535	0	525	0	525	0	535	0	530	0	525	0	535	0	530	0	0	530	1.63663
4.8368	0	535	0	525	0	525	0	535	0	530	0	525	0	535	0	530	0	0	530	1.63663
4.8478	0	535	0	525	0	525	0	535	0	530	0	525	0	535	0	530	0	0	530	1.63663
4.8589	0	535	0	525	0	525	0	535	0	530	0	525	0	535	0	530	0	0	530	1.63663
4.8699	0	535	0	525	0	525	0	535	0	530	0	525	0	535	0	530	0	0	530	1.63663
4.8809	0	535	0	525	0	525	0	535	0	530	0	525	0	535	0	530	0	0	530	1.63663
4.892	0	535	0	525	0	525	0	535	0	530	0	525	0	535	0	530	0	0	530	1.63663
4.903	0	535	0	525	0	525	0	535	0	530	0	525	0	535	0	530	0	0	530	1.63663
4.9141	0	535	0	525	0	525	0	535	0	530	0	525	0	535	0	530	0	0	530	1.63663
4.9251	0	535	0	525	0	525	0	535	0	530	0	525	0	535	0	530	0	0	530	1.63663
4.9362	0	535	0	525	0	525	0	535	0	530	0	525	0	535	0	530	0	0	530	1.63663
4.9472	0	535	0	525	0	525	0	535	0	530	0	525	0	535	0	530	0	0	530	1.63663
4.9582	0	535	0	525	0	525	0	535	0	530	0	525	0	535	0	530	0	0	530	1.63663
4.9693	0	535	0	525	0	525	0	535	0	530	0	525	0	535	0	530	0	0	530	1.63663
4.9803	0	535	0	525	0	525	0	535	0	530	0	525	0	535	0	530	0	0	530	1.63663
4.9914	0	535	0	525	0	525	0	535	0	530	0	525	0	535	0	530	0	0	530	1.63663
5.0024	0	535	0	525	0	525	0	535	0	530	0	525	0	535	0	530	0	0	530	1.63663
5.0135	0	535	0	525	0	525	0	535	0	530	0	525	0	535	0	530	0	0	530	1.63663
5.0245	0	535	0	525	0	525	0	535	0	530	0	525	0	535	0	530	0	0	530	1.63663
5.0355	0	535	0	525	0	525	0	535	0	530	0	525	0	535	0	530	0	0	530	1.63663
5.0466	0	535	0	525	0	525	0	535	0	530	0	525	0	535	0	530	0	0	530	1.63663
5.0576	0	535	0	525	0	525	0	535	0	530	0	525	0	535	0	530	0	0	530	1.63663
5.0687	0	535	0	525	0	525	0	535	0	530	0	525	0	535	0	530	0	0	530	1.63663
5.0797	0	535	0	525	0	525	0	535	0	530	0	525	0	535	0	530	0	0	530	1.63663
5.0908	0	535	0	525	0	525	0	535	0	530	0	525	0	535	0	530	0	0	530	1.63663
5.1018	0	535	0	525	0	525	0	535	0	530	0	525	0	535	0	530	0	0	530	1.63663
5.1128	0	535	0	525	0	525	0	535	0	530	0	525	0	535	0	530	0	0	530	1.63663
5.1239	0	535	0	525	0	525	0	535	0	530	0	525	0	535	0	530	0	0	530	1.63663
5.1349	0	535	0	525	0	525	0	535	0	530	0	525	0	535	0	530	0	0	530	1.63663
5.146	0	535	0	525	0	525	0	535	0	530	0	525	0	535	0	530	0	0	530	1.63663
5.157	0	535	0	525	0	525	0	535	0	530	0	525	0	535	0	530	0	0	530	1.63663
5.1681	0	535	0	525	0	525	0	535	0	530	0	525	0	535	0	530	0	0	530	1.63663
5.1791	0	535	0	525	0	525	0	535	0	530	0	525	0	535	0	530	0	0	530	1.63663
5.1901	0	535	0	525	0	525	0	535	0	530	0	525	0	535	0	530	0	0	530	1.63663
5.2012	0	535	0	525	0	525	0	535	0	530	0	525	0	535	0	530	0	0	530	1.63663
5.2122	0	535	0	525	0	525	0	535	0	530	0	525	0	535	0	530	0	0	530	1.63663
5.2233	0	535	0	525	0	525	0	535	0	530	0	525	0	535	0	530	0	0	530	1.63663
5.2343	0	535	0	525	0	525	0	535	0	530	0	525	0	535	0	530	0	0	530	1.63663
5.2454	0	535	0	525	0	525	0	535	0	530	0	525	0	535	0	530	0	0	530	1.63663
5.2564	0	535	0	525	0	525	0	535	0	530	0	525	0	535	0	530	0	0	530	1.63663
5.2674	0	535	0	525	0	525	0	535	0	530	0	525	0	535	0	530	0	0	530	1.63663
5.2785	0	535	0	525	0	525	0	535	0	530	0	525	0	535	0	530	0	0	530	1.63663
5.2895	0	535	0	525	0	525	0	535	0	530	0	525	0	535	0	530	0	0	530	1.63663
5.3006	0	535	0	525	0	525	0	535	0	530	0	525	0	535	0	530	0	0	530	1.63663
5.3116	0	535	0	525	0	525	0	535	0	530	0	525	0	535	0	530	0	0	530	1.63663
5.3227	0	535	0	525	0	525	0	535	0	530	0	525	0	535	0	530	0	0	530	1.63663
5.3337	0	535	0	525	0	525	0	535	0	530	0	525	0	535	0	530	0	0	530	1.63663
5.3447	0	535	0	525	0	525	0	535	0	530	0	525	0	535	0	530	0	0	530	1.63663
5.3558	0	535	0	525	0	525	0	535	0	530	0	525	0	535	0	530	0	0	530	1.63663
5.3668	0	535	0	525	0	525	0	535	0	530	0	525	0	535	0	530	0	0	530	1.63663
5.3779	0	535	0	525	0	525	0	535	0	530	0	525	0	535	0	530	0	0	530	1.63663
5.3889	0	535	0	525	0	525	0	535	0	530	0	525	0	535	0	530	0	0	530	1.63663
5.4	0	535	0	525	0	525	0	535	0	530	0	525	0	535	0	530	0	0	530	1.63663
5.411	0	535	0	525	0	525	0	535	0	530	0	525	0	535	0	530	0	0	530	1.63663
5.422	0	535	0	525	0	525	0	535	0	530	0	525	0	535	0	530	0	0	530	1.63663
5.4331	0	535	0	525	0	525	0	535	0	530	0	525	0	535	0	530	0	0	530	1.63663
5.4441	0	535	0	525	0	525	0	535	0	530	0	525	0	535	0	530	0	0	530	1.63663
5.4552	0	535	0	525	0	525	0	535	0	530	0	525	0	535	0	530	0	0	530	1.63663
5.4662	0	535	0	525	0	525	0	535	0	530	0	525	0	535	0	530	0	0	530	1.63663
5.4773	0	535	0	525	0	525	0	535	0	530	0	525	0	535	0	530	0	0	530	1.63663
5.4883	0	535	0	525	0	525	0	535	0	530	0	525	0	535	0	530	0	0	530	1.63663
5.4993	0	535	0	525	0	525	0	535	0	530	0	525	0	535	0	530	0	0	530	1.63663
5.5104	0	535	0	525	0	525	0	535	0	530	0	525	0	535	0	530	0	0	530	1.63663
5.5214	0	535	0	525	0	525	0	535	0	530	0	525	0	535	0	530	0	0	530	1.63663
5.5325	0	535	0	525	0	525	0	535	0	530	0	525	0	535	0	530	0	0	530	1.63663
5.5435	0	535	0	525	0	525	0	535	0	530	0	525	0	535	0	530	0	0	530	1.63663
5.5546	0	535	0	525	0	525	0	535	0	530	0	525	0	535	0	530	0	0	530	1.63663
5.5656	0	535	0	525	0	525	0	535	0	530	0	525	0	535	0	530	0	0	530	1.63663
5.5766	0	535	0	525	0	525	0	535	0	530	0	525	0	535	0	530	0	0	530	1.63663
5.5877	0	535	0	525	0	525	0	535	0	530	0	525	0	535	0	530	0	0	530	1.63663
5.5987	0	535	0	525	0	525	0	535	0	530	0	525	0	535	0	530	0	0	530	1.63663
5.6098	0	535	0	525	0	525	0	535	0	530	0	525	0	535	0	530	0	0	530	1.63663
5.6208	0	535	0	525	0	525	0	535	0	530	0	525	0	535	0	530	0	0	530	1.63663
5.6319	0	535	0	525	0	525	0	535	0	530	0	525	0	535	0	530	0	0	530	1.63663
5.6429	0	535	0	525	0	525	0	535	0	530	0	525	0	535	0	530	0	0	530	1.63663
5.6539	0	535	0	525	0	525	0	535	0	530	0	525	0	535	0	530	0	0	530	1.63663
5.665	0	535	0	525	0	525	0	535	0	530	0	525	0	535	0	530	0	0	530	1.63663
5.676	0	535	0	525	0	525	0	535	0	530	0	525	0	535	0	530	0	0	530	1.63663
5.6871	0	535	0	525	0	525	0	535	0	530	0	525	0	535	0	530	0	0	530	1.63663
5.6981	0	535	0	525	0	525	0	535	0	530	0	525	0	535	0	530	0	0	530	1.63663
5.7092	0	535	0	525	0	525	0	535	0	530	0	525	0	535	0	530	0	0	530	1.63663
5.7202	0	535	0	525	0	525	0	535	0	530	0	525	0	535	0	530	0	0	530	1.63663
5.7312	0	535	0	525	0	525	0	535	0	530	0	525	0	535	0	530	0	0	530	1.63663
5.7423	0	535	0	525	0	525	0	535	0	530	0	525	0	535	0	530	0	0	530	1.63663
5.7533	0	535	0	525	0	525	0	535	0	530	0	525	0	535	0	530	0	0	530	1.63663
5.7644	0	535	0	525	0	525	0	535	0	530	0	525	0	535	0	530	0	0	530	1.63663
5.7754	0	535	0	525	0	525	0	535	0	530	0	525	0	535	0	530	0	0	530	1.63663
5.7865	0	535	0	525	0	525	0	535	0	530	0	525	0	535	0	530	0	0	530	1.63663
5.7975	0	535	0	525	0	525	0	535	0	530	0	525	0	535	0	530	0	0	530	1.63663
5.8085	0	535	0	525	0	525	0	535	0	530	0	525	0	535	0	530	0	0	530	1.63663
5.8196	0	535	0	525	0	525	0	535	0	530	0	525	0	535	0	530	0	0	530	1.63663
5.8306	0	535	0	525	0	525	0	535	0	530	0	525	0	535	0	530	0	0	530	1.63663
5.8417	0	535	0	525	0	525	0	535	0	530	0	525	0	535	0	530	0	0	530	1.63663
5.8527	0	535	0	525	0	525	0	535	0	530	0	525	0	535	0	530	0	0	530	1.63663
5.8638	0	535	0	525	0	525	0	535	0	530	0	525	0	535	0	530	0	0	530	1.63663
5.8748	0	535	0	525	0	525	0	535	0	530	0	525	0	535	0	530	0	0	530	1.63663
5.8858	0	535	0	525	0	525	0	535	0	530	0	525	0	535	0	530	0	0	530	1.63663
5.8969	0	535	0	525	0	525	0	535	0	530	0	525	0	535	0	530	0	0	530	1.63663
5.9079	0	535	0	525	0	525	0	535	0	530	0	525	0	535	0	530	0	0	530	1.63663
5.919	0	535	0	525	0	525	0	535	0	530	0	525	0	535	0	530	0	0	530	1.63663
5.93	0	535	0	525	0	525	0	535	0	530	0	525	0	535	0	530	0	0	530	1.63663
5.9411	0	535	0	525	0	525	0	535	0	530	0	525	0	535	0	530	0	0	530	1.63663
5.9521	0	535	0	525	0	525	0	535	0	530	0	525	0	535	0	530	0	0	530	1.63663
5.9631	0	535	0	525	0	525	0	535	0	530	0	525	0	535	0	530	0	0	530	1.63663
5.9742	0	535	0	525	0	525	0	535	0	530	0	525	0	535	0	530	0	0	530	1.63663
5.9852	0	535	0	525	0	525	0	535	0	530	0	525	0	535	0	530	0	0	530	1.63663
5.9963	0	535	0	525	0	525	0	535	0	530	0	525	0	535	0	530	0	0	530	1.63663
6.0073	0	535	0	525	0	525	0	535	0	530	0	525	0	535	0	530	0	0	530	1.63663
6.0184	0	535	0	525	0	525	0	535	0	530	0	525	0	535	0	530	0	0	530	1.63663
6.0294	0	535	0	525	0	525	0	535	0	530	0	525	0	535	0	530	0	0	530	1.63663
6.0404	0	535	0	525	0	525	0	535	0	530	0	525	0	535	0	530	0	0	530	1.63663
6.0515	0	535	0	525	0	525	0	535	0	530	0	525	0	535	0	530	0	0	530	1.63663
6.0625	0	535	0	525	0	525	0	535	0	530	0	525	0	535	0	530	0	0	530	1.63663
6.0736	0	535	0	525	0	525	0	535	0	530	0	525	0	535	0	530	0	0	530	1.63663
6.0846	0	535	0	525	0	525	0	535	0	530	0	525	0	535	0	530	0	0	530	1.63663
6.0957	0	535	0	525	0	525	0	535	0	530	0	525	0	535	0	530	0	0	530	1.63663
6.1067	0	535	0	525	0	525	0	535	0	530	0	525	0	535	0	530	0	0	530	1.63663
6.1177	0	535	0	525	0	525	0	535	0	530	0	525	0	535	0	530	0	0	530	1.63663
6.1288	0	535	0	525	0	525	0	535	0	530	0	525	0	535	0	530	0	0	530	1.63663
6.1398	0	535	0	525	0	525	0	535	0	530	0	525	0	535	0	530	0	0	530	1.63663
6.1509	0	535	0	525	0	525	0	535	0	530	0	525	0	535	0	530	0	0	530	1.63663
6.1619	0	535	0	525	0	525	0	535	0	530	0	525	0	535	0	530	0	0	530	1.63663
6.173	0	535	0	525	0	525	0	535	0	530	0	525	0	535	0	530	0	0	530	1.63663
6.184	0	535	0	525	0	525	0	535	0	530	0	525	0	535	0	530	0	0	530	1.63663
6.195	0	535	0	525	0	525	0	535	0	530	0	525	0	535	0	530	0	0	530	1.63663
6.2061	0	535	0	525	0	525	0	535	0	530	0	525	0	535	0	530	0	0	530	1.63663
6.2171	0	535	0	525	0	525	0	535	0	530	0	525	0	535	0	530	0	0	530	1.63663
6.2282	0	535	0	525	0	525	0	535	0	530	0	525	0	535	0	530	0	0	530	1.63663
6.2392	0	535	0	525	0	525	0	535	0	530	0	525	0	535	0	530	0	0	530	1.63663
6.2503	0	535	0	525	0	525	0	535	0	530	0	525	0	535	0	530	0	0	530	1.63663
6.2613	0	535	0	525	0	525	0	535	0	530	0	525	0	535	0	530	0	0	530	1.63663
6.2723	0	535	0	525	0	525	0	535	0	530	0	525	0	535	0	530	0	0	530	1.63663
6.2834	0	535	0	525	0	525	0	535	0	530	0	525	0	535	0	530	0	0	530	1.63663
6.2944	0	535	0	525	0	525	0	535	0	530	0	525	0	535	0	530	0	0	530	1.63663
6.3055	0	535	0	525	0	525	0	535	0	530	0	525	0	535	0	530	0	0	530	1.63663
6.3165	0	535	0	525	0	525	0	535	0	530	0	525	0	535	0	530	0	0	530	1.63663
6.3276	0	535	0	525	0	525	0	535	0	530	0	525	0	535	0	530	0	0	530	1.63663
6.3386	0	535	0	525	0	525	0	535	0	530	0	525	0	535	0	530	0	0	530	1.63663
6.3496	0	535	0	525	0	525	0	535	0	530	0	525	0	535	0	530	0	0	530	1.63663
6.3607	0	535	0	525	0	525	0	535	0	530	0	525	0	535	0	530	0	0	530	1.63663
6.3717	0	535	0	525	0	525	0	535	0	530	0	525	0	535	0	530	0	0	530	1.63663
6.3828	0	535	0	525	0	525	0	535	0	530	0	525	0	535	0	530	0	0	530	1.63663
6.3938	0	535	0	525	0	525	0	535	0	530	0	525	0	535	0	530	0	0	530	1.63663
6.4049	0	535	0	525	0	525	0	535	0	530	0	525	0	535	0	530	0	0	530	1.63663
6.4159	0	535	0	525	0	525	0	535	0	530	0	525	0	535	0	530	0	0	530	1.63663
6.4269	0	535	0	525	0	525	0	535	0	530	0	525	0	535	0	530	0	0	530	1.63663
6.438	0	535	0	525	0	525	0	535	0	530	0	525	0	535	0	530	0	0	530	1.63663
6.449	0	535	0	525	0	525	0	535	0	530	0	525	0	535	0	530	0	0	530	1.63663
6.4601	0	535	0	525	0	525	0	535	0	530	0	525	0	535	0	530	0	0	530	1.63663
6.4711	0	535	0	525	0	525	0	535	0	530	0	525	0	535	0	530	0	0	530	1.63663
6.4822	0	535	0	525	0	525	0	535	0	530	0	525	0	535	0	530	0	0	530	1.63663
6.4932	0	535	0	525	0	525	0	535	0	530	0	525	0	535	0	530	0	0	530	1.63663
6.5042	0	535	0	525	0	525	0	535	0	530	0	525	0	535	0	530	0	0	530	1.63663
6.5153	0	535	0	525	0	525	0	535	0	530	0	525	0	535	0	530	0	0	530	1.63663
6.5263	0	535	0	525	0	525	0	535	0	530	0	525	0	535	0	530	0	0	530	1.63663
6.5374	0	535	0	525	0	525	0	535	0	530	0	525	0	535	0	530	0	0	530	1.63663
6.5484	0	535	0	525	0	525	0	535	0	530	0	525	0	535	0	530	0	0	530	1.63663
6.5595	0	535	0	525	0	525	0	535	0	530	0	525	0	535	0	530	0	0	530	1.63663
6.5705	0	535	0	525	0	525	0	535	0	530	0	525	0	535	0	530	0	0	530	1.63663
6.5815	0	535	0	525	0	525	0	535	0	530	0	525	0	535	0	530	0	0	530	1.63663
6.5926	0	535	0	525	0	525	0	535	0	530	0	525	0	535	0	530	0	0	530	1.63663
6.6036	0	535	0	525	0	525	0	535	0	530	0	525	0	535	0	530	0	0	530	1.63663
6.6147	0	535	0	525	0	525	0	535	0	530	0	525	0	535	0	530	0	0	530	1.63663
6.6257	0	535	0	525	0	525	0	535	0	530	0	525	0	535	0	530	0	0	530	1.63663
6.6368	0	535	0	525	0	525	0	535	0	530	0	525	0	535	0	530	0	0	530	1.63663
6.6478	0	535	0	525	0	525	0	535	0	530	0	525	0	535	0	530	0	0	530	1.63663
6.6588	0	535	0	525	0	525	0	535	0	530	0	525	0	535	0	530	0	0	530	1.63663
6.6699	0	535	0	525	0	525	0	535	0	530	0	525	0	535	0	530	0	0	530	1.63663
6.6809	0	535	0	525	0	525	0	535	0	530	0	525	0	535	0	530	0	0	530	1.63663
6.692	0	535	0	525	0	525	0	535	0	530	0	525	0	535	0	530	0	0	530	1.63663
6.703	0	535	0	525	0	525	0	535	0	530	0	525	0	535	0	530	0	0	530	1.63663
6.7141	0	535	0	525	0	525	0	535	0	530	0	525	0	535	0	530	0	0	530	1.63663
6.7251	0	535	0	525	0	525	0	535	0	530	0	525	0	535	0	530	0	0	530	1.63663
6.7361	0	535	0	525	0	525	0	535	0	530	0	525	0	535	0	530	0	0	530	1.63663
6.7472	0	535	0	525	0	525	0	535	0	530	0	525	0	535	0	530	0	0	530	1.63663
6.7582	0	535	0	525	0	525	0	535	0	530	0	525	0	535	0	530	0	0	530	1.63663
6.7693	0	535	0	525	0	525	0	535	0	530	0	525	0	535	0	530	0	0	530	1.63663
6.7803	0	535	0	525	0	525	0	535	0	530	0	525	0	535	0	530	0	0	530	1.63663
6.7914	0	535	0	525	0	525	0	535	0	530	0	525	0	535	0	530	0	0	530	1.63663
6.8024	0	535	0	525	0	525	0	535	0	530	0	525	0	535	0	530	0	0	530	1.63663
6.8134	0	535	0	525	0	525	0	535	0	530	0	525	0	535	0	530	0	0	530	1.63663
6.8245	0	535	0	525	0	525	0	535	0	530	0	525	0	535	0	530	0	0	530	1.63663
6.8355	0	535	0	525	0	525	0	535	0	530	0	525	0	535	0	530	0	0	530	1.63663
6.8466	0	535	0	525	0	525	0	535	0	530	0	525	0	535	0	530	0	0	530	1.63663
6.8576	0	535	0	525	0	525	0	535	0	530	0	525	0	535	0	530	0	0	530	1.63663
6.8687	0	535	0	525	0	525	0	535	0	530	0	525	0	535	0	530	0	0	530	1.63663
6.8797	0	535	0	525	0	525	0	535	0	530	0	525	0	535	0	530	0	0	530	1.63663
6.8907	0	535	0	525	0	525	0	535	0	530	0	525	0	535	0	530	0	0	530	1.63663
6.9018	0	535	0	525	0	525	0	535	0	530	0	525	0	535	0	530	0	0	530	1.63663
6.9128	0	535	0	525	0	525	0	535	0	530	0	525	0	535	0	530	0	0	530	1.63663
6.9239	0	535	0	525	0	525	0	535	0	530	0	525	0	535	0	530	0	0	530	1.63663
6.9349	0	535	0	525	0	525	0	535	0	530	0	525	0	535	0	530	0	0	530	1.63663
6.946	0	535	0	525	0	525	0	535	0	530	0	525	0	535	0	530	0	0	530	1.63663
6.957	0	535	0	525	0	525	0	535	0	530	0	525	0	535	0	530	0	0	530	1.63663
6.968	0	535	0	525	0	525	0	535	0	530	0	525	0	535	0	530	0	0	530	1.63663
6.9791	0	535	0	525	0	525	0	535	0	530	0	525	0	535	0	530	0	0	530	1.63663
6.9901	0	535	0	525	0	525	0	535	0	530	0	525	0	535	0	530	0	0	530	1.63663
7.0012	0	535	0	525	0	525	0	535	0	530	0	525	0	535	0	530	0	0	530	1.63663
7.0122	0	535	0	525	0	525	0	535	0	530	0	525	0	535	0	530	0	0	530	1.63663
7.0233	0	535	0	525	0	525	0	535	0	530	0	525	0	535	0	530	0	0	530	1.63663
7.0343	0	535	0	525	0	525	0	535	0	530	0	525	0	535	0	530	0	0	530	1.63663
7.0453	0	535	0	525	0	525	0	535	0	530	0	525	0	535	0	530	0	0	530	1.63663
7.0564	0	535	0	525	0	525	0	535	0	530	0	525	0	535	0	530	0	0	530	1.63663
7.0674	0	535	0	525	0	525	0	535	0	530	0	525	0	535	0	530	0	0	530	1.63663
7.0785	0	535	0	525	0	525	0	535	0	530	0	525	0	535	0	530	0	0	530	1.63663
7.0895	0	535	0	525	0	525	0	535	0	530	0	525	0	535	0	530	0	0	530	1.63663
7.1006	0	535	0	525	0	525	0	535	0	530	0	525	0	535	0	530	0	0	530	1.63663
7.1116	0	535	0	525	0	525	0	535	0	530	0	525	0	535	0	530	0	0	530	1.63663
7.1226	0	535	0	525	0	525	0	535	0	530	0	525	0	535	0	530	0	0	530	1.63663
7.1337	0	535	0	525	0	525	0	535	0	530	0	525	0	535	0	530	0	0	530	1.63663
7.1447	0	535	0	525	0	525	0	535	0	530	0	525	0	535	0	530	0	0	530	1.63663
7.1558	0	535	0	525	0	525	0	535	0	530	0	525	0	535	0	530	0	0	530	1.63663
7.1668	0	535	0	525	0	525	0	535	0	530	0	525	0	535	0	530	0	0	530	1.63663
7.1779	0	535	0	525	0	525	0	535	0	530	0	525	0	535	0	530	0	0	530	1.63663
7.1889	0	535	0	525	0	525	0	535	0	530	0	525	0	535	0	530	0	0	530	1.63663
7.1999	0	535	0	525	0	525	0	535	0	530	0	525	0	535	0	530	0	0	530	1.63663
7.211	0	535	0	525	0	525	0	535	0	530	0	525	0	535	0	530	0	0	530	1.63663
7.222	0	535	0	525	0	525	0	535	0	530	0	525	0	535	0	530	0	0	530	1.63663
7.2331	0	535	0	525	0	525	0	535	0	530	0	525	0	535	0	530	0	0	530	1.63663
7.2441	0	535	0	525	0	525	0	535	0	530	0	525	0	535	0	530	0	0	530	1.63663
7.2552	0	535	0	525	0	525	0	535	0	530	0	525	0	535	0	530	0	0	530	1.63663
7.2662	0	535	0	525	0	525	0	535	0	530	0	525	0	535	0	530	0	0	530	1.63663
7.2772	0	535	0	525	0	525	0	535	0	530	0	525	0	535	0	530	0	0	530	1.63663
7.2883	0	535	0	525	0	525	0	535	0	530	0	525	0	535	0	530	0	0	530	1.63663
7.2993	0	535	0	525	0	525	0	535	0	530	0	525	0	535	0	530	0	0	530	1.63663
7.3104	0	535	0	525	0	525	0	535	0	530	0	525	0	535	0	530	0	0	530	1.63663
7.3214	0	535	0	525	0	525	0	535	0	530	0	525	0	535	0	530	0	0	530	1.63663
7.3325	0	535	0	525	0	525	0	535	0	530	0	525	0	535	0	530	0	0	530	1.63663
7.3435	0	535	0	525	0	525	0	535	0	530	0	525	0	535	0	530	0	0	530	1.63663
7.3545	0	535	0	525	0	525	0	535	0	530	0	525	0	535	0	530	0	0	530	1.63663
7.3656	0	535	0	525	0	525	0	535	0	530	0	525	0	535	0	530	0	0	530	1.63663
7.3766	0	535	0	525	0	525	0	535	0	530	0	525	0	535	0	530	0	0	530	1.63663
7.3877	0	535	0	525	0	525	0	535	0	530	0	525	0	535	0	530	0	0	530	1.63663
7.3987	0	535	0	525	0	525	0	535	0	530	0	525	0	535	0	530	0	0	530	1.63663
7.4098	0	535	0	525	0	525	0	535	0	530	0	525	0	535	0	530	0	0	530	1.63663
7.4208	0	535	0	525	0	525	0	535	0	530	0	525	0	535	0	530	0	0	530	1.63663
7.4318	0	535	0	525	0	525	0	535	0	530	0	525	0	535	0	530	0	0	530	1.63663
7.4429	0	535	0	525	0	525	0	535	0	530	0	525	0	535	0	530	0	0	530	1.63663
7.4539	0	535	0	525	0	525	0	535	0	530	0	525	0	535	0	530	0	0	530	1.63663
7.465	0	535	0	525	0	525	0	535	0	530	0	525	0	535	0	530	0	0	530	1.63663
7.476	0	535	0	525	0	525	0	535	0	530	0	525	0	535	0	530	0	0	530	1.63663
7.4871	0	535	0	525	0	525	0	535	0	530	0	525	0	535	0	530	0	0	530	1.63663
7.4981	0	535	0	525	0	525	0	535	0	530	0	525	0	535	0	530	0	0	530	1.63663
7.5091	0	535	0	525	0	525	0	535	0	530	0	525	0	535	0	530	0	0	530	1.63663
7.5202	0	535	0	525	0	525	0	535	0	530	0	525	0	535	0	530	0	0	530	1.63663
7.5312	0	535	0	525	0	525	0	535	0	530	0	525	0	535	0	530	0	0	530	1.63663
7.5423	0	535	0	525	0	525	0	535	0	530	0	525	0	535	0	530	0	0	530	1.63663
7.5533	0	535	0	525	0	525	0	535	0	530	0	525	0	535	0	530	0	0	530	1.63663
7.5644	0	535	0	525	0	525	0	535	0	530	0	525	0	535	0	530	0	0	530	1.63663
7.5754	0	535	0	525	0	525	0	535	0	530	0	525	0	535	0	530	0	0	530	1.63663
7.5864	0	535	0	525	0	525	0	535	0	530	0	525	0	535	0	530	0	0	530	1.63663
7.5975	0	535	0	525	0	525	0	535	0	530	0	525	0	535	0	530	0	0	530	1.63663
7.6085	0	535	0	525	0	525	0	535	0	530	0	525	0	535	0	530	0	0	530	1.63663
7.6196	0	535	0	525	0	525	0	535	0	530	0	525	0	535	0	530	0	0	530	1.63663
7.6306	0	535	0	525	0	525	0	535	0	530	0	525	0	535	0	530	0	0	530	1.63663
7.6417	0	535	0	525	0	525	0	535	0	530	0	525	0	535	0	530	0	0	530	1.63663
7.6527	0	535	0	525	0	525	0	535	0	530	0	525	0	535	0	530	0	0	530	1.63663
7.6637	0	535	0	525	0	525	0	535	0	530	0	525	0	535	0	530	0	0	530	1.63663
7.6748	0	535	0	525	0	525	0	535	0	530	0	525	0	535	0	530	0	0	530	1.63663
7.6858	0	535	0	525	0	525	0	535	0	530	0	525	0	535	0	530	0	0	530	1.63663
7.6969	0	535	0	525	0	525	0	535	0	530	0	525	0	535	0	530	0	0	530	1.63663
7.7079	0	535	0	525	0	525	0	535	0	530	0	525	0	535	0	530	0	0	530	1.63663
7.719	0	535	0	525	0	525	0	535	0	530	0	525	0	535	0	530	0	0	530	1.63663
7.73	0	535	0	525	0	525	0	535	0	530	0	525	0	535	0	530	0	0	530	1.63663
7.741	0	535	0	525	0	525	0	535	0	530	0	525	0	535	0	530	0	0	530	1.63663
7.7521	0	535	0	525	0	525	0	535	0	530	0	525	0	535	0	530	0	0	530	1.63663
7.7631	0	535	0	525	0	525	0	535	0	530	0	525	0	535	0	530	0	0	530	1.63663
7.7742	0	535	0	525	0	525	0	535	0	530	0	525	0	535	0	530	0	0	530	1.63663
7.7852	0	535	0	525	0	525	0	535	0	530	0	525	0	535	0	530	0	0	530	1.63663
7.7963	0	535	0	525	0	525	0	535	0	530	0	525	0	535	0	530	0	0	530	1.63663
7.8073	0	535	0	525	0	525	0	535	0	530	0	525	0	535	0	530	0	0	530	1.63663
7.8183	0	535	0	525	0	525	0	535	0	530	0	525	0	535	0	530	0	0	530	1.63663
7.8294	0	535	0	525	0	525	0	535	0	530	0	525	0	535	0	530	0	0	530	1.63663
7.8404	0	535	0	525	0	525	0	535	0	530	0	525	0	535	0	530	0	0	530	1.63663
7.8515	0	535	0	525	0	525	0	535	0	530	0	525	0	535	0	530	0	0	530	1.63663
7.8625	0	535	0	525	0	525	0	535	0	530	0	525	0	535	0	530	0	0	530	1.63663
7.8736	0	535	0	525	0	525	0	535	0	530	0	525	0	535	0	530	0	0	530	1.63663
7.8846	0	535	0	525	0	525	0	535	0	530	0	525	0	535	0	530	0	0	530	1.63663
7.8956	0	535	0	525	0	525	0	535	0	530	0	525	0	535	0	530	0	0	530	1.63663
7.9067	0	535	0	525	0	525	0	535	0	530	0	525	0	535	0	530	0	0	530	1.63663
7.9177	0	535	0	525	0	525	0	535	0	530	0	525	0	535	0	530	0	0	530	1.63663
7.9288	0	535	0	525	0	525	0	535	0	530	0	525	0	535	0	530	0	0	530	1.63663
7.9398	0	535	0	525	0	525	0	535	0	530	0	525	0	535	0	530	0	0	530	1.63663
7.9509	0	535	0	525	0	525	0	535	0	530	0	525	0	535	0	530	0	0	530	1.63663
7.9619	0	535	0	525	0	525	0	535	0	530	0	525	0	535	0	530	0	0	530	1.63663
7.9729	0	535	0	525	0	525	0	535	0	530	0	525	0	535	0	530	0	0	530	1.63663
7.984	0	535	0	525	0	525	0	535	0	530	0	525	0	535	0	530	0	0	530	1.63663
7.995	0	535	0	525	0	525	0	535	0	530	0	525	0	535	0	530	0	0	530	1.63663
8.0061	0	535	0	525	0	525	0	535	0	530	0	525	0	535	0	530	0	0	530	1.63663
8.0171	0	535	0	525	0	525	0	535	0	530	0	525	0	535	0	530	0	0	530	1.63663
8.0282	0	535	0	525	0	525	0	535	0	530	0	525	0	535	0	530	0	0	530	1.63663
8.0392	0	535	0	525	0	525	0	535	0	530	0	525	0	535	0	530	0	0	530	1.63663
8.0502	0	535	0	525	0	525	0	535	0	530	0	525	0	535	0	530	0	0	530	1.63663
8.0613	0	535	0	525	0	525	0	535	0	530	0	525	0	535	0	530	0	0	530	1.63663
8.0723	0	535	0	525	0	525	0	535	0	530	0	525	0	535	0	530	0	0	530	1.63663
8.0834	0	535	0	525	0	525	0	535	0	530	0	525	0	535	0	530	0	0	530	1.63663
8.0944	0	535	0	525	0	525	0	535	0	530	0	525	0	535	0	530	0	0	530	1.63663
8.1055	0	535	0	525	0	525	0	535	0	530	0	525	0	535	0	530	0	0	530	1.63663
8.1165	0	535	0	525	0	525	0	535	0	530	0	525	0	535	0	530	0	0	530	1.63663
8.1275	0	535	0	525	0	525	0	535	0	530	0	525	0	535	0	530	0	0	530	1.63663
8.1386	0	535	0	525	0	525	0	535	0	530	0	525	0	535	0	530	0	0	530	1.63663
8.1496	0	535	0	525	0	525	0	535	0	530	0	525	0	535	0	530	0	0	530	1.63663
8.1607	0	535	0	525	0	525	0	535	0	530	0	525	0	535	0	530	0	0	530	1.63663
8.1717	0	535	0	525	0	525	0	535	0	530	0	525	0	535	0	530	0	0	530	1.63663
8.1828	0	535	0	525	0	525	0	535	0	530	0	525	0	535	0	530	0	0	530	1.63663
8.1938	0	535	0	525	0	525	0	535	0	530	0	525	0	535	0	530	0	0	530	1.63663
8.2048	0	535	0	525	0	525	0	535	0	530	0	525	0	535	0	530	0	0	530	1.63663
8.2159	0	535	0	525	0	525	0	535	0	530	0	525	0	535	0	530	0	0	530	1.63663
8.2269	0	535	0	525	0	525	0	535	0	530	0	525	0	535	0	530	0	0	530	1.63663
8.238	0	535	0	525	0	525	0	535	0	530	0	525	0	535	0	530	0	0	530	1.63663
8.249	0	535	0	525	0	525	0	535	0	530	0	525	0	535	0	530	0	0	530	1.63663
8.2601	0	535	0	525	0	525	0	535	0	530	0	525	0	535	0	530	0	0	530	1.63663
8.2711	0	535	0	525	0	525	0	535	0	530	0	525	0	535	0	530	0	0	530	1.63663
8.2821	0	535	0	525	0	525	0	535	0	530	0	525	0	535	0	530	0	0	530	1.63663
8.2932	0	535	0	525	0	525	0	535	0	530	0	525	0	535	0	530	0	0	530	1.63663
8.3042	0	535	0	525	0	525	0	535	0	530	0	525	0	535	0	530	0	0	530	1.63663
8.3153	0	535	0	525	0	525	0	535	0	530	0	525	0	535	0	530	0	0	530	1.63663
8.3263	0	535	0	525	0	525	0	535	0	530	0	525	0	535	0	530	0	0	530	1.63663
8.3374	0	535	0	525	0	525	0	535	0	530	0	525	0	535	0	530	0	0	530	1.63663
8.3484	0	535	0	525	0	525	0	535	0	530	0	525	0	535	0	530	0	0	530	1.63663
8.3594	0	535	0	525	0	525	0	535	0	530	0	525	0	535	0	530	0	0	530	1.63663
8.3705	0	535	0	525	0	525	0	535	0	530	0	525	0	535	0	530	0	0	530	1.63663
8.3815	0	535	0	525	0	525	0	535	0	530	0	525	0	535	0	530	0	0	530	1.63663
8.3926	0	535	0	525	0	525	0	535	0	530	0	525	0	535	0	530	0	0	530	1.63663
8.4036	0	535	0	525	0	525	0	535	0	530	0	525	0	535	0	530	0	0	530	1.63663
8.4147	0	535	0	525	0	525	0	535	0	530	0	525	0	535	0	530	0	0	530	1.63663
8.4257	0	535	0	525	0	525	0	535	0	530	0	525	0	535	0	530	0	0	530	1.63663
8.4367	0	535	0	525	0	525	0	535	0	530	0	525	0	535	0	530	0	0	530	1.63663
8.4478	0	535	0	525	0	525	0	535	0	530	0	525	0	535	0	530	0	0	530	1.63663
8.4588	0	535	0	525	0	525	0	535	0	530	0	525	0	535	0	530	0	0	530	1.63663
8.4699	0	535	0	525	0	525	0	535	0	530	0	525	0	535	0	530	0	0	530	1.63663
8.4809	0	535	0	525	0	525	0	535	0	530	0	525	0	535	0	530	0	0	530	1.63663
8.492	0	535	0	525	0	525	0	535	0	530	0	525	0	535	0	530	0	0	530	1.63663
8.503	0	535	0	525	0	525	0	535	0	530	0	525	0	535	0	530	0	0	530	1.63663
8.514	0	535	0	525	0	525	0	535	0	530	0	525	0	535	0	530	0	0	530	1.63663
8.5251	0	535	0	525	0	525	0	535	0	530	0	525	0	535	0	530	0	0	530	1.63663
8.5361	0	535	0	525	0	525	0	535	0	530	0	525	0	535	0	530	0	0	530	1.63663
8.5472	0	535	0	525	0	525	0	535	0	530	0	525	0	535	0	530	0	0	530	1.63663
8.5582	0	535	0	525	0	525	0	535	0	530	0	525	0	535	0	530	0	0	530	1.63663
8.5693	0	535	0	525	0	525	0	535	0	530	0	525	0	535	0	530	0	0	530	1.63663
8.5803	0	535	0	525	0	525	0	535	0	530	0	525	0	535	0	530	0	0	530	1.63663
8.5913	0	535	0	525	0	525	0	535	0	530	0	525	0	535	0	530	0	0	530	1.63663
8.6024	0	535	0	525	0	525	0	535	0	530	0	525	0	535	0	530	0	0	530	1.63663
8.6134	0	535	0	525	0	525	0	535	0	530	0	525	0	535	0	530	0	0	530	1.63663
8.6245	0	535	0	525	0	525	0	535	0	530	0	525	0	535	0	530	0	0	530	1.63663
8.6355	0	535	0	525	0	525	0	535	0	530	0	525	0	535	0	530	0	0	530	1.63663
8.6466	0	535	0	525	0	525	0	535	0	530	0	525	0	535	0	530	0	0	530	1.63663
8.6576	0	535	0	525	0	525	0	535	0	530	0	525	0	535	0	530	0	0	530	1.63663
8.6686	0	535	0	525	0	525	0	535	0	530	0	525	0	535	0	530	0	0	530	1.63663
8.6797	0	535	0	525	0	525	0	535	0	530	0	525	0	535	0	530	0	0	530	1.63663
8.6907	0	535	0	525	0	525	0	535	0	530	0	525	0	535	0	530	0	0	530	1.63663
8.7018	0	535	0	525	0	525	0	535	0	530	0	525	0	535	0	530	0	0	530	1.63663
8.7128	0	535	0	525	0	525	0	535	0	530	0	525	0	535	0	530	0	0	530	1.63663
8.7239	0	535	0	525	0	525	0	535	0	530	0	525	0	535	0	530	0	0	530	1.63663
8.7349	0	535	0	525	0	525	0	535	0	530	0	525	0	535	0	530	0	0	530	1.63663
8.7459	0	535	0	525	0	525	0	535	0	530	0	525	0	535	0	530	0	0	530	1.63663
8.757	0	535	0	525	0	525	0	535	0	530	0	525	0	535	0	530	0	0	530	1.63663
8.768	0	535	0	525	0	525	0	535	0	530	0	525	0	535	0	530	0	0	530	1.63663
8.7791	0	535	0	525	0	525	0	535	0	530	0	525	0	535	0	530	0	0	530	1.63663
8.7901	0	535	0	525	0	525	0	535	0	530	0	525	0	535	0	530	0	0	530	1.63663
8.8012	0	535	0	525	0	525	0	535	0	530	0	525	0	535	0	530	0	0	530	1.63663
8.8122	0	535	0	525	0	525	0	535	0	530	0	525	0	535	0	530	0	0	530	1.63663
8.8232	0	535	0	525	0	525	0	535	0	530	0	525	0	535	0	530	0	0	530	1.63663
8.8343	0	535	0	525	0	525	0	535	0	530	0	525	0	535	0	530	0	0	530	1.63663
8.8453	0	535	0	525	0	525	0	535	0	530	0	525	0	535	0	530	0	0	530	1.63663
8.8564	0	535	0	525	0	525	0	535	0	530	0	525	0	535	0	530	0	0	530	1.63663
8.8674	0	535	0	525	0	525	0	535	0	530	0	525	0	535	0	530	0	0	530	1.63663
8.8785	0	535	0	525	0	525	0	535	0	530	0	525	0	535	0	530	0	0	530	1.63663
8.8895	0	535	0	525	0	525	0	535	0	530	0	525	0	535	0	530	0	0	530	1.63663
8.9005	0	535	0	525	0	525	0	535	0	530	0	525	0	535	0	530	0	0	530	1.63663
8.9116	0	535	0	525	0	525	0	535	0	530	0	525	0	535	0	530	0	0	530	1.63663
8.9226	0	535	0	525	0	525	0	535	0	530	0	525	0	535	0	530	0	0	530	1.63663
8.9337	0	535	0	525	0	525	0	535	0	530	0	525	0	535	0	530	0	0	530	1.63663
8.9447	0	535	0	525	0	525	0	535	0	530	0	525	0	535	0	530	0	0	530	1.63663
8.9558	0	535	0	525	0	525	0	535	0	530	0	525	0	535	0	530	0	0	530	1.63663
8.9668	0	535	0	525	0	525	0	535	0	530	0	525	0	535	0	530	0	0	530	1.63663
8.9778	0	535	0	525	0	525	0	535	0	530	0	525	0	535	0	530	0	0	530	1.63663
8.9889	0	535	0	525	0	525	0	535	0	530	0	525	0	535	0	530	0	0	530	1.63663
8.9999	0	535	0	525	0	525	0	535	0	530	0	525	0	535	0	530	0	0	530	1.63663
9.011	0	535	0	525	0	525	0	535	0	530	0	525	0	535	0	530	0	0	530	1.63663
9.022	0	535	0	525	0	525	0	535	0	530	0	525	0	535	0	530	0	0	530	1.63663
9.0331	0	535	0	525	0	525	0	535	0	530	0	525	0	535	0	530	0	0	530	1.63663
9.0441	0	535	0	525	0	525	0	535	0	530	0	525	0	535	0	530	0	0	530	1.63663
9.0551	0	535	0	525	0	525	0	535	0	530	0	525	0	535	0	530	0	0	530	1.63663
9.0662	0	535	0	525	0	525	0	535	0	530	0	525	0	535	0	530	0	0	530	1.63663
9.0772	0	535	0	525	0	525	0	535	0	530	0	525	0	535	0	530	0	0	530	1.63663
9.0883	0	535	0	525	0	525	0	535	0	530	0	525	0	535	0	530	0	0	530	1.63663
9.0993	0	535	0	525	0	525	0	535	0	530	0	525	0	535	0	530	0	0	530	1.63663
9.1104	0	535	0	525	0	525	0	535	0	530	0	525	0	535	0	530	0	0	530	1.63663
9.1214	0	535	0	525	0	525	0	535	0	530	0	525	0	535	0	530	0	0	530	1.63663
9.1324	0	535	0	525	0	525	0	535	0	530	0	525	0	535	0	530	0	0	530	1.63663
9.1435	0	535	0	525	0	525	0	535	0	530	0	525	0	535	0	530	0	0	530	1.63663
9.1545	0	535	0	525	0	525	0	535	0	530	0	525	0	535	0	530	0	0	530	1.63663
9.1656	0	535	0	525	0	525	0	535	0	530	0	525	0	535	0	530	0	0	530	1.63663
9.1766	0	535	0	525	0	525	0	535	0	530	0	525	0	535	0	530	0	0	530	1.63663
9.1877	0	535	0	525	0	525	0	535	0	530	0	525	0	535	0	530	0	0	530	1.63663
9.1987	0	535	0	525	0	525	0	535	0	530	0	525	0	535	0	530	0	0	530	1.63663
9.2097	0	535	0	525	0	525	0	535	0	530	0	525	0	535	0	530	0	0	530	1.63663
9.2208	0	535	0	525	0	525	0	535	0	530	0	525	0	535	0	530	0	0	530	1.63663
9.2318	0	535	0	525	0	525	0	535	0	530	0	525	0	535	0	530	0	0	530	1.63663
9.2429	0	535	0	525	0	525	0	535	0	530	0	525	0	535	0	530	0	0	530	1.63663
9.2539	0	535	0	525	0	525	0	535	0	530	0	525	0	535	0	530	0	0	530	1.63663
9.265	0	535	0	525	0	525	0	535	0	530	0	525	0	535	0	530	0	0	530	1.63663
9.276	0	535	0	525	0	525	0	535	0	530	0	525	0	535	0	530	0	0	530	1.63663
9.287	0	535	0	525	0	525	0	535	0	530	0	525	0	535	0	530	0	0	530	1.63663
9.2981	0	535	0	525	0	525	0	535	0	530	0	525	0	535	0	530	0	0	530	1.63663
9.3091	0	535	0	525	0	525	0	535	0	530	0	525	0	535	0	530	0	0	530	1.63663
9.3202	0	535	0	525	0	525	0	535	0	530	0	525	0	535	0	530	0	0	530	1.63663
9.3312	0	535	0	525	0	525	0	535	0	530	0	525	0	535	0	530	0	0	530	1.63663
9.3423	0	535	0	525	0	525	0	535	0	530	0	525	0	535	0	530	0	0	530	1.63663
9.3533	0	535	0	525	0	525	0	535	0	530	0	525	0	535	0	530	0	0	530	1.63663
9.3643	0	535	0	525	0	525	0	535	0	530	0	525	0	535	0	530	0	0	530	1.63663
9.3754	0	535	0	525	0	525	0	535	0	530	0	525	0	535	0	530	0	0	530	1.63663
9.3864	0	535	0	525	0	525	0	535	0	530	0	525	0	535	0	530	0	0	530	1.63663
9.3975	0	535	0	525	0	525	0	535	0	530	0	525	0	535	0	530	0	0	530	1.63663
9.4085	0	535	0	525	0	525	0	535	0	530	0	525	0	535	0	530	0	0	530	1.63663
9.4196	0	535	0	525	0	525	0	535	0	530	0	525	0	535	0	530	0	0	530	1.63663
9.4306	0	535	0	525	0	525	0	535	0	530	0	525	0	535	0	530	0	0	530	1.63663
9.4416	0	535	0	525	0	525	0	535	0	530	0	525	0	535	0	530	0	0	530	1.63663
9.4527	0	535	0	525	0	525	0	535	0	530	0	525	0	535	0	530	0	0	530	1.63663
9.4637	0	535	0	525	0	525	0	535	0	530	0	525	0	535	0	530	0	0	530	1.63663
9.4748	0	535	0	525	0	525	0	535	0	530	0	525	0	535	0	530	0	0	530	1.63663
9.4858	0	535	0	525	0	525	0	535	0	530	0	525	0	535	0	530	0	0	530	1.63663
9.4969	0	535	0	525	0	525	0	535	0	530	0	525	0	535	0	530	0	0	530	1.63663
9.5079	0	535	0	525	0	525	0	535	0	530	0	525	0	535	0	530	0	0	530	1.63663
9.5189	0	535	0	525	0	525	0	535	0	530	0	525	0	535	0	530	0	0	530	1.63663
9.53	0	535	0	525	0	525	0	535	0	530	0	525	0	535	0	530	0	0	530	1.63663
9.541	0	535	0	525	0	525	0	535	0	530	0	525	0	535	0	530	0	0	530	1.63663
9.5521	0	535	0	525	0	525	0	535	0	530	0	525	0	535	0	530	0	0	530	1.63663
9.5631	0	535	0	525	0	525	0	535	0	530	0	525	0	535	0	530	0	0	530	1.63663
9.5742	0	535	0	525	0	525	0	535	0	530	0	525	0	535	0	530	0	0	530	1.63663
9.5852	0	535	0	525	0	525	0	535	0	530	0	525	0	535	0	530	0	0	530	1.63663
9.5962	0	535	0	525	0	525	0	535	0	530	0	525	0	535	0	530	0	0	530	1.63663
9.6073	0	535	0	525	0	525	0	535	0	530	0	525	0	535	0	530	0	0	530	1.63663
9.6183	0	535	0	525	0	525	0	535	0	530	0	525	0	535	0	530	0	0	530	1.63663
9.6294	0	535	0	525	0	525	0	535	0	530	0	525	0	535	0	530	0	0	530	1.63663
9.6404	0	535	0	525	0	525	0	535	0	530	0	525	0	535	0	530	0	0	530	1.63663
9.6515	0	535	0	525	0	525	0	535	0	530	0	525	0	535	0	530	0	0	530	1.63663
9.6625	0	535	0	525	0	525	0	535	0	530	0	525	0	535	0	530	0	0	530	1.63663
9.6735	0	535	0	525	0	525	0	535	0	530	0	525	0	535	0	530	0	0	530	1.63663
9.6846	0	535	0	525	0	525	0	535	0	530	0	525	0	535	0	530	0	0	530	1.63663
9.6956	0	535	0	525	0	525	0	535	0	530	0	525	0	535	0	530	0	0	530	1.63663
9.7067	0	535	0	525	0	525	0	535	0	530	0	525	0	535	0	530	0	0	530	1.63663
9.7177	0	535	0	525	0	525	0	535	0	530	0	525	0	535	0	530	0	0	530	1.63663
9.7288	0	535	0	525	0	525	0	535	0	530	0	525	0	535	0	530	0	0	530	1.63663
9.7398	0	535	0	525	0	525	0	535	0	530	0	525	0	535	0	530	0	0	530	1.63663
9.7508	0	535	0	525	0	525	0	535	0	530	0	525	0	535	0	530	0	0	530	1.63663
9.7619	0	535	0	525	0	525	0	535	0	530	0	525	0	535	0	530	0	0	530	1.63663
9.7729	0	535	0	525	0	525	0	535	0	530	0	525	0	535	0	530	0	0	530	1.63663
9.784	0	535	0	525	0	525	0	535	0	530	0	525	0	535	0	530	0	0	530	1.63663
9.795	0	535	0	525	0	525	0	535	0	530	0	525	0	535	0	530	0	0	530	1.63663
9.8061	0	535	0	525	0	525	0	535	0	530	0	525	0	535	0	530	0	0	530	1.63663
9.8171	0	535	0	525	0	525	0	535	0	530	0	525	0	535	0	530	0	0	530	1.63663
9.8281	0	535	0	525	0	525	0	535	0	530	0	525	0	535	0	530	0	0	530	1.63663
9.8392	0	535	0	525	0	525	0	535	0	530	0	525	0	535	0	530	0	0	530	1.63663
9.8502	0	535	0	525	0	525	0	535	0	530	0	525	0	535	0	530	0	0	530	1.63663
9.8613	0	535	0	525	0	525	0	535	0	530	0	525	0	535	0	530	0	0	530	1.63663
9.8723	0	535	0	525	0	525	0	535	0	530	0	525	0	535	0	530	0	0	530	1.63663
9.8834	0	535	0	525	0	525	0	535	0	530	0	525	0	535	0	530	0	0	530	1.63663
9.8944	0	535	0	525	0	525	0	535	0	530	0	525	0	535	0	530	0	0	530	1.63663
9.9054	0	535	0	525	0	525	0	535	0	530	0	525	0	535	0	530	0	0	530	1.63663
9.9165	0	535	0	525	0	525	0	535	0	530	0	525	0	535	0	530	0	0	530	1.63663
9.9275	0	535	0	525	0	525	0	535	0	530	0	525	0	535	0	530	0	0	530	1.63663
9.9386	0	535	0	525	0	525	0	535	0	530	0	525	0	535	0	530	0	0	530	1.63663
9.9496	0	535	0	525	0	525	0	535	0	530	0	525	0	535	0	530	0	0	530	1.63663
9.9607	0	535	0	525	0	525	0	535	0	530	0	525	0	535	0	530	0	0	530	1.63663
9.9717	0	535	0	525	0	525	0	535	0	530	0	525	0	535	0	530	0	0	530	1.63663
9.9827	0	535	0	525	0	525	0	535	0	530	0	525	0	535	0	530	0	0	530	1.63663
9.9938	0	535	0	525	0	525	0	535	0	530	0	525	0	535	0	530	0	0	530	1.63663
10.0048	0	535	0	525	0	525	0	535	0	530	0	525	0	535	0	530	0	0	530	1.63663
10.0159	0	535	0	525	0	525	0	535	0	530	0	525	0	535	0	530	0	0	530	1.63663
10.0269	0	535	0	525	0	525	0	535	0	530	0	525	0	535	0	530	0	0	530	1.63663
10.038	0	535	0	525	0	525	0	535	0	530	0	525	0	535	0	530	0	0	530	1.63663
10.049	0	535	0	525	0	525	0	535	0	530	0	525	0	535	0	530	0	0	530	1.63663
10.06	0	535	0	525	0	525	0	535	0	530	0	525	0	535	0	530	0	0	530	1.63663
10.0711	0	535	0	525	0	525	0	535	0	530	0	525	0	535	0	530	0	0	530	1.63663
10.0821	0	535	0	525	0	525	0	535	0	530	0	525	0	535	0	530	0	0	530	1.63663
10.0932	0	535	0	525	0	525	0	535	0	530	0	525	0	535	0	530	0	0	530	1.63663
10.1042	0	535	0	525	0	525	0	535	0	530	0	525	0	535	0	530	0	0	530	1.63663
10.1153	0	535	0	525	0	525	0	535	0	530	0	525	0	535	0	530	0	0	530	1.63663
10.1263	0	535	0	525	0	525	0	535	0	530	0	525	0	535	0	530	0	0	530	1.63663
10.1373	0	535	0	525	0	525	0	535	0	530	0	525	0	535	0	530	0	0	530	1.63663
10.1484	0	535	0	525	0	525	0	535	0	530	0	525	0	535	0	530	0	0	530	1.63663
10.1594	0	535	0	525	0	525	0	535	0	530	0	525	0	535	0	530	0	0	530	1.63663
10.1705	0	535	0	525	0	525	0	535	0	530	0	525	0	535	0	530	0	0	530	1.63663
10.1815	0	535	0	525	0	525	0	535	0	530	0	525	0	535	0	530	0	0	530	1.63663
10.1926	0	535	0	525	0	525	0	535	0	530	0	525	0	535	0	530	0	0	530	1.63663
10.2036	0	535	0	525	0	525	0	535	0	530	0	525	0	535	0	530	0	0	530	1.63663
10.2146	0	535	0	525	0	525	0	535	0	530	0	525	0	535	0	530	0	0	530	1.63663
10.2257	0	535	0	525	0	525	0	535	0	530	0	525	0	535	0	530	0	0	530	1.63663
10.2367	0	535	0	525	0	525	0	535	0	530	0	525	0	535	0	530	0	0	530	1.63663
10.2478	0	535	0	525	0	525	0	535	0	530	0	525	0	535	0	530	0	0	530	1.63663
10.2588	0	535	0	525	0	525	0	535	0	530	0	525	0	535	0	530	0	0	530	1.63663
10.2699	0	535	0	525	0	525	0	535	0	530	0	525	0	535	0	530	0	0	530	1.63663
10.2809	0	535	0	525	0	525	0	535	0	530	0	525	0	535	0	530	0	0	530	1.63663
10.2919	0	535	0	525	0	525	0	535	0	530	0	525	0	535	0	530	0	0	530	1.63663
10.303	0	535	0	525	0	525	0	535	0	530	0	525	0	535	0	530	0	0	530	1.63663
10.314	0	535	0	525	0	525	0	535	0	530	0	525	0	535	0	530	0	0	530	1.63663
10.3251	0	535	0	525	0	525	0	535	0	530	0	525	0	535	0	530	0	0	530	1.63663
10.3361	0	535	0	525	0	525	0	535	0	530	0	525	0	535	0	530	0	0	530	1.63663
10.3472	0	535	0	525	0	525	0	535	0	530	0	525	0	535	0	530	0	0	530	1.63663
10.3582	0	535	0	525	0	525	0	535	0	530	0	525	0	535	0	530	0	0	530	1.63663
10.3692	0	535	0	525	0	525	0	535	0	530	0	525	0	535	0	530	0	0	530	1.63663
10.3803	0	535	0	525	0	525	0	535	0	530	0	525	0	535	0	530	0	0	530	1.63663
10.3913	0	535	0	525	0	525	0	535	0	530	0	525	0	535	0	530	0	0	530	1.63663
10.4024	0	535	0	525	0	525	0	535	0	530	0	525	0	535	0	530	0	0	530	1.63663
10.4134	0	535	0	525	0	525	0	535	0	530	0	525	0	535	0	530	0	0	530	1.63663
10.4245	0	535	0	525	0	525	0	535	0	530	0	525	0	535	0	530	0	0	530	1.63663
10.4355	0	535	0	525	0	525	0	535	0	530	0	525	0	535	0	530	0	0	530	1.63663
10.4465	0	535	0	525	0	525	0	535	0	530	0	525	0	535	0	530	0	0	530	1.63663
10.4576	0	535	0	525	0	525	0	535	0	530	0	525	0	535	0	530	0	0	530	1.63663
10.4686	0	535	0	525	0	525	0	535	0	530	0	525	0	535	0	530	0	0	530	1.63663
10.4797	0	535	0	525	0	525	0	535	0	530	0	525	0	535	0	530	0	0	530	1.63663
10.4907	0	535	0	525	0	525	0	535	0	530	0	525	0	535	0	530	0	0	530	1.63663
10.5018	0	535	0	525	0	525	0	535	0	530	0	525	0	535	0	530	0	0	530	1.63663
10.5128	0	535	0	525	0	525	0	535	0	530	0	525	0	535	0	530	0	0	530	1.63663
10.5238	0	535	0	525	0	525	0	535	0	530	0	525	0	535	0	530	0	0	530	1.63663
10.5349	0	535	0	525	0	525	0	535	0	530	0	525	0	535	0	530	0	0	530	1.63663
10.5459	0	535	0	525	0	525	0	535	0	530	0	525	0	535	0	530	0	0	530	1.63663
10.557	0	535	0	525	0	525	0	535	0	530	0	525	0	535	0	530	0	0	530	1.63663
10.568	0	535	0	525	0	525	0	535	0	530	0	525	0	535	0	530	0	0	530	1.63663
10.5791	0	535	0	525	0	525	0	535	0	530	0	525	0	535	0	530	0	0	530	1.63663
10.5901	0	535	0	525	0	525	0	535	0	530	0	525	0	535	0	530	0	0	530	1.63663
10.6011	0	535	0	525	0	525	0	535	0	530	0	525	0	535	0	530	0	0	530	1.63663
10.6122	0	535	0	525	0	525	0	535	0	530	0	525	0	535	0	530	0	0	530	1.63663
10.6232	0	535	0	525	0	525	0	535	0	530	0	525	0	535	0	530	0	0	530	1.63663
10.6343	0	535	0	525	0	525	0	535	0	530	0	525	0	535	0	530	0	0	530	1.63663
10.6453	0	535	0	525	0	525	0	535	0	530	0	525	0	535	0	530	0	0	530	1.63663
10.6564	0	535	0	525	0	525	0	535	0	530	0	525	0	535	0	530	0	0	530	1.63663
10.6674	0	535	0	525	0	525	0	535	0	530	0	525	0	535	0	530	0	0	530	1.63663
10.6784	0	535	0	525	0	525	0	535	0	530	0	525	0	535	0	530	0	0	530	1.63663
10.6895	0	535	0	525	0	525	0	535	0	530	0	525	0	535	0	530	0	0	530	1.63663
10.7005	0	535	0	525	0	525	0	535	0	530	0	525	0	535	0	530	0	0	530	1.63663
10.7116	0	535	0	525	0	525	0	535	0	530	0	525	0	535	0	530	0	0	530	1.63663
10.7226	0	535	0	525	0	525	0	535	0	530	0	525	0	535	0	530	0	0	530	1.63663
10.7337	0	535	0	525	0	525	0	535	0	530	0	525	0	535	0	530	0	0	530	1.63663
10.7447	0	535	0	525	0	525	0	535	0	530	0	525	0	535	0	530	0	0	530	1.63663
10.7557	0	535	0	525	0	525	0	535	0	530	0	525	0	535	0	530	0	0	530	1.63663
10.7668	0	535	0	525	0	525	0	535	0	530	0	525	0	535	0	530	0	0	530	1.63663
10.7778	0	535	0	525	0	525	0	535	0	530	0	525	0	535	0	530	0	0	530	1.63663
10.7889	0	535	0	525	0	525	0	535	0	530	0	525	0	535	0	530	0	0	530	1.63663
10.7999	0	535	0	525	0	525	0	535	0	530	0	525	0	535	0	530	0	0	530	1.63663
10.811	0	535	0	525	0	525	0	535	0	530	0	525	0	535	0	530	0	0	530	1.63663
10.822	0	535	0	525	0	525	0	535	0	530	0	525	0	535	0	530	0	0	530	1.63663
10.833	0	535	0	525	0	525	0	535	0	530	0	525	0	535	0	530	0	0	530	1.63663
10.8441	0	535	0	525	0	525	0	535	0	530	0	525	0	535	0	530	0	0	530	1.63663
10.8551	0	535	0	525	0	525	0	535	0	530	0	525	0	535	0	530	0	0	530	1.63663
10.8662	0	535	0	525	0	525	0	535	0	530	0	525	0	535	0	530	0	0	530	1.63663
10.8772	0	535	0	525	0	525	0	535	0	530	0	525	0	535	0	530	0	0	530	1.63663
10.8883	0	535	0	525	0	525	0	535	0	530	0	525	0	535	0	530	0	0	530	1.63663
10.8993	0	535	0	525	0	525	0	535	0	530	0	525	0	535	0	530	0	0	530	1.63663
10.9103	0	535	0	525	0	525	0	535	0	530	0	525	0	535	0	530	0	0	530	1.63663
10.9214	0	535	0	525	0	525	0	535	0	530	0	525	0	535	0	530	0	0	530	1.63663
10.9324	0	535	0	525	0	525	0	535	0	530	0	525	0	535	0	530	0	0	530	1.63663
10.9435	0	535	0	525	0	525	0	535	0	530	0	525	0	535	0	530	0	0	530	1.63663
10.9545	0	535	0	525	0	525	0	535	0	530	0	525	0	535	0	530	0	0	530	1.63663
10.9656	0	535	0	525	0	525	0	535	0	530	0	525	0	535	0	530	0	0	530	1.63663
10.9766	0	535	0	525	0	525	0	535	0	530	0	525	0	535	0	530	0	0	530	1.63663
10.9876	0	535	0	525	0	525	0	535	0	530	0	525	0	535	0	530	0	0	530	1.63663
10.9987	0	535	0	525	0	525	0	535	0	530	0	525	0	535	0	530	0	0	530	1.63663
11.0097	0	535	0	525	0	525	0	535	0	530	0	525	0	535	0	530	0	0	530	1.63663
11.0208	0	535	0	525	0	525	0	535	0	530	0	525	0	535	0	530	0	0	530	1.63663
11.0318	0	535	0	525	0	525	0	535	0	530	0	525	0	535	0	530	0	0	530	1.63663
11.0429	0	535	0	525	0	525	0	535	0	530	0	525	0	535	0	530	0	0	530	1.63663
11.0539	0	535	0	525	0	525	0	535	0	530	0	525	0	535	0	530	0	0	530	1.63663
11.0649	0	535	0	525	0	525	0	535	0	530	0	525	0	535	0	530	0	0	530	1.63663
11.076	0	535	0	525	0	525	0	535	0	530	0	525	0	535	0	530	0	0	530	1.63663
11.087	0	535	0	525	0	525	0	535	0	530	0	525	0	535	0	530	0	0	530	1.63663
11.0981	0	535	0	525	0	525	0	535	0	530	0	525	0	535	0	530	0	0	530	1.63663
11.1091	0	535	0	525	0	525	0	535	0	530	0	525	0	535	0	530	0	0	530	1.63663
11.1202	0	535	0	525	0	525	0	535	0	530	0	525	0	535	0	530	0	0	530	1.63663
11.1312	0	535	0	525	0	525	0	535	0	530	0	525	0	535	0	530	0	0	530	1.63663
11.1422	0	535	0	525	0	525	0	535	0	530	0	525	0	535	0	530	0	0	530	1.63663
11.1533	0	535	0	525	0	525	0	535	0	530	0	525	0	535	0	530	0	0	530	1.63663
11.1643	0	535	0	525	0	525	0	535	0	530	0	525	0	535	0	530	0	0	530	1.63663
11.1754	0	535	0	525	0	525	0	535	0	530	0	525	0	535	0	530	0	0	530	1.63663
11.1864	0	535	0	525	0	525	0	535	0	530	0	525	0	535	0	530	0	0	530	1.63663
11.1975	0	535	0	525	0	525	0	535	0	530	0	525	0	535	0	530	0	0	530	1.63663
11.2085	0	535	0	525	0	525	0	535	0	530	0	525	0	535	0	530	0	0	530	1.63663
11.2195	0	535	0	525	0	525	0	535	0	530	0	525	0	535	0	530	0	0	530	1.63663
11.2306	0	535	0	525	0	525	0	535	0	530	0	525	0	535	0	530	0	0	530	1.63663
11.2416	0	535	0	525	0	525	0	535	0	530	0	525	0	535	0	530	0	0	530	1.63663
11.2527	0	535	0	525	0	525	0	535	0	530	0	525	0	535	0	530	0	0	530	1.63663
11.2637	0	535	0	525	0	525	0	535	0	530	0	525	0	535	0	530	0	0	530	1.63663
11.2748	0	535	0	525	0	525	0	535	0	530	0	525	0	535	0	530	0	0	530	1.63663
11.2858	0	535	0	525	0	525	0	535	0	530	0	525	0	535	0	530	0	0	530	1.63663
11.2968	0	535	0	525	0	525	0	535	0	530	0	525	0	535	0	530	0	0	530	1.63663
11.3079	0	535	0	525	0	525	0	535	0	530	0	525	0	535	0	530	0	0	530	1.63663
11.3189	0	535	0	525	0	525	0	535	0	530	0	525	0	535	0	530	0	0	530	1.63663
11.33	0	535	0	525	0	525	0	535	0	530	0	525	0	535	0	530	0	0	530	1.63663
11.341	0	535	0	525	0	525	0	535	0	530	0	525	0	535	0	530	0	0	530	1.63663
11.3521	0	535	0	525	0	525	0	535	0	530	0	525	0	535	0	530	0	0	530	1.63663
11.3631	0	535	0	525	0	525	0	535	0	530	0	525	0	535	0	530	0	0	530	1.63663
11.3741	0	535	0	525	0	525	0	535	0	530	0	525	0	535	0	530	0	0	530	1.63663
11.3852	0	535	0	525	0	525	0	535	0	530	0	525	0	535	0	530	0	0	530	1.63663
11.3962	0	535	0	525	0	525	0	535	0	530	0	525	0	535	0	530	0	0	530	1.63663
11.4073	0	535	0	525	0	525	0	535	0	530	0	525	0	535	0	530	0	0	530	1.63663
11.4183	0	535	0	525	0	525	0	535	0	530	0	525	0	535	0	530	0	0	530	1.63663
11.4294	0	535	0	525	0	525	0	535	0	530	0	525	0	535	0	530	0	0	530	1.63663
11.4404	0	535	0	525	0	525	0	535	0	530	0	525	0	535	0	530	0	0	530	1.63663
11.4514	0	535	0	525	0	525	0	535	0	530	0	525	0	535	0	530	0	0	530	1.63663
11.4625	0	535	0	525	0	525	0	535	0	530	0	525	0	535	0	530	0	0	530	1.63663
11.4735	0	535	0	525	0	525	0	535	0	530	0	525	0	535	0	530	0	0	530	1.63663
11.4846	0	535	0	525	0	525	0	535	0	530	0	525	0	535	0	530	0	0	530	1.63663
11.4956	0	535	0	525	0	525	0	535	0	530	0	525	0	535	0	530	0	0	530	1.63663
11.5067	0	535	0	525	0	525	0	535	0	530	0	525	0	535	0	530	0	0	530	1.63663
11.5177	0	535	0	525	0	525	0	535	0	530	0	525	0	535	0	530	0	0	530	1.63663
11.5287	0	535	0	525	0	525	0	535	0	530	0	525	0	535	0	530	0	0	530	1.63663
11.5398	0	535	0	525	0	525	0	535	0	530	0	525	0	535	0	530	0	0	530	1.63663
11.5508	0	535	0	525	0	525	0	535	0	530	0	525	0	535	0	530	0	0	530	1.63663
11.5619	0	535	0	525	0	525	0	535	0	530	0	525	0	535	0	530	0	0	530	1.63663
11.5729	0	535	0	525	0	525	0	535	0	530	0	525	0	535	0	530	0	0	530	1.63663
11.584	0	535	0	525	0	525	0	535	0	530	0	525	0	535	0	530	0	0	530	1.63663
11.595	0	535	0	525	0	525	0	535	0	530	0	525	0	535	0	530	0	0	530	1.63663
11.606	0	535	0	525	0	525	0	535	0	530	0	525	0	535	0	530	0	0	530	1.63663
11.6171	0	535	0	525	0	525	0	535	0	530	0	525	0	535	0	530	0	0	530	1.63663
11.6281	0	535	0	525	0	525	0	535	0	530	0	525	0	535	0	530	0	0	530	1.63663
11.6392	0	535	0	525	0	525	0	535	0	530	0	525	0	535	0	530	0	0	530	1.63663
11.6502	0	535	0	525	0	525	0	535	0	530	0	525	0	535	0	530	0	0	530	1.63663
11.6613	0	535	0	525	0	525	0	535	0	530	0	525	0	535	0	530	0	0	530	1.63663
11.6723	0	535	0	525	0	525	0	535	0	530	0	525	0	535	0	530	0	0	530	1.63663
11.6833	0	535	0	525	0	525	0	535	0	530	0	525	0	535	0	530	0	0	530	1.63663
11.6944	0	535	0	525	0	525	0	535	0	530	0	525	0	535	0	530	0	0	530	1.63663
11.7054	0	535	0	525	0	525	0	535	0	530	0	525	0	535	0	530	0	0	530	1.63663
11.7165	0	535	0	525	0	525	0	535	0	530	0	525	0	535	0	530	0	0	530	1.63663
11.7275	0	535	0	525	0	525	0	535	0	530	0	525	0	535	0	530	0	0	530	1.63663
11.7386	0	535	0	525	0	525	0	535	0	530	0	525	0	535	0	530	0	0	530	1.63663
11.7496	0	535	0	525	0	525	0	535	0	530	0	525	0	535	0	530	0	0	530	1.63663
11.7606	0	535	0	525	0	525	0	535	0	530	0	525	0	535	0	530	0	0	530	1.63663
11.7717	0	535	0	525	0	525	0	535	0	530	0	525	0	535	0	530	0	0	530	1.63663
11.7827	0	535	0	525	0	525	0	535	0	530	0	525	0	535	0	530	0	0	530	1.63663
11.7938	0	535	0	525	0	525	0	535	0	530	0	525	0	535	0	530	0	0	530	1.63663
11.8048	0	535	0	525	0	525	0	535	0	530	0	525	0	535	0	530	0	0	530	1.63663
11.8159	0	535	0	525	0	525	0	535	0	530	0	525	0	535	0	530	0	0	530	1.63663
11.8269	0	535	0	525	0	525	0	535	0	530	0	525	0	535	0	530	0	0	530	1.63663
11.8379	0	535	0	525	0	525	0	535	0	530	0	525	0	535	0	530	0	0	530	1.63663
11.849	0	535	0	525	0	525	0	535	0	530	0	525	0	535	0	530	0	0	530	1.63663
11.86	0	535	0	525	0	525	0	535	0	530	0	525	0	535	0	530	0	0	530	1.63663
11.8711	0	535	0	525	0	525	0	535	0	530	0	525	0	535	0	530	0	0	530	1.63663
11.8821	0	535	0	525	0	525	0	535	0	530	0	525	0	535	0	530	0	0	530	1.63663
11.8932	0	535	0	525	0	525	0	535	0	530	0	525	0	535	0	530	0	0	530	1.63663
11.9042	0	535	0	525	0	525	0	535	0	530	0	525	0	535	0	530	0	0	530	1.63663
11.9152	0	535	0	525	0	525	0	535	0	530	0	525	0	535	0	530	0	0	530	1.63663
11.9263	0	535	0	525	0	525	0	535	0	530	0	525	0	535	0	530	0	0	530	1.63663
11.9373	0	535	0	525	0	525	0	535	0	530	0	525	0	535	0	530	0	0	530	1.63663
11.9484	0	535	0	525	0	525	0	535	0	530	0	525	0	535	0	530	0	0	530	1.63663
11.9594	0	535	0	525	0	525	0	535	0	530	0	525	0	535	0	530	0	0	530	1.63663
11.9705	0	535	0	525	0	525	0	535	0	530	0	525	0	535	0	530	0	0	530	1.63663
11.9815	0	535	0	525	0	525	0	535	0	530	0	525	0	535	0	530	0	0	530	1.63663
11.9925	0	535	0	525	0	525	0	535	0	530	0	525	0	535	0	530	0	0	530	1.63663
12.0036	0	535	0	525	0	525	0	535	0	530	0	525	0	535	0	530	0	0	530	1.63663
12.0146	0	535	0	525	0	525	0	535	0	530	0	525	0	535	0	530	0	0	530	1.63663
12.0257	0	535	0	525	0	525	0	535	0	530	0	525	0	535	0	530	0	0	530	1.63663
12.0367	0	535	0	525	0	525	0	535	0	530	0	525	0	535	0	530	0	0	530	1.63663
12.0478	0	535	0	525	0	525	0	535	0	530	0	525	0	535	0	530	0	0	530	1.63663
12.0588	0	535	0	525	0	525	0	535	0	530	0	525	0	535	0	530	0	0	530	1.63663
12.0698	0	535	0	525	0	525	0	535	0	530	0	525	0	535	0	530	0	0	530	1.63663
12.0809	0	535	0	525	0	525	0	535	0	530	0	525	0	535	0	530	0	0	530	1.63663
12.0919	0	535	0	525	0	525	0	535	0	530	0	525	0	535	0	530	0	0	530	1.63663
12.103	0	535	0	525	0	525	0	535	0	530	0	525	0	535	0	530	0	0	530	1.63663
12.114	0	535	0	525	0	525	0	535	0	530	0	525	0	535	0	530	0	0	530	1.63663
12.1251	0	535	0	525	0	525	0	535	0	530	0	525	0	535	0	530	0	0	530	1.63663
12.1361	0	535	0	525	0	525	0	535	0	530	0	525	0	535	0	530	0	0	530	1.63663
12.1471	0	535	0	525	0	525	0	535	0	530	0	525	0	535	0	530	0	0	530	1.63663
12.1582	0	535	0	525	0	525	0	535	0	530	0	525	0	535	0	530	0	0	530	1.63663
12.1692	0	535	0	525	0	525	0	535	0	530	0	525	0	535	0	530	0	0	530	1.63663
12.1803	0	535	0	525	0	525	0	535	0	530	0	525	0	535	0	530	0	0	530	1.63663
12.1913	0	535	0	525	0	525	0	535	0	530	0	525	0	535	0	530	0	0	530	1.63663
12.2024	0	535	0	525	0	525	0	535	0	530	0	525	0	535	0	530	0	0	530	1.63663
12.2134	0	535	0	525	0	525	0	535	0	530	0	525	0	535	0	530	0	0	530	1.63663
12.2244	0	535	0	525	0	525	0	535	0	530	0	525	0	535	0	530	0	0	530	1.63663
12.2355	0	535	0	525	0	525	0	535	0	530	0	525	0	535	0	530	0	0	530	1.63663
12.2465	0	535	0	525	0	525	0	535	0	530	0	525	0	535	0	530	0	0	530	1.63663
12.2576	0	535	0	525	0	525	0	535	0	530	0	525	0	535	0	530	0	0	530	1.63663
12.2686	0	535	0	525	0	525	0	535	0	530	0	525	0	535	0	530	0	0	530	1.63663
12.2797	0	535	0	525	0	525	0	535	0	530	0	525	0	535	0	530	0	0	530	1.63663
12.2907	0	535	0	525	0	525	0	535	0	530	0	525	0	535	0	530	0	0	530	1.63663
12.3017	0	535	0	525	0	525	0	535	0	530	0	525	0	535	0	530	0	0	530	1.63663
12.3128	0	535	0	525	0	525	0	535	0	530	0	525	0	535	0	530	0	0	530	1.63663
12.3238	0	535	0	525	0	525	0	535	0	530	0	525	0	535	0	530	0	0	530	1.63663
12.3349	0	535	0	525	0	525	0	535	0	530	0	525	0	535	0	530	0	0	530	1.63663
12.3459	0	535	0	525	0	525	0	535	0	530	0	525	0	535	0	530	0	0	530	1.63663
12.357	0	535	0	525	0	525	0	535	0	530	0	525	0	535	0	530	0	0	530	1.63663
12.368	0	535	0	525	0	525	0	535	0	530	0	525	0	535	0	530	0	0	530	1.63663
12.379	0	535	0	525	0	525	0	535	0	530	0	525	0	535	0	530	0	0	530	1.63663
12.3901	0	535	0	525	0	525	0	535	0	530	0	525	0	535	0	530	0	0	530	1.63663
12.4011	0	535	0	525	0	525	0	535	0	530	0	525	0	535	0	530	0	0	530	1.63663
12.4122	0	535	0	525	0	525	0	535	0	530	0	525	0	535	0	530	0	0	530	1.63663
12.4232	0	535	0	525	0	525	0	535	0	530	0	525	0	535	0	530	0	0	530	1.63663
12.4343	0	535	0	525	0	525	0	535	0	530	0	525	0	535	0	530	0	0	530	1.63663
12.4453	0	535	0	525	0	525	0	535	0	530	0	525	0	535	0	530	0	0	530	1.63663
12.4563	0	535	0	525	0	525	0	535	0	530	0	525	0	535	0	530	0	0	530	1.63663
12.4674	0	535	0	525	0	525	0	535	0	530	0	525	0	535	0	530	0	0	530	1.63663
12.4784	0	535	0	525	0	525	0	535	0	530	0	525	0	535	0	530	0	0	530	1.63663
12.4895	0	535	0	525	0	525	0	535	0	530	0	525	0	535	0	530	0	0	530	1.63663
12.5005	0	535	0	525	0	525	0	535	0	530	0	525	0	535	0	530	0	0	530	1.63663
12.5116	0	535	0	525	0	525	0	535	0	530	0	525	0	535	0	530	0	0	530	1.63663
12.5226	0	535	0	525	0	525	0	535	0	530	0	525	0	535	0	530	0	0	530	1.63663
12.5336	0	535	0	525	0	525	0	535	0	530	0	525	0	535	0	530	0	0	530	1.63663
12.5447	0	535	0	525	0	525	0	535	0	530	0	525	0	535	0	530	0	0	530	1.63663
12.5557	0	535	0	525	0	525	0	535	0	530	0	525	0	535	0	530	0	0	530	1.63663
12.5668	0	535	0	525	0	525	0	535	0	530	0	525	0	535	0	530	0	0	530	1.63663
12.5778	0	535	0	525	0	525	0	535	0	530	0	525	0	535	0	530	0	0	530	1.63663
12.5889	0	535	0	525	0	525	0	535	0	530	0	525	0	535	0	530	0	0	530	1.63663
12.5999	0	535	0	525	0	525	0	535	0	530	0	525	0	535	0	530	0	0	530	1.63663
12.6109	0	535	0	525	0	525	0	535	0	530	0	525	0	535	0	530	0	0	530	1.63663
12.622	0	535	0	525	0	525	0	535	0	530	0	525	0	535	0	530	0	0	530	1.63663
12.633	0	535	0	525	0	525	0	535	0	530	0	525	0	535	0	530	0	0	530	1.63663
12.6441	0	535	0	525	0	525	0	535	0	530	0	525	0	535	0	530	0	0	530	1.63663
12.6551	0	535	0	525	0	525	0	535	0	530	0	525	0	535	0	530	0	0	530	1.63663
12.6662	0	535	0	525	0	525	0	535	0	530	0	525	0	535	0	530	0	0	530	1.63663
12.6772	0	535	0	525	0	525	0	535	0	530	0	525	0	535	0	530	0	0	530	1.63663
12.6882	0	535	0	525	0	525	0	535	0	530	0	525	0	535	0	530	0	0	530	1.63663
12.6993	0	535	0	525	0	525	0	535	0	530	0	525	0	535	0	530	0	0	530	1.63663
12.7103	0	535	0	525	0	525	0	535	0	530	0	525	0	535	0	530	0	0	530	1.63663
12.7214	0	535	0	525	0	525	0	535	0	530	0	525	0	535	0	530	0	0	530	1.63663
12.7324	0	535	0	525	0	525	0	535	0	530	0	525	0	535	0	530	0	0	530	1.63663
12.7435	0	535	0	525	0	525	0	535	0	530	0	525	0	535	0	530	0	0	530	1.63663
12.7545	0	535	0	525	0	525	0	535	0	530	0	525	0	535	0	530	0	0	530	1.63663
12.7655	0	535	0	525	0	525	0	535	0	530	0	525	0	535	0	530	0	0	530	1.63663
12.7766	0	535	0	525	0	525	0	535	0	530	0	525	0	535	0	530	0	0	530	1.63663
12.7876	0	535	0	525	0	525	0	535	0	530	0	525	0	535	0	530	0	0	530	1.63663
12.7987	0	535	0	525	0	525	0	535	0	530	0	525	0	535	0	530	0	0	530	1.63663
12.8097	0	535	0	525	0	525	0	535	0	530	0	525	0	535	0	530	0	0	530	1.63663
12.8208	0	535	0	525	0	525	0	535	0	530	0	525	0	535	0	530	0	0	530	1.63663
12.8318	0	535	0	525	0	525	0	535	0	530	0	525	0	535	0	530	0	0	530	1.63663
12.8428	0	535	0	525	0	525	0	535	0	530	0	525	0	535	0	530	0	0	530	1.63663
12.8539	0	535	0	525	0	525	0	535	0	530	0	525	0	535	0	530	0	0	530	1.63663
12.8649	0	535	0	525	0	525	0	535	0	530	0	525	0	535	0	530	0	0	530	1.63663
12.876	0	535	0	525	0	525	0	535	0	530	0	525	0	535	0	530	0	0	530	1.63663
12.887	0	535	0	525	0	525	0	535	0	530	0	525	0	535	0	530	0	0	530	1.63663
12.8981	0	535	0	525	0	525	0	535	0	530	0	525	0	535	0	530	0	0	530	1.63663
12.9091	0	535	0	525	0	525	0	535	0	530	0	525	0	535	0	530	0	0	530	1.63663
12.9201	0	535	0	525	0	525	0	535	0	530	0	525	0	535	0	530	0	0	530	1.63663
12.9312	0	535	0	525	0	525	0	535	0	530	0	525	0	535	0	530	0	0	530	1.63663
12.9422	0	535	0	525	0	525	0	535	0	530	0	525	0	535	0	530	0	0	530	1.63663
12.9533	0	535	0	525	0	525	0	535	0	530	0	525	0	535	0	530	0	0	530	1.63663
12.9643	0	535	0	525	0	525	0	535	0	530	0	525	0	535	0	530	0	0	530	1.63663
12.9754	0	535	0	525	0	525	0	535	0	530	0	525	0	535	0	530	0	0	530	1.63663
12.9864	0	535	0	525	0	525	0	535	0	530	0	525	0	535	0	530	0	0	530	1.63663
12.9974	0	535	0	525	0	525	0	535	0	530	0	525	0	535	0	530	0	0	530	1.63663
13.0085	0	535	0	525	0	525	0	535	0	530	0	525	0	535	0	530	0	0	530	1.63663
13.0195	0	535	0	525	0	525	0	535	0	530	0	525	0	535	0	530	0	0	530	1.63663
13.0306	0	535	0	525	0	525	0	535	0	530	0	525	0	535	0	530	0	0	530	1.63663
13.0416	0	535	0	525	0	525	0	535	0	530	0	525	0	535	0	530	0	0	530	1.63663
13.0527	0	535	0	525	0	525	0	535	0	530	0	525	0	535	0	530	0	0	530	1.63663
13.0637	0	535	0	525	0	525	0	535	0	530	0	525	0	535	0	530	0	0	530	1.63663
13.0747	0	535	0	525	0	525	0	535	0	530	0	525	0	535	0	530	0	0	530	1.63663
13.0858	0	535	0	525	0	525	0	535	0	530	0	525	0	535	0	530	0	0	530	1.63663
13.0968	0	535	0	525	0	525	0	535	0	530	0	525	0	535	0	530	0	0	530	1.63663
13.1079	0	535	0	525	0	525	0	535	0	530	0	525	0	535	0	530	0	0	530	1.63663
13.1189	0	535	0	525	0	525	0	535	0	530	0	525	0	535	0	530	0	0	530	1.63663
13.13	0	535	0	525	0	525	0	535	0	530	0	525	0	535	0	530	0	0	530	1.63663
13.141	0	535	0	525	0	525	0	535	0	530	0	525	0	535	0	530	0	0	530	1.63663
13.152	0	535	0	525	0	525	0	535	0	530	0	525	0	535	0	530	0	0	530	1.63663
13.1631	0	535	0	525	0	525	0	535	0	530	0	525	0	535	0	530	0	0	530	1.63663
13.1741	0	535	0	525	0	525	0	535	0	530	0	525	0	535	0	530	0	0	530	1.63663
13.1852	0	535	0	525	0	525	0	535	0	530	0	525	0	535	0	530	0	0	530	1.63663
13.1962	0	535	0	525	0	525	0	535	0	530	0	525	0	535	0	530	0	0	530	1.63663
13.2073	0	535	0	525	0	525	0	535	0	530	0	525	0	535	0	530	0	0	530	1.63663
13.2183	0	535	0	525	0	525	0	535	0	530	0	525	0	535	0	530	0	0	530	1.63663
13.2293	0	535	0	525	0	525	0	535	0	530	0	525	0	535	0	530	0	0	530	1.63663
13.2404	0	535	0	525	0	525	0	535	0	530	0	525	0	535	0	530	0	0	530	1.63663
13.2514	0	535	0	525	0	525	0	535	0	530	0	525	0	535	0	530	0	0	530	1.63663
13.2625	0	535	0	525	0	525	0	535	0	530	0	525	0	535	0	530	0	0	530	1.63663
13.2735	0	535	0	525	0	525	0	535	0	530	0	525	0	535	0	530	0	0	530	1.63663
13.2846	0	535	0	525	0	525	0	535	0	530	0	525	0	535	0	530	0	0	530	1.63663
13.2956	0	535	0	525	0	525	0	535	0	530	0	525	0	535	0	530	0	0	530	1.63663
13.3066	0	535	0	525	0	525	0	535	0	530	0	525	0	535	0	530	0	0	530	1.63663
13.3177	0	535	0	525	0	525	0	535	0	530	0	525	0	535	0	530	0	0	530	1.63663
13.3287	0	535	0	525	0	525	0	535	0	530	0	525	0	535	0	530	0	0	530	1.63663
13.3398	0	535	0	525	0	525	0	535	0	530	0	525	0	535	0	530	0	0	530	1.63663
13.3508	0	535	0	525	0	525	0	535	0	530	0	525	0	535	0	530	0	0	530	1.63663
13.3619	0	535	0	525	0	525	0	535	0	530	0	525	0	535	0	530	0	0	530	1.63663
13.3729	0	535	0	525	0	525	0	535	0	530	0	525	0	535	0	530	0	0	530	1.63663
13.3839	0	535	0	525	0	525	0	535	0	530	0	525	0	535	0	530	0	0	530	1.63663
13.395	0	535	0	525	0	525	0	535	0	530	0	525	0	535	0	530	0	0	530	1.63663
13.406	0	535	0	525	0	525	0	535	0	530	0	525	0	535	0	530	0	0	530	1.63663
13.4171	0	535	0	525	0	525	0	535	0	530	0	525	0	535	0	530	0	0	530	1.63663
13.4281	0	535	0	525	0	525	0	535	0	530	0	525	0	535	0	530	0	0	530	1.63663
13.4392	0	535	0	525	0	525	0	535	0	530	0	525	0	535	0	530	0	0	530	1.63663
13.4502	0	535	0	525	0	525	0	535	0	530	0	525	0	535	0	530	0	0	530	1.63663
13.4612	0	535	0	525	0	525	0	535	0	530	0	525	0	535	0	530	0	0	530	1.63663
13.4723	0	535	0	525	0	525	0	535	0	530	0	525	0	535	0	530	0	0	530	1.63663
13.4833	0	535	0	525	0	525	0	535	0	530	0	525	0	535	0	530	0	0	530	1.63663
13.4944	0	535	0	525	0	525	0	535	0	530	0	525	0	535	0	530	0	0	530	1.63663
13.5054	0	535	0	525	0	525	0	535	0	530	0	525	0	535	0	530	0	0	530	1.63663
13.5165	0	535	0	525	0	525	0	535	0	530	0	525	0	535	0	530	0	0	530	1.63663
13.5275	0	535	0	525	0	525	0	535	0	530	0	525	0	535	0	530	0	0	530	1.63663
13.5385	0	535	0	525	0	525	0	535	0	530	0	525	0	535	0	530	0	0	530	1.63663
13.5496	0	535	0	525	0	525	0	535	0	530	0	525	0	535	0	530	0	0	530	1.63663
13.5606	0	535	0	525	0	525	0	535	0	530	0	525	0	535	0	530	0	0	530	1.63663
13.5717	0	535	0	525	0	525	0	535	0	530	0	525	0	535	0	530	0	0	530	1.63663
13.5827	0	535	0	525	0	525	0	535	0	530	0	525	0	535	0	530	0	0	530	1.63663
13.5938	0	535	0	525	0	525	0	535	0	530	0	525	0	535	0	530	0	0	530	1.63663
13.6048	0	535	0	525	0	525	0	535	0	530	0	525	0	535	0	530	0	0	530	1.63663
13.6158	0	535	0	525	0	525	0	535	0	530	0	525	0	535	0	530	0	0	530	1.63663
13.6269	0	535	0	525	0	525	0	535	0	530	0	525	0	535	0	530	0	0	530	1.63663
13.6379	0	535	0	525	0	525	0	535	0	530	0	525	0	535	0	530	0	0	530	1.63663
13.649	0	535	0	525	0	525	0	535	0	530	0	525	0	535	0	530	0	0	530	1.63663
13.66	0	535	0	525	0	525	0	535	0	530	0	525	0	535	0	530	0	0	530	1.63663
13.6711	0	535	0	525	0	525	0	535	0	530	0	525	0	535	0	530	0	0	530	1.63663
13.6821	0	535	0	525	0	525	0	535	0	530	0	525	0	535	0	530	0	0	530	1.63663
13.6931	0	535	0	525	0	525	0	535	0	530	0	525	0	535	0	530	0	0	530	1.63663
13.7042	0	535	0	525	0	525	0	535	0	530	0	525	0	535	0	530	0	0	530	1.63663
13.7152	0	535	0	525	0	525	0	535	0	530	0	525	0	535	0	530	0	0	530	1.63663
13.7263	0	535	0	525	0	525	0	535	0	530	0	525	0	535	0	530	0	0	530	1.63663
13.7373	0	535	0	525	0	525	0	535	0	530	0	525	0	535	0	530	0	0	530	1.63663
13.7484	0	535	0	525	0	525	0	535	0	530	0	525	0	535	0	530	0	0	530	1.63663
13.7594	0	535	0	525	0	525	0	535	0	530	0	525	0	535	0	530	0	0	530	1.63663
13.7704	0	535	0	525	0	525	0	535	0	530	0	525	0	535	0	530	0	0	530	1.63663
13.7815	0	535	0	525	0	525	0	535	0	530	0	525	0	535	0	530	0	0	530	1.63663
13.7925	0	535	0	525	0	525	0	535	0	530	0	525	0	535	0	530	0	0	530	1.63663
13.8036	0	535	0	525	0	525	0	535	0	530	0	525	0	535	0	530	0	0	530	1.63663
13.8146	0	535	0	525	0	525	0	535	0	530	0	525	0	535	0	530	0	0	530	1.63663
13.8257	0	535	0	525	0	525	0	535	0	530	0	525	0	535	0	530	0	0	530	1.63663
13.8367	0	535	0	525	0	525	0	535	0	530	0	525	0	535	0	530	0	0	530	1.63663
13.8477	0	535	0	525	0	525	0	535	0	530	0	525	0	535	0	530	0	0	530	1.63663
13.8588	0	535	0	525	0	525	0	535	0	530	0	525	0	535	0	530	0	0	530	1.63663
13.8698	0	535	0	525	0	525	0	535	0	530	0	525	0	535	0	530	0	0	530	1.63663
13.8809	0	535	0	525	0	525	0	535	0	530	0	525	0	535	0	530	0	0	530	1.63663
13.8919	0	535	0	525	0	525	0	535	0	530	0	525	0	535	0	530	0	0	530	1.63663
13.903	0	535	0	525	0	525	0	535	0	530	0	525	0	535	0	530	0	0	530	1.63663
13.914	0	535	0	525	0	525	0	535	0	530	0	525	0	535	0	530	0	0	530	1.63663
13.925	0	535	0	525	0	525	0	535	0	530	0	525	0	535	0	530	0	0	530	1.63663
13.9361	0	535	0	525	0	525	0	535	0	530	0	525	0	535	0	530	0	0	530	1.63663
13.9471	0	535	0	525	0	525	0	535	0	530	0	525	0	535	0	530	0	0	530	1.63663
13.9582	0	535	0	525	0	525	0	535	0	530	0	525	0	535	0	530	0	0	530	1.63663
13.9692	0	535	0	525	0	525	0	535	0	530	0	525	0	535	0	530	0	0	530	1.63663
13.9803	0	535	0	525	0	525	0	535	0	530	0	525	0	535	0	530	0	0	530	1.63663
13.9913	0	535	0	525	0	525	0	535	0	530	0	525	0	535	0	530	0	0	530	1.63663
14.0023	0	535	0	525	0	525	0	535	0	530	0	525	0	535	0	530	0	0	530	1.63663
14.0134	0	535	0	525	0	525	0	535	0	530	0	525	0	535	0	530	0	0	530	1.63663
14.0244	0	535	0	525	0	525	0	535	0	530	0	525	0	535	0	530	0	0	530	1.63663
14.0355	0	535	0	525	0	525	0	535	0	530	0	525	0	535	0	530	0	0	530	1.63663
14.0465	0	535	0	525	0	525	0	535	0	530	0	525	0	535	0	530	0	0	530	1.63663
14.0576	0	535	0	525	0	525	0	535	0	530	0	525	0	535	0	530	0	0	530	1.63663
14.0686	0	535	0	525	0	525	0	535	0	530	0	525	0	535	0	530	0	0	530	1.63663
14.0796	0	535	0	525	0	525	0	535	0	530	0	525	0	535	0	530	0	0	530	1.63663
14.0907	0	535	0	525	0	525	0	535	0	530	0	525	0	535	0	530	0	0	530	1.63663
14.1017	0	535	0	525	0	525	0	535	0	530	0	525	0	535	0	530	0	0	530	1.63663
14.1128	0	535	0	525	0	525	0	535	0	530	0	525	0	535	0	530	0	0	530	1.63663
14.1238	0	535	0	525	0	525	0	535	0	530	0	525	0	535	0	530	0	0	530	1.63663
14.1349	0	535	0	525	0	525	0	535	0	530	0	525	0	535	0	530	0	0	530	1.63663
14.1459	0	535	0	525	0	525	0	535	0	530	0	525	0	535	0	530	0	0	530	1.63663
14.1569	0	535	0	525	0	525	0	535	0	530	0	525	0	535	0	530	0	0	530	1.63663
14.168	0	535	0	525	0	525	0	535	0	530	0	525	0	535	0	530	0	0	530	1.63663
14.179	0	535	0	525	0	525	0	535	0	530	0	525	0	535	0	530	0	0	530	1.63663
14.1901	0	535	0	525	0	525	0	535	0	530	0	525	0	535	0	530	0	0	530	1.63663
14.2011	0	535	0	525	0	525	0	535	0	530	0	525	0	535	0	530	0	0	530	1.63663
14.2122	0	535	0	525	0	525	0	535	0	530	0	525	0	535	0	530	0	0	530	1.63663
14.2232	0	535	0	525	0	525	0	535	0	530	0	525	0	535	0	530	0	0	530	1.63663
14.2342	0	535	0	525	0	525	0	535	0	530	0	525	0	535	0	530	0	0	530	1.63663
14.2453	0	535	0	525	0	525	0	535	0	530	0	525	0	535	0	530	0	0	530	1.63663
14.2563	0	535	0	525	0	525	0	535	0	530	0	525	0	535	0	530	0	0	530	1.63663
14.2674	0	535	0	525	0	525	0	535	0	530	0	525	0	535	0	530	0	0	530	1.63663
14.2784	0	535	0	525	0	525	0	535	0	530	0	525	0	535	0	530	0	0	530	1.63663
14.2895	0	535	0	525	0	525	0	535	0	530	0	525	0	535	0	530	0	0	530	1.63663
14.3005	0	535	0	525	0	525	0	535	0	530	0	525	0	535	0	530	0	0	530	1.63663
14.3115	0	535	0	525	0	525	0	535	0	530	0	525	0	535	0	530	0	0	530	1.63663
14.3226	0	535	0	525	0	525	0	535	0	530	0	525	0	535	0	530	0	0	530	1.63663
14.3336	0	535	0	525	0	525	0	535	0	530	0	525	0	535	0	530	0	0	530	1.63663
14.3447	0	535	0	525	0	525	0	535	0	530	0	525	0	535	0	530	0	0	530	1.63663
14.3557	0	535	0	525	0	525	0	535	0	530	0	525	0	535	0	530	0	0	530	1.63663
14.3668	0	535	0	525	0	525	0	535	0	530	0	525	0	535	0	530	0	0	530	1.63663
14.3778	0	535	0	525	0	525	0	535	0	530	0	525	0	535	0	530	0	0	530	1.63663
14.3888	0	535	0	525	0	525	0	535	0	530	0	525	0	535	0	530	0	0	530	1.63663
14.3999	0	535	0	525	0	525	0	535	0	530	0	525	0	535	0	530	0	0	530	1.63663
14.4109	0	535	0	525	0	525	0	535	0	530	0	525	0	535	0	530	0	0	530	1.63663
14.422	0	535	0	525	0	525	0	535	0	530	0	525	0	535	0	530	0	0	530	1.63663
14.433	0	535	0	525	0	525	0	535	0	530	0	525	0	535	0	530	0	0	530	1.63663
14.4441	0	535	0	525	0	525	0	535	0	530	0	525	0	535	0	530	0	0	530	1.63663
14.4551	0	535	0	525	0	525	0	535	0	530	0	525	0	535	0	530	0	0	530	1.63663
14.4661	0	535	0	525	0	525	0	535	0	530	0	525	0	535	0	530	0	0	530	1.63663
14.4772	0	535	0	525	0	525	0	535	0	530	0	525	0	535	0	530	0	0	530	1.63663
14.4882	0	535	0	525	0	525	0	535	0	530	0	525	0	535	0	530	0	0	530	1.63663
14.4993	0	535	0	525	0	525	0	535	0	530	0	525	0	535	0	530	0	0	530	1.63663
14.5103	0	535	0	525	0	525	0	535	0	530	0	525	0	535	0	530	0	0	530	1.63663
14.5214	0	535	0	525	0	525	0	535	0	530	0	525	0	535	0	530	0	0	530	1.63663
14.5324	0	535	0	525	0	525	0	535	0	530	0	525	0	535	0	530	0	0	530	1.63663
14.5434	0	535	0	525	0	525	0	535	0	530	0	525	0	535	0	530	0	0	530	1.63663
14.5545	0	535	0	525	0	525	0	535	0	530	0	525	0	535	0	530	0	0	530	1.63663
14.5655	0	535	0	525	0	525	0	535	0	530	0	525	0	535	0	530	0	0	530	1.63663
14.5766	0	535	0	525	0	525	0	535	0	530	0	525	0	535	0	530	0	0	530	1.63663
14.5876	0	535	0	525	0	525	0	535	0	530	0	525	0	535	0	530	0	0	530	1.63663
14.5987	0	535	0	525	0	525	0	535	0	530	0	525	0	535	0	530	0	0	530	1.63663
14.6097	0	535	0	525	0	525	0	535	0	530	0	525	0	535	0	530	0	0	530	1.63663
14.6207	0	535	0	525	0	525	0	535	0	530	0	525	0	535	0	530	0	0	530	1.63663
14.6318	0	535	0	525	0	525	0	535	0	530	0	525	0	535	0	530	0	0	530	1.63663
14.6428	0	535	0	525	0	525	0	535	0	530	0	525	0	535	0	530	0	0	530	1.63663
14.6539	0	535	0	525	0	525	0	535	0	530	0	525	0	535	0	530	0	0	530	1.63663
14.6649	0	535	0	525	0	525	0	535	0	530	0	525	0	535	0	530	0	0	530	1.63663
14.676	0	535	0	525	0	525	0	535	0	530	0	525	0	535	0	530	0	0	530	1.63663
14.687	0	535	0	525	0	525	0	535	0	530	0	525	0	535	0	530	0	0	530	1.63663
14.698	0	535	0	525	0	525	0	535	0	530	0	525	0	535	0	530	0	0	530	1.63663
14.7091	0	535	0	525	0	525	0	535	0	530	0	525	0	535	0	530	0	0	530	1.63663
14.7201	0	535	0	525	0	525	0	535	0	530	0	525	0	535	0	530	0	0	530	1.63663
14.7312	0	535	0	525	0	525	0	535	0	530	0	525	0	535	0	530	0	0	530	1.63663
14.7422	0	535	0	525	0	525	0	535	0	530	0	525	0	535	0	530	0	0	530	1.63663
14.7533	0	535	0	525	0	525	0	535	0	530	0	525	0	535	0	530	0	0	530	1.63663
14.7643	0	535	0	525	0	525	0	535	0	530	0	525	0	535	0	530	0	0	530	1.63663
14.7753	0	535	0	525	0	525	0	535	0	530	0	525	0	535	0	530	0	0	530	1.63663
14.7864	0	535	0	525	0	525	0	535	0	530	0	525	0	535	0	530	0	0	530	1.63663
14.7974	0	535	0	525	0	525	0	535	0	530	0	525	0	535	0	530	0	0	530	1.63663
14.8085	0	535	0	525	0	525	0	535	0	530	0	525	0	535	0	530	0	0	530	1.63663
14.8195	0	535	0	525	0	525	0	535	0	530	0	525	0	535	0	530	0	0	530	1.63663
14.8306	0	535	0	525	0	525	0	535	0	530	0	525	0	535	0	530	0	0	530	1.63663
14.8416	0	535	0	525	0	525	0	535	0	530	0	525	0	535	0	530	0	0	530	1.63663
14.8526	0	535	0	525	0	525	0	535	0	530	0	525	0	535	0	530	0	0	530	1.63663
14.8637	0	535	0	525	0	525	0	535	0	530	0	525	0	535	0	530	0	0	530	1.63663
14.8747	0	535	0	525	0	525	0	535	0	530	0	525	0	535	0	530	0	0	530	1.63663
14.8858	0	535	0	525	0	525	0	535	0	530	0	525	0	535	0	530	0	0	530	1.63663
14.8968	0	535	0	525	0	525	0	535	0	530	0	525	0	535	0	530	0	0	530	1.63663
14.9079	0	535	0	525	0	525	0	535	0	530	0	525	0	535	0	530	0	0	530	1.63663
14.9189	0	535	0	525	0	525	0	535	0	530	0	525	0	535	0	530	0	0	530	1.63663
14.9299	0	535	0	525	0	525	0	535	0	530	0	525	0	535	0	530	0	0	530	1.63663
14.941	0	535	0	525	0	525	0	535	0	530	0	525	0	535	0	530	0	0	530	1.63663
14.952	0	535	0	525	0	525	0	535	0	530	0	525	0	535	0	530	0	0	530	1.63663
14.9631	0	535	0	525	0	525	0	535	0	530	0	525	0	535	0	530	0	0	530	1.63663
14.9741	0	535	0	525	0	525	0	535	0	530	0	525	0	535	0	530	0	0	530	1.63663
14.9852	0	535	0	525	0	525	0	535	0	530	0	525	0	535	0	530	0	0	530	1.63663
14.9962	0	535	0	525	0	525	0	535	0	530	0	525	0	535	0	530	0	0	530	1.63663
15.0072	0	535	0	525	0	525	0	535	0	530	0	525	0	535	0	530	0	0	530	1.63663
15.0183	0	535	0	525	0	525	0	535	0	530	0	525	0	535	0	530	0	0	530	1.63663
15.0293	0	535	0	525	0	525	0	535	0	530	0	525	0	535	0	530	0	0	530	1.63663
15.0404	0	535	0	525	0	525	0	535	0	530	0	525	0	535	0	530	0	0	530	1.63663
15.0514	0	535	0	525	0	525	0	535	0	530	0	525	0	535	0	530	0	0	530	1.63663
15.0625	0	535	0	525	0	525	0	535	0	530	0	525	0	535	0	530	0	0	530	1.63663
15.0735	0	535	0	525	0	525	0	535	0	530	0	525	0	535	0	530	0	0	530	1.63663
15.0845	0	535	0	525	0	525	0	535	0	530	0	525	0	535	0	530	0	0	530	1.63663
15.0956	0	535	0	525	0	525	0	535	0	530	0	525	0	535	0	530	0	0	530	1.63663
15.1066	0	535	0	525	0	525	0	535	0	530	0	525	0	535	0	530	0	0	530	1.63663
15.1177	0	535	0	525	0	525	0	535	0	530	0	525	0	535	0	530	0	0	530	1.63663
15.1287	0	535	0	525	0	525	0	535	0	530	0	525	0	535	0	530	0	0	530	1.63663
15.1398	0	535	0	525	0	525	0	535	0	530	0	525	0	535	0	530	0	0	530	1.63663
15.1508	0	535	0	525	0	525	0	535	0	530	0	525	0	535	0	530	0	0	530	1.63663
15.1618	0	535	0	525	0	525	0	535	0	530	0	525	0	535	0	530	0	0	530	1.63663
15.1729	0	535	0	525	0	525	0	535	0	530	0	525	0	535	0	530	0	0	530	1.63663
15.1839	0	535	0	525	0	525	0	535	0	530	0	525	0	535	0	530	0	0	530	1.63663
15.195	0	535	0	525	0	525	0	535	0	530	0	525	0	535	0	530	0	0	530	1.63663
15.206	0	535	0	525	0	525	0	535	0	530	0	525	0	535	0	530	0	0	530	1.63663
15.2171	0	535	0	525	0	525	0	535	0	530	0	525	0	535	0	530	0	0	530	1.63663
15.2281	0	535	0	525	0	525	0	535	0	530	0	525	0	535	0	530	0	0	530	1.63663
15.2391	0	535	0	525	0	525	0	535	0	530	0	525	0	535	0	530	0	0	530	1.63663
15.2502	0	535	0	525	0	525	0	535	0	530	0	525	0	535	0	530	0	0	530	1.63663
15.2612	0	535	0	525	0	525	0	535	0	530	0	525	0	535	0	530	0	0	530	1.63663
15.2723	0	535	0	525	0	525	0	535	0	530	0	525	0	535	0	530	0	0	530	1.63663
15.2833	0	535	0	525	0	525	0	535	0	530	0	525	0	535	0	530	0	0	530	1.63663
15.2944	0	535	0	525	0	525	0	535	0	530	0	525	0	535	0	530	0	0	530	1.63663
15.3054	0	535	0	525	0	525	0	535	0	530	0	525	0	535	0	530	0	0	530	1.63663
15.3164	0	535	0	525	0	525	0	535	0	530	0	525	0	535	0	530	0	0	530	1.63663
15.3275	0	535	0	525	0	525	0	535	0	530	0	525	0	535	0	530	0	0	530	1.63663
15.3385	0	535	0	525	0	525	0	535	0	530	0	525	0	535	0	530	0	0	530	1.63663
15.3496	0	535	0	525	0	525	0	535	0	530	0	525	0	535	0	530	0	0	530	1.63663
15.3606	0	535	0	525	0	525	0	535	0	530	0	525	0	535	0	530	0	0	530	1.63663
15.3717	0	535	0	525	0	525	0	535	0	530	0	525	0	535	0	530	0	0	530	1.63663
15.3827	0	535	0	525	0	525	0	535	0	530	0	525	0	535	0	530	0	0	530	1.63663
15.3937	0	535	0	525	0	525	0	535	0	530	0	525	0	535	0	530	0	0	530	1.63663
15.4048	0	535	0	525	0	525	0	535	0	530	0	525	0	535	0	530	0	0	530	1.63663
15.4158	0	535	0	525	0	525	0	535	0	530	0	525	0	535	0	530	0	0	530	1.63663
15.4269	0	535	0	525	0	525	0	535	0	530	0	525	0	535	0	530	0	0	530	1.63663
15.4379	0	535	0	525	0	525	0	535	0	530	0	525	0	535	0	530	0	0	530	1.63663
15.449	0	535	0	525	0	525	0	535	0	530	0	525	0	535	0	530	0	0	530	1.63663
15.46	0	535	0	525	0	525	0	535	0	530	0	525	0	535	0	530	0	0	530	1.63663
15.471	0	535	0	525	0	525	0	535	0	530	0	525	0	535	0	530	0	0	530	1.63663
15.4821	0	535	0	525	0	525	0	535	0	530	0	525	0	535	0	530	0	0	530	1.63663
15.4931	0	535	0	525	0	525	0	535	0	530	0	525	0	535	0	530	0	0	530	1.63663
15.5042	0	535	0	525	0	525	0	535	0	530	0	525	0	535	0	530	0	0	530	1.63663
15.5152	0	535	0	525	0	525	0	535	0	530	0	525	0	535	0	530	0	0	530	1.63663
15.5263	0	535	0	525	0	525	0	535	0	530	0	525	0	535	0	530	0	0	530	1.63663
15.5373	0	535	0	525	0	525	0	535	0	530	0	525	0	535	0	530	0	0	530	1.63663
15.5483	0	535	0	525	0	525	0	535	0	530	0	525	0	535	0	530	0	0	530	1.63663
15.5594	0	535	0	525	0	525	0	535	0	530	0	525	0	535	0	530	0	0	530	1.63663
15.5704	0	535	0	525	0	525	0	535	0	530	0	525	0	535	0	530	0	0	530	1.63663
15.5815	0	535	0	525	0	525	0	535	0	530	0	525	0	535	0	530	0	0	530	1.63663
15.5925	0	535	0	525	0	525	0	535	0	530	0	525	0	535	0	530	0	0	530	1.63663
15.6036	0	535	0	525	0	525	0	535	0	530	0	525	0	535	0	530	0	0	530	1.63663
15.6146	0	535	0	525	0	525	0	535	0	530	0	525	0	535	0	530	0	0	530	1.63663
15.6256	0	535	0	525	0	525	0	535	0	530	0	525	0	535	0	530	0	0	530	1.63663
15.6367	0	535	0	525	0	525	0	535	0	530	0	525	0	535	0	530	0	0	530	1.63663
15.6477	0	535	0	525	0	525	0	535	0	530	0	525	0	535	0	530	0	0	530	1.63663
15.6588	0	535	0	525	0	525	0	535	0	530	0	525	0	535	0	530	0	0	530	1.63663
15.6698	0	535	0	525	0	525	0	535	0	530	0	525	0	535	0	530	0	0	530	1.63663
15.6809	0	535	0	525	0	525	0	535	0	530	0	525	0	535	0	530	0	0	530	1.63663
15.6919	0	535	0	525	0	525	0	535	0	530	0	525	0	535	0	530	0	0	530	1.63663
15.7029	0	535	0	525	0	525	0	535	0	530	0	525	0	535	0	530	0	0	530	1.63663
15.714	0	535	0	525	0	525	0	535	0	530	0	525	0	535	0	530	0	0	530	1.63663
15.725	0	535	0	525	0	525	0	535	0	530	0	525	0	535	0	530	0	0	530	1.63663
15.7361	0	535	0	525	0	525	0	535	0	530	0	525	0	535	0	530	0	0	530	1.63663
15.7471	0	535	0	525	0	525	0	535	0	530	0	525	0	535	0	530	0	0	530	1.63663
15.7582	0	535	0	525	0	525	0	535	0	530	0	525	0	535	0	530	0	0	530	1.63663
15.7692	0	535	0	525	0	525	0	535	0	530	0	525	0	535	0	530	0	0	530	1.63663
15.7802	0	535	0	525	0	525	0	535	0	530	0	525	0	535	0	530	0	0	530	1.63663
15.7913	0	535	0	525	0	525	0	535	0	530	0	525	0	535	0	530	0	0	530	1.63663
15.8023	0	535	0	525	0	525	0	535	0	530	0	525	0	535	0	530	0	0	530	1.63663
15.8134	0	535	0	525	0	525	0	535	0	530	0	525	0	535	0	530	0	0	530	1.63663
15.8244	0	535	0	525	0	525	0	535	0	530	0	525	0	535	0	530	0	0	530	1.63663
15.8355	0	535	0	525	0	525	0	535	0	530	0	525	0	535	0	530	0	0	530	1.63663
15.8465	0	535	0	525	0	525	0	535	0	530	0	525	0	535	0	530	0	0	530	1.63663
15.8575	0	535	0	525	0	525	0	535	0	530	0	525	0	535	0	530	0	0	530	1.63663
15.8686	0	535	0	525	0	525	0	535	0	530	0	525	0	535	0	530	0	0	530	1.63663
15.8796	0	535	0	525	0	525	0	535	0	530	0	525	0	535	0	530	0	0	530	1.63663
15.8907	0	535	0	525	0	525	0	535	0	530	0	525	0	535	0	530	0	0	530	1.63663
15.9017	0	535	0	525	0	525	0	535	0	530	0	525	0	535	0	530	0	0	530	1.63663
15.9128	0	535	0	525	0	525	0	535	0	530	0	525	0	535	0	530	0	0	530	1.63663
15.9238	0	535	0	525	0	525	0	535	0	530	0	525	0	535	0	530	0	0	530	1.63663
15.9348	0	535	0	525	0	525	0	535	0	530	0	525	0	535	0	530	0	0	530	1.63663
15.9459	0	535	0	525	0	525	0	535	0	530	0	525	0	535	0	530	0	0	530	1.63663
15.9569	0	535	0	525	0	525	0	535	0	530	0	525	0	535	0	530	0	0	530	1.63663
15.968	0	535	0	525	0	525	0	535	0	530	0	525	0	535	0	530	0	0	530	1.63663
15.979	0	535	0	525	0	525	0	535	0	530	0	525	0	535	0	530	0	0	530	1.63663
15.9901	0	535	0	525	0	525	0	535	0	530	0	525	0	535	0	530	0	0	530	1.63663
16.0011	0	535	0	525	0	525	0	535	0	530	0	525	0	535	0	530	0	0	530	1.63663
16.0121	0	535	0	525	0	525	0	535	0	530	0	525	0	535	0	530	0	0	530	1.63663
16.0232	0	535	0	525	0	525	0	535	0	530	0	525	0	535	0	530	0	0	530	1.63663
16.0342	0	535	0	525	0	525	0	535	0	530	0	525	0	535	0	530	0	0	530	1.63663
16.0453	0	535	0	525	0	525	0	535	0	530	0	525	0	535	0	530	0	0	530	1.63663
16.0563	0	535	0	525	0	525	0	535	0	530	0	525	0	535	0	530	0	0	530	1.63663
16.0674	0	535	0	525	0	525	0	535	0	530	0	525	0	535	0	530	0	0	530	1.63663
16.0784	0	535	0	525	0	525	0	535	0	530	0	525	0	535	0	530	0	0	530	1.63663
16.0894	0	535	0	525	0	525	0	535	0	530	0	525	0	535	0	530	0	0	530	1.63663
16.1005	0	535	0	525	0	525	0	535	0	530	0	525	0	535	0	530	0	0	530	1.63663
16.1115	0	535	0	525	0	525	0	535	0	530	0	525	0	535	0	530	0	0	530	1.63663
16.1226	0	535	0	525	0	525	0	535	0	530	0	525	0	535	0	530	0	0	530	1.63663
16.1336	0	535	0	525	0	525	0	535	0	530	0	525	0	535	0	530	0	0	530	1.63663
16.1447	0	535	0	525	0	525	0	535	0	530	0	525	0	535	0	530	0	0	530	1.63663
16.1557	0	535	0	525	0	525	0	535	0	530	0	525	0	535	0	530	0	0	530	1.63663
16.1667	0	535	0	525	0	525	0	535	0	530	0	525	0	535	0	530	0	0	530	1.63663
16.1778	0	535	0	525	0	525	0	535	0	530	0	525	0	535	0	530	0	0	530	1.63663
16.1888	0	535	0	525	0	525	0	535	0	530	0	525	0	535	0	530	0	0	530	1.63663
16.1999	0	535	0	525	0	525	0	535	0	530	0	525	0	535	0	530	0	0	530	1.63663
16.2109	0	535	0	525	0	525	0	535	0	530	0	525	0	535	0	530	0	0	530	1.63663
16.222	0	535	0	525	0	525	0	535	0	530	0	525	0	535	0	530	0	0	530	1.63663
16.233	0	535	0	525	0	525	0	535	0	530	0	525	0	535	0	530	0	0	530	1.63663
16.244	0	535	0	525	0	525	0	535	0	530	0	525	0	535	0	530	0	0	530	1.63663
16.2551	0	535	0	525	0	525	0	535	0	530	0	525	0	535	0	530	0	0	530	1.63663
16.2661	0	535	0	525	0	525	0	535	0	530	0	525	0	535	0	530	0	0	530	1.63663
16.2772	0	535	0	525	0	525	0	535	0	530	0	525	0	535	0	530	0	0	530	1.63663
16.2882	0	535	0	525	0	525	0	535	0	530	0	525	0	535	0	530	0	0	530	1.63663
16.2993	0	535	0	525	0	525	0	535	0	530	0	525	0	535	0	530	0	0	530	1.63663
16.3103	0	535	0	525	0	525	0	535	0	530	0	525	0	535	0	530	0	0	530	1.63663
16.3213	0	535	0	525	0	525	0	535	0	530	0	525	0	535	0	530	0	0	530	1.63663
16.3324	0	535	0	525	0	525	0	535	0	530	0	525	0	535	0	530	0	0	530	1.63663
16.3434	0	535	0	525	0	525	0	535	0	530	0	525	0	535	0	530	0	0	530	1.63663
16.3545	0	535	0	525	0	525	0	535	0	530	0	525	0	535	0	530	0	0	530	1.63663
16.3655	0	535	0	525	0	525	0	535	0	530	0	525	0	535	0	530	0	0	530	1.63663
16.3766	0	535	0	525	0	525	0	535	0	530	0	525	0	535	0	530	0	0	530	1.63663
16.3876	0	535	0	525	0	525	0	535	0	530	0	525	0	535	0	530	0	0	530	1.63663
16.3986	0	535	0	525	0	525	0	535	0	530	0	525	0	535	0	530	0	0	530	1.63663
16.4097	0	535	0	525	0	525	0	535	0	530	0	525	0	535	0	530	0	0	530	1.63663
16.4207	0	535	0	525	0	525	0	535	0	530	0	525	0	535	0	530	0	0	530	1.63663
16.4318	0	535	0	525	0	525	0	535	0	530	0	525	0	535	0	530	0	0	530	1.63663
16.4428	0	535	0	525	0	525	0	535	0	530	0	525	0	535	0	530	0	0	530	1.63663
16.4539	0	535	0	525	0	525	0	535	0	530	0	525	0	535	0	530	0	0	530	1.63663
16.4649	0	535	0	525	0	525	0	535	0	530	0	525	0	535	0	530	0	0	530	1.63663
16.4759	0	535	0	525	0	525	0	535	0	530	0	525	0	535	0	530	0	0	530	1.63663
16.487	0	535	0	525	0	525	0	535	0	530	0	525	0	535	0	530	0	0	530	1.63663
16.498	0	535	0	525	0	525	0	535	0	530	0	525	0	535	0	530	0	0	530	1.63663
16.5091	0	535	0	525	0	525	0	535	0	530	0	525	0	535	0	530	0	0	530	1.63663
16.5201	0	535	0	525	0	525	0	535	0	530	0	525	0	535	0	530	0	0	530	1.63663
16.5312	0	535	0	525	0	525	0	535	0	530	0	525	0	535	0	530	0	0	530	1.63663
16.5422	0	535	0	525	0	525	0	535	0	530	0	525	0	535	0	530	0	0	530	1.63663
16.5532	0	535	0	525	0	525	0	535	0	530	0	525	0	535	0	530	0	0	530	1.63663
16.5643	0	535	0	525	0	525	0	535	0	530	0	525	0	535	0	530	0	0	530	1.63663
16.5753	0	535	0	525	0	525	0	535	0	530	0	525	0	535	0	530	0	0	530	1.63663
16.5864	0	535	0	525	0	525	0	535	0	530	0	525	0	535	0	530	0	0	530	1.63663
16.5974	0	535	0	525	0	525	0	535	0	530	0	525	0	535	0	530	0	0	530	1.63663
16.6085	0	535	0	525	0	525	0	535	0	530	0	525	0	535	0	530	0	0	530	1.63663
16.6195	0	535	0	525	0	525	0	535	0	530	0	525	0	535	0	530	0	0	530	1.63663
16.6305	0	535	0	525	0	525	0	535	0	530	0	525	0	535	0	530	0	0	530	1.63663
16.6416	0	535	0	525	0	525	0	535	0	530	0	525	0	535	0	530	0	0	530	1.63663
16.6526	0	535	0	525	0	525	0	535	0	530	0	525	0	535	0	530	0	0	530	1.63663
16.6637	0	535	0	525	0	525	0	535	0	530	0	525	0	535	0	530	0	0	530	1.63663
16.6747	0	535	0	525	0	525	0	535	0	530	0	525	0	535	0	530	0	0	530	1.63663
16.6858	0	535	0	525	0	525	0	535	0	530	0	525	0	535	0	530	0	0	530	1.63663
16.6968	0	535	0	525	0	525	0	535	0	530	0	525	0	535	0	530	0	0	530	1.63663
16.7078	0	535	0	525	0	525	0	535	0	530	0	525	0	535	0	530	0	0	530	1.63663
16.7189	0	535	0	525	0	525	0	535	0	530	0	525	0	535	0	530	0	0	530	1.63663
16.7299	0	535	0	525	0	525	0	535	0	530	0	525	0	535	0	530	0	0	530	1.63663
16.741	0	535	0	525	0	525	0	535	0	530	0	525	0	535	0	530	0	0	530	1.63663
16.752	0	535	0	525	0	525	0	535	0	530	0	525	0	535	0	530	0	0	530	1.63663
16.7631	0	535	0	525	0	525	0	535	0	530	0	525	0	535	0	530	0	0	530	1.63663
16.7741	0	535	0	525	0	525	0	535	0	530	0	525	0	535	0	530	0	0	530	1.63663
16.7851	0	535	0	525	0	525	0	535	0	530	0	525	0	535	0	530	0	0	530	1.63663
16.7962	0	535	0	525	0	525	0	535	0	530	0	525	0	535	0	530	0	0	530	1.63663
16.8072	0	535	0	525	0	525	0	535	0	530	0	525	0	535	0	530	0	0	530	1.63663
16.8183	0	535	0	525	0	525	0	535	0	530	0	525	0	535	0	530	0	0	530	1.63663
16.8293	0	535	0	525	0	525	0	535	0	530	0	525	0	535	0	530	0	0	530	1.63663
16.8404	0	535	0	525	0	525	0	535	0	530	0	525	0	535	0	530	0	0	530	1.63663
16.8514	0	535	0	525	0	525	0	535	0	530	0	525	0	535	0	530	0	0	530	1.63663
16.8624	0	535	0	525	0	525	0	535	0	530	0	525	0	535	0	530	0	0	530	1.63663
16.8735	0	535	0	525	0	525	0	535	0	530	0	525	0	535	0	530	0	0	530	1.63663
16.8845	0	535	0	525	0	525	0	535	0	530	0	525	0	535	0	530	0	0	530	1.63663
16.8956	0	535	0	525	0	525	0	535	0	530	0	525	0	535	0	530	0	0	530	1.63663
16.9066	0	535	0	525	0	525	0	535	0	530	0	525	0	535	0	530	0	0	530	1.63663
16.9177	0	535	0	525	0	525	0	535	0	530	0	525	0	535	0	530	0	0	530	1.63663
16.9287	0	535	0	525	0	525	0	535	0	530	0	525	0	535	0	530	0	0	530	1.63663
16.9397	0	535	0	525	0	525	0	535	0	530	0	525	0	535	0	530	0	0	530	1.63663
16.9508	0	535	0	525	0	525	0	535	0	530	0	525	0	535	0	530	0	0	530	1.63663
16.9618	0	535	0	525	0	525	0	535	0	530	0	525	0	535	0	530	0	0	530	1.63663
16.9729	0	535	0	525	0	525	0	535	0	530	0	525	0	535	0	530	0	0	530	1.63663
16.9839	0	535	0	525	0	525	0	535	0	530	0	525	0	535	0	530	0	0	530	1.63663
16.995	0	535	0	525	0	525	0	535	0	530	0	525	0	535	0	530	0	0	530	1.63663
17.006	0	535	0	525	0	525	0	535	0	530	0	525	0	535	0	530	0	0	530	1.63663
17.017	0	535	0	525	0	525	0	535	0	530	0	525	0	535	0	530	0	0	530	1.63663
17.0281	0	535	0	525	0	525	0	535	0	530	0	525	0	535	0	530	0	0	530	1.63663
17.0391	0	535	0	525	0	525	0	535	0	530	0	525	0	535	0	530	0	0	530	1.63663
17.0502	0	535	0	525	0	525	0	535	0	530	0	525	0	535	0	530	0	0	530	1.63663
17.0612	0	535	0	525	0	525	0	535	0	530	0	525	0	535	0	530	0	0	530	1.63663
17.0723	0	535	0	525	0	525	0	535	0	530	0	525	0	535	0	530	0	0	530	1.63663
17.0833	0	535	0	525	0	525	0	535	0	530	0	525	0	535	0	530	0	0	530	1.63663
17.0943	0	535	0	525	0	525	0	535	0	530	0	525	0	535	0	530	0	0	530	1.63663
17.1054	0	535	0	525	0	525	0	535	0	530	0	525	0	535	0	530	0	0	530	1.63663
17.1164	0	535	0	525	0	525	0	535	0	530	0	525	0	535	0	530	0	0	530	1.63663
17.1275	0	535	0	525	0	525	0	535	0	530	0	525	0	535	0	530	0	0	530	1.63663
17.1385	0	535	0	525	0	525	0	535	0	530	0	525	0	535	0	530	0	0	530	1.63663
17.1496	0	535	0	525	0	525	0	535	0	530	0	525	0	535	0	530	0	0	530	1.63663
17.1606	0	535	0	525	0	525	0	535	0	530	0	525	0	535	0	530	0	0	530	1.63663
17.1716	0	535	0	525	0	525	0	535	0	530	0	525	0	535	0	530	0	0	530	1.63663
17.1827	0	535	0	525	0	525	0	535	0	530	0	525	0	535	0	530	0	0	530	1.63663
17.1937	0	535	0	525	0	525	0	535	0	530	0	525	0	535	0	530	0	0	530	1.63663
17.2048	0	535	0	525	0	525	0	535	0	530	0	525	0	535	0	530	0	0	530	1.63663
17.2158	0	535	0	525	0	525	0	535	0	530	0	525	0	535	0	530	0	0	530	1.63663
17.2269	0	535	0	525	0	525	0	535	0	530	0	525	0	535	0	530	0	0	530	1.63663
17.2379	0	535	0	525	0	525	0	535	0	530	0	525	0	535	0	530	0	0	530	1.63663
17.2489	0	535	0	525	0	525	0	535	0	530	0	525	0	535	0	530	0	0	530	1.63663
17.26	0	535	0	525	0	525	0	535	0	530	0	525	0	535	0	530	0	0	530	1.63663
17.271	0	535	0	525	0	525	0	535	0	530	0	525	0	535	0	530	0	0	530	1.63663
17.2821	0	535	0	525	0	525	0	535	0	530	0	525	0	535	0	530	0	0	530	1.63663
17.2931	0	535	0	525	0	525	0	535	0	530	0	525	0	535	0	530	0	0	530	1.63663
17.3042	0	535	0	525	0	525	0	535	0	530	0	525	0	535	0	530	0	0	530	1.63663
17.3152	0	535	0	525	0	525	0	535	0	530	0	525	0	535	0	530	0	0	530	1.63663
17.3262	0	535	0	525	0	525	0	535	0	530	0	525	0	535	0	530	0	0	530	1.63663
17.3373	0	535	0	525	0	525	0	535	0	530	0	525	0	535	0	530	0	0	530	1.63663
17.3483	0	535	0	525	0	525	0	535	0	530	0	525	0	535	0	530	0	0	530	1.63663
17.3594	0	535	0	525	0	525	0	535	0	530	0	525	0	535	0	530	0	0	530	1.63663
17.3704	0	535	0	525	0	525	0	535	0	530	0	525	0	535	0	530	0	0	530	1.63663
17.3815	0	535	0	525	0	525	0	535	0	530	0	525	0	535	0	530	0	0	530	1.63663
17.3925	0	535	0	525	0	525	0	535	0	530	0	525	0	535	0	530	0	0	530	1.63663
17.4035	0	535	0	525	0	525	0	535	0	530	0	525	0	535	0	530	0	0	530	1.63663
17.4146	0	535	0	525	0	525	0	535	0	530	0	525	0	535	0	530	0	0	530	1.63663
17.4256	0	535	0	525	0	525	0	535	0	530	0	525	0	535	0	530	0	0	530	1.63663
17.4367	0	535	0	525	0	525	0	535	0	530	0	525	0	535	0	530	0	0	530	1.63663
17.4477	0	535	0	525	0	525	0	535	0	530	0	525	0	535	0	530	0	0	530	1.63663
17.4588	0	535	0	525	0	525	0	535	0	530	0	525	0	535	0	530	0	0	530	1.63663
17.4698	0	535	0	525	0	525	0	535	0	530	0	525	0	535	0	530	0	0	530	1.63663
17.4808	0	535	0	525	0	525	0	535	0	530	0	525	0	535	0	530	0	0	530	1.63663
17.4919	0	535	0	525	0	525	0	535	0	530	0	525	0	535	0	530	0	0	530	1.63663
17.5029	0	535	0	525	0	525	0	535	0	530	0	525	0	535	0	530	0	0	530	1.63663
17.514	0	535	0	525	0	525	0	535	0	530	0	525	0	535	0	530	0	0	530	1.63663
17.525	0	535	0	525	0	525	0	535	0	530	0	525	0	535	0	530	0	0	530	1.63663
17.5361	0	535	0	525	0	525	0	535	0	530	0	525	0	535	0	530	0	0	530	1.63663
17.5471	0	535	0	525	0	525	0	535	0	530	0	525	0	535	0	530	0	0	530	1.63663
17.5581	0	535	0	525	0	525	0	535	0	530	0	525	0	535	0	530	0	0	530	1.63663
17.5692	0	535	0	525	0	525	0	535	0	530	0	525	0	535	0	530	0	0	530	1.63663
17.5802	0	535	0	525	0	525	0	535	0	530	0	525	0	535	0	530	0	0	530	1.63663
17.5913	0	535	0	525	0	525	0	535	0	530	0	525	0	535	0	530	0	0	530	1.63663
17.6023	0	535	0	525	0	525	0	535	0	530	0	525	0	535	0	530	0	0	530	1.63663
17.6134	0	535	0	525	0	525	0	535	0	530	0	525	0	535	0	530	0	0	530	1.63663
17.6244	0	535	0	525	0	525	0	535	0	530	0	525	0	535	0	530	0	0	530	1.63663
17.6354	0	535	0	525	0	525	0	535	0	530	0	525	0	535	0	530	0	0	530	1.63663
17.6465	0	535	0	525	0	525	0	535	0	530	0	525	0	535	0	530	0	0	530	1.63663
17.6575	0	535	0	525	0	525	0	535	0	530	0	525	0	535	0	530	0	0	530	1.63663
17.6686	0	535	0	525	0	525	0	535	0	530	0	525	0	535	0	530	0	0	530	1.63663
17.6796	0	535	0	525	0	525	0	535	0	530	0	525	0	535	0	530	0	0	530	1.63663
17.6907	0	535	0	525	0	525	0	535	0	530	0	525	0	535	0	530	0	0	530	1.63663
17.7017	0	535	0	525	0	525	0	535	0	530	0	525	0	535	0	530	0	0	530	1.63663
17.7127	0	535	0	525	0	525	0	535	0	530	0	525	0	535	0	530	0	0	530	1.63663
17.7238	0	535	0	525	0	525	0	535	0	530	0	525	0	535	0	530	0	0	530	1.63663
17.7348	0	535	0	525	0	525	0	535	0	530	0	525	0	535	0	530	0	0	530	1.63663
17.7459	0	535	0	525	0	525	0	535	0	530	0	525	0	535	0	530	0	0	530	1.63663
17.7569	0	535	0	525	0	525	0	535	0	530	0	525	0	535	0	530	0	0	530	1.63663
17.768	0	535	0	525	0	525	0	535	0	530	0	525	0	535	0	530	0	0	530	1.63663
17.779	0	535	0	525	0	525	0	535	0	530	0	525	0	535	0	530	0	0	530	1.63663
17.79	0	535	0	525	0	525	0	535	0	530	0	525	0	535	0	530	0	0	530	1.63663
17.8011	0	535	0	525	0	525	0	535	0	530	0	525	0	535	0	530	0	0	530	1.63663
17.8121	0	535	0	525	0	525	0	535	0	530	0	525	0	535	0	530	0	0	530	1.63663
17.8232	0	535	0	525	0	525	0	535	0	530	0	525	0	535	0	530	0	0	530	1.63663
17.8342	0	535	0	525	0	525	0	535	0	530	0	525	0	535	0	530	0	0	530	1.63663
17.8453	0	535	0	525	0	525	0	535	0	530	0	525	0	535	0	530	0	0	530	1.63663
17.8563	0	535	0	525	0	525	0	535	0	530	0	525	0	535	0	530	0	0	530	1.63663
17.8673	0	535	0	525	0	525	0	535	0	530	0	525	0	535	0	530	0	0	530	1.63663
17.8784	0	535	0	525	0	525	0	535	0	530	0	525	0	535	0	530	0	0	530	1.63663
17.8894	0	535	0	525	0	525	0	535	0	530	0	525	0	535	0	530	0	0	530	1.63663
17.9005	0	535	0	525	0	525	0	535	0	530	0	525	0	535	0	530	0	0	530	1.63663
17.9115	0	535	0	525	0	525	0	535	0	530	0	525	0	535	0	530	0	0	530	1.63663
17.9226	0	535	0	525	0	525	0	535	0	530	0	525	0	535	0	530	0	0	530	1.63663
17.9336	0	535	0	525	0	525	0	535	0	530	0	525	0	535	0	530	0	0	530	1.63663
17.9446	0	535	0	525	0	525	0	535	0	530	0	525	0	535	0	530	0	0	530	1.63663
17.9557	0	535	0	525	0	525	0	535	0	530	0	525	0	535	0	530	0	0	530	1.63663
17.9667	0	535	0	525	0	525	0	535	0	530	0	525	0	535	0	530	0	0	530	1.63663
17.9778	0	535	0	525	0	525	0	535	0	530	0	525	0	535	0	530	0	0	530	1.63663
17.9888	0	535	0	525	0	525	0	535	0	530	0	525	0	535	0	530	0	0	530	1.63663
17.9999	0	535	0	525	0	525	0	535	0	530	0	525	0	535	0	530	0	0	530	1.63663
18.0109	0	535	0	525	0	525	0	535	0	530	0	525	0	535	0	530	0	0	530	1.63663
18.0219	0	535	0	525	0	525	0	535	0	530	0	525	0	535	0	530	0	0	530	1.63663
18.033	0	535	0	525	0	525	0	535	0	530	0	525	0	535	0	530	0	0	530	1.63663
18.044	0	535	0	525	0	525	0	535	0	530	0	525	0	535	0	530	0	0	530	1.63663
18.0551	0	535	0	525	0	525	0	535	0	530	0	525	0	535	0	530	0	0	530	1.63663
18.0661	0	535	0	525	0	525	0	535	0	530	0	525	0	535	0	530	0	0	530	1.63663
18.0772	0	535	0	525	0	525	0	535	0	530	0	525	0	535	0	530	0	0	530	1.63663
18.0882	0	535	0	525	0	525	0	535	0	530	0	525	0	535	0	530	0	0	530	1.63663
18.0992	0	535	0	525	0	525	0	535	0	530	0	525	0	535	0	530	0	0	530	1.63663
18.1103	0	535	0	525	0	525	0	535	0	530	0	525	0	535	0	530	0	0	530	1.63663
18.1213	0	535	0	525	0	525	0	535	0	530	0	525	0	535	0	530	0	0	530	1.63663
18.1324	0	535	0	525	0	525	0	535	0	530	0	525	0	535	0	530	0	0	530	1.63663
18.1434	0	535	0	525	0	525	0	535	0	530	0	525	0	535	0	530	0	0	530	1.63663
18.1545	0	535	0	525	0	525	0	535	0	530	0	525	0	535	0	530	0	0	530	1.63663
18.1655	0	535	0	525	0	525	0	535	0	530	0	525	0	535	0	530	0	0	530	1.63663
18.1765	0	535	0	525	0	525	0	535	0	530	0	525	0	535	0	530	0	0	530	1.63663
18.1876	0	535	0	525	0	525	0	535	0	530	0	525	0	535	0	530	0	0	530	1.63663
18.1986	0	535	0	525	0	525	0	535	0	530	0	525	0	535	0	530	0	0	530	1.63663
18.2097	0	535	0	525	0	525	0	535	0	530	0	525	0	535	0	530	0	0	530	1.63663
18.2207	0	535	0	525	0	525	0	535	0	530	0	525	0	535	0	530	0	0	530	1.63663
18.2318	0	535	0	525	0	525	0	535	0	530	0	525	0	535	0	530	0	0	530	1.63663
18.2428	0	535	0	525	0	525	0	535	0	530	0	525	0	535	0	530	0	0	530	1.63663
18.2538	0	535	0	525	0	525	0	535	0	530	0	525	0	535	0	530	0	0	530	1.63663
18.2649	0	535	0	525	0	525	0	535	0	530	0	525	0	535	0	530	0	0	530	1.63663
18.2759	0	535	0	525	0	525	0	535	0	530	0	525	0	535	0	530	0	0	530	1.63663
18.287	0	535	0	525	0	525	0	535	0	530	0	525	0	535	0	530	0	0	530	1.63663
18.298	0	535	0	525	0	525	0	535	0	530	0	525	0	535	0	530	0	0	530	1.63663
18.3091	0	535	0	525	0	525	0	535	0	530	0	525	0	535	0	530	0	0	530	1.63663
18.3201	0	535	0	525	0	525	0	535	0	530	0	525	0	535	0	530	0	0	530	1.63663
18.3311	0	535	0	525	0	525	0	535	0	530	0	525	0	535	0	530	0	0	530	1.63663
18.3422	0	535	0	525	0	525	0	535	0	530	0	525	0	535	0	530	0	0	530	1.63663
18.3532	0	535	0	525	0	525	0	535	0	530	0	525	0	535	0	530	0	0	530	1.63663
18.3643	0	535	0	525	0	525	0	535	0	530	0	525	0	535	0	530	0	0	530	1.63663
18.3753	0	535	0	525	0	525	0	535	0	530	0	525	0	535	0	530	0	0	530	1.63663
18.3864	0	535	0	525	0	525	0	535	0	530	0	525	0	535	0	530	0	0	530	1.63663
18.3974	0	535	0	525	0	525	0	535	0	530	0	525	0	535	0	530	0	0	530	1.63663
18.4084	0	535	0	525	0	525	0	535	0	530	0	525	0	535	0	530	0	0	530	1.63663
18.4195	0	535	0	525	0	525	0	535	0	530	0	525	0	535	0	530	0	0	530	1.63663
18.4305	0	535	0	525	0	525	0	535	0	530	0	525	0	535	0	530	0	0	530	1.63663
18.4416	0	535	0	525	0	525	0	535	0	530	0	525	0	535	0	530	0	0	530	1.63663
18.4526	0	535	0	525	0	525	0	535	0	530	0	525	0	535	0	530	0	0	530	1.63663
18.4637	0	535	0	525	0	525	0	535	0	530	0	525	0	535	0	530	0	0	530	1.63663
18.4747	0	535	0	525	0	525	0	535	0	530	0	525	0	535	0	530	0	0	530	1.63663
18.4857	0	535	0	525	0	525	0	535	0	530	0	525	0	535	0	530	0	0	530	1.63663
18.4968	0	535	0	525	0	525	0	535	0	530	0	525	0	535	0	530	0	0	530	1.63663
18.5078	0	535	0	525	0	525	0	535	0	530	0	525	0	535	0	530	0	0	530	1.63663
18.5189	0	535	0	525	0	525	0	535	0	530	0	525	0	535	0	530	0	0	530	1.63663
18.5299	0	535	0	525	0	525	0	535	0	530	0	525	0	535	0	530	0	0	530	1.63663
18.541	0	535	0	525	0	525	0	535	0	530	0	525	0	535	0	530	0	0	530	1.63663
18.552	0	535	0	525	0	525	0	535	0	530	0	525	0	535	0	530	0	0	530	1.63663
18.563	0	535	0	525	0	525	0	535	0	530	0	525	0	535	0	530	0	0	530	1.63663
18.5741	0	535	0	525	0	525	0	535	0	530	0	525	0	535	0	530	0	0	530	1.63663
18.5851	0	535	0	525	0	525	0	535	0	530	0	525	0	535	0	530	0	0	530	1.63663
18.5962	0	535	0	525	0	525	0	535	0	530	0	525	0	535	0	530	0	0	530	1.63663
18.6072	0	535	0	525	0	525	0	535	0	530	0	525	0	535	0	530	0	0	530	1.63663
18.6183	0	535	0	525	0	525	0	535	0	530	0	525	0	535	0	530	0	0	530	1.63663
18.6293	0	535	0	525	0	525	0	535	0	530	0	525	0	535	0	530	0	0	530	1.63663
18.6403	0	535	0	525	0	525	0	535	0	530	0	525	0	535	0	530	0	0	530	1.63663
18.6514	0	535	0	525	0	525	0	535	0	530	0	525	0	535	0	530	0	0	530	1.63663
18.6624	0	535	0	525	0	525	0	535	0	530	0	525	0	535	0	530	0	0	530	1.63663
18.6735	0	535	0	525	0	525	0	535	0	530	0	525	0	535	0	530	0	0	530	1.63663
18.6845	0	535	0	525	0	525	0	535	0	530	0	525	0	535	0	530	0	0	530	1.63663
18.6956	0	535	0	525	0	525	0	535	0	530	0	525	0	535	0	530	0	0	530	1.63663
18.7066	0	535	0	525	0	525	0	535	0	530	0	525	0	535	0	530	0	0	530	1.63663
18.7176	0	535	0	525	0	525	0	535	0	530	0	525	0	535	0	530	0	0	530	1.63663
18.7287	0	535	0	525	0	525	0	535	0	530	0	525	0	535	0	530	0	0	530	1.63663
18.7397	0	535	0	525	0	525	0	535	0	530	0	525	0	535	0	530	0	0	530	1.63663
18.7508	0	535	0	525	0	525	0	535	0	530	0	525	0	535	0	530	0	0	530	1.63663
18.7618	0	535	0	525	0	525	0	535	0	530	0	525	0	535	0	530	0	0	530	1.63663
18.7729	0	535	0	525	0	525	0	535	0	530	0	525	0	535	0	530	0	0	530	1.63663
18.7839	0	535	0	525	0	525	0	535	0	530	0	525	0	535	0	530	0	0	530	1.63663
18.7949	0	535	0	525	0	525	0	535	0	530	0	525	0	535	0	530	0	0	530	1.63663
18.806	0	535	0	525	0	525	0	535	0	530	0	525	0	535	0	530	0	0	530	1.63663
18.817	0	535	0	525	0	525	0	535	0	530	0	525	0	535	0	530	0	0	530	1.63663
18.8281	0	535	0	525	0	525	0	535	0	530	0	525	0	535	0	530	0	0	530	1.63663
18.8391	0	535	0	525	0	525	0	535	0	530	0	525	0	535	0	530	0	0	530	1.63663
18.8502	0	535	0	525	0	525	0	535	0	530	0	525	0	535	0	530	0	0	530	1.63663
18.8612	0	535	0	525	0	525	0	535	0	530	0	525	0	535	0	530	0	0	530	1.63663
18.8722	0	535	0	525	0	525	0	535	0	530	0	525	0	535	0	530	0	0	530	1.63663
18.8833	0	535	0	525	0	525	0	535	0	530	0	525	0	535	0	530	0	0	530	1.63663
18.8943	0	535	0	525	0	525	0	535	0	530	0	525	0	535	0	530	0	0	530	1.63663
18.9054	0	535	0	525	0	525	0	535	0	530	0	525	0	535	0	530	0	0	530	1.63663
18.9164	0	535	0	525	0	525	0	535	0	530	0	525	0	535	0	530	0	0	530	1.63663
18.9275	0	535	0	525	0	525	0	535	0	530	0	525	0	535	0	530	0	0	530	1.63663
18.9385	0	535	0	525	0	525	0	535	0	530	0	525	0	535	0	530	0	0	530	1.63663
18.9495	0	535	0	525	0	525	0	535	0	530	0	525	0	535	0	530	0	0	530	1.63663
18.9606	0	535	0	525	0	525	0	535	0	530	0	525	0	535	0	530	0	0	530	1.63663
18.9716	0	535	0	525	0	525	0	535	0	530	0	525	0	535	0	530	0	0	530	1.63663
18.9827	0	535	0	525	0	525	0	535	0	530	0	525	0	535	0	530	0	0	530	1.63663
18.9937	0	535	0	525	0	525	0	535	0	530	0	525	0	535	0	530	0	0	530	1.63663
19.0048	0	535	0	525	0	525	0	535	0	530	0	525	0	535	0	530	0	0	530	1.63663
19.0158	0	535	0	525	0	525	0	535	0	530	0	525	0	535	0	530	0	0	530	1.63663
19.0268	0	535	0	525	0	525	0	535	0	530	0	525	0	535	0	530	0	0	530	1.63663
19.0379	0	535	0	525	0	525	0	535	0	530	0	525	0	535	0	530	0	0	530	1.63663
19.0489	0	535	0	525	0	525	0	535	0	530	0	525	0	535	0	530	0	0	530	1.63663
19.06	0	535	0	525	0	525	0	535	0	530	0	525	0	535	0	530	0	0	530	1.63663
19.071	0	535	0	525	0	525	0	535	0	530	0	525	0	535	0	530	0	0	530	1.63663
19.0821	0	535	0	525	0	525	0	535	0	530	0	525	0	535	0	530	0	0	530	1.63663
19.0931	0	535	0	525	0	525	0	535	0	530	0	525	0	535	0	530	0	0	530	1.63663
19.1041	0	535	0	525	0	525	0	535	0	530	0	525	0	535	0	530	0	0	530	1.63663
19.1152	0	535	0	525	0	525	0	535	0	530	0	525	0	535	0	530	0	0	530	1.63663
19.1262	0	535	0	525	0	525	0	535	0	530	0	525	0	535	0	530	0	0	530	1.63663
19.1373	0	535	0	525	0	525	0	535	0	530	0	525	0	535	0	530	0	0	530	1.63663
19.1483	0	535	0	525	0	525	0	535	0	530	0	525	0	535	0	530	0	0	530	1.63663
19.1594	0	535	0	525	0	525	0	535	0	530	0	525	0	535	0	530	0	0	530	1.63663
19.1704	0	535	0	525	0	525	0	535	0	530	0	525	0	535	0	530	0	0	530	1.63663
19.1814	0	535	0	525	0	525	0	535	0	530	0	525	0	535	0	530	0	0	530	1.63663
19.1925	0	535	0	525	0	525	0	535	0	530	0	525	0	535	0	530	0	0	530	1.63663
19.2035	0	535	0	525	0	525	0	535	0	530	0	525	0	535	0	530	0	0	530	1.63663
19.2146	0	535	0	525	0	525	0	535	0	530	0	525	0	535	0	530	0	0	530	1.63663
19.2256	0	535	0	525	0	525	0	535	0	530	0	525	0	535	0	530	0	0	530	1.63663
19.2367	0	535	0	525	0	525	0	535	0	530	0	525	0	535	0	530	0	0	530	1.63663
19.2477	0	535	0	525	0	525	0	535	0	530	0	525	0	535	0	530	0	0	530	1.63663
19.2587	0	535	0	525	0	525	0	535	0	530	0	525	0	535	0	530	0	0	530	1.63663
19.2698	0	535	0	525	0	525	0	535	0	530	0	525	0	535	0	530	0	0	530	1.63663
19.2808	0	535	0	525	0	525	0	535	0	530	0	525	0	535	0	530	0	0	530	1.63663
19.2919	0	535	0	525	0	525	0	535	0	530	0	525	0	535	0	530	0	0	530	1.63663
19.3029	0	535	0	525	0	525	0	535	0	530	0	525	0	535	0	530	0	0	530	1.63663
19.314	0	535	0	525	0	525	0	535	0	530	0	525	0	535	0	530	0	0	530	1.63663
19.325	0	535	0	525	0	525	0	535	0	530	0	525	0	535	0	530	0	0	530	1.63663
19.336	0	535	0	525	0	525	0	535	0	530	0	525	0	535	0	530	0	0	530	1.63663
19.3471	0	535	0	525	0	525	0	535	0	530	0	525	0	535	0	530	0	0	530	1.63663
19.3581	0	535	0	525	0	525	0	535	0	530	0	525	0	535	0	530	0	0	530	1.63663
19.3692	0	535	0	525	0	525	0	535	0	530	0	525	0	535	0	530	0	0	530	1.63663
19.3802	0	535	0	525	0	525	0	535	0	530	0	525	0	535	0	530	0	0	530	1.63663
19.3913	0	535	0	525	0	525	0	535	0	530	0	525	0	535	0	530	0	0	530	1.63663
19.4023	0	535	0	525	0	525	0	535	0	530	0	525	0	535	0	530	0	0	530	1.63663
19.4133	0	535	0	525	0	525	0	535	0	530	0	525	0	535	0	530	0	0	530	1.63663
19.4244	0	535	0	525	0	525	0	535	0	530	0	525	0	535	0	530	0	0	530	1.63663
19.4354	0	535	0	525	0	525	0	535	0	530	0	525	0	535	0	530	0	0	530	1.63663
19.4465	0	535	0	525	0	525	0	535	0	530	0	525	0	535	0	530	0	0	530	1.63663
19.4575	0	535	0	525	0	525	0	535	0	530	0	525	0	535	0	530	0	0	530	1.63663
19.4686	0	535	0	525	0	525	0	535	0	530	0	525	0	535	0	530	0	0	530	1.63663
19.4796	0	535	0	525	0	525	0	535	0	530	0	525	0	535	0	530	0	0	530	1.63663
19.4906	0	535	0	525	0	525	0	535	0	530	0	525	0	535	0	530	0	0	530	1.63663
19.5017	0	535	0	525	0	525	0	535	0	530	0	525	0	535	0	530	0	0	530	1.63663
19.5127	0	535	0	525	0	525	0	535	0	530	0	525	0	535	0	530	0	0	530	1.63663
19.5238	0	535	0	525	0	525	0	535	0	530	0	525	0	535	0	530	0	0	530	1.63663
19.5348	0	535	0	525	0	525	0	535	0	530	0	525	0	535	0	530	0	0	530	1.63663
19.5459	0	535	0	525	0	525	0	535	0	530	0	525	0	535	0	530	0	0	530	1.63663
19.5569	0	535	0	525	0	525	0	535	0	530	0	525	0	535	0	530	0	0	530	1.63663
19.5679	0	535	0	525	0	525	0	535	0	530	0	525	0	535	0	530	0	0	530	1.63663
19.579	0	535	0	525	0	525	0	535	0	530	0	525	0	535	0	530	0	0	530	1.63663
19.59	0	535	0	525	0	525	0	535	0	530	0	525	0	535	0	530	0	0	530	1.63663
19.6011	0	535	0	525	0	525	0	535	0	530	0	525	0	535	0	530	0	0	530	1.63663
19.6121	0	535	0	525	0	525	0	535	0	530	0	525	0	535	0	530	0	0	530	1.63663
19.6232	0	535	0	525	0	525	0	535	0	530	0	525	0	535	0	530	0	0	530	1.63663
19.6342	0	535	0	525	0	525	0	535	0	530	0	525	0	535	0	530	0	0	530	1.63663
19.6452	0	535	0	525	0	525	0	535	0	530	0	525	0	535	0	530	0	0	530	1.63663
19.6563	0	535	0	525	0	525	0	535	0	530	0	525	0	535	0	530	0	0	530	1.63663
19.6673	0	535	0	525	0	525	0	535	0	530	0	525	0	535	0	530	0	0	530	1.63663
19.6784	0	535	0	525	0	525	0	535	0	530	0	525	0	535	0	530	0	0	530	1.63663
19.6894	0	535	0	525	0	525	0	535	0	530	0	525	0	535	0	530	0	0	530	1.63663
19.7005	0	535	0	525	0	525	0	535	0	530	0	525	0	535	0	530	0	0	530	1.63663
19.7115	0	535	0	525	0	525	0	535	0	530	0	525	0	535	0	530	0	0	530	1.63663
19.7225	0	535	0	525	0	525	0	535	0	530	0	525	0	535	0	530	0	0	530	1.63663
19.7336	0	535	0	525	0	525	0	535	0	530	0	525	0	535	0	530	0	0	530	1.63663
19.7446	0	535	0	525	0	525	0	535	0	530	0	525	0	535	0	530	0	0	530	1.63663
19.7557	0	535	0	525	0	525	0	535	0	530	0	525	0	535	0	530	0	0	530	1.63663
19.7667	0	535	0	525	0	525	0	535	0	530	0	525	0	535	0	530	0	0	530	1.63663
19.7778	0	535	0	525	0	525	0	535	0	530	0	525	0	535	0	530	0	0	530	1.63663
19.7888	0	535	0	525	0	525	0	535	0	530	0	525	0	535	0	530	0	0	530	1.63663
19.7998	0	535	0	525	0	525	0	535	0	530	0	525	0	535	0	530	0	0	530	1.63663
19.8109	0	535	0	525	0	525	0	535	0	530	0	525	0	535	0	530	0	0	530	1.63663
19.8219	0	535	0	525	0	525	0	535	0	530	0	525	0	535	0	530	0	0	530	1.63663
19.833	0	535	0	525	0	525	0	535	0	530	0	525	0	535	0	530	0	0	530	1.63663
19.844	0	535	0	525	0	525	0	535	0	530	0	525	0	535	0	530	0	0	530	1.63663
19.8551	0	535	0	525	0	525	0	535	0	530	0	525	0	535	0	530	0	0	530	1.63663
19.8661	0	535	0	525	0	525	0	535	0	530	0	525	0	535	0	530	0	0	530	1.63663
19.8771	0	535	0	525	0	525	0	535	0	530	0	525	0	535	0	530	0	0	530	1.63663
19.8882	0	535	0	525	0	525	0	535	0	530	0	525	0	535	0	530	0	0	530	1.63663
19.8992	0	535	0	525	0	525	0	535	0	530	0	525	0	535	0	530	0	0	530	1.63663
19.9103	0	535	0	525	0	525	0	535	0	530	0	525	0	535	0	530	0	0	530	1.63663
19.9213	0	535	0	525	0	525	0	535	0	530	0	525	0	535	0	530	0	0	530	1.63663
19.9324	0	535	0	525	0	525	0	535	0	530	0	525	0	535	0	530	0	0	530	1.63663
19.9434	0	535	0	525	0	525	0	535	0	530	0	525	0	535	0	530	0	0	530	1.63663
19.9544	0	535	0	525	0	525	0	535	0	530	0	525	0	535	0	530	0	0	530	1.63663
19.9655	0	535	0	525	0	525	0	535	0	530	0	525	0	535	0	530	0	0	530	1.63663
19.9765	0	535	0	525	0	525	0	535	0	530	0	525	0	535	0	530	0	0	530	1.63663
19.9876	0	535	0	525	0	525	0	535	0	530	0	525	0	535	0	530	0	0	530	1.63663
19.9986	0	535	0	525	0	525	0	535	0	530	0	525	0	535	0	530	0	0	530	1.63663
20.0097	0	535	0	525	0	525	0	535	0	530	0	525	0	535	0	530	0	0	530	1.63663
20.0207	0	535	0	525	0	525	0	535	0	530	0	525	0	535	0	530	0	0	530	1.63663
20.0317	0	535	0	525	0	525	0	535	0	530	0	525	0	535	0	530	0	0	530	1.63663
20.0428	0	535	0	525	0	525	0	535	0	530	0	525	0	535	0	530	0	0	530	1.63663
20.0538	0	535	0	525	0	525	0	535	0	530	0	525	0	535	0	530	0	0	530	1.63663
20.0649	0	535	0	525	0	525	0	535	0	530	0	525	0	535	0	530	0	0	530	1.63663
20.0759	0	535	0	525	0	525	0	535	0	530	0	525	0	535	0	530	0	0	530	1.63663
20.087	0	535	0	525	0	525	0	535	0	530	0	525	0	535	0	530	0	0	530	1.63663
20.098	0	535	0	525	0	525	0	535	0	530	0	525	0	535	0	530	0	0	530	1.63663
20.109	0	535	0	525	0	525	0	535	0	530	0	525	0	535	0	530	0	0	530	1.63663
20.1201	0	535	0	525	0	525	0	535	0	530	0	525	0	535	0	530	0	0	530	1.63663
20.1311	0	535	0	525	0	525	0	535	0	530	0	525	0	535	0	530	0	0	530	1.63663
20.1422	0	535	0	525	0	525	0	535	0	530	0	525	0	535	0	530	0	0	530	1.63663
20.1532	0	535	0	525	0	525	0	535	0	530	0	525	0	535	0	530	0	0	530	1.63663
20.1643	0	535	0	525	0	525	0	535	0	530	0	525	0	535	0	530	0	0	530	1.63663
20.1753	0	535	0	525	0	525	0	535	0	530	0	525	0	535	0	530	0	0	530	1.63663
20.1863	0	535	0	525	0	525	0	535	0	530	0	525	0	535	0	530	0	0	530	1.63663
20.1974	0	535	0	525	0	525	0	535	0	530	0	525	0	535	0	530	0	0	530	1.63663
20.2084	0	535	0	525	0	525	0	535	0	530	0	525	0	535	0	530	0	0	530	1.63663
20.2195	0	535	0	525	0	525	0	535	0	530	0	525	0	535	0	530	0	0	530	1.63663
20.2305	0.33	535	0.84	525	0.48	525	-1.24	535	-0.53	530	-1.07	525	-0.78	535	0.97	530	-0.125	0.311465	530	1.63663
20.2416	-0.41	535	0.76	525	0.47	525	-1.56	535	-0.39	530	-1.2	525	-0.67	535	1.22	530	-0.2225	0.341571	530	1.63663
20.2526	-0.66	535	0.69	525	0.59	525	-1.67	541	-0.34	530	-1.2	531	-0.72	535	1.34	524	-0.24625	0.364329	530.75	2.12762
20.2636	-0.77	535	0.46	525	0.49	525	-1.55	542	-0.33	530	-1.16	532	-0.8	535	1.17	523	-0.31125	0.331002	530.875	2.27908
20.2747	-0.58	535	0.39	525	0.48	525	-1.18	543	-0.31	530	-1.02	533	-0.9	535	0.75	522	-0.29625	0.264514	531	2.44219
20.2857	-0.92	535	0.47	525	0.53	525	-0.64	544	-0.34	530	-0.89	534	-0.95	535	0.25	528	-0.31125	0.225812	532	2.25198
20.2968	-1.17	535	0.25	525	0.43	525	-0.21	538	-0.11	530	-0.63	528	-1.06	535	-0.14	528	-0.33	0.204477	530.5	1.74233
20.3078	-1.02	541	0.17	525	0.33	525	0.04	538	-0.16	530	-0.46	528	-1.07	541	0.11	528	-0.2575	0.191029	532	2.43487
20.3189	-0.57	542	0.08	525	0.4	525	0.19	538	-0.23	530	-0.3	528	-0.99	542	0.77	528	-0.08125	0.197777	532.25	2.5687
20.3299	-0.37	536	-0.1	525	0.39	525	0.19	538	-0.4	530	-0.19	528	-0.91	536	1.48	528	0.01125	0.251733	530.75	1.83955
20.3409	-0.24	536	-0.3	525	0.3	525	0.13	538	-0.24	530	-0.21	528	-0.93	536	2.21	521	0.09	0.328427	529.875	2.19933
20.352	0.05	536	-0.25	525	0.32	525	-0.31	538	-0.17	530	-0.23	528	-0.9	536	2.36	513	0.10875	0.34409	528.875	2.89357
20.363	0.08	536	-0.23	525	0.31	525	-0.52	538	-0.16	530	-0.3	528	-0.9	536	2.48	512	0.095	0.364241	528.75	2.99255
20.3741	-0.11	536	-0.21	525	0.37	525	-0.51	538	-0.22	530	-0.37	528	-0.94	536	1.99	510	0	0.312884	528.5	3.19598
20.3851	0.11	536	-0.19	525	0.4	525	-0.49	538	-0.07	530	-0.32	528	-0.99	536	1.6	515	0.00625	0.270429	529.125	2.7021
20.3962	0.28	536	0.07	525	0.42	525	-0.45	538	-0.13	530	-0.27	528	-0.89	536	0.93	514	-0.005	0.198602	529	2.79668
20.4072	0.4	536	0.2	525	0.51	525	-0.51	538	-0.26	530	-0.41	528	-0.91	536	0.3	520	-0.085	0.180089	529.75	2.27368
20.4182	0.37	536	0.35	525	0.58	525	-0.29	538	-0.3	530	-0.4	528	-0.92	536	0.04	520	-0.07125	0.176133	529.75	2.27368
20.4293	0.58	536	0.28	525	0.6	525	-0.01	538	-0.39	530	-0.54	528	-0.77	536	0.12	520	-0.01625	0.180465	529.75	2.27368
20.4403	0.96	536	0.25	525	0.49	525	0.14	538	-0.65	530	-0.61	528	-0.83	536	0.37	520	0.015	0.226085	529.75	2.27368
20.4514	0.89	536	0.26	525	0.46	525	0.29	538	-0.78	530	-0.55	528	-1.04	536	0.55	520	0.01	0.248193	529.75	2.27368
20.4624	0.75	536	0.21	525	0.41	525	0.43	538	-0.92	530	-0.56	528	-0.9	543	0.68	520	0.0125	0.246067	530.625	2.73821
20.4735	0.85	536	0.13	525	0.45	525	0.11	538	-1.03	530	-0.74	528	-0.97	537	0.57	520	-0.07875	0.259763	529.875	2.32561
20.4845	0.88	536	0.13	525	0.47	525	-0.18	538	-0.98	536	-0.72	528	-0.77	537	0.78	520	-0.04875	0.257241	530.625	2.44903
20.4955	0.7	536	-0.05	525	0.34	525	-0.34	538	-0.8	530	-0.72	528	-0.67	537	1.03	520	-0.06375	0.244927	529.875	2.32561
20.5066	0.44	536	0.05	525	0.41	525	-0.31	538	-0.74	530	-0.72	528	-0.7	537	1.25	513	-0.04	0.252346	529	2.93987
20.5176	0.38	536	0.13	525	0.4	525	-0.28	538	-0.69	530	-0.77	528	-0.78	537	1.35	512	-0.0325	0.2636	528.875	3.03808
20.5287	0.64	536	0.06	525	0.39	525	-0.3	538	-0.67	530	-0.73	528	-0.77	537	0.95	511	-0.05375	0.235637	528.75	3.13819
20.5397	0.78	536	-0.08	525	0.5	525	-0.25	538	-0.78	530	-0.57	528	-0.73	537	0.11	517	-0.1275	0.201581	529.5	2.57044
20.5508	0.69	536	-0.05	525	0.74	525	-0.28	538	-0.69	530	-0.52	528	-0.84	537	-0.29	517	-0.155	0.209105	529.5	2.57044
20.5618	0.15	536	-0.1	525	0.68	525	-0.61	538	-0.72	530	-0.58	528	-0.77	537	-0.32	517	-0.28375	0.177934	529.5	2.57044
20.5728	-0.45	536	0.02	525	0.7	525	-0.69	538	-0.51	530	-0.68	528	-0.9	537	-0.16	517	-0.33375	0.181068	529.5	2.57044
20.5839	-0.65	536	0.07	525	0.75	525	-0.65	538	-0.56	530	-0.74	528	-0.99	537	0	517	-0.34625	0.202422	529.5	2.57044
20.5949	-0.66	536	0.14	525	0.62	525	-0.7	538	-0.57	530	-0.77	528	-0.98	537	0.39	517	-0.31625	0.2138	529.5	2.57044
20.606	-0.2	536	0.18	525	0.66	525	-0.68	538	-0.4	530	-0.87	528	-1.06	537	0.93	517	-0.18	0.25413	529.5	2.57044
20.617	0.29	536	0.15	525	0.71	525	-0.53	538	-0.38	530	-0.72	528	-1.06	544	0.96	517	-0.0725	0.252047	530.375	3.04101
20.6281	0.28	536	0.05	525	0.66	525	-0.4	538	-0.43	530	-0.78	528	-0.91	545	1.25	517	-0.035	0.262223	530.5	3.1225
20.6391	0.08	536	-0.14	525	0.76	525	-0.44	538	-0.66	530	-0.82	528	-0.79	539	1.17	510	-0.105	0.260837	528.875	3.34043
20.6501	-0.27	536	-0.27	525	0.67	525	-0.18	538	-0.8	530	-0.77	528	-0.72	539	0.84	509	-0.1875	0.223717	528.75	3.44212
20.6612	-0.68	536	-0.34	525	0.62	525	-0.16	538	-0.95	530	-0.81	528	-0.67	539	0.32	515	-0.33375	0.198512	529.5	2.85982
20.6722	-0.66	536	-0.16	525	0.52	525	-0.16	538	-0.89	530	-0.79	528	-0.88	539	-0.07	515	-0.38625	0.17724	529.5	2.85982
20.6833	-0.33	536	0.03	525	0.47	525	-0.1	538	-0.69	530	-0.75	528	-0.83	539	-0.13	515	-0.29125	0.15848	529.5	2.85982
20.6943	-0.21	536	0.04	525	0.43	525	-0.05	538	-0.47	530	-0.73	528	-0.77	539	-0.08	515	-0.23	0.144111	529.5	2.85982
20.7054	-0.29	536	0.09	525	0.42	525	-0.01	538	-0.43	530	-0.85	528	-0.8	539	0.33	515	-0.1925	0.170532	529.5	2.85982
20.7164	-0.27	536	0.19	525	0.4	525	-0.02	538	-0.58	530	-0.87	528	-0.86	539	0.47	515	-0.1925	0.190242	529.5	2.85982
20.7274	-0.07	536	0.07	525	0.44	525	-0.05	538	-0.51	530	-0.79	528	-0.9	539	0.31	515	-0.1875	0.174997	529.5	2.85982
20.7385	-0.1	536	0.05	525	0.38	525	-0.27	538	-0.64	530	-0.84	528	-0.79	539	0.25	515	-0.245	0.166444	529.5	2.85982
20.7495	0.02	536	0.08	525	0.35	525	-0.38	538	-0.65	530	-0.86	528	-0.77	539	0.37	515	-0.23	0.176392	529.5	2.85982
20.7606	0.26	536	0.29	525	0.31	525	-0.08	538	-0.67	530	-0.82	528	-0.87	539	0.25	515	-0.16625	0.18774	529.5	2.85982
20.7716	0.48	536	0.33	525	0.25	525	-0.05	538	-0.68	530	-0.8	528	-0.92	539	0.32	515	-0.13375	0.203206	529.5	2.85982
20.7827	0.73	536	0.28	525	0.24	525	-0.4	538	-0.87	530	-0.81	528	-0.76	539	0.24	515	-0.16875	0.217506	529.5	2.85982
20.7937	0.6	536	0.28	525	0.24	525	-0.72	538	-0.9	530	-0.78	528	-0.84	539	0.04	515	-0.26	0.21544	529.5	2.85982
20.8047	0.38	536	0.19	525	0.17	525	-0.71	538	-0.93	530	-0.77	528	-0.99	539	-0.5	515	-0.395	0.196087	529.5	2.85982
20.8158	0.13	536	0.18	525	0.1	525	-0.96	538	-0.99	530	-0.77	528	-1.18	539	-0.56	515	-0.50625	0.198638	529.5	2.85982
20.8268	0.44	536	-0.03	525	0.1	525	-1.19	538	-1.03	530	-0.77	528	-1.18	546	-0.7	515	-0.545	0.222831	530.375	3.3644
20.8379	0.9	536	-0.21	525	0.07	525	-1.38	545	-1.06	537	-0.78	528	-1.15	547	-0.77	515	-0.5475	0.267687	532.25	3.86722
20.8489	1.36	536	-0.25	525	0.02	525	-1.15	546	-1.19	538	-0.79	528	-1.08	548	-0.65	515	-0.46625	0.302519	532.625	4.01754
20.86	1.45	531	-0.05	525	0.17	525	-0.99	547	-1.21	539	-0.84	528	-1.04	548	-0.68	515	-0.39875	0.314974	532.25	4.08285
20.871	1.31	530	0.23	525	0.21	525	-0.66	541	-0.87	540	-0.93	528	-1.08	549	-0.55	515	-0.2925	0.288313	531.625	3.8727
20.882	1.11	529	0.39	525	0.28	525	-0.34	541	-0.41	534	-0.99	528	-1.09	550	-0.6	515	-0.20625	0.265053	530.875	3.80525
20.8931	0.6	528	0.46	525	0.35	525	-0.01	541	-0.02	534	-0.97	528	-1.19	551	-0.45	515	-0.15375	0.233949	530.875	3.90712
20.9041	-0.01	534	0.63	525	0.31	525	0.15	541	0.13	534	-1.01	528	-1	552	-0.1	515	-0.1125	0.209649	531.75	3.98994
20.9152	-0.64	534	0.48	525	0.34	525	0.26	541	0.16	534	-1.11	535	-1.01	546	0.18	515	-0.1675	0.227916	531.875	3.4869
20.9262	-1.18	534	0.32	525	0.32	525	0.34	541	-0.07	534	-1.09	536	-1.02	553	0.22	515	-0.27	0.246815	532.875	4.06833
20.9373	-1.47	539	0.1	525	0.34	525	0.36	541	-0.22	534	-0.87	537	-0.83	554	0.02	515	-0.32125	0.234714	533.75	4.23738
20.9483	-1.62	540	-0.05	525	0.34	525	0.42	541	-0.43	534	-0.68	531	-0.89	548	0.12	515	-0.34875	0.246391	532.375	3.7604
20.9593	-1.47	541	-0.17	525	0.37	525	0.36	541	-0.35	534	-0.6	531	-0.88	548	0.43	515	-0.28875	0.240204	532.5	3.7985
20.9704	-1.23	542	-0.2	525	0.33	525	0.41	541	-0.43	534	-0.52	531	-0.78	548	0.48	515	-0.2425	0.217681	532.625	3.84028
20.9814	-0.68	543	-0.13	525	0.26	525	0.15	541	-0.44	534	-0.53	531	-0.62	548	0.53	515	-0.1825	0.16051	532.75	3.88564
20.9925	-0.1	537	-0.17	525	0.27	525	0.03	541	-0.44	534	-0.48	531	-0.82	548	0.83	515	-0.11	0.179344	532	3.66937
21.0035	0.55	537	-0.29	525	0.28	525	-0.12	541	-0.32	534	-0.42	531	-0.8	548	1.1	515	-0.0025	0.21581	532	3.66937
21.0146	0.86	537	-0.44	525	0.29	525	-0.29	541	-0.28	534	-0.47	531	-0.82	548	1.7	508	0.06875	0.296566	531.125	4.29883
21.0256	0.86	537	-0.31	525	0.2	525	-0.43	541	-0.35	534	-0.55	531	-0.64	548	2.01	508	0.09875	0.323411	531.125	4.29883
21.0366	0.66	537	-0.06	525	0.25	525	-0.32	541	-0.24	534	-0.73	531	-0.57	548	1.8	500	0.09875	0.289133	530.125	5.10755
21.0477	0.34	537	0.14	525	0.31	525	-0.32	541	-0.23	534	-0.7	531	-0.69	548	1.03	505	-0.015	0.207528	530.75	4.59328
21.0587	0.32	537	0.19	525	0.31	525	-0.51	541	-0.4	534	-0.62	531	-0.64	548	0.18	504	-0.14625	0.152947	530.625	4.69398
21.0698	0.45	537	0.16	525	0.34	525	-0.75	541	-0.74	534	-0.48	531	-0.67	548	-0.58	510	-0.28375	0.180544	531.375	4.10982
21.0808	0.46	537	-0.05	525	0.35	525	-0.87	541	-0.92	534	-0.43	531	-0.72	548	-1.11	510	-0.41125	0.212228	531.375	4.10982
21.0919	0.7	537	-0.03	525	0.35	525	-0.97	541	-0.93	534	-0.5	531	-0.68	548	-1.44	516	-0.4375	0.256137	532.125	3.58786
21.1029	0.87	537	-0.04	525	0.3	525	-0.49	541	-0.77	534	-0.38	531	-0.78	548	-1.34	517	-0.32875	0.245142	532.25	3.50892
21.1139	0.85	537	0.03	525	0.28	525	-0.08	541	-0.78	534	-0.35	531	-0.75	548	-0.94	518	-0.2175	0.215752	532.375	3.43271
21.125	0.99	537	0.07	525	0.34	525	0.31	541	-0.69	534	-0.36	531	-0.7	548	-0.28	512	-0.04	0.2052	531.625	3.92764
21.136	1.51	537	0.04	525	0.44	525	0.83	541	-0.7	534	-0.35	531	-0.76	548	0.4	512	0.17625	0.275998	531.625	3.92764
21.1471	1.94	531	0.09	525	0.47	525	1	541	-0.51	534	-0.47	531	-0.9	548	0.47	512	0.26125	0.326193	530.875	3.85189
21.1581	1.84	531	0.02	525	0.45	525	0.85	541	-0.37	534	-0.63	531	-0.69	548	0.31	512	0.2225	0.299432	530.875	3.85189
21.1692	1.08	530	-0.03	525	0.36	525	0.63	541	-0.24	534	-0.77	531	-0.67	548	0.08	512	0.055	0.222622	530.75	3.85334
21.1802	0.3	529	0.08	525	0.37	525	0.59	541	-0.43	534	-0.79	531	-0.56	548	0.06	512	-0.0475	0.173697	530.625	3.85884
21.1912	-0.47	535	0.34	525	0.28	525	0.48	541	-0.65	534	-0.85	531	-0.64	548	-0.02	512	-0.19125	0.184569	531.375	3.8865
21.2023	-1.12	535	0.47	525	0.24	525	0.15	541	-0.65	534	-0.72	531	-0.62	548	0.3	512	-0.24375	0.211094	531.375	3.8865
21.2133	-1.67	540	0.32	525	0.21	525	-0.29	541	-0.65	534	-0.62	531	-0.72	548	0.27	512	-0.39375	0.2382	532	4.01782
21.2244	-1.81	541	0.01	525	0.26	525	-1.09	541	-0.5	534	-0.7	531	-0.74	548	0.37	512	-0.525	0.258823	532.125	4.05514
21.2354	-1.37	542	-0.11	525	0.31	525	-1.26	548	-0.61	534	-0.65	531	-0.78	548	0.79	512	-0.46	0.264136	533.125	4.44184
21.2465	-0.87	543	-0.29	525	0.29	525	-1.59	548	-0.58	534	-0.64	531	-0.88	548	1.1	512	-0.4325	0.289308	533.25	4.47912
21.2575	-0.52	537	-0.42	525	0.34	525	-1.8	549	-0.53	534	-0.53	531	-0.8	548	0.71	506	-0.44375	0.265013	531.875	4.90786
21.2685	-0.2	537	-0.25	525	0.38	525	-1.59	550	-0.48	534	-0.66	531	-0.78	548	0.05	512	-0.44125	0.211047	532.75	4.43907
21.2796	-0.4	537	-0.17	525	0.3	525	-1.1	551	-0.29	534	-0.71	531	-0.68	548	-0.5	512	-0.44375	0.147248	532.875	4.50966
21.2906	-0.6	537	-0.15	525	0.24	525	-0.73	552	-0.14	534	-0.88	531	-0.8	548	-0.77	512	-0.47875	0.144314	533	4.58258
21.3017	-0.59	537	-0.25	525	0.33	525	-0.43	546	-0.27	534	-0.97	531	-0.76	548	-0.93	512	-0.48375	0.151692	532.25	4.18223
21.3127	-0.27	537	-0.12	525	0.48	525	-0.03	546	-0.49	534	-0.93	531	-0.72	548	-0.47	512	-0.31875	0.15527	532.25	4.18223
21.3238	-0.11	537	0	525	0.47	525	0.31	546	-0.55	534	-0.85	531	-0.76	548	-0.3	512	-0.22375	0.170146	532.25	4.18223
21.3348	0	537	0.01	525	0.58	525	0.57	546	-0.53	534	-0.81	531	-0.78	548	-0.21	512	-0.14625	0.192715	532.25	4.18223
21.3458	-0.27	537	-0.01	525	0.59	525	0.71	546	-0.74	534	-0.77	531	-0.8	548	-0.07	512	-0.17	0.210416	532.25	4.18223
21.3569	-0.3	537	-0.02	525	0.62	525	0.75	546	-0.76	534	-0.81	531	-0.92	548	0.29	512	-0.14375	0.232847	532.25	4.18223
21.3679	-0.14	537	0.06	525	0.7	525	0.97	546	-0.89	534	-0.87	531	-0.85	548	0.37	512	-0.08125	0.260826	532.25	4.18223
21.379	-0.06	537	-0.08	525	0.77	525	1.02	546	-0.87	534	-0.89	531	-0.72	548	0.54	512	-0.03625	0.266987	532.25	4.18223
21.39	-0.08	537	-0.22	525	0.72	525	1.27	540	-0.79	534	-0.88	531	-0.73	548	0.77	512	0.0075	0.290011	531.5	3.88679
21.4011	-0.07	537	-0.24	525	0.68	525	1.27	539	-0.91	534	-1.01	531	-0.74	548	1.23	512	0.02625	0.328443	531.375	3.84957
21.4121	-0.27	537	-0.02	525	0.78	525	1	538	-1.18	534	-1	538	-0.86	548	0.88	505	-0.08375	0.314302	531.25	4.58939
21.4231	-0.23	537	0.04	525	0.66	525	0.7	537	-1.32	541	-0.94	532	-0.88	548	0.67	511	-0.1625	0.287171	532	4.06641
21.4342	-0.16	537	0.01	525	0.59	525	0.39	543	-1.38	542	-0.81	532	-0.73	548	0.45	511	-0.205	0.249485	532.875	4.29883
21.4452	0.09	537	0.08	525	0.53	525	0.38	543	-1.37	543	-0.73	532	-0.72	548	0.36	511	-0.1725	0.24126	533	4.33837
21.4563	0.41	537	0.03	525	0.41	525	0.33	543	-1.27	543	-0.75	532	-0.71	548	0.72	511	-0.10375	0.252055	533	4.33837
21.4673	0.16	537	-0.09	525	0.36	525	0.37	543	-0.92	544	-0.87	532	-0.84	548	0.72	511	-0.13875	0.23043	533.125	4.38112
21.4784	0.24	537	-0.2	525	0.38	525	0.68	543	-0.51	539	-0.92	532	-0.79	548	0.81	511	-0.03875	0.234486	532.5	4.20034
21.4894	0.8	537	-0.35	525	0.36	525	0.93	543	-0.28	539	-0.93	532	-0.8	548	0.98	511	0.08875	0.275087	532.5	4.20034
21.5004	1.39	537	-0.33	525	0.4	525	0.99	543	-0.02	539	-0.95	532	-0.58	548	0.71	511	0.20125	0.286621	532.5	4.20034
21.5115	1.64	531	-0.17	525	0.35	525	0.94	543	0.01	539	-0.97	532	-0.69	548	0.47	511	0.1975	0.300314	531.75	4.15224
21.5225	1.77	531	0.02	525	0.28	525	1.03	543	0.04	539	-0.99	532	-0.69	548	0.2	511	0.2075	0.311275	531.75	4.15224
21.5336	1.27	530	-0.02	525	0.24	525	1.15	536	0.04	539	-0.99	532	-0.71	548	0.19	511	0.14625	0.278522	530.75	3.8994
21.5446	0.51	529	-0.17	525	0.22	525	1.11	535	0.09	539	-0.83	532	-0.87	548	0.37	511	0.05375	0.236688	530.5	3.88219
21.5557	-0.28	535	-0.32	525	0.14	525	0.82	535	0.13	539	-0.94	532	-0.89	548	0.79	511	-0.06875	0.237234	531.25	3.91312
21.5667	-0.95	535	-0.22	525	0.12	525	0.51	540	0.38	539	-0.94	532	-0.98	548	1.28	511	-0.1	0.291921	531.875	4.04633
21.5777	-1.5	535	-0.1	525	0	525	0.35	540	0.4	539	-0.88	532	-0.82	548	1.37	504	-0.1475	0.318819	531	4.72833
21.5888	-1.77	540	0	525	-0.04	525	0.35	540	0.27	539	-0.95	532	-0.72	548	1.11	503	-0.21875	0.31623	531.5	4.94614
21.5998	-1.73	541	-0.04	525	-0.05	525	0.32	540	-0.08	539	-1.02	532	-0.97	548	0.75	502	-0.3525	0.288331	531.5	5.08148
21.6109	-1.58	542	0.12	525	-0.02	525	0.3	540	-0.23	539	-1.04	538	-0.81	548	0.25	508	-0.37625	0.243552	533.125	4.56867
21.6219	-0.94	543	0.13	525	-0.01	525	0.4	540	-0.12	539	-1.15	539	-0.88	548	-0.21	508	-0.3475	0.200444	533.375	4.625
21.633	-0.18	537	0.08	525	0.04	525	0.66	540	-0.09	539	-1.18	540	-1.09	548	-0.26	508	-0.2525	0.216389	532.75	4.48708
21.644	0.56	537	0.01	525	0.07	525	0.6	540	-0.27	539	-0.81	541	-1.03	555	-0.49	508	-0.17	0.210331	533.75	4.99553
21.655	1.14	537	-0.07	525	0.1	525	0.45	540	-0.32	539	-0.6	535	-0.85	556	-0.37	508	-0.065	0.223806	533.125	4.97651
21.6661	1.43	531	-0.15	525	0.18	525	0.24	540	-0.16	539	-0.51	535	-0.78	550	-0.12	508	0.01625	0.233903	531.625	4.47189
21.6771	1.55	531	-0.21	525	0.14	525	0.23	540	-0.24	539	-0.48	535	-0.64	550	-0.07	508	0.035	0.239486	531.625	4.47189
21.6882	1.5	530	-0.09	525	0.16	525	-0.09	540	-0.45	539	-0.48	535	-0.6	550	-0.37	508	-0.0525	0.239029	531.5	4.47613
21.6992	1.23	529	-0.12	525	0.19	525	-0.22	540	-0.52	539	-0.36	535	-0.68	550	-0.61	508	-0.13625	0.219488	531.375	4.48385
21.7103	0.81	528	-0.22	525	0.25	525	-0.44	540	-0.66	539	-0.41	535	-0.59	550	-0.47	508	-0.21625	0.17724	531.25	4.49504
21.7213	0.22	534	-0.26	525	0.33	525	-0.24	540	-0.62	539	-0.48	535	-0.6	550	-0.28	508	-0.24125	0.124649	532	4.48011
21.7323	-0.7	534	-0.13	525	0.26	525	-0.09	540	-0.49	539	-0.45	535	-0.68	550	0.05	508	-0.27875	0.124534	532	4.48011
21.7434	-1.33	534	-0.11	525	0.24	525	-0.03	540	-0.36	539	-0.52	535	-0.64	550	0.42	508	-0.29125	0.195799	532	4.48011
21.7544	-1.64	539	0.01	525	0.33	525	0.07	540	-0.22	539	-0.39	535	-0.82	550	0.92	508	-0.2175	0.272041	532.625	4.56281
21.7655	-1.88	540	0.11	525	0.34	525	0.22	540	-0.14	539	-0.44	535	-0.73	550	0.98	508	-0.1925	0.302388	532.75	4.58939
21.7765	-1.61	541	-0.02	525	0.29	525	0.28	540	-0.09	539	-0.39	535	-0.69	550	1.14	508	-0.13625	0.284805	532.875	4.6192
21.7876	-1.1	542	0	525	0.2	525	0.29	540	0.06	539	-0.51	535	-0.68	550	1.19	501	-0.06875	0.247793	532.125	5.35336
21.7986	-0.68	543	-0.1	525	0.27	525	0.34	540	-0.03	539	-0.64	535	-0.7	550	1.18	500	-0.045	0.229035	532.125	5.49167
21.8096	-0.26	537	-0.26	525	0.36	525	0.13	540	0.21	539	-0.76	535	-0.7	550	0.58	499	-0.0875	0.172614	531.25	5.43386
21.8207	0.41	537	-0.33	525	0.37	525	0.17	540	0.51	539	-0.81	535	-0.75	550	-0.22	505	-0.08125	0.185024	532	4.81441
21.8317	0.57	537	-0.28	525	0.32	525	0.01	540	0.64	539	-0.85	535	-0.95	550	-0.9	505	-0.18	0.234947	532	4.81441
21.8428	0.48	537	-0.39	525	0.28	525	-0.04	540	0.63	539	-0.71	535	-1.02	550	-1.2	505	-0.24625	0.244905	532	4.81441
21.8538	0.25	537	-0.46	525	0.17	525	-0.07	540	0.54	539	-0.75	535	-0.95	557	-1.15	512	-0.3025	0.217738	533.75	4.71604
21.8649	0.34	537	-0.53	525	0.14	525	0.08	540	0.34	539	-0.73	535	-0.98	551	-0.97	513	-0.28875	0.202894	533.125	4.13365
21.8759	0.27	537	-0.47	525	0.14	525	0.34	540	0.21	539	-0.73	535	-0.9	551	-0.55	507	-0.21125	0.177356	532.375	4.68637
21.8869	-0.07	537	-0.36	525	0.18	525	0.7	540	0.31	539	-0.76	535	-0.77	551	0.03	507	-0.0925	0.182049	532.375	4.68637
21.898	-0.36	537	-0.21	525	0.34	525	0.81	540	0.58	539	-0.78	535	-0.93	551	0.43	507	-0.015	0.229059	532.375	4.68637
21.909	-0.55	537	-0.21	525	0.46	525	0.58	540	0.86	539	-0.85	535	-0.76	551	0.76	507	0.03625	0.25005	532.375	4.68637
21.9201	-0.72	537	-0.13	525	0.57	525	0.7	540	1.22	539	-0.88	535	-0.63	551	0.55	507	0.085	0.275636	532.375	4.68637
21.9311	-0.94	537	-0.16	525	0.57	525	0.66	540	1.36	532	-0.84	535	-0.74	551	0.58	507	0.06125	0.301155	531.5	4.59036
21.9422	-0.9	537	0.01	525	0.65	525	0.8	540	1.64	531	-0.68	535	-0.86	551	0.49	507	0.14375	0.322905	531.375	4.59012
21.9532	-0.98	537	-0.04	525	0.64	525	0.91	540	1.45	530	-0.66	535	-0.94	551	0.34	507	0.09	0.31826	531.25	4.59328
21.9642	-0.89	537	-0.28	525	0.59	525	1.24	540	1.32	530	-0.78	535	-1	551	0.24	507	0.055	0.331134	531.25	4.59328
21.9753	-0.16	537	-0.49	525	0.51	525	1.37	534	0.94	529	-0.88	535	-0.99	551	-0.1	507	0.025	0.300173	530.375	4.45188
21.9863	0.36	537	-0.73	525	0.59	525	1.38	533	0.53	534	-1.01	535	-0.83	551	-0.32	507	-0.00375	0.299022	530.875	4.45789
21.9974	0.44	537	-0.79	525	0.55	525	1.37	532	0.23	534	-1	542	-0.91	551	0	507	-0.01375	0.295096	531.625	4.65195
22.0084	0.55	537	-0.84	525	0.5	525	1.05	531	-0.02	534	-0.92	536	-0.81	551	0.02	507	-0.05875	0.261735	530.75	4.46714
22.0195	0.91	537	-1.01	525	0.49	525	0.58	531	-0.28	534	-0.94	536	-0.78	551	-0.21	507	-0.155	0.2621	530.75	4.46714
22.0305	0.84	537	-1.03	531	0.54	525	0.19	535	-0.29	534	-1.02	536	-0.77	551	-0.37	507	-0.23875	0.249732	532	4.41183
22.0415	1.07	537	-0.94	532	0.51	525	-0.33	535	-0.24	534	-0.96	543	-0.78	551	-0.36	507	-0.25375	0.253532	533	4.60202
22.0526	1.34	531	-0.71	526	0.51	525	-0.66	535	-0.33	534	-0.99	537	-0.76	551	-0.38	507	-0.2475	0.277629	530.75	4.42699
22.0636	1.38	531	-0.26	526	0.41	525	-0.91	535	-0.23	534	-0.97	537	-0.77	551	-0.23	507	-0.1975	0.276965	530.75	4.42699
22.0747	0.68	530	0.06	526	0.49	525	-0.99	535	-0.22	534	-0.93	537	-0.81	551	-0.03	507	-0.21875	0.22653	530.625	4.42774
[truncated: 521 more rows]

## Sheet: ED Figure 2F
PID control + Kalman	I-controller	PID control + Kalman	I-controller
0 → -5	0 → -5	-5 → 5	-5 → 5
0.0768	0.0984	0.1646	0.2406
0.0994	0.0766	0.2981	0.1095
0.077	0.1203	0.1431	0.2078
0.066	0.088	0.3519	0.2201
0.0658	0.1205	0.1424	0.2849
0.1208	0.1315	0.2635	0.3506
0.2964	0.3473	0.2635	0.2605
0.0883	0.3708	0.0993	0.2508
	0.1971		0.1424
	0.0782		0.1118
	0.0783		0.1006
	0.0984		0.295
	0.0978		0.2065
	0.0978		0.2825
	0.1195		0.5325
	0.0997		0.277
	0.0981		0.1853
	0.0872		0.1963
	0.0869		0.2174
	0.1196		0.2501
	0.2393		0.0869
	0.0761		0.0979
	p-value:
Comparison 0 → -5	0.52321
Comparison -5 → 5	0.85972
