# Supplementary material for: All-optical closed-loop voltage clamp for precise control of muscles and neurons in live animals
Source: Research Square preprint supplement (doi:10.21203/rs.3.rs-1505565/v1), 2023-03-29
Supplement: Supplementary file 5 [file 31b208bf5c2efd75c2df935a.xlsx]

## Sheet: ED table 1
#	ADU	number of pixels	e-/pixel	e-/ROI	Photons/pixel	Photons/ROI	photon shot noise / pixel	photon shot noise / ROI	accuracy/pixel	accuracy/ROI
1	14568	361	3350.64	1.20958e+06	3851.31	1.39032e+06	62.0589	1179.12	1.61137	0.084809
2	19551	238	4496.73	1.07022e+06	5168.66	1.23014e+06	71.8934	1109.12	1.39095	0.0901618
3	25270	338	5812.1	1.96449e+06	6680.57	2.25803e+06	81.7348	1502.68	1.22347	0.066548
4	12589	600	2895.47	1.73728e+06	3328.13	1.99688e+06	57.6899	1413.11	1.73341	0.070766
5	16268	527	3741.64	1.97184e+06	4300.74	2.26649e+06	65.58	1505.49	1.52486	0.0664237
6	24579	294	5653.17	1.66203e+06	6497.9	1.91038e+06	80.6095	1382.17	1.24055	0.0723502
7	13598	495	3127.54	1.54813e+06	3594.87	1.77946e+06	59.9573	1333.96	1.66785	0.0749645
8	14421	504	3316.83	1.67168e+06	3812.45	1.92147e+06	61.745	1386.17	1.61956	0.0721411
9	14547	504	3345.81	1.68629e+06	3845.76	1.93826e+06	62.0142	1392.21	1.61253	0.071828
10	12632	480	2905.36	1.39457e+06	3339.49	1.60296e+06	57.7884	1266.08	1.73045	0.078984
11	16153	324	3715.19	1.20372e+06	4270.33	1383588	65.3478	1176.26	1.53027	0.0850152
12	23116	374	5316.68	1.98844e+06	6111.13	2.28556e+06	78.1737	1511.81	1.2792	0.066146
13	14548	221	3346.04	739475	3846.02	849971	62.0163	921.939	1.61248	0.108467
14	13814	221	3177.22	702166	3651.98	807087	60.4316	898.38	1.65476	0.111311
15	15585	208	3584.55	745586	4120.17	856996	64.1886	925.741	1.55791	0.108022
16	15000	361	3450	1245450	3965.52	1.43155e+06	62.9724	1196.47	1.588	0.0835789
17	50182	176	11541.9	2.03137e+06	13266.5	2.33491e+06	115.18	1528.04	0.868204	0.0654433
18	45187	378	10393	3.92856e+06	11946	4.51558e+06	109.298	2124.99	0.914932	0.047059
19	38318	475	8813.14	4.18624e+06	10130	4.81177e+06	100.648	2193.58	0.99356	0.0455877
20	37073	475	8526.79	4.05023e+06	9800.91	4.65543e+06	98.9995	2157.64	1.01011	0.0463468
21	15368	418	3534.64	1.47748e+06	4062.8	1.69825e+06	63.7401	1303.17	1.56887	0.076736
22	12457	182	2865.11	521450	3293.23	599368	57.3867	774.189	1.74256	0.129168
23	13301	135	3059.23	412996	3516.36	474708	59.2989	688.991	1.68637	0.14514
24	18731	252	4308.13	1.08565e+06	4951.87	1.24787e+06	70.3695	1117.08	1.42107	0.0895189
25	12978	154	2984.94	459681	3430.97	528369	58.5744	726.89	1.70723	0.137572
26	15994	552	3678.62	2.0306e+06	4228.3	2.33402e+06	65.0254	1527.75	1.53786	0.0654557
27	15057	384	3463.11	1.32983e+06	3980.59	1.52855e+06	63.0919	1236.34	1.58499	0.0808837
28	16163	384	3717.49	1.42752e+06	4272.98	1.64082e+06	65.368	1280.95	1.5298	0.0780673
29	12623	256	2903.29	743242	3337.11	854301	57.7678	924.284	1.73107	0.108192
30	21742	224	5000.66	1.12015e+06	5747.89	1.28753e+06	75.8148	1134.69	1.319	0.0881296
Mean	19713.8	349.833	4534.17	1.5782e+06	5211.69	1.81402e+06	70.4922	1293.98	1.47311	0.0838272
SEM	1824.84	24.1447	419.714	176770	482.43	203184	2.89197	69.3929	0.0465873	0.00453898
