# Supplementary material for: All-optical closed-loop voltage clamp for precise control of muscles and neurons in live animals
Source: Research Square preprint supplement (doi:10.21203/rs.3.rs-1505565/v1), 2023-03-29
Supplement: Supplementary file 6 [file 425eae43f968f28400e7381b.xlsx]

## Sheet: Figure 5B
Title: 1 Date: 2021/09/07 14:17
Parameters for step (1): Holding dF/F0: 0.0 % Tolerance range: -1.0 - 1.0 % Exposure time: 10 ms Binning: 4x4
Parameters for step (2): Holding dF/F0: -3.0 % Tolerance range: -4.0 - -2.0 %
Parameters for step (3): Holding dF/F0: 3.0 % Tolerance range: 2.0 - 4.0 %
Bleaching correction function: exp. offset = 84578,56 * exp(-0,0000 * x) + -46417,51 R^2: 0,9388 Video duration: 27,45 s Framerate: 91,81
# Measurement	Time	F	F_bleach_correct	dF/F0	dF/F0_bleach_correct	Wavelength	Info	Step
0	0.0109	38691.5	0	?	0	535	Calibration	-
1	0.0218	38639.5	0	?	0	535	Calibration	-
2	0.0327	38642.8	0	?	0	535	Calibration	-
3	0.0436	38703.5	0	?	0	535	Calibration	-
4	0.0545	38501	0	?	0	535	Calibration	-
5	0.0654	38360.6	0	?	0	535	Calibration	-
6	0.0762	38496.7	0	?	0	535	Calibration	-
7	0.0871	38451.3	0	?	0	535	Calibration	-
8	0.098	38410.2	0	?	0	535	Calibration	-
9	0.1089	38322.3	0	?	0	535	Calibration	-
10	0.1198	38423.2	0	?	0	535	Calibration	-
11	0.1307	38499.2	0	?	0	535	Calibration	-
12	0.1416	38333.1	0	?	0	535	Calibration	-
13	0.1525	38425.8	0	?	0	535	Calibration	-
14	0.1634	38394	0	?	0	535	Calibration	-
15	0.1743	38278.5	0	?	0	535	Calibration	-
16	0.1852	38359.1	0	?	0	535	Calibration	-
17	0.1961	38320.7	0	?	0	535	Calibration	-
18	0.207	38475.5	0	?	0	535	Calibration	-
19	0.2178	38215.3	0	?	0	535	Calibration	-
20	0.2287	38366.2	0	?	0	535	Calibration	-
21	0.2396	38296.1	0	?	0	535	Calibration	-
22	0.2505	38361.7	0	?	0	535	Calibration	-
23	0.2614	38429.5	0	?	0	535	Calibration	-
24	0.2723	38280.5	0	?	0	535	Calibration	-
25	0.2832	38299.8	0	?	0	535	Calibration	-
26	0.2941	38187.5	0	?	0	535	Calibration	-
27	0.305	38236	0	?	0	535	Calibration	-
28	0.3159	38342	0	?	0	535	Calibration	-
29	0.3268	38180.3	0	?	0	535	Calibration	-
30	0.3377	38379.1	0	?	0	535	Calibration	-
31	0.3486	38231.5	0	?	0	535	Calibration	-
32	0.3595	38183.5	0	?	0	535	Calibration	-
33	0.3703	38416	0	?	0	535	Calibration	-
34	0.3812	38217.7	0	?	0	535	Calibration	-
35	0.3921	38085	0	?	0	535	Calibration	-
36	0.403	38214.4	0	?	0	535	Calibration	-
37	0.4139	38263.3	0	?	0	535	Calibration	-
38	0.4248	38154.5	0	?	0	535	Calibration	-
39	0.4357	38162.8	0	?	0	535	Calibration	-
40	0.4466	38076.1	0	?	0	535	Calibration	-
41	0.4575	38100.8	0	?	0	535	Calibration	-
42	0.4684	38193.7	0	?	0	535	Calibration	-
43	0.4793	38299.2	0	?	0	535	Calibration	-
44	0.4902	38137.3	0	?	0	535	Calibration	-
45	0.5011	38092.9	0	?	0	535	Calibration	-
46	0.5119	38116.5	0	?	0	535	Calibration	-
47	0.5228	38219	0	?	0	535	Calibration	-
48	0.5337	38083.7	0	?	0	535	Calibration	-
49	0.5446	38270.2	0	?	0	535	Calibration	-
50	0.5555	38155	0	?	0	535	Calibration	-
51	0.5664	38211.8	0	?	0	535	Calibration	-
52	0.5773	38008.3	0	?	0	535	Calibration	-
53	0.5882	38066.2	0	?	0	535	Calibration	-
54	0.5991	38100.9	0	?	0	535	Calibration	-
55	0.61	38227	0	?	0	535	Calibration	-
56	0.6209	38040.3	0	?	0	535	Calibration	-
57	0.6318	38091.3	0	?	0	535	Calibration	-
58	0.6427	38058.5	0	?	0	535	Calibration	-
59	0.6535	38125.3	0	?	0	535	Calibration	-
60	0.6644	38189.2	0	?	0	535	Calibration	-
61	0.6753	38177.5	0	?	0	535	Calibration	-
62	0.6862	37964.5	0	?	0	535	Calibration	-
63	0.6971	38015.9	0	?	0	535	Calibration	-
64	0.708	38130.5	0	?	0	535	Calibration	-
65	0.7189	37963.6	0	?	0	535	Calibration	-
66	0.7298	38152.3	0	?	0	535	Calibration	-
67	0.7407	38050	0	?	0	535	Calibration	-
68	0.7516	38171.8	0	?	0	535	Calibration	-
69	0.7625	38113.5	0	?	0	535	Calibration	-
70	0.7734	38076.4	0	?	0	535	Calibration	-
71	0.7843	38082.7	0	?	0	535	Calibration	-
72	0.7951	38072.4	0	?	0	535	Calibration	-
73	0.806	37877.9	0	?	0	535	Calibration	-
74	0.8169	38007.3	0	?	0	535	Calibration	-
75	0.8278	38093.5	0	?	0	535	Calibration	-
76	0.8387	38060.8	0	?	0	535	Calibration	-
77	0.8496	38065	0	?	0	535	Calibration	-
78	0.8605	38060.5	0	?	0	535	Calibration	-
79	0.8714	37966.7	0	?	0	535	Calibration	-
80	0.8823	37898.4	0	?	0	535	Calibration	-
81	0.8932	37897.5	0	?	0	535	Calibration	-
82	0.9041	37897.4	0	?	0	535	Calibration	-
83	0.915	38118.3	0	?	0	535	Calibration	-
84	0.9259	37970.5	0	?	0	535	Calibration	-
85	0.9368	38031.1	0	?	0	535	Calibration	-
86	0.9476	37916	0	?	0	535	Calibration	-
87	0.9585	37875.4	0	?	0	535	Calibration	-
88	0.9694	38130.9	0	?	0	535	Calibration	-
89	0.9803	37985.5	0	?	0	535	Calibration	-
90	0.9912	37990.6	0	?	0	535	Calibration	-
91	1.0021	38136.8	0	?	0	535	Calibration	-
92	1.013	38027.5	0	?	0	535	Calibration	-
93	1.0239	37974.8	0	?	0	535	Calibration	-
94	1.0348	37925.5	0	?	0	535	Calibration	-
95	1.0457	38088.1	0	?	0	535	Calibration	-
96	1.0566	38093.9	0	?	0	535	Calibration	-
97	1.0675	38029.2	0	?	0	535	Calibration	-
98	1.0784	37965	0	?	0	535	Calibration	-
99	1.0892	38091	0	?	0	535	Calibration	-
100	1.1001	38199.1	0	?	0	535	Calibration	-
101	1.111	38070.4	0	?	0	535	Calibration	-
102	1.1219	37961.5	0	?	0	535	Calibration	-
103	1.1328	38130.2	0	?	0	535	Calibration	-
104	1.1437	38076.6	0	?	0	535	Calibration	-
105	1.1546	37965.1	0	?	0	535	Calibration	-
106	1.1655	37952.8	0	?	0	535	Calibration	-
107	1.1764	38030.2	0	?	0	535	Calibration	-
108	1.1873	37991.9	0	?	0	535	Calibration	-
109	1.1982	37976	0	?	0	535	Calibration	-
110	1.2091	37995.8	0	?	0	535	Calibration	-
111	1.22	38008.2	0	?	0	535	Calibration	-
112	1.2308	38027.5	0	?	0	535	Calibration	-
113	1.2417	37952.3	0	?	0	535	Calibration	-
114	1.2526	38005	0	?	0	535	Calibration	-
115	1.2635	38048.8	0	?	0	535	Calibration	-
116	1.2744	37980.8	0	?	0	535	Calibration	-
117	1.2853	37966.3	0	?	0	535	Calibration	-
118	1.2962	37912.9	0	?	0	535	Calibration	-
119	1.3071	37958.3	0	?	0	535	Calibration	-
120	1.318	38036.6	0	?	0	535	Calibration	-
121	1.3289	38061.8	0	?	0	535	Calibration	-
122	1.3398	38048	0	?	0	535	Calibration	-
123	1.3507	37978.9	0	?	0	535	Calibration	-
124	1.3616	37961.4	0	?	0	535	Calibration	-
125	1.3724	38066	0	?	0	535	Calibration	-
126	1.3833	38024.2	0	?	0	535	Calibration	-
127	1.3942	38067.1	0	?	0	535	Calibration	-
128	1.4051	37980	0	?	0	535	Calibration	-
129	1.416	37897.9	0	?	0	535	Calibration	-
130	1.4269	37985.5	0	?	0	535	Calibration	-
131	1.4378	37973.9	0	?	0	535	Calibration	-
132	1.4487	38004.2	0	?	0	535	Calibration	-
133	1.4596	37907.8	0	?	0	535	Calibration	-
134	1.4705	38146.2	0	?	0	535	Calibration	-
135	1.4814	38090.3	0	?	0	535	Calibration	-
136	1.4923	37979.6	0	?	0	535	Calibration	-
137	1.5032	37817.2	0	?	0	535	Calibration	-
138	1.5141	37990.1	0	?	0	535	Calibration	-
139	1.5249	37880.2	0	?	0	535	Calibration	-
140	1.5358	37887.6	0	?	0	535	Calibration	-
141	1.5467	38080.2	0	?	0	535	Calibration	-
142	1.5576	37960.7	0	?	0	535	Calibration	-
143	1.5685	37926.6	0	?	0	535	Calibration	-
144	1.5794	37933.8	0	?	0	535	Calibration	-
145	1.5903	37889	0	?	0	535	Calibration	-
146	1.6012	37965.6	0	?	0	535	Calibration	-
147	1.6121	37912.8	0	?	0	535	Calibration	-
148	1.623	38015.2	0	?	0	535	Calibration	-
149	1.6339	37968.6	0	?	0	535	Calibration	-
150	1.6448	37864.4	0	?	0	535	Calibration	-
151	1.6557	38006.2	0	?	0	535	Calibration	-
152	1.6665	37906.9	0	?	0	535	Calibration	-
153	1.6774	38063.2	0	?	0	535	Calibration	-
154	1.6883	38086.2	0	?	0	535	Calibration	-
155	1.6992	38034.2	0	?	0	535	Calibration	-
156	1.7101	37881.6	0	?	0	535	Calibration	-
157	1.721	38012.6	0	?	0	535	Calibration	-
158	1.7319	37946	0	?	0	535	Calibration	-
159	1.7428	38037.2	0	?	0	535	Calibration	-
160	1.7537	38106.8	0	?	0	535	Calibration	-
161	1.7646	37952.9	0	?	0	535	Calibration	-
162	1.7755	37952.2	0	?	0	535	Calibration	-
163	1.7864	37976.7	0	?	0	535	Calibration	-
164	1.7973	37908.2	0	?	0	535	Calibration	-
165	1.8081	37960.3	0	?	0	535	Calibration	-
166	1.819	37829.5	0	?	0	535	Calibration	-
167	1.8299	38030.2	0	?	0	535	Calibration	-
168	1.8408	37978	0	?	0	535	Calibration	-
169	1.8517	38042.3	0	?	0	535	Calibration	-
170	1.8626	37999	0	?	0	535	Calibration	-
171	1.8735	37940.2	0	?	0	535	Calibration	-
172	1.8844	38029.4	0	?	0	535	Calibration	-
173	1.8953	37973.1	0	?	0	535	Calibration	-
174	1.9062	37900.8	0	?	0	535	Calibration	-
175	1.9171	37828	0	?	0	535	Calibration	-
176	1.928	38022.6	0	?	0	535	Calibration	-
177	1.9389	37822.8	0	?	0	535	Calibration	-
178	1.9498	37843.1	0	?	0	535	Calibration	-
179	1.9606	38081.6	0	?	0	535	Calibration	-
180	1.9715	38037.8	0	?	0	535	Calibration	-
181	1.9824	37958	0	?	0	535	Calibration	-
182	1.9933	37912.8	0	?	0	535	Calibration	-
183	2.0042	37850.2	0	?	0	535	Calibration	-
184	2.0151	37977.1	0	?	0	535	Calibration	-
185	2.026	37995.7	0	?	0	535	Calibration	-
186	2.0369	37982.2	0	?	0	535	Calibration	-
187	2.0478	37960.4	0	?	0	535	Calibration	-
188	2.0587	37935.7	0	?	0	535	Calibration	-
189	2.0696	37848.2	0	?	0	535	Calibration	-
190	2.0805	37945.5	0	?	0	535	Calibration	-
191	2.0914	37939.4	0	?	0	535	Calibration	-
192	2.1022	37870.5	0	?	0	535	Calibration	-
193	2.1131	37932.8	0	?	0	535	Calibration	-
194	2.124	38031.9	0	?	0	535	Calibration	-
195	2.1349	38023.1	0	?	0	535	Calibration	-
196	2.1458	37878.3	0	?	0	535	Calibration	-
197	2.1567	38025.1	0	?	0	535	Calibration	-
198	2.1676	38015.3	0	?	0	535	Calibration	-
199	2.1785	37922.2	0	?	0	535	Calibration	-
200	2.1894	38023.7	0	?	0	535	Calibration	-
201	2.2003	37934.2	0	?	0	535	Calibration	-
202	2.2112	38054.8	0	?	0	535	Calibration	-
203	2.2221	37848	0	?	0	535	Calibration	-
204	2.233	38006.3	0	?	0	535	Calibration	-
205	2.2438	37765	0	?	0	535	Calibration	-
206	2.2547	37963.4	0	?	0	535	Calibration	-
207	2.2656	38017	0	?	0	535	Calibration	-
208	2.2765	37960	0	?	0	535	Calibration	-
209	2.2874	38066.6	0	?	0	535	Calibration	-
210	2.2983	38102.5	0	?	0	535	Calibration	-
211	2.3092	37907.4	0	?	0	535	Calibration	-
212	2.3201	38026	0	?	0	535	Calibration	-
213	2.331	38009.4	0	?	0	535	Calibration	-
214	2.3419	37946.5	0	?	0	535	Calibration	-
215	2.3528	38103	0	?	0	535	Calibration	-
216	2.3637	37819	0	?	0	535	Calibration	-
217	2.3746	37913.8	0	?	0	535	Calibration	-
218	2.3854	37958.7	0	?	0	535	Calibration	-
219	2.3963	38047.5	0	?	0	535	Calibration	-
220	2.4072	38009.9	0	?	0	535	Calibration	-
221	2.4181	37826.6	0	?	0	535	Calibration	-
222	2.429	37926.7	0	?	0	535	Calibration	-
223	2.4399	37981.3	0	?	0	535	Calibration	-
224	2.4508	37993.4	0	?	0	535	Calibration	-
225	2.4617	37859.3	0	?	0	535	Calibration	-
226	2.4726	37970.7	0	?	0	535	Calibration	-
227	2.4835	37879.8	0	?	0	535	Calibration	-
228	2.4944	37947.3	0	?	0	535	Calibration	-
229	2.5053	37934.3	0	?	0	535	Calibration	-
230	2.5162	38033.5	0	?	0	535	Calibration	-
231	2.5271	37930.6	0	?	0	535	Calibration	-
232	2.5379	37919.4	0	?	0	535	Calibration	-
233	2.5488	37960.5	0	?	0	535	Calibration	-
234	2.5597	38058.8	0	?	0	535	Calibration	-
235	2.5706	37975.5	0	?	0	535	Calibration	-
236	2.5815	37984.5	0	?	0	535	Calibration	-
237	2.5924	37907.8	0	?	0	535	Calibration	-
238	2.6033	38035.3	0	?	0	535	Calibration	-
239	2.6142	38019	0	?	0	535	Calibration	-
240	2.6251	37975.6	0	?	0	535	Calibration	-
241	2.636	37962.6	0	?	0	535	Calibration	-
242	2.6469	38002.1	0	?	0	535	Calibration	-
243	2.6578	38030.3	0	?	0	535	Calibration	-
244	2.6687	37896.3	0	?	0	535	Calibration	-
245	2.6795	37838	0	?	0	535	Calibration	-
246	2.6904	37995	0	?	0	535	Calibration	-
247	2.7013	37905	0	?	0	535	Calibration	-
248	2.7122	38105.8	0	?	0	535	Calibration	-
249	2.7231	37812	0	?	0	535	Calibration	-
250	2.734	37944.7	0	?	0	535	Calibration	-
251	2.7449	37856.9	0	?	0	535	Calibration	-
252	2.7558	37928.2	0	?	0	535	Calibration	-
253	2.7667	37985.8	0	?	0	535	Calibration	-
254	2.7776	38044.4	0	?	0	535	Calibration	-
255	2.7885	37909	0	?	0	535	Calibration	-
256	2.7994	37887	0	?	0	535	Calibration	-
257	2.8103	37969.4	0	?	0	535	Calibration	-
258	2.8211	38045.5	0	?	0	535	Calibration	-
259	2.832	37844.8	0	?	0	535	Calibration	-
260	2.8429	37945.8	0	?	0	535	Calibration	-
261	2.8538	37877.5	0	?	0	535	Calibration	-
262	2.8647	37909.8	0	?	0	535	Calibration	-
263	2.8756	37915.4	0	?	0	535	Calibration	-
264	2.8865	37935.5	0	?	0	535	Calibration	-
265	2.8974	38071.3	0	?	0	535	Calibration	-
266	2.9083	38043.3	0	?	0	535	Calibration	-
267	2.9192	38083	0	?	0	535	Calibration	-
268	2.9301	37979.5	0	?	0	535	Calibration	-
269	2.941	37954.7	0	?	0	535	Calibration	-
270	2.9519	37406	0	?	0	535	Calibration	-
271	2.9627	36281	0	?	0	535	Calibration	-
272	2.9736	37220.3	0	?	0	535	Calibration	-
273	2.9845	37986	0	?	0	535	Calibration	-
274	2.9954	37911.2	0	?	0	535	Calibration	-
275	3.0063	37926.2	0	?	0	535	Calibration	-
276	3.0172	37728.2	0	?	0	535	Calibration	-
277	3.0281	37923.4	0	?	0	535	Calibration	-
278	3.039	37857.3	0	?	0	535	Calibration	-
279	3.0499	37774.2	0	?	0	535	Calibration	-
280	3.0608	37751.2	0	?	0	535	Calibration	-
281	3.0717	37827.6	0	?	0	535	Calibration	-
282	3.0826	37910.8	0	?	0	535	Calibration	-
283	3.0935	37805.8	0	?	0	535	Calibration	-
284	3.1044	37727.5	0	?	0	535	Calibration	-
285	3.1152	37832.6	0	?	0	535	Calibration	-
286	3.1261	37782.1	0	?	0	535	Calibration	-
287	3.137	37786.6	0	?	0	535	Calibration	-
288	3.1479	37836.7	0	?	0	535	Calibration	-
289	3.1588	37748.4	0	?	0	535	Calibration	-
290	3.1697	37758.8	0	?	0	535	Calibration	-
291	3.1806	37737.6	0	?	0	535	Calibration	-
292	3.1915	37794.7	0	?	0	535	Calibration	-
293	3.2024	37700	0	?	0	535	Calibration	-
294	3.2133	37699.5	0	?	0	535	Calibration	-
295	3.2242	37842	0	?	0	535	Calibration	-
296	3.2351	37886.2	0	?	0	535	Calibration	-
297	3.246	37702.9	0	?	0	535	Calibration	-
298	3.2568	37674.6	0	?	0	535	Calibration	-
299	3.2677	37725.8	0	?	0	535	Calibration	-
300	3.2786	37814.9	0	?	0	535	Calibration	-
301	3.2895	37823	0	?	0	535	Calibration	-
302	3.3004	37771.9	0	?	0	535	Calibration	-
303	3.3113	37795.4	0	?	0	535	Calibration	-
304	3.3222	37885	0	?	0	535	Calibration	-
305	3.3331	37755.9	0	?	0	535	Calibration	-
306	3.344	37785.3	0	?	0	535	Calibration	-
307	3.3549	37845.8	0	?	0	535	Calibration	-
308	3.3658	37725.2	0	?	0	535	Calibration	-
309	3.3767	37758.4	0	?	0	535	Calibration	-
310	3.3876	37818.8	0	?	0	535	Calibration	-
311	3.3984	37856.3	0	?	0	535	Calibration	-
312	3.4093	37763.3	0	?	0	535	Calibration	-
313	3.4202	37830.3	0	?	0	535	Calibration	-
314	3.4311	37859.4	0	?	0	535	Calibration	-
315	3.442	37767.9	0	?	0	535	Calibration	-
316	3.4529	37843.6	0	?	0	535	Calibration	-
317	3.4638	37726.6	0	?	0	535	Calibration	-
318	3.4747	37799.9	0	?	0	535	Calibration	-
319	3.4856	37864.9	0	?	0	535	Calibration	-
320	3.4965	37871.8	0	?	0	535	Calibration	-
321	3.5074	37757.3	0	?	0	535	Calibration	-
322	3.5183	37754	0	?	0	535	Calibration	-
323	3.5292	37931.7	0	?	0	535	Calibration	-
324	3.54	37822.3	0	?	0	535	Calibration	-
325	3.5509	37812.3	0	?	0	535	Calibration	-
326	3.5618	38066.4	0	?	0	535	Calibration	-
327	3.5727	37796.5	0	?	0	535	Calibration	-
328	3.5836	37767.8	0	?	0	535	Calibration	-
329	3.5945	38024.8	0	?	0	535	Calibration	-
330	3.6054	37994.3	0	?	0	535	Calibration	-
331	3.6163	37921.1	0	?	0	535	Calibration	-
332	3.6272	37912.5	0	?	0	535	Calibration	-
333	3.6381	37841	0	?	0	535	Calibration	-
334	3.649	37956	0	?	0	535	Calibration	-
335	3.6599	37778.5	0	?	0	535	Calibration	-
336	3.6708	37893.3	0	?	0	535	Calibration	-
337	3.6817	37831.4	0	?	0	535	Calibration	-
338	3.6925	37926.9	0	?	0	535	Calibration	-
339	3.7034	37884.5	0	?	0	535	Calibration	-
340	3.7143	37820.5	0	?	0	535	Calibration	-
341	3.7252	37823.9	0	?	0	535	Calibration	-
342	3.7361	37902.2	0	?	0	535	Calibration	-
343	3.747	37976.4	0	?	0	535	Calibration	-
344	3.7579	37895.2	0	?	0	535	Calibration	-
345	3.7688	37700.5	0	?	0	535	Calibration	-
346	3.7797	37845.3	0	?	0	535	Calibration	-
347	3.7906	37675.8	0	?	0	535	Calibration	-
348	3.8015	37860.7	0	?	0	535	Calibration	-
349	3.8124	37918	0	?	0	535	Calibration	-
350	3.8233	37861.1	0	?	0	535	Calibration	-
351	3.8341	37855.2	0	?	0	535	Calibration	-
352	3.845	37940.1	0	?	0	535	Calibration	-
353	3.8559	37763	0	?	0	535	Calibration	-
354	3.8668	37796.7	0	?	0	535	Calibration	-
355	3.8777	37893.1	0	?	0	535	Calibration	-
356	3.8886	37897.3	0	?	0	535	Calibration	-
357	3.8995	37895.8	0	?	0	535	Calibration	-
358	3.9104	37881.8	0	?	0	535	Calibration	-
359	3.9213	37939	0	?	0	535	Calibration	-
360	3.9322	37945.2	0	?	0	535	Calibration	-
361	3.9431	37871.8	0	?	0	535	Calibration	-
362	3.954	37913	0	?	0	535	Calibration	-
363	3.9649	37757.2	0	?	0	535	Calibration	-
364	3.9757	37795.4	0	?	0	535	Calibration	-
365	3.9866	37918	0	?	0	535	Calibration	-
366	3.9975	37933.2	0	?	0	535	Calibration	-
367	4.0084	37811.9	0	?	0	535	Calibration	-
368	4.0193	37954.4	0	?	0	535	Calibration	-
369	4.0302	37870.8	0	?	0	535	Calibration	-
370	4.0411	37767.3	0	?	0	535	Calibration	-
371	4.052	37831.5	0	?	0	535	Calibration	-
372	4.0629	37827.9	0	?	0	535	Calibration	-
373	4.0738	37739.8	0	?	0	535	Calibration	-
374	4.0847	37760.6	0	?	0	535	Calibration	-
375	4.0956	37859.6	0	?	0	535	Calibration	-
376	4.1065	37818.5	0	?	0	535	Calibration	-
377	4.1174	37744.2	0	?	0	535	Calibration	-
378	4.1282	37925.3	0	?	0	535	Calibration	-
379	4.1391	37866.6	0	?	0	535	Calibration	-
380	4.15	37708	0	?	0	535	Calibration	-
381	4.1609	37884.8	0	?	0	535	Calibration	-
382	4.1718	37870.8	0	?	0	535	Calibration	-
383	4.1827	37917.1	0	?	0	535	Calibration	-
384	4.1936	37768.8	0	?	0	535	Calibration	-
385	4.2045	38014.7	0	?	0	535	Calibration	-
386	4.2154	37824.8	0	?	0	535	Calibration	-
387	4.2263	37944.1	0	?	0	535	Calibration	-
388	4.2372	37990.8	0	?	0	535	Calibration	-
389	4.2481	37912.9	0	?	0	535	Calibration	-
390	4.259	37895	0	?	0	535	Calibration	-
391	4.2698	37851.3	0	?	0	535	Calibration	-
392	4.2807	37954.6	0	?	0	535	Calibration	-
393	4.2916	37918.5	0	?	0	535	Calibration	-
394	4.3025	37806.2	0	?	0	535	Calibration	-
395	4.3134	37996.5	0	?	0	535	Calibration	-
396	4.3243	37957.1	0	?	0	535	Calibration	-
397	4.3352	37949.7	0	?	0	535	Calibration	-
398	4.3461	37894.7	0	?	0	535	Calibration	-
399	4.357	37785.8	0	?	0	535	Calibration	-
400	4.3679	38027.5	0	?	0	535	Calibration	-
401	4.3788	37923	0	?	0	535	Calibration	-
402	4.3897	37756	0	?	0	535	Calibration	-
403	4.4006	37778.8	0	?	0	535	Calibration	-
404	4.4114	37813.2	0	?	0	535	Calibration	-
405	4.4223	37896.8	0	?	0	535	Calibration	-
406	4.4332	37889.5	0	?	0	535	Calibration	-
407	4.4441	37813	0	?	0	535	Calibration	-
408	4.455	37802.5	0	?	0	535	Calibration	-
409	4.4659	37848.3	0	?	0	535	Calibration	-
410	4.4768	37786.2	0	?	0	535	Calibration	-
411	4.4877	37862	0	?	0	535	Calibration	-
412	4.4986	37902.9	0	?	0	535	Calibration	-
413	4.5095	37868	0	?	0	535	Calibration	-
414	4.5204	37742.9	0	?	0	535	Calibration	-
415	4.5313	37875.2	0	?	0	535	Calibration	-
416	4.5422	37865.5	0	?	0	535	Calibration	-
417	4.553	37992.6	0	?	0	535	Calibration	-
418	4.5639	37735.8	0	?	0	535	Calibration	-
419	4.5748	37677	0	?	0	535	Calibration	-
420	4.5857	37718	0	?	0	535	Calibration	-
421	4.5966	37806.6	0	?	0	535	Calibration	-
422	4.6075	37841.3	0	?	0	535	Calibration	-
423	4.6184	37998.2	0	?	0	535	Calibration	-
424	4.6293	38062	0	?	0	535	Calibration	-
425	4.6402	37859.9	0	?	0	535	Calibration	-
426	4.6511	37547.1	0	?	0	535	Calibration	-
427	4.662	37681.8	0	?	0	535	Calibration	-
428	4.6729	37947	0	?	0	535	Calibration	-
429	4.6838	37880.5	0	?	0	535	Calibration	-
430	4.6947	37691.6	0	?	0	535	Calibration	-
431	4.7055	37797.6	0	?	0	535	Calibration	-
432	4.7164	37872.2	0	?	0	535	Calibration	-
433	4.7273	37900.9	0	?	0	535	Calibration	-
434	4.7382	37915.5	0	?	0	535	Calibration	-
435	4.7491	37833.2	0	?	0	535	Calibration	-
436	4.76	37826.9	0	?	0	535	Calibration	-
437	4.7709	37915.1	0	?	0	535	Calibration	-
438	4.7818	37819	0	?	0	535	Calibration	-
439	4.7927	37806.2	0	?	0	535	Calibration	-
440	4.8036	37784.5	0	?	0	535	Calibration	-
441	4.8145	37844.4	0	?	0	535	Calibration	-
442	4.8254	37865.8	0	?	0	535	Calibration	-
443	4.8363	37787.7	0	?	0	535	Calibration	-
444	4.8471	37824.8	0	?	0	535	Calibration	-
445	4.858	37909.7	0	?	0	535	Calibration	-
446	4.8689	37909.8	0	?	0	535	Calibration	-
447	4.8798	37713.1	0	?	0	535	Calibration	-
448	4.8907	37801.4	0	?	0	535	Calibration	-
449	4.9016	37752.2	0	?	0	535	Calibration	-
450	4.9125	37798.8	0	?	0	535	Calibration	-
451	4.9234	37953.2	0	?	0	535	Calibration	-
452	4.9343	37831.3	0	?	0	535	Calibration	-
453	4.9452	37754.8	0	?	0	535	Calibration	-
454	4.9561	37736.6	0	?	0	535	Calibration	-
455	4.967	37795.6	0	?	0	535	Calibration	-
456	4.9779	37735.3	0	?	0	535	Calibration	-
457	4.9887	37846.5	0	?	0	535	Calibration	-
458	4.9996	37725.9	0	?	0	535	Calibration	-
459	5.0105	37767.6	0	?	0	535	Calibration	-
460	5.0214	37811	0	?	0	535	Calibration	-
461	5.0323	37817.8	0	?	0	535	Calibration	-
462	5.0432	37884.8	0	?	0	535	Calibration	-
463	5.0541	37836.7	0	?	0	535	Calibration	-
464	5.065	37760.9	0	?	0	535	Calibration	-
465	5.0759	37783	0	?	0	535	Calibration	-
466	5.0868	37771	0	?	0	535	Calibration	-
467	5.0977	37899	0	?	0	535	Calibration	-
468	5.1086	37732.9	0	?	0	535	Calibration	-
469	5.1195	37798.6	0	?	0	535	Calibration	-
470	5.1303	37828.3	0	?	0	535	Calibration	-
471	5.1412	37891.7	0	?	0	535	Calibration	-
472	5.1521	37795.8	0	?	0	535	Calibration	-
473	5.163	37811.5	0	?	0	535	Calibration	-
474	5.1739	37656.7	0	?	0	535	Calibration	-
475	5.1848	37868.4	0	?	0	535	Calibration	-
476	5.1957	37803	0	?	0	535	Calibration	-
477	5.2066	37868.1	0	?	0	535	Calibration	-
478	5.2175	37774.4	0	?	0	535	Calibration	-
479	5.2284	37829.8	0	?	0	535	Calibration	-
480	5.2393	37903.5	0	?	0	535	Calibration	-
481	5.2502	37806.2	0	?	0	535	Calibration	-
482	5.2611	37952.7	0	?	0	535	Calibration	-
483	5.272	37751.4	0	?	0	535	Calibration	-
484	5.2828	37767.3	0	?	0	535	Calibration	-
485	5.2937	37792.1	0	?	0	535	Calibration	-
486	5.3046	37905.2	0	?	0	535	Calibration	-
487	5.3155	37835.2	0	?	0	535	Calibration	-
488	5.3264	37755.2	0	?	0	535	Calibration	-
489	5.3373	37637.3	0	?	0	535	Calibration	-
490	5.3482	37790.8	0	?	0	535	Calibration	-
491	5.3591	37815.2	0	?	0	535	Calibration	-
492	5.37	37715.4	0	?	0	535	Calibration	-
493	5.3809	37796.2	0	?	0	535	Calibration	-
494	5.3918	37915	0	?	0	535	Calibration	-
495	5.4027	37730.2	0	?	0	535	Calibration	-
496	5.4136	37803.7	0	?	0	535	Calibration	-
497	5.4244	37789.3	0	?	0	535	Calibration	-
498	5.4353	37774.7	0	?	0	535	Calibration	-
499	5.4462	37827.2	0	?	0	535	Calibration	-
500	5.4571	37703.3	0	?	0	535	Calibration	-
501	5.468	37892	0	?	0	535	Calibration	-
502	5.4789	37749.2	0	?	0	535	Calibration	-
503	5.4898	37859.4	0	?	0	535	Calibration	-
504	5.5007	37621.1	0	?	0	535	Calibration	-
505	5.5116	37717.9	0	?	0	535	Calibration	-
506	5.5225	37805.8	0	?	0	535	Calibration	-
507	5.5334	37733.2	0	?	0	535	Calibration	-
508	5.5443	37912.3	0	?	0	535	Calibration	-
509	5.5552	37922.1	0	?	0	535	Calibration	-
510	5.566	37726	0	?	0	535	Calibration	-
511	5.5769	37843.3	0	?	0	535	Calibration	-
512	5.5878	37658.3	0	?	0	535	Calibration	-
513	5.5987	37734.3	0	?	0	535	Calibration	-
514	5.6096	37799.2	0	?	0	535	Calibration	-
515	5.6205	37701.3	0	?	0	535	Calibration	-
516	5.6314	37681.5	0	?	0	535	Calibration	-
517	5.6423	37774.2	0	?	0	535	Calibration	-
518	5.6532	37662.3	0	?	0	535	Calibration	-
519	5.6641	37764.2	0	?	0	535	Calibration	-
520	5.675	37822	0	?	0	535	Calibration	-
521	5.6859	37745	0	?	0	535	Calibration	-
522	5.6968	37706	0	?	0	535	Calibration	-
523	5.7076	37700.7	0	?	0	535	Calibration	-
524	5.7185	37878.9	0	?	0	535	Calibration	-
525	5.7294	37763.1	0	?	0	535	Calibration	-
526	5.7403	37880.3	0	?	0	535	Calibration	-
527	5.7512	37784.3	0	?	0	535	Calibration	-
528	5.7621	37886.5	0	?	0	535	Calibration	-
529	5.773	37794.6	0	?	0	535	Calibration	-
530	5.7839	37886	0	?	0	535	Calibration	-
531	5.7948	37593	0	?	0	535	Calibration	-
532	5.8057	37817.1	0	?	0	535	Calibration	-
533	5.8166	37728.5	0	?	0	535	Calibration	-
534	5.8275	37834.4	0	?	0	535	Calibration	-
535	5.8384	37838.8	0	?	0	535	Calibration	-
536	5.8493	37855.2	0	?	0	535	Calibration	-
537	5.8601	37897.2	0	?	0	535	Calibration	-
538	5.871	37821.5	0	?	0	535	Calibration	-
539	5.8819	37831.4	0	?	0	535	Calibration	-
540	5.8928	37755.8	0	?	0	535	Calibration	-
541	5.9037	37802.9	0	?	0	535	Calibration	-
542	5.9146	37755.2	0	?	0	535	Calibration	-
543	5.9255	37721	0	?	0	535	Calibration	-
544	5.9364	37870.6	0	?	0	535	Calibration	-
545	5.9473	37794	0	?	0	535	Calibration	-
546	5.9582	37821.2	0	?	0	535	Calibration	-
547	5.9691	37774.4	0	?	0	535	Calibration	-
548	5.98	37772.4	0	?	0	535	Calibration	-
549	5.9909	37954.3	0	?	0	535	Calibration	-
550	6.0017	37647.4	0	?	0	535	Calibration	-
551	6.0126	37747.3	0	?	0	535	Calibration	-
552	6.0235	37702.5	0	?	0	535	Calibration	-
553	6.0344	37843	0	?	0	535	Calibration	-
554	6.0453	37713.7	0	?	0	535	Calibration	-
555	6.0562	37694.9	0	?	0	535	Calibration	-
556	6.0671	37855.5	0	?	0	535	Calibration	-
557	6.078	37560.2	0	?	0	535	Calibration	-
558	6.0889	37793.6	0	?	0	535	Calibration	-
559	6.0998	37824.2	0	?	0	535	Calibration	-
560	6.1107	37751.7	0	?	0	535	Calibration	-
561	6.1216	37801.6	0	?	0	535	Calibration	-
562	6.1325	37726.5	0	?	0	535	Calibration	-
563	6.1433	37764.5	0	?	0	535	Calibration	-
564	6.1542	37834.8	0	?	0	535	Calibration	-
565	6.1651	37744.9	0	?	0	535	Calibration	-
566	6.176	37787.7	0	?	0	535	Calibration	-
567	6.1869	37732.2	0	?	0	535	Calibration	-
568	6.1978	37731.3	0	?	0	535	Calibration	-
569	6.2087	37695.5	0	?	0	535	Calibration	-
570	6.2196	37730.4	0	?	0	535	Calibration	-
571	6.2305	37749.8	0	?	0	535	Calibration	-
572	6.2414	37841.9	0	?	0	535	Calibration	-
573	6.2523	37867.3	0	?	0	535	Calibration	-
574	6.2632	38007.9	0	?	0	535	Calibration	-
575	6.2741	37738.7	0	?	0	535	Calibration	-
576	6.2849	37681	0	?	0	535	Calibration	-
577	6.2958	37719.1	0	?	0	535	Calibration	-
578	6.3067	37808.5	0	?	0	535	Calibration	-
579	6.3176	37760.2	0	?	0	535	Calibration	-
580	6.3285	37814.6	0	?	0	535	Calibration	-
581	6.3394	37844	0	?	0	535	Calibration	-
582	6.3503	37643.2	0	?	0	535	Calibration	-
583	6.3612	37769	0	?	0	535	Calibration	-
584	6.3721	37642	0	?	0	535	Calibration	-
585	6.383	37682	0	?	0	535	Calibration	-
586	6.3939	37725.7	0	?	0	535	Calibration	-
587	6.4048	37543.3	0	?	0	535	Calibration	-
588	6.4157	37775	0	?	0	535	Calibration	-
589	6.4266	37821.2	0	?	0	535	Calibration	-
590	6.4374	37670	0	?	0	535	Calibration	-
591	6.4483	37648.8	0	?	0	535	Calibration	-
592	6.4592	37708.3	0	?	0	535	Calibration	-
593	6.4701	37703	0	?	0	535	Calibration	-
594	6.481	37709.7	0	?	0	535	Calibration	-
595	6.4919	37912.4	0	?	0	535	Calibration	-
596	6.5028	37693.4	0	?	0	535	Calibration	-
597	6.5137	37780.9	0	?	0	535	Calibration	-
598	6.5246	37602.2	0	?	0	535	Calibration	-
599	6.5355	37722.1	0	?	0	535	Calibration	-
600	6.5464	37604.8	0	?	0	535	Calibration	-
601	6.5573	37779.4	0	?	0	535	Calibration	-
602	6.5682	37782.3	0	?	0	535	Calibration	-
603	6.579	37819.8	0	?	0	535	Calibration	-
604	6.5899	37726.5	0	?	0	535	Calibration	-
605	6.6008	37743.6	0	?	0	535	Calibration	-
606	6.6117	37841.3	0	?	0	535	Calibration	-
607	6.6226	37734.5	0	?	0	535	Calibration	-
608	6.6335	37673.7	0	?	0	535	Calibration	-
609	6.6444	37807.2	0	?	0	535	Calibration	-
610	6.6553	37649	0	?	0	535	Calibration	-
611	6.6662	37707	0	?	0	535	Calibration	-
612	6.6771	37687.4	0	?	0	535	Calibration	-
613	6.688	37652.7	0	?	0	535	Calibration	-
614	6.6989	37659.2	0	?	0	535	Calibration	-
615	6.7098	37662	0	?	0	535	Calibration	-
616	6.7206	37700.7	0	?	0	535	Calibration	-
617	6.7315	37539.4	0	?	0	535	Calibration	-
618	6.7424	37653.3	0	?	0	535	Calibration	-
619	6.7533	37502.9	0	?	0	535	Calibration	-
620	6.7642	37678	0	?	0	535	Calibration	-
621	6.7751	37688.8	0	?	0	535	Calibration	-
622	6.786	37555.4	0	?	0	535	Calibration	-
623	6.7969	37737.7	0	?	0	535	Calibration	-
624	6.8078	37709.4	0	?	0	535	Calibration	-
625	6.8187	37676.9	0	?	0	535	Calibration	-
626	6.8296	37717	0	?	0	535	Calibration	-
627	6.8405	37688.2	0	?	0	535	Calibration	-
628	6.8514	37605.6	0	?	0	535	Calibration	-
629	6.8622	37646.4	0	?	0	535	Calibration	-
630	6.8731	37653.8	0	?	0	535	Calibration	-
631	6.884	37661.9	0	?	0	535	Calibration	-
632	6.8949	37778	0	?	0	535	Calibration	-
633	6.9058	37718.2	0	?	0	535	Calibration	-
634	6.9167	37655.9	0	?	0	535	Calibration	-
635	6.9276	37489.7	0	?	0	535	Calibration	-
636	6.9385	37833.6	0	?	0	535	Calibration	-
637	6.9494	37712.6	0	?	0	535	Calibration	-
638	6.9603	37728.7	0	?	0	535	Calibration	-
639	6.9712	37792.7	0	?	0	535	Calibration	-
640	6.9821	37767.9	0	?	0	535	Calibration	-
641	6.993	37645.8	0	?	0	535	Calibration	-
642	7.0039	37518	0	?	0	535	Calibration	-
643	7.0147	37711.9	0	?	0	535	Calibration	-
644	7.0256	37548.2	0	?	0	535	Calibration	-
645	7.0365	37764.9	0	?	0	535	Calibration	-
646	7.0474	37601	0	?	0	535	Calibration	-
647	7.0583	37763.8	0	?	0	535	Calibration	-
648	7.0692	37719.7	0	?	0	535	Calibration	-
649	7.0801	37648.5	0	?	0	535	Calibration	-
650	7.091	37657.5	0	?	0	535	Calibration	-
651	7.1019	37700.3	0	?	0	535	Calibration	-
652	7.1128	37540.2	0	?	0	535	Calibration	-
653	7.1237	37752.5	0	?	0	535	Calibration	-
654	7.1346	37494.5	0	?	0	535	Calibration	-
655	7.1455	37751.6	0	?	0	535	Calibration	-
656	7.1563	37733	0	?	0	535	Calibration	-
657	7.1672	37674.3	0	?	0	535	Calibration	-
658	7.1781	37856.3	0	?	0	535	Calibration	-
659	7.189	37691.5	0	?	0	535	Calibration	-
660	7.1999	37666.2	0	?	0	535	Calibration	-
661	7.2108	37680.4	0	?	0	535	Calibration	-
662	7.2217	37716.5	0	?	0	535	Calibration	-
663	7.2326	37628	0	?	0	535	Calibration	-
664	7.2435	37578.6	0	?	0	535	Calibration	-
665	7.2544	37574.1	0	?	0	535	Calibration	-
666	7.2653	37669.5	0	?	0	535	Calibration	-
667	7.2762	37641	0	?	0	535	Calibration	-
668	7.2871	37691.8	0	?	0	535	Calibration	-
669	7.2979	37572.8	0	?	0	535	Calibration	-
670	7.3088	37548	0	?	0	535	Calibration	-
671	7.3197	37803.7	0	?	0	535	Calibration	-
672	7.3306	37703.5	0	?	0	535	Calibration	-
673	7.3415	37717.8	0	?	0	535	Calibration	-
674	7.3524	37714	0	?	0	535	Calibration	-
675	7.3633	37605.4	0	?	0	535	Calibration	-
676	7.3742	37597.8	0	?	0	535	Calibration	-
677	7.3851	37603.9	0	?	0	535	Calibration	-
678	7.396	37736.9	0	?	0	535	Calibration	-
679	7.4069	37588.1	0	?	0	535	Calibration	-
680	7.4178	37703.9	0	?	0	535	Calibration	-
681	7.4287	37648.6	0	?	0	535	Calibration	-
682	7.4396	37699.7	0	?	0	535	Calibration	-
683	7.4504	37679.2	0	?	0	535	Calibration	-
684	7.4613	37659.8	0	?	0	535	Calibration	-
685	7.4722	37568.6	0	?	0	535	Calibration	-
686	7.4831	37624	0	?	0	535	Calibration	-
687	7.494	37745.9	0	?	0	535	Calibration	-
688	7.5049	37746	0	?	0	535	Calibration	-
689	7.5158	37564.8	0	?	0	535	Calibration	-
690	7.5267	37743.1	0	?	0	535	Calibration	-
691	7.5376	37629.8	0	?	0	535	Calibration	-
692	7.5485	37554.4	0	?	0	535	Calibration	-
693	7.5594	37699.1	0	?	0	535	Calibration	-
694	7.5703	37566.7	0	?	0	535	Calibration	-
695	7.5812	37694.9	0	?	0	535	Calibration	-
696	7.592	37809	0	?	0	535	Calibration	-
697	7.6029	37658.2	0	?	0	535	Calibration	-
698	7.6138	37648.8	0	?	0	535	Calibration	-
699	7.6247	37677.4	0	?	0	535	Calibration	-
700	7.6356	37591	0	?	0	535	Calibration	-
701	7.6465	37495.8	0	?	0	535	Calibration	-
702	7.6574	37529.4	0	?	0	535	Calibration	-
703	7.6683	37529.2	0	?	0	535	Calibration	-
704	7.6792	37656.3	0	?	0	535	Calibration	-
705	7.6901	37525.7	0	?	0	535	Calibration	-
706	7.701	37675.6	0	?	0	535	Calibration	-
707	7.7119	37589.5	0	?	0	535	Calibration	-
708	7.7228	37749.6	0	?	0	535	Calibration	-
709	7.7336	37772.1	0	?	0	535	Calibration	-
710	7.7445	37581.7	0	?	0	535	Calibration	-
711	7.7554	37613.9	0	?	0	535	Calibration	-
712	7.7663	37559.8	0	?	0	535	Calibration	-
713	7.7772	37389.1	0	?	0	535	Calibration	-
714	7.7881	37657.8	0	?	0	535	Calibration	-
715	7.799	37764.3	0	?	0	535	Calibration	-
716	7.8099	37796.1	0	?	0	535	Calibration	-
717	7.8208	37628.2	0	?	0	535	Calibration	-
718	7.8317	37558.8	0	?	0	535	Calibration	-
719	7.8426	37582.2	0	?	0	535	Calibration	-
720	7.8535	37513.1	0	?	0	535	Calibration	-
721	7.8644	37510.2	0	?	0	535	Calibration	-
722	7.8752	37556.6	0	?	0	535	Calibration	-
723	7.8861	37726.4	0	?	0	535	Calibration	-
724	7.897	37623.7	0	?	0	535	Calibration	-
725	7.9079	37633	0	?	0	535	Calibration	-
726	7.9188	37588.9	0	?	0	535	Calibration	-
727	7.9297	37572.8	0	?	0	535	Calibration	-
728	7.9406	37653.1	0	?	0	535	Calibration	-
729	7.9515	37638.2	0	?	0	535	Calibration	-
730	7.9624	37782.7	0	?	0	535	Calibration	-
731	7.9733	37618.6	0	?	0	535	Calibration	-
732	7.9842	37539	0	?	0	535	Calibration	-
733	7.9951	37498.1	0	?	0	535	Calibration	-
734	8.006	37595.5	0	?	0	535	Calibration	-
735	8.0169	37518.9	0	?	0	535	Calibration	-
736	8.0277	37561	0	?	0	535	Calibration	-
737	8.0386	37401.8	0	?	0	535	Calibration	-
738	8.0495	37553.9	0	?	0	535	Calibration	-
739	8.0604	37671	0	?	0	535	Calibration	-
740	8.0713	37707.9	0	?	0	535	Calibration	-
741	8.0822	37697.6	0	?	0	535	Calibration	-
742	8.0931	37614.2	0	?	0	535	Calibration	-
743	8.104	37650.3	0	?	0	535	Calibration	-
744	8.1149	37640.5	0	?	0	535	Calibration	-
745	8.1258	37511.5	0	?	0	535	Calibration	-
746	8.1367	37707.8	0	?	0	535	Calibration	-
747	8.1476	37533	0	?	0	535	Calibration	-
748	8.1585	37596.6	0	?	0	535	Calibration	-
749	8.1693	37619.9	0	?	0	535	Calibration	-
750	8.1802	37624.6	0	?	0	535	Calibration	-
751	8.1911	37535.6	0	?	0	535	Calibration	-
752	8.202	37531.2	0	?	0	535	Calibration	-
753	8.2129	37589.2	0	?	0	535	Calibration	-
754	8.2238	37589.8	0	?	0	535	Calibration	-
755	8.2347	37638.2	0	?	0	535	Calibration	-
756	8.2456	37700.8	0	?	0	535	Calibration	-
757	8.2565	37554.4	0	?	0	535	Calibration	-
758	8.2674	37647	0	?	0	535	Calibration	-
759	8.2783	37664.1	0	?	0	535	Calibration	-
760	8.2892	37636.2	0	?	0	535	Calibration	-
761	8.3001	37628.3	0	?	0	535	Calibration	-
762	8.3109	37681.5	0	?	0	535	Calibration	-
763	8.3218	37644.6	0	?	0	535	Calibration	-
764	8.3327	37524.2	0	?	0	535	Calibration	-
765	8.3436	37601.7	0	?	0	535	Calibration	-
766	8.3545	37682.3	0	?	0	535	Calibration	-
767	8.3654	37759.6	0	?	0	535	Calibration	-
768	8.3763	37548.5	0	?	0	535	Calibration	-
769	8.3872	37472.2	0	?	0	535	Calibration	-
770	8.3981	37620.2	0	?	0	535	Calibration	-
771	8.409	37669.7	0	?	0	535	Calibration	-
772	8.4199	37684.4	0	?	0	535	Calibration	-
773	8.4308	37631.8	0	?	0	535	Calibration	-
774	8.4417	37492.6	0	?	0	535	Calibration	-
775	8.4525	37610.1	0	?	0	535	Calibration	-
776	8.4634	37628.5	0	?	0	535	Calibration	-
777	8.4743	37567.9	0	?	0	535	Calibration	-
778	8.4852	37652.7	0	?	0	535	Calibration	-
779	8.4961	37553.2	0	?	0	535	Calibration	-
780	8.507	37531.8	0	?	0	535	Calibration	-
781	8.5179	37537.9	0	?	0	535	Calibration	-
782	8.5288	37584	0	?	0	535	Calibration	-
783	8.5397	37565	0	?	0	535	Calibration	-
784	8.5506	37618.2	0	?	0	535	Calibration	-
785	8.5615	37780.4	0	?	0	535	Calibration	-
786	8.5724	37588.5	0	?	0	535	Calibration	-
787	8.5833	37682.2	0	?	0	535	Calibration	-
788	8.5942	37597.8	0	?	0	535	Calibration	-
789	8.605	37532.8	0	?	0	535	Calibration	-
790	8.6159	37469.5	0	?	0	535	Calibration	-
791	8.6268	37690.6	0	?	0	535	Calibration	-
792	8.6377	37687.7	0	?	0	535	Calibration	-
793	8.6486	37676	0	?	0	535	Calibration	-
794	8.6595	37736.5	0	?	0	535	Calibration	-
795	8.6704	37488.7	0	?	0	535	Calibration	-
796	8.6813	37596.8	0	?	0	535	Calibration	-
797	8.6922	37645.5	0	?	0	535	Calibration	-
798	8.7031	37439.5	0	?	0	535	Calibration	-
799	8.714	37487.5	0	?	0	535	Calibration	-
800	8.7249	37465.6	0	?	0	535	Calibration	-
801	8.7358	37565.2	0	?	0	535	Calibration	-
802	8.7466	37648.4	0	?	0	535	Calibration	-
803	8.7575	37585.6	0	?	0	535	Calibration	-
804	8.7684	37569.2	0	?	0	535	Calibration	-
805	8.7793	37550.2	0	?	0	535	Calibration	-
806	8.7902	37581.6	0	?	0	535	Calibration	-
807	8.8011	37725	0	?	0	535	Calibration	-
808	8.812	37654.9	0	?	0	535	Calibration	-
809	8.8229	37655.8	0	?	0	535	Calibration	-
810	8.8338	37530.8	0	?	0	535	Calibration	-
811	8.8447	37587.3	0	?	0	535	Calibration	-
812	8.8556	37526.5	0	?	0	535	Calibration	-
813	8.8665	37523	0	?	0	535	Calibration	-
814	8.8774	37576	0	?	0	535	Calibration	-
815	8.8882	37568.4	0	?	0	535	Calibration	-
816	8.8991	37519.8	0	?	0	535	Calibration	-
817	8.91	37516.1	0	?	0	535	Calibration	-
818	8.9209	37584.1	0	?	0	535	Calibration	-
819	8.9318	37506.4	0	?	0	535	Calibration	-
820	8.9427	37668.7	0	?	0	535	Calibration	-
821	8.9536	37565.8	0	?	0	535	Calibration	-
822	8.9645	37486.5	0	?	0	535	Calibration	-
823	8.9754	37560.7	0	?	0	535	Calibration	-
824	8.9863	37565.3	0	?	0	535	Calibration	-
825	8.9972	37476.3	0	?	0	535	Calibration	-
826	9.0081	37554.8	0	?	0	535	Calibration	-
827	9.019	37622	0	?	0	535	Calibration	-
828	9.0298	37691.5	0	?	0	535	Calibration	-
829	9.0407	37586.9	0	?	0	535	Calibration	-
830	9.0516	37666.5	0	?	0	535	Calibration	-
831	9.0625	37544.8	0	?	0	535	Calibration	-
832	9.0734	37570.5	0	?	0	535	Calibration	-
833	9.0843	37538.8	0	?	0	535	Calibration	-
834	9.0952	37470.1	0	?	0	535	Calibration	-
835	9.1061	37503.5	0	?	0	535	Calibration	-
836	9.117	37452.8	0	?	0	535	Calibration	-
837	9.1279	37453.3	0	?	0	535	Calibration	-
838	9.1388	37562.2	0	?	0	535	Calibration	-
839	9.1497	37490.5	0	?	0	535	Calibration	-
840	9.1606	37447.6	0	?	0	535	Calibration	-
841	9.1715	37491.1	0	?	0	535	Calibration	-
842	9.1823	37437.3	0	?	0	535	Calibration	-
843	9.1932	37600.4	0	?	0	535	Calibration	-
844	9.2041	37621.8	0	?	0	535	Calibration	-
845	9.215	37391.8	0	?	0	535	Calibration	-
846	9.2259	37656.6	0	?	0	535	Calibration	-
847	9.2368	37569.9	0	?	0	535	Calibration	-
848	9.2477	37590.6	0	?	0	535	Calibration	-
849	9.2586	37452.8	0	?	0	535	Calibration	-
850	9.2695	37496.9	0	?	0	535	Calibration	-
851	9.2804	37433.8	0	?	0	535	Calibration	-
852	9.2913	37472.1	0	?	0	535	Calibration	-
853	9.3022	37409.6	0	?	0	535	Calibration	-
854	9.3131	37554.9	0	?	0	535	Calibration	-
855	9.3239	37588.4	0	?	0	535	Calibration	-
856	9.3348	37539.8	0	?	0	535	Calibration	-
857	9.3457	37615.8	0	?	0	535	Calibration	-
858	9.3566	37617.5	0	?	0	535	Calibration	-
859	9.3675	37489.8	0	?	0	535	Calibration	-
860	9.3784	37429.5	0	?	0	535	Calibration	-
861	9.3893	37462.5	0	?	0	535	Calibration	-
862	9.4002	37528.3	0	?	0	535	Calibration	-
863	9.4111	37547	0	?	0	535	Calibration	-
864	9.422	37456.4	0	?	0	535	Calibration	-
865	9.4329	37537.6	0	?	0	535	Calibration	-
866	9.4438	37440.6	0	?	0	535	Calibration	-
867	9.4547	37572.7	0	?	0	535	Calibration	-
868	9.4655	37544.6	0	?	0	535	Calibration	-
869	9.4764	37352.5	0	?	0	535	Calibration	-
870	9.4873	37429.7	0	?	0	535	Calibration	-
871	9.4982	37350.5	0	?	0	535	Calibration	-
872	9.5091	37567.5	0	?	0	535	Calibration	-
873	9.52	37489	0	?	0	535	Calibration	-
874	9.5309	37443.2	0	?	0	535	Calibration	-
875	9.5418	37513.2	0	?	0	535	Calibration	-
876	9.5527	37568.6	0	?	0	535	Calibration	-
877	9.5636	37461	0	?	0	535	Calibration	-
878	9.5745	37539.6	0	?	0	535	Calibration	-
879	9.5854	37510.5	0	?	0	535	Calibration	-
880	9.5963	37402.5	0	?	0	535	Calibration	-
881	9.6072	37448.2	0	?	0	535	Calibration	-
882	9.618	37541.4	0	?	0	535	Calibration	-
883	9.6289	37547.2	0	?	0	535	Calibration	-
884	9.6398	37539.2	0	?	0	535	Calibration	-
885	9.6507	37527.8	0	?	0	535	Calibration	-
886	9.6616	37471.8	0	?	0	535	Calibration	-
887	9.6725	37416.6	0	?	0	535	Calibration	-
888	9.6834	37495.2	0	?	0	535	Calibration	-
889	9.6943	37511.2	0	?	0	535	Calibration	-
890	9.7052	37442.8	0	?	0	535	Calibration	-
891	9.7161	37550.8	0	?	0	535	Calibration	-
892	9.727	37597.7	0	?	0	535	Calibration	-
893	9.7379	37571	0	?	0	535	Calibration	-
894	9.7488	37511.5	0	?	0	535	Calibration	-
895	9.7596	37498.3	0	?	0	535	Calibration	-
896	9.7705	37427.5	0	?	0	535	Calibration	-
897	9.7814	37435.8	0	?	0	535	Calibration	-
898	9.7923	37432	0	?	0	535	Calibration	-
899	9.8032	37535.1	0	?	0	535	Calibration	-
900	9.8141	37533.3	0	?	0	535	Calibration	-
901	9.825	37466.2	0	?	0	535	Calibration	-
902	9.8359	37606.5	0	?	0	535	Calibration	-
903	9.8468	37578.7	0	?	0	535	Calibration	-
904	9.8577	37553.3	0	?	0	535	Calibration	-
905	9.8686	37500.7	0	?	0	535	Calibration	-
906	9.8795	37442.5	0	?	0	535	Calibration	-
907	9.8904	37505.6	0	?	0	535	Calibration	-
908	9.9012	37489	0	?	0	535	Calibration	-
909	9.9121	37468.8	0	?	0	535	Calibration	-
910	9.923	37553	0	?	0	535	Calibration	-
911	9.9339	37534.4	0	?	0	535	Calibration	-
912	9.9448	37657.9	0	?	0	535	Calibration	-
913	9.9557	37574.7	0	?	0	535	Calibration	-
914	9.9666	37529.9	0	?	0	535	Calibration	-
915	9.9775	37579.2	0	?	0	535	Calibration	-
916	9.9884	37342.8	0	?	0	535	Calibration	-
917	9.9993	37469.2	0	?	0	535	Calibration	-
918	10.0102	37454.9	0	?	0	535	Calibration	-
919	10.0211	37551.4	0	?	0	535	Calibration	-
920	10.032	37586.4	0	?	0	535	Calibration	-
921	10.0428	37584.3	0	?	0	535	Calibration	-
922	10.0537	37447.9	0	?	0	535	Calibration	-
923	10.0646	37488	0	?	0	535	Calibration	-
924	10.0755	37504.5	0	?	0	535	Calibration	-
925	10.0864	37513.4	0	?	0	535	Calibration	-
926	10.0973	37338.2	0	?	0	535	Calibration	-
927	10.1082	37400.7	0	?	0	535	Calibration	-
928	10.1191	37426.5	0	?	0	535	Calibration	-
929	10.13	37394.4	0	?	0	535	Calibration	-
930	10.1409	37431.9	0	?	0	535	Calibration	-
931	10.1518	37489.3	0	?	0	535	Calibration	-
932	10.1627	37435.5	0	?	0	535	Calibration	-
933	10.1736	37512.8	0	?	0	535	Calibration	-
934	10.1845	37444.5	0	?	0	535	Calibration	-
935	10.1953	37395.1	0	?	0	535	Calibration	-
936	10.2062	37424.1	0	?	0	535	Calibration	-
937	10.2171	37287.3	0	?	0	535	Calibration	-
938	10.228	37403.2	0	?	0	535	Calibration	-
939	10.2389	37533.2	0	?	0	535	Calibration	-
940	10.2498	37476.9	0	?	0	535	Calibration	-
941	10.2607	37511.3	0	?	0	535	Calibration	-
942	10.2716	37422.4	0	?	0	535	Calibration	-
943	10.2825	37397.3	0	?	0	535	Calibration	-
944	10.2934	37552.5	0	?	0	535	Calibration	-
945	10.3043	37322.8	0	?	0	535	Calibration	-
946	10.3152	37522.3	0	?	0	535	Calibration	-
947	10.3261	37422.6	0	?	0	535	Calibration	-
948	10.3369	37579.8	0	?	0	535	Calibration	-
949	10.3478	37406.1	0	?	0	535	Calibration	-
950	10.3587	37366.3	0	?	0	535	Calibration	-
951	10.3696	37352.5	0	?	0	535	Calibration	-
952	10.3805	37387	0	?	0	535	Calibration	-
953	10.3914	37450.2	0	?	0	535	Calibration	-
954	10.4023	37413.7	0	?	0	535	Calibration	-
955	10.4132	37342.9	0	?	0	535	Calibration	-
956	10.4241	37283.1	0	?	0	535	Calibration	-
957	10.435	37438.2	0	?	0	535	Calibration	-
958	10.4459	37386	0	?	0	535	Calibration	-
959	10.4568	37506.6	0	?	0	535	Calibration	-
960	10.4677	37477.3	0	?	0	535	Calibration	-
961	10.4785	37310.5	0	?	0	535	Calibration	-
962	10.4894	37382.9	0	?	0	535	Calibration	-
963	10.5003	37498.5	0	?	0	535	Calibration	-
964	10.5112	37333.1	0	?	0	535	Calibration	-
965	10.5221	37402.4	0	?	0	535	Calibration	-
966	10.533	37530.5	0	?	0	535	Calibration	-
967	10.5439	37499.2	0	?	0	535	Calibration	-
968	10.5548	37377.8	0	?	0	535	Calibration	-
969	10.5657	37441.7	0	?	0	535	Calibration	-
970	10.5766	37462.7	0	?	0	535	Calibration	-
971	10.5875	37418.4	0	?	0	535	Calibration	-
972	10.5984	37370.5	0	?	0	535	Calibration	-
973	10.6093	37474.7	0	?	0	535	Calibration	-
974	10.6201	37363.7	0	?	0	535	Calibration	-
975	10.631	37469.9	0	?	0	535	Calibration	-
976	10.6419	37341.7	0	?	0	535	Calibration	-
977	10.6528	37325.1	0	?	0	535	Calibration	-
978	10.6637	37318.9	0	?	0	535	Calibration	-
979	10.6746	37287.2	0	?	0	535	Calibration	-
980	10.6855	37371.5	0	?	0	535	Calibration	-
981	10.6964	37357.8	0	?	0	535	Calibration	-
982	10.7073	37455.4	0	?	0	535	Calibration	-
983	10.7182	37443.6	0	?	0	535	Calibration	-
984	10.7291	37398	0	?	0	535	Calibration	-
985	10.74	37386.8	0	?	0	535	Calibration	-
986	10.7509	37416.4	0	?	0	535	Calibration	-
987	10.7618	37420.9	0	?	0	535	Calibration	-
988	10.7726	37401.8	0	?	0	535	Calibration	-
989	10.7835	37447.2	0	?	0	535	Calibration	-
990	10.7944	37460.6	0	?	0	535	Calibration	-
991	10.8053	37448.9	0	?	0	535	Calibration	-
992	10.8162	37327.8	0	?	0	535	Calibration	-
993	10.8271	37498.8	0	?	0	535	Calibration	-
994	10.838	37434.9	0	?	0	535	Calibration	-
995	10.8489	37434.5	0	?	0	535	Calibration	-
996	10.8598	37407.7	0	?	0	535	Calibration	-
997	10.8707	37525.7	0	?	0	535	Calibration	-
998	10.8816	37371.5	0	?	0	535	Calibration	-
999	10.8925	37382.3	0	?	0	535	Calibration	-
1000	10.9034	37444.1	0	?	0	535	Calibration	-
1001	10.9142	37388.9	0	?	0	535	Calibration	-
1002	10.9251	37525.6	0	?	0	535	Calibration	-
1003	10.936	37321.2	0	?	0	535	Calibration	-
1004	10.9469	37375.2	0	?	0	535	Calibration	-
1005	10.9578	37288.5	0	?	0	535	Calibration	-
1006	10.9687	37468.7	0	?	0	535	Calibration	-
1007	10.9796	37234.2	0	?	0	535	Calibration	-
1008	10.9905	37421.1	0	?	0	535	Calibration	-
1009	11.0014	37379.9	0	?	0	535	Calibration	-
1010	11.0123	37461.1	0	?	0	535	Calibration	-
1011	11.0232	37435.8	0	?	0	535	Calibration	-
1012	11.0341	37452.8	0	?	0	535	Calibration	-
1013	11.045	37446.6	0	?	0	535	Calibration	-
1014	11.0558	37384.5	0	?	0	535	Calibration	-
1015	11.0667	37362.2	0	?	0	535	Calibration	-
1016	11.0776	37406	0	?	0	535	Calibration	-
1017	11.0885	37416.7	0	?	0	535	Calibration	-
1018	11.0994	37460.8	0	?	0	535	Calibration	-
1019	11.1103	37341.3	0	?	0	535	Calibration	-
1020	11.1212	37543.5	0	?	0	535	Calibration	-
1021	11.1321	37426.4	0	?	0	535	Calibration	-
1022	11.143	37326.8	0	?	0	535	Calibration	-
1023	11.1539	37318	0	?	0	535	Calibration	-
1024	11.1648	37356.8	0	?	0	535	Calibration	-
1025	11.1757	37306.1	0	?	0	535	Calibration	-
1026	11.1866	37341.6	0	?	0	535	Calibration	-
1027	11.1974	37024.5	0	?	0	535	Calibration	-
1028	11.2083	37381.9	0	?	0	535	Calibration	-
1029	11.2192	37313.9	0	?	0	535	Calibration	-
1030	11.2301	37336.6	0	?	0	535	Calibration	-
1031	11.241	37364.7	0	?	0	535	Calibration	-
1032	11.2519	37469.6	0	?	0	535	Calibration	-
1033	11.2628	37363.5	0	?	0	535	Calibration	-
1034	11.2737	37326.8	0	?	0	535	Calibration	-
1035	11.2846	37345.5	0	?	0	535	Calibration	-
1036	11.2955	37232.1	0	?	0	535	Calibration	-
1037	11.3064	37390.2	0	?	0	535	Calibration	-
1038	11.3173	37415.5	0	?	0	535	Calibration	-
1039	11.3282	37464.6	0	?	0	535	Calibration	-
1040	11.3391	37502.3	0	?	0	535	Calibration	-
1041	11.3499	37391.5	0	?	0	535	Calibration	-
1042	11.3608	37444.3	0	?	0	535	Calibration	-
1043	11.3717	37421.3	0	?	0	535	Calibration	-
1044	11.3826	37453.4	0	?	0	535	Calibration	-
1045	11.3935	37370.7	0	?	0	535	Calibration	-
1046	11.4044	37436.6	0	?	0	535	Calibration	-
1047	11.4153	37307.6	0	?	0	535	Calibration	-
1048	11.4262	37330.4	0	?	0	535	Calibration	-
1049	11.4371	37422.9	0	?	0	535	Calibration	-
1050	11.448	37416.4	0	?	0	535	Calibration	-
1051	11.4589	37454.3	0	?	0	535	Calibration	-
1052	11.4698	37383.7	0	?	0	535	Calibration	-
1053	11.4807	37254.7	0	?	0	535	Calibration	-
1054	11.4915	37421.7	0	?	0	535	Calibration	-
1055	11.5024	37381.8	0	?	0	535	Calibration	-
1056	11.5133	37319.7	0	?	0	535	Calibration	-
1057	11.5242	37203.3	0	?	0	535	Calibration	-
1058	11.5351	37514.3	0	?	0	535	Calibration	-
1059	11.546	37174	0	?	0	535	Calibration	-
1060	11.5569	37235.8	0	?	0	535	Calibration	-
1061	11.5678	37323.2	0	?	0	535	Calibration	-
1062	11.5787	37180.6	0	?	0	535	Calibration	-
1063	11.5896	37321.6	0	?	0	535	Calibration	-
1064	11.6005	37306.8	0	?	0	535	Calibration	-
1065	11.6114	37359.8	0	?	0	535	Calibration	-
1066	11.6223	37491.2	0	?	0	535	Calibration	-
1067	11.6331	37263	0	?	0	535	Calibration	-
1068	11.644	37372.1	0	?	0	535	Calibration	-
1069	11.6549	37231.5	0	?	0	535	Calibration	-
1070	11.6658	37297	0	?	0	535	Calibration	-
1071	11.6767	37216.9	0	?	0	535	Calibration	-
1072	11.6876	37302.7	0	?	0	535	Calibration	-
1073	11.6985	37293.8	0	?	0	535	Calibration	-
1074	11.7094	37225.8	0	?	0	535	Calibration	-
1075	11.7203	37374.2	0	?	0	535	Calibration	-
1076	11.7312	37361.8	0	?	0	535	Calibration	-
1077	11.7421	37395.9	0	?	0	535	Calibration	-
1078	11.753	37379.9	0	?	0	535	Calibration	-
1079	11.7639	37303.6	0	?	0	535	Calibration	-
1080	11.7747	37393.2	0	?	0	535	Calibration	-
1081	11.7856	37248.1	0	?	0	535	Calibration	-
1082	11.7965	37278.8	0	?	0	535	Calibration	-
1083	11.8074	37428	0	?	0	535	Calibration	-
1084	11.8183	37416.5	0	?	0	535	Calibration	-
1085	11.8292	37372.6	0	?	0	535	Calibration	-
1086	11.8401	37282	0	?	0	535	Calibration	-
1087	11.851	37293.3	0	?	0	535	Calibration	-
1088	11.8619	37471	0	?	0	535	Calibration	-
1089	11.8728	37290	0	?	0	535	Calibration	-
1090	11.8837	37299.7	0	?	0	535	Calibration	-
1091	11.8946	37276	0	?	0	535	Calibration	-
1092	11.9055	37374	0	?	0	535	Calibration	-
1093	11.9164	37167.6	0	?	0	535	Calibration	-
1094	11.9272	37487.2	0	?	0	535	Calibration	-
1095	11.9381	37434.9	0	?	0	535	Calibration	-
1096	11.949	37321.6	0	?	0	535	Calibration	-
1097	11.9599	37250.4	0	?	0	535	Calibration	-
1098	11.9708	37294.4	0	?	0	535	Calibration	-
1099	11.9817	37446.7	0	?	0	535	Calibration	-
1100	11.9926	37252.8	0	?	0	535	Calibration	-
1101	12.0035	37346.7	0	?	0	535	Calibration	-
1102	12.0144	37339.6	0	?	0	535	Calibration	-
1103	12.0253	37402.5	0	?	0	535	Calibration	-
1104	12.0362	37278.6	0	?	0	535	Calibration	-
1105	12.0471	37297.7	0	?	0	535	Calibration	-
1106	12.058	37326.6	0	?	0	535	Calibration	-
1107	12.0688	37329.2	0	?	0	535	Calibration	-
1108	12.0797	37385.5	0	?	0	535	Calibration	-
1109	12.0906	37319	0	?	0	535	Calibration	-
1110	12.1015	37204.4	0	?	0	535	Calibration	-
1111	12.1124	37403.9	0	?	0	535	Calibration	-
1112	12.1233	37265.8	0	?	0	535	Calibration	-
1113	12.1342	37303	0	?	0	535	Calibration	-
1114	12.1451	37241.1	0	?	0	535	Calibration	-
1115	12.156	37171.8	0	?	0	535	Calibration	-
1116	12.1669	37373.6	0	?	0	535	Calibration	-
1117	12.1778	37204.4	0	?	0	535	Calibration	-
1118	12.1887	37357.8	0	?	0	535	Calibration	-
1119	12.1996	37303.4	0	?	0	535	Calibration	-
1120	12.2104	37279	0	?	0	535	Calibration	-
1121	12.2213	37098	0	?	0	535	Calibration	-
1122	12.2322	37180.3	0	?	0	535	Calibration	-
1123	12.2431	37106.3	0	?	0	535	Calibration	-
1124	12.254	37162.5	0	?	0	535	Calibration	-
1125	12.2649	37316.7	0	?	0	535	Calibration	-
1126	12.2758	37244.2	0	?	0	535	Calibration	-
1127	12.2867	37255.3	0	?	0	535	Calibration	-
1128	12.2976	37144.6	0	?	0	535	Calibration	-
1129	12.3085	37236.7	0	?	0	535	Calibration	-
1130	12.3194	37285.3	0	?	0	535	Calibration	-
1131	12.3303	37391.2	0	?	0	535	Calibration	-
1132	12.3412	37222.5	0	?	0	535	Calibration	-
1133	12.3521	37127.8	0	?	0	535	Calibration	-
1134	12.3629	37248.5	0	?	0	535	Calibration	-
1135	12.3738	37257.8	0	?	0	535	Calibration	-
1136	12.3847	37316.7	0	?	0	535	Calibration	-
1137	12.3956	37294.6	0	?	0	535	Calibration	-
1138	12.4065	37223.3	0	?	0	535	Calibration	-
1139	12.4174	37305.1	0	?	0	535	Calibration	-
1140	12.4283	37381.9	0	?	0	535	Calibration	-
1141	12.4392	37190.6	0	?	0	535	Calibration	-
1142	12.4501	37163.3	0	?	0	535	Calibration	-
1143	12.461	37278.2	0	?	0	535	Calibration	-
1144	12.4719	37225.4	0	?	0	535	Calibration	-
1145	12.4828	37228.6	0	?	0	535	Calibration	-
1146	12.4937	37348.3	0	?	0	535	Calibration	-
1147	12.5045	37347	0	?	0	535	Calibration	-
1148	12.5154	37324.9	0	?	0	535	Calibration	-
1149	12.5263	37322.7	0	?	0	535	Calibration	-
1150	12.5372	37104	0	?	0	535	Calibration	-
1151	12.5481	37202.3	0	?	0	535	Calibration	-
1152	12.559	37223.2	0	?	0	535	Calibration	-
1153	12.5699	37291.2	0	?	0	535	Calibration	-
1154	12.5808	37218.7	0	?	0	535	Calibration	-
1155	12.5917	37300	0	?	0	535	Calibration	-
1156	12.6026	37172.6	0	?	0	535	Calibration	-
1157	12.6135	37268.5	0	?	0	535	Calibration	-
1158	12.6244	37259	0	?	0	535	Calibration	-
1159	12.6353	37263.7	0	?	0	535	Calibration	-
1160	12.6461	37234.6	0	?	0	535	Calibration	-
1161	12.657	37266.9	0	?	0	535	Calibration	-
1162	12.6679	37177.9	0	?	0	535	Calibration	-
1163	12.6788	37209.1	0	?	0	535	Calibration	-
1164	12.6897	37339.6	0	?	0	535	Calibration	-
1165	12.7006	37335.8	0	?	0	535	Calibration	-
1166	12.7115	37207.7	0	?	0	535	Calibration	-
1167	12.7224	37188.7	0	?	0	535	Calibration	-
1168	12.7333	37234.5	0	?	0	535	Calibration	-
1169	12.7442	37223.6	0	?	0	535	Calibration	-
1170	12.7551	37244.2	0	?	0	535	Calibration	-
1171	12.766	37165.7	0	?	0	535	Calibration	-
1172	12.7769	37113.8	0	?	0	535	Calibration	-
1173	12.7877	37166.5	0	?	0	535	Calibration	-
1174	12.7986	37154.3	0	?	0	535	Calibration	-
1175	12.8095	37229.7	0	?	0	535	Calibration	-
1176	12.8204	37180.2	0	?	0	535	Calibration	-
1177	12.8313	37177	0	?	0	535	Calibration	-
1178	12.8422	37075	0	?	0	535	Calibration	-
1179	12.8531	37044.2	0	?	0	535	Calibration	-
1180	12.864	37116.1	0	?	0	535	Calibration	-
1181	12.8749	37108.9	0	?	0	535	Calibration	-
1182	12.8858	37156.6	0	?	0	535	Calibration	-
1183	12.8967	37193.1	0	?	0	535	Calibration	-
1184	12.9076	37079.1	0	?	0	535	Calibration	-
1185	12.9185	37070.4	0	?	0	535	Calibration	-
1186	12.9294	37029	0	?	0	535	Calibration	-
1187	12.9402	37224.2	0	?	0	535	Calibration	-
1188	12.9511	37172.3	0	?	0	535	Calibration	-
1189	12.962	37073	0	?	0	535	Calibration	-
1190	12.9729	37217.3	0	?	0	535	Calibration	-
1191	12.9838	37213.8	0	?	0	535	Calibration	-
1192	12.9947	37069.4	0	?	0	535	Calibration	-
1193	13.0056	37085.5	0	?	0	535	Calibration	-
1194	13.0165	37060.8	0	?	0	535	Calibration	-
1195	13.0274	37194.8	0	?	0	535	Calibration	-
1196	13.0383	37280	0	?	0	535	Calibration	-
1197	13.0492	37164.9	0	?	0	535	Calibration	-
1198	13.0601	37093.4	0	?	0	535	Calibration	-
1199	13.071	37211.3	0	?	0	535	Calibration	-
1200	13.0818	36930.2	0	?	0	535	Calibration	-
1201	13.0927	37273.4	0	?	0	535	Calibration	-
1202	13.1036	36974	0	?	0	535	Calibration	-
1203	13.1145	37284.7	0	?	0	535	Calibration	-
1204	13.1254	37182.3	0	?	0	535	Calibration	-
1205	13.1363	37180.7	0	?	0	535	Calibration	-
1206	13.1472	37081.2	0	?	0	535	Calibration	-
1207	13.1581	37147.6	0	?	0	535	Calibration	-
1208	13.169	37231.8	0	?	0	535	Calibration	-
1209	13.1799	37128.1	0	?	0	535	Calibration	-
1210	13.1908	37245.3	0	?	0	535	Calibration	-
1211	13.2017	37184.8	0	?	0	535	Calibration	-
1212	13.2126	36959.4	0	?	0	535	Calibration	-
1213	13.2234	37150.1	0	?	0	535	Calibration	-
1214	13.2343	37317.3	0	?	0	535	Calibration	-
1215	13.2452	37128.6	0	?	0	535	Calibration	-
1216	13.2561	37228	0	?	0	535	Calibration	-
1217	13.267	37290.2	0	?	0	535	Calibration	-
1218	13.2779	37044.7	0	?	0	535	Calibration	-
1219	13.2888	37121.5	0	?	0	535	Calibration	-
1220	13.2997	37047.5	0	?	0	535	Calibration	-
1221	13.3106	37029.2	0	?	0	535	Calibration	-
1222	13.3215	37046.7	0	?	0	535	Calibration	-
1223	13.3324	37038.2	0	?	0	535	Calibration	-
1224	13.3433	37304.5	0	?	0	535	Calibration	-
1225	13.3542	37182.6	0	?	0	535	Calibration	-
1226	13.365	37259.7	0	?	0	535	Calibration	-
1227	13.3759	37116.3	0	?	0	535	Calibration	-
1228	13.3868	37137.6	0	?	0	535	Calibration	-
1229	13.3977	37141	0	?	0	535	Calibration	-
1230	13.4086	37073.2	0	?	0	535	Calibration	-
1231	13.4195	37116.7	0	?	0	535	Calibration	-
1232	13.4304	37042.4	0	?	0	535	Calibration	-
1233	13.4413	37237.4	0	?	0	535	Calibration	-
1234	13.4522	37013.7	0	?	0	535	Calibration	-
1235	13.4631	37215	0	?	0	535	Calibration	-
1236	13.474	37268.9	0	?	0	535	Calibration	-
1237	13.4849	37160.5	0	?	0	535	Calibration	-
1238	13.4958	37240.7	0	?	0	535	Calibration	-
1239	13.5067	37122.5	0	?	0	535	Calibration	-
1240	13.5175	37098.3	0	?	0	535	Calibration	-
1241	13.5284	37066	0	?	0	535	Calibration	-
1242	13.5393	37250.5	0	?	0	535	Calibration	-
1243	13.5502	37003.2	0	?	0	535	Calibration	-
1244	13.5611	37106.6	0	?	0	535	Calibration	-
1245	13.572	37244.9	0	?	0	535	Calibration	-
1246	13.5829	37032	0	?	0	535	Calibration	-
1247	13.5938	37148.8	0	?	0	535	Calibration	-
1248	13.6047	37212.6	0	?	0	535	Calibration	-
1249	13.6156	37112.5	0	?	0	535	Calibration	-
1250	13.6265	37019.4	0	?	0	535	Calibration	-
1251	13.6374	36955.4	0	?	0	535	Calibration	-
1252	13.6483	36981.4	0	?	0	535	Calibration	-
1253	13.6591	37077.6	0	?	0	535	Calibration	-
1254	13.67	37106	0	?	0	535	Calibration	-
1255	13.6809	37029.5	0	?	0	535	Calibration	-
1256	13.6918	37127.8	0	?	0	535	Calibration	-
1257	13.7027	37014.5	0	?	0	535	Calibration	-
1258	13.7136	37060	0	?	0	535	Calibration	-
1259	13.7245	37178.3	0	?	0	535	Calibration	-
1260	13.7354	37193.3	0	?	0	535	Calibration	-
1261	13.7463	37039.5	0	?	0	535	Calibration	-
1262	13.7572	37205.1	0	?	0	535	Calibration	-
1263	13.7681	37040	0	?	0	535	Calibration	-
1264	13.779	37017	0	?	0	535	Calibration	-
1265	13.7899	37104.9	0	?	0	535	Calibration	-
1266	13.8007	37236.4	0	?	0	535	Calibration	-
1267	13.8116	37159.5	0	?	0	535	Calibration	-
1268	13.8225	37255.8	0	?	0	535	Calibration	-
1269	13.8334	37194	0	?	0	535	Calibration	-
1270	13.8443	37148.5	0	?	0	535	Calibration	-
1271	13.8552	37179.1	0	?	0	535	Calibration	-
1272	13.8661	37182.8	0	?	0	535	Calibration	-
1273	13.877	37224.3	0	?	0	535	Calibration	-
1274	13.8879	37185.7	0	?	0	535	Calibration	-
1275	13.8988	37096.6	0	?	0	535	Calibration	-
1276	13.9097	36974	0	?	0	535	Calibration	-
1277	13.9206	37088.7	0	?	0	535	Calibration	-
1278	13.9315	37180.7	0	?	0	535	Calibration	-
1279	13.9423	36922.1	0	?	0	535	Calibration	-
1280	13.9532	37071.1	0	?	0	535	Calibration	-
1281	13.9641	37167.5	0	?	0	535	Calibration	-
1282	13.975	37174.5	0	?	0	535	Calibration	-
1283	13.9859	37055	0	?	0	535	Calibration	-
1284	13.9968	37137.2	0	?	0	535	Calibration	-
1285	14.0077	36935.8	0	?	0	535	Calibration	-
1286	14.0186	37003.3	0	?	0	535	Calibration	-
1287	14.0295	37048.2	0	?	0	535	Calibration	-
1288	14.0404	37177.7	0	?	0	535	Calibration	-
1289	14.0513	37119.3	0	?	0	535	Calibration	-
1290	14.0622	36914	0	?	0	535	Calibration	-
1291	14.0731	37280.6	0	?	0	535	Calibration	-
1292	14.084	37082.3	0	?	0	535	Calibration	-
1293	14.0948	37203.8	0	?	0	535	Calibration	-
1294	14.1057	37092.9	0	?	0	535	Calibration	-
1295	14.1166	37014.1	0	?	0	535	Calibration	-
1296	14.1275	37148.7	0	?	0	535	Calibration	-
1297	14.1384	37046.6	0	?	0	535	Calibration	-
1298	14.1493	37016.7	0	?	0	535	Calibration	-
1299	14.1602	36901.8	0	?	0	535	Calibration	-
1300	14.1711	36960.5	0	?	0	535	Calibration	-
1301	14.182	37075.9	0	?	0	535	Calibration	-
1302	14.1929	37076.8	0	?	0	535	Calibration	-
1303	14.2038	37060.2	0	?	0	535	Calibration	-
1304	14.2147	37023.5	0	?	0	535	Calibration	-
1305	14.2256	37116.5	0	?	0	535	Calibration	-
1306	14.2364	36946.5	0	?	0	535	Calibration	-
1307	14.2473	37168.2	0	?	0	535	Calibration	-
1308	14.2582	37075.3	0	?	0	535	Calibration	-
1309	14.2691	37121.8	0	?	0	535	Calibration	-
1310	14.28	37139.2	0	?	0	535	Calibration	-
1311	14.2909	37195	0	?	0	535	Calibration	-
1312	14.3018	37185.8	0	?	0	535	Calibration	-
1313	14.3127	37146.3	0	?	0	535	Calibration	-
1314	14.3236	37152.4	0	?	0	535	Calibration	-
1315	14.3345	37120.8	0	?	0	535	Calibration	-
1316	14.3454	37059.2	0	?	0	535	Calibration	-
1317	14.3563	37139.5	0	?	0	535	Calibration	-
1318	14.3672	36973	0	?	0	535	Calibration	-
1319	14.378	37056.6	0	?	0	535	Calibration	-
1320	14.3889	37227.3	0	?	0	535	Calibration	-
1321	14.3998	36996.2	0	?	0	535	Calibration	-
1322	14.4107	37072	0	?	0	535	Calibration	-
1323	14.4216	36968.5	0	?	0	535	Calibration	-
1324	14.4325	37058.8	0	?	0	535	Calibration	-
1325	14.4434	37062.2	0	?	0	535	Calibration	-
1326	14.4543	37099.8	0	?	0	535	Calibration	-
1327	14.4652	36991.4	0	?	0	535	Calibration	-
1328	14.4761	37105.6	0	?	0	535	Calibration	-
1329	14.487	37117.5	0	?	0	535	Calibration	-
1330	14.4979	37149.8	0	?	0	535	Calibration	-
1331	14.5088	36974.1	0	?	0	535	Calibration	-
1332	14.5196	37054.9	0	?	0	535	Calibration	-
1333	14.5305	37068.5	0	?	0	535	Calibration	-
1334	14.5414	37139.5	0	?	0	535	Calibration	-
1335	14.5523	37043.5	0	?	0	535	Calibration	-
1336	14.5632	37128.8	0	?	0	535	Calibration	-
1337	14.5741	36998	0	?	0	535	Calibration	-
1338	14.585	37128.2	0	?	0	535	Calibration	-
1339	14.5959	37037.1	0	?	0	535	Calibration	-
1340	14.6068	36963.3	0	?	0	535	Calibration	-
1341	14.6177	37098.2	0	?	0	535	Calibration	-
1342	14.6286	36883.8	0	?	0	535	Calibration	-
1343	14.6395	37109.7	0	?	0	535	Calibration	-
1344	14.6504	37003.5	0	?	0	535	Calibration	-
1345	14.6613	37035.4	0	?	0	535	Calibration	-
1346	14.6721	37086.1	0	?	0	535	Calibration	-
1347	14.683	36941.8	0	?	0	535	Calibration	-
1348	14.6939	37076.8	0	?	0	535	Calibration	-
1349	14.7048	37059.4	0	?	0	535	Calibration	-
1350	14.7157	37104.2	0	?	0	535	Calibration	-
1351	14.7266	36959.2	0	?	0	535	Calibration	-
1352	14.7375	37082.5	0	?	0	535	Calibration	-
1353	14.7484	37068.5	0	?	0	535	Calibration	-
1354	14.7593	37001.2	0	?	0	535	Calibration	-
1355	14.7702	36995.6	0	?	0	535	Calibration	-
1356	14.7811	37026.3	0	?	0	535	Calibration	-
1357	14.792	37043.8	0	?	0	535	Calibration	-
1358	14.8029	37194.1	0	?	0	535	Calibration	-
1359	14.8137	37142.8	0	?	0	535	Calibration	-
1360	14.8246	36977.7	0	?	0	535	Calibration	-
1361	14.8355	37105.7	0	?	0	535	Calibration	-
1362	14.8464	37159.7	0	?	0	535	Calibration	-
1363	14.8573	37030.7	0	?	0	535	Calibration	-
1364	14.8682	36954.9	0	?	0	535	Calibration	-
1365	14.8791	36922.2	0	?	0	535	Calibration	-
1366	14.89	37027.8	0	?	0	535	Calibration	-
1367	14.9009	37140.8	0	?	0	535	Calibration	-
1368	14.9118	36978.5	0	?	0	535	Calibration	-
1369	14.9227	37097.3	0	?	0	535	Calibration	-
1370	14.9336	37038	0	?	0	535	Calibration	-
1371	14.9445	37041.9	0	?	0	535	Calibration	-
1372	14.9553	37110.6	0	?	0	535	Calibration	-
1373	14.9662	36927.6	0	?	0	535	Calibration	-
1374	14.9771	36978.1	0	?	0	535	Calibration	-
1375	14.988	36874.4	0	?	0	535	Calibration	-
1376	14.9989	37028.6	0	?	0	535	Calibration	-
1377	15.0098	36837.6	0	?	0	535	Calibration	-
1378	15.0207	36889.8	0	?	0	535	Calibration	-
1379	15.0316	36973	0	?	0	535	Calibration	-
1380	15.0425	36848.7	0	?	0	535	Calibration	-
1381	15.0534	36974.5	0	?	0	535	Calibration	-
1382	15.0643	37013.7	0	?	0	535	Calibration	-
1383	15.0752	36967.8	0	?	0	535	Calibration	-
1384	15.0861	36880.9	0	?	0	535	Calibration	-
1385	15.097	37029.8	0	?	0	535	Calibration	-
1386	15.1078	36821.1	0	?	0	535	Calibration	-
1387	15.1187	36822	0	?	0	535	Calibration	-
1388	15.1296	37047.7	0	?	0	535	Calibration	-
1389	15.1405	36955.2	0	?	0	535	Calibration	-
1390	15.1514	37101.5	0	?	0	535	Calibration	-
1391	15.1623	37164.1	0	?	0	535	Calibration	-
1392	15.1732	37049.8	0	?	0	535	Calibration	-
1393	15.1841	36995.1	0	?	0	535	Calibration	-
1394	15.195	37122.7	0	?	0	535	Calibration	-
1395	15.2059	36988.9	0	?	0	535	Calibration	-
1396	15.2168	36971.7	0	?	0	535	Calibration	-
1397	15.2277	37108.9	0	?	0	535	Calibration	-
1398	15.2386	36971.4	0	?	0	535	Calibration	-
1399	15.2494	37052.6	0	?	0	535	Calibration	-
1400	15.2603	36893.8	0	?	0	535	Calibration	-
1401	15.2712	36993.8	0	?	0	535	Calibration	-
1402	15.2821	36803	0	?	0	535	Calibration	-
1403	15.293	36912.5	0	?	0	535	Calibration	-
1404	15.3039	36996.4	0	?	0	535	Calibration	-
1405	15.3148	37070	0	?	0	535	Calibration	-
1406	15.3257	36913.4	0	?	0	535	Calibration	-
1407	15.3366	37009.6	0	?	0	535	Calibration	-
1408	15.3475	37026.2	0	?	0	535	Calibration	-
1409	15.3584	37064.1	0	?	0	535	Calibration	-
1410	15.3693	36869.3	0	?	0	535	Calibration	-
1411	15.3802	36947.4	0	?	0	535	Calibration	-
1412	15.391	36927.2	0	?	0	535	Calibration	-
1413	15.4019	37045.1	0	?	0	535	Calibration	-
1414	15.4128	36894.7	0	?	0	535	Calibration	-
1415	15.4237	37068.5	0	?	0	535	Calibration	-
1416	15.4346	36978.4	0	?	0	535	Calibration	-
1417	15.4455	36936.2	0	?	0	535	Calibration	-
1418	15.4564	37030.8	0	?	0	535	Calibration	-
1419	15.4673	37085.8	0	?	0	535	Calibration	-
1420	15.4782	37056.8	0	?	0	535	Calibration	-
1421	15.4891	36892.8	0	?	0	535	Calibration	-
1422	15.5	36987.5	0	?	0	535	Calibration	-
1423	15.5109	36901.7	0	?	0	535	Calibration	-
1424	15.5218	37035.8	0	?	0	535	Calibration	-
1425	15.5326	36983.9	0	?	0	535	Calibration	-
1426	15.5435	36928.2	0	?	0	535	Calibration	-
1427	15.5544	37016.6	0	?	0	535	Calibration	-
1428	15.5653	36974.2	0	?	0	535	Calibration	-
1429	15.5762	37137.6	0	?	0	535	Calibration	-
1430	15.5871	36892	0	?	0	535	Calibration	-
1431	15.598	36978.8	0	?	0	535	Calibration	-
1432	15.6089	36929.3	0	?	0	535	Calibration	-
1433	15.6198	36967	0	?	0	535	Calibration	-
1434	15.6307	36931.1	0	?	0	535	Calibration	-
1435	15.6416	36836.8	0	?	0	535	Calibration	-
1436	15.6525	37024.9	0	?	0	535	Calibration	-
1437	15.6634	36830.4	0	?	0	535	Calibration	-
1438	15.6743	37004.7	0	?	0	535	Calibration	-
1439	15.6851	36898.2	0	?	0	535	Calibration	-
1440	15.696	37043.2	0	?	0	535	Calibration	-
1441	15.7069	36932.3	0	?	0	535	Calibration	-
1442	15.7178	37133.3	0	?	0	535	Calibration	-
1443	15.7287	36968.7	0	?	0	535	Calibration	-
1444	15.7396	36942.1	0	?	0	535	Calibration	-
1445	15.7505	36822.2	0	?	0	535	Calibration	-
1446	15.7614	36952.7	0	?	0	535	Calibration	-
1447	15.7723	36927.9	0	?	0	535	Calibration	-
1448	15.7832	37072.5	0	?	0	535	Calibration	-
1449	15.7941	36965.4	0	?	0	535	Calibration	-
1450	15.805	37002.7	0	?	0	535	Calibration	-
1451	15.8159	36884.8	0	?	0	535	Calibration	-
1452	15.8267	37085.5	0	?	0	535	Calibration	-
1453	15.8376	37005.5	0	?	0	535	Calibration	-
1454	15.8485	36983.1	0	?	0	535	Calibration	-
1455	15.8594	36873.2	0	?	0	535	Calibration	-
1456	15.8703	36928.2	0	?	0	535	Calibration	-
1457	15.8812	36947.2	0	?	0	535	Calibration	-
1458	15.8921	36871	0	?	0	535	Calibration	-
1459	15.903	36970.7	0	?	0	535	Calibration	-
1460	15.9139	36907.6	0	?	0	535	Calibration	-
1461	15.9248	36940.4	0	?	0	535	Calibration	-
1462	15.9357	36912.7	0	?	0	535	Calibration	-
1463	15.9466	36926	0	?	0	535	Calibration	-
1464	15.9575	36955.1	0	?	0	535	Calibration	-
1465	15.9683	37037.8	0	?	0	535	Calibration	-
1466	15.9792	36837.2	0	?	0	535	Calibration	-
1467	15.9901	36976.1	0	?	0	535	Calibration	-
1468	16.001	36934.9	0	?	0	535	Calibration	-
1469	16.0119	36809.9	0	?	0	535	Calibration	-
1470	16.0228	37080.8	0	?	0	535	Calibration	-
1471	16.0337	36961.9	0	?	0	535	Calibration	-
1472	16.0446	36902.3	0	?	0	535	Calibration	-
1473	16.0555	36822.2	0	?	0	535	Calibration	-
1474	16.0664	36895.5	0	?	0	535	Calibration	-
1475	16.0773	36931.5	0	?	0	535	Calibration	-
1476	16.0882	36942.3	0	?	0	535	Calibration	-
1477	16.0991	36922.9	0	?	0	535	Calibration	-
1478	16.1099	36938.9	0	?	0	535	Calibration	-
1479	16.1208	36906.1	0	?	0	535	Calibration	-
1480	16.1317	36849.6	0	?	0	535	Calibration	-
1481	16.1426	37046.6	0	?	0	535	Calibration	-
1482	16.1535	36941.5	0	?	0	535	Calibration	-
1483	16.1644	36861.5	0	?	0	535	Calibration	-
1484	16.1753	36807.8	0	?	0	535	Calibration	-
1485	16.1862	36997.3	0	?	0	535	Calibration	-
1486	16.1971	36864.6	0	?	0	535	Calibration	-
1487	16.208	36964.5	0	?	0	535	Calibration	-
1488	16.2189	37019.7	0	?	0	535	Calibration	-
1489	16.2298	37022.7	0	?	0	535	Calibration	-
1490	16.2407	36898.6	0	?	0	535	Calibration	-
1491	16.2516	36982.1	0	?	0	535	Calibration	-
1492	16.2624	36888.1	0	?	0	535	Calibration	-
1493	16.2733	37030.8	0	?	0	535	Calibration	-
1494	16.2842	36923.4	0	?	0	535	Calibration	-
1495	16.2951	36884.4	0	?	0	535	Calibration	-
1496	16.306	36901.5	0	?	0	535	Calibration	-
1497	16.3169	37004.5	0	?	0	535	Calibration	-
1498	16.3278	36929.4	0	?	0	535	Calibration	-
1499	16.3387	36895.7	0	?	0	535	Calibration	-
1500	16.3496	36956.8	0	?	0	535	Calibration	-
1501	16.3605	36831.4	0	?	0	535	Calibration	-
1502	16.3714	37026.8	0	?	0	535	Calibration	-
1503	16.3823	36947.4	0	?	0	535	Calibration	-
1504	16.3932	36951	0	?	0	535	Calibration	-
1505	16.404	36898.2	0	?	0	535	Calibration	-
1506	16.4149	36783.8	0	?	0	535	Calibration	-
1507	16.4258	36860.7	0	?	0	535	Calibration	-
1508	16.4367	36841.1	0	?	0	535	Calibration	-
1509	16.4476	36905	0	?	0	535	Calibration	-
1510	16.4585	36904.5	0	?	0	535	Calibration	-
1511	16.4694	36807.2	0	?	0	535	Calibration	-
1512	16.4803	36851.1	0	?	0	535	Calibration	-
1513	16.4912	36839	0	?	0	535	Calibration	-
1514	16.5021	36889	0	?	0	535	Calibration	-
1515	16.513	36817.4	0	?	0	535	Calibration	-
1516	16.5239	36988.2	0	?	0	535	Calibration	-
1517	16.5348	36904.8	0	?	0	535	Calibration	-
1518	16.5456	36849.2	0	?	0	535	Calibration	-
1519	16.5565	36833.9	0	?	0	535	Calibration	-
1520	16.5674	36929.4	0	?	0	535	Calibration	-
1521	16.5783	36914.4	0	?	0	535	Calibration	-
1522	16.5892	36851.6	0	?	0	535	Calibration	-
1523	16.6001	36842	0	?	0	535	Calibration	-
1524	16.611	36849.4	0	?	0	535	Calibration	-
1525	16.6219	36888	0	?	0	535	Calibration	-
1526	16.6328	36757.8	0	?	0	535	Calibration	-
1527	16.6437	37008.3	0	?	0	535	Calibration	-
1528	16.6546	36874.3	0	?	0	535	Calibration	-
1529	16.6655	37105.4	0	?	0	535	Calibration	-
1530	16.6764	36908.5	0	?	0	535	Calibration	-
1531	16.6872	36799.4	0	?	0	535	Calibration	-
1532	16.6981	37094.5	0	?	0	535	Calibration	-
1533	16.709	36888	0	?	0	535	Calibration	-
1534	16.7199	37006.6	0	?	0	535	Calibration	-
1535	16.7308	36929.2	0	?	0	535	Calibration	-
1536	16.7417	36882.5	0	?	0	535	Calibration	-
1537	16.7526	36887.5	0	?	0	535	Calibration	-
1538	16.7635	36990.2	0	?	0	535	Calibration	-
1539	16.7744	36799.3	0	?	0	535	Calibration	-
1540	16.7853	36819.9	0	?	0	535	Calibration	-
1541	16.7962	36880	0	?	0	535	Calibration	-
1542	16.8071	36908.5	0	?	0	535	Calibration	-
1543	16.818	36949.7	0	?	0	535	Calibration	-
1544	16.8289	37029	0	?	0	535	Calibration	-
1545	16.8397	36862.7	0	?	0	535	Calibration	-
1546	16.8506	36846.8	0	?	0	535	Calibration	-
1547	16.8615	36877	0	?	0	535	Calibration	-
1548	16.8724	36844.9	0	?	0	535	Calibration	-
1549	16.8833	36884.8	0	?	0	535	Calibration	-
1550	16.8942	36917.2	0	?	0	535	Calibration	-
1551	16.9051	36850.8	0	?	0	535	Calibration	-
1552	16.916	36879.6	0	?	0	535	Calibration	-
1553	16.9269	36901.7	0	?	0	535	Calibration	-
1554	16.9378	36795.4	0	?	0	535	Calibration	-
1555	16.9487	36889.1	0	?	0	535	Calibration	-
1556	16.9596	36788.8	0	?	0	535	Calibration	-
1557	16.9705	36877.1	0	?	0	535	Calibration	-
1558	16.9813	36797.5	0	?	0	535	Calibration	-
1559	16.9922	36880	0	?	0	535	Calibration	-
1560	17.0031	36846.8	0	?	0	535	Calibration	-
1561	17.014	36865.7	0	?	0	535	Calibration	-
1562	17.0249	36765.3	0	?	0	535	Calibration	-
1563	17.0358	36985	0	?	0	535	Calibration	-
1564	17.0467	36943.9	0	?	0	535	Calibration	-
1565	17.0576	36916.4	0	?	0	535	Calibration	-
1566	17.0685	36978.1	0	?	0	535	Calibration	-
1567	17.0794	36879.1	0	?	0	535	Calibration	-
1568	17.0903	36899.7	0	?	0	535	Calibration	-
1569	17.1012	36843.2	0	?	0	535	Calibration	-
1570	17.1121	36901.3	0	?	0	535	Calibration	-
1571	17.1229	37059.2	0	?	0	535	Calibration	-
1572	17.1338	36892.5	0	?	0	535	Calibration	-
1573	17.1447	36772.2	0	?	0	535	Calibration	-
1574	17.1556	37014.4	0	?	0	535	Calibration	-
1575	17.1665	36785.9	0	?	0	535	Calibration	-
1576	17.1774	36861.5	0	?	0	535	Calibration	-
1577	17.1883	36916.7	0	?	0	535	Calibration	-
1578	17.1992	36778.3	0	?	0	535	Calibration	-
1579	17.2101	36796.6	0	?	0	535	Calibration	-
1580	17.221	36949.9	0	?	0	535	Calibration	-
1581	17.2319	36739.5	0	?	0	535	Calibration	-
1582	17.2428	36951.3	0	?	0	535	Calibration	-
1583	17.2537	36886.2	0	?	0	535	Calibration	-
1584	17.2645	36868	0	?	0	535	Calibration	-
1585	17.2754	36955.7	0	?	0	535	Calibration	-
1586	17.2863	36907.7	0	?	0	535	Calibration	-
1587	17.2972	36922.3	0	?	0	535	Calibration	-
1588	17.3081	36834.3	0	?	0	535	Calibration	-
1589	17.319	36858	0	?	0	535	Calibration	-
1590	17.3299	36884.8	0	?	0	535	Calibration	-
1591	17.3408	36910.1	0	?	0	535	Calibration	-
1592	17.3517	36817.8	0	?	0	535	Calibration	-
1593	17.3626	36918	0	?	0	535	Calibration	-
1594	17.3735	36938.4	0	?	0	535	Calibration	-
1595	17.3844	36962	0	?	0	535	Calibration	-
1596	17.3953	36781.7	0	?	0	535	Calibration	-
1597	17.4062	36884.3	0	?	0	535	Calibration	-
1598	17.417	36686	0	?	0	535	Calibration	-
1599	17.4279	36886.5	0	?	0	535	Calibration	-
1600	17.4388	36734.4	0	?	0	535	Calibration	-
1601	17.4497	36890.3	0	?	0	535	Calibration	-
1602	17.4606	36883.5	0	?	0	535	Calibration	-
1603	17.4715	36910.9	0	?	0	535	Calibration	-
1604	17.4824	36741.3	0	?	0	535	Calibration	-
1605	17.4933	37053.1	0	?	0	535	Calibration	-
1606	17.5042	36700.7	0	?	0	535	Calibration	-
1607	17.5151	36812.3	0	?	0	535	Calibration	-
1608	17.526	36938.5	0	?	0	535	Calibration	-
1609	17.5369	36803.7	0	?	0	535	Calibration	-
1610	17.5478	36834.1	0	?	0	535	Calibration	-
1611	17.5586	36883	0	?	0	535	Calibration	-
1612	17.5695	36746.9	0	?	0	535	Calibration	-
1613	17.5804	36922	0	?	0	535	Calibration	-
1614	17.5913	36759.4	0	?	0	535	Calibration	-
1615	17.6022	36962.8	0	?	0	535	Calibration	-
1616	17.6131	36836.8	0	?	0	535	Calibration	-
1617	17.624	36825.1	0	?	0	535	Calibration	-
1618	17.6349	36789.1	0	?	0	535	Calibration	-
1619	17.6458	36807.3	0	?	0	535	Calibration	-
1620	17.6567	36846	0	?	0	535	Calibration	-
1621	17.6676	36996.3	0	?	0	535	Calibration	-
1622	17.6785	36787.8	0	?	0	535	Calibration	-
1623	17.6894	36899.3	0	?	0	535	Calibration	-
1624	17.7002	36827.1	0	?	0	535	Calibration	-
1625	17.7111	36740.2	0	?	0	535	Calibration	-
1626	17.722	36911.2	0	?	0	535	Calibration	-
1627	17.7329	36801.7	0	?	0	535	Calibration	-
1628	17.7438	36982.8	0	?	0	535	Calibration	-
1629	17.7547	36926.2	0	?	0	535	Calibration	-
1630	17.7656	36836	0	?	0	535	Calibration	-
1631	17.7765	36910.5	0	?	0	535	Calibration	-
1632	17.7874	36876.2	0	?	0	535	Calibration	-
1633	17.7983	36846.5	0	?	0	535	Calibration	-
1634	17.8092	36899	0	?	0	535	Calibration	-
1635	17.8201	36886.3	0	?	0	535	Calibration	-
1636	17.831	36667.4	0	?	0	535	Calibration	-
1637	17.8418	36875.4	0	?	0	535	Calibration	-
1638	17.8527	36929.5	0	?	0	535	Calibration	-
1639	17.8636	36862.6	0	?	0	535	Calibration	-
1640	17.8745	36703.5	0	?	0	535	Calibration	-
1641	17.8854	36796.5	0	?	0	535	Calibration	-
1642	17.8963	36801.7	0	?	0	535	Calibration	-
1643	17.9072	36900.6	0	?	0	535	Calibration	-
1644	17.9181	36918.6	0	?	0	535	Calibration	-
1645	17.929	36869.1	0	?	0	535	Calibration	-
1646	17.9399	36960.4	0	?	0	535	Calibration	-
1647	17.9508	36854.8	0	?	0	535	Calibration	-
1648	17.9617	36880.2	0	?	0	535	Calibration	-
1649	17.9726	36877.8	0	?	0	535	Calibration	-
1650	17.9835	36903.4	0	?	0	535	Calibration	-
1651	17.9943	36684.7	0	?	0	535	Calibration	-
1652	18.0052	36906.4	0	?	0	535	Calibration	-
1653	18.0161	36971.5	0	?	0	535	Calibration	-
1654	18.027	36767.8	0	?	0	535	Calibration	-
1655	18.0379	36845.9	0	?	0	535	Calibration	-
1656	18.0488	36811.5	0	?	0	535	Calibration	-
1657	18.0597	36758.4	0	?	0	535	Calibration	-
1658	18.0706	36861.8	0	?	0	535	Calibration	-
1659	18.0815	36932.5	0	?	0	535	Calibration	-
1660	18.0924	36981.5	0	?	0	535	Calibration	-
1661	18.1033	36834.9	0	?	0	535	Calibration	-
1662	18.1142	36833.7	0	?	0	535	Calibration	-
1663	18.1251	36883.8	0	?	0	535	Calibration	-
1664	18.1359	36814.3	0	?	0	535	Calibration	-
1665	18.1468	36926.4	0	?	0	535	Calibration	-
1666	18.1577	36863.7	0	?	0	535	Calibration	-
1667	18.1686	36909.2	0	?	0	535	Calibration	-
1668	18.1795	36915.2	0	?	0	535	Calibration	-
1669	18.1904	36893.3	0	?	0	535	Calibration	-
1670	18.2013	36964.7	0	?	0	535	Calibration	-
1671	18.2122	36792.6	0	?	0	535	Calibration	-
1672	18.2231	36905.1	0	?	0	535	Calibration	-
1673	18.234	36870.9	0	?	0	535	Calibration	-
1674	18.2449	36887.5	0	?	0	535	Calibration	-
1675	18.2558	36841.8	0	?	0	535	Calibration	-
1676	18.2667	36807.4	0	?	0	535	Calibration	-
1677	18.2775	36789	0	?	0	535	Calibration	-
1678	18.2884	36847.7	0	?	0	535	Calibration	-
1679	18.2993	36903.5	0	?	0	535	Calibration	-
1680	18.3102	36845.9	0	?	0	535	Calibration	-
1681	18.3211	36769.4	0	?	0	535	Calibration	-
1682	18.332	36830.9	0	?	0	535	Calibration	-
1683	18.3429	36782.4	0	?	0	535	Calibration	-
1684	18.3538	36655.6	0	?	0	535	Calibration	-
1685	18.3647	36877	0	?	0	535	Calibration	-
1686	18.3756	36775.2	0	?	0	535	Calibration	-
1687	18.3865	36941.2	0	?	0	535	Calibration	-
1688	18.3974	36893.4	0	?	0	535	Calibration	-
1689	18.4083	36769.7	0	?	0	535	Calibration	-
1690	18.4192	36888.7	0	?	0	535	Calibration	-
1691	18.43	36825.1	0	?	0	535	Calibration	-
1692	18.4409	36853.8	0	?	0	535	Calibration	-
1693	18.4518	36807.5	0	?	0	535	Calibration	-
1694	18.4627	36776.6	0	?	0	535	Calibration	-
1695	18.4736	36775.7	0	?	0	535	Calibration	-
1696	18.4845	36875.3	0	?	0	535	Calibration	-
1697	18.4954	36716.9	0	?	0	535	Calibration	-
1698	18.5063	36799.6	0	?	0	535	Calibration	-
1699	18.5172	36861.1	0	?	0	535	Calibration	-
1700	18.5281	36970.3	0	?	0	535	Calibration	-
1701	18.539	36824.8	0	?	0	535	Calibration	-
1702	18.5499	36801.8	0	?	0	535	Calibration	-
1703	18.5608	36915.4	0	?	0	535	Calibration	-
1704	18.5716	36816.5	0	?	0	535	Calibration	-
1705	18.5825	36752.3	0	?	0	535	Calibration	-
1706	18.5934	36998.3	0	?	0	535	Calibration	-
1707	18.6043	36887.4	0	?	0	535	Calibration	-
1708	18.6152	36841.1	0	?	0	535	Calibration	-
1709	18.6261	36885.2	0	?	0	535	Calibration	-
1710	18.637	36872.7	0	?	0	535	Calibration	-
1711	18.6479	36761	0	?	0	535	Calibration	-
1712	18.6588	36850.6	0	?	0	535	Calibration	-
1713	18.6697	36786.6	0	?	0	535	Calibration	-
1714	18.6806	36919.4	0	?	0	535	Calibration	-
1715	18.6915	36747	0	?	0	535	Calibration	-
1716	18.7024	36849.2	0	?	0	535	Calibration	-
1717	18.7132	36803.6	0	?	0	535	Calibration	-
1718	18.7241	36914	0	?	0	535	Calibration	-
1719	18.735	36823.2	0	?	0	535	Calibration	-
1720	18.7459	36751.6	0	?	0	535	Calibration	-
1721	18.7568	36881.4	0	?	0	535	Calibration	-
1722	18.7677	36751.3	0	?	0	535	Calibration	-
1723	18.7786	36698.4	0	?	0	535	Calibration	-
1724	18.7895	36701.8	0	?	0	535	Calibration	-
1725	18.8004	36935	0	?	0	535	Calibration	-
1726	18.8113	36860.1	0	?	0	535	Calibration	-
1727	18.8222	36793.4	0	?	0	535	Calibration	-
1728	18.8331	36795.2	0	?	0	535	Calibration	-
1729	18.844	36793.8	0	?	0	535	Calibration	-
1730	18.8548	36876.8	0	?	0	535	Calibration	-
1731	18.8657	36953.6	0	?	0	535	Calibration	-
1732	18.8766	36876	0	?	0	535	Calibration	-
1733	18.8875	36872.8	0	?	0	535	Calibration	-
1734	18.8984	36814.4	0	?	0	535	Calibration	-
1735	18.9093	36835.5	0	?	0	535	Calibration	-
1736	18.9202	36875.5	0	?	0	535	Calibration	-
1737	18.9311	36879.3	0	?	0	535	Calibration	-
1738	18.942	36871.4	0	?	0	535	Calibration	-
1739	18.9529	36832.6	0	?	0	535	Calibration	-
1740	18.9638	36858.4	0	?	0	535	Calibration	-
1741	18.9747	36933.5	0	?	0	535	Calibration	-
1742	18.9856	36838.1	0	?	0	535	Calibration	-
1743	18.9965	36862.2	0	?	0	535	Calibration	-
1744	19.0073	36889.7	0	?	0	535	Calibration	-
1745	19.0182	36713.9	0	?	0	535	Calibration	-
1746	19.0291	36857.9	0	?	0	535	Calibration	-
1747	19.04	36803.1	0	?	0	535	Calibration	-
1748	19.0509	36847.2	0	?	0	535	Calibration	-
1749	19.0618	36796.6	0	?	0	535	Calibration	-
1750	19.0727	36755.9	0	?	0	535	Calibration	-
1751	19.0836	36871	0	?	0	535	Calibration	-
1752	19.0945	36852.3	0	?	0	535	Calibration	-
1753	19.1054	36981.1	0	?	0	535	Calibration	-
1754	19.1163	36964.7	0	?	0	535	Calibration	-
1755	19.1272	36906.5	0	?	0	535	Calibration	-
1756	19.1381	36759.2	0	?	0	535	Calibration	-
1757	19.1489	36788.2	0	?	0	535	Calibration	-
1758	19.1598	36813.7	0	?	0	535	Calibration	-
1759	19.1707	36751.4	0	?	0	535	Calibration	-
1760	19.1816	36701.6	0	?	0	535	Calibration	-
1761	19.1925	36960.9	0	?	0	535	Calibration	-
1762	19.2034	36972.5	0	?	0	535	Calibration	-
1763	19.2143	36720	0	?	0	535	Calibration	-
1764	19.2252	36750.1	0	?	0	535	Calibration	-
1765	19.2361	36922.5	0	?	0	535	Calibration	-
1766	19.247	36901	0	?	0	535	Calibration	-
1767	19.2579	36746.1	0	?	0	535	Calibration	-
1768	19.2688	36923	0	?	0	535	Calibration	-
1769	19.2797	36748.9	0	?	0	535	Calibration	-
1770	19.2905	36766.7	0	?	0	535	Calibration	-
1771	19.3014	36951.1	0	?	0	535	Calibration	-
1772	19.3123	36645.3	0	?	0	535	Calibration	-
1773	19.3232	36914.6	0	?	0	535	Calibration	-
1774	19.3341	36754.1	0	?	0	535	Calibration	-
1775	19.345	36882.1	0	?	0	535	Calibration	-
1776	19.3559	36727	0	?	0	535	Calibration	-
1777	19.3668	36895	0	?	0	535	Calibration	-
1778	19.3777	36836.2	0	?	0	535	Calibration	-
1779	19.3886	36888.7	0	?	0	535	Calibration	-
1780	19.3995	36826.7	0	?	0	535	Calibration	-
1781	19.4104	36890.3	0	?	0	535	Calibration	-
1782	19.4213	36756.3	0	?	0	535	Calibration	-
1783	19.4321	36706.1	0	?	0	535	Calibration	-
1784	19.443	36793.5	0	?	0	535	Calibration	-
1785	19.4539	36777.2	0	?	0	535	Calibration	-
1786	19.4648	36802.2	0	?	0	535	Calibration	-
1787	19.4757	36882.6	0	?	0	535	Calibration	-
1788	19.4866	36886.9	0	?	0	535	Calibration	-
1789	19.4975	36783.1	0	?	0	535	Calibration	-
1790	19.5084	36831	0	?	0	535	Calibration	-
1791	19.5193	36787.6	0	?	0	535	Calibration	-
1792	19.5302	36855.3	0	?	0	535	Calibration	-
1793	19.5411	36808	0	?	0	535	Calibration	-
1794	19.552	36926.1	0	?	0	535	Calibration	-
1795	19.5629	36844.7	0	?	0	535	Calibration	-
1796	19.5738	36878.2	0	?	0	535	Calibration	-
1797	19.5846	36847.7	0	?	0	535	Calibration	-
1798	19.5955	36831.6	0	?	0	535	Calibration	-
1799	19.6064	36919.8	0	?	0	535	Calibration	-
1800	19.6173	36694.2	0	?	0	535	Calibration	-
1801	19.6282	37021.9	0	?	0	535	Calibration	-
1802	19.6391	36948.4	0	?	0	535	Calibration	-
1803	19.65	36802.5	0	?	0	535	Calibration	-
1804	19.6609	36877	0	?	0	535	Calibration	-
1805	19.6718	36763.4	0	?	0	535	Calibration	-
1806	19.6827	36855.7	0	?	0	535	Calibration	-
1807	19.6936	36823.5	0	?	0	535	Calibration	-
1808	19.7045	36681.7	0	?	0	535	Calibration	-
1809	19.7154	36778	0	?	0	535	Calibration	-
1810	19.7262	36813.2	0	?	0	535	Calibration	-
1811	19.7371	36872.4	0	?	0	535	Calibration	-
1812	19.748	36944.2	0	?	0	535	Calibration	-
1813	19.7589	36884.9	0	?	0	535	Calibration	-
1814	19.7698	36858.5	0	?	0	535	Calibration	-
1815	19.7807	36839.9	0	?	0	535	Calibration	-
1816	19.7916	36846.6	0	?	0	535	Calibration	-
1817	19.8025	36777.2	0	?	0	535	Calibration	-
1818	19.8134	36698.6	0	?	0	535	Calibration	-
1819	19.8243	36935.2	0	?	0	535	Calibration	-
1820	19.8352	36776	0	?	0	535	Calibration	-
1821	19.8461	36733.6	0	?	0	535	Calibration	-
1822	19.857	36818	0	?	0	535	Calibration	-
1823	19.8678	36904.8	0	?	0	535	Calibration	-
1824	19.8787	36806.8	0	?	0	535	Calibration	-
1825	19.8896	36845.4	0	?	0	535	Calibration	-
1826	19.9005	36867.4	0	?	0	535	Calibration	-
1827	19.9114	36808.9	0	?	0	535	Calibration	-
1828	19.9223	36864.1	0	?	0	535	Calibration	-
1829	19.9332	36857	0	?	0	535	Bleach correction function: exp. offset = 84578.56351129415 * exp(-9.445149096184887E-6 * x) + -46417.50632629205	-
1830	19.9441	36779.2	0	?	0	535	Calculating F0: 38287.30812781069	Step 1: 0.0 %
1831	19.955	36792.1	38245.4	-3.91	-0.11	535	Hold. Current dF/F0 in tolerance range.	Step 1: 0.0 %
1832	19.9659	36971.8	38433	-3.44	0.38	535	Hold. Current dF/F0 in tolerance range.	Step 1: 0.0 %
1833	19.9768	36801	38256.4	-3.88	-0.08	535	Hold. Current dF/F0 in tolerance range.	Step 1: 0.0 %
1834	19.9877	36870.8	38329.7	-3.7	0.11	535	Hold. Current dF/F0 in tolerance range.	Step 1: 0.0 %
1835	19.9986	36872.2	38332	-3.7	0.12	535	Hold. Current dF/F0 in tolerance range.	Step 1: 0.0 %
1836	20.0094	36791.9	38249.3	-3.91	-0.1	535	Hold. Current dF/F0 in tolerance range.	Step 1: 0.0 %
1837	20.0203	36762.1	38219.2	-3.98	-0.18	535	Hold. Current dF/F0 in tolerance range.	Step 1: 0.0 %
1838	20.0312	36856.5	38318.1	-3.74	0.08	535	Hold. Current dF/F0 in tolerance range.	Step 1: 0.0 %
1839	20.0421	36721.8	38178.9	-4.09	-0.28	535	Hold. Current dF/F0 in tolerance range.	Step 1: 0.0 %
1840	20.053	36806	38267.3	-3.87	-0.05	535	Hold. Current dF/F0 in tolerance range.	Step 1: 0.0 %
1841	20.0639	36928	38394.9	-3.55	0.28	535	Hold. Current dF/F0 in tolerance range.	Step 1: 0.0 %
1842	20.0748	36836.2	38300.3	-3.79	0.03	535	Hold. Current dF/F0 in tolerance range.	Step 1: 0.0 %
1843	20.0857	36811.9	38275.9	-3.85	-0.03	535	Hold. Current dF/F0 in tolerance range.	Step 1: 0.0 %
1844	20.0966	36763.2	38226.1	-3.98	-0.16	535	Hold. Current dF/F0 in tolerance range.	Step 1: 0.0 %
1845	20.1075	36739.7	38202.4	-4.04	-0.22	535	Hold. Current dF/F0 in tolerance range.	Step 1: 0.0 %
1846	20.1184	36622.5	38081.4	-4.35	-0.54	535	Hold. Current dF/F0 in tolerance range.	Step 1: 0.0 %
1847	20.1293	36850.9	38319.7	-3.75	0.08	535	Hold. Current dF/F0 in tolerance range.	Step 1: 0.0 %
1848	20.1402	36850.7	38320.2	-3.75	0.09	535	Hold. Current dF/F0 in tolerance range.	Step 1: 0.0 %
1849	20.1511	36823.6	38292.9	-3.82	0.01	535	Hold. Current dF/F0 in tolerance range.	Step 1: 0.0 %
1850	20.1619	36815.4	38285.2	-3.84	-0.01	535	Hold. Current dF/F0 in tolerance range.	Step 1: 0.0 %
1851	20.1728	36805.5	38275.7	-3.87	-0.03	535	Hold. Current dF/F0 in tolerance range.	Step 1: 0.0 %
1852	20.1837	36898.7	38373.5	-3.63	0.23	535	Hold. Current dF/F0 in tolerance range.	Step 1: 0.0 %
1853	20.1946	36871.8	38346.3	-3.7	0.15	535	Hold. Current dF/F0 in tolerance range.	Step 1: 0.0 %
1854	20.2055	36805	38277.7	-3.87	-0.03	535	Hold. Current dF/F0 in tolerance range.	Step 1: 0.0 %
1855	20.2164	36870.4	38346.5	-3.7	0.15	535	Hold. Current dF/F0 in tolerance range.	Step 1: 0.0 %
1856	20.2273	36780.3	38253.7	-3.94	-0.09	535	Hold. Current dF/F0 in tolerance range.	Step 1: 0.0 %
1857	20.2382	36864.9	38342.4	-3.72	0.14	535	Hold. Current dF/F0 in tolerance range.	Step 1: 0.0 %
1858	20.2491	36837.8	38315.1	-3.79	0.07	535	Hold. Current dF/F0 in tolerance range.	Step 1: 0.0 %
1859	20.26	36851.1	38329.7	-3.75	0.11	535	Hold. Current dF/F0 in tolerance range.	Step 1: 0.0 %
1860	20.2709	36772.6	38248.9	-3.96	-0.1	535	Hold. Current dF/F0 in tolerance range.	Step 1: 0.0 %
1861	20.2818	36802.6	38280.9	-3.88	-0.02	535	Hold. Current dF/F0 in tolerance range.	Step 1: 0.0 %
1862	20.2927	36747	38223.8	-4.02	-0.17	535	Hold. Current dF/F0 in tolerance range.	Step 1: 0.0 %
1863	20.3035	36829.3	38310.4	-3.81	0.06	535	Hold. Current dF/F0 in tolerance range.	Step 1: 0.0 %
1864	20.3144	36810.5	38291.5	-3.86	0.01	535	Hold. Current dF/F0 in tolerance range.	Step 1: 0.0 %
1865	20.3253	36874.3	38358.8	-3.69	0.19	535	Hold. Current dF/F0 in tolerance range.	Step 1: 0.0 %
1866	20.3362	36942.5	38430.5	-3.51	0.37	535	Hold. Current dF/F0 in tolerance range.	Step 1: 0.0 %
1867	20.3471	36807	38290.4	-3.87	0.01	535	Hold. Current dF/F0 in tolerance range.	Step 1: 0.0 %
1868	20.358	36717.4	38198	-4.1	-0.23	535	Hold. Current dF/F0 in tolerance range.	Step 1: 0.0 %
1869	20.3689	36810.6	38295.8	-3.86	0.02	535	Hold. Current dF/F0 in tolerance range.	Step 1: 0.0 %
1870	20.3798	36800.5	38286.1	-3.88	0	535	Hold. Current dF/F0 in tolerance range.	Step 1: 0.0 %
1871	20.3907	36872.4	38361.7	-3.7	0.19	535	Hold. Current dF/F0 in tolerance range.	Step 1: 0.0 %
1872	20.4016	36525.1	38001.2	-4.6	-0.75	535	Hold. Current dF/F0 in tolerance range.	Step 1: 0.0 %
1873	20.4125	36738.1	38223.7	-4.05	-0.17	535	Hold. Current dF/F0 in tolerance range.	Step 1: 0.0 %
1874	20.4234	36782.3	38270.4	-3.93	-0.04	535	Hold. Current dF/F0 in tolerance range.	Step 1: 0.0 %
1875	20.4343	36886.8	38380	-3.66	0.24	535	Hold. Current dF/F0 in tolerance range.	Step 1: 0.0 %
1876	20.4451	36802.9	38293.5	-3.88	0.02	535	Hold. Current dF/F0 in tolerance range.	Step 1: 0.0 %
1877	20.456	36819.5	38311.6	-3.83	0.06	535	Hold. Current dF/F0 in tolerance range.	Step 1: 0.0 %
1878	20.4669	36727.8	38216.9	-4.07	-0.18	535	Hold. Current dF/F0 in tolerance range.	Step 1: 0.0 %
1879	20.4778	36747.9	38238.8	-4.02	-0.13	535	Hold. Current dF/F0 in tolerance range.	Step 1: 0.0 %
1880	20.4887	36813.1	38307.4	-3.85	0.05	535	Hold. Current dF/F0 in tolerance range.	Step 1: 0.0 %
1881	20.4996	36700.5	38191	-4.14	-0.25	535	Hold. Current dF/F0 in tolerance range.	Step 1: 0.0 %
1882	20.5105	36691.2	38182.2	-4.17	-0.27	535	Hold. Current dF/F0 in tolerance range.	Step 1: 0.0 %
1883	20.5214	36896.2	38396.4	-3.63	0.28	535	Hold. Current dF/F0 in tolerance range.	Step 1: 0.0 %
1884	20.5323	36872.8	38372.8	-3.69	0.22	535	Hold. Current dF/F0 in tolerance range.	Step 1: 0.0 %
1885	20.5432	36767	38263.6	-3.97	-0.06	535	Hold. Current dF/F0 in tolerance range.	Step 1: 0.0 %
1886	20.5541	36872.1	38373.8	-3.7	0.23	535	Hold. Current dF/F0 in tolerance range.	Step 1: 0.0 %
1887	20.565	36721.2	38217.5	-4.09	-0.18	535	Hold. Current dF/F0 in tolerance range.	Step 1: 0.0 %
1888	20.5759	36788.9	38288.8	-3.91	0	535	Hold. Current dF/F0 in tolerance range.	Step 1: 0.0 %
1889	20.5868	36798.7	38299.8	-3.89	0.03	535	Hold. Current dF/F0 in tolerance range.	Step 1: 0.0 %
1890	20.5976	36846.5	38350.3	-3.76	0.16	535	Hold. Current dF/F0 in tolerance range.	Step 1: 0.0 %
1891	20.6085	36776.9	38278.8	-3.94	-0.02	535	Hold. Current dF/F0 in tolerance range.	Step 1: 0.0 %
1892	20.6194	36832.8	38337.7	-3.8	0.13	535	Hold. Current dF/F0 in tolerance range.	Step 1: 0.0 %
1893	20.6303	36856.1	38362.8	-3.74	0.2	535	Hold. Current dF/F0 in tolerance range.	Step 1: 0.0 %
1894	20.6412	36904	38413.5	-3.61	0.33	535	Hold. Current dF/F0 in tolerance range.	Step 1: 0.0 %
1895	20.6521	36796.2	38302.2	-3.89	0.04	535	Hold. Current dF/F0 in tolerance range.	Step 1: 0.0 %
1896	20.663	36849.6	38358.6	-3.75	0.19	535	Hold. Current dF/F0 in tolerance range.	Step 1: 0.0 %
1897	20.6739	36784	38291.1	-3.93	0.01	535	Hold. Current dF/F0 in tolerance range.	Step 1: 0.0 %
1898	20.6848	36846.3	38356.8	-3.76	0.18	535	Hold. Current dF/F0 in tolerance range.	Step 1: 0.0 %
1899	20.6957	36955	38470.7	-3.48	0.48	535	Hold. Current dF/F0 in tolerance range.	Step 1: 0.0 %
1900	20.7066	36959.3	38476	-3.47	0.49	535	Hold. Current dF/F0 in tolerance range.	Step 1: 0.0 %
1901	20.7175	36779.2	38289.3	-3.94	0.01	535	Hold. Current dF/F0 in tolerance range.	Step 1: 0.0 %
1902	20.7284	36893.3	38409	-3.64	0.32	535	Hold. Current dF/F0 in tolerance range.	Step 1: 0.0 %
1903	20.7392	36967.2	38486.7	-3.45	0.52	535	Hold. Current dF/F0 in tolerance range.	Step 1: 0.0 %
1904	20.7501	36877.9	38394.6	-3.68	0.28	535	Hold. Current dF/F0 in tolerance range.	Step 1: 0.0 %
1905	20.761	36795.2	38309.3	-3.9	0.06	535	Hold. Current dF/F0 in tolerance range.	Step 1: 0.0 %
1906	20.7719	36854.7	38372	-3.74	0.22	535	Hold. Current dF/F0 in tolerance range.	Step 1: 0.0 %
1907	20.7828	36762.4	38276.7	-3.98	-0.03	535	Hold. Current dF/F0 in tolerance range.	Step 1: 0.0 %
1908	20.7937	36761.6	38276.8	-3.98	-0.03	535	Hold. Current dF/F0 in tolerance range.	Step 1: 0.0 %
1909	20.8046	36768.3	38284.5	-3.97	-0.01	535	Hold. Current dF/F0 in tolerance range.	Step 1: 0.0 %
1910	20.8155	36786.9	38304.8	-3.92	0.05	535	Hold. Current dF/F0 in tolerance range.	Step 1: 0.0 %
1911	20.8264	36933.2	38457.9	-3.54	0.45	535	Hold. Current dF/F0 in tolerance range.	Step 1: 0.0 %
1912	20.8373	36724.5	38241.4	-4.08	-0.12	535	Hold. Current dF/F0 in tolerance range.	Step 1: 0.0 %
1913	20.8482	36855.8	38378.9	-3.74	0.24	535	Hold. Current dF/F0 in tolerance range.	Step 1: 0.0 %
1914	20.8591	36750.3	38269.9	-4.01	-0.05	535	Hold. Current dF/F0 in tolerance range.	Step 1: 0.0 %
1915	20.87	36787.7	38309.7	-3.92	0.06	535	Hold. Current dF/F0 in tolerance range.	Step 1: 0.0 %
1916	20.8808	36757	38278.5	-4	-0.02	535	Hold. Current dF/F0 in tolerance range.	Step 1: 0.0 %
1917	20.8917	36901.7	38430	-3.62	0.37	535	Hold. Current dF/F0 in tolerance range.	Step 1: 0.0 %
1918	20.9026	36781.8	38305.9	-3.93	0.05	535	Hold. Current dF/F0 in tolerance range.	Step 1: 0.0 %
1919	20.9135	36809.2	38335.4	-3.86	0.13	535	Hold. Current dF/F0 in tolerance range.	Step 1: 0.0 %
1920	20.9244	36955.9	38489	-3.48	0.53	535	Hold. Current dF/F0 in tolerance range.	Step 1: 0.0 %
1921	20.9353	36912	38444	-3.59	0.41	535	Hold. Current dF/F0 in tolerance range.	Step 1: 0.0 %
1922	20.9462	36788.6	38316.4	-3.91	0.08	535	Hold. Current dF/F0 in tolerance range.	Step 1: 0.0 %
1923	20.9571	36794.2	38323	-3.9	0.09	535	Hold. Current dF/F0 in tolerance range.	Step 1: 0.0 %
1924	20.968	36906.8	38441.1	-3.61	0.4	535	Hold. Current dF/F0 in tolerance range.	Step 1: 0.0 %
1925	20.9789	36784.9	38315	-3.92	0.07	535	Hold. Current dF/F0 in tolerance range.	Step 1: 0.0 %
1926	20.9898	36892	38427.4	-3.64	0.37	535	Hold. Current dF/F0 in tolerance range.	Step 1: 0.0 %
1927	21.0007	36775	38306.3	-3.95	0.05	535	Hold. Current dF/F0 in tolerance range.	Step 1: 0.0 %
1928	21.0116	36914.1	38452	-3.59	0.43	535	Hold. Current dF/F0 in tolerance range.	Step 1: 0.0 %
1929	21.0224	36846.9	38382.8	-3.76	0.25	535	Hold. Current dF/F0 in tolerance range.	Step 1: 0.0 %
1930	21.0333	36708	38238.9	-4.12	-0.13	535	Hold. Current dF/F0 in tolerance range.	Step 1: 0.0 %
1931	21.0442	36824.6	38361.3	-3.82	0.19	535	Hold. Current dF/F0 in tolerance range.	Step 1: 0.0 %
1932	21.0551	36833.5	38371.3	-3.8	0.22	535	Hold. Current dF/F0 in tolerance range.	Step 1: 0.0 %
1933	21.066	36880	38420.6	-3.68	0.35	535	Hold. Current dF/F0 in tolerance range.	Step 1: 0.0 %
1934	21.0769	36710.9	38245.2	-4.12	-0.11	535	Hold. Current dF/F0 in tolerance range.	Step 1: 0.0 %
1935	21.0878	36939.8	38484.5	-3.52	0.51	535	Hold. Current dF/F0 in tolerance range.	Step 1: 0.0 %
1936	21.0987	36753	38290.7	-4.01	0.01	535	Hold. Current dF/F0 in tolerance range.	Step 1: 0.0 %
1937	21.1096	36989.5	38538	-3.39	0.65	535	Hold. Current dF/F0 in tolerance range.	Step 1: 0.0 %
1938	21.1205	36730.9	38269.3	-4.07	-0.05	535	Hold. Current dF/F0 in tolerance range.	Step 1: 0.0 %
1939	21.1314	36862.4	38407.2	-3.72	0.31	535	Hold. Current dF/F0 in tolerance range.	Step 1: 0.0 %
1940	21.1423	36950.3	38499.6	-3.49	0.55	535	Hold. Current dF/F0 in tolerance range.	Step 1: 0.0 %
1941	21.1532	36939.4	38489.1	-3.52	0.53	535	Hold. Current dF/F0 in tolerance range.	Step 1: 0.0 %
1942	21.1641	36789.2	38333.4	-3.91	0.12	535	Hold. Current dF/F0 in tolerance range.	Step 1: 0.0 %
1943	21.1749	36859.7	38407.7	-3.73	0.31	535	Hold. Current dF/F0 in tolerance range.	Step 1: 0.0 %
1944	21.1858	36782.3	38327.9	-3.93	0.11	535	Hold. Current dF/F0 in tolerance range.	Step 1: 0.0 %
1945	21.1967	36876.1	38426.4	-3.69	0.36	535	Hold. Current dF/F0 in tolerance range.	Step 1: 0.0 %
1946	21.2076	36867.8	38418.6	-3.71	0.34	535	Hold. Current dF/F0 in tolerance range.	Step 1: 0.0 %
1947	21.2185	36865.3	38416.8	-3.71	0.34	535	Hold. Current dF/F0 in tolerance range.	Step 1: 0.0 %
1948	21.2294	36794.7	38344	-3.9	0.15	535	Hold. Current dF/F0 in tolerance range.	Step 1: 0.0 %
1949	21.2403	36847	38399.3	-3.76	0.29	535	Hold. Current dF/F0 in tolerance range.	Step 1: 0.0 %
1950	21.2512	36829.1	38381.5	-3.81	0.25	535	Hold. Current dF/F0 in tolerance range.	Step 1: 0.0 %
1951	21.2621	36825.3	38378.4	-3.82	0.24	535	Hold. Current dF/F0 in tolerance range.	Step 1: 0.0 %
1952	21.273	36855.2	38410.4	-3.74	0.32	535	Hold. Current dF/F0 in tolerance range.	Step 1: 0.0 %
1953	21.2839	36998.5	38560.5	-3.37	0.71	535	Hold. Current dF/F0 in tolerance range.	Step 1: 0.0 %
1954	21.2948	36876.5	38434.2	-3.68	0.38	535	Hold. Current dF/F0 in tolerance range.	Step 1: 0.0 %
1955	21.3057	36909	38468.9	-3.6	0.47	535	Hold. Current dF/F0 in tolerance range.	Step 1: 0.0 %
1956	21.3165	36872.6	38431.8	-3.7	0.38	535	Hold. Current dF/F0 in tolerance range.	Step 1: 0.0 %
1957	21.3274	36763.5	38318.9	-3.98	0.08	535	Hold. Current dF/F0 in tolerance range.	Step 1: 0.0 %
1958	21.3383	36637.2	38188.1	-4.31	-0.26	535	Hold. Current dF/F0 in tolerance range.	Step 1: 0.0 %
1959	21.3492	36932.5	38496.8	-3.54	0.55	535	Hold. Current dF/F0 in tolerance range.	Step 1: 0.0 %
1960	21.3601	36793.7	38352.9	-3.9	0.17	535	Hold. Current dF/F0 in tolerance range.	Step 1: 0.0 %
1961	21.371	36837.8	38399.6	-3.79	0.29	535	Hold. Current dF/F0 in tolerance range.	Step 1: 0.0 %
1962	21.3819	36740.4	38298.9	-4.04	0.03	535	Hold. Current dF/F0 in tolerance range.	Step 1: 0.0 %
1963	21.3928	36898.8	38464.8	-3.63	0.46	535	Hold. Current dF/F0 in tolerance range.	Step 1: 0.0 %
1964	21.4037	36798.9	38361.6	-3.89	0.19	535	Hold. Current dF/F0 in tolerance range.	Step 1: 0.0 %
1965	21.4146	36763.7	38325.7	-3.98	0.1	535	Hold. Current dF/F0 in tolerance range.	Step 1: 0.0 %
1966	21.4255	36798.5	38362.8	-3.89	0.2	535	Hold. Current dF/F0 in tolerance range.	Step 1: 0.0 %
1967	21.4364	36785	38349.5	-3.92	0.16	535	Hold. Current dF/F0 in tolerance range.	Step 1: 0.0 %
1968	21.4473	36698.6	38260.3	-4.15	-0.07	535	Hold. Current dF/F0 in tolerance range.	Step 1: 0.0 %
1969	21.4581	36871.3	38441.1	-3.7	0.4	535	Hold. Current dF/F0 in tolerance range.	Step 1: 0.0 %
1970	21.469	36763.5	38329.6	-3.98	0.11	535	Hold. Current dF/F0 in tolerance range.	Step 1: 0.0 %
1971	21.4799	36770.8	38338.1	-3.96	0.13	535	Hold. Current dF/F0 in tolerance range.	Step 1: 0.0 %
1972	21.4908	36854.1	38425.7	-3.74	0.36	535	Hold. Current dF/F0 in tolerance range.	Step 1: 0.0 %
1973	21.5017	36780.3	38349.6	-3.94	0.16	535	Hold. Current dF/F0 in tolerance range.	Step 1: 0.0 %
1974	21.5126	36821.9	38393.8	-3.83	0.28	535	Hold. Current dF/F0 in tolerance range.	Step 1: 0.0 %
1975	21.5235	36749.5	38319.1	-4.02	0.08	535	Hold. Current dF/F0 in tolerance range.	Step 1: 0.0 %
1976	21.5344	36803.1	38375.8	-3.88	0.23	535	Hold. Current dF/F0 in tolerance range.	Step 1: 0.0 %
1977	21.5453	36765.4	38337.3	-3.98	0.13	535	Hold. Current dF/F0 in tolerance range.	Step 1: 0.0 %
1978	21.5562	36813.3	38388.1	-3.85	0.26	535	Hold. Current dF/F0 in tolerance range.	Step 1: 0.0 %
1979	21.5671	36809.4	38384.9	-3.86	0.25	535	Hold. Current dF/F0 in tolerance range.	Step 1: 0.0 %
1980	21.578	36944.2	38526.3	-3.51	0.62	535	Hold. Current dF/F0 in tolerance range.	Step 1: 0.0 %
1981	21.5889	36868.8	38448.4	-3.7	0.42	535	Hold. Current dF/F0 in tolerance range.	Step 1: 0.0 %
1982	21.5997	36940.1	38523.6	-3.52	0.62	535	Hold. Current dF/F0 in tolerance range.	Step 1: 0.0 %
1983	21.6106	36845.6	38425.9	-3.77	0.36	535	Hold. Current dF/F0 in tolerance range.	Step 1: 0.0 %
1984	21.6215	37017	38605.4	-3.32	0.83	535	Hold. Current dF/F0 in tolerance range.	Step 1: 0.0 %
1985	21.6324	36848.3	38430.4	-3.76	0.37	535	Hold. Current dF/F0 in tolerance range.	Step 1: 0.0 %
1986	21.6433	36757.6	38336.6	-4	0.13	535	Hold. Current dF/F0 in tolerance range.	Step 1: 0.0 %
1987	21.6542	36810	38392.1	-3.86	0.27	535	Hold. Current dF/F0 in tolerance range.	Step 1: 0.0 %
1988	21.6651	36877.4	38463.1	-3.68	0.46	535	Hold. Current dF/F0 in tolerance range.	Step 1: 0.0 %
1989	21.676	36838.5	38423.4	-3.78	0.36	535	Hold. Current dF/F0 in tolerance range.	Step 1: 0.0 %
1990	21.6869	36842.2	38428.2	-3.77	0.37	535	Hold. Current dF/F0 in tolerance range.	Step 1: 0.0 %
1991	21.6978	36766	38349.4	-3.97	0.16	535	Hold. Current dF/F0 in tolerance range.	Step 1: 0.0 %
1992	21.7087	36886.2	38475.7	-3.66	0.49	535	Hold. Current dF/F0 in tolerance range.	Step 1: 0.0 %
1993	21.7196	36791.7	38377.9	-3.91	0.24	535	Hold. Current dF/F0 in tolerance range.	Step 1: 0.0 %
[truncated: 526 more rows]

## Sheet: Figure 5C
Time	dF/F0_bleach_correct	Wavelength	dF/F0_bleach_correct	Wavelength	dF/F0_bleach_correct	Wavelength	dF/F0_bleach_correct	Wavelength	dF/F0_bleach_correct	Wavelength	dF/F0_bleach_correct	Wavelength	dF/F0_bleach_correct	Wavelength	dF/F0_bleach_correct	Wavelength	dF/F0_bleach_correct	Wavelength	dF/F0_bleach_correct	Wavelength	dF/F0_bleach_correct	Wavelength	dF/F0_bleach_correct	Wavelength	Mean DF/F0	SEM DF/F0	Mean wavelength	SEM wavelength
0.0109	0	535	0	535	0	530	0	535	0	535	0	535	0	535	0	535	0	535	0	535	0	530	0	535	0	0	534.167	0.561833
0.0218	0	535	0	535	0	530	0	535	0	535	0	535	0	535	0	535	0	535	0	535	0	530	0	535	0	0	534.167	0.561833
0.0327	0	535	0	535	0	530	0	535	0	535	0	535	0	535	0	535	0	535	0	535	0	530	0	535	0	0	534.167	0.561833
0.0436	0	535	0	535	0	530	0	535	0	535	0	535	0	535	0	535	0	535	0	535	0	530	0	535	0	0	534.167	0.561833
0.0545	0	535	0	535	0	530	0	535	0	535	0	535	0	535	0	535	0	535	0	535	0	530	0	535	0	0	534.167	0.561833
0.0654	0	535	0	535	0	530	0	535	0	535	0	535	0	535	0	535	0	535	0	535	0	530	0	535	0	0	534.167	0.561833
0.0762	0	535	0	535	0	530	0	535	0	535	0	535	0	535	0	535	0	535	0	535	0	530	0	535	0	0	534.167	0.561833
0.0871	0	535	0	535	0	530	0	535	0	535	0	535	0	535	0	535	0	535	0	535	0	530	0	535	0	0	534.167	0.561833
0.098	0	535	0	535	0	530	0	535	0	535	0	535	0	535	0	535	0	535	0	535	0	530	0	535	0	0	534.167	0.561833
0.1089	0	535	0	535	0	530	0	535	0	535	0	535	0	535	0	535	0	535	0	535	0	530	0	535	0	0	534.167	0.561833
0.1198	0	535	0	535	0	530	0	535	0	535	0	535	0	535	0	535	0	535	0	535	0	530	0	535	0	0	534.167	0.561833
0.1307	0	535	0	535	0	530	0	535	0	535	0	535	0	535	0	535	0	535	0	535	0	530	0	535	0	0	534.167	0.561833
0.1416	0	535	0	535	0	530	0	535	0	535	0	535	0	535	0	535	0	535	0	535	0	530	0	535	0	0	534.167	0.561833
0.1525	0	535	0	535	0	530	0	535	0	535	0	535	0	535	0	535	0	535	0	535	0	530	0	535	0	0	534.167	0.561833
0.1634	0	535	0	535	0	530	0	535	0	535	0	535	0	535	0	535	0	535	0	535	0	530	0	535	0	0	534.167	0.561833
0.1743	0	535	0	535	0	530	0	535	0	535	0	535	0	535	0	535	0	535	0	535	0	530	0	535	0	0	534.167	0.561833
0.1852	0	535	0	535	0	530	0	535	0	535	0	535	0	535	0	535	0	535	0	535	0	530	0	535	0	0	534.167	0.561833
0.1961	0	535	0	535	0	530	0	535	0	535	0	535	0	535	0	535	0	535	0	535	0	530	0	535	0	0	534.167	0.561833
0.207	0	535	0	535	0	530	0	535	0	535	0	535	0	535	0	535	0	535	0	535	0	530	0	535	0	0	534.167	0.561833
0.2178	0	535	0	535	0	530	0	535	0	535	0	535	0	535	0	535	0	535	0	535	0	530	0	535	0	0	534.167	0.561833
0.2287	0	535	0	535	0	530	0	535	0	535	0	535	0	535	0	535	0	535	0	535	0	530	0	535	0	0	534.167	0.561833
0.2396	0	535	0	535	0	530	0	535	0	535	0	535	0	535	0	535	0	535	0	535	0	530	0	535	0	0	534.167	0.561833
0.2505	0	535	0	535	0	530	0	535	0	535	0	535	0	535	0	535	0	535	0	535	0	530	0	535	0	0	534.167	0.561833
0.2614	0	535	0	535	0	530	0	535	0	535	0	535	0	535	0	535	0	535	0	535	0	530	0	535	0	0	534.167	0.561833
0.2723	0	535	0	535	0	530	0	535	0	535	0	535	0	535	0	535	0	535	0	535	0	530	0	535	0	0	534.167	0.561833
0.2832	0	535	0	535	0	530	0	535	0	535	0	535	0	535	0	535	0	535	0	535	0	530	0	535	0	0	534.167	0.561833
0.2941	0	535	0	535	0	530	0	535	0	535	0	535	0	535	0	535	0	535	0	535	0	530	0	535	0	0	534.167	0.561833
0.305	0	535	0	535	0	530	0	535	0	535	0	535	0	535	0	535	0	535	0	535	0	530	0	535	0	0	534.167	0.561833
0.3159	0	535	0	535	0	530	0	535	0	535	0	535	0	535	0	535	0	535	0	535	0	530	0	535	0	0	534.167	0.561833
0.3268	0	535	0	535	0	530	0	535	0	535	0	535	0	535	0	535	0	535	0	535	0	530	0	535	0	0	534.167	0.561833
0.3377	0	535	0	535	0	530	0	535	0	535	0	535	0	535	0	535	0	535	0	535	0	530	0	535	0	0	534.167	0.561833
0.3486	0	535	0	535	0	530	0	535	0	535	0	535	0	535	0	535	0	535	0	535	0	530	0	535	0	0	534.167	0.561833
0.3595	0	535	0	535	0	530	0	535	0	535	0	535	0	535	0	535	0	535	0	535	0	530	0	535	0	0	534.167	0.561833
0.3703	0	535	0	535	0	530	0	535	0	535	0	535	0	535	0	535	0	535	0	535	0	530	0	535	0	0	534.167	0.561833
0.3812	0	535	0	535	0	530	0	535	0	535	0	535	0	535	0	535	0	535	0	535	0	530	0	535	0	0	534.167	0.561833
0.3921	0	535	0	535	0	530	0	535	0	535	0	535	0	535	0	535	0	535	0	535	0	530	0	535	0	0	534.167	0.561833
0.403	0	535	0	535	0	530	0	535	0	535	0	535	0	535	0	535	0	535	0	535	0	530	0	535	0	0	534.167	0.561833
0.4139	0	535	0	535	0	530	0	535	0	535	0	535	0	535	0	535	0	535	0	535	0	530	0	535	0	0	534.167	0.561833
0.4248	0	535	0	535	0	530	0	535	0	535	0	535	0	535	0	535	0	535	0	535	0	530	0	535	0	0	534.167	0.561833
0.4357	0	535	0	535	0	530	0	535	0	535	0	535	0	535	0	535	0	535	0	535	0	530	0	535	0	0	534.167	0.561833
0.4466	0	535	0	535	0	530	0	535	0	535	0	535	0	535	0	535	0	535	0	535	0	530	0	535	0	0	534.167	0.561833
0.4575	0	535	0	535	0	530	0	535	0	535	0	535	0	535	0	535	0	535	0	535	0	530	0	535	0	0	534.167	0.561833
0.4684	0	535	0	535	0	530	0	535	0	535	0	535	0	535	0	535	0	535	0	535	0	530	0	535	0	0	534.167	0.561833
0.4793	0	535	0	535	0	530	0	535	0	535	0	535	0	535	0	535	0	535	0	535	0	530	0	535	0	0	534.167	0.561833
0.4902	0	535	0	535	0	530	0	535	0	535	0	535	0	535	0	535	0	535	0	535	0	530	0	535	0	0	534.167	0.561833
0.5011	0	535	0	535	0	530	0	535	0	535	0	535	0	535	0	535	0	535	0	535	0	530	0	535	0	0	534.167	0.561833
0.5119	0	535	0	535	0	530	0	535	0	535	0	535	0	535	0	535	0	535	0	535	0	530	0	535	0	0	534.167	0.561833
0.5228	0	535	0	535	0	530	0	535	0	535	0	535	0	535	0	535	0	535	0	535	0	530	0	535	0	0	534.167	0.561833
0.5337	0	535	0	535	0	530	0	535	0	535	0	535	0	535	0	535	0	535	0	535	0	530	0	535	0	0	534.167	0.561833
0.5446	0	535	0	535	0	530	0	535	0	535	0	535	0	535	0	535	0	535	0	535	0	530	0	535	0	0	534.167	0.561833
0.5555	0	535	0	535	0	530	0	535	0	535	0	535	0	535	0	535	0	535	0	535	0	530	0	535	0	0	534.167	0.561833
0.5664	0	535	0	535	0	530	0	535	0	535	0	535	0	535	0	535	0	535	0	535	0	530	0	535	0	0	534.167	0.561833
0.5773	0	535	0	535	0	530	0	535	0	535	0	535	0	535	0	535	0	535	0	535	0	530	0	535	0	0	534.167	0.561833
0.5882	0	535	0	535	0	530	0	535	0	535	0	535	0	535	0	535	0	535	0	535	0	530	0	535	0	0	534.167	0.561833
0.5991	0	535	0	535	0	530	0	535	0	535	0	535	0	535	0	535	0	535	0	535	0	530	0	535	0	0	534.167	0.561833
0.61	0	535	0	535	0	530	0	535	0	535	0	535	0	535	0	535	0	535	0	535	0	530	0	535	0	0	534.167	0.561833
0.6209	0	535	0	535	0	530	0	535	0	535	0	535	0	535	0	535	0	535	0	535	0	530	0	535	0	0	534.167	0.561833
0.6318	0	535	0	535	0	530	0	535	0	535	0	535	0	535	0	535	0	535	0	535	0	530	0	535	0	0	534.167	0.561833
0.6427	0	535	0	535	0	530	0	535	0	535	0	535	0	535	0	535	0	535	0	535	0	530	0	535	0	0	534.167	0.561833
0.6535	0	535	0	535	0	530	0	535	0	535	0	535	0	535	0	535	0	535	0	535	0	530	0	535	0	0	534.167	0.561833
0.6644	0	535	0	535	0	530	0	535	0	535	0	535	0	535	0	535	0	535	0	535	0	530	0	535	0	0	534.167	0.561833
0.6753	0	535	0	535	0	530	0	535	0	535	0	535	0	535	0	535	0	535	0	535	0	530	0	535	0	0	534.167	0.561833
0.6862	0	535	0	535	0	530	0	535	0	535	0	535	0	535	0	535	0	535	0	535	0	530	0	535	0	0	534.167	0.561833
0.6971	0	535	0	535	0	530	0	535	0	535	0	535	0	535	0	535	0	535	0	535	0	530	0	535	0	0	534.167	0.561833
0.708	0	535	0	535	0	530	0	535	0	535	0	535	0	535	0	535	0	535	0	535	0	530	0	535	0	0	534.167	0.561833
0.7189	0	535	0	535	0	530	0	535	0	535	0	535	0	535	0	535	0	535	0	535	0	530	0	535	0	0	534.167	0.561833
0.7298	0	535	0	535	0	530	0	535	0	535	0	535	0	535	0	535	0	535	0	535	0	530	0	535	0	0	534.167	0.561833
0.7407	0	535	0	535	0	530	0	535	0	535	0	535	0	535	0	535	0	535	0	535	0	530	0	535	0	0	534.167	0.561833
0.7516	0	535	0	535	0	530	0	535	0	535	0	535	0	535	0	535	0	535	0	535	0	530	0	535	0	0	534.167	0.561833
0.7625	0	535	0	535	0	530	0	535	0	535	0	535	0	535	0	535	0	535	0	535	0	530	0	535	0	0	534.167	0.561833
0.7734	0	535	0	535	0	530	0	535	0	535	0	535	0	535	0	535	0	535	0	535	0	530	0	535	0	0	534.167	0.561833
0.7843	0	535	0	535	0	530	0	535	0	535	0	535	0	535	0	535	0	535	0	535	0	530	0	535	0	0	534.167	0.561833
0.7951	0	535	0	535	0	530	0	535	0	535	0	535	0	535	0	535	0	535	0	535	0	530	0	535	0	0	534.167	0.561833
0.806	0	535	0	535	0	530	0	535	0	535	0	535	0	535	0	535	0	535	0	535	0	530	0	535	0	0	534.167	0.561833
0.8169	0	535	0	535	0	530	0	535	0	535	0	535	0	535	0	535	0	535	0	535	0	530	0	535	0	0	534.167	0.561833
0.8278	0	535	0	535	0	530	0	535	0	535	0	535	0	535	0	535	0	535	0	535	0	530	0	535	0	0	534.167	0.561833
0.8387	0	535	0	535	0	530	0	535	0	535	0	535	0	535	0	535	0	535	0	535	0	530	0	535	0	0	534.167	0.561833
0.8496	0	535	0	535	0	530	0	535	0	535	0	535	0	535	0	535	0	535	0	535	0	530	0	535	0	0	534.167	0.561833
0.8605	0	535	0	535	0	530	0	535	0	535	0	535	0	535	0	535	0	535	0	535	0	530	0	535	0	0	534.167	0.561833
0.8714	0	535	0	535	0	530	0	535	0	535	0	535	0	535	0	535	0	535	0	535	0	530	0	535	0	0	534.167	0.561833
0.8823	0	535	0	535	0	530	0	535	0	535	0	535	0	535	0	535	0	535	0	535	0	530	0	535	0	0	534.167	0.561833
0.8932	0	535	0	535	0	530	0	535	0	535	0	535	0	535	0	535	0	535	0	535	0	530	0	535	0	0	534.167	0.561833
0.9041	0	535	0	535	0	530	0	535	0	535	0	535	0	535	0	535	0	535	0	535	0	530	0	535	0	0	534.167	0.561833
0.915	0	535	0	535	0	530	0	535	0	535	0	535	0	535	0	535	0	535	0	535	0	530	0	535	0	0	534.167	0.561833
0.9259	0	535	0	535	0	530	0	535	0	535	0	535	0	535	0	535	0	535	0	535	0	530	0	535	0	0	534.167	0.561833
0.9368	0	535	0	535	0	530	0	535	0	535	0	535	0	535	0	535	0	535	0	535	0	530	0	535	0	0	534.167	0.561833
0.9476	0	535	0	535	0	530	0	535	0	535	0	535	0	535	0	535	0	535	0	535	0	530	0	535	0	0	534.167	0.561833
0.9585	0	535	0	535	0	530	0	535	0	535	0	535	0	535	0	535	0	535	0	535	0	530	0	535	0	0	534.167	0.561833
0.9694	0	535	0	535	0	530	0	535	0	535	0	535	0	535	0	535	0	535	0	535	0	530	0	535	0	0	534.167	0.561833
0.9803	0	535	0	535	0	530	0	535	0	535	0	535	0	535	0	535	0	535	0	535	0	530	0	535	0	0	534.167	0.561833
0.9912	0	535	0	535	0	530	0	535	0	535	0	535	0	535	0	535	0	535	0	535	0	530	0	535	0	0	534.167	0.561833
1.0021	0	535	0	535	0	530	0	535	0	535	0	535	0	535	0	535	0	535	0	535	0	530	0	535	0	0	534.167	0.561833
1.013	0	535	0	535	0	530	0	535	0	535	0	535	0	535	0	535	0	535	0	535	0	530	0	535	0	0	534.167	0.561833
1.0239	0	535	0	535	0	530	0	535	0	535	0	535	0	535	0	535	0	535	0	535	0	530	0	535	0	0	534.167	0.561833
1.0348	0	535	0	535	0	530	0	535	0	535	0	535	0	535	0	535	0	535	0	535	0	530	0	535	0	0	534.167	0.561833
1.0457	0	535	0	535	0	530	0	535	0	535	0	535	0	535	0	535	0	535	0	535	0	530	0	535	0	0	534.167	0.561833
1.0566	0	535	0	535	0	530	0	535	0	535	0	535	0	535	0	535	0	535	0	535	0	530	0	535	0	0	534.167	0.561833
1.0675	0	535	0	535	0	530	0	535	0	535	0	535	0	535	0	535	0	535	0	535	0	530	0	535	0	0	534.167	0.561833
1.0784	0	535	0	535	0	530	0	535	0	535	0	535	0	535	0	535	0	535	0	535	0	530	0	535	0	0	534.167	0.561833
1.0892	0	535	0	535	0	530	0	535	0	535	0	535	0	535	0	535	0	535	0	535	0	530	0	535	0	0	534.167	0.561833
1.1001	0	535	0	535	0	530	0	535	0	535	0	535	0	535	0	535	0	535	0	535	0	530	0	535	0	0	534.167	0.561833
1.111	0	535	0	535	0	530	0	535	0	535	0	535	0	535	0	535	0	535	0	535	0	530	0	535	0	0	534.167	0.561833
1.1219	0	535	0	535	0	530	0	535	0	535	0	535	0	535	0	535	0	535	0	535	0	530	0	535	0	0	534.167	0.561833
1.1328	0	535	0	535	0	530	0	535	0	535	0	535	0	535	0	535	0	535	0	535	0	530	0	535	0	0	534.167	0.561833
1.1437	0	535	0	535	0	530	0	535	0	535	0	535	0	535	0	535	0	535	0	535	0	530	0	535	0	0	534.167	0.561833
1.1546	0	535	0	535	0	530	0	535	0	535	0	535	0	535	0	535	0	535	0	535	0	530	0	535	0	0	534.167	0.561833
1.1655	0	535	0	535	0	530	0	535	0	535	0	535	0	535	0	535	0	535	0	535	0	530	0	535	0	0	534.167	0.561833
1.1764	0	535	0	535	0	530	0	535	0	535	0	535	0	535	0	535	0	535	0	535	0	530	0	535	0	0	534.167	0.561833
1.1873	0	535	0	535	0	530	0	535	0	535	0	535	0	535	0	535	0	535	0	535	0	530	0	535	0	0	534.167	0.561833
1.1982	0	535	0	535	0	530	0	535	0	535	0	535	0	535	0	535	0	535	0	535	0	530	0	535	0	0	534.167	0.561833
1.2091	0	535	0	535	0	530	0	535	0	535	0	535	0	535	0	535	0	535	0	535	0	530	0	535	0	0	534.167	0.561833
1.22	0	535	0	535	0	530	0	535	0	535	0	535	0	535	0	535	0	535	0	535	0	530	0	535	0	0	534.167	0.561833
1.2308	0	535	0	535	0	530	0	535	0	535	0	535	0	535	0	535	0	535	0	535	0	530	0	535	0	0	534.167	0.561833
1.2417	0	535	0	535	0	530	0	535	0	535	0	535	0	535	0	535	0	535	0	535	0	530	0	535	0	0	534.167	0.561833
1.2526	0	535	0	535	0	530	0	535	0	535	0	535	0	535	0	535	0	535	0	535	0	530	0	535	0	0	534.167	0.561833
1.2635	0	535	0	535	0	530	0	535	0	535	0	535	0	535	0	535	0	535	0	535	0	530	0	535	0	0	534.167	0.561833
1.2744	0	535	0	535	0	530	0	535	0	535	0	535	0	535	0	535	0	535	0	535	0	530	0	535	0	0	534.167	0.561833
1.2853	0	535	0	535	0	530	0	535	0	535	0	535	0	535	0	535	0	535	0	535	0	530	0	535	0	0	534.167	0.561833
1.2962	0	535	0	535	0	530	0	535	0	535	0	535	0	535	0	535	0	535	0	535	0	530	0	535	0	0	534.167	0.561833
1.3071	0	535	0	535	0	530	0	535	0	535	0	535	0	535	0	535	0	535	0	535	0	530	0	535	0	0	534.167	0.561833
1.318	0	535	0	535	0	530	0	535	0	535	0	535	0	535	0	535	0	535	0	535	0	530	0	535	0	0	534.167	0.561833
1.3289	0	535	0	535	0	530	0	535	0	535	0	535	0	535	0	535	0	535	0	535	0	530	0	535	0	0	534.167	0.561833
1.3398	0	535	0	535	0	530	0	535	0	535	0	535	0	535	0	535	0	535	0	535	0	530	0	535	0	0	534.167	0.561833
1.3507	0	535	0	535	0	530	0	535	0	535	0	535	0	535	0	535	0	535	0	535	0	530	0	535	0	0	534.167	0.561833
1.3616	0	535	0	535	0	530	0	535	0	535	0	535	0	535	0	535	0	535	0	535	0	530	0	535	0	0	534.167	0.561833
1.3724	0	535	0	535	0	530	0	535	0	535	0	535	0	535	0	535	0	535	0	535	0	530	0	535	0	0	534.167	0.561833
1.3833	0	535	0	535	0	530	0	535	0	535	0	535	0	535	0	535	0	535	0	535	0	530	0	535	0	0	534.167	0.561833
1.3942	0	535	0	535	0	530	0	535	0	535	0	535	0	535	0	535	0	535	0	535	0	530	0	535	0	0	534.167	0.561833
1.4051	0	535	0	535	0	530	0	535	0	535	0	535	0	535	0	535	0	535	0	535	0	530	0	535	0	0	534.167	0.561833
1.416	0	535	0	535	0	530	0	535	0	535	0	535	0	535	0	535	0	535	0	535	0	530	0	535	0	0	534.167	0.561833
1.4269	0	535	0	535	0	530	0	535	0	535	0	535	0	535	0	535	0	535	0	535	0	530	0	535	0	0	534.167	0.561833
1.4378	0	535	0	535	0	530	0	535	0	535	0	535	0	535	0	535	0	535	0	535	0	530	0	535	0	0	534.167	0.561833
1.4487	0	535	0	535	0	530	0	535	0	535	0	535	0	535	0	535	0	535	0	535	0	530	0	535	0	0	534.167	0.561833
1.4596	0	535	0	535	0	530	0	535	0	535	0	535	0	535	0	535	0	535	0	535	0	530	0	535	0	0	534.167	0.561833
1.4705	0	535	0	535	0	530	0	535	0	535	0	535	0	535	0	535	0	535	0	535	0	530	0	535	0	0	534.167	0.561833
1.4814	0	535	0	535	0	530	0	535	0	535	0	535	0	535	0	535	0	535	0	535	0	530	0	535	0	0	534.167	0.561833
1.4923	0	535	0	535	0	530	0	535	0	535	0	535	0	535	0	535	0	535	0	535	0	530	0	535	0	0	534.167	0.561833
1.5032	0	535	0	535	0	530	0	535	0	535	0	535	0	535	0	535	0	535	0	535	0	530	0	535	0	0	534.167	0.561833
1.5141	0	535	0	535	0	530	0	535	0	535	0	535	0	535	0	535	0	535	0	535	0	530	0	535	0	0	534.167	0.561833
1.5249	0	535	0	535	0	530	0	535	0	535	0	535	0	535	0	535	0	535	0	535	0	530	0	535	0	0	534.167	0.561833
1.5358	0	535	0	535	0	530	0	535	0	535	0	535	0	535	0	535	0	535	0	535	0	530	0	535	0	0	534.167	0.561833
1.5467	0	535	0	535	0	530	0	535	0	535	0	535	0	535	0	535	0	535	0	535	0	530	0	535	0	0	534.167	0.561833
1.5576	0	535	0	535	0	530	0	535	0	535	0	535	0	535	0	535	0	535	0	535	0	530	0	535	0	0	534.167	0.561833
1.5685	0	535	0	535	0	530	0	535	0	535	0	535	0	535	0	535	0	535	0	535	0	530	0	535	0	0	534.167	0.561833
1.5794	0	535	0	535	0	530	0	535	0	535	0	535	0	535	0	535	0	535	0	535	0	530	0	535	0	0	534.167	0.561833
1.5903	0	535	0	535	0	530	0	535	0	535	0	535	0	535	0	535	0	535	0	535	0	530	0	535	0	0	534.167	0.561833
1.6012	0	535	0	535	0	530	0	535	0	535	0	535	0	535	0	535	0	535	0	535	0	530	0	535	0	0	534.167	0.561833
1.6121	0	535	0	535	0	530	0	535	0	535	0	535	0	535	0	535	0	535	0	535	0	530	0	535	0	0	534.167	0.561833
1.623	0	535	0	535	0	530	0	535	0	535	0	535	0	535	0	535	0	535	0	535	0	530	0	535	0	0	534.167	0.561833
1.6339	0	535	0	535	0	530	0	535	0	535	0	535	0	535	0	535	0	535	0	535	0	530	0	535	0	0	534.167	0.561833
1.6448	0	535	0	535	0	530	0	535	0	535	0	535	0	535	0	535	0	535	0	535	0	530	0	535	0	0	534.167	0.561833
1.6557	0	535	0	535	0	530	0	535	0	535	0	535	0	535	0	535	0	535	0	535	0	530	0	535	0	0	534.167	0.561833
1.6665	0	535	0	535	0	530	0	535	0	535	0	535	0	535	0	535	0	535	0	535	0	530	0	535	0	0	534.167	0.561833
1.6774	0	535	0	535	0	530	0	535	0	535	0	535	0	535	0	535	0	535	0	535	0	530	0	535	0	0	534.167	0.561833
1.6883	0	535	0	535	0	530	0	535	0	535	0	535	0	535	0	535	0	535	0	535	0	530	0	535	0	0	534.167	0.561833
1.6992	0	535	0	535	0	530	0	535	0	535	0	535	0	535	0	535	0	535	0	535	0	530	0	535	0	0	534.167	0.561833
1.7101	0	535	0	535	0	530	0	535	0	535	0	535	0	535	0	535	0	535	0	535	0	530	0	535	0	0	534.167	0.561833
1.721	0	535	0	535	0	530	0	535	0	535	0	535	0	535	0	535	0	535	0	535	0	530	0	535	0	0	534.167	0.561833
1.7319	0	535	0	535	0	530	0	535	0	535	0	535	0	535	0	535	0	535	0	535	0	530	0	535	0	0	534.167	0.561833
1.7428	0	535	0	535	0	530	0	535	0	535	0	535	0	535	0	535	0	535	0	535	0	530	0	535	0	0	534.167	0.561833
1.7537	0	535	0	535	0	530	0	535	0	535	0	535	0	535	0	535	0	535	0	535	0	530	0	535	0	0	534.167	0.561833
1.7646	0	535	0	535	0	530	0	535	0	535	0	535	0	535	0	535	0	535	0	535	0	530	0	535	0	0	534.167	0.561833
1.7755	0	535	0	535	0	530	0	535	0	535	0	535	0	535	0	535	0	535	0	535	0	530	0	535	0	0	534.167	0.561833
1.7864	0	535	0	535	0	530	0	535	0	535	0	535	0	535	0	535	0	535	0	535	0	530	0	535	0	0	534.167	0.561833
1.7973	0	535	0	535	0	530	0	535	0	535	0	535	0	535	0	535	0	535	0	535	0	530	0	535	0	0	534.167	0.561833
1.8081	0	535	0	535	0	530	0	535	0	535	0	535	0	535	0	535	0	535	0	535	0	530	0	535	0	0	534.167	0.561833
1.819	0	535	0	535	0	530	0	535	0	535	0	535	0	535	0	535	0	535	0	535	0	530	0	535	0	0	534.167	0.561833
1.8299	0	535	0	535	0	530	0	535	0	535	0	535	0	535	0	535	0	535	0	535	0	530	0	535	0	0	534.167	0.561833
1.8408	0	535	0	535	0	530	0	535	0	535	0	535	0	535	0	535	0	535	0	535	0	530	0	535	0	0	534.167	0.561833
1.8517	0	535	0	535	0	530	0	535	0	535	0	535	0	535	0	535	0	535	0	535	0	530	0	535	0	0	534.167	0.561833
1.8626	0	535	0	535	0	530	0	535	0	535	0	535	0	535	0	535	0	535	0	535	0	530	0	535	0	0	534.167	0.561833
1.8735	0	535	0	535	0	530	0	535	0	535	0	535	0	535	0	535	0	535	0	535	0	530	0	535	0	0	534.167	0.561833
1.8844	0	535	0	535	0	530	0	535	0	535	0	535	0	535	0	535	0	535	0	535	0	530	0	535	0	0	534.167	0.561833
1.8953	0	535	0	535	0	530	0	535	0	535	0	535	0	535	0	535	0	535	0	535	0	530	0	535	0	0	534.167	0.561833
1.9062	0	535	0	535	0	530	0	535	0	535	0	535	0	535	0	535	0	535	0	535	0	530	0	535	0	0	534.167	0.561833
1.9171	0	535	0	535	0	530	0	535	0	535	0	535	0	535	0	535	0	535	0	535	0	530	0	535	0	0	534.167	0.561833
1.928	0	535	0	535	0	530	0	535	0	535	0	535	0	535	0	535	0	535	0	535	0	530	0	535	0	0	534.167	0.561833
1.9389	0	535	0	535	0	530	0	535	0	535	0	535	0	535	0	535	0	535	0	535	0	530	0	535	0	0	534.167	0.561833
1.9498	0	535	0	535	0	530	0	535	0	535	0	535	0	535	0	535	0	535	0	535	0	530	0	535	0	0	534.167	0.561833
1.9606	0	535	0	535	0	530	0	535	0	535	0	535	0	535	0	535	0	535	0	535	0	530	0	535	0	0	534.167	0.561833
1.9715	0	535	0	535	0	530	0	535	0	535	0	535	0	535	0	535	0	535	0	535	0	530	0	535	0	0	534.167	0.561833
1.9824	0	535	0	535	0	530	0	535	0	535	0	535	0	535	0	535	0	535	0	535	0	530	0	535	0	0	534.167	0.561833
1.9933	0	535	0	535	0	530	0	535	0	535	0	535	0	535	0	535	0	535	0	535	0	530	0	535	0	0	534.167	0.561833
2.0042	0	535	0	535	0	530	0	535	0	535	0	535	0	535	0	535	0	535	0	535	0	530	0	535	0	0	534.167	0.561833
2.0151	0	535	0	535	0	530	0	535	0	535	0	535	0	535	0	535	0	535	0	535	0	530	0	535	0	0	534.167	0.561833
2.026	0	535	0	535	0	530	0	535	0	535	0	535	0	535	0	535	0	535	0	535	0	530	0	535	0	0	534.167	0.561833
2.0369	0	535	0	535	0	530	0	535	0	535	0	535	0	535	0	535	0	535	0	535	0	530	0	535	0	0	534.167	0.561833
2.0478	0	535	0	535	0	530	0	535	0	535	0	535	0	535	0	535	0	535	0	535	0	530	0	535	0	0	534.167	0.561833
2.0587	0	535	0	535	0	530	0	535	0	535	0	535	0	535	0	535	0	535	0	535	0	530	0	535	0	0	534.167	0.561833
2.0696	0	535	0	535	0	530	0	535	0	535	0	535	0	535	0	535	0	535	0	535	0	530	0	535	0	0	534.167	0.561833
2.0805	0	535	0	535	0	530	0	535	0	535	0	535	0	535	0	535	0	535	0	535	0	530	0	535	0	0	534.167	0.561833
2.0914	0	535	0	535	0	530	0	535	0	535	0	535	0	535	0	535	0	535	0	535	0	530	0	535	0	0	534.167	0.561833
2.1022	0	535	0	535	0	530	0	535	0	535	0	535	0	535	0	535	0	535	0	535	0	530	0	535	0	0	534.167	0.561833
2.1131	0	535	0	535	0	530	0	535	0	535	0	535	0	535	0	535	0	535	0	535	0	530	0	535	0	0	534.167	0.561833
2.124	0	535	0	535	0	530	0	535	0	535	0	535	0	535	0	535	0	535	0	535	0	530	0	535	0	0	534.167	0.561833
2.1349	0	535	0	535	0	530	0	535	0	535	0	535	0	535	0	535	0	535	0	535	0	530	0	535	0	0	534.167	0.561833
2.1458	0	535	0	535	0	530	0	535	0	535	0	535	0	535	0	535	0	535	0	535	0	530	0	535	0	0	534.167	0.561833
2.1567	0	535	0	535	0	530	0	535	0	535	0	535	0	535	0	535	0	535	0	535	0	530	0	535	0	0	534.167	0.561833
2.1676	0	535	0	535	0	530	0	535	0	535	0	535	0	535	0	535	0	535	0	535	0	530	0	535	0	0	534.167	0.561833
2.1785	0	535	0	535	0	530	0	535	0	535	0	535	0	535	0	535	0	535	0	535	0	530	0	535	0	0	534.167	0.561833
2.1894	0	535	0	535	0	530	0	535	0	535	0	535	0	535	0	535	0	535	0	535	0	530	0	535	0	0	534.167	0.561833
2.2003	0	535	0	535	0	530	0	535	0	535	0	535	0	535	0	535	0	535	0	535	0	530	0	535	0	0	534.167	0.561833
2.2112	0	535	0	535	0	530	0	535	0	535	0	535	0	535	0	535	0	535	0	535	0	530	0	535	0	0	534.167	0.561833
2.2221	0	535	0	535	0	530	0	535	0	535	0	535	0	535	0	535	0	535	0	535	0	530	0	535	0	0	534.167	0.561833
2.233	0	535	0	535	0	530	0	535	0	535	0	535	0	535	0	535	0	535	0	535	0	530	0	535	0	0	534.167	0.561833
2.2438	0	535	0	535	0	530	0	535	0	535	0	535	0	535	0	535	0	535	0	535	0	530	0	535	0	0	534.167	0.561833
2.2547	0	535	0	535	0	530	0	535	0	535	0	535	0	535	0	535	0	535	0	535	0	530	0	535	0	0	534.167	0.561833
2.2656	0	535	0	535	0	530	0	535	0	535	0	535	0	535	0	535	0	535	0	535	0	530	0	535	0	0	534.167	0.561833
2.2765	0	535	0	535	0	530	0	535	0	535	0	535	0	535	0	535	0	535	0	535	0	530	0	535	0	0	534.167	0.561833
2.2874	0	535	0	535	0	530	0	535	0	535	0	535	0	535	0	535	0	535	0	535	0	530	0	535	0	0	534.167	0.561833
2.2983	0	535	0	535	0	530	0	535	0	535	0	535	0	535	0	535	0	535	0	535	0	530	0	535	0	0	534.167	0.561833
2.3092	0	535	0	535	0	530	0	535	0	535	0	535	0	535	0	535	0	535	0	535	0	530	0	535	0	0	534.167	0.561833
2.3201	0	535	0	535	0	530	0	535	0	535	0	535	0	535	0	535	0	535	0	535	0	530	0	535	0	0	534.167	0.561833
2.331	0	535	0	535	0	530	0	535	0	535	0	535	0	535	0	535	0	535	0	535	0	530	0	535	0	0	534.167	0.561833
2.3419	0	535	0	535	0	530	0	535	0	535	0	535	0	535	0	535	0	535	0	535	0	530	0	535	0	0	534.167	0.561833
2.3528	0	535	0	535	0	530	0	535	0	535	0	535	0	535	0	535	0	535	0	535	0	530	0	535	0	0	534.167	0.561833
2.3637	0	535	0	535	0	530	0	535	0	535	0	535	0	535	0	535	0	535	0	535	0	530	0	535	0	0	534.167	0.561833
2.3746	0	535	0	535	0	530	0	535	0	535	0	535	0	535	0	535	0	535	0	535	0	530	0	535	0	0	534.167	0.561833
2.3854	0	535	0	535	0	530	0	535	0	535	0	535	0	535	0	535	0	535	0	535	0	530	0	535	0	0	534.167	0.561833
2.3963	0	535	0	535	0	530	0	535	0	535	0	535	0	535	0	535	0	535	0	535	0	530	0	535	0	0	534.167	0.561833
2.4072	0	535	0	535	0	530	0	535	0	535	0	535	0	535	0	535	0	535	0	535	0	530	0	535	0	0	534.167	0.561833
2.4181	0	535	0	535	0	530	0	535	0	535	0	535	0	535	0	535	0	535	0	535	0	530	0	535	0	0	534.167	0.561833
2.429	0	535	0	535	0	530	0	535	0	535	0	535	0	535	0	535	0	535	0	535	0	530	0	535	0	0	534.167	0.561833
2.4399	0	535	0	535	0	530	0	535	0	535	0	535	0	535	0	535	0	535	0	535	0	530	0	535	0	0	534.167	0.561833
2.4508	0	535	0	535	0	530	0	535	0	535	0	535	0	535	0	535	0	535	0	535	0	530	0	535	0	0	534.167	0.561833
2.4617	0	535	0	535	0	530	0	535	0	535	0	535	0	535	0	535	0	535	0	535	0	530	0	535	0	0	534.167	0.561833
2.4726	0	535	0	535	0	530	0	535	0	535	0	535	0	535	0	535	0	535	0	535	0	530	0	535	0	0	534.167	0.561833
2.4835	0	535	0	535	0	530	0	535	0	535	0	535	0	535	0	535	0	535	0	535	0	530	0	535	0	0	534.167	0.561833
2.4944	0	535	0	535	0	530	0	535	0	535	0	535	0	535	0	535	0	535	0	535	0	530	0	535	0	0	534.167	0.561833
2.5053	0	535	0	535	0	530	0	535	0	535	0	535	0	535	0	535	0	535	0	535	0	530	0	535	0	0	534.167	0.561833
2.5162	0	535	0	535	0	530	0	535	0	535	0	535	0	535	0	535	0	535	0	535	0	530	0	535	0	0	534.167	0.561833
2.5271	0	535	0	535	0	530	0	535	0	535	0	535	0	535	0	535	0	535	0	535	0	530	0	535	0	0	534.167	0.561833
2.5379	0	535	0	535	0	530	0	535	0	535	0	535	0	535	0	535	0	535	0	535	0	530	0	535	0	0	534.167	0.561833
2.5488	0	535	0	535	0	530	0	535	0	535	0	535	0	535	0	535	0	535	0	535	0	530	0	535	0	0	534.167	0.561833
2.5597	0	535	0	535	0	530	0	535	0	535	0	535	0	535	0	535	0	535	0	535	0	530	0	535	0	0	534.167	0.561833
2.5706	0	535	0	535	0	530	0	535	0	535	0	535	0	535	0	535	0	535	0	535	0	530	0	535	0	0	534.167	0.561833
2.5815	0	535	0	535	0	530	0	535	0	535	0	535	0	535	0	535	0	535	0	535	0	530	0	535	0	0	534.167	0.561833
2.5924	0	535	0	535	0	530	0	535	0	535	0	535	0	535	0	535	0	535	0	535	0	530	0	535	0	0	534.167	0.561833
2.6033	0	535	0	535	0	530	0	535	0	535	0	535	0	535	0	535	0	535	0	535	0	530	0	535	0	0	534.167	0.561833
2.6142	0	535	0	535	0	530	0	535	0	535	0	535	0	535	0	535	0	535	0	535	0	530	0	535	0	0	534.167	0.561833
2.6251	0	535	0	535	0	530	0	535	0	535	0	535	0	535	0	535	0	535	0	535	0	530	0	535	0	0	534.167	0.561833
2.636	0	535	0	535	0	530	0	535	0	535	0	535	0	535	0	535	0	535	0	535	0	530	0	535	0	0	534.167	0.561833
2.6469	0	535	0	535	0	530	0	535	0	535	0	535	0	535	0	535	0	535	0	535	0	530	0	535	0	0	534.167	0.561833
2.6578	0	535	0	535	0	530	0	535	0	535	0	535	0	535	0	535	0	535	0	535	0	530	0	535	0	0	534.167	0.561833
2.6687	0	535	0	535	0	530	0	535	0	535	0	535	0	535	0	535	0	535	0	535	0	530	0	535	0	0	534.167	0.561833
2.6795	0	535	0	535	0	530	0	535	0	535	0	535	0	535	0	535	0	535	0	535	0	530	0	535	0	0	534.167	0.561833
2.6904	0	535	0	535	0	530	0	535	0	535	0	535	0	535	0	535	0	535	0	535	0	530	0	535	0	0	534.167	0.561833
2.7013	0	535	0	535	0	530	0	535	0	535	0	535	0	535	0	535	0	535	0	535	0	530	0	535	0	0	534.167	0.561833
2.7122	0	535	0	535	0	530	0	535	0	535	0	535	0	535	0	535	0	535	0	535	0	530	0	535	0	0	534.167	0.561833
2.7231	0	535	0	535	0	530	0	535	0	535	0	535	0	535	0	535	0	535	0	535	0	530	0	535	0	0	534.167	0.561833
2.734	0	535	0	535	0	530	0	535	0	535	0	535	0	535	0	535	0	535	0	535	0	530	0	535	0	0	534.167	0.561833
2.7449	0	535	0	535	0	530	0	535	0	535	0	535	0	535	0	535	0	535	0	535	0	530	0	535	0	0	534.167	0.561833
2.7558	0	535	0	535	0	530	0	535	0	535	0	535	0	535	0	535	0	535	0	535	0	530	0	535	0	0	534.167	0.561833
2.7667	0	535	0	535	0	530	0	535	0	535	0	535	0	535	0	535	0	535	0	535	0	530	0	535	0	0	534.167	0.561833
2.7776	0	535	0	535	0	530	0	535	0	535	0	535	0	535	0	535	0	535	0	535	0	530	0	535	0	0	534.167	0.561833
2.7885	0	535	0	535	0	530	0	535	0	535	0	535	0	535	0	535	0	535	0	535	0	530	0	535	0	0	534.167	0.561833
2.7994	0	535	0	535	0	530	0	535	0	535	0	535	0	535	0	535	0	535	0	535	0	530	0	535	0	0	534.167	0.561833
2.8103	0	535	0	535	0	530	0	535	0	535	0	535	0	535	0	535	0	535	0	535	0	530	0	535	0	0	534.167	0.561833
2.8211	0	535	0	535	0	530	0	535	0	535	0	535	0	535	0	535	0	535	0	535	0	530	0	535	0	0	534.167	0.561833
2.832	0	535	0	535	0	530	0	535	0	535	0	535	0	535	0	535	0	535	0	535	0	530	0	535	0	0	534.167	0.561833
2.8429	0	535	0	535	0	530	0	535	0	535	0	535	0	535	0	535	0	535	0	535	0	530	0	535	0	0	534.167	0.561833
2.8538	0	535	0	535	0	530	0	535	0	535	0	535	0	535	0	535	0	535	0	535	0	530	0	535	0	0	534.167	0.561833
2.8647	0	535	0	535	0	530	0	535	0	535	0	535	0	535	0	535	0	535	0	535	0	530	0	535	0	0	534.167	0.561833
2.8756	0	535	0	535	0	530	0	535	0	535	0	535	0	535	0	535	0	535	0	535	0	530	0	535	0	0	534.167	0.561833
2.8865	0	535	0	535	0	530	0	535	0	535	0	535	0	535	0	535	0	535	0	535	0	530	0	535	0	0	534.167	0.561833
2.8974	0	535	0	535	0	530	0	535	0	535	0	535	0	535	0	535	0	535	0	535	0	530	0	535	0	0	534.167	0.561833
2.9083	0	535	0	535	0	530	0	535	0	535	0	535	0	535	0	535	0	535	0	535	0	530	0	535	0	0	534.167	0.561833
2.9192	0	535	0	535	0	530	0	535	0	535	0	535	0	535	0	535	0	535	0	535	0	530	0	535	0	0	534.167	0.561833
2.9301	0	535	0	535	0	530	0	535	0	535	0	535	0	535	0	535	0	535	0	535	0	530	0	535	0	0	534.167	0.561833
2.941	0	535	0	535	0	530	0	535	0	535	0	535	0	535	0	535	0	535	0	535	0	530	0	535	0	0	534.167	0.561833
2.9519	0	535	0	535	0	530	0	535	0	535	0	535	0	535	0	535	0	535	0	535	0	530	0	535	0	0	534.167	0.561833
2.9627	0	535	0	535	0	530	0	535	0	535	0	535	0	535	0	535	0	535	0	535	0	530	0	535	0	0	534.167	0.561833
2.9736	0	535	0	535	0	530	0	535	0	535	0	535	0	535	0	535	0	535	0	535	0	530	0	535	0	0	534.167	0.561833
2.9845	0	535	0	535	0	530	0	535	0	535	0	535	0	535	0	535	0	535	0	535	0	530	0	535	0	0	534.167	0.561833
2.9954	0	535	0	535	0	530	0	535	0	535	0	535	0	535	0	535	0	535	0	535	0	530	0	535	0	0	534.167	0.561833
3.0063	0	535	0	535	0	530	0	535	0	535	0	535	0	535	0	535	0	535	0	535	0	530	0	535	0	0	534.167	0.561833
3.0172	0	535	0	535	0	530	0	535	0	535	0	535	0	535	0	535	0	535	0	535	0	530	0	535	0	0	534.167	0.561833
3.0281	0	535	0	535	0	530	0	535	0	535	0	535	0	535	0	535	0	535	0	535	0	530	0	535	0	0	534.167	0.561833
3.039	0	535	0	535	0	530	0	535	0	535	0	535	0	535	0	535	0	535	0	535	0	530	0	535	0	0	534.167	0.561833
3.0499	0	535	0	535	0	530	0	535	0	535	0	535	0	535	0	535	0	535	0	535	0	530	0	535	0	0	534.167	0.561833
3.0608	0	535	0	535	0	530	0	535	0	535	0	535	0	535	0	535	0	535	0	535	0	530	0	535	0	0	534.167	0.561833
3.0717	0	535	0	535	0	530	0	535	0	535	0	535	0	535	0	535	0	535	0	535	0	530	0	535	0	0	534.167	0.561833
3.0826	0	535	0	535	0	530	0	535	0	535	0	535	0	535	0	535	0	535	0	535	0	530	0	535	0	0	534.167	0.561833
3.0935	0	535	0	535	0	530	0	535	0	535	0	535	0	535	0	535	0	535	0	535	0	530	0	535	0	0	534.167	0.561833
3.1044	0	535	0	535	0	530	0	535	0	535	0	535	0	535	0	535	0	535	0	535	0	530	0	535	0	0	534.167	0.561833
3.1152	0	535	0	535	0	530	0	535	0	535	0	535	0	535	0	535	0	535	0	535	0	530	0	535	0	0	534.167	0.561833
3.1261	0	535	0	535	0	530	0	535	0	535	0	535	0	535	0	535	0	535	0	535	0	530	0	535	0	0	534.167	0.561833
3.137	0	535	0	535	0	530	0	535	0	535	0	535	0	535	0	535	0	535	0	535	0	530	0	535	0	0	534.167	0.561833
3.1479	0	535	0	535	0	530	0	535	0	535	0	535	0	535	0	535	0	535	0	535	0	530	0	535	0	0	534.167	0.561833
3.1588	0	535	0	535	0	530	0	535	0	535	0	535	0	535	0	535	0	535	0	535	0	530	0	535	0	0	534.167	0.561833
3.1697	0	535	0	535	0	530	0	535	0	535	0	535	0	535	0	535	0	535	0	535	0	530	0	535	0	0	534.167	0.561833
3.1806	0	535	0	535	0	530	0	535	0	535	0	535	0	535	0	535	0	535	0	535	0	530	0	535	0	0	534.167	0.561833
3.1915	0	535	0	535	0	530	0	535	0	535	0	535	0	535	0	535	0	535	0	535	0	530	0	535	0	0	534.167	0.561833
3.2024	0	535	0	535	0	530	0	535	0	535	0	535	0	535	0	535	0	535	0	535	0	530	0	535	0	0	534.167	0.561833
3.2133	0	535	0	535	0	530	0	535	0	535	0	535	0	535	0	535	0	535	0	535	0	530	0	535	0	0	534.167	0.561833
3.2242	0	535	0	535	0	530	0	535	0	535	0	535	0	535	0	535	0	535	0	535	0	530	0	535	0	0	534.167	0.561833
3.2351	0	535	0	535	0	530	0	535	0	535	0	535	0	535	0	535	0	535	0	535	0	530	0	535	0	0	534.167	0.561833
3.246	0	535	0	535	0	530	0	535	0	535	0	535	0	535	0	535	0	535	0	535	0	530	0	535	0	0	534.167	0.561833
3.2568	0	535	0	535	0	530	0	535	0	535	0	535	0	535	0	535	0	535	0	535	0	530	0	535	0	0	534.167	0.561833
3.2677	0	535	0	535	0	530	0	535	0	535	0	535	0	535	0	535	0	535	0	535	0	530	0	535	0	0	534.167	0.561833
3.2786	0	535	0	535	0	530	0	535	0	535	0	535	0	535	0	535	0	535	0	535	0	530	0	535	0	0	534.167	0.561833
3.2895	0	535	0	535	0	530	0	535	0	535	0	535	0	535	0	535	0	535	0	535	0	530	0	535	0	0	534.167	0.561833
3.3004	0	535	0	535	0	530	0	535	0	535	0	535	0	535	0	535	0	535	0	535	0	530	0	535	0	0	534.167	0.561833
3.3113	0	535	0	535	0	530	0	535	0	535	0	535	0	535	0	535	0	535	0	535	0	530	0	535	0	0	534.167	0.561833
3.3222	0	535	0	535	0	530	0	535	0	535	0	535	0	535	0	535	0	535	0	535	0	530	0	535	0	0	534.167	0.561833
3.3331	0	535	0	535	0	530	0	535	0	535	0	535	0	535	0	535	0	535	0	535	0	530	0	535	0	0	534.167	0.561833
3.344	0	535	0	535	0	530	0	535	0	535	0	535	0	535	0	535	0	535	0	535	0	530	0	535	0	0	534.167	0.561833
3.3549	0	535	0	535	0	530	0	535	0	535	0	535	0	535	0	535	0	535	0	535	0	530	0	535	0	0	534.167	0.561833
3.3658	0	535	0	535	0	530	0	535	0	535	0	535	0	535	0	535	0	535	0	535	0	530	0	535	0	0	534.167	0.561833
3.3767	0	535	0	535	0	530	0	535	0	535	0	535	0	535	0	535	0	535	0	535	0	530	0	535	0	0	534.167	0.561833
3.3876	0	535	0	535	0	530	0	535	0	535	0	535	0	535	0	535	0	535	0	535	0	530	0	535	0	0	534.167	0.561833
3.3984	0	535	0	535	0	530	0	535	0	535	0	535	0	535	0	535	0	535	0	535	0	530	0	535	0	0	534.167	0.561833
3.4093	0	535	0	535	0	530	0	535	0	535	0	535	0	535	0	535	0	535	0	535	0	530	0	535	0	0	534.167	0.561833
3.4202	0	535	0	535	0	530	0	535	0	535	0	535	0	535	0	535	0	535	0	535	0	530	0	535	0	0	534.167	0.561833
3.4311	0	535	0	535	0	530	0	535	0	535	0	535	0	535	0	535	0	535	0	535	0	530	0	535	0	0	534.167	0.561833
3.442	0	535	0	535	0	530	0	535	0	535	0	535	0	535	0	535	0	535	0	535	0	530	0	535	0	0	534.167	0.561833
3.4529	0	535	0	535	0	530	0	535	0	535	0	535	0	535	0	535	0	535	0	535	0	530	0	535	0	0	534.167	0.561833
3.4638	0	535	0	535	0	530	0	535	0	535	0	535	0	535	0	535	0	535	0	535	0	530	0	535	0	0	534.167	0.561833
3.4747	0	535	0	535	0	530	0	535	0	535	0	535	0	535	0	535	0	535	0	535	0	530	0	535	0	0	534.167	0.561833
3.4856	0	535	0	535	0	530	0	535	0	535	0	535	0	535	0	535	0	535	0	535	0	530	0	535	0	0	534.167	0.561833
3.4965	0	535	0	535	0	530	0	535	0	535	0	535	0	535	0	535	0	535	0	535	0	530	0	535	0	0	534.167	0.561833
3.5074	0	535	0	535	0	530	0	535	0	535	0	535	0	535	0	535	0	535	0	535	0	530	0	535	0	0	534.167	0.561833
3.5183	0	535	0	535	0	530	0	535	0	535	0	535	0	535	0	535	0	535	0	535	0	530	0	535	0	0	534.167	0.561833
3.5292	0	535	0	535	0	530	0	535	0	535	0	535	0	535	0	535	0	535	0	535	0	530	0	535	0	0	534.167	0.561833
3.54	0	535	0	535	0	530	0	535	0	535	0	535	0	535	0	535	0	535	0	535	0	530	0	535	0	0	534.167	0.561833
3.5509	0	535	0	535	0	530	0	535	0	535	0	535	0	535	0	535	0	535	0	535	0	530	0	535	0	0	534.167	0.561833
3.5618	0	535	0	535	0	530	0	535	0	535	0	535	0	535	0	535	0	535	0	535	0	530	0	535	0	0	534.167	0.561833
3.5727	0	535	0	535	0	530	0	535	0	535	0	535	0	535	0	535	0	535	0	535	0	530	0	535	0	0	534.167	0.561833
3.5836	0	535	0	535	0	530	0	535	0	535	0	535	0	535	0	535	0	535	0	535	0	530	0	535	0	0	534.167	0.561833
3.5945	0	535	0	535	0	530	0	535	0	535	0	535	0	535	0	535	0	535	0	535	0	530	0	535	0	0	534.167	0.561833
3.6054	0	535	0	535	0	530	0	535	0	535	0	535	0	535	0	535	0	535	0	535	0	530	0	535	0	0	534.167	0.561833
3.6163	0	535	0	535	0	530	0	535	0	535	0	535	0	535	0	535	0	535	0	535	0	530	0	535	0	0	534.167	0.561833
3.6272	0	535	0	535	0	530	0	535	0	535	0	535	0	535	0	535	0	535	0	535	0	530	0	535	0	0	534.167	0.561833
3.6381	0	535	0	535	0	530	0	535	0	535	0	535	0	535	0	535	0	535	0	535	0	530	0	535	0	0	534.167	0.561833
3.649	0	535	0	535	0	530	0	535	0	535	0	535	0	535	0	535	0	535	0	535	0	530	0	535	0	0	534.167	0.561833
3.6599	0	535	0	535	0	530	0	535	0	535	0	535	0	535	0	535	0	535	0	535	0	530	0	535	0	0	534.167	0.561833
3.6708	0	535	0	535	0	530	0	535	0	535	0	535	0	535	0	535	0	535	0	535	0	530	0	535	0	0	534.167	0.561833
3.6817	0	535	0	535	0	530	0	535	0	535	0	535	0	535	0	535	0	535	0	535	0	530	0	535	0	0	534.167	0.561833
3.6925	0	535	0	535	0	530	0	535	0	535	0	535	0	535	0	535	0	535	0	535	0	530	0	535	0	0	534.167	0.561833
3.7034	0	535	0	535	0	530	0	535	0	535	0	535	0	535	0	535	0	535	0	535	0	530	0	535	0	0	534.167	0.561833
3.7143	0	535	0	535	0	530	0	535	0	535	0	535	0	535	0	535	0	535	0	535	0	530	0	535	0	0	534.167	0.561833
3.7252	0	535	0	535	0	530	0	535	0	535	0	535	0	535	0	535	0	535	0	535	0	530	0	535	0	0	534.167	0.561833
3.7361	0	535	0	535	0	530	0	535	0	535	0	535	0	535	0	535	0	535	0	535	0	530	0	535	0	0	534.167	0.561833
3.747	0	535	0	535	0	530	0	535	0	535	0	535	0	535	0	535	0	535	0	535	0	530	0	535	0	0	534.167	0.561833
3.7579	0	535	0	535	0	530	0	535	0	535	0	535	0	535	0	535	0	535	0	535	0	530	0	535	0	0	534.167	0.561833
3.7688	0	535	0	535	0	530	0	535	0	535	0	535	0	535	0	535	0	535	0	535	0	530	0	535	0	0	534.167	0.561833
3.7797	0	535	0	535	0	530	0	535	0	535	0	535	0	535	0	535	0	535	0	535	0	530	0	535	0	0	534.167	0.561833
3.7906	0	535	0	535	0	530	0	535	0	535	0	535	0	535	0	535	0	535	0	535	0	530	0	535	0	0	534.167	0.561833
3.8015	0	535	0	535	0	530	0	535	0	535	0	535	0	535	0	535	0	535	0	535	0	530	0	535	0	0	534.167	0.561833
3.8124	0	535	0	535	0	530	0	535	0	535	0	535	0	535	0	535	0	535	0	535	0	530	0	535	0	0	534.167	0.561833
3.8233	0	535	0	535	0	530	0	535	0	535	0	535	0	535	0	535	0	535	0	535	0	530	0	535	0	0	534.167	0.561833
3.8341	0	535	0	535	0	530	0	535	0	535	0	535	0	535	0	535	0	535	0	535	0	530	0	535	0	0	534.167	0.561833
3.845	0	535	0	535	0	530	0	535	0	535	0	535	0	535	0	535	0	535	0	535	0	530	0	535	0	0	534.167	0.561833
3.8559	0	535	0	535	0	530	0	535	0	535	0	535	0	535	0	535	0	535	0	535	0	530	0	535	0	0	534.167	0.561833
3.8668	0	535	0	535	0	530	0	535	0	535	0	535	0	535	0	535	0	535	0	535	0	530	0	535	0	0	534.167	0.561833
3.8777	0	535	0	535	0	530	0	535	0	535	0	535	0	535	0	535	0	535	0	535	0	530	0	535	0	0	534.167	0.561833
3.8886	0	535	0	535	0	530	0	535	0	535	0	535	0	535	0	535	0	535	0	535	0	530	0	535	0	0	534.167	0.561833
3.8995	0	535	0	535	0	530	0	535	0	535	0	535	0	535	0	535	0	535	0	535	0	530	0	535	0	0	534.167	0.561833
3.9104	0	535	0	535	0	530	0	535	0	535	0	535	0	535	0	535	0	535	0	535	0	530	0	535	0	0	534.167	0.561833
3.9213	0	535	0	535	0	530	0	535	0	535	0	535	0	535	0	535	0	535	0	535	0	530	0	535	0	0	534.167	0.561833
3.9322	0	535	0	535	0	530	0	535	0	535	0	535	0	535	0	535	0	535	0	535	0	530	0	535	0	0	534.167	0.561833
3.9431	0	535	0	535	0	530	0	535	0	535	0	535	0	535	0	535	0	535	0	535	0	530	0	535	0	0	534.167	0.561833
3.954	0	535	0	535	0	530	0	535	0	535	0	535	0	535	0	535	0	535	0	535	0	530	0	535	0	0	534.167	0.561833
3.9649	0	535	0	535	0	530	0	535	0	535	0	535	0	535	0	535	0	535	0	535	0	530	0	535	0	0	534.167	0.561833
3.9757	0	535	0	535	0	530	0	535	0	535	0	535	0	535	0	535	0	535	0	535	0	530	0	535	0	0	534.167	0.561833
3.9866	0	535	0	535	0	530	0	535	0	535	0	535	0	535	0	535	0	535	0	535	0	530	0	535	0	0	534.167	0.561833
3.9975	0	535	0	535	0	530	0	535	0	535	0	535	0	535	0	535	0	535	0	535	0	530	0	535	0	0	534.167	0.561833
4.0084	0	535	0	535	0	530	0	535	0	535	0	535	0	535	0	535	0	535	0	535	0	530	0	535	0	0	534.167	0.561833
4.0193	0	535	0	535	0	530	0	535	0	535	0	535	0	535	0	535	0	535	0	535	0	530	0	535	0	0	534.167	0.561833
4.0302	0	535	0	535	0	530	0	535	0	535	0	535	0	535	0	535	0	535	0	535	0	530	0	535	0	0	534.167	0.561833
4.0411	0	535	0	535	0	530	0	535	0	535	0	535	0	535	0	535	0	535	0	535	0	530	0	535	0	0	534.167	0.561833
4.052	0	535	0	535	0	530	0	535	0	535	0	535	0	535	0	535	0	535	0	535	0	530	0	535	0	0	534.167	0.561833
4.0629	0	535	0	535	0	530	0	535	0	535	0	535	0	535	0	535	0	535	0	535	0	530	0	535	0	0	534.167	0.561833
4.0738	0	535	0	535	0	530	0	535	0	535	0	535	0	535	0	535	0	535	0	535	0	530	0	535	0	0	534.167	0.561833
4.0847	0	535	0	535	0	530	0	535	0	535	0	535	0	535	0	535	0	535	0	535	0	530	0	535	0	0	534.167	0.561833
4.0956	0	535	0	535	0	530	0	535	0	535	0	535	0	535	0	535	0	535	0	535	0	530	0	535	0	0	534.167	0.561833
4.1065	0	535	0	535	0	530	0	535	0	535	0	535	0	535	0	535	0	535	0	535	0	530	0	535	0	0	534.167	0.561833
4.1174	0	535	0	535	0	530	0	535	0	535	0	535	0	535	0	535	0	535	0	535	0	530	0	535	0	0	534.167	0.561833
4.1282	0	535	0	535	0	530	0	535	0	535	0	535	0	535	0	535	0	535	0	535	0	530	0	535	0	0	534.167	0.561833
4.1391	0	535	0	535	0	530	0	535	0	535	0	535	0	535	0	535	0	535	0	535	0	530	0	535	0	0	534.167	0.561833
4.15	0	535	0	535	0	530	0	535	0	535	0	535	0	535	0	535	0	535	0	535	0	530	0	535	0	0	534.167	0.561833
4.1609	0	535	0	535	0	530	0	535	0	535	0	535	0	535	0	535	0	535	0	535	0	530	0	535	0	0	534.167	0.561833
4.1718	0	535	0	535	0	530	0	535	0	535	0	535	0	535	0	535	0	535	0	535	0	530	0	535	0	0	534.167	0.561833
4.1827	0	535	0	535	0	530	0	535	0	535	0	535	0	535	0	535	0	535	0	535	0	530	0	535	0	0	534.167	0.561833
4.1936	0	535	0	535	0	530	0	535	0	535	0	535	0	535	0	535	0	535	0	535	0	530	0	535	0	0	534.167	0.561833
4.2045	0	535	0	535	0	530	0	535	0	535	0	535	0	535	0	535	0	535	0	535	0	530	0	535	0	0	534.167	0.561833
4.2154	0	535	0	535	0	530	0	535	0	535	0	535	0	535	0	535	0	535	0	535	0	530	0	535	0	0	534.167	0.561833
4.2263	0	535	0	535	0	530	0	535	0	535	0	535	0	535	0	535	0	535	0	535	0	530	0	535	0	0	534.167	0.561833
4.2372	0	535	0	535	0	530	0	535	0	535	0	535	0	535	0	535	0	535	0	535	0	530	0	535	0	0	534.167	0.561833
4.2481	0	535	0	535	0	530	0	535	0	535	0	535	0	535	0	535	0	535	0	535	0	530	0	535	0	0	534.167	0.561833
4.259	0	535	0	535	0	530	0	535	0	535	0	535	0	535	0	535	0	535	0	535	0	530	0	535	0	0	534.167	0.561833
4.2698	0	535	0	535	0	530	0	535	0	535	0	535	0	535	0	535	0	535	0	535	0	530	0	535	0	0	534.167	0.561833
4.2807	0	535	0	535	0	530	0	535	0	535	0	535	0	535	0	535	0	535	0	535	0	530	0	535	0	0	534.167	0.561833
4.2916	0	535	0	535	0	530	0	535	0	535	0	535	0	535	0	535	0	535	0	535	0	530	0	535	0	0	534.167	0.561833
4.3025	0	535	0	535	0	530	0	535	0	535	0	535	0	535	0	535	0	535	0	535	0	530	0	535	0	0	534.167	0.561833
4.3134	0	535	0	535	0	530	0	535	0	535	0	535	0	535	0	535	0	535	0	535	0	530	0	535	0	0	534.167	0.561833
4.3243	0	535	0	535	0	530	0	535	0	535	0	535	0	535	0	535	0	535	0	535	0	530	0	535	0	0	534.167	0.561833
4.3352	0	535	0	535	0	530	0	535	0	535	0	535	0	535	0	535	0	535	0	535	0	530	0	535	0	0	534.167	0.561833
4.3461	0	535	0	535	0	530	0	535	0	535	0	535	0	535	0	535	0	535	0	535	0	530	0	535	0	0	534.167	0.561833
4.357	0	535	0	535	0	530	0	535	0	535	0	535	0	535	0	535	0	535	0	535	0	530	0	535	0	0	534.167	0.561833
4.3679	0	535	0	535	0	530	0	535	0	535	0	535	0	535	0	535	0	535	0	535	0	530	0	535	0	0	534.167	0.561833
4.3788	0	535	0	535	0	530	0	535	0	535	0	535	0	535	0	535	0	535	0	535	0	530	0	535	0	0	534.167	0.561833
4.3897	0	535	0	535	0	530	0	535	0	535	0	535	0	535	0	535	0	535	0	535	0	530	0	535	0	0	534.167	0.561833
4.4006	0	535	0	535	0	530	0	535	0	535	0	535	0	535	0	535	0	535	0	535	0	530	0	535	0	0	534.167	0.561833
4.4114	0	535	0	535	0	530	0	535	0	535	0	535	0	535	0	535	0	535	0	535	0	530	0	535	0	0	534.167	0.561833
4.4223	0	535	0	535	0	530	0	535	0	535	0	535	0	535	0	535	0	535	0	535	0	530	0	535	0	0	534.167	0.561833
4.4332	0	535	0	535	0	530	0	535	0	535	0	535	0	535	0	535	0	535	0	535	0	530	0	535	0	0	534.167	0.561833
4.4441	0	535	0	535	0	530	0	535	0	535	0	535	0	535	0	535	0	535	0	535	0	530	0	535	0	0	534.167	0.561833
4.455	0	535	0	535	0	530	0	535	0	535	0	535	0	535	0	535	0	535	0	535	0	530	0	535	0	0	534.167	0.561833
4.4659	0	535	0	535	0	530	0	535	0	535	0	535	0	535	0	535	0	535	0	535	0	530	0	535	0	0	534.167	0.561833
4.4768	0	535	0	535	0	530	0	535	0	535	0	535	0	535	0	535	0	535	0	535	0	530	0	535	0	0	534.167	0.561833
4.4877	0	535	0	535	0	530	0	535	0	535	0	535	0	535	0	535	0	535	0	535	0	530	0	535	0	0	534.167	0.561833
4.4986	0	535	0	535	0	530	0	535	0	535	0	535	0	535	0	535	0	535	0	535	0	530	0	535	0	0	534.167	0.561833
4.5095	0	535	0	535	0	530	0	535	0	535	0	535	0	535	0	535	0	535	0	535	0	530	0	535	0	0	534.167	0.561833
4.5204	0	535	0	535	0	530	0	535	0	535	0	535	0	535	0	535	0	535	0	535	0	530	0	535	0	0	534.167	0.561833
4.5313	0	535	0	535	0	530	0	535	0	535	0	535	0	535	0	535	0	535	0	535	0	530	0	535	0	0	534.167	0.561833
4.5422	0	535	0	535	0	530	0	535	0	535	0	535	0	535	0	535	0	535	0	535	0	530	0	535	0	0	534.167	0.561833
4.553	0	535	0	535	0	530	0	535	0	535	0	535	0	535	0	535	0	535	0	535	0	530	0	535	0	0	534.167	0.561833
4.5639	0	535	0	535	0	530	0	535	0	535	0	535	0	535	0	535	0	535	0	535	0	530	0	535	0	0	534.167	0.561833
4.5748	0	535	0	535	0	530	0	535	0	535	0	535	0	535	0	535	0	535	0	535	0	530	0	535	0	0	534.167	0.561833
4.5857	0	535	0	535	0	530	0	535	0	535	0	535	0	535	0	535	0	535	0	535	0	530	0	535	0	0	534.167	0.561833
4.5966	0	535	0	535	0	530	0	535	0	535	0	535	0	535	0	535	0	535	0	535	0	530	0	535	0	0	534.167	0.561833
4.6075	0	535	0	535	0	530	0	535	0	535	0	535	0	535	0	535	0	535	0	535	0	530	0	535	0	0	534.167	0.561833
4.6184	0	535	0	535	0	530	0	535	0	535	0	535	0	535	0	535	0	535	0	535	0	530	0	535	0	0	534.167	0.561833
4.6293	0	535	0	535	0	530	0	535	0	535	0	535	0	535	0	535	0	535	0	535	0	530	0	535	0	0	534.167	0.561833
4.6402	0	535	0	535	0	530	0	535	0	535	0	535	0	535	0	535	0	535	0	535	0	530	0	535	0	0	534.167	0.561833
4.6511	0	535	0	535	0	530	0	535	0	535	0	535	0	535	0	535	0	535	0	535	0	530	0	535	0	0	534.167	0.561833
4.662	0	535	0	535	0	530	0	535	0	535	0	535	0	535	0	535	0	535	0	535	0	530	0	535	0	0	534.167	0.561833
4.6729	0	535	0	535	0	530	0	535	0	535	0	535	0	535	0	535	0	535	0	535	0	530	0	535	0	0	534.167	0.561833
4.6838	0	535	0	535	0	530	0	535	0	535	0	535	0	535	0	535	0	535	0	535	0	530	0	535	0	0	534.167	0.561833
4.6947	0	535	0	535	0	530	0	535	0	535	0	535	0	535	0	535	0	535	0	535	0	530	0	535	0	0	534.167	0.561833
4.7055	0	535	0	535	0	530	0	535	0	535	0	535	0	535	0	535	0	535	0	535	0	530	0	535	0	0	534.167	0.561833
4.7164	0	535	0	535	0	530	0	535	0	535	0	535	0	535	0	535	0	535	0	535	0	530	0	535	0	0	534.167	0.561833
4.7273	0	535	0	535	0	530	0	535	0	535	0	535	0	535	0	535	0	535	0	535	0	530	0	535	0	0	534.167	0.561833
4.7382	0	535	0	535	0	530	0	535	0	535	0	535	0	535	0	535	0	535	0	535	0	530	0	535	0	0	534.167	0.561833
4.7491	0	535	0	535	0	530	0	535	0	535	0	535	0	535	0	535	0	535	0	535	0	530	0	535	0	0	534.167	0.561833
4.76	0	535	0	535	0	530	0	535	0	535	0	535	0	535	0	535	0	535	0	535	0	530	0	535	0	0	534.167	0.561833
4.7709	0	535	0	535	0	530	0	535	0	535	0	535	0	535	0	535	0	535	0	535	0	530	0	535	0	0	534.167	0.561833
4.7818	0	535	0	535	0	530	0	535	0	535	0	535	0	535	0	535	0	535	0	535	0	530	0	535	0	0	534.167	0.561833
4.7927	0	535	0	535	0	530	0	535	0	535	0	535	0	535	0	535	0	535	0	535	0	530	0	535	0	0	534.167	0.561833
4.8036	0	535	0	535	0	530	0	535	0	535	0	535	0	535	0	535	0	535	0	535	0	530	0	535	0	0	534.167	0.561833
4.8145	0	535	0	535	0	530	0	535	0	535	0	535	0	535	0	535	0	535	0	535	0	530	0	535	0	0	534.167	0.561833
4.8254	0	535	0	535	0	530	0	535	0	535	0	535	0	535	0	535	0	535	0	535	0	530	0	535	0	0	534.167	0.561833
4.8363	0	535	0	535	0	530	0	535	0	535	0	535	0	535	0	535	0	535	0	535	0	530	0	535	0	0	534.167	0.561833
4.8471	0	535	0	535	0	530	0	535	0	535	0	535	0	535	0	535	0	535	0	535	0	530	0	535	0	0	534.167	0.561833
4.858	0	535	0	535	0	530	0	535	0	535	0	535	0	535	0	535	0	535	0	535	0	530	0	535	0	0	534.167	0.561833
4.8689	0	535	0	535	0	530	0	535	0	535	0	535	0	535	0	535	0	535	0	535	0	530	0	535	0	0	534.167	0.561833
4.8798	0	535	0	535	0	530	0	535	0	535	0	535	0	535	0	535	0	535	0	535	0	530	0	535	0	0	534.167	0.561833
4.8907	0	535	0	535	0	530	0	535	0	535	0	535	0	535	0	535	0	535	0	535	0	530	0	535	0	0	534.167	0.561833
4.9016	0	535	0	535	0	530	0	535	0	535	0	535	0	535	0	535	0	535	0	535	0	530	0	535	0	0	534.167	0.561833
4.9125	0	535	0	535	0	530	0	535	0	535	0	535	0	535	0	535	0	535	0	535	0	530	0	535	0	0	534.167	0.561833
4.9234	0	535	0	535	0	530	0	535	0	535	0	535	0	535	0	535	0	535	0	535	0	530	0	535	0	0	534.167	0.561833
4.9343	0	535	0	535	0	530	0	535	0	535	0	535	0	535	0	535	0	535	0	535	0	530	0	535	0	0	534.167	0.561833
4.9452	0	535	0	535	0	530	0	535	0	535	0	535	0	535	0	535	0	535	0	535	0	530	0	535	0	0	534.167	0.561833
4.9561	0	535	0	535	0	530	0	535	0	535	0	535	0	535	0	535	0	535	0	535	0	530	0	535	0	0	534.167	0.561833
4.967	0	535	0	535	0	530	0	535	0	535	0	535	0	535	0	535	0	535	0	535	0	530	0	535	0	0	534.167	0.561833
4.9779	0	535	0	535	0	530	0	535	0	535	0	535	0	535	0	535	0	535	0	535	0	530	0	535	0	0	534.167	0.561833
4.9887	0	535	0	535	0	530	0	535	0	535	0	535	0	535	0	535	0	535	0	535	0	530	0	535	0	0	534.167	0.561833
4.9996	0	535	0	535	0	530	0	535	0	535	0	535	0	535	0	535	0	535	0	535	0	530	0	535	0	0	534.167	0.561833
5.0105	0	535	0	535	0	530	0	535	0	535	0	535	0	535	0	535	0	535	0	535	0	530	0	535	0	0	534.167	0.561833
5.0214	0	535	0	535	0	530	0	535	0	535	0	535	0	535	0	535	0	535	0	535	0	530	0	535	0	0	534.167	0.561833
5.0323	0	535	0	535	0	530	0	535	0	535	0	535	0	535	0	535	0	535	0	535	0	530	0	535	0	0	534.167	0.561833
5.0432	0	535	0	535	0	530	0	535	0	535	0	535	0	535	0	535	0	535	0	535	0	530	0	535	0	0	534.167	0.561833
5.0541	0	535	0	535	0	530	0	535	0	535	0	535	0	535	0	535	0	535	0	535	0	530	0	535	0	0	534.167	0.561833
5.065	0	535	0	535	0	530	0	535	0	535	0	535	0	535	0	535	0	535	0	535	0	530	0	535	0	0	534.167	0.561833
5.0759	0	535	0	535	0	530	0	535	0	535	0	535	0	535	0	535	0	535	0	535	0	530	0	535	0	0	534.167	0.561833
5.0868	0	535	0	535	0	530	0	535	0	535	0	535	0	535	0	535	0	535	0	535	0	530	0	535	0	0	534.167	0.561833
5.0977	0	535	0	535	0	530	0	535	0	535	0	535	0	535	0	535	0	535	0	535	0	530	0	535	0	0	534.167	0.561833
5.1086	0	535	0	535	0	530	0	535	0	535	0	535	0	535	0	535	0	535	0	535	0	530	0	535	0	0	534.167	0.561833
5.1195	0	535	0	535	0	530	0	535	0	535	0	535	0	535	0	535	0	535	0	535	0	530	0	535	0	0	534.167	0.561833
5.1303	0	535	0	535	0	530	0	535	0	535	0	535	0	535	0	535	0	535	0	535	0	530	0	535	0	0	534.167	0.561833
5.1412	0	535	0	535	0	530	0	535	0	535	0	535	0	535	0	535	0	535	0	535	0	530	0	535	0	0	534.167	0.561833
5.1521	0	535	0	535	0	530	0	535	0	535	0	535	0	535	0	535	0	535	0	535	0	530	0	535	0	0	534.167	0.561833
5.163	0	535	0	535	0	530	0	535	0	535	0	535	0	535	0	535	0	535	0	535	0	530	0	535	0	0	534.167	0.561833
5.1739	0	535	0	535	0	530	0	535	0	535	0	535	0	535	0	535	0	535	0	535	0	530	0	535	0	0	534.167	0.561833
5.1848	0	535	0	535	0	530	0	535	0	535	0	535	0	535	0	535	0	535	0	535	0	530	0	535	0	0	534.167	0.561833
5.1957	0	535	0	535	0	530	0	535	0	535	0	535	0	535	0	535	0	535	0	535	0	530	0	535	0	0	534.167	0.561833
5.2066	0	535	0	535	0	530	0	535	0	535	0	535	0	535	0	535	0	535	0	535	0	530	0	535	0	0	534.167	0.561833
5.2175	0	535	0	535	0	530	0	535	0	535	0	535	0	535	0	535	0	535	0	535	0	530	0	535	0	0	534.167	0.561833
5.2284	0	535	0	535	0	530	0	535	0	535	0	535	0	535	0	535	0	535	0	535	0	530	0	535	0	0	534.167	0.561833
5.2393	0	535	0	535	0	530	0	535	0	535	0	535	0	535	0	535	0	535	0	535	0	530	0	535	0	0	534.167	0.561833
5.2502	0	535	0	535	0	530	0	535	0	535	0	535	0	535	0	535	0	535	0	535	0	530	0	535	0	0	534.167	0.561833
5.2611	0	535	0	535	0	530	0	535	0	535	0	535	0	535	0	535	0	535	0	535	0	530	0	535	0	0	534.167	0.561833
5.272	0	535	0	535	0	530	0	535	0	535	0	535	0	535	0	535	0	535	0	535	0	530	0	535	0	0	534.167	0.561833
5.2828	0	535	0	535	0	530	0	535	0	535	0	535	0	535	0	535	0	535	0	535	0	530	0	535	0	0	534.167	0.561833
5.2937	0	535	0	535	0	530	0	535	0	535	0	535	0	535	0	535	0	535	0	535	0	530	0	535	0	0	534.167	0.561833
5.3046	0	535	0	535	0	530	0	535	0	535	0	535	0	535	0	535	0	535	0	535	0	530	0	535	0	0	534.167	0.561833
5.3155	0	535	0	535	0	530	0	535	0	535	0	535	0	535	0	535	0	535	0	535	0	530	0	535	0	0	534.167	0.561833
5.3264	0	535	0	535	0	530	0	535	0	535	0	535	0	535	0	535	0	535	0	535	0	530	0	535	0	0	534.167	0.561833
5.3373	0	535	0	535	0	530	0	535	0	535	0	535	0	535	0	535	0	535	0	535	0	530	0	535	0	0	534.167	0.561833
5.3482	0	535	0	535	0	530	0	535	0	535	0	535	0	535	0	535	0	535	0	535	0	530	0	535	0	0	534.167	0.561833
5.3591	0	535	0	535	0	530	0	535	0	535	0	535	0	535	0	535	0	535	0	535	0	530	0	535	0	0	534.167	0.561833
5.37	0	535	0	535	0	530	0	535	0	535	0	535	0	535	0	535	0	535	0	535	0	530	0	535	0	0	534.167	0.561833
5.3809	0	535	0	535	0	530	0	535	0	535	0	535	0	535	0	535	0	535	0	535	0	530	0	535	0	0	534.167	0.561833
5.3918	0	535	0	535	0	530	0	535	0	535	0	535	0	535	0	535	0	535	0	535	0	530	0	535	0	0	534.167	0.561833
5.4027	0	535	0	535	0	530	0	535	0	535	0	535	0	535	0	535	0	535	0	535	0	530	0	535	0	0	534.167	0.561833
5.4136	0	535	0	535	0	530	0	535	0	535	0	535	0	535	0	535	0	535	0	535	0	530	0	535	0	0	534.167	0.561833
5.4244	0	535	0	535	0	530	0	535	0	535	0	535	0	535	0	535	0	535	0	535	0	530	0	535	0	0	534.167	0.561833
5.4353	0	535	0	535	0	530	0	535	0	535	0	535	0	535	0	535	0	535	0	535	0	530	0	535	0	0	534.167	0.561833
5.4462	0	535	0	535	0	530	0	535	0	535	0	535	0	535	0	535	0	535	0	535	0	530	0	535	0	0	534.167	0.561833
5.4571	0	535	0	535	0	530	0	535	0	535	0	535	0	535	0	535	0	535	0	535	0	530	0	535	0	0	534.167	0.561833
5.468	0	535	0	535	0	530	0	535	0	535	0	535	0	535	0	535	0	535	0	535	0	530	0	535	0	0	534.167	0.561833
5.4789	0	535	0	535	0	530	0	535	0	535	0	535	0	535	0	535	0	535	0	535	0	530	0	535	0	0	534.167	0.561833
5.4898	0	535	0	535	0	530	0	535	0	535	0	535	0	535	0	535	0	535	0	535	0	530	0	535	0	0	534.167	0.561833
5.5007	0	535	0	535	0	530	0	535	0	535	0	535	0	535	0	535	0	535	0	535	0	530	0	535	0	0	534.167	0.561833
5.5116	0	535	0	535	0	530	0	535	0	535	0	535	0	535	0	535	0	535	0	535	0	530	0	535	0	0	534.167	0.561833
5.5225	0	535	0	535	0	530	0	535	0	535	0	535	0	535	0	535	0	535	0	535	0	530	0	535	0	0	534.167	0.561833
5.5334	0	535	0	535	0	530	0	535	0	535	0	535	0	535	0	535	0	535	0	535	0	530	0	535	0	0	534.167	0.561833
5.5443	0	535	0	535	0	530	0	535	0	535	0	535	0	535	0	535	0	535	0	535	0	530	0	535	0	0	534.167	0.561833
5.5552	0	535	0	535	0	530	0	535	0	535	0	535	0	535	0	535	0	535	0	535	0	530	0	535	0	0	534.167	0.561833
5.566	0	535	0	535	0	530	0	535	0	535	0	535	0	535	0	535	0	535	0	535	0	530	0	535	0	0	534.167	0.561833
5.5769	0	535	0	535	0	530	0	535	0	535	0	535	0	535	0	535	0	535	0	535	0	530	0	535	0	0	534.167	0.561833
5.5878	0	535	0	535	0	530	0	535	0	535	0	535	0	535	0	535	0	535	0	535	0	530	0	535	0	0	534.167	0.561833
5.5987	0	535	0	535	0	530	0	535	0	535	0	535	0	535	0	535	0	535	0	535	0	530	0	535	0	0	534.167	0.561833
5.6096	0	535	0	535	0	530	0	535	0	535	0	535	0	535	0	535	0	535	0	535	0	530	0	535	0	0	534.167	0.561833
5.6205	0	535	0	535	0	530	0	535	0	535	0	535	0	535	0	535	0	535	0	535	0	530	0	535	0	0	534.167	0.561833
5.6314	0	535	0	535	0	530	0	535	0	535	0	535	0	535	0	535	0	535	0	535	0	530	0	535	0	0	534.167	0.561833
5.6423	0	535	0	535	0	530	0	535	0	535	0	535	0	535	0	535	0	535	0	535	0	530	0	535	0	0	534.167	0.561833
5.6532	0	535	0	535	0	530	0	535	0	535	0	535	0	535	0	535	0	535	0	535	0	530	0	535	0	0	534.167	0.561833
5.6641	0	535	0	535	0	530	0	535	0	535	0	535	0	535	0	535	0	535	0	535	0	530	0	535	0	0	534.167	0.561833
5.675	0	535	0	535	0	530	0	535	0	535	0	535	0	535	0	535	0	535	0	535	0	530	0	535	0	0	534.167	0.561833
5.6859	0	535	0	535	0	530	0	535	0	535	0	535	0	535	0	535	0	535	0	535	0	530	0	535	0	0	534.167	0.561833
5.6968	0	535	0	535	0	530	0	535	0	535	0	535	0	535	0	535	0	535	0	535	0	530	0	535	0	0	534.167	0.561833
5.7076	0	535	0	535	0	530	0	535	0	535	0	535	0	535	0	535	0	535	0	535	0	530	0	535	0	0	534.167	0.561833
5.7185	0	535	0	535	0	530	0	535	0	535	0	535	0	535	0	535	0	535	0	535	0	530	0	535	0	0	534.167	0.561833
5.7294	0	535	0	535	0	530	0	535	0	535	0	535	0	535	0	535	0	535	0	535	0	530	0	535	0	0	534.167	0.561833
5.7403	0	535	0	535	0	530	0	535	0	535	0	535	0	535	0	535	0	535	0	535	0	530	0	535	0	0	534.167	0.561833
5.7512	0	535	0	535	0	530	0	535	0	535	0	535	0	535	0	535	0	535	0	535	0	530	0	535	0	0	534.167	0.561833
5.7621	0	535	0	535	0	530	0	535	0	535	0	535	0	535	0	535	0	535	0	535	0	530	0	535	0	0	534.167	0.561833
5.773	0	535	0	535	0	530	0	535	0	535	0	535	0	535	0	535	0	535	0	535	0	530	0	535	0	0	534.167	0.561833
5.7839	0	535	0	535	0	530	0	535	0	535	0	535	0	535	0	535	0	535	0	535	0	530	0	535	0	0	534.167	0.561833
5.7948	0	535	0	535	0	530	0	535	0	535	0	535	0	535	0	535	0	535	0	535	0	530	0	535	0	0	534.167	0.561833
5.8057	0	535	0	535	0	530	0	535	0	535	0	535	0	535	0	535	0	535	0	535	0	530	0	535	0	0	534.167	0.561833
5.8166	0	535	0	535	0	530	0	535	0	535	0	535	0	535	0	535	0	535	0	535	0	530	0	535	0	0	534.167	0.561833
5.8275	0	535	0	535	0	530	0	535	0	535	0	535	0	535	0	535	0	535	0	535	0	530	0	535	0	0	534.167	0.561833
5.8384	0	535	0	535	0	530	0	535	0	535	0	535	0	535	0	535	0	535	0	535	0	530	0	535	0	0	534.167	0.561833
5.8493	0	535	0	535	0	530	0	535	0	535	0	535	0	535	0	535	0	535	0	535	0	530	0	535	0	0	534.167	0.561833
5.8601	0	535	0	535	0	530	0	535	0	535	0	535	0	535	0	535	0	535	0	535	0	530	0	535	0	0	534.167	0.561833
5.871	0	535	0	535	0	530	0	535	0	535	0	535	0	535	0	535	0	535	0	535	0	530	0	535	0	0	534.167	0.561833
5.8819	0	535	0	535	0	530	0	535	0	535	0	535	0	535	0	535	0	535	0	535	0	530	0	535	0	0	534.167	0.561833
5.8928	0	535	0	535	0	530	0	535	0	535	0	535	0	535	0	535	0	535	0	535	0	530	0	535	0	0	534.167	0.561833
5.9037	0	535	0	535	0	530	0	535	0	535	0	535	0	535	0	535	0	535	0	535	0	530	0	535	0	0	534.167	0.561833
5.9146	0	535	0	535	0	530	0	535	0	535	0	535	0	535	0	535	0	535	0	535	0	530	0	535	0	0	534.167	0.561833
5.9255	0	535	0	535	0	530	0	535	0	535	0	535	0	535	0	535	0	535	0	535	0	530	0	535	0	0	534.167	0.561833
5.9364	0	535	0	535	0	530	0	535	0	535	0	535	0	535	0	535	0	535	0	535	0	530	0	535	0	0	534.167	0.561833
5.9473	0	535	0	535	0	530	0	535	0	535	0	535	0	535	0	535	0	535	0	535	0	530	0	535	0	0	534.167	0.561833
5.9582	0	535	0	535	0	530	0	535	0	535	0	535	0	535	0	535	0	535	0	535	0	530	0	535	0	0	534.167	0.561833
5.9691	0	535	0	535	0	530	0	535	0	535	0	535	0	535	0	535	0	535	0	535	0	530	0	535	0	0	534.167	0.561833
5.98	0	535	0	535	0	530	0	535	0	535	0	535	0	535	0	535	0	535	0	535	0	530	0	535	0	0	534.167	0.561833
5.9909	0	535	0	535	0	530	0	535	0	535	0	535	0	535	0	535	0	535	0	535	0	530	0	535	0	0	534.167	0.561833
6.0017	0	535	0	535	0	530	0	535	0	535	0	535	0	535	0	535	0	535	0	535	0	530	0	535	0	0	534.167	0.561833
6.0126	0	535	0	535	0	530	0	535	0	535	0	535	0	535	0	535	0	535	0	535	0	530	0	535	0	0	534.167	0.561833
6.0235	0	535	0	535	0	530	0	535	0	535	0	535	0	535	0	535	0	535	0	535	0	530	0	535	0	0	534.167	0.561833
6.0344	0	535	0	535	0	530	0	535	0	535	0	535	0	535	0	535	0	535	0	535	0	530	0	535	0	0	534.167	0.561833
6.0453	0	535	0	535	0	530	0	535	0	535	0	535	0	535	0	535	0	535	0	535	0	530	0	535	0	0	534.167	0.561833
6.0562	0	535	0	535	0	530	0	535	0	535	0	535	0	535	0	535	0	535	0	535	0	530	0	535	0	0	534.167	0.561833
6.0671	0	535	0	535	0	530	0	535	0	535	0	535	0	535	0	535	0	535	0	535	0	530	0	535	0	0	534.167	0.561833
6.078	0	535	0	535	0	530	0	535	0	535	0	535	0	535	0	535	0	535	0	535	0	530	0	535	0	0	534.167	0.561833
6.0889	0	535	0	535	0	530	0	535	0	535	0	535	0	535	0	535	0	535	0	535	0	530	0	535	0	0	534.167	0.561833
6.0998	0	535	0	535	0	530	0	535	0	535	0	535	0	535	0	535	0	535	0	535	0	530	0	535	0	0	534.167	0.561833
6.1107	0	535	0	535	0	530	0	535	0	535	0	535	0	535	0	535	0	535	0	535	0	530	0	535	0	0	534.167	0.561833
6.1216	0	535	0	535	0	530	0	535	0	535	0	535	0	535	0	535	0	535	0	535	0	530	0	535	0	0	534.167	0.561833
6.1325	0	535	0	535	0	530	0	535	0	535	0	535	0	535	0	535	0	535	0	535	0	530	0	535	0	0	534.167	0.561833
6.1433	0	535	0	535	0	530	0	535	0	535	0	535	0	535	0	535	0	535	0	535	0	530	0	535	0	0	534.167	0.561833
6.1542	0	535	0	535	0	530	0	535	0	535	0	535	0	535	0	535	0	535	0	535	0	530	0	535	0	0	534.167	0.561833
6.1651	0	535	0	535	0	530	0	535	0	535	0	535	0	535	0	535	0	535	0	535	0	530	0	535	0	0	534.167	0.561833
6.176	0	535	0	535	0	530	0	535	0	535	0	535	0	535	0	535	0	535	0	535	0	530	0	535	0	0	534.167	0.561833
6.1869	0	535	0	535	0	530	0	535	0	535	0	535	0	535	0	535	0	535	0	535	0	530	0	535	0	0	534.167	0.561833
6.1978	0	535	0	535	0	530	0	535	0	535	0	535	0	535	0	535	0	535	0	535	0	530	0	535	0	0	534.167	0.561833
6.2087	0	535	0	535	0	530	0	535	0	535	0	535	0	535	0	535	0	535	0	535	0	530	0	535	0	0	534.167	0.561833
6.2196	0	535	0	535	0	530	0	535	0	535	0	535	0	535	0	535	0	535	0	535	0	530	0	535	0	0	534.167	0.561833
6.2305	0	535	0	535	0	530	0	535	0	535	0	535	0	535	0	535	0	535	0	535	0	530	0	535	0	0	534.167	0.561833
6.2414	0	535	0	535	0	530	0	535	0	535	0	535	0	535	0	535	0	535	0	535	0	530	0	535	0	0	534.167	0.561833
6.2523	0	535	0	535	0	530	0	535	0	535	0	535	0	535	0	535	0	535	0	535	0	530	0	535	0	0	534.167	0.561833
6.2632	0	535	0	535	0	530	0	535	0	535	0	535	0	535	0	535	0	535	0	535	0	530	0	535	0	0	534.167	0.561833
6.2741	0	535	0	535	0	530	0	535	0	535	0	535	0	535	0	535	0	535	0	535	0	530	0	535	0	0	534.167	0.561833
6.2849	0	535	0	535	0	530	0	535	0	535	0	535	0	535	0	535	0	535	0	535	0	530	0	535	0	0	534.167	0.561833
6.2958	0	535	0	535	0	530	0	535	0	535	0	535	0	535	0	535	0	535	0	535	0	530	0	535	0	0	534.167	0.561833
6.3067	0	535	0	535	0	530	0	535	0	535	0	535	0	535	0	535	0	535	0	535	0	530	0	535	0	0	534.167	0.561833
6.3176	0	535	0	535	0	530	0	535	0	535	0	535	0	535	0	535	0	535	0	535	0	530	0	535	0	0	534.167	0.561833
6.3285	0	535	0	535	0	530	0	535	0	535	0	535	0	535	0	535	0	535	0	535	0	530	0	535	0	0	534.167	0.561833
6.3394	0	535	0	535	0	530	0	535	0	535	0	535	0	535	0	535	0	535	0	535	0	530	0	535	0	0	534.167	0.561833
6.3503	0	535	0	535	0	530	0	535	0	535	0	535	0	535	0	535	0	535	0	535	0	530	0	535	0	0	534.167	0.561833
6.3612	0	535	0	535	0	530	0	535	0	535	0	535	0	535	0	535	0	535	0	535	0	530	0	535	0	0	534.167	0.561833
6.3721	0	535	0	535	0	530	0	535	0	535	0	535	0	535	0	535	0	535	0	535	0	530	0	535	0	0	534.167	0.561833
6.383	0	535	0	535	0	530	0	535	0	535	0	535	0	535	0	535	0	535	0	535	0	530	0	535	0	0	534.167	0.561833
6.3939	0	535	0	535	0	530	0	535	0	535	0	535	0	535	0	535	0	535	0	535	0	530	0	535	0	0	534.167	0.561833
6.4048	0	535	0	535	0	530	0	535	0	535	0	535	0	535	0	535	0	535	0	535	0	530	0	535	0	0	534.167	0.561833
6.4157	0	535	0	535	0	530	0	535	0	535	0	535	0	535	0	535	0	535	0	535	0	530	0	535	0	0	534.167	0.561833
6.4266	0	535	0	535	0	530	0	535	0	535	0	535	0	535	0	535	0	535	0	535	0	530	0	535	0	0	534.167	0.561833
6.4374	0	535	0	535	0	530	0	535	0	535	0	535	0	535	0	535	0	535	0	535	0	530	0	535	0	0	534.167	0.561833
6.4483	0	535	0	535	0	530	0	535	0	535	0	535	0	535	0	535	0	535	0	535	0	530	0	535	0	0	534.167	0.561833
6.4592	0	535	0	535	0	530	0	535	0	535	0	535	0	535	0	535	0	535	0	535	0	530	0	535	0	0	534.167	0.561833
6.4701	0	535	0	535	0	530	0	535	0	535	0	535	0	535	0	535	0	535	0	535	0	530	0	535	0	0	534.167	0.561833
6.481	0	535	0	535	0	530	0	535	0	535	0	535	0	535	0	535	0	535	0	535	0	530	0	535	0	0	534.167	0.561833
6.4919	0	535	0	535	0	530	0	535	0	535	0	535	0	535	0	535	0	535	0	535	0	530	0	535	0	0	534.167	0.561833
6.5028	0	535	0	535	0	530	0	535	0	535	0	535	0	535	0	535	0	535	0	535	0	530	0	535	0	0	534.167	0.561833
6.5137	0	535	0	535	0	530	0	535	0	535	0	535	0	535	0	535	0	535	0	535	0	530	0	535	0	0	534.167	0.561833
6.5246	0	535	0	535	0	530	0	535	0	535	0	535	0	535	0	535	0	535	0	535	0	530	0	535	0	0	534.167	0.561833
6.5355	0	535	0	535	0	530	0	535	0	535	0	535	0	535	0	535	0	535	0	535	0	530	0	535	0	0	534.167	0.561833
6.5464	0	535	0	535	0	530	0	535	0	535	0	535	0	535	0	535	0	535	0	535	0	530	0	535	0	0	534.167	0.561833
6.5573	0	535	0	535	0	530	0	535	0	535	0	535	0	535	0	535	0	535	0	535	0	530	0	535	0	0	534.167	0.561833
6.5682	0	535	0	535	0	530	0	535	0	535	0	535	0	535	0	535	0	535	0	535	0	530	0	535	0	0	534.167	0.561833
6.579	0	535	0	535	0	530	0	535	0	535	0	535	0	535	0	535	0	535	0	535	0	530	0	535	0	0	534.167	0.561833
6.5899	0	535	0	535	0	530	0	535	0	535	0	535	0	535	0	535	0	535	0	535	0	530	0	535	0	0	534.167	0.561833
6.6008	0	535	0	535	0	530	0	535	0	535	0	535	0	535	0	535	0	535	0	535	0	530	0	535	0	0	534.167	0.561833
6.6117	0	535	0	535	0	530	0	535	0	535	0	535	0	535	0	535	0	535	0	535	0	530	0	535	0	0	534.167	0.561833
6.6226	0	535	0	535	0	530	0	535	0	535	0	535	0	535	0	535	0	535	0	535	0	530	0	535	0	0	534.167	0.561833
6.6335	0	535	0	535	0	530	0	535	0	535	0	535	0	535	0	535	0	535	0	535	0	530	0	535	0	0	534.167	0.561833
6.6444	0	535	0	535	0	530	0	535	0	535	0	535	0	535	0	535	0	535	0	535	0	530	0	535	0	0	534.167	0.561833
6.6553	0	535	0	535	0	530	0	535	0	535	0	535	0	535	0	535	0	535	0	535	0	530	0	535	0	0	534.167	0.561833
6.6662	0	535	0	535	0	530	0	535	0	535	0	535	0	535	0	535	0	535	0	535	0	530	0	535	0	0	534.167	0.561833
6.6771	0	535	0	535	0	530	0	535	0	535	0	535	0	535	0	535	0	535	0	535	0	530	0	535	0	0	534.167	0.561833
6.688	0	535	0	535	0	530	0	535	0	535	0	535	0	535	0	535	0	535	0	535	0	530	0	535	0	0	534.167	0.561833
6.6989	0	535	0	535	0	530	0	535	0	535	0	535	0	535	0	535	0	535	0	535	0	530	0	535	0	0	534.167	0.561833
6.7098	0	535	0	535	0	530	0	535	0	535	0	535	0	535	0	535	0	535	0	535	0	530	0	535	0	0	534.167	0.561833
6.7206	0	535	0	535	0	530	0	535	0	535	0	535	0	535	0	535	0	535	0	535	0	530	0	535	0	0	534.167	0.561833
6.7315	0	535	0	535	0	530	0	535	0	535	0	535	0	535	0	535	0	535	0	535	0	530	0	535	0	0	534.167	0.561833
6.7424	0	535	0	535	0	530	0	535	0	535	0	535	0	535	0	535	0	535	0	535	0	530	0	535	0	0	534.167	0.561833
6.7533	0	535	0	535	0	530	0	535	0	535	0	535	0	535	0	535	0	535	0	535	0	530	0	535	0	0	534.167	0.561833
6.7642	0	535	0	535	0	530	0	535	0	535	0	535	0	535	0	535	0	535	0	535	0	530	0	535	0	0	534.167	0.561833
6.7751	0	535	0	535	0	530	0	535	0	535	0	535	0	535	0	535	0	535	0	535	0	530	0	535	0	0	534.167	0.561833
6.786	0	535	0	535	0	530	0	535	0	535	0	535	0	535	0	535	0	535	0	535	0	530	0	535	0	0	534.167	0.561833
6.7969	0	535	0	535	0	530	0	535	0	535	0	535	0	535	0	535	0	535	0	535	0	530	0	535	0	0	534.167	0.561833
6.8078	0	535	0	535	0	530	0	535	0	535	0	535	0	535	0	535	0	535	0	535	0	530	0	535	0	0	534.167	0.561833
6.8187	0	535	0	535	0	530	0	535	0	535	0	535	0	535	0	535	0	535	0	535	0	530	0	535	0	0	534.167	0.561833
6.8296	0	535	0	535	0	530	0	535	0	535	0	535	0	535	0	535	0	535	0	535	0	530	0	535	0	0	534.167	0.561833
6.8405	0	535	0	535	0	530	0	535	0	535	0	535	0	535	0	535	0	535	0	535	0	530	0	535	0	0	534.167	0.561833
6.8514	0	535	0	535	0	530	0	535	0	535	0	535	0	535	0	535	0	535	0	535	0	530	0	535	0	0	534.167	0.561833
6.8622	0	535	0	535	0	530	0	535	0	535	0	535	0	535	0	535	0	535	0	535	0	530	0	535	0	0	534.167	0.561833
6.8731	0	535	0	535	0	530	0	535	0	535	0	535	0	535	0	535	0	535	0	535	0	530	0	535	0	0	534.167	0.561833
6.884	0	535	0	535	0	530	0	535	0	535	0	535	0	535	0	535	0	535	0	535	0	530	0	535	0	0	534.167	0.561833
6.8949	0	535	0	535	0	530	0	535	0	535	0	535	0	535	0	535	0	535	0	535	0	530	0	535	0	0	534.167	0.561833
6.9058	0	535	0	535	0	530	0	535	0	535	0	535	0	535	0	535	0	535	0	535	0	530	0	535	0	0	534.167	0.561833
6.9167	0	535	0	535	0	530	0	535	0	535	0	535	0	535	0	535	0	535	0	535	0	530	0	535	0	0	534.167	0.561833
6.9276	0	535	0	535	0	530	0	535	0	535	0	535	0	535	0	535	0	535	0	535	0	530	0	535	0	0	534.167	0.561833
6.9385	0	535	0	535	0	530	0	535	0	535	0	535	0	535	0	535	0	535	0	535	0	530	0	535	0	0	534.167	0.561833
6.9494	0	535	0	535	0	530	0	535	0	535	0	535	0	535	0	535	0	535	0	535	0	530	0	535	0	0	534.167	0.561833
6.9603	0	535	0	535	0	530	0	535	0	535	0	535	0	535	0	535	0	535	0	535	0	530	0	535	0	0	534.167	0.561833
6.9712	0	535	0	535	0	530	0	535	0	535	0	535	0	535	0	535	0	535	0	535	0	530	0	535	0	0	534.167	0.561833
6.9821	0	535	0	535	0	530	0	535	0	535	0	535	0	535	0	535	0	535	0	535	0	530	0	535	0	0	534.167	0.561833
6.993	0	535	0	535	0	530	0	535	0	535	0	535	0	535	0	535	0	535	0	535	0	530	0	535	0	0	534.167	0.561833
7.0039	0	535	0	535	0	530	0	535	0	535	0	535	0	535	0	535	0	535	0	535	0	530	0	535	0	0	534.167	0.561833
7.0147	0	535	0	535	0	530	0	535	0	535	0	535	0	535	0	535	0	535	0	535	0	530	0	535	0	0	534.167	0.561833
7.0256	0	535	0	535	0	530	0	535	0	535	0	535	0	535	0	535	0	535	0	535	0	530	0	535	0	0	534.167	0.561833
7.0365	0	535	0	535	0	530	0	535	0	535	0	535	0	535	0	535	0	535	0	535	0	530	0	535	0	0	534.167	0.561833
7.0474	0	535	0	535	0	530	0	535	0	535	0	535	0	535	0	535	0	535	0	535	0	530	0	535	0	0	534.167	0.561833
7.0583	0	535	0	535	0	530	0	535	0	535	0	535	0	535	0	535	0	535	0	535	0	530	0	535	0	0	534.167	0.561833
7.0692	0	535	0	535	0	530	0	535	0	535	0	535	0	535	0	535	0	535	0	535	0	530	0	535	0	0	534.167	0.561833
7.0801	0	535	0	535	0	530	0	535	0	535	0	535	0	535	0	535	0	535	0	535	0	530	0	535	0	0	534.167	0.561833
7.091	0	535	0	535	0	530	0	535	0	535	0	535	0	535	0	535	0	535	0	535	0	530	0	535	0	0	534.167	0.561833
7.1019	0	535	0	535	0	530	0	535	0	535	0	535	0	535	0	535	0	535	0	535	0	530	0	535	0	0	534.167	0.561833
7.1128	0	535	0	535	0	530	0	535	0	535	0	535	0	535	0	535	0	535	0	535	0	530	0	535	0	0	534.167	0.561833
7.1237	0	535	0	535	0	530	0	535	0	535	0	535	0	535	0	535	0	535	0	535	0	530	0	535	0	0	534.167	0.561833
7.1346	0	535	0	535	0	530	0	535	0	535	0	535	0	535	0	535	0	535	0	535	0	530	0	535	0	0	534.167	0.561833
7.1455	0	535	0	535	0	530	0	535	0	535	0	535	0	535	0	535	0	535	0	535	0	530	0	535	0	0	534.167	0.561833
7.1563	0	535	0	535	0	530	0	535	0	535	0	535	0	535	0	535	0	535	0	535	0	530	0	535	0	0	534.167	0.561833
7.1672	0	535	0	535	0	530	0	535	0	535	0	535	0	535	0	535	0	535	0	535	0	530	0	535	0	0	534.167	0.561833
7.1781	0	535	0	535	0	530	0	535	0	535	0	535	0	535	0	535	0	535	0	535	0	530	0	535	0	0	534.167	0.561833
7.189	0	535	0	535	0	530	0	535	0	535	0	535	0	535	0	535	0	535	0	535	0	530	0	535	0	0	534.167	0.561833
7.1999	0	535	0	535	0	530	0	535	0	535	0	535	0	535	0	535	0	535	0	535	0	530	0	535	0	0	534.167	0.561833
7.2108	0	535	0	535	0	530	0	535	0	535	0	535	0	535	0	535	0	535	0	535	0	530	0	535	0	0	534.167	0.561833
7.2217	0	535	0	535	0	530	0	535	0	535	0	535	0	535	0	535	0	535	0	535	0	530	0	535	0	0	534.167	0.561833
7.2326	0	535	0	535	0	530	0	535	0	535	0	535	0	535	0	535	0	535	0	535	0	530	0	535	0	0	534.167	0.561833
7.2435	0	535	0	535	0	530	0	535	0	535	0	535	0	535	0	535	0	535	0	535	0	530	0	535	0	0	534.167	0.561833
7.2544	0	535	0	535	0	530	0	535	0	535	0	535	0	535	0	535	0	535	0	535	0	530	0	535	0	0	534.167	0.561833
7.2653	0	535	0	535	0	530	0	535	0	535	0	535	0	535	0	535	0	535	0	535	0	530	0	535	0	0	534.167	0.561833
7.2762	0	535	0	535	0	530	0	535	0	535	0	535	0	535	0	535	0	535	0	535	0	530	0	535	0	0	534.167	0.561833
7.2871	0	535	0	535	0	530	0	535	0	535	0	535	0	535	0	535	0	535	0	535	0	530	0	535	0	0	534.167	0.561833
7.2979	0	535	0	535	0	530	0	535	0	535	0	535	0	535	0	535	0	535	0	535	0	530	0	535	0	0	534.167	0.561833
7.3088	0	535	0	535	0	530	0	535	0	535	0	535	0	535	0	535	0	535	0	535	0	530	0	535	0	0	534.167	0.561833
7.3197	0	535	0	535	0	530	0	535	0	535	0	535	0	535	0	535	0	535	0	535	0	530	0	535	0	0	534.167	0.561833
7.3306	0	535	0	535	0	530	0	535	0	535	0	535	0	535	0	535	0	535	0	535	0	530	0	535	0	0	534.167	0.561833
7.3415	0	535	0	535	0	530	0	535	0	535	0	535	0	535	0	535	0	535	0	535	0	530	0	535	0	0	534.167	0.561833
7.3524	0	535	0	535	0	530	0	535	0	535	0	535	0	535	0	535	0	535	0	535	0	530	0	535	0	0	534.167	0.561833
7.3633	0	535	0	535	0	530	0	535	0	535	0	535	0	535	0	535	0	535	0	535	0	530	0	535	0	0	534.167	0.561833
7.3742	0	535	0	535	0	530	0	535	0	535	0	535	0	535	0	535	0	535	0	535	0	530	0	535	0	0	534.167	0.561833
7.3851	0	535	0	535	0	530	0	535	0	535	0	535	0	535	0	535	0	535	0	535	0	530	0	535	0	0	534.167	0.561833
7.396	0	535	0	535	0	530	0	535	0	535	0	535	0	535	0	535	0	535	0	535	0	530	0	535	0	0	534.167	0.561833
7.4069	0	535	0	535	0	530	0	535	0	535	0	535	0	535	0	535	0	535	0	535	0	530	0	535	0	0	534.167	0.561833
7.4178	0	535	0	535	0	530	0	535	0	535	0	535	0	535	0	535	0	535	0	535	0	530	0	535	0	0	534.167	0.561833
7.4287	0	535	0	535	0	530	0	535	0	535	0	535	0	535	0	535	0	535	0	535	0	530	0	535	0	0	534.167	0.561833
7.4396	0	535	0	535	0	530	0	535	0	535	0	535	0	535	0	535	0	535	0	535	0	530	0	535	0	0	534.167	0.561833
7.4504	0	535	0	535	0	530	0	535	0	535	0	535	0	535	0	535	0	535	0	535	0	530	0	535	0	0	534.167	0.561833
7.4613	0	535	0	535	0	530	0	535	0	535	0	535	0	535	0	535	0	535	0	535	0	530	0	535	0	0	534.167	0.561833
7.4722	0	535	0	535	0	530	0	535	0	535	0	535	0	535	0	535	0	535	0	535	0	530	0	535	0	0	534.167	0.561833
7.4831	0	535	0	535	0	530	0	535	0	535	0	535	0	535	0	535	0	535	0	535	0	530	0	535	0	0	534.167	0.561833
7.494	0	535	0	535	0	530	0	535	0	535	0	535	0	535	0	535	0	535	0	535	0	530	0	535	0	0	534.167	0.561833
7.5049	0	535	0	535	0	530	0	535	0	535	0	535	0	535	0	535	0	535	0	535	0	530	0	535	0	0	534.167	0.561833
7.5158	0	535	0	535	0	530	0	535	0	535	0	535	0	535	0	535	0	535	0	535	0	530	0	535	0	0	534.167	0.561833
7.5267	0	535	0	535	0	530	0	535	0	535	0	535	0	535	0	535	0	535	0	535	0	530	0	535	0	0	534.167	0.561833
7.5376	0	535	0	535	0	530	0	535	0	535	0	535	0	535	0	535	0	535	0	535	0	530	0	535	0	0	534.167	0.561833
7.5485	0	535	0	535	0	530	0	535	0	535	0	535	0	535	0	535	0	535	0	535	0	530	0	535	0	0	534.167	0.561833
7.5594	0	535	0	535	0	530	0	535	0	535	0	535	0	535	0	535	0	535	0	535	0	530	0	535	0	0	534.167	0.561833
7.5703	0	535	0	535	0	530	0	535	0	535	0	535	0	535	0	535	0	535	0	535	0	530	0	535	0	0	534.167	0.561833
7.5812	0	535	0	535	0	530	0	535	0	535	0	535	0	535	0	535	0	535	0	535	0	530	0	535	0	0	534.167	0.561833
7.592	0	535	0	535	0	530	0	535	0	535	0	535	0	535	0	535	0	535	0	535	0	530	0	535	0	0	534.167	0.561833
7.6029	0	535	0	535	0	530	0	535	0	535	0	535	0	535	0	535	0	535	0	535	0	530	0	535	0	0	534.167	0.561833
7.6138	0	535	0	535	0	530	0	535	0	535	0	535	0	535	0	535	0	535	0	535	0	530	0	535	0	0	534.167	0.561833
7.6247	0	535	0	535	0	530	0	535	0	535	0	535	0	535	0	535	0	535	0	535	0	530	0	535	0	0	534.167	0.561833
7.6356	0	535	0	535	0	530	0	535	0	535	0	535	0	535	0	535	0	535	0	535	0	530	0	535	0	0	534.167	0.561833
7.6465	0	535	0	535	0	530	0	535	0	535	0	535	0	535	0	535	0	535	0	535	0	530	0	535	0	0	534.167	0.561833
7.6574	0	535	0	535	0	530	0	535	0	535	0	535	0	535	0	535	0	535	0	535	0	530	0	535	0	0	534.167	0.561833
7.6683	0	535	0	535	0	530	0	535	0	535	0	535	0	535	0	535	0	535	0	535	0	530	0	535	0	0	534.167	0.561833
7.6792	0	535	0	535	0	530	0	535	0	535	0	535	0	535	0	535	0	535	0	535	0	530	0	535	0	0	534.167	0.561833
7.6901	0	535	0	535	0	530	0	535	0	535	0	535	0	535	0	535	0	535	0	535	0	530	0	535	0	0	534.167	0.561833
7.701	0	535	0	535	0	530	0	535	0	535	0	535	0	535	0	535	0	535	0	535	0	530	0	535	0	0	534.167	0.561833
7.7119	0	535	0	535	0	530	0	535	0	535	0	535	0	535	0	535	0	535	0	535	0	530	0	535	0	0	534.167	0.561833
7.7228	0	535	0	535	0	530	0	535	0	535	0	535	0	535	0	535	0	535	0	535	0	530	0	535	0	0	534.167	0.561833
7.7336	0	535	0	535	0	530	0	535	0	535	0	535	0	535	0	535	0	535	0	535	0	530	0	535	0	0	534.167	0.561833
7.7445	0	535	0	535	0	530	0	535	0	535	0	535	0	535	0	535	0	535	0	535	0	530	0	535	0	0	534.167	0.561833
7.7554	0	535	0	535	0	530	0	535	0	535	0	535	0	535	0	535	0	535	0	535	0	530	0	535	0	0	534.167	0.561833
7.7663	0	535	0	535	0	530	0	535	0	535	0	535	0	535	0	535	0	535	0	535	0	530	0	535	0	0	534.167	0.561833
7.7772	0	535	0	535	0	530	0	535	0	535	0	535	0	535	0	535	0	535	0	535	0	530	0	535	0	0	534.167	0.561833
7.7881	0	535	0	535	0	530	0	535	0	535	0	535	0	535	0	535	0	535	0	535	0	530	0	535	0	0	534.167	0.561833
7.799	0	535	0	535	0	530	0	535	0	535	0	535	0	535	0	535	0	535	0	535	0	530	0	535	0	0	534.167	0.561833
7.8099	0	535	0	535	0	530	0	535	0	535	0	535	0	535	0	535	0	535	0	535	0	530	0	535	0	0	534.167	0.561833
7.8208	0	535	0	535	0	530	0	535	0	535	0	535	0	535	0	535	0	535	0	535	0	530	0	535	0	0	534.167	0.561833
7.8317	0	535	0	535	0	530	0	535	0	535	0	535	0	535	0	535	0	535	0	535	0	530	0	535	0	0	534.167	0.561833
7.8426	0	535	0	535	0	530	0	535	0	535	0	535	0	535	0	535	0	535	0	535	0	530	0	535	0	0	534.167	0.561833
7.8535	0	535	0	535	0	530	0	535	0	535	0	535	0	535	0	535	0	535	0	535	0	530	0	535	0	0	534.167	0.561833
7.8644	0	535	0	535	0	530	0	535	0	535	0	535	0	535	0	535	0	535	0	535	0	530	0	535	0	0	534.167	0.561833
7.8752	0	535	0	535	0	530	0	535	0	535	0	535	0	535	0	535	0	535	0	535	0	530	0	535	0	0	534.167	0.561833
7.8861	0	535	0	535	0	530	0	535	0	535	0	535	0	535	0	535	0	535	0	535	0	530	0	535	0	0	534.167	0.561833
7.897	0	535	0	535	0	530	0	535	0	535	0	535	0	535	0	535	0	535	0	535	0	530	0	535	0	0	534.167	0.561833
7.9079	0	535	0	535	0	530	0	535	0	535	0	535	0	535	0	535	0	535	0	535	0	530	0	535	0	0	534.167	0.561833
7.9188	0	535	0	535	0	530	0	535	0	535	0	535	0	535	0	535	0	535	0	535	0	530	0	535	0	0	534.167	0.561833
7.9297	0	535	0	535	0	530	0	535	0	535	0	535	0	535	0	535	0	535	0	535	0	530	0	535	0	0	534.167	0.561833
7.9406	0	535	0	535	0	530	0	535	0	535	0	535	0	535	0	535	0	535	0	535	0	530	0	535	0	0	534.167	0.561833
7.9515	0	535	0	535	0	530	0	535	0	535	0	535	0	535	0	535	0	535	0	535	0	530	0	535	0	0	534.167	0.561833
7.9624	0	535	0	535	0	530	0	535	0	535	0	535	0	535	0	535	0	535	0	535	0	530	0	535	0	0	534.167	0.561833
7.9733	0	535	0	535	0	530	0	535	0	535	0	535	0	535	0	535	0	535	0	535	0	530	0	535	0	0	534.167	0.561833
7.9842	0	535	0	535	0	530	0	535	0	535	0	535	0	535	0	535	0	535	0	535	0	530	0	535	0	0	534.167	0.561833
7.9951	0	535	0	535	0	530	0	535	0	535	0	535	0	535	0	535	0	535	0	535	0	530	0	535	0	0	534.167	0.561833
8.006	0	535	0	535	0	530	0	535	0	535	0	535	0	535	0	535	0	535	0	535	0	530	0	535	0	0	534.167	0.561833
8.0169	0	535	0	535	0	530	0	535	0	535	0	535	0	535	0	535	0	535	0	535	0	530	0	535	0	0	534.167	0.561833
8.0277	0	535	0	535	0	530	0	535	0	535	0	535	0	535	0	535	0	535	0	535	0	530	0	535	0	0	534.167	0.561833
8.0386	0	535	0	535	0	530	0	535	0	535	0	535	0	535	0	535	0	535	0	535	0	530	0	535	0	0	534.167	0.561833
8.0495	0	535	0	535	0	530	0	535	0	535	0	535	0	535	0	535	0	535	0	535	0	530	0	535	0	0	534.167	0.561833
8.0604	0	535	0	535	0	530	0	535	0	535	0	535	0	535	0	535	0	535	0	535	0	530	0	535	0	0	534.167	0.561833
8.0713	0	535	0	535	0	530	0	535	0	535	0	535	0	535	0	535	0	535	0	535	0	530	0	535	0	0	534.167	0.561833
8.0822	0	535	0	535	0	530	0	535	0	535	0	535	0	535	0	535	0	535	0	535	0	530	0	535	0	0	534.167	0.561833
8.0931	0	535	0	535	0	530	0	535	0	535	0	535	0	535	0	535	0	535	0	535	0	530	0	535	0	0	534.167	0.561833
8.104	0	535	0	535	0	530	0	535	0	535	0	535	0	535	0	535	0	535	0	535	0	530	0	535	0	0	534.167	0.561833
8.1149	0	535	0	535	0	530	0	535	0	535	0	535	0	535	0	535	0	535	0	535	0	530	0	535	0	0	534.167	0.561833
8.1258	0	535	0	535	0	530	0	535	0	535	0	535	0	535	0	535	0	535	0	535	0	530	0	535	0	0	534.167	0.561833
8.1367	0	535	0	535	0	530	0	535	0	535	0	535	0	535	0	535	0	535	0	535	0	530	0	535	0	0	534.167	0.561833
8.1476	0	535	0	535	0	530	0	535	0	535	0	535	0	535	0	535	0	535	0	535	0	530	0	535	0	0	534.167	0.561833
8.1585	0	535	0	535	0	530	0	535	0	535	0	535	0	535	0	535	0	535	0	535	0	530	0	535	0	0	534.167	0.561833
8.1693	0	535	0	535	0	530	0	535	0	535	0	535	0	535	0	535	0	535	0	535	0	530	0	535	0	0	534.167	0.561833
8.1802	0	535	0	535	0	530	0	535	0	535	0	535	0	535	0	535	0	535	0	535	0	530	0	535	0	0	534.167	0.561833
8.1911	0	535	0	535	0	530	0	535	0	535	0	535	0	535	0	535	0	535	0	535	0	530	0	535	0	0	534.167	0.561833
8.202	0	535	0	535	0	530	0	535	0	535	0	535	0	535	0	535	0	535	0	535	0	530	0	535	0	0	534.167	0.561833
8.2129	0	535	0	535	0	530	0	535	0	535	0	535	0	535	0	535	0	535	0	535	0	530	0	535	0	0	534.167	0.561833
8.2238	0	535	0	535	0	530	0	535	0	535	0	535	0	535	0	535	0	535	0	535	0	530	0	535	0	0	534.167	0.561833
8.2347	0	535	0	535	0	530	0	535	0	535	0	535	0	535	0	535	0	535	0	535	0	530	0	535	0	0	534.167	0.561833
8.2456	0	535	0	535	0	530	0	535	0	535	0	535	0	535	0	535	0	535	0	535	0	530	0	535	0	0	534.167	0.561833
8.2565	0	535	0	535	0	530	0	535	0	535	0	535	0	535	0	535	0	535	0	535	0	530	0	535	0	0	534.167	0.561833
8.2674	0	535	0	535	0	530	0	535	0	535	0	535	0	535	0	535	0	535	0	535	0	530	0	535	0	0	534.167	0.561833
8.2783	0	535	0	535	0	530	0	535	0	535	0	535	0	535	0	535	0	535	0	535	0	530	0	535	0	0	534.167	0.561833
8.2892	0	535	0	535	0	530	0	535	0	535	0	535	0	535	0	535	0	535	0	535	0	530	0	535	0	0	534.167	0.561833
8.3001	0	535	0	535	0	530	0	535	0	535	0	535	0	535	0	535	0	535	0	535	0	530	0	535	0	0	534.167	0.561833
8.3109	0	535	0	535	0	530	0	535	0	535	0	535	0	535	0	535	0	535	0	535	0	530	0	535	0	0	534.167	0.561833
8.3218	0	535	0	535	0	530	0	535	0	535	0	535	0	535	0	535	0	535	0	535	0	530	0	535	0	0	534.167	0.561833
8.3327	0	535	0	535	0	530	0	535	0	535	0	535	0	535	0	535	0	535	0	535	0	530	0	535	0	0	534.167	0.561833
8.3436	0	535	0	535	0	530	0	535	0	535	0	535	0	535	0	535	0	535	0	535	0	530	0	535	0	0	534.167	0.561833
8.3545	0	535	0	535	0	530	0	535	0	535	0	535	0	535	0	535	0	535	0	535	0	530	0	535	0	0	534.167	0.561833
8.3654	0	535	0	535	0	530	0	535	0	535	0	535	0	535	0	535	0	535	0	535	0	530	0	535	0	0	534.167	0.561833
8.3763	0	535	0	535	0	530	0	535	0	535	0	535	0	535	0	535	0	535	0	535	0	530	0	535	0	0	534.167	0.561833
8.3872	0	535	0	535	0	530	0	535	0	535	0	535	0	535	0	535	0	535	0	535	0	530	0	535	0	0	534.167	0.561833
8.3981	0	535	0	535	0	530	0	535	0	535	0	535	0	535	0	535	0	535	0	535	0	530	0	535	0	0	534.167	0.561833
8.409	0	535	0	535	0	530	0	535	0	535	0	535	0	535	0	535	0	535	0	535	0	530	0	535	0	0	534.167	0.561833
8.4199	0	535	0	535	0	530	0	535	0	535	0	535	0	535	0	535	0	535	0	535	0	530	0	535	0	0	534.167	0.561833
8.4308	0	535	0	535	0	530	0	535	0	535	0	535	0	535	0	535	0	535	0	535	0	530	0	535	0	0	534.167	0.561833
8.4417	0	535	0	535	0	530	0	535	0	535	0	535	0	535	0	535	0	535	0	535	0	530	0	535	0	0	534.167	0.561833
8.4525	0	535	0	535	0	530	0	535	0	535	0	535	0	535	0	535	0	535	0	535	0	530	0	535	0	0	534.167	0.561833
8.4634	0	535	0	535	0	530	0	535	0	535	0	535	0	535	0	535	0	535	0	535	0	530	0	535	0	0	534.167	0.561833
8.4743	0	535	0	535	0	530	0	535	0	535	0	535	0	535	0	535	0	535	0	535	0	530	0	535	0	0	534.167	0.561833
8.4852	0	535	0	535	0	530	0	535	0	535	0	535	0	535	0	535	0	535	0	535	0	530	0	535	0	0	534.167	0.561833
8.4961	0	535	0	535	0	530	0	535	0	535	0	535	0	535	0	535	0	535	0	535	0	530	0	535	0	0	534.167	0.561833
8.507	0	535	0	535	0	530	0	535	0	535	0	535	0	535	0	535	0	535	0	535	0	530	0	535	0	0	534.167	0.561833
8.5179	0	535	0	535	0	530	0	535	0	535	0	535	0	535	0	535	0	535	0	535	0	530	0	535	0	0	534.167	0.561833
8.5288	0	535	0	535	0	530	0	535	0	535	0	535	0	535	0	535	0	535	0	535	0	530	0	535	0	0	534.167	0.561833
8.5397	0	535	0	535	0	530	0	535	0	535	0	535	0	535	0	535	0	535	0	535	0	530	0	535	0	0	534.167	0.561833
8.5506	0	535	0	535	0	530	0	535	0	535	0	535	0	535	0	535	0	535	0	535	0	530	0	535	0	0	534.167	0.561833
8.5615	0	535	0	535	0	530	0	535	0	535	0	535	0	535	0	535	0	535	0	535	0	530	0	535	0	0	534.167	0.561833
8.5724	0	535	0	535	0	530	0	535	0	535	0	535	0	535	0	535	0	535	0	535	0	530	0	535	0	0	534.167	0.561833
8.5833	0	535	0	535	0	530	0	535	0	535	0	535	0	535	0	535	0	535	0	535	0	530	0	535	0	0	534.167	0.561833
8.5942	0	535	0	535	0	530	0	535	0	535	0	535	0	535	0	535	0	535	0	535	0	530	0	535	0	0	534.167	0.561833
8.605	0	535	0	535	0	530	0	535	0	535	0	535	0	535	0	535	0	535	0	535	0	530	0	535	0	0	534.167	0.561833
8.6159	0	535	0	535	0	530	0	535	0	535	0	535	0	535	0	535	0	535	0	535	0	530	0	535	0	0	534.167	0.561833
8.6268	0	535	0	535	0	530	0	535	0	535	0	535	0	535	0	535	0	535	0	535	0	530	0	535	0	0	534.167	0.561833
8.6377	0	535	0	535	0	530	0	535	0	535	0	535	0	535	0	535	0	535	0	535	0	530	0	535	0	0	534.167	0.561833
8.6486	0	535	0	535	0	530	0	535	0	535	0	535	0	535	0	535	0	535	0	535	0	530	0	535	0	0	534.167	0.561833
8.6595	0	535	0	535	0	530	0	535	0	535	0	535	0	535	0	535	0	535	0	535	0	530	0	535	0	0	534.167	0.561833
8.6704	0	535	0	535	0	530	0	535	0	535	0	535	0	535	0	535	0	535	0	535	0	530	0	535	0	0	534.167	0.561833
8.6813	0	535	0	535	0	530	0	535	0	535	0	535	0	535	0	535	0	535	0	535	0	530	0	535	0	0	534.167	0.561833
8.6922	0	535	0	535	0	530	0	535	0	535	0	535	0	535	0	535	0	535	0	535	0	530	0	535	0	0	534.167	0.561833
8.7031	0	535	0	535	0	530	0	535	0	535	0	535	0	535	0	535	0	535	0	535	0	530	0	535	0	0	534.167	0.561833
8.714	0	535	0	535	0	530	0	535	0	535	0	535	0	535	0	535	0	535	0	535	0	530	0	535	0	0	534.167	0.561833
8.7249	0	535	0	535	0	530	0	535	0	535	0	535	0	535	0	535	0	535	0	535	0	530	0	535	0	0	534.167	0.561833
8.7358	0	535	0	535	0	530	0	535	0	535	0	535	0	535	0	535	0	535	0	535	0	530	0	535	0	0	534.167	0.561833
8.7466	0	535	0	535	0	530	0	535	0	535	0	535	0	535	0	535	0	535	0	535	0	530	0	535	0	0	534.167	0.561833
8.7575	0	535	0	535	0	530	0	535	0	535	0	535	0	535	0	535	0	535	0	535	0	530	0	535	0	0	534.167	0.561833
8.7684	0	535	0	535	0	530	0	535	0	535	0	535	0	535	0	535	0	535	0	535	0	530	0	535	0	0	534.167	0.561833
8.7793	0	535	0	535	0	530	0	535	0	535	0	535	0	535	0	535	0	535	0	535	0	530	0	535	0	0	534.167	0.561833
8.7902	0	535	0	535	0	530	0	535	0	535	0	535	0	535	0	535	0	535	0	535	0	530	0	535	0	0	534.167	0.561833
8.8011	0	535	0	535	0	530	0	535	0	535	0	535	0	535	0	535	0	535	0	535	0	530	0	535	0	0	534.167	0.561833
8.812	0	535	0	535	0	530	0	535	0	535	0	535	0	535	0	535	0	535	0	535	0	530	0	535	0	0	534.167	0.561833
8.8229	0	535	0	535	0	530	0	535	0	535	0	535	0	535	0	535	0	535	0	535	0	530	0	535	0	0	534.167	0.561833
8.8338	0	535	0	535	0	530	0	535	0	535	0	535	0	535	0	535	0	535	0	535	0	530	0	535	0	0	534.167	0.561833
8.8447	0	535	0	535	0	530	0	535	0	535	0	535	0	535	0	535	0	535	0	535	0	530	0	535	0	0	534.167	0.561833
8.8556	0	535	0	535	0	530	0	535	0	535	0	535	0	535	0	535	0	535	0	535	0	530	0	535	0	0	534.167	0.561833
8.8665	0	535	0	535	0	530	0	535	0	535	0	535	0	535	0	535	0	535	0	535	0	530	0	535	0	0	534.167	0.561833
8.8774	0	535	0	535	0	530	0	535	0	535	0	535	0	535	0	535	0	535	0	535	0	530	0	535	0	0	534.167	0.561833
8.8882	0	535	0	535	0	530	0	535	0	535	0	535	0	535	0	535	0	535	0	535	0	530	0	535	0	0	534.167	0.561833
8.8991	0	535	0	535	0	530	0	535	0	535	0	535	0	535	0	535	0	535	0	535	0	530	0	535	0	0	534.167	0.561833
8.91	0	535	0	535	0	530	0	535	0	535	0	535	0	535	0	535	0	535	0	535	0	530	0	535	0	0	534.167	0.561833
8.9209	0	535	0	535	0	530	0	535	0	535	0	535	0	535	0	535	0	535	0	535	0	530	0	535	0	0	534.167	0.561833
8.9318	0	535	0	535	0	530	0	535	0	535	0	535	0	535	0	535	0	535	0	535	0	530	0	535	0	0	534.167	0.561833
8.9427	0	535	0	535	0	530	0	535	0	535	0	535	0	535	0	535	0	535	0	535	0	530	0	535	0	0	534.167	0.561833
8.9536	0	535	0	535	0	530	0	535	0	535	0	535	0	535	0	535	0	535	0	535	0	530	0	535	0	0	534.167	0.561833
8.9645	0	535	0	535	0	530	0	535	0	535	0	535	0	535	0	535	0	535	0	535	0	530	0	535	0	0	534.167	0.561833
8.9754	0	535	0	535	0	530	0	535	0	535	0	535	0	535	0	535	0	535	0	535	0	530	0	535	0	0	534.167	0.561833
8.9863	0	535	0	535	0	530	0	535	0	535	0	535	0	535	0	535	0	535	0	535	0	530	0	535	0	0	534.167	0.561833
8.9972	0	535	0	535	0	530	0	535	0	535	0	535	0	535	0	535	0	535	0	535	0	530	0	535	0	0	534.167	0.561833
9.0081	0	535	0	535	0	530	0	535	0	535	0	535	0	535	0	535	0	535	0	535	0	530	0	535	0	0	534.167	0.561833
9.019	0	535	0	535	0	530	0	535	0	535	0	535	0	535	0	535	0	535	0	535	0	530	0	535	0	0	534.167	0.561833
9.0298	0	535	0	535	0	530	0	535	0	535	0	535	0	535	0	535	0	535	0	535	0	530	0	535	0	0	534.167	0.561833
9.0407	0	535	0	535	0	530	0	535	0	535	0	535	0	535	0	535	0	535	0	535	0	530	0	535	0	0	534.167	0.561833
9.0516	0	535	0	535	0	530	0	535	0	535	0	535	0	535	0	535	0	535	0	535	0	530	0	535	0	0	534.167	0.561833
9.0625	0	535	0	535	0	530	0	535	0	535	0	535	0	535	0	535	0	535	0	535	0	530	0	535	0	0	534.167	0.561833
9.0734	0	535	0	535	0	530	0	535	0	535	0	535	0	535	0	535	0	535	0	535	0	530	0	535	0	0	534.167	0.561833
9.0843	0	535	0	535	0	530	0	535	0	535	0	535	0	535	0	535	0	535	0	535	0	530	0	535	0	0	534.167	0.561833
9.0952	0	535	0	535	0	530	0	535	0	535	0	535	0	535	0	535	0	535	0	535	0	530	0	535	0	0	534.167	0.561833
9.1061	0	535	0	535	0	530	0	535	0	535	0	535	0	535	0	535	0	535	0	535	0	530	0	535	0	0	534.167	0.561833
9.117	0	535	0	535	0	530	0	535	0	535	0	535	0	535	0	535	0	535	0	535	0	530	0	535	0	0	534.167	0.561833
9.1279	0	535	0	535	0	530	0	535	0	535	0	535	0	535	0	535	0	535	0	535	0	530	0	535	0	0	534.167	0.561833
9.1388	0	535	0	535	0	530	0	535	0	535	0	535	0	535	0	535	0	535	0	535	0	530	0	535	0	0	534.167	0.561833
9.1497	0	535	0	535	0	530	0	535	0	535	0	535	0	535	0	535	0	535	0	535	0	530	0	535	0	0	534.167	0.561833
9.1606	0	535	0	535	0	530	0	535	0	535	0	535	0	535	0	535	0	535	0	535	0	530	0	535	0	0	534.167	0.561833
9.1715	0	535	0	535	0	530	0	535	0	535	0	535	0	535	0	535	0	535	0	535	0	530	0	535	0	0	534.167	0.561833
9.1823	0	535	0	535	0	530	0	535	0	535	0	535	0	535	0	535	0	535	0	535	0	530	0	535	0	0	534.167	0.561833
9.1932	0	535	0	535	0	530	0	535	0	535	0	535	0	535	0	535	0	535	0	535	0	530	0	535	0	0	534.167	0.561833
9.2041	0	535	0	535	0	530	0	535	0	535	0	535	0	535	0	535	0	535	0	535	0	530	0	535	0	0	534.167	0.561833
9.215	0	535	0	535	0	530	0	535	0	535	0	535	0	535	0	535	0	535	0	535	0	530	0	535	0	0	534.167	0.561833
9.2259	0	535	0	535	0	530	0	535	0	535	0	535	0	535	0	535	0	535	0	535	0	530	0	535	0	0	534.167	0.561833
9.2368	0	535	0	535	0	530	0	535	0	535	0	535	0	535	0	535	0	535	0	535	0	530	0	535	0	0	534.167	0.561833
9.2477	0	535	0	535	0	530	0	535	0	535	0	535	0	535	0	535	0	535	0	535	0	530	0	535	0	0	534.167	0.561833
9.2586	0	535	0	535	0	530	0	535	0	535	0	535	0	535	0	535	0	535	0	535	0	530	0	535	0	0	534.167	0.561833
9.2695	0	535	0	535	0	530	0	535	0	535	0	535	0	535	0	535	0	535	0	535	0	530	0	535	0	0	534.167	0.561833
9.2804	0	535	0	535	0	530	0	535	0	535	0	535	0	535	0	535	0	535	0	535	0	530	0	535	0	0	534.167	0.561833
9.2913	0	535	0	535	0	530	0	535	0	535	0	535	0	535	0	535	0	535	0	535	0	530	0	535	0	0	534.167	0.561833
9.3022	0	535	0	535	0	530	0	535	0	535	0	535	0	535	0	535	0	535	0	535	0	530	0	535	0	0	534.167	0.561833
9.3131	0	535	0	535	0	530	0	535	0	535	0	535	0	535	0	535	0	535	0	535	0	530	0	535	0	0	534.167	0.561833
9.3239	0	535	0	535	0	530	0	535	0	535	0	535	0	535	0	535	0	535	0	535	0	530	0	535	0	0	534.167	0.561833
9.3348	0	535	0	535	0	530	0	535	0	535	0	535	0	535	0	535	0	535	0	535	0	530	0	535	0	0	534.167	0.561833
9.3457	0	535	0	535	0	530	0	535	0	535	0	535	0	535	0	535	0	535	0	535	0	530	0	535	0	0	534.167	0.561833
9.3566	0	535	0	535	0	530	0	535	0	535	0	535	0	535	0	535	0	535	0	535	0	530	0	535	0	0	534.167	0.561833
9.3675	0	535	0	535	0	530	0	535	0	535	0	535	0	535	0	535	0	535	0	535	0	530	0	535	0	0	534.167	0.561833
9.3784	0	535	0	535	0	530	0	535	0	535	0	535	0	535	0	535	0	535	0	535	0	530	0	535	0	0	534.167	0.561833
9.3893	0	535	0	535	0	530	0	535	0	535	0	535	0	535	0	535	0	535	0	535	0	530	0	535	0	0	534.167	0.561833
9.4002	0	535	0	535	0	530	0	535	0	535	0	535	0	535	0	535	0	535	0	535	0	530	0	535	0	0	534.167	0.561833
9.4111	0	535	0	535	0	530	0	535	0	535	0	535	0	535	0	535	0	535	0	535	0	530	0	535	0	0	534.167	0.561833
9.422	0	535	0	535	0	530	0	535	0	535	0	535	0	535	0	535	0	535	0	535	0	530	0	535	0	0	534.167	0.561833
9.4329	0	535	0	535	0	530	0	535	0	535	0	535	0	535	0	535	0	535	0	535	0	530	0	535	0	0	534.167	0.561833
9.4438	0	535	0	535	0	530	0	535	0	535	0	535	0	535	0	535	0	535	0	535	0	530	0	535	0	0	534.167	0.561833
9.4547	0	535	0	535	0	530	0	535	0	535	0	535	0	535	0	535	0	535	0	535	0	530	0	535	0	0	534.167	0.561833
9.4655	0	535	0	535	0	530	0	535	0	535	0	535	0	535	0	535	0	535	0	535	0	530	0	535	0	0	534.167	0.561833
9.4764	0	535	0	535	0	530	0	535	0	535	0	535	0	535	0	535	0	535	0	535	0	530	0	535	0	0	534.167	0.561833
9.4873	0	535	0	535	0	530	0	535	0	535	0	535	0	535	0	535	0	535	0	535	0	530	0	535	0	0	534.167	0.561833
9.4982	0	535	0	535	0	530	0	535	0	535	0	535	0	535	0	535	0	535	0	535	0	530	0	535	0	0	534.167	0.561833
9.5091	0	535	0	535	0	530	0	535	0	535	0	535	0	535	0	535	0	535	0	535	0	530	0	535	0	0	534.167	0.561833
9.52	0	535	0	535	0	530	0	535	0	535	0	535	0	535	0	535	0	535	0	535	0	530	0	535	0	0	534.167	0.561833
9.5309	0	535	0	535	0	530	0	535	0	535	0	535	0	535	0	535	0	535	0	535	0	530	0	535	0	0	534.167	0.561833
9.5418	0	535	0	535	0	530	0	535	0	535	0	535	0	535	0	535	0	535	0	535	0	530	0	535	0	0	534.167	0.561833
9.5527	0	535	0	535	0	530	0	535	0	535	0	535	0	535	0	535	0	535	0	535	0	530	0	535	0	0	534.167	0.561833
9.5636	0	535	0	535	0	530	0	535	0	535	0	535	0	535	0	535	0	535	0	535	0	530	0	535	0	0	534.167	0.561833
9.5745	0	535	0	535	0	530	0	535	0	535	0	535	0	535	0	535	0	535	0	535	0	530	0	535	0	0	534.167	0.561833
9.5854	0	535	0	535	0	530	0	535	0	535	0	535	0	535	0	535	0	535	0	535	0	530	0	535	0	0	534.167	0.561833
9.5963	0	535	0	535	0	530	0	535	0	535	0	535	0	535	0	535	0	535	0	535	0	530	0	535	0	0	534.167	0.561833
9.6072	0	535	0	535	0	530	0	535	0	535	0	535	0	535	0	535	0	535	0	535	0	530	0	535	0	0	534.167	0.561833
9.618	0	535	0	535	0	530	0	535	0	535	0	535	0	535	0	535	0	535	0	535	0	530	0	535	0	0	534.167	0.561833
9.6289	0	535	0	535	0	530	0	535	0	535	0	535	0	535	0	535	0	535	0	535	0	530	0	535	0	0	534.167	0.561833
9.6398	0	535	0	535	0	530	0	535	0	535	0	535	0	535	0	535	0	535	0	535	0	530	0	535	0	0	534.167	0.561833
9.6507	0	535	0	535	0	530	0	535	0	535	0	535	0	535	0	535	0	535	0	535	0	530	0	535	0	0	534.167	0.561833
9.6616	0	535	0	535	0	530	0	535	0	535	0	535	0	535	0	535	0	535	0	535	0	530	0	535	0	0	534.167	0.561833
9.6725	0	535	0	535	0	530	0	535	0	535	0	535	0	535	0	535	0	535	0	535	0	530	0	535	0	0	534.167	0.561833
9.6834	0	535	0	535	0	530	0	535	0	535	0	535	0	535	0	535	0	535	0	535	0	530	0	535	0	0	534.167	0.561833
9.6943	0	535	0	535	0	530	0	535	0	535	0	535	0	535	0	535	0	535	0	535	0	530	0	535	0	0	534.167	0.561833
9.7052	0	535	0	535	0	530	0	535	0	535	0	535	0	535	0	535	0	535	0	535	0	530	0	535	0	0	534.167	0.561833
9.7161	0	535	0	535	0	530	0	535	0	535	0	535	0	535	0	535	0	535	0	535	0	530	0	535	0	0	534.167	0.561833
9.727	0	535	0	535	0	530	0	535	0	535	0	535	0	535	0	535	0	535	0	535	0	530	0	535	0	0	534.167	0.561833
9.7379	0	535	0	535	0	530	0	535	0	535	0	535	0	535	0	535	0	535	0	535	0	530	0	535	0	0	534.167	0.561833
9.7488	0	535	0	535	0	530	0	535	0	535	0	535	0	535	0	535	0	535	0	535	0	530	0	535	0	0	534.167	0.561833
9.7596	0	535	0	535	0	530	0	535	0	535	0	535	0	535	0	535	0	535	0	535	0	530	0	535	0	0	534.167	0.561833
9.7705	0	535	0	535	0	530	0	535	0	535	0	535	0	535	0	535	0	535	0	535	0	530	0	535	0	0	534.167	0.561833
9.7814	0	535	0	535	0	530	0	535	0	535	0	535	0	535	0	535	0	535	0	535	0	530	0	535	0	0	534.167	0.561833
9.7923	0	535	0	535	0	530	0	535	0	535	0	535	0	535	0	535	0	535	0	535	0	530	0	535	0	0	534.167	0.561833
9.8032	0	535	0	535	0	530	0	535	0	535	0	535	0	535	0	535	0	535	0	535	0	530	0	535	0	0	534.167	0.561833
9.8141	0	535	0	535	0	530	0	535	0	535	0	535	0	535	0	535	0	535	0	535	0	530	0	535	0	0	534.167	0.561833
9.825	0	535	0	535	0	530	0	535	0	535	0	535	0	535	0	535	0	535	0	535	0	530	0	535	0	0	534.167	0.561833
9.8359	0	535	0	535	0	530	0	535	0	535	0	535	0	535	0	535	0	535	0	535	0	530	0	535	0	0	534.167	0.561833
9.8468	0	535	0	535	0	530	0	535	0	535	0	535	0	535	0	535	0	535	0	535	0	530	0	535	0	0	534.167	0.561833
9.8577	0	535	0	535	0	530	0	535	0	535	0	535	0	535	0	535	0	535	0	535	0	530	0	535	0	0	534.167	0.561833
9.8686	0	535	0	535	0	530	0	535	0	535	0	535	0	535	0	535	0	535	0	535	0	530	0	535	0	0	534.167	0.561833
9.8795	0	535	0	535	0	530	0	535	0	535	0	535	0	535	0	535	0	535	0	535	0	530	0	535	0	0	534.167	0.561833
9.8904	0	535	0	535	0	530	0	535	0	535	0	535	0	535	0	535	0	535	0	535	0	530	0	535	0	0	534.167	0.561833
9.9012	0	535	0	535	0	530	0	535	0	535	0	535	0	535	0	535	0	535	0	535	0	530	0	535	0	0	534.167	0.561833
9.9121	0	535	0	535	0	530	0	535	0	535	0	535	0	535	0	535	0	535	0	535	0	530	0	535	0	0	534.167	0.561833
9.923	0	535	0	535	0	530	0	535	0	535	0	535	0	535	0	535	0	535	0	535	0	530	0	535	0	0	534.167	0.561833
9.9339	0	535	0	535	0	530	0	535	0	535	0	535	0	535	0	535	0	535	0	535	0	530	0	535	0	0	534.167	0.561833
9.9448	0	535	0	535	0	530	0	535	0	535	0	535	0	535	0	535	0	535	0	535	0	530	0	535	0	0	534.167	0.561833
9.9557	0	535	0	535	0	530	0	535	0	535	0	535	0	535	0	535	0	535	0	535	0	530	0	535	0	0	534.167	0.561833
9.9666	0	535	0	535	0	530	0	535	0	535	0	535	0	535	0	535	0	535	0	535	0	530	0	535	0	0	534.167	0.561833
9.9775	0	535	0	535	0	530	0	535	0	535	0	535	0	535	0	535	0	535	0	535	0	530	0	535	0	0	534.167	0.561833
9.9884	0	535	0	535	0	530	0	535	0	535	0	535	0	535	0	535	0	535	0	535	0	530	0	535	0	0	534.167	0.561833
9.9993	0	535	0	535	0	530	0	535	0	535	0	535	0	535	0	535	0	535	0	535	0	530	0	535	0	0	534.167	0.561833
10.0102	0	535	0	535	0	530	0	535	0	535	0	535	0	535	0	535	0	535	0	535	0	530	0	535	0	0	534.167	0.561833
10.0211	0	535	0	535	0	530	0	535	0	535	0	535	0	535	0	535	0	535	0	535	0	530	0	535	0	0	534.167	0.561833
10.032	0	535	0	535	0	530	0	535	0	535	0	535	0	535	0	535	0	535	0	535	0	530	0	535	0	0	534.167	0.561833
10.0428	0	535	0	535	0	530	0	535	0	535	0	535	0	535	0	535	0	535	0	535	0	530	0	535	0	0	534.167	0.561833
10.0537	0	535	0	535	0	530	0	535	0	535	0	535	0	535	0	535	0	535	0	535	0	530	0	535	0	0	534.167	0.561833
10.0646	0	535	0	535	0	530	0	535	0	535	0	535	0	535	0	535	0	535	0	535	0	530	0	535	0	0	534.167	0.561833
10.0755	0	535	0	535	0	530	0	535	0	535	0	535	0	535	0	535	0	535	0	535	0	530	0	535	0	0	534.167	0.561833
10.0864	0	535	0	535	0	530	0	535	0	535	0	535	0	535	0	535	0	535	0	535	0	530	0	535	0	0	534.167	0.561833
10.0973	0	535	0	535	0	530	0	535	0	535	0	535	0	535	0	535	0	535	0	535	0	530	0	535	0	0	534.167	0.561833
10.1082	0	535	0	535	0	530	0	535	0	535	0	535	0	535	0	535	0	535	0	535	0	530	0	535	0	0	534.167	0.561833
10.1191	0	535	0	535	0	530	0	535	0	535	0	535	0	535	0	535	0	535	0	535	0	530	0	535	0	0	534.167	0.561833
10.13	0	535	0	535	0	530	0	535	0	535	0	535	0	535	0	535	0	535	0	535	0	530	0	535	0	0	534.167	0.561833
10.1409	0	535	0	535	0	530	0	535	0	535	0	535	0	535	0	535	0	535	0	535	0	530	0	535	0	0	534.167	0.561833
10.1518	0	535	0	535	0	530	0	535	0	535	0	535	0	535	0	535	0	535	0	535	0	530	0	535	0	0	534.167	0.561833
10.1627	0	535	0	535	0	530	0	535	0	535	0	535	0	535	0	535	0	535	0	535	0	530	0	535	0	0	534.167	0.561833
10.1736	0	535	0	535	0	530	0	535	0	535	0	535	0	535	0	535	0	535	0	535	0	530	0	535	0	0	534.167	0.561833
10.1845	0	535	0	535	0	530	0	535	0	535	0	535	0	535	0	535	0	535	0	535	0	530	0	535	0	0	534.167	0.561833
10.1953	0	535	0	535	0	530	0	535	0	535	0	535	0	535	0	535	0	535	0	535	0	530	0	535	0	0	534.167	0.561833
10.2062	0	535	0	535	0	530	0	535	0	535	0	535	0	535	0	535	0	535	0	535	0	530	0	535	0	0	534.167	0.561833
10.2171	0	535	0	535	0	530	0	535	0	535	0	535	0	535	0	535	0	535	0	535	0	530	0	535	0	0	534.167	0.561833
10.228	0	535	0	535	0	530	0	535	0	535	0	535	0	535	0	535	0	535	0	535	0	530	0	535	0	0	534.167	0.561833
10.2389	0	535	0	535	0	530	0	535	0	535	0	535	0	535	0	535	0	535	0	535	0	530	0	535	0	0	534.167	0.561833
10.2498	0	535	0	535	0	530	0	535	0	535	0	535	0	535	0	535	0	535	0	535	0	530	0	535	0	0	534.167	0.561833
10.2607	0	535	0	535	0	530	0	535	0	535	0	535	0	535	0	535	0	535	0	535	0	530	0	535	0	0	534.167	0.561833
10.2716	0	535	0	535	0	530	0	535	0	535	0	535	0	535	0	535	0	535	0	535	0	530	0	535	0	0	534.167	0.561833
10.2825	0	535	0	535	0	530	0	535	0	535	0	535	0	535	0	535	0	535	0	535	0	530	0	535	0	0	534.167	0.561833
10.2934	0	535	0	535	0	530	0	535	0	535	0	535	0	535	0	535	0	535	0	535	0	530	0	535	0	0	534.167	0.561833
10.3043	0	535	0	535	0	530	0	535	0	535	0	535	0	535	0	535	0	535	0	535	0	530	0	535	0	0	534.167	0.561833
10.3152	0	535	0	535	0	530	0	535	0	535	0	535	0	535	0	535	0	535	0	535	0	530	0	535	0	0	534.167	0.561833
10.3261	0	535	0	535	0	530	0	535	0	535	0	535	0	535	0	535	0	535	0	535	0	530	0	535	0	0	534.167	0.561833
10.3369	0	535	0	535	0	530	0	535	0	535	0	535	0	535	0	535	0	535	0	535	0	530	0	535	0	0	534.167	0.561833
10.3478	0	535	0	535	0	530	0	535	0	535	0	535	0	535	0	535	0	535	0	535	0	530	0	535	0	0	534.167	0.561833
10.3587	0	535	0	535	0	530	0	535	0	535	0	535	0	535	0	535	0	535	0	535	0	530	0	535	0	0	534.167	0.561833
10.3696	0	535	0	535	0	530	0	535	0	535	0	535	0	535	0	535	0	535	0	535	0	530	0	535	0	0	534.167	0.561833
10.3805	0	535	0	535	0	530	0	535	0	535	0	535	0	535	0	535	0	535	0	535	0	530	0	535	0	0	534.167	0.561833
10.3914	0	535	0	535	0	530	0	535	0	535	0	535	0	535	0	535	0	535	0	535	0	530	0	535	0	0	534.167	0.561833
10.4023	0	535	0	535	0	530	0	535	0	535	0	535	0	535	0	535	0	535	0	535	0	530	0	535	0	0	534.167	0.561833
10.4132	0	535	0	535	0	530	0	535	0	535	0	535	0	535	0	535	0	535	0	535	0	530	0	535	0	0	534.167	0.561833
10.4241	0	535	0	535	0	530	0	535	0	535	0	535	0	535	0	535	0	535	0	535	0	530	0	535	0	0	534.167	0.561833
10.435	0	535	0	535	0	530	0	535	0	535	0	535	0	535	0	535	0	535	0	535	0	530	0	535	0	0	534.167	0.561833
10.4459	0	535	0	535	0	530	0	535	0	535	0	535	0	535	0	535	0	535	0	535	0	530	0	535	0	0	534.167	0.561833
10.4568	0	535	0	535	0	530	0	535	0	535	0	535	0	535	0	535	0	535	0	535	0	530	0	535	0	0	534.167	0.561833
10.4677	0	535	0	535	0	530	0	535	0	535	0	535	0	535	0	535	0	535	0	535	0	530	0	535	0	0	534.167	0.561833
10.4785	0	535	0	535	0	530	0	535	0	535	0	535	0	535	0	535	0	535	0	535	0	530	0	535	0	0	534.167	0.561833
10.4894	0	535	0	535	0	530	0	535	0	535	0	535	0	535	0	535	0	535	0	535	0	530	0	535	0	0	534.167	0.561833
10.5003	0	535	0	535	0	530	0	535	0	535	0	535	0	535	0	535	0	535	0	535	0	530	0	535	0	0	534.167	0.561833
10.5112	0	535	0	535	0	530	0	535	0	535	0	535	0	535	0	535	0	535	0	535	0	530	0	535	0	0	534.167	0.561833
10.5221	0	535	0	535	0	530	0	535	0	535	0	535	0	535	0	535	0	535	0	535	0	530	0	535	0	0	534.167	0.561833
10.533	0	535	0	535	0	530	0	535	0	535	0	535	0	535	0	535	0	535	0	535	0	530	0	535	0	0	534.167	0.561833
10.5439	0	535	0	535	0	530	0	535	0	535	0	535	0	535	0	535	0	535	0	535	0	530	0	535	0	0	534.167	0.561833
10.5548	0	535	0	535	0	530	0	535	0	535	0	535	0	535	0	535	0	535	0	535	0	530	0	535	0	0	534.167	0.561833
10.5657	0	535	0	535	0	530	0	535	0	535	0	535	0	535	0	535	0	535	0	535	0	530	0	535	0	0	534.167	0.561833
10.5766	0	535	0	535	0	530	0	535	0	535	0	535	0	535	0	535	0	535	0	535	0	530	0	535	0	0	534.167	0.561833
10.5875	0	535	0	535	0	530	0	535	0	535	0	535	0	535	0	535	0	535	0	535	0	530	0	535	0	0	534.167	0.561833
10.5984	0	535	0	535	0	530	0	535	0	535	0	535	0	535	0	535	0	535	0	535	0	530	0	535	0	0	534.167	0.561833
10.6093	0	535	0	535	0	530	0	535	0	535	0	535	0	535	0	535	0	535	0	535	0	530	0	535	0	0	534.167	0.561833
10.6201	0	535	0	535	0	530	0	535	0	535	0	535	0	535	0	535	0	535	0	535	0	530	0	535	0	0	534.167	0.561833
10.631	0	535	0	535	0	530	0	535	0	535	0	535	0	535	0	535	0	535	0	535	0	530	0	535	0	0	534.167	0.561833
10.6419	0	535	0	535	0	530	0	535	0	535	0	535	0	535	0	535	0	535	0	535	0	530	0	535	0	0	534.167	0.561833
10.6528	0	535	0	535	0	530	0	535	0	535	0	535	0	535	0	535	0	535	0	535	0	530	0	535	0	0	534.167	0.561833
10.6637	0	535	0	535	0	530	0	535	0	535	0	535	0	535	0	535	0	535	0	535	0	530	0	535	0	0	534.167	0.561833
10.6746	0	535	0	535	0	530	0	535	0	535	0	535	0	535	0	535	0	535	0	535	0	530	0	535	0	0	534.167	0.561833
10.6855	0	535	0	535	0	530	0	535	0	535	0	535	0	535	0	535	0	535	0	535	0	530	0	535	0	0	534.167	0.561833
10.6964	0	535	0	535	0	530	0	535	0	535	0	535	0	535	0	535	0	535	0	535	0	530	0	535	0	0	534.167	0.561833
10.7073	0	535	0	535	0	530	0	535	0	535	0	535	0	535	0	535	0	535	0	535	0	530	0	535	0	0	534.167	0.561833
10.7182	0	535	0	535	0	530	0	535	0	535	0	535	0	535	0	535	0	535	0	535	0	530	0	535	0	0	534.167	0.561833
10.7291	0	535	0	535	0	530	0	535	0	535	0	535	0	535	0	535	0	535	0	535	0	530	0	535	0	0	534.167	0.561833
10.74	0	535	0	535	0	530	0	535	0	535	0	535	0	535	0	535	0	535	0	535	0	530	0	535	0	0	534.167	0.561833
10.7509	0	535	0	535	0	530	0	535	0	535	0	535	0	535	0	535	0	535	0	535	0	530	0	535	0	0	534.167	0.561833
10.7618	0	535	0	535	0	530	0	535	0	535	0	535	0	535	0	535	0	535	0	535	0	530	0	535	0	0	534.167	0.561833
10.7726	0	535	0	535	0	530	0	535	0	535	0	535	0	535	0	535	0	535	0	535	0	530	0	535	0	0	534.167	0.561833
10.7835	0	535	0	535	0	530	0	535	0	535	0	535	0	535	0	535	0	535	0	535	0	530	0	535	0	0	534.167	0.561833
10.7944	0	535	0	535	0	530	0	535	0	535	0	535	0	535	0	535	0	535	0	535	0	530	0	535	0	0	534.167	0.561833
10.8053	0	535	0	535	0	530	0	535	0	535	0	535	0	535	0	535	0	535	0	535	0	530	0	535	0	0	534.167	0.561833
10.8162	0	535	0	535	0	530	0	535	0	535	0	535	0	535	0	535	0	535	0	535	0	530	0	535	0	0	534.167	0.561833
10.8271	0	535	0	535	0	530	0	535	0	535	0	535	0	535	0	535	0	535	0	535	0	530	0	535	0	0	534.167	0.561833
10.838	0	535	0	535	0	530	0	535	0	535	0	535	0	535	0	535	0	535	0	535	0	530	0	535	0	0	534.167	0.561833
10.8489	0	535	0	535	0	530	0	535	0	535	0	535	0	535	0	535	0	535	0	535	0	530	0	535	0	0	534.167	0.561833
10.8598	0	535	0	535	0	530	0	535	0	535	0	535	0	535	0	535	0	535	0	535	0	530	0	535	0	0	534.167	0.561833
10.8707	0	535	0	535	0	530	0	535	0	535	0	535	0	535	0	535	0	535	0	535	0	530	0	535	0	0	534.167	0.561833
10.8816	0	535	0	535	0	530	0	535	0	535	0	535	0	535	0	535	0	535	0	535	0	530	0	535	0	0	534.167	0.561833
10.8925	0	535	0	535	0	530	0	535	0	535	0	535	0	535	0	535	0	535	0	535	0	530	0	535	0	0	534.167	0.561833
10.9034	0	535	0	535	0	530	0	535	0	535	0	535	0	535	0	535	0	535	0	535	0	530	0	535	0	0	534.167	0.561833
10.9142	0	535	0	535	0	530	0	535	0	535	0	535	0	535	0	535	0	535	0	535	0	530	0	535	0	0	534.167	0.561833
10.9251	0	535	0	535	0	530	0	535	0	535	0	535	0	535	0	535	0	535	0	535	0	530	0	535	0	0	534.167	0.561833
10.936	0	535	0	535	0	530	0	535	0	535	0	535	0	535	0	535	0	535	0	535	0	530	0	535	0	0	534.167	0.561833
10.9469	0	535	0	535	0	530	0	535	0	535	0	535	0	535	0	535	0	535	0	535	0	530	0	535	0	0	534.167	0.561833
10.9578	0	535	0	535	0	530	0	535	0	535	0	535	0	535	0	535	0	535	0	535	0	530	0	535	0	0	534.167	0.561833
10.9687	0	535	0	535	0	530	0	535	0	535	0	535	0	535	0	535	0	535	0	535	0	530	0	535	0	0	534.167	0.561833
10.9796	0	535	0	535	0	530	0	535	0	535	0	535	0	535	0	535	0	535	0	535	0	530	0	535	0	0	534.167	0.561833
10.9905	0	535	0	535	0	530	0	535	0	535	0	535	0	535	0	535	0	535	0	535	0	530	0	535	0	0	534.167	0.561833
11.0014	0	535	0	535	0	530	0	535	0	535	0	535	0	535	0	535	0	535	0	535	0	530	0	535	0	0	534.167	0.561833
11.0123	0	535	0	535	0	530	0	535	0	535	0	535	0	535	0	535	0	535	0	535	0	530	0	535	0	0	534.167	0.561833
11.0232	0	535	0	535	0	530	0	535	0	535	0	535	0	535	0	535	0	535	0	535	0	530	0	535	0	0	534.167	0.561833
11.0341	0	535	0	535	0	530	0	535	0	535	0	535	0	535	0	535	0	535	0	535	0	530	0	535	0	0	534.167	0.561833
11.045	0	535	0	535	0	530	0	535	0	535	0	535	0	535	0	535	0	535	0	535	0	530	0	535	0	0	534.167	0.561833
11.0558	0	535	0	535	0	530	0	535	0	535	0	535	0	535	0	535	0	535	0	535	0	530	0	535	0	0	534.167	0.561833
11.0667	0	535	0	535	0	530	0	535	0	535	0	535	0	535	0	535	0	535	0	535	0	530	0	535	0	0	534.167	0.561833
11.0776	0	535	0	535	0	530	0	535	0	535	0	535	0	535	0	535	0	535	0	535	0	530	0	535	0	0	534.167	0.561833
11.0885	0	535	0	535	0	530	0	535	0	535	0	535	0	535	0	535	0	535	0	535	0	530	0	535	0	0	534.167	0.561833
11.0994	0	535	0	535	0	530	0	535	0	535	0	535	0	535	0	535	0	535	0	535	0	530	0	535	0	0	534.167	0.561833
11.1103	0	535	0	535	0	530	0	535	0	535	0	535	0	535	0	535	0	535	0	535	0	530	0	535	0	0	534.167	0.561833
11.1212	0	535	0	535	0	530	0	535	0	535	0	535	0	535	0	535	0	535	0	535	0	530	0	535	0	0	534.167	0.561833
11.1321	0	535	0	535	0	530	0	535	0	535	0	535	0	535	0	535	0	535	0	535	0	530	0	535	0	0	534.167	0.561833
11.143	0	535	0	535	0	530	0	535	0	535	0	535	0	535	0	535	0	535	0	535	0	530	0	535	0	0	534.167	0.561833
11.1539	0	535	0	535	0	530	0	535	0	535	0	535	0	535	0	535	0	535	0	535	0	530	0	535	0	0	534.167	0.561833
11.1648	0	535	0	535	0	530	0	535	0	535	0	535	0	535	0	535	0	535	0	535	0	530	0	535	0	0	534.167	0.561833
11.1757	0	535	0	535	0	530	0	535	0	535	0	535	0	535	0	535	0	535	0	535	0	530	0	535	0	0	534.167	0.561833
11.1866	0	535	0	535	0	530	0	535	0	535	0	535	0	535	0	535	0	535	0	535	0	530	0	535	0	0	534.167	0.561833
11.1974	0	535	0	535	0	530	0	535	0	535	0	535	0	535	0	535	0	535	0	535	0	530	0	535	0	0	534.167	0.561833
11.2083	0	535	0	535	0	530	0	535	0	535	0	535	0	535	0	535	0	535	0	535	0	530	0	535	0	0	534.167	0.561833
11.2192	0	535	0	535	0	530	0	535	0	535	0	535	0	535	0	535	0	535	0	535	0	530	0	535	0	0	534.167	0.561833
11.2301	0	535	0	535	0	530	0	535	0	535	0	535	0	535	0	535	0	535	0	535	0	530	0	535	0	0	534.167	0.561833
11.241	0	535	0	535	0	530	0	535	0	535	0	535	0	535	0	535	0	535	0	535	0	530	0	535	0	0	534.167	0.561833
11.2519	0	535	0	535	0	530	0	535	0	535	0	535	0	535	0	535	0	535	0	535	0	530	0	535	0	0	534.167	0.561833
11.2628	0	535	0	535	0	530	0	535	0	535	0	535	0	535	0	535	0	535	0	535	0	530	0	535	0	0	534.167	0.561833
11.2737	0	535	0	535	0	530	0	535	0	535	0	535	0	535	0	535	0	535	0	535	0	530	0	535	0	0	534.167	0.561833
11.2846	0	535	0	535	0	530	0	535	0	535	0	535	0	535	0	535	0	535	0	535	0	530	0	535	0	0	534.167	0.561833
11.2955	0	535	0	535	0	530	0	535	0	535	0	535	0	535	0	535	0	535	0	535	0	530	0	535	0	0	534.167	0.561833
11.3064	0	535	0	535	0	530	0	535	0	535	0	535	0	535	0	535	0	535	0	535	0	530	0	535	0	0	534.167	0.561833
11.3173	0	535	0	535	0	530	0	535	0	535	0	535	0	535	0	535	0	535	0	535	0	530	0	535	0	0	534.167	0.561833
11.3282	0	535	0	535	0	530	0	535	0	535	0	535	0	535	0	535	0	535	0	535	0	530	0	535	0	0	534.167	0.561833
11.3391	0	535	0	535	0	530	0	535	0	535	0	535	0	535	0	535	0	535	0	535	0	530	0	535	0	0	534.167	0.561833
11.3499	0	535	0	535	0	530	0	535	0	535	0	535	0	535	0	535	0	535	0	535	0	530	0	535	0	0	534.167	0.561833
11.3608	0	535	0	535	0	530	0	535	0	535	0	535	0	535	0	535	0	535	0	535	0	530	0	535	0	0	534.167	0.561833
11.3717	0	535	0	535	0	530	0	535	0	535	0	535	0	535	0	535	0	535	0	535	0	530	0	535	0	0	534.167	0.561833
11.3826	0	535	0	535	0	530	0	535	0	535	0	535	0	535	0	535	0	535	0	535	0	530	0	535	0	0	534.167	0.561833
11.3935	0	535	0	535	0	530	0	535	0	535	0	535	0	535	0	535	0	535	0	535	0	530	0	535	0	0	534.167	0.561833
11.4044	0	535	0	535	0	530	0	535	0	535	0	535	0	535	0	535	0	535	0	535	0	530	0	535	0	0	534.167	0.561833
11.4153	0	535	0	535	0	530	0	535	0	535	0	535	0	535	0	535	0	535	0	535	0	530	0	535	0	0	534.167	0.561833
11.4262	0	535	0	535	0	530	0	535	0	535	0	535	0	535	0	535	0	535	0	535	0	530	0	535	0	0	534.167	0.561833
11.4371	0	535	0	535	0	530	0	535	0	535	0	535	0	535	0	535	0	535	0	535	0	530	0	535	0	0	534.167	0.561833
11.448	0	535	0	535	0	530	0	535	0	535	0	535	0	535	0	535	0	535	0	535	0	530	0	535	0	0	534.167	0.561833
11.4589	0	535	0	535	0	530	0	535	0	535	0	535	0	535	0	535	0	535	0	535	0	530	0	535	0	0	534.167	0.561833
11.4698	0	535	0	535	0	530	0	535	0	535	0	535	0	535	0	535	0	535	0	535	0	530	0	535	0	0	534.167	0.561833
11.4807	0	535	0	535	0	530	0	535	0	535	0	535	0	535	0	535	0	535	0	535	0	530	0	535	0	0	534.167	0.561833
11.4915	0	535	0	535	0	530	0	535	0	535	0	535	0	535	0	535	0	535	0	535	0	530	0	535	0	0	534.167	0.561833
11.5024	0	535	0	535	0	530	0	535	0	535	0	535	0	535	0	535	0	535	0	535	0	530	0	535	0	0	534.167	0.561833
11.5133	0	535	0	535	0	530	0	535	0	535	0	535	0	535	0	535	0	535	0	535	0	530	0	535	0	0	534.167	0.561833
11.5242	0	535	0	535	0	530	0	535	0	535	0	535	0	535	0	535	0	535	0	535	0	530	0	535	0	0	534.167	0.561833
11.5351	0	535	0	535	0	530	0	535	0	535	0	535	0	535	0	535	0	535	0	535	0	530	0	535	0	0	534.167	0.561833
11.546	0	535	0	535	0	530	0	535	0	535	0	535	0	535	0	535	0	535	0	535	0	530	0	535	0	0	534.167	0.561833
11.5569	0	535	0	535	0	530	0	535	0	535	0	535	0	535	0	535	0	535	0	535	0	530	0	535	0	0	534.167	0.561833
11.5678	0	535	0	535	0	530	0	535	0	535	0	535	0	535	0	535	0	535	0	535	0	530	0	535	0	0	534.167	0.561833
11.5787	0	535	0	535	0	530	0	535	0	535	0	535	0	535	0	535	0	535	0	535	0	530	0	535	0	0	534.167	0.561833
11.5896	0	535	0	535	0	530	0	535	0	535	0	535	0	535	0	535	0	535	0	535	0	530	0	535	0	0	534.167	0.561833
11.6005	0	535	0	535	0	530	0	535	0	535	0	535	0	535	0	535	0	535	0	535	0	530	0	535	0	0	534.167	0.561833
11.6114	0	535	0	535	0	530	0	535	0	535	0	535	0	535	0	535	0	535	0	535	0	530	0	535	0	0	534.167	0.561833
11.6223	0	535	0	535	0	530	0	535	0	535	0	535	0	535	0	535	0	535	0	535	0	530	0	535	0	0	534.167	0.561833
11.6331	0	535	0	535	0	530	0	535	0	535	0	535	0	535	0	535	0	535	0	535	0	530	0	535	0	0	534.167	0.561833
11.644	0	535	0	535	0	530	0	535	0	535	0	535	0	535	0	535	0	535	0	535	0	530	0	535	0	0	534.167	0.561833
11.6549	0	535	0	535	0	530	0	535	0	535	0	535	0	535	0	535	0	535	0	535	0	530	0	535	0	0	534.167	0.561833
11.6658	0	535	0	535	0	530	0	535	0	535	0	535	0	535	0	535	0	535	0	535	0	530	0	535	0	0	534.167	0.561833
11.6767	0	535	0	535	0	530	0	535	0	535	0	535	0	535	0	535	0	535	0	535	0	530	0	535	0	0	534.167	0.561833
11.6876	0	535	0	535	0	530	0	535	0	535	0	535	0	535	0	535	0	535	0	535	0	530	0	535	0	0	534.167	0.561833
11.6985	0	535	0	535	0	530	0	535	0	535	0	535	0	535	0	535	0	535	0	535	0	530	0	535	0	0	534.167	0.561833
11.7094	0	535	0	535	0	530	0	535	0	535	0	535	0	535	0	535	0	535	0	535	0	530	0	535	0	0	534.167	0.561833
11.7203	0	535	0	535	0	530	0	535	0	535	0	535	0	535	0	535	0	535	0	535	0	530	0	535	0	0	534.167	0.561833
11.7312	0	535	0	535	0	530	0	535	0	535	0	535	0	535	0	535	0	535	0	535	0	530	0	535	0	0	534.167	0.561833
11.7421	0	535	0	535	0	530	0	535	0	535	0	535	0	535	0	535	0	535	0	535	0	530	0	535	0	0	534.167	0.561833
11.753	0	535	0	535	0	530	0	535	0	535	0	535	0	535	0	535	0	535	0	535	0	530	0	535	0	0	534.167	0.561833
11.7639	0	535	0	535	0	530	0	535	0	535	0	535	0	535	0	535	0	535	0	535	0	530	0	535	0	0	534.167	0.561833
11.7747	0	535	0	535	0	530	0	535	0	535	0	535	0	535	0	535	0	535	0	535	0	530	0	535	0	0	534.167	0.561833
11.7856	0	535	0	535	0	530	0	535	0	535	0	535	0	535	0	535	0	535	0	535	0	530	0	535	0	0	534.167	0.561833
11.7965	0	535	0	535	0	530	0	535	0	535	0	535	0	535	0	535	0	535	0	535	0	530	0	535	0	0	534.167	0.561833
11.8074	0	535	0	535	0	530	0	535	0	535	0	535	0	535	0	535	0	535	0	535	0	530	0	535	0	0	534.167	0.561833
11.8183	0	535	0	535	0	530	0	535	0	535	0	535	0	535	0	535	0	535	0	535	0	530	0	535	0	0	534.167	0.561833
11.8292	0	535	0	535	0	530	0	535	0	535	0	535	0	535	0	535	0	535	0	535	0	530	0	535	0	0	534.167	0.561833
11.8401	0	535	0	535	0	530	0	535	0	535	0	535	0	535	0	535	0	535	0	535	0	530	0	535	0	0	534.167	0.561833
11.851	0	535	0	535	0	530	0	535	0	535	0	535	0	535	0	535	0	535	0	535	0	530	0	535	0	0	534.167	0.561833
11.8619	0	535	0	535	0	530	0	535	0	535	0	535	0	535	0	535	0	535	0	535	0	530	0	535	0	0	534.167	0.561833
11.8728	0	535	0	535	0	530	0	535	0	535	0	535	0	535	0	535	0	535	0	535	0	530	0	535	0	0	534.167	0.561833
11.8837	0	535	0	535	0	530	0	535	0	535	0	535	0	535	0	535	0	535	0	535	0	530	0	535	0	0	534.167	0.561833
11.8946	0	535	0	535	0	530	0	535	0	535	0	535	0	535	0	535	0	535	0	535	0	530	0	535	0	0	534.167	0.561833
11.9055	0	535	0	535	0	530	0	535	0	535	0	535	0	535	0	535	0	535	0	535	0	530	0	535	0	0	534.167	0.561833
11.9164	0	535	0	535	0	530	0	535	0	535	0	535	0	535	0	535	0	535	0	535	0	530	0	535	0	0	534.167	0.561833
11.9272	0	535	0	535	0	530	0	535	0	535	0	535	0	535	0	535	0	535	0	535	0	530	0	535	0	0	534.167	0.561833
11.9381	0	535	0	535	0	530	0	535	0	535	0	535	0	535	0	535	0	535	0	535	0	530	0	535	0	0	534.167	0.561833
11.949	0	535	0	535	0	530	0	535	0	535	0	535	0	535	0	535	0	535	0	535	0	530	0	535	0	0	534.167	0.561833
11.9599	0	535	0	535	0	530	0	535	0	535	0	535	0	535	0	535	0	535	0	535	0	530	0	535	0	0	534.167	0.561833
11.9708	0	535	0	535	0	530	0	535	0	535	0	535	0	535	0	535	0	535	0	535	0	530	0	535	0	0	534.167	0.561833
11.9817	0	535	0	535	0	530	0	535	0	535	0	535	0	535	0	535	0	535	0	535	0	530	0	535	0	0	534.167	0.561833
11.9926	0	535	0	535	0	530	0	535	0	535	0	535	0	535	0	535	0	535	0	535	0	530	0	535	0	0	534.167	0.561833
12.0035	0	535	0	535	0	530	0	535	0	535	0	535	0	535	0	535	0	535	0	535	0	530	0	535	0	0	534.167	0.561833
12.0144	0	535	0	535	0	530	0	535	0	535	0	535	0	535	0	535	0	535	0	535	0	530	0	535	0	0	534.167	0.561833
12.0253	0	535	0	535	0	530	0	535	0	535	0	535	0	535	0	535	0	535	0	535	0	530	0	535	0	0	534.167	0.561833
12.0362	0	535	0	535	0	530	0	535	0	535	0	535	0	535	0	535	0	535	0	535	0	530	0	535	0	0	534.167	0.561833
12.0471	0	535	0	535	0	530	0	535	0	535	0	535	0	535	0	535	0	535	0	535	0	530	0	535	0	0	534.167	0.561833
12.058	0	535	0	535	0	530	0	535	0	535	0	535	0	535	0	535	0	535	0	535	0	530	0	535	0	0	534.167	0.561833
12.0688	0	535	0	535	0	530	0	535	0	535	0	535	0	535	0	535	0	535	0	535	0	530	0	535	0	0	534.167	0.561833
12.0797	0	535	0	535	0	530	0	535	0	535	0	535	0	535	0	535	0	535	0	535	0	530	0	535	0	0	534.167	0.561833
12.0906	0	535	0	535	0	530	0	535	0	535	0	535	0	535	0	535	0	535	0	535	0	530	0	535	0	0	534.167	0.561833
12.1015	0	535	0	535	0	530	0	535	0	535	0	535	0	535	0	535	0	535	0	535	0	530	0	535	0	0	534.167	0.561833
12.1124	0	535	0	535	0	530	0	535	0	535	0	535	0	535	0	535	0	535	0	535	0	530	0	535	0	0	534.167	0.561833
12.1233	0	535	0	535	0	530	0	535	0	535	0	535	0	535	0	535	0	535	0	535	0	530	0	535	0	0	534.167	0.561833
12.1342	0	535	0	535	0	530	0	535	0	535	0	535	0	535	0	535	0	535	0	535	0	530	0	535	0	0	534.167	0.561833
12.1451	0	535	0	535	0	530	0	535	0	535	0	535	0	535	0	535	0	535	0	535	0	530	0	535	0	0	534.167	0.561833
12.156	0	535	0	535	0	530	0	535	0	535	0	535	0	535	0	535	0	535	0	535	0	530	0	535	0	0	534.167	0.561833
12.1669	0	535	0	535	0	530	0	535	0	535	0	535	0	535	0	535	0	535	0	535	0	530	0	535	0	0	534.167	0.561833
12.1778	0	535	0	535	0	530	0	535	0	535	0	535	0	535	0	535	0	535	0	535	0	530	0	535	0	0	534.167	0.561833
12.1887	0	535	0	535	0	530	0	535	0	535	0	535	0	535	0	535	0	535	0	535	0	530	0	535	0	0	534.167	0.561833
12.1996	0	535	0	535	0	530	0	535	0	535	0	535	0	535	0	535	0	535	0	535	0	530	0	535	0	0	534.167	0.561833
12.2104	0	535	0	535	0	530	0	535	0	535	0	535	0	535	0	535	0	535	0	535	0	530	0	535	0	0	534.167	0.561833
12.2213	0	535	0	535	0	530	0	535	0	535	0	535	0	535	0	535	0	535	0	535	0	530	0	535	0	0	534.167	0.561833
12.2322	0	535	0	535	0	530	0	535	0	535	0	535	0	535	0	535	0	535	0	535	0	530	0	535	0	0	534.167	0.561833
12.2431	0	535	0	535	0	530	0	535	0	535	0	535	0	535	0	535	0	535	0	535	0	530	0	535	0	0	534.167	0.561833
12.254	0	535	0	535	0	530	0	535	0	535	0	535	0	535	0	535	0	535	0	535	0	530	0	535	0	0	534.167	0.561833
12.2649	0	535	0	535	0	530	0	535	0	535	0	535	0	535	0	535	0	535	0	535	0	530	0	535	0	0	534.167	0.561833
12.2758	0	535	0	535	0	530	0	535	0	535	0	535	0	535	0	535	0	535	0	535	0	530	0	535	0	0	534.167	0.561833
12.2867	0	535	0	535	0	530	0	535	0	535	0	535	0	535	0	535	0	535	0	535	0	530	0	535	0	0	534.167	0.561833
12.2976	0	535	0	535	0	530	0	535	0	535	0	535	0	535	0	535	0	535	0	535	0	530	0	535	0	0	534.167	0.561833
12.3085	0	535	0	535	0	530	0	535	0	535	0	535	0	535	0	535	0	535	0	535	0	530	0	535	0	0	534.167	0.561833
12.3194	0	535	0	535	0	530	0	535	0	535	0	535	0	535	0	535	0	535	0	535	0	530	0	535	0	0	534.167	0.561833
12.3303	0	535	0	535	0	530	0	535	0	535	0	535	0	535	0	535	0	535	0	535	0	530	0	535	0	0	534.167	0.561833
12.3412	0	535	0	535	0	530	0	535	0	535	0	535	0	535	0	535	0	535	0	535	0	530	0	535	0	0	534.167	0.561833
12.3521	0	535	0	535	0	530	0	535	0	535	0	535	0	535	0	535	0	535	0	535	0	530	0	535	0	0	534.167	0.561833
12.3629	0	535	0	535	0	530	0	535	0	535	0	535	0	535	0	535	0	535	0	535	0	530	0	535	0	0	534.167	0.561833
12.3738	0	535	0	535	0	530	0	535	0	535	0	535	0	535	0	535	0	535	0	535	0	530	0	535	0	0	534.167	0.561833
12.3847	0	535	0	535	0	530	0	535	0	535	0	535	0	535	0	535	0	535	0	535	0	530	0	535	0	0	534.167	0.561833
12.3956	0	535	0	535	0	530	0	535	0	535	0	535	0	535	0	535	0	535	0	535	0	530	0	535	0	0	534.167	0.561833
12.4065	0	535	0	535	0	530	0	535	0	535	0	535	0	535	0	535	0	535	0	535	0	530	0	535	0	0	534.167	0.561833
12.4174	0	535	0	535	0	530	0	535	0	535	0	535	0	535	0	535	0	535	0	535	0	530	0	535	0	0	534.167	0.561833
12.4283	0	535	0	535	0	530	0	535	0	535	0	535	0	535	0	535	0	535	0	535	0	530	0	535	0	0	534.167	0.561833
12.4392	0	535	0	535	0	530	0	535	0	535	0	535	0	535	0	535	0	535	0	535	0	530	0	535	0	0	534.167	0.561833
12.4501	0	535	0	535	0	530	0	535	0	535	0	535	0	535	0	535	0	535	0	535	0	530	0	535	0	0	534.167	0.561833
12.461	0	535	0	535	0	530	0	535	0	535	0	535	0	535	0	535	0	535	0	535	0	530	0	535	0	0	534.167	0.561833
12.4719	0	535	0	535	0	530	0	535	0	535	0	535	0	535	0	535	0	535	0	535	0	530	0	535	0	0	534.167	0.561833
12.4828	0	535	0	535	0	530	0	535	0	535	0	535	0	535	0	535	0	535	0	535	0	530	0	535	0	0	534.167	0.561833
12.4937	0	535	0	535	0	530	0	535	0	535	0	535	0	535	0	535	0	535	0	535	0	530	0	535	0	0	534.167	0.561833
12.5045	0	535	0	535	0	530	0	535	0	535	0	535	0	535	0	535	0	535	0	535	0	530	0	535	0	0	534.167	0.561833
12.5154	0	535	0	535	0	530	0	535	0	535	0	535	0	535	0	535	0	535	0	535	0	530	0	535	0	0	534.167	0.561833
12.5263	0	535	0	535	0	530	0	535	0	535	0	535	0	535	0	535	0	535	0	535	0	530	0	535	0	0	534.167	0.561833
12.5372	0	535	0	535	0	530	0	535	0	535	0	535	0	535	0	535	0	535	0	535	0	530	0	535	0	0	534.167	0.561833
12.5481	0	535	0	535	0	530	0	535	0	535	0	535	0	535	0	535	0	535	0	535	0	530	0	535	0	0	534.167	0.561833
12.559	0	535	0	535	0	530	0	535	0	535	0	535	0	535	0	535	0	535	0	535	0	530	0	535	0	0	534.167	0.561833
12.5699	0	535	0	535	0	530	0	535	0	535	0	535	0	535	0	535	0	535	0	535	0	530	0	535	0	0	534.167	0.561833
12.5808	0	535	0	535	0	530	0	535	0	535	0	535	0	535	0	535	0	535	0	535	0	530	0	535	0	0	534.167	0.561833
12.5917	0	535	0	535	0	530	0	535	0	535	0	535	0	535	0	535	0	535	0	535	0	530	0	535	0	0	534.167	0.561833
12.6026	0	535	0	535	0	530	0	535	0	535	0	535	0	535	0	535	0	535	0	535	0	530	0	535	0	0	534.167	0.561833
12.6135	0	535	0	535	0	530	0	535	0	535	0	535	0	535	0	535	0	535	0	535	0	530	0	535	0	0	534.167	0.561833
12.6244	0	535	0	535	0	530	0	535	0	535	0	535	0	535	0	535	0	535	0	535	0	530	0	535	0	0	534.167	0.561833
12.6353	0	535	0	535	0	530	0	535	0	535	0	535	0	535	0	535	0	535	0	535	0	530	0	535	0	0	534.167	0.561833
12.6461	0	535	0	535	0	530	0	535	0	535	0	535	0	535	0	535	0	535	0	535	0	530	0	535	0	0	534.167	0.561833
12.657	0	535	0	535	0	530	0	535	0	535	0	535	0	535	0	535	0	535	0	535	0	530	0	535	0	0	534.167	0.561833
12.6679	0	535	0	535	0	530	0	535	0	535	0	535	0	535	0	535	0	535	0	535	0	530	0	535	0	0	534.167	0.561833
12.6788	0	535	0	535	0	530	0	535	0	535	0	535	0	535	0	535	0	535	0	535	0	530	0	535	0	0	534.167	0.561833
12.6897	0	535	0	535	0	530	0	535	0	535	0	535	0	535	0	535	0	535	0	535	0	530	0	535	0	0	534.167	0.561833
12.7006	0	535	0	535	0	530	0	535	0	535	0	535	0	535	0	535	0	535	0	535	0	530	0	535	0	0	534.167	0.561833
12.7115	0	535	0	535	0	530	0	535	0	535	0	535	0	535	0	535	0	535	0	535	0	530	0	535	0	0	534.167	0.561833
12.7224	0	535	0	535	0	530	0	535	0	535	0	535	0	535	0	535	0	535	0	535	0	530	0	535	0	0	534.167	0.561833
12.7333	0	535	0	535	0	530	0	535	0	535	0	535	0	535	0	535	0	535	0	535	0	530	0	535	0	0	534.167	0.561833
12.7442	0	535	0	535	0	530	0	535	0	535	0	535	0	535	0	535	0	535	0	535	0	530	0	535	0	0	534.167	0.561833
12.7551	0	535	0	535	0	530	0	535	0	535	0	535	0	535	0	535	0	535	0	535	0	530	0	535	0	0	534.167	0.561833
12.766	0	535	0	535	0	530	0	535	0	535	0	535	0	535	0	535	0	535	0	535	0	530	0	535	0	0	534.167	0.561833
12.7769	0	535	0	535	0	530	0	535	0	535	0	535	0	535	0	535	0	535	0	535	0	530	0	535	0	0	534.167	0.561833
12.7877	0	535	0	535	0	530	0	535	0	535	0	535	0	535	0	535	0	535	0	535	0	530	0	535	0	0	534.167	0.561833
12.7986	0	535	0	535	0	530	0	535	0	535	0	535	0	535	0	535	0	535	0	535	0	530	0	535	0	0	534.167	0.561833
12.8095	0	535	0	535	0	530	0	535	0	535	0	535	0	535	0	535	0	535	0	535	0	530	0	535	0	0	534.167	0.561833
12.8204	0	535	0	535	0	530	0	535	0	535	0	535	0	535	0	535	0	535	0	535	0	530	0	535	0	0	534.167	0.561833
12.8313	0	535	0	535	0	530	0	535	0	535	0	535	0	535	0	535	0	535	0	535	0	530	0	535	0	0	534.167	0.561833
12.8422	0	535	0	535	0	530	0	535	0	535	0	535	0	535	0	535	0	535	0	535	0	530	0	535	0	0	534.167	0.561833
12.8531	0	535	0	535	0	530	0	535	0	535	0	535	0	535	0	535	0	535	0	535	0	530	0	535	0	0	534.167	0.561833
12.864	0	535	0	535	0	530	0	535	0	535	0	535	0	535	0	535	0	535	0	535	0	530	0	535	0	0	534.167	0.561833
12.8749	0	535	0	535	0	530	0	535	0	535	0	535	0	535	0	535	0	535	0	535	0	530	0	535	0	0	534.167	0.561833
12.8858	0	535	0	535	0	530	0	535	0	535	0	535	0	535	0	535	0	535	0	535	0	530	0	535	0	0	534.167	0.561833
12.8967	0	535	0	535	0	530	0	535	0	535	0	535	0	535	0	535	0	535	0	535	0	530	0	535	0	0	534.167	0.561833
12.9076	0	535	0	535	0	530	0	535	0	535	0	535	0	535	0	535	0	535	0	535	0	530	0	535	0	0	534.167	0.561833
12.9185	0	535	0	535	0	530	0	535	0	535	0	535	0	535	0	535	0	535	0	535	0	530	0	535	0	0	534.167	0.561833
12.9294	0	535	0	535	0	530	0	535	0	535	0	535	0	535	0	535	0	535	0	535	0	530	0	535	0	0	534.167	0.561833
12.9402	0	535	0	535	0	530	0	535	0	535	0	535	0	535	0	535	0	535	0	535	0	530	0	535	0	0	534.167	0.561833
12.9511	0	535	0	535	0	530	0	535	0	535	0	535	0	535	0	535	0	535	0	535	0	530	0	535	0	0	534.167	0.561833
12.962	0	535	0	535	0	530	0	535	0	535	0	535	0	535	0	535	0	535	0	535	0	530	0	535	0	0	534.167	0.561833
12.9729	0	535	0	535	0	530	0	535	0	535	0	535	0	535	0	535	0	535	0	535	0	530	0	535	0	0	534.167	0.561833
12.9838	0	535	0	535	0	530	0	535	0	535	0	535	0	535	0	535	0	535	0	535	0	530	0	535	0	0	534.167	0.561833
12.9947	0	535	0	535	0	530	0	535	0	535	0	535	0	535	0	535	0	535	0	535	0	530	0	535	0	0	534.167	0.561833
13.0056	0	535	0	535	0	530	0	535	0	535	0	535	0	535	0	535	0	535	0	535	0	530	0	535	0	0	534.167	0.561833
13.0165	0	535	0	535	0	530	0	535	0	535	0	535	0	535	0	535	0	535	0	535	0	530	0	535	0	0	534.167	0.561833
13.0274	0	535	0	535	0	530	0	535	0	535	0	535	0	535	0	535	0	535	0	535	0	530	0	535	0	0	534.167	0.561833
13.0383	0	535	0	535	0	530	0	535	0	535	0	535	0	535	0	535	0	535	0	535	0	530	0	535	0	0	534.167	0.561833
13.0492	0	535	0	535	0	530	0	535	0	535	0	535	0	535	0	535	0	535	0	535	0	530	0	535	0	0	534.167	0.561833
13.0601	0	535	0	535	0	530	0	535	0	535	0	535	0	535	0	535	0	535	0	535	0	530	0	535	0	0	534.167	0.561833
13.071	0	535	0	535	0	530	0	535	0	535	0	535	0	535	0	535	0	535	0	535	0	530	0	535	0	0	534.167	0.561833
13.0818	0	535	0	535	0	530	0	535	0	535	0	535	0	535	0	535	0	535	0	535	0	530	0	535	0	0	534.167	0.561833
13.0927	0	535	0	535	0	530	0	535	0	535	0	535	0	535	0	535	0	535	0	535	0	530	0	535	0	0	534.167	0.561833
13.1036	0	535	0	535	0	530	0	535	0	535	0	535	0	535	0	535	0	535	0	535	0	530	0	535	0	0	534.167	0.561833
13.1145	0	535	0	535	0	530	0	535	0	535	0	535	0	535	0	535	0	535	0	535	0	530	0	535	0	0	534.167	0.561833
13.1254	0	535	0	535	0	530	0	535	0	535	0	535	0	535	0	535	0	535	0	535	0	530	0	535	0	0	534.167	0.561833
13.1363	0	535	0	535	0	530	0	535	0	535	0	535	0	535	0	535	0	535	0	535	0	530	0	535	0	0	534.167	0.561833
13.1472	0	535	0	535	0	530	0	535	0	535	0	535	0	535	0	535	0	535	0	535	0	530	0	535	0	0	534.167	0.561833
13.1581	0	535	0	535	0	530	0	535	0	535	0	535	0	535	0	535	0	535	0	535	0	530	0	535	0	0	534.167	0.561833
13.169	0	535	0	535	0	530	0	535	0	535	0	535	0	535	0	535	0	535	0	535	0	530	0	535	0	0	534.167	0.561833
13.1799	0	535	0	535	0	530	0	535	0	535	0	535	0	535	0	535	0	535	0	535	0	530	0	535	0	0	534.167	0.561833
13.1908	0	535	0	535	0	530	0	535	0	535	0	535	0	535	0	535	0	535	0	535	0	530	0	535	0	0	534.167	0.561833
13.2017	0	535	0	535	0	530	0	535	0	535	0	535	0	535	0	535	0	535	0	535	0	530	0	535	0	0	534.167	0.561833
13.2126	0	535	0	535	0	530	0	535	0	535	0	535	0	535	0	535	0	535	0	535	0	530	0	535	0	0	534.167	0.561833
13.2234	0	535	0	535	0	530	0	535	0	535	0	535	0	535	0	535	0	535	0	535	0	530	0	535	0	0	534.167	0.561833
13.2343	0	535	0	535	0	530	0	535	0	535	0	535	0	535	0	535	0	535	0	535	0	530	0	535	0	0	534.167	0.561833
13.2452	0	535	0	535	0	530	0	535	0	535	0	535	0	535	0	535	0	535	0	535	0	530	0	535	0	0	534.167	0.561833
13.2561	0	535	0	535	0	530	0	535	0	535	0	535	0	535	0	535	0	535	0	535	0	530	0	535	0	0	534.167	0.561833
13.267	0	535	0	535	0	530	0	535	0	535	0	535	0	535	0	535	0	535	0	535	0	530	0	535	0	0	534.167	0.561833
13.2779	0	535	0	535	0	530	0	535	0	535	0	535	0	535	0	535	0	535	0	535	0	530	0	535	0	0	534.167	0.561833
13.2888	0	535	0	535	0	530	0	535	0	535	0	535	0	535	0	535	0	535	0	535	0	530	0	535	0	0	534.167	0.561833
13.2997	0	535	0	535	0	530	0	535	0	535	0	535	0	535	0	535	0	535	0	535	0	530	0	535	0	0	534.167	0.561833
13.3106	0	535	0	535	0	530	0	535	0	535	0	535	0	535	0	535	0	535	0	535	0	530	0	535	0	0	534.167	0.561833
13.3215	0	535	0	535	0	530	0	535	0	535	0	535	0	535	0	535	0	535	0	535	0	530	0	535	0	0	534.167	0.561833
13.3324	0	535	0	535	0	530	0	535	0	535	0	535	0	535	0	535	0	535	0	535	0	530	0	535	0	0	534.167	0.561833
13.3433	0	535	0	535	0	530	0	535	0	535	0	535	0	535	0	535	0	535	0	535	0	530	0	535	0	0	534.167	0.561833
13.3542	0	535	0	535	0	530	0	535	0	535	0	535	0	535	0	535	0	535	0	535	0	530	0	535	0	0	534.167	0.561833
13.365	0	535	0	535	0	530	0	535	0	535	0	535	0	535	0	535	0	535	0	535	0	530	0	535	0	0	534.167	0.561833
13.3759	0	535	0	535	0	530	0	535	0	535	0	535	0	535	0	535	0	535	0	535	0	530	0	535	0	0	534.167	0.561833
13.3868	0	535	0	535	0	530	0	535	0	535	0	535	0	535	0	535	0	535	0	535	0	530	0	535	0	0	534.167	0.561833
13.3977	0	535	0	535	0	530	0	535	0	535	0	535	0	535	0	535	0	535	0	535	0	530	0	535	0	0	534.167	0.561833
13.4086	0	535	0	535	0	530	0	535	0	535	0	535	0	535	0	535	0	535	0	535	0	530	0	535	0	0	534.167	0.561833
13.4195	0	535	0	535	0	530	0	535	0	535	0	535	0	535	0	535	0	535	0	535	0	530	0	535	0	0	534.167	0.561833
13.4304	0	535	0	535	0	530	0	535	0	535	0	535	0	535	0	535	0	535	0	535	0	530	0	535	0	0	534.167	0.561833
13.4413	0	535	0	535	0	530	0	535	0	535	0	535	0	535	0	535	0	535	0	535	0	530	0	535	0	0	534.167	0.561833
13.4522	0	535	0	535	0	530	0	535	0	535	0	535	0	535	0	535	0	535	0	535	0	530	0	535	0	0	534.167	0.561833
13.4631	0	535	0	535	0	530	0	535	0	535	0	535	0	535	0	535	0	535	0	535	0	530	0	535	0	0	534.167	0.561833
13.474	0	535	0	535	0	530	0	535	0	535	0	535	0	535	0	535	0	535	0	535	0	530	0	535	0	0	534.167	0.561833
13.4849	0	535	0	535	0	530	0	535	0	535	0	535	0	535	0	535	0	535	0	535	0	530	0	535	0	0	534.167	0.561833
13.4958	0	535	0	535	0	530	0	535	0	535	0	535	0	535	0	535	0	535	0	535	0	530	0	535	0	0	534.167	0.561833
13.5067	0	535	0	535	0	530	0	535	0	535	0	535	0	535	0	535	0	535	0	535	0	530	0	535	0	0	534.167	0.561833
13.5175	0	535	0	535	0	530	0	535	0	535	0	535	0	535	0	535	0	535	0	535	0	530	0	535	0	0	534.167	0.561833
13.5284	0	535	0	535	0	530	0	535	0	535	0	535	0	535	0	535	0	535	0	535	0	530	0	535	0	0	534.167	0.561833
13.5393	0	535	0	535	0	530	0	535	0	535	0	535	0	535	0	535	0	535	0	535	0	530	0	535	0	0	534.167	0.561833
13.5502	0	535	0	535	0	530	0	535	0	535	0	535	0	535	0	535	0	535	0	535	0	530	0	535	0	0	534.167	0.561833
13.5611	0	535	0	535	0	530	0	535	0	535	0	535	0	535	0	535	0	535	0	535	0	530	0	535	0	0	534.167	0.561833
13.572	0	535	0	535	0	530	0	535	0	535	0	535	0	535	0	535	0	535	0	535	0	530	0	535	0	0	534.167	0.561833
13.5829	0	535	0	535	0	530	0	535	0	535	0	535	0	535	0	535	0	535	0	535	0	530	0	535	0	0	534.167	0.561833
13.5938	0	535	0	535	0	530	0	535	0	535	0	535	0	535	0	535	0	535	0	535	0	530	0	535	0	0	534.167	0.561833
13.6047	0	535	0	535	0	530	0	535	0	535	0	535	0	535	0	535	0	535	0	535	0	530	0	535	0	0	534.167	0.561833
13.6156	0	535	0	535	0	530	0	535	0	535	0	535	0	535	0	535	0	535	0	535	0	530	0	535	0	0	534.167	0.561833
13.6265	0	535	0	535	0	530	0	535	0	535	0	535	0	535	0	535	0	535	0	535	0	530	0	535	0	0	534.167	0.561833
13.6374	0	535	0	535	0	530	0	535	0	535	0	535	0	535	0	535	0	535	0	535	0	530	0	535	0	0	534.167	0.561833
13.6483	0	535	0	535	0	530	0	535	0	535	0	535	0	535	0	535	0	535	0	535	0	530	0	535	0	0	534.167	0.561833
13.6591	0	535	0	535	0	530	0	535	0	535	0	535	0	535	0	535	0	535	0	535	0	530	0	535	0	0	534.167	0.561833
13.67	0	535	0	535	0	530	0	535	0	535	0	535	0	535	0	535	0	535	0	535	0	530	0	535	0	0	534.167	0.561833
13.6809	0	535	0	535	0	530	0	535	0	535	0	535	0	535	0	535	0	535	0	535	0	530	0	535	0	0	534.167	0.561833
13.6918	0	535	0	535	0	530	0	535	0	535	0	535	0	535	0	535	0	535	0	535	0	530	0	535	0	0	534.167	0.561833
13.7027	0	535	0	535	0	530	0	535	0	535	0	535	0	535	0	535	0	535	0	535	0	530	0	535	0	0	534.167	0.561833
13.7136	0	535	0	535	0	530	0	535	0	535	0	535	0	535	0	535	0	535	0	535	0	530	0	535	0	0	534.167	0.561833
13.7245	0	535	0	535	0	530	0	535	0	535	0	535	0	535	0	535	0	535	0	535	0	530	0	535	0	0	534.167	0.561833
13.7354	0	535	0	535	0	530	0	535	0	535	0	535	0	535	0	535	0	535	0	535	0	530	0	535	0	0	534.167	0.561833
13.7463	0	535	0	535	0	530	0	535	0	535	0	535	0	535	0	535	0	535	0	535	0	530	0	535	0	0	534.167	0.561833
13.7572	0	535	0	535	0	530	0	535	0	535	0	535	0	535	0	535	0	535	0	535	0	530	0	535	0	0	534.167	0.561833
13.7681	0	535	0	535	0	530	0	535	0	535	0	535	0	535	0	535	0	535	0	535	0	530	0	535	0	0	534.167	0.561833
13.779	0	535	0	535	0	530	0	535	0	535	0	535	0	535	0	535	0	535	0	535	0	530	0	535	0	0	534.167	0.561833
13.7899	0	535	0	535	0	530	0	535	0	535	0	535	0	535	0	535	0	535	0	535	0	530	0	535	0	0	534.167	0.561833
13.8007	0	535	0	535	0	530	0	535	0	535	0	535	0	535	0	535	0	535	0	535	0	530	0	535	0	0	534.167	0.561833
13.8116	0	535	0	535	0	530	0	535	0	535	0	535	0	535	0	535	0	535	0	535	0	530	0	535	0	0	534.167	0.561833
13.8225	0	535	0	535	0	530	0	535	0	535	0	535	0	535	0	535	0	535	0	535	0	530	0	535	0	0	534.167	0.561833
13.8334	0	535	0	535	0	530	0	535	0	535	0	535	0	535	0	535	0	535	0	535	0	530	0	535	0	0	534.167	0.561833
13.8443	0	535	0	535	0	530	0	535	0	535	0	535	0	535	0	535	0	535	0	535	0	530	0	535	0	0	534.167	0.561833
13.8552	0	535	0	535	0	530	0	535	0	535	0	535	0	535	0	535	0	535	0	535	0	530	0	535	0	0	534.167	0.561833
13.8661	0	535	0	535	0	530	0	535	0	535	0	535	0	535	0	535	0	535	0	535	0	530	0	535	0	0	534.167	0.561833
13.877	0	535	0	535	0	530	0	535	0	535	0	535	0	535	0	535	0	535	0	535	0	530	0	535	0	0	534.167	0.561833
13.8879	0	535	0	535	0	530	0	535	0	535	0	535	0	535	0	535	0	535	0	535	0	530	0	535	0	0	534.167	0.561833
13.8988	0	535	0	535	0	530	0	535	0	535	0	535	0	535	0	535	0	535	0	535	0	530	0	535	0	0	534.167	0.561833
13.9097	0	535	0	535	0	530	0	535	0	535	0	535	0	535	0	535	0	535	0	535	0	530	0	535	0	0	534.167	0.561833
13.9206	0	535	0	535	0	530	0	535	0	535	0	535	0	535	0	535	0	535	0	535	0	530	0	535	0	0	534.167	0.561833
13.9315	0	535	0	535	0	530	0	535	0	535	0	535	0	535	0	535	0	535	0	535	0	530	0	535	0	0	534.167	0.561833
13.9423	0	535	0	535	0	530	0	535	0	535	0	535	0	535	0	535	0	535	0	535	0	530	0	535	0	0	534.167	0.561833
13.9532	0	535	0	535	0	530	0	535	0	535	0	535	0	535	0	535	0	535	0	535	0	530	0	535	0	0	534.167	0.561833
13.9641	0	535	0	535	0	530	0	535	0	535	0	535	0	535	0	535	0	535	0	535	0	530	0	535	0	0	534.167	0.561833
13.975	0	535	0	535	0	530	0	535	0	535	0	535	0	535	0	535	0	535	0	535	0	530	0	535	0	0	534.167	0.561833
13.9859	0	535	0	535	0	530	0	535	0	535	0	535	0	535	0	535	0	535	0	535	0	530	0	535	0	0	534.167	0.561833
13.9968	0	535	0	535	0	530	0	535	0	535	0	535	0	535	0	535	0	535	0	535	0	530	0	535	0	0	534.167	0.561833
14.0077	0	535	0	535	0	530	0	535	0	535	0	535	0	535	0	535	0	535	0	535	0	530	0	535	0	0	534.167	0.561833
14.0186	0	535	0	535	0	530	0	535	0	535	0	535	0	535	0	535	0	535	0	535	0	530	0	535	0	0	534.167	0.561833
14.0295	0	535	0	535	0	530	0	535	0	535	0	535	0	535	0	535	0	535	0	535	0	530	0	535	0	0	534.167	0.561833
14.0404	0	535	0	535	0	530	0	535	0	535	0	535	0	535	0	535	0	535	0	535	0	530	0	535	0	0	534.167	0.561833
14.0513	0	535	0	535	0	530	0	535	0	535	0	535	0	535	0	535	0	535	0	535	0	530	0	535	0	0	534.167	0.561833
14.0622	0	535	0	535	0	530	0	535	0	535	0	535	0	535	0	535	0	535	0	535	0	530	0	535	0	0	534.167	0.561833
14.0731	0	535	0	535	0	530	0	535	0	535	0	535	0	535	0	535	0	535	0	535	0	530	0	535	0	0	534.167	0.561833
14.084	0	535	0	535	0	530	0	535	0	535	0	535	0	535	0	535	0	535	0	535	0	530	0	535	0	0	534.167	0.561833
14.0948	0	535	0	535	0	530	0	535	0	535	0	535	0	535	0	535	0	535	0	535	0	530	0	535	0	0	534.167	0.561833
14.1057	0	535	0	535	0	530	0	535	0	535	0	535	0	535	0	535	0	535	0	535	0	530	0	535	0	0	534.167	0.561833
14.1166	0	535	0	535	0	530	0	535	0	535	0	535	0	535	0	535	0	535	0	535	0	530	0	535	0	0	534.167	0.561833
14.1275	0	535	0	535	0	530	0	535	0	535	0	535	0	535	0	535	0	535	0	535	0	530	0	535	0	0	534.167	0.561833
14.1384	0	535	0	535	0	530	0	535	0	535	0	535	0	535	0	535	0	535	0	535	0	530	0	535	0	0	534.167	0.561833
14.1493	0	535	0	535	0	530	0	535	0	535	0	535	0	535	0	535	0	535	0	535	0	530	0	535	0	0	534.167	0.561833
14.1602	0	535	0	535	0	530	0	535	0	535	0	535	0	535	0	535	0	535	0	535	0	530	0	535	0	0	534.167	0.561833
14.1711	0	535	0	535	0	530	0	535	0	535	0	535	0	535	0	535	0	535	0	535	0	530	0	535	0	0	534.167	0.561833
14.182	0	535	0	535	0	530	0	535	0	535	0	535	0	535	0	535	0	535	0	535	0	530	0	535	0	0	534.167	0.561833
14.1929	0	535	0	535	0	530	0	535	0	535	0	535	0	535	0	535	0	535	0	535	0	530	0	535	0	0	534.167	0.561833
14.2038	0	535	0	535	0	530	0	535	0	535	0	535	0	535	0	535	0	535	0	535	0	530	0	535	0	0	534.167	0.561833
14.2147	0	535	0	535	0	530	0	535	0	535	0	535	0	535	0	535	0	535	0	535	0	530	0	535	0	0	534.167	0.561833
14.2256	0	535	0	535	0	530	0	535	0	535	0	535	0	535	0	535	0	535	0	535	0	530	0	535	0	0	534.167	0.561833
14.2364	0	535	0	535	0	530	0	535	0	535	0	535	0	535	0	535	0	535	0	535	0	530	0	535	0	0	534.167	0.561833
14.2473	0	535	0	535	0	530	0	535	0	535	0	535	0	535	0	535	0	535	0	535	0	530	0	535	0	0	534.167	0.561833
14.2582	0	535	0	535	0	530	0	535	0	535	0	535	0	535	0	535	0	535	0	535	0	530	0	535	0	0	534.167	0.561833
14.2691	0	535	0	535	0	530	0	535	0	535	0	535	0	535	0	535	0	535	0	535	0	530	0	535	0	0	534.167	0.561833
14.28	0	535	0	535	0	530	0	535	0	535	0	535	0	535	0	535	0	535	0	535	0	530	0	535	0	0	534.167	0.561833
14.2909	0	535	0	535	0	530	0	535	0	535	0	535	0	535	0	535	0	535	0	535	0	530	0	535	0	0	534.167	0.561833
14.3018	0	535	0	535	0	530	0	535	0	535	0	535	0	535	0	535	0	535	0	535	0	530	0	535	0	0	534.167	0.561833
14.3127	0	535	0	535	0	530	0	535	0	535	0	535	0	535	0	535	0	535	0	535	0	530	0	535	0	0	534.167	0.561833
14.3236	0	535	0	535	0	530	0	535	0	535	0	535	0	535	0	535	0	535	0	535	0	530	0	535	0	0	534.167	0.561833
14.3345	0	535	0	535	0	530	0	535	0	535	0	535	0	535	0	535	0	535	0	535	0	530	0	535	0	0	534.167	0.561833
14.3454	0	535	0	535	0	530	0	535	0	535	0	535	0	535	0	535	0	535	0	535	0	530	0	535	0	0	534.167	0.561833
14.3563	0	535	0	535	0	530	0	535	0	535	0	535	0	535	0	535	0	535	0	535	0	530	0	535	0	0	534.167	0.561833
14.3672	0	535	0	535	0	530	0	535	0	535	0	535	0	535	0	535	0	535	0	535	0	530	0	535	0	0	534.167	0.561833
14.378	0	535	0	535	0	530	0	535	0	535	0	535	0	535	0	535	0	535	0	535	0	530	0	535	0	0	534.167	0.561833
14.3889	0	535	0	535	0	530	0	535	0	535	0	535	0	535	0	535	0	535	0	535	0	530	0	535	0	0	534.167	0.561833
14.3998	0	535	0	535	0	530	0	535	0	535	0	535	0	535	0	535	0	535	0	535	0	530	0	535	0	0	534.167	0.561833
14.4107	0	535	0	535	0	530	0	535	0	535	0	535	0	535	0	535	0	535	0	535	0	530	0	535	0	0	534.167	0.561833
14.4216	0	535	0	535	0	530	0	535	0	535	0	535	0	535	0	535	0	535	0	535	0	530	0	535	0	0	534.167	0.561833
14.4325	0	535	0	535	0	530	0	535	0	535	0	535	0	535	0	535	0	535	0	535	0	530	0	535	0	0	534.167	0.561833
14.4434	0	535	0	535	0	530	0	535	0	535	0	535	0	535	0	535	0	535	0	535	0	530	0	535	0	0	534.167	0.561833
14.4543	0	535	0	535	0	530	0	535	0	535	0	535	0	535	0	535	0	535	0	535	0	530	0	535	0	0	534.167	0.561833
14.4652	0	535	0	535	0	530	0	535	0	535	0	535	0	535	0	535	0	535	0	535	0	530	0	535	0	0	534.167	0.561833
14.4761	0	535	0	535	0	530	0	535	0	535	0	535	0	535	0	535	0	535	0	535	0	530	0	535	0	0	534.167	0.561833
14.487	0	535	0	535	0	530	0	535	0	535	0	535	0	535	0	535	0	535	0	535	0	530	0	535	0	0	534.167	0.561833
14.4979	0	535	0	535	0	530	0	535	0	535	0	535	0	535	0	535	0	535	0	535	0	530	0	535	0	0	534.167	0.561833
14.5088	0	535	0	535	0	530	0	535	0	535	0	535	0	535	0	535	0	535	0	535	0	530	0	535	0	0	534.167	0.561833
14.5196	0	535	0	535	0	530	0	535	0	535	0	535	0	535	0	535	0	535	0	535	0	530	0	535	0	0	534.167	0.561833
14.5305	0	535	0	535	0	530	0	535	0	535	0	535	0	535	0	535	0	535	0	535	0	530	0	535	0	0	534.167	0.561833
14.5414	0	535	0	535	0	530	0	535	0	535	0	535	0	535	0	535	0	535	0	535	0	530	0	535	0	0	534.167	0.561833
14.5523	0	535	0	535	0	530	0	535	0	535	0	535	0	535	0	535	0	535	0	535	0	530	0	535	0	0	534.167	0.561833
14.5632	0	535	0	535	0	530	0	535	0	535	0	535	0	535	0	535	0	535	0	535	0	530	0	535	0	0	534.167	0.561833
14.5741	0	535	0	535	0	530	0	535	0	535	0	535	0	535	0	535	0	535	0	535	0	530	0	535	0	0	534.167	0.561833
14.585	0	535	0	535	0	530	0	535	0	535	0	535	0	535	0	535	0	535	0	535	0	530	0	535	0	0	534.167	0.561833
14.5959	0	535	0	535	0	530	0	535	0	535	0	535	0	535	0	535	0	535	0	535	0	530	0	535	0	0	534.167	0.561833
14.6068	0	535	0	535	0	530	0	535	0	535	0	535	0	535	0	535	0	535	0	535	0	530	0	535	0	0	534.167	0.561833
14.6177	0	535	0	535	0	530	0	535	0	535	0	535	0	535	0	535	0	535	0	535	0	530	0	535	0	0	534.167	0.561833
14.6286	0	535	0	535	0	530	0	535	0	535	0	535	0	535	0	535	0	535	0	535	0	530	0	535	0	0	534.167	0.561833
14.6395	0	535	0	535	0	530	0	535	0	535	0	535	0	535	0	535	0	535	0	535	0	530	0	535	0	0	534.167	0.561833
14.6504	0	535	0	535	0	530	0	535	0	535	0	535	0	535	0	535	0	535	0	535	0	530	0	535	0	0	534.167	0.561833
14.6613	0	535	0	535	0	530	0	535	0	535	0	535	0	535	0	535	0	535	0	535	0	530	0	535	0	0	534.167	0.561833
14.6721	0	535	0	535	0	530	0	535	0	535	0	535	0	535	0	535	0	535	0	535	0	530	0	535	0	0	534.167	0.561833
14.683	0	535	0	535	0	530	0	535	0	535	0	535	0	535	0	535	0	535	0	535	0	530	0	535	0	0	534.167	0.561833
14.6939	0	535	0	535	0	530	0	535	0	535	0	535	0	535	0	535	0	535	0	535	0	530	0	535	0	0	534.167	0.561833
14.7048	0	535	0	535	0	530	0	535	0	535	0	535	0	535	0	535	0	535	0	535	0	530	0	535	0	0	534.167	0.561833
14.7157	0	535	0	535	0	530	0	535	0	535	0	535	0	535	0	535	0	535	0	535	0	530	0	535	0	0	534.167	0.561833
14.7266	0	535	0	535	0	530	0	535	0	535	0	535	0	535	0	535	0	535	0	535	0	530	0	535	0	0	534.167	0.561833
14.7375	0	535	0	535	0	530	0	535	0	535	0	535	0	535	0	535	0	535	0	535	0	530	0	535	0	0	534.167	0.561833
14.7484	0	535	0	535	0	530	0	535	0	535	0	535	0	535	0	535	0	535	0	535	0	530	0	535	0	0	534.167	0.561833
14.7593	0	535	0	535	0	530	0	535	0	535	0	535	0	535	0	535	0	535	0	535	0	530	0	535	0	0	534.167	0.561833
14.7702	0	535	0	535	0	530	0	535	0	535	0	535	0	535	0	535	0	535	0	535	0	530	0	535	0	0	534.167	0.561833
14.7811	0	535	0	535	0	530	0	535	0	535	0	535	0	535	0	535	0	535	0	535	0	530	0	535	0	0	534.167	0.561833
14.792	0	535	0	535	0	530	0	535	0	535	0	535	0	535	0	535	0	535	0	535	0	530	0	535	0	0	534.167	0.561833
14.8029	0	535	0	535	0	530	0	535	0	535	0	535	0	535	0	535	0	535	0	535	0	530	0	535	0	0	534.167	0.561833
14.8137	0	535	0	535	0	530	0	535	0	535	0	535	0	535	0	535	0	535	0	535	0	530	0	535	0	0	534.167	0.561833
14.8246	0	535	0	535	0	530	0	535	0	535	0	535	0	535	0	535	0	535	0	535	0	530	0	535	0	0	534.167	0.561833
14.8355	0	535	0	535	0	530	0	535	0	535	0	535	0	535	0	535	0	535	0	535	0	530	0	535	0	0	534.167	0.561833
14.8464	0	535	0	535	0	530	0	535	0	535	0	535	0	535	0	535	0	535	0	535	0	530	0	535	0	0	534.167	0.561833
14.8573	0	535	0	535	0	530	0	535	0	535	0	535	0	535	0	535	0	535	0	535	0	530	0	535	0	0	534.167	0.561833
14.8682	0	535	0	535	0	530	0	535	0	535	0	535	0	535	0	535	0	535	0	535	0	530	0	535	0	0	534.167	0.561833
14.8791	0	535	0	535	0	530	0	535	0	535	0	535	0	535	0	535	0	535	0	535	0	530	0	535	0	0	534.167	0.561833
14.89	0	535	0	535	0	530	0	535	0	535	0	535	0	535	0	535	0	535	0	535	0	530	0	535	0	0	534.167	0.561833
14.9009	0	535	0	535	0	530	0	535	0	535	0	535	0	535	0	535	0	535	0	535	0	530	0	535	0	0	534.167	0.561833
14.9118	0	535	0	535	0	530	0	535	0	535	0	535	0	535	0	535	0	535	0	535	0	530	0	535	0	0	534.167	0.561833
14.9227	0	535	0	535	0	530	0	535	0	535	0	535	0	535	0	535	0	535	0	535	0	530	0	535	0	0	534.167	0.561833
14.9336	0	535	0	535	0	530	0	535	0	535	0	535	0	535	0	535	0	535	0	535	0	530	0	535	0	0	534.167	0.561833
14.9445	0	535	0	535	0	530	0	535	0	535	0	535	0	535	0	535	0	535	0	535	0	530	0	535	0	0	534.167	0.561833
14.9553	0	535	0	535	0	530	0	535	0	535	0	535	0	535	0	535	0	535	0	535	0	530	0	535	0	0	534.167	0.561833
14.9662	0	535	0	535	0	530	0	535	0	535	0	535	0	535	0	535	0	535	0	535	0	530	0	535	0	0	534.167	0.561833
14.9771	0	535	0	535	0	530	0	535	0	535	0	535	0	535	0	535	0	535	0	535	0	530	0	535	0	0	534.167	0.561833
14.988	0	535	0	535	0	530	0	535	0	535	0	535	0	535	0	535	0	535	0	535	0	530	0	535	0	0	534.167	0.561833
14.9989	0	535	0	535	0	530	0	535	0	535	0	535	0	535	0	535	0	535	0	535	0	530	0	535	0	0	534.167	0.561833
15.0098	0	535	0	535	0	530	0	535	0	535	0	535	0	535	0	535	0	535	0	535	0	530	0	535	0	0	534.167	0.561833
15.0207	0	535	0	535	0	530	0	535	0	535	0	535	0	535	0	535	0	535	0	535	0	530	0	535	0	0	534.167	0.561833
15.0316	0	535	0	535	0	530	0	535	0	535	0	535	0	535	0	535	0	535	0	535	0	530	0	535	0	0	534.167	0.561833
15.0425	0	535	0	535	0	530	0	535	0	535	0	535	0	535	0	535	0	535	0	535	0	530	0	535	0	0	534.167	0.561833
15.0534	0	535	0	535	0	530	0	535	0	535	0	535	0	535	0	535	0	535	0	535	0	530	0	535	0	0	534.167	0.561833
15.0643	0	535	0	535	0	530	0	535	0	535	0	535	0	535	0	535	0	535	0	535	0	530	0	535	0	0	534.167	0.561833
15.0752	0	535	0	535	0	530	0	535	0	535	0	535	0	535	0	535	0	535	0	535	0	530	0	535	0	0	534.167	0.561833
15.0861	0	535	0	535	0	530	0	535	0	535	0	535	0	535	0	535	0	535	0	535	0	530	0	535	0	0	534.167	0.561833
15.097	0	535	0	535	0	530	0	535	0	535	0	535	0	535	0	535	0	535	0	535	0	530	0	535	0	0	534.167	0.561833
15.1078	0	535	0	535	0	530	0	535	0	535	0	535	0	535	0	535	0	535	0	535	0	530	0	535	0	0	534.167	0.561833
15.1187	0	535	0	535	0	530	0	535	0	535	0	535	0	535	0	535	0	535	0	535	0	530	0	535	0	0	534.167	0.561833
15.1296	0	535	0	535	0	530	0	535	0	535	0	535	0	535	0	535	0	535	0	535	0	530	0	535	0	0	534.167	0.561833
15.1405	0	535	0	535	0	530	0	535	0	535	0	535	0	535	0	535	0	535	0	535	0	530	0	535	0	0	534.167	0.561833
15.1514	0	535	0	535	0	530	0	535	0	535	0	535	0	535	0	535	0	535	0	535	0	530	0	535	0	0	534.167	0.561833
15.1623	0	535	0	535	0	530	0	535	0	535	0	535	0	535	0	535	0	535	0	535	0	530	0	535	0	0	534.167	0.561833
15.1732	0	535	0	535	0	530	0	535	0	535	0	535	0	535	0	535	0	535	0	535	0	530	0	535	0	0	534.167	0.561833
15.1841	0	535	0	535	0	530	0	535	0	535	0	535	0	535	0	535	0	535	0	535	0	530	0	535	0	0	534.167	0.561833
15.195	0	535	0	535	0	530	0	535	0	535	0	535	0	535	0	535	0	535	0	535	0	530	0	535	0	0	534.167	0.561833
15.2059	0	535	0	535	0	530	0	535	0	535	0	535	0	535	0	535	0	535	0	535	0	530	0	535	0	0	534.167	0.561833
15.2168	0	535	0	535	0	530	0	535	0	535	0	535	0	535	0	535	0	535	0	535	0	530	0	535	0	0	534.167	0.561833
15.2277	0	535	0	535	0	530	0	535	0	535	0	535	0	535	0	535	0	535	0	535	0	530	0	535	0	0	534.167	0.561833
15.2386	0	535	0	535	0	530	0	535	0	535	0	535	0	535	0	535	0	535	0	535	0	530	0	535	0	0	534.167	0.561833
15.2494	0	535	0	535	0	530	0	535	0	535	0	535	0	535	0	535	0	535	0	535	0	530	0	535	0	0	534.167	0.561833
15.2603	0	535	0	535	0	530	0	535	0	535	0	535	0	535	0	535	0	535	0	535	0	530	0	535	0	0	534.167	0.561833
15.2712	0	535	0	535	0	530	0	535	0	535	0	535	0	535	0	535	0	535	0	535	0	530	0	535	0	0	534.167	0.561833
15.2821	0	535	0	535	0	530	0	535	0	535	0	535	0	535	0	535	0	535	0	535	0	530	0	535	0	0	534.167	0.561833
15.293	0	535	0	535	0	530	0	535	0	535	0	535	0	535	0	535	0	535	0	535	0	530	0	535	0	0	534.167	0.561833
15.3039	0	535	0	535	0	530	0	535	0	535	0	535	0	535	0	535	0	535	0	535	0	530	0	535	0	0	534.167	0.561833
15.3148	0	535	0	535	0	530	0	535	0	535	0	535	0	535	0	535	0	535	0	535	0	530	0	535	0	0	534.167	0.561833
15.3257	0	535	0	535	0	530	0	535	0	535	0	535	0	535	0	535	0	535	0	535	0	530	0	535	0	0	534.167	0.561833
15.3366	0	535	0	535	0	530	0	535	0	535	0	535	0	535	0	535	0	535	0	535	0	530	0	535	0	0	534.167	0.561833
15.3475	0	535	0	535	0	530	0	535	0	535	0	535	0	535	0	535	0	535	0	535	0	530	0	535	0	0	534.167	0.561833
15.3584	0	535	0	535	0	530	0	535	0	535	0	535	0	535	0	535	0	535	0	535	0	530	0	535	0	0	534.167	0.561833
15.3693	0	535	0	535	0	530	0	535	0	535	0	535	0	535	0	535	0	535	0	535	0	530	0	535	0	0	534.167	0.561833
15.3802	0	535	0	535	0	530	0	535	0	535	0	535	0	535	0	535	0	535	0	535	0	530	0	535	0	0	534.167	0.561833
15.391	0	535	0	535	0	530	0	535	0	535	0	535	0	535	0	535	0	535	0	535	0	530	0	535	0	0	534.167	0.561833
15.4019	0	535	0	535	0	530	0	535	0	535	0	535	0	535	0	535	0	535	0	535	0	530	0	535	0	0	534.167	0.561833
15.4128	0	535	0	535	0	530	0	535	0	535	0	535	0	535	0	535	0	535	0	535	0	530	0	535	0	0	534.167	0.561833
15.4237	0	535	0	535	0	530	0	535	0	535	0	535	0	535	0	535	0	535	0	535	0	530	0	535	0	0	534.167	0.561833
15.4346	0	535	0	535	0	530	0	535	0	535	0	535	0	535	0	535	0	535	0	535	0	530	0	535	0	0	534.167	0.561833
15.4455	0	535	0	535	0	530	0	535	0	535	0	535	0	535	0	535	0	535	0	535	0	530	0	535	0	0	534.167	0.561833
15.4564	0	535	0	535	0	530	0	535	0	535	0	535	0	535	0	535	0	535	0	535	0	530	0	535	0	0	534.167	0.561833
15.4673	0	535	0	535	0	530	0	535	0	535	0	535	0	535	0	535	0	535	0	535	0	530	0	535	0	0	534.167	0.561833
15.4782	0	535	0	535	0	530	0	535	0	535	0	535	0	535	0	535	0	535	0	535	0	530	0	535	0	0	534.167	0.561833
15.4891	0	535	0	535	0	530	0	535	0	535	0	535	0	535	0	535	0	535	0	535	0	530	0	535	0	0	534.167	0.561833
15.5	0	535	0	535	0	530	0	535	0	535	0	535	0	535	0	535	0	535	0	535	0	530	0	535	0	0	534.167	0.561833
15.5109	0	535	0	535	0	530	0	535	0	535	0	535	0	535	0	535	0	535	0	535	0	530	0	535	0	0	534.167	0.561833
15.5218	0	535	0	535	0	530	0	535	0	535	0	535	0	535	0	535	0	535	0	535	0	530	0	535	0	0	534.167	0.561833
15.5326	0	535	0	535	0	530	0	535	0	535	0	535	0	535	0	535	0	535	0	535	0	530	0	535	0	0	534.167	0.561833
15.5435	0	535	0	535	0	530	0	535	0	535	0	535	0	535	0	535	0	535	0	535	0	530	0	535	0	0	534.167	0.561833
15.5544	0	535	0	535	0	530	0	535	0	535	0	535	0	535	0	535	0	535	0	535	0	530	0	535	0	0	534.167	0.561833
15.5653	0	535	0	535	0	530	0	535	0	535	0	535	0	535	0	535	0	535	0	535	0	530	0	535	0	0	534.167	0.561833
15.5762	0	535	0	535	0	530	0	535	0	535	0	535	0	535	0	535	0	535	0	535	0	530	0	535	0	0	534.167	0.561833
15.5871	0	535	0	535	0	530	0	535	0	535	0	535	0	535	0	535	0	535	0	535	0	530	0	535	0	0	534.167	0.561833
15.598	0	535	0	535	0	530	0	535	0	535	0	535	0	535	0	535	0	535	0	535	0	530	0	535	0	0	534.167	0.561833
15.6089	0	535	0	535	0	530	0	535	0	535	0	535	0	535	0	535	0	535	0	535	0	530	0	535	0	0	534.167	0.561833
15.6198	0	535	0	535	0	530	0	535	0	535	0	535	0	535	0	535	0	535	0	535	0	530	0	535	0	0	534.167	0.561833
15.6307	0	535	0	535	0	530	0	535	0	535	0	535	0	535	0	535	0	535	0	535	0	530	0	535	0	0	534.167	0.561833
15.6416	0	535	0	535	0	530	0	535	0	535	0	535	0	535	0	535	0	535	0	535	0	530	0	535	0	0	534.167	0.561833
15.6525	0	535	0	535	0	530	0	535	0	535	0	535	0	535	0	535	0	535	0	535	0	530	0	535	0	0	534.167	0.561833
15.6634	0	535	0	535	0	530	0	535	0	535	0	535	0	535	0	535	0	535	0	535	0	530	0	535	0	0	534.167	0.561833
15.6743	0	535	0	535	0	530	0	535	0	535	0	535	0	535	0	535	0	535	0	535	0	530	0	535	0	0	534.167	0.561833
15.6851	0	535	0	535	0	530	0	535	0	535	0	535	0	535	0	535	0	535	0	535	0	530	0	535	0	0	534.167	0.561833
15.696	0	535	0	535	0	530	0	535	0	535	0	535	0	535	0	535	0	535	0	535	0	530	0	535	0	0	534.167	0.561833
15.7069	0	535	0	535	0	530	0	535	0	535	0	535	0	535	0	535	0	535	0	535	0	530	0	535	0	0	534.167	0.561833
15.7178	0	535	0	535	0	530	0	535	0	535	0	535	0	535	0	535	0	535	0	535	0	530	0	535	0	0	534.167	0.561833
15.7287	0	535	0	535	0	530	0	535	0	535	0	535	0	535	0	535	0	535	0	535	0	530	0	535	0	0	534.167	0.561833
15.7396	0	535	0	535	0	530	0	535	0	535	0	535	0	535	0	535	0	535	0	535	0	530	0	535	0	0	534.167	0.561833
15.7505	0	535	0	535	0	530	0	535	0	535	0	535	0	535	0	535	0	535	0	535	0	530	0	535	0	0	534.167	0.561833
15.7614	0	535	0	535	0	530	0	535	0	535	0	535	0	535	0	535	0	535	0	535	0	530	0	535	0	0	534.167	0.561833
15.7723	0	535	0	535	0	530	0	535	0	535	0	535	0	535	0	535	0	535	0	535	0	530	0	535	0	0	534.167	0.561833
15.7832	0	535	0	535	0	530	0	535	0	535	0	535	0	535	0	535	0	535	0	535	0	530	0	535	0	0	534.167	0.561833
15.7941	0	535	0	535	0	530	0	535	0	535	0	535	0	535	0	535	0	535	0	535	0	530	0	535	0	0	534.167	0.561833
15.805	0	535	0	535	0	530	0	535	0	535	0	535	0	535	0	535	0	535	0	535	0	530	0	535	0	0	534.167	0.561833
15.8159	0	535	0	535	0	530	0	535	0	535	0	535	0	535	0	535	0	535	0	535	0	530	0	535	0	0	534.167	0.561833
15.8267	0	535	0	535	0	530	0	535	0	535	0	535	0	535	0	535	0	535	0	535	0	530	0	535	0	0	534.167	0.561833
15.8376	0	535	0	535	0	530	0	535	0	535	0	535	0	535	0	535	0	535	0	535	0	530	0	535	0	0	534.167	0.561833
15.8485	0	535	0	535	0	530	0	535	0	535	0	535	0	535	0	535	0	535	0	535	0	530	0	535	0	0	534.167	0.561833
15.8594	0	535	0	535	0	530	0	535	0	535	0	535	0	535	0	535	0	535	0	535	0	530	0	535	0	0	534.167	0.561833
15.8703	0	535	0	535	0	530	0	535	0	535	0	535	0	535	0	535	0	535	0	535	0	530	0	535	0	0	534.167	0.561833
15.8812	0	535	0	535	0	530	0	535	0	535	0	535	0	535	0	535	0	535	0	535	0	530	0	535	0	0	534.167	0.561833
15.8921	0	535	0	535	0	530	0	535	0	535	0	535	0	535	0	535	0	535	0	535	0	530	0	535	0	0	534.167	0.561833
15.903	0	535	0	535	0	530	0	535	0	535	0	535	0	535	0	535	0	535	0	535	0	530	0	535	0	0	534.167	0.561833
15.9139	0	535	0	535	0	530	0	535	0	535	0	535	0	535	0	535	0	535	0	535	0	530	0	535	0	0	534.167	0.561833
15.9248	0	535	0	535	0	530	0	535	0	535	0	535	0	535	0	535	0	535	0	535	0	530	0	535	0	0	534.167	0.561833
15.9357	0	535	0	535	0	530	0	535	0	535	0	535	0	535	0	535	0	535	0	535	0	530	0	535	0	0	534.167	0.561833
15.9466	0	535	0	535	0	530	0	535	0	535	0	535	0	535	0	535	0	535	0	535	0	530	0	535	0	0	534.167	0.561833
15.9575	0	535	0	535	0	530	0	535	0	535	0	535	0	535	0	535	0	535	0	535	0	530	0	535	0	0	534.167	0.561833
15.9683	0	535	0	535	0	530	0	535	0	535	0	535	0	535	0	535	0	535	0	535	0	530	0	535	0	0	534.167	0.561833
15.9792	0	535	0	535	0	530	0	535	0	535	0	535	0	535	0	535	0	535	0	535	0	530	0	535	0	0	534.167	0.561833
15.9901	0	535	0	535	0	530	0	535	0	535	0	535	0	535	0	535	0	535	0	535	0	530	0	535	0	0	534.167	0.561833
16.001	0	535	0	535	0	530	0	535	0	535	0	535	0	535	0	535	0	535	0	535	0	530	0	535	0	0	534.167	0.561833
16.0119	0	535	0	535	0	530	0	535	0	535	0	535	0	535	0	535	0	535	0	535	0	530	0	535	0	0	534.167	0.561833
16.0228	0	535	0	535	0	530	0	535	0	535	0	535	0	535	0	535	0	535	0	535	0	530	0	535	0	0	534.167	0.561833
16.0337	0	535	0	535	0	530	0	535	0	535	0	535	0	535	0	535	0	535	0	535	0	530	0	535	0	0	534.167	0.561833
16.0446	0	535	0	535	0	530	0	535	0	535	0	535	0	535	0	535	0	535	0	535	0	530	0	535	0	0	534.167	0.561833
16.0555	0	535	0	535	0	530	0	535	0	535	0	535	0	535	0	535	0	535	0	535	0	530	0	535	0	0	534.167	0.561833
16.0664	0	535	0	535	0	530	0	535	0	535	0	535	0	535	0	535	0	535	0	535	0	530	0	535	0	0	534.167	0.561833
16.0773	0	535	0	535	0	530	0	535	0	535	0	535	0	535	0	535	0	535	0	535	0	530	0	535	0	0	534.167	0.561833
16.0882	0	535	0	535	0	530	0	535	0	535	0	535	0	535	0	535	0	535	0	535	0	530	0	535	0	0	534.167	0.561833
16.0991	0	535	0	535	0	530	0	535	0	535	0	535	0	535	0	535	0	535	0	535	0	530	0	535	0	0	534.167	0.561833
16.1099	0	535	0	535	0	530	0	535	0	535	0	535	0	535	0	535	0	535	0	535	0	530	0	535	0	0	534.167	0.561833
16.1208	0	535	0	535	0	530	0	535	0	535	0	535	0	535	0	535	0	535	0	535	0	530	0	535	0	0	534.167	0.561833
16.1317	0	535	0	535	0	530	0	535	0	535	0	535	0	535	0	535	0	535	0	535	0	530	0	535	0	0	534.167	0.561833
16.1426	0	535	0	535	0	530	0	535	0	535	0	535	0	535	0	535	0	535	0	535	0	530	0	535	0	0	534.167	0.561833
16.1535	0	535	0	535	0	530	0	535	0	535	0	535	0	535	0	535	0	535	0	535	0	530	0	535	0	0	534.167	0.561833
16.1644	0	535	0	535	0	530	0	535	0	535	0	535	0	535	0	535	0	535	0	535	0	530	0	535	0	0	534.167	0.561833
16.1753	0	535	0	535	0	530	0	535	0	535	0	535	0	535	0	535	0	535	0	535	0	530	0	535	0	0	534.167	0.561833
16.1862	0	535	0	535	0	530	0	535	0	535	0	535	0	535	0	535	0	535	0	535	0	530	0	535	0	0	534.167	0.561833
16.1971	0	535	0	535	0	530	0	535	0	535	0	535	0	535	0	535	0	535	0	535	0	530	0	535	0	0	534.167	0.561833
16.208	0	535	0	535	0	530	0	535	0	535	0	535	0	535	0	535	0	535	0	535	0	530	0	535	0	0	534.167	0.561833
16.2189	0	535	0	535	0	530	0	535	0	535	0	535	0	535	0	535	0	535	0	535	0	530	0	535	0	0	534.167	0.561833
16.2298	0	535	0	535	0	530	0	535	0	535	0	535	0	535	0	535	0	535	0	535	0	530	0	535	0	0	534.167	0.561833
16.2407	0	535	0	535	0	530	0	535	0	535	0	535	0	535	0	535	0	535	0	535	0	530	0	535	0	0	534.167	0.561833
16.2516	0	535	0	535	0	530	0	535	0	535	0	535	0	535	0	535	0	535	0	535	0	530	0	535	0	0	534.167	0.561833
16.2624	0	535	0	535	0	530	0	535	0	535	0	535	0	535	0	535	0	535	0	535	0	530	0	535	0	0	534.167	0.561833
16.2733	0	535	0	535	0	530	0	535	0	535	0	535	0	535	0	535	0	535	0	535	0	530	0	535	0	0	534.167	0.561833
16.2842	0	535	0	535	0	530	0	535	0	535	0	535	0	535	0	535	0	535	0	535	0	530	0	535	0	0	534.167	0.561833
16.2951	0	535	0	535	0	530	0	535	0	535	0	535	0	535	0	535	0	535	0	535	0	530	0	535	0	0	534.167	0.561833
16.306	0	535	0	535	0	530	0	535	0	535	0	535	0	535	0	535	0	535	0	535	0	530	0	535	0	0	534.167	0.561833
16.3169	0	535	0	535	0	530	0	535	0	535	0	535	0	535	0	535	0	535	0	535	0	530	0	535	0	0	534.167	0.561833
16.3278	0	535	0	535	0	530	0	535	0	535	0	535	0	535	0	535	0	535	0	535	0	530	0	535	0	0	534.167	0.561833
16.3387	0	535	0	535	0	530	0	535	0	535	0	535	0	535	0	535	0	535	0	535	0	530	0	535	0	0	534.167	0.561833
16.3496	0	535	0	535	0	530	0	535	0	535	0	535	0	535	0	535	0	535	0	535	0	530	0	535	0	0	534.167	0.561833
16.3605	0	535	0	535	0	530	0	535	0	535	0	535	0	535	0	535	0	535	0	535	0	530	0	535	0	0	534.167	0.561833
16.3714	0	535	0	535	0	530	0	535	0	535	0	535	0	535	0	535	0	535	0	535	0	530	0	535	0	0	534.167	0.561833
16.3823	0	535	0	535	0	530	0	535	0	535	0	535	0	535	0	535	0	535	0	535	0	530	0	535	0	0	534.167	0.561833
16.3932	0	535	0	535	0	530	0	535	0	535	0	535	0	535	0	535	0	535	0	535	0	530	0	535	0	0	534.167	0.561833
16.404	0	535	0	535	0	530	0	535	0	535	0	535	0	535	0	535	0	535	0	535	0	530	0	535	0	0	534.167	0.561833
16.4149	0	535	0	535	0	530	0	535	0	535	0	535	0	535	0	535	0	535	0	535	0	530	0	535	0	0	534.167	0.561833
16.4258	0	535	0	535	0	530	0	535	0	535	0	535	0	535	0	535	0	535	0	535	0	530	0	535	0	0	534.167	0.561833
16.4367	0	535	0	535	0	530	0	535	0	535	0	535	0	535	0	535	0	535	0	535	0	530	0	535	0	0	534.167	0.561833
16.4476	0	535	0	535	0	530	0	535	0	535	0	535	0	535	0	535	0	535	0	535	0	530	0	535	0	0	534.167	0.561833
16.4585	0	535	0	535	0	530	0	535	0	535	0	535	0	535	0	535	0	535	0	535	0	530	0	535	0	0	534.167	0.561833
16.4694	0	535	0	535	0	530	0	535	0	535	0	535	0	535	0	535	0	535	0	535	0	530	0	535	0	0	534.167	0.561833
16.4803	0	535	0	535	0	530	0	535	0	535	0	535	0	535	0	535	0	535	0	535	0	530	0	535	0	0	534.167	0.561833
16.4912	0	535	0	535	0	530	0	535	0	535	0	535	0	535	0	535	0	535	0	535	0	530	0	535	0	0	534.167	0.561833
16.5021	0	535	0	535	0	530	0	535	0	535	0	535	0	535	0	535	0	535	0	535	0	530	0	535	0	0	534.167	0.561833
16.513	0	535	0	535	0	530	0	535	0	535	0	535	0	535	0	535	0	535	0	535	0	530	0	535	0	0	534.167	0.561833
16.5239	0	535	0	535	0	530	0	535	0	535	0	535	0	535	0	535	0	535	0	535	0	530	0	535	0	0	534.167	0.561833
16.5348	0	535	0	535	0	530	0	535	0	535	0	535	0	535	0	535	0	535	0	535	0	530	0	535	0	0	534.167	0.561833
16.5456	0	535	0	535	0	530	0	535	0	535	0	535	0	535	0	535	0	535	0	535	0	530	0	535	0	0	534.167	0.561833
16.5565	0	535	0	535	0	530	0	535	0	535	0	535	0	535	0	535	0	535	0	535	0	530	0	535	0	0	534.167	0.561833
16.5674	0	535	0	535	0	530	0	535	0	535	0	535	0	535	0	535	0	535	0	535	0	530	0	535	0	0	534.167	0.561833
16.5783	0	535	0	535	0	530	0	535	0	535	0	535	0	535	0	535	0	535	0	535	0	530	0	535	0	0	534.167	0.561833
16.5892	0	535	0	535	0	530	0	535	0	535	0	535	0	535	0	535	0	535	0	535	0	530	0	535	0	0	534.167	0.561833
16.6001	0	535	0	535	0	530	0	535	0	535	0	535	0	535	0	535	0	535	0	535	0	530	0	535	0	0	534.167	0.561833
16.611	0	535	0	535	0	530	0	535	0	535	0	535	0	535	0	535	0	535	0	535	0	530	0	535	0	0	534.167	0.561833
16.6219	0	535	0	535	0	530	0	535	0	535	0	535	0	535	0	535	0	535	0	535	0	530	0	535	0	0	534.167	0.561833
16.6328	0	535	0	535	0	530	0	535	0	535	0	535	0	535	0	535	0	535	0	535	0	530	0	535	0	0	534.167	0.561833
16.6437	0	535	0	535	0	530	0	535	0	535	0	535	0	535	0	535	0	535	0	535	0	530	0	535	0	0	534.167	0.561833
16.6546	0	535	0	535	0	530	0	535	0	535	0	535	0	535	0	535	0	535	0	535	0	530	0	535	0	0	534.167	0.561833
16.6655	0	535	0	535	0	530	0	535	0	535	0	535	0	535	0	535	0	535	0	535	0	530	0	535	0	0	534.167	0.561833
16.6764	0	535	0	535	0	530	0	535	0	535	0	535	0	535	0	535	0	535	0	535	0	530	0	535	0	0	534.167	0.561833
16.6872	0	535	0	535	0	530	0	535	0	535	0	535	0	535	0	535	0	535	0	535	0	530	0	535	0	0	534.167	0.561833
16.6981	0	535	0	535	0	530	0	535	0	535	0	535	0	535	0	535	0	535	0	535	0	530	0	535	0	0	534.167	0.561833
16.709	0	535	0	535	0	530	0	535	0	535	0	535	0	535	0	535	0	535	0	535	0	530	0	535	0	0	534.167	0.561833
16.7199	0	535	0	535	0	530	0	535	0	535	0	535	0	535	0	535	0	535	0	535	0	530	0	535	0	0	534.167	0.561833
16.7308	0	535	0	535	0	530	0	535	0	535	0	535	0	535	0	535	0	535	0	535	0	530	0	535	0	0	534.167	0.561833
16.7417	0	535	0	535	0	530	0	535	0	535	0	535	0	535	0	535	0	535	0	535	0	530	0	535	0	0	534.167	0.561833
16.7526	0	535	0	535	0	530	0	535	0	535	0	535	0	535	0	535	0	535	0	535	0	530	0	535	0	0	534.167	0.561833
16.7635	0	535	0	535	0	530	0	535	0	535	0	535	0	535	0	535	0	535	0	535	0	530	0	535	0	0	534.167	0.561833
16.7744	0	535	0	535	0	530	0	535	0	535	0	535	0	535	0	535	0	535	0	535	0	530	0	535	0	0	534.167	0.561833
16.7853	0	535	0	535	0	530	0	535	0	535	0	535	0	535	0	535	0	535	0	535	0	530	0	535	0	0	534.167	0.561833
16.7962	0	535	0	535	0	530	0	535	0	535	0	535	0	535	0	535	0	535	0	535	0	530	0	535	0	0	534.167	0.561833
16.8071	0	535	0	535	0	530	0	535	0	535	0	535	0	535	0	535	0	535	0	535	0	530	0	535	0	0	534.167	0.561833
16.818	0	535	0	535	0	530	0	535	0	535	0	535	0	535	0	535	0	535	0	535	0	530	0	535	0	0	534.167	0.561833
16.8289	0	535	0	535	0	530	0	535	0	535	0	535	0	535	0	535	0	535	0	535	0	530	0	535	0	0	534.167	0.561833
16.8397	0	535	0	535	0	530	0	535	0	535	0	535	0	535	0	535	0	535	0	535	0	530	0	535	0	0	534.167	0.561833
16.8506	0	535	0	535	0	530	0	535	0	535	0	535	0	535	0	535	0	535	0	535	0	530	0	535	0	0	534.167	0.561833
16.8615	0	535	0	535	0	530	0	535	0	535	0	535	0	535	0	535	0	535	0	535	0	530	0	535	0	0	534.167	0.561833
16.8724	0	535	0	535	0	530	0	535	0	535	0	535	0	535	0	535	0	535	0	535	0	530	0	535	0	0	534.167	0.561833
16.8833	0	535	0	535	0	530	0	535	0	535	0	535	0	535	0	535	0	535	0	535	0	530	0	535	0	0	534.167	0.561833
16.8942	0	535	0	535	0	530	0	535	0	535	0	535	0	535	0	535	0	535	0	535	0	530	0	535	0	0	534.167	0.561833
16.9051	0	535	0	535	0	530	0	535	0	535	0	535	0	535	0	535	0	535	0	535	0	530	0	535	0	0	534.167	0.561833
16.916	0	535	0	535	0	530	0	535	0	535	0	535	0	535	0	535	0	535	0	535	0	530	0	535	0	0	534.167	0.561833
16.9269	0	535	0	535	0	530	0	535	0	535	0	535	0	535	0	535	0	535	0	535	0	530	0	535	0	0	534.167	0.561833
16.9378	0	535	0	535	0	530	0	535	0	535	0	535	0	535	0	535	0	535	0	535	0	530	0	535	0	0	534.167	0.561833
16.9487	0	535	0	535	0	530	0	535	0	535	0	535	0	535	0	535	0	535	0	535	0	530	0	535	0	0	534.167	0.561833
16.9596	0	535	0	535	0	530	0	535	0	535	0	535	0	535	0	535	0	535	0	535	0	530	0	535	0	0	534.167	0.561833
16.9705	0	535	0	535	0	530	0	535	0	535	0	535	0	535	0	535	0	535	0	535	0	530	0	535	0	0	534.167	0.561833
16.9813	0	535	0	535	0	530	0	535	0	535	0	535	0	535	0	535	0	535	0	535	0	530	0	535	0	0	534.167	0.561833
16.9922	0	535	0	535	0	530	0	535	0	535	0	535	0	535	0	535	0	535	0	535	0	530	0	535	0	0	534.167	0.561833
17.0031	0	535	0	535	0	530	0	535	0	535	0	535	0	535	0	535	0	535	0	535	0	530	0	535	0	0	534.167	0.561833
17.014	0	535	0	535	0	530	0	535	0	535	0	535	0	535	0	535	0	535	0	535	0	530	0	535	0	0	534.167	0.561833
17.0249	0	535	0	535	0	530	0	535	0	535	0	535	0	535	0	535	0	535	0	535	0	530	0	535	0	0	534.167	0.561833
17.0358	0	535	0	535	0	530	0	535	0	535	0	535	0	535	0	535	0	535	0	535	0	530	0	535	0	0	534.167	0.561833
17.0467	0	535	0	535	0	530	0	535	0	535	0	535	0	535	0	535	0	535	0	535	0	530	0	535	0	0	534.167	0.561833
17.0576	0	535	0	535	0	530	0	535	0	535	0	535	0	535	0	535	0	535	0	535	0	530	0	535	0	0	534.167	0.561833
17.0685	0	535	0	535	0	530	0	535	0	535	0	535	0	535	0	535	0	535	0	535	0	530	0	535	0	0	534.167	0.561833
17.0794	0	535	0	535	0	530	0	535	0	535	0	535	0	535	0	535	0	535	0	535	0	530	0	535	0	0	534.167	0.561833
17.0903	0	535	0	535	0	530	0	535	0	535	0	535	0	535	0	535	0	535	0	535	0	530	0	535	0	0	534.167	0.561833
17.1012	0	535	0	535	0	530	0	535	0	535	0	535	0	535	0	535	0	535	0	535	0	530	0	535	0	0	534.167	0.561833
17.1121	0	535	0	535	0	530	0	535	0	535	0	535	0	535	0	535	0	535	0	535	0	530	0	535	0	0	534.167	0.561833
17.1229	0	535	0	535	0	530	0	535	0	535	0	535	0	535	0	535	0	535	0	535	0	530	0	535	0	0	534.167	0.561833
17.1338	0	535	0	535	0	530	0	535	0	535	0	535	0	535	0	535	0	535	0	535	0	530	0	535	0	0	534.167	0.561833
17.1447	0	535	0	535	0	530	0	535	0	535	0	535	0	535	0	535	0	535	0	535	0	530	0	535	0	0	534.167	0.561833
17.1556	0	535	0	535	0	530	0	535	0	535	0	535	0	535	0	535	0	535	0	535	0	530	0	535	0	0	534.167	0.561833
17.1665	0	535	0	535	0	530	0	535	0	535	0	535	0	535	0	535	0	535	0	535	0	530	0	535	0	0	534.167	0.561833
17.1774	0	535	0	535	0	530	0	535	0	535	0	535	0	535	0	535	0	535	0	535	0	530	0	535	0	0	534.167	0.561833
17.1883	0	535	0	535	0	530	0	535	0	535	0	535	0	535	0	535	0	535	0	535	0	530	0	535	0	0	534.167	0.561833
17.1992	0	535	0	535	0	530	0	535	0	535	0	535	0	535	0	535	0	535	0	535	0	530	0	535	0	0	534.167	0.561833
17.2101	0	535	0	535	0	530	0	535	0	535	0	535	0	535	0	535	0	535	0	535	0	530	0	535	0	0	534.167	0.561833
17.221	0	535	0	535	0	530	0	535	0	535	0	535	0	535	0	535	0	535	0	535	0	530	0	535	0	0	534.167	0.561833
17.2319	0	535	0	535	0	530	0	535	0	535	0	535	0	535	0	535	0	535	0	535	0	530	0	535	0	0	534.167	0.561833
17.2428	0	535	0	535	0	530	0	535	0	535	0	535	0	535	0	535	0	535	0	535	0	530	0	535	0	0	534.167	0.561833
17.2537	0	535	0	535	0	530	0	535	0	535	0	535	0	535	0	535	0	535	0	535	0	530	0	535	0	0	534.167	0.561833
17.2645	0	535	0	535	0	530	0	535	0	535	0	535	0	535	0	535	0	535	0	535	0	530	0	535	0	0	534.167	0.561833
17.2754	0	535	0	535	0	530	0	535	0	535	0	535	0	535	0	535	0	535	0	535	0	530	0	535	0	0	534.167	0.561833
17.2863	0	535	0	535	0	530	0	535	0	535	0	535	0	535	0	535	0	535	0	535	0	530	0	535	0	0	534.167	0.561833
17.2972	0	535	0	535	0	530	0	535	0	535	0	535	0	535	0	535	0	535	0	535	0	530	0	535	0	0	534.167	0.561833
17.3081	0	535	0	535	0	530	0	535	0	535	0	535	0	535	0	535	0	535	0	535	0	530	0	535	0	0	534.167	0.561833
17.319	0	535	0	535	0	530	0	535	0	535	0	535	0	535	0	535	0	535	0	535	0	530	0	535	0	0	534.167	0.561833
17.3299	0	535	0	535	0	530	0	535	0	535	0	535	0	535	0	535	0	535	0	535	0	530	0	535	0	0	534.167	0.561833
17.3408	0	535	0	535	0	530	0	535	0	535	0	535	0	535	0	535	0	535	0	535	0	530	0	535	0	0	534.167	0.561833
17.3517	0	535	0	535	0	530	0	535	0	535	0	535	0	535	0	535	0	535	0	535	0	530	0	535	0	0	534.167	0.561833
17.3626	0	535	0	535	0	530	0	535	0	535	0	535	0	535	0	535	0	535	0	535	0	530	0	535	0	0	534.167	0.561833
17.3735	0	535	0	535	0	530	0	535	0	535	0	535	0	535	0	535	0	535	0	535	0	530	0	535	0	0	534.167	0.561833
17.3844	0	535	0	535	0	530	0	535	0	535	0	535	0	535	0	535	0	535	0	535	0	530	0	535	0	0	534.167	0.561833
17.3953	0	535	0	535	0	530	0	535	0	535	0	535	0	535	0	535	0	535	0	535	0	530	0	535	0	0	534.167	0.561833
17.4062	0	535	0	535	0	530	0	535	0	535	0	535	0	535	0	535	0	535	0	535	0	530	0	535	0	0	534.167	0.561833
17.417	0	535	0	535	0	530	0	535	0	535	0	535	0	535	0	535	0	535	0	535	0	530	0	535	0	0	534.167	0.561833
17.4279	0	535	0	535	0	530	0	535	0	535	0	535	0	535	0	535	0	535	0	535	0	530	0	535	0	0	534.167	0.561833
17.4388	0	535	0	535	0	530	0	535	0	535	0	535	0	535	0	535	0	535	0	535	0	530	0	535	0	0	534.167	0.561833
17.4497	0	535	0	535	0	530	0	535	0	535	0	535	0	535	0	535	0	535	0	535	0	530	0	535	0	0	534.167	0.561833
17.4606	0	535	0	535	0	530	0	535	0	535	0	535	0	535	0	535	0	535	0	535	0	530	0	535	0	0	534.167	0.561833
17.4715	0	535	0	535	0	530	0	535	0	535	0	535	0	535	0	535	0	535	0	535	0	530	0	535	0	0	534.167	0.561833
17.4824	0	535	0	535	0	530	0	535	0	535	0	535	0	535	0	535	0	535	0	535	0	530	0	535	0	0	534.167	0.561833
17.4933	0	535	0	535	0	530	0	535	0	535	0	535	0	535	0	535	0	535	0	535	0	530	0	535	0	0	534.167	0.561833
17.5042	0	535	0	535	0	530	0	535	0	535	0	535	0	535	0	535	0	535	0	535	0	530	0	535	0	0	534.167	0.561833
17.5151	0	535	0	535	0	530	0	535	0	535	0	535	0	535	0	535	0	535	0	535	0	530	0	535	0	0	534.167	0.561833
17.526	0	535	0	535	0	530	0	535	0	535	0	535	0	535	0	535	0	535	0	535	0	530	0	535	0	0	534.167	0.561833
17.5369	0	535	0	535	0	530	0	535	0	535	0	535	0	535	0	535	0	535	0	535	0	530	0	535	0	0	534.167	0.561833
17.5478	0	535	0	535	0	530	0	535	0	535	0	535	0	535	0	535	0	535	0	535	0	530	0	535	0	0	534.167	0.561833
17.5586	0	535	0	535	0	530	0	535	0	535	0	535	0	535	0	535	0	535	0	535	0	530	0	535	0	0	534.167	0.561833
17.5695	0	535	0	535	0	530	0	535	0	535	0	535	0	535	0	535	0	535	0	535	0	530	0	535	0	0	534.167	0.561833
17.5804	0	535	0	535	0	530	0	535	0	535	0	535	0	535	0	535	0	535	0	535	0	530	0	535	0	0	534.167	0.561833
17.5913	0	535	0	535	0	530	0	535	0	535	0	535	0	535	0	535	0	535	0	535	0	530	0	535	0	0	534.167	0.561833
17.6022	0	535	0	535	0	530	0	535	0	535	0	535	0	535	0	535	0	535	0	535	0	530	0	535	0	0	534.167	0.561833
17.6131	0	535	0	535	0	530	0	535	0	535	0	535	0	535	0	535	0	535	0	535	0	530	0	535	0	0	534.167	0.561833
17.624	0	535	0	535	0	530	0	535	0	535	0	535	0	535	0	535	0	535	0	535	0	530	0	535	0	0	534.167	0.561833
17.6349	0	535	0	535	0	530	0	535	0	535	0	535	0	535	0	535	0	535	0	535	0	530	0	535	0	0	534.167	0.561833
17.6458	0	535	0	535	0	530	0	535	0	535	0	535	0	535	0	535	0	535	0	535	0	530	0	535	0	0	534.167	0.561833
17.6567	0	535	0	535	0	530	0	535	0	535	0	535	0	535	0	535	0	535	0	535	0	530	0	535	0	0	534.167	0.561833
17.6676	0	535	0	535	0	530	0	535	0	535	0	535	0	535	0	535	0	535	0	535	0	530	0	535	0	0	534.167	0.561833
17.6785	0	535	0	535	0	530	0	535	0	535	0	535	0	535	0	535	0	535	0	535	0	530	0	535	0	0	534.167	0.561833
17.6894	0	535	0	535	0	530	0	535	0	535	0	535	0	535	0	535	0	535	0	535	0	530	0	535	0	0	534.167	0.561833
17.7002	0	535	0	535	0	530	0	535	0	535	0	535	0	535	0	535	0	535	0	535	0	530	0	535	0	0	534.167	0.561833
17.7111	0	535	0	535	0	530	0	535	0	535	0	535	0	535	0	535	0	535	0	535	0	530	0	535	0	0	534.167	0.561833
17.722	0	535	0	535	0	530	0	535	0	535	0	535	0	535	0	535	0	535	0	535	0	530	0	535	0	0	534.167	0.561833
17.7329	0	535	0	535	0	530	0	535	0	535	0	535	0	535	0	535	0	535	0	535	0	530	0	535	0	0	534.167	0.561833
17.7438	0	535	0	535	0	530	0	535	0	535	0	535	0	535	0	535	0	535	0	535	0	530	0	535	0	0	534.167	0.561833
17.7547	0	535	0	535	0	530	0	535	0	535	0	535	0	535	0	535	0	535	0	535	0	530	0	535	0	0	534.167	0.561833
17.7656	0	535	0	535	0	530	0	535	0	535	0	535	0	535	0	535	0	535	0	535	0	530	0	535	0	0	534.167	0.561833
17.7765	0	535	0	535	0	530	0	535	0	535	0	535	0	535	0	535	0	535	0	535	0	530	0	535	0	0	534.167	0.561833
17.7874	0	535	0	535	0	530	0	535	0	535	0	535	0	535	0	535	0	535	0	535	0	530	0	535	0	0	534.167	0.561833
17.7983	0	535	0	535	0	530	0	535	0	535	0	535	0	535	0	535	0	535	0	535	0	530	0	535	0	0	534.167	0.561833
17.8092	0	535	0	535	0	530	0	535	0	535	0	535	0	535	0	535	0	535	0	535	0	530	0	535	0	0	534.167	0.561833
17.8201	0	535	0	535	0	530	0	535	0	535	0	535	0	535	0	535	0	535	0	535	0	530	0	535	0	0	534.167	0.561833
17.831	0	535	0	535	0	530	0	535	0	535	0	535	0	535	0	535	0	535	0	535	0	530	0	535	0	0	534.167	0.561833
17.8418	0	535	0	535	0	530	0	535	0	535	0	535	0	535	0	535	0	535	0	535	0	530	0	535	0	0	534.167	0.561833
17.8527	0	535	0	535	0	530	0	535	0	535	0	535	0	535	0	535	0	535	0	535	0	530	0	535	0	0	534.167	0.561833
17.8636	0	535	0	535	0	530	0	535	0	535	0	535	0	535	0	535	0	535	0	535	0	530	0	535	0	0	534.167	0.561833
17.8745	0	535	0	535	0	530	0	535	0	535	0	535	0	535	0	535	0	535	0	535	0	530	0	535	0	0	534.167	0.561833
17.8854	0	535	0	535	0	530	0	535	0	535	0	535	0	535	0	535	0	535	0	535	0	530	0	535	0	0	534.167	0.561833
17.8963	0	535	0	535	0	530	0	535	0	535	0	535	0	535	0	535	0	535	0	535	0	530	0	535	0	0	534.167	0.561833
17.9072	0	535	0	535	0	530	0	535	0	535	0	535	0	535	0	535	0	535	0	535	0	530	0	535	0	0	534.167	0.561833
17.9181	0	535	0	535	0	530	0	535	0	535	0	535	0	535	0	535	0	535	0	535	0	530	0	535	0	0	534.167	0.561833
17.929	0	535	0	535	0	530	0	535	0	535	0	535	0	535	0	535	0	535	0	535	0	530	0	535	0	0	534.167	0.561833
17.9399	0	535	0	535	0	530	0	535	0	535	0	535	0	535	0	535	0	535	0	535	0	530	0	535	0	0	534.167	0.561833
17.9508	0	535	0	535	0	530	0	535	0	535	0	535	0	535	0	535	0	535	0	535	0	530	0	535	0	0	534.167	0.561833
17.9617	0	535	0	535	0	530	0	535	0	535	0	535	0	535	0	535	0	535	0	535	0	530	0	535	0	0	534.167	0.561833
17.9726	0	535	0	535	0	530	0	535	0	535	0	535	0	535	0	535	0	535	0	535	0	530	0	535	0	0	534.167	0.561833
17.9835	0	535	0	535	0	530	0	535	0	535	0	535	0	535	0	535	0	535	0	535	0	530	0	535	0	0	534.167	0.561833
17.9943	0	535	0	535	0	530	0	535	0	535	0	535	0	535	0	535	0	535	0	535	0	530	0	535	0	0	534.167	0.561833
18.0052	0	535	0	535	0	530	0	535	0	535	0	535	0	535	0	535	0	535	0	535	0	530	0	535	0	0	534.167	0.561833
18.0161	0	535	0	535	0	530	0	535	0	535	0	535	0	535	0	535	0	535	0	535	0	530	0	535	0	0	534.167	0.561833
18.027	0	535	0	535	0	530	0	535	0	535	0	535	0	535	0	535	0	535	0	535	0	530	0	535	0	0	534.167	0.561833
18.0379	0	535	0	535	0	530	0	535	0	535	0	535	0	535	0	535	0	535	0	535	0	530	0	535	0	0	534.167	0.561833
18.0488	0	535	0	535	0	530	0	535	0	535	0	535	0	535	0	535	0	535	0	535	0	530	0	535	0	0	534.167	0.561833
18.0597	0	535	0	535	0	530	0	535	0	535	0	535	0	535	0	535	0	535	0	535	0	530	0	535	0	0	534.167	0.561833
18.0706	0	535	0	535	0	530	0	535	0	535	0	535	0	535	0	535	0	535	0	535	0	530	0	535	0	0	534.167	0.561833
18.0815	0	535	0	535	0	530	0	535	0	535	0	535	0	535	0	535	0	535	0	535	0	530	0	535	0	0	534.167	0.561833
18.0924	0	535	0	535	0	530	0	535	0	535	0	535	0	535	0	535	0	535	0	535	0	530	0	535	0	0	534.167	0.561833
18.1033	0	535	0	535	0	530	0	535	0	535	0	535	0	535	0	535	0	535	0	535	0	530	0	535	0	0	534.167	0.561833
18.1142	0	535	0	535	0	530	0	535	0	535	0	535	0	535	0	535	0	535	0	535	0	530	0	535	0	0	534.167	0.561833
18.1251	0	535	0	535	0	530	0	535	0	535	0	535	0	535	0	535	0	535	0	535	0	530	0	535	0	0	534.167	0.561833
18.1359	0	535	0	535	0	530	0	535	0	535	0	535	0	535	0	535	0	535	0	535	0	530	0	535	0	0	534.167	0.561833
18.1468	0	535	0	535	0	530	0	535	0	535	0	535	0	535	0	535	0	535	0	535	0	530	0	535	0	0	534.167	0.561833
18.1577	0	535	0	535	0	530	0	535	0	535	0	535	0	535	0	535	0	535	0	535	0	530	0	535	0	0	534.167	0.561833
18.1686	0	535	0	535	0	530	0	535	0	535	0	535	0	535	0	535	0	535	0	535	0	530	0	535	0	0	534.167	0.561833
18.1795	0	535	0	535	0	530	0	535	0	535	0	535	0	535	0	535	0	535	0	535	0	530	0	535	0	0	534.167	0.561833
18.1904	0	535	0	535	0	530	0	535	0	535	0	535	0	535	0	535	0	535	0	535	0	530	0	535	0	0	534.167	0.561833
18.2013	0	535	0	535	0	530	0	535	0	535	0	535	0	535	0	535	0	535	0	535	0	530	0	535	0	0	534.167	0.561833
18.2122	0	535	0	535	0	530	0	535	0	535	0	535	0	535	0	535	0	535	0	535	0	530	0	535	0	0	534.167	0.561833
18.2231	0	535	0	535	0	530	0	535	0	535	0	535	0	535	0	535	0	535	0	535	0	530	0	535	0	0	534.167	0.561833
18.234	0	535	0	535	0	530	0	535	0	535	0	535	0	535	0	535	0	535	0	535	0	530	0	535	0	0	534.167	0.561833
18.2449	0	535	0	535	0	530	0	535	0	535	0	535	0	535	0	535	0	535	0	535	0	530	0	535	0	0	534.167	0.561833
18.2558	0	535	0	535	0	530	0	535	0	535	0	535	0	535	0	535	0	535	0	535	0	530	0	535	0	0	534.167	0.561833
18.2667	0	535	0	535	0	530	0	535	0	535	0	535	0	535	0	535	0	535	0	535	0	530	0	535	0	0	534.167	0.561833
18.2775	0	535	0	535	0	530	0	535	0	535	0	535	0	535	0	535	0	535	0	535	0	530	0	535	0	0	534.167	0.561833
18.2884	0	535	0	535	0	530	0	535	0	535	0	535	0	535	0	535	0	535	0	535	0	530	0	535	0	0	534.167	0.561833
18.2993	0	535	0	535	0	530	0	535	0	535	0	535	0	535	0	535	0	535	0	535	0	530	0	535	0	0	534.167	0.561833
18.3102	0	535	0	535	0	530	0	535	0	535	0	535	0	535	0	535	0	535	0	535	0	530	0	535	0	0	534.167	0.561833
18.3211	0	535	0	535	0	530	0	535	0	535	0	535	0	535	0	535	0	535	0	535	0	530	0	535	0	0	534.167	0.561833
18.332	0	535	0	535	0	530	0	535	0	535	0	535	0	535	0	535	0	535	0	535	0	530	0	535	0	0	534.167	0.561833
18.3429	0	535	0	535	0	530	0	535	0	535	0	535	0	535	0	535	0	535	0	535	0	530	0	535	0	0	534.167	0.561833
18.3538	0	535	0	535	0	530	0	535	0	535	0	535	0	535	0	535	0	535	0	535	0	530	0	535	0	0	534.167	0.561833
18.3647	0	535	0	535	0	530	0	535	0	535	0	535	0	535	0	535	0	535	0	535	0	530	0	535	0	0	534.167	0.561833
18.3756	0	535	0	535	0	530	0	535	0	535	0	535	0	535	0	535	0	535	0	535	0	530	0	535	0	0	534.167	0.561833
18.3865	0	535	0	535	0	530	0	535	0	535	0	535	0	535	0	535	0	535	0	535	0	530	0	535	0	0	534.167	0.561833
18.3974	0	535	0	535	0	530	0	535	0	535	0	535	0	535	0	535	0	535	0	535	0	530	0	535	0	0	534.167	0.561833
18.4083	0	535	0	535	0	530	0	535	0	535	0	535	0	535	0	535	0	535	0	535	0	530	0	535	0	0	534.167	0.561833
18.4192	0	535	0	535	0	530	0	535	0	535	0	535	0	535	0	535	0	535	0	535	0	530	0	535	0	0	534.167	0.561833
18.43	0	535	0	535	0	530	0	535	0	535	0	535	0	535	0	535	0	535	0	535	0	530	0	535	0	0	534.167	0.561833
18.4409	0	535	0	535	0	530	0	535	0	535	0	535	0	535	0	535	0	535	0	535	0	530	0	535	0	0	534.167	0.561833
18.4518	0	535	0	535	0	530	0	535	0	535	0	535	0	535	0	535	0	535	0	535	0	530	0	535	0	0	534.167	0.561833
18.4627	0	535	0	535	0	530	0	535	0	535	0	535	0	535	0	535	0	535	0	535	0	530	0	535	0	0	534.167	0.561833
18.4736	0	535	0	535	0	530	0	535	0	535	0	535	0	535	0	535	0	535	0	535	0	530	0	535	0	0	534.167	0.561833
18.4845	0	535	0	535	0	530	0	535	0	535	0	535	0	535	0	535	0	535	0	535	0	530	0	535	0	0	534.167	0.561833
18.4954	0	535	0	535	0	530	0	535	0	535	0	535	0	535	0	535	0	535	0	535	0	530	0	535	0	0	534.167	0.561833
18.5063	0	535	0	535	0	530	0	535	0	535	0	535	0	535	0	535	0	535	0	535	0	530	0	535	0	0	534.167	0.561833
18.5172	0	535	0	535	0	530	0	535	0	535	0	535	0	535	0	535	0	535	0	535	0	530	0	535	0	0	534.167	0.561833
18.5281	0	535	0	535	0	530	0	535	0	535	0	535	0	535	0	535	0	535	0	535	0	530	0	535	0	0	534.167	0.561833
18.539	0	535	0	535	0	530	0	535	0	535	0	535	0	535	0	535	0	535	0	535	0	530	0	535	0	0	534.167	0.561833
18.5499	0	535	0	535	0	530	0	535	0	535	0	535	0	535	0	535	0	535	0	535	0	530	0	535	0	0	534.167	0.561833
18.5608	0	535	0	535	0	530	0	535	0	535	0	535	0	535	0	535	0	535	0	535	0	530	0	535	0	0	534.167	0.561833
18.5716	0	535	0	535	0	530	0	535	0	535	0	535	0	535	0	535	0	535	0	535	0	530	0	535	0	0	534.167	0.561833
18.5825	0	535	0	535	0	530	0	535	0	535	0	535	0	535	0	535	0	535	0	535	0	530	0	535	0	0	534.167	0.561833
18.5934	0	535	0	535	0	530	0	535	0	535	0	535	0	535	0	535	0	535	0	535	0	530	0	535	0	0	534.167	0.561833
18.6043	0	535	0	535	0	530	0	535	0	535	0	535	0	535	0	535	0	535	0	535	0	530	0	535	0	0	534.167	0.561833
18.6152	0	535	0	535	0	530	0	535	0	535	0	535	0	535	0	535	0	535	0	535	0	530	0	535	0	0	534.167	0.561833
18.6261	0	535	0	535	0	530	0	535	0	535	0	535	0	535	0	535	0	535	0	535	0	530	0	535	0	0	534.167	0.561833
18.637	0	535	0	535	0	530	0	535	0	535	0	535	0	535	0	535	0	535	0	535	0	530	0	535	0	0	534.167	0.561833
18.6479	0	535	0	535	0	530	0	535	0	535	0	535	0	535	0	535	0	535	0	535	0	530	0	535	0	0	534.167	0.561833
18.6588	0	535	0	535	0	530	0	535	0	535	0	535	0	535	0	535	0	535	0	535	0	530	0	535	0	0	534.167	0.561833
18.6697	0	535	0	535	0	530	0	535	0	535	0	535	0	535	0	535	0	535	0	535	0	530	0	535	0	0	534.167	0.561833
18.6806	0	535	0	535	0	530	0	535	0	535	0	535	0	535	0	535	0	535	0	535	0	530	0	535	0	0	534.167	0.561833
18.6915	0	535	0	535	0	530	0	535	0	535	0	535	0	535	0	535	0	535	0	535	0	530	0	535	0	0	534.167	0.561833
18.7024	0	535	0	535	0	530	0	535	0	535	0	535	0	535	0	535	0	535	0	535	0	530	0	535	0	0	534.167	0.561833
18.7132	0	535	0	535	0	530	0	535	0	535	0	535	0	535	0	535	0	535	0	535	0	530	0	535	0	0	534.167	0.561833
18.7241	0	535	0	535	0	530	0	535	0	535	0	535	0	535	0	535	0	535	0	535	0	530	0	535	0	0	534.167	0.561833
18.735	0	535	0	535	0	530	0	535	0	535	0	535	0	535	0	535	0	535	0	535	0	530	0	535	0	0	534.167	0.561833
18.7459	0	535	0	535	0	530	0	535	0	535	0	535	0	535	0	535	0	535	0	535	0	530	0	535	0	0	534.167	0.561833
18.7568	0	535	0	535	0	530	0	535	0	535	0	535	0	535	0	535	0	535	0	535	0	530	0	535	0	0	534.167	0.561833
18.7677	0	535	0	535	0	530	0	535	0	535	0	535	0	535	0	535	0	535	0	535	0	530	0	535	0	0	534.167	0.561833
18.7786	0	535	0	535	0	530	0	535	0	535	0	535	0	535	0	535	0	535	0	535	0	530	0	535	0	0	534.167	0.561833
18.7895	0	535	0	535	0	530	0	535	0	535	0	535	0	535	0	535	0	535	0	535	0	530	0	535	0	0	534.167	0.561833
18.8004	0	535	0	535	0	530	0	535	0	535	0	535	0	535	0	535	0	535	0	535	0	530	0	535	0	0	534.167	0.561833
18.8113	0	535	0	535	0	530	0	535	0	535	0	535	0	535	0	535	0	535	0	535	0	530	0	535	0	0	534.167	0.561833
18.8222	0	535	0	535	0	530	0	535	0	535	0	535	0	535	0	535	0	535	0	535	0	530	0	535	0	0	534.167	0.561833
18.8331	0	535	0	535	0	530	0	535	0	535	0	535	0	535	0	535	0	535	0	535	0	530	0	535	0	0	534.167	0.561833
18.844	0	535	0	535	0	530	0	535	0	535	0	535	0	535	0	535	0	535	0	535	0	530	0	535	0	0	534.167	0.561833
18.8548	0	535	0	535	0	530	0	535	0	535	0	535	0	535	0	535	0	535	0	535	0	530	0	535	0	0	534.167	0.561833
18.8657	0	535	0	535	0	530	0	535	0	535	0	535	0	535	0	535	0	535	0	535	0	530	0	535	0	0	534.167	0.561833
18.8766	0	535	0	535	0	530	0	535	0	535	0	535	0	535	0	535	0	535	0	535	0	530	0	535	0	0	534.167	0.561833
18.8875	0	535	0	535	0	530	0	535	0	535	0	535	0	535	0	535	0	535	0	535	0	530	0	535	0	0	534.167	0.561833
18.8984	0	535	0	535	0	530	0	535	0	535	0	535	0	535	0	535	0	535	0	535	0	530	0	535	0	0	534.167	0.561833
18.9093	0	535	0	535	0	530	0	535	0	535	0	535	0	535	0	535	0	535	0	535	0	530	0	535	0	0	534.167	0.561833
18.9202	0	535	0	535	0	530	0	535	0	535	0	535	0	535	0	535	0	535	0	535	0	530	0	535	0	0	534.167	0.561833
18.9311	0	535	0	535	0	530	0	535	0	535	0	535	0	535	0	535	0	535	0	535	0	530	0	535	0	0	534.167	0.561833
18.942	0	535	0	535	0	530	0	535	0	535	0	535	0	535	0	535	0	535	0	535	0	530	0	535	0	0	534.167	0.561833
18.9529	0	535	0	535	0	530	0	535	0	535	0	535	0	535	0	535	0	535	0	535	0	530	0	535	0	0	534.167	0.561833
18.9638	0	535	0	535	0	530	0	535	0	535	0	535	0	535	0	535	0	535	0	535	0	530	0	535	0	0	534.167	0.561833
18.9747	0	535	0	535	0	530	0	535	0	535	0	535	0	535	0	535	0	535	0	535	0	530	0	535	0	0	534.167	0.561833
18.9856	0	535	0	535	0	530	0	535	0	535	0	535	0	535	0	535	0	535	0	535	0	530	0	535	0	0	534.167	0.561833
18.9965	0	535	0	535	0	530	0	535	0	535	0	535	0	535	0	535	0	535	0	535	0	530	0	535	0	0	534.167	0.561833
19.0073	0	535	0	535	0	530	0	535	0	535	0	535	0	535	0	535	0	535	0	535	0	530	0	535	0	0	534.167	0.561833
19.0182	0	535	0	535	0	530	0	535	0	535	0	535	0	535	0	535	0	535	0	535	0	530	0	535	0	0	534.167	0.561833
19.0291	0	535	0	535	0	530	0	535	0	535	0	535	0	535	0	535	0	535	0	535	0	530	0	535	0	0	534.167	0.561833
19.04	0	535	0	535	0	530	0	535	0	535	0	535	0	535	0	535	0	535	0	535	0	530	0	535	0	0	534.167	0.561833
19.0509	0	535	0	535	0	530	0	535	0	535	0	535	0	535	0	535	0	535	0	535	0	530	0	535	0	0	534.167	0.561833
19.0618	0	535	0	535	0	530	0	535	0	535	0	535	0	535	0	535	0	535	0	535	0	530	0	535	0	0	534.167	0.561833
19.0727	0	535	0	535	0	530	0	535	0	535	0	535	0	535	0	535	0	535	0	535	0	530	0	535	0	0	534.167	0.561833
19.0836	0	535	0	535	0	530	0	535	0	535	0	535	0	535	0	535	0	535	0	535	0	530	0	535	0	0	534.167	0.561833
19.0945	0	535	0	535	0	530	0	535	0	535	0	535	0	535	0	535	0	535	0	535	0	530	0	535	0	0	534.167	0.561833
19.1054	0	535	0	535	0	530	0	535	0	535	0	535	0	535	0	535	0	535	0	535	0	530	0	535	0	0	534.167	0.561833
19.1163	0	535	0	535	0	530	0	535	0	535	0	535	0	535	0	535	0	535	0	535	0	530	0	535	0	0	534.167	0.561833
19.1272	0	535	0	535	0	530	0	535	0	535	0	535	0	535	0	535	0	535	0	535	0	530	0	535	0	0	534.167	0.561833
19.1381	0	535	0	535	0	530	0	535	0	535	0	535	0	535	0	535	0	535	0	535	0	530	0	535	0	0	534.167	0.561833
19.1489	0	535	0	535	0	530	0	535	0	535	0	535	0	535	0	535	0	535	0	535	0	530	0	535	0	0	534.167	0.561833
19.1598	0	535	0	535	0	530	0	535	0	535	0	535	0	535	0	535	0	535	0	535	0	530	0	535	0	0	534.167	0.561833
19.1707	0	535	0	535	0	530	0	535	0	535	0	535	0	535	0	535	0	535	0	535	0	530	0	535	0	0	534.167	0.561833
19.1816	0	535	0	535	0	530	0	535	0	535	0	535	0	535	0	535	0	535	0	535	0	530	0	535	0	0	534.167	0.561833
19.1925	0	535	0	535	0	530	0	535	0	535	0	535	0	535	0	535	0	535	0	535	0	530	0	535	0	0	534.167	0.561833
19.2034	0	535	0	535	0	530	0	535	0	535	0	535	0	535	0	535	0	535	0	535	0	530	0	535	0	0	534.167	0.561833
19.2143	0	535	0	535	0	530	0	535	0	535	0	535	0	535	0	535	0	535	0	535	0	530	0	535	0	0	534.167	0.561833
19.2252	0	535	0	535	0	530	0	535	0	535	0	535	0	535	0	535	0	535	0	535	0	530	0	535	0	0	534.167	0.561833
19.2361	0	535	0	535	0	530	0	535	0	535	0	535	0	535	0	535	0	535	0	535	0	530	0	535	0	0	534.167	0.561833
19.247	0	535	0	535	0	530	0	535	0	535	0	535	0	535	0	535	0	535	0	535	0	530	0	535	0	0	534.167	0.561833
19.2579	0	535	0	535	0	530	0	535	0	535	0	535	0	535	0	535	0	535	0	535	0	530	0	535	0	0	534.167	0.561833
19.2688	0	535	0	535	0	530	0	535	0	535	0	535	0	535	0	535	0	535	0	535	0	530	0	535	0	0	534.167	0.561833
19.2797	0	535	0	535	0	530	0	535	0	535	0	535	0	535	0	535	0	535	0	535	0	530	0	535	0	0	534.167	0.561833
19.2905	0	535	0	535	0	530	0	535	0	535	0	535	0	535	0	535	0	535	0	535	0	530	0	535	0	0	534.167	0.561833
19.3014	0	535	0	535	0	530	0	535	0	535	0	535	0	535	0	535	0	535	0	535	0	530	0	535	0	0	534.167	0.561833
19.3123	0	535	0	535	0	530	0	535	0	535	0	535	0	535	0	535	0	535	0	535	0	530	0	535	0	0	534.167	0.561833
19.3232	0	535	0	535	0	530	0	535	0	535	0	535	0	535	0	535	0	535	0	535	0	530	0	535	0	0	534.167	0.561833
19.3341	0	535	0	535	0	530	0	535	0	535	0	535	0	535	0	535	0	535	0	535	0	530	0	535	0	0	534.167	0.561833
19.345	0	535	0	535	0	530	0	535	0	535	0	535	0	535	0	535	0	535	0	535	0	530	0	535	0	0	534.167	0.561833
19.3559	0	535	0	535	0	530	0	535	0	535	0	535	0	535	0	535	0	535	0	535	0	530	0	535	0	0	534.167	0.561833
19.3668	0	535	0	535	0	530	0	535	0	535	0	535	0	535	0	535	0	535	0	535	0	530	0	535	0	0	534.167	0.561833
19.3777	0	535	0	535	0	530	0	535	0	535	0	535	0	535	0	535	0	535	0	535	0	530	0	535	0	0	534.167	0.561833
19.3886	0	535	0	535	0	530	0	535	0	535	0	535	0	535	0	535	0	535	0	535	0	530	0	535	0	0	534.167	0.561833
19.3995	0	535	0	535	0	530	0	535	0	535	0	535	0	535	0	535	0	535	0	535	0	530	0	535	0	0	534.167	0.561833
19.4104	0	535	0	535	0	530	0	535	0	535	0	535	0	535	0	535	0	535	0	535	0	530	0	535	0	0	534.167	0.561833
19.4213	0	535	0	535	0	530	0	535	0	535	0	535	0	535	0	535	0	535	0	535	0	530	0	535	0	0	534.167	0.561833
19.4321	0	535	0	535	0	530	0	535	0	535	0	535	0	535	0	535	0	535	0	535	0	530	0	535	0	0	534.167	0.561833
19.443	0	535	0	535	0	530	0	535	0	535	0	535	0	535	0	535	0	535	0	535	0	530	0	535	0	0	534.167	0.561833
19.4539	0	535	0	535	0	530	0	535	0	535	0	535	0	535	0	535	0	535	0	535	0	530	0	535	0	0	534.167	0.561833
19.4648	0	535	0	535	0	530	0	535	0	535	0	535	0	535	0	535	0	535	0	535	0	530	0	535	0	0	534.167	0.561833
19.4757	0	535	0	535	0	530	0	535	0	535	0	535	0	535	0	535	0	535	0	535	0	530	0	535	0	0	534.167	0.561833
19.4866	0	535	0	535	0	530	0	535	0	535	0	535	0	535	0	535	0	535	0	535	0	530	0	535	0	0	534.167	0.561833
19.4975	0	535	0	535	0	530	0	535	0	535	0	535	0	535	0	535	0	535	0	535	0	530	0	535	0	0	534.167	0.561833
19.5084	0	535	0	535	0	530	0	535	0	535	0	535	0	535	0	535	0	535	0	535	0	530	0	535	0	0	534.167	0.561833
19.5193	0	535	0	535	0	530	0	535	0	535	0	535	0	535	0	535	0	535	0	535	0	530	0	535	0	0	534.167	0.561833
19.5302	0	535	0	535	0	530	0	535	0	535	0	535	0	535	0	535	0	535	0	535	0	530	0	535	0	0	534.167	0.561833
19.5411	0	535	0	535	0	530	0	535	0	535	0	535	0	535	0	535	0	535	0	535	0	530	0	535	0	0	534.167	0.561833
19.552	0	535	0	535	0	530	0	535	0	535	0	535	0	535	0	535	0	535	0	535	0	530	0	535	0	0	534.167	0.561833
19.5629	0	535	0	535	0	530	0	535	0	535	0	535	0	535	0	535	0	535	0	535	0	530	0	535	0	0	534.167	0.561833
19.5738	0	535	0	535	0	530	0	535	0	535	0	535	0	535	0	535	0	535	0	535	0	530	0	535	0	0	534.167	0.561833
19.5846	0	535	0	535	0	530	0	535	0	535	0	535	0	535	0	535	0	535	0	535	0	530	0	535	0	0	534.167	0.561833
19.5955	0	535	0	535	0	530	0	535	0	535	0	535	0	535	0	535	0	535	0	535	0	530	0	535	0	0	534.167	0.561833
19.6064	0	535	0	535	0	530	0	535	0	535	0	535	0	535	0	535	0	535	0	535	0	530	0	535	0	0	534.167	0.561833
19.6173	0	535	0	535	0	530	0	535	0	535	0	535	0	535	0	535	0	535	0	535	0	530	0	535	0	0	534.167	0.561833
19.6282	0	535	0	535	0	530	0	535	0	535	0	535	0	535	0	535	0	535	0	535	0	530	0	535	0	0	534.167	0.561833
19.6391	0	535	0	535	0	530	0	535	0	535	0	535	0	535	0	535	0	535	0	535	0	530	0	535	0	0	534.167	0.561833
19.65	0	535	0	535	0	530	0	535	0	535	0	535	0	535	0	535	0	535	0	535	0	530	0	535	0	0	534.167	0.561833
19.6609	0	535	0	535	0	530	0	535	0	535	0	535	0	535	0	535	0	535	0	535	0	530	0	535	0	0	534.167	0.561833
19.6718	0	535	0	535	0	530	0	535	0	535	0	535	0	535	0	535	0	535	0	535	0	530	0	535	0	0	534.167	0.561833
19.6827	0	535	0	535	0	530	0	535	0	535	0	535	0	535	0	535	0	535	0	535	0	530	0	535	0	0	534.167	0.561833
19.6936	0	535	0	535	0	530	0	535	0	535	0	535	0	535	0	535	0	535	0	535	0	530	0	535	0	0	534.167	0.561833
19.7045	0	535	0	535	0	530	0	535	0	535	0	535	0	535	0	535	0	535	0	535	0	530	0	535	0	0	534.167	0.561833
19.7154	0	535	0	535	0	530	0	535	0	535	0	535	0	535	0	535	0	535	0	535	0	530	0	535	0	0	534.167	0.561833
19.7262	0	535	0	535	0	530	0	535	0	535	0	535	0	535	0	535	0	535	0	535	0	530	0	535	0	0	534.167	0.561833
19.7371	0	535	0	535	0	530	0	535	0	535	0	535	0	535	0	535	0	535	0	535	0	530	0	535	0	0	534.167	0.561833
19.748	0	535	0	535	0	530	0	535	0	535	0	535	0	535	0	535	0	535	0	535	0	530	0	535	0	0	534.167	0.561833
19.7589	0	535	0	535	0	530	0	535	0	535	0	535	0	535	0	535	0	535	0	535	0	530	0	535	0	0	534.167	0.561833
19.7698	0	535	0	535	0	530	0	535	0	535	0	535	0	535	0	535	0	535	0	535	0	530	0	535	0	0	534.167	0.561833
19.7807	0	535	0	535	0	530	0	535	0	535	0	535	0	535	0	535	0	535	0	535	0	530	0	535	0	0	534.167	0.561833
19.7916	0	535	0	535	0	530	0	535	0	535	0	535	0	535	0	535	0	535	0	535	0	530	0	535	0	0	534.167	0.561833
19.8025	0	535	0	535	0	530	0	535	0	535	0	535	0	535	0	535	0	535	0	535	0	530	0	535	0	0	534.167	0.561833
19.8134	0	535	0	535	0	530	0	535	0	535	0	535	0	535	0	535	0	535	0	535	0	530	0	535	0	0	534.167	0.561833
19.8243	0	535	0	535	0	530	0	535	0	535	0	535	0	535	0	535	0	535	0	535	0	530	0	535	0	0	534.167	0.561833
19.8352	0	535	0	535	0	530	0	535	0	535	0	535	0	535	0	535	0	535	0	535	0	530	0	535	0	0	534.167	0.561833
19.8461	0	535	0	535	0	530	0	535	0	535	0	535	0	535	0	535	0	535	0	535	0	530	0	535	0	0	534.167	0.561833
19.857	0	535	0	535	0	530	0	535	0	535	0	535	0	535	0	535	0	535	0	535	0	530	0	535	0	0	534.167	0.561833
19.8678	0	535	0	535	0	530	0	535	0	535	0	535	0	535	0	535	0	535	0	535	0	530	0	535	0	0	534.167	0.561833
19.8787	0	535	0	535	0	530	0	535	0	535	0	535	0	535	0	535	0	535	0	535	0	530	0	535	0	0	534.167	0.561833
19.8896	0	535	0	535	0	530	0	535	0	535	0	535	0	535	0	535	0	535	0	535	0	530	0	535	0	0	534.167	0.561833
19.9005	0	535	0	535	0	530	0	535	0	535	0	535	0	535	0	535	0	535	0	535	0	530	0	535	0	0	534.167	0.561833
19.9114	0	535	0	535	0	530	0	535	0	535	0	535	0	535	0	535	0	535	0	535	0	530	0	535	0	0	534.167	0.561833
19.9223	0	535	0	535	0	530	0	535	0	535	0	535	0	535	0	535	0	535	0	535	0	530	0	535	0	0	534.167	0.561833
19.9332	0	535	0	535	0	530	0	535	0	535	0	535	0	535	0	535	0	535	0	535	0	530	0	535	0	0	534.167	0.561833
19.9441	0	535	0	535	0	530	0	535	0	535	0	535	0	535	0	535	0	535	0	535	0	530	0	535	0	0	534.167	0.561833
19.955	-1.05	535	-0.54	535	-0.31	530	-0.45	535	0.4	535	-0.48	535	-0.11	535	-0.31	535	0.52	535	-1.8	535	-0.57	530	-1.26	535	-0.496667	0.187771	534.167	0.561833
19.9659	-1.09	535	-0.7	535	-0.9	530	-1.51	535	-0.33	535	-0.28	535	0.38	535	-0.11	535	-0.23	535	-1.36	535	-0.46	530	-0.33	535	-0.576667	0.159176	534.167	0.561833
19.9768	-0.79	536	-1.22	535	-0.14	530	-1.33	535	0.54	535	-0.22	535	-0.08	535	-0.58	535	-1.61	535	-1.03	536	-0.46	530	-0.2	535	-0.593333	0.179728	534.333	0.594588
19.9877	-0.78	536	-0.71	535	-0.54	530	0.14	536	-1.09	535	-1.15	535	0.11	535	0	535	-0.67	535	0.08	537	0.01	530	0.12	535	-0.373333	0.144171	534.5	0.633652
19.9986	-0.68	536	-0.04	535	-0.16	530	-1.51	536	-0.86	535	0.07	535	0.12	535	-1.22	535	-1.1	535	-1.34	537	-0.9	530	-0.63	535	-0.6875	0.16417	534.5	0.633652
20.0094	-0.68	536	-0.75	535	-0.49	530	-1.46	536	-0.7	535	-0.26	535	-0.1	535	-0.57	535	-1.49	535	-0.63	537	-0.92	530	-1.34	535	-0.7825	0.129112	534.5	0.633652
20.0203	-0.69	536	-0.84	535	-0.65	530	-0.31	537	-0.24	535	0.12	535	-0.18	535	-1.22	535	-1.04	536	-1.28	537	-1.16	530	-1.28	535	-0.730833	0.140013	534.667	0.666667
20.0312	-1.09	536	-0.2	535	-0.97	530	-1.37	537	-0.79	535	-1.11	535	0.08	535	0.21	535	0.88	537	-0.77	537	-1.04	530	-1.45	536	-0.635	0.207169	534.833	0.694495
20.0421	-0.16	536	-0.83	535	-0.45	530	-0.79	537	-0.12	535	-0.63	535	-0.28	535	0.21	535	-1.22	537	-1.62	537	-0.2	531	-1.56	537	-0.6375	0.169322	535	0.662868
20.053	-0.18	536	-0.95	535	-0.55	530	-1.2	537	-1.18	535	-1.08	535	-0.05	535	-0.64	535	0.61	537	0.86	537	-0.54	531	-1.09	538	-0.499167	0.199425	535.083	0.690392
20.0639	-0.66	536	-0.37	535	-0.53	530	-0.25	537	-0.58	535	0.04	535	0.28	535	0.26	535	-1.39	537	0.95	537	-0.58	531	-1.29	539	-0.343333	0.191099	535.167	0.726483
20.0748	-0.21	536	-0.47	535	0.35	530	0.11	537	-0.49	535	-0.71	535	0.03	535	-0.59	535	0.22	537	-0.22	537	-0.59	531	-1.41	540	-0.331667	0.140501	535.25	0.769937
20.0857	-1.01	536	-0.68	535	-0.09	530	-1.05	537	-0.26	535	0.52	535	-0.03	535	-0.36	535	-1.24	537	-1.78	537	0.11	531	-0.9	541	-0.564167	0.190101	535.333	0.819584
20.0966	-0.72	536	-0.4	535	-0.42	530	-1.22	537	-0.52	535	-0.56	535	-0.16	535	0.39	535	-0.48	537	0.02	537	-0.73	531	1.33	541	-0.289167	0.187368	535.333	0.819584
20.1075	-0.47	536	-0.59	535	-0.11	530	-1.62	538	-0.32	535	-1.41	535	-0.22	535	-0.63	535	-0.48	537	0.33	537	-1.31	531	-0.96	541	-0.649167	0.166544	535.417	0.838996
20.1184	-0.58	536	-0.57	535	-0.28	530	-1.41	539	0.05	535	-0.89	535	-0.54	535	0.09	535	-0.09	537	-1.82	537	-1.1	531	-1.32	541	-0.705	0.176899	535.5	0.866025
20.1293	-0.89	536	-0.52	535	-1.21	530	-1.3	540	-0.32	535	-0.19	535	0.08	535	0.2	535	-1.09	537	-0.84	537	0.33	532	-0.37	541	-0.51	0.160958	535.667	0.864566
20.1402	-0.75	536	-0.75	535	-0.42	530	-0.9	541	-0.38	535	-0.99	535	0.09	535	-1.02	535	-1.03	537	-1.22	537	-1	532	-1.71	541	-0.84	0.131731	535.75	0.90558
20.1511	-0.27	536	-0.49	535	-0.48	530	0.14	541	-0.47	535	-0.57	535	0.01	535	-1.15	535	0.96	538	-0.92	537	-1.08	532	-0.95	541	-0.439167	0.173071	535.833	0.919761
20.1619	-0.44	536	-1.03	535	0.22	530	0.16	541	-0.51	535	-0.45	535	-0.01	535	1.06	536	-0.42	538	0.13	537	-0.38	533	-0.94	541	-0.2175	0.164419	536	0.887625
20.1728	-0.83	536	-0.56	535	-0.31	530	-0.95	541	-0.54	535	-0.33	535	-0.03	535	0.42	537	-0.04	538	-0.42	537	-0.22	533	-0.72	541	-0.3775	0.110564	536.083	0.891529
20.1837	-0.51	536	-0.63	535	-0.37	530	-0.99	541	0.35	535	-0.01	535	0.23	535	-0.03	537	-0.44	538	-0.29	537	-0.28	533	-0.55	541	-0.293333	0.109284	536.083	0.891529
20.1946	-0.76	536	-0.99	535	-0.17	530	-1.99	541	-0.42	535	0	535	0.15	535	-0.3	537	-0.52	538	-0.78	537	-0.69	533	-1.8	541	-0.689167	0.189319	536.083	0.891529
20.2055	-0.53	536	-0.88	535	-0.38	530	-0.64	541	0.14	535	-0.56	535	-0.03	535	-0.32	537	-1.08	538	0.13	537	-0.18	533	-0.12	541	-0.370833	0.110977	536.083	0.891529
20.2164	-0.95	536	-0.64	535	-0.98	530	-0.27	541	-0.46	535	-0.81	535	0.15	535	-1.02	537	-1.2	538	-0.62	537	-0.54	533	0.28	541	-0.588333	0.132481	536.083	0.891529
20.2273	-0.61	536	-0.96	535	-0.16	530	-0.98	541	-0.54	535	-0.22	535	-0.09	535	-1.03	537	-0.22	539	-0.66	537	-0.63	533	-0.22	541	-0.526667	0.0988367	536.167	0.911487
20.2382	-0.83	536	-0.51	535	-1.04	530	-0.49	541	-0.3	535	-0.34	535	0.14	535	-0.38	538	-0.25	539	-1.09	537	-0.33	533	-1.46	541	-0.573333	0.128714	536.25	0.92216
20.2491	-0.97	536	-1.39	535	-0.91	530	-0.53	541	-0.91	535	-0.05	535	0.07	535	0.32	538	-0.01	539	-1.7	537	-1.09	533	-0.09	541	-0.605	0.186959	536.25	0.92216
20.26	-0.93	536	-0.53	535	-0.05	530	-1.19	541	-0.39	535	-0.83	535	0.11	535	-0.61	538	-1.26	539	-1.67	538	-1.24	533	0.29	541	-0.691667	0.175097	536.333	0.932034
20.2709	-0.68	536	-1.16	535	0.62	530	-2.1	541	-0.07	535	-0.19	535	-0.1	535	0.02	538	-0.84	539	-0.22	539	0.2	534	-1.04	541	-0.463333	0.212369	536.5	0.925235
20.2818	-0.97	536	-0.7	535	-0.14	530	-0.99	543	-0.76	535	-0.44	535	-0.02	535	-0.48	538	-0.07	539	0.21	539	-1	534	-1.45	541	-0.5675	0.143533	536.667	1.01005
20.2927	-0.86	536	-0.51	535	-0.5	530	-1.32	543	-0.88	535	-0.36	535	-0.17	535	-1.09	538	-0.13	539	-0.91	539	-1.35	534	-1	542	-0.756667	0.120292	536.75	1.04537
20.3035	-0.75	536	-0.84	535	-1.73	530	-0.8	543	-0.43	535	-0.64	535	0.06	535	-0.01	538	-0.19	539	-0.84	539	-0.64	535	-1.04	542	-0.654167	0.140262	536.833	1.02863
20.3144	-0.79	536	-0.66	535	-0.2	530	-0.42	543	0.34	535	-0.53	535	0.01	535	-0.06	538	-1.86	539	-1.37	539	-0.07	535	-1.31	542	-0.576667	0.189562	536.833	1.02863
20.3253	-0.4	536	-0.71	535	-0.09	530	-1.09	543	-0.38	535	-0.01	535	0.19	535	-0.47	538	0.38	539	-0.5	539	-0.82	535	-2.05	543	-0.495833	0.186289	536.917	1.06926
20.3362	-0.79	536	-0.57	535	0.22	530	-0.39	543	-0.89	535	0.07	535	0.37	535	-0.44	538	-1.49	539	-0.81	539	-1.01	535	-0.84	545	-0.5475	0.157678	537.083	1.16423
20.3471	-1.4	536	-0.48	535	-0.39	530	-1.59	543	-0.66	535	-0.8	535	0.01	535	-0.63	538	0.41	539	-0.89	539	-1.64	535	-0.49	545	-0.7125	0.177124	537.083	1.16423
20.358	-0.86	536	-0.84	535	-1.2	530	-0.93	543	-0.02	535	-0.02	535	-0.23	535	-0.14	538	-0.39	539	-0.26	539	-0.94	536	0	545	-0.485833	0.12596	537.167	1.15361
20.3689	-0.86	536	-0.51	535	-0.62	530	-0.67	543	-0.05	535	0.22	535	0.02	535	-0.57	538	-1	539	-0.79	539	-0.61	536	0.11	545	-0.444167	0.118389	537.167	1.15361
20.3798	-0.67	536	-0.97	535	-0.6	530	-1.04	543	-0.84	535	0.09	535	0	535	-1.03	538	-0.34	539	-0.56	539	-0.41	536	-0.36	545	-0.560833	0.108659	537.167	1.15361
20.3907	-0.53	536	-0.56	535	-0.1	530	-1.46	543	-0.17	535	-0.55	535	0.19	535	-0.14	538	-1.31	539	-1.14	539	-1.15	536	-1.32	545	-0.686667	0.163894	537.167	1.15361
20.4016	-0.76	536	-0.21	535	-1	530	-0.7	544	-0.19	535	-0.38	535	-0.75	535	0.46	538	0.57	539	-0.21	539	-0.95	536	-0.69	545	-0.400833	0.147861	537.25	1.19421
20.4125	-0.95	536	-0.95	535	0.43	530	-1	544	-1.14	535	-0.88	535	-0.17	535	-0.58	538	-0.41	539	-1.44	539	0.06	536	-0.46	545	-0.624167	0.155969	537.25	1.19421
20.4234	-0.66	536	-0.4	535	-0.47	530	-2.12	544	-0.12	535	0.17	535	-0.04	535	-0.55	538	1.07	539	-0.47	539	-0.04	536	0.02	545	-0.300833	0.212134	537.25	1.19421
20.4343	-0.72	536	-0.37	535	-0.92	530	-0.48	544	-0.97	535	-0.26	535	0.24	535	-0.8	538	0.18	539	-0.05	539	-1.43	536	-0.02	545	-0.466667	0.148351	537.25	1.19421
20.4451	-0.93	536	-0.38	535	-0.1	530	0	544	-0.77	535	-0.53	535	0.02	535	-0.7	538	-0.55	539	-1.89	539	-0.91	536	-0.64	545	-0.615	0.149674	537.25	1.19421
20.456	-0.73	536	-1.16	535	0.3	530	-0.44	544	0.08	535	-0.58	535	0.06	535	-0.84	538	-0.86	539	-0.18	539	-0.46	536	-1.1	545	-0.4925	0.137539	537.25	1.19421
20.4669	-0.76	536	-0.65	535	-0.29	530	-0.78	544	-0.03	535	-0.27	535	-0.18	535	-0.21	538	0.26	539	-1.58	539	-0.65	536	-0.71	545	-0.4875	0.137114	537.25	1.19421
20.4778	-0.96	536	-0.7	535	-0.76	530	-0.82	544	0.39	535	-0.56	535	-0.13	535	0.87	538	-0.76	539	-0.5	539	-0.74	536	0.31	545	-0.363333	0.169408	537.25	1.19421
20.4887	-1.13	536	-0.38	535	0.19	530	-1.06	544	-0.01	535	-0.34	535	0.05	535	-1.31	538	-1.01	539	0.01	539	-0.86	536	0.29	545	-0.463333	0.167039	537.25	1.19421
20.4996	-0.63	536	-0.49	535	-1.43	530	-0.12	544	-0.48	535	-1.13	535	-0.25	535	0.51	538	-0.91	539	-0.64	539	-1.05	536	0.21	545	-0.534167	0.16252	537.25	1.19421
20.5105	-0.6	536	-0.41	535	-1.35	530	0.26	544	-1	535	0.17	535	-0.27	535	-0.04	538	0.51	539	-1.77	539	-0.83	536	-1.41	545	-0.561667	0.209725	537.25	1.19421
20.5214	-0.6	536	-0.81	535	-0.36	531	-1.04	544	-0.19	535	-0.63	535	0.28	535	-1.04	538	-0.7	539	-0.48	539	-0.48	536	-0.88	545	-0.5775	0.108132	537.333	1.15032
20.5323	-0.82	536	-0.9	535	-0.47	531	-0.39	544	-0.58	535	-0.96	535	0.22	535	-0.42	538	-1.06	539	0	539	-0.5	536	-1.78	545	-0.638333	0.150518	537.333	1.15032
20.5432	-0.73	536	-0.77	535	-0.04	531	-0.07	544	0	535	-0.25	535	-0.06	535	-0.46	538	-0.79	539	-1.13	539	-1.45	536	-0.06	545	-0.484167	0.140456	537.333	1.15032
20.5541	-0.78	536	-0.38	535	-0.04	531	-0.46	544	0.86	535	-0.7	535	0.23	535	0.02	538	-0.83	539	-0.69	539	-0.65	536	-0.02	545	-0.286667	0.146956	537.333	1.15032
20.565	-1.1	536	-0.69	535	-0.27	531	-0.19	544	-1.05	535	-0.62	535	-0.18	535	-0.6	538	-0.37	539	0.55	539	-1.1	536	-0.91	545	-0.544167	0.140305	537.333	1.15032
20.5759	-0.51	536	-1.03	535	-0.8	531	-1.71	544	-0.07	535	-0.41	535	0	535	-0.42	538	-0.77	539	-1.24	539	-1.15	536	-1.05	545	-0.763333	0.145588	537.333	1.15032
20.5868	-0.69	536	-1.03	535	-0.72	531	0.06	544	-0.11	535	-0.74	535	0.03	535	0.1	538	-1.11	539	-0.29	539	-0.75	537	-0.81	545	-0.505	0.126254	537.417	1.14454
20.5976	-0.86	536	-1.06	536	-0.04	531	-1.01	544	-0.65	535	-0.63	535	0.16	535	-0.1	538	0.12	539	-0.68	539	-0.85	537	-0.75	545	-0.529167	0.127371	537.5	1.1315
20.6085	-0.62	536	-0.88	537	-0.43	531	-0.84	544	0.11	535	0.33	535	-0.02	535	0.56	538	-0.25	539	-1.67	539	-0.42	537	-0.01	545	-0.345	0.175894	537.583	1.12451
20.6194	-0.8	536	-0.48	537	-0.45	531	-0.92	544	-0.31	535	-0.6	535	0.13	535	-0.37	538	0.32	539	-0.58	539	-0.13	537	-1.06	545	-0.4375	0.117151	537.583	1.12451
20.6303	-0.96	536	-0.99	537	-0.48	531	-1.36	544	-0.07	535	-0.48	535	0.2	535	-0.11	538	-0.58	539	0.38	539	-0.05	537	-0.87	545	-0.4475	0.153401	537.583	1.12451
20.6412	-0.55	536	-0.75	537	-0.38	531	-1.96	544	-0.76	535	-0.96	535	0.33	535	-0.55	538	-0.15	539	-0.03	539	-0.87	537	-0.58	545	-0.600833	0.163908	537.583	1.12451
20.6521	-0.75	536	-0.93	537	-0.35	531	-1.28	545	-0.05	535	-0.07	535	0.04	535	-1.37	538	-0.31	539	0.72	539	-0.38	537	0.31	545	-0.368333	0.180512	537.667	1.16991
20.663	-0.66	536	-1.02	537	-0.47	531	-1.1	546	0.04	535	0.27	535	0.19	535	0.99	538	-1.06	539	0.05	539	-0.14	537	-0.5	545	-0.284167	0.183077	537.75	1.21932
20.6739	-0.73	536	-0.74	537	0.28	531	-0.84	547	-0.69	535	-0.5	535	0.01	535	0.13	538	-1.97	539	-1.37	539	-0.75	537	-1.83	545	-0.75	0.204621	537.833	1.27228
20.6848	-0.98	536	-1.02	537	0.01	531	-0.6	547	0	535	-0.89	535	0.18	535	-1.33	538	-0.88	540	-0.59	539	-0.33	537	-0.53	545	-0.58	0.135675	537.917	1.28192
20.6957	-0.24	536	-0.66	537	-0.6	531	-1.08	547	-0.38	535	-0.3	535	0.48	535	-0.61	538	0.7	540	-0.52	539	-1.32	537	-0.23	545	-0.396667	0.163394	537.917	1.28192
20.7066	-0.9	536	-0.95	537	-0.03	531	-0.09	547	-0.51	535	-1.12	535	0.49	535	-0.97	538	-0.46	540	-0.48	539	-0.98	537	-1.15	545	-0.595833	0.147753	537.917	1.28192
20.7175	-0.9	536	-0.75	537	-1.07	531	-0.95	547	-0.26	535	-0.8	535	0.01	535	-0.7	538	-0.22	540	-0.09	539	-0.74	537	-1.34	545	-0.650833	0.121053	537.917	1.28192
20.7284	-0.71	536	-0.8	537	-0.78	531	-1.6	547	0.14	535	-0.49	535	0.32	535	-1.76	538	-0.41	540	-1.3	539	-0.78	537	-0.54	546	-0.725833	0.178553	538	1.32574
20.7392	-0.89	536	-0.77	537	-0.56	531	-0.08	547	0.55	535	-0.58	535	0.52	535	-0.74	538	-0.06	540	-1.23	539	-1.67	537	-0.32	546	-0.485833	0.189443	538	1.32574
20.7501	-0.93	536	-0.64	537	-0.54	531	0.1	547	-0.97	535	-0.66	535	0.28	535	0.15	538	-0.8	540	-0.74	540	-0.88	537	-1.82	546	-0.620833	0.167483	538.083	1.33404
20.761	-0.99	536	-0.37	537	-0.68	531	-0.42	547	-0.75	535	0.14	535	0.06	535	-1.57	538	-0.72	540	-1.58	540	-0.88	537	-0.28	546	-0.67	0.157807	538.083	1.33404
20.7719	-0.96	536	-0.6	537	-0.47	531	-0.62	547	-0.27	535	-0.59	535	0.22	535	-1.24	538	-0.5	540	-0.29	540	-0.87	537	-0.07	546	-0.521667	0.114289	538.083	1.33404
20.7828	-0.96	536	-0.65	537	-0.96	531	-0.27	547	-0.37	535	-0.68	535	-0.03	535	0.29	539	0.07	540	-0.88	540	-1.01	537	-0.89	546	-0.528333	0.130986	538.167	1.33617
20.7937	-1.21	536	-0.82	537	-0.46	531	-0.72	547	-1.06	535	-1.14	535	-0.03	535	-0.72	539	-0.2	540	-0.81	540	-0.98	537	-1.12	546	-0.7725	0.108671	538.167	1.33617
20.8046	-0.8	536	-0.63	537	-0.48	531	-0.55	547	-1.31	535	-0.33	535	-0.01	535	0	539	-1.37	540	0.68	540	-1.54	537	1.22	546	-0.426667	0.236926	538.167	1.33617
20.8155	-0.7	536	-0.73	537	-0.45	531	-0.72	547	-0.43	536	0.82	535	0.05	535	-1.43	539	-0.29	540	0.84	540	-0.59	537	-1.28	547	-0.409167	0.202554	538.333	1.367
20.8264	-0.8	536	-0.65	537	-0.73	531	0.06	547	-1.06	536	0.26	535	0.45	535	0.09	539	-0.43	540	-0.67	540	-1.32	537	-0.51	546	-0.4425	0.157812	538.25	1.32073
20.8373	-0.52	536	-0.44	537	-0.74	531	-1.52	547	-0.24	536	-0.22	535	-0.12	535	-0.23	539	-0.8	540	0.22	540	-1.15	537	-0.12	546	-0.49	0.141405	538.25	1.32073
20.8482	-0.79	536	-0.92	537	-0.26	531	-1.07	547	-0.46	536	-0.02	535	0.24	535	0.27	539	-2.06	540	-0.03	540	-0.93	538	-0.11	546	-0.511667	0.194729	538.333	1.31618
20.8591	-0.82	536	-0.3	537	-0.57	531	-0.68	548	-0.32	536	-0.05	535	-0.05	535	0.16	539	-0.94	540	1.03	540	-0.84	538	-0.57	546	-0.329167	0.159485	538.417	1.36769
20.87	-0.95	536	-0.25	537	0.03	531	-0.53	548	-0.68	536	-1.15	535	0.06	535	-0.24	539	-1.66	540	-0.45	540	-1.26	538	-0.33	546	-0.6175	0.155013	538.417	1.36769
20.8808	-1.04	536	-0.63	537	-0.51	531	0.72	548	-0.43	536	-0.74	535	-0.02	535	-0.96	539	0.21	540	0.27	540	-0.82	538	-0.18	546	-0.344167	0.158399	538.417	1.36769
20.8917	-0.37	536	-0.74	537	-0.63	531	-1.83	548	-0.15	536	-0.36	535	0.37	535	-0.43	539	-0.49	540	-0.43	540	-0.93	538	0.25	546	-0.478333	0.16309	538.417	1.36769
20.9026	-0.57	536	-0.52	537	-1.04	531	-0.34	548	-0.47	536	-0.67	535	0.05	535	-0.53	539	-0.71	540	-1.15	540	-0.99	538	1.27	546	-0.4725	0.184354	538.417	1.36769
20.9135	-0.43	536	-0.4	537	-0.27	531	-0.58	548	0.42	536	0.1	535	0.13	535	0.27	539	-0.64	540	-0.6	540	-1.32	538	0.13	546	-0.265833	0.143318	538.417	1.36769
20.9244	-0.62	536	-0.6	537	-0.17	531	0.08	548	0.48	536	0.09	535	0.53	535	-0.34	539	-1.21	540	0.07	540	-1.32	538	0.09	546	-0.243333	0.172409	538.417	1.36769
20.9353	-0.9	536	-0.5	537	-0.75	531	-0.19	548	-0.9	536	-0.03	535	0.41	535	-0.25	539	-0.03	540	0.04	540	-0.79	539	-0.2	546	-0.340833	0.122248	538.5	1.36792
20.9462	-0.56	536	-1.16	537	0.1	531	-1.11	548	-0.78	536	0	535	0.08	535	-0.71	539	0.35	540	0.02	540	0.06	539	-0.73	546	-0.37	0.151677	538.5	1.36792
20.9571	-0.87	536	-0.59	537	-1.32	531	-1.23	548	-0.48	536	-0.86	535	0.09	535	-0.53	539	-0.71	540	0.19	540	-0.53	539	-1.76	546	-0.716667	0.159893	538.5	1.36792
20.968	-1.06	536	-0.47	537	-0.61	531	-0.21	549	-1.16	536	-0.71	535	0.4	535	-1.34	539	0.71	540	-0.57	540	-2.2	539	-0.14	546	-0.613333	0.225974	538.583	1.422
20.9789	-0.46	536	-0.39	537	-1.51	531	-1.5	549	-0.31	536	-1.78	535	0.07	535	0.11	539	-2.43	540	-0.97	540	-0.67	539	-1.88	546	-0.976667	0.239283	538.583	1.422
20.9898	-0.57	536	-0.51	537	-0.4	531	-0.2	549	-1.09	536	-0.94	535	0.37	535	-1.28	539	-0.29	540	0.74	540	-0.2	539	-1.05	546	-0.451667	0.173165	538.583	1.422
21.0007	-1.02	536	-0.44	537	-0.61	531	-1.36	549	-0.45	536	-1.52	535	0.05	535	-0.15	539	-0.38	540	-1.27	540	-0.88	539	-0.84	547	-0.739167	0.142342	538.667	1.46336
21.0116	-0.49	536	-0.41	537	-0.79	531	-0.53	549	-0.29	536	-0.9	535	0.43	535	-0.01	539	-1.6	540	-0.87	540	-0.86	539	-0.13	547	-0.5375	0.150726	538.667	1.46336
21.0224	-0.69	536	-0.61	537	-0.76	531	-0.76	549	-0.62	536	-0.34	535	0.25	535	-0.5	539	0.73	540	-0.65	540	-0.45	539	-1.18	547	-0.465	0.144901	538.667	1.46336
21.0333	-1.22	536	-0.64	537	-0.01	531	-0.46	549	-0.07	536	-0.27	535	-0.13	535	-0.53	539	-0.79	540	0.07	540	-0.3	539	0.93	547	-0.285	0.153112	538.667	1.46336
21.0442	-0.71	536	-0.69	537	-0.79	531	-0.55	549	0.4	536	-0.09	535	0.19	535	-1.32	539	-1.96	540	-1.07	540	-0.24	539	-0.55	547	-0.615	0.187917	538.667	1.46336
21.0551	-0.72	536	-0.77	537	-0.52	531	-0.74	549	-1.04	536	-0.5	535	0.22	535	-0.14	539	-2.22	540	-0.91	540	-0.18	539	-0.42	547	-0.661667	0.174958	538.667	1.46336
21.066	0.01	536	-1.11	537	-0.92	531	0.57	549	0.13	536	-0.43	535	0.35	535	-1.08	539	0.25	542	-0.55	540	-1.02	539	-0.54	547	-0.361667	0.174546	538.833	1.48647
21.0769	-0.87	536	-0.53	537	-0.29	531	-0.49	549	0.13	536	-1.37	535	-0.11	535	-1.33	539	-0.41	542	-0.25	540	-1.12	539	0.38	547	-0.521667	0.160505	538.833	1.48647
21.0878	-1.03	536	-1.07	537	0.11	531	0	549	-0.22	536	-0.59	535	0.51	535	-0.28	540	-1.22	542	-1.42	540	-0.84	540	0.21	547	-0.486667	0.181852	539	1.49241
21.0987	-0.86	536	-0.78	537	-0.59	531	-0.28	549	-0.71	536	-1.31	535	0.01	535	0.3	540	-0.03	542	-0.38	540	-1.23	540	-0.63	547	-0.540833	0.14115	539	1.49241
21.1096	-0.91	536	-0.58	537	-0.43	531	-0.04	549	-0.6	536	-0.41	535	0.65	535	-0.32	540	1.09	542	-1.36	540	-0.16	540	-0.33	547	-0.283333	0.186938	539	1.49241
21.1205	-0.77	536	-0.92	537	-0.97	531	0.13	549	-0.8	536	-0.67	535	-0.05	535	-0.42	540	-0.58	542	-1.53	540	-0.79	540	-0.7	547	-0.6725	0.123988	539	1.49241
21.1314	-0.67	536	-0.87	537	0.12	531	0.12	549	-0.77	536	-0.88	535	0.31	535	-0.18	540	-1.06	542	-0.09	541	-0.7	540	0.44	547	-0.3525	0.152122	539.083	1.49979
21.1423	-0.98	536	-0.66	537	-0.87	531	-0.89	549	-0.38	536	-1.26	535	0.55	535	0.13	540	-1.63	542	-0.01	541	-0.63	540	-1.69	547	-0.693333	0.19729	539.083	1.49979
21.1532	-0.59	536	-0.81	537	-0.11	531	-1.48	549	-0.83	536	-0.63	535	0.53	535	-0.3	540	-0.59	543	-0.9	541	-0.67	540	0.34	547	-0.503333	0.159209	539.167	1.51674
21.1641	-1.34	536	-0.99	537	-0.79	531	-0.92	549	-0.98	536	-0.8	535	0.12	535	-1.29	540	0.53	543	-1.58	541	0.26	540	-0.88	547	-0.721667	0.192566	539.167	1.51674
21.1749	-0.9	536	-0.55	537	-0.99	531	0.14	549	-0.02	536	-0.28	535	0.31	535	0.09	540	0.08	543	-1.35	541	-0.69	540	-1.8	547	-0.496667	0.192276	539.167	1.51674
21.1858	-0.95	536	-0.62	537	-0.66	531	-1.05	549	-0.72	536	-0.72	535	0.11	535	0.33	540	0.12	543	-0.23	542	0.16	540	0.34	547	-0.324167	0.148994	539.25	1.52815
21.1967	-0.75	536	-0.75	537	-1.01	531	-0.59	549	-1.24	536	-0.03	535	0.36	535	0.36	540	-2.01	543	-2.91	542	-0.2	540	-0.56	547	-0.7775	0.273842	539.25	1.52815
21.2076	-0.6	536	-0.36	537	-0.17	531	-0.17	549	0	536	-0.61	535	0.34	535	-0.27	540	0.21	543	-0.1	542	-1.1	540	-0.86	547	-0.3075	0.122382	539.25	1.52815
21.2185	-0.98	536	-0.81	537	-0.12	531	-1.02	549	-0.37	536	0.2	535	0.34	535	-0.34	540	0.21	543	-0.14	542	-1.27	540	-0.12	547	-0.368333	0.154291	539.25	1.52815
21.2294	-0.18	536	-0.78	537	-0.41	531	0.73	549	-0.4	536	-0.74	535	0.15	535	-0.52	540	0.14	543	-0.92	542	-1.17	541	-0.24	547	-0.361667	0.152384	539.333	1.53412
21.2403	-0.6	536	-0.73	537	-0.64	531	-0.38	549	-0.81	536	-1.03	535	0.29	535	0.51	540	-0.23	543	-0.3	542	-0.21	542	-0.17	547	-0.358333	0.128605	539.417	1.54458
21.2512	-0.98	536	-0.8	537	-1.17	531	-1.5	549	-1.29	536	-0.38	535	0.25	535	-0.12	540	-0.66	543	-0.43	542	-0.36	542	0.42	547	-0.585	0.172427	539.417	1.54458
21.2621	-0.81	536	-0.47	537	-0.25	531	-1.7	549	-0.55	536	-0.01	535	0.24	535	-0.1	540	-1.03	543	-1.03	542	-0.91	542	-0.5	547	-0.593333	0.155092	539.417	1.54458
21.273	-0.63	536	-0.83	537	-0.35	531	-0.92	550	-0.33	536	-1.02	535	0.32	535	-0.34	540	0.02	543	-0.18	542	-0.37	542	0.01	547	-0.385	0.117199	539.5	1.59307
21.2839	-0.74	536	-0.8	537	-0.54	531	-0.17	550	-1.22	536	-1.01	535	0.71	535	-0.33	540	-1.1	543	-1.02	542	-0.37	542	-1.08	547	-0.639167	0.157655	539.5	1.59307
21.2948	-0.93	536	-0.51	537	-0.39	531	-0.96	550	-0.39	536	0.24	536	0.38	535	-1.56	540	-0.72	543	0.89	542	-0.97	542	-0.15	547	-0.4225	0.196912	539.583	1.57373
21.3057	-0.92	536	-0.44	537	-0.47	531	0.53	550	-0.43	536	-0.82	536	0.47	535	-1.54	540	0.02	543	-0.36	542	-0.99	542	-0.89	547	-0.486667	0.175198	539.583	1.57373
21.3165	-0.7	536	-1.1	537	-0.9	531	-1.76	550	-0.44	536	-0.48	536	0.38	535	0.28	541	-0.89	543	-0.23	542	-0.33	542	-0.51	547	-0.556667	0.168547	539.667	1.57794
21.3274	-0.66	536	-1.28	537	-0.13	531	-0.86	550	0.03	536	-0.99	536	0.08	535	0.82	541	1.02	543	-1.17	542	-1.45	542	0.27	547	-0.36	0.23868	539.667	1.57794
21.3383	-0.58	536	-0.88	538	-0.17	531	0.81	550	-0.54	536	-1.24	536	-0.26	535	-0.68	541	-1.87	543	1.05	542	-0.81	542	0.81	547	-0.363333	0.253498	539.75	1.5673
21.3492	-0.8	536	-0.53	538	-0.74	531	0.09	550	-0.6	536	-0.93	536	0.55	535	-0.08	541	-0.13	542	-0.2	543	-0.74	542	-0.08	547	-0.349167	0.12787	539.75	1.5673
21.3601	-1.01	536	-0.78	538	-0.37	531	0.08	550	-0.69	536	-0.29	536	0.17	535	-0.45	541	-0.46	542	0.07	543	-1.6	542	-0.13	547	-0.455	0.147517	539.75	1.5673
21.371	-1.05	536	-0.46	538	-1.33	531	-0.55	550	-1.13	536	-0.34	536	0.29	535	-0.12	541	-1.89	542	0.38	543	-0.07	542	-0.91	547	-0.598333	0.197138	539.75	1.5673
21.3819	-0.96	537	-1.01	538	-0.38	531	-0.67	550	-0.13	536	-0.99	536	0.03	535	-0.31	541	-0.34	542	-0.73	543	-1.37	542	-0.31	547	-0.5975	0.122054	539.833	1.55131
21.3928	-1.06	537	-0.37	538	-0.84	531	-1.09	550	-0.44	536	-1.14	536	0.46	535	-1.22	541	-0.65	542	-0.83	543	-0.68	542	-0.21	547	-0.6725	0.138669	539.833	1.55131
21.4037	-0.93	537	-0.94	538	-0.65	531	-0.54	550	-0.99	536	-0.63	536	0.19	535	0.6	541	-0.58	542	0.25	543	-1.17	542	-0.65	547	-0.503333	0.160158	539.833	1.55131
21.4146	-0.9	537	-0.75	538	-0.2	531	-0.8	550	-0.58	536	-0.36	536	0.1	535	0.08	541	-2.53	542	-0.7	543	-1.16	542	-0.95	547	-0.729167	0.200259	539.833	1.55131
21.4255	-0.55	537	-0.69	538	-1.43	531	-0.28	550	0.31	536	-1.17	536	0.2	535	-0.06	541	-0.45	542	1.06	543	-1.53	543	0.06	547	-0.3775	0.219694	539.917	1.56408
21.4364	-0.77	537	-0.96	538	-0.5	531	-0.87	550	-1.1	536	-0.31	536	0.16	535	-0.71	541	-0.45	542	-1.3	543	-0.35	544	0.56	547	-0.55	0.152151	540	1.58114
21.4473	-0.8	537	-0.55	538	-0.73	531	-1.32	550	-0.2	536	-0.33	536	-0.07	535	-0.23	541	-0.57	542	-1.03	542	-0.72	544	-0.74	547	-0.6075	0.104723	539.917	1.56891
21.4581	-0.68	537	-0.51	538	-0.78	531	-0.71	550	-0.3	536	-0.34	536	0.4	535	-0.58	541	-0.87	542	1.27	543	-0.48	544	-0.76	547	-0.361667	0.177208	540	1.58114
21.469	-0.59	537	-0.36	538	-1.07	531	-0.69	550	-0.53	536	-0.62	536	0.11	535	0.06	541	-1.21	542	0.06	544	-0.75	544	-0.65	547	-0.52	0.122709	540.083	1.59762
21.4799	-0.95	537	-0.77	538	-0.01	531	-1.7	550	-0.99	536	-0.89	536	0.13	535	-0.97	541	-0.5	542	-1.04	544	-0.82	544	0.16	547	-0.695833	0.158948	540.083	1.59762
21.4908	-1.01	537	-0.57	538	-0.73	531	-0.69	550	-0.68	536	-1.04	536	0.36	535	-0.1	541	0.09	542	-0.39	544	-0.5	544	0.68	547	-0.381667	0.154777	540.083	1.59762
21.5017	-0.84	537	-1.05	538	-0.21	531	-0.51	550	-0.02	536	-0.93	536	0.16	535	-1.13	541	0.59	542	-0.57	544	-0.02	544	0.7	547	-0.319167	0.178824	540.083	1.59762
21.5126	-1.24	537	-1.19	538	-0.64	531	0.32	550	-0.36	536	-0.21	536	0.28	535	0.26	541	-1.28	542	-1.79	544	-0.53	544	-1.84	547	-0.685	0.224683	540.083	1.59762
21.5235	-0.83	537	-0.78	539	-0.45	531	-0.52	550	-0.57	536	-0.56	536	0.08	535	-0.4	541	-0.13	542	0.99	544	-0.33	544	-2.05	547	-0.4625	0.200692	540.167	1.5899
21.5344	-0.87	537	-1.22	539	-1.06	531	-0.97	550	-0.31	536	-0.43	536	0.23	535	0.23	541	-0.43	542	2.15	544	-0.49	544	-0.05	549	-0.268333	0.259407	540.333	1.66211
21.5453	-0.9	537	-0.95	539	-0.79	531	-0.95	550	-0.19	536	-0.18	536	0.13	535	0.21	541	-0.18	542	-0.84	544	-1.1	544	-0.46	549	-0.516667	0.132713	540.333	1.66211
21.5562	-1.35	537	-0.5	539	-0.54	531	-0.99	550	-0.99	536	-0.12	536	0.26	535	-0.25	541	-0.59	542	-0.18	544	0	544	-0.43	549	-0.473333	0.133305	540.333	1.66211
21.5671	-0.45	537	-1.28	539	-0.7	531	-0.42	550	-1.07	536	-0.43	536	0.25	535	-0.42	541	-0.73	542	-0.4	544	-0.31	544	-0.37	549	-0.5275	0.112237	540.333	1.66211
21.578	-0.69	537	-0.74	539	-0.43	531	-1.33	550	-0.68	536	-0.12	536	0.62	535	-0.35	541	0.06	542	-1.02	544	-0.87	544	0.04	549	-0.459167	0.156517	540.333	1.66211
21.5889	-1.13	537	-0.73	539	-0.72	531	-0.03	550	-0.99	536	0.33	536	0.42	535	0.06	541	-0.14	542	-1.43	544	-0.97	544	0.38	549	-0.4125	0.188817	540.333	1.66211
21.5997	-1.02	537	-1.12	539	-0.48	531	-1.8	550	-0.48	536	-0.24	536	0.62	535	0.65	541	-0.28	542	-1.32	545	-1.33	544	-1.17	549	-0.664167	0.222338	540.417	1.68081
21.6106	-0.61	538	-1.09	539	-0.47	531	-0.34	550	-0.67	536	-0.69	536	0.36	535	0.42	541	-1.58	542	-0.92	546	-1.35	544	-0.48	549	-0.618333	0.172666	540.583	1.6898
21.6215	-0.67	538	-1.47	540	-0.73	531	-0.36	550	-0.69	536	-1.51	536	0.83	535	-0.49	541	-1.51	542	-0.15	546	-0.57	545	-0.65	549	-0.664167	0.188978	540.75	1.70171
21.6324	-0.99	538	-0.95	541	-0.69	531	-0.79	550	-0.23	536	-0.63	536	0.37	535	-0.71	541	-0.5	543	-1.21	546	-0.81	545	1.41	549	-0.4775	0.207726	540.917	1.70764
21.6433	-0.67	538	-0.61	541	-0.14	531	-0.13	550	-0.97	536	-0.84	536	0.13	535	-0.81	541	0.09	543	-0.49	546	-0.89	545	-1.43	549	-0.563333	0.13635	540.917	1.70764
21.6542	-0.62	538	-0.36	541	-1.37	531	-0.79	550	-0.88	536	-0.39	536	0.27	535	0.18	541	-0.4	543	0.16	546	-1.18	545	-0.8	548	-0.515	0.152805	540.833	1.67347
21.6651	-0.56	538	-0.59	541	-0.56	531	-0.7	550	-0.44	536	-0.73	536	0.46	535	-1.08	541	-1.16	543	-0.28	546	-0.44	545	-0.02	548	-0.508333	0.125739	540.833	1.67347
21.676	-0.48	538	-0.62	541	-0.81	531	-1.08	550	0.11	536	-1.03	536	0.36	535	0.6	541	-0.2	543	-0.65	546	-1.22	545	0.02	548	-0.416667	0.171178	540.833	1.67347
21.6869	-1.08	538	-0.64	541	0.13	531	-0.12	550	-1.39	536	-0.03	536	0.37	535	-1.13	541	-1.13	543	0.04	546	-1.07	545	-1.05	548	-0.591667	0.18005	540.833	1.67347
21.6978	-1.28	538	-1.09	541	-1.43	531	-0.15	550	-0.76	536	-0.06	536	0.16	535	0.92	541	0.78	543	-1.19	546	-1.43	546	-0.91	548	-0.536667	0.242906	540.917	1.69428
21.7087	-0.55	539	-1.13	541	-1.02	531	-1.71	550	-0.69	536	-0.27	536	0.49	535	0.22	541	-0.24	543	-1.46	546	-0.22	547	-0.7	548	-0.606667	0.188544	541.083	1.70764
21.7196	-0.73	539	-1.32	542	0.16	532	1.17	550	-0.74	536	-1.56	536	0.24	535	0.92	541	-0.97	543	-0.97	547	-0.78	547	-0.42	548	-0.416667	0.248301	541.333	1.68924
21.7305	-0.79	539	-0.63	543	-0.88	532	-0.89	551	-0.3	536	-0.84	536	0.04	535	0.15	541	-1.59	543	-0.67	547	-0.62	547	-0.6	548	-0.635	0.131711	541.5	1.73424
21.7414	-0.96	539	-0.25	543	-0.63	532	0.74	551	-0.61	536	-0.24	536	-0.24	535	-0.61	541	-1.31	543	-0.7	547	-0.62	547	-0.7	548	-0.510833	0.143998	541.5	1.73424
21.7522	-1.18	539	-0.34	543	-0.57	532	0.21	551	-0.15	536	0.14	536	0.31	535	-1	541	-0.77	544	0.46	547	-1.34	547	-0.11	548	-0.361667	0.17533	541.583	1.74277
21.7631	-1.14	539	-0.48	543	-0.93	532	-0.83	551	-1.35	536	-0.71	536	0.04	535	-0.41	541	-1.17	544	1.49	547	-0.31	547	0.71	548	-0.424167	0.240112	541.583	1.74277
21.774	-1.08	540	-0.38	543	-0.93	532	-0.73	551	-0.3	536	0.2	536	0.2	535	-0.44	541	-0.04	544	-0.95	547	-1.59	547	-0.54	548	-0.548333	0.155407	541.667	1.73351
[truncated: 521 more rows]

## Sheet: Figure 5D
Time	dF/F0_bleach_correct	Wavelength	dF/F0_bleach_correct	Wavelength	dF/F0_bleach_correct	Wavelength	dF/F0_bleach_correct	Wavelength	dF/F0_bleach_correct	Wavelength	Mean DF/F0	SEM DF/F0	Mean wavelength	SEM wavelength
0.0108	-0.97	530	-0.91	530	-1.93	530	-1.39	530	-1.4	530	-0.2	0.183576	530	0
0.0216	-0.94	530	-0.56	530	-1.54	531	-1.35	531	-1.2	531	0	0.17054	530.6	0.244949
0.0325	-0.66	530	-1.04	530	-1.77	532	-1.68	532	-1.13	532	0.07	0.207572	531.2	0.489898
0.0433	-0.97	530	-1.13	530	-1.32	533	-1.02	533	-1.03	533	0.17	0.0621772	531.8	0.734847
0.0541	-0.65	530	-0.85	531	-1.35	534	-1.45	534	-0.98	534	0.22	0.150785	532.6	0.87178
0.0649	-1.08	530	-1.37	531	-1.73	535	-1.31	535	-1.35	534	-0.15	0.104326	533	1.04881
0.0758	-1.07	530	-0.97	531	-1.57	536	-2.18	536	-1.25	534	-0.05	0.218321	533.4	1.249
0.0866	-1.05	531	-1.72	531	-2.62	537	-1.54	538	-1.01	535	0.19	0.292257	534.4	1.46969
0.0974	-1.15	532	-1.05	531	-2.34	539	-1.49	539	-1.26	536	-0.06	0.232323	535.4	1.69115
0.1082	-1.28	533	-1.09	532	-2.01	541	-1.04	540	-1.37	537	-0.17	0.173822	536.6	1.80555
0.1191	-0.68	534	-2.03	533	-1.97	543	-1.12	541	-1.56	538	-0.36	0.256737	537.8	1.93391
0.1299	-0.64	534	-1.09	535	-1.88	544	-1.17	542	-1.63	539	-0.43	0.216827	538.8	1.93391
0.1407	-0.96	534	-1.22	536	-2.23	545	-1.35	543	-0.79	540	0.41	0.2499	539.6	2.06398
0.1515	-1.28	534	-1.67	537	-1.53	547	-1.42	544	-1.2	540	0	0.0844393	540.4	2.33666
0.1624	-0.84	534	-1.59	538	-1.99	548	-1.3	545	-1.19	540	0.01	0.193685	541	2.48998
0.1732	-0.68	534	-1.36	539	-1.41	549	-1.34	546	-1.49	541	-0.29	0.146308	541.8	2.63439
0.184	-0.79	534	-1.25	540	-2.44	550	-1.23	547	-1.66	542	-0.46	0.277968	542.6	2.78568
0.1948	-1.02	534	-1.54	541	-1.66	552	-1.54	548	-1.29	543	-0.09	0.11463	543.6	3.07571
0.2057	-0.98	534	-1.08	542	-1.65	553	-1.38	549	-1.16	544	0.04	0.11975	544.4	3.23419
0.2165	-0.62	534	-0.91	543	-2.36	554	-1.65	550	-0.95	545	0.25	0.314887	545.2	3.39706
0.2273	-0.85	534	-0.71	543	-2.42	556	-1.65	551	-1.26	545	-0.06	0.308114	545.8	3.73363
0.2381	-0.81	534	-1.2	543	-2.03	558	-1.18	552	-1.1	545	0.1	0.203828	546.4	4.08167
0.249	-0.91	534	-1.22	543	-1.79	560	-1.54	553	-1.41	546	-0.21	0.148479	547.2	4.42041
0.2598	-0.5	534	-1.33	544	-1.78	561	-1.44	554	-0.91	547	0.29	0.221887	548	4.57165
0.2706	-1.28	534	-2.15	545	-1.96	562	-1.23	555	-0.95	547	0.25	0.229883	548.6	4.7392
0.2814	-1.09	534	-1.37	547	-1.89	563	-1.43	556	-1.45	547	-0.25	0.128437	549.4	4.88467
0.2923	-0.57	535	-1.67	548	-1.93	564	-1.37	557	-1.47	547	-0.27	0.228963	550.2	4.91325
0.3031	-0.92	535	-1.41	549	-1.91	565	-1.7	558	-1.33	548	-0.13	0.168956	551	5.06952
0.3139	-1.3	535	-1.75	550	-1.39	566	-1.39	559	-1.09	549	0.11	0.106658	551.8	5.22877
0.3247	-1.25	535	-1.45	551	-1.49	567	-1.63	560	-0.98	550	0.22	0.112783	552.6	5.39073
0.3356	-1.01	536	-0.99	552	-2.48	568	-1.29	561	-1.11	550	0.09	0.281062	553.4	5.41849
0.3464	-1.06	537	-1.63	552	-2.26	570	-1.25	562	-0.98	550	0.22	0.234576	554.2	5.60714
0.3572	-1.12	538	-1.38	552	-1.57	572	-1.19	563	-1.4	550	-0.2	0.0802122	555	5.81378
0.368	-0.28	539	-1.49	553	-1.98	573	-1.53	564	-0.72	550	0.48	0.306447	555.8	5.86003
0.3789	-1.12	539	-1.71	554	-1.68	574	-1.53	565	-1.27	550	-0.07	0.115646	556.4	6.05475
0.3897	-1.15	539	-0.96	555	-1.94	575	-1.1	566	-1.12	550	0.08	0.174574	557	6.253
0.4005	-0.96	540	-0.89	555	-2.34	576	-1.16	567	-0.54	551	0.66	0.307252	557.8	6.27216
0.4113	-0.99	540	-1.13	555	-2.16	578	-1.12	568	-0.85	551	0.35	0.233131	558.4	6.63777
0.4222	-0.57	540	-1.47	555	-2.28	580	-1.57	569	-0.99	551	0.21	0.288298	559	7.00714
0.433	-1.04	540	-1.44	556	-2.17	582	-1.79	570	-0.99	551	0.21	0.224424	559.8	7.35119
0.4438	-0.58	540	-1.42	557	-1.92	584	-1.41	571	-1.26	551	-0.06	0.215555	560.6	7.69805
0.4546	-1.03	540	-1.41	558	-2.15	585	-1.54	572	-1.21	551	-0.01	0.191322	561.2	7.89557
0.4655	-1.01	540	-1.27	559	-1.91	587	-1.41	573	-1.25	552	-0.05	0.149533	562.2	8.18169
0.4763	-1.11	541	-1.34	560	-2.17	588	-1.57	574	-1.01	553	0.19	0.206591	563.2	8.18169
0.4871	-0.83	542	-1.62	561	-2.07	590	-1.63	575	-0.9	554	0.3	0.237129	564.4	8.33427
0.4979	-0.67	542	-1.34	562	-2.44	592	-1.89	576	-1.18	554	0.02	0.304345	565.2	8.68562
0.5088	-0.75	542	-1.63	563	-2.15	594	-1.53	577	-1.28	554	-0.08	0.228701	566	9.03881
0.5196	-0.96	542	-1.84	564	-1.82	596	-1.76	578	-0.85	555	0.35	0.221937	567	9.32738
0.5304	-0.86	542	-1.56	565	-1.79	597	-1.27	579	-1.51	555	-0.31	0.157842	567.6	9.5268
0.5412	-0.44	542	-1.63	566	-1.74	598	-1.85	580	-1.02	555	0.18	0.266132	568.2	9.72831
0.5521	-0.78	542	-1.55	567	-1.92	599	-1.36	581	-1.23	556	-0.03	0.187441	569	9.86408
0.5629	-1.3	542	-0.93	568	-2.14	600	-1.31	582	-0.99	557	0.21	0.215977	569.8	10.002
0.5737	-1.02	542	-1.01	568	-2.34	600	-1.56	583	-1.29	557	-0.09	0.245776	570	10.0648
0.5845	-1.05	543	-1.64	568	-2.22	600	-1.55	584	-0.95	557	0.25	0.22846	570.4	9.993
0.5954	-0.7	544	-1.4	569	-2.75	600	-1.85	585	-1.59	557	-0.39	0.333038	571	9.91464
0.6062	-1.05	544	-1.82	570	-2.51	600	-1.69	586	-1.07	557	0.13	0.270562	571.4	9.97798
0.617	-0.98	544	-1.81	571	-2.07	600	-1.42	587	-1.2	558	0	0.198459	572	9.97497
0.6278	-1.33	544	-1.54	572	-1.63	600	-1.47	588	-1.26	559	-0.06	0.0675722	572.6	9.97798
0.6387	-1.11	544	-1.38	573	-2.32	600	-1.19	589	-1.26	560	-0.06	0.221481	573.2	9.98699
0.6495	-0.96	545	-0.87	574	-1.91	600	-1.19	590	-1.11	561	0.09	0.184185	574	9.85393
0.6603	-0.59	545	-1.98	574	-1.66	600	-1.25	591	-0.81	562	0.39	0.257864	574.4	9.87218
0.6711	-0.81	545	-1.57	574	-2.13	600	-1.23	592	-1.19	562	0.01	0.221576	574.6	9.95791
0.682	-1.24	545	-1.5	575	-2.04	600	-1.17	593	-0.84	562	0.36	0.20036	575	10.0449
0.6928	-1.06	545	-1.32	576	-1.67	600	-1.4	594	-1.13	562	0.07	0.107824	575.4	10.1371
0.7036	-0.93	546	-0.93	577	-2.5	600	-1.67	595	-0.92	562	0.28	0.312618	576	10.0846
0.7144	-0.82	546	-1.48	577	-2.17	600	-1.67	596	-0.93	562	0.27	0.247843	576.2	10.1804
0.7252	-0.94	546	-1.64	577	-2.33	600	-1.79	597	-0.94	562	0.26	0.266071	576.4	10.2791
0.7361	-1.68	546	-1.7	578	-2.2	600	-1.41	598	-1.01	562	0.19	0.195013	576.8	10.3846
0.7469	-0.76	546	-1.28	579	-1.89	600	-1.48	599	-0.74	562	0.46	0.219272	577.2	10.4948
0.7577	-1.05	546	-1.43	580	-2.39	600	-1.14	600	-1.45	562	-0.25	0.237832	577.6	10.6094
0.7685	-0.59	546	-1.65	581	-1.74	600	-1.67	600	-1.17	562	0.03	0.218348	577.8	10.6226
0.7794	-0.97	546	-1.67	582	-2.19	600	-1.67	600	-1.11	563	0.09	0.2196	578.2	10.566
0.7902	-0.75	546	-1.16	583	-2.28	600	-1.8	600	-0.87	564	0.33	0.290816	578.6	10.5148
0.801	-0.87	546	-1.44	584	-2.43	600	-1.26	600	-1.18	564	0.02	0.26504	578.8	10.5376
0.8118	-1.01	546	-1.57	585	-2.49	600	-1.47	600	-1.45	564	-0.25	0.242949	579	10.5641
0.8227	-1.05	546	-2.15	586	-1.62	600	-1.74	600	-1.6	565	-0.4	0.176051	579.4	10.5243
0.8335	-0.68	547	-1.7	588	-2.1	600	-1.55	600	-1.15	566	0.05	0.242582	580.2	10.3653
0.8443	-1.07	547	-1.27	589	-2.17	600	-1.62	600	-1.25	567	-0.05	0.195028	580.6	10.3373
0.8551	-0.67	547	-1.39	590	-2.05	600	-1.3	600	-1.41	568	-0.21	0.218989	581	10.315
0.866	-0.71	547	-1.86	591	-2.78	600	-1.64	600	-0.98	569	0.22	0.363175	581.4	10.2985
0.8768	-0.84	547	-1.31	592	-1.93	600	-1.33	600	-1.35	569	-0.15	0.172986	581.6	10.347
0.8876	-0.82	547	-1.96	593	-1.93	600	-1.68	600	-1.29	569	-0.09	0.215513	581.8	10.399
0.8984	-1.12	547	-1.5	594	-2.7	600	-1.37	600	-1.4	570	-0.2	0.27764	582.2	10.3942
0.9093	-1.26	547	-0.93	595	-2.04	600	-1.68	600	-1.23	571	-0.03	0.194098	582.6	10.3952
0.9201	-0.82	548	-1.05	595	-1.76	600	-1.8	600	-0.99	572	0.21	0.206073	583	10.1686
0.9309	-1.18	548	-1.95	595	-1.66	600	-1.41	600	-1.36	572	-0.16	0.133694	583	10.1686
0.9417	-0.87	548	-1.27	596	-2.3	600	-1.26	600	-1.17	572	0.03	0.242582	583.2	10.2294
0.9526	-0.83	548	-1.74	597	-1.9	600	-1.61	600	-1.1	573	0.1	0.202252	583.6	10.2401
0.9634	-0.99	548	-1.65	598	-2.17	600	-1.84	600	-1.09	574	0.11	0.224018	584	10.2567
0.9742	-1.01	548	-1.76	599	-2.4	600	-1.65	600	-1.33	575	-0.13	0.232873	584.4	10.2791
0.985	-0.88	548	-1.46	600	-2.17	600	-1.43	600	-1.18	576	0.02	0.213696	584.8	10.3073
0.9959	-1.1	548	-1.52	600	-1.54	600	-1.44	600	-1.41	577	-0.21	0.0792717	585	10.2665
1.0067	-1.37	548	-0.77	600	-1.82	600	-1.48	600	-0.85	578	0.35	0.197773	585.2	10.2294
1.0175	-1.18	549	-1.84	600	-2.37	600	-1.62	600	-1.37	578	-0.17	0.206315	585.4	10.0479
1.0283	-0.96	550	-1.53	600	-2.25	600	-1.55	600	-1.12	578	0.08	0.223638	585.6	9.86712
1.0392	-0.9	550	-1.07	600	-1.29	600	-1.46	600	-1.41	579	-0.21	0.105669	585.8	9.83056
1.05	-1.46	550	-0.75	600	-1.73	600	-1.35	600	-1.27	580	-0.07	0.160574	586	9.79796
1.0608	-0.89	550	-1.17	600	-2.18	600	-1.84	600	-1.07	581	0.13	0.246921	586.2	9.76934
1.0716	-1.23	550	-1.57	600	-2.04	600	-1.59	600	-1.52	582	-0.32	0.129885	586.4	9.74474
1.0825	-1.19	550	-0.99	600	-2.09	600	-1.52	600	-1	583	0.2	0.206625	586.6	9.7242
1.0933	-1.19	551	-1.52	600	-1.86	600	-1.56	600	-1.43	583	-0.23	0.108139	586.8	9.53625
1.1041	-1.04	552	-1.09	600	-2.5	600	-1.43	600	-1.35	583	-0.15	0.265092	587	9.3488
1.1149	-0.66	553	-1.19	600	-2	600	-1.32	600	-1.46	584	-0.26	0.216139	587.4	9.14112
1.1258	-1.19	553	-1.68	600	-2.28	600	-1.86	600	-1	585	0.2	0.230703	587.6	9.12469
1.1366	-1.06	553	-1.49	600	-2.13	600	-1.27	600	-1.63	585	-0.43	0.181538	587.6	9.12469
1.1474	-1.11	554	-1.28	600	-1.77	600	-1.79	600	-1.17	585	0.03	0.147905	587.8	8.93532
1.1582	-0.77	555	-1.58	600	-2.43	600	-1.75	600	-1.55	586	-0.35	0.264756	588.2	8.73155
1.1691	-0.92	555	-0.8	600	-2.64	600	-1.54	600	-1.23	587	-0.03	0.32963	588.4	8.72124
1.1799	-0.93	555	-1.28	600	-2.68	600	-1.34	600	-1.2	588	0	0.30662	588.6	8.7155
1.1907	-1.05	555	-1.43	600	-2.4	600	-1.88	600	-1.26	589	-0.06	0.241384	588.8	8.71436
1.2015	-1.01	555	-1.73	600	-2.49	600	-1.91	600	-1.14	590	0.06	0.269177	589	8.7178
1.2124	-1.62	556	-1.66	600	-2.28	600	-1.56	600	-0.88	591	0.32	0.222081	589.4	8.52995
1.2232	-0.88	557	-1.36	600	-2.33	600	-1.9	600	-1.2	591	0	0.258565	589.6	8.33427
1.234	-1.22	557	-0.9	600	-1.81	600	-1.42	600	-1.76	591	-0.56	0.170012	589.6	8.33427
1.2448	-1.22	557	-1.07	600	-1.95	600	-1.68	600	-1.05	592	0.15	0.179516	589.8	8.34506
1.2557	-1.02	558	-1.13	600	-1.87	600	-1.43	600	-1.1	593	0.1	0.156301	590.2	8.16333
1.2665	-1.44	559	-1.32	600	-1.78	600	-1.76	600	-1.46	594	-0.26	0.0922171	590.6	7.98499
1.2773	-0.74	560	-1.4	600	-2	600	-1.54	600	-1.54	595	-0.34	0.203116	591	7.81025
1.2881	-1.45	560	-1.49	600	-2.49	600	-1.39	600	-1.2	596	0	0.227015	591.2	7.83837
1.299	-1.74	560	-1.48	600	-2.38	600	-1.89	600	-1.19	597	0.01	0.200265	591.4	7.87147
1.3098	-1.17	561	-1.87	600	-2.01	600	-1.81	600	-1.09	598	0.11	0.190997	591.8	7.70973
1.3206	-1.05	562	-1.9	600	-1.8	600	-1.63	600	-1.39	599	-0.19	0.152794	592.2	7.55248
1.3314	-1.16	563	-1.79	600	-2.13	600	-1.68	600	-1.28	600	-0.08	0.175937	592.6	7.4
1.3423	-1.02	564	-0.74	600	-2.38	600	-1.78	600	-1.19	600	0.01	0.293809	592.8	7.2
1.3531	-1.21	565	-1.24	600	-1.74	600	-1.77	600	-1.15	600	0.05	0.136799	593	7
1.3639	-1.36	566	-1.76	600	-2.07	600	-1.41	600	-1.39	600	-0.19	0.138615	593.2	6.8
1.3747	-1.29	567	-1.68	600	-2.81	600	-1.47	600	-1.17	600	0.03	0.294374	593.4	6.6
1.3855	-0.97	568	-1.56	600	-2.63	600	-1.61	600	-1.11	600	0.09	0.291266	593.6	6.4
1.3964	-1.08	568	-1.25	600	-2.34	600	-1.43	600	-1.34	600	-0.14	0.220712	593.6	6.4
1.4072	-1.34	568	-1.43	600	-2.75	600	-1.92	600	-1.49	600	-0.29	0.260818	593.6	6.4
1.418	-0.51	569	-1.56	600	-2.59	600	-1.05	600	-1.23	600	-0.03	0.345288	593.8	6.2
1.4288	-0.9	569	-1.08	600	-1.62	600	-1.8	600	-0.83	600	0.37	0.195847	593.8	6.2
1.4397	-1.06	569	-1.87	600	-2.59	600	-1.72	600	-0.9	600	0.3	0.303733	593.8	6.2
1.4505	-1.29	569	-1.82	600	-1.86	600	-1.7	600	-1.16	600	0.04	0.143164	593.8	6.2
1.4613	-1.12	570	-1.32	600	-2.25	600	-1.61	600	-1.17	600	0.03	0.207379	594	6
1.4721	-0.92	571	-1.31	600	-2.36	600	-1.71	600	-1.62	600	-0.42	0.238256	594.2	5.8
1.483	-0.87	571	-2.3	600	-2.56	600	-1.97	600	-1.07	600	0.13	0.334942	594.2	5.8
1.4938	-1.02	571	-2.11	600	-2.33	600	-1.55	600	-1.3	600	-0.1	0.245222	594.2	5.8
1.5046	-1.33	571	-1.83	600	-2.34	600	-1.54	600	-1.08	600	0.12	0.217315	594.2	5.8
1.5154	-0.87	572	-1.76	600	-2.47	600	-1.75	600	-1.52	600	-0.32	0.256605	594.4	5.6
1.5263	-1.1	572	-1.87	600	-2.47	600	-1.54	600	-1.01	600	0.19	0.267533	594.4	5.6
1.5371	-1.28	572	-1.69	600	-2.84	600	-1.41	600	-1.13	600	0.07	0.306643	594.4	5.6
1.5479	-1.13	573	-1.36	600	-2.78	600	-1.58	600	-1.28	600	-0.08	0.297516	594.6	5.4
1.5587	-1.79	574	-1.4	600	-3.3	600	-1.81	600	-1.39	600	-0.19	0.352355	594.8	5.2
1.5696	-1.18	575	-1.32	600	-2.54	600	-1.3	600	-0.94	600	0.26	0.279313	595	5
1.5804	-1.26	576	-1.61	600	-2.29	600	-1.77	600	-1.56	600	-0.36	0.169452	595.2	4.8
1.5912	-1.56	577	-1.76	600	-2.48	600	-1.75	600	-1.09	600	0.11	0.223862	595.4	4.6
1.602	-1.18	578	-1.12	600	-2.71	600	-1.82	600	-1.56	600	-0.36	0.287965	595.6	4.4
1.6129	-1.5	579	-1.53	600	-2.7	600	-1.89	600	-1.03	600	0.17	0.278334	595.8	4.2
1.6237	-1.06	580	-1.3	600	-2.89	600	-1.81	600	-1.32	600	-0.12	0.327057	596	4
1.6345	-1.36	581	-1.96	600	-2.83	600	-1.61	600	-1.31	600	-0.11	0.278866	596.2	3.8
1.6453	-0.94	582	-1.33	600	-2.51	600	-1.91	600	-0.93	600	0.27	0.304362	596.4	3.6
1.6562	-1.48	582	-1.7	600	-2.8	600	-2.01	600	-1.08	600	0.12	0.289303	596.4	3.6
1.667	-1.45	582	-1.89	600	-3	600	-1.79	600	-1.46	600	-0.26	0.284313	596.4	3.6
1.6778	-1.26	583	-1.55	600	-2.82	600	-1.55	600	-1.37	600	-0.17	0.282966	596.6	3.4
1.6886	-1.06	584	-1.07	600	-3.12	600	-1.64	600	-0.92	600	0.28	0.408637	596.8	3.2
1.6995	-0.89	585	-1.24	600	-2.71	600	-1.91	600	-1.3	600	-0.1	0.320266	597	3
1.7103	-1.2	585	-1.92	600	-2.91	600	-1.89	600	-1.04	600	0.16	0.33105	597	3
1.7211	-1.17	585	-1.7	600	-3.21	600	-1.4	600	-1.27	600	-0.07	0.375726	597	3
1.7319	-1.26	586	-1.53	600	-2.72	600	-1.92	600	-1.13	600	0.07	0.285962	597.2	2.8
1.7428	-1.35	587	-1.14	600	-3.09	600	-1.7	600	-0.95	600	0.25	0.381846	597.4	2.6
1.7536	-1.29	588	-1.45	600	-3.1	600	-1.65	600	-1.27	600	-0.07	0.343837	597.6	2.4
1.7644	-0.86	589	-2.22	600	-2.53	600	-1.66	600	-1.32	600	-0.12	0.300772	597.8	2.2
1.7752	-1.39	589	-1.6	600	-3	600	-1.45	600	-1.55	600	-0.35	0.302744	597.8	2.2
1.7861	-1.31	589	-1.81	600	-2.12	600	-2.02	600	-1.4	600	-0.2	0.162462	597.8	2.2
1.7969	-0.81	590	-1.2	600	-3.23	600	-1.72	600	-1.1	600	0.1	0.430388	598	2
1.8077	-0.82	590	-1.28	600	-2.82	600	-1.75	600	-1.2	600	0	0.344842	598	2
1.8185	-1.27	590	-1.5	600	-2.96	600	-1.86	600	-0.71	600	0.49	0.374847	598	2
1.8294	-1.78	590	-1.47	600	-3.16	600	-1.69	600	-1.26	600	-0.06	0.334416	598	2
1.8402	-0.95	591	-1.88	600	-2.65	600	-1.86	600	-1.12	600	0.08	0.304884	598.2	1.8
1.851	-1.54	591	-1.39	600	-2.7	600	-2.09	600	-1.04	600	0.16	0.291194	598.2	1.8
1.8618	-1.29	591	-1.64	600	-3.03	600	-1.92	600	-0.88	600	0.32	0.36386	598.2	1.8
1.8727	-0.92	592	-1.64	600	-2.67	600	-1.7	600	-1.52	600	-0.32	0.281496	598.4	1.6
1.8835	-1.26	592	-1.43	600	-2.77	600	-1.8	600	-0.62	600	0.58	0.354325	598.4	1.6
1.8943	-0.87	592	-1.99	600	-2.79	600	-1.7	600	-0.7	600	0.5	0.382139	598.4	1.6
1.9051	-1.46	592	-1.56	600	-3.08	600	-1.62	600	-1.18	600	0.02	0.333647	598.4	1.6
1.916	-0.99	592	-1.95	600	-2.88	600	-1.9	600	-1.06	600	0.14	0.345899	598.4	1.6
1.9268	-0.97	592	-1.75	600	-2.52	600	-1.69	600	-1.47	600	-0.27	0.250878	598.4	1.6
1.9376	-1.63	592	-1.55	600	-2.9	600	-1.73	600	-0.86	600	0.34	0.329251	598.4	1.6
1.9484	-1.09	592	-1.84	600	-2.75	600	-1.73	600	-1.32	600	-0.12	0.285387	598.4	1.6
1.9593	-0.82	593	-0.97	600	-2.92	600	-1.71	600	-1.29	600	-0.09	0.376768	598.6	1.4
1.9701	-1.58	593	-1.47	600	-3.2	600	-1.95	600	-0.94	600	0.26	0.379175	598.6	1.4
1.9809	-1.82	593	-1.58	600	-3.14	600	-2.24	600	-1.18	600	0.02	0.334521	598.6	1.4
1.9917	-0.92	594	-1.37	600	-3.6	600	-1.92	600	-0.93	600	0.27	0.497849	598.8	1.2
2.0026	-0.8	594	-1.76	600	-3.45	600	-2.12	600	-0.75	600	0.45	0.496292	598.8	1.2
2.0134	-0.82	594	-1.71	600	-3.2	600	-1.92	600	-1.44	600	-0.24	0.391847	598.8	1.2
2.0242	-1.27	594	-1.4	600	-3.06	600	-1.94	600	-1.09	600	0.11	0.356418	598.8	1.2
2.035	-1.41	594	-1.54	600	-3.09	600	-2.04	600	-1.52	600	-0.32	0.312074	598.8	1.2
2.0458	-1.01	595	-1.25	600	-2.71	600	-1.74	600	-1.42	600	-0.22	0.295916	599	1
2.0567	-1.13	596	-1.67	600	-3.78	600	-1.7	600	-1.56	600	-0.36	0.464364	599.2	0.8
2.0675	-1.04	597	-1.92	600	-3.14	600	-1.96	600	-0.9	600	0.3	0.401427	599.4	0.6
2.0783	-1.6	598	-1.25	600	-2.95	600	-2.19	600	-1.17	600	0.03	0.332331	599.6	0.4
2.0891	-1.26	599	-1.93	600	-2.95	600	-1.66	600	-1.18	600	0.02	0.318976	599.8	0.2
2.1	-0.73	600	-1.72	600	-2.41	600	-1.44	600	-0.98	600	0.22	0.294425	600	0
2.1108	-0.94	600	-2.25	600	-3.04	600	-1.74	600	-1.45	600	-0.25	0.358505	600	0
2.1216	-1.02	600	-2	600	-2.92	600	-1.86	600	-1.31	600	-0.11	0.32742	600	0
2.1324	-1.02	600	-1.1	600	-3.28	600	-1.46	600	-1.15	600	0.05	0.42608	600	0
2.1433	-1.09	600	-2	600	-2.54	600	-1.73	600	-1.36	600	-0.16	0.25244	600	0
2.1541	-1.22	600	-1.1	600	-2.75	600	-2.3	600	-1.18	600	0.02	0.340793	600	0
2.1649	-1.13	600	-1.85	600	-2.58	600	-1.93	600	-0.95	600	0.25	0.294659	600	0
2.1757	-0.9	600	-1.22	600	-2.91	600	-1.87	600	-1.14	600	0.06	0.362952	600	0
2.1866	-1.31	600	-1.49	600	-2.98	600	-2.12	600	-1.11	600	0.09	0.339638	600	0
2.1974	-1.15	600	-1.88	600	-2.95	600	-1.69	600	-1.3	600	-0.1	0.317279	600	0
2.2082	-1.01	600	-1.85	600	-2.68	600	-1.95	600	-1.27	600	-0.07	0.290936	600	0
2.219	-1.02	600	-1.06	600	-3.18	600	-2.06	600	-1.65	600	-0.45	0.396883	600	0
2.2299	-1.12	600	-1.79	600	-2.72	600	-1.75	600	-1.16	600	0.04	0.289714	600	0
2.2407	-1.45	600	-1.6	600	-3.14	600	-1.94	600	-1.58	600	-0.38	0.310264	600	0
2.2515	-1.06	600	-2.04	600	-2.66	600	-1.84	600	-1.74	600	-0.54	0.257573	600	0
2.2623	-1.17	600	-1.72	600	-3.12	600	-2.17	600	-1.3	600	-0.1	0.352599	600	0
2.2732	-1.53	600	-1.59	600	-3.09	600	-2.25	600	-1.25	600	-0.05	0.330551	600	0
2.284	-0.71	600	-2.09	600	-2.34	600	-2.18	600	-1.38	600	-0.18	0.3055	600	0
2.2948	-0.84	600	-2.43	600	-3.04	600	-1.89	600	-1.73	600	-0.53	0.367159	600	0
2.3056	-1.11	600	-1.83	600	-2.77	600	-1.43	600	-1.75	600	-0.55	0.278826	600	0
2.3165	-1.38	600	-1.37	600	-3.46	600	-1.8	600	-1.13	600	0.07	0.422012	600	0
2.3273	-0.88	600	-1.79	600	-3.2	600	-1.93	600	-1.8	600	-0.6	0.370904	600	0
2.3381	-0.96	600	-1.86	600	-3.05	600	-2.32	600	-1.12	600	0.08	0.386347	600	0
2.3489	-0.97	600	-1.06	600	-3.14	600	-2.15	600	-1.2	600	0	0.416444	600	0
2.3598	-1.18	600	-1.61	600	-3.05	600	-1.78	600	-1.9	600	-0.7	0.311394	600	0
2.3706	-0.88	600	-1.64	600	-3.05	600	-1.75	600	-1.3	600	-0.1	0.364563	600	0
2.3814	-1.35	600	-2.03	600	-3.55	600	-1.83	600	-1.7	600	-0.5	0.380951	600	0
2.3922	-0.95	600	-1.65	600	-3.31	600	-1.73	600	-1.19	600	0.01	0.412087	600	0
2.4031	-1.36	600	-1.68	600	-2.76	600	-1.75	600	-1.29	600	-0.09	0.263351	600	0
2.4139	-1.2	600	-1.43	600	-3.34	600	-2.21	600	-1.28	600	-0.08	0.404022	600	0
2.4247	-1	600	-2.25	600	-3.54	600	-2.2	600	-1.11	600	0.09	0.461747	600	0
2.4355	-1.32	600	-1.68	600	-3.02	600	-2.04	600	-1.77	600	-0.57	0.287569	600	0
2.4464	-0.6	600	-2.07	600	-3.03	600	-1.89	600	-1.46	600	-0.26	0.3968	600	0
2.4572	-1.72	600	-1.28	600	-3.2	600	-2.16	600	-1.3	600	-0.1	0.355618	600	0
2.468	-1.45	600	-1.99	600	-3.26	600	-2.09	600	-0.83	600	0.37	0.402388	600	0
2.4788	-1.2	600	-1.95	600	-2.67	600	-2.09	600	-1.68	600	-0.48	0.24169	600	0
2.4897	-1.43	600	-1.72	600	-2.99	600	-2.46	600	-1.5	600	-0.3	0.303562	600	0
2.5005	-1.26	597	-1.82	597	-2.65	598	-2	598	-1.21	597	-0.01	0.264753	597.4	0.244949
2.5113	-1.11	594	-1.72	594	-3.13	596	-2.15	596	-1.15	594	0.05	0.37302	594.8	0.489898
2.5221	-1.61	591	-1.42	591	-3.26	595	-1.88	594	-1.64	591	-0.44	0.332632	592.4	0.87178
2.533	-1.43	588	-1.57	588	-2.91	594	-2.45	591	-1.58	588	-0.38	0.292923	589.8	1.2
2.5438	-0.88	585	-1.41	585	-2.75	592	-2.4	589	-1.74	585	-0.54	0.336015	587.2	1.42829
2.5546	-1.35	581	-1.82	582	-3.12	590	-2.2	587	-1.42	582	-0.22	0.322806	584.4	1.74929
2.5654	-1.79	578	-1.6	579	-2.74	589	-2.22	585	-1.02	579	0.18	0.289924	582	2.14476
2.5763	-0.74	575	-1.78	576	-3.11	587	-2.38	583	-1.41	576	-0.21	0.405791	579.4	2.37908
2.5871	-1.11	571	-1.8	573	-3.64	586	-2.08	581	-1.82	573	-0.62	0.419524	576.8	2.87054
2.5979	-1.53	568	-2	570	-2.87	585	-2.24	579	-1.55	570	-0.35	0.24806	574.4	3.26497
2.6087	-1.03	565	-2.08	567	-3.11	583	-1.96	577	-1.11	567	0.09	0.378964	571.8	3.49857
2.6196	-1.52	562	-1.87	565	-3.09	582	-2.02	574	-1.36	564	-0.16	0.303437	569.4	3.76298
2.6304	-1	559	-1.18	562	-3.23	581	-1.65	572	-1.09	561	0.11	0.415415	567	4.15933
2.6412	-1.08	556	-2.44	559	-3.11	580	-2.35	569	-1.29	558	-0.09	0.379745	564.4	4.50111
2.652	-1.67	553	-1.99	557	-3.2	579	-1.92	567	-1.66	555	-0.46	0.285682	562.2	4.84149
2.6629	-0.95	550	-1.55	554	-3.57	578	-2.18	564	-1.3	552	-0.1	0.461075	559.6	5.1923
2.6737	-0.93	546	-1.55	551	-3.32	577	-2.32	562	-1.52	549	-0.32	0.412109	557	5.68331
2.6845	-1.21	542	-1.97	548	-3.02	576	-2.33	560	-1.5	546	-0.3	0.318129	554.4	6.17738
2.6953	-1.93	539	-1.18	545	-2.86	575	-2.22	558	-1.14	543	0.06	0.325201	552	6.57267
2.7062	-0.83	536	-1.69	542	-3.16	573	-2.48	556	-1.28	540	-0.08	0.418132	549.4	6.79412
2.717	-1.8	532	-1.97	539	-2.86	572	-2.23	554	-1.72	537	-0.52	0.20549	546.8	7.28972
2.7278	-1.38	529	-1.88	536	-2.67	570	-1.81	552	-1.52	534	-0.32	0.224129	544.2	7.51266
2.7386	-1.42	526	-1.45	533	-2.97	568	-2.2	549	-1.5	531	-0.3	0.302281	541.4	7.68505
2.7494	-1.2	523	-1.59	530	-3.16	566	-2.31	547	-1.29	528	-0.09	0.368334	538.8	7.90822
2.7603	-1.58	520	-1.61	527	-2.69	565	-2.01	545	-1.52	525	-0.32	0.219713	536.4	8.30422
2.7711	-1.13	517	-1.86	524	-3.17	563	-2.08	543	-1.54	522	-0.34	0.343054	533.8	8.52877
2.7819	-1.5	514	-2.24	521	-3.35	562	-2.16	541	-1.74	519	-0.54	0.318377	531.4	8.92525
2.7927	-1.63	511	-2.12	519	-3.29	561	-2.39	539	-1.75	516	-0.55	0.295932	529.2	9.26499
2.8036	-1.24	508	-1.42	517	-3.27	560	-1.98	537	-1.16	513	0.04	0.391147	527	9.60729
2.8144	-1.2	505	-1.71	514	-2.81	559	-1.81	534	-1.64	510	-0.44	0.265341	524.4	9.95289
2.8252	-1.74	502	-1.98	511	-2.52	557	-2.23	531	-1.74	507	-0.54	0.150013	521.6	10.1272
2.836	-1.42	499	-2.39	508	-3.19	555	-2.21	529	-1.65	504	-0.45	0.310103	519	10.3489
2.8469	-0.85	496	-1.6	506	-3.04	554	-1.92	527	-1.4	501	-0.2	0.363819	516.8	10.693
2.8577	-1.17	492	-2.09	503	-3.2	553	-1.93	524	-1.34	498	-0.14	0.357975	514	11.14
2.8685	-1.46	489	-1.68	501	-3.12	552	-1.99	521	-1.51	495	-0.31	0.306356	511.6	11.4438
2.8793	-1.17	486	-1.82	498	-3.25	551	-2.05	518	-1.27	492	-0.07	0.372859	509	11.7983
2.8902	-1.02	483	-1.71	495	-3.47	550	-1.95	516	-1.72	489	-0.52	0.405149	506.6	12.1926
2.901	-1.42	480	-1.97	492	-3.1	549	-1.9	513	-1.92	486	-0.72	0.277892	504	12.5499
2.9118	-1.52	477	-1.89	489	-3.11	548	-2.08	510	-1.31	483	-0.11	0.312688	501.4	12.9097
2.9226	-1.38	474	-1.99	486	-3.05	547	-1.98	508	-1.56	480	-0.36	0.289886	499	13.3041
2.9335	-0.98	471	-1.92	483	-2.91	546	-2.13	505	-1.59	477	-0.39	0.317468	496.4	13.666
2.9443	-1.31	467	-2.6	480	-3.53	544	-1.91	503	-1.69	474	-0.49	0.391464	493.6	13.9735
2.9551	-1.74	464	-1.76	478	-3.2	543	-1.67	500	-1.72	471	-0.52	0.295878	491.2	14.2878
2.9659	-1.79	461	-2.27	475	-3.18	542	-2.37	497	-1.43	468	-0.23	0.296216	488.6	14.6513
2.9768	-1.45	458	-1.89	473	-3.29	541	-2.09	495	-1.36	465	-0.16	0.346058	486.4	14.9987
2.9876	-1.12	455	-1.72	470	-2.55	540	-1.78	493	-1.44	462	-0.24	0.23779	484	15.3916
2.9984	-1.16	452	-2.29	467	-3.29	538	-2.1	490	-1.38	459	-0.18	0.376731	481.2	15.5737
3.0092	-1.17	449	-2.58	465	-3.14	537	-1.95	488	-1.32	456	-0.12	0.373141	479	15.9217
3.0201	-1.55	446	-1.82	463	-3.42	536	-2.03	485	-1.85	453	-0.65	0.330524	476.6	16.2438
3.0309	-1.48	443	-1.71	460	-2.95	535	-1.96	483	-1.77	450	-0.57	0.255746	474.2	16.6355
3.0417	-1.49	440	-1.98	457	-3.24	533	-1.89	480	-1.53	447	-0.33	0.318412	471.4	16.8184
3.0525	-1.58	437	-1.72	454	-2.49	532	-2.35	477	-1.41	444	-0.21	0.215058	468.8	17.1855
3.0634	-1.45	434	-2.09	451	-3.37	530	-2.47	475	-1.43	441	-0.23	0.360699	466.2	17.3937
3.0742	-1.12	431	-1.48	449	-3.68	529	-2.53	473	-1.75	438	-0.55	0.455405	464	17.7426
3.085	-1.29	428	-2.36	446	-3.83	528	-2.31	471	-1.72	435	-0.52	0.430179	461.6	18.1345
3.0958	-1.11	425	-2.13	444	-2.95	527	-2.1	469	-1.47	432	-0.27	0.315506	459.4	18.484
3.1067	-1.68	422	-1.98	442	-3.54	525	-2.03	467	-0.95	429	0.25	0.422571	457	18.6521
3.1175	-1.5	419	-1.88	439	-3.71	524	-2.25	465	-1.91	425	-0.71	0.383836	454.4	19.1196
3.1283	-1.59	416	-1.48	436	-3.74	523	-2.22	463	-1.6	422	-0.4	0.423976	452	19.5115
3.1391	-1.12	413	-1.36	433	-2.67	522	-2.38	461	-1.55	419	-0.35	0.300875	449.6	19.9038
3.15	-1.32	410	-2.25	430	-3.52	520	-1.97	459	-1.04	416	0.16	0.433347	447	20.1147
3.1608	-1.3	407	-2.83	428	-3.32	519	-2.62	456	-1.25	413	-0.05	0.419507	444.6	20.4367
3.1716	-1.18	404	-2.27	426	-2.96	518	-2.21	454	-1.56	410	-0.36	0.308068	442.4	20.7885
3.1824	-1.35	401	-1.92	424	-3.16	516	-1.85	452	-1.31	407	-0.11	0.334625	440	20.9595
3.1933	-1.62	400	-2.34	421	-3.34	515	-2.22	449	-1.26	404	-0.06	0.355663	437.8	21.141
3.2041	-1.34	400	-1.99	419	-3.44	514	-2.23	447	-1.54	401	-0.34	0.368475	436.2	21.2306
3.2149	-1.74	400	-1.83	416	-3.54	513	-2.33	445	-1.68	400	-0.48	0.348462	434.8	21.2071
3.2257	-1.89	400	-1.93	413	-3.53	512	-1.81	443	-1.22	400	-0.02	0.385585	433.6	21.1154
3.2366	-1.03	400	-1.84	410	-2.98	511	-2.7	440	-0.93	400	0.27	0.418791	432.2	21.02
3.2474	-1.4	400	-1.5	407	-2.84	509	-1.9	438	-1.42	400	-0.22	0.272514	430.8	20.7735
3.2582	-1.49	400	-1.82	404	-3.28	507	-2.18	435	-1.17	400	0.03	0.364107	429.2	20.5266
3.269	-1.68	400	-1.56	401	-3.57	506	-2.35	433	-1.37	400	-0.17	0.401505	428	20.5012
3.2799	-1.18	400	-2.17	400	-3.14	505	-2.43	431	-1.42	400	-0.22	0.353488	427.2	20.3553
3.2907	-1.66	400	-1.65	400	-3.24	504	-2.05	429	-1.5	400	-0.3	0.318292	426.6	20.1484
3.3015	-1.11	400	-1.99	400	-4.15	503	-2.32	427	-1.71	400	-0.51	0.513494	426	19.9474
3.3123	-1.92	400	-1.63	400	-3.21	503	-2.65	425	-0.99	400	0.21	0.388458	425.6	19.9464
3.3232	-1.56	400	-1.7	400	-3.44	503	-2.22	423	-1.27	400	-0.07	0.382837	425.2	19.9534
3.334	-1.22	400	-1.11	400	-3.44	502	-2.39	421	-1.55	400	-0.35	0.436571	424.6	19.7727
3.3448	-1.46	400	-1.79	400	-3.96	501	-2.15	419	-1.38	400	-0.18	0.473005	424	19.5985
3.3556	-1.12	400	-1.48	400	-3.63	500	-2.25	417	-1.29	400	-0.09	0.461396	423.4	19.4309
3.3665	-1.19	400	-2.26	400	-3.53	499	-2.64	415	-1.16	400	0.04	0.450451	422.8	19.2702
3.3773	-1.42	400	-2.17	400	-3.14	498	-2.41	413	-1.63	400	-0.43	0.304247	422.2	19.1165
3.3881	-1.31	400	-1.96	400	-3.23	497	-2	411	-1.14	400	0.06	0.367715	421.6	18.97
3.3989	-1.41	400	-2.14	400	-3.88	496	-2.57	409	-1.02	400	0.18	0.498965	421	18.8308
3.4098	-0.97	400	-2.38	400	-3.48	495	-2.38	407	-1.03	400	0.17	0.47273	420.4	18.6992
3.4206	-1.17	400	-2.42	400	-3.37	494	-2.1	405	-1.08	400	0.12	0.42395	419.8	18.5753
3.4314	-1.5	400	-1.36	400	-2.5	493	-1.97	403	-1.53	400	-0.33	0.208744	419.2	18.4591
3.4422	-1.26	400	-2.22	400	-3.54	491	-2.1	400	-1.32	400	-0.12	0.412388	418.2	18.2
3.453	-1.52	400	-1.7	400	-3.02	490	-2.47	400	-1.69	400	-0.49	0.286862	418	18
3.4639	-1.03	400	-2.16	400	-3.57	489	-2.03	400	-1.32	400	-0.12	0.441151	417.8	17.8
3.4747	-1.35	400	-1.52	400	-4.23	488	-2.67	400	-1.34	400	-0.14	0.559637	417.6	17.6
3.4855	-1.52	400	-1.74	400	-3.99	488	-2.41	400	-1.34	400	-0.14	0.482794	417.6	17.6
3.4963	-1.43	400	-2.29	400	-3.3	488	-2.18	400	-1.28	400	-0.08	0.360813	417.6	17.6
3.5072	-1.08	400	-1.63	400	-3.61	487	-2.54	400	-1.13	400	0.07	0.480826	417.4	17.4
3.518	-1.61	400	-1.41	400	-3.52	486	-2.24	400	-1.53	400	-0.33	0.391783	417.2	17.2
3.5288	-1.74	400	-1.29	400	-3.41	485	-2.3	400	-1.07	400	0.13	0.418777	417	17
3.5396	-1.33	400	-1.54	400	-3.76	484	-2.17	400	-1.3	400	-0.1	0.462331	416.8	16.8
3.5505	-1.33	400	-2.44	400	-3.5	483	-2.63	400	-1.21	400	-0.01	0.428199	416.6	16.6
3.5613	-1.34	400	-2.24	400	-3.5	482	-2.23	400	-1.3	400	-0.1	0.400729	416.4	16.4
3.5721	-1.73	400	-2.08	400	-3.61	481	-1.91	400	-1.11	400	0.09	0.414299	416.2	16.2
3.5829	-1.42	400	-1.85	400	-3.06	480	-2.47	400	-1.47	400	-0.27	0.313825	416	16
3.5938	-1.46	400	-1.55	400	-3.07	479	-2.57	400	-1.78	400	-0.58	0.314271	415.8	15.8
3.6046	-1.65	400	-1.72	400	-3.8	478	-2.48	400	-1.97	400	-0.77	0.396694	415.6	15.6
3.6154	-1.49	400	-1.74	400	-3.58	477	-2.5	400	-1.18	400	0.02	0.430028	415.4	15.4
3.6262	-1.35	400	-2.18	400	-3.31	476	-2.32	400	-1.28	400	-0.08	0.371018	415.2	15.2
3.6371	-1.33	400	-1.8	400	-3.36	475	-2.41	400	-1.19	400	0.01	0.39756	415	15
3.6479	-1.15	400	-1.93	400	-3.37	474	-2.45	400	-1.09	400	0.11	0.426314	414.8	14.8
3.6587	-1.44	400	-2.15	400	-3.69	473	-2.39	400	-1.11	400	0.09	0.448036	414.6	14.6
3.6695	-1.58	400	-2	400	-3.62	472	-2.45	400	-1.4	400	-0.2	0.396409	414.4	14.4
3.6804	-1.81	400	-2.52	400	-3.61	471	-2.71	400	-1.37	400	-0.17	0.386233	414.2	14.2
3.6912	-1.81	400	-2.58	400	-3.86	470	-2.42	400	-1.17	400	0.03	0.448346	414	14
3.702	-1.24	400	-2	400	-3.73	469	-2.39	400	-1.8	400	-0.6	0.41794	413.8	13.8
3.7128	-1.19	400	-2.03	400	-3.44	468	-2.66	400	-1.42	400	-0.22	0.411891	413.6	13.6
3.7237	-1.58	400	-1.87	400	-3.38	467	-2.31	400	-1.39	400	-0.19	0.35424	413.4	13.4
3.7345	-1.46	400	-1.66	400	-3.05	466	-2.66	400	-1.33	400	-0.13	0.345621	413.2	13.2
3.7453	-1.36	400	-2.31	400	-3.73	465	-2.42	400	-1.04	400	0.16	0.471629	413	13
3.7561	-1.29	400	-2.39	400	-3.4	464	-2.64	400	-1.29	400	-0.09	0.407792	412.8	12.8
3.767	-1.75	400	-1.95	400	-3.37	463	-2.51	400	-1.52	400	-0.32	0.330938	412.6	12.6
3.7778	-1.23	400	-2.22	400	-3.63	462	-2.3	400	-1.6	400	-0.4	0.409641	412.4	12.4
3.7886	-1.52	400	-1.92	400	-3.46	461	-2.6	400	-1.82	400	-0.62	0.347298	412.2	12.2
3.7994	-1.77	400	-2.78	400	-3.35	460	-2.62	400	-1.65	400	-0.45	0.320072	412	12
3.8103	-1.7	400	-2.55	400	-3.06	459	-2.59	400	-2.05	400	-0.85	0.235181	411.8	11.8
3.8211	-1.29	400	-2.27	400	-3.99	458	-2.22	400	-1.68	400	-0.48	0.46192	411.6	11.6
3.8319	-1.28	400	-2.46	400	-3.2	457	-2.3	400	-1.45	400	-0.25	0.351232	411.4	11.4
3.8427	-1.24	400	-2.62	400	-3.56	456	-2.74	400	-1.3	400	-0.1	0.447598	411.2	11.2
3.8536	-1.19	400	-2.65	400	-3.61	455	-2.42	400	-1.52	400	-0.32	0.429597	411	11
3.8644	-1.18	400	-1.97	400	-3.63	454	-2.46	400	-1.64	400	-0.44	0.419316	410.8	10.8
3.8752	-1.8	400	-2.39	400	-3.64	453	-2.39	400	-1.76	400	-0.56	0.339656	410.6	10.6
3.886	-1.57	400	-2.17	400	-3.14	452	-2.47	400	-2.08	400	-0.88	0.258043	410.4	10.4
3.8969	-1.42	400	-1.81	400	-3.39	451	-2.27	400	-1.53	400	-0.33	0.357989	410.2	10.2
3.9077	-1.55	400	-1.73	400	-3.83	450	-3.12	400	-1.53	400	-0.33	0.473291	410	10
3.9185	-1.34	400	-2.37	400	-3.77	449	-2.33	400	-1.04	400	0.16	0.479135	409.8	9.8
3.9293	-1.37	400	-1.9	400	-3.97	448	-2.31	400	-1.42	400	-0.22	0.476032	409.6	9.6
3.9402	-1.19	400	-2.4	400	-3.4	447	-1.92	400	-1.8	400	-0.6	0.368896	409.4	9.4
3.951	-1.72	400	-1.95	400	-3.46	446	-2.6	400	-1.56	400	-0.36	0.348804	409.2	9.2
3.9618	-1.43	400	-2.43	400	-3.6	445	-2.26	400	-2.04	400	-0.84	0.354928	409	9
3.9726	-1.25	400	-2.25	400	-3.3	444	-2.24	400	-1.76	400	-0.56	0.339279	408.8	8.8
3.9835	-1.48	400	-2.14	400	-3.38	443	-2.47	400	-1.67	400	-0.47	0.336473	408.6	8.6
3.9943	-1.55	400	-1.4	400	-3.49	442	-2.59	400	-1.67	400	-0.47	0.396333	408.4	8.4
4.0051	-1.64	400	-2.61	400	-3.52	441	-2.69	400	-1.89	400	-0.69	0.331346	408.2	8.2
4.0159	-1.53	400	-1.76	400	-3.52	440	-2.74	400	-1.99	400	-0.79	0.364848	408	8
4.0268	-1.49	400	-2.23	400	-3.15	439	-2.59	400	-1.78	400	-0.58	0.293639	407.8	7.8
4.0376	-1.64	400	-1.93	400	-3.62	438	-2.31	400	-1.89	400	-0.69	0.352185	407.6	7.6
4.0484	-1.6	400	-2.18	400	-3.67	437	-2.41	400	-1.6	400	-0.4	0.379676	407.4	7.4
4.0592	-1.5	400	-2.53	400	-3.01	436	-2.16	400	-1.64	400	-0.44	0.279739	407.2	7.2
4.0701	-1.45	400	-2.19	400	-3.79	435	-2.22	400	-1.63	400	-0.43	0.41233	407	7
4.0809	-1.27	400	-2.3	400	-3.38	434	-2.56	400	-1.28	400	-0.08	0.402149	406.8	6.8
4.0917	-1.55	400	-2.53	400	-3.41	433	-2.45	400	-1.49	400	-0.29	0.355325	406.6	6.6
4.1025	-1.5	400	-2.53	400	-3.82	432	-2.67	400	-1.58	400	-0.38	0.423474	406.4	6.4
4.1133	-1.06	400	-2.11	400	-3.49	431	-2.32	400	-1.4	400	-0.2	0.421267	406.2	6.2
4.1242	-1.31	400	-2.33	400	-3.78	430	-2.38	400	-1.92	400	-0.72	0.406972	406	6
4.135	-1.31	400	-2.56	400	-3.57	429	-2.27	400	-1.78	400	-0.58	0.382876	405.8	5.8
4.1458	-1.67	400	-2.69	400	-3.49	428	-2.59	400	-1.4	400	-0.2	0.376569	405.6	5.6
4.1566	-1.63	400	-1.84	400	-3.01	427	-2.46	400	-1.31	400	-0.11	0.304779	405.4	5.4
4.1675	-1.56	400	-2.86	400	-3.65	426	-2.52	400	-1.51	400	-0.31	0.405228	405.2	5.2
4.1783	-1.26	400	-2.67	400	-3.06	425	-2.08	400	-1.49	400	-0.29	0.340872	405	5
4.1891	-1.41	400	-2.41	400	-3.61	424	-2.97	400	-1.35	400	-0.15	0.439272	404.8	4.8
4.1999	-1.6	400	-3.14	400	-3.78	423	-2.54	400	-1.26	400	-0.06	0.468547	404.6	4.6
4.2108	-1.42	400	-2.21	400	-4.11	422	-2.83	400	-1.68	400	-0.48	0.480177	404.4	4.4
4.2216	-1.57	400	-2.29	400	-3.83	422	-2.66	400	-1.61	400	-0.41	0.414565	404.4	4.4
4.2324	-1.55	400	-2.23	400	-3.78	422	-2.56	400	-1.47	400	-0.27	0.419087	404.4	4.4
4.2432	-1.56	400	-2.34	400	-3.92	421	-2.21	400	-1.67	400	-0.47	0.422528	404.2	4.2
4.2541	-1.47	400	-2.41	400	-3.97	420	-2.28	400	-1.83	400	-0.63	0.428304	404	4
4.2649	-1.81	400	-1.9	400	-3.55	419	-2.36	400	-1.09	400	0.11	0.406539	403.8	3.8
4.2757	-1.22	400	-2.19	400	-3.44	418	-2.42	400	-1.11	400	0.09	0.427652	403.6	3.6
4.2865	-1.41	400	-2.42	400	-4.02	417	-2.75	400	-1.55	400	-0.35	0.471455	403.4	3.4
4.2974	-1.26	400	-2.09	400	-3.81	417	-2.33	400	-1.47	400	-0.27	0.449293	403.4	3.4
4.3082	-1.57	400	-1.75	400	-4.03	417	-2.88	400	-1.54	400	-0.34	0.486195	403.4	3.4
4.319	-1.59	400	-2.56	400	-3.73	417	-2.52	400	-1.73	400	-0.53	0.381479	403.4	3.4
4.3298	-0.83	400	-2.37	400	-3.55	417	-2.85	400	-1.74	400	-0.54	0.465794	403.4	3.4
4.3407	-1.49	400	-1.92	400	-3.7	416	-2.82	400	-1.71	400	-0.51	0.410797	403.2	3.2
4.3515	-1.87	400	-2.54	400	-3.85	415	-2.59	400	-1.6	400	-0.4	0.389782	403	3
4.3623	-1.46	400	-2.12	400	-3.83	414	-2.6	400	-1.61	400	-0.41	0.426739	402.8	2.8
4.3731	-1.61	400	-2.69	400	-3.47	413	-2.27	400	-1.23	400	-0.03	0.395747	402.6	2.6
4.384	-2.15	400	-2.53	400	-3.67	412	-2.85	400	-1.56	400	-0.36	0.352483	402.4	2.4
4.3948	-2.08	400	-2.36	400	-3.34	411	-2.89	400	-2.03	400	-0.83	0.251655	402.2	2.2
4.4056	-1.86	400	-2.22	400	-3.59	410	-2.69	400	-1.27	400	-0.07	0.392028	402	2
4.4164	-1.92	400	-2.56	400	-3.62	409	-2.81	400	-1.46	400	-0.26	0.37207	401.8	1.8
4.4273	-1.72	400	-2.84	400	-3.64	408	-2.77	400	-1.76	400	-0.56	0.362872	401.6	1.6
4.4381	-1.53	400	-3.15	400	-3.53	407	-2.52	400	-1.42	400	-0.22	0.422291	401.4	1.4
4.4489	-1.56	400	-2.11	400	-3.91	406	-3.02	400	-1.54	400	-0.34	0.457705	401.2	1.2
4.4597	-1.78	400	-2.46	400	-3.57	405	-2.54	400	-1.29	400	-0.09	0.386179	401	1
4.4706	-1.78	400	-2.8	400	-3.64	404	-2.38	400	-1.61	400	-0.41	0.367266	400.8	0.8
4.4814	-1.84	400	-2.31	400	-3.43	403	-2.46	400	-1.52	400	-0.32	0.325721	400.6	0.6
4.4922	-1.6	400	-2.94	400	-2.74	402	-2.86	400	-1.68	400	-0.48	0.29755	400.4	0.4
4.503	-1.56	400	-2.13	400	-4.58	400	-2.41	400	-1.54	400	-0.34	0.559505	400	0
4.5139	-1.78	400	-2	400	-3.62	400	-2.86	400	-1.42	400	-0.22	0.399019	400	0
4.5247	-1.8	400	-2.53	400	-3.68	400	-2.72	400	-1.49	400	-0.29	0.383153	400	0
4.5355	-1.6	400	-1.94	400	-3.39	400	-2.68	400	-1.8	400	-0.6	0.331699	400	0
4.5463	-1.83	400	-2.3	400	-3.6	400	-2.9	400	-1.66	400	-0.46	0.357469	400	0
4.5572	-1.98	400	-1.87	400	-4.07	400	-2.73	400	-1.55	400	-0.35	0.451088	400	0
4.568	-1.99	400	-2.38	400	-3.76	400	-2.28	400	-1.82	400	-0.62	0.343389	400	0
4.5788	-1.71	400	-2.33	400	-3.52	400	-2.46	400	-1.44	400	-0.24	0.360713	400	0
4.5896	-1.87	400	-2.16	400	-4.17	400	-2.73	400	-1.47	400	-0.27	0.469745	400	0
4.6005	-2.3	400	-2.13	400	-3.73	400	-2.64	400	-1.35	400	-0.15	0.387776	400	0
4.6113	-2.01	400	-2.47	400	-3.62	400	-2.49	400	-1.74	400	-0.54	0.321506	400	0
4.6221	-1.89	400	-2.15	400	-3.72	400	-2.88	400	-1.24	400	-0.04	0.426504	400	0
4.6329	-1.69	400	-2.63	400	-3.81	400	-2.74	400	-1.19	400	0.01	0.454097	400	0
4.6438	-1.93	400	-2.49	400	-3.35	400	-2.45	400	-0.8	400	0.4	0.418445	400	0
4.6546	-1.4	400	-2.04	400	-3.98	400	-2.53	400	-1.52	400	-0.32	0.466965	400	0
4.6654	-1.73	400	-2.29	400	-3.6	400	-2.85	400	-2	400	-0.8	0.333116	400	0
4.6762	-2.49	400	-2.57	400	-3.39	400	-2.59	400	-1.74	400	-0.54	0.26145	400	0
4.6871	-1.78	400	-2.66	400	-3.87	400	-2.85	400	-1.61	400	-0.41	0.407487	400	0
4.6979	-1.97	400	-2.04	400	-3.69	400	-2.82	400	-1.79	400	-0.59	0.35411	400	0
4.7087	-1.43	400	-2.07	400	-3.83	400	-2.9	400	-1.75	400	-0.55	0.434	400	0
4.7195	-1.58	400	-2.2	400	-4.23	400	-2.45	400	-1.82	400	-0.62	0.468216	400	0
4.7304	-2.08	400	-2.25	400	-3.9	400	-2.72	400	-1.54	400	-0.34	0.39805	400	0
4.7412	-1.8	400	-2.85	400	-4.04	400	-2.74	400	-1.72	400	-0.52	0.422232	400	0
4.752	-1.82	400	-2.58	400	-4.02	400	-3.01	400	-1.63	400	-0.43	0.432058	400	0
4.7628	-1.79	400	-2.62	400	-3.78	400	-2.76	400	-1.36	400	-0.16	0.419338	400	0
4.7736	-1.93	400	-2.27	400	-3.43	400	-2.79	400	-1.6	400	-0.4	0.32332	400	0
4.7845	-1.65	400	-2.37	400	-3.78	400	-2.75	400	-1.69	400	-0.49	0.392612	400	0
4.7953	-1.66	400	-2.47	400	-3.75	400	-2.42	400	-1.99	400	-0.79	0.355435	400	0
4.8061	-1.38	400	-2.47	400	-3.48	400	-2.5	400	-1.81	400	-0.61	0.356643	400	0
4.8169	-1.29	400	-2.28	400	-3.37	400	-2.59	400	-1.66	400	-0.46	0.36331	400	0
4.8278	-1.87	400	-2.39	400	-3.9	400	-2.92	400	-1.76	400	-0.56	0.391783	400	0
4.8386	-1.36	400	-1.99	400	-3.61	400	-2.71	400	-1.56	400	-0.36	0.412124	400	0
4.8494	-1.58	400	-2.43	400	-3.89	400	-2.58	400	-1.01	400	0.19	0.490198	400	0
4.8602	-2.28	400	-2.27	400	-3.53	400	-3.02	400	-1.39	400	-0.19	0.365012	400	0
4.8711	-1.91	400	-2.51	400	-4.08	400	-2.63	400	-1.57	400	-0.37	0.431184	400	0
4.8819	-1.48	400	-2.46	400	-3.3	400	-2.64	400	-1.87	400	-0.67	0.315119	400	0
4.8927	-1.56	400	-2.55	400	-3.74	400	-2.58	400	-1.62	400	-0.42	0.397744	400	0
4.9035	-2.27	400	-2.28	400	-3.59	400	-2.89	400	-1.92	400	-0.72	0.294737	400	0
4.9144	-1.67	400	-2.31	400	-4.21	400	-2.52	400	-1.27	400	-0.07	0.505387	400	0
4.9252	-1.89	400	-2.89	400	-3.53	400	-2.92	400	-1.76	400	-0.56	0.336235	400	0
4.936	-2.3	400	-2.44	400	-3.53	400	-3.02	400	-2.25	400	-1.05	0.247091	400	0
4.9468	-1.33	400	-2.26	400	-4.04	400	-3.26	400	-1.8	400	-0.6	0.492873	400	0
4.9577	-1.34	400	-2.36	400	-4.21	400	-3.18	400	-1.82	400	-0.62	0.508944	400	0
4.9685	-1.71	400	-2.81	400	-3.61	400	-2.87	400	-1.41	400	-0.21	0.404702	400	0
4.9793	-2.11	400	-2.9	400	-3.71	400	-2.82	400	-2.12	400	-0.92	0.296132	400	0
4.9901	-1.98	407	-2.66	407	-4.24	408	-3.07	407	-1.39	407	-0.19	0.4868	407.2	0.2
5.001	-2.05	413	-2.46	414	-3.74	417	-2.42	415	-1.6	413	-0.4	0.356898	414.4	0.748331
5.0118	-1.52	420	-2.82	421	-4.17	425	-2.69	422	-1.78	419	-0.58	0.466911	421.4	1.02956
5.0226	-2.02	426	-2.48	428	-4.13	434	-2.75	429	-1.53	425	-0.33	0.439174	428.4	1.56844
5.0334	-1.93	433	-2.38	435	-4.59	443	-2.78	436	-1.68	431	-0.48	0.515281	435.6	2.03961
5.0443	-1.55	439	-2.4	442	-4.22	452	-2.96	443	-1.81	437	-0.61	0.475388	442.6	2.5807
5.0551	-2.3	445	-2.5	449	-4.39	461	-2.5	450	-1.73	443	-0.53	0.449206	449.6	3.1241
5.0659	-1.56	452	-2.06	456	-4.21	470	-2.76	457	-1.67	449	-0.47	0.487149	456.8	3.59722
5.0767	-2.13	458	-2.59	463	-3.96	479	-3.07	464	-1.71	455	-0.51	0.389954	463.8	4.14005
5.0876	-1.78	465	-2.66	470	-3.84	487	-2.64	472	-1.71	461	-0.51	0.386	471	4.43847
5.0984	-1.93	471	-2.23	477	-3.44	495	-2.69	479	-1.91	467	-0.71	0.287019	477.8	4.8
5.1092	-1.54	477	-2.88	484	-4	503	-2.53	486	-2.01	473	-0.81	0.419206	484.6	5.16333
5.12	-1.79	483	-2.44	491	-3.95	512	-3.28	493	-1.72	480	-0.52	0.432118	491.8	5.59821
5.1309	-1.9	489	-2.07	498	-3.69	520	-2.55	501	-2.05	486	-0.85	0.328213	498.8	5.97829
5.1417	-1.5	495	-2.17	505	-3.82	528	-2.83	508	-1.84	493	-0.64	0.410651	505.8	6.24019
5.1525	-1.75	501	-1.8	512	-3.94	536	-2.97	515	-1.58	499	-0.38	0.455581	512.6	6.60757
5.1633	-1.46	507	-2.31	518	-3.94	544	-2.88	522	-1.83	505	-0.63	0.434932	519.2	6.9814
5.1742	-2.14	513	-2.68	525	-3.65	552	-2.95	529	-1.56	511	-0.36	0.355283	526	7.34847
5.185	-1.43	520	-3.01	532	-3.67	560	-2.88	536	-1.52	517	-0.32	0.440379	533	7.62889
5.1958	-1.97	526	-2.6	540	-3.77	568	-2.51	543	-1.68	523	-0.48	0.358896	540	7.99375
5.2066	-2.02	532	-2.62	547	-3.86	576	-2.61	550	-1.66	529	-0.46	0.374	546.8	8.36301
5.2175	-1.55	539	-2.15	554	-3.72	584	-2.82	557	-2.04	535	-0.84	0.375348	553.8	8.64523
5.2283	-2.07	545	-2.6	561	-3.8	592	-3.05	564	-1.99	542	-0.79	0.334924	560.8	8.9073
5.2391	-1.81	552	-2.35	568	-3.86	600	-3.04	572	-1.72	548	-0.52	0.402027	568	9.20869
5.2499	-1.95	558	-2.91	575	-3.94	600	-2.52	580	-1.68	554	-0.48	0.397932	573.4	8.26801
5.2608	-2.57	564	-2.6	582	-3.66	600	-2.96	587	-1.87	560	-0.67	0.291537	578.6	7.4135
5.2716	-1.75	571	-2.6	589	-4.08	600	-3.16	594	-1.51	566	-0.31	0.469713	584	6.6106
5.2824	-1.69	577	-2.48	596	-3.49	600	-2.64	600	-1.55	572	-0.35	0.351724	589	6.01664
5.2932	-2.2	583	-2.93	600	-4.4	600	-2.68	600	-1.71	578	-0.51	0.454869	592.2	4.84149
5.3041	-1.71	590	-2.97	600	-3.79	600	-3	600	-1.98	584	-0.78	0.377425	594.8	3.32265
5.3149	-1.9	596	-2.86	600	-3.79	600	-2.49	600	-1.46	590	-0.26	0.402206	597.2	1.95959
5.3257	-1.52	600	-2.88	600	-3.33	600	-2.67	600	-1.74	596	-0.54	0.344549	599.2	0.8
5.3365	-2.49	600	-2.87	600	-4.03	600	-2.71	600	-1.92	600	-0.72	0.346144	600	0
5.3474	-2.33	600	-3.79	600	-3.91	600	-3	600	-2.13	600	-0.93	0.364203	600	0
5.3582	-1.7	600	-2.78	600	-3.96	600	-2.9	600	-1.91	600	-0.71	0.40284	600	0
5.369	-2.38	600	-2.62	600	-3.81	600	-2.99	600	-2.04	600	-0.84	0.303107	600	0
5.3798	-1.96	600	-2.6	600	-3.65	600	-2.93	600	-1.61	600	-0.41	0.359764	600	0
5.3907	-2.45	600	-2.68	600	-4.23	600	-2.54	600	-1.61	600	-0.41	0.425293	600	0
5.4015	-2.17	600	-2.68	600	-3.99	600	-2.94	600	-1.62	600	-0.42	0.397957	600	0
5.4123	-1.49	600	-2.52	600	-3.91	600	-2.99	600	-2.41	600	-1.21	0.395115	600	0
5.4231	-2.01	600	-2.61	600	-3.82	600	-3.14	600	-1.06	600	0.14	0.472963	600	0
5.434	-1.97	600	-2.99	600	-4.03	600	-2.62	600	-2.05	600	-0.85	0.374812	600	0
5.4448	-2.24	600	-2.84	600	-3.96	600	-2.75	600	-1.68	600	-0.48	0.378254	600	0
5.4556	-2.39	600	-2.02	600	-4.03	600	-3.01	600	-2.25	600	-1.05	0.361801	600	0
5.4664	-2.4	600	-2.56	600	-4.29	600	-3.13	600	-1.89	600	-0.69	0.409885	600	0
5.4772	-1.76	600	-2.59	600	-3.4	600	-2.72	600	-1.74	600	-0.54	0.314236	600	0
5.4881	-2.2	600	-2.62	600	-4.42	600	-2.93	600	-2.03	600	-0.83	0.425359	600	0
5.4989	-2.09	600	-2.47	600	-3.46	600	-3	600	-1.8	600	-0.6	0.300842	600	0
5.5097	-2.18	600	-2.35	600	-3.87	600	-2.64	600	-2.01	600	-0.81	0.331738	600	0
5.5205	-1.44	600	-2.25	600	-4.17	600	-2.85	600	-1.65	600	-0.45	0.490718	600	0
5.5314	-1.51	600	-3.29	600	-3.78	600	-2.78	600	-1.89	600	-0.69	0.423119	600	0
5.5422	-1.95	600	-3.26	600	-4.08	600	-2.91	600	-2.09	600	-0.89	0.391911	600	0
5.553	-2.35	600	-3.06	600	-4.27	600	-3.19	600	-2.04	600	-0.84	0.386981	600	0
5.5638	-1.7	600	-2.31	600	-3.78	600	-2.61	600	-1.8	600	-0.6	0.374072	600	0
5.5747	-1.77	600	-3.01	600	-4.17	600	-2.98	600	-2.18	600	-0.98	0.412085	600	0
5.5855	-1.85	600	-2.49	600	-4.08	600	-2.57	600	-1.65	600	-0.45	0.42676	600	0
5.5963	-1.91	600	-2.57	600	-4.21	600	-3.23	600	-1.97	600	-0.77	0.430377	600	0
5.6071	-2	600	-2.5	600	-3.9	600	-2.97	600	-1.93	600	-0.73	0.362478	600	0
5.618	-1.64	600	-2.46	600	-3.94	600	-2.69	600	-1.99	600	-0.79	0.393784	600	0
5.6288	-2.22	600	-2.42	600	-3.91	600	-2.61	600	-1.9	600	-0.7	0.345129	600	0
5.6396	-2.17	600	-2.94	600	-3.77	600	-3.48	600	-1.84	600	-0.64	0.369689	600	0
5.6504	-1.95	600	-2.85	600	-3.71	600	-2.86	600	-1.44	600	-0.24	0.395163	600	0
5.6613	-1.96	600	-2.5	600	-3.85	600	-3.27	600	-1.59	600	-0.39	0.415049	600	0
5.6721	-1.83	600	-2.62	600	-3.97	600	-2.99	600	-1.73	600	-0.53	0.410809	600	0
5.6829	-2.01	600	-3.01	600	-3.99	600	-3.13	600	-1.95	600	-0.75	0.381712	600	0
5.6937	-1.78	600	-2.53	600	-4.38	600	-2.75	600	-2.29	600	-1.09	0.439188	600	0
5.7046	-2.02	600	-2.7	600	-3.82	600	-2.64	600	-1.51	600	-0.31	0.387639	600	0
5.7154	-1.55	600	-2.62	600	-4.06	600	-2.81	600	-1.64	600	-0.44	0.45715	600	0
5.7262	-2.24	600	-2.3	600	-4.17	600	-3.03	600	-1.28	600	-0.08	0.480194	600	0
5.737	-2.03	600	-2.44	600	-3.87	600	-2.83	600	-1.78	600	-0.58	0.36662	600	0
5.7479	-2.28	600	-2.62	600	-3.69	600	-2.61	600	-1.9	600	-0.7	0.298245	600	0
5.7587	-2.3	600	-2.76	600	-4.01	600	-2.76	600	-2.14	600	-0.94	0.328079	600	0
5.7695	-1.84	600	-2.78	600	-4.31	600	-2.98	600	-1.78	600	-0.58	0.461285	600	0
5.7803	-1.8	600	-2.87	600	-4.1	600	-3.26	600	-1.68	600	-0.48	0.455197	600	0
5.7912	-1.95	600	-2.72	600	-3.8	600	-3.17	600	-1.92	600	-0.72	0.360658	600	0
5.802	-2.42	600	-3.1	600	-4.01	600	-3.06	600	-1.81	600	-0.61	0.368388	600	0
5.8128	-1.8	600	-2.69	600	-3.55	600	-2.96	600	-1.55	600	-0.35	0.370284	600	0
5.8236	-2.04	600	-3.04	600	-4.04	600	-3.34	600	-1.97	600	-0.77	0.394735	600	0
5.8345	-2.35	600	-2.99	600	-4.37	600	-3.1	600	-2.04	600	-0.84	0.401659	600	0
5.8453	-1.99	600	-2.89	600	-4.09	600	-3.42	600	-1.65	600	-0.45	0.449159	600	0
5.8561	-2.07	600	-3.16	600	-4.28	600	-2.95	600	-2.13	600	-0.93	0.403403	600	0
5.8669	-1.73	600	-3.21	600	-4.08	600	-3.33	600	-1.29	600	-0.09	0.523759	600	0
5.8778	-1.67	600	-2.77	600	-3.23	600	-3.17	600	-1.64	600	-0.44	0.352358	600	0
5.8886	-2.12	600	-2.55	600	-4.65	600	-2.98	600	-1.39	600	-0.19	0.545375	600	0
5.8994	-1.88	600	-3.31	600	-3.62	600	-3.31	600	-1.41	600	-0.21	0.443109	600	0
5.9102	-2.35	600	-2.58	600	-3.84	600	-2.89	600	-1.47	600	-0.27	0.384585	600	0
5.9211	-2.11	600	-2.99	600	-4.27	600	-3.12	600	-1.88	600	-0.68	0.423941	600	0
5.9319	-2.01	600	-2.94	600	-4.28	600	-3.26	600	-1.63	600	-0.43	0.469666	600	0
5.9427	-2.14	600	-2.74	600	-3.87	600	-2.77	600	-2.06	600	-0.86	0.32383	600	0
5.9535	-1.85	600	-2.74	600	-4.26	600	-3.05	600	-1.26	600	-0.06	0.516269	600	0
5.9644	-2.03	600	-2.73	600	-3.65	600	-3.09	600	-2.09	600	-0.89	0.306176	600	0
5.9752	-2.11	600	-2.61	600	-4.42	600	-2.86	600	-2.36	600	-1.16	0.406687	600	0
5.986	-2.18	600	-2.43	600	-4.16	600	-3.15	600	-1.6	600	-0.4	0.44087	600	0
5.9968	-1.99	600	-2.29	600	-3.9	600	-3.13	600	-1.34	600	-0.14	0.447337	600	0
6.0077	-1.88	600	-2.96	600	-4.16	600	-3.16	600	-1.56	600	-0.36	0.467607	600	0
6.0185	-1.72	600	-2.68	600	-4.19	600	-3.19	600	-1.92	600	-0.72	0.448408	600	0
6.0293	-2.33	600	-2.74	600	-4.15	600	-2.79	600	-1.72	600	-0.52	0.399932	600	0
6.0401	-2.27	600	-3.17	600	-3.96	600	-3.05	600	-1.73	600	-0.53	0.384988	600	0
6.051	-2.4	600	-2.71	600	-3.62	600	-2.68	600	-1.54	600	-0.34	0.333317	600	0
6.0618	-2.11	600	-2.52	600	-3.77	600	-2.83	600	-1.79	600	-0.59	0.340905	600	0
6.0726	-2.06	600	-2.9	600	-4.42	600	-2.69	600	-1.71	600	-0.51	0.467575	600	0
6.0834	-2.6	600	-3.03	600	-3.88	600	-2.94	600	-1.76	600	-0.56	0.342905	600	0
6.0943	-2.18	600	-2.5	600	-4.13	600	-3.81	600	-2.08	600	-0.88	0.429174	600	0
6.1051	-2.28	600	-2.21	600	-3.9	600	-2.97	600	-1.75	600	-0.55	0.374265	600	0
6.1159	-1.94	600	-2.8	600	-4.28	600	-3.47	600	-1.82	600	-0.62	0.464762	600	0
6.1267	-1.92	600	-2.6	600	-4.2	600	-2.91	600	-2.08	600	-0.88	0.405468	600	0
6.1376	-2.1	600	-3.15	600	-4.32	600	-2.82	600	-1.91	600	-0.71	0.429965	600	0
6.1484	-2.15	600	-2.34	600	-4.28	600	-2.93	600	-1.63	600	-0.43	0.453901	600	0
6.1592	-2.11	600	-3.13	600	-4.12	600	-3.44	600	-1.81	600	-0.61	0.426772	600	0
6.17	-2.29	600	-3.28	600	-4.42	600	-3.15	600	-2.18	600	-0.98	0.404557	600	0
6.1808	-2.26	600	-2.69	600	-3.89	600	-3.13	600	-1.93	600	-0.73	0.343191	600	0
6.1917	-2.19	600	-3.37	600	-4.34	600	-2.85	600	-2.03	600	-0.83	0.420852	600	0
6.2025	-2.22	600	-3.03	600	-4.02	600	-3.24	600	-1.49	600	-0.29	0.435167	600	0
6.2133	-2.38	600	-2.64	600	-4.28	600	-3.1	600	-1.54	600	-0.34	0.45107	600	0
6.2241	-2.15	600	-2.92	600	-4.17	600	-3.07	600	-1.85	600	-0.65	0.405221	600	0
6.235	-2.14	600	-2.49	600	-4.5	600	-2.97	600	-1.82	600	-0.62	0.469559	600	0
6.2458	-2.45	600	-2.58	600	-3.77	600	-3.5	600	-1.93	600	-0.73	0.342646	600	0
6.2566	-2.15	600	-2.57	600	-3.69	600	-2.9	600	-1.5	600	-0.3	0.366352	600	0
6.2674	-2.25	600	-2.97	600	-4.83	600	-2.93	600	-2.05	600	-0.85	0.490893	600	0
6.2783	-2.08	600	-3.09	600	-4.33	600	-2.82	600	-1.88	600	-0.68	0.434868	600	0
6.2891	-2.33	600	-3.07	600	-4	600	-2.82	600	-1.8	600	-0.6	0.369738	600	0
6.2999	-2.68	600	-2.3	600	-4.29	600	-3.04	600	-2.01	600	-0.81	0.396593	600	0
6.3107	-2.09	600	-2.87	600	-4.42	600	-3.3	600	-2.01	600	-0.81	0.442283	600	0
6.3216	-2.26	600	-2.56	600	-4.66	600	-3.13	600	-2.25	600	-1.05	0.451236	600	0
6.3324	-1.83	600	-3.09	600	-4.11	600	-2.96	600	-1.71	600	-0.51	0.443667	600	0
6.3432	-2.56	600	-2.72	600	-4.57	600	-2.94	600	-1.91	600	-0.71	0.442188	600	0
6.354	-2.2	600	-2.67	600	-4.2	600	-2.65	600	-1.7	600	-0.5	0.418457	600	0
6.3649	-2.34	600	-2.88	600	-4.39	600	-2.9	600	-2.09	600	-0.89	0.399262	600	0
6.3757	-2.68	600	-3.12	600	-4.29	600	-3.28	600	-1.83	600	-0.63	0.401261	600	0
6.3865	-2.38	600	-2.63	600	-4.13	600	-2.69	600	-1.69	600	-0.49	0.398266	600	0
6.3973	-2.24	600	-3.17	600	-3.56	600	-3.12	600	-2.11	600	-0.91	0.282719	600	0
6.4082	-2.39	600	-2.72	600	-4.64	600	-2.96	600	-2	600	-0.8	0.454141	600	0
6.419	-2.28	600	-3.07	600	-4.53	600	-2.95	600	-1.6	600	-0.4	0.487941	600	0
6.4298	-2.36	600	-3.63	600	-4.5	600	-2.99	600	-1.92	600	-0.72	0.457766	600	0
6.4406	-2.56	600	-3.07	600	-4.04	600	-3.13	600	-1.47	600	-0.27	0.420198	600	0
6.4515	-2.61	600	-2.37	600	-4.45	600	-2.87	600	-2.28	600	-1.08	0.396958	600	0
6.4623	-2.13	600	-2.82	600	-3.79	600	-3.08	600	-1.44	600	-0.24	0.402981	600	0
6.4731	-2.02	600	-2.76	600	-4.23	600	-3.62	600	-2.15	600	-0.95	0.425918	600	0
6.4839	-2.44	600	-2.9	600	-3.28	600	-3.53	600	-2.02	600	-0.82	0.274365	600	0
6.4948	-2.45	600	-2.54	600	-4.48	600	-2.9	600	-1.86	600	-0.66	0.441334	600	0
6.5056	-2.78	600	-2.44	600	-4.04	600	-3.11	600	-2.15	600	-0.95	0.326506	600	0
6.5164	-1.81	600	-2.84	600	-4	600	-3.28	600	-1.84	600	-0.64	0.422085	600	0
6.5272	-2.48	600	-2.89	600	-4.02	600	-3.39	600	-1.98	600	-0.78	0.353828	600	0
6.5381	-2.5	600	-3.04	600	-4.08	600	-3.13	600	-2.23	600	-1.03	0.318412	600	0
6.5489	-2.61	600	-2.63	600	-4.67	600	-3.07	600	-1.59	600	-0.39	0.501693	600	0
6.5597	-2.32	600	-3.37	600	-3.7	600	-3.16	600	-1.94	600	-0.74	0.330642	600	0
6.5705	-2.4	600	-2.72	600	-4.33	600	-3.37	600	-1.77	600	-0.57	0.437234	600	0
6.5814	-2.41	600	-3.18	600	-4.12	600	-3.07	600	-1.93	600	-0.73	0.372013	600	0
6.5922	-2.31	600	-2.92	600	-4.47	600	-3.59	600	-2.38	600	-1.18	0.405347	600	0
6.603	-2.71	600	-2.71	600	-4.46	600	-3.19	600	-1.97	600	-0.77	0.412097	600	0
6.6138	-2.39	600	-2.77	600	-4.75	600	-3.3	600	-2.17	600	-0.97	0.4603	600	0
6.6247	-2.16	600	-2.98	600	-4	600	-3.4	600	-1.94	600	-0.74	0.383114	600	0
6.6355	-2.01	600	-2.64	600	-3.97	600	-2.9	600	-2.06	600	-0.86	0.356435	600	0
6.6463	-2.17	600	-2.8	600	-4.53	600	-2.81	600	-1.89	600	-0.69	0.458803	600	0
6.6571	-2.42	600	-2.89	600	-4.22	600	-3.58	600	-1.87	600	-0.67	0.415338	600	0
6.668	-2.04	600	-3.15	600	-4.4	600	-2.99	600	-2.33	600	-1.13	0.409358	600	0
6.6788	-2.25	600	-3.06	600	-4.12	600	-3.31	600	-2.15	600	-0.95	0.36309	600	0
6.6896	-2.52	600	-3.06	600	-4.44	600	-3.32	600	-2.38	600	-1.18	0.366791	600	0
6.7004	-2.22	600	-2.98	600	-4.28	600	-3.09	600	-2.1	600	-0.9	0.390097	600	0
6.7113	-2.27	600	-2.86	600	-4.4	600	-3.46	600	-2.3	600	-1.1	0.39983	600	0
6.7221	-2.5	600	-2.94	600	-4.42	600	-3.23	600	-2.12	600	-0.92	0.392968	600	0
6.7329	-1.93	600	-2.38	600	-4.35	600	-3.27	600	-2.25	600	-1.05	0.438903	600	0
6.7437	-2.47	600	-2.13	600	-4.5	600	-3.04	600	-1.78	600	-0.58	0.476682	600	0
6.7546	-2.46	600	-2.92	600	-4.99	600	-3.2	600	-2.06	600	-0.86	0.50509	600	0
6.7654	-2.31	600	-2.59	600	-4.7	600	-3.02	600	-2.13	600	-0.93	0.462547	600	0
6.7762	-1.86	600	-2.92	600	-4.61	600	-3.15	600	-2.3	600	-1.1	0.469334	600	0
6.787	-2.08	600	-2.54	600	-4.66	600	-3.06	600	-2	600	-0.8	0.486317	600	0
6.7979	-2.17	600	-2.22	600	-4.74	600	-3.35	600	-2.25	600	-1.05	0.499766	600	0
6.8087	-2.69	600	-3.23	600	-4.2	600	-2.69	600	-1.91	600	-0.71	0.377989	600	0
6.8195	-2.34	600	-3.43	600	-4.8	600	-3.03	600	-2.14	600	-0.94	0.473892	600	0
6.8303	-2.62	600	-3.01	600	-4.68	600	-3.17	600	-1.84	600	-0.64	0.464807	600	0
6.8411	-2.69	600	-2.99	600	-4.5	600	-3.2	600	-2.23	600	-1.03	0.381096	600	0
6.852	-2.26	600	-2.9	600	-4.64	600	-2.96	600	-1.97	600	-0.77	0.463418	600	0
6.8628	-2.5	600	-2.99	600	-4.39	600	-3	600	-2.15	600	-0.95	0.381085	600	0
6.8736	-2.39	600	-3.03	600	-4.6	600	-3.28	600	-1.82	600	-0.62	0.469091	600	0
6.8844	-2.5	600	-3	600	-4.28	600	-3.18	600	-2.04	600	-0.84	0.376988	600	0
6.8953	-2.24	600	-2.85	600	-4.92	600	-3.38	600	-1.78	600	-0.58	0.543761	600	0
6.9061	-2.58	600	-3	600	-4.12	600	-3.18	600	-2.29	600	-1.09	0.313171	600	0
6.9169	-1.97	600	-3.58	600	-4.74	600	-3.35	600	-2	600	-0.8	0.522756	600	0
6.9277	-2.04	600	-3.15	600	-4.32	600	-2.98	600	-1.86	600	-0.66	0.441701	600	0
6.9386	-2.21	600	-2.97	600	-4.87	600	-3.08	600	-2	600	-0.8	0.506207	600	0
6.9494	-2.57	600	-3.23	600	-4.66	600	-3.39	600	-1.7	600	-0.5	0.488621	600	0
6.9602	-2.42	600	-3.01	600	-4.14	600	-3.59	600	-2.68	600	-1.48	0.311888	600	0
6.971	-2.39	600	-2.82	600	-5.1	600	-3.04	600	-1.8	600	-0.6	0.559089	600	0
6.9819	-2.41	600	-3.08	600	-4.37	600	-3.25	600	-2.28	600	-1.08	0.372953	600	0
6.9927	-2.93	600	-3.17	600	-4.75	600	-3.4	600	-2.08	600	-0.88	0.43295	600	0
7.0035	-2.93	600	-3.27	600	-4.93	600	-3.52	600	-1.71	600	-0.51	0.518039	600	0
7.0143	-2.4	600	-3.24	600	-4.85	600	-3.63	600	-1.81	600	-0.61	0.523456	600	0
7.0252	-2.52	600	-3.36	600	-4.24	600	-3.13	600	-2.33	600	-1.13	0.33883	600	0
7.036	-2.56	600	-2.95	600	-4.18	600	-3.63	600	-2.3	600	-1.1	0.346303	600	0
7.0468	-2.4	600	-2.46	600	-4.53	600	-3.26	600	-2.01	600	-0.81	0.448167	600	0
7.0576	-1.94	600	-3.29	600	-4.6	600	-3.34	600	-2.15	600	-0.95	0.478817	600	0
7.0685	-2.51	600	-3.14	600	-4.34	600	-3.28	600	-1.34	600	-0.14	0.492893	600	0
7.0793	-2.42	600	-3.55	600	-4.3	600	-3.25	600	-1.96	600	-0.76	0.41394	600	0
7.0901	-2.54	600	-3.19	600	-5.05	600	-3.76	600	-1.67	600	-0.47	0.570258	600	0
7.1009	-2.4	600	-2.96	600	-4.6	600	-3.37	600	-1.96	600	-0.76	0.454053	600	0
7.1118	-2.65	600	-3.21	600	-4.52	600	-3.38	600	-2.08	600	-0.88	0.407841	600	0
7.1226	-2.42	600	-3.16	600	-4.01	600	-3	600	-2.27	600	-1.07	0.309118	600	0
7.1334	-2.32	600	-3.08	600	-4.49	600	-3.31	600	-2.53	600	-1.33	0.380744	600	0
7.1442	-2.55	600	-3.75	600	-4.65	600	-3.25	600	-2.1	600	-0.9	0.448442	600	0
7.1551	-2.53	600	-2.71	600	-4.68	600	-3.42	600	-2.3	600	-1.1	0.430806	600	0
7.1659	-2.62	600	-3.57	600	-4.69	600	-3.13	600	-2.03	600	-0.83	0.450937	600	0
7.1767	-1.86	600	-2.68	600	-4.75	600	-3.29	600	-1.88	600	-0.68	0.535942	600	0
7.1875	-2.6	600	-3.46	600	-4.78	600	-3.41	600	-2.23	600	-1.03	0.439484	600	0
7.1984	-2.22	600	-2.8	600	-4.21	600	-3.44	600	-2.04	600	-0.84	0.400679	600	0
7.2092	-1.94	600	-3.6	600	-4.39	600	-3.36	600	-2.05	600	-0.85	0.470355	600	0
7.22	-2.97	600	-2.97	600	-4.5	600	-3.39	600	-2.02	600	-0.82	0.401236	600	0
7.2308	-2.71	600	-3.48	600	-4.53	600	-3.11	600	-2.29	600	-1.09	0.382147	600	0
7.2417	-2.47	600	-3.36	600	-4.77	600	-3.58	600	-2.22	600	-1.02	0.452559	600	0
7.2525	-2.22	600	-2.85	600	-4.42	600	-2.89	600	-1.87	600	-0.67	0.437253	600	0
7.2633	-2.44	600	-2.83	600	-4.16	600	-2.93	600	-2.51	600	-1.31	0.310622	600	0
7.2741	-2.92	600	-2.84	600	-4.25	600	-3.34	600	-1.85	600	-0.65	0.388883	600	0
7.285	-2.65	600	-3.5	600	-4.71	600	-3.27	600	-2.47	600	-1.27	0.396131	600	0
7.2958	-2.07	600	-3.14	600	-4.12	600	-3.57	600	-2.17	600	-0.97	0.396971	600	0
7.3066	-2.54	600	-2.65	600	-4.48	600	-3.3	600	-1.71	600	-0.51	0.461417	600	0
7.3174	-2.36	600	-3.72	600	-5.02	600	-3.31	600	-2	600	-0.8	0.534176	600	0
7.3283	-2.17	600	-2.85	600	-4.25	600	-3.4	600	-2.26	600	-1.06	0.386039	600	0
7.3391	-2.18	600	-2.79	600	-4.29	600	-3.34	600	-2.24	600	-1.04	0.391707	600	0
7.3499	-2.23	600	-3.05	600	-4.11	600	-3.72	600	-2.22	600	-1.02	0.382918	600	0
7.3607	-2.7	600	-3.23	600	-4.45	600	-2.94	600	-2.09	600	-0.89	0.390095	600	0
7.3716	-2.87	600	-3.27	600	-4.75	600	-3.16	600	-2.45	600	-1.25	0.389256	600	0
7.3824	-2.06	600	-3.66	600	-4.27	600	-2.92	600	-1.73	600	-0.53	0.475683	600	0
7.3932	-2.23	600	-2.99	600	-4.07	600	-3.32	600	-2.1	600	-0.9	0.362869	600	0
7.404	-2.62	600	-2.74	600	-4.28	600	-3.28	600	-1.98	600	-0.78	0.385175	600	0
7.4149	-2.53	600	-3.14	600	-4.15	600	-3.2	600	-2.07	600	-0.87	0.351161	600	0
7.4257	-2.61	600	-3.04	600	-4.47	600	-3.62	600	-2.43	600	-1.23	0.370818	600	0
7.4365	-2.49	600	-3.26	600	-4.08	600	-3.49	600	-1.81	600	-0.61	0.396669	600	0
7.4473	-2.59	600	-3.12	600	-3.89	600	-3.41	600	-1.96	600	-0.76	0.333476	600	0

## Sheet: Figure 5E
Time (s)	1	1	1	2	2	2	3	3	3	4	4	4	5	5	5	6	6	6	7	7	7	8	8	8	9	9	9	10	10	10	Cell 1	Cell 2	Cell 3	Mean	SEM
0	-5.1	-1.28	-24	-15.56	-0.35	-13.95	-7.7	-0.64	-9.48	-11	-2.77	-11.48	-16.04	-0.66	-18	-8.88	-0.82	-7.85	-9.66	-0.51	-15.59	-11.04	-1.19	-8.23	-3.35	-1.57	-8.53	-11.37	-1.65	-12.88	-9.97	-1.144	-12.999	-8.03767	3.55601
0.1	-9.33	-0.73	-24.2	-8.88	-1.19	-16.98	-0.88	-1.44	-9.48	-8.97	-1.58	-10.9	-9.65	-1.44	-15.42	-3.13	-1.72	-11	-8.29	-1.5	-15.14	-11.58	-0.31	-8.93	-4.97	-0.88	-10.05	-5.5	-1.14	-11.36	-7.118	-1.193	-13.346	-7.219	3.50863
0.21	-11.17	-1.31	-24.43	-6.48	-0.48	-15.6	-9.08	-3.43	-13.01	-11.72	-2.65	-11.04	-16.22	-1.79	-20.55	-3.71	0.78	-14.01	-10.96	-0.4	-14.99	-13.68	-1.8	-13.08	-16.07	-1.97	-10.49	-10.65	-2.25	-11.38	-10.974	-1.53	-14.858	-9.12067	3.95748
0.31	-15.54	-1.13	-26.72	-13.57	-0.33	-14.19	-4.68	-3.29	-12.57	-13	-2.51	-13.49	-9.47	-2.3	-16.26	-10.97	0.06	-17.03	-11.1	-0.85	-14.74	-9.43	-1.24	-13.14	-13.27	-2.22	-9.22	-22.23	-3.67	-11.05	-12.326	-1.748	-14.841	-9.63833	4.01141
0.41	-7.78	-1.57	-21.99	-12.65	-1.49	-14.81	-10.69	-0.59	-11.88	-14.45	-0.14	-19.27	-8.18	-1.81	-21.57	-6.43	-2.49	-12.79	-8.61	0.05	-14.11	-4.9	-1.48	-11.65	-8.74	-1.11	-11.02	-5.01	-1.37	-5.05	-8.744	-1.2	-14.414	-8.11933	3.82732
0.52	-7.84	-1.39	-22.91	-13.63	-1.47	-11.65	-9.2	-2.38	-11.75	-13.78	-2.96	-15.69	-10.49	-1.98	-19.88	-8.65	-0.2	-12.18	-6.83	-0.69	-8.94	-5.48	0.69	-9.26	-0.7	-2.24	-9.23	-6.48	0.33	-12.27	-8.308	-1.229	-13.376	-7.63767	3.52252
0.62	-13	-1.24	-25.57	-6.4	-1.53	-17.35	-4.51	-3.31	-15.37	-5.53	-2.37	-12.61	-4.53	-0.77	-18.99	-7.37	0.35	-11.15	-13.84	-0.43	-18.85	-12.61	-2.06	-10.32	-7.93	-2.29	-7	-18.32	-2.3	-10.43	-9.404	-1.595	-14.764	-8.58767	3.82341
0.72	16.96	1.64	23.15	18.56	1.37	30.3	7.87	-0.56	38.54	19.13	0.47	22.55	16.91	1.73	22.12	18.87	1.95	22.15	13.23	3.23	20.23	19.89	2.64	25.25	14.19	1.59	20.01	14.88	2.09	21.12	16.049	1.615	24.542	14.0687	6.69211
0.83	14.77	0.47	30.71	16.08	2.92	32.45	18.44	-0.1	32.62	24.15	2.69	29.63	19.89	3.02	22.98	14.97	4.64	25.26	14.46	3.22	23.7	13	2.71	25.75	13.78	-0.08	27.71	18.46	1.83	25.4	16.8	2.132	27.621	15.5177	7.38592
0.93	16.61	2.18	33.98	11.81	3.3	35.69	13.34	1.93	44.28	17.42	1.79	21.5	13.81	2.64	22.08	14.93	2.49	27.09	11.61	2.08	26.16	25.24	4.22	23.06	11.05	0.69	24.39	11.99	1.63	27.28	14.781	2.295	28.551	15.209	7.58247
1.03	15.88	1.63	23.91	12.66	2.25	30.75	13.31	1	36.46	19.01	-0.08	22.63	19.45	1.97	30.11	12.8	2.08	27.66	16.89	3.41	21.72	20.27	3.56	21.45	20.29	1.38	28.32	14.22	-0.17	24.47	16.478	1.703	26.748	14.9763	7.26875
1.14	12.13	0.79	31.35	16.48	1.69	35.92	19.75	0.79	31.59	11.21	3.29	27.86	18.9	1.17	22.9	17.89	2.42	26.75	18.33	1	20.74	12.96	2.91	25.38	23.63	1.81	29.7	13.04	0.52	25.66	16.432	1.639	27.785	15.2853	7.56944
1.24	20.96	1.46	34.18	18.38	1.23	31.49	14.54	1.35	37.63	16.37	1.42	24.92	26.24	0.93	23.33	17.85	2.54	26.26	14.88	3.59	22.79	20.48	3.97	23.9	19.75	1.51	26	22.75	1.46	24.08	19.22	1.946	27.458	16.208	7.51708
1.34	15.12	0.63	26.36	22	2.57	29.59	20.57	0.52	32.37	11.8	1.85	24.36	14.86	1.36	14.84	20.28	2	26.62	17.95	4.33	24.87	14.92	1.62	28.09	19.03	0.75	24.86	12.66	1.4	20.04	16.919	1.703	25.2	14.6073	6.88077
1.45	17.76	2.02	25.66	15.95	2.68	32.49	16.27	2.45	30.85	18.01	1.69	28.45	15.41	2.5	27.83	17.51	2.54	27.62	16.79	2.8	23.93	15.85	3.45	24.33	16.55	2.14	21.45	16.77	-0.09	21.03	16.687	2.218	26.364	15.0897	7.01596
1.55	12.85	1.29	28.43	18.2	1.8	28.65	20.01	1.15	33.9	21.15	2.52	24.89	13.1	0.96	24.41	8.26	3.12	31.76	12.66	4.1	19.74	11.67	1.9	24.35	20.98	2.22	23.84	18.69	2.2	19.21	15.757	2.126	25.918	14.6003	6.89247
1.66	18.91	2.02	22.72	20.01	1.61	25.6	18.38	0.85	31.37	16.3	3.63	19.83	16.24	2.07	20.85	9.29	2.07	23.48	13.47	3.77	23.48	15.74	1.4	23.81	18.7	2.23	24.87	13.12	-0.29	19.6	16.016	1.936	23.561	13.8377	6.3369
1.76	-4.76	-0.66	-17.03	-16.48	-0.39	-8.51	2.26	-1.39	-4.55	-6.5	0.54	-12.76	-3.95	-1.16	-11.7	-4.3	-1.04	-10.16	-6.64	1.68	-13.94	-5.51	1.28	-5.15	-1.73	-2.5	-4.06	0.69	0.71	-11.06	-4.692	-0.293	-9.892	-4.959	2.77421
1.86	-7.31	0.56	-20.37	-6.59	-1.18	-14.27	-15.33	-1.96	-8.93	-13.95	-0.61	-18.7	-6.38	-1.18	-17.1	-11.17	-1.54	-15.89	-11.5	-0.63	-21.28	-8.43	-1.01	-9.03	-1.39	-1.59	-8.07	-8.75	-1.12	-14.75	-9.08	-1.026	-14.839	-8.315	4.00577
1.97	-15.65	0.35	-11.25	-7.07	-1.15	-11.43	-10.17	-1.3	-9.66	-12.95	-0.7	-24.99	-10.84	-1.07	-13.27	-7.11	-2.25	-12.04	-8.8	-0.05	-14.07	-10.63	-1.14	-12.69	-5.99	-1	-12.92	-2.2	-0.96	-10.31	-9.141	-0.927	-13.263	-7.777	3.62581
2.07	-9.47	-0.71	-17.9	-4.42	0.15	-12.23	-13.29	-1.65	-11.06	-12.28	-0.59	-21.57	-4.9	-0.71	-14.11	-6.54	-2.09	-18.75	-8.61	1.22	-11.67	-3.94	-1.57	-9.06	-11.1	-0.58	-7.51	-7.25	-0.9	-13.26	-8.18	-0.743	-13.712	-7.545	3.75727
2.17	-7.55	0.29	-13.91	-9.97	-1.16	-14.25	-13.35	-2.01	-12.16	-6.19	0.69	-14.39	-8.08	-1.39	-22.13	-7.1	-0.4	-10.86	-4.81	-0.14	-14.02	-8.43	-1.21	-8.05	-7.98	-1.14	-15.14	-0.11	0.44	-11.35	-7.357	-0.603	-13.626	-7.19533	3.76029
2.28	0.71	0.04	-14.57	-2.73	-0.57	-15.12	-8.5	-2.21	-14.41	-9.81	-0.8	-18.38	0.52	-0.55	-19.84	-9.23	-1.08	-10.92	-6.83	0.32	-15.16	-12.75	-0.74	-12.09	-14.34	-1.31	-7.99	-16.2	-0.8	-11.76	-7.916	-0.77	-14.024	-7.57	3.83001
2.38	-9.16	0.57	-19.71	-9.62	-0.75	-17.44	0.34	-0.82	-16.36	-6.43	-0.56	-20.12	-12.29	-1.58	-16.84	-4.06	-0.97	-14.21	-5.41	0.36	-14.13	-3.96	-1.94	-10.77	-9.4	-1.02	-9.55	-12.25	-1.61	-13.99	-7.224	-0.832	-15.312	-7.78933	4.18956
2.48	-3.58	-0.31	-14.79	-18.05	-0.79	-11.26	-15.46	-1.41	-14.27	-8.74	-0.65	-20.42	-14.23	-0.3	-16.65	-9.1	-0.6	-12.62	-14.69	-1.27	-14.95	-18.23	-1	-13.46	-8.64	-0.76	-16	-5.76	-1.13	-10.95	-11.648	-0.822	-14.537	-9.00233	4.17433
2.59	-8.34	0.41	-18.04	-14.47	-0.5	-7.8	-6.98	-2.09	-18.6	-8.05	-1.27	-16.11	-6.2	-0.43	-15.87	-5	-0.42	-10.48	-9.85	-0.36	-10.51	-12.02	-1.33	-11.14	-11.25	-0.89	-10.57	-10.07	-0.08	-15.47	-9.223	-0.696	-13.459	-7.79267	3.75313
2.69	-8.27	0.35	-15.61	-6.33	0.42	-11.03	-11.09	-1.31	-14.39	-11.2	-0.37	-19.74	-4.85	-0.67	-20.87	-6.09	0.87	-14.32	-13.99	0.35	-16.85	-13.45	-2.54	-11.87	-7.79	-1.19	-13.57	-7.05	-1.74	-15.65	-9.011	-0.583	-15.39	-8.328	4.28803
2.79	-7.29	0.77	-10.35	-11.64	-1.12	-9.64	-7.08	-2.46	-11.72	-3.19	-1.57	-18.46	-11.21	-0.1	-14.3	-10.24	-1.14	-17.39	-2.07	0.31	-19.55	3.89	-1.99	-12.57	-8.97	-1.28	-11.91	-6.3	-2.42	-18.21	-6.41	-1.1	-14.41	-7.30667	3.86833

## Sheet: Figure 5F
Title: R10 Date: 2021/09/07 16:26
Parameters for step (1): Holding dF/F0: 0.0 % Tolerance range: -1.0 - 1.0 % Exposure time: 10 ms Binning: 4x4
Parameters for step (2): Holding dF/F0: -3.0 % Tolerance range: -4.0 - -2.0 %
Parameters for step (3): Holding dF/F0: 3.0 % Tolerance range: 2.0 - 4.0 %
Bleaching correction function: exp. offset = 2205,87 * exp(-0,0004 * x) + 11460,94 R^2: 0,9735 Video duration: 27,62 s Framerate: 91,25
										patch-clamp
# Measurement	Time	F	F_bleach_correct	dF/F0	dF/F0_bleach_correct	Wavelength	Info	Step		time (s)	Membrane potential (mV)
0	0.011	13836.7	0	?	0	535	Calibration	-		0.0001	-0.06237
1	0.0219	13840	0	?	0	535	Calibration	-		0.0002	-0.06202
2	0.0329	13833.1	0	?	0	535	Calibration	-		0.0003	-0.06166
3	0.0438	13771	0	?	0	535	Calibration	-		0.0004	-0.06133
4	0.0548	13744.5	0	?	0	535	Calibration	-		0.0005	-0.06107
5	0.0657	13743	0	?	0	535	Calibration	-		0.0006	-0.06082
6	0.0767	13770.3	0	?	0	535	Calibration	-		0.0007	-0.06064
7	0.0877	13813.7	0	?	0	535	Calibration	-		0.0008	-0.06048
8	0.0986	13734.1	0	?	0	535	Calibration	-		0.0009	-0.06035
9	0.1096	13772.2	0	?	0	535	Calibration	-		0.001	-0.06022
10	0.1205	13803.6	0	?	0	535	Calibration	-		0.0011	-0.06011
11	0.1315	13682.6	0	?	0	535	Calibration	-		0.0012	-0.06
12	0.1425	13718.2	0	?	0	535	Calibration	-		0.0013	-0.05989
13	0.1534	13615.9	0	?	0	535	Calibration	-		0.0014	-0.0598
14	0.1644	13793.4	0	?	0	535	Calibration	-		0.0015	-0.05971
15	0.1753	13705.2	0	?	0	535	Calibration	-		0.0016	-0.05965
16	0.1863	13734.9	0	?	0	535	Calibration	-		0.0017	-0.05958
17	0.1972	13737.7	0	?	0	535	Calibration	-		0.0018	-0.05953
18	0.2082	13785.5	0	?	0	535	Calibration	-		0.0019	-0.05948
19	0.2192	13817.4	0	?	0	535	Calibration	-		0.002	-0.05941
20	0.2301	13705.2	0	?	0	535	Calibration	-		0.0021	-0.05936
21	0.2411	13729	0	?	0	535	Calibration	-		0.0022	-0.05929
22	0.252	13747.5	0	?	0	535	Calibration	-		0.0023	-0.05923
23	0.263	13737	0	?	0	535	Calibration	-		0.0024	-0.05919
24	0.274	13758.6	0	?	0	535	Calibration	-		0.0025	-0.05912
25	0.2849	13704.9	0	?	0	535	Calibration	-		0.0026	-0.05908
26	0.2959	13707.2	0	?	0	535	Calibration	-		0.0027	-0.05908
27	0.3068	13651.8	0	?	0	535	Calibration	-		0.0028	-0.05903
28	0.3178	13636.9	0	?	0	535	Calibration	-		0.0029	-0.05898
29	0.3288	13682.2	0	?	0	535	Calibration	-		0.003	-0.05896
30	0.3397	13642.6	0	?	0	535	Calibration	-		0.0031	-0.0589
31	0.3507	13747	0	?	0	535	Calibration	-		0.0032	-0.05885
32	0.3616	13638.6	0	?	0	535	Calibration	-		0.0033	-0.05881
33	0.3726	13730.3	0	?	0	535	Calibration	-		0.0034	-0.05876
34	0.3835	13609.1	0	?	0	535	Calibration	-		0.0035	-0.05873
35	0.3945	13642.1	0	?	0	535	Calibration	-		0.0036	-0.05868
36	0.4055	13670	0	?	0	535	Calibration	-		0.0037	-0.05865
37	0.4164	13671.8	0	?	0	535	Calibration	-		0.0038	-0.05863
38	0.4274	13631.7	0	?	0	535	Calibration	-		0.0039	-0.05859
39	0.4383	13633.9	0	?	0	535	Calibration	-		0.004	-0.05854
40	0.4493	13702.1	0	?	0	535	Calibration	-		0.0041	-0.0585
41	0.4602	13780.2	0	?	0	535	Calibration	-		0.0042	-0.05849
42	0.4712	13673.3	0	?	0	535	Calibration	-		0.0043	-0.05847
43	0.4822	13589.5	0	?	0	535	Calibration	-		0.0044	-0.05845
44	0.4931	13673	0	?	0	535	Calibration	-		0.0045	-0.05844
45	0.5041	13602.7	0	?	0	535	Calibration	-		0.0046	-0.05842
46	0.515	13542	0	?	0	535	Calibration	-		0.0047	-0.05839
47	0.526	13660.8	0	?	0	535	Calibration	-		0.0048	-0.05837
48	0.537	13654.4	0	?	0	535	Calibration	-		0.0049	-0.05836
49	0.5479	13568.3	0	?	0	535	Calibration	-		0.005	-0.05831
50	0.5589	13680	0	?	0	535	Calibration	-		0.0051	-0.05826
51	0.5698	13737	0	?	0	535	Calibration	-		0.0052	-0.05823
52	0.5808	13490.4	0	?	0	535	Calibration	-		0.0053	-0.05823
53	0.5917	13591.7	0	?	0	535	Calibration	-		0.0054	-0.05818
54	0.6027	13664.6	0	?	0	535	Calibration	-		0.0055	-0.05816
55	0.6137	13687.8	0	?	0	535	Calibration	-		0.0056	-0.05813
56	0.6246	13591.5	0	?	0	535	Calibration	-		0.0057	-0.05812
57	0.6356	13600	0	?	0	535	Calibration	-		0.0058	-0.05812
58	0.6465	13632.9	0	?	0	535	Calibration	-		0.0059	-0.05809
59	0.6575	13570	0	?	0	535	Calibration	-		0.006	-0.05808
60	0.6685	13632	0	?	0	535	Calibration	-		0.0061	-0.05804
61	0.6794	13529.6	0	?	0	535	Calibration	-		0.0062	-0.058
62	0.6904	13631.8	0	?	0	535	Calibration	-		0.0063	-0.058
63	0.7013	13615.6	0	?	0	535	Calibration	-		0.0064	-0.05798
64	0.7123	13571.9	0	?	0	535	Calibration	-		0.0065	-0.05794
65	0.7232	13562.8	0	?	0	535	Calibration	-		0.0066	-0.05792
66	0.7342	13570.1	0	?	0	535	Calibration	-		0.0067	-0.05789
67	0.7452	13573.9	0	?	0	535	Calibration	-		0.0068	-0.05787
68	0.7561	13638.4	0	?	0	535	Calibration	-		0.0069	-0.05785
69	0.7671	13656.4	0	?	0	535	Calibration	-		0.007	-0.05781
70	0.778	13497.6	0	?	0	535	Calibration	-		0.0071	-0.0578
71	0.789	13560.3	0	?	0	535	Calibration	-		0.0072	-0.05781
72	0.8	13595.6	0	?	0	535	Calibration	-		0.0073	-0.05779
73	0.8109	13776.8	0	?	0	535	Calibration	-		0.0074	-0.05773
74	0.8219	13547.8	0	?	0	535	Calibration	-		0.0075	-0.05773
75	0.8328	13588.1	0	?	0	535	Calibration	-		0.0076	-0.05771
76	0.8438	13644.1	0	?	0	535	Calibration	-		0.0077	-0.05771
77	0.8547	13629.6	0	?	0	535	Calibration	-		0.0078	-0.05768
78	0.8657	13570.6	0	?	0	535	Calibration	-		0.0079	-0.05768
79	0.8767	13665.4	0	?	0	535	Calibration	-		0.008	-0.05768
80	0.8876	13631.5	0	?	0	535	Calibration	-		0.0081	-0.05765
81	0.8986	13610.9	0	?	0	535	Calibration	-		0.0082	-0.05763
82	0.9095	13536.3	0	?	0	535	Calibration	-		0.0083	-0.0576
83	0.9205	13554.6	0	?	0	535	Calibration	-		0.0084	-0.05759
84	0.9315	13564.7	0	?	0	535	Calibration	-		0.0085	-0.05757
85	0.9424	13663	0	?	0	535	Calibration	-		0.0086	-0.05754
86	0.9534	13579.9	0	?	0	535	Calibration	-		0.0087	-0.05751
87	0.9643	13651.5	0	?	0	535	Calibration	-		0.0088	-0.05751
88	0.9753	13546.2	0	?	0	535	Calibration	-		0.0089	-0.05753
89	0.9862	13591.3	0	?	0	535	Calibration	-		0.009	-0.05753
90	0.9972	13583.7	0	?	0	535	Calibration	-		0.0091	-0.05753
91	1.0082	13648.7	0	?	0	535	Calibration	-		0.0092	-0.05751
92	1.0191	13582.4	0	?	0	535	Calibration	-		0.0093	-0.0575
93	1.0301	13516	0	?	0	535	Calibration	-		0.0094	-0.05748
94	1.041	13626.1	0	?	0	535	Calibration	-		0.0095	-0.05746
95	1.052	13635.5	0	?	0	535	Calibration	-		0.0096	-0.05746
96	1.063	13600	0	?	0	535	Calibration	-		0.0097	-0.05746
97	1.0739	13628.2	0	?	0	535	Calibration	-		0.0098	-0.05745
98	1.0849	13592.7	0	?	0	535	Calibration	-		0.0099	-0.05745
99	1.0958	13644	0	?	0	535	Calibration	-		0.01	-0.05744
100	1.1068	13585	0	?	0	535	Calibration	-		0.0101	-0.05743
101	1.1178	13550.1	0	?	0	535	Calibration	-		0.0102	-0.05741
102	1.1287	13624.1	0	?	0	535	Calibration	-		0.0103	-0.0574
103	1.1397	13476	0	?	0	535	Calibration	-		0.0104	-0.0574
104	1.1506	13712.6	0	?	0	535	Calibration	-		0.0105	-0.05738
105	1.1616	13578.5	0	?	0	535	Calibration	-		0.0106	-0.05738
106	1.1725	13553.5	0	?	0	535	Calibration	-		0.0107	-0.05736
107	1.1835	13618.2	0	?	0	535	Calibration	-		0.0108	-0.05737
108	1.1945	13641.3	0	?	0	535	Calibration	-		0.0109	-0.05737
109	1.2054	13574.1	0	?	0	535	Calibration	-		0.011	-0.05735
110	1.2164	13567	0	?	0	535	Calibration	-		0.0111	-0.05734
111	1.2273	13552.8	0	?	0	535	Calibration	-		0.0112	-0.05735
112	1.2383	13538	0	?	0	535	Calibration	-		0.0113	-0.05737
113	1.2492	13502.3	0	?	0	535	Calibration	-		0.0114	-0.05739
114	1.2602	13562	0	?	0	535	Calibration	-		0.0115	-0.05735
115	1.2712	13640.5	0	?	0	535	Calibration	-		0.0116	-0.05735
116	1.2821	13571.6	0	?	0	535	Calibration	-		0.0117	-0.05737
117	1.2931	13455.7	0	?	0	535	Calibration	-		0.0118	-0.05737
118	1.304	13591	0	?	0	535	Calibration	-		0.0119	-0.05735
119	1.315	13557.7	0	?	0	535	Calibration	-		0.012	-0.05734
120	1.326	13541.7	0	?	0	535	Calibration	-		0.0121	-0.05736
121	1.3369	13585.2	0	?	0	535	Calibration	-		0.0122	-0.05736
122	1.3479	13642.7	0	?	0	535	Calibration	-		0.0123	-0.05737
123	1.3588	13626.2	0	?	0	535	Calibration	-		0.0124	-0.05734
124	1.3698	13596.5	0	?	0	535	Calibration	-		0.0125	-0.05733
125	1.3808	13515	0	?	0	535	Calibration	-		0.0126	-0.05733
126	1.3917	13572	0	?	0	535	Calibration	-		0.0127	-0.05731
127	1.4027	13554.4	0	?	0	535	Calibration	-		0.0128	-0.05731
128	1.4136	13583.2	0	?	0	535	Calibration	-		0.0129	-0.05731
129	1.4246	13544.8	0	?	0	535	Calibration	-		0.013	-0.05731
130	1.4355	13496.9	0	?	0	535	Calibration	-		0.0131	-0.05732
131	1.4465	13547	0	?	0	535	Calibration	-		0.0132	-0.05731
132	1.4575	13542.1	0	?	0	535	Calibration	-		0.0133	-0.05728
133	1.4684	13558.1	0	?	0	535	Calibration	-		0.0134	-0.05724
134	1.4794	13512.3	0	?	0	535	Calibration	-		0.0135	-0.05724
135	1.4903	13478.8	0	?	0	535	Calibration	-		0.0136	-0.05723
136	1.5013	13637.8	0	?	0	535	Calibration	-		0.0137	-0.05724
137	1.5122	13527.9	0	?	0	535	Calibration	-		0.0138	-0.05725
138	1.5232	13541.6	0	?	0	535	Calibration	-		0.0139	-0.05723
139	1.5342	13586.5	0	?	0	535	Calibration	-		0.014	-0.05722
140	1.5451	13583.2	0	?	0	535	Calibration	-		0.0141	-0.05722
141	1.5561	13584.2	0	?	0	535	Calibration	-		0.0142	-0.0572
142	1.567	13510.5	0	?	0	535	Calibration	-		0.0143	-0.05718
143	1.578	13536.3	0	?	0	535	Calibration	-		0.0144	-0.0572
144	1.589	13540.5	0	?	0	535	Calibration	-		0.0145	-0.05719
145	1.5999	13526.1	0	?	0	535	Calibration	-		0.0146	-0.05718
146	1.6109	13615	0	?	0	535	Calibration	-		0.0147	-0.05717
147	1.6218	13603	0	?	0	535	Calibration	-		0.0148	-0.05715
148	1.6328	13608.1	0	?	0	535	Calibration	-		0.0149	-0.05715
149	1.6437	13443.3	0	?	0	535	Calibration	-		0.015	-0.05713
150	1.6547	13506.5	0	?	0	535	Calibration	-		0.0151	-0.05712
151	1.6657	13479.2	0	?	0	535	Calibration	-		0.0152	-0.05713
152	1.6766	13545	0	?	0	535	Calibration	-		0.0153	-0.05715
153	1.6876	13597.4	0	?	0	535	Calibration	-		0.0154	-0.05713
154	1.6985	13511	0	?	0	535	Calibration	-		0.0155	-0.0571
155	1.7095	13585.4	0	?	0	535	Calibration	-		0.0156	-0.0571
156	1.7205	13576.6	0	?	0	535	Calibration	-		0.0157	-0.05711
157	1.7314	13530	0	?	0	535	Calibration	-		0.0158	-0.0571
158	1.7424	13491.7	0	?	0	535	Calibration	-		0.0159	-0.0571
159	1.7533	13486.1	0	?	0	535	Calibration	-		0.016	-0.0571
160	1.7643	13549.8	0	?	0	535	Calibration	-		0.0161	-0.05709
161	1.7752	13529.6	0	?	0	535	Calibration	-		0.0162	-0.05707
162	1.7862	13513.8	0	?	0	535	Calibration	-		0.0163	-0.05709
163	1.7972	13510.4	0	?	0	535	Calibration	-		0.0164	-0.05708
164	1.8081	13672	0	?	0	535	Calibration	-		0.0165	-0.05709
165	1.8191	13616.6	0	?	0	535	Calibration	-		0.0166	-0.05711
166	1.83	13514.9	0	?	0	535	Calibration	-		0.0167	-0.05711
167	1.841	13595.9	0	?	0	535	Calibration	-		0.0168	-0.0571
168	1.852	13523.5	0	?	0	535	Calibration	-		0.0169	-0.05712
169	1.8629	13590.7	0	?	0	535	Calibration	-		0.017	-0.05712
170	1.8739	13541.8	0	?	0	535	Calibration	-		0.0171	-0.05713
171	1.8848	13563.4	0	?	0	535	Calibration	-		0.0172	-0.05713
172	1.8958	13552	0	?	0	535	Calibration	-		0.0173	-0.05715
173	1.9068	13622.7	0	?	0	535	Calibration	-		0.0174	-0.05715
174	1.9177	13528.5	0	?	0	535	Calibration	-		0.0175	-0.05715
175	1.9287	13548	0	?	0	535	Calibration	-		0.0176	-0.05714
176	1.9396	13520.7	0	?	0	535	Calibration	-		0.0177	-0.05715
177	1.9506	13559.3	0	?	0	535	Calibration	-		0.0178	-0.05715
178	1.9615	13505.4	0	?	0	535	Calibration	-		0.0179	-0.05717
179	1.9725	13495.7	0	?	0	535	Calibration	-		0.018	-0.05716
180	1.9835	13456.8	0	?	0	535	Calibration	-		0.0181	-0.05717
181	1.9944	13543.3	0	?	0	535	Calibration	-		0.0182	-0.05717
182	2.0054	13468.6	0	?	0	535	Calibration	-		0.0183	-0.05717
183	2.0163	13438.2	0	?	0	535	Calibration	-		0.0184	-0.05716
184	2.0273	13400.2	0	?	0	535	Calibration	-		0.0185	-0.05713
185	2.0382	13558.3	0	?	0	535	Calibration	-		0.0186	-0.05713
186	2.0492	13487.8	0	?	0	535	Calibration	-		0.0187	-0.05715
187	2.0602	13545.3	0	?	0	535	Calibration	-		0.0188	-0.05712
188	2.0711	13508.3	0	?	0	535	Calibration	-		0.0189	-0.0571
189	2.0821	13497.2	0	?	0	535	Calibration	-		0.019	-0.05711
190	2.093	13555.3	0	?	0	535	Calibration	-		0.0191	-0.05712
191	2.104	13496.3	0	?	0	535	Calibration	-		0.0192	-0.05712
192	2.115	13537.2	0	?	0	535	Calibration	-		0.0193	-0.05709
193	2.1259	13528.2	0	?	0	535	Calibration	-		0.0194	-0.0571
194	2.1369	13523.4	0	?	0	535	Calibration	-		0.0195	-0.05709
195	2.1478	13467	0	?	0	535	Calibration	-		0.0196	-0.05709
196	2.1588	13503.7	0	?	0	535	Calibration	-		0.0197	-0.05707
197	2.1697	13545.9	0	?	0	535	Calibration	-		0.0198	-0.05707
198	2.1807	13467	0	?	0	535	Calibration	-		0.0199	-0.05706
199	2.1917	13502.4	0	?	0	535	Calibration	-		0.02	-0.05705
200	2.2026	13418.2	0	?	0	535	Calibration	-		0.0201	-0.05704
201	2.2136	13516.1	0	?	0	535	Calibration	-		0.0202	-0.05705
202	2.2245	13495.7	0	?	0	535	Calibration	-		0.0203	-0.05705
203	2.2355	13410.6	0	?	0	535	Calibration	-		0.0204	-0.05704
204	2.2465	13561.9	0	?	0	535	Calibration	-		0.0205	-0.05706
205	2.2574	13551.8	0	?	0	535	Calibration	-		0.0206	-0.05705
206	2.2684	13475	0	?	0	535	Calibration	-		0.0207	-0.05703
207	2.2793	13472.9	0	?	0	535	Calibration	-		0.0208	-0.05704
208	2.2903	13410	0	?	0	535	Calibration	-		0.0209	-0.05701
209	2.3012	13492.5	0	?	0	535	Calibration	-		0.021	-0.05699
210	2.3122	13537.6	0	?	0	535	Calibration	-		0.0211	-0.05699
211	2.3232	13489	0	?	0	535	Calibration	-		0.0212	-0.05699
212	2.3341	13442.6	0	?	0	535	Calibration	-		0.0213	-0.05698
213	2.3451	13562.3	0	?	0	535	Calibration	-		0.0214	-0.05698
214	2.356	13451.5	0	?	0	535	Calibration	-		0.0215	-0.05698
215	2.367	13374.7	0	?	0	535	Calibration	-		0.0216	-0.05696
216	2.378	13499	0	?	0	535	Calibration	-		0.0217	-0.05696
217	2.3889	13464.5	0	?	0	535	Calibration	-		0.0218	-0.05695
218	2.3999	13528.7	0	?	0	535	Calibration	-		0.0219	-0.05694
219	2.4108	13475.2	0	?	0	535	Calibration	-		0.022	-0.05694
220	2.4218	13430.6	0	?	0	535	Calibration	-		0.0221	-0.05691
221	2.4328	13556.9	0	?	0	535	Calibration	-		0.0222	-0.05689
222	2.4437	13408.4	0	?	0	535	Calibration	-		0.0223	-0.05688
223	2.4547	13479	0	?	0	535	Calibration	-		0.0224	-0.05688
224	2.4656	13489.3	0	?	0	535	Calibration	-		0.0225	-0.05687
225	2.4766	13472.1	0	?	0	535	Calibration	-		0.0226	-0.05686
226	2.4875	13450.2	0	?	0	535	Calibration	-		0.0227	-0.05686
227	2.4985	13433.3	0	?	0	535	Calibration	-		0.0228	-0.05686
228	2.5095	13468	0	?	0	535	Calibration	-		0.0229	-0.05688
229	2.5204	13473.4	0	?	0	535	Calibration	-		0.023	-0.05688
230	2.5314	13523	0	?	0	535	Calibration	-		0.0231	-0.05692
231	2.5423	13458.3	0	?	0	535	Calibration	-		0.0232	-0.05692
232	2.5533	13484.5	0	?	0	535	Calibration	-		0.0233	-0.05692
233	2.5642	13440.4	0	?	0	535	Calibration	-		0.0234	-0.05692
234	2.5752	13407.1	0	?	0	535	Calibration	-		0.0235	-0.05689
235	2.5862	13495	0	?	0	535	Calibration	-		0.0236	-0.05689
236	2.5971	13440	0	?	0	535	Calibration	-		0.0237	-0.05688
237	2.6081	13516.7	0	?	0	535	Calibration	-		0.0238	-0.05685
238	2.619	13372.1	0	?	0	535	Calibration	-		0.0239	-0.05683
239	2.63	13466	0	?	0	535	Calibration	-		0.024	-0.05683
240	2.641	13524.4	0	?	0	535	Calibration	-		0.0241	-0.05682
241	2.6519	13578.9	0	?	0	535	Calibration	-		0.0242	-0.05682
242	2.6629	13451.2	0	?	0	535	Calibration	-		0.0243	-0.05681
243	2.6738	13445	0	?	0	535	Calibration	-		0.0244	-0.05679
244	2.6848	13439	0	?	0	535	Calibration	-		0.0245	-0.05681
245	2.6958	13554.4	0	?	0	535	Calibration	-		0.0246	-0.05681
246	2.7067	13517.5	0	?	0	535	Calibration	-		0.0247	-0.05677
247	2.7177	13497.4	0	?	0	535	Calibration	-		0.0248	-0.05679
248	2.7286	13483.7	0	?	0	535	Calibration	-		0.0249	-0.05677
249	2.7396	13416.2	0	?	0	535	Calibration	-		0.025	-0.05676
250	2.7505	13419.1	0	?	0	535	Calibration	-		0.0251	-0.05674
251	2.7615	13484.2	0	?	0	535	Calibration	-		0.0252	-0.05672
252	2.7725	13401.8	0	?	0	535	Calibration	-		0.0253	-0.0567
253	2.7834	13470.9	0	?	0	535	Calibration	-		0.0254	-0.05672
254	2.7944	13391.7	0	?	0	535	Calibration	-		0.0255	-0.05671
255	2.8053	13447.1	0	?	0	535	Calibration	-		0.0256	-0.0567
256	2.8163	13469.4	0	?	0	535	Calibration	-		0.0257	-0.05669
257	2.8272	13550.1	0	?	0	535	Calibration	-		0.0258	-0.05667
258	2.8382	13477.5	0	?	0	535	Calibration	-		0.0259	-0.05666
259	2.8492	13398.5	0	?	0	535	Calibration	-		0.026	-0.05665
260	2.8601	13498.4	0	?	0	535	Calibration	-		0.0261	-0.05663
261	2.8711	13389.2	0	?	0	535	Calibration	-		0.0262	-0.05662
262	2.882	13494.5	0	?	0	535	Calibration	-		0.0263	-0.05662
263	2.893	13433.5	0	?	0	535	Calibration	-		0.0264	-0.05659
264	2.904	13439.9	0	?	0	535	Calibration	-		0.0265	-0.05659
265	2.9149	13482	0	?	0	535	Calibration	-		0.0266	-0.0566
266	2.9259	13505.2	0	?	0	535	Calibration	-		0.0267	-0.0566
267	2.9368	13487.2	0	?	0	535	Calibration	-		0.0268	-0.0566
268	2.9478	13498.7	0	?	0	535	Calibration	-		0.0269	-0.05659
269	2.9587	13495.8	0	?	0	535	Calibration	-		0.027	-0.05657
270	2.9697	13431.6	0	?	0	535	Calibration	-		0.0271	-0.05658
271	2.9807	13375.9	0	?	0	535	Calibration	-		0.0272	-0.05659
272	2.9916	13395.3	0	?	0	535	Calibration	-		0.0273	-0.05657
273	3.0026	13418.5	0	?	0	535	Calibration	-		0.0274	-0.05655
274	3.0135	13367	0	?	0	535	Calibration	-		0.0275	-0.05652
275	3.0245	13453.9	0	?	0	535	Calibration	-		0.0276	-0.05651
276	3.0355	13475.1	0	?	0	535	Calibration	-		0.0277	-0.0565
277	3.0464	13555.8	0	?	0	535	Calibration	-		0.0278	-0.0565
278	3.0574	13449.5	0	?	0	535	Calibration	-		0.0279	-0.05649
279	3.0683	13436.9	0	?	0	535	Calibration	-		0.028	-0.0565
280	3.0793	13463.9	0	?	0	535	Calibration	-		0.0281	-0.05652
281	3.0902	13451.9	0	?	0	535	Calibration	-		0.0282	-0.0565
282	3.1012	13434.5	0	?	0	535	Calibration	-		0.0283	-0.05651
283	3.1122	13475.4	0	?	0	535	Calibration	-		0.0284	-0.05654
284	3.1231	13430.4	0	?	0	535	Calibration	-		0.0285	-0.05655
285	3.1341	13348.3	0	?	0	535	Calibration	-		0.0286	-0.05653
286	3.145	13388.5	0	?	0	535	Calibration	-		0.0287	-0.05652
287	3.156	13546.8	0	?	0	535	Calibration	-		0.0288	-0.05652
288	3.167	13449.8	0	?	0	535	Calibration	-		0.0289	-0.05653
289	3.1779	13425.3	0	?	0	535	Calibration	-		0.029	-0.05651
290	3.1889	13472.3	0	?	0	535	Calibration	-		0.0291	-0.05649
291	3.1998	13462	0	?	0	535	Calibration	-		0.0292	-0.05649
292	3.2108	13433.1	0	?	0	535	Calibration	-		0.0293	-0.05648
293	3.2217	13544.4	0	?	0	535	Calibration	-		0.0294	-0.05647
294	3.2327	13320.9	0	?	0	535	Calibration	-		0.0295	-0.05646
295	3.2437	13540.4	0	?	0	535	Calibration	-		0.0296	-0.05648
296	3.2546	13380	0	?	0	535	Calibration	-		0.0297	-0.05649
297	3.2656	13330.4	0	?	0	535	Calibration	-		0.0298	-0.05649
298	3.2765	13451.4	0	?	0	535	Calibration	-		0.0299	-0.05646
299	3.2875	13434	0	?	0	535	Calibration	-		0.03	-0.05646
300	3.2985	13351.4	0	?	0	535	Calibration	-		0.0301	-0.05647
301	3.3094	13447.2	0	?	0	535	Calibration	-		0.0302	-0.05649
302	3.3204	13462.8	0	?	0	535	Calibration	-		0.0303	-0.05649
303	3.3313	13442.2	0	?	0	535	Calibration	-		0.0304	-0.05648
304	3.3423	13439.5	0	?	0	535	Calibration	-		0.0305	-0.05645
305	3.3532	13545.3	0	?	0	535	Calibration	-		0.0306	-0.05647
306	3.3642	13467.7	0	?	0	535	Calibration	-		0.0307	-0.05648
307	3.3752	13409.4	0	?	0	535	Calibration	-		0.0308	-0.05648
308	3.3861	13348.7	0	?	0	535	Calibration	-		0.0309	-0.05648
309	3.3971	13449.5	0	?	0	535	Calibration	-		0.031	-0.05647
310	3.408	13411	0	?	0	535	Calibration	-		0.0311	-0.05648
311	3.419	13443.9	0	?	0	535	Calibration	-		0.0312	-0.05647
312	3.43	13455.4	0	?	0	535	Calibration	-		0.0313	-0.05645
313	3.4409	13503	0	?	0	535	Calibration	-		0.0314	-0.05644
314	3.4519	13395.3	0	?	0	535	Calibration	-		0.0315	-0.05644
315	3.4628	13370.6	0	?	0	535	Calibration	-		0.0316	-0.05644
316	3.4738	13377.6	0	?	0	535	Calibration	-		0.0317	-0.05646
317	3.4847	13339.5	0	?	0	535	Calibration	-		0.0318	-0.05646
318	3.4957	13386.1	0	?	0	535	Calibration	-		0.0319	-0.05648
319	3.5067	13463	0	?	0	535	Calibration	-		0.032	-0.05646
320	3.5176	13430.4	0	?	0	535	Calibration	-		0.0321	-0.05645
321	3.5286	13368.1	0	?	0	535	Calibration	-		0.0322	-0.05645
322	3.5395	13440.7	0	?	0	535	Calibration	-		0.0323	-0.05644
323	3.5505	13418.5	0	?	0	535	Calibration	-		0.0324	-0.05645
324	3.5615	13509.2	0	?	0	535	Calibration	-		0.0325	-0.05644
325	3.5724	13461.8	0	?	0	535	Calibration	-		0.0326	-0.05642
326	3.5834	13435.3	0	?	0	535	Calibration	-		0.0327	-0.05641
327	3.5943	13496.9	0	?	0	535	Calibration	-		0.0328	-0.05641
328	3.6053	13414.4	0	?	0	535	Calibration	-		0.0329	-0.0564
329	3.6162	13490.7	0	?	0	535	Calibration	-		0.033	-0.05641
330	3.6272	13465.3	0	?	0	535	Calibration	-		0.0331	-0.05641
331	3.6382	13439.7	0	?	0	535	Calibration	-		0.0332	-0.05641
332	3.6491	13330.3	0	?	0	535	Calibration	-		0.0333	-0.05642
333	3.6601	13418.5	0	?	0	535	Calibration	-		0.0334	-0.05639
334	3.671	13464.2	0	?	0	535	Calibration	-		0.0335	-0.05637
335	3.682	13384.7	0	?	0	535	Calibration	-		0.0336	-0.05641
336	3.693	13451.1	0	?	0	535	Calibration	-		0.0337	-0.0564
337	3.7039	13420	0	?	0	535	Calibration	-		0.0338	-0.05639
338	3.7149	13354.4	0	?	0	535	Calibration	-		0.0339	-0.05641
339	3.7258	13409.9	0	?	0	535	Calibration	-		0.034	-0.05641
340	3.7368	13363.8	0	?	0	535	Calibration	-		0.0341	-0.0564
341	3.7477	13316.8	0	?	0	535	Calibration	-		0.0342	-0.0564
342	3.7587	13401.4	0	?	0	535	Calibration	-		0.0343	-0.05639
343	3.7697	13436.9	0	?	0	535	Calibration	-		0.0344	-0.0564
344	3.7806	13436.8	0	?	0	535	Calibration	-		0.0345	-0.0564
345	3.7916	13417	0	?	0	535	Calibration	-		0.0346	-0.0564
346	3.8025	13321.1	0	?	0	535	Calibration	-		0.0347	-0.05643
347	3.8135	13430.1	0	?	0	535	Calibration	-		0.0348	-0.05641
348	3.8245	13465.8	0	?	0	535	Calibration	-		0.0349	-0.05641
349	3.8354	13385.9	0	?	0	535	Calibration	-		0.035	-0.05642
350	3.8464	13379.6	0	?	0	535	Calibration	-		0.0351	-0.05641
351	3.8573	13420.5	0	?	0	535	Calibration	-		0.0352	-0.0564
352	3.8683	13409.2	0	?	0	535	Calibration	-		0.0353	-0.0564
353	3.8792	13408.4	0	?	0	535	Calibration	-		0.0354	-0.05638
354	3.8902	13349.2	0	?	0	535	Calibration	-		0.0355	-0.05636
355	3.9012	13396.5	0	?	0	535	Calibration	-		0.0356	-0.05636
356	3.9121	13411.2	0	?	0	535	Calibration	-		0.0357	-0.05637
357	3.9231	13277.2	0	?	0	535	Calibration	-		0.0358	-0.05634
358	3.934	13342.9	0	?	0	535	Calibration	-		0.0359	-0.05634
359	3.945	13386.1	0	?	0	535	Calibration	-		0.036	-0.05631
360	3.956	13311.6	0	?	0	535	Calibration	-		0.0361	-0.05633
361	3.9669	13471.2	0	?	0	535	Calibration	-		0.0362	-0.05632
362	3.9779	13402.9	0	?	0	535	Calibration	-		0.0363	-0.05632
363	3.9888	13363	0	?	0	535	Calibration	-		0.0364	-0.0563
364	3.9998	13353.7	0	?	0	535	Calibration	-		0.0365	-0.05629
365	4.0108	13393.2	0	?	0	535	Calibration	-		0.0366	-0.0563
366	4.0217	13405.7	0	?	0	535	Calibration	-		0.0367	-0.0563
367	4.0327	13418.1	0	?	0	535	Calibration	-		0.0368	-0.05629
368	4.0436	13425.3	0	?	0	535	Calibration	-		0.0369	-0.0563
369	4.0546	13377.2	0	?	0	535	Calibration	-		0.037	-0.05632
370	4.0655	13318.1	0	?	0	535	Calibration	-		0.0371	-0.05633
371	4.0765	13478.6	0	?	0	535	Calibration	-		0.0372	-0.05631
372	4.0875	13388.4	0	?	0	535	Calibration	-		0.0373	-0.05633
373	4.0984	13322.8	0	?	0	535	Calibration	-		0.0374	-0.05635
374	4.1094	13379.8	0	?	0	535	Calibration	-		0.0375	-0.05636
375	4.1203	13341.8	0	?	0	535	Calibration	-		0.0376	-0.05638
376	4.1313	13421.8	0	?	0	535	Calibration	-		0.0377	-0.05635
377	4.1422	13430.4	0	?	0	535	Calibration	-		0.0378	-0.05632
378	4.1532	13370.6	0	?	0	535	Calibration	-		0.0379	-0.05632
379	4.1642	13394.2	0	?	0	535	Calibration	-		0.038	-0.0563
380	4.1751	13327.5	0	?	0	535	Calibration	-		0.0381	-0.0563
381	4.1861	13295.8	0	?	0	535	Calibration	-		0.0382	-0.0563
382	4.197	13361.9	0	?	0	535	Calibration	-		0.0383	-0.0563
383	4.208	13481.3	0	?	0	535	Calibration	-		0.0384	-0.05629
384	4.219	13326.3	0	?	0	535	Calibration	-		0.0385	-0.05629
385	4.2299	13372.6	0	?	0	535	Calibration	-		0.0386	-0.05627
386	4.2409	13414.1	0	?	0	535	Calibration	-		0.0387	-0.05629
387	4.2518	13376	0	?	0	535	Calibration	-		0.0388	-0.05629
388	4.2628	13474.5	0	?	0	535	Calibration	-		0.0389	-0.05627
389	4.2737	13336.4	0	?	0	535	Calibration	-		0.039	-0.05626
390	4.2847	13389.3	0	?	0	535	Calibration	-		0.0391	-0.05625
391	4.2957	13455.1	0	?	0	535	Calibration	-		0.0392	-0.05625
392	4.3066	13370.5	0	?	0	535	Calibration	-		0.0393	-0.05626
393	4.3176	13430.5	0	?	0	535	Calibration	-		0.0394	-0.05626
394	4.3285	13336	0	?	0	535	Calibration	-		0.0395	-0.05626
395	4.3395	13322.4	0	?	0	535	Calibration	-		0.0396	-0.05624
396	4.3505	13319.5	0	?	0	535	Calibration	-		0.0397	-0.05623
397	4.3614	13330.2	0	?	0	535	Calibration	-		0.0398	-0.05621
398	4.3724	13401	0	?	0	535	Calibration	-		0.0399	-0.05622
399	4.3833	13326.4	0	?	0	535	Calibration	-		0.04	-0.05621
400	4.3943	13463.1	0	?	0	535	Calibration	-		0.0401	-0.05618
401	4.4052	13337.6	0	?	0	535	Calibration	-		0.0402	-0.0562
402	4.4162	13342.9	0	?	0	535	Calibration	-		0.0403	-0.05618
403	4.4272	13392.6	0	?	0	535	Calibration	-		0.0404	-0.05619
404	4.4381	13354.1	0	?	0	535	Calibration	-		0.0405	-0.0562
405	4.4491	13308.3	0	?	0	535	Calibration	-		0.0406	-0.05619
406	4.46	13425.8	0	?	0	535	Calibration	-		0.0407	-0.05619
407	4.471	13324.2	0	?	0	535	Calibration	-		0.0408	-0.05617
408	4.482	13323.4	0	?	0	535	Calibration	-		0.0409	-0.05618
409	4.4929	13270.2	0	?	0	535	Calibration	-		0.041	-0.05616
410	4.5039	13328.1	0	?	0	535	Calibration	-		0.0411	-0.05615
411	4.5148	13318	0	?	0	535	Calibration	-		0.0412	-0.05615
412	4.5258	13421.8	0	?	0	535	Calibration	-		0.0413	-0.05617
413	4.5367	13436.6	0	?	0	535	Calibration	-		0.0414	-0.05616
414	4.5477	13408.7	0	?	0	535	Calibration	-		0.0415	-0.05615
415	4.5587	13285	0	?	0	535	Calibration	-		0.0416	-0.05615
416	4.5696	13409.9	0	?	0	535	Calibration	-		0.0417	-0.05614
417	4.5806	13397.7	0	?	0	535	Calibration	-		0.0418	-0.05612
418	4.5915	13429.2	0	?	0	535	Calibration	-		0.0419	-0.05612
419	4.6025	13357.8	0	?	0	535	Calibration	-		0.042	-0.0561
420	4.6135	13372.2	0	?	0	535	Calibration	-		0.0421	-0.05609
421	4.6244	13342.9	0	?	0	535	Calibration	-		0.0422	-0.05609
422	4.6354	13388.8	0	?	0	535	Calibration	-		0.0423	-0.0561
423	4.6463	13336.7	0	?	0	535	Calibration	-		0.0424	-0.05612
424	4.6573	13423.3	0	?	0	535	Calibration	-		0.0425	-0.05613
425	4.6682	13310	0	?	0	535	Calibration	-		0.0426	-0.05614
426	4.6792	13345.3	0	?	0	535	Calibration	-		0.0427	-0.05613
427	4.6902	13269.2	0	?	0	535	Calibration	-		0.0428	-0.05612
428	4.7011	13310.9	0	?	0	535	Calibration	-		0.0429	-0.05612
429	4.7121	13340.7	0	?	0	535	Calibration	-		0.043	-0.05613
430	4.723	13350.7	0	?	0	535	Calibration	-		0.0431	-0.05612
431	4.734	13262.5	0	?	0	535	Calibration	-		0.0432	-0.05614
432	4.745	13277.1	0	?	0	535	Calibration	-		0.0433	-0.05613
433	4.7559	13441.1	0	?	0	535	Calibration	-		0.0434	-0.05612
434	4.7669	13287.7	0	?	0	535	Calibration	-		0.0435	-0.05613
435	4.7778	13342.5	0	?	0	535	Calibration	-		0.0436	-0.05614
436	4.7888	13343.4	0	?	0	535	Calibration	-		0.0437	-0.05615
437	4.7997	13311.8	0	?	0	535	Calibration	-		0.0438	-0.05613
438	4.8107	13354	0	?	0	535	Calibration	-		0.0439	-0.05614
439	4.8217	13318.2	0	?	0	535	Calibration	-		0.044	-0.05612
440	4.8326	13326.3	0	?	0	535	Calibration	-		0.0441	-0.05612
441	4.8436	13335.6	0	?	0	535	Calibration	-		0.0442	-0.05613
442	4.8545	13277.2	0	?	0	535	Calibration	-		0.0443	-0.05613
443	4.8655	13252.2	0	?	0	535	Calibration	-		0.0444	-0.05612
444	4.8765	13321.3	0	?	0	535	Calibration	-		0.0445	-0.05613
445	4.8874	13258	0	?	0	535	Calibration	-		0.0446	-0.05612
446	4.8984	13285.6	0	?	0	535	Calibration	-		0.0447	-0.05612
447	4.9093	13354.6	0	?	0	535	Calibration	-		0.0448	-0.05613
448	4.9203	13409.4	0	?	0	535	Calibration	-		0.0449	-0.05613
449	4.9312	13291.1	0	?	0	535	Calibration	-		0.045	-0.05612
[truncated: 247,550+ more rows]

## Sheet: Figure 5G
cal. → step 1	step 1 → step 2	step 1 → step 3
[truncated: 11 more rows]

[truncated: 1 more sheets: Figure 5H]
