# Supplementary material for: All-optical closed-loop voltage clamp for precise control of muscles and neurons in live animals
Source: Research Square preprint supplement (doi:10.21203/rs.3.rs-1505565/v1), 2023-03-29
Supplement: Supplementary file 8 [file 794b9889bcc1a353b235b062.xlsx]

## Sheet: ED Figure 8B
Title: 1 Date: 2022/07/27 13:35									Title: 2 Date: 2022/07/27 13:41									Title: 3 Date: 2022/07/27 13:48									Title: 4 Date: 2022/07/27 13:49									Title: 5 Date: 2022/07/27 13:54									Title: 6 Date: 2022/07/27 13:59
Parameters: Clamp from: 5.0 % to: -5.0 %. Tolerance range: +/-0.5 % Exposure time: 10 ms Binning: 4x4									Parameters: Clamp from: 5.0 % to: -5.0 %. Tolerance range: +/-0.5 % Exposure time: 10 ms Binning: 4x4									Parameters: Clamp from: 5.0 % to: -5.0 %. Tolerance range: +/-0.5 % Exposure time: 10 ms Binning: 4x4									Parameters: Clamp from: 5.0 % to: -5.0 %. Tolerance range: +/-0.5 % Exposure time: 10 ms Binning: 4x4									Parameters: Clamp from: 5.0 % to: -5.0 %. Tolerance range: +/-0.5 % Exposure time: 10 ms Binning: 4x4									Parameters: Clamp from: 5.0 % to: -5.0 %. Tolerance range: +/-0.5 % Exposure time: 10 ms Binning: 4x4
Bleaching correction function: exp. offset = -5024.86 * exp(--0.0002 * x) + 16849.43 R^2: 0.8008 Video duration: 22.74 s Framerate: 99.84									Bleaching correction function: exp. offset = -155.86 * exp(--0.0012 * x) + 20474.91 R^2: 0.8980 Video duration: 22.74 s Framerate: 99.82									Bleaching correction function: exp. offset = 824.14 * exp(-0.0016 * x) + 6925.96 R^2: 0.9817 Video duration: 22.74 s Framerate: 99.84									Bleaching correction function: exp. offset = 1446.51 * exp(-0.0019 * x) + 6848.76 R^2: 0.9889 Video duration: 22.74 s Framerate: 99.84									Bleaching correction function: exp. offset = 935.26 * exp(-0.0011 * x) + 5422.70 R^2: 0.9703 Video duration: 22.74 s Framerate: 99.83									Bleaching correction function: exp. offset = 497.45 * exp(-0.0020 * x) + 4986.53 R^2: 0.9278 Video duration: 22.74 s Framerate: 99.84
Clamp value (%)	Pseudo V (%)	Pseudo I (nm)							Clamp value (%)	Pseudo V (%)	Pseudo I (nm)							Clamp value (%)	Pseudo V (%)	Pseudo I (nm)							Clamp value (%)	Pseudo V (%)	Pseudo I (nm)							Clamp value (%)	Pseudo V (%)	Pseudo I (nm)							Clamp value (%)	Pseudo V (%)	Pseudo I (nm)
5	0.51	530							5	6.38	534.2							5	5.23	539							5	4.43	556.7							5	6.73	538.2							5	4.82	539.2
4	1.48	520.7							4	3.16	525							4	3.85	535							4	3.96	557							4	3.66	534							4	3.68	534
3	-0.61	529.3							3	2.21	522							3	3.28	533							3	3.41	551							3	3.16	532							3	2.91	533
2	2.45	539.8							2	1.37	519.9							2	1.79	530							2	1.98	540							2	1.65	530.7							2	1.65	530
1	1.9	531.4							1	0.65	518							1	1.27	528							1	1.18	536							1	1.2	529							1	1.54	530
0	-0.24	529							0	-0.01	516							0	-0.19	525							0	-0.32	531							0	-0.72	526.8							0	-0.47	527.3
-1	-2.18	523.4							-1	-0.77	511							-1	-1.08	522							-1	-0.66	529							-1	-0.7	526							-1	-0.79	526
-2	-4.09	509.4							-2	-1.78	505							-2	-2.57	517							-2	-2.45	523							-2	-2.14	523							-2	-1.82	524
-3	-3.63	500.5							-3	-2.33	499							-3	-2.39	516.9							-3	-2.43	523							-3	-3.07	520							-3	-2.49	522
-4	-3.91	495							-4	-3.05	481.3							-4	-3.69	511							-4	-3.77	518							-4	-3.77	517							-4	-4.3	517
-5	-4.18	486.22							-5	-5.01	467							-5	-4.39	505							-5	-4.77	513							-5	-4.55	513							-5	-4.51	516
# Measurement	Time	F	F_bleach_correct	dF/F0	dF/F0_bleach_correct	Wavelength	Info	Step	# Measurement	Time	F	F_bleach_correct	dF/F0	dF/F0_bleach_correct	Wavelength	Info	Step	# Measurement	Time	F	F_bleach_correct	dF/F0	dF/F0_bleach_correct	Wavelength	Info	Step	# Measurement	Time	F	F_bleach_correct	dF/F0	dF/F0_bleach_correct	Wavelength	Info	Step	# Measurement	Time	F	F_bleach_correct	dF/F0	dF/F0_bleach_correct	Wavelength	Info	Step	# Measurement	Time	F	F_bleach_correct	dF/F0
0	0.01	12143.5	0	?	0	525	Calibration	-	0	0.01	22450.4	0	?	0	525	Calibration	-	0	0.01	8472.16	0	?	0	525	Calibration	-	0	0.01	8915.23	0	?	0	525	Calibration	-	0	0.01	7268.75	0	?	0	525	Calibration	-	0	0.01	6144.16	0	?
1	0.02	12030.7	0	?	0	525	Calibration	-	1	0.02	22415.4	0	?	0	525	Calibration	-	1	0.02	8480.1	0	?	0	525	Calibration	-	1	0.02	8921.52	0	?	0	525	Calibration	-	1	0.02	7211.47	0	?	0	525	Calibration	-	1	0.02	6193.03	0	?
2	0.03	11936	0	?	0	525	Calibration	-	2	0.0301	22458.7	0	?	0	525	Calibration	-	2	0.03	8470.42	0	?	0	525	Calibration	-	2	0.03	8955.21	0	?	0	525	Calibration	-	2	0.0301	7132.72	0	?	0	525	Calibration	-	2	0.03	6216.38	0	?
3	0.0401	11854.2	0	?	0	525	Calibration	-	3	0.0401	22601.9	0	?	0	525	Calibration	-	3	0.0401	8465.2	0	?	0	525	Calibration	-	3	0.0401	8946.03	0	?	0	525	Calibration	-	3	0.0401	7083.97	0	?	0	525	Calibration	-	3	0.0401	6144.15	0	?
4	0.0501	11657.2	0	?	0	525	Calibration	-	4	0.0501	22247.5	0	?	0	525	Calibration	-	4	0.0501	8123.17	0	?	0	525	Calibration	-	4	0.0501	8704.43	0	?	0	525	Calibration	-	4	0.0501	6877.33	0	?	0	525	Calibration	-	4	0.0501	5961.89	0	?
5	0.0601	11433.1	0	?	0	525	Calibration	-	5	0.0601	21675.4	0	?	0	525	Calibration	-	5	0.0601	7897.83	0	?	0	525	Calibration	-	5	0.0601	8505.61	0	?	0	525	Calibration	-	5	0.0601	6719.83	0	?	0	525	Calibration	-	5	0.0601	5808.06	0	?
6	0.0701	11249.7	0	?	0	525	Calibration	-	6	0.0701	21357.6	0	?	0	525	Calibration	-	6	0.0701	7823.71	0	?	0	525	Calibration	-	6	0.0701	8471.97	0	?	0	525	Calibration	-	6	0.0701	6631.74	0	?	0	525	Calibration	-	6	0.0701	5704.2	0	?
7	0.0801	11267.9	0	?	0	525	Calibration	-	7	0.0801	21140.4	0	?	0	525	Calibration	-	7	0.0801	7788.56	0	?	0	525	Calibration	-	7	0.0801	8448.6	0	?	0	525	Calibration	-	7	0.0801	6563.43	0	?	0	525	Calibration	-	7	0.0801	5646.33	0	?
8	0.0901	11203.8	0	?	0	525	Calibration	-	8	0.0902	21094.1	0	?	0	525	Calibration	-	8	0.0901	7756.29	0	?	0	525	Calibration	-	8	0.0901	8454.56	0	?	0	525	Calibration	-	8	0.0902	6516.88	0	?	0	525	Calibration	-	8	0.0901	5624.62	0	?
9	0.1002	11160.4	0	?	0	525	Calibration	-	9	0.1002	21016.3	0	?	0	525	Calibration	-	9	0.1002	7739.88	0	?	0	525	Calibration	-	9	0.1002	8383.9	0	?	0	525	Calibration	-	9	0.1002	6512.96	0	?	0	525	Calibration	-	9	0.1002	5589.74	0	?
10	0.1102	11119	0	?	0	525	Calibration	-	10	0.1102	20921.4	0	?	0	525	Calibration	-	10	0.1102	7733.23	0	?	0	525	Calibration	-	10	0.1102	8388.94	0	?	0	525	Calibration	-	10	0.1102	6508.89	0	?	0	525	Calibration	-	10	0.1102	5577.87	0	?
11	0.1202	11157.4	0	?	0	525	Calibration	-	11	0.1202	20829.3	0	?	0	525	Calibration	-	11	0.1202	7713.9	0	?	0	525	Calibration	-	11	0.1202	8343.7	0	?	0	525	Calibration	-	11	0.1202	6501.3	0	?	0	525	Calibration	-	11	0.1202	5563.67	0	?
12	0.1302	11182.1	0	?	0	525	Calibration	-	12	0.1302	20817.5	0	?	0	525	Calibration	-	12	0.1302	7714.26	0	?	0	525	Calibration	-	12	0.1302	8286.74	0	?	0	525	Calibration	-	12	0.1302	6484.26	0	?	0	525	Calibration	-	12	0.1302	5557.03	0	?
13	0.1402	11183.1	0	?	0	525	Calibration	-	13	0.1402	20809	0	?	0	525	Calibration	-	13	0.1402	7712.46	0	?	0	525	Calibration	-	13	0.1402	8229.68	0	?	0	525	Calibration	-	13	0.1402	6477.43	0	?	0	525	Calibration	-	13	0.1402	5570.89	0	?
14	0.1502	11209.8	0	?	0	525	Calibration	-	14	0.1503	20786.2	0	?	0	525	Calibration	-	14	0.1502	7702.67	0	?	0	525	Calibration	-	14	0.1502	8241	0	?	0	525	Calibration	-	14	0.1503	6464.51	0	?	0	525	Calibration	-	14	0.1502	5559.66	0	?
15	0.1603	11269.4	0	?	0	525	Calibration	-	15	0.1603	20718.5	0	?	0	525	Calibration	-	15	0.1603	7718.21	0	?	0	525	Calibration	-	15	0.1603	8244.84	0	?	0	525	Calibration	-	15	0.1603	6468.87	0	?	0	525	Calibration	-	15	0.1603	5561.71	0	?
16	0.1703	11315.2	0	?	0	525	Calibration	-	16	0.1703	20703.9	0	?	0	525	Calibration	-	16	0.1703	7699.95	0	?	0	525	Calibration	-	16	0.1703	8243.54	0	?	0	525	Calibration	-	16	0.1703	6463.72	0	?	0	525	Calibration	-	16	0.1703	5526.42	0	?
17	0.1803	11313.2	0	?	0	525	Calibration	-	17	0.1803	20653.6	0	?	0	525	Calibration	-	17	0.1803	7699.4	0	?	0	525	Calibration	-	17	0.1803	8308.52	0	?	0	525	Calibration	-	17	0.1803	6433.92	0	?	0	525	Calibration	-	17	0.1803	5521.12	0	?
18	0.1903	11306.9	0	?	0	525	Calibration	-	18	0.1903	20682.8	0	?	0	525	Calibration	-	18	0.1903	7697.92	0	?	0	525	Calibration	-	18	0.1903	8375.27	0	?	0	525	Calibration	-	18	0.1903	6423.71	0	?	0	525	Calibration	-	18	0.1903	5525.7	0	?
19	0.2003	11339.2	0	?	0	525	Calibration	-	19	0.2004	20677.5	0	?	0	525	Calibration	-	19	0.2003	7699.07	0	?	0	525	Calibration	-	19	0.2003	8373.01	0	?	0	525	Calibration	-	19	0.2003	6416.43	0	?	0	525	Calibration	-	19	0.2003	5513.38	0	?
20	0.2103	11358.1	0	?	0	525	Calibration	-	20	0.2104	20700.6	0	?	0	525	Calibration	-	20	0.2103	7711.15	0	?	0	525	Calibration	-	20	0.2103	8275.74	0	?	0	525	Calibration	-	20	0.2104	6407.84	0	?	0	525	Calibration	-	20	0.2103	5508.67	0	?
21	0.2204	11368.9	0	?	0	525	Calibration	-	21	0.2204	20651.8	0	?	0	525	Calibration	-	21	0.2203	7702.86	0	?	0	525	Calibration	-	21	0.2203	8235.06	0	?	0	525	Calibration	-	21	0.2204	6397.57	0	?	0	525	Calibration	-	21	0.2203	5515.84	0	?
22	0.2304	11408.2	0	?	0	525	Calibration	-	22	0.2304	20662.4	0	?	0	525	Calibration	-	22	0.2304	7709.47	0	?	0	525	Calibration	-	22	0.2304	8225.76	0	?	0	525	Calibration	-	22	0.2304	6409	0	?	0	525	Calibration	-	22	0.2304	5512.83	0	?
23	0.2404	11503.7	0	?	0	525	Calibration	-	23	0.2404	20658.5	0	?	0	525	Calibration	-	23	0.2404	7700.56	0	?	0	525	Calibration	-	23	0.2404	8190.56	0	?	0	525	Calibration	-	23	0.2404	6400.86	0	?	0	525	Calibration	-	23	0.2404	5526.93	0	?
24	0.2504	11593.3	0	?	0	525	Calibration	-	24	0.2504	20599.7	0	?	0	525	Calibration	-	24	0.2504	7700.99	0	?	0	525	Calibration	-	24	0.2504	8197.19	0	?	0	525	Calibration	-	24	0.2504	6378.32	0	?	0	525	Calibration	-	24	0.2504	5514.37	0	?
25	0.2604	11570.2	0	?	0	525	Calibration	-	25	0.2605	20580.8	0	?	0	525	Calibration	-	25	0.2604	7716.99	0	?	0	525	Calibration	-	25	0.2604	8170.01	0	?	0	525	Calibration	-	25	0.2604	6394.61	0	?	0	525	Calibration	-	25	0.2604	5500.16	0	?
26	0.2704	11658.7	0	?	0	525	Calibration	-	26	0.2705	20574.1	0	?	0	525	Calibration	-	26	0.2704	7710.05	0	?	0	525	Calibration	-	26	0.2704	8234.76	0	?	0	525	Calibration	-	26	0.2705	6395.22	0	?	0	525	Calibration	-	26	0.2704	5500.96	0	?
27	0.2805	11769.6	0	?	0	525	Calibration	-	27	0.2805	20470.2	0	?	0	525	Calibration	-	27	0.2804	7703.32	0	?	0	525	Calibration	-	27	0.2804	8296.57	0	?	0	525	Calibration	-	27	0.2805	6399.09	0	?	0	525	Calibration	-	27	0.2804	5484.18	0	?
28	0.2905	11787.3	0	?	0	525	Calibration	-	28	0.2905	20483.3	0	?	0	525	Calibration	-	28	0.2905	7708.77	0	?	0	525	Calibration	-	28	0.2905	8294.15	0	?	0	525	Calibration	-	28	0.2905	6382.13	0	?	0	525	Calibration	-	28	0.2905	5500.19	0	?
29	0.3005	11807.8	0	?	0	525	Calibration	-	29	0.3005	20406.3	0	?	0	525	Calibration	-	29	0.3005	7706.1	0	?	0	525	Calibration	-	29	0.3005	8279.77	0	?	0	525	Calibration	-	29	0.3005	6381.88	0	?	0	525	Calibration	-	29	0.3005	5499.33	0	?
30	0.3105	11835.4	0	?	0	525	Calibration	-	30	0.3105	20442.4	0	?	0	525	Calibration	-	30	0.3105	7706.18	0	?	0	525	Calibration	-	30	0.3105	8254.27	0	?	0	525	Calibration	-	30	0.3105	6352.75	0	?	0	525	Calibration	-	30	0.3105	5472.82	0	?
31	0.3205	11834.7	0	?	0	525	Calibration	-	31	0.3206	20398.2	0	?	0	525	Calibration	-	31	0.3205	7713.2	0	?	0	525	Calibration	-	31	0.3205	8251.79	0	?	0	525	Calibration	-	31	0.3205	6373.19	0	?	0	525	Calibration	-	31	0.3205	5468.88	0	?
32	0.3305	11855.1	0	?	0	525	Calibration	-	32	0.3306	20340.5	0	?	0	525	Calibration	-	32	0.3305	7708.2	0	?	0	525	Calibration	-	32	0.3305	8215	0	?	0	525	Calibration	-	32	0.3306	6350.3	0	?	0	525	Calibration	-	32	0.3305	5459.98	0	?
33	0.3406	11838.6	0	?	0	525	Calibration	-	33	0.3406	20377	0	?	0	525	Calibration	-	33	0.3405	7705.26	0	?	0	525	Calibration	-	33	0.3405	8214.21	0	?	0	525	Calibration	-	33	0.3406	6357.73	0	?	0	525	Calibration	-	33	0.3405	5460.14	0	?
34	0.3506	11853.8	0	?	0	525	Calibration	-	34	0.3506	20315	0	?	0	525	Calibration	-	34	0.3506	7717.87	0	?	0	525	Calibration	-	34	0.3506	8168.27	0	?	0	525	Calibration	-	34	0.3506	6353.13	0	?	0	525	Calibration	-	34	0.3506	5458.44	0	?
35	0.3606	11831.9	0	?	0	525	Calibration	-	35	0.3606	20316.8	0	?	0	525	Calibration	-	35	0.3606	7700.03	0	?	0	525	Calibration	-	35	0.3606	8180.51	0	?	0	525	Calibration	-	35	0.3606	6310.2	0	?	0	525	Calibration	-	35	0.3606	5467.2	0	?
36	0.3706	11794.4	0	?	0	525	Calibration	-	36	0.3707	20328.6	0	?	0	525	Calibration	-	36	0.3706	7691.62	0	?	0	525	Calibration	-	36	0.3706	8226.46	0	?	0	525	Calibration	-	36	0.3706	6322.16	0	?	0	525	Calibration	-	36	0.3706	5448.99	0	?
37	0.3806	11777.2	0	?	0	525	Calibration	-	37	0.3807	20378.9	0	?	0	525	Calibration	-	37	0.3806	7692.12	0	?	0	525	Calibration	-	37	0.3806	8268.93	0	?	0	525	Calibration	-	37	0.3807	6337.79	0	?	0	525	Calibration	-	37	0.3806	5438.83	0	?
38	0.3906	11805.2	0	?	0	525	Calibration	-	38	0.3907	20342.7	0	?	0	525	Calibration	-	38	0.3906	7700.69	0	?	0	525	Calibration	-	38	0.3906	8345.6	0	?	0	525	Calibration	-	38	0.3907	6317.24	0	?	0	525	Calibration	-	38	0.3906	5459.28	0	?
39	0.4007	11833.4	0	?	0	525	Calibration	-	39	0.4007	20269.8	0	?	0	525	Calibration	-	39	0.4006	7698.54	0	?	0	525	Calibration	-	39	0.4006	8279.57	0	?	0	525	Calibration	-	39	0.4007	6332.07	0	?	0	525	Calibration	-	39	0.4006	5424.13	0	?
40	0.4107	11905.1	0	?	0	525	Calibration	-	40	0.4107	20261.2	0	?	0	525	Calibration	-	40	0.4107	7686.76	0	?	0	525	Calibration	-	40	0.4107	8269.07	0	?	0	525	Calibration	-	40	0.4107	6300.39	0	?	0	525	Calibration	-	40	0.4107	5440.2	0	?
41	0.4207	11904	0	?	0	525	Calibration	-	41	0.4207	20230	0	?	0	525	Calibration	-	41	0.4207	7682.57	0	?	0	525	Calibration	-	41	0.4207	8281.05	0	?	0	525	Calibration	-	41	0.4207	6303.01	0	?	0	525	Calibration	-	41	0.4207	5441.15	0	?
42	0.4307	11900	0	?	0	525	Calibration	-	42	0.4308	20194.3	0	?	0	525	Calibration	-	42	0.4307	7697.47	0	?	0	525	Calibration	-	42	0.4307	8258.62	0	?	0	525	Calibration	-	42	0.4307	6332.72	0	?	0	525	Calibration	-	42	0.4307	5439.07	0	?
43	0.4407	11866.1	0	?	0	525	Calibration	-	43	0.4408	20162.8	0	?	0	525	Calibration	-	43	0.4407	7697.79	0	?	0	525	Calibration	-	43	0.4407	8235.4	0	?	0	525	Calibration	-	43	0.4408	6305.2	0	?	0	525	Calibration	-	43	0.4407	5456.12	0	?
44	0.4507	11777.2	0	?	0	525	Calibration	-	44	0.4508	20111.2	0	?	0	525	Calibration	-	44	0.4507	7695.23	0	?	0	525	Calibration	-	44	0.4507	8286.1	0	?	0	525	Calibration	-	44	0.4508	6298.87	0	?	0	525	Calibration	-	44	0.4507	5435.36	0	?
45	0.4607	11708.8	0	?	0	525	Calibration	-	45	0.4608	20121.2	0	?	0	525	Calibration	-	45	0.4607	7687.67	0	?	0	525	Calibration	-	45	0.4607	8274.11	0	?	0	525	Calibration	-	45	0.4608	6281.45	0	?	0	525	Calibration	-	45	0.4607	5420.04	0	?
46	0.4708	11681.9	0	?	0	525	Calibration	-	46	0.4708	20140.1	0	?	0	525	Calibration	-	46	0.4707	7694.37	0	?	0	525	Calibration	-	46	0.4707	8243.52	0	?	0	525	Calibration	-	46	0.4708	6282.39	0	?	0	525	Calibration	-	46	0.4707	5417.48	0	?
47	0.4808	11712	0	?	0	525	Calibration	-	47	0.4808	20151.2	0	?	0	525	Calibration	-	47	0.4808	7699.87	0	?	0	525	Calibration	-	47	0.4808	8209.26	0	?	0	525	Calibration	-	47	0.4808	6303.86	0	?	0	525	Calibration	-	47	0.4808	5415.73	0	?
48	0.4908	11718.8	0	?	0	525	Calibration	-	48	0.4909	20101.1	0	?	0	525	Calibration	-	48	0.4908	7682.99	0	?	0	525	Calibration	-	48	0.4908	8173.82	0	?	0	525	Calibration	-	48	0.4908	6304.46	0	?	0	525	Calibration	-	48	0.4908	5403.04	0	?
49	0.5008	11761.4	0	?	0	525	Calibration	-	49	0.5009	20116.3	0	?	0	525	Calibration	-	49	0.5008	7700.09	0	?	0	525	Calibration	-	49	0.5008	8153.04	0	?	0	525	Calibration	-	49	0.5009	6320.68	0	?	0	525	Calibration	-	49	0.5008	5396.37	0	?
50	0.5108	11775.2	0	?	0	525	Calibration	-	50	0.5109	20105.8	0	?	0	525	Calibration	-	50	0.5108	7700.73	0	?	0	525	Calibration	-	50	0.5108	8156.13	0	?	0	525	Calibration	-	50	0.5109	6305.12	0	?	0	525	Calibration	-	50	0.5108	5412.52	0	?
51	0.5208	11772.9	0	?	0	525	Calibration	-	51	0.5209	20094.9	0	?	0	525	Calibration	-	51	0.5208	7700.5	0	?	0	525	Calibration	-	51	0.5208	8150.79	0	?	0	525	Calibration	-	51	0.5209	6304.98	0	?	0	525	Calibration	-	51	0.5208	5408.37	0	?
52	0.5309	11696.1	0	?	0	525	Calibration	-	52	0.5309	20083	0	?	0	525	Calibration	-	52	0.5308	7703.19	0	?	0	525	Calibration	-	52	0.5308	8159.73	0	?	0	525	Calibration	-	52	0.5309	6301.69	0	?	0	525	Calibration	-	52	0.5308	5414.5	0	?
53	0.5409	11717.7	0	?	0	525	Calibration	-	53	0.541	20070.8	0	?	0	525	Calibration	-	53	0.5409	7701.9	0	?	0	525	Calibration	-	53	0.5409	8183.62	0	?	0	525	Calibration	-	53	0.5409	6317.81	0	?	0	525	Calibration	-	53	0.5409	5427.64	0	?
54	0.5509	11731.1	0	?	0	525	Calibration	-	54	0.551	20075.5	0	?	0	525	Calibration	-	54	0.5509	7689.08	0	?	0	525	Calibration	-	54	0.5509	8190.9	0	?	0	525	Calibration	-	54	0.5509	6316.97	0	?	0	525	Calibration	-	54	0.5509	5408.31	0	?
55	0.5609	11730.4	0	?	0	525	Calibration	-	55	0.561	20076.6	0	?	0	525	Calibration	-	55	0.5609	7681.72	0	?	0	525	Calibration	-	55	0.5609	8172.08	0	?	0	525	Calibration	-	55	0.561	6310.33	0	?	0	525	Calibration	-	55	0.5609	5415.59	0	?
56	0.5709	11632.4	0	?	0	525	Calibration	-	56	0.571	20041.8	0	?	0	525	Calibration	-	56	0.5709	7671.75	0	?	0	525	Calibration	-	56	0.5709	8179.76	0	?	0	525	Calibration	-	56	0.571	6289.49	0	?	0	525	Calibration	-	56	0.5709	5395.72	0	?
57	0.5809	11654.6	0	?	0	525	Calibration	-	57	0.581	20054.9	0	?	0	525	Calibration	-	57	0.5809	7660.58	0	?	0	525	Calibration	-	57	0.5809	8162.51	0	?	0	525	Calibration	-	57	0.581	6302.58	0	?	0	525	Calibration	-	57	0.5809	5398.08	0	?
58	0.591	11732.9	0	?	0	525	Calibration	-	58	0.591	20097	0	?	0	525	Calibration	-	58	0.5909	7655.86	0	?	0	525	Calibration	-	58	0.5909	8155.06	0	?	0	525	Calibration	-	58	0.591	6301.58	0	?	0	525	Calibration	-	58	0.5909	5387.37	0	?
59	0.601	11759.1	0	?	0	525	Calibration	-	59	0.6011	20097.2	0	?	0	525	Calibration	-	59	0.601	7668.03	0	?	0	525	Calibration	-	59	0.601	8143.77	0	?	0	525	Calibration	-	59	0.601	6290.72	0	?	0	525	Calibration	-	59	0.601	5398.1	0	?
60	0.611	11775.9	0	?	0	525	Calibration	-	60	0.6111	20112.4	0	?	0	525	Calibration	-	60	0.611	7652.98	0	?	0	525	Calibration	-	60	0.611	8153.33	0	?	0	525	Calibration	-	60	0.611	6318.01	0	?	0	525	Calibration	-	60	0.611	5395.6	0	?
61	0.621	11821.7	0	?	0	525	Calibration	-	61	0.6211	20138.7	0	?	0	525	Calibration	-	61	0.621	7663.55	0	?	0	525	Calibration	-	61	0.621	8134.8	0	?	0	525	Calibration	-	61	0.6211	6311.63	0	?	0	525	Calibration	-	61	0.621	5392.41	0	?
62	0.631	11861.2	0	?	0	525	Calibration	-	62	0.6311	20185.1	0	?	0	525	Calibration	-	62	0.631	7644.43	0	?	0	525	Calibration	-	62	0.631	8129.34	0	?	0	525	Calibration	-	62	0.6311	6309.47	0	?	0	525	Calibration	-	62	0.631	5388.98	0	?
63	0.641	11792.3	0	?	0	525	Calibration	-	63	0.6411	20180.5	0	?	0	525	Calibration	-	63	0.641	7656.53	0	?	0	525	Calibration	-	63	0.641	8140.2	0	?	0	525	Calibration	-	63	0.6411	6279.47	0	?	0	525	Calibration	-	63	0.641	5411.36	0	?
64	0.6511	11761.2	0	?	0	525	Calibration	-	64	0.6511	20129.1	0	?	0	525	Calibration	-	64	0.651	7675.88	0	?	0	525	Calibration	-	64	0.651	8150.09	0	?	0	525	Calibration	-	64	0.6511	6286.42	0	?	0	525	Calibration	-	64	0.651	5390.01	0	?
65	0.6611	11757.7	0	?	0	525	Calibration	-	65	0.6612	20119.5	0	?	0	525	Calibration	-	65	0.661	7653.48	0	?	0	525	Calibration	-	65	0.661	8151.56	0	?	0	525	Calibration	-	65	0.6611	6271.63	0	?	0	525	Calibration	-	65	0.661	5390.58	0	?
66	0.6711	11638.4	0	?	0	525	Calibration	-	66	0.6712	20081.6	0	?	0	525	Calibration	-	66	0.6711	7646.34	0	?	0	525	Calibration	-	66	0.6711	8155.02	0	?	0	525	Calibration	-	66	0.6712	6266.45	0	?	0	525	Calibration	-	66	0.6711	5382.58	0	?
67	0.6811	11510.2	0	?	0	525	Calibration	-	67	0.6812	20095.7	0	?	0	525	Calibration	-	67	0.6811	7636.86	0	?	0	525	Calibration	-	67	0.6811	8151.88	0	?	0	525	Calibration	-	67	0.6812	6247.56	0	?	0	525	Calibration	-	67	0.6811	5403.24	0	?
68	0.6911	11576.9	0	?	0	525	Calibration	-	68	0.6912	20080.9	0	?	0	525	Calibration	-	68	0.6911	7631.42	0	?	0	525	Calibration	-	68	0.6911	8107.13	0	?	0	525	Calibration	-	68	0.6912	6244.54	0	?	0	525	Calibration	-	68	0.6911	5386.23	0	?
69	0.7011	11617.4	0	?	0	525	Calibration	-	69	0.7012	20099.5	0	?	0	525	Calibration	-	69	0.7011	7641.92	0	?	0	525	Calibration	-	69	0.7011	8085.21	0	?	0	525	Calibration	-	69	0.7012	6266.62	0	?	0	525	Calibration	-	69	0.7011	5386.81	0	?
70	0.7112	11705	0	?	0	525	Calibration	-	70	0.7113	20101.6	0	?	0	525	Calibration	-	70	0.7111	7644.99	0	?	0	525	Calibration	-	70	0.7111	8068.11	0	?	0	525	Calibration	-	70	0.7112	6251.62	0	?	0	525	Calibration	-	70	0.7111	5402.97	0	?
71	0.7212	11813.3	0	?	0	525	Calibration	-	71	0.7213	20116.8	0	?	0	525	Calibration	-	71	0.7211	7673.69	0	?	0	525	Calibration	-	71	0.7211	8086.31	0	?	0	525	Calibration	-	71	0.7212	6235.4	0	?	0	525	Calibration	-	71	0.7211	5387.09	0	?
72	0.7312	11852.9	0	?	0	525	Calibration	-	72	0.7313	20132.4	0	?	0	525	Calibration	-	72	0.7312	7653.98	0	?	0	525	Calibration	-	72	0.7312	8081.25	0	?	0	525	Calibration	-	72	0.7313	6263.39	0	?	0	525	Calibration	-	72	0.7312	5390.71	0	?
73	0.7412	11916.5	0	?	0	525	Calibration	-	73	0.7413	20077.3	0	?	0	525	Calibration	-	73	0.7412	7638.32	0	?	0	525	Calibration	-	73	0.7412	8127.27	0	?	0	525	Calibration	-	73	0.7413	6258.29	0	?	0	525	Calibration	-	73	0.7412	5369.24	0	?
74	0.7512	11921.4	0	?	0	525	Calibration	-	74	0.7513	20130.4	0	?	0	525	Calibration	-	74	0.7512	7613.58	0	?	0	525	Calibration	-	74	0.7512	8157.54	0	?	0	525	Calibration	-	74	0.7513	6268.34	0	?	0	525	Calibration	-	74	0.7512	5371.51	0	?
75	0.7612	11882.6	0	?	0	525	Calibration	-	75	0.7613	20100.1	0	?	0	525	Calibration	-	75	0.7612	7631.33	0	?	0	525	Calibration	-	75	0.7612	8114.38	0	?	0	525	Calibration	-	75	0.7613	6265.42	0	?	0	525	Calibration	-	75	0.7612	5380.08	0	?
76	0.7713	11835.5	0	?	0	525	Calibration	-	76	0.7714	20114.6	0	?	0	525	Calibration	-	76	0.7712	7646.19	0	?	0	525	Calibration	-	76	0.7712	8088.28	0	?	0	525	Calibration	-	76	0.7713	6240.63	0	?	0	525	Calibration	-	76	0.7712	5373.17	0	?
77	0.7813	11960.6	0	?	0	525	Calibration	-	77	0.7814	20067.3	0	?	0	525	Calibration	-	77	0.7812	7631.13	0	?	0	525	Calibration	-	77	0.7812	8084.96	0	?	0	525	Calibration	-	77	0.7813	6231.12	0	?	0	525	Calibration	-	77	0.7812	5390.04	0	?
78	0.7913	12076.7	0	?	0	525	Calibration	-	78	0.7914	20051.5	0	?	0	525	Calibration	-	78	0.7913	7636.67	0	?	0	525	Calibration	-	78	0.7913	8103.05	0	?	0	525	Calibration	-	78	0.7914	6223.48	0	?	0	525	Calibration	-	78	0.7913	5411.09	0	?
79	0.8013	12235.4	0	?	0	525	Calibration	-	79	0.8014	20068.2	0	?	0	525	Calibration	-	79	0.8013	7633.25	0	?	0	525	Calibration	-	79	0.8013	8109.34	0	?	0	525	Calibration	-	79	0.8014	6246.86	0	?	0	525	Calibration	-	79	0.8013	5401.16	0	?
80	0.8113	12376.9	0	?	0	525	Calibration	-	80	0.8114	20030.9	0	?	0	525	Calibration	-	80	0.8113	7648.64	0	?	0	525	Calibration	-	80	0.8113	8083.12	0	?	0	525	Calibration	-	80	0.8114	6242.07	0	?	0	525	Calibration	-	80	0.8113	5384.86	0	?
81	0.8213	12440.5	0	?	0	525	Calibration	-	81	0.8214	19991.1	0	?	0	525	Calibration	-	81	0.8213	7647.95	0	?	0	525	Calibration	-	81	0.8213	8095.38	0	?	0	525	Calibration	-	81	0.8214	6256.37	0	?	0	525	Calibration	-	81	0.8213	5373.44	0	?
82	0.8314	12405.1	0	?	0	525	Calibration	-	82	0.8315	19953.8	0	?	0	525	Calibration	-	82	0.8313	7628.65	0	?	0	525	Calibration	-	82	0.8313	8082.22	0	?	0	525	Calibration	-	82	0.8314	6258.54	0	?	0	525	Calibration	-	82	0.8313	5385.95	0	?
83	0.8414	12468.8	0	?	0	525	Calibration	-	83	0.8415	20003.3	0	?	0	525	Calibration	-	83	0.8413	7613.27	0	?	0	525	Calibration	-	83	0.8413	8081.71	0	?	0	525	Calibration	-	83	0.8414	6218.6	0	?	0	525	Calibration	-	83	0.8413	5371.1	0	?
84	0.8514	12458.4	0	?	0	525	Calibration	-	84	0.8515	19999.4	0	?	0	525	Calibration	-	84	0.8513	7638.55	0	?	0	525	Calibration	-	84	0.8513	8101.41	0	?	0	525	Calibration	-	84	0.8515	6237.09	0	?	0	525	Calibration	-	84	0.8513	5379.87	0	?
85	0.8614	12550.7	0	?	0	525	Calibration	-	85	0.8615	20063.2	0	?	0	525	Calibration	-	85	0.8614	7631.01	0	?	0	525	Calibration	-	85	0.8614	8099.57	0	?	0	525	Calibration	-	85	0.8615	6233.38	0	?	0	525	Calibration	-	85	0.8614	5388.49	0	?
86	0.8714	12566.8	0	?	0	525	Calibration	-	86	0.8715	20013.8	0	?	0	525	Calibration	-	86	0.8714	7635.8	0	?	0	525	Calibration	-	86	0.8714	8065.83	0	?	0	525	Calibration	-	86	0.8715	6221.4	0	?	0	525	Calibration	-	86	0.8714	5379.36	0	?
87	0.8814	12550.3	0	?	0	525	Calibration	-	87	0.8816	20025.4	0	?	0	525	Calibration	-	87	0.8814	7630.11	0	?	0	525	Calibration	-	87	0.8814	8117.96	0	?	0	525	Calibration	-	87	0.8815	6231.83	0	?	0	525	Calibration	-	87	0.8814	5360.6	0	?
88	0.8915	12543.5	0	?	0	525	Calibration	-	88	0.8916	20079.3	0	?	0	525	Calibration	-	88	0.8914	7602.63	0	?	0	525	Calibration	-	88	0.8914	8137.06	0	?	0	525	Calibration	-	88	0.8915	6258.5	0	?	0	525	Calibration	-	88	0.8914	5369.86	0	?
89	0.9015	12433.1	0	?	0	525	Calibration	-	89	0.9016	20056.5	0	?	0	525	Calibration	-	89	0.9014	7616.12	0	?	0	525	Calibration	-	89	0.9014	8072.54	0	?	0	525	Calibration	-	89	0.9015	6239.9	0	?	0	525	Calibration	-	89	0.9014	5342.57	0	?
90	0.9115	12384.9	0	?	0	525	Calibration	-	90	0.9116	20043.5	0	?	0	525	Calibration	-	90	0.9114	7605.87	0	?	0	525	Calibration	-	90	0.9114	8044.76	0	?	0	525	Calibration	-	90	0.9116	6245.61	0	?	0	525	Calibration	-	90	0.9114	5355.92	0	?
91	0.9215	12281.6	0	?	0	525	Calibration	-	91	0.9216	20027.6	0	?	0	525	Calibration	-	91	0.9215	7596.02	0	?	0	525	Calibration	-	91	0.9215	8043.59	0	?	0	525	Calibration	-	91	0.9216	6246.78	0	?	0	525	Calibration	-	91	0.9215	5366.53	0	?
92	0.9315	12019.9	0	?	0	525	Calibration	-	92	0.9316	20040.2	0	?	0	525	Calibration	-	92	0.9315	7613.58	0	?	0	525	Calibration	-	92	0.9315	8064.46	0	?	0	525	Calibration	-	92	0.9316	6236.14	0	?	0	525	Calibration	-	92	0.9315	5355.42	0	?
93	0.9415	11740.7	0	?	0	525	Calibration	-	93	0.9417	20043.5	0	?	0	525	Calibration	-	93	0.9415	7594.32	0	?	0	525	Calibration	-	93	0.9415	8061.71	0	?	0	525	Calibration	-	93	0.9416	6237.31	0	?	0	525	Calibration	-	93	0.9415	5357.09	0	?
94	0.9515	11551.2	0	?	0	525	Calibration	-	94	0.9517	20054.9	0	?	0	525	Calibration	-	94	0.9515	7608.34	0	?	0	525	Calibration	-	94	0.9515	8040.09	0	?	0	525	Calibration	-	94	0.9516	6234.64	0	?	0	525	Calibration	-	94	0.9515	5376.34	0	?
95	0.9616	11476.5	0	?	0	525	Calibration	-	95	0.9617	20008.5	0	?	0	525	Calibration	-	95	0.9615	7628.21	0	?	0	525	Calibration	-	95	0.9615	8034.22	0	?	0	525	Calibration	-	95	0.9616	6228.26	0	?	0	525	Calibration	-	95	0.9615	5371.98	0	?
96	0.9716	11421	0	?	0	525	Calibration	-	96	0.9717	20060.5	0	?	0	525	Calibration	-	96	0.9715	7625.78	0	?	0	525	Calibration	-	96	0.9715	8052.52	0	?	0	525	Calibration	-	96	0.9717	6220.64	0	?	0	525	Calibration	-	96	0.9715	5348.88	0	?
97	0.9816	11348.5	0	?	0	525	Calibration	-	97	0.9817	20097.9	0	?	0	525	Calibration	-	97	0.9816	7607	0	?	0	525	Calibration	-	97	0.9816	8011.09	0	?	0	525	Calibration	-	97	0.9817	6206.94	0	?	0	525	Calibration	-	97	0.9816	5364.92	0	?
98	0.9916	11306.1	0	?	0	525	Calibration	-	98	0.9917	20067.5	0	?	0	525	Calibration	-	98	0.9916	7606.38	0	?	0	525	Calibration	-	98	0.9916	8048.27	0	?	0	525	Calibration	-	98	0.9917	6204.94	0	?	0	525	Calibration	-	98	0.9916	5348.47	0	?
99	1.0016	11321	0	?	0	525	Calibration	-	99	1.0018	20069.1	0	?	0	525	Calibration	-	99	1.0016	7606.33	0	?	0	525	Calibration	-	99	1.0016	8044.79	0	?	0	525	Calibration	-	99	1.0017	6208.09	0	?	0	525	Calibration	-	99	1.0016	5366.23	0	?
100	1.0116	11339.3	0	?	0	525	Calibration	-	100	1.0118	19986.3	0	?	0	525	Calibration	-	100	1.0116	7617.07	0	?	0	525	Calibration	-	100	1.0116	8031.13	0	?	0	525	Calibration	-	100	1.0117	6219.89	0	?	0	525	Calibration	-	100	1.0116	5370.39	0	?
101	1.0217	11356.9	0	?	0	525	Calibration	-	101	1.0218	20003.4	0	?	0	525	Calibration	-	101	1.0216	7606.15	0	?	0	525	Calibration	-	101	1.0216	8031.73	0	?	0	525	Calibration	-	101	1.0218	6230.96	0	?	0	525	Calibration	-	101	1.0216	5341.85	0	?
102	1.0317	11299.6	0	?	0	525	Calibration	-	102	1.0318	19966.4	0	?	0	525	Calibration	-	102	1.0316	7608.35	0	?	0	525	Calibration	-	102	1.0316	8022.77	0	?	0	525	Calibration	-	102	1.0318	6214.72	0	?	0	525	Calibration	-	102	1.0316	5339.4	0	?
103	1.0417	11254.8	0	?	0	525	Calibration	-	103	1.0418	19986	0	?	0	525	Calibration	-	103	1.0416	7605.68	0	?	0	525	Calibration	-	103	1.0416	8007.48	0	?	0	525	Calibration	-	103	1.0418	6232.16	0	?	0	525	Calibration	-	103	1.0416	5352.75	0	?
104	1.0517	11248.6	0	?	0	525	Calibration	-	104	1.0519	20038.6	0	?	0	525	Calibration	-	104	1.0517	7615.44	0	?	0	525	Calibration	-	104	1.0517	7980.99	0	?	0	525	Calibration	-	104	1.0518	6213.21	0	?	0	525	Calibration	-	104	1.0517	5343.9	0	?
105	1.0617	11328.1	0	?	0	525	Calibration	-	105	1.0619	20071.5	0	?	0	525	Calibration	-	105	1.0617	7612.91	0	?	0	525	Calibration	-	105	1.0617	7985.62	0	?	0	525	Calibration	-	105	1.0618	6226.88	0	?	0	525	Calibration	-	105	1.0617	5372.85	0	?
106	1.0717	11356.2	0	?	0	525	Calibration	-	106	1.0719	20059.7	0	?	0	525	Calibration	-	106	1.0717	7628.78	0	?	0	525	Calibration	-	106	1.0717	7949.5	0	?	0	525	Calibration	-	106	1.0718	6216.44	0	?	0	525	Calibration	-	106	1.0717	5360.62	0	?
107	1.0818	11408.4	0	?	0	525	Calibration	-	107	1.0819	20075	0	?	0	525	Calibration	-	107	1.0817	7609.75	0	?	0	525	Calibration	-	107	1.0817	7932.54	0	?	0	525	Calibration	-	107	1.0819	6211.36	0	?	0	525	Calibration	-	107	1.0817	5341.35	0	?
108	1.0918	11443.6	0	?	0	525	Calibration	-	108	1.0919	20047	0	?	0	525	Calibration	-	108	1.0917	7600.53	0	?	0	525	Calibration	-	108	1.0917	7955.21	0	?	0	525	Calibration	-	108	1.0919	6244.7	0	?	0	525	Calibration	-	108	1.0917	5337.62	0	?
109	1.1018	11487.1	0	?	0	525	Calibration	-	109	1.1019	20036.3	0	?	0	525	Calibration	-	109	1.1017	7584.48	0	?	0	525	Calibration	-	109	1.1017	7971.2	0	?	0	525	Calibration	-	109	1.1019	6221.84	0	?	0	525	Calibration	-	109	1.1017	5332.98	0	?
110	1.1118	11540	0	?	0	525	Calibration	-	110	1.112	20009.8	0	?	0	525	Calibration	-	110	1.1118	7588.66	0	?	0	525	Calibration	-	110	1.1118	7991.79	0	?	0	525	Calibration	-	110	1.1119	6217.77	0	?	0	525	Calibration	-	110	1.1118	5348.93	0	?
111	1.1218	11618.3	0	?	0	525	Calibration	-	111	1.122	20022.7	0	?	0	525	Calibration	-	111	1.1218	7587.11	0	?	0	525	Calibration	-	111	1.1218	8008.2	0	?	0	525	Calibration	-	111	1.1219	6203.67	0	?	0	525	Calibration	-	111	1.1218	5329.27	0	?
112	1.1318	11634.7	0	?	0	525	Calibration	-	112	1.132	19992.5	0	?	0	525	Calibration	-	112	1.1318	7595.94	0	?	0	525	Calibration	-	112	1.1318	7987.47	0	?	0	525	Calibration	-	112	1.1319	6218.23	0	?	0	525	Calibration	-	112	1.1318	5334.21	0	?
113	1.1419	11610.5	0	?	0	525	Calibration	-	113	1.142	20015.9	0	?	0	525	Calibration	-	113	1.1418	7602.84	0	?	0	525	Calibration	-	113	1.1418	7987.33	0	?	0	525	Calibration	-	113	1.142	6202.9	0	?	0	525	Calibration	-	113	1.1418	5353.09	0	?
114	1.1519	11567.8	0	?	0	525	Calibration	-	114	1.152	20032.9	0	?	0	525	Calibration	-	114	1.1518	7606.22	0	?	0	525	Calibration	-	114	1.1518	7963.38	0	?	0	525	Calibration	-	114	1.152	6206.42	0	?	0	525	Calibration	-	114	1.1518	5338.56	0	?
115	1.1619	11568.3	0	?	0	525	Calibration	-	115	1.162	20045.1	0	?	0	525	Calibration	-	115	1.1618	7593.08	0	?	0	525	Calibration	-	115	1.1618	8016.08	0	?	0	525	Calibration	-	115	1.162	6209.67	0	?	0	525	Calibration	-	115	1.1618	5343.27	0	?
116	1.1719	11639.5	0	?	0	525	Calibration	-	116	1.1721	20050.3	0	?	0	525	Calibration	-	116	1.1719	7586.09	0	?	0	525	Calibration	-	116	1.1719	8018.27	0	?	0	525	Calibration	-	116	1.172	6192.56	0	?	0	525	Calibration	-	116	1.1719	5332.33	0	?
117	1.1819	11587.4	0	?	0	525	Calibration	-	117	1.1821	19989.4	0	?	0	525	Calibration	-	117	1.1819	7573.92	0	?	0	525	Calibration	-	117	1.1819	7996.19	0	?	0	525	Calibration	-	117	1.182	6191.68	0	?	0	525	Calibration	-	117	1.1819	5351.87	0	?
118	1.1919	11570.9	0	?	0	525	Calibration	-	118	1.1921	19996.8	0	?	0	525	Calibration	-	118	1.1919	7565.39	0	?	0	525	Calibration	-	118	1.1919	7966.46	0	?	0	525	Calibration	-	118	1.192	6216.74	0	?	0	525	Calibration	-	118	1.1919	5322.38	0	?
119	1.202	11618.9	0	?	0	525	Calibration	-	119	1.2021	20011	0	?	0	525	Calibration	-	119	1.2019	7577.81	0	?	0	525	Calibration	-	119	1.2019	7972.14	0	?	0	525	Calibration	-	119	1.2021	6181.07	0	?	0	525	Calibration	-	119	1.2019	5341.09	0	?
120	1.212	11611.6	0	?	0	525	Calibration	-	120	1.2121	20006.7	0	?	0	525	Calibration	-	120	1.2119	7584.17	0	?	0	525	Calibration	-	120	1.2119	7978.22	0	?	0	525	Calibration	-	120	1.2121	6204.75	0	?	0	525	Calibration	-	120	1.2119	5326.56	0	?
121	1.222	11577.5	0	?	0	525	Calibration	-	121	1.2221	19996.2	0	?	0	525	Calibration	-	121	1.2219	7583.57	0	?	0	525	Calibration	-	121	1.2219	7945.43	0	?	0	525	Calibration	-	121	1.2221	6176.17	0	?	0	525	Calibration	-	121	1.2219	5321.43	0	?
122	1.232	11664.6	0	?	0	525	Calibration	-	122	1.2322	20003	0	?	0	525	Calibration	-	122	1.232	7575.6	0	?	0	525	Calibration	-	122	1.232	7951.07	0	?	0	525	Calibration	-	122	1.2321	6190.42	0	?	0	525	Calibration	-	122	1.232	5321.05	0	?
123	1.242	11780.1	0	?	0	525	Calibration	-	123	1.2422	19988.9	0	?	0	525	Calibration	-	123	1.242	7592.21	0	?	0	525	Calibration	-	123	1.242	7966.45	0	?	0	525	Calibration	-	123	1.2421	6228.07	0	?	0	525	Calibration	-	123	1.242	5327.65	0	?
124	1.252	11868	0	?	0	525	Calibration	-	124	1.2522	19935	0	?	0	525	Calibration	-	124	1.252	7592.73	0	?	0	525	Calibration	-	124	1.252	7952.04	0	?	0	525	Calibration	-	124	1.2521	6194.47	0	?	0	525	Calibration	-	124	1.252	5328.1	0	?
125	1.2621	11985.8	0	?	0	525	Calibration	-	125	1.2622	19922.4	0	?	0	525	Calibration	-	125	1.262	7583.91	0	?	0	525	Calibration	-	125	1.262	7945.96	0	?	0	525	Calibration	-	125	1.2622	6200.22	0	?	0	525	Calibration	-	125	1.262	5320.7	0	?
126	1.2721	12052.9	0	?	0	525	Calibration	-	126	1.2722	19957.5	0	?	0	525	Calibration	-	126	1.272	7583.15	0	?	0	525	Calibration	-	126	1.272	7938	0	?	0	525	Calibration	-	126	1.2722	6209.29	0	?	0	525	Calibration	-	126	1.272	5327.14	0	?
127	1.2821	12043.8	0	?	0	525	Calibration	-	127	1.2823	19934.2	0	?	0	525	Calibration	-	127	1.282	7589.31	0	?	0	525	Calibration	-	127	1.282	7933.12	0	?	0	525	Calibration	-	127	1.2822	6210.96	0	?	0	525	Calibration	-	127	1.282	5334.58	0	?
128	1.2921	12030.1	0	?	0	525	Calibration	-	128	1.2923	19909.6	0	?	0	525	Calibration	-	128	1.292	7592.52	0	?	0	525	Calibration	-	128	1.292	7940.09	0	?	0	525	Calibration	-	128	1.2922	6190.32	0	?	0	525	Calibration	-	128	1.292	5332.76	0	?
129	1.3021	11956.8	0	?	0	525	Calibration	-	129	1.3023	20026.1	0	?	0	525	Calibration	-	129	1.3021	7584.48	0	?	0	525	Calibration	-	129	1.3021	7946.74	0	?	0	525	Calibration	-	129	1.3022	6195.19	0	?	0	525	Calibration	-	129	1.3021	5327.93	0	?
130	1.3121	11907.5	0	?	0	525	Calibration	-	130	1.3123	20019.8	0	?	0	525	Calibration	-	130	1.3121	7584.53	0	?	0	525	Calibration	-	130	1.3121	7905.1	0	?	0	525	Calibration	-	130	1.3123	6180.28	0	?	0	525	Calibration	-	130	1.3121	5312.99	0	?
131	1.3222	11927.4	0	?	0	525	Calibration	-	131	1.3223	19954.9	0	?	0	525	Calibration	-	131	1.3221	7578.17	0	?	0	525	Calibration	-	131	1.3221	7926.16	0	?	0	525	Calibration	-	131	1.3223	6181.14	0	?	0	525	Calibration	-	131	1.3221	5319.56	0	?
132	1.3322	12019.1	0	?	0	525	Calibration	-	132	1.3323	19915.9	0	?	0	525	Calibration	-	132	1.3321	7568.86	0	?	0	525	Calibration	-	132	1.3321	7937.4	0	?	0	525	Calibration	-	132	1.3323	6173.92	0	?	0	525	Calibration	-	132	1.3321	5321.1	0	?
133	1.3422	12050.1	0	?	0	525	Calibration	-	133	1.3424	19877.2	0	?	0	525	Calibration	-	133	1.3421	7557.75	0	?	0	525	Calibration	-	133	1.3421	7940.02	0	?	0	525	Calibration	-	133	1.3423	6174.73	0	?	0	525	Calibration	-	133	1.3421	5345.04	0	?
134	1.3522	12136.8	0	?	0	525	Calibration	-	134	1.3524	19913.5	0	?	0	525	Calibration	-	134	1.3521	7576.16	0	?	0	525	Calibration	-	134	1.3521	7958.34	0	?	0	525	Calibration	-	134	1.3523	6182.1	0	?	0	525	Calibration	-	134	1.3521	5356.47	0	?
135	1.3622	12269.4	0	?	0	525	Calibration	-	135	1.3624	19945.5	0	?	0	525	Calibration	-	135	1.3622	7574.05	0	?	0	525	Calibration	-	135	1.3622	7911.68	0	?	0	525	Calibration	-	135	1.3623	6190.06	0	?	0	525	Calibration	-	135	1.3622	5315.08	0	?
136	1.3722	12355	0	?	0	525	Calibration	-	136	1.3724	19982.9	0	?	0	525	Calibration	-	136	1.3722	7576.9	0	?	0	525	Calibration	-	136	1.3722	7927.81	0	?	0	525	Calibration	-	136	1.3724	6191.63	0	?	0	525	Calibration	-	136	1.3722	5329.64	0	?
137	1.3822	12270.8	0	?	0	525	Calibration	-	137	1.3824	20000.1	0	?	0	525	Calibration	-	137	1.3822	7591.42	0	?	0	525	Calibration	-	137	1.3822	7928.98	0	?	0	525	Calibration	-	137	1.3824	6170.31	0	?	0	525	Calibration	-	137	1.3822	5341.71	0	?
138	1.3923	12075	0	?	0	525	Calibration	-	138	1.3924	20018.7	0	?	0	525	Calibration	-	138	1.3922	7599.09	0	?	0	525	Calibration	-	138	1.3922	7923.21	0	?	0	525	Calibration	-	138	1.3924	6198.39	0	?	0	525	Calibration	-	138	1.3922	5335.89	0	?
139	1.4023	11989.3	0	?	0	525	Calibration	-	139	1.4025	20059.4	0	?	0	525	Calibration	-	139	1.4022	7590.1	0	?	0	525	Calibration	-	139	1.4022	7878.02	0	?	0	525	Calibration	-	139	1.4024	6187.51	0	?	0	525	Calibration	-	139	1.4022	5323.4	0	?
140	1.4123	11912.2	0	?	0	525	Calibration	-	140	1.4125	20050.8	0	?	0	525	Calibration	-	140	1.4122	7576.86	0	?	0	525	Calibration	-	140	1.4122	7869.29	0	?	0	525	Calibration	-	140	1.4124	6180.68	0	?	0	525	Calibration	-	140	1.4122	5333.94	0	?
141	1.4223	11811.5	0	?	0	525	Calibration	-	141	1.4225	20023.5	0	?	0	525	Calibration	-	141	1.4223	7559.75	0	?	0	525	Calibration	-	141	1.4223	7889.88	0	?	0	525	Calibration	-	141	1.4224	6206.97	0	?	0	525	Calibration	-	141	1.4223	5317.01	0	?
142	1.4323	11717	0	?	0	525	Calibration	-	142	1.4325	19961.6	0	?	0	525	Calibration	-	142	1.4323	7564.37	0	?	0	525	Calibration	-	142	1.4323	7915.47	0	?	0	525	Calibration	-	142	1.4325	6206.34	0	?	0	525	Calibration	-	142	1.4323	5360.77	0	?
143	1.4423	11687.9	0	?	0	525	Calibration	-	143	1.4425	19915	0	?	0	525	Calibration	-	143	1.4423	7551.9	0	?	0	525	Calibration	-	143	1.4423	7938.37	0	?	0	525	Calibration	-	143	1.4425	6194.38	0	?	0	525	Calibration	-	143	1.4423	5341.62	0	?
144	1.4524	11644.6	0	?	0	525	Calibration	-	144	1.4526	19959.1	0	?	0	525	Calibration	-	144	1.4523	7539.63	0	?	0	525	Calibration	-	144	1.4523	7916.02	0	?	0	525	Calibration	-	144	1.4525	6170.91	0	?	0	525	Calibration	-	144	1.4523	5342.56	0	?
145	1.4624	11485.6	0	?	0	525	Calibration	-	145	1.4626	19959.4	0	?	0	525	Calibration	-	145	1.4623	7561.51	0	?	0	525	Calibration	-	145	1.4623	7939.02	0	?	0	525	Calibration	-	145	1.4625	6185.62	0	?	0	525	Calibration	-	145	1.4623	5326.87	0	?
146	1.4724	11446.9	0	?	0	525	Calibration	-	146	1.4726	19983.5	0	?	0	525	Calibration	-	146	1.4723	7552.79	0	?	0	525	Calibration	-	146	1.4723	7936.85	0	?	0	525	Calibration	-	146	1.4725	6155.62	0	?	0	525	Calibration	-	146	1.4723	5335.77	0	?
147	1.4824	11379.7	0	?	0	525	Calibration	-	147	1.4826	19995.3	0	?	0	525	Calibration	-	147	1.4823	7557.56	0	?	0	525	Calibration	-	147	1.4823	7928.75	0	?	0	525	Calibration	-	147	1.4825	6177.51	0	?	0	525	Calibration	-	147	1.4823	5331.63	0	?
148	1.4924	11310.4	0	?	0	525	Calibration	-	148	1.4926	19984.5	0	?	0	525	Calibration	-	148	1.4924	7556.98	0	?	0	525	Calibration	-	148	1.4924	7906.72	0	?	0	525	Calibration	-	148	1.4926	6180.46	0	?	0	525	Calibration	-	148	1.4924	5347.64	0	?
149	1.5024	11279.2	0	?	0	525	Calibration	-	149	1.5026	19981.3	0	?	0	525	Calibration	-	149	1.5024	7556.58	0	?	0	525	Calibration	-	149	1.5024	7939.85	0	?	0	525	Calibration	-	149	1.5026	6174.38	0	?	0	525	Calibration	-	149	1.5024	5332.51	0	?
150	1.5125	11228.9	0	?	0	525	Calibration	-	150	1.5127	20004.3	0	?	0	525	Calibration	-	150	1.5124	7546.84	0	?	0	525	Calibration	-	150	1.5124	7915.72	0	?	0	525	Calibration	-	150	1.5126	6173.15	0	?	0	525	Calibration	-	150	1.5124	5338.92	0	?
151	1.5225	11186.2	0	?	0	525	Calibration	-	151	1.5227	20003.4	0	?	0	525	Calibration	-	151	1.5224	7540.86	0	?	0	525	Calibration	-	151	1.5224	7873.84	0	?	0	525	Calibration	-	151	1.5226	6175.47	0	?	0	525	Calibration	-	151	1.5224	5320.41	0	?
152	1.5325	11205.6	0	?	0	525	Calibration	-	152	1.5327	19937.2	0	?	0	525	Calibration	-	152	1.5324	7548.17	0	?	0	525	Calibration	-	152	1.5324	7869.46	0	?	0	525	Calibration	-	152	1.5326	6168.08	0	?	0	525	Calibration	-	152	1.5324	5314.38	0	?
153	1.5425	11266.2	0	?	0	525	Calibration	-	153	1.5427	19955.1	0	?	0	525	Calibration	-	153	1.5424	7558.03	0	?	0	525	Calibration	-	153	1.5424	7894.06	0	?	0	525	Calibration	-	153	1.5426	6159.39	0	?	0	525	Calibration	-	153	1.5424	5309.39	0	?
154	1.5525	11338	0	?	0	525	Calibration	-	154	1.5527	19967.1	0	?	0	525	Calibration	-	154	1.5525	7547.66	0	?	0	525	Calibration	-	154	1.5525	7883.82	0	?	0	525	Calibration	-	154	1.5527	6161.2	0	?	0	525	Calibration	-	154	1.5525	5325.51	0	?
155	1.5625	11238.1	0	?	0	525	Calibration	-	155	1.5627	19943.2	0	?	0	525	Calibration	-	155	1.5625	7541.24	0	?	0	525	Calibration	-	155	1.5625	7867.06	0	?	0	525	Calibration	-	155	1.5627	6149.54	0	?	0	525	Calibration	-	155	1.5625	5330.28	0	?
156	1.5726	11115.1	0	?	0	525	Calibration	-	156	1.5728	19932.8	0	?	0	525	Calibration	-	156	1.5725	7541.22	0	?	0	525	Calibration	-	156	1.5725	7876.92	0	?	0	525	Calibration	-	156	1.5727	6172.29	0	?	0	525	Calibration	-	156	1.5725	5322.47	0	?
157	1.5826	11087.1	0	?	0	525	Calibration	-	157	1.5828	19975.7	0	?	0	525	Calibration	-	157	1.5825	7532.57	0	?	0	525	Calibration	-	157	1.5825	7864.11	0	?	0	525	Calibration	-	157	1.5827	6164.62	0	?	0	525	Calibration	-	157	1.5825	5291.79	0	?
158	1.5926	11120.5	0	?	0	525	Calibration	-	158	1.5928	19962.8	0	?	0	525	Calibration	-	158	1.5925	7535.34	0	?	0	525	Calibration	-	158	1.5925	7863.85	0	?	0	525	Calibration	-	158	1.5927	6139.98	0	?	0	525	Calibration	-	158	1.5925	5317.92	0	?
159	1.6026	11199.4	0	?	0	525	Calibration	-	159	1.6028	20004	0	?	0	525	Calibration	-	159	1.6025	7531.38	0	?	0	525	Calibration	-	159	1.6025	7877.42	0	?	0	525	Calibration	-	159	1.6027	6165.57	0	?	0	525	Calibration	-	159	1.6025	5315.94	0	?
160	1.6126	11225.6	0	?	0	525	Calibration	-	160	1.6128	20048.9	0	?	0	525	Calibration	-	160	1.6126	7555.85	0	?	0	525	Calibration	-	160	1.6126	7879.24	0	?	0	525	Calibration	-	160	1.6128	6165.88	0	?	0	525	Calibration	-	160	1.6126	5329.38	0	?
161	1.6226	11367.3	0	?	0	525	Calibration	-	161	1.6229	20085.4	0	?	0	525	Calibration	-	161	1.6226	7536.46	0	?	0	525	Calibration	-	161	1.6226	7843.75	0	?	0	525	Calibration	-	161	1.6228	6149.54	0	?	0	525	Calibration	-	161	1.6226	5314.59	0	?
162	1.6327	11529.6	0	?	0	525	Calibration	-	162	1.6329	20030.7	0	?	0	525	Calibration	-	162	1.6326	7528.69	0	?	0	525	Calibration	-	162	1.6326	7873.57	0	?	0	525	Calibration	-	162	1.6328	6155.57	0	?	0	525	Calibration	-	162	1.6326	5313.3	0	?
163	1.6427	11616.6	0	?	0	525	Calibration	-	163	1.6429	20028.8	0	?	0	525	Calibration	-	163	1.6426	7530.38	0	?	0	525	Calibration	-	163	1.6426	7857.12	0	?	0	525	Calibration	-	163	1.6428	6185.99	0	?	0	525	Calibration	-	163	1.6426	5314.38	0	?
164	1.6527	11671.2	0	?	0	525	Calibration	-	164	1.6529	19976.8	0	?	0	525	Calibration	-	164	1.6526	7523.1	0	?	0	525	Calibration	-	164	1.6526	7859.6	0	?	0	525	Calibration	-	164	1.6528	6157.95	0	?	0	525	Calibration	-	164	1.6526	5317.17	0	?
165	1.6627	11658	0	?	0	525	Calibration	-	165	1.6629	19940.3	0	?	0	525	Calibration	-	165	1.6626	7492.92	0	?	0	525	Calibration	-	165	1.6626	7877.36	0	?	0	525	Calibration	-	165	1.6629	6165	0	?	0	525	Calibration	-	165	1.6626	5308.06	0	?
166	1.6727	11492.6	0	?	0	525	Calibration	-	166	1.6729	19946.2	0	?	0	525	Calibration	-	166	1.6726	7496.85	0	?	0	525	Calibration	-	166	1.6726	7879	0	?	0	525	Calibration	-	166	1.6729	6172.06	0	?	0	525	Calibration	-	166	1.6726	5326.83	0	?
167	1.6827	11498.4	0	?	0	525	Calibration	-	167	1.683	19920	0	?	0	525	Calibration	-	167	1.6827	7530.12	0	?	0	525	Calibration	-	167	1.6827	7857.87	0	?	0	525	Calibration	-	167	1.6829	6150.22	0	?	0	525	Calibration	-	167	1.6827	5326.59	0	?
168	1.6928	11595	0	?	0	525	Calibration	-	168	1.693	19931.8	0	?	0	525	Calibration	-	168	1.6927	7547.33	0	?	0	525	Calibration	-	168	1.6927	7816.63	0	?	0	525	Calibration	-	168	1.6929	6147.19	0	?	0	525	Calibration	-	168	1.6927	5312.21	0	?
169	1.7028	11719.4	0	?	0	525	Calibration	-	169	1.703	19915.8	0	?	0	525	Calibration	-	169	1.7027	7537.92	0	?	0	525	Calibration	-	169	1.7027	7835.63	0	?	0	525	Calibration	-	169	1.7029	6123.72	0	?	0	525	Calibration	-	169	1.7027	5317.21	0	?
170	1.7128	11795.6	0	?	0	525	Calibration	-	170	1.713	19936.5	0	?	0	525	Calibration	-	170	1.7127	7510.82	0	?	0	525	Calibration	-	170	1.7127	7804.59	0	?	0	525	Calibration	-	170	1.7129	6134.12	0	?	0	525	Calibration	-	170	1.7127	5327.27	0	?
171	1.7228	11912.4	0	?	0	525	Calibration	-	171	1.723	19949	0	?	0	525	Calibration	-	171	1.7227	7543.44	0	?	0	525	Calibration	-	171	1.7227	7826.56	0	?	0	525	Calibration	-	171	1.723	6124.71	0	?	0	525	Calibration	-	171	1.7227	5312.11	0	?
172	1.7328	11936.1	0	?	0	525	Calibration	-	172	1.733	19901.2	0	?	0	525	Calibration	-	172	1.7327	7525.13	0	?	0	525	Calibration	-	172	1.7327	7861.05	0	?	0	525	Calibration	-	172	1.733	6139.83	0	?	0	525	Calibration	-	172	1.7327	5317.54	0	?
173	1.7428	11958.1	0	?	0	525	Calibration	-	173	1.7431	19863.6	0	?	0	525	Calibration	-	173	1.7428	7511.86	0	?	0	525	Calibration	-	173	1.7428	7844.88	0	?	0	525	Calibration	-	173	1.743	6144.91	0	?	0	525	Calibration	-	173	1.7428	5297.45	0	?
174	1.7529	11967	0	?	0	525	Calibration	-	174	1.7531	19921.7	0	?	0	525	Calibration	-	174	1.7528	7522.82	0	?	0	525	Calibration	-	174	1.7528	7837.46	0	?	0	525	Calibration	-	174	1.753	6143.68	0	?	0	525	Calibration	-	174	1.7528	5331.16	0	?
175	1.7629	11903.9	0	?	0	525	Calibration	-	175	1.7631	19944.4	0	?	0	525	Calibration	-	175	1.7628	7528.89	0	?	0	525	Calibration	-	175	1.7628	7833.4	0	?	0	525	Calibration	-	175	1.763	6146.38	0	?	0	525	Calibration	-	175	1.7628	5324.42	0	?
176	1.7729	11886.4	0	?	0	525	Calibration	-	176	1.7731	19944	0	?	0	525	Calibration	-	176	1.7728	7536.07	0	?	0	525	Calibration	-	176	1.7728	7841.71	0	?	0	525	Calibration	-	176	1.773	6123.96	0	?	0	525	Calibration	-	176	1.7728	5327.56	0	?
177	1.7829	11814.4	0	?	0	525	Calibration	-	177	1.7831	19971	0	?	0	525	Calibration	-	177	1.7828	7544.33	0	?	0	525	Calibration	-	177	1.7828	7825.81	0	?	0	525	Calibration	-	177	1.7831	6141.38	0	?	0	525	Calibration	-	177	1.7828	5322.92	0	?
178	1.7929	11826.7	0	?	0	525	Calibration	-	178	1.7932	20036.6	0	?	0	525	Calibration	-	178	1.7928	7531.92	0	?	0	525	Calibration	-	178	1.7928	7820.17	0	?	0	525	Calibration	-	178	1.7931	6139.84	0	?	0	525	Calibration	-	178	1.7928	5324.55	0	?
179	1.8029	11832.6	0	?	0	525	Calibration	-	179	1.8032	19998.3	0	?	0	525	Calibration	-	179	1.8029	7542.98	0	?	0	525	Calibration	-	179	1.8029	7801.36	0	?	0	525	Calibration	-	179	1.8031	6148.86	0	?	0	525	Calibration	-	179	1.8029	5300.91	0	?
180	1.813	11968.3	0	?	0	525	Calibration	-	180	1.8132	19967.7	0	?	0	525	Calibration	-	180	1.8129	7523.7	0	?	0	525	Calibration	-	180	1.8129	7787.23	0	?	0	525	Calibration	-	180	1.8131	6155.63	0	?	0	525	Calibration	-	180	1.8129	5294.77	0	?
181	1.823	12155.9	0	?	0	525	Calibration	-	181	1.8232	19977.5	0	?	0	525	Calibration	-	181	1.8229	7535.39	0	?	0	525	Calibration	-	181	1.8229	7803.35	0	?	0	525	Calibration	-	181	1.8231	6159.36	0	?	0	525	Calibration	-	181	1.8229	5305.57	0	?
182	1.833	12225.6	0	?	0	525	Calibration	-	182	1.8332	20002.1	0	?	0	525	Calibration	-	182	1.8329	7532.54	0	?	0	525	Calibration	-	182	1.8329	7808.41	0	?	0	525	Calibration	-	182	1.8331	6164.59	0	?	0	525	Calibration	-	182	1.8329	5316.31	0	?
183	1.843	12228.5	0	?	0	525	Calibration	-	183	1.8432	19937.7	0	?	0	525	Calibration	-	183	1.8429	7529	0	?	0	525	Calibration	-	183	1.8429	7807.87	0	?	0	525	Calibration	-	183	1.8432	6163.64	0	?	0	525	Calibration	-	183	1.8429	5321.47	0	?
184	1.853	12154.9	0	?	0	525	Calibration	-	184	1.8533	19945.9	0	?	0	525	Calibration	-	184	1.8529	7514.58	0	?	0	525	Calibration	-	184	1.8529	7843.3	0	?	0	525	Calibration	-	184	1.8532	6145.39	0	?	0	525	Calibration	-	184	1.8529	5335.31	0	?
185	1.863	12085.7	0	?	0	525	Calibration	-	185	1.8633	19964.7	0	?	0	525	Calibration	-	185	1.8629	7526.81	0	?	0	525	Calibration	-	185	1.8629	7832.63	0	?	0	525	Calibration	-	185	1.8632	6163.87	0	?	0	525	Calibration	-	185	1.8629	5314.99	0	?
186	1.873	11978.2	0	?	0	525	Calibration	-	186	1.8733	19983.5	0	?	0	525	Calibration	-	186	1.873	7514.56	0	?	0	525	Calibration	-	186	1.873	7816.47	0	?	0	525	Calibration	-	186	1.8732	6144.22	0	?	0	525	Calibration	-	186	1.873	5313.82	0	?
187	1.8831	11859.1	0	?	0	525	Calibration	-	187	1.8833	19930.6	0	?	0	525	Calibration	-	187	1.883	7518.56	0	?	0	525	Calibration	-	187	1.883	7838.8	0	?	0	525	Calibration	-	187	1.8832	6146.31	0	?	0	525	Calibration	-	187	1.883	5307.61	0	?
188	1.8931	11842.4	0	?	0	525	Calibration	-	188	1.8933	19946	0	?	0	525	Calibration	-	188	1.893	7514.6	0	?	0	525	Calibration	-	188	1.893	7810.94	0	?	0	525	Calibration	-	188	1.8932	6139.44	0	?	0	525	Calibration	-	188	1.893	5309.69	0	?
189	1.9031	11794.3	0	?	0	525	Calibration	-	189	1.9033	19964.3	0	?	0	525	Calibration	-	189	1.903	7525.41	0	?	0	525	Calibration	-	189	1.903	7817.41	0	?	0	525	Calibration	-	189	1.9033	6141.22	0	?	0	525	Calibration	-	189	1.903	5331.17	0	?
190	1.9131	11705.5	0	?	0	525	Calibration	-	190	1.9134	19880.5	0	?	0	525	Calibration	-	190	1.913	7525.95	0	?	0	525	Calibration	-	190	1.913	7835.58	0	?	0	525	Calibration	-	190	1.9133	6133.93	0	?	0	525	Calibration	-	190	1.913	5327.49	0	?
191	1.9231	11723.6	0	?	0	525	Calibration	-	191	1.9234	19859.5	0	?	0	525	Calibration	-	191	1.923	7524.19	0	?	0	525	Calibration	-	191	1.923	7835.51	0	?	0	525	Calibration	-	191	1.9233	6150.24	0	?	0	525	Calibration	-	191	1.923	5316.94	0	?
192	1.9331	11727.1	0	?	0	525	Calibration	-	192	1.9334	19876.9	0	?	0	525	Calibration	-	192	1.9331	7531.06	0	?	0	525	Calibration	-	192	1.9331	7869.74	0	?	0	525	Calibration	-	192	1.9333	6126.94	0	?	0	525	Calibration	-	192	1.9331	5302.83	0	?
193	1.9432	11616.4	0	?	0	525	Calibration	-	193	1.9434	19872.9	0	?	0	525	Calibration	-	193	1.9431	7525.26	0	?	0	525	Calibration	-	193	1.9431	7844.82	0	?	0	525	Calibration	-	193	1.9433	6133.11	0	?	0	525	Calibration	-	193	1.9431	5318.13	0	?
194	1.9532	11572.1	0	?	0	525	Calibration	-	194	1.9534	19889.9	0	?	0	525	Calibration	-	194	1.9531	7521.44	0	?	0	525	Calibration	-	194	1.9531	7779.27	0	?	0	525	Calibration	-	194	1.9534	6134.53	0	?	0	525	Calibration	-	194	1.9531	5299.97	0	?
195	1.9632	11597.5	0	?	0	525	Calibration	-	195	1.9635	19901.6	0	?	0	525	Calibration	-	195	1.9631	7505.18	0	?	0	525	Calibration	-	195	1.9631	7822.75	0	?	0	525	Calibration	-	195	1.9634	6134.7	0	?	0	525	Calibration	-	195	1.9631	5323.17	0	?
196	1.9732	11622.7	0	?	0	525	Calibration	-	196	1.9735	19921.2	0	?	0	525	Calibration	-	196	1.9731	7517.16	0	?	0	525	Calibration	-	196	1.9731	7861.55	0	?	0	525	Calibration	-	196	1.9734	6133.76	0	?	0	525	Calibration	-	196	1.9731	5290.24	0	?
197	1.9832	11590.7	0	?	0	525	Calibration	-	197	1.9835	19901.9	0	?	0	525	Calibration	-	197	1.9831	7507.29	0	?	0	525	Calibration	-	197	1.9831	7855.58	0	?	0	525	Calibration	-	197	1.9834	6141.97	0	?	0	525	Calibration	-	197	1.9831	5306.89	0	?
198	1.9932	11604.5	0	?	0	525	Calibration	-	198	1.9935	20006.1	0	?	0	525	Calibration	-	198	1.9932	7526.01	0	?	0	525	Calibration	-	198	1.9932	7838.8	0	?	0	525	Calibration	-	198	1.9934	6112.91	0	?	0	525	Calibration	-	198	1.9932	5297.51	0	?
199	2.0033	11649	0	?	0	525	Calibration	-	199	2.0035	19997.9	0	?	0	525	Calibration	-	199	2.0032	7509.42	0	?	0	525	Calibration	-	199	2.0032	7833.94	0	?	0	525	Calibration	-	199	2.0034	6139.63	0	?	0	525	Calibration	-	199	2.0032	5319.62	0	?
200	2.0133	11675	0	?	0	525	Calibration	-	200	2.0135	20003.4	0	?	0	525	Calibration	-	200	2.0132	7520.11	0	?	0	525	Calibration	-	200	2.0132	7805.81	0	?	0	525	Calibration	-	200	2.0135	6142.69	0	?	0	525	Calibration	-	200	2.0132	5303.82	0	?
201	2.0233	11664.2	0	?	0	525	Calibration	-	201	2.0236	20020.6	0	?	0	525	Calibration	-	201	2.0232	7516.66	0	?	0	525	Calibration	-	201	2.0232	7788.98	0	?	0	525	Calibration	-	201	2.0235	6137.58	0	?	0	525	Calibration	-	201	2.0232	5294.52	0	?
202	2.0333	11628	0	?	0	525	Calibration	-	202	2.0336	19978.1	0	?	0	525	Calibration	-	202	2.0332	7514.91	0	?	0	525	Calibration	-	202	2.0332	7798.76	0	?	0	525	Calibration	-	202	2.0335	6112.5	0	?	0	525	Calibration	-	202	2.0332	5303.92	0	?
203	2.0433	11585.9	0	?	0	525	Calibration	-	203	2.0436	19985.1	0	?	0	525	Calibration	-	203	2.0432	7514.55	0	?	0	525	Calibration	-	203	2.0432	7825.16	0	?	0	525	Calibration	-	203	2.0435	6119.62	0	?	0	525	Calibration	-	203	2.0432	5285.58	0	?
204	2.0533	11604.8	0	?	0	525	Calibration	-	204	2.0536	19993.9	0	?	0	525	Calibration	-	204	2.0533	7508.37	0	?	0	525	Calibration	-	204	2.0533	7802.05	0	?	0	525	Calibration	-	204	2.0535	6141.83	0	?	0	525	Calibration	-	204	2.0533	5319.49	0	?
205	2.0634	11662.4	0	?	0	525	Calibration	-	205	2.0636	19967	0	?	0	525	Calibration	-	205	2.0633	7512.03	0	?	0	525	Calibration	-	205	2.0633	7789.86	0	?	0	525	Calibration	-	205	2.0635	6135.36	0	?	0	525	Calibration	-	205	2.0633	5296.56	0	?
206	2.0734	11695.7	0	?	0	525	Calibration	-	206	2.0736	19912	0	?	0	525	Calibration	-	206	2.0733	7496.92	0	?	0	525	Calibration	-	206	2.0733	7793.57	0	?	0	525	Calibration	-	206	2.0736	6141.74	0	?	0	525	Calibration	-	206	2.0733	5301.92	0	?
207	2.0834	11671.4	0	?	0	525	Calibration	-	207	2.0837	19977.6	0	?	0	525	Calibration	-	207	2.0833	7501.17	0	?	0	525	Calibration	-	207	2.0833	7808.89	0	?	0	525	Calibration	-	207	2.0836	6140.04	0	?	0	525	Calibration	-	207	2.0833	5300.61	0	?
208	2.0934	11655.9	0	?	0	525	Calibration	-	208	2.0937	19997.8	0	?	0	525	Calibration	-	208	2.0933	7485.38	0	?	0	525	Calibration	-	208	2.0933	7823.35	0	?	0	525	Calibration	-	208	2.0936	6144.78	0	?	0	525	Calibration	-	208	2.0933	5283.01	0	?
209	2.1034	11592.2	0	?	0	525	Calibration	-	209	2.1037	19978.8	0	?	0	525	Calibration	-	209	2.1033	7470.65	0	?	0	525	Calibration	-	209	2.1033	7840.07	0	?	0	525	Calibration	-	209	2.1036	6132.89	0	?	0	525	Calibration	-	209	2.1033	5306.16	0	?
210	2.1134	11576.4	0	?	0	525	Calibration	-	210	2.1137	19971.5	0	?	0	525	Calibration	-	210	2.1133	7478.1	0	?	0	525	Calibration	-	210	2.1133	7819.69	0	?	0	525	Calibration	-	210	2.1136	6132.09	0	?	0	525	Calibration	-	210	2.1133	5296.72	0	?
211	2.1235	11653.6	0	?	0	525	Calibration	-	211	2.1237	19960	0	?	0	525	Calibration	-	211	2.1234	7486.72	0	?	0	525	Calibration	-	211	2.1234	7804.44	0	?	0	525	Calibration	-	211	2.1236	6115.97	0	?	0	525	Calibration	-	211	2.1234	5287.89	0	?
212	2.1335	11658.8	0	?	0	525	Calibration	-	212	2.1338	19956.5	0	?	0	525	Calibration	-	212	2.1334	7482.52	0	?	0	525	Calibration	-	212	2.1334	7814.06	0	?	0	525	Calibration	-	212	2.1337	6101.98	0	?	0	525	Calibration	-	212	2.1334	5291.86	0	?
213	2.1435	11678.1	0	?	0	525	Calibration	-	213	2.1438	20005.2	0	?	0	525	Calibration	-	213	2.1434	7494.12	0	?	0	525	Calibration	-	213	2.1434	7798.78	0	?	0	525	Calibration	-	213	2.1437	6119.24	0	?	0	525	Calibration	-	213	2.1434	5292.83	0	?
214	2.1535	11669	0	?	0	525	Calibration	-	214	2.1538	20021.8	0	?	0	525	Calibration	-	214	2.1534	7497.53	0	?	0	525	Calibration	-	214	2.1534	7799.07	0	?	0	525	Calibration	-	214	2.1537	6131.44	0	?	0	525	Calibration	-	214	2.1534	5294.2	0	?
215	2.1635	11531.4	0	?	0	525	Calibration	-	215	2.1638	19986.6	0	?	0	525	Calibration	-	215	2.1634	7502.43	0	?	0	525	Calibration	-	215	2.1634	7801.2	0	?	0	525	Calibration	-	215	2.1637	6119.11	0	?	0	525	Calibration	-	215	2.1634	5293.76	0	?
216	2.1735	11554.4	0	?	0	525	Calibration	-	216	2.1738	19926.8	0	?	0	525	Calibration	-	216	2.1734	7496.65	0	?	0	525	Calibration	-	216	2.1734	7787.19	0	?	0	525	Calibration	-	216	2.1737	6122.54	0	?	0	525	Calibration	-	216	2.1734	5290.27	0	?
217	2.1836	11629.3	0	?	0	525	Calibration	-	217	2.1838	19880.9	0	?	0	525	Calibration	-	217	2.1835	7484.25	0	?	0	525	Calibration	-	217	2.1835	7780.69	0	?	0	525	Calibration	-	217	2.1837	6135.8	0	?	0	525	Calibration	-	217	2.1835	5288.66	0	?
218	2.1936	11657.7	0	?	0	525	Calibration	-	218	2.1939	19941.2	0	?	0	525	Calibration	-	218	2.1935	7487.6	0	?	0	525	Calibration	-	218	2.1935	7775.29	0	?	0	525	Calibration	-	218	2.1938	6127	0	?	0	525	Calibration	-	218	2.1935	5283.58	0	?
219	2.2036	11735.5	0	?	0	525	Calibration	-	219	2.2039	19949.2	0	?	0	525	Calibration	-	219	2.2035	7484.25	0	?	0	525	Calibration	-	219	2.2035	7753	0	?	0	525	Calibration	-	219	2.2038	6135.31	0	?	0	525	Calibration	-	219	2.2035	5280.98	0	?
220	2.2136	11834.3	0	?	0	525	Calibration	-	220	2.2139	19937.7	0	?	0	525	Calibration	-	220	2.2135	7491.21	0	?	0	525	Calibration	-	220	2.2135	7753.56	0	?	0	525	Calibration	-	220	2.2138	6135.07	0	?	0	525	Calibration	-	220	2.2135	5286.97	0	?
221	2.2236	11738.9	0	?	0	525	Calibration	-	221	2.2239	19986.1	0	?	0	525	Calibration	-	221	2.2235	7470.87	0	?	0	525	Calibration	-	221	2.2235	7752.52	0	?	0	525	Calibration	-	221	2.2238	6128.54	0	?	0	525	Calibration	-	221	2.2235	5293.17	0	?
222	2.2336	11777.5	0	?	0	525	Calibration	-	222	2.2339	19961	0	?	0	525	Calibration	-	222	2.2335	7472.48	0	?	0	525	Calibration	-	222	2.2335	7739	0	?	0	525	Calibration	-	222	2.2338	6109.59	0	?	0	525	Calibration	-	222	2.2335	5302.49	0	?
223	2.2437	11773.8	0	?	0	525	Calibration	-	223	2.2439	20010.2	0	?	0	525	Calibration	-	223	2.2436	7473.63	0	?	0	525	Calibration	-	223	2.2436	7739.09	0	?	0	525	Calibration	-	223	2.2438	6125.14	0	?	0	525	Calibration	-	223	2.2436	5306.83	0	?
224	2.2537	11773.6	0	?	0	525	Calibration	-	224	2.254	20011.9	0	?	0	525	Calibration	-	224	2.2536	7477.94	0	?	0	525	Calibration	-	224	2.2536	7739.51	0	?	0	525	Calibration	-	224	2.2539	6106.7	0	?	0	525	Calibration	-	224	2.2536	5292.69	0	?
225	2.2637	11897.4	0	?	0	525	Calibration	-	225	2.264	20033.4	0	?	0	525	Calibration	-	225	2.2636	7486.73	0	?	0	525	Calibration	-	225	2.2636	7755.4	0	?	0	525	Calibration	-	225	2.2639	6133.59	0	?	0	525	Calibration	-	225	2.2636	5285.64	0	?
226	2.2737	11970.1	0	?	0	525	Calibration	-	226	2.274	20066.8	0	?	0	525	Calibration	-	226	2.2736	7478.73	0	?	0	525	Calibration	-	226	2.2736	7763.19	0	?	0	525	Calibration	-	226	2.2739	6115.41	0	?	0	525	Calibration	-	226	2.2736	5268.28	0	?
227	2.2837	12069.3	0	?	0	525	Calibration	-	227	2.284	19972.9	0	?	0	525	Calibration	-	227	2.2836	7480.43	0	?	0	525	Calibration	-	227	2.2836	7762.7	0	?	0	525	Calibration	-	227	2.2839	6130.83	0	?	0	525	Calibration	-	227	2.2836	5288.79	0	?
228	2.2937	12144.9	0	?	0	525	Calibration	-	228	2.294	19855.3	0	?	0	525	Calibration	-	228	2.2936	7476.17	0	?	0	525	Calibration	-	228	2.2936	7780.31	0	?	0	525	Calibration	-	228	2.2939	6108.14	0	?	0	525	Calibration	-	228	2.2936	5285.18	0	?
229	2.3037	12177.8	0	?	0	525	Calibration	-	229	2.3041	19896.5	0	?	0	525	Calibration	-	229	2.3036	7457.45	0	?	0	525	Calibration	-	229	2.3036	7774.07	0	?	0	525	Calibration	-	229	2.304	6102.23	0	?	0	525	Calibration	-	229	2.3036	5280.43	0	?
230	2.3138	12206.9	0	?	0	525	Calibration	-	230	2.3141	19956.8	0	?	0	525	Calibration	-	230	2.3137	7470.85	0	?	0	525	Calibration	-	230	2.3137	7767.13	0	?	0	525	Calibration	-	230	2.314	6114.01	0	?	0	525	Calibration	-	230	2.3137	5292.26	0	?
231	2.3238	12106.8	0	?	0	525	Calibration	-	231	2.3241	19954.7	0	?	0	525	Calibration	-	231	2.3237	7450.83	0	?	0	525	Calibration	-	231	2.3237	7756.75	0	?	0	525	Calibration	-	231	2.324	6117.29	0	?	0	525	Calibration	-	231	2.3237	5267.87	0	?
232	2.3338	11986.2	0	?	0	525	Calibration	-	232	2.3341	19979.9	0	?	0	525	Calibration	-	232	2.3337	7447.07	0	?	0	525	Calibration	-	232	2.3337	7752.97	0	?	0	525	Calibration	-	232	2.334	6124.57	0	?	0	525	Calibration	-	232	2.3337	5283.05	0	?
233	2.3438	11863.9	0	?	0	525	Calibration	-	233	2.3441	19971	0	?	0	525	Calibration	-	233	2.3437	7447.02	0	?	0	525	Calibration	-	233	2.3437	7759.54	0	?	0	525	Calibration	-	233	2.344	6095.52	0	?	0	525	Calibration	-	233	2.3437	5288.27	0	?
234	2.3538	11690.4	0	?	0	525	Calibration	-	234	2.3541	19961.9	0	?	0	525	Calibration	-	234	2.3537	7461.81	0	?	0	525	Calibration	-	234	2.3537	7743.7	0	?	0	525	Calibration	-	234	2.354	6096.69	0	?	0	525	Calibration	-	234	2.3537	5298.79	0	?
235	2.3638	11605.1	0	?	0	525	Calibration	-	235	2.3642	19913.2	0	?	0	525	Calibration	-	235	2.3637	7468.08	0	?	0	525	Calibration	-	235	2.3637	7769.52	0	?	0	525	Calibration	-	235	2.3641	6090.58	0	?	0	525	Calibration	-	235	2.3637	5286.43	0	?
236	2.3739	11521.1	0	?	0	525	Calibration	-	236	2.3742	19905.1	0	?	0	525	Calibration	-	236	2.3738	7457.48	0	?	0	525	Calibration	-	236	2.3738	7715.95	0	?	0	525	Calibration	-	236	2.3741	6092.55	0	?	0	525	Calibration	-	236	2.3738	5269.63	0	?
237	2.3839	11423.2	0	?	0	525	Calibration	-	237	2.3842	19923.3	0	?	0	525	Calibration	-	237	2.3838	7470.49	0	?	0	525	Calibration	-	237	2.3838	7687.22	0	?	0	525	Calibration	-	237	2.3841	6098.59	0	?	0	525	Calibration	-	237	2.3838	5289.42	0	?
238	2.3939	11424.9	0	?	0	525	Calibration	-	238	2.3942	19942.7	0	?	0	525	Calibration	-	238	2.3938	7475.58	0	?	0	525	Calibration	-	238	2.3938	7692.56	0	?	0	525	Calibration	-	238	2.3941	6112.22	0	?	0	525	Calibration	-	238	2.3938	5265.59	0	?
239	2.4039	11432.7	0	?	0	525	Calibration	-	239	2.4042	19908.1	0	?	0	525	Calibration	-	239	2.4038	7466.98	0	?	0	525	Calibration	-	239	2.4038	7706.7	0	?	0	525	Calibration	-	239	2.4041	6106.4	0	?	0	525	Calibration	-	239	2.4038	5257.88	0	?
240	2.4139	11387	0	?	0	525	Calibration	-	240	2.4142	19928.7	0	?	0	525	Calibration	-	240	2.4138	7470.39	0	?	0	525	Calibration	-	240	2.4138	7705.27	0	?	0	525	Calibration	-	240	2.4141	6094.58	0	?	0	525	Calibration	-	240	2.4138	5274.41	0	?
241	2.4239	11368	0	?	0	525	Calibration	-	241	2.4243	19873.1	0	?	0	525	Calibration	-	241	2.4238	7466.75	0	?	0	525	Calibration	-	241	2.4238	7735.46	0	?	0	525	Calibration	-	241	2.4242	6097.51	0	?	0	525	Calibration	-	241	2.4238	5286.46	0	?
242	2.434	11412.5	0	?	0	525	Calibration	-	242	2.4343	19909	0	?	0	525	Calibration	-	242	2.4339	7467.45	0	?	0	525	Calibration	-	242	2.4339	7711.4	0	?	0	525	Calibration	-	242	2.4342	6099.62	0	?	0	525	Calibration	-	242	2.4339	5276.27	0	?
243	2.444	11479.6	0	?	0	525	Calibration	-	243	2.4443	19961.4	0	?	0	525	Calibration	-	243	2.4439	7458.58	0	?	0	525	Calibration	-	243	2.4439	7737.19	0	?	0	525	Calibration	-	243	2.4442	6063.54	0	?	0	525	Calibration	-	243	2.4439	5277.94	0	?
244	2.454	11559	0	?	0	525	Calibration	-	244	2.4543	19960.5	0	?	0	525	Calibration	-	244	2.4539	7456.56	0	?	0	525	Calibration	-	244	2.4539	7728.79	0	?	0	525	Calibration	-	244	2.4542	6081.26	0	?	0	525	Calibration	-	244	2.4539	5281.74	0	?
245	2.464	11597.7	0	?	0	525	Calibration	-	245	2.4643	19907.6	0	?	0	525	Calibration	-	245	2.4639	7430.67	0	?	0	525	Calibration	-	245	2.4639	7723.01	0	?	0	525	Calibration	-	245	2.4642	6099.13	0	?	0	525	Calibration	-	245	2.4639	5288.95	0	?
246	2.474	11633.1	0	?	0	525	Calibration	-	246	2.4744	19939.5	0	?	0	525	Calibration	-	246	2.4739	7454.88	0	?	0	525	Calibration	-	246	2.4739	7746.59	0	?	0	525	Calibration	-	246	2.4742	6102.84	0	?	0	525	Calibration	-	246	2.4739	5267.47	0	?
247	2.484	11631.9	0	?	0	525	Calibration	-	247	2.4844	19989	0	?	0	525	Calibration	-	247	2.4839	7443.91	0	?	0	525	Calibration	-	247	2.4839	7750.07	0	?	0	525	Calibration	-	247	2.4843	6085.24	0	?	0	525	Calibration	-	247	2.4839	5274.51	0	?
248	2.4941	11674.4	0	?	0	525	Calibration	-	248	2.4944	19977.3	0	?	0	525	Calibration	-	248	2.4939	7446.13	0	?	0	525	Calibration	-	248	2.4939	7776.88	0	?	0	525	Calibration	-	248	2.4943	6102.7	0	?	0	525	Calibration	-	248	2.4939	5255.84	0	?
249	2.5041	11606.5	0	?	0	525	Calibration	-	249	2.5044	19977.3	0	?	0	525	Calibration	-	249	2.504	7455.44	0	?	0	525	Calibration	-	249	2.504	7767.49	0	?	0	525	Calibration	-	249	2.5043	6097.86	0	?	0	525	Calibration	-	249	2.504	5276.41	0	?
250	2.5141	11476.7	0	?	0	525	Calibration	-	250	2.5144	19985.1	0	?	0	525	Calibration	-	250	2.514	7458.53	0	?	0	525	Calibration	-	250	2.514	7780.04	0	?	0	525	Calibration	-	250	2.5143	6105.57	0	?	0	525	Calibration	-	250	2.514	5263.64	0	?
251	2.5241	11515.2	0	?	0	525	Calibration	-	251	2.5244	19985	0	?	0	525	Calibration	-	251	2.524	7456.96	0	?	0	525	Calibration	-	251	2.524	7756.04	0	?	0	525	Calibration	-	251	2.5243	6091.35	0	?	0	525	Calibration	-	251	2.524	5292.47	0	?
252	2.5341	11522	0	?	0	525	Calibration	-	252	2.5345	19950	0	?	0	525	Calibration	-	252	2.534	7462.97	0	?	0	525	Calibration	-	252	2.534	7721.6	0	?	0	525	Calibration	-	252	2.5343	6092.69	0	?	0	525	Calibration	-	252	2.534	5268.47	0	?
253	2.5441	11547.3	0	?	0	525	Calibration	-	253	2.5445	19947.8	0	?	0	525	Calibration	-	253	2.544	7453.05	0	?	0	525	Calibration	-	253	2.544	7694.13	0	?	0	525	Calibration	-	253	2.5444	6086.55	0	?	0	525	Calibration	-	253	2.544	5261.43	0	?
254	2.5542	11548.2	0	?	0	525	Calibration	-	254	2.5545	19909.8	0	?	0	525	Calibration	-	254	2.554	7439.66	0	?	0	525	Calibration	-	254	2.554	7669.75	0	?	0	525	Calibration	-	254	2.5544	6083.52	0	?	0	525	Calibration	-	254	2.554	5253.13	0	?
255	2.5642	11625.7	0	?	0	525	Calibration	-	255	2.5645	19907.3	0	?	0	525	Calibration	-	255	2.5641	7439.23	0	?	0	525	Calibration	-	255	2.5641	7668.43	0	?	0	525	Calibration	-	255	2.5644	6082.61	0	?	0	525	Calibration	-	255	2.5641	5265.64	0	?
256	2.5742	11644.5	0	?	0	525	Calibration	-	256	2.5745	19959.3	0	?	0	525	Calibration	-	256	2.5741	7443.63	0	?	0	525	Calibration	-	256	2.5741	7666.48	0	?	0	525	Calibration	-	256	2.5744	6104.29	0	?	0	525	Calibration	-	256	2.5741	5272.64	0	?
257	2.5842	11645	0	?	0	525	Calibration	-	257	2.5845	19958.3	0	?	0	525	Calibration	-	257	2.5841	7441.18	0	?	0	525	Calibration	-	257	2.5841	7664.31	0	?	0	525	Calibration	-	257	2.5844	6097.2	0	?	0	525	Calibration	-	257	2.5841	5268.69	0	?
258	2.5942	11670.6	0	?	0	525	Calibration	-	258	2.5946	20042.2	0	?	0	525	Calibration	-	258	2.5941	7459.43	0	?	0	525	Calibration	-	258	2.5941	7682.61	0	?	0	525	Calibration	-	258	2.5944	6105.39	0	?	0	525	Calibration	-	258	2.5941	5290	0	?
259	2.6042	11672.1	0	?	0	525	Calibration	-	259	2.6046	19995	0	?	0	525	Calibration	-	259	2.6041	7457.46	0	?	0	525	Calibration	-	259	2.6041	7691.84	0	?	0	525	Calibration	-	259	2.6045	6103.77	0	?	0	525	Calibration	-	259	2.6041	5270.09	0	?
260	2.6143	11702.3	0	?	0	525	Calibration	-	260	2.6146	19986.3	0	?	0	525	Calibration	-	260	2.6141	7459.25	0	?	0	525	Calibration	-	260	2.6141	7689.38	0	?	0	525	Calibration	-	260	2.6145	6092.08	0	?	0	525	Calibration	-	260	2.6141	5269.04	0	?
261	2.6243	11696.8	0	?	0	525	Calibration	-	261	2.6246	19905.2	0	?	0	525	Calibration	-	261	2.6242	7441.74	0	?	0	525	Calibration	-	261	2.6242	7693.9	0	?	0	525	Calibration	-	261	2.6245	6081.58	0	?	0	525	Calibration	-	261	2.6242	5266.84	0	?
262	2.6343	11686.7	0	?	0	525	Calibration	-	262	2.6346	19935.7	0	?	0	525	Calibration	-	262	2.6342	7450.92	0	?	0	525	Calibration	-	262	2.6342	7709.8	0	?	0	525	Calibration	-	262	2.6345	6088.44	0	?	0	525	Calibration	-	262	2.6342	5250.31	0	?
263	2.6443	11600.6	0	?	0	525	Calibration	-	263	2.6447	19912.4	0	?	0	525	Calibration	-	263	2.6442	7443.93	0	?	0	525	Calibration	-	263	2.6442	7739.01	0	?	0	525	Calibration	-	263	2.6445	6075.63	0	?	0	525	Calibration	-	263	2.6442	5249.99	0	?
264	2.6543	11549.8	0	?	0	525	Calibration	-	264	2.6547	19896	0	?	0	525	Calibration	-	264	2.6542	7449.49	0	?	0	525	Calibration	-	264	2.6542	7727.63	0	?	0	525	Calibration	-	264	2.6546	6060.49	0	?	0	525	Calibration	-	264	2.6542	5243.22	0	?
265	2.6643	11526.2	0	?	0	525	Calibration	-	265	2.6647	19891.1	0	?	0	525	Calibration	-	265	2.6642	7443.98	0	?	0	525	Calibration	-	265	2.6642	7721.87	0	?	0	525	Calibration	-	265	2.6646	6095.13	0	?	0	525	Calibration	-	265	2.6642	5264.49	0	?
266	2.6744	11510.1	0	?	0	525	Calibration	-	266	2.6747	19850	0	?	0	525	Calibration	-	266	2.6742	7442.14	0	?	0	525	Calibration	-	266	2.6742	7708	0	?	0	525	Calibration	-	266	2.6746	6064.53	0	?	0	525	Calibration	-	266	2.6742	5261.32	0	?
267	2.6844	11471.1	0	?	0	525	Calibration	-	267	2.6847	19833.1	0	?	0	525	Calibration	-	267	2.6843	7447.24	0	?	0	525	Calibration	-	267	2.6843	7704.98	0	?	0	525	Calibration	-	267	2.6846	6074.74	0	?	0	525	Calibration	-	267	2.6843	5257.58	0	?
268	2.6944	11471	0	?	0	525	Calibration	-	268	2.6947	19845.5	0	?	0	525	Calibration	-	268	2.6943	7426.37	0	?	0	525	Calibration	-	268	2.6943	7695.63	0	?	0	525	Calibration	-	268	2.6946	6092.94	0	?	0	525	Calibration	-	268	2.6943	5245.28	0	?
269	2.7044	11514.3	0	?	0	525	Calibration	-	269	2.7048	19841.5	0	?	0	525	Calibration	-	269	2.7043	7412.38	0	?	0	525	Calibration	-	269	2.7043	7712.23	0	?	0	525	Calibration	-	269	2.7046	6082.07	0	?	0	525	Calibration	-	269	2.7043	5265.34	0	?
270	2.7144	11529.8	0	?	0	525	Calibration	-	270	2.7148	19839.4	0	?	0	525	Calibration	-	270	2.7143	7408.94	0	?	0	525	Calibration	-	270	2.7143	7691.51	0	?	0	525	Calibration	-	270	2.7147	6084.72	0	?	0	525	Calibration	-	270	2.7143	5242.89	0	?
271	2.7244	11613.2	0	?	0	525	Calibration	-	271	2.7248	19852.8	0	?	0	525	Calibration	-	271	2.7243	7418.02	0	?	0	525	Calibration	-	271	2.7243	7701.25	0	?	0	525	Calibration	-	271	2.7247	6084.24	0	?	0	525	Calibration	-	271	2.7243	5256.58	0	?
272	2.7344	11501.7	0	?	0	525	Calibration	-	272	2.7348	19842.9	0	?	0	525	Calibration	-	272	2.7343	7447.81	0	?	0	525	Calibration	-	272	2.7343	7702.09	0	?	0	525	Calibration	-	272	2.7347	6069.57	0	?	0	525	Calibration	-	272	2.7343	5257.26	0	?
273	2.7445	11482.4	0	?	0	525	Calibration	-	273	2.7448	19839.6	0	?	0	525	Calibration	-	273	2.7443	7447.14	0	?	0	525	Calibration	-	273	2.7443	7682.1	0	?	0	525	Calibration	-	273	2.7447	6071.13	0	?	0	525	Calibration	-	273	2.7443	5239.37	0	?
274	2.7545	11618.9	0	?	0	525	Calibration	-	274	2.7548	19804.2	0	?	0	525	Calibration	-	274	2.7544	7436.93	0	?	0	525	Calibration	-	274	2.7544	7684.02	0	?	0	525	Calibration	-	274	2.7547	6058.88	0	?	0	525	Calibration	-	274	2.7544	5261.46	0	?
275	2.7645	11789.7	0	?	0	525	Calibration	-	275	2.7649	19786.9	0	?	0	525	Calibration	-	275	2.7644	7429.54	0	?	0	525	Calibration	-	275	2.7644	7662.81	0	?	0	525	Calibration	-	275	2.7647	6089.59	0	?	0	525	Calibration	-	275	2.7644	5273.24	0	?
276	2.7745	11938.1	0	?	0	525	Calibration	-	276	2.7749	19797.2	0	?	0	525	Calibration	-	276	2.7744	7426.31	0	?	0	525	Calibration	-	276	2.7744	7667.37	0	?	0	525	Calibration	-	276	2.7748	6088.74	0	?	0	525	Calibration	-	276	2.7744	5271.61	0	?
277	2.7845	12017.7	0	?	0	525	Calibration	-	277	2.7849	19821.6	0	?	0	525	Calibration	-	277	2.7844	7415.77	0	?	0	525	Calibration	-	277	2.7844	7679.81	0	?	0	525	Calibration	-	277	2.7848	6092.96	0	?	0	525	Calibration	-	277	2.7844	5273.45	0	?
278	2.7945	12051.9	0	?	0	525	Calibration	-	278	2.7949	19830.4	0	?	0	525	Calibration	-	278	2.7944	7435.81	0	?	0	525	Calibration	-	278	2.7944	7674.73	0	?	0	525	Calibration	-	278	2.7948	6080.87	0	?	0	525	Calibration	-	278	2.7944	5261.8	0	?
279	2.8046	12080.1	0	?	0	525	Calibration	-	279	2.8049	19860.5	0	?	0	525	Calibration	-	279	2.8044	7416.94	0	?	0	525	Calibration	-	279	2.8044	7681.5	0	?	0	525	Calibration	-	279	2.8048	6079.66	0	?	0	525	Calibration	-	279	2.8044	5250.2	0	?
280	2.8146	12082	0	?	0	525	Calibration	-	280	2.815	19868.6	0	?	0	525	Calibration	-	280	2.8145	7422.34	0	?	0	525	Calibration	-	280	2.8145	7687.37	0	?	0	525	Calibration	-	280	2.8148	6091.88	0	?	0	525	Calibration	-	280	2.8145	5252.38	0	?
281	2.8246	12121.1	0	?	0	525	Calibration	-	281	2.825	19887.6	0	?	0	525	Calibration	-	281	2.8245	7433.97	0	?	0	525	Calibration	-	281	2.8245	7679.06	0	?	0	525	Calibration	-	281	2.8248	6075.05	0	?	0	525	Calibration	-	281	2.8245	5249.23	0	?
282	2.8346	11987.5	0	?	0	525	Calibration	-	282	2.835	19888.4	0	?	0	525	Calibration	-	282	2.8345	7425.33	0	?	0	525	Calibration	-	282	2.8345	7694.41	0	?	0	525	Calibration	-	282	2.8349	6093.11	0	?	0	525	Calibration	-	282	2.8345	5267.04	0	?
283	2.8446	11766.4	0	?	0	525	Calibration	-	283	2.845	19957.6	0	?	0	525	Calibration	-	283	2.8445	7427.4	0	?	0	525	Calibration	-	283	2.8445	7728.15	0	?	0	525	Calibration	-	283	2.8449	6083.18	0	?	0	525	Calibration	-	283	2.8445	5247.62	0	?
284	2.8546	11635.3	0	?	0	525	Calibration	-	284	2.855	19969.9	0	?	0	525	Calibration	-	284	2.8545	7434.41	0	?	0	525	Calibration	-	284	2.8545	7715.63	0	?	0	525	Calibration	-	284	2.8549	6070.9	0	?	0	525	Calibration	-	284	2.8545	5257.58	0	?
285	2.8647	11554.5	0	?	0	525	Calibration	-	285	2.865	19944.5	0	?	0	525	Calibration	-	285	2.8645	7421.6	0	?	0	525	Calibration	-	285	2.8645	7716.63	0	?	0	525	Calibration	-	285	2.8649	6083.68	0	?	0	525	Calibration	-	285	2.8645	5248.8	0	?
286	2.8747	11486.9	0	?	0	525	Calibration	-	286	2.8751	19992.6	0	?	0	525	Calibration	-	286	2.8746	7426.92	0	?	0	525	Calibration	-	286	2.8746	7711.56	0	?	0	525	Calibration	-	286	2.8749	6104.24	0	?	0	525	Calibration	-	286	2.8746	5266.84	0	?
287	2.8847	11473.8	0	?	0	525	Calibration	-	287	2.8851	19975.1	0	?	0	525	Calibration	-	287	2.8846	7423.05	0	?	0	525	Calibration	-	287	2.8846	7693.63	0	?	0	525	Calibration	-	287	2.8849	6082.81	0	?	0	525	Calibration	-	287	2.8846	5264.64	0	?
288	2.8947	11427.9	0	?	0	525	Calibration	-	288	2.8951	20023.6	0	?	0	525	Calibration	-	288	2.8946	7426.77	0	?	0	525	Calibration	-	288	2.8946	7678.25	0	?	0	525	Calibration	-	288	2.895	6078.14	0	?	0	525	Calibration	-	288	2.8946	5264.81	0	?
289	2.9047	11344.5	0	?	0	525	Calibration	-	289	2.9051	20032.7	0	?	0	525	Calibration	-	289	2.9046	7426.11	0	?	0	525	Calibration	-	289	2.9046	7668.44	0	?	0	525	Calibration	-	289	2.905	6097.72	0	?	0	525	Calibration	-	289	2.9046	5251.34	0	?
290	2.9147	11259.2	0	?	0	525	Calibration	-	290	2.9151	20017	0	?	0	525	Calibration	-	290	2.9146	7427.93	0	?	0	525	Calibration	-	290	2.9146	7666.39	0	?	0	525	Calibration	-	290	2.915	6086.82	0	?	0	525	Calibration	-	290	2.9146	5245.89	0	?
291	2.9248	11257	0	?	0	525	Calibration	-	291	2.9251	19994.6	0	?	0	525	Calibration	-	291	2.9246	7420.92	0	?	0	525	Calibration	-	291	2.9246	7660.51	0	?	0	525	Calibration	-	291	2.925	6072.71	0	?	0	525	Calibration	-	291	2.9246	5254.92	0	?
292	2.9348	11377.2	0	?	0	525	Calibration	-	292	2.9352	19993	0	?	0	525	Calibration	-	292	2.9346	7417.63	0	?	0	525	Calibration	-	292	2.9346	7659.12	0	?	0	525	Calibration	-	292	2.935	6064.16	0	?	0	525	Calibration	-	292	2.9346	5240.93	0	?
293	2.9448	11492.4	0	?	0	525	Calibration	-	293	2.9452	19978.7	0	?	0	525	Calibration	-	293	2.9447	7412.17	0	?	0	525	Calibration	-	293	2.9447	7661.94	0	?	0	525	Calibration	-	293	2.9451	6058.38	0	?	0	525	Calibration	-	293	2.9447	5242.08	0	?
294	2.9548	11541	0	?	0	525	Calibration	-	294	2.9552	19933.2	0	?	0	525	Calibration	-	294	2.9547	7413.45	0	?	0	525	Calibration	-	294	2.9547	7668.12	0	?	0	525	Calibration	-	294	2.9551	6061.6	0	?	0	525	Calibration	-	294	2.9547	5247.12	0	?
295	2.9648	11539.5	0	?	0	525	Calibration	-	295	2.9652	19964	0	?	0	525	Calibration	-	295	2.9647	7416.05	0	?	0	525	Calibration	-	295	2.9647	7653.04	0	?	0	525	Calibration	-	295	2.9651	6073.38	0	?	0	525	Calibration	-	295	2.9647	5235.39	0	?
296	2.9748	11334	0	?	0	525	Calibration	-	296	2.9752	19962	0	?	0	525	Calibration	-	296	2.9747	7428.75	0	?	0	525	Calibration	-	296	2.9747	7627.44	0	?	0	525	Calibration	-	296	2.9751	6079.4	0	?	0	525	Calibration	-	296	2.9747	5232.42	0	?
297	2.9849	11234	0	?	0	525	Calibration	-	297	2.9853	19934.3	0	?	0	525	Calibration	-	297	2.9847	7414.75	0	?	0	525	Calibration	-	297	2.9847	7612.53	0	?	0	525	Calibration	-	297	2.9851	6084.2	0	?	0	525	Calibration	-	297	2.9847	5236.94	0	?
298	2.9949	11198.8	0	?	0	525	Calibration	-	298	2.9953	19846.4	0	?	0	525	Calibration	-	298	2.9947	7410.89	0	?	0	525	Calibration	-	298	2.9947	7610.63	0	?	0	525	Calibration	-	298	2.9951	6066.76	0	?	0	525	Calibration	-	298	2.9947	5255.69	0	?
299	3.0049	11237.8	0	?	0	525	Calibration	-	299	3.0053	19843.4	0	?	0	525	Calibration	-	299	3.0048	7400.71	0	?	0	525	Calibration	-	299	3.0048	7606.48	0	?	0	525	Calibration	-	299	3.0052	6047.38	0	?	0	525	Calibration	-	299	3.0048	5245.34	0	?
300	3.0149	11315.5	0	?	0	525	Calibration	-	300	3.0153	19831.4	0	?	0	525	Calibration	-	300	3.0148	7392.99	0	?	0	525	Calibration	-	300	3.0148	7616.95	0	?	0	525	Calibration	-	300	3.0152	6069.86	0	?	0	525	Calibration	-	300	3.0148	5246.95	0	?
301	3.0249	11322.3	0	?	0	525	Calibration	-	301	3.0253	19785	0	?	0	525	Calibration	-	301	3.0248	7390.24	0	?	0	525	Calibration	-	301	3.0248	7606.69	0	?	0	525	Calibration	-	301	3.0252	6053.14	0	?	0	525	Calibration	-	301	3.0248	5231.77	0	?
302	3.0349	11431.5	0	?	0	525	Calibration	-	302	3.0353	19830.5	0	?	0	525	Calibration	-	302	3.0348	7387.85	0	?	0	525	Calibration	-	302	3.0348	7597.32	0	?	0	525	Calibration	-	302	3.0352	6072.45	0	?	0	525	Calibration	-	302	3.0348	5237.31	0	?
303	3.045	11541.3	0	?	0	525	Calibration	-	303	3.0454	19860	0	?	0	525	Calibration	-	303	3.0448	7393.59	0	?	0	525	Calibration	-	303	3.0448	7604.15	0	?	0	525	Calibration	-	303	3.0452	6084.94	0	?	0	525	Calibration	-	303	3.0448	5248.64	0	?
304	3.055	11707.6	0	?	0	525	Calibration	-	304	3.0554	19889.6	0	?	0	525	Calibration	-	304	3.0548	7392.95	0	?	0	525	Calibration	-	304	3.0548	7605.2	0	?	0	525	Calibration	-	304	3.0552	6077.57	0	?	0	525	Calibration	-	304	3.0548	5230.96	0	?
305	3.065	11818.4	0	?	0	525	Calibration	-	305	3.0654	19923.2	0	?	0	525	Calibration	-	305	3.0649	7395.53	0	?	0	525	Calibration	-	305	3.0649	7599.69	0	?	0	525	Calibration	-	305	3.0653	6042.87	0	?	0	525	Calibration	-	305	3.0649	5235.78	0	?
306	3.075	11936.3	0	?	0	525	Calibration	-	306	3.0754	19966.3	0	?	0	525	Calibration	-	306	3.0749	7382.06	0	?	0	525	Calibration	-	306	3.0749	7618.27	0	?	0	525	Calibration	-	306	3.0753	6066.17	0	?	0	525	Calibration	-	306	3.0749	5229.88	0	?
307	3.085	11998.6	0	?	0	525	Calibration	-	307	3.0854	19994.5	0	?	0	525	Calibration	-	307	3.0849	7401.91	0	?	0	525	Calibration	-	307	3.0849	7613.5	0	?	0	525	Calibration	-	307	3.0853	6049.95	0	?	0	525	Calibration	-	307	3.0849	5232.86	0	?
308	3.095	12067.1	0	?	0	525	Calibration	-	308	3.0954	19924.3	0	?	0	525	Calibration	-	308	3.0949	7388.09	0	?	0	525	Calibration	-	308	3.0949	7620.08	0	?	0	525	Calibration	-	308	3.0953	6042.16	0	?	0	525	Calibration	-	308	3.0949	5230.61	0	?
309	3.1051	12107.2	0	?	0	525	Calibration	-	309	3.1055	19913.2	0	?	0	525	Calibration	-	309	3.1049	7393.09	0	?	0	525	Calibration	-	309	3.1049	7630.08	0	?	0	525	Calibration	-	309	3.1053	6056.18	0	?	0	525	Calibration	-	309	3.1049	5222.91	0	?
310	3.1151	12081.8	0	?	0	525	Calibration	-	310	3.1155	19849.4	0	?	0	525	Calibration	-	310	3.1149	7394.47	0	?	0	525	Calibration	-	310	3.1149	7635.57	0	?	0	525	Calibration	-	310	3.1153	6040.34	0	?	0	525	Calibration	-	310	3.1149	5230.84	0	?
311	3.1251	12085.2	0	?	0	525	Calibration	-	311	3.1255	19860.4	0	?	0	525	Calibration	-	311	3.1249	7393.91	0	?	0	525	Calibration	-	311	3.1249	7660.47	0	?	0	525	Calibration	-	311	3.1254	6046.58	0	?	0	525	Calibration	-	311	3.1249	5237.83	0	?
312	3.1351	12123.6	0	?	0	525	Calibration	-	312	3.1355	19867.7	0	?	0	525	Calibration	-	312	3.135	7391.54	0	?	0	525	Calibration	-	312	3.135	7690.17	0	?	0	525	Calibration	-	312	3.1354	6067.77	0	?	0	525	Calibration	-	312	3.135	5245.96	0	?
313	3.1451	11905.3	0	?	0	525	Calibration	-	313	3.1455	19920.5	0	?	0	525	Calibration	-	313	3.145	7404.94	0	?	0	525	Calibration	-	313	3.145	7669.33	0	?	0	525	Calibration	-	313	3.1454	6066.95	0	?	0	525	Calibration	-	313	3.145	5243.06	0	?
314	3.1551	11779.5	0	?	0	525	Calibration	-	314	3.1556	19934.4	0	?	0	525	Calibration	-	314	3.155	7406.41	0	?	0	525	Calibration	-	314	3.155	7649.94	0	?	0	525	Calibration	-	314	3.1554	6061.14	0	?	0	525	Calibration	-	314	3.155	5230.4	0	?
315	3.1652	11840.8	0	?	0	525	Calibration	-	315	3.1656	19948.2	0	?	0	525	Calibration	-	315	3.165	7410.19	0	?	0	525	Calibration	-	315	3.165	7626.35	0	?	0	525	Calibration	-	315	3.1654	6036.92	0	?	0	525	Calibration	-	315	3.165	5243.38	0	?
316	3.1752	11821	0	?	0	525	Calibration	-	316	3.1756	19945.3	0	?	0	525	Calibration	-	316	3.175	7425.42	0	?	0	525	Calibration	-	316	3.175	7615.67	0	?	0	525	Calibration	-	316	3.1754	6032.13	0	?	0	525	Calibration	-	316	3.175	5233.92	0	?
317	3.1852	11730.4	0	?	0	525	Calibration	-	317	3.1856	19953.8	0	?	0	525	Calibration	-	317	3.185	7411.25	0	?	0	525	Calibration	-	317	3.185	7631.34	0	?	0	525	Calibration	-	317	3.1855	6045.1	0	?	0	525	Calibration	-	317	3.185	5223.58	0	?
318	3.1952	11649	0	?	0	525	Calibration	-	318	3.1956	19906	0	?	0	525	Calibration	-	318	3.1951	7410.67	0	?	0	525	Calibration	-	318	3.1951	7627.43	0	?	0	525	Calibration	-	318	3.1955	6052.26	0	?	0	525	Calibration	-	318	3.1951	5220.34	0	?
319	3.2052	11674.7	0	?	0	525	Calibration	-	319	3.2056	19901.4	0	?	0	525	Calibration	-	319	3.2051	7419.42	0	?	0	525	Calibration	-	319	3.2051	7604.01	0	?	0	525	Calibration	-	319	3.2055	6037.82	0	?	0	525	Calibration	-	319	3.2051	5221.06	0	?
320	3.2152	11670.4	0	?	0	525	Calibration	-	320	3.2157	19861.1	0	?	0	525	Calibration	-	320	3.2151	7400.37	0	?	0	525	Calibration	-	320	3.2151	7598.03	0	?	0	525	Calibration	-	320	3.2155	6052.63	0	?	0	525	Calibration	-	320	3.2151	5231.42	0	?
321	3.2252	11702.2	0	?	0	525	Calibration	-	321	3.2257	19891.4	0	?	0	525	Calibration	-	321	3.2251	7405.78	0	?	0	525	Calibration	-	321	3.2251	7607.53	0	?	0	525	Calibration	-	321	3.2255	6060.82	0	?	0	525	Calibration	-	321	3.2251	5238.82	0	?
322	3.2353	11543.5	0	?	0	525	Calibration	-	322	3.2357	19869.3	0	?	0	525	Calibration	-	322	3.2351	7418.15	0	?	0	525	Calibration	-	322	3.2351	7612.54	0	?	0	525	Calibration	-	322	3.2355	6058.3	0	?	0	525	Calibration	-	322	3.2351	5226.81	0	?
323	3.2453	11552.2	0	?	0	525	Calibration	-	323	3.2457	19873.9	0	?	0	525	Calibration	-	323	3.2451	7415.69	0	?	0	525	Calibration	-	323	3.2451	7612.41	0	?	0	525	Calibration	-	323	3.2456	6036.39	0	?	0	525	Calibration	-	323	3.2451	5218.54	0	?
324	3.2553	11519.7	0	?	0	525	Calibration	-	324	3.2557	19839.4	0	?	0	525	Calibration	-	324	3.2552	7411.59	0	?	0	525	Calibration	-	324	3.2552	7620.33	0	?	0	525	Calibration	-	324	3.2556	6040.45	0	?	0	525	Calibration	-	324	3.2552	5246.72	0	?
325	3.2653	11472.7	0	?	0	525	Calibration	-	325	3.2657	19824.2	0	?	0	525	Calibration	-	325	3.2652	7407.31	0	?	0	525	Calibration	-	325	3.2652	7626.49	0	?	0	525	Calibration	-	325	3.2656	6044.47	0	?	0	525	Calibration	-	325	3.2652	5234.92	0	?
326	3.2753	11405.5	0	?	0	525	Calibration	-	326	3.2758	19843.6	0	?	0	525	Calibration	-	326	3.2752	7387.32	0	?	0	525	Calibration	-	326	3.2752	7651.32	0	?	0	525	Calibration	-	326	3.2756	6019.59	0	?	0	525	Calibration	-	326	3.2752	5237.47	0	?
327	3.2853	11476.3	0	?	0	525	Calibration	-	327	3.2858	19813.2	0	?	0	525	Calibration	-	327	3.2852	7394.57	0	?	0	525	Calibration	-	327	3.2852	7676.08	0	?	0	525	Calibration	-	327	3.2856	6044.01	0	?	0	525	Calibration	-	327	3.2852	5224.08	0	?
328	3.2954	11386.7	0	?	0	525	Calibration	-	328	3.2958	19835.4	0	?	0	525	Calibration	-	328	3.2952	7389.41	0	?	0	525	Calibration	-	328	3.2952	7647.42	0	?	0	525	Calibration	-	328	3.2957	6054.33	0	?	0	525	Calibration	-	328	3.2952	5239.17	0	?
329	3.3054	11303.4	0	?	0	525	Calibration	-	329	3.3058	19809.5	0	?	0	525	Calibration	-	329	3.3052	7391.69	0	?	0	525	Calibration	-	329	3.3052	7611.4	0	?	0	525	Calibration	-	329	3.3057	6039.63	0	?	0	525	Calibration	-	329	3.3052	5229.34	0	?
330	3.3154	11195.4	0	?	0	525	Calibration	-	330	3.3158	19823.3	0	?	0	525	Calibration	-	330	3.3152	7398.7	0	?	0	525	Calibration	-	330	3.3152	7603.32	0	?	0	525	Calibration	-	330	3.3157	6052.52	0	?	0	525	Calibration	-	330	3.3152	5244.03	0	?
331	3.3254	11250.6	0	?	0	525	Calibration	-	331	3.3259	19758.2	0	?	0	525	Calibration	-	331	3.3253	7391.54	0	?	0	525	Calibration	-	331	3.3253	7590.69	0	?	0	525	Calibration	-	331	3.3257	6045.63	0	?	0	525	Calibration	-	331	3.3253	5228.88	0	?
332	3.3354	11308.3	0	?	0	525	Calibration	-	332	3.3359	19785.6	0	?	0	525	Calibration	-	332	3.3353	7400.5	0	?	0	525	Calibration	-	332	3.3353	7575.56	0	?	0	525	Calibration	-	332	3.3357	6007.35	0	?	0	525	Calibration	-	332	3.3353	5242.02	0	?
333	3.3454	11366.8	0	?	0	525	Calibration	-	333	3.3459	19797	0	?	0	525	Calibration	-	333	3.3453	7387.93	0	?	0	525	Calibration	-	333	3.3453	7583.08	0	?	0	525	Calibration	-	333	3.3457	6042.69	0	?	0	525	Calibration	-	333	3.3453	5223.96	0	?
334	3.3555	11317	0	?	0	525	Calibration	-	334	3.3559	19803.5	0	?	0	525	Calibration	-	334	3.3553	7408.76	0	?	0	525	Calibration	-	334	3.3553	7585.26	0	?	0	525	Calibration	-	334	3.3558	6031.13	0	?	0	525	Calibration	-	334	3.3553	5230.66	0	?
335	3.3655	11424.4	0	?	0	525	Calibration	-	335	3.3659	19802.2	0	?	0	525	Calibration	-	335	3.3653	7378.91	0	?	0	525	Calibration	-	335	3.3653	7571.09	0	?	0	525	Calibration	-	335	3.3658	6053.01	0	?	0	525	Calibration	-	335	3.3653	5238.64	0	?
336	3.3755	11494.2	0	?	0	525	Calibration	-	336	3.3759	19796.6	0	?	0	525	Calibration	-	336	3.3753	7397.21	0	?	0	525	Calibration	-	336	3.3753	7565.6	0	?	0	525	Calibration	-	336	3.3758	6069.22	0	?	0	525	Calibration	-	336	3.3753	5226.09	0	?
337	3.3855	11457	0	?	0	525	Calibration	-	337	3.386	19766.7	0	?	0	525	Calibration	-	337	3.3854	7393.47	0	?	0	525	Calibration	-	337	3.3854	7567.66	0	?	0	525	Calibration	-	337	3.3858	6084.42	0	?	0	525	Calibration	-	337	3.3854	5229.48	0	?
338	3.3955	11421.3	0	?	0	525	Calibration	-	338	3.396	19708.8	0	?	0	525	Calibration	-	338	3.3954	7405.13	0	?	0	525	Calibration	-	338	3.3954	7613.3	0	?	0	525	Calibration	-	338	3.3958	6070.65	0	?	0	525	Calibration	-	338	3.3954	5205.04	0	?
339	3.4055	11430.1	0	?	0	525	Calibration	-	339	3.406	19712.2	0	?	0	525	Calibration	-	339	3.4054	7414.48	0	?	0	525	Calibration	-	339	3.4054	7626.83	0	?	0	525	Calibration	-	339	3.4058	6044.32	0	?	0	525	Calibration	-	339	3.4054	5227.02	0	?
340	3.4156	11420.7	0	?	0	525	Calibration	-	340	3.416	19721.6	0	?	0	525	Calibration	-	340	3.4154	7411.78	0	?	0	525	Calibration	-	340	3.4154	7627.4	0	?	0	525	Calibration	-	340	3.4159	6060.55	0	?	0	525	Calibration	-	340	3.4154	5216.54	0	?
341	3.4256	11458.9	0	?	0	525	Calibration	-	341	3.426	19741.3	0	?	0	525	Calibration	-	341	3.4254	7398.76	0	?	0	525	Calibration	-	341	3.4254	7620.49	0	?	0	525	Calibration	-	341	3.4259	6060.69	0	?	0	525	Calibration	-	341	3.4254	5198.77	0	?
342	3.4356	11519.4	0	?	0	525	Calibration	-	342	3.436	19769.2	0	?	0	525	Calibration	-	342	3.4354	7385.01	0	?	0	525	Calibration	-	342	3.4354	7626.41	0	?	0	525	Calibration	-	342	3.4359	6046.21	0	?	0	525	Calibration	-	342	3.4354	5215.63	0	?
343	3.4456	11566.6	0	?	0	525	Calibration	-	343	3.4461	19779.8	0	?	0	525	Calibration	-	343	3.4455	7389.49	0	?	0	525	Calibration	-	343	3.4455	7595.59	0	?	0	525	Calibration	-	343	3.4459	6062.73	0	?	0	525	Calibration	-	343	3.4455	5225.27	0	?
344	3.4556	11608.9	0	?	0	525	Calibration	-	344	3.4561	19755.9	0	?	0	525	Calibration	-	344	3.4555	7392.32	0	?	0	525	Calibration	-	344	3.4555	7575.28	0	?	0	525	Calibration	-	344	3.4559	6049.82	0	?	0	525	Calibration	-	344	3.4555	5227.91	0	?
345	3.4656	11853.5	0	?	0	525	Calibration	-	345	3.4661	19759.3	0	?	0	525	Calibration	-	345	3.4655	7388.82	0	?	0	525	Calibration	-	345	3.4655	7576.35	0	?	0	525	Calibration	-	345	3.4659	6061.32	0	?	0	525	Calibration	-	345	3.4655	5221.22	0	?
346	3.4757	12008.9	0	?	0	525	Calibration	-	346	3.4761	19749	0	?	0	525	Calibration	-	346	3.4755	7383.13	0	?	0	525	Calibration	-	346	3.4755	7575.44	0	?	0	525	Calibration	-	346	3.476	6047.52	0	?	0	525	Calibration	-	346	3.4755	5218.47	0	?
347	3.4857	12100.5	0	?	0	525	Calibration	-	347	3.4861	19769.7	0	?	0	525	Calibration	-	347	3.4855	7380.3	0	?	0	525	Calibration	-	347	3.4855	7578.31	0	?	0	525	Calibration	-	347	3.486	6046.62	0	?	0	525	Calibration	-	347	3.4855	5229.89	0	?
348	3.4957	12106.1	0	?	0	525	Calibration	-	348	3.4961	19787	0	?	0	525	Calibration	-	348	3.4955	7381.45	0	?	0	525	Calibration	-	348	3.4955	7583.63	0	?	0	525	Calibration	-	348	3.496	6023.74	0	?	0	525	Calibration	-	348	3.4955	5207.99	0	?
349	3.5057	11841.7	0	?	0	525	Calibration	-	349	3.5062	19845.4	0	?	0	525	Calibration	-	349	3.5056	7375.19	0	?	0	525	Calibration	-	349	3.5056	7565.98	0	?	0	525	Calibration	-	349	3.506	6032.47	0	?	0	525	Calibration	-	349	3.5056	5227.17	0	?
350	3.5157	11849.1	0	?	0	525	Calibration	-	350	3.5162	19791.1	0	?	0	525	Calibration	-	350	3.5156	7381.07	0	?	0	525	Calibration	-	350	3.5156	7566.75	0	?	0	525	Calibration	-	350	3.516	6042.71	0	?	0	525	Calibration	-	350	3.5156	5210.58	0	?
351	3.5257	11800.5	0	?	0	525	Calibration	-	351	3.5262	19762.6	0	?	0	525	Calibration	-	351	3.5256	7386.32	0	?	0	525	Calibration	-	351	3.5256	7583.93	0	?	0	525	Calibration	-	351	3.526	6026.89	0	?	0	525	Calibration	-	351	3.5256	5218	0	?
352	3.5358	11733.5	0	?	0	525	Calibration	-	352	3.5362	19738.1	0	?	0	525	Calibration	-	352	3.5356	7397.02	0	?	0	525	Calibration	-	352	3.5356	7544.15	0	?	0	525	Calibration	-	352	3.5361	6029.85	0	?	0	525	Calibration	-	352	3.5356	5223.25	0	?
353	3.5458	11835.8	0	?	0	525	Calibration	-	353	3.5462	19725.1	0	?	0	525	Calibration	-	353	3.5456	7386.35	0	?	0	525	Calibration	-	353	3.5456	7530.9	0	?	0	525	Calibration	-	353	3.5461	6009.29	0	?	0	525	Calibration	-	353	3.5456	5232.71	0	?
354	3.5558	11952	0	?	0	525	Calibration	-	354	3.5563	19740.5	0	?	0	525	Calibration	-	354	3.5556	7382.71	0	?	0	525	Calibration	-	354	3.5556	7537.48	0	?	0	525	Calibration	-	354	3.5561	6029.39	0	?	0	525	Calibration	-	354	3.5556	5245.69	0	?
355	3.5658	11937.8	0	?	0	525	Calibration	-	355	3.5663	19744	0	?	0	525	Calibration	-	355	3.5656	7388.79	0	?	0	525	Calibration	-	355	3.5656	7536.06	0	?	0	525	Calibration	-	355	3.5661	6012	0	?	0	525	Calibration	-	355	3.5656	5232.17	0	?
356	3.5758	11612.1	0	?	0	525	Calibration	-	356	3.5763	19757.2	0	?	0	525	Calibration	-	356	3.5757	7392.28	0	?	0	525	Calibration	-	356	3.5757	7523.55	0	?	0	525	Calibration	-	356	3.5761	6018.58	0	?	0	525	Calibration	-	356	3.5757	5221.6	0	?
357	3.5858	11463.2	0	?	0	525	Calibration	-	357	3.5863	19720.3	0	?	0	525	Calibration	-	357	3.5857	7398.1	0	?	0	525	Calibration	-	357	3.5857	7557.77	0	?	0	525	Calibration	-	357	3.5862	6012.23	0	?	0	525	Calibration	-	357	3.5857	5228.3	0	?
358	3.5959	11454.6	0	?	0	525	Calibration	-	358	3.5963	19743.3	0	?	0	525	Calibration	-	358	3.5957	7396.65	0	?	0	525	Calibration	-	358	3.5957	7555.21	0	?	0	525	Calibration	-	358	3.5962	6010.42	0	?	0	525	Calibration	-	358	3.5957	5218.69	0	?
359	3.6059	11479.1	0	?	0	525	Calibration	-	359	3.6063	19729.8	0	?	0	525	Calibration	-	359	3.6057	7393.61	0	?	0	525	Calibration	-	359	3.6057	7538.63	0	?	0	525	Calibration	-	359	3.6062	6009.22	0	?	0	525	Calibration	-	359	3.6057	5228.98	0	?
360	3.6159	11419.6	0	?	0	525	Calibration	-	360	3.6164	19748.8	0	?	0	525	Calibration	-	360	3.6157	7379.67	0	?	0	525	Calibration	-	360	3.6157	7531.72	0	?	0	525	Calibration	-	360	3.6162	6028.29	0	?	0	525	Calibration	-	360	3.6157	5222.38	0	?
361	3.6259	11385.4	0	?	0	525	Calibration	-	361	3.6264	19784.8	0	?	0	525	Calibration	-	361	3.6257	7349.12	0	?	0	525	Calibration	-	361	3.6257	7512.04	0	?	0	525	Calibration	-	361	3.6262	6034.9	0	?	0	525	Calibration	-	361	3.6257	5222.15	0	?
362	3.6359	11399.2	0	?	0	525	Calibration	-	362	3.6364	19803.7	0	?	0	525	Calibration	-	362	3.6358	7368.23	0	?	0	525	Calibration	-	362	3.6358	7530.86	0	?	0	525	Calibration	-	362	3.6362	6036.63	0	?	0	525	Calibration	-	362	3.6358	5220.98	0	?
363	3.6459	11458	0	?	0	525	Calibration	-	363	3.6464	19775.8	0	?	0	525	Calibration	-	363	3.6458	7369.04	0	?	0	525	Calibration	-	363	3.6458	7532.1	0	?	0	525	Calibration	-	363	3.6463	6019.69	0	?	0	525	Calibration	-	363	3.6458	5218.44	0	?
364	3.6559	11541	0	?	0	525	Calibration	-	364	3.6564	19812.5	0	?	0	525	Calibration	-	364	3.6558	7369.87	0	?	0	525	Calibration	-	364	3.6558	7518.58	0	?	0	525	Calibration	-	364	3.6563	6011.28	0	?	0	525	Calibration	-	364	3.6558	5206.7	0	?
365	3.666	11546.3	0	?	0	525	Calibration	-	365	3.6664	19815.9	0	?	0	525	Calibration	-	365	3.6658	7392.21	0	?	0	525	Calibration	-	365	3.6658	7522.75	0	?	0	525	Calibration	-	365	3.6663	6038.52	0	?	0	525	Calibration	-	365	3.6658	5221.41	0	?
366	3.676	11655.9	0	?	0	525	Calibration	-	366	3.6765	19797.8	0	?	0	525	Calibration	-	366	3.6758	7390.63	0	?	0	525	Calibration	-	366	3.6758	7529.47	0	?	0	525	Calibration	-	366	3.6763	6028.44	0	?	0	525	Calibration	-	366	3.6758	5216	0	?
367	3.686	11790	0	?	0	525	Calibration	-	367	3.6865	19782.2	0	?	0	525	Calibration	-	367	3.6858	7383.99	0	?	0	525	Calibration	-	367	3.6858	7532.12	0	?	0	525	Calibration	-	367	3.6863	6022.46	0	?	0	525	Calibration	-	367	3.6858	5214.01	0	?
368	3.696	11926.7	0	?	0	525	Calibration	-	368	3.6965	19790.3	0	?	0	525	Calibration	-	368	3.6959	7391.83	0	?	0	525	Calibration	-	368	3.6959	7509.14	0	?	0	525	Calibration	-	368	3.6963	6025.64	0	?	0	525	Calibration	-	368	3.6959	5210.61	0	?
369	3.706	11923.8	0	?	0	525	Calibration	-	369	3.7065	19786.7	0	?	0	525	Calibration	-	369	3.7059	7391.27	0	?	0	525	Calibration	-	369	3.7059	7513.9	0	?	0	525	Calibration	-	369	3.7064	6035.31	0	?	0	525	Calibration	-	369	3.7059	5227.58	0	?
370	3.716	11786.9	0	?	0	525	Calibration	-	370	3.7165	19779.2	0	?	0	525	Calibration	-	370	3.7159	7379.37	0	?	0	525	Calibration	-	370	3.7159	7496.58	0	?	0	525	Calibration	-	370	3.7164	6025.3	0	?	0	525	Calibration	-	370	3.7159	5226.97	0	?
371	3.7261	11642.5	0	?	0	525	Calibration	-	371	3.7266	19784.5	0	?	0	525	Calibration	-	371	3.7259	7368.12	0	?	0	525	Calibration	-	371	3.7259	7536.59	0	?	0	525	Calibration	-	371	3.7264	6008.45	0	?	0	525	Calibration	-	371	3.7259	5211.85	0	?
372	3.7361	11511.2	0	?	0	525	Calibration	-	372	3.7366	19777.3	0	?	0	525	Calibration	-	372	3.7359	7366.39	0	?	0	525	Calibration	-	372	3.7359	7533.27	0	?	0	525	Calibration	-	372	3.7364	6032.96	0	?	0	525	Calibration	-	372	3.7359	5222.31	0	?
373	3.7461	11441.4	0	?	0	525	Calibration	-	373	3.7466	19807.7	0	?	0	525	Calibration	-	373	3.7459	7377.2	0	?	0	525	Calibration	-	373	3.7459	7538	0	?	0	525	Calibration	-	373	3.7464	6028.75	0	?	0	525	Calibration	-	373	3.7459	5219.56	0	?
374	3.7561	11332.2	0	?	0	525	Calibration	-	374	3.7566	19783.5	0	?	0	525	Calibration	-	374	3.7559	7377.35	0	?	0	525	Calibration	-	374	3.7559	7529.67	0	?	0	525	Calibration	-	374	3.7564	6037.17	0	?	0	525	Calibration	-	374	3.7559	5223.49	0	?
375	3.7661	11300	0	?	0	525	Calibration	-	375	3.7666	19775.3	0	?	0	525	Calibration	-	375	3.766	7381.54	0	?	0	525	Calibration	-	375	3.766	7534.13	0	?	0	525	Calibration	-	375	3.7665	6013.97	0	?	0	525	Calibration	-	375	3.766	5209.33	0	?
376	3.7761	11390.3	0	?	0	525	Calibration	-	376	3.7766	19747.4	0	?	0	525	Calibration	-	376	3.776	7360.58	0	?	0	525	Calibration	-	376	3.776	7528.82	0	?	0	525	Calibration	-	376	3.7765	6000.66	0	?	0	525	Calibration	-	376	3.776	5220.02	0	?
377	3.7862	11406.9	0	?	0	525	Calibration	-	377	3.7867	19732.3	0	?	0	525	Calibration	-	377	3.786	7372.66	0	?	0	525	Calibration	-	377	3.786	7524.1	0	?	0	525	Calibration	-	377	3.7865	5985.91	0	?	0	525	Calibration	-	377	3.786	5189.61	0	?
378	3.7962	11427.9	0	?	0	525	Calibration	-	378	3.7967	19762	0	?	0	525	Calibration	-	378	3.796	7358.39	0	?	0	525	Calibration	-	378	3.796	7527.46	0	?	0	525	Calibration	-	378	3.7965	5953.8	0	?	0	525	Calibration	-	378	3.796	5210.79	0	?
379	3.8062	11499.7	0	?	0	525	Calibration	-	379	3.8067	19744	0	?	0	525	Calibration	-	379	3.806	7359.85	0	?	0	525	Calibration	-	379	3.806	7543.37	0	?	0	525	Calibration	-	379	3.8065	5993.13	0	?	0	525	Calibration	-	379	3.806	5206.91	0	?
380	3.8162	11506.8	0	?	0	525	Calibration	-	380	3.8167	19753.3	0	?	0	525	Calibration	-	380	3.816	7353.68	0	?	0	525	Calibration	-	380	3.816	7533.81	0	?	0	525	Calibration	-	380	3.8165	5996.27	0	?	0	525	Calibration	-	380	3.816	5233.39	0	?
381	3.8262	11545.5	0	?	0	525	Calibration	-	381	3.8267	19747.9	0	?	0	525	Calibration	-	381	3.8261	7355.83	0	?	0	525	Calibration	-	381	3.8261	7554.62	0	?	0	525	Calibration	-	381	3.8266	5997.69	0	?	0	525	Calibration	-	381	3.8261	5223.37	0	?
382	3.8362	11586	0	?	0	525	Calibration	-	382	3.8367	19777.8	0	?	0	525	Calibration	-	382	3.8361	7357.41	0	?	0	525	Calibration	-	382	3.8361	7553.43	0	?	0	525	Calibration	-	382	3.8366	5999.13	0	?	0	525	Calibration	-	382	3.8361	5207.28	0	?
383	3.8463	11600.1	0	?	0	525	Calibration	-	383	3.8468	19759.9	0	?	0	525	Calibration	-	383	3.8461	7338.73	0	?	0	525	Calibration	-	383	3.8461	7545.27	0	?	0	525	Calibration	-	383	3.8466	6015.79	0	?	0	525	Calibration	-	383	3.8461	5222.37	0	?
384	3.8563	11660.2	0	?	0	525	Calibration	-	384	3.8568	19812.8	0	?	0	525	Calibration	-	384	3.8561	7350.27	0	?	0	525	Calibration	-	384	3.8561	7524.23	0	?	0	525	Calibration	-	384	3.8566	6012.29	0	?	0	525	Calibration	-	384	3.8561	5210.38	0	?
385	3.8663	11773.6	0	?	0	525	Calibration	-	385	3.8668	19800.9	0	?	0	525	Calibration	-	385	3.8661	7378.69	0	?	0	525	Calibration	-	385	3.8661	7522.16	0	?	0	525	Calibration	-	385	3.8666	5984.04	0	?	0	525	Calibration	-	385	3.8661	5190.97	0	?
386	3.8763	11809.1	0	?	0	525	Calibration	-	386	3.8768	19787.7	0	?	0	525	Calibration	-	386	3.8761	7370.29	0	?	0	525	Calibration	-	386	3.8761	7514.67	0	?	0	525	Calibration	-	386	3.8766	6015.82	0	?	0	525	Calibration	-	386	3.8761	5216.39	0	?
387	3.8863	11627.7	0	?	0	525	Calibration	-	387	3.8868	19844.2	0	?	0	525	Calibration	-	387	3.8862	7351.51	0	?	0	525	Calibration	-	387	3.8862	7495.18	0	?	0	525	Calibration	-	387	3.8867	5993.44	0	?	0	525	Calibration	-	387	3.8862	5227.13	0	?
388	3.8963	11707	0	?	0	525	Calibration	-	388	3.8969	19879.2	0	?	0	525	Calibration	-	388	3.8962	7350.31	0	?	0	525	Calibration	-	388	3.8962	7482.21	0	?	0	525	Calibration	-	388	3.8967	5998.65	0	?	0	525	Calibration	-	388	3.8962	5206.24	0	?
389	3.9064	11807.3	0	?	0	525	Calibration	-	389	3.9069	19861.6	0	?	0	525	Calibration	-	389	3.9062	7368.32	0	?	0	525	Calibration	-	389	3.9062	7483.84	0	?	0	525	Calibration	-	389	3.9067	6018.34	0	?	0	525	Calibration	-	389	3.9062	5217.03	0	?
390	3.9164	11765.6	0	?	0	525	Calibration	-	390	3.9169	19895	0	?	0	525	Calibration	-	390	3.9162	7375.54	0	?	0	525	Calibration	-	390	3.9162	7474.35	0	?	0	525	Calibration	-	390	3.9167	6009.41	0	?	0	525	Calibration	-	390	3.9162	5194.08	0	?
391	3.9264	11769.3	0	?	0	525	Calibration	-	391	3.9269	19859	0	?	0	525	Calibration	-	391	3.9262	7369.3	0	?	0	525	Calibration	-	391	3.9262	7485.28	0	?	0	525	Calibration	-	391	3.9267	6029.16	0	?	0	525	Calibration	-	391	3.9262	5208.89	0	?
392	3.9364	11750.4	0	?	0	525	Calibration	-	392	3.9369	19909.2	0	?	0	525	Calibration	-	392	3.9362	7360.78	0	?	0	525	Calibration	-	392	3.9362	7488.39	0	?	0	525	Calibration	-	392	3.9368	6026.75	0	?	0	525	Calibration	-	392	3.9362	5197.08	0	?
393	3.9464	11696.8	0	?	0	525	Calibration	-	393	3.9469	19883.1	0	?	0	525	Calibration	-	393	3.9462	7352.38	0	?	0	525	Calibration	-	393	3.9462	7494.45	0	?	0	525	Calibration	-	393	3.9468	6006.72	0	?	0	525	Calibration	-	393	3.9462	5213.17	0	?
394	3.9564	11732.1	0	?	0	525	Calibration	-	394	3.957	19848.8	0	?	0	525	Calibration	-	394	3.9563	7340.17	0	?	0	525	Calibration	-	394	3.9563	7496.33	0	?	0	525	Calibration	-	394	3.9568	6013.73	0	?	0	525	Calibration	-	394	3.9563	5207.28	0	?
395	3.9665	11707.3	0	?	0	525	Calibration	-	395	3.967	19855	0	?	0	525	Calibration	-	395	3.9663	7366.84	0	?	0	525	Calibration	-	395	3.9663	7500.69	0	?	0	525	Calibration	-	395	3.9668	5994.46	0	?	0	525	Calibration	-	395	3.9663	5209.58	0	?
396	3.9765	11710.8	0	?	0	525	Calibration	-	396	3.977	19822.3	0	?	0	525	Calibration	-	396	3.9763	7344.92	0	?	0	525	Calibration	-	396	3.9763	7509.4	0	?	0	525	Calibration	-	396	3.9768	6011.18	0	?	0	525	Calibration	-	396	3.9763	5219.36	0	?
397	3.9865	11665.5	0	?	0	525	Calibration	-	397	3.987	19849.4	0	?	0	525	Calibration	-	397	3.9863	7353.45	0	?	0	525	Calibration	-	397	3.9863	7512.39	0	?	0	525	Calibration	-	397	3.9868	6008.89	0	?	0	525	Calibration	-	397	3.9863	5229.26	0	?
398	3.9965	11523.2	0	?	0	525	Calibration	-	398	3.997	19800.2	0	?	0	525	Calibration	-	398	3.9963	7344.68	0	?	0	525	Calibration	-	398	3.9963	7521.81	0	?	0	525	Calibration	-	398	3.9969	6014.85	0	?	0	525	Calibration	-	398	3.9963	5197.62	0	?
399	4.0065	11391.1	0	?	0	525	Calibration	-	399	4.007	19759.8	0	?	0	525	Calibration	-	399	4.0063	7334.48	0	?	0	525	Calibration	-	399	4.0063	7521.12	0	?	0	525	Calibration	-	399	4.0069	6036.38	0	?	0	525	Calibration	-	399	4.0063	5205.52	0	?
400	4.0165	11346.6	0	?	0	525	Calibration	-	400	4.0171	19701.9	0	?	0	525	Calibration	-	400	4.0164	7357.89	0	?	0	525	Calibration	-	400	4.0164	7529.25	0	?	0	525	Calibration	-	400	4.0169	6007.25	0	?	0	525	Calibration	-	400	4.0164	5194.11	0	?
401	4.0266	11271.3	0	?	0	525	Calibration	-	401	4.0271	19676.2	0	?	0	525	Calibration	-	401	4.0264	7352.13	0	?	0	525	Calibration	-	401	4.0264	7511.29	0	?	0	525	Calibration	-	401	4.0269	6026.42	0	?	0	525	Calibration	-	401	4.0264	5213.36	0	?
402	4.0366	11268.7	0	?	0	525	Calibration	-	402	4.0371	19697.2	0	?	0	525	Calibration	-	402	4.0364	7359.23	0	?	0	525	Calibration	-	402	4.0364	7497.99	0	?	0	525	Calibration	-	402	4.0369	6061.26	0	?	0	525	Calibration	-	402	4.0364	5194.93	0	?
403	4.0466	11250.9	0	?	0	525	Calibration	-	403	4.0471	19730.2	0	?	0	525	Calibration	-	403	4.0464	7356.61	0	?	0	525	Calibration	-	403	4.0464	7509.66	0	?	0	525	Calibration	-	403	4.0469	6021.19	0	?	0	525	Calibration	-	403	4.0464	5194.86	0	?
404	4.0566	11178.4	0	?	0	525	Calibration	-	404	4.0571	19778.2	0	?	0	525	Calibration	-	404	4.0564	7349.28	0	?	0	525	Calibration	-	404	4.0564	7519.3	0	?	0	525	Calibration	-	404	4.057	6021.59	0	?	0	525	Calibration	-	404	4.0564	5188.28	0	?
405	4.0666	11147.3	0	?	0	525	Calibration	-	405	4.0672	19780.4	0	?	0	525	Calibration	-	405	4.0664	7345.88	0	?	0	525	Calibration	-	405	4.0664	7524.91	0	?	0	525	Calibration	-	405	4.067	6029.71	0	?	0	525	Calibration	-	405	4.0664	5204.26	0	?
406	4.0766	11144.7	0	?	0	525	Calibration	-	406	4.0772	19805	0	?	0	525	Calibration	-	406	4.0765	7341.25	0	?	0	525	Calibration	-	406	4.0765	7526.68	0	?	0	525	Calibration	-	406	4.077	5999.58	0	?	0	525	Calibration	-	406	4.0765	5198.78	0	?
407	4.0867	11198	0	?	0	525	Calibration	-	407	4.0872	19761.7	0	?	0	525	Calibration	-	407	4.0865	7337.35	0	?	0	525	Calibration	-	407	4.0865	7521.43	0	?	0	525	Calibration	-	407	4.087	6020.91	0	?	0	525	Calibration	-	407	4.0865	5204.22	0	?
408	4.0967	11265.7	0	?	0	525	Calibration	-	408	4.0972	19760.1	0	?	0	525	Calibration	-	408	4.0965	7347.55	0	?	0	525	Calibration	-	408	4.0965	7509.15	0	?	0	525	Calibration	-	408	4.097	5986.13	0	?	0	525	Calibration	-	408	4.0965	5186.76	0	?
409	4.1067	11375.5	0	?	0	525	Calibration	-	409	4.1072	19741.3	0	?	0	525	Calibration	-	409	4.1065	7344.65	0	?	0	525	Calibration	-	409	4.1065	7470.52	0	?	0	525	Calibration	-	409	4.107	5999.85	0	?	0	525	Calibration	-	409	4.1065	5203.53	0	?
410	4.1167	11356.5	0	?	0	525	Calibration	-	410	4.1172	19742.8	0	?	0	525	Calibration	-	410	4.1165	7331.69	0	?	0	525	Calibration	-	410	4.1165	7471.37	0	?	0	525	Calibration	-	410	4.1171	6001.14	0	?	0	525	Calibration	-	410	4.1165	5203.46	0	?
411	4.1267	11293.2	0	?	0	525	Calibration	-	411	4.1273	19707.4	0	?	0	525	Calibration	-	411	4.1265	7345.66	0	?	0	525	Calibration	-	411	4.1265	7483.39	0	?	0	525	Calibration	-	411	4.1271	6007.32	0	?	0	525	Calibration	-	411	4.1265	5195.32	0	?
412	4.1367	11377.9	0	?	0	525	Calibration	-	412	4.1373	19729.8	0	?	0	525	Calibration	-	412	4.1365	7341.96	0	?	0	525	Calibration	-	412	4.1365	7468.88	0	?	0	525	Calibration	-	412	4.1371	6005.15	0	?	0	525	Calibration	-	412	4.1365	5193.58	0	?
413	4.1467	11552.3	0	?	0	525	Calibration	-	413	4.1473	19753.9	0	?	0	525	Calibration	-	413	4.1466	7333.93	0	?	0	525	Calibration	-	413	4.1466	7469.42	0	?	0	525	Calibration	-	413	4.1471	6009.38	0	?	0	525	Calibration	-	413	4.1466	5199.32	0	?
414	4.1568	11676.1	0	?	0	525	Calibration	-	414	4.1573	19723.9	0	?	0	525	Calibration	-	414	4.1566	7330.91	0	?	0	525	Calibration	-	414	4.1566	7480.77	0	?	0	525	Calibration	-	414	4.1571	6004.49	0	?	0	525	Calibration	-	414	4.1566	5208.82	0	?
415	4.1668	11732.3	0	?	0	525	Calibration	-	415	4.1673	19770.4	0	?	0	525	Calibration	-	415	4.1666	7322	0	?	0	525	Calibration	-	415	4.1666	7459.93	0	?	0	525	Calibration	-	415	4.1671	5991.6	0	?	0	525	Calibration	-	415	4.1666	5202.51	0	?
416	4.1768	11727	0	?	0	525	Calibration	-	416	4.1773	19792.1	0	?	0	525	Calibration	-	416	4.1766	7329.14	0	?	0	525	Calibration	-	416	4.1766	7452.52	0	?	0	525	Calibration	-	416	4.1772	6005.21	0	?	0	525	Calibration	-	416	4.1766	5202.41	0	?
417	4.1868	11574.3	0	?	0	525	Calibration	-	417	4.1874	19769.2	0	?	0	525	Calibration	-	417	4.1866	7317.24	0	?	0	525	Calibration	-	417	4.1866	7467.3	0	?	0	525	Calibration	-	417	4.1872	5991.04	0	?	0	525	Calibration	-	417	4.1866	5222.21	0	?
418	4.1968	11512	0	?	0	525	Calibration	-	418	4.1974	19692.4	0	?	0	525	Calibration	-	418	4.1966	7319.44	0	?	0	525	Calibration	-	418	4.1966	7485.34	0	?	0	525	Calibration	-	418	4.1972	6000.78	0	?	0	525	Calibration	-	418	4.1966	5204.08	0	?
419	4.2068	11618	0	?	0	525	Calibration	-	419	4.2074	19671.3	0	?	0	525	Calibration	-	419	4.2067	7337.86	0	?	0	525	Calibration	-	419	4.2067	7468.92	0	?	0	525	Calibration	-	419	4.2072	5990.21	0	?	0	525	Calibration	-	419	4.2067	5191.8	0	?
420	4.2169	11641.9	0	?	0	525	Calibration	-	420	4.2174	19639.4	0	?	0	525	Calibration	-	420	4.2167	7348.71	0	?	0	525	Calibration	-	420	4.2167	7475.61	0	?	0	525	Calibration	-	420	4.2172	5985.38	0	?	0	525	Calibration	-	420	4.2167	5216.44	0	?
421	4.2269	11695.5	0	?	0	525	Calibration	-	421	4.2274	19685.3	0	?	0	525	Calibration	-	421	4.2267	7342.82	0	?	0	525	Calibration	-	421	4.2267	7461.63	0	?	0	525	Calibration	-	421	4.2273	5983.94	0	?	0	525	Calibration	-	421	4.2267	5200.59	0	?
422	4.2369	11676.5	0	?	0	525	Calibration	-	422	4.2375	19671.5	0	?	0	525	Calibration	-	422	4.2367	7348.7	0	?	0	525	Calibration	-	422	4.2367	7477.34	0	?	0	525	Calibration	-	422	4.2373	6002.66	0	?	0	525	Calibration	-	422	4.2367	5209.5	0	?
423	4.2469	11462.8	0	?	0	525	Calibration	-	423	4.2475	19707.2	0	?	0	525	Calibration	-	423	4.2467	7353.93	0	?	0	525	Calibration	-	423	4.2467	7488.26	0	?	0	525	Calibration	-	423	4.2473	5989.11	0	?	0	525	Calibration	-	423	4.2467	5206.57	0	?
424	4.2569	11446	0	?	0	525	Calibration	-	424	4.2575	19703.2	0	?	0	525	Calibration	-	424	4.2567	7347.34	0	?	0	525	Calibration	-	424	4.2567	7487.69	0	?	0	525	Calibration	-	424	4.2573	5984.91	0	?	0	525	Calibration	-	424	4.2567	5194.66	0	?
425	4.2669	11420.9	0	?	0	525	Calibration	-	425	4.2675	19704.4	0	?	0	525	Calibration	-	425	4.2668	7354.14	0	?	0	525	Calibration	-	425	4.2668	7487.14	0	?	0	525	Calibration	-	425	4.2673	5988.58	0	?	0	525	Calibration	-	425	4.2668	5204.79	0	?
426	4.277	11345.8	0	?	0	525	Calibration	-	426	4.2775	19665.3	0	?	0	525	Calibration	-	426	4.2768	7356.25	0	?	0	525	Calibration	-	426	4.2768	7490.73	0	?	0	525	Calibration	-	426	4.2773	5983.47	0	?	0	525	Calibration	-	426	4.2768	5206.78	0	?
427	4.287	11298.5	0	?	0	525	Calibration	-	427	4.2875	19675.2	0	?	0	525	Calibration	-	427	4.2868	7333.23	0	?	0	525	Calibration	-	427	4.2868	7488.53	0	?	0	525	Calibration	-	427	4.2874	5993.23	0	?	0	525	Calibration	-	427	4.2868	5197.33	0	?
428	4.297	11265.9	0	?	0	525	Calibration	-	428	4.2976	19689.9	0	?	0	525	Calibration	-	428	4.2968	7335.14	0	?	0	525	Calibration	-	428	4.2968	7477.13	0	?	0	525	Calibration	-	428	4.2974	6000.66	0	?	0	525	Calibration	-	428	4.2968	5202.36	0	?
429	4.307	11332.2	0	?	0	525	Calibration	-	429	4.3076	19700.1	0	?	0	525	Calibration	-	429	4.3068	7326.02	0	?	0	525	Calibration	-	429	4.3068	7475.76	0	?	0	525	Calibration	-	429	4.3074	5983.92	0	?	0	525	Calibration	-	429	4.3068	5202.4	0	?
430	4.317	11323.4	0	?	0	525	Calibration	-	430	4.3176	19705.2	0	?	0	525	Calibration	-	430	4.3168	7356.31	0	?	0	525	Calibration	-	430	4.3168	7456.12	0	?	0	525	Calibration	-	430	4.3174	5986.58	0	?	0	525	Calibration	-	430	4.3168	5216.68	0	?
431	4.327	11416.5	0	?	0	525	Calibration	-	431	4.3276	19659.5	0	?	0	525	Calibration	-	431	4.3269	7348.59	0	?	0	525	Calibration	-	431	4.3269	7448.75	0	?	0	525	Calibration	-	431	4.3274	5999.76	0	?	0	525	Calibration	-	431	4.3269	5204.02	0	?
432	4.3371	11349.9	0	?	0	525	Calibration	-	432	4.3376	19690	0	?	0	525	Calibration	-	432	4.3369	7338.31	0	?	0	525	Calibration	-	432	4.3369	7461.46	0	?	0	525	Calibration	-	432	4.3374	6008.54	0	?	0	525	Calibration	-	432	4.3369	5195.22	0	?
433	4.3471	11333.9	0	?	0	525	Calibration	-	433	4.3476	19690.1	0	?	0	525	Calibration	-	433	4.3469	7329.22	0	?	0	525	Calibration	-	433	4.3469	7486.52	0	?	0	525	Calibration	-	433	4.3475	6019.41	0	?	0	525	Calibration	-	433	4.3469	5197	0	?
434	4.3571	11413.1	0	?	0	525	Calibration	-	434	4.3577	19718.3	0	?	0	525	Calibration	-	434	4.3569	7319.58	0	?	0	525	Calibration	-	434	4.3569	7489.58	0	?	0	525	Calibration	-	434	4.3575	6013.1	0	?	0	525	Calibration	-	434	4.3569	5189.09	0	?
435	4.3671	11499	0	?	0	525	Calibration	-	435	4.3677	19720.1	0	?	0	525	Calibration	-	435	4.3669	7304.46	0	?	0	525	Calibration	-	435	4.3669	7503.73	0	?	0	525	Calibration	-	435	4.3675	5985.54	0	?	0	525	Calibration	-	435	4.3669	5184.94	0	?
436	4.3771	11415.1	0	?	0	525	Calibration	-	436	4.3777	19737.3	0	?	0	525	Calibration	-	436	4.3769	7322.9	0	?	0	525	Calibration	-	436	4.3769	7485.58	0	?	0	525	Calibration	-	436	4.3775	6002.9	0	?	0	525	Calibration	-	436	4.3769	5189.87	0	?
437	4.3871	11331.9	0	?	0	525	Calibration	-	437	4.3877	19700.4	0	?	0	525	Calibration	-	437	4.3869	7316.04	0	?	0	525	Calibration	-	437	4.3869	7464.4	0	?	0	525	Calibration	-	437	4.3875	5991.07	0	?	0	525	Calibration	-	437	4.3869	5189.06	0	?
438	4.3972	11373.6	0	?	0	525	Calibration	-	438	4.3977	19703.4	0	?	0	525	Calibration	-	438	4.397	7321.7	0	?	0	525	Calibration	-	438	4.397	7459.1	0	?	0	525	Calibration	-	438	4.3975	6009.18	0	?	0	525	Calibration	-	438	4.397	5178.8	0	?
439	4.4072	11402.9	0	?	0	525	Calibration	-	439	4.4078	19676.1	0	?	0	525	Calibration	-	439	4.407	7345.22	0	?	0	525	Calibration	-	439	4.407	7444.53	0	?	0	525	Calibration	-	439	4.4076	5995.66	0	?	0	525	Calibration	-	439	4.407	5193.44	0	?
440	4.4172	11437.1	0	?	0	525	Calibration	-	440	4.4178	19705.2	0	?	0	525	Calibration	-	440	4.417	7320.09	0	?	0	525	Calibration	-	440	4.417	7452.14	0	?	0	525	Calibration	-	440	4.4176	5999.42	0	?	0	525	Calibration	-	440	4.417	5181.95	0	?
441	4.4272	11539.1	0	?	0	525	Calibration	-	441	4.4278	19709.5	0	?	0	525	Calibration	-	441	4.427	7320.21	0	?	0	525	Calibration	-	441	4.427	7455.34	0	?	0	525	Calibration	-	441	4.4276	6001.3	0	?	0	525	Calibration	-	441	4.427	5188.43	0	?
442	4.4372	11563.2	0	?	0	525	Calibration	-	442	4.4378	19659.5	0	?	0	525	Calibration	-	442	4.437	7312.84	0	?	0	525	Calibration	-	442	4.437	7440.74	0	?	0	525	Calibration	-	442	4.4376	5981.31	0	?	0	525	Calibration	-	442	4.437	5190.68	0	?
443	4.4472	11586.1	0	?	0	525	Calibration	-	443	4.4478	19679.6	0	?	0	525	Calibration	-	443	4.447	7316.26	0	?	0	525	Calibration	-	443	4.447	7442.04	0	?	0	525	Calibration	-	443	4.4476	5984.22	0	?	0	525	Calibration	-	443	4.447	5192.77	0	?
444	4.4573	11648.6	0	?	0	525	Calibration	-	444	4.4578	19688.6	0	?	0	525	Calibration	-	444	4.4571	7321.29	0	?	0	525	Calibration	-	444	4.4571	7448.83	0	?	0	525	Calibration	-	444	4.4576	5998.91	0	?	0	525	Calibration	-	444	4.4571	5191.92	0	?
445	4.4673	11732.8	0	?	0	525	Calibration	-	445	4.4679	19647.8	0	?	0	525	Calibration	-	445	4.4671	7319.35	0	?	0	525	Calibration	-	445	4.4671	7463.28	0	?	0	525	Calibration	-	445	4.4677	6007.81	0	?	0	525	Calibration	-	445	4.4671	5184.26	0	?
446	4.4773	11813.3	0	?	0	525	Calibration	-	446	4.4779	19702.1	0	?	0	525	Calibration	-	446	4.4771	7324.65	0	?	0	525	Calibration	-	446	4.4771	7481.35	0	?	0	525	Calibration	-	446	4.4777	5993.87	0	?	0	525	Calibration	-	446	4.4771	5200.62	0	?
447	4.4873	11631.5	0	?	0	525	Calibration	-	447	4.4879	19717.1	0	?	0	525	Calibration	-	447	4.4871	7321.34	0	?	0	525	Calibration	-	447	4.4871	7434.14	0	?	0	525	Calibration	-	447	4.4877	5985.8	0	?	0	525	Calibration	-	447	4.4871	5188.66	0	?
448	4.4973	11478.2	0	?	0	525	Calibration	-	448	4.4979	19676.6	0	?	0	525	Calibration	-	448	4.4971	7330.25	0	?	0	525	Calibration	-	448	4.4971	7454.48	0	?	0	525	Calibration	-	448	4.4977	5988.56	0	?	0	525	Calibration	-	448	4.4971	5187.87	0	?
449	4.5073	11421.5	0	?	0	525	Calibration	-	449	4.5079	19734.9	0	?	0	525	Calibration	-	449	4.5071	7330.33	0	?	0	525	Calibration	-	449	4.5071	7485.98	0	?	0	525	Calibration	-	449	4.5077	5999.84	0	?	0	525	Calibration	-	449	4.5071	5199.77	0	?
450	4.5174	11377	0	?	0	525	Calibration	-	450	4.5179	19682.3	0	?	0	525	Calibration	-	450	4.5172	7332.68	0	?	0	525	Calibration	-	450	4.5172	7501.84	0	?	0	525	Calibration	-	450	4.5177	5990.83	0	?	0	525	Calibration	-	450	4.5172	5182.09	0	?
451	4.5274	11286.8	0	?	0	525	Calibration	-	451	4.528	19676.1	0	?	0	525	Calibration	-	451	4.5272	7328.23	0	?	0	525	Calibration	-	451	4.5272	7500.89	0	?	0	525	Calibration	-	451	4.5278	6008.25	0	?	0	525	Calibration	-	451	4.5272	5179.42	0	?
452	4.5374	11201	0	?	0	525	Calibration	-	452	4.538	19668.8	0	?	0	525	Calibration	-	452	4.5372	7322.6	0	?	0	525	Calibration	-	452	4.5372	7481.09	0	?	0	525	Calibration	-	452	4.5378	5990.78	0	?	0	525	Calibration	-	452	4.5372	5186.6	0	?
453	4.5474	11195.7	0	?	0	525	Calibration	-	453	4.548	19710.3	0	?	0	525	Calibration	-	453	4.5472	7315.22	0	?	0	525	Calibration	-	453	4.5472	7458.8	0	?	0	525	Calibration	-	453	4.5478	5989.72	0	?	0	525	Calibration	-	453	4.5472	5196.73	0	?
454	4.5574	11339.1	0	?	0	525	Calibration	-	454	4.558	19721.7	0	?	0	525	Calibration	-	454	4.5572	7311.29	0	?	0	525	Calibration	-	454	4.5572	7473.28	0	?	0	525	Calibration	-	454	4.5578	5998.31	0	?	0	525	Calibration	-	454	4.5572	5182.22	0	?
455	4.5674	11414.5	0	?	0	525	Calibration	-	455	4.568	19740.3	0	?	0	525	Calibration	-	455	4.5672	7305.86	0	?	0	525	Calibration	-	455	4.5672	7441.05	0	?	0	525	Calibration	-	455	4.5678	5988.59	0	?	0	525	Calibration	-	455	4.5672	5193.68	0	?
456	4.5774	11526.2	0	?	0	525	Calibration	-	456	4.5781	19724.8	0	?	0	525	Calibration	-	456	4.5772	7298.18	0	?	0	525	Calibration	-	456	4.5772	7446.46	0	?	0	525	Calibration	-	456	4.5779	5980.76	0	?	0	525	Calibration	-	456	4.5772	5187.52	0	?
457	4.5875	11596.9	0	?	0	525	Calibration	-	457	4.5881	19754.2	0	?	0	525	Calibration	-	457	4.5873	7305.72	0	?	0	525	Calibration	-	457	4.5873	7467.92	0	?	0	525	Calibration	-	457	4.5879	5971.34	0	?	0	525	Calibration	-	457	4.5873	5186.44	0	?
458	4.5975	11731.2	0	?	0	525	Calibration	-	458	4.5981	19774	0	?	0	525	Calibration	-	458	4.5973	7299.14	0	?	0	525	Calibration	-	458	4.5973	7477.09	0	?	0	525	Calibration	-	458	4.5979	5983.51	0	?	0	525	Calibration	-	458	4.5973	5194.53	0	?
459	4.6075	11798.7	0	?	0	525	Calibration	-	459	4.6081	19774.1	0	?	0	525	Calibration	-	459	4.6073	7299.2	0	?	0	525	Calibration	-	459	4.6073	7491.07	0	?	0	525	Calibration	-	459	4.6079	5988.44	0	?	0	525	Calibration	-	459	4.6073	5197.36	0	?
460	4.6175	11826.5	0	?	0	525	Calibration	-	460	4.6181	19772.1	0	?	0	525	Calibration	-	460	4.6173	7300.69	0	?	0	525	Calibration	-	460	4.6173	7465.05	0	?	0	525	Calibration	-	460	4.6179	5982.13	0	?	0	525	Calibration	-	460	4.6173	5180.22	0	?
461	4.6275	11840.9	0	?	0	525	Calibration	-	461	4.6281	19748.9	0	?	0	525	Calibration	-	461	4.6273	7322.51	0	?	0	525	Calibration	-	461	4.6273	7456.27	0	?	0	525	Calibration	-	461	4.6279	5951	0	?	0	525	Calibration	-	461	4.6273	5196.91	0	?
462	4.6375	11856.1	0	?	0	525	Calibration	-	462	4.6382	19706.4	0	?	0	525	Calibration	-	462	4.6373	7322.56	0	?	0	525	Calibration	-	462	4.6373	7432.27	0	?	0	525	Calibration	-	462	4.638	5972.52	0	?	0	525	Calibration	-	462	4.6373	5182.51	0	?
463	4.6476	11875.4	0	?	0	525	Calibration	-	463	4.6482	19701	0	?	0	525	Calibration	-	463	4.6474	7322.4	0	?	0	525	Calibration	-	463	4.6474	7418.69	0	?	0	525	Calibration	-	463	4.648	6013.25	0	?	0	525	Calibration	-	463	4.6474	5168.53	0	?
464	4.6576	11838.5	0	?	0	525	Calibration	-	464	4.6582	19696	0	?	0	525	Calibration	-	464	4.6574	7309.76	0	?	0	525	Calibration	-	464	4.6574	7423.66	0	?	0	525	Calibration	-	464	4.658	6006.47	0	?	0	525	Calibration	-	464	4.6574	5165.46	0	?
465	4.6676	11800.1	0	?	0	525	Calibration	-	465	4.6682	19697	0	?	0	525	Calibration	-	465	4.6674	7289.14	0	?	0	525	Calibration	-	465	4.6674	7421.47	0	?	0	525	Calibration	-	465	4.668	5999.27	0	?	0	525	Calibration	-	465	4.6674	5176.52	0	?
466	4.6776	11838.1	0	?	0	525	Calibration	-	466	4.6782	19700.4	0	?	0	525	Calibration	-	466	4.6774	7315.47	0	?	0	525	Calibration	-	466	4.6774	7414.89	0	?	0	525	Calibration	-	466	4.678	5975.06	0	?	0	525	Calibration	-	466	4.6774	5190.82	0	?
467	4.6876	11798.8	0	?	0	525	Calibration	-	467	4.6882	19695.1	0	?	0	525	Calibration	-	467	4.6874	7309.96	0	?	0	525	Calibration	-	467	4.6874	7421.1	0	?	0	525	Calibration	-	467	4.688	5989.87	0	?	0	525	Calibration	-	467	4.6874	5182.69	0	?
468	4.6976	11608.4	0	?	0	525	Calibration	-	468	4.6983	19690.1	0	?	0	525	Calibration	-	468	4.6974	7305.3	0	?	0	525	Calibration	-	468	4.6974	7448.04	0	?	0	525	Calibration	-	468	4.6981	5985.18	0	?	0	525	Calibration	-	468	4.6974	5186.52	0	?
469	4.7077	11466.6	0	?	0	525	Calibration	-	469	4.7083	19669	0	?	0	525	Calibration	-	469	4.7075	7314.41	0	?	0	525	Calibration	-	469	4.7075	7437.08	0	?	0	525	Calibration	-	469	4.7081	5993.44	0	?	0	525	Calibration	-	469	4.7075	5174.07	0	?
470	4.7177	11400	0	?	0	525	Calibration	-	470	4.7183	19629.9	0	?	0	525	Calibration	-	470	4.7175	7299.69	0	?	0	525	Calibration	-	470	4.7175	7430.25	0	?	0	525	Calibration	-	470	4.7181	5974.81	0	?	0	525	Calibration	-	470	4.7175	5167.22	0	?
471	4.7277	11343.2	0	?	0	525	Calibration	-	471	4.7283	19604.2	0	?	0	525	Calibration	-	471	4.7275	7299.86	0	?	0	525	Calibration	-	471	4.7275	7435.86	0	?	0	525	Calibration	-	471	4.7281	6006.83	0	?	0	525	Calibration	-	471	4.7275	5176.27	0	?
472	4.7377	11297.5	0	?	0	525	Calibration	-	472	4.7383	19645.9	0	?	0	525	Calibration	-	472	4.7375	7298.31	0	?	0	525	Calibration	-	472	4.7375	7429.79	0	?	0	525	Calibration	-	472	4.7381	5998.83	0	?	0	525	Calibration	-	472	4.7375	5172.53	0	?
473	4.7477	11202	0	?	0	525	Calibration	-	473	4.7484	19624.7	0	?	0	525	Calibration	-	473	4.7475	7309.72	0	?	0	525	Calibration	-	473	4.7475	7426.2	0	?	0	525	Calibration	-	473	4.7481	5987.33	0	?	0	525	Calibration	-	473	4.7475	5191.21	0	?
474	4.7577	11212.4	0	?	0	525	Calibration	-	474	4.7584	19657.3	0	?	0	525	Calibration	-	474	4.7575	7290.84	0	?	0	525	Calibration	-	474	4.7575	7439.1	0	?	0	525	Calibration	-	474	4.7582	5983.42	0	?	0	525	Calibration	-	474	4.7575	5181.43	0	?
475	4.7678	11262.6	0	?	0	525	Calibration	-	475	4.7684	19684.4	0	?	0	525	Calibration	-	475	4.7675	7306.2	0	?	0	525	Calibration	-	475	4.7675	7435.76	0	?	0	525	Calibration	-	475	4.7682	5989.58	0	?	0	525	Calibration	-	475	4.7675	5183.21	0	?
476	4.7778	11234.8	0	?	0	525	Calibration	-	476	4.7784	19702.1	0	?	0	525	Calibration	-	476	4.7776	7282.66	0	?	0	525	Calibration	-	476	4.7776	7409.16	0	?	0	525	Calibration	-	476	4.7782	5991.1	0	?	0	525	Calibration	-	476	4.7776	5168.02	0	?
477	4.7878	11226.6	0	?	0	525	Calibration	-	477	4.7884	19703.7	0	?	0	525	Calibration	-	477	4.7876	7280.6	0	?	0	525	Calibration	-	477	4.7876	7406.78	0	?	0	525	Calibration	-	477	4.7882	5994.07	0	?	0	525	Calibration	-	477	4.7876	5171.11	0	?
478	4.7978	11272	0	?	0	525	Calibration	-	478	4.7984	19657.7	0	?	0	525	Calibration	-	478	4.7976	7301.53	0	?	0	525	Calibration	-	478	4.7976	7405.65	0	?	0	525	Calibration	-	478	4.7982	5984.83	0	?	0	525	Calibration	-	478	4.7976	5181.14	0	?
479	4.8078	11268.6	0	?	0	525	Calibration	-	479	4.8085	19672.5	0	?	0	525	Calibration	-	479	4.8076	7292.5	0	?	0	525	Calibration	-	479	4.8076	7402.86	0	?	0	525	Calibration	-	479	4.8082	5979.62	0	?	0	525	Calibration	-	479	4.8076	5164.71	0	?
480	4.8178	11330.7	0	?	0	525	Calibration	-	480	4.8185	19656.9	0	?	0	525	Calibration	-	480	4.8176	7300.76	0	?	0	525	Calibration	-	480	4.8176	7419.14	0	?	0	525	Calibration	-	480	4.8183	5979.9	0	?	0	525	Calibration	-	480	4.8176	5151.93	0	?
481	4.8279	11414.4	0	?	0	525	Calibration	-	481	4.8285	19679.2	0	?	0	525	Calibration	-	481	4.8276	7305.17	0	?	0	525	Calibration	-	481	4.8276	7426.3	0	?	0	525	Calibration	-	481	4.8283	5989.75	0	?	0	525	Calibration	-	481	4.8276	5182.34	0	?
482	4.8379	11468.6	0	?	0	525	Calibration	-	482	4.8385	19703.2	0	?	0	525	Calibration	-	482	4.8377	7296.29	0	?	0	525	Calibration	-	482	4.8377	7429.41	0	?	0	525	Calibration	-	482	4.8383	5969.55	0	?	0	525	Calibration	-	482	4.8377	5184.83	0	?
483	4.8479	11552.2	0	?	0	525	Calibration	-	483	4.8485	19715.3	0	?	0	525	Calibration	-	483	4.8477	7291.86	0	?	0	525	Calibration	-	483	4.8477	7423.88	0	?	0	525	Calibration	-	483	4.8483	5977.07	0	?	0	525	Calibration	-	483	4.8477	5180.95	0	?
484	4.8579	11579.4	0	?	0	525	Calibration	-	484	4.8585	19732.3	0	?	0	525	Calibration	-	484	4.8577	7288.69	0	?	0	525	Calibration	-	484	4.8577	7418.66	0	?	0	525	Calibration	-	484	4.8583	5983.11	0	?	0	525	Calibration	-	484	4.8577	5170.56	0	?
485	4.8679	11579	0	?	0	525	Calibration	-	485	4.8686	19736.6	0	?	0	525	Calibration	-	485	4.8677	7273.92	0	?	0	525	Calibration	-	485	4.8677	7425.2	0	?	0	525	Calibration	-	485	4.8683	5989.52	0	?	0	525	Calibration	-	485	4.8677	5158.23	0	?
486	4.8779	11635.5	0	?	0	525	Calibration	-	486	4.8786	19784.8	0	?	0	525	Calibration	-	486	4.8777	7285.25	0	?	0	525	Calibration	-	486	4.8777	7432.1	0	?	0	525	Calibration	-	486	4.8784	5987.34	0	?	0	525	Calibration	-	486	4.8777	5156.23	0	?
487	4.888	11602.5	0	?	0	525	Calibration	-	487	4.8886	19799.8	0	?	0	525	Calibration	-	487	4.8877	7275.43	0	?	0	525	Calibration	-	487	4.8877	7439.11	0	?	0	525	Calibration	-	487	4.8884	5983	0	?	0	525	Calibration	-	487	4.8877	5163.27	0	?
488	4.898	11629.3	0	?	0	525	Calibration	-	488	4.8986	19778.6	0	?	0	525	Calibration	-	488	4.8978	7288.55	0	?	0	525	Calibration	-	488	4.8978	7405.74	0	?	0	525	Calibration	-	488	4.8984	5983.51	0	?	0	525	Calibration	-	488	4.8978	5164.06	0	?
489	4.908	11632.4	0	?	0	525	Calibration	-	489	4.9086	19773.1	0	?	0	525	Calibration	-	489	4.9078	7283.82	0	?	0	525	Calibration	-	489	4.9078	7393.88	0	?	0	525	Calibration	-	489	4.9084	5958.54	0	?	0	525	Calibration	-	489	4.9078	5160.21	0	?
490	4.918	11605.5	0	?	0	525	Calibration	-	490	4.9187	19768.2	0	?	0	525	Calibration	-	490	4.9178	7277.72	0	?	0	525	Calibration	-	490	4.9178	7384.35	0	?	0	525	Calibration	-	490	4.9184	5986.59	0	?	0	525	Calibration	-	490	4.9178	5176.48	0	?
491	4.928	11700.2	0	?	0	525	Calibration	-	491	4.9287	19816	0	?	0	525	Calibration	-	491	4.9278	7272.65	0	?	0	525	Calibration	-	491	4.9278	7400.44	0	?	0	525	Calibration	-	491	4.9285	5950.21	0	?	0	525	Calibration	-	491	4.9278	5174.05	0	?
492	4.938	11724	0	?	0	525	Calibration	-	492	4.9387	19843.1	0	?	0	525	Calibration	-	492	4.9378	7282.59	0	?	0	525	Calibration	-	492	4.9378	7396.13	0	?	0	525	Calibration	-	492	4.9385	5949.67	0	?	0	525	Calibration	-	492	4.9378	5168.15	0	?
493	4.9481	11652.2	0	?	0	525	Calibration	-	493	4.9487	19848.5	0	?	0	525	Calibration	-	493	4.9478	7271.4	0	?	0	525	Calibration	-	493	4.9478	7397.79	0	?	0	525	Calibration	-	493	4.9485	5963.01	0	?	0	525	Calibration	-	493	4.9478	5152.51	0	?
494	4.9581	11692.7	0	?	0	525	Calibration	-	494	4.9587	19838.1	0	?	0	525	Calibration	-	494	4.9579	7272.87	0	?	0	525	Calibration	-	494	4.9579	7411.97	0	?	0	525	Calibration	-	494	4.9585	5973.6	0	?	0	525	Calibration	-	494	4.9579	5163.69	0	?
495	4.9681	11530.2	0	?	0	525	Calibration	-	495	4.9687	19891.5	0	?	0	525	Calibration	-	495	4.9679	7269.83	0	?	0	525	Calibration	-	495	4.9679	7377.21	0	?	0	525	Calibration	-	495	4.9685	5959.57	0	?	0	525	Calibration	-	495	4.9679	5180.11	0	?
496	4.9781	11359.4	0	?	0	525	Calibration	-	496	4.9788	19913.8	0	?	0	525	Calibration	-	496	4.9779	7270.2	0	?	0	525	Calibration	-	496	4.9779	7382.35	0	?	0	525	Calibration	-	496	4.9785	5977.12	0	?	0	525	Calibration	-	496	4.9779	5173.68	0	?
497	4.9881	11263.8	0	?	0	525	Calibration	-	497	4.9888	19912	0	?	0	525	Calibration	-	497	4.9879	7273.51	0	?	0	525	Calibration	-	497	4.9879	7392.99	0	?	0	525	Calibration	-	497	4.9886	5985.99	0	?	0	525	Calibration	-	497	4.9879	5172.97	0	?
498	4.9981	11180.1	0	?	0	525	Calibration	-	498	4.9988	19919.2	0	?	0	525	Calibration	-	498	4.9979	7277.89	0	?	0	525	Calibration	-	498	4.9979	7397.19	0	?	0	525	Calibration	-	498	4.9986	5970.53	0	?	0	525	Calibration	-	498	4.9979	5177.26	0	?
499	5.0081	11117.7	0	?	0	525	Calibration	-	499	5.0088	19886.6	0	?	0	525	Calibration	-	499	5.0079	7280.92	0	?	0	525	Calibration	-	499	5.0079	7389.46	0	?	0	525	Calibration	-	499	5.0086	5963.86	0	?	0	525	Calibration	-	499	5.0079	5158.32	0	?
500	5.0182	11140.5	0	?	0	525	Calibration	-	500	5.0188	19884.9	0	?	0	525	Calibration	-	500	5.0179	7293.39	0	?	0	525	Calibration	-	500	5.0179	7427.14	0	?	0	525	Calibration	-	500	5.0186	5968.68	0	?	0	525	Calibration	-	500	5.0179	5158.11	0	?
501	5.0282	11001.7	0	?	0	525	Calibration	-	501	5.0288	19885.3	0	?	0	525	Calibration	-	501	5.028	7295.6	0	?	0	525	Calibration	-	501	5.028	7433.29	0	?	0	525	Calibration	-	501	5.0286	5948.24	0	?	0	525	Calibration	-	501	5.028	5173.93	0	?
502	5.0382	10856.3	0	?	0	525	Calibration	-	502	5.0389	19918.1	0	?	0	525	Calibration	-	502	5.038	7282.99	0	?	0	525	Calibration	-	502	5.038	7427	0	?	0	525	Calibration	-	502	5.0386	5961.6	0	?	0	525	Calibration	-	502	5.038	5159.51	0	?
503	5.0482	10862.5	0	?	0	525	Calibration	-	503	5.0489	19936.4	0	?	0	525	Calibration	-	503	5.048	7286.94	0	?	0	525	Calibration	-	503	5.048	7409.58	0	?	0	525	Calibration	-	503	5.0487	5976.64	0	?	0	525	Calibration	-	503	5.048	5187.63	0	?
504	5.0582	10886.8	0	?	0	525	Calibration	-	504	5.0589	19974.6	0	?	0	525	Calibration	-	504	5.058	7293.38	0	?	0	525	Calibration	-	504	5.058	7404.78	0	?	0	525	Calibration	-	504	5.0587	5972.91	0	?	0	525	Calibration	-	504	5.058	5165.06	0	?
505	5.0682	10888.5	0	?	0	525	Calibration	-	505	5.0689	19938	0	?	0	525	Calibration	-	505	5.068	7282.26	0	?	0	525	Calibration	-	505	5.068	7400.43	0	?	0	525	Calibration	-	505	5.0687	5948.71	0	?	0	525	Calibration	-	505	5.068	5175.29	0	?
506	5.0783	10966.8	0	?	0	525	Calibration	-	506	5.0789	19944.7	0	?	0	525	Calibration	-	506	5.078	7274.05	0	?	0	525	Calibration	-	506	5.078	7405.3	0	?	0	525	Calibration	-	506	5.0787	5960.41	0	?	0	525	Calibration	-	506	5.078	5161.59	0	?
507	5.0883	11010.6	0	?	0	525	Calibration	-	507	5.089	20022.3	0	?	0	525	Calibration	-	507	5.0881	7289.74	0	?	0	525	Calibration	-	507	5.0881	7412.63	0	?	0	525	Calibration	-	507	5.0887	5954.38	0	?	0	525	Calibration	-	507	5.0881	5169.38	0	?
508	5.0983	11196	0	?	0	525	Calibration	-	508	5.099	19995.7	0	?	0	525	Calibration	-	508	5.0981	7304.15	0	?	0	525	Calibration	-	508	5.0981	7385.37	0	?	0	525	Calibration	-	508	5.0987	5975.62	0	?	0	525	Calibration	-	508	5.0981	5175.55	0	?
509	5.1083	11346.2	0	?	0	525	Calibration	-	509	5.109	20057.8	0	?	0	525	Calibration	-	509	5.1081	7290.04	0	?	0	525	Calibration	-	509	5.1081	7375.33	0	?	0	525	Calibration	-	509	5.1088	5971.1	0	?	0	525	Calibration	-	509	5.1081	5143.63	0	?
510	5.1183	11470	0	?	0	525	Calibration	-	510	5.119	20037.1	0	?	0	525	Calibration	-	510	5.1181	7287.23	0	?	0	525	Calibration	-	510	5.1181	7360.45	0	?	0	525	Calibration	-	510	5.1188	5980.27	0	?	0	525	Calibration	-	510	5.1181	5145.96	0	?
511	5.1283	11479.1	0	?	0	525	Calibration	-	511	5.129	20032.6	0	?	0	525	Calibration	-	511	5.1281	7283.74	0	?	0	525	Calibration	-	511	5.1281	7365.27	0	?	0	525	Calibration	-	511	5.1288	5961.74	0	?	0	525	Calibration	-	511	5.1281	5149.91	0	?
512	5.1384	11551.6	0	?	0	525	Calibration	-	512	5.139	19974.2	0	?	0	525	Calibration	-	512	5.1381	7293.72	0	?	0	525	Calibration	-	512	5.1381	7385.43	0	?	0	525	Calibration	-	512	5.1388	5977.82	0	?	0	525	Calibration	-	512	5.1381	5147.88	0	?
513	5.1484	11572.6	0	?	0	525	Calibration	-	513	5.1491	19929	0	?	0	525	Calibration	-	513	5.1482	7303.41	0	?	0	525	Calibration	-	513	5.1482	7387.16	0	?	0	525	Calibration	-	513	5.1488	5973.71	0	?	0	525	Calibration	-	513	5.1482	5164.41	0	?
514	5.1584	11619.8	0	?	0	525	Calibration	-	514	5.1591	19982.6	0	?	0	525	Calibration	-	514	5.1582	7292.87	0	?	0	525	Calibration	-	514	5.1582	7387.98	0	?	0	525	Calibration	-	514	5.1588	5982.41	0	?	0	525	Calibration	-	514	5.1582	5154.09	0	?
515	5.1684	11675	0	?	0	525	Calibration	-	515	5.1691	19980.9	0	?	0	525	Calibration	-	515	5.1682	7299.85	0	?	0	525	Calibration	-	515	5.1682	7406.23	0	?	0	525	Calibration	-	515	5.1689	5962.88	0	?	0	525	Calibration	-	515	5.1682	5156.69	0	?
516	5.1784	11587.9	0	?	0	525	Calibration	-	516	5.1791	19927.4	0	?	0	525	Calibration	-	516	5.1782	7288.85	0	?	0	525	Calibration	-	516	5.1782	7397.79	0	?	0	525	Calibration	-	516	5.1789	5960.19	0	?	0	525	Calibration	-	516	5.1782	5179.29	0	?
517	5.1884	11680.1	0	?	0	525	Calibration	-	517	5.1891	19801.1	0	?	0	525	Calibration	-	517	5.1882	7290.07	0	?	0	525	Calibration	-	517	5.1882	7390.73	0	?	0	525	Calibration	-	517	5.1889	5954.79	0	?	0	525	Calibration	-	517	5.1882	5154.77	0	?
518	5.1985	11632.1	0	?	0	525	Calibration	-	518	5.1991	19839.5	0	?	0	525	Calibration	-	518	5.1982	7295.11	0	?	0	525	Calibration	-	518	5.1982	7389.37	0	?	0	525	Calibration	-	518	5.1989	5950.43	0	?	0	525	Calibration	-	518	5.1982	5170.77	0	?
519	5.2085	11616.4	0	?	0	525	Calibration	-	519	5.2092	19849.8	0	?	0	525	Calibration	-	519	5.2082	7307.76	0	?	0	525	Calibration	-	519	5.2082	7390.65	0	?	0	525	Calibration	-	519	5.2089	5962.29	0	?	0	525	Calibration	-	519	5.2082	5149.46	0	?
520	5.2185	11577.7	0	?	0	525	Calibration	-	520	5.2192	19949.4	0	?	0	525	Calibration	-	520	5.2183	7287.67	0	?	0	525	Calibration	-	520	5.2183	7401.74	0	?	0	525	Calibration	-	520	5.219	5975.76	0	?	0	525	Calibration	-	520	5.2183	5160.65	0	?
521	5.2285	11539.7	0	?	0	525	Calibration	-	521	5.2292	19928.4	0	?	0	525	Calibration	-	521	5.2283	7273.22	0	?	0	525	Calibration	-	521	5.2283	7411.93	0	?	0	525	Calibration	-	521	5.229	5939.32	0	?	0	525	Calibration	-	521	5.2283	5160.72	0	?
522	5.2385	11488.5	0	?	0	525	Calibration	-	522	5.2392	19901.8	0	?	0	525	Calibration	-	522	5.2383	7273.33	0	?	0	525	Calibration	-	522	5.2383	7397.07	0	?	0	525	Calibration	-	522	5.239	5955.32	0	?	0	525	Calibration	-	522	5.2383	5160.22	0	?
523	5.2485	11504.9	0	?	0	525	Calibration	-	523	5.2492	19900	0	?	0	525	Calibration	-	523	5.2483	7272.14	0	?	0	525	Calibration	-	523	5.2483	7413.59	0	?	0	525	Calibration	-	523	5.249	5962.24	0	?	0	525	Calibration	-	523	5.2483	5164.4	0	?
524	5.2586	11648.9	0	?	0	525	Calibration	-	524	5.2593	19912	0	?	0	525	Calibration	-	524	5.2583	7288.72	0	?	0	525	Calibration	-	524	5.2583	7394.76	0	?	0	525	Calibration	-	524	5.259	5943.94	0	?	0	525	Calibration	-	524	5.2583	5161.25	0	?
525	5.2686	11831.9	0	?	0	525	Calibration	-	525	5.2693	20015	0	?	0	525	Calibration	-	525	5.2683	7291.74	0	?	0	525	Calibration	-	525	5.2683	7367.33	0	?	0	525	Calibration	-	525	5.269	5968.38	0	?	0	525	Calibration	-	525	5.2683	5162.77	0	?
526	5.2786	11813.4	0	?	0	525	Calibration	-	526	5.2793	20075	0	?	0	525	Calibration	-	526	5.2784	7255.22	0	?	0	525	Calibration	-	526	5.2784	7378.49	0	?	0	525	Calibration	-	526	5.2791	5944.31	0	?	0	525	Calibration	-	526	5.2784	5156.18	0	?
527	5.2886	11878.1	0	?	0	525	Calibration	-	527	5.2893	20108.5	0	?	0	525	Calibration	-	527	5.2884	7268.15	0	?	0	525	Calibration	-	527	5.2884	7372.03	0	?	0	525	Calibration	-	527	5.2891	5971.09	0	?	0	525	Calibration	-	527	5.2884	5164.2	0	?
528	5.2986	11806.3	0	?	0	525	Calibration	-	528	5.2993	19990.9	0	?	0	525	Calibration	-	528	5.2984	7259.64	0	?	0	525	Calibration	-	528	5.2984	7351.66	0	?	0	525	Calibration	-	528	5.2991	5960.33	0	?	0	525	Calibration	-	528	5.2984	5155.77	0	?
529	5.3086	11834.5	0	?	0	525	Calibration	-	529	5.3093	19938.2	0	?	0	525	Calibration	-	529	5.3084	7252.09	0	?	0	525	Calibration	-	529	5.3084	7366.42	0	?	0	525	Calibration	-	529	5.3091	5940.92	0	?	0	525	Calibration	-	529	5.3084	5167.71	0	?
530	5.3187	11706.8	0	?	0	525	Calibration	-	530	5.3194	19856.1	0	?	0	525	Calibration	-	530	5.3184	7252.27	0	?	0	525	Calibration	-	530	5.3184	7373.6	0	?	0	525	Calibration	-	530	5.3191	5949.69	0	?	0	525	Calibration	-	530	5.3184	5153.79	0	?
531	5.3287	11672.1	0	?	0	525	Calibration	-	531	5.3294	19916.8	0	?	0	525	Calibration	-	531	5.3284	7244.02	0	?	0	525	Calibration	-	531	5.3284	7362.7	0	?	0	525	Calibration	-	531	5.3291	5956.96	0	?	0	525	Calibration	-	531	5.3284	5152.52	0	?
532	5.3387	11558.8	0	?	0	525	Calibration	-	532	5.3394	19923.8	0	?	0	525	Calibration	-	532	5.3385	7264.53	0	?	0	525	Calibration	-	532	5.3385	7378.17	0	?	0	525	Calibration	-	532	5.3392	5963.96	0	?	0	525	Calibration	-	532	5.3385	5161.95	0	?
533	5.3487	11473.5	0	?	0	525	Calibration	-	533	5.3494	19963.4	0	?	0	525	Calibration	-	533	5.3485	7267.63	0	?	0	525	Calibration	-	533	5.3485	7370.24	0	?	0	525	Calibration	-	533	5.3492	5961.53	0	?	0	525	Calibration	-	533	5.3485	5171.45	0	?
534	5.3587	11527.2	0	?	0	525	Calibration	-	534	5.3594	19905	0	?	0	525	Calibration	-	534	5.3585	7273.3	0	?	0	525	Calibration	-	534	5.3585	7365.32	0	?	0	525	Calibration	-	534	5.3592	5954.41	0	?	0	525	Calibration	-	534	5.3585	5149.19	0	?
535	5.3687	11464.4	0	?	0	525	Calibration	-	535	5.3694	19933.2	0	?	0	525	Calibration	-	535	5.3685	7267.51	0	?	0	525	Calibration	-	535	5.3685	7356.81	0	?	0	525	Calibration	-	535	5.3692	5956.57	0	?	0	525	Calibration	-	535	5.3685	5153.2	0	?
536	5.3788	11273.7	0	?	0	525	Calibration	-	536	5.3795	20083.2	0	?	0	525	Calibration	-	536	5.3785	7262.66	0	?	0	525	Calibration	-	536	5.3785	7350.77	0	?	0	525	Calibration	-	536	5.3792	5945.15	0	?	0	525	Calibration	-	536	5.3785	5165	0	?
537	5.3888	11236.5	0	?	0	525	Calibration	-	537	5.3895	20026.1	0	?	0	525	Calibration	-	537	5.3885	7265.48	0	?	0	525	Calibration	-	537	5.3885	7364.27	0	?	0	525	Calibration	-	537	5.3892	5928.56	0	?	0	525	Calibration	-	537	5.3885	5152.36	0	?
538	5.3988	11253.3	0	?	0	525	Calibration	-	538	5.3995	19995	0	?	0	525	Calibration	-	538	5.3985	7249.65	0	?	0	525	Calibration	-	538	5.3985	7381.72	0	?	0	525	Calibration	-	538	5.3993	5936.34	0	?	0	525	Calibration	-	538	5.3985	5139.84	0	?
539	5.4088	11276.4	0	?	0	525	Calibration	-	539	5.4095	20052.8	0	?	0	525	Calibration	-	539	5.4086	7249.87	0	?	0	525	Calibration	-	539	5.4086	7387.13	0	?	0	525	Calibration	-	539	5.4093	5951.79	0	?	0	525	Calibration	-	539	5.4086	5152.12	0	?
540	5.4188	11286.2	0	?	0	525	Calibration	-	540	5.4195	20132.7	0	?	0	525	Calibration	-	540	5.4186	7260.3	0	?	0	525	Calibration	-	540	5.4186	7397.72	0	?	0	525	Calibration	-	540	5.4193	5943.86	0	?	0	525	Calibration	-	540	5.4186	5152.09	0	?
541	5.4288	11328.2	0	?	0	525	Calibration	-	541	5.4296	20165.4	0	?	0	525	Calibration	-	541	5.4286	7266.28	0	?	0	525	Calibration	-	541	5.4286	7389.79	0	?	0	525	Calibration	-	541	5.4293	5924.13	0	?	0	525	Calibration	-	541	5.4286	5161.33	0	?
542	5.4389	11406.7	0	?	0	525	Calibration	-	542	5.4396	20018.6	0	?	0	525	Calibration	-	542	5.4386	7255.22	0	?	0	525	Calibration	-	542	5.4386	7381.74	0	?	0	525	Calibration	-	542	5.4393	5940.05	0	?	0	525	Calibration	-	542	5.4386	5170.46	0	?
543	5.4489	11516.7	0	?	0	525	Calibration	-	543	5.4496	20100.6	0	?	0	525	Calibration	-	543	5.4486	7273.94	0	?	0	525	Calibration	-	543	5.4486	7382.34	0	?	0	525	Calibration	-	543	5.4493	5931.07	0	?	0	525	Calibration	-	543	5.4486	5159.18	0	?
544	5.4589	11629.2	0	?	0	525	Calibration	-	544	5.4596	20242	0	?	0	525	Calibration	-	544	5.4586	7250.2	0	?	0	525	Calibration	-	544	5.4586	7378.43	0	?	0	525	Calibration	-	544	5.4594	5959.11	0	?	0	525	Calibration	-	544	5.4586	5147.52	0	?
545	5.4689	11531.5	0	?	0	525	Calibration	-	545	5.4696	20319.5	0	?	0	525	Calibration	-	545	5.4687	7250.44	0	?	0	525	Calibration	-	545	5.4687	7377.31	0	?	0	525	Calibration	-	545	5.4694	5933.13	0	?	0	525	Calibration	-	545	5.4687	5168.21	0	?
546	5.4789	11471.7	0	?	0	525	Calibration	-	546	5.4796	20235	0	?	0	525	Calibration	-	546	5.4787	7259.13	0	?	0	525	Calibration	-	546	5.4787	7372.75	0	?	0	525	Calibration	-	546	5.4794	5943.28	0	?	0	525	Calibration	-	546	5.4787	5153	0	?
547	5.4889	11517.2	0	?	0	525	Calibration	-	547	5.4897	20342.3	0	?	0	525	Calibration	-	547	5.4887	7262.32	0	?	0	525	Calibration	-	547	5.4887	7347.32	0	?	0	525	Calibration	-	547	5.4894	5926.03	0	?	0	525	Calibration	-	547	5.4887	5168.54	0	?
548	5.4989	11555.8	0	?	0	525	Calibration	-	548	5.4997	20449.2	0	?	0	525	Calibration	-	548	5.4987	7259.66	0	?	0	525	Calibration	-	548	5.4987	7347.75	0	?	0	525	Calibration	-	548	5.4994	5931.97	0	?	0	525	Calibration	-	548	5.4987	5160.02	0	?
549	5.509	11657.8	0	?	0	525	Calibration	-	549	5.5097	20449.7	0	?	0	525	Calibration	-	549	5.5087	7264.04	0	?	0	525	Calibration	-	549	5.5087	7340.77	0	?	0	525	Calibration	-	549	5.5094	5939.08	0	?	0	525	Calibration	-	549	5.5087	5168.26	0	?
550	5.519	11728.9	0	?	0	525	Calibration	-	550	5.5197	20439.3	0	?	0	525	Calibration	-	550	5.5187	7262.01	0	?	0	525	Calibration	-	550	5.5187	7340.87	0	?	0	525	Calibration	-	550	5.5195	5937.41	0	?	0	525	Calibration	-	550	5.5187	5165.81	0	?
551	5.529	11742.1	0	?	0	525	Calibration	-	551	5.5297	20355.2	0	?	0	525	Calibration	-	551	5.5288	7260.24	0	?	0	525	Calibration	-	551	5.5288	7328.17	0	?	0	525	Calibration	-	551	5.5295	5915.58	0	?	0	525	Calibration	-	551	5.5288	5147	0	?
552	5.539	11667	0	?	0	525	Calibration	-	552	5.5397	20376.2	0	?	0	525	Calibration	-	552	5.5388	7269.71	0	?	0	525	Calibration	-	552	5.5388	7334.8	0	?	0	525	Calibration	-	552	5.5395	5925.47	0	?	0	525	Calibration	-	552	5.5388	5147.7	0	?
553	5.549	11569.4	0	?	0	525	Calibration	-	553	5.5498	20465.6	0	?	0	525	Calibration	-	553	5.5488	7260.22	0	?	0	525	Calibration	-	553	5.5488	7336.64	0	?	0	525	Calibration	-	553	5.5495	5912.23	0	?	0	525	Calibration	-	553	5.5488	5152.68	0	?
554	5.559	11610.5	0	?	0	525	Calibration	-	554	5.5598	20590.9	0	?	0	525	Calibration	-	554	5.5588	7268.72	0	?	0	525	Calibration	-	554	5.5588	7352.93	0	?	0	525	Calibration	-	554	5.5595	5945.51	0	?	0	525	Calibration	-	554	5.5588	5147.11	0	?
555	5.5691	11657.1	0	?	0	525	Calibration	-	555	5.5698	20604.7	0	?	0	525	Calibration	-	555	5.5688	7259.25	0	?	0	525	Calibration	-	555	5.5688	7388.85	0	?	0	525	Calibration	-	555	5.5696	5921.8	0	?	0	525	Calibration	-	555	5.5688	5152.9	0	?
556	5.5791	11566.9	0	?	0	525	Calibration	-	556	5.5798	20634.1	0	?	0	525	Calibration	-	556	5.5788	7262.17	0	?	0	525	Calibration	-	556	5.5788	7373.51	0	?	0	525	Calibration	-	556	5.5796	5931.46	0	?	0	525	Calibration	-	556	5.5788	5161.16	0	?
557	5.5891	11469.2	0	?	0	525	Calibration	-	557	5.5898	20581.5	0	?	0	525	Calibration	-	557	5.5888	7245.93	0	?	0	525	Calibration	-	557	5.5888	7357.08	0	?	0	525	Calibration	-	557	5.5896	5927.35	0	?	0	525	Calibration	-	557	5.5888	5147.51	0	?
558	5.5991	11373.2	0	?	0	525	Calibration	-	558	5.5999	20486.7	0	?	0	525	Calibration	-	558	5.5989	7234.79	0	?	0	525	Calibration	-	558	5.5989	7377.01	0	?	0	525	Calibration	-	558	5.5996	5937.46	0	?	0	525	Calibration	-	558	5.5989	5141.73	0	?
559	5.6091	11381.5	0	?	0	525	Calibration	-	559	5.6099	20510.2	0	?	0	525	Calibration	-	559	5.6089	7236.54	0	?	0	525	Calibration	-	559	5.6089	7362.4	0	?	0	525	Calibration	-	559	5.6096	5920.08	0	?	0	525	Calibration	-	559	5.6089	5153.15	0	?
560	5.6191	11344.3	0	?	0	525	Calibration	-	560	5.6199	20645.9	0	?	0	525	Calibration	-	560	5.6189	7246.92	0	?	0	525	Calibration	-	560	5.6189	7344.36	0	?	0	525	Calibration	-	560	5.6196	5929.54	0	?	0	525	Calibration	-	560	5.6189	5159.95	0	?
561	5.6292	11298	0	?	0	525	Calibration	-	561	5.6299	20748.8	0	?	0	525	Calibration	-	561	5.6289	7284	0	?	0	525	Calibration	-	561	5.6289	7352.29	0	?	0	525	Calibration	-	561	5.6297	5915.73	0	?	0	525	Calibration	-	561	5.6289	5152.32	0	?
562	5.6392	11376.6	0	?	0	525	Calibration	-	562	5.6399	20860.1	0	?	0	525	Calibration	-	562	5.6389	7259.86	0	?	0	525	Calibration	-	562	5.6389	7356.49	0	?	0	525	Calibration	-	562	5.6397	5896.77	0	?	0	525	Calibration	-	562	5.6389	5153.86	0	?
563	5.6492	11517	0	?	0	525	Calibration	-	563	5.6499	21027.4	0	?	0	525	Calibration	-	563	5.6489	7260.44	0	?	0	525	Calibration	-	563	5.6489	7353.73	0	?	0	525	Calibration	-	563	5.6497	5916.47	0	?	0	525	Calibration	-	563	5.6489	5171.89	0	?
564	5.6592	11550.9	0	?	0	525	Calibration	-	564	5.66	21050.3	0	?	0	525	Calibration	-	564	5.659	7266.11	0	?	0	525	Calibration	-	564	5.659	7333.03	0	?	0	525	Calibration	-	564	5.6597	5906.97	0	?	0	525	Calibration	-	564	5.659	5166.54	0	?
565	5.6692	11593.1	0	?	0	525	Calibration	-	565	5.67	21101.5	0	?	0	525	Calibration	-	565	5.669	7260.63	0	?	0	525	Calibration	-	565	5.669	7342.4	0	?	0	525	Calibration	-	565	5.6697	5923.05	0	?	0	525	Calibration	-	565	5.669	5166.22	0	?
566	5.6792	11609.2	0	?	0	525	Calibration	-	566	5.68	21433.9	0	?	0	525	Calibration	-	566	5.679	7250.12	0	?	0	525	Calibration	-	566	5.679	7337.37	0	?	0	525	Calibration	-	566	5.6797	5950.2	0	?	0	525	Calibration	-	566	5.679	5158.98	0	?
567	5.6893	11608.2	0	?	0	525	Calibration	-	567	5.69	21797.8	0	?	0	525	Calibration	-	567	5.689	7255.77	0	?	0	525	Calibration	-	567	5.689	7344.39	0	?	0	525	Calibration	-	567	5.6898	5956.74	0	?	0	525	Calibration	-	567	5.689	5151.58	0	?
568	5.6993	11722	0	?	0	525	Calibration	-	568	5.7	21561	0	?	0	525	Calibration	-	568	5.699	7258.68	0	?	0	525	Calibration	-	568	5.699	7337.86	0	?	0	525	Calibration	-	568	5.6998	5947	0	?	0	525	Calibration	-	568	5.699	5154.77	0	?
569	5.7093	11672.5	0	?	0	525	Calibration	-	569	5.71	21224.3	0	?	0	525	Calibration	-	569	5.709	7270.73	0	?	0	525	Calibration	-	569	5.709	7331.92	0	?	0	525	Calibration	-	569	5.7098	5951.88	0	?	0	525	Calibration	-	569	5.709	5149.13	0	?
570	5.7193	11679.5	0	?	0	525	Calibration	-	570	5.7201	20963.1	0	?	0	525	Calibration	-	570	5.7191	7281.02	0	?	0	525	Calibration	-	570	5.7191	7325.47	0	?	0	525	Calibration	-	570	5.7198	5919.86	0	?	0	525	Calibration	-	570	5.7191	5152.76	0	?
571	5.7293	11681.8	0	?	0	525	Calibration	-	571	5.7301	21057.2	0	?	0	525	Calibration	-	571	5.7291	7260.93	0	?	0	525	Calibration	-	571	5.7291	7353.52	0	?	0	525	Calibration	-	571	5.7298	5917.3	0	?	0	525	Calibration	-	571	5.7291	5155.22	0	?
572	5.7393	11739.4	0	?	0	525	Calibration	-	572	5.7401	21125.1	0	?	0	525	Calibration	-	572	5.7391	7255.69	0	?	0	525	Calibration	-	572	5.7391	7332.53	0	?	0	525	Calibration	-	572	5.7398	5919.71	0	?	0	525	Calibration	-	572	5.7391	5146	0	?
573	5.7494	11759.8	0	?	0	525	Calibration	-	573	5.7501	21127.1	0	?	0	525	Calibration	-	573	5.7491	7247.02	0	?	0	525	Calibration	-	573	5.7491	7339.6	0	?	0	525	Calibration	-	573	5.7499	5914.37	0	?	0	525	Calibration	-	573	5.7491	5145.5	0	?
574	5.7594	11664.4	0	?	0	525	Calibration	-	574	5.7601	21303.5	0	?	0	525	Calibration	-	574	5.7591	7262.24	0	?	0	525	Calibration	-	574	5.7591	7323.68	0	?	0	525	Calibration	-	574	5.7599	5907.38	0	?	0	525	Calibration	-	574	5.7591	5150.98	0	?
575	5.7694	11432.7	0	?	0	525	Calibration	-	575	5.7701	21381.9	0	?	0	525	Calibration	-	575	5.7691	7252.27	0	?	0	525	Calibration	-	575	5.7691	7309.91	0	?	0	525	Calibration	-	575	5.7699	5919.58	0	?	0	525	Calibration	-	575	5.7691	5154.12	0	?
576	5.7794	11456.4	0	?	0	525	Calibration	-	576	5.7802	21311.5	0	?	0	525	Calibration	-	576	5.7792	7247.48	0	?	0	525	Calibration	-	576	5.7792	7298.61	0	?	0	525	Calibration	-	576	5.7799	5907.54	0	?	0	525	Calibration	-	576	5.7792	5151.41	0	?
577	5.7894	11489.4	0	?	0	525	Calibration	-	577	5.7902	21302.3	0	?	0	525	Calibration	-	577	5.7892	7264.54	0	?	0	525	Calibration	-	577	5.7892	7309.89	0	?	0	525	Calibration	-	577	5.7899	5921.17	0	?	0	525	Calibration	-	577	5.7892	5154.4	0	?
578	5.7994	11494.7	0	?	0	525	Calibration	-	578	5.8002	21158.5	0	?	0	525	Calibration	-	578	5.7992	7256.02	0	?	0	525	Calibration	-	578	5.7992	7317.17	0	?	0	525	Calibration	-	578	5.7999	5933.76	0	?	0	525	Calibration	-	578	5.7992	5166.06	0	?
579	5.8095	11497.8	0	?	0	525	Calibration	-	579	5.8102	21237.9	0	?	0	525	Calibration	-	579	5.8092	7242.49	0	?	0	525	Calibration	-	579	5.8092	7317.9	0	?	0	525	Calibration	-	579	5.81	5944.09	0	?	0	525	Calibration	-	579	5.8092	5164.14	0	?
580	5.8195	11426.9	0	?	0	525	Calibration	-	580	5.8202	21600.4	0	?	0	525	Calibration	-	580	5.8192	7253.71	0	?	0	525	Calibration	-	580	5.8192	7317.82	0	?	0	525	Calibration	-	580	5.82	5924.66	0	?	0	525	Calibration	-	580	5.8192	5147.48	0	?
581	5.8295	11500.3	0	?	0	525	Calibration	-	581	5.8303	21649	0	?	0	525	Calibration	-	581	5.8292	7267.21	0	?	0	525	Calibration	-	581	5.8292	7298.86	0	?	0	525	Calibration	-	581	5.83	5936.11	0	?	0	525	Calibration	-	581	5.8292	5152.95	0	?
582	5.8395	11564.5	0	?	0	525	Calibration	-	582	5.8403	21489	0	?	0	525	Calibration	-	582	5.8392	7264.2	0	?	0	525	Calibration	-	582	5.8392	7335.73	0	?	0	525	Calibration	-	582	5.84	5911.71	0	?	0	525	Calibration	-	582	5.8392	5167.53	0	?
583	5.8495	11685	0	?	0	525	Calibration	-	583	5.8503	21303.9	0	?	0	525	Calibration	-	583	5.8493	7260.95	0	?	0	525	Calibration	-	583	5.8493	7330.29	0	?	0	525	Calibration	-	583	5.85	5918.31	0	?	0	525	Calibration	-	583	5.8493	5141.5	0	?
584	5.8595	11739.7	0	?	0	525	Calibration	-	584	5.8603	21514	0	?	0	525	Calibration	-	584	5.8593	7257.97	0	?	0	525	Calibration	-	584	5.8593	7355.14	0	?	0	525	Calibration	-	584	5.8601	5881.93	0	?	0	525	Calibration	-	584	5.8593	5158.41	0	?
585	5.8696	11594.9	0	?	0	525	Calibration	-	585	5.8703	21797.3	0	?	0	525	Calibration	-	585	5.8693	7240.32	0	?	0	525	Calibration	-	585	5.8693	7359.44	0	?	0	525	Calibration	-	585	5.8701	5894.72	0	?	0	525	Calibration	-	585	5.8693	5162.57	0	?
586	5.8796	11533.3	0	?	0	525	Calibration	-	586	5.8803	21914.5	0	?	0	525	Calibration	-	586	5.8793	7263.84	0	?	0	525	Calibration	-	586	5.8793	7352.27	0	?	0	525	Calibration	-	586	5.8801	5911.72	0	?	0	525	Calibration	-	586	5.8793	5145.69	0	?
587	5.8896	11430.3	0	?	0	525	Calibration	-	587	5.8904	21916.3	0	?	0	525	Calibration	-	587	5.8893	7246.56	0	?	0	525	Calibration	-	587	5.8893	7390.94	0	?	0	525	Calibration	-	587	5.8901	5920.05	0	?	0	525	Calibration	-	587	5.8893	5157.21	0	?
588	5.8996	11309.3	0	?	0	525	Calibration	-	588	5.9004	21735.4	0	?	0	525	Calibration	-	588	5.8993	7237.51	0	?	0	525	Calibration	-	588	5.8993	7360.14	0	?	0	525	Calibration	-	588	5.9001	5901.77	0	?	0	525	Calibration	-	588	5.8993	5150.34	0	?
589	5.9096	11226.6	0	?	0	525	Calibration	-	589	5.9104	21698.5	0	?	0	525	Calibration	-	589	5.9094	7231.38	0	?	0	525	Calibration	-	589	5.9094	7362.74	0	?	0	525	Calibration	-	589	5.9101	5906.49	0	?	0	525	Calibration	-	589	5.9094	5134.77	0	?
590	5.9196	11205.4	0	?	0	525	Calibration	-	590	5.9204	21507.1	0	?	0	525	Calibration	-	590	5.9194	7236.72	0	?	0	525	Calibration	-	590	5.9194	7337.7	0	?	0	525	Calibration	-	590	5.9202	5913.95	0	?	0	525	Calibration	-	590	5.9194	5152.97	0	?
591	5.9296	11216	0	?	0	525	Calibration	-	591	5.9304	21260.5	0	?	0	525	Calibration	-	591	5.9294	7237.48	0	?	0	525	Calibration	-	591	5.9294	7335.22	0	?	0	525	Calibration	-	591	5.9302	5902.28	0	?	0	525	Calibration	-	591	5.9294	5143.76	0	?
592	5.9397	11203.1	0	?	0	525	Calibration	-	592	5.9404	21253.7	0	?	0	525	Calibration	-	592	5.9394	7258.36	0	?	0	525	Calibration	-	592	5.9394	7331.46	0	?	0	525	Calibration	-	592	5.9402	5921.55	0	?	0	525	Calibration	-	592	5.9394	5131.84	0	?
593	5.9497	11268.4	0	?	0	525	Calibration	-	593	5.9505	21131.3	0	?	0	525	Calibration	-	593	5.9494	7247.61	0	?	0	525	Calibration	-	593	5.9494	7337.76	0	?	0	525	Calibration	-	593	5.9502	5921.42	0	?	0	525	Calibration	-	593	5.9494	5149.98	0	?
594	5.9597	11345.9	0	?	0	525	Calibration	-	594	5.9605	20963.7	0	?	0	525	Calibration	-	594	5.9594	7261.48	0	?	0	525	Calibration	-	594	5.9594	7336.93	0	?	0	525	Calibration	-	594	5.9602	5940.27	0	?	0	525	Calibration	-	594	5.9594	5168.05	0	?
595	5.9697	11485.6	0	?	0	525	Calibration	-	595	5.9705	20989.6	0	?	0	525	Calibration	-	595	5.9695	7253.92	0	?	0	525	Calibration	-	595	5.9695	7307.37	0	?	0	525	Calibration	-	595	5.9702	5922.14	0	?	0	525	Calibration	-	595	5.9695	5144.91	0	?
596	5.9797	11643.2	0	?	0	525	Calibration	-	596	5.9805	21174.2	0	?	0	525	Calibration	-	596	5.9795	7255.03	0	?	0	525	Calibration	-	596	5.9795	7297.95	0	?	0	525	Calibration	-	596	5.9803	5922.84	0	?	0	525	Calibration	-	596	5.9795	5162.22	0	?
597	5.9897	11734.2	0	?	0	525	Calibration	-	597	5.9905	21243.5	0	?	0	525	Calibration	-	597	5.9895	7257.39	0	?	0	525	Calibration	-	597	5.9895	7299.29	0	?	0	525	Calibration	-	597	5.9903	5920.28	0	?	0	525	Calibration	-	597	5.9895	5138.03	0	?
598	5.9998	11789.1	0	?	0	525	Calibration	-	598	6.0006	21207.2	0	?	0	525	Calibration	-	598	5.9995	7258.37	0	?	0	525	Calibration	-	598	5.9995	7313.75	0	?	0	525	Calibration	-	598	6.0003	5931.31	0	?	0	525	Calibration	-	598	5.9995	5148.02	0	?
599	6.0098	11832.3	0	?	0	525	Calibration	-	599	6.0106	21252.6	0	?	0	525	Calibration	-	599	6.0095	7243.72	0	?	0	525	Calibration	-	599	6.0095	7305.68	0	?	0	525	Calibration	-	599	6.0103	5912.47	0	?	0	525	Calibration	-	599	6.0095	5146.94	0	?
600	6.0198	11861	0	?	0	525	Calibration	-	600	6.0206	21309.1	0	?	0	525	Calibration	-	600	6.0195	7253.95	0	?	0	525	Calibration	-	600	6.0195	7308.43	0	?	0	525	Calibration	-	600	6.0203	5921.5	0	?	0	525	Calibration	-	600	6.0195	5162.88	0	?
601	6.0298	11915.9	0	?	0	525	Calibration	-	601	6.0306	21348.2	0	?	0	525	Calibration	-	601	6.0295	7249.17	0	?	0	525	Calibration	-	601	6.0295	7302.05	0	?	0	525	Calibration	-	601	6.0303	5883.7	0	?	0	525	Calibration	-	601	6.0295	5154.95	0	?
602	6.0398	11920.9	0	?	0	525	Calibration	-	602	6.0406	21211.3	0	?	0	525	Calibration	-	602	6.0396	7239.83	0	?	0	525	Calibration	-	602	6.0396	7302.54	0	?	0	525	Calibration	-	602	6.0404	5909.27	0	?	0	525	Calibration	-	602	6.0396	5162.25	0	?
603	6.0498	11956.9	0	?	0	525	Calibration	-	603	6.0506	21411.2	0	?	0	525	Calibration	-	603	6.0496	7235.88	0	?	0	525	Calibration	-	603	6.0496	7323.57	0	?	0	525	Calibration	-	603	6.0504	5907.8	0	?	0	525	Calibration	-	603	6.0496	5163.67	0	?
604	6.0599	11920.5	0	?	0	525	Calibration	-	604	6.0607	21576.7	0	?	0	525	Calibration	-	604	6.0596	7229.08	0	?	0	525	Calibration	-	604	6.0596	7332.82	0	?	0	525	Calibration	-	604	6.0604	5919.58	0	?	0	525	Calibration	-	604	6.0596	5156.46	0	?
605	6.0699	11885.1	0	?	0	525	Calibration	-	605	6.0707	21525.8	0	?	0	525	Calibration	-	605	6.0696	7236.65	0	?	0	525	Calibration	-	605	6.0696	7337.89	0	?	0	525	Calibration	-	605	6.0704	5901.24	0	?	0	525	Calibration	-	605	6.0696	5167.95	0	?
606	6.0799	11798.2	0	?	0	525	Calibration	-	606	6.0807	21465.5	0	?	0	525	Calibration	-	606	6.0796	7256.65	0	?	0	525	Calibration	-	606	6.0796	7330.18	0	?	0	525	Calibration	-	606	6.0804	5927.56	0	?	0	525	Calibration	-	606	6.0796	5159.3	0	?
607	6.0899	11788.9	0	?	0	525	Calibration	-	607	6.0907	21451.7	0	?	0	525	Calibration	-	607	6.0896	7243.69	0	?	0	525	Calibration	-	607	6.0896	7299.95	0	?	0	525	Calibration	-	607	6.0904	5924.67	0	?	0	525	Calibration	-	607	6.0896	5153.62	0	?
608	6.0999	11682.2	0	?	0	525	Calibration	-	608	6.1007	21299.5	0	?	0	525	Calibration	-	608	6.0997	7240.56	0	?	0	525	Calibration	-	608	6.0997	7287.55	0	?	0	525	Calibration	-	608	6.1005	5930.99	0	?	0	525	Calibration	-	608	6.0997	5155.44	0	?
609	6.1099	11594.9	0	?	0	525	Calibration	-	609	6.1107	21212.9	0	?	0	525	Calibration	-	609	6.1097	7232.86	0	?	0	525	Calibration	-	609	6.1097	7299.88	0	?	0	525	Calibration	-	609	6.1105	5904.94	0	?	0	525	Calibration	-	609	6.1097	5167.1	0	?
610	6.12	11403.7	0	?	0	525	Calibration	-	610	6.1208	21031.4	0	?	0	525	Calibration	-	610	6.1197	7233.12	0	?	0	525	Calibration	-	610	6.1197	7296.36	0	?	0	525	Calibration	-	610	6.1205	5898.75	0	?	0	525	Calibration	-	610	6.1197	5166.6	0	?
611	6.13	11350.8	0	?	0	525	Calibration	-	611	6.1308	21012.6	0	?	0	525	Calibration	-	611	6.1297	7233.12	0	?	0	525	Calibration	-	611	6.1297	7308.74	0	?	0	525	Calibration	-	611	6.1305	5894.38	0	?	0	525	Calibration	-	611	6.1297	5166.05	0	?
612	6.14	11303.4	0	?	0	525	Calibration	-	612	6.1408	21223	0	?	0	525	Calibration	-	612	6.1397	7224.13	0	?	0	525	Calibration	-	612	6.1397	7299.36	0	?	0	525	Calibration	-	612	6.1405	5892.28	0	?	0	525	Calibration	-	612	6.1397	5145.59	0	?
613	6.15	11357.9	0	?	0	525	Calibration	-	613	6.1508	21365.5	0	?	0	525	Calibration	-	613	6.1497	7227.14	0	?	0	525	Calibration	-	613	6.1497	7292.95	0	?	0	525	Calibration	-	613	6.1505	5897.23	0	?	0	525	Calibration	-	613	6.1497	5174.43	0	?
614	6.16	11347.5	0	?	0	525	Calibration	-	614	6.1608	21311.2	0	?	0	525	Calibration	-	614	6.1598	7233.65	0	?	0	525	Calibration	-	614	6.1598	7319.57	0	?	0	525	Calibration	-	614	6.1606	5891	0	?	0	525	Calibration	-	614	6.1598	5176.86	0	?
615	6.17	11227	0	?	0	525	Calibration	-	615	6.1709	21370	0	?	0	525	Calibration	-	615	6.1698	7227.78	0	?	0	525	Calibration	-	615	6.1698	7309.19	0	?	0	525	Calibration	-	615	6.1706	5897.45	0	?	0	525	Calibration	-	615	6.1698	5162.57	0	?
616	6.1801	11131.8	0	?	0	525	Calibration	-	616	6.1809	21257.1	0	?	0	525	Calibration	-	616	6.1798	7237.64	0	?	0	525	Calibration	-	616	6.1798	7311.43	0	?	0	525	Calibration	-	616	6.1806	5890.47	0	?	0	525	Calibration	-	616	6.1798	5167.24	0	?
617	6.1901	11092.4	0	?	0	525	Calibration	-	617	6.1909	21166.5	0	?	0	525	Calibration	-	617	6.1898	7235.88	0	?	0	525	Calibration	-	617	6.1898	7312.74	0	?	0	525	Calibration	-	617	6.1906	5878.8	0	?	0	525	Calibration	-	617	6.1898	5146.29	0	?
618	6.2001	11115.4	0	?	0	525	Calibration	-	618	6.2009	21128.7	0	?	0	525	Calibration	-	618	6.1998	7251.53	0	?	0	525	Calibration	-	618	6.1998	7305.17	0	?	0	525	Calibration	-	618	6.2006	5888.71	0	?	0	525	Calibration	-	618	6.1998	5155.22	0	?
619	6.2101	11021.2	0	?	0	525	Calibration	-	619	6.2109	21059.5	0	?	0	525	Calibration	-	619	6.2098	7246.59	0	?	0	525	Calibration	-	619	6.2098	7325.25	0	?	0	525	Calibration	-	619	6.2107	5890.99	0	?	0	525	Calibration	-	619	6.2098	5149.56	0	?
620	6.2201	10935.6	0	?	0	525	Calibration	-	620	6.2209	21104.8	0	?	0	525	Calibration	-	620	6.2198	7246.35	0	?	0	525	Calibration	-	620	6.2198	7304.67	0	?	0	525	Calibration	-	620	6.2207	5911.53	0	?	0	525	Calibration	-	620	6.2198	5149.71	0	?
621	6.2301	10981.1	0	?	0	525	Calibration	-	621	6.231	20986.5	0	?	0	525	Calibration	-	621	6.2299	7248.72	0	?	0	525	Calibration	-	621	6.2299	7312.14	0	?	0	525	Calibration	-	621	6.2307	5891.43	0	?	0	525	Calibration	-	621	6.2299	5165.12	0	?
622	6.2402	11068.6	0	?	0	525	Calibration	-	622	6.241	21158.6	0	?	0	525	Calibration	-	622	6.2399	7238.98	0	?	0	525	Calibration	-	622	6.2399	7317.34	0	?	0	525	Calibration	-	622	6.2407	5909.69	0	?	0	525	Calibration	-	622	6.2399	5147.14	0	?
623	6.2502	11084.1	0	?	0	525	Calibration	-	623	6.251	21357	0	?	0	525	Calibration	-	623	6.2499	7236.76	0	?	0	525	Calibration	-	623	6.2499	7316.05	0	?	0	525	Calibration	-	623	6.2507	5882.32	0	?	0	525	Calibration	-	623	6.2499	5137.7	0	?
624	6.2602	11116	0	?	0	525	Calibration	-	624	6.261	21351	0	?	0	525	Calibration	-	624	6.2599	7250.42	0	?	0	525	Calibration	-	624	6.2599	7291.48	0	?	0	525	Calibration	-	624	6.2607	5896.21	0	?	0	525	Calibration	-	624	6.2599	5149.97	0	?
625	6.2702	11098.5	0	?	0	525	Calibration	-	625	6.271	21234.7	0	?	0	525	Calibration	-	625	6.2699	7244.51	0	?	0	525	Calibration	-	625	6.2699	7301.5	0	?	0	525	Calibration	-	625	6.2708	5896.37	0	?	0	525	Calibration	-	625	6.2699	5156.13	0	?
626	6.2802	11049.6	0	?	0	525	Calibration	-	626	6.281	21156.1	0	?	0	525	Calibration	-	626	6.2799	7231.71	0	?	0	525	Calibration	-	626	6.2799	7312.32	0	?	0	525	Calibration	-	626	6.2808	5878.98	0	?	0	525	Calibration	-	626	6.2799	5161.17	0	?
627	6.2902	11031.1	0	?	0	525	Calibration	-	627	6.2911	21100.3	0	?	0	525	Calibration	-	627	6.29	7244.37	0	?	0	525	Calibration	-	627	6.29	7331.04	0	?	0	525	Calibration	-	627	6.2908	5886.23	0	?	0	525	Calibration	-	627	6.29	5146.77	0	?
628	6.3003	11053.2	0	?	0	525	Calibration	-	628	6.3011	21165.2	0	?	0	525	Calibration	-	628	6.3	7244.92	0	?	0	525	Calibration	-	628	6.3	7314.83	0	?	0	525	Calibration	-	628	6.3008	5878.71	0	?	0	525	Calibration	-	628	6.3	5149.32	0	?
629	6.3103	11063.9	0	?	0	525	Calibration	-	629	6.3111	21385.8	0	?	0	525	Calibration	-	629	6.31	7246.83	0	?	0	525	Calibration	-	629	6.31	7301.59	0	?	0	525	Calibration	-	629	6.3108	5886.45	0	?	0	525	Calibration	-	629	6.31	5159.13	0	?
630	6.3203	11072.6	0	?	0	525	Calibration	-	630	6.3211	21633.9	0	?	0	525	Calibration	-	630	6.32	7226.26	0	?	0	525	Calibration	-	630	6.32	7322.57	0	?	0	525	Calibration	-	630	6.3208	5894.29	0	?	0	525	Calibration	-	630	6.32	5138.92	0	?
631	6.3303	11092.4	0	?	0	525	Calibration	-	631	6.3311	21462.8	0	?	0	525	Calibration	-	631	6.33	7224.13	0	?	0	525	Calibration	-	631	6.33	7340.5	0	?	0	525	Calibration	-	631	6.3309	5870.54	0	?	0	525	Calibration	-	631	6.33	5156.34	0	?
632	6.3403	11002.7	0	?	0	525	Calibration	-	632	6.3412	21129.2	0	?	0	525	Calibration	-	632	6.34	7233.4	0	?	0	525	Calibration	-	632	6.34	7314.15	0	?	0	525	Calibration	-	632	6.3409	5873.63	0	?	0	525	Calibration	-	632	6.34	5141.22	0	?
633	6.3503	10979.8	0	?	0	525	Calibration	-	633	6.3512	20911.8	0	?	0	525	Calibration	-	633	6.3501	7241.62	0	?	0	525	Calibration	-	633	6.3501	7287.85	0	?	0	525	Calibration	-	633	6.3509	5876.12	0	?	0	525	Calibration	-	633	6.3501	5132.54	0	?
634	6.3604	11057.1	0	?	0	525	Calibration	-	634	6.3612	20794.5	0	?	0	525	Calibration	-	634	6.3601	7239.62	0	?	0	525	Calibration	-	634	6.3601	7279	0	?	0	525	Calibration	-	634	6.3609	5877.01	0	?	0	525	Calibration	-	634	6.3601	5136.49	0	?
635	6.3704	11110.1	0	?	0	525	Calibration	-	635	6.3712	20758.3	0	?	0	525	Calibration	-	635	6.3701	7222.2	0	?	0	525	Calibration	-	635	6.3701	7287.51	0	?	0	525	Calibration	-	635	6.3709	5874.08	0	?	0	525	Calibration	-	635	6.3701	5162.47	0	?
636	6.3804	11191.9	0	?	0	525	Calibration	-	636	6.3812	20930	0	?	0	525	Calibration	-	636	6.3801	7238.72	0	?	0	525	Calibration	-	636	6.3801	7295.37	0	?	0	525	Calibration	-	636	6.3809	5892.26	0	?	0	525	Calibration	-	636	6.3801	5156.57	0	?
637	6.3904	11195.4	0	?	0	525	Calibration	-	637	6.3912	20999.8	0	?	0	525	Calibration	-	637	6.3901	7231.81	0	?	0	525	Calibration	-	637	6.3901	7320.12	0	?	0	525	Calibration	-	637	6.391	5885.12	0	?	0	525	Calibration	-	637	6.3901	5150.98	0	?
638	6.4004	11174.2	0	?	0	525	Calibration	-	638	6.4013	21170.3	0	?	0	525	Calibration	-	638	6.4001	7245.55	0	?	0	525	Calibration	-	638	6.4001	7315.7	0	?	0	525	Calibration	-	638	6.401	5861.59	0	?	0	525	Calibration	-	638	6.4001	5135.98	0	?
639	6.4104	11275.3	0	?	0	525	Calibration	-	639	6.4113	21498.2	0	?	0	525	Calibration	-	639	6.4101	7239.07	0	?	0	525	Calibration	-	639	6.4101	7306.66	0	?	0	525	Calibration	-	639	6.411	5882.68	0	?	0	525	Calibration	-	639	6.4101	5135.06	0	?
640	6.4204	11264.6	0	?	0	525	Calibration	-	640	6.4213	21320.3	0	?	0	525	Calibration	-	640	6.4202	7232.29	0	?	0	525	Calibration	-	640	6.4202	7294.26	0	?	0	525	Calibration	-	640	6.421	5904.27	0	?	0	525	Calibration	-	640	6.4202	5147.45	0	?
641	6.4305	11233.1	0	?	0	525	Calibration	-	641	6.4313	21026.3	0	?	0	525	Calibration	-	641	6.4302	7214.89	0	?	0	525	Calibration	-	641	6.4302	7291.49	0	?	0	525	Calibration	-	641	6.431	5888.89	0	?	0	525	Calibration	-	641	6.4302	5128.25	0	?
642	6.4405	11282.2	0	?	0	525	Calibration	-	642	6.4413	20856.2	0	?	0	525	Calibration	-	642	6.4402	7231.17	0	?	0	525	Calibration	-	642	6.4402	7278.66	0	?	0	525	Calibration	-	642	6.441	5902.2	0	?	0	525	Calibration	-	642	6.4402	5132.48	0	?
643	6.4505	11359.8	0	?	0	525	Calibration	-	643	6.4513	21064.2	0	?	0	525	Calibration	-	643	6.4502	7222.06	0	?	0	525	Calibration	-	643	6.4502	7261.05	0	?	0	525	Calibration	-	643	6.4511	5887.44	0	?	0	525	Calibration	-	643	6.4502	5147.86	0	?
644	6.4605	11572	0	?	0	525	Calibration	-	644	6.4614	21097.5	0	?	0	525	Calibration	-	644	6.4602	7218	0	?	0	525	Calibration	-	644	6.4602	7268.41	0	?	0	525	Calibration	-	644	6.4611	5898.58	0	?	0	525	Calibration	-	644	6.4602	5135.79	0	?
645	6.4705	11686.7	0	?	0	525	Calibration	-	645	6.4714	21266	0	?	0	525	Calibration	-	645	6.4702	7215.37	0	?	0	525	Calibration	-	645	6.4702	7265.85	0	?	0	525	Calibration	-	645	6.4711	5871.72	0	?	0	525	Calibration	-	645	6.4702	5159.82	0	?
646	6.4805	11532.9	0	?	0	525	Calibration	-	646	6.4814	21311	0	?	0	525	Calibration	-	646	6.4803	7202.34	0	?	0	525	Calibration	-	646	6.4803	7274.01	0	?	0	525	Calibration	-	646	6.4811	5881.76	0	?	0	525	Calibration	-	646	6.4803	5152.86	0	?
647	6.4906	11419.6	0	?	0	525	Calibration	-	647	6.4914	21295.2	0	?	0	525	Calibration	-	647	6.4903	7215.74	0	?	0	525	Calibration	-	647	6.4903	7290.91	0	?	0	525	Calibration	-	647	6.4911	5856.28	0	?	0	525	Calibration	-	647	6.4903	5161.47	0	?
648	6.5006	11362.3	0	?	0	525	Calibration	-	648	6.5014	21525.9	0	?	0	525	Calibration	-	648	6.5003	7199.8	0	?	0	525	Calibration	-	648	6.5003	7282.93	0	?	0	525	Calibration	-	648	6.5012	5873.75	0	?	0	525	Calibration	-	648	6.5003	5150.06	0	?
649	6.5106	11394.6	0	?	0	525	Calibration	-	649	6.5115	21493.3	0	?	0	525	Calibration	-	649	6.5103	7197.32	0	?	0	525	Calibration	-	649	6.5103	7288.86	0	?	0	525	Calibration	-	649	6.5112	5881.35	0	?	0	525	Calibration	-	649	6.5103	5130.45	0	?
650	6.5206	11497	0	?	0	525	Calibration	-	650	6.5215	21429.1	0	?	0	525	Calibration	-	650	6.5203	7202.35	0	?	0	525	Calibration	-	650	6.5203	7265.98	0	?	0	525	Calibration	-	650	6.5212	5867.99	0	?	0	525	Calibration	-	650	6.5203	5129.9	0	?
651	6.5306	11288.5	0	?	0	525	Calibration	-	651	6.5315	21307.2	0	?	0	525	Calibration	-	651	6.5303	7196.1	0	?	0	525	Calibration	-	651	6.5303	7257.85	0	?	0	525	Calibration	-	651	6.5312	5884.78	0	?	0	525	Calibration	-	651	6.5303	5144.03	0	?
652	6.5406	11239.3	0	?	0	525	Calibration	-	652	6.5415	21257.4	0	?	0	525	Calibration	-	652	6.5404	7176.87	0	?	0	525	Calibration	-	652	6.5404	7267.52	0	?	0	525	Calibration	-	652	6.5412	5897.5	0	?	0	525	Calibration	-	652	6.5404	5135.83	0	?
653	6.5507	11235.2	0	?	0	525	Calibration	-	653	6.5515	21203.6	0	?	0	525	Calibration	-	653	6.5504	7180.8	0	?	0	525	Calibration	-	653	6.5504	7252.7	0	?	0	525	Calibration	-	653	6.5512	5894.18	0	?	0	525	Calibration	-	653	6.5504	5140.45	0	?
654	6.5607	11221.6	0	?	0	525	Calibration	-	654	6.5615	21088.1	0	?	0	525	Calibration	-	654	6.5604	7194.35	0	?	0	525	Calibration	-	654	6.5604	7265.02	0	?	0	525	Calibration	-	654	6.5613	5881.28	0	?	0	525	Calibration	-	654	6.5604	5126.92	0	?
655	6.5707	11329.1	0	?	0	525	Calibration	-	655	6.5716	21072.6	0	?	0	525	Calibration	-	655	6.5704	7202.87	0	?	0	525	Calibration	-	655	6.5704	7282.4	0	?	0	525	Calibration	-	655	6.5713	5897.98	0	?	0	525	Calibration	-	655	6.5704	5128.92	0	?
656	6.5807	11423.7	0	?	0	525	Calibration	-	656	6.5816	21106.8	0	?	0	525	Calibration	-	656	6.5804	7200.34	0	?	0	525	Calibration	-	656	6.5804	7291.61	0	?	0	525	Calibration	-	656	6.5813	5901.11	0	?	0	525	Calibration	-	656	6.5804	5144.97	0	?
657	6.5907	11511.6	0	?	0	525	Calibration	-	657	6.5916	21044.4	0	?	0	525	Calibration	-	657	6.5904	7214.3	0	?	0	525	Calibration	-	657	6.5904	7297.57	0	?	0	525	Calibration	-	657	6.5913	5877.96	0	?	0	525	Calibration	-	657	6.5904	5142.61	0	?
658	6.6007	11543.5	0	?	0	525	Calibration	-	658	6.6016	20980.2	0	?	0	525	Calibration	-	658	6.6005	7217.85	0	?	0	525	Calibration	-	658	6.6005	7289.21	0	?	0	525	Calibration	-	658	6.6013	5877.8	0	?	0	525	Calibration	-	658	6.6005	5137.86	0	?
659	6.6108	11411.5	0	?	0	525	Calibration	-	659	6.6116	20926.1	0	?	0	525	Calibration	-	659	6.6105	7204.39	0	?	0	525	Calibration	-	659	6.6105	7280.7	0	?	0	525	Calibration	-	659	6.6113	5881.79	0	?	0	525	Calibration	-	659	6.6105	5138.31	0	?
660	6.6208	11305.8	0	?	0	525	Calibration	-	660	6.6216	20827	0	?	0	525	Calibration	-	660	6.6205	7191.5	0	?	0	525	Calibration	-	660	6.6205	7280.06	0	?	0	525	Calibration	-	660	6.6214	5864.71	0	?	0	525	Calibration	-	660	6.6205	5131.94	0	?
661	6.6308	11320.6	0	?	0	525	Calibration	-	661	6.6317	20637.4	0	?	0	525	Calibration	-	661	6.6305	7212.44	0	?	0	525	Calibration	-	661	6.6305	7261.41	0	?	0	525	Calibration	-	661	6.6314	5860.23	0	?	0	525	Calibration	-	661	6.6305	5142.15	0	?
662	6.6408	11288.8	0	?	0	525	Calibration	-	662	6.6417	20648.3	0	?	0	525	Calibration	-	662	6.6405	7205.59	0	?	0	525	Calibration	-	662	6.6405	7260.09	0	?	0	525	Calibration	-	662	6.6414	5869.1	0	?	0	525	Calibration	-	662	6.6405	5144.85	0	?
663	6.6508	11324.2	0	?	0	525	Calibration	-	663	6.6517	20864.2	0	?	0	525	Calibration	-	663	6.6505	7209.04	0	?	0	525	Calibration	-	663	6.6505	7287.38	0	?	0	525	Calibration	-	663	6.6514	5879.47	0	?	0	525	Calibration	-	663	6.6505	5122.75	0	?
664	6.6608	11318.6	0	?	0	525	Calibration	-	664	6.6617	21006.8	0	?	0	525	Calibration	-	664	6.6605	7215.1	0	?	0	525	Calibration	-	664	6.6605	7291.6	0	?	0	525	Calibration	-	664	6.6614	5877.21	0	?	0	525	Calibration	-	664	6.6605	5146.58	0	?
665	6.6709	11199.6	0	?	0	525	Calibration	-	665	6.6717	21082.7	0	?	0	525	Calibration	-	665	6.6706	7200.04	0	?	0	525	Calibration	-	665	6.6706	7292.41	0	?	0	525	Calibration	-	665	6.6714	5858.11	0	?	0	525	Calibration	-	665	6.6706	5125.11	0	?
666	6.6809	11229.7	0	?	0	525	Calibration	-	666	6.6818	20975.9	0	?	0	525	Calibration	-	666	6.6806	7204.56	0	?	0	525	Calibration	-	666	6.6806	7276.36	0	?	0	525	Calibration	-	666	6.6815	5838.37	0	?	0	525	Calibration	-	666	6.6806	5141.27	0	?
667	6.6909	11315.3	0	?	0	525	Calibration	-	667	6.6918	20905.3	0	?	0	525	Calibration	-	667	6.6906	7199.43	0	?	0	525	Calibration	-	667	6.6906	7291.92	0	?	0	525	Calibration	-	667	6.6915	5845.57	0	?	0	525	Calibration	-	667	6.6906	5135.27	0	?
668	6.7009	11374.4	0	?	0	525	Calibration	-	668	6.7018	20760.9	0	?	0	525	Calibration	-	668	6.7006	7203.8	0	?	0	525	Calibration	-	668	6.7006	7283.24	0	?	0	525	Calibration	-	668	6.7015	5871.73	0	?	0	525	Calibration	-	668	6.7006	5137.66	0	?
669	6.7109	11455.6	0	?	0	525	Calibration	-	669	6.7118	20656.3	0	?	0	525	Calibration	-	669	6.7106	7217.79	0	?	0	525	Calibration	-	669	6.7106	7297.29	0	?	0	525	Calibration	-	669	6.7115	5864.98	0	?	0	525	Calibration	-	669	6.7106	5128.2	0	?
670	6.7209	11504.8	0	?	0	525	Calibration	-	670	6.7218	20664	0	?	0	525	Calibration	-	670	6.7206	7213.19	0	?	0	525	Calibration	-	670	6.7206	7315.96	0	?	0	525	Calibration	-	670	6.7215	5870.92	0	?	0	525	Calibration	-	670	6.7206	5149.71	0	?
671	6.731	11535	0	?	0	525	Calibration	-	671	6.7318	21005.1	0	?	0	525	Calibration	-	671	6.7307	7199.35	0	?	0	525	Calibration	-	671	6.7307	7306.26	0	?	0	525	Calibration	-	671	6.7315	5897.73	0	?	0	525	Calibration	-	671	6.7307	5137.66	0	?
672	6.741	11541.3	0	?	0	525	Calibration	-	672	6.7419	21131.1	0	?	0	525	Calibration	-	672	6.7407	7201.25	0	?	0	525	Calibration	-	672	6.7407	7290.01	0	?	0	525	Calibration	-	672	6.7416	5879.19	0	?	0	525	Calibration	-	672	6.7407	5136.26	0	?
673	6.751	11373.8	0	?	0	525	Calibration	-	673	6.7519	21049.6	0	?	0	525	Calibration	-	673	6.7507	7208.79	0	?	0	525	Calibration	-	673	6.7507	7289.95	0	?	0	525	Calibration	-	673	6.7516	5897.02	0	?	0	525	Calibration	-	673	6.7507	5138.11	0	?
674	6.761	11347.2	0	?	0	525	Calibration	-	674	6.7619	20768.1	0	?	0	525	Calibration	-	674	6.7607	7207.83	0	?	0	525	Calibration	-	674	6.7607	7316.71	0	?	0	525	Calibration	-	674	6.7616	5874.26	0	?	0	525	Calibration	-	674	6.7607	5128.66	0	?
675	6.771	11358.2	0	?	0	525	Calibration	-	675	6.7719	20717.2	0	?	0	525	Calibration	-	675	6.7707	7211.03	0	?	0	525	Calibration	-	675	6.7707	7312.33	0	?	0	525	Calibration	-	675	6.7716	5889.12	0	?	0	525	Calibration	-	675	6.7707	5144	0	?
676	6.781	11328.9	0	?	0	525	Calibration	-	676	6.7819	20909.1	0	?	0	525	Calibration	-	676	6.7807	7214.66	0	?	0	525	Calibration	-	676	6.7807	7284.47	0	?	0	525	Calibration	-	676	6.7816	5883.19	0	?	0	525	Calibration	-	676	6.7807	5139.65	0	?
677	6.7911	11340.5	0	?	0	525	Calibration	-	677	6.7919	20906.2	0	?	0	525	Calibration	-	677	6.7908	7223.38	0	?	0	525	Calibration	-	677	6.7908	7285.05	0	?	0	525	Calibration	-	677	6.7916	5890.37	0	?	0	525	Calibration	-	677	6.7908	5116.41	0	?
678	6.8011	11328.6	0	?	0	525	Calibration	-	678	6.802	20674	0	?	0	525	Calibration	-	678	6.8008	7202.22	0	?	0	525	Calibration	-	678	6.8008	7272.32	0	?	0	525	Calibration	-	678	6.8017	5872.17	0	?	0	525	Calibration	-	678	6.8008	5153.17	0	?
679	6.8111	11380.5	0	?	0	525	Calibration	-	679	6.812	20397.4	0	?	0	525	Calibration	-	679	6.8108	7209.08	0	?	0	525	Calibration	-	679	6.8108	7291.52	0	?	0	525	Calibration	-	679	6.8117	5865.06	0	?	0	525	Calibration	-	679	6.8108	5132.06	0	?
680	6.8211	11349.8	0	?	0	525	Calibration	-	680	6.822	20369	0	?	0	525	Calibration	-	680	6.8208	7206.34	0	?	0	525	Calibration	-	680	6.8208	7292.52	0	?	0	525	Calibration	-	680	6.8217	5882.92	0	?	0	525	Calibration	-	680	6.8208	5109.84	0	?
681	6.8311	11225.4	0	?	0	525	Calibration	-	681	6.832	20650	0	?	0	525	Calibration	-	681	6.8308	7216.75	0	?	0	525	Calibration	-	681	6.8308	7270.31	0	?	0	525	Calibration	-	681	6.8317	5874.98	0	?	0	525	Calibration	-	681	6.8308	5142.79	0	?
682	6.8411	11138.9	0	?	0	525	Calibration	-	682	6.842	20661.3	0	?	0	525	Calibration	-	682	6.8408	7196.98	0	?	0	525	Calibration	-	682	6.8408	7258.05	0	?	0	525	Calibration	-	682	6.8417	5883.17	0	?	0	525	Calibration	-	682	6.8408	5140.04	0	?
683	6.8511	11079.6	0	?	0	525	Calibration	-	683	6.8521	20621.3	0	?	0	525	Calibration	-	683	6.8508	7202.63	0	?	0	525	Calibration	-	683	6.8508	7271.54	0	?	0	525	Calibration	-	683	6.8518	5875.81	0	?	0	525	Calibration	-	683	6.8508	5136.76	0	?
684	6.8612	11006.3	0	?	0	525	Calibration	-	684	6.8621	20573.9	0	?	0	525	Calibration	-	684	6.8609	7198.89	0	?	0	525	Calibration	-	684	6.8609	7286.87	0	?	0	525	Calibration	-	684	6.8618	5890.38	0	?	0	525	Calibration	-	684	6.8609	5139.14	0	?
685	6.8712	10960	0	?	0	525	Calibration	-	685	6.8721	20606.2	0	?	0	525	Calibration	-	685	6.8709	7179.77	0	?	0	525	Calibration	-	685	6.8709	7281.48	0	?	0	525	Calibration	-	685	6.8718	5903.98	0	?	0	525	Calibration	-	685	6.8709	5132.43	0	?
686	6.8812	10968.4	0	?	0	525	Calibration	-	686	6.8821	20724.8	0	?	0	525	Calibration	-	686	6.8809	7183.59	0	?	0	525	Calibration	-	686	6.8809	7266.16	0	?	0	525	Calibration	-	686	6.8818	5889.53	0	?	0	525	Calibration	-	686	6.8809	5150.97	0	?
687	6.8912	10980.1	0	?	0	525	Calibration	-	687	6.8921	20880.1	0	?	0	525	Calibration	-	687	6.8909	7190.85	0	?	0	525	Calibration	-	687	6.8909	7257.29	0	?	0	525	Calibration	-	687	6.8918	5883.85	0	?	0	525	Calibration	-	687	6.8909	5148.86	0	?
688	6.9012	11029.4	0	?	0	525	Calibration	-	688	6.9021	20982.3	0	?	0	525	Calibration	-	688	6.9009	7218.35	0	?	0	525	Calibration	-	688	6.9009	7222.06	0	?	0	525	Calibration	-	688	6.9018	5889.98	0	?	0	525	Calibration	-	688	6.9009	5150.23	0	?
689	6.9112	11067.3	0	?	0	525	Calibration	-	689	6.9122	21039.8	0	?	0	525	Calibration	-	689	6.9109	7205.09	0	?	0	525	Calibration	-	689	6.9109	7212.31	0	?	0	525	Calibration	-	689	6.9119	5887.32	0	?	0	525	Calibration	-	689	6.9109	5126.66	0	?
690	6.9213	11106.2	0	?	0	525	Calibration	-	690	6.9222	21266.5	0	?	0	525	Calibration	-	690	6.921	7186.92	0	?	0	525	Calibration	-	690	6.921	7223.87	0	?	0	525	Calibration	-	690	6.9219	5876.48	0	?	0	525	Calibration	-	690	6.921	5131.08	0	?
691	6.9313	11150.1	0	?	0	525	Calibration	-	691	6.9322	21367.6	0	?	0	525	Calibration	-	691	6.931	7207.81	0	?	0	525	Calibration	-	691	6.931	7238.82	0	?	0	525	Calibration	-	691	6.9319	5859.59	0	?	0	525	Calibration	-	691	6.931	5136.97	0	?
692	6.9413	11199.1	0	?	0	525	Calibration	-	692	6.9422	21065.3	0	?	0	525	Calibration	-	692	6.941	7216.89	0	?	0	525	Calibration	-	692	6.941	7212.45	0	?	0	525	Calibration	-	692	6.9419	5844.42	0	?	0	525	Calibration	-	692	6.941	5120.62	0	?
693	6.9513	11201.2	0	?	0	525	Calibration	-	693	6.9522	20689.6	0	?	0	525	Calibration	-	693	6.951	7204.93	0	?	0	525	Calibration	-	693	6.951	7217.22	0	?	0	525	Calibration	-	693	6.9519	5865.38	0	?	0	525	Calibration	-	693	6.951	5130.91	0	?
694	6.9613	11166.9	0	?	0	525	Calibration	-	694	6.9622	20673.6	0	?	0	525	Calibration	-	694	6.961	7199.4	0	?	0	525	Calibration	-	694	6.961	7200.17	0	?	0	525	Calibration	-	694	6.9619	5878.26	0	?	0	525	Calibration	-	694	6.961	5123.65	0	?
695	6.9713	11122.8	0	?	0	525	Calibration	-	695	6.9723	20642.5	0	?	0	525	Calibration	-	695	6.971	7200.88	0	?	0	525	Calibration	-	695	6.971	7206.58	0	?	0	525	Calibration	-	695	6.972	5874.59	0	?	0	525	Calibration	-	695	6.971	5130.19	0	?
696	6.9814	11032.6	0	?	0	525	Calibration	-	696	6.9823	20696.4	0	?	0	525	Calibration	-	696	6.9811	7213.08	0	?	0	525	Calibration	-	696	6.9811	7217.01	0	?	0	525	Calibration	-	696	6.982	5887.76	0	?	0	525	Calibration	-	696	6.9811	5133.76	0	?
697	6.9914	11004	0	?	0	525	Calibration	-	697	6.9923	20821	0	?	0	525	Calibration	-	697	6.9911	7210.98	0	?	0	525	Calibration	-	697	6.9911	7230.76	0	?	0	525	Calibration	-	697	6.992	5869.87	0	?	0	525	Calibration	-	697	6.9911	5141.57	0	?
698	7.0014	10996.1	0	?	0	525	Calibration	-	698	7.0023	20979.8	0	?	0	525	Calibration	-	698	7.0011	7220.66	0	?	0	525	Calibration	-	698	7.0011	7228.71	0	?	0	525	Calibration	-	698	7.002	5862.82	0	?	0	525	Calibration	-	698	7.0011	5125.73	0	?
699	7.0114	11065.2	0	?	0	525	Calibration	-	699	7.0123	21099.1	0	?	0	525	Calibration	-	699	7.0111	7216.8	0	?	0	525	Calibration	-	699	7.0111	7245.47	0	?	0	525	Calibration	-	699	7.012	5878.74	0	?	0	525	Calibration	-	699	7.0111	5109.61	0	?
700	7.0214	11100.3	0	?	0	525	Calibration	-	700	7.0224	21053	0	?	0	525	Calibration	-	700	7.0211	7200.06	0	?	0	525	Calibration	-	700	7.0211	7263.33	0	?	0	525	Calibration	-	700	7.022	5871.33	0	?	0	525	Calibration	-	700	7.0211	5116.92	0	?
701	7.0314	11204.1	0	?	0	525	Calibration	-	701	7.0324	20970.4	0	?	0	525	Calibration	-	701	7.0311	7206.78	0	?	0	525	Calibration	-	701	7.0311	7283.03	0	?	0	525	Calibration	-	701	7.0321	5862.03	0	?	0	525	Calibration	-	701	7.0311	5122.94	0	?
702	7.0415	11302.6	0	?	0	525	Calibration	-	702	7.0424	20906.6	0	?	0	525	Calibration	-	702	7.0411	7174	0	?	0	525	Calibration	-	702	7.0411	7273.9	0	?	0	525	Calibration	-	702	7.0421	5839.25	0	?	0	525	Calibration	-	702	7.0411	5134.7	0	?
703	7.0515	11443.1	0	?	0	525	Calibration	-	703	7.0524	20834.6	0	?	0	525	Calibration	-	703	7.0512	7198.01	0	?	0	525	Calibration	-	703	7.0512	7248.12	0	?	0	525	Calibration	-	703	7.0521	5843.92	0	?	0	525	Calibration	-	703	7.0512	5119.7	0	?
704	7.0615	11555	0	?	0	525	Calibration	-	704	7.0624	20749.5	0	?	0	525	Calibration	-	704	7.0612	7205.9	0	?	0	525	Calibration	-	704	7.0612	7249.51	0	?	0	525	Calibration	-	704	7.0621	5855.91	0	?	0	525	Calibration	-	704	7.0612	5113.44	0	?
705	7.0715	11571	0	?	0	525	Calibration	-	705	7.0724	20625.2	0	?	0	525	Calibration	-	705	7.0712	7191.06	0	?	0	525	Calibration	-	705	7.0712	7234.92	0	?	0	525	Calibration	-	705	7.0721	5851.79	0	?	0	525	Calibration	-	705	7.0712	5122.85	0	?
706	7.0815	11505	0	?	0	525	Calibration	-	706	7.0825	20633	0	?	0	525	Calibration	-	706	7.0812	7192.73	0	?	0	525	Calibration	-	706	7.0812	7221.33	0	?	0	525	Calibration	-	706	7.0821	5841.94	0	?	0	525	Calibration	-	706	7.0812	5130.65	0	?
707	7.0915	11473.8	0	?	0	525	Calibration	-	707	7.0925	20765.1	0	?	0	525	Calibration	-	707	7.0912	7204.88	0	?	0	525	Calibration	-	707	7.0912	7239.67	0	?	0	525	Calibration	-	707	7.0922	5857.37	0	?	0	525	Calibration	-	707	7.0912	5118.83	0	?
708	7.1016	11445.4	0	?	0	525	Calibration	-	708	7.1025	20552.3	0	?	0	525	Calibration	-	708	7.1012	7195.62	0	?	0	525	Calibration	-	708	7.1012	7233.21	0	?	0	525	Calibration	-	708	7.1022	5845.94	0	?	0	525	Calibration	-	708	7.1012	5118.56	0	?
709	7.1116	11279.8	0	?	0	525	Calibration	-	709	7.1125	20397	0	?	0	525	Calibration	-	709	7.1113	7192.61	0	?	0	525	Calibration	-	709	7.1113	7261.36	0	?	0	525	Calibration	-	709	7.1122	5848.63	0	?	0	525	Calibration	-	709	7.1113	5116.1	0	?
710	7.1216	11157.2	0	?	0	525	Calibration	-	710	7.1225	20604.8	0	?	0	525	Calibration	-	710	7.1213	7190.51	0	?	0	525	Calibration	-	710	7.1213	7256.93	0	?	0	525	Calibration	-	710	7.1222	5867.18	0	?	0	525	Calibration	-	710	7.1213	5127.13	0	?
711	7.1316	11067.5	0	?	0	525	Calibration	-	711	7.1325	21094.5	0	?	0	525	Calibration	-	711	7.1313	7198.77	0	?	0	525	Calibration	-	711	7.1313	7239.69	0	?	0	525	Calibration	-	711	7.1322	5866.95	0	?	0	525	Calibration	-	711	7.1313	5131.35	0	?
712	7.1416	11054.4	0	?	0	525	Calibration	-	712	7.1426	21399.9	0	?	0	525	Calibration	-	712	7.1413	7192.13	0	?	0	525	Calibration	-	712	7.1413	7237.6	0	?	0	525	Calibration	-	712	7.1422	5836.07	0	?	0	525	Calibration	-	712	7.1413	5137.49	0	?
713	7.1516	11001.2	0	?	0	525	Calibration	-	713	7.1526	21146.6	0	?	0	525	Calibration	-	713	7.1513	7190.52	0	?	0	525	Calibration	-	713	7.1513	7224.57	0	?	0	525	Calibration	-	713	7.1523	5837.68	0	?	0	525	Calibration	-	713	7.1513	5118.13	0	?
714	7.1617	10963.1	0	?	0	525	Calibration	-	714	7.1626	20846.3	0	?	0	525	Calibration	-	714	7.1613	7184.43	0	?	0	525	Calibration	-	714	7.1613	7227.02	0	?	0	525	Calibration	-	714	7.1623	5826.17	0	?	0	525	Calibration	-	714	7.1613	5123.24	0	?
715	7.1717	10916.1	0	?	0	525	Calibration	-	715	7.1726	20887.3	0	?	0	525	Calibration	-	715	7.1714	7188.51	0	?	0	525	Calibration	-	715	7.1714	7221.86	0	?	0	525	Calibration	-	715	7.1723	5849.89	0	?	0	525	Calibration	-	715	7.1714	5138.6	0	?
716	7.1817	10923.8	0	?	0	525	Calibration	-	716	7.1826	20792.1	0	?	0	525	Calibration	-	716	7.1814	7189.82	0	?	0	525	Calibration	-	716	7.1814	7217.42	0	?	0	525	Calibration	-	716	7.1823	5862.1	0	?	0	525	Calibration	-	716	7.1814	5129.59	0	?
717	7.1917	10912.9	0	?	0	525	Calibration	-	717	7.1927	20584.6	0	?	0	525	Calibration	-	717	7.1914	7177.23	0	?	0	525	Calibration	-	717	7.1914	7221.6	0	?	0	525	Calibration	-	717	7.1923	5842.71	0	?	0	525	Calibration	-	717	7.1914	5121.58	0	?
718	7.2017	10949	0	?	0	525	Calibration	-	718	7.2027	20496.7	0	?	0	525	Calibration	-	718	7.2014	7168.65	0	?	0	525	Calibration	-	718	7.2014	7238.51	0	?	0	525	Calibration	-	718	7.2024	5853.59	0	?	0	525	Calibration	-	718	7.2014	5124.44	0	?
719	7.2117	11070.1	0	?	0	525	Calibration	-	719	7.2127	20634.2	0	?	0	525	Calibration	-	719	7.2114	7182.25	0	?	0	525	Calibration	-	719	7.2114	7227.76	0	?	0	525	Calibration	-	719	7.2124	5847.82	0	?	0	525	Calibration	-	719	7.2114	5119.69	0	?
720	7.2218	11026	0	?	0	525	Calibration	-	720	7.2227	20636.5	0	?	0	525	Calibration	-	720	7.2214	7196.39	0	?	0	525	Calibration	-	720	7.2214	7226.54	0	?	0	525	Calibration	-	720	7.2224	5851.42	0	?	0	525	Calibration	-	720	7.2214	5128.15	0	?
721	7.2318	11022.7	0	?	0	525	Calibration	-	721	7.2327	20675.3	0	?	0	525	Calibration	-	721	7.2315	7183.33	0	?	0	525	Calibration	-	721	7.2315	7225.35	0	?	0	525	Calibration	-	721	7.2324	5861.18	0	?	0	525	Calibration	-	721	7.2315	5121.01	0	?
722	7.2418	11061.9	0	?	0	525	Calibration	-	722	7.2427	20612.8	0	?	0	525	Calibration	-	722	7.2415	7167.04	0	?	0	525	Calibration	-	722	7.2415	7230.26	0	?	0	525	Calibration	-	722	7.2424	5830.32	0	?	0	525	Calibration	-	722	7.2415	5123.57	0	?
723	7.2518	11079.7	0	?	0	525	Calibration	-	723	7.2528	20633.8	0	?	0	525	Calibration	-	723	7.2515	7166.01	0	?	0	525	Calibration	-	723	7.2515	7242.33	0	?	0	525	Calibration	-	723	7.2524	5840.64	0	?	0	525	Calibration	-	723	7.2515	5134.46	0	?
724	7.2618	10952.2	0	?	0	525	Calibration	-	724	7.2628	20680.5	0	?	0	525	Calibration	-	724	7.2615	7176.57	0	?	0	525	Calibration	-	724	7.2615	7255.13	0	?	0	525	Calibration	-	724	7.2625	5843.19	0	?	0	525	Calibration	-	724	7.2615	5122.39	0	?
725	7.2718	10858.3	0	?	0	525	Calibration	-	725	7.2728	20965.7	0	?	0	525	Calibration	-	725	7.2715	7167.18	0	?	0	525	Calibration	-	725	7.2715	7241.63	0	?	0	525	Calibration	-	725	7.2725	5856.48	0	?	0	525	Calibration	-	725	7.2715	5113.98	0	?
726	7.2818	10759.9	0	?	0	525	Calibration	-	726	7.2828	21196.8	0	?	0	525	Calibration	-	726	7.2815	7177.65	0	?	0	525	Calibration	-	726	7.2815	7240.2	0	?	0	525	Calibration	-	726	7.2825	5823.24	0	?	0	525	Calibration	-	726	7.2815	5115.51	0	?
727	7.2919	10694.8	0	?	0	525	Calibration	-	727	7.2928	21127.8	0	?	0	525	Calibration	-	727	7.2915	7195.5	0	?	0	525	Calibration	-	727	7.2915	7228.25	0	?	0	525	Calibration	-	727	7.2925	5851.39	0	?	0	525	Calibration	-	727	7.2915	5126.34	0	?
728	7.3019	10708.7	0	?	0	525	Calibration	-	728	7.3028	20914.3	0	?	0	525	Calibration	-	728	7.3016	7193.16	0	?	0	525	Calibration	-	728	7.3016	7225.28	0	?	0	525	Calibration	-	728	7.3025	5847.95	0	?	0	525	Calibration	-	728	7.3016	5113.57	0	?
729	7.3119	10768.5	0	?	0	525	Calibration	-	729	7.3129	20619.1	0	?	0	525	Calibration	-	729	7.3116	7186.4	0	?	0	525	Calibration	-	729	7.3116	7211.13	0	?	0	525	Calibration	-	729	7.3125	5847.16	0	?	0	525	Calibration	-	729	7.3116	5117.65	0	?
730	7.3219	10846.3	0	?	0	525	Calibration	-	730	7.3229	20603.3	0	?	0	525	Calibration	-	730	7.3216	7203.35	0	?	0	525	Calibration	-	730	7.3216	7228.12	0	?	0	525	Calibration	-	730	7.3226	5854.47	0	?	0	525	Calibration	-	730	7.3216	5102.63	0	?
731	7.3319	10935.4	0	?	0	525	Calibration	-	731	7.3329	20878	0	?	0	525	Calibration	-	731	7.3316	7210.23	0	?	0	525	Calibration	-	731	7.3316	7230.16	0	?	0	525	Calibration	-	731	7.3326	5846.07	0	?	0	525	Calibration	-	731	7.3316	5117.11	0	?
732	7.3419	10932.7	0	?	0	525	Calibration	-	732	7.3429	21294	0	?	0	525	Calibration	-	732	7.3416	7195.82	0	?	0	525	Calibration	-	732	7.3416	7243.84	0	?	0	525	Calibration	-	732	7.3426	5845.98	0	?	0	525	Calibration	-	732	7.3416	5122.64	0	?
733	7.352	11016.1	0	?	0	525	Calibration	-	733	7.3529	21342.1	0	?	0	525	Calibration	-	733	7.3516	7186.35	0	?	0	525	Calibration	-	733	7.3516	7238.07	0	?	0	525	Calibration	-	733	7.3526	5826.6	0	?	0	525	Calibration	-	733	7.3516	5132.4	0	?
734	7.362	11172.8	0	?	0	525	Calibration	-	734	7.363	21157.9	0	?	0	525	Calibration	-	734	7.3617	7185.98	0	?	0	525	Calibration	-	734	7.3617	7209.74	0	?	0	525	Calibration	-	734	7.3626	5828.94	0	?	0	525	Calibration	-	734	7.3617	5126.16	0	?
735	7.372	11251.7	0	?	0	525	Calibration	-	735	7.373	20892.2	0	?	0	525	Calibration	-	735	7.3717	7192.66	0	?	0	525	Calibration	-	735	7.3717	7222.91	0	?	0	525	Calibration	-	735	7.3726	5840.77	0	?	0	525	Calibration	-	735	7.3717	5127.59	0	?
736	7.382	11265.5	0	?	0	525	Calibration	-	736	7.383	20937.4	0	?	0	525	Calibration	-	736	7.3817	7190.47	0	?	0	525	Calibration	-	736	7.3817	7206.33	0	?	0	525	Calibration	-	736	7.3827	5830.77	0	?	0	525	Calibration	-	736	7.3817	5110.89	0	?
737	7.392	11218.8	0	?	0	525	Calibration	-	737	7.393	21052.2	0	?	0	525	Calibration	-	737	7.3917	7190.08	0	?	0	525	Calibration	-	737	7.3917	7220.27	0	?	0	525	Calibration	-	737	7.3927	5832.43	0	?	0	525	Calibration	-	737	7.3917	5137.39	0	?
738	7.402	11308.8	0	?	0	525	Calibration	-	738	7.403	20908.2	0	?	0	525	Calibration	-	738	7.4017	7193.87	0	?	0	525	Calibration	-	738	7.4017	7210.1	0	?	0	525	Calibration	-	738	7.4027	5820.71	0	?	0	525	Calibration	-	738	7.4017	5120.05	0	?
739	7.4121	11354.9	0	?	0	525	Calibration	-	739	7.413	20804.2	0	?	0	525	Calibration	-	739	7.4117	7175.09	0	?	0	525	Calibration	-	739	7.4117	7196.31	0	?	0	525	Calibration	-	739	7.4127	5819.27	0	?	0	525	Calibration	-	739	7.4117	5120.3	0	?
740	7.4221	11263.5	0	?	0	525	Calibration	-	740	7.4231	20706.4	0	?	0	525	Calibration	-	740	7.4218	7175.17	0	?	0	525	Calibration	-	740	7.4218	7184.51	0	?	0	525	Calibration	-	740	7.4227	5837.93	0	?	0	525	Calibration	-	740	7.4218	5118.63	0	?
741	7.4321	11238.8	0	?	0	525	Calibration	-	741	7.4331	20640	0	?	0	525	Calibration	-	741	7.4318	7193.13	0	?	0	525	Calibration	-	741	7.4318	7181.33	0	?	0	525	Calibration	-	741	7.4327	5835.61	0	?	0	525	Calibration	-	741	7.4318	5104.49	0	?
742	7.4421	11312	0	?	0	525	Calibration	-	742	7.4431	20764.9	0	?	0	525	Calibration	-	742	7.4418	7178.95	0	?	0	525	Calibration	-	742	7.4418	7201.63	0	?	0	525	Calibration	-	742	7.4428	5835.22	0	?	0	525	Calibration	-	742	7.4418	5119.31	0	?
743	7.4521	11381.2	0	?	0	525	Calibration	-	743	7.4531	20952.6	0	?	0	525	Calibration	-	743	7.4518	7177.24	0	?	0	525	Calibration	-	743	7.4518	7224.07	0	?	0	525	Calibration	-	743	7.4528	5824.27	0	?	0	525	Calibration	-	743	7.4518	5123.77	0	?
744	7.4621	11456.7	0	?	0	525	Calibration	-	744	7.4631	20721.5	0	?	0	525	Calibration	-	744	7.4618	7174.11	0	?	0	525	Calibration	-	744	7.4618	7212.46	0	?	0	525	Calibration	-	744	7.4628	5842.92	0	?	0	525	Calibration	-	744	7.4618	5129.84	0	?
745	7.4722	11402.6	0	?	0	525	Calibration	-	745	7.4731	20499.2	0	?	0	525	Calibration	-	745	7.4718	7192.44	0	?	0	525	Calibration	-	745	7.4718	7195.13	0	?	0	525	Calibration	-	745	7.4728	5839.97	0	?	0	525	Calibration	-	745	7.4718	5135.58	0	?
746	7.4822	11338.4	0	?	0	525	Calibration	-	746	7.4832	20331	0	?	0	525	Calibration	-	746	7.4818	7195.34	0	?	0	525	Calibration	-	746	7.4818	7204.02	0	?	0	525	Calibration	-	746	7.4828	5823.89	0	?	0	525	Calibration	-	746	7.4818	5127.5	0	?
747	7.4922	11323.5	0	?	0	525	Calibration	-	747	7.4932	20309.9	0	?	0	525	Calibration	-	747	7.4919	7190.25	0	?	0	525	Calibration	-	747	7.4919	7199.46	0	?	0	525	Calibration	-	747	7.4929	5822.38	0	?	0	525	Calibration	-	747	7.4919	5121.81	0	?
748	7.5022	11345.3	0	?	0	525	Calibration	-	748	7.5032	20495.9	0	?	0	525	Calibration	-	748	7.5019	7179.5	0	?	0	525	Calibration	-	748	7.5019	7215.74	0	?	0	525	Calibration	-	748	7.5029	5834.53	0	?	0	525	Calibration	-	748	7.5019	5126.05	0	?
749	7.5122	11476.6	0	?	0	525	Calibration	-	749	7.5132	20741.1	0	?	0	525	Calibration	-	749	7.5119	7178.01	0	?	0	525	Calibration	-	749	7.5119	7216.88	0	?	0	525	Calibration	-	749	7.5129	5842.76	0	?	0	525	Calibration	-	749	7.5119	5126.86	0	?
750	7.5222	11570.2	0	?	0	525	Calibration	-	750	7.5232	21027.9	0	?	0	525	Calibration	-	750	7.5219	7184.19	0	?	0	525	Calibration	-	750	7.5219	7226.51	0	?	0	525	Calibration	-	750	7.5229	5827.19	0	?	0	525	Calibration	-	750	7.5219	5140.79	0	?
751	7.5323	11560.5	0	?	0	525	Calibration	-	751	7.5333	21106.6	0	?	0	525	Calibration	-	751	7.5319	7192.92	0	?	0	525	Calibration	-	751	7.5319	7220.21	0	?	0	525	Calibration	-	751	7.5329	5820.34	0	?	0	525	Calibration	-	751	7.5319	5120.01	0	?
752	7.5423	11412	0	?	0	525	Calibration	-	752	7.5433	21011.3	0	?	0	525	Calibration	-	752	7.5419	7183.89	0	?	0	525	Calibration	-	752	7.5419	7240.91	0	?	0	525	Calibration	-	752	7.5429	5838.14	0	?	0	525	Calibration	-	752	7.5419	5133.2	0	?
753	7.5523	11374.4	0	?	0	525	Calibration	-	753	7.5533	20949.8	0	?	0	525	Calibration	-	753	7.552	7163.77	0	?	0	525	Calibration	-	753	7.552	7253.14	0	?	0	525	Calibration	-	753	7.553	5828.44	0	?	0	525	Calibration	-	753	7.552	5125.04	0	?
754	7.5623	11283.7	0	?	0	525	Calibration	-	754	7.5633	20904.7	0	?	0	525	Calibration	-	754	7.562	7183.14	0	?	0	525	Calibration	-	754	7.562	7250.81	0	?	0	525	Calibration	-	754	7.563	5816.97	0	?	0	525	Calibration	-	754	7.562	5126.14	0	?
755	7.5723	11161.9	0	?	0	525	Calibration	-	755	7.5733	20874.5	0	?	0	525	Calibration	-	755	7.572	7177.62	0	?	0	525	Calibration	-	755	7.572	7211.56	0	?	0	525	Calibration	-	755	7.573	5824.89	0	?	0	525	Calibration	-	755	7.572	5125.83	0	?
756	7.5823	11153	0	?	0	525	Calibration	-	756	7.5833	20816.8	0	?	0	525	Calibration	-	756	7.582	7188.41	0	?	0	525	Calibration	-	756	7.582	7185.1	0	?	0	525	Calibration	-	756	7.583	5826.24	0	?	0	525	Calibration	-	756	7.582	5129.93	0	?
757	7.5924	11131.7	0	?	0	525	Calibration	-	757	7.5934	20747.7	0	?	0	525	Calibration	-	757	7.592	7183.41	0	?	0	525	Calibration	-	757	7.592	7205.1	0	?	0	525	Calibration	-	757	7.593	5825.72	0	?	0	525	Calibration	-	757	7.592	5127.07	0	?
758	7.6024	10968.9	0	?	0	525	Calibration	-	758	7.6034	20692.1	0	?	0	525	Calibration	-	758	7.602	7175.98	0	?	0	525	Calibration	-	758	7.602	7221.83	0	?	0	525	Calibration	-	758	7.603	5832.06	0	?	0	525	Calibration	-	758	7.602	5111.19	0	?
759	7.6124	10869.4	0	?	0	525	Calibration	-	759	7.6134	20636.2	0	?	0	525	Calibration	-	759	7.6121	7175.25	0	?	0	525	Calibration	-	759	7.6121	7228.76	0	?	0	525	Calibration	-	759	7.6131	5824.16	0	?	0	525	Calibration	-	759	7.6121	5120.97	0	?
760	7.6224	10901	0	?	0	525	Calibration	-	760	7.6234	20662.8	0	?	0	525	Calibration	-	760	7.6221	7174.39	0	?	0	525	Calibration	-	760	7.6221	7215.51	0	?	0	525	Calibration	-	760	7.6231	5810.34	0	?	0	525	Calibration	-	760	7.6221	5103.92	0	?
761	7.6324	10888.3	0	?	0	525	Calibration	-	761	7.6334	20754.5	0	?	0	525	Calibration	-	761	7.6321	7183	0	?	0	525	Calibration	-	761	7.6321	7219.62	0	?	0	525	Calibration	-	761	7.6331	5793.01	0	?	0	525	Calibration	-	761	7.6321	5116.89	0	?
762	7.6424	10851.6	0	?	0	525	Calibration	-	762	7.6434	20660.8	0	?	0	525	Calibration	-	762	7.6421	7180.19	0	?	0	525	Calibration	-	762	7.6421	7223.1	0	?	0	525	Calibration	-	762	7.6431	5815.58	0	?	0	525	Calibration	-	762	7.6421	5121.11	0	?
763	7.6525	10855.2	0	?	0	525	Calibration	-	763	7.6535	20621.7	0	?	0	525	Calibration	-	763	7.6521	7172.98	0	?	0	525	Calibration	-	763	7.6521	7232.29	0	?	0	525	Calibration	-	763	7.6531	5817.84	0	?	0	525	Calibration	-	763	7.6521	5118.5	0	?
764	7.6625	10879.4	0	?	0	525	Calibration	-	764	7.6635	20758.3	0	?	0	525	Calibration	-	764	7.6621	7181.85	0	?	0	525	Calibration	-	764	7.6621	7215.55	0	?	0	525	Calibration	-	764	7.6631	5811.96	0	?	0	525	Calibration	-	764	7.6621	5126.15	0	?
765	7.6725	10916.2	0	?	0	525	Calibration	-	765	7.6735	20863	0	?	0	525	Calibration	-	765	7.6721	7177.48	0	?	0	525	Calibration	-	765	7.6721	7216.37	0	?	0	525	Calibration	-	765	7.6732	5822.26	0	?	0	525	Calibration	-	765	7.6721	5122.09	0	?
766	7.6825	10896.5	0	?	0	525	Calibration	-	766	7.6835	20887	0	?	0	525	Calibration	-	766	7.6822	7169.02	0	?	0	525	Calibration	-	766	7.6822	7188.27	0	?	0	525	Calibration	-	766	7.6832	5818.23	0	?	0	525	Calibration	-	766	7.6822	5115.62	0	?
767	7.6925	10876.1	0	?	0	525	Calibration	-	767	7.6935	20853	0	?	0	525	Calibration	-	767	7.6922	7171.13	0	?	0	525	Calibration	-	767	7.6922	7165.45	0	?	0	525	Calibration	-	767	7.6932	5834.41	0	?	0	525	Calibration	-	767	7.6922	5106.96	0	?
768	7.7025	10817.5	0	?	0	525	Calibration	-	768	7.7036	20926.2	0	?	0	525	Calibration	-	768	7.7022	7167.89	0	?	0	525	Calibration	-	768	7.7022	7184.24	0	?	0	525	Calibration	-	768	7.7032	5832.84	0	?	0	525	Calibration	-	768	7.7022	5117.09	0	?
769	7.7126	10759.1	0	?	0	525	Calibration	-	769	7.7136	21026.8	0	?	0	525	Calibration	-	769	7.7122	7167.93	0	?	0	525	Calibration	-	769	7.7122	7191.27	0	?	0	525	Calibration	-	769	7.7132	5827.31	0	?	0	525	Calibration	-	769	7.7122	5119.91	0	?
770	7.7226	10802.3	0	?	0	525	Calibration	-	770	7.7236	21074.3	0	?	0	525	Calibration	-	770	7.7222	7177.86	0	?	0	525	Calibration	-	770	7.7222	7166.15	0	?	0	525	Calibration	-	770	7.7232	5827.11	0	?	0	525	Calibration	-	770	7.7222	5096.82	0	?
771	7.7326	10921.2	0	?	0	525	Calibration	-	771	7.7336	20958.1	0	?	0	525	Calibration	-	771	7.7322	7165.93	0	?	0	525	Calibration	-	771	7.7322	7181.68	0	?	0	525	Calibration	-	771	7.7333	5832.07	0	?	0	525	Calibration	-	771	7.7322	5098.16	0	?
772	7.7426	10942.7	0	?	0	525	Calibration	-	772	7.7436	20696.5	0	?	0	525	Calibration	-	772	7.7423	7172.4	0	?	0	525	Calibration	-	772	7.7423	7192.93	0	?	0	525	Calibration	-	772	7.7433	5837.45	0	?	0	525	Calibration	-	772	7.7423	5110.37	0	?
773	7.7526	10875.6	0	?	0	525	Calibration	-	773	7.7536	20482.9	0	?	0	525	Calibration	-	773	7.7523	7167.35	0	?	0	525	Calibration	-	773	7.7523	7173.1	0	?	0	525	Calibration	-	773	7.7533	5842.16	0	?	0	525	Calibration	-	773	7.7523	5116.44	0	?
774	7.7626	10852.1	0	?	0	525	Calibration	-	774	7.7637	20407	0	?	0	525	Calibration	-	774	7.7623	7175.74	0	?	0	525	Calibration	-	774	7.7623	7183.01	0	?	0	525	Calibration	-	774	7.7633	5828.33	0	?	0	525	Calibration	-	774	7.7623	5106.43	0	?
775	7.7726	10890.9	0	?	0	525	Calibration	-	775	7.7737	20547.5	0	?	0	525	Calibration	-	775	7.7723	7185.12	0	?	0	525	Calibration	-	775	7.7723	7184.37	0	?	0	525	Calibration	-	775	7.7733	5846.11	0	?	0	525	Calibration	-	775	7.7723	5113.89	0	?
776	7.7827	10922.7	0	?	0	525	Calibration	-	776	7.7837	20624.4	0	?	0	525	Calibration	-	776	7.7823	7177.21	0	?	0	525	Calibration	-	776	7.7823	7202.62	0	?	0	525	Calibration	-	776	7.7833	5822.16	0	?	0	525	Calibration	-	776	7.7823	5111.49	0	?
777	7.7927	10933.9	0	?	0	525	Calibration	-	777	7.7937	20644.7	0	?	0	525	Calibration	-	777	7.7923	7186.79	0	?	0	525	Calibration	-	777	7.7923	7191.78	0	?	0	525	Calibration	-	777	7.7934	5825.09	0	?	0	525	Calibration	-	777	7.7923	5108.18	0	?
778	7.8027	10897.4	0	?	0	525	Calibration	-	778	7.8037	20739.7	0	?	0	525	Calibration	-	778	7.8024	7182.09	0	?	0	525	Calibration	-	778	7.8024	7185.55	0	?	0	525	Calibration	-	778	7.8034	5831.08	0	?	0	525	Calibration	-	778	7.8024	5115.24	0	?
779	7.8127	10947.2	0	?	0	525	Calibration	-	779	7.8137	20829.9	0	?	0	525	Calibration	-	779	7.8124	7174.13	0	?	0	525	Calibration	-	779	7.8124	7200.18	0	?	0	525	Calibration	-	779	7.8134	5822.01	0	?	0	525	Calibration	-	779	7.8124	5104.46	0	?
780	7.8227	11047.6	0	?	0	525	Calibration	-	780	7.8238	20796.8	0	?	0	525	Calibration	-	780	7.8224	7179.48	0	?	0	525	Calibration	-	780	7.8224	7180.06	0	?	0	525	Calibration	-	780	7.8234	5813.33	0	?	0	525	Calibration	-	780	7.8224	5111.74	0	?
781	7.8327	11112.7	0	?	0	525	Calibration	-	781	7.8338	20719.7	0	?	0	525	Calibration	-	781	7.8324	7163.13	0	?	0	525	Calibration	-	781	7.8324	7203.78	0	?	0	525	Calibration	-	781	7.8334	5814.56	0	?	0	525	Calibration	-	781	7.8324	5114.96	0	?
782	7.8428	11113.9	0	?	0	525	Calibration	-	782	7.8438	20586.8	0	?	0	525	Calibration	-	782	7.8424	7166.77	0	?	0	525	Calibration	-	782	7.8424	7182.8	0	?	0	525	Calibration	-	782	7.8435	5822.41	0	?	0	525	Calibration	-	782	7.8424	5115.67	0	?
783	7.8528	11110.8	0	?	0	525	Calibration	-	783	7.8538	20468.3	0	?	0	525	Calibration	-	783	7.8524	7166.22	0	?	0	525	Calibration	-	783	7.8524	7197.66	0	?	0	525	Calibration	-	783	7.8535	5799.35	0	?	0	525	Calibration	-	783	7.8524	5131.1	0	?
784	7.8628	11255.1	0	?	0	525	Calibration	-	784	7.8638	20376.7	0	?	0	525	Calibration	-	784	7.8624	7155.74	0	?	0	525	Calibration	-	784	7.8624	7205.19	0	?	0	525	Calibration	-	784	7.8635	5825.05	0	?	0	525	Calibration	-	784	7.8624	5119.97	0	?
785	7.8728	11434	0	?	0	525	Calibration	-	785	7.8739	20469.8	0	?	0	525	Calibration	-	785	7.8725	7161.13	0	?	0	525	Calibration	-	785	7.8725	7182.73	0	?	0	525	Calibration	-	785	7.8735	5831.31	0	?	0	525	Calibration	-	785	7.8725	5107.78	0	?
786	7.8828	11485.6	0	?	0	525	Calibration	-	786	7.8839	20404.2	0	?	0	525	Calibration	-	786	7.8825	7174.1	0	?	0	525	Calibration	-	786	7.8825	7161.93	0	?	0	525	Calibration	-	786	7.8835	5835.15	0	?	0	525	Calibration	-	786	7.8825	5112.79	0	?
787	7.8928	11539.9	0	?	0	525	Calibration	-	787	7.8939	20410	0	?	0	525	Calibration	-	787	7.8925	7169.56	0	?	0	525	Calibration	-	787	7.8925	7163.07	0	?	0	525	Calibration	-	787	7.8935	5832.82	0	?	0	525	Calibration	-	787	7.8925	5104.65	0	?
788	7.9029	11495.6	0	?	0	525	Calibration	-	788	7.9039	20533	0	?	0	525	Calibration	-	788	7.9025	7177.19	0	?	0	525	Calibration	-	788	7.9025	7176.07	0	?	0	525	Calibration	-	788	7.9036	5809.32	0	?	0	525	Calibration	-	788	7.9025	5109.48	0	?
789	7.9129	11494.9	0	?	0	525	Calibration	-	789	7.9139	20531.1	0	?	0	525	Calibration	-	789	7.9125	7162.26	0	?	0	525	Calibration	-	789	7.9125	7176.92	0	?	0	525	Calibration	-	789	7.9136	5789.53	0	?	0	525	Calibration	-	789	7.9125	5111.82	0	?
790	7.9229	11502.6	0	?	0	525	Calibration	-	790	7.9239	20672.7	0	?	0	525	Calibration	-	790	7.9225	7180.88	0	?	0	525	Calibration	-	790	7.9225	7157.34	0	?	0	525	Calibration	-	790	7.9236	5786.32	0	?	0	525	Calibration	-	790	7.9225	5107.58	0	?
791	7.9329	11446.7	0	?	0	525	Calibration	-	791	7.934	20826.9	0	?	0	525	Calibration	-	791	7.9326	7185.82	0	?	0	525	Calibration	-	791	7.9326	7146.58	0	?	0	525	Calibration	-	791	7.9336	5812.21	0	?	0	525	Calibration	-	791	7.9326	5104.61	0	?
792	7.9429	11333.7	0	?	0	525	Calibration	-	792	7.944	20659.4	0	?	0	525	Calibration	-	792	7.9426	7158.52	0	?	0	525	Calibration	-	792	7.9426	7155.48	0	?	0	525	Calibration	-	792	7.9436	5804.61	0	?	0	525	Calibration	-	792	7.9426	5099.24	0	?
793	7.9529	11279.4	0	?	0	525	Calibration	-	793	7.954	20517.5	0	?	0	525	Calibration	-	793	7.9526	7176.18	0	?	0	525	Calibration	-	793	7.9526	7157.56	0	?	0	525	Calibration	-	793	7.9536	5809.14	0	?	0	525	Calibration	-	793	7.9526	5092.89	0	?
794	7.963	11311.9	0	?	0	525	Calibration	-	794	7.964	20460.8	0	?	0	525	Calibration	-	794	7.9626	7173.79	0	?	0	525	Calibration	-	794	7.9626	7188.18	0	?	0	525	Calibration	-	794	7.9637	5800.85	0	?	0	525	Calibration	-	794	7.9626	5110.12	0	?
795	7.973	11268	0	?	0	525	Calibration	-	795	7.974	20466.9	0	?	0	525	Calibration	-	795	7.9726	7178.11	0	?	0	525	Calibration	-	795	7.9726	7175.05	0	?	0	525	Calibration	-	795	7.9737	5803.81	0	?	0	525	Calibration	-	795	7.9726	5103.59	0	?
796	7.983	11292.2	0	?	0	525	Calibration	-	796	7.984	20478.2	0	?	0	525	Calibration	-	796	7.9826	7158.19	0	?	0	525	Calibration	-	796	7.9826	7182.72	0	?	0	525	Calibration	-	796	7.9837	5801.17	0	?	0	525	Calibration	-	796	7.9826	5101.41	0	?
797	7.993	11266.6	0	?	0	525	Calibration	-	797	7.9941	20652.9	0	?	0	525	Calibration	-	797	7.9927	7164.19	0	?	0	525	Calibration	-	797	7.9927	7173.35	0	?	0	525	Calibration	-	797	7.9937	5797.54	0	?	0	525	Calibration	-	797	7.9927	5112.25	0	?
798	8.003	11229.5	0	?	0	525	Calibration	-	798	8.0041	20790.6	0	?	0	525	Calibration	-	798	8.0027	7170.6	0	?	0	525	Calibration	-	798	8.0027	7164.42	0	?	0	525	Calibration	-	798	8.0037	5812.97	0	?	0	525	Calibration	-	798	8.0027	5113.81	0	?
799	8.013	11205.5	0	?	0	525	Calibration	-	799	8.0141	20765	0	?	0	525	Calibration	-	799	8.0127	7157.64	0	?	0	525	Calibration	-	799	8.0127	7189.08	0	?	0	525	Calibration	-	799	8.0137	5811.35	0	?	0	525	Calibration	-	799	8.0127	5104.16	0	?
800	8.0231	11198.1	0	?	0	525	Calibration	-	800	8.0241	20546.1	0	?	0	525	Calibration	-	800	8.0227	7162.48	0	?	0	525	Calibration	-	800	8.0227	7170.93	0	?	0	525	Calibration	-	800	8.0238	5790.62	0	?	0	525	Calibration	-	800	8.0227	5110.81	0	?
801	8.0331	11229.9	0	?	0	525	Calibration	-	801	8.0341	20513.4	0	?	0	525	Calibration	-	801	8.0327	7159.04	0	?	0	525	Calibration	-	801	8.0327	7173	0	?	0	525	Calibration	-	801	8.0338	5805.01	0	?	0	525	Calibration	-	801	8.0327	5101.72	0	?
802	8.0431	11145.5	0	?	0	525	Calibration	-	802	8.0441	20554.2	0	?	0	525	Calibration	-	802	8.0427	7164.42	0	?	0	525	Calibration	-	802	8.0427	7156.82	0	?	0	525	Calibration	-	802	8.0438	5819.81	0	?	0	525	Calibration	-	802	8.0427	5104.8	0	?
803	8.0531	11157.5	0	?	0	525	Calibration	-	803	8.0542	20741.5	0	?	0	525	Calibration	-	803	8.0528	7164.52	0	?	0	525	Calibration	-	803	8.0528	7171.08	0	?	0	525	Calibration	-	803	8.0538	5805.82	0	?	0	525	Calibration	-	803	8.0528	5106.59	0	?
804	8.0631	11115.7	0	?	0	525	Calibration	-	804	8.0642	20852.4	0	?	0	525	Calibration	-	804	8.0628	7158.15	0	?	0	525	Calibration	-	804	8.0628	7185.03	0	?	0	525	Calibration	-	804	8.0638	5812.85	0	?	0	525	Calibration	-	804	8.0628	5113.03	0	?
805	8.0731	11106.3	0	?	0	525	Calibration	-	805	8.0742	20934.2	0	?	0	525	Calibration	-	805	8.0728	7156.04	0	?	0	525	Calibration	-	805	8.0728	7192.35	0	?	0	525	Calibration	-	805	8.0738	5828.64	0	?	0	525	Calibration	-	805	8.0728	5119.81	0	?
806	8.0832	11110.3	0	?	0	525	Calibration	-	806	8.0842	20899.3	0	?	0	525	Calibration	-	806	8.0828	7164.06	0	?	0	525	Calibration	-	806	8.0828	7174.3	0	?	0	525	Calibration	-	806	8.0839	5837.82	0	?	0	525	Calibration	-	806	8.0828	5095.52	0	?
807	8.0932	10997.5	0	?	0	525	Calibration	-	807	8.0942	20824.7	0	?	0	525	Calibration	-	807	8.0928	7157.88	0	?	0	525	Calibration	-	807	8.0928	7183.54	0	?	0	525	Calibration	-	807	8.0939	5796.75	0	?	0	525	Calibration	-	807	8.0928	5090.81	0	?
808	8.1032	10903.9	0	?	0	525	Calibration	-	808	8.1043	20656.4	0	?	0	525	Calibration	-	808	8.1028	7158.86	0	?	0	525	Calibration	-	808	8.1028	7174.71	0	?	0	525	Calibration	-	808	8.1039	5802.41	0	?	0	525	Calibration	-	808	8.1028	5112.54	0	?
809	8.1132	10826.4	0	?	0	525	Calibration	-	809	8.1143	20581	0	?	0	525	Calibration	-	809	8.1128	7154.85	0	?	0	525	Calibration	-	809	8.1128	7174.64	0	?	0	525	Calibration	-	809	8.1139	5805.41	0	?	0	525	Calibration	-	809	8.1128	5114.62	0	?
810	8.1232	10782.7	0	?	0	525	Calibration	-	810	8.1243	20526	0	?	0	525	Calibration	-	810	8.1229	7163.95	0	?	0	525	Calibration	-	810	8.1229	7156.3	0	?	0	525	Calibration	-	810	8.1239	5808.35	0	?	0	525	Calibration	-	810	8.1229	5122.84	0	?
811	8.1332	10815.2	0	?	0	525	Calibration	-	811	8.1343	20472.6	0	?	0	525	Calibration	-	811	8.1329	7142.82	0	?	0	525	Calibration	-	811	8.1329	7169.5	0	?	0	525	Calibration	-	811	8.134	5812.32	0	?	0	525	Calibration	-	811	8.1329	5109.66	0	?
812	8.1433	10831.8	0	?	0	525	Calibration	-	812	8.1443	20351.5	0	?	0	525	Calibration	-	812	8.1429	7159.46	0	?	0	525	Calibration	-	812	8.1429	7183.57	0	?	0	525	Calibration	-	812	8.144	5822	0	?	0	525	Calibration	-	812	8.1429	5112.96	0	?
813	8.1533	10853.4	0	?	0	525	Calibration	-	813	8.1543	20276.8	0	?	0	525	Calibration	-	813	8.1529	7154.18	0	?	0	525	Calibration	-	813	8.1529	7176.95	0	?	0	525	Calibration	-	813	8.154	5813.74	0	?	0	525	Calibration	-	813	8.1529	5098.28	0	?
814	8.1633	10834.4	0	?	0	525	Calibration	-	814	8.1644	20297.6	0	?	0	525	Calibration	-	814	8.1629	7160.31	0	?	0	525	Calibration	-	814	8.1629	7165.97	0	?	0	525	Calibration	-	814	8.164	5817.84	0	?	0	525	Calibration	-	814	8.1629	5098.93	0	?
815	8.1733	10836.6	0	?	0	525	Calibration	-	815	8.1744	20420.8	0	?	0	525	Calibration	-	815	8.1729	7178.26	0	?	0	525	Calibration	-	815	8.1729	7167.3	0	?	0	525	Calibration	-	815	8.174	5805.7	0	?	0	525	Calibration	-	815	8.1729	5113.98	0	?
816	8.1833	10828.2	0	?	0	525	Calibration	-	816	8.1844	20441.4	0	?	0	525	Calibration	-	816	8.183	7177.02	0	?	0	525	Calibration	-	816	8.183	7146.32	0	?	0	525	Calibration	-	816	8.184	5804.15	0	?	0	525	Calibration	-	816	8.183	5105.77	0	?
817	8.1933	10781.4	0	?	0	525	Calibration	-	817	8.1944	20478.6	0	?	0	525	Calibration	-	817	8.193	7140.06	0	?	0	525	Calibration	-	817	8.193	7156.66	0	?	0	525	Calibration	-	817	8.1941	5808.18	0	?	0	525	Calibration	-	817	8.193	5100.56	0	?
818	8.2033	10787.8	0	?	0	525	Calibration	-	818	8.2044	20427	0	?	0	525	Calibration	-	818	8.203	7148.12	0	?	0	525	Calibration	-	818	8.203	7166.44	0	?	0	525	Calibration	-	818	8.2041	5797.51	0	?	0	525	Calibration	-	818	8.203	5102.47	0	?
819	8.2134	10782.7	0	?	0	525	Calibration	-	819	8.2144	20440.6	0	?	0	525	Calibration	-	819	8.213	7137.42	0	?	0	525	Calibration	-	819	8.213	7187.92	0	?	0	525	Calibration	-	819	8.2141	5803.39	0	?	0	525	Calibration	-	819	8.213	5117.67	0	?
820	8.2234	10820.6	0	?	0	525	Calibration	-	820	8.2245	20467.9	0	?	0	525	Calibration	-	820	8.223	7154.58	0	?	0	525	Calibration	-	820	8.223	7184.25	0	?	0	525	Calibration	-	820	8.2241	5790.2	0	?	0	525	Calibration	-	820	8.223	5112.58	0	?
821	8.2334	10926.8	0	?	0	525	Calibration	-	821	8.2345	20484.6	0	?	0	525	Calibration	-	821	8.233	7140.38	0	?	0	525	Calibration	-	821	8.233	7174.19	0	?	0	525	Calibration	-	821	8.2341	5800.6	0	?	0	525	Calibration	-	821	8.233	5105.44	0	?
822	8.2434	10922.4	0	?	0	525	Calibration	-	822	8.2445	20358	0	?	0	525	Calibration	-	822	8.2431	7159.23	0	?	0	525	Calibration	-	822	8.2431	7166.1	0	?	0	525	Calibration	-	822	8.2441	5790.41	0	?	0	525	Calibration	-	822	8.2431	5123.54	0	?
823	8.2534	10889.5	0	?	0	525	Calibration	-	823	8.2545	20481.8	0	?	0	525	Calibration	-	823	8.2531	7160.73	0	?	0	525	Calibration	-	823	8.2531	7151.38	0	?	0	525	Calibration	-	823	8.2542	5798.52	0	?	0	525	Calibration	-	823	8.2531	5084.19	0	?
824	8.2634	10935.7	0	?	0	525	Calibration	-	824	8.2645	20461.3	0	?	0	525	Calibration	-	824	8.2631	7150.02	0	?	0	525	Calibration	-	824	8.2631	7146.28	0	?	0	525	Calibration	-	824	8.2642	5792.1	0	?	0	525	Calibration	-	824	8.2631	5093.77	0	?
825	8.2735	11000.8	0	?	0	525	Calibration	-	825	8.2746	20361.6	0	?	0	525	Calibration	-	825	8.2731	7159.76	0	?	0	525	Calibration	-	825	8.2731	7160.24	0	?	0	525	Calibration	-	825	8.2742	5785.52	0	?	0	525	Calibration	-	825	8.2731	5098.43	0	?
826	8.2835	10990.7	0	?	0	525	Calibration	-	826	8.2846	20367.3	0	?	0	525	Calibration	-	826	8.2831	7153.7	0	?	0	525	Calibration	-	826	8.2831	7172.53	0	?	0	525	Calibration	-	826	8.2842	5795.36	0	?	0	525	Calibration	-	826	8.2831	5086.79	0	?
827	8.2935	11011.1	0	?	0	525	Calibration	-	827	8.2946	20314.8	0	?	0	525	Calibration	-	827	8.2931	7151.98	0	?	0	525	Calibration	-	827	8.2931	7181.74	0	?	0	525	Calibration	-	827	8.2942	5805.97	0	?	0	525	Calibration	-	827	8.2931	5100.71	0	?
828	8.3035	10964.4	0	?	0	525	Calibration	-	828	8.3046	20425.2	0	?	0	525	Calibration	-	828	8.3031	7154.83	0	?	0	525	Calibration	-	828	8.3031	7200.31	0	?	0	525	Calibration	-	828	8.3042	5799.39	0	?	0	525	Calibration	-	828	8.3031	5101.34	0	?
829	8.3135	10936.3	0	?	0	525	Calibration	-	829	8.3146	20538.3	0	?	0	525	Calibration	-	829	8.3132	7156.08	0	?	0	525	Calibration	-	829	8.3132	7204.96	0	?	0	525	Calibration	-	829	8.3143	5800.33	0	?	0	525	Calibration	-	829	8.3132	5107.03	0	?
830	8.3235	10891.8	0	?	0	525	Calibration	-	830	8.3246	20562.2	0	?	0	525	Calibration	-	830	8.3232	7158.18	0	?	0	525	Calibration	-	830	8.3232	7208.04	0	?	0	525	Calibration	-	830	8.3243	5796.7	0	?	0	525	Calibration	-	830	8.3232	5089.23	0	?
831	8.3336	10875.8	0	?	0	525	Calibration	-	831	8.3347	20491.9	0	?	0	525	Calibration	-	831	8.3332	7153.32	0	?	0	525	Calibration	-	831	8.3332	7223.46	0	?	0	525	Calibration	-	831	8.3343	5791.79	0	?	0	525	Calibration	-	831	8.3332	5104.55	0	?
832	8.3436	10909.2	0	?	0	525	Calibration	-	832	8.3447	20435.5	0	?	0	525	Calibration	-	832	8.3432	7148.92	0	?	0	525	Calibration	-	832	8.3432	7215.7	0	?	0	525	Calibration	-	832	8.3443	5793.18	0	?	0	525	Calibration	-	832	8.3432	5105.84	0	?
833	8.3536	11006.8	0	?	0	525	Calibration	-	833	8.3547	20403.5	0	?	0	525	Calibration	-	833	8.3532	7141.5	0	?	0	525	Calibration	-	833	8.3532	7197.94	0	?	0	525	Calibration	-	833	8.3543	5797.22	0	?	0	525	Calibration	-	833	8.3532	5097.81	0	?
834	8.3636	11050.7	0	?	0	525	Calibration	-	834	8.3647	20434	0	?	0	525	Calibration	-	834	8.3632	7143	0	?	0	525	Calibration	-	834	8.3632	7188.43	0	?	0	525	Calibration	-	834	8.3643	5782.76	0	?	0	525	Calibration	-	834	8.3632	5091.1	0	?
835	8.3736	10907.2	0	?	0	525	Calibration	-	835	8.3747	20480.3	0	?	0	525	Calibration	-	835	8.3733	7145.3	0	?	0	525	Calibration	-	835	8.3733	7188.4	0	?	0	525	Calibration	-	835	8.3744	5797.14	0	?	0	525	Calibration	-	835	8.3733	5093.75	0	?
836	8.3836	10821.9	0	?	0	525	Calibration	-	836	8.3847	20476.7	0	?	0	525	Calibration	-	836	8.3833	7150.68	0	?	0	525	Calibration	-	836	8.3833	7176.6	0	?	0	525	Calibration	-	836	8.3844	5802.72	0	?	0	525	Calibration	-	836	8.3833	5098.87	0	?
837	8.3937	10767.4	0	?	0	525	Calibration	-	837	8.3948	20426.7	0	?	0	525	Calibration	-	837	8.3933	7142.48	0	?	0	525	Calibration	-	837	8.3933	7170.05	0	?	0	525	Calibration	-	837	8.3944	5793.59	0	?	0	525	Calibration	-	837	8.3933	5106.27	0	?
838	8.4037	10761.5	0	?	0	525	Calibration	-	838	8.4048	20291	0	?	0	525	Calibration	-	838	8.4033	7149.87	0	?	0	525	Calibration	-	838	8.4033	7162.35	0	?	0	525	Calibration	-	838	8.4044	5796.71	0	?	0	525	Calibration	-	838	8.4033	5093.44	0	?
839	8.4137	10749.5	0	?	0	525	Calibration	-	839	8.4148	20318.2	0	?	0	525	Calibration	-	839	8.4133	7153.36	0	?	0	525	Calibration	-	839	8.4133	7147.89	0	?	0	525	Calibration	-	839	8.4144	5798.85	0	?	0	525	Calibration	-	839	8.4133	5080.19	0	?
840	8.4237	10878.1	0	?	0	525	Calibration	-	840	8.4248	20311.9	0	?	0	525	Calibration	-	840	8.4233	7164.01	0	?	0	525	Calibration	-	840	8.4233	7165.51	0	?	0	525	Calibration	-	840	8.4244	5806	0	?	0	525	Calibration	-	840	8.4233	5090.48	0	?
841	8.4337	11038.8	0	?	0	525	Calibration	-	841	8.4348	20408.5	0	?	0	525	Calibration	-	841	8.4334	7157.83	0	?	0	525	Calibration	-	841	8.4334	7150.05	0	?	0	525	Calibration	-	841	8.4345	5789.33	0	?	0	525	Calibration	-	841	8.4334	5076.36	0	?
842	8.4437	11072.3	0	?	0	525	Calibration	-	842	8.4449	20467.9	0	?	0	525	Calibration	-	842	8.4434	7143.65	0	?	0	525	Calibration	-	842	8.4434	7152.73	0	?	0	525	Calibration	-	842	8.4445	5821.09	0	?	0	525	Calibration	-	842	8.4434	5097.95	0	?
843	8.4538	11093.1	0	?	0	525	Calibration	-	843	8.4549	20440.9	0	?	0	525	Calibration	-	843	8.4534	7134.42	0	?	0	525	Calibration	-	843	8.4534	7151.2	0	?	0	525	Calibration	-	843	8.4545	5796.36	0	?	0	525	Calibration	-	843	8.4534	5108.1	0	?
844	8.4638	11066.4	0	?	0	525	Calibration	-	844	8.4649	20443.4	0	?	0	525	Calibration	-	844	8.4634	7119.39	0	?	0	525	Calibration	-	844	8.4634	7181.22	0	?	0	525	Calibration	-	844	8.4645	5777.15	0	?	0	525	Calibration	-	844	8.4634	5105.41	0	?
845	8.4738	11132.7	0	?	0	525	Calibration	-	845	8.4749	20361.3	0	?	0	525	Calibration	-	845	8.4734	7131.17	0	?	0	525	Calibration	-	845	8.4734	7160.78	0	?	0	525	Calibration	-	845	8.4745	5786.73	0	?	0	525	Calibration	-	845	8.4734	5093.06	0	?
846	8.4838	11190.8	0	?	0	525	Calibration	-	846	8.4849	20285.7	0	?	0	525	Calibration	-	846	8.4834	7124.74	0	?	0	525	Calibration	-	846	8.4834	7156.45	0	?	0	525	Calibration	-	846	8.4846	5783.36	0	?	0	525	Calibration	-	846	8.4834	5087.41	0	?
847	8.4938	11397.7	0	?	0	525	Calibration	-	847	8.4949	20346.8	0	?	0	525	Calibration	-	847	8.4934	7132.32	0	?	0	525	Calibration	-	847	8.4934	7164.84	0	?	0	525	Calibration	-	847	8.4946	5810.61	0	?	0	525	Calibration	-	847	8.4934	5081.32	0	?
848	8.5038	11471.5	0	?	0	525	Calibration	-	848	8.505	20266.2	0	?	0	525	Calibration	-	848	8.5035	7135.18	0	?	0	525	Calibration	-	848	8.5035	7163.13	0	?	0	525	Calibration	-	848	8.5046	5798.87	0	?	0	525	Calibration	-	848	8.5035	5075.75	0	?
849	8.5139	11242.9	0	?	0	525	Calibration	-	849	8.515	20211.9	0	?	0	525	Calibration	-	849	8.5135	7146.59	0	?	0	525	Calibration	-	849	8.5135	7160.45	0	?	0	525	Calibration	-	849	8.5146	5775.29	0	?	0	525	Calibration	-	849	8.5135	5080.44	0	?
850	8.5239	11127.1	0	?	0	525	Calibration	-	850	8.525	20258.5	0	?	0	525	Calibration	-	850	8.5235	7144.9	0	?	0	525	Calibration	-	850	8.5235	7153.85	0	?	0	525	Calibration	-	850	8.5246	5797.34	0	?	0	525	Calibration	-	850	8.5235	5106.34	0	?
851	8.5339	11113.5	0	?	0	525	Calibration	-	851	8.535	20272.6	0	?	0	525	Calibration	-	851	8.5335	7153.78	0	?	0	525	Calibration	-	851	8.5335	7153.06	0	?	0	525	Calibration	-	851	8.5346	5794.88	0	?	0	525	Calibration	-	851	8.5335	5109.64	0	?
852	8.5439	11088	0	?	0	525	Calibration	-	852	8.545	20155.8	0	?	0	525	Calibration	-	852	8.5435	7145.71	0	?	0	525	Calibration	-	852	8.5435	7144.03	0	?	0	525	Calibration	-	852	8.5447	5799.72	0	?	0	525	Calibration	-	852	8.5435	5084.84	0	?
853	8.5539	10989.1	0	?	0	525	Calibration	-	853	8.555	20130.5	0	?	0	525	Calibration	-	853	8.5535	7144.42	0	?	0	525	Calibration	-	853	8.5535	7134.83	0	?	0	525	Calibration	-	853	8.5547	5787.61	0	?	0	525	Calibration	-	853	8.5535	5109.65	0	?
854	8.5639	11080.3	0	?	0	525	Calibration	-	854	8.5651	20251.7	0	?	0	525	Calibration	-	854	8.5636	7146.88	0	?	0	525	Calibration	-	854	8.5636	7128.72	0	?	0	525	Calibration	-	854	8.5647	5801.51	0	?	0	525	Calibration	-	854	8.5636	5109.06	0	?
855	8.574	11200.8	0	?	0	525	Calibration	-	855	8.5751	20390.6	0	?	0	525	Calibration	-	855	8.5736	7137.34	0	?	0	525	Calibration	-	855	8.5736	7129.57	0	?	0	525	Calibration	-	855	8.5747	5791.2	0	?	0	525	Calibration	-	855	8.5736	5102.47	0	?
856	8.584	11408.6	0	?	0	525	Calibration	-	856	8.5851	20503.7	0	?	0	525	Calibration	-	856	8.5836	7133.16	0	?	0	525	Calibration	-	856	8.5836	7154.91	0	?	0	525	Calibration	-	856	8.5847	5783.78	0	?	0	525	Calibration	-	856	8.5836	5094.16	0	?
857	8.594	11493.1	0	?	0	525	Calibration	-	857	8.5951	20372	0	?	0	525	Calibration	-	857	8.5936	7133.61	0	?	0	525	Calibration	-	857	8.5936	7153	0	?	0	525	Calibration	-	857	8.5947	5794.6	0	?	0	525	Calibration	-	857	8.5936	5083.18	0	?
858	8.604	11479.5	0	?	0	525	Calibration	-	858	8.6051	20434.2	0	?	0	525	Calibration	-	858	8.6036	7139.3	0	?	0	525	Calibration	-	858	8.6036	7163.42	0	?	0	525	Calibration	-	858	8.6048	5810.23	0	?	0	525	Calibration	-	858	8.6036	5092.78	0	?
859	8.614	11507.4	0	?	0	525	Calibration	-	859	8.6152	20594.9	0	?	0	525	Calibration	-	859	8.6136	7144.72	0	?	0	525	Calibration	-	859	8.6136	7165.63	0	?	0	525	Calibration	-	859	8.6148	5813.61	0	?	0	525	Calibration	-	859	8.6136	5084.26	0	?
860	8.624	11457.4	0	?	0	525	Calibration	-	860	8.6252	20814.5	0	?	0	525	Calibration	-	860	8.6237	7136.37	0	?	0	525	Calibration	-	860	8.6237	7154.2	0	?	0	525	Calibration	-	860	8.6248	5785.73	0	?	0	525	Calibration	-	860	8.6237	5088.59	0	?
861	8.6341	11218.8	0	?	0	525	Calibration	-	861	8.6352	20832.7	0	?	0	525	Calibration	-	861	8.6337	7137.89	0	?	0	525	Calibration	-	861	8.6337	7158.8	0	?	0	525	Calibration	-	861	8.6348	5811.56	0	?	0	525	Calibration	-	861	8.6337	5082.49	0	?
862	8.6441	11017.6	0	?	0	525	Calibration	-	862	8.6452	20621.7	0	?	0	525	Calibration	-	862	8.6437	7135.02	0	?	0	525	Calibration	-	862	8.6437	7163.52	0	?	0	525	Calibration	-	862	8.6448	5807.61	0	?	0	525	Calibration	-	862	8.6437	5082.6	0	?
863	8.6541	10930.1	0	?	0	525	Calibration	-	863	8.6552	20454.9	0	?	0	525	Calibration	-	863	8.6537	7125.13	0	?	0	525	Calibration	-	863	8.6537	7156.09	0	?	0	525	Calibration	-	863	8.6548	5796.43	0	?	0	525	Calibration	-	863	8.6537	5089.87	0	?
864	8.6641	10776.3	0	?	0	525	Calibration	-	864	8.6652	20361.7	0	?	0	525	Calibration	-	864	8.6637	7113.65	0	?	0	525	Calibration	-	864	8.6637	7150.97	0	?	0	525	Calibration	-	864	8.6649	5808.44	0	?	0	525	Calibration	-	864	8.6637	5076.3	0	?
865	8.6741	10598.3	0	?	0	525	Calibration	-	865	8.6753	20196	0	?	0	525	Calibration	-	865	8.6737	7141.28	0	?	0	525	Calibration	-	865	8.6737	7150.3	0	?	0	525	Calibration	-	865	8.6749	5781.63	0	?	0	525	Calibration	-	865	8.6737	5083.19	0	?
866	8.6841	10616.1	0	?	0	525	Calibration	-	866	8.6853	20158.7	0	?	0	525	Calibration	-	866	8.6837	7142.89	0	?	0	525	Calibration	-	866	8.6837	7144.78	0	?	0	525	Calibration	-	866	8.6849	5790.19	0	?	0	525	Calibration	-	866	8.6837	5083.54	0	?
867	8.6941	10605.4	0	?	0	525	Calibration	-	867	8.6953	20224.2	0	?	0	525	Calibration	-	867	8.6938	7148.8	0	?	0	525	Calibration	-	867	8.6938	7143.64	0	?	0	525	Calibration	-	867	8.6949	5813.28	0	?	0	525	Calibration	-	867	8.6938	5086.33	0	?
868	8.7042	10589	0	?	0	525	Calibration	-	868	8.7053	20337	0	?	0	525	Calibration	-	868	8.7038	7152.99	0	?	0	525	Calibration	-	868	8.7038	7140.65	0	?	0	525	Calibration	-	868	8.7049	5775.64	0	?	0	525	Calibration	-	868	8.7038	5080.27	0	?
869	8.7142	10524.5	0	?	0	525	Calibration	-	869	8.7153	20305.8	0	?	0	525	Calibration	-	869	8.7138	7143.01	0	?	0	525	Calibration	-	869	8.7138	7155.19	0	?	0	525	Calibration	-	869	8.7149	5774.55	0	?	0	525	Calibration	-	869	8.7138	5092.02	0	?
870	8.7242	10573.1	0	?	0	525	Calibration	-	870	8.7253	20246.5	0	?	0	525	Calibration	-	870	8.7238	7127.76	0	?	0	525	Calibration	-	870	8.7238	7153.76	0	?	0	525	Calibration	-	870	8.725	5767.02	0	?	0	525	Calibration	-	870	8.7238	5077.13	0	?
871	8.7342	10559	0	?	0	525	Calibration	-	871	8.7354	20304.8	0	?	0	525	Calibration	-	871	8.7338	7136.41	0	?	0	525	Calibration	-	871	8.7338	7149.88	0	?	0	525	Calibration	-	871	8.735	5788.7	0	?	0	525	Calibration	-	871	8.7338	5073.27	0	?
872	8.7442	10591.1	0	?	0	525	Calibration	-	872	8.7454	20274.9	0	?	0	525	Calibration	-	872	8.7438	7127.21	0	?	0	525	Calibration	-	872	8.7438	7133.6	0	?	0	525	Calibration	-	872	8.745	5778.55	0	?	0	525	Calibration	-	872	8.7438	5103.43	0	?
873	8.7542	10631.2	0	?	0	525	Calibration	-	873	8.7554	20393.1	0	?	0	525	Calibration	-	873	8.7539	7129.18	0	?	0	525	Calibration	-	873	8.7539	7137.88	0	?	0	525	Calibration	-	873	8.755	5781.34	0	?	0	525	Calibration	-	873	8.7539	5103.26	0	?
874	8.7643	10625.4	0	?	0	525	Calibration	-	874	8.7654	20360.7	0	?	0	525	Calibration	-	874	8.7639	7123.24	0	?	0	525	Calibration	-	874	8.7639	7137.74	0	?	0	525	Calibration	-	874	8.765	5770.75	0	?	0	525	Calibration	-	874	8.7639	5104.54	0	?
875	8.7743	10707.4	0	?	0	525	Calibration	-	875	8.7754	20287.6	0	?	0	525	Calibration	-	875	8.7739	7146.5	0	?	0	525	Calibration	-	875	8.7739	7125.08	0	?	0	525	Calibration	-	875	8.7751	5785.88	0	?	0	525	Calibration	-	875	8.7739	5091.9	0	?
876	8.7843	10702.8	0	?	0	525	Calibration	-	876	8.7855	20225.5	0	?	0	525	Calibration	-	876	8.7839	7138.53	0	?	0	525	Calibration	-	876	8.7839	7141.43	0	?	0	525	Calibration	-	876	8.7851	5769.64	0	?	0	525	Calibration	-	876	8.7839	5093.59	0	?
877	8.7943	10687.1	0	?	0	525	Calibration	-	877	8.7955	20041.2	0	?	0	525	Calibration	-	877	8.7939	7139.05	0	?	0	525	Calibration	-	877	8.7939	7128.07	0	?	0	525	Calibration	-	877	8.7951	5775.55	0	?	0	525	Calibration	-	877	8.7939	5073.45	0	?
878	8.8043	10751	0	?	0	525	Calibration	-	878	8.8055	20000.7	0	?	0	525	Calibration	-	878	8.8039	7151.51	0	?	0	525	Calibration	-	878	8.8039	7148.25	0	?	0	525	Calibration	-	878	8.8051	5786.07	0	?	0	525	Calibration	-	878	8.8039	5069.04	0	?
879	8.8143	10854.2	0	?	0	525	Calibration	-	879	8.8155	20050.9	0	?	0	525	Calibration	-	879	8.814	7146.63	0	?	0	525	Calibration	-	879	8.814	7155.17	0	?	0	525	Calibration	-	879	8.8151	5755.3	0	?	0	525	Calibration	-	879	8.814	5076.67	0	?
880	8.8244	11016.4	0	?	0	525	Calibration	-	880	8.8255	20147.9	0	?	0	525	Calibration	-	880	8.824	7135.52	0	?	0	525	Calibration	-	880	8.824	7144.87	0	?	0	525	Calibration	-	880	8.8251	5772.41	0	?	0	525	Calibration	-	880	8.824	5089.41	0	?
881	8.8344	11123.6	0	?	0	525	Calibration	-	881	8.8355	20125.9	0	?	0	525	Calibration	-	881	8.834	7130.83	0	?	0	525	Calibration	-	881	8.834	7154.46	0	?	0	525	Calibration	-	881	8.8352	5758.63	0	?	0	525	Calibration	-	881	8.834	5073.82	0	?
882	8.8444	11206.2	0	?	0	525	Calibration	-	882	8.8456	20072.4	0	?	0	525	Calibration	-	882	8.844	7137.56	0	?	0	525	Calibration	-	882	8.844	7161.63	0	?	0	525	Calibration	-	882	8.8452	5787.87	0	?	0	525	Calibration	-	882	8.844	5066.78	0	?
883	8.8544	11166.1	0	?	0	525	Calibration	-	883	8.8556	20036.9	0	?	0	525	Calibration	-	883	8.854	7153.99	0	?	0	525	Calibration	-	883	8.854	7174.93	0	?	0	525	Calibration	-	883	8.8552	5775.9	0	?	0	525	Calibration	-	883	8.854	5099.84	0	?
884	8.8644	11090.2	0	?	0	525	Calibration	-	884	8.8656	19962.2	0	?	0	525	Calibration	-	884	8.864	7153.36	0	?	0	525	Calibration	-	884	8.864	7184.65	0	?	0	525	Calibration	-	884	8.8652	5760.41	0	?	0	525	Calibration	-	884	8.864	5093.9	0	?
885	8.8744	11036.4	0	?	0	525	Calibration	-	885	8.8756	19982.4	0	?	0	525	Calibration	-	885	8.8741	7156.2	0	?	0	525	Calibration	-	885	8.8741	7169.05	0	?	0	525	Calibration	-	885	8.8752	5769.3	0	?	0	525	Calibration	-	885	8.8741	5094.97	0	?
886	8.8845	11025.8	0	?	0	525	Calibration	-	886	8.8856	20252	0	?	0	525	Calibration	-	886	8.8841	7131.1	0	?	0	525	Calibration	-	886	8.8841	7150.95	0	?	0	525	Calibration	-	886	8.8852	5803.74	0	?	0	525	Calibration	-	886	8.8841	5082.52	0	?
887	8.8945	11069.9	0	?	0	525	Calibration	-	887	8.8956	20460.1	0	?	0	525	Calibration	-	887	8.8941	7114.45	0	?	0	525	Calibration	-	887	8.8941	7149.16	0	?	0	525	Calibration	-	887	8.8953	5799.07	0	?	0	525	Calibration	-	887	8.8941	5091.91	0	?
888	8.9045	11150.6	0	?	0	525	Calibration	-	888	8.9057	20538.3	0	?	0	525	Calibration	-	888	8.9041	7123.57	0	?	0	525	Calibration	-	888	8.9041	7132.89	0	?	0	525	Calibration	-	888	8.9053	5786.05	0	?	0	525	Calibration	-	888	8.9041	5097.51	0	?
889	8.9145	11226.3	0	?	0	525	Calibration	-	889	8.9157	20400.5	0	?	0	525	Calibration	-	889	8.9141	7113.37	0	?	0	525	Calibration	-	889	8.9141	7126.09	0	?	0	525	Calibration	-	889	8.9153	5776.28	0	?	0	525	Calibration	-	889	8.9141	5082.08	0	?
890	8.9245	11255.9	0	?	0	525	Calibration	-	890	8.9257	20274	0	?	0	525	Calibration	-	890	8.9241	7136.77	0	?	0	525	Calibration	-	890	8.9241	7126.28	0	?	0	525	Calibration	-	890	8.9253	5762.97	0	?	0	525	Calibration	-	890	8.9241	5093.55	0	?
891	8.9345	11397	0	?	0	525	Calibration	-	891	8.9357	20102.5	0	?	0	525	Calibration	-	891	8.9341	7138.55	0	?	0	525	Calibration	-	891	8.9341	7148.29	0	?	0	525	Calibration	-	891	8.9353	5777.06	0	?	0	525	Calibration	-	891	8.9341	5080.87	0	?
892	8.9446	11465.9	0	?	0	525	Calibration	-	892	8.9457	20143.3	0	?	0	525	Calibration	-	892	8.9442	7134.26	0	?	0	525	Calibration	-	892	8.9442	7163.61	0	?	0	525	Calibration	-	892	8.9453	5787.62	0	?	0	525	Calibration	-	892	8.9442	5084.95	0	?
893	8.9546	11469.4	0	?	0	525	Calibration	-	893	8.9558	20115.6	0	?	0	525	Calibration	-	893	8.9542	7148.15	0	?	0	525	Calibration	-	893	8.9542	7141.86	0	?	0	525	Calibration	-	893	8.9554	5780.05	0	?	0	525	Calibration	-	893	8.9542	5094.78	0	?
894	8.9646	11451.1	0	?	0	525	Calibration	-	894	8.9658	19942.5	0	?	0	525	Calibration	-	894	8.9642	7147.86	0	?	0	525	Calibration	-	894	8.9642	7144.76	0	?	0	525	Calibration	-	894	8.9654	5791.81	0	?	0	525	Calibration	-	894	8.9642	5103.61	0	?
895	8.9746	11264.7	0	?	0	525	Calibration	-	895	8.9758	19917.9	0	?	0	525	Calibration	-	895	8.9742	7143.85	0	?	0	525	Calibration	-	895	8.9742	7135.16	0	?	0	525	Calibration	-	895	8.9754	5779.06	0	?	0	525	Calibration	-	895	8.9742	5096.77	0	?
896	8.9846	11129.5	0	?	0	525	Calibration	-	896	8.9858	19907	0	?	0	525	Calibration	-	896	8.9842	7126.79	0	?	0	525	Calibration	-	896	8.9842	7138.31	0	?	0	525	Calibration	-	896	8.9854	5769.19	0	?	0	525	Calibration	-	896	8.9842	5096.04	0	?
897	8.9946	10980.1	0	?	0	525	Calibration	-	897	8.9958	19907	0	?	0	525	Calibration	-	897	8.9942	7134.44	0	?	0	525	Calibration	-	897	8.9942	7144.34	0	?	0	525	Calibration	-	897	8.9954	5783.66	0	?	0	525	Calibration	-	897	8.9942	5071.86	0	?
898	9.0047	10924	0	?	0	525	Calibration	-	898	9.0058	19980.9	0	?	0	525	Calibration	-	898	9.0043	7155.69	0	?	0	525	Calibration	-	898	9.0043	7140.27	0	?	0	525	Calibration	-	898	9.0054	5771.59	0	?	0	525	Calibration	-	898	9.0043	5082.33	0	?
899	9.0147	10855.2	0	?	0	525	Calibration	-	899	9.0159	20124.5	0	?	0	525	Calibration	-	899	9.0143	7134.63	0	?	0	525	Calibration	-	899	9.0143	7135.73	0	?	0	525	Calibration	-	899	9.0155	5785.37	0	?	0	525	Calibration	-	899	9.0143	5075.24	0	?
900	9.0247	10809.2	0	?	0	525	Calibration	-	900	9.0259	20124	0	?	0	525	Calibration	-	900	9.0243	7119.74	0	?	0	525	Calibration	-	900	9.0243	7131.1	0	?	0	525	Calibration	-	900	9.0255	5789.31	0	?	0	525	Calibration	-	900	9.0243	5078.8	0	?
901	9.0347	10812.5	0	?	0	525	Calibration	-	901	9.0359	20075.1	0	?	0	525	Calibration	-	901	9.0343	7119.14	0	?	0	525	Calibration	-	901	9.0343	7127.22	0	?	0	525	Calibration	-	901	9.0355	5786.37	0	?	0	525	Calibration	-	901	9.0343	5081.67	0	?
902	9.0447	10785.3	0	?	0	525	Calibration	-	902	9.0459	20118.5	0	?	0	525	Calibration	-	902	9.0443	7139.09	0	?	0	525	Calibration	-	902	9.0443	7114.61	0	?	0	525	Calibration	-	902	9.0455	5779.6	0	?	0	525	Calibration	-	902	9.0443	5065.61	0	?
903	9.0547	10800.2	0	?	0	525	Calibration	-	903	9.0559	20112.5	0	?	0	525	Calibration	-	903	9.0543	7135.35	0	?	0	525	Calibration	-	903	9.0543	7122.95	0	?	0	525	Calibration	-	903	9.0555	5766.26	0	?	0	525	Calibration	-	903	9.0543	5070.31	0	?
904	9.0648	10766.7	0	?	0	525	Calibration	-	904	9.0659	20141.1	0	?	0	525	Calibration	-	904	9.0644	7127.95	0	?	0	525	Calibration	-	904	9.0644	7134.99	0	?	0	525	Calibration	-	904	9.0655	5777.68	0	?	0	525	Calibration	-	904	9.0644	5079.44	0	?
905	9.0748	10758.3	0	?	0	525	Calibration	-	905	9.076	20094	0	?	0	525	Calibration	-	905	9.0744	7133.06	0	?	0	525	Calibration	-	905	9.0744	7139.47	0	?	0	525	Calibration	-	905	9.0756	5777.33	0	?	0	525	Calibration	-	905	9.0744	5078.78	0	?
906	9.0848	10824.1	0	?	0	525	Calibration	-	906	9.086	19998.7	0	?	0	525	Calibration	-	906	9.0844	7133.86	0	?	0	525	Calibration	-	906	9.0844	7135.47	0	?	0	525	Calibration	-	906	9.0856	5755.04	0	?	0	525	Calibration	-	906	9.0844	5074.58	0	?
907	9.0948	10786.4	0	?	0	525	Calibration	-	907	9.096	19995.2	0	?	0	525	Calibration	-	907	9.0944	7125.4	0	?	0	525	Calibration	-	907	9.0944	7116.5	0	?	0	525	Calibration	-	907	9.0956	5769.36	0	?	0	525	Calibration	-	907	9.0944	5074.65	0	?
908	9.1048	10784.8	0	?	0	525	Calibration	-	908	9.106	19892.9	0	?	0	525	Calibration	-	908	9.1044	7115.24	0	?	0	525	Calibration	-	908	9.1044	7110.89	0	?	0	525	Calibration	-	908	9.1056	5748.19	0	?	0	525	Calibration	-	908	9.1044	5072.39	0	?
909	9.1148	10871.6	0	?	0	525	Calibration	-	909	9.116	19791.2	0	?	0	525	Calibration	-	909	9.1144	7115.49	0	?	0	525	Calibration	-	909	9.1144	7127.15	0	?	0	525	Calibration	-	909	9.1156	5783.7	0	?	0	525	Calibration	-	909	9.1144	5093.8	0	?
910	9.1248	10826.9	0	?	0	525	Calibration	-	910	9.1261	19781.9	0	?	0	525	Calibration	-	910	9.1244	7108.84	0	?	0	525	Calibration	-	910	9.1244	7118.66	0	?	0	525	Calibration	-	910	9.1257	5761.71	0	?	0	525	Calibration	-	910	9.1244	5073.59	0	?
911	9.1349	10866.2	0	?	0	525	Calibration	-	911	9.1361	19756.3	0	?	0	525	Calibration	-	911	9.1345	7111.26	0	?	0	525	Calibration	-	911	9.1345	7125.64	0	?	0	525	Calibration	-	911	9.1357	5768.31	0	?	0	525	Calibration	-	911	9.1345	5073	0	?
912	9.1449	10958.7	0	?	0	525	Calibration	-	912	9.1461	19733.7	0	?	0	525	Calibration	-	912	9.1445	7118.52	0	?	0	525	Calibration	-	912	9.1445	7120.56	0	?	0	525	Calibration	-	912	9.1457	5758.71	0	?	0	525	Calibration	-	912	9.1445	5081.13	0	?
913	9.1549	11002.2	0	?	0	525	Calibration	-	913	9.1561	19683.4	0	?	0	525	Calibration	-	913	9.1545	7129.74	0	?	0	525	Calibration	-	913	9.1545	7116.62	0	?	0	525	Calibration	-	913	9.1557	5782.05	0	?	0	525	Calibration	-	913	9.1545	5073.11	0	?
914	9.1649	11042.7	0	?	0	525	Calibration	-	914	9.1661	19870	0	?	0	525	Calibration	-	914	9.1645	7128.3	0	?	0	525	Calibration	-	914	9.1645	7124.11	0	?	0	525	Calibration	-	914	9.1657	5759.26	0	?	0	525	Calibration	-	914	9.1645	5081.92	0	?
915	9.1749	11103.5	0	?	0	525	Calibration	-	915	9.1761	19928.2	0	?	0	525	Calibration	-	915	9.1745	7110.43	0	?	0	525	Calibration	-	915	9.1745	7131.65	0	?	0	525	Calibration	-	915	9.1757	5775.84	0	?	0	525	Calibration	-	915	9.1745	5080.97	0	?
916	9.1849	11041.9	0	?	0	525	Calibration	-	916	9.1862	19884.3	0	?	0	525	Calibration	-	916	9.1845	7114.84	0	?	0	525	Calibration	-	916	9.1845	7110.61	0	?	0	525	Calibration	-	916	9.1858	5788.21	0	?	0	525	Calibration	-	916	9.1845	5090.21	0	?
917	9.195	11039.6	0	?	0	525	Calibration	-	917	9.1962	19842.3	0	?	0	525	Calibration	-	917	9.1946	7110.98	0	?	0	525	Calibration	-	917	9.1946	7130.36	0	?	0	525	Calibration	-	917	9.1958	5754.64	0	?	0	525	Calibration	-	917	9.1946	5072.29	0	?
918	9.205	11034	0	?	0	525	Calibration	-	918	9.2062	19840.3	0	?	0	525	Calibration	-	918	9.2046	7110.73	0	?	0	525	Calibration	-	918	9.2046	7129.74	0	?	0	525	Calibration	-	918	9.2058	5753.57	0	?	0	525	Calibration	-	918	9.2046	5073.41	0	?
919	9.215	11051.7	0	?	0	525	Calibration	-	919	9.2162	19876.9	0	?	0	525	Calibration	-	919	9.2146	7117.49	0	?	0	525	Calibration	-	919	9.2146	7123.43	0	?	0	525	Calibration	-	919	9.2158	5770.22	0	?	0	525	Calibration	-	919	9.2146	5059.73	0	?
920	9.225	11102.6	0	?	0	525	Calibration	-	920	9.2262	19948.3	0	?	0	525	Calibration	-	920	9.2246	7123.77	0	?	0	525	Calibration	-	920	9.2246	7110.19	0	?	0	525	Calibration	-	920	9.2258	5771.26	0	?	0	525	Calibration	-	920	9.2246	5068.2	0	?
921	9.235	11133.1	0	?	0	525	Calibration	-	921	9.2362	19986.1	0	?	0	525	Calibration	-	921	9.2346	7120.05	0	?	0	525	Calibration	-	921	9.2346	7113.61	0	?	0	525	Calibration	-	921	9.2358	5777.09	0	?	0	525	Calibration	-	921	9.2346	5048.35	0	?
922	9.245	11097.4	0	?	0	525	Calibration	-	922	9.2463	20019.1	0	?	0	525	Calibration	-	922	9.2446	7095.01	0	?	0	525	Calibration	-	922	9.2446	7115.8	0	?	0	525	Calibration	-	922	9.2459	5782.93	0	?	0	525	Calibration	-	922	9.2446	5081.38	0	?
923	9.2551	11063.6	0	?	0	525	Calibration	-	923	9.2563	19908.9	0	?	0	525	Calibration	-	923	9.2547	7109.1	0	?	0	525	Calibration	-	923	9.2547	7131.36	0	?	0	525	Calibration	-	923	9.2559	5750.57	0	?	0	525	Calibration	-	923	9.2547	5084.45	0	?
924	9.2651	11018.8	0	?	0	525	Calibration	-	924	9.2663	19884.8	0	?	0	525	Calibration	-	924	9.2647	7107.42	0	?	0	525	Calibration	-	924	9.2647	7127.85	0	?	0	525	Calibration	-	924	9.2659	5744.62	0	?	0	525	Calibration	-	924	9.2647	5099.39	0	?
925	9.2751	10915.3	0	?	0	525	Calibration	-	925	9.2763	19769.4	0	?	0	525	Calibration	-	925	9.2747	7127.19	0	?	0	525	Calibration	-	925	9.2747	7118.25	0	?	0	525	Calibration	-	925	9.2759	5771.87	0	?	0	525	Calibration	-	925	9.2747	5064.1	0	?
926	9.2851	10908	0	?	0	525	Calibration	-	926	9.2863	19776.8	0	?	0	525	Calibration	-	926	9.2847	7121.32	0	?	0	525	Calibration	-	926	9.2847	7137.78	0	?	0	525	Calibration	-	926	9.2859	5758.18	0	?	0	525	Calibration	-	926	9.2847	5070.5	0	?
927	9.2951	10982.5	0	?	0	525	Calibration	-	927	9.2964	19953	0	?	0	525	Calibration	-	927	9.2947	7113.24	0	?	0	525	Calibration	-	927	9.2947	7156.77	0	?	0	525	Calibration	-	927	9.2959	5774.85	0	?	0	525	Calibration	-	927	9.2947	5078.21	0	?
928	9.3051	11054.1	0	?	0	525	Calibration	-	928	9.3064	20052.9	0	?	0	525	Calibration	-	928	9.3047	7114.7	0	?	0	525	Calibration	-	928	9.3047	7153.69	0	?	0	525	Calibration	-	928	9.306	5777.58	0	?	0	525	Calibration	-	928	9.3047	5086.86	0	?
929	9.3152	11214.9	0	?	0	525	Calibration	-	929	9.3164	20084.4	0	?	0	525	Calibration	-	929	9.3147	7113.67	0	?	0	525	Calibration	-	929	9.3147	7130.65	0	?	0	525	Calibration	-	929	9.316	5766.14	0	?	0	525	Calibration	-	929	9.3147	5063.1	0	?
930	9.3252	11370.7	0	?	0	525	Calibration	-	930	9.3264	19991	0	?	0	525	Calibration	-	930	9.3248	7118.91	0	?	0	525	Calibration	-	930	9.3248	7127.51	0	?	0	525	Calibration	-	930	9.326	5770.35	0	?	0	525	Calibration	-	930	9.3248	5067.94	0	?
931	9.3352	11437.7	0	?	0	525	Calibration	-	931	9.3364	19919.8	0	?	0	525	Calibration	-	931	9.3348	7103.44	0	?	0	525	Calibration	-	931	9.3348	7118.32	0	?	0	525	Calibration	-	931	9.336	5774.74	0	?	0	525	Calibration	-	931	9.3348	5077.67	0	?
932	9.3452	11314.7	0	?	0	525	Calibration	-	932	9.3464	19876.4	0	?	0	525	Calibration	-	932	9.3448	7118.41	0	?	0	525	Calibration	-	932	9.3448	7108.07	0	?	0	525	Calibration	-	932	9.346	5759.71	0	?	0	525	Calibration	-	932	9.3448	5067.02	0	?
933	9.3552	11244.2	0	?	0	525	Calibration	-	933	9.3565	19849.7	0	?	0	525	Calibration	-	933	9.3548	7090.79	0	?	0	525	Calibration	-	933	9.3548	7119.72	0	?	0	525	Calibration	-	933	9.356	5783.33	0	?	0	525	Calibration	-	933	9.3548	5057.45	0	?
934	9.3652	11107.8	0	?	0	525	Calibration	-	934	9.3665	19885.1	0	?	0	525	Calibration	-	934	9.3648	7107.96	0	?	0	525	Calibration	-	934	9.3648	7132.04	0	?	0	525	Calibration	-	934	9.3661	5767.49	0	?	0	525	Calibration	-	934	9.3648	5066.44	0	?
935	9.3753	11084	0	?	0	525	Calibration	-	935	9.3765	19854.7	0	?	0	525	Calibration	-	935	9.3748	7088.47	0	?	0	525	Calibration	-	935	9.3748	7128.06	0	?	0	525	Calibration	-	935	9.3761	5759.41	0	?	0	525	Calibration	-	935	9.3748	5064.11	0	?
936	9.3853	11132.2	0	?	0	525	Calibration	-	936	9.3865	19931.6	0	?	0	525	Calibration	-	936	9.3849	7109.27	0	?	0	525	Calibration	-	936	9.3849	7137.27	0	?	0	525	Calibration	-	936	9.3861	5776.39	0	?	0	525	Calibration	-	936	9.3849	5066.69	0	?
937	9.3953	11220	0	?	0	525	Calibration	-	937	9.3965	19803	0	?	0	525	Calibration	-	937	9.3949	7113.63	0	?	0	525	Calibration	-	937	9.3949	7133.06	0	?	0	525	Calibration	-	937	9.3961	5752.35	0	?	0	525	Calibration	-	937	9.3949	5087.67	0	?
938	9.4053	11347.9	0	?	0	525	Calibration	-	938	9.4065	19782.1	0	?	0	525	Calibration	-	938	9.4049	7105.38	0	?	0	525	Calibration	-	938	9.4049	7152.81	0	?	0	525	Calibration	-	938	9.4061	5748.41	0	?	0	525	Calibration	-	938	9.4049	5077.33	0	?
939	9.4153	11418.3	0	?	0	525	Calibration	-	939	9.4166	19762.9	0	?	0	525	Calibration	-	939	9.4149	7099.6	0	?	0	525	Calibration	-	939	9.4149	7158.36	0	?	0	525	Calibration	-	939	9.4161	5757.48	0	?	0	525	Calibration	-	939	9.4149	5065.51	0	?
940	9.4253	11441.1	0	?	0	525	Calibration	-	940	9.4266	19763.3	0	?	0	525	Calibration	-	940	9.4249	7117.72	0	?	0	525	Calibration	-	940	9.4249	7124.89	0	?	0	525	Calibration	-	940	9.4262	5735.51	0	?	0	525	Calibration	-	940	9.4249	5079.25	0	?
941	9.4354	11353.7	0	?	0	525	Calibration	-	941	9.4366	19948.1	0	?	0	525	Calibration	-	941	9.4349	7110.03	0	?	0	525	Calibration	-	941	9.4349	7122.19	0	?	0	525	Calibration	-	941	9.4362	5750.92	0	?	0	525	Calibration	-	941	9.4349	5078.9	0	?
942	9.4454	11212.7	0	?	0	525	Calibration	-	942	9.4466	20009.6	0	?	0	525	Calibration	-	942	9.445	7097.44	0	?	0	525	Calibration	-	942	9.445	7127.33	0	?	0	525	Calibration	-	942	9.4462	5729.72	0	?	0	525	Calibration	-	942	9.445	5067.67	0	?
943	9.4554	11144.1	0	?	0	525	Calibration	-	943	9.4566	20061.8	0	?	0	525	Calibration	-	943	9.455	7102.53	0	?	0	525	Calibration	-	943	9.455	7134.94	0	?	0	525	Calibration	-	943	9.4562	5727.26	0	?	0	525	Calibration	-	943	9.455	5072.44	0	?
944	9.4654	11169.4	0	?	0	525	Calibration	-	944	9.4667	19997.4	0	?	0	525	Calibration	-	944	9.465	7095.14	0	?	0	525	Calibration	-	944	9.465	7129.57	0	?	0	525	Calibration	-	944	9.4662	5741.73	0	?	0	525	Calibration	-	944	9.465	5085.59	0	?
945	9.4754	11091.1	0	?	0	525	Calibration	-	945	9.4767	19962	0	?	0	525	Calibration	-	945	9.475	7104	0	?	0	525	Calibration	-	945	9.475	7120.05	0	?	0	525	Calibration	-	945	9.4763	5739.13	0	?	0	525	Calibration	-	945	9.475	5069.88	0	?
946	9.4854	10987.3	0	?	0	525	Calibration	-	946	9.4867	19830.4	0	?	0	525	Calibration	-	946	9.485	7107.76	0	?	0	525	Calibration	-	946	9.485	7112.49	0	?	0	525	Calibration	-	946	9.4863	5744.7	0	?	0	525	Calibration	-	946	9.485	5066.54	0	?
947	9.4955	10921.4	0	?	0	525	Calibration	-	947	9.4967	19846.4	0	?	0	525	Calibration	-	947	9.495	7103.38	0	?	0	525	Calibration	-	947	9.495	7130.46	0	?	0	525	Calibration	-	947	9.4963	5763.4	0	?	0	525	Calibration	-	947	9.495	5074.26	0	?
948	9.5055	10805	0	?	0	525	Calibration	-	948	9.5067	19890.6	0	?	0	525	Calibration	-	948	9.5051	7097.44	0	?	0	525	Calibration	-	948	9.5051	7129.29	0	?	0	525	Calibration	-	948	9.5063	5753.59	0	?	0	525	Calibration	-	948	9.5051	5077.04	0	?
949	9.5155	10784.3	0	?	0	525	Calibration	-	949	9.5167	19801.7	0	?	0	525	Calibration	-	949	9.5151	7094.54	0	?	0	525	Calibration	-	949	9.5151	7131.05	0	?	0	525	Calibration	-	949	9.5163	5736.39	0	?	0	525	Calibration	-	949	9.5151	5070.46	0	?
950	9.5255	10817.7	0	?	0	525	Calibration	-	950	9.5268	19763.4	0	?	0	525	Calibration	-	950	9.5251	7097.8	0	?	0	525	Calibration	-	950	9.5251	7093.42	0	?	0	525	Calibration	-	950	9.5263	5762.92	0	?	0	525	Calibration	-	950	9.5251	5057.73	0	?
951	9.5355	10878	0	?	0	525	Calibration	-	951	9.5368	19760.6	0	?	0	525	Calibration	-	951	9.5351	7104.8	0	?	0	525	Calibration	-	951	9.5351	7080.19	0	?	0	525	Calibration	-	951	9.5364	5760.13	0	?	0	525	Calibration	-	951	9.5351	5069.33	0	?
952	9.5455	10939.2	0	?	0	525	Calibration	-	952	9.5468	19856.7	0	?	0	525	Calibration	-	952	9.5451	7100.82	0	?	0	525	Calibration	-	952	9.5451	7093.29	0	?	0	525	Calibration	-	952	9.5464	5761.18	0	?	0	525	Calibration	-	952	9.5451	5069.16	0	?
953	9.5555	10999.5	0	?	0	525	Calibration	-	953	9.5568	19969	0	?	0	525	Calibration	-	953	9.5551	7092.17	0	?	0	525	Calibration	-	953	9.5551	7104.18	0	?	0	525	Calibration	-	953	9.5564	5749.51	0	?	0	525	Calibration	-	953	9.5551	5060.3	0	?
954	9.5656	11035.6	0	?	0	525	Calibration	-	954	9.5668	20038.9	0	?	0	525	Calibration	-	954	9.5651	7094.57	0	?	0	525	Calibration	-	954	9.5651	7113.36	0	?	0	525	Calibration	-	954	9.5664	5760.64	0	?	0	525	Calibration	-	954	9.5651	5076.12	0	?
955	9.5756	11021.4	0	?	0	525	Calibration	-	955	9.5768	19926.5	0	?	0	525	Calibration	-	955	9.5752	7122.53	0	?	0	525	Calibration	-	955	9.5752	7124.55	0	?	0	525	Calibration	-	955	9.5764	5767.27	0	?	0	525	Calibration	-	955	9.5752	5072.18	0	?
956	9.5856	10892.7	0	?	0	525	Calibration	-	956	9.5869	19819.5	0	?	0	525	Calibration	-	956	9.5852	7111.23	0	?	0	525	Calibration	-	956	9.5852	7129.76	0	?	0	525	Calibration	-	956	9.5864	5758.56	0	?	0	525	Calibration	-	956	9.5852	5075.48	0	?
957	9.5956	10870.5	0	?	0	525	Calibration	-	957	9.5969	19658.2	0	?	0	525	Calibration	-	957	9.5952	7107.33	0	?	0	525	Calibration	-	957	9.5952	7125.15	0	?	0	525	Calibration	-	957	9.5965	5755.63	0	?	0	525	Calibration	-	957	9.5952	5065.94	0	?
958	9.6056	10852.1	0	?	0	525	Calibration	-	958	9.6069	19598.4	0	?	0	525	Calibration	-	958	9.6052	7089.9	0	?	0	525	Calibration	-	958	9.6052	7128.23	0	?	0	525	Calibration	-	958	9.6065	5758.76	0	?	0	525	Calibration	-	958	9.6052	5078.88	0	?
959	9.6156	10964.6	0	?	0	525	Calibration	-	959	9.6169	19654.8	0	?	0	525	Calibration	-	959	9.6152	7095.6	0	?	0	525	Calibration	-	959	9.6152	7124.37	0	?	0	525	Calibration	-	959	9.6165	5741.38	0	?	0	525	Calibration	-	959	9.6152	5065.67	0	?
960	9.6257	11078.8	0	?	0	525	Calibration	-	960	9.6269	19720	0	?	0	525	Calibration	-	960	9.6252	7110.84	0	?	0	525	Calibration	-	960	9.6252	7127.36	0	?	0	525	Calibration	-	960	9.6265	5744.62	0	?	0	525	Calibration	-	960	9.6252	5066.78	0	?
961	9.6357	11124.5	0	?	0	525	Calibration	-	961	9.637	19888.1	0	?	0	525	Calibration	-	961	9.6353	7103.35	0	?	0	525	Calibration	-	961	9.6353	7147.02	0	?	0	525	Calibration	-	961	9.6365	5747.91	0	?	0	525	Calibration	-	961	9.6353	5058.82	0	?
962	9.6457	11054.2	0	?	0	525	Calibration	-	962	9.647	19931.4	0	?	0	525	Calibration	-	962	9.6453	7103.46	0	?	0	525	Calibration	-	962	9.6453	7127.73	0	?	0	525	Calibration	-	962	9.6465	5754.01	0	?	0	525	Calibration	-	962	9.6453	5056.86	0	?
963	9.6557	11032.8	0	?	0	525	Calibration	-	963	9.657	19859	0	?	0	525	Calibration	-	963	9.6553	7119.32	0	?	0	525	Calibration	-	963	9.6553	7098.65	0	?	0	525	Calibration	-	963	9.6566	5762.94	0	?	0	525	Calibration	-	963	9.6553	5070.97	0	?
964	9.6657	11064.9	0	?	0	525	Calibration	-	964	9.667	19791	0	?	0	525	Calibration	-	964	9.6653	7101.71	0	?	0	525	Calibration	-	964	9.6653	7100.31	0	?	0	525	Calibration	-	964	9.6666	5733.07	0	?	0	525	Calibration	-	964	9.6653	5080.06	0	?
965	9.6757	11044.1	0	?	0	525	Calibration	-	965	9.677	19753.1	0	?	0	525	Calibration	-	965	9.6753	7125.24	0	?	0	525	Calibration	-	965	9.6753	7094.49	0	?	0	525	Calibration	-	965	9.6766	5748.63	0	?	0	525	Calibration	-	965	9.6753	5077.49	0	?
966	9.6858	10845.2	0	?	0	525	Calibration	-	966	9.687	19976.5	0	?	0	525	Calibration	-	966	9.6853	7125.29	0	?	0	525	Calibration	-	966	9.6853	7127.85	0	?	0	525	Calibration	-	966	9.6866	5751.1	0	?	0	525	Calibration	-	966	9.6853	5058.22	0	?
967	9.6958	10745.7	0	?	0	525	Calibration	-	967	9.6971	20145.8	0	?	0	525	Calibration	-	967	9.6954	7113.87	0	?	0	525	Calibration	-	967	9.6954	7122.84	0	?	0	525	Calibration	-	967	9.6966	5757.48	0	?	0	525	Calibration	-	967	9.6954	5041.26	0	?
968	9.7058	10787.6	0	?	0	525	Calibration	-	968	9.7071	20185.6	0	?	0	525	Calibration	-	968	9.7054	7120.51	0	?	0	525	Calibration	-	968	9.7054	7118.48	0	?	0	525	Calibration	-	968	9.7066	5744.48	0	?	0	525	Calibration	-	968	9.7054	5050.41	0	?
969	9.7158	10900.4	0	?	0	525	Calibration	-	969	9.7171	20212.4	0	?	0	525	Calibration	-	969	9.7154	7101.59	0	?	0	525	Calibration	-	969	9.7154	7146.58	0	?	0	525	Calibration	-	969	9.7167	5753.12	0	?	0	525	Calibration	-	969	9.7154	5074.43	0	?
970	9.7258	11029.1	0	?	0	525	Calibration	-	970	9.7271	20134.2	0	?	0	525	Calibration	-	970	9.7254	7096.48	0	?	0	525	Calibration	-	970	9.7254	7147.59	0	?	0	525	Calibration	-	970	9.7267	5756.62	0	?	0	525	Calibration	-	970	9.7254	5066.21	0	?
971	9.7358	11126	0	?	0	525	Calibration	-	971	9.7371	19947.5	0	?	0	525	Calibration	-	971	9.7354	7095.07	0	?	0	525	Calibration	-	971	9.7354	7133.92	0	?	0	525	Calibration	-	971	9.7367	5772.24	0	?	0	525	Calibration	-	971	9.7354	5056.92	0	?
972	9.7459	11161.9	0	?	0	525	Calibration	-	972	9.7471	19956.2	0	?	0	525	Calibration	-	972	9.7454	7088.39	0	?	0	525	Calibration	-	972	9.7454	7126.19	0	?	0	525	Calibration	-	972	9.7467	5770.68	0	?	0	525	Calibration	-	972	9.7454	5061.78	0	?
973	9.7559	11266.4	0	?	0	525	Calibration	-	973	9.7572	20021.9	0	?	0	525	Calibration	-	973	9.7554	7102.34	0	?	0	525	Calibration	-	973	9.7554	7119.88	0	?	0	525	Calibration	-	973	9.7567	5769.99	0	?	0	525	Calibration	-	973	9.7554	5060.47	0	?
974	9.7659	11316.9	0	?	0	525	Calibration	-	974	9.7672	20047.2	0	?	0	525	Calibration	-	974	9.7655	7090.56	0	?	0	525	Calibration	-	974	9.7655	7120.08	0	?	0	525	Calibration	-	974	9.7668	5754.51	0	?	0	525	Calibration	-	974	9.7655	5061.61	0	?
975	9.7759	11356.9	0	?	0	525	Calibration	-	975	9.7772	20073.6	0	?	0	525	Calibration	-	975	9.7755	7099.16	0	?	0	525	Calibration	-	975	9.7755	7126.13	0	?	0	525	Calibration	-	975	9.7768	5762.95	0	?	0	525	Calibration	-	975	9.7755	5060.93	0	?
976	9.7859	11395.8	0	?	0	525	Calibration	-	976	9.7872	20190.3	0	?	0	525	Calibration	-	976	9.7855	7092.12	0	?	0	525	Calibration	-	976	9.7855	7106.54	0	?	0	525	Calibration	-	976	9.7868	5778.8	0	?	0	525	Calibration	-	976	9.7855	5063.02	0	?
977	9.7959	11388.2	0	?	0	525	Calibration	-	977	9.7972	20261.3	0	?	0	525	Calibration	-	977	9.7955	7108.59	0	?	0	525	Calibration	-	977	9.7955	7099.32	0	?	0	525	Calibration	-	977	9.7968	5782.93	0	?	0	525	Calibration	-	977	9.7955	5053.12	0	?
978	9.806	11222.1	0	?	0	525	Calibration	-	978	9.8073	20272.8	0	?	0	525	Calibration	-	978	9.8055	7095.47	0	?	0	525	Calibration	-	978	9.8055	7079.25	0	?	0	525	Calibration	-	978	9.8068	5791.55	0	?	0	525	Calibration	-	978	9.8055	5074.74	0	?
979	9.816	11113.6	0	?	0	525	Calibration	-	979	9.8173	20103.4	0	?	0	525	Calibration	-	979	9.8155	7082.12	0	?	0	525	Calibration	-	979	9.8155	7096.69	0	?	0	525	Calibration	-	979	9.8168	5779.21	0	?	0	525	Calibration	-	979	9.8155	5070.87	0	?
980	9.826	11122.2	0	?	0	525	Calibration	-	980	9.8273	20005.9	0	?	0	525	Calibration	-	980	9.8256	7089.04	0	?	0	525	Calibration	-	980	9.8256	7093.13	0	?	0	525	Calibration	-	980	9.8269	5783.46	0	?	0	525	Calibration	-	980	9.8256	5084.43	0	?
981	9.836	11112.8	0	?	0	525	Calibration	-	981	9.8373	20067.8	0	?	0	525	Calibration	-	981	9.8356	7084.65	0	?	0	525	Calibration	-	981	9.8356	7107	0	?	0	525	Calibration	-	981	9.8369	5772.24	0	?	0	525	Calibration	-	981	9.8356	5087.11	0	?
982	9.846	11199.5	0	?	0	525	Calibration	-	982	9.8473	20146.8	0	?	0	525	Calibration	-	982	9.8456	7100.9	0	?	0	525	Calibration	-	982	9.8456	7111.14	0	?	0	525	Calibration	-	982	9.8469	5774.97	0	?	0	525	Calibration	-	982	9.8456	5089.09	0	?
983	9.856	11230.8	0	?	0	525	Calibration	-	983	9.8573	20149.3	0	?	0	525	Calibration	-	983	9.8556	7090.22	0	?	0	525	Calibration	-	983	9.8556	7116.73	0	?	0	525	Calibration	-	983	9.8569	5768.92	0	?	0	525	Calibration	-	983	9.8556	5076.09	0	?
984	9.8661	11093.2	0	?	0	525	Calibration	-	984	9.8674	20012.8	0	?	0	525	Calibration	-	984	9.8656	7098.34	0	?	0	525	Calibration	-	984	9.8656	7135.99	0	?	0	525	Calibration	-	984	9.8669	5764.25	0	?	0	525	Calibration	-	984	9.8656	5066.39	0	?
985	9.8761	10981.7	0	?	0	525	Calibration	-	985	9.8774	19945.1	0	?	0	525	Calibration	-	985	9.8756	7099.43	0	?	0	525	Calibration	-	985	9.8756	7121.13	0	?	0	525	Calibration	-	985	9.8769	5749.12	0	?	0	525	Calibration	-	985	9.8756	5063.29	0	?
986	9.8861	10974	0	?	0	525	Calibration	-	986	9.8874	19873	0	?	0	525	Calibration	-	986	9.8857	7093.94	0	?	0	525	Calibration	-	986	9.8857	7114.33	0	?	0	525	Calibration	-	986	9.887	5739	0	?	0	525	Calibration	-	986	9.8857	5073.58	0	?
987	9.8961	10940.2	0	?	0	525	Calibration	-	987	9.8974	19864.1	0	?	0	525	Calibration	-	987	9.8957	7090.67	0	?	0	525	Calibration	-	987	9.8957	7124.25	0	?	0	525	Calibration	-	987	9.897	5723.61	0	?	0	525	Calibration	-	987	9.8957	5088.72	0	?
988	9.9061	10959.1	0	?	0	525	Calibration	-	988	9.9074	19943.1	0	?	0	525	Calibration	-	988	9.9057	7106.77	0	?	0	525	Calibration	-	988	9.9057	7122.49	0	?	0	525	Calibration	-	988	9.907	5736.83	0	?	0	525	Calibration	-	988	9.9057	5070.95	0	?
989	9.9161	10943.9	0	?	0	525	Calibration	-	989	9.9174	20053.5	0	?	0	525	Calibration	-	989	9.9157	7096.08	0	?	0	525	Calibration	-	989	9.9157	7112.58	0	?	0	525	Calibration	-	989	9.917	5771.29	0	?	0	525	Calibration	-	989	9.9157	5071.02	0	?
990	9.9262	10972.9	0	?	0	525	Calibration	-	990	9.9275	20069.3	0	?	0	525	Calibration	-	990	9.9257	7102.85	0	?	0	525	Calibration	-	990	9.9257	7110.88	0	?	0	525	Calibration	-	990	9.927	5754.61	0	?	0	525	Calibration	-	990	9.9257	5062.29	0	?
991	9.9362	11079.9	0	?	0	525	Calibration	-	991	9.9375	20075.5	0	?	0	525	Calibration	-	991	9.9357	7093.16	0	?	0	525	Calibration	-	991	9.9357	7128.71	0	?	0	525	Calibration	-	991	9.937	5743.7	0	?	0	525	Calibration	-	991	9.9357	5091.07	0	?
992	9.9462	11148.8	0	?	0	525	Calibration	-	992	9.9475	19895.9	0	?	0	525	Calibration	-	992	9.9457	7102.34	0	?	0	525	Calibration	-	992	9.9457	7109.62	0	?	0	525	Calibration	-	992	9.9471	5750.64	0	?	0	525	Calibration	-	992	9.9457	5071.47	0	?
993	9.9562	11133.4	0	?	0	525	Calibration	-	993	9.9575	19835.7	0	?	0	525	Calibration	-	993	9.9558	7112.55	0	?	0	525	Calibration	-	993	9.9558	7085.54	0	?	0	525	Calibration	-	993	9.9571	5756.7	0	?	0	525	Calibration	-	993	9.9558	5061.96	0	?
994	9.9662	10959.2	0	?	0	525	Calibration	-	994	9.9675	19731	0	?	0	525	Calibration	-	994	9.9658	7111.83	0	?	0	525	Calibration	-	994	9.9658	7112.31	0	?	0	525	Calibration	-	994	9.9671	5753.13	0	?	0	525	Calibration	-	994	9.9658	5069.59	0	?
995	9.9762	10884.1	0	?	0	525	Calibration	-	995	9.9776	19709.5	0	?	0	525	Calibration	-	995	9.9758	7089.33	0	?	0	525	Calibration	-	995	9.9758	7100.85	0	?	0	525	Calibration	-	995	9.9771	5746.79	0	?	0	525	Calibration	-	995	9.9758	5087.19	0	?
996	9.9863	10852.7	0	?	0	525	Calibration	-	996	9.9876	19769.9	0	?	0	525	Calibration	-	996	9.9858	7094.54	0	?	0	525	Calibration	-	996	9.9858	7111.96	0	?	0	525	Calibration	-	996	9.9871	5741.86	0	?	0	525	Calibration	-	996	9.9858	5061.01	0	?
997	9.9963	10754.9	0	?	0	525	Calibration	-	997	9.9976	19900.6	0	?	0	525	Calibration	-	997	9.9958	7095.28	0	?	0	525	Calibration	-	997	9.9958	7090.15	0	?	0	525	Calibration	-	997	9.9971	5724.92	0	?	0	525	Calibration	-	997	9.9958	5055.88	0	?
998	10.0063	10753.9	0	?	0	525	Calibration	-	998	10.0076	19855.4	0	?	0	525	Calibration	-	998	10.0058	7097.95	0	?	0	525	Calibration	-	998	10.0058	7090.17	0	?	0	525	Calibration	-	998	10.0072	5731.27	0	?	0	525	Calibration	-	998	10.0058	5036.37	0	?
999	10.0163	10683.5	0	?	0	525	Calibration	-	999	10.0176	19855.5	0	?	0	525	Calibration	-	999	10.0159	7097.72	0	?	0	525	Calibration	-	999	10.0159	7082.44	0	?	0	525	Calibration	-	999	10.0172	5730.07	0	?	0	525	Calibration	-	999	10.0159	5045.53	0	?
1000	10.0263	10578.6	0	?	0	525	Calibration	-	1000	10.0276	19854.7	0	?	0	525	Calibration	-	1000	10.0259	7085.44	0	?	0	525	Calibration	-	1000	10.0259	7099.05	0	?	0	525	Calibration	-	1000	10.0272	5744.72	0	?	0	525	Calibration	-	1000	10.0259	5066.99	0	?
1001	10.0363	10539.1	0	?	0	525	Calibration	-	1001	10.0377	19893	0	?	0	525	Calibration	-	1001	10.0359	7099.83	0	?	0	525	Calibration	-	1001	10.0359	7103.43	0	?	0	525	Calibration	-	1001	10.0372	5751.42	0	?	0	525	Calibration	-	1001	10.0359	5077.11	0	?
1002	10.0463	10598.7	0	?	0	525	Calibration	-	1002	10.0477	19866.5	0	?	0	525	Calibration	-	1002	10.0459	7083.08	0	?	0	525	Calibration	-	1002	10.0459	7112.27	0	?	0	525	Calibration	-	1002	10.0472	5739.64	0	?	0	525	Calibration	-	1002	10.0459	5069.15	0	?
1003	10.0564	10655.5	0	?	0	525	Calibration	-	1003	10.0577	19869.3	0	?	0	525	Calibration	-	1003	10.0559	7086	0	?	0	525	Calibration	-	1003	10.0559	7129.42	0	?	0	525	Calibration	-	1003	10.0572	5735.82	0	?	0	525	Calibration	-	1003	10.0559	5052.7	0	?
1004	10.0664	10715.3	0	?	0	525	Calibration	-	1004	10.0677	19907.8	0	?	0	525	Calibration	-	1004	10.0659	7088.14	0	?	0	525	Calibration	-	1004	10.0659	7126.92	0	?	0	525	Calibration	-	1004	10.0673	5723.43	0	?	0	525	Calibration	-	1004	10.0659	5057.44	0	?
1005	10.0764	10766.8	0	?	0	525	Calibration	-	1005	10.0777	19984.3	0	?	0	525	Calibration	-	1005	10.076	7062.41	0	?	0	525	Calibration	-	1005	10.076	7142	0	?	0	525	Calibration	-	1005	10.0773	5739.61	0	?	0	525	Calibration	-	1005	10.076	5060.74	0	?
1006	10.0864	10905.1	0	?	0	525	Calibration	-	1006	10.0877	20056.1	0	?	0	525	Calibration	-	1006	10.086	7066.53	0	?	0	525	Calibration	-	1006	10.086	7147.72	0	?	0	525	Calibration	-	1006	10.0873	5740.26	0	?	0	525	Calibration	-	1006	10.086	5071.02	0	?
1007	10.0964	11035.1	0	?	0	525	Calibration	-	1007	10.0978	20090	0	?	0	525	Calibration	-	1007	10.096	7063.79	0	?	0	525	Calibration	-	1007	10.096	7131.78	0	?	0	525	Calibration	-	1007	10.0973	5734.01	0	?	0	525	Calibration	-	1007	10.096	5068.5	0	?
1008	10.1064	11109.1	0	?	0	525	Calibration	-	1008	10.1078	19973.8	0	?	0	525	Calibration	-	1008	10.106	7067.37	0	?	0	525	Calibration	-	1008	10.106	7100.6	0	?	0	525	Calibration	-	1008	10.1073	5720.03	0	?	0	525	Calibration	-	1008	10.106	5069.87	0	?
1009	10.1165	11199.5	0	?	0	525	Calibration	-	1009	10.1178	19941.2	0	?	0	525	Calibration	-	1009	10.116	7078.01	0	?	0	525	Calibration	-	1009	10.116	7102.31	0	?	0	525	Calibration	-	1009	10.1174	5715.05	0	?	0	525	Calibration	-	1009	10.116	5073.38	0	?
1010	10.1265	11188.1	0	?	0	525	Calibration	-	1010	10.1278	19952.1	0	?	0	525	Calibration	-	1010	10.126	7072.37	0	?	0	525	Calibration	-	1010	10.126	7079.03	0	?	0	525	Calibration	-	1010	10.1274	5725.86	0	?	0	525	Calibration	-	1010	10.126	5081.04	0	?
1011	10.1365	11114.3	0	?	0	525	Calibration	-	1011	10.1378	20303.1	0	?	0	525	Calibration	-	1011	10.136	7081.04	0	?	0	525	Calibration	-	1011	10.136	7066.49	0	?	0	525	Calibration	-	1011	10.1374	5729.82	0	?	0	525	Calibration	-	1011	10.136	5085.37	0	?
1012	10.1465	11012.2	0	?	0	525	Calibration	-	1012	10.1479	20582.3	0	?	0	525	Calibration	-	1012	10.1461	7087.42	0	?	0	525	Calibration	-	1012	10.1461	7097.46	0	?	0	525	Calibration	-	1012	10.1474	5694.81	0	?	0	525	Calibration	-	1012	10.1461	5069.17	0	?
1013	10.1565	11079.8	0	?	0	525	Calibration	-	1013	10.1579	20558.3	0	?	0	525	Calibration	-	1013	10.1561	7083.15	0	?	0	525	Calibration	-	1013	10.1561	7083.11	0	?	0	525	Calibration	-	1013	10.1574	5721.42	0	?	0	525	Calibration	-	1013	10.1561	5084.18	0	?
1014	10.1665	11315	0	?	0	525	Calibration	-	1014	10.1679	20446.6	0	?	0	525	Calibration	-	1014	10.1661	7077.71	0	?	0	525	Calibration	-	1014	10.1661	7086.54	0	?	0	525	Calibration	-	1014	10.1674	5746.86	0	?	0	525	Calibration	-	1014	10.1661	5069.86	0	?
1015	10.1766	11441.1	0	?	0	525	Calibration	-	1015	10.1779	20345.7	0	?	0	525	Calibration	-	1015	10.1761	7074.72	0	?	0	525	Calibration	-	1015	10.1761	7082.59	0	?	0	525	Calibration	-	1015	10.1775	5744.06	0	?	0	525	Calibration	-	1015	10.1761	5066.97	0	?
1016	10.1866	11409.9	0	?	0	525	Calibration	-	1016	10.1879	20182.5	0	?	0	525	Calibration	-	1016	10.1861	7083.29	0	?	0	525	Calibration	-	1016	10.1861	7078.11	0	?	0	525	Calibration	-	1016	10.1875	5741.29	0	?	0	525	Calibration	-	1016	10.1861	5074.5	0	?
1017	10.1966	11397.2	0	?	0	525	Calibration	-	1017	10.1979	20028.4	0	?	0	525	Calibration	-	1017	10.1961	7092.32	0	?	0	525	Calibration	-	1017	10.1961	7101.66	0	?	0	525	Calibration	-	1017	10.1975	5744.52	0	?	0	525	Calibration	-	1017	10.1961	5087.92	0	?
1018	10.2066	11215.1	0	?	0	525	Calibration	-	1018	10.208	20074.8	0	?	0	525	Calibration	-	1018	10.2062	7056.45	0	?	0	525	Calibration	-	1018	10.2062	7084.14	0	?	0	525	Calibration	-	1018	10.2075	5739.87	0	?	0	525	Calibration	-	1018	10.2062	5075.88	0	?
1019	10.2166	11093.1	0	?	0	525	Calibration	-	1019	10.218	20293.9	0	?	0	525	Calibration	-	1019	10.2162	7064.18	0	?	0	525	Calibration	-	1019	10.2162	7089.96	0	?	0	525	Calibration	-	1019	10.2175	5721.06	0	?	0	525	Calibration	-	1019	10.2162	5062.89	0	?
1020	10.2266	11013.9	0	?	0	525	Calibration	-	1020	10.228	20436.1	0	?	0	525	Calibration	-	1020	10.2262	7050.18	0	?	0	525	Calibration	-	1020	10.2262	7090.46	0	?	0	525	Calibration	-	1020	10.2275	5722.73	0	?	0	525	Calibration	-	1020	10.2262	5050.08	0	?
1021	10.2367	11007.8	0	?	0	525	Calibration	-	1021	10.238	20307.3	0	?	0	525	Calibration	-	1021	10.2362	7037.42	0	?	0	525	Calibration	-	1021	10.2362	7070.16	0	?	0	525	Calibration	-	1021	10.2376	5721.28	0	?	0	525	Calibration	-	1021	10.2362	5082.91	0	?
1022	10.2467	10900.4	0	?	0	525	Calibration	-	1022	10.248	20187.9	0	?	0	525	Calibration	-	1022	10.2462	7054.52	0	?	0	525	Calibration	-	1022	10.2462	7088.96	0	?	0	525	Calibration	-	1022	10.2476	5727.34	0	?	0	525	Calibration	-	1022	10.2462	5058.79	0	?
1023	10.2567	10883.6	0	?	0	525	Calibration	-	1023	10.258	20072.7	0	?	0	525	Calibration	-	1023	10.2562	7056.08	0	?	0	525	Calibration	-	1023	10.2562	7082.8	0	?	0	525	Calibration	-	1023	10.2576	5729.81	0	?	0	525	Calibration	-	1023	10.2562	5058.38	0	?
1024	10.2667	10904.7	0	?	0	525	Calibration	-	1024	10.2681	20017.7	0	?	0	525	Calibration	-	1024	10.2663	7063.37	0	?	0	525	Calibration	-	1024	10.2663	7071.55	0	?	0	525	Calibration	-	1024	10.2676	5738.29	0	?	0	525	Calibration	-	1024	10.2663	5064.08	0	?
1025	10.2767	10967.3	0	?	0	525	Calibration	-	1025	10.2781	20003.4	0	?	0	525	Calibration	-	1025	10.2763	7062.46	0	?	0	525	Calibration	-	1025	10.2763	7084.7	0	?	0	525	Calibration	-	1025	10.2776	5717.83	0	?	0	525	Calibration	-	1025	10.2763	5069.36	0	?
1026	10.2867	11026.2	0	?	0	525	Calibration	-	1026	10.2881	20012.5	0	?	0	525	Calibration	-	1026	10.2863	7060.04	0	?	0	525	Calibration	-	1026	10.2863	7085.94	0	?	0	525	Calibration	-	1026	10.2876	5722.62	0	?	0	525	Calibration	-	1026	10.2863	5071.25	0	?
1027	10.2968	11149.3	0	?	0	525	Calibration	-	1027	10.2981	20152.8	0	?	0	525	Calibration	-	1027	10.2963	7051.51	0	?	0	525	Calibration	-	1027	10.2963	7100.65	0	?	0	525	Calibration	-	1027	10.2977	5726.87	0	?	0	525	Calibration	-	1027	10.2963	5076.87	0	?
1028	10.3068	11203.3	0	?	0	525	Calibration	-	1028	10.3081	20247.3	0	?	0	525	Calibration	-	1028	10.3063	7074.82	0	?	0	525	Calibration	-	1028	10.3063	7103.9	0	?	0	525	Calibration	-	1028	10.3077	5740.59	0	?	0	525	Calibration	-	1028	10.3063	5057.27	0	?
1029	10.3168	11055.5	0	?	0	525	Calibration	-	1029	10.3181	20239.4	0	?	0	525	Calibration	-	1029	10.3163	7075.98	0	?	0	525	Calibration	-	1029	10.3163	7103.26	0	?	0	525	Calibration	-	1029	10.3177	5718.86	0	?	0	525	Calibration	-	1029	10.3163	5073.81	0	?
1030	10.3268	10918.8	0	?	0	525	Calibration	-	1030	10.3282	20216.3	0	?	0	525	Calibration	-	1030	10.3264	7066.52	0	?	0	525	Calibration	-	1030	10.3264	7098.48	0	?	0	525	Calibration	-	1030	10.3277	5735.22	0	?	0	525	Calibration	-	1030	10.3264	5061.25	0	?
1031	10.3368	10897.8	0	?	0	525	Calibration	-	1031	10.3382	20203.5	0	?	0	525	Calibration	-	1031	10.3364	7070.7	0	?	0	525	Calibration	-	1031	10.3364	7099.24	0	?	0	525	Calibration	-	1031	10.3377	5730.19	0	?	0	525	Calibration	-	1031	10.3364	5070.17	0	?
1032	10.3468	10827.5	0	?	0	525	Calibration	-	1032	10.3482	20144.9	0	?	0	525	Calibration	-	1032	10.3464	7059.35	0	?	0	525	Calibration	-	1032	10.3464	7085.99	0	?	0	525	Calibration	-	1032	10.3477	5737.72	0	?	0	525	Calibration	-	1032	10.3464	5087.62	0	?
1033	10.3569	10878.7	0	?	0	525	Calibration	-	1033	10.3582	20058.1	0	?	0	525	Calibration	-	1033	10.3564	7058.81	0	?	0	525	Calibration	-	1033	10.3564	7097.82	0	?	0	525	Calibration	-	1033	10.3578	5745.61	0	?	0	525	Calibration	-	1033	10.3564	5069.55	0	?
1034	10.3669	11024.4	0	?	0	525	Calibration	-	1034	10.3682	19957.8	0	?	0	525	Calibration	-	1034	10.3664	7057.25	0	?	0	525	Calibration	-	1034	10.3664	7088.1	0	?	0	525	Calibration	-	1034	10.3678	5761.45	0	?	0	525	Calibration	-	1034	10.3664	5066.41	0	?
1035	10.3769	11096.4	0	?	0	525	Calibration	-	1035	10.3783	19853.4	0	?	0	525	Calibration	-	1035	10.3764	7058.9	0	?	0	525	Calibration	-	1035	10.3764	7077.82	0	?	0	525	Calibration	-	1035	10.3778	5751.41	0	?	0	525	Calibration	-	1035	10.3764	5064.23	0	?
1036	10.3869	10992.4	0	?	0	525	Calibration	-	1036	10.3883	19776.3	0	?	0	525	Calibration	-	1036	10.3864	7061.62	0	?	0	525	Calibration	-	1036	10.3864	7076.65	0	?	0	525	Calibration	-	1036	10.3878	5757.98	0	?	0	525	Calibration	-	1036	10.3864	5062.23	0	?
1037	10.3969	10934.7	0	?	0	525	Calibration	-	1037	10.3983	19893.9	0	?	0	525	Calibration	-	1037	10.3965	7060.28	0	?	0	525	Calibration	-	1037	10.3965	7080.5	0	?	0	525	Calibration	-	1037	10.3978	5721.79	0	?	0	525	Calibration	-	1037	10.3965	5064.18	0	?
1038	10.4069	10882.5	0	?	0	525	Calibration	-	1038	10.4083	19988.9	0	?	0	525	Calibration	-	1038	10.4065	7071.48	0	?	0	525	Calibration	-	1038	10.4065	7080.34	0	?	0	525	Calibration	-	1038	10.4079	5720.89	0	?	0	525	Calibration	-	1038	10.4065	5055.1	0	?
1039	10.417	10819.5	0	?	0	525	Calibration	-	1039	10.4183	20043.2	0	?	0	525	Calibration	-	1039	10.4165	7074.92	0	?	0	525	Calibration	-	1039	10.4165	7075.74	0	?	0	525	Calibration	-	1039	10.4179	5729.63	0	?	0	525	Calibration	-	1039	10.4165	5065.31	0	?
1040	10.427	10903	0	?	0	525	Calibration	-	1040	10.4283	20117.3	0	?	0	525	Calibration	-	1040	10.4265	7060.46	0	?	0	525	Calibration	-	1040	10.4265	7058.55	0	?	0	525	Calibration	-	1040	10.4279	5726.59	0	?	0	525	Calibration	-	1040	10.4265	5057.48	0	?
1041	10.437	10938.1	0	?	0	525	Calibration	-	1041	10.4384	20057.7	0	?	0	525	Calibration	-	1041	10.4365	7051.62	0	?	0	525	Calibration	-	1041	10.4365	7061.01	0	?	0	525	Calibration	-	1041	10.4379	5716.15	0	?	0	525	Calibration	-	1041	10.4365	5058.49	0	?
1042	10.447	10989.9	0	?	0	525	Calibration	-	1042	10.4484	20068.4	0	?	0	525	Calibration	-	1042	10.4465	7063.94	0	?	0	525	Calibration	-	1042	10.4465	7061.88	0	?	0	525	Calibration	-	1042	10.4479	5695.03	0	?	0	525	Calibration	-	1042	10.4465	5077.74	0	?
1043	10.457	10935.7	0	?	0	525	Calibration	-	1043	10.4584	20194.5	0	?	0	525	Calibration	-	1043	10.4566	7057.93	0	?	0	525	Calibration	-	1043	10.4566	7060.14	0	?	0	525	Calibration	-	1043	10.4579	5715.36	0	?	0	525	Calibration	-	1043	10.4566	5069.13	0	?
1044	10.467	10853.1	0	?	0	525	Calibration	-	1044	10.4684	20353.6	0	?	0	525	Calibration	-	1044	10.4666	7065.93	0	?	0	525	Calibration	-	1044	10.4666	7074.69	0	?	0	525	Calibration	-	1044	10.468	5717.39	0	?	0	525	Calibration	-	1044	10.4666	5064.95	0	?
1045	10.477	10838.2	0	?	0	525	Calibration	-	1045	10.4784	20438.8	0	?	0	525	Calibration	-	1045	10.4766	7066.26	0	?	0	525	Calibration	-	1045	10.4766	7066.78	0	?	0	525	Calibration	-	1045	10.478	5720.85	0	?	0	525	Calibration	-	1045	10.4766	5076.63	0	?
1046	10.4871	10794.7	0	?	0	525	Calibration	-	1046	10.4884	20267.1	0	?	0	525	Calibration	-	1046	10.4866	7062.61	0	?	0	525	Calibration	-	1046	10.4866	7061.82	0	?	0	525	Calibration	-	1046	10.488	5725.57	0	?	0	525	Calibration	-	1046	10.4866	5070.82	0	?
1047	10.4971	10802.8	0	?	0	525	Calibration	-	1047	10.4985	20088.8	0	?	0	525	Calibration	-	1047	10.4966	7068.32	0	?	0	525	Calibration	-	1047	10.4966	7052.83	0	?	0	525	Calibration	-	1047	10.498	5725.19	0	?	0	525	Calibration	-	1047	10.4966	5075.81	0	?
1048	10.5071	10866.8	0	?	0	525	Calibration	-	1048	10.5085	19993.8	0	?	0	525	Calibration	-	1048	10.5066	7078.04	0	?	0	525	Calibration	-	1048	10.5066	7060.5	0	?	0	525	Calibration	-	1048	10.508	5704.9	0	?	0	525	Calibration	-	1048	10.5066	5073.34	0	?
1049	10.5171	10888.3	0	?	0	525	Calibration	-	1049	10.5185	20037.4	0	?	0	525	Calibration	-	1049	10.5167	7062.76	0	?	0	525	Calibration	-	1049	10.5167	7098.64	0	?	0	525	Calibration	-	1049	10.518	5724.03	0	?	0	525	Calibration	-	1049	10.5167	5058.37	0	?
1050	10.5271	10870.2	0	?	0	525	Calibration	-	1050	10.5285	20015.6	0	?	0	525	Calibration	-	1050	10.5267	7064.15	0	?	0	525	Calibration	-	1050	10.5267	7106.98	0	?	0	525	Calibration	-	1050	10.5281	5720.2	0	?	0	525	Calibration	-	1050	10.5267	5072.42	0	?
1051	10.5371	10839.3	0	?	0	525	Calibration	-	1051	10.5385	20024.9	0	?	0	525	Calibration	-	1051	10.5367	7068.56	0	?	0	525	Calibration	-	1051	10.5367	7111.08	0	?	0	525	Calibration	-	1051	10.5381	5701.32	0	?	0	525	Calibration	-	1051	10.5367	5055.19	0	?
1052	10.5472	10750.5	0	?	0	525	Calibration	-	1052	10.5486	19984.4	0	?	0	525	Calibration	-	1052	10.5467	7083.38	0	?	0	525	Calibration	-	1052	10.5467	7101.56	0	?	0	525	Calibration	-	1052	10.5481	5718.75	0	?	0	525	Calibration	-	1052	10.5467	5070.21	0	?
1053	10.5572	10659.5	0	?	0	525	Calibration	-	1053	10.5586	19897.8	0	?	0	525	Calibration	-	1053	10.5567	7052.56	0	?	0	525	Calibration	-	1053	10.5567	7110.95	0	?	0	525	Calibration	-	1053	10.5581	5734.83	0	?	0	525	Calibration	-	1053	10.5567	5062.59	0	?
1054	10.5672	10683.7	0	?	0	525	Calibration	-	1054	10.5686	19972.9	0	?	0	525	Calibration	-	1054	10.5667	7054.59	0	?	0	525	Calibration	-	1054	10.5667	7101.78	0	?	0	525	Calibration	-	1054	10.5681	5733.44	0	?	0	525	Calibration	-	1054	10.5667	5057.42	0	?
1055	10.5772	10571.8	0	?	0	525	Calibration	-	1055	10.5786	20123	0	?	0	525	Calibration	-	1055	10.5767	7060.67	0	?	0	525	Calibration	-	1055	10.5767	7095.77	0	?	0	525	Calibration	-	1055	10.5781	5721.31	0	?	0	525	Calibration	-	1055	10.5767	5053.87	0	?
1056	10.5872	10504.2	0	?	0	525	Calibration	-	1056	10.5886	20234.3	0	?	0	525	Calibration	-	1056	10.5868	7081.15	0	?	0	525	Calibration	-	1056	10.5868	7079.96	0	?	0	525	Calibration	-	1056	10.5882	5715.18	0	?	0	525	Calibration	-	1056	10.5868	5080.33	0	?
1057	10.5972	10540.8	0	?	0	525	Calibration	-	1057	10.5986	20145.5	0	?	0	525	Calibration	-	1057	10.5968	7073.97	0	?	0	525	Calibration	-	1057	10.5968	7072.41	0	?	0	525	Calibration	-	1057	10.5982	5713.73	0	?	0	525	Calibration	-	1057	10.5968	5056.92	0	?
1058	10.6073	10497.7	0	?	0	525	Calibration	-	1058	10.6087	20042.8	0	?	0	525	Calibration	-	1058	10.6068	7050.59	0	?	0	525	Calibration	-	1058	10.6068	7067.33	0	?	0	525	Calibration	-	1058	10.6082	5714.23	0	?	0	525	Calibration	-	1058	10.6068	5070.99	0	?
1059	10.6173	10515	0	?	0	525	Calibration	-	1059	10.6187	19888.3	0	?	0	525	Calibration	-	1059	10.6168	7071.96	0	?	0	525	Calibration	-	1059	10.6168	7066.06	0	?	0	525	Calibration	-	1059	10.6182	5721.02	0	?	0	525	Calibration	-	1059	10.6168	5064.41	0	?
1060	10.6273	10508.3	0	?	0	525	Calibration	-	1060	10.6287	19895.9	0	?	0	525	Calibration	-	1060	10.6268	7066.4	0	?	0	525	Calibration	-	1060	10.6268	7093.3	0	?	0	525	Calibration	-	1060	10.6282	5694.34	0	?	0	525	Calibration	-	1060	10.6268	5065.87	0	?
1061	10.6373	10504.3	0	?	0	525	Calibration	-	1061	10.6387	19877.2	0	?	0	525	Calibration	-	1061	10.6368	7071.56	0	?	0	525	Calibration	-	1061	10.6368	7084.3	0	?	0	525	Calibration	-	1061	10.6382	5716.51	0	?	0	525	Calibration	-	1061	10.6368	5052.62	0	?
1062	10.6473	10525.9	0	?	0	525	Calibration	-	1062	10.6487	19938.9	0	?	0	525	Calibration	-	1062	10.6469	7073.35	0	?	0	525	Calibration	-	1062	10.6469	7073.23	0	?	0	525	Calibration	-	1062	10.6483	5714.32	0	?	0	525	Calibration	-	1062	10.6469	5074.47	0	?
1063	10.6573	10563.2	0	?	0	525	Calibration	-	1063	10.6587	19902.2	0	?	0	525	Calibration	-	1063	10.6569	7065.98	0	?	0	525	Calibration	-	1063	10.6569	7066.5	0	?	0	525	Calibration	-	1063	10.6583	5699.55	0	?	0	525	Calibration	-	1063	10.6569	5047.06	0	?
1064	10.6674	10612.5	0	?	0	525	Calibration	-	1064	10.6688	19845.6	0	?	0	525	Calibration	-	1064	10.6669	7060.35	0	?	0	525	Calibration	-	1064	10.6669	7062	0	?	0	525	Calibration	-	1064	10.6683	5738.17	0	?	0	525	Calibration	-	1064	10.6669	5052.87	0	?
1065	10.6774	10766.1	0	?	0	525	Calibration	-	1065	10.6788	19855.3	0	?	0	525	Calibration	-	1065	10.6769	7060.2	0	?	0	525	Calibration	-	1065	10.6769	7063.35	0	?	0	525	Calibration	-	1065	10.6783	5717.84	0	?	0	525	Calibration	-	1065	10.6769	5055.79	0	?
1066	10.6874	10867.5	0	?	0	525	Calibration	-	1066	10.6888	19895.2	0	?	0	525	Calibration	-	1066	10.6869	7059.01	0	?	0	525	Calibration	-	1066	10.6869	7060.99	0	?	0	525	Calibration	-	1066	10.6883	5719.24	0	?	0	525	Calibration	-	1066	10.6869	5046.46	0	?
1067	10.6974	10891.3	0	?	0	525	Calibration	-	1067	10.6988	20023.2	0	?	0	525	Calibration	-	1067	10.6969	7059.28	0	?	0	525	Calibration	-	1067	10.6969	7025.92	0	?	0	525	Calibration	-	1067	10.6983	5716.03	0	?	0	525	Calibration	-	1067	10.6969	5054.68	0	?
1068	10.7074	10848	0	?	0	525	Calibration	-	1068	10.7088	20114.4	0	?	0	525	Calibration	-	1068	10.707	7057.35	0	?	0	525	Calibration	-	1068	10.707	7030.3	0	?	0	525	Calibration	-	1068	10.7084	5716.5	0	?	0	525	Calibration	-	1068	10.707	5043.06	0	?
1069	10.7174	10924.3	0	?	0	525	Calibration	-	1069	10.7189	20157.5	0	?	0	525	Calibration	-	1069	10.717	7043.11	0	?	0	525	Calibration	-	1069	10.717	7039.61	0	?	0	525	Calibration	-	1069	10.7184	5706.81	0	?	0	525	Calibration	-	1069	10.717	5062.8	0	?
1070	10.7275	10941.9	0	?	0	525	Calibration	-	1070	10.7289	20100.2	0	?	0	525	Calibration	-	1070	10.727	7062.81	0	?	0	525	Calibration	-	1070	10.727	7044.47	0	?	0	525	Calibration	-	1070	10.7284	5723.42	0	?	0	525	Calibration	-	1070	10.727	5066.44	0	?
1071	10.7375	11019.1	0	?	0	525	Calibration	-	1071	10.7389	19886.2	0	?	0	525	Calibration	-	1071	10.737	7068.25	0	?	0	525	Calibration	-	1071	10.737	7057.54	0	?	0	525	Calibration	-	1071	10.7384	5705.87	0	?	0	525	Calibration	-	1071	10.737	5060.4	0	?
1072	10.7475	11180.8	0	?	0	525	Calibration	-	1072	10.7489	19922.2	0	?	0	525	Calibration	-	1072	10.747	7064.28	0	?	0	525	Calibration	-	1072	10.747	7058.85	0	?	0	525	Calibration	-	1072	10.7484	5717.43	0	?	0	525	Calibration	-	1072	10.747	5065.04	0	?
1073	10.7575	11213	0	?	0	525	Calibration	-	1073	10.7589	19909.9	0	?	0	525	Calibration	-	1073	10.757	7047.43	0	?	0	525	Calibration	-	1073	10.757	7069.24	0	?	0	525	Calibration	-	1073	10.7585	5704.1	0	?	0	525	Calibration	-	1073	10.757	5066.08	0	?
1074	10.7675	11322.5	0	?	0	525	Calibration	-	1074	10.7689	19929.5	0	?	0	525	Calibration	-	1074	10.767	7055.25	0	?	0	525	Calibration	-	1074	10.767	7059.73	0	?	0	525	Calibration	-	1074	10.7685	5709.77	0	?	0	525	Calibration	-	1074	10.767	5052.98	0	?
1075	10.7775	11226.7	0	?	0	525	Calibration	-	1075	10.779	19770.2	0	?	0	525	Calibration	-	1075	10.7771	7040.76	0	?	0	525	Calibration	-	1075	10.7771	7051.48	0	?	0	525	Calibration	-	1075	10.7785	5700.32	0	?	0	525	Calibration	-	1075	10.7771	5049.21	0	?
1076	10.7876	11105.9	0	?	0	525	Calibration	-	1076	10.789	19696.6	0	?	0	525	Calibration	-	1076	10.7871	7026.02	0	?	0	525	Calibration	-	1076	10.7871	7047.4	0	?	0	525	Calibration	-	1076	10.7885	5716.51	0	?	0	525	Calibration	-	1076	10.7871	5074.57	0	?
1077	10.7976	11045.9	0	?	0	525	Calibration	-	1077	10.799	19598.3	0	?	0	525	Calibration	-	1077	10.7971	7041	0	?	0	525	Calibration	-	1077	10.7971	7026.98	0	?	0	525	Calibration	-	1077	10.7985	5710.96	0	?	0	525	Calibration	-	1077	10.7971	5069.32	0	?
1078	10.8076	11009.2	0	?	0	525	Calibration	-	1078	10.809	19610.8	0	?	0	525	Calibration	-	1078	10.8071	7046.89	0	?	0	525	Calibration	-	1078	10.8071	7015.45	0	?	0	525	Calibration	-	1078	10.8085	5724.37	0	?	0	525	Calibration	-	1078	10.8071	5053.61	0	?
1079	10.8176	11121.2	0	?	0	525	Calibration	-	1079	10.819	19616.9	0	?	0	525	Calibration	-	1079	10.8171	7048.53	0	?	0	525	Calibration	-	1079	10.8171	7022.05	0	?	0	525	Calibration	-	1079	10.8186	5718.14	0	?	0	525	Calibration	-	1079	10.8171	5073.88	0	?
1080	10.8276	11106	0	?	0	525	Calibration	-	1080	10.829	19643.5	0	?	0	525	Calibration	-	1080	10.8271	7040.11	0	?	0	525	Calibration	-	1080	10.8271	7035.2	0	?	0	525	Calibration	-	1080	10.8286	5710.57	0	?	0	525	Calibration	-	1080	10.8271	5067.78	0	?
1081	10.8376	10917	0	?	0	525	Calibration	-	1081	10.8391	19700.2	0	?	0	525	Calibration	-	1081	10.8372	7057.88	0	?	0	525	Calibration	-	1081	10.8372	7059.23	0	?	0	525	Calibration	-	1081	10.8386	5730.13	0	?	0	525	Calibration	-	1081	10.8372	5078.04	0	?
1082	10.8477	10822.8	0	?	0	525	Calibration	-	1082	10.8491	19725.7	0	?	0	525	Calibration	-	1082	10.8472	7048.59	0	?	0	525	Calibration	-	1082	10.8472	7075.05	0	?	0	525	Calibration	-	1082	10.8486	5715.61	0	?	0	525	Calibration	-	1082	10.8472	5061.11	0	?
1083	10.8577	10775.5	0	?	0	525	Calibration	-	1083	10.8591	19760.4	0	?	0	525	Calibration	-	1083	10.8572	7028.73	0	?	0	525	Calibration	-	1083	10.8572	7063.16	0	?	0	525	Calibration	-	1083	10.8586	5717.69	0	?	0	525	Calibration	-	1083	10.8572	5071.89	0	?
1084	10.8677	10747.4	0	?	0	525	Calibration	-	1084	10.8691	19789.3	0	?	0	525	Calibration	-	1084	10.8672	7049.26	0	?	0	525	Calibration	-	1084	10.8672	7057.27	0	?	0	525	Calibration	-	1084	10.8686	5719.11	0	?	0	525	Calibration	-	1084	10.8672	5068.69	0	?
1085	10.8777	10755.7	0	?	0	525	Calibration	-	1085	10.8791	19788.2	0	?	0	525	Calibration	-	1085	10.8772	7047.52	0	?	0	525	Calibration	-	1085	10.8772	7054.03	0	?	0	525	Calibration	-	1085	10.8787	5731.74	0	?	0	525	Calibration	-	1085	10.8772	5073.74	0	?
1086	10.8877	10760.6	0	?	0	525	Calibration	-	1086	10.8892	19810.9	0	?	0	525	Calibration	-	1086	10.8872	7062.57	0	?	0	525	Calibration	-	1086	10.8872	7081.62	0	?	0	525	Calibration	-	1086	10.8887	5725.38	0	?	0	525	Calibration	-	1086	10.8872	5064.26	0	?
1087	10.8977	10779.4	0	?	0	525	Calibration	-	1087	10.8992	19720.3	0	?	0	525	Calibration	-	1087	10.8973	7058.2	0	?	0	525	Calibration	-	1087	10.8973	7078.03	0	?	0	525	Calibration	-	1087	10.8987	5717.7	0	?	0	525	Calibration	-	1087	10.8973	5057.97	0	?
1088	10.9078	10878.5	0	?	0	525	Calibration	-	1088	10.9092	19716.5	0	?	0	525	Calibration	-	1088	10.9073	7073.51	0	?	0	525	Calibration	-	1088	10.9073	7053.67	0	?	0	525	Calibration	-	1088	10.9087	5696.34	0	?	0	525	Calibration	-	1088	10.9073	5068.19	0	?
1089	10.9178	10966.8	0	?	0	525	Calibration	-	1089	10.9192	19832.9	0	?	0	525	Calibration	-	1089	10.9173	7051.63	0	?	0	525	Calibration	-	1089	10.9173	7052.29	0	?	0	525	Calibration	-	1089	10.9187	5701.81	0	?	0	525	Calibration	-	1089	10.9173	5078.19	0	?
1090	10.9278	11026.2	0	?	0	525	Calibration	-	1090	10.9292	19869	0	?	0	525	Calibration	-	1090	10.9273	7061.2	0	?	0	525	Calibration	-	1090	10.9273	7052.1	0	?	0	525	Calibration	-	1090	10.9287	5729.14	0	?	0	525	Calibration	-	1090	10.9273	5072.44	0	?
1091	10.9378	10921.6	0	?	0	525	Calibration	-	1091	10.9392	19829.6	0	?	0	525	Calibration	-	1091	10.9373	7057.69	0	?	0	525	Calibration	-	1091	10.9373	7065.93	0	?	0	525	Calibration	-	1091	10.9388	5708.17	0	?	0	525	Calibration	-	1091	10.9373	5060.32	0	?
1092	10.9478	10978.9	0	?	0	525	Calibration	-	1092	10.9493	19827.3	0	?	0	525	Calibration	-	1092	10.9473	7048.25	0	?	0	525	Calibration	-	1092	10.9473	7060.3	0	?	0	525	Calibration	-	1092	10.9488	5710.95	0	?	0	525	Calibration	-	1092	10.9473	5060.96	0	?
1093	10.9578	10928.6	0	?	0	525	Calibration	-	1093	10.9593	19809.7	0	?	0	525	Calibration	-	1093	10.9573	7043.81	0	?	0	525	Calibration	-	1093	10.9573	7052.67	0	?	0	525	Calibration	-	1093	10.9588	5718.21	0	?	0	525	Calibration	-	1093	10.9573	5066.94	0	?
1094	10.9678	10840.1	0	?	0	525	Calibration	-	1094	10.9693	19917.6	0	?	0	525	Calibration	-	1094	10.9674	7052.92	0	?	0	525	Calibration	-	1094	10.9674	7051.67	0	?	0	525	Calibration	-	1094	10.9688	5688.56	0	?	0	525	Calibration	-	1094	10.9674	5067.39	0	?
1095	10.9779	10748.3	0	?	0	525	Calibration	-	1095	10.9793	19893.5	0	?	0	525	Calibration	-	1095	10.9774	7044.7	0	?	0	525	Calibration	-	1095	10.9774	7058.53	0	?	0	525	Calibration	-	1095	10.9788	5704.49	0	?	0	525	Calibration	-	1095	10.9774	5068.18	0	?
1096	10.9879	10738.4	0	?	0	525	Calibration	-	1096	10.9893	19885.3	0	?	0	525	Calibration	-	1096	10.9874	7048.47	0	?	0	525	Calibration	-	1096	10.9874	7075.25	0	?	0	525	Calibration	-	1096	10.9888	5694.33	0	?	0	525	Calibration	-	1096	10.9874	5051.74	0	?
1097	10.9979	10714.5	0	?	0	525	Calibration	-	1097	10.9993	19986.3	0	?	0	525	Calibration	-	1097	10.9974	7034.77	0	?	0	525	Calibration	-	1097	10.9974	7072.58	0	?	0	525	Calibration	-	1097	10.9989	5727.47	0	?	0	525	Calibration	-	1097	10.9974	5070.37	0	?
1098	11.0079	10798.3	0	?	0	525	Calibration	-	1098	11.0094	20096.5	0	?	0	525	Calibration	-	1098	11.0074	7051.17	0	?	0	525	Calibration	-	1098	11.0074	7070.9	0	?	0	525	Calibration	-	1098	11.0089	5733.92	0	?	0	525	Calibration	-	1098	11.0074	5066.01	0	?
1099	11.0179	10818.5	0	?	0	525	Calibration	-	1099	11.0194	20041.6	0	?	0	525	Calibration	-	1099	11.0174	7047.18	0	?	0	525	Calibration	-	1099	11.0174	7082.89	0	?	0	525	Calibration	-	1099	11.0189	5707.47	0	?	0	525	Calibration	-	1099	11.0174	5055.99	0	?
1100	11.0279	10832.1	0	?	0	525	Calibration	-	1100	11.0294	19992.5	0	?	0	525	Calibration	-	1100	11.0275	7060.53	0	?	0	525	Calibration	-	1100	11.0275	7077.22	0	?	0	525	Calibration	-	1100	11.0289	5703.84	0	?	0	525	Calibration	-	1100	11.0275	5049.34	0	?
1101	11.038	10783.3	0	?	0	525	Calibration	-	1101	11.0394	19940.1	0	?	0	525	Calibration	-	1101	11.0375	7050.92	0	?	0	525	Calibration	-	1101	11.0375	7044.56	0	?	0	525	Calibration	-	1101	11.0389	5710.41	0	?	0	525	Calibration	-	1101	11.0375	5071.11	0	?
1102	11.048	10798	0	?	0	525	Calibration	-	1102	11.0494	19908.1	0	?	0	525	Calibration	-	1102	11.0475	7052.3	0	?	0	525	Calibration	-	1102	11.0475	7046.94	0	?	0	525	Calibration	-	1102	11.049	5715.63	0	?	0	525	Calibration	-	1102	11.0475	5054.79	0	?
1103	11.058	10726.6	0	?	0	525	Calibration	-	1103	11.0595	19817.3	0	?	0	525	Calibration	-	1103	11.0575	7053.65	0	?	0	525	Calibration	-	1103	11.0575	7049.19	0	?	0	525	Calibration	-	1103	11.059	5727.24	0	?	0	525	Calibration	-	1103	11.0575	5071.55	0	?
1104	11.068	10654.6	0	?	0	525	Calibration	-	1104	11.0695	19791	0	?	0	525	Calibration	-	1104	11.0675	7035.28	0	?	0	525	Calibration	-	1104	11.0675	7040.07	0	?	0	525	Calibration	-	1104	11.069	5722.93	0	?	0	525	Calibration	-	1104	11.0675	5052.9	0	?
1105	11.078	10628.8	0	?	0	525	Calibration	-	1105	11.0795	19773.6	0	?	0	525	Calibration	-	1105	11.0775	7053.62	0	?	0	525	Calibration	-	1105	11.0775	7049.28	0	?	0	525	Calibration	-	1105	11.079	5716.36	0	?	0	525	Calibration	-	1105	11.0775	5071.54	0	?
1106	11.088	10577.3	0	?	0	525	Calibration	-	1106	11.0895	19770.4	0	?	0	525	Calibration	-	1106	11.0876	7039.71	0	?	0	525	Calibration	-	1106	11.0876	7037.9	0	?	0	525	Calibration	-	1106	11.089	5707.01	0	?	0	525	Calibration	-	1106	11.0876	5067.2	0	?
1107	11.0981	10551.8	0	?	0	525	Calibration	-	1107	11.0995	19747.5	0	?	0	525	Calibration	-	1107	11.0976	7032.56	0	?	0	525	Calibration	-	1107	11.0976	7018.74	0	?	0	525	Calibration	-	1107	11.099	5696.15	0	?	0	525	Calibration	-	1107	11.0976	5067.55	0	?
1108	11.1081	10605.2	0	?	0	525	Calibration	-	1108	11.1095	19696.2	0	?	0	525	Calibration	-	1108	11.1076	7036.38	0	?	0	525	Calibration	-	1108	11.1076	7028.49	0	?	0	525	Calibration	-	1108	11.1091	5704.09	0	?	0	525	Calibration	-	1108	11.1076	5073.44	0	?
1109	11.1181	10712.8	0	?	0	525	Calibration	-	1109	11.1196	19663.7	0	?	0	525	Calibration	-	1109	11.1176	7036.5	0	?	0	525	Calibration	-	1109	11.1176	7015.73	0	?	0	525	Calibration	-	1109	11.1191	5695.66	0	?	0	525	Calibration	-	1109	11.1176	5063.71	0	?
1110	11.1281	10821.3	0	?	0	525	Calibration	-	1110	11.1296	19617.1	0	?	0	525	Calibration	-	1110	11.1276	7051.54	0	?	0	525	Calibration	-	1110	11.1276	7014.93	0	?	0	525	Calibration	-	1110	11.1291	5703.3	0	?	0	525	Calibration	-	1110	11.1276	5077.68	0	?
1111	11.1381	10791	0	?	0	525	Calibration	-	1111	11.1396	19542.9	0	?	0	525	Calibration	-	1111	11.1376	7042.93	0	?	0	525	Calibration	-	1111	11.1376	7029.49	0	?	0	525	Calibration	-	1111	11.1391	5699.57	0	?	0	525	Calibration	-	1111	11.1376	5054.97	0	?
1112	11.1481	10706.7	0	?	0	525	Calibration	-	1112	11.1496	19534.4	0	?	0	525	Calibration	-	1112	11.1477	7042.06	0	?	0	525	Calibration	-	1112	11.1477	7024.39	0	?	0	525	Calibration	-	1112	11.1491	5704.53	0	?	0	525	Calibration	-	1112	11.1477	5067.63	0	?
1113	11.1582	10729.7	0	?	0	525	Calibration	-	1113	11.1596	19651.7	0	?	0	525	Calibration	-	1113	11.1577	7038.48	0	?	0	525	Calibration	-	1113	11.1577	7051.6	0	?	0	525	Calibration	-	1113	11.1591	5720.56	0	?	0	525	Calibration	-	1113	11.1577	5065.88	0	?
1114	11.1682	10718.8	0	?	0	525	Calibration	-	1114	11.1696	19656.9	0	?	0	525	Calibration	-	1114	11.1677	7052.46	0	?	0	525	Calibration	-	1114	11.1677	7056.93	0	?	0	525	Calibration	-	1114	11.1692	5690.13	0	?	0	525	Calibration	-	1114	11.1677	5052.98	0	?
1115	11.1782	10769.2	0	?	0	525	Calibration	-	1115	11.1797	19612.8	0	?	0	525	Calibration	-	1115	11.1777	7033.01	0	?	0	525	Calibration	-	1115	11.1777	7061.34	0	?	0	525	Calibration	-	1115	11.1792	5693.66	0	?	0	525	Calibration	-	1115	11.1777	5079.05	0	?
1116	11.1882	10862.2	0	?	0	525	Calibration	-	1116	11.1897	19611.5	0	?	0	525	Calibration	-	1116	11.1877	7053.13	0	?	0	525	Calibration	-	1116	11.1877	7043.33	0	?	0	525	Calibration	-	1116	11.1892	5701.19	0	?	0	525	Calibration	-	1116	11.1877	5057.94	0	?
1117	11.1982	10885.6	0	?	0	525	Calibration	-	1117	11.1997	19618.3	0	?	0	525	Calibration	-	1117	11.1977	7027.81	0	?	0	525	Calibration	-	1117	11.1977	7037.59	0	?	0	525	Calibration	-	1117	11.1992	5724.81	0	?	0	525	Calibration	-	1117	11.1977	5052.36	0	?
1118	11.2082	10775.3	0	?	0	525	Calibration	-	1118	11.2097	19607.6	0	?	0	525	Calibration	-	1118	11.2077	7054.76	0	?	0	525	Calibration	-	1118	11.2077	7042.64	0	?	0	525	Calibration	-	1118	11.2092	5715.66	0	?	0	525	Calibration	-	1118	11.2077	5058.28	0	?
1119	11.2183	10764.8	0	?	0	525	Calibration	-	1119	11.2197	19588.7	0	?	0	525	Calibration	-	1119	11.2178	7043.66	0	?	0	525	Calibration	-	1119	11.2178	7017.42	0	?	0	525	Calibration	-	1119	11.2192	5687.56	0	?	0	525	Calibration	-	1119	11.2178	5057.14	0	?
1120	11.2283	10820.6	0	?	0	525	Calibration	-	1120	11.2298	19588.1	0	?	0	525	Calibration	-	1120	11.2278	7045.68	0	?	0	525	Calibration	-	1120	11.2278	7039.25	0	?	0	525	Calibration	-	1120	11.2293	5688.97	0	?	0	525	Calibration	-	1120	11.2278	5080.8	0	?
1121	11.2383	10977.8	0	?	0	525	Calibration	-	1121	11.2398	19652.9	0	?	0	525	Calibration	-	1121	11.2378	7043.32	0	?	0	525	Calibration	-	1121	11.2378	7037.78	0	?	0	525	Calibration	-	1121	11.2393	5706.6	0	?	0	525	Calibration	-	1121	11.2378	5073.07	0	?
1122	11.2483	11085.6	0	?	0	525	Calibration	-	1122	11.2498	19668.8	0	?	0	525	Calibration	-	1122	11.2478	7038.37	0	?	0	525	Calibration	-	1122	11.2478	7043.64	0	?	0	525	Calibration	-	1122	11.2493	5682.73	0	?	0	525	Calibration	-	1122	11.2478	5064.9	0	?
1123	11.2583	11009.6	0	?	0	525	Calibration	-	1123	11.2598	19775.9	0	?	0	525	Calibration	-	1123	11.2578	7045.47	0	?	0	525	Calibration	-	1123	11.2578	7062.82	0	?	0	525	Calibration	-	1123	11.2593	5691.88	0	?	0	525	Calibration	-	1123	11.2578	5054.13	0	?
1124	11.2683	10898	0	?	0	525	Calibration	-	1124	11.2698	19740.1	0	?	0	525	Calibration	-	1124	11.2678	7046.7	0	?	0	525	Calibration	-	1124	11.2678	7075.24	0	?	0	525	Calibration	-	1124	11.2693	5676.28	0	?	0	525	Calibration	-	1124	11.2678	5070.72	0	?
1125	11.2784	10983.1	0	?	0	525	Calibration	-	1125	11.2798	19663.9	0	?	0	525	Calibration	-	1125	11.2779	7037.37	0	?	0	525	Calibration	-	1125	11.2779	7061.22	0	?	0	525	Calibration	-	1125	11.2793	5685.06	0	?	0	525	Calibration	-	1125	11.2779	5047.96	0	?
1126	11.2884	10893.7	0	?	0	525	Calibration	-	1126	11.2899	19642.9	0	?	0	525	Calibration	-	1126	11.2879	7034.42	0	?	0	525	Calibration	-	1126	11.2879	7060.33	0	?	0	525	Calibration	-	1126	11.2894	5694.38	0	?	0	525	Calibration	-	1126	11.2879	5056.76	0	?
1127	11.2984	10885.1	0	?	0	525	Calibration	-	1127	11.2999	19662	0	?	0	525	Calibration	-	1127	11.2979	7049.53	0	?	0	525	Calibration	-	1127	11.2979	7054.14	0	?	0	525	Calibration	-	1127	11.2994	5702.8	0	?	0	525	Calibration	-	1127	11.2979	5064.14	0	?
1128	11.3084	10936.2	0	?	0	525	Calibration	-	1128	11.3099	19621.1	0	?	0	525	Calibration	-	1128	11.3079	7042.46	0	?	0	525	Calibration	-	1128	11.3079	7057.17	0	?	0	525	Calibration	-	1128	11.3094	5699.64	0	?	0	525	Calibration	-	1128	11.3079	5059.69	0	?
1129	11.3184	10882.8	0	?	0	525	Calibration	-	1129	11.3199	19554.2	0	?	0	525	Calibration	-	1129	11.3179	7038.94	0	?	0	525	Calibration	-	1129	11.3179	7041.62	0	?	0	525	Calibration	-	1129	11.3194	5697.67	0	?	0	525	Calibration	-	1129	11.3179	5052.18	0	?
1130	11.3284	10888.6	0	?	0	525	Calibration	-	1130	11.3299	19497.1	0	?	0	525	Calibration	-	1130	11.3279	7047.23	0	?	0	525	Calibration	-	1130	11.3279	7061.96	0	?	0	525	Calibration	-	1130	11.3294	5693.81	0	?	0	525	Calibration	-	1130	11.3279	5062.99	0	?
1131	11.3385	10873.7	0	?	0	525	Calibration	-	1131	11.3399	19467	0	?	0	525	Calibration	-	1131	11.338	7039.92	0	?	0	525	Calibration	-	1131	11.338	7053.63	0	?	0	525	Calibration	-	1131	11.3394	5693.13	0	?	0	525	Calibration	-	1131	11.338	5051.74	0	?
1132	11.3485	10967.4	0	?	0	525	Calibration	-	1132	11.35	19482.7	0	?	0	525	Calibration	-	1132	11.348	7054.81	0	?	0	525	Calibration	-	1132	11.348	7048.93	0	?	0	525	Calibration	-	1132	11.3495	5682.91	0	?	0	525	Calibration	-	1132	11.348	5053.2	0	?
1133	11.3585	10983	0	?	0	525	Calibration	-	1133	11.36	19395.5	0	?	0	525	Calibration	-	1133	11.358	7049.17	0	?	0	525	Calibration	-	1133	11.358	7042.51	0	?	0	525	Calibration	-	1133	11.3595	5706.97	0	?	0	525	Calibration	-	1133	11.358	5045.11	0	?
1134	11.3685	10933.5	0	?	0	525	Calibration	-	1134	11.37	19574.9	0	?	0	525	Calibration	-	1134	11.368	7038.73	0	?	0	525	Calibration	-	1134	11.368	7025.3	0	?	0	525	Calibration	-	1134	11.3695	5700.76	0	?	0	525	Calibration	-	1134	11.368	5043.67	0	?
1135	11.3785	11046.7	0	?	0	525	Calibration	-	1135	11.38	19604.7	0	?	0	525	Calibration	-	1135	11.378	7032.67	0	?	0	525	Calibration	-	1135	11.378	7033.64	0	?	0	525	Calibration	-	1135	11.3795	5715.86	0	?	0	525	Calibration	-	1135	11.378	5070.65	0	?
1136	11.3885	11086.8	0	?	0	525	Calibration	-	1136	11.39	19622.3	0	?	0	525	Calibration	-	1136	11.388	7027.45	0	?	0	525	Calibration	-	1136	11.388	7050.54	0	?	0	525	Calibration	-	1136	11.3895	5699.85	0	?	0	525	Calibration	-	1136	11.388	5059.08	0	?
1137	11.3985	11129.8	0	?	0	525	Calibration	-	1137	11.4001	19650.7	0	?	0	525	Calibration	-	1137	11.398	7017.4	0	?	0	525	Calibration	-	1137	11.398	7023.84	0	?	0	525	Calibration	-	1137	11.3996	5708.16	0	?	0	525	Calibration	-	1137	11.398	5051.97	0	?
1138	11.4086	11091.8	0	?	0	525	Calibration	-	1138	11.4101	19664.1	0	?	0	525	Calibration	-	1138	11.4081	7037.14	0	?	0	525	Calibration	-	1138	11.4081	7018.45	0	?	0	525	Calibration	-	1138	11.4096	5694.33	0	?	0	525	Calibration	-	1138	11.4081	5048.08	0	?
1139	11.4186	11029.1	0	?	0	525	Calibration	-	1139	11.4201	19584.6	0	?	0	525	Calibration	-	1139	11.4181	7038.85	0	?	0	525	Calibration	-	1139	11.4181	7008.87	0	?	0	525	Calibration	-	1139	11.4196	5696.65	0	?	0	525	Calibration	-	1139	11.4181	5062.13	0	?
1140	11.4286	11043.7	0	?	0	525	Calibration	-	1140	11.4301	19513.2	0	?	0	525	Calibration	-	1140	11.4281	7028.57	0	?	0	525	Calibration	-	1140	11.4281	7007.29	0	?	0	525	Calibration	-	1140	11.4296	5710.19	0	?	0	525	Calibration	-	1140	11.4281	5047.52	0	?
1141	11.4386	11023.6	0	?	0	525	Calibration	-	1141	11.4401	19459.7	0	?	0	525	Calibration	-	1141	11.4381	7023.51	0	?	0	525	Calibration	-	1141	11.4381	7028.89	0	?	0	525	Calibration	-	1141	11.4396	5691.88	0	?	0	525	Calibration	-	1141	11.4381	5055.86	0	?
1142	11.4486	10901.2	0	?	0	525	Calibration	-	1142	11.4501	19466	0	?	0	525	Calibration	-	1142	11.4481	7018.49	0	?	0	525	Calibration	-	1142	11.4481	7038.42	0	?	0	525	Calibration	-	1142	11.4496	5694.32	0	?	0	525	Calibration	-	1142	11.4481	5048.56	0	?
1143	11.4586	10828	0	?	0	525	Calibration	-	1143	11.4602	19498.5	0	?	0	525	Calibration	-	1143	11.4581	7002.58	0	?	0	525	Calibration	-	1143	11.4581	7043.29	0	?	0	525	Calibration	-	1143	11.4597	5681.14	0	?	0	525	Calibration	-	1143	11.4581	5066.39	0	?
1144	11.4687	10800.8	0	?	0	525	Calibration	-	1144	11.4702	19489.3	0	?	0	525	Calibration	-	1144	11.4682	7011.22	0	?	0	525	Calibration	-	1144	11.4682	7044.55	0	?	0	525	Calibration	-	1144	11.4697	5699.87	0	?	0	525	Calibration	-	1144	11.4682	5052.67	0	?
1145	11.4787	10759	0	?	0	525	Calibration	-	1145	11.4802	19469.8	0	?	0	525	Calibration	-	1145	11.4782	7025.2	0	?	0	525	Calibration	-	1145	11.4782	7044.57	0	?	0	525	Calibration	-	1145	11.4797	5676.68	0	?	0	525	Calibration	-	1145	11.4782	5062.77	0	?
1146	11.4887	10899	0	?	0	525	Calibration	-	1146	11.4902	19547.6	0	?	0	525	Calibration	-	1146	11.4882	7018.85	0	?	0	525	Calibration	-	1146	11.4882	7025.74	0	?	0	525	Calibration	-	1146	11.4897	5697.09	0	?	0	525	Calibration	-	1146	11.4882	5029.01	0	?
1147	11.4987	11075.3	0	?	0	525	Calibration	-	1147	11.5002	19558.3	0	?	0	525	Calibration	-	1147	11.4982	7033.88	0	?	0	525	Calibration	-	1147	11.4982	7042.55	0	?	0	525	Calibration	-	1147	11.4997	5686.73	0	?	0	525	Calibration	-	1147	11.4982	5046.66	0	?
1148	11.5087	11196.3	0	?	0	525	Calibration	-	1148	11.5102	19552.7	0	?	0	525	Calibration	-	1148	11.5082	7038.7	0	?	0	525	Calibration	-	1148	11.5082	7053.13	0	?	0	525	Calibration	-	1148	11.5097	5687.08	0	?	0	525	Calibration	-	1148	11.5082	5038.05	0	?
1149	11.5187	11084	0	?	0	525	Calibration	-	1149	11.5203	19565.2	0	?	0	525	Calibration	-	1149	11.5182	7035.64	0	?	0	525	Calibration	-	1149	11.5182	7037.34	0	?	0	525	Calibration	-	1149	11.5198	5697.63	0	?	0	525	Calibration	-	1149	11.5182	5062.53	0	?
1150	11.5288	10913.4	0	?	0	525	Calibration	-	1150	11.5303	19542.7	0	?	0	525	Calibration	-	1150	11.5283	7015.27	0	?	0	525	Calibration	-	1150	11.5283	7044.3	0	?	0	525	Calibration	-	1150	11.5298	5712.4	0	?	0	525	Calibration	-	1150	11.5283	5057.95	0	?
1151	11.5388	10939.9	0	?	0	525	Calibration	-	1151	11.5403	19475	0	?	0	525	Calibration	-	1151	11.5383	7032.06	0	?	0	525	Calibration	-	1151	11.5383	7026.53	0	?	0	525	Calibration	-	1151	11.5398	5696.41	0	?	0	525	Calibration	-	1151	11.5383	5052.78	0	?
1152	11.5488	11073.2	0	?	0	525	Calibration	-	1152	11.5503	19503.4	0	?	0	525	Calibration	-	1152	11.5483	7041.25	0	?	0	525	Calibration	-	1152	11.5483	7035.59	0	?	0	525	Calibration	-	1152	11.5498	5686.27	0	?	0	525	Calibration	-	1152	11.5483	5059.43	0	?
1153	11.5588	11219.5	0	?	0	525	Calibration	-	1153	11.5603	19489.9	0	?	0	525	Calibration	-	1153	11.5583	7046.94	0	?	0	525	Calibration	-	1153	11.5583	7046.06	0	?	0	525	Calibration	-	1153	11.5598	5673.13	0	?	0	525	Calibration	-	1153	11.5583	5055.04	0	?
1154	11.5688	11331.6	0	?	0	525	Calibration	-	1154	11.5704	19520.1	0	?	0	525	Calibration	-	1154	11.5683	7040.54	0	?	0	525	Calibration	-	1154	11.5683	7056.08	0	?	0	525	Calibration	-	1154	11.5698	5665.86	0	?	0	525	Calibration	-	1154	11.5683	5039.91	0	?
1155	11.5788	11442.9	0	?	0	525	Calibration	-	1155	11.5804	19467.8	0	?	0	525	Calibration	-	1155	11.5783	7043.6	0	?	0	525	Calibration	-	1155	11.5783	7038.89	0	?	0	525	Calibration	-	1155	11.5799	5670.09	0	?	0	525	Calibration	-	1155	11.5783	5067.77	0	?
1156	11.5889	11470.1	0	?	0	525	Calibration	-	1156	11.5904	19509.4	0	?	0	525	Calibration	-	1156	11.5883	7029.24	0	?	0	525	Calibration	-	1156	11.5883	7038.68	0	?	0	525	Calibration	-	1156	11.5899	5684.11	0	?	0	525	Calibration	-	1156	11.5883	5056.17	0	?
1157	11.5989	11478	0	?	0	525	Calibration	-	1157	11.6004	19547.8	0	?	0	525	Calibration	-	1157	11.5984	7040.7	0	?	0	525	Calibration	-	1157	11.5984	7047.46	0	?	0	525	Calibration	-	1157	11.5999	5705.82	0	?	0	525	Calibration	-	1157	11.5984	5066.64	0	?
1158	11.6089	11399.9	0	?	0	525	Calibration	-	1158	11.6104	19461.8	0	?	0	525	Calibration	-	1158	11.6084	7037.97	0	?	0	525	Calibration	-	1158	11.6084	7044.25	0	?	0	525	Calibration	-	1158	11.6099	5675.35	0	?	0	525	Calibration	-	1158	11.6084	5044.53	0	?
1159	11.6189	11178.1	0	?	0	525	Calibration	-	1159	11.6204	19424.9	0	?	0	525	Calibration	-	1159	11.6184	7017.91	0	?	0	525	Calibration	-	1159	11.6184	7033.49	0	?	0	525	Calibration	-	1159	11.6199	5681.48	0	?	0	525	Calibration	-	1159	11.6184	5073.56	0	?
1160	11.6289	11021.7	0	?	0	525	Calibration	-	1160	11.6305	19429.4	0	?	0	525	Calibration	-	1160	11.6284	7025.2	0	?	0	525	Calibration	-	1160	11.6284	7033.69	0	?	0	525	Calibration	-	1160	11.6299	5698.51	0	?	0	525	Calibration	-	1160	11.6284	5042.75	0	?
1161	11.6389	10926.6	0	?	0	525	Calibration	-	1161	11.6405	19372.6	0	?	0	525	Calibration	-	1161	11.6384	7034.03	0	?	0	525	Calibration	-	1161	11.6384	7015.9	0	?	0	525	Calibration	-	1161	11.64	5678.7	0	?	0	525	Calibration	-	1161	11.6384	5065.28	0	?
1162	11.649	10876.1	0	?	0	525	Calibration	-	1162	11.6505	19402.4	0	?	0	525	Calibration	-	1162	11.6484	7036.04	0	?	0	525	Calibration	-	1162	11.6484	7042.59	0	?	0	525	Calibration	-	1162	11.65	5673.42	0	?	0	525	Calibration	-	1162	11.6484	5053.98	0	?
1163	11.659	10824.4	0	?	0	525	Calibration	-	1163	11.6605	19373.4	0	?	0	525	Calibration	-	1163	11.6585	7031.43	0	?	0	525	Calibration	-	1163	11.6585	7037.33	0	?	0	525	Calibration	-	1163	11.66	5678.24	0	?	0	525	Calibration	-	1163	11.6585	5048.71	0	?
1164	11.669	10764.8	0	?	0	525	Calibration	-	1164	11.6705	19365.3	0	?	0	525	Calibration	-	1164	11.6685	7037.98	0	?	0	525	Calibration	-	1164	11.6685	7038.36	0	?	0	525	Calibration	-	1164	11.67	5689.41	0	?	0	525	Calibration	-	1164	11.6685	5035.55	0	?
1165	11.679	10719.9	0	?	0	525	Calibration	-	1165	11.6805	19351.5	0	?	0	525	Calibration	-	1165	11.6785	7030.74	0	?	0	525	Calibration	-	1165	11.6785	7025.31	0	?	0	525	Calibration	-	1165	11.68	5674.6	0	?	0	525	Calibration	-	1165	11.6785	5064.32	0	?
1166	11.689	10643	0	?	0	525	Calibration	-	1166	11.6906	19340.5	0	?	0	525	Calibration	-	1166	11.6885	7027.46	0	?	0	525	Calibration	-	1166	11.6885	7024.89	0	?	0	525	Calibration	-	1166	11.69	5680.28	0	?	0	525	Calibration	-	1166	11.6885	5045.33	0	?
1167	11.699	10525.5	0	?	0	525	Calibration	-	1167	11.7006	19333.4	0	?	0	525	Calibration	-	1167	11.6985	7036.23	0	?	0	525	Calibration	-	1167	11.6985	7014.71	0	?	0	525	Calibration	-	1167	11.7001	5689.71	0	?	0	525	Calibration	-	1167	11.6985	5052.89	0	?
1168	11.7091	10497.3	0	?	0	525	Calibration	-	1168	11.7106	19364.2	0	?	0	525	Calibration	-	1168	11.7085	7039.54	0	?	0	525	Calibration	-	1168	11.7085	7008.63	0	?	0	525	Calibration	-	1168	11.7101	5668.05	0	?	0	525	Calibration	-	1168	11.7085	5037.72	0	?
1169	11.7191	10511	0	?	0	525	Calibration	-	1169	11.7206	19377.7	0	?	0	525	Calibration	-	1169	11.7186	7037.41	0	?	0	525	Calibration	-	1169	11.7186	7037.27	0	?	0	525	Calibration	-	1169	11.7201	5681.89	0	?	0	525	Calibration	-	1169	11.7186	5029.55	0	?
1170	11.7291	10521.5	0	?	0	525	Calibration	-	1170	11.7306	19431	0	?	0	525	Calibration	-	1170	11.7286	7039.13	0	?	0	525	Calibration	-	1170	11.7286	7020.06	0	?	0	525	Calibration	-	1170	11.7301	5684.66	0	?	0	525	Calibration	-	1170	11.7286	5041.99	0	?
1171	11.7391	10534.2	0	?	0	525	Calibration	-	1171	11.7407	19611	0	?	0	525	Calibration	-	1171	11.7386	7022.84	0	?	0	525	Calibration	-	1171	11.7386	7030.64	0	?	0	525	Calibration	-	1171	11.7401	5680.84	0	?	0	525	Calibration	-	1171	11.7386	5044.02	0	?
1172	11.7491	10485.6	0	?	0	525	Calibration	-	1172	11.7507	19635.7	0	?	0	525	Calibration	-	1172	11.7486	7034.02	0	?	0	525	Calibration	-	1172	11.7486	7023.61	0	?	0	525	Calibration	-	1172	11.7502	5668.72	0	?	0	525	Calibration	-	1172	11.7486	5060.9	0	?
1173	11.7591	10606.9	0	?	0	525	Calibration	-	1173	11.7607	19639.2	0	?	0	525	Calibration	-	1173	11.7586	7042.07	0	?	0	525	Calibration	-	1173	11.7586	7036.71	0	?	0	525	Calibration	-	1173	11.7602	5652.31	0	?	0	525	Calibration	-	1173	11.7586	5040.75	0	?
1174	11.7692	10769	0	?	0	525	Calibration	-	1174	11.7707	19624	0	?	0	525	Calibration	-	1174	11.7686	7032.57	0	?	0	525	Calibration	-	1174	11.7686	7030.56	0	?	0	525	Calibration	-	1174	11.7702	5662.88	0	?	0	525	Calibration	-	1174	11.7686	5051.97	0	?
1175	11.7792	10938.2	0	?	0	525	Calibration	-	1175	11.7807	19566.4	0	?	0	525	Calibration	-	1175	11.7787	7032.41	0	?	0	525	Calibration	-	1175	11.7787	7021.17	0	?	0	525	Calibration	-	1175	11.7802	5683.47	0	?	0	525	Calibration	-	1175	11.7787	5053.56	0	?
1176	11.7892	11109.9	0	?	0	525	Calibration	-	1176	11.7907	19481.5	0	?	0	525	Calibration	-	1176	11.7887	7011.35	0	?	0	525	Calibration	-	1176	11.7887	7025.67	0	?	0	525	Calibration	-	1176	11.7902	5656.02	0	?	0	525	Calibration	-	1176	11.7887	5034.49	0	?
1177	11.7992	11169.2	0	?	0	525	Calibration	-	1177	11.8008	19478.6	0	?	0	525	Calibration	-	1177	11.7987	7023.37	0	?	0	525	Calibration	-	1177	11.7987	7032.85	0	?	0	525	Calibration	-	1177	11.8002	5679.49	0	?	0	525	Calibration	-	1177	11.7987	5055.3	0	?
1178	11.8092	11192.2	0	?	0	525	Calibration	-	1178	11.8108	19408.1	0	?	0	525	Calibration	-	1178	11.8087	7017.95	0	?	0	525	Calibration	-	1178	11.8087	7020.85	0	?	0	525	Calibration	-	1178	11.8103	5675.69	0	?	0	525	Calibration	-	1178	11.8087	5042.44	0	?
1179	11.8192	11223.8	0	?	0	525	Calibration	-	1179	11.8208	19347.2	0	?	0	525	Calibration	-	1179	11.8187	7030.74	0	?	0	525	Calibration	-	1179	11.8187	7017.01	0	?	0	525	Calibration	-	1179	11.8203	5663.05	0	?	0	525	Calibration	-	1179	11.8187	5067.24	0	?
1180	11.8292	11181.5	0	?	0	525	Calibration	-	1180	11.8308	19375.1	0	?	0	525	Calibration	-	1180	11.8287	7043.44	0	?	0	525	Calibration	-	1180	11.8287	7000.38	0	?	0	525	Calibration	-	1180	11.8303	5670.93	0	?	0	525	Calibration	-	1180	11.8287	5047.29	0	?
1181	11.8393	11049.7	0	?	0	525	Calibration	-	1181	11.8408	19413.2	0	?	0	525	Calibration	-	1181	11.8387	7022.02	0	?	0	525	Calibration	-	1181	11.8387	6993.23	0	?	0	525	Calibration	-	1181	11.8403	5660.65	0	?	0	525	Calibration	-	1181	11.8387	5061.04	0	?
1182	11.8493	10953.5	0	?	0	525	Calibration	-	1182	11.8508	19366.7	0	?	0	525	Calibration	-	1182	11.8488	7020.35	0	?	0	525	Calibration	-	1182	11.8488	7004.63	0	?	0	525	Calibration	-	1182	11.8503	5665.57	0	?	0	525	Calibration	-	1182	11.8488	5054.71	0	?
1183	11.8593	10860.7	0	?	0	525	Calibration	-	1183	11.8609	19403.2	0	?	0	525	Calibration	-	1183	11.8588	7025.81	0	?	0	525	Calibration	-	1183	11.8588	7019.34	0	?	0	525	Calibration	-	1183	11.8603	5687.12	0	?	0	525	Calibration	-	1183	11.8588	5048.17	0	?
1184	11.8693	10872	0	?	0	525	Calibration	-	1184	11.8709	19457.6	0	?	0	525	Calibration	-	1184	11.8688	7020.36	0	?	0	525	Calibration	-	1184	11.8688	7013.7	0	?	0	525	Calibration	-	1184	11.8704	5661.35	0	?	0	525	Calibration	-	1184	11.8688	5039.42	0	?
1185	11.8793	10870.9	0	?	0	525	Calibration	-	1185	11.8809	19453.3	0	?	0	525	Calibration	-	1185	11.8788	7019.3	0	?	0	525	Calibration	-	1185	11.8788	7001.63	0	?	0	525	Calibration	-	1185	11.8804	5692.17	0	?	0	525	Calibration	-	1185	11.8788	5044.21	0	?
1186	11.8893	10922.4	0	?	0	525	Calibration	-	1186	11.8909	19491.6	0	?	0	525	Calibration	-	1186	11.8888	7033.56	0	?	0	525	Calibration	-	1186	11.8888	7011.32	0	?	0	525	Calibration	-	1186	11.8904	5688.68	0	?	0	525	Calibration	-	1186	11.8888	5031.07	0	?
1187	11.8994	10871.6	0	?	0	525	Calibration	-	1187	11.9009	19572.7	0	?	0	525	Calibration	-	1187	11.8988	7024.57	0	?	0	525	Calibration	-	1187	11.8988	7019.82	0	?	0	525	Calibration	-	1187	11.9004	5680.48	0	?	0	525	Calibration	-	1187	11.8988	5048.15	0	?
1188	11.9094	10880	0	?	0	525	Calibration	-	1188	11.911	19562.7	0	?	0	525	Calibration	-	1188	11.9089	7030.45	0	?	0	525	Calibration	-	1188	11.9089	7006.25	0	?	0	525	Calibration	-	1188	11.9104	5676.88	0	?	0	525	Calibration	-	1188	11.9089	5044.41	0	?
1189	11.9194	10955.1	0	?	0	525	Calibration	-	1189	11.921	19478.6	0	?	0	525	Calibration	-	1189	11.9189	7030.84	0	?	0	525	Calibration	-	1189	11.9189	7008.68	0	?	0	525	Calibration	-	1189	11.9204	5674.26	0	?	0	525	Calibration	-	1189	11.9189	5041.6	0	?
1190	11.9294	10844.3	0	?	0	525	Calibration	-	1190	11.931	19389.8	0	?	0	525	Calibration	-	1190	11.9289	7024.7	0	?	0	525	Calibration	-	1190	11.9289	7008.66	0	?	0	525	Calibration	-	1190	11.9305	5660.52	0	?	0	525	Calibration	-	1190	11.9289	5044.52	0	?
1191	11.9394	10760.7	0	?	0	525	Calibration	-	1191	11.941	19349.5	0	?	0	525	Calibration	-	1191	11.9389	7028.2	0	?	0	525	Calibration	-	1191	11.9389	7004.61	0	?	0	525	Calibration	-	1191	11.9405	5672.61	0	?	0	525	Calibration	-	1191	11.9389	5054.29	0	?
1192	11.9494	10598	0	?	0	525	Calibration	-	1192	11.951	19328.7	0	?	0	525	Calibration	-	1192	11.9489	7034.28	0	?	0	525	Calibration	-	1192	11.9489	7006.49	0	?	0	525	Calibration	-	1192	11.9505	5664.52	0	?	0	525	Calibration	-	1192	11.9489	5028.37	0	?
1193	11.9595	10611.5	0	?	0	525	Calibration	-	1193	11.961	19337.6	0	?	0	525	Calibration	-	1193	11.9589	7029.38	0	?	0	525	Calibration	-	1193	11.9589	6999.46	0	?	0	525	Calibration	-	1193	11.9605	5667.91	0	?	0	525	Calibration	-	1193	11.9589	5026.32	0	?
1194	11.9695	10612.5	0	?	0	525	Calibration	-	1194	11.9711	19369.8	0	?	0	525	Calibration	-	1194	11.969	7028.98	0	?	0	525	Calibration	-	1194	11.969	6989.94	0	?	0	525	Calibration	-	1194	11.9705	5675.13	0	?	0	525	Calibration	-	1194	11.969	5039.42	0	?
1195	11.9795	10695.9	0	?	0	525	Calibration	-	1195	11.9811	19392.7	0	?	0	525	Calibration	-	1195	11.979	7028.38	0	?	0	525	Calibration	-	1195	11.979	6988.27	0	?	0	525	Calibration	-	1195	11.9805	5681.38	0	?	0	525	Calibration	-	1195	11.979	5045.06	0	?
1196	11.9895	10743.7	0	?	0	525	Calibration	-	1196	11.9911	19416.1	0	?	0	525	Calibration	-	1196	11.989	7016.52	0	?	0	525	Calibration	-	1196	11.989	6983.05	0	?	0	525	Calibration	-	1196	11.9906	5693.74	0	?	0	525	Calibration	-	1196	11.989	5040.68	0	?
1197	11.9995	10859.2	0	?	0	525	Calibration	-	1197	12.0011	19402.4	0	?	0	525	Calibration	-	1197	11.999	7035.58	0	?	0	525	Calibration	-	1197	11.999	7006.62	0	?	0	525	Calibration	-	1197	12.0006	5669.74	0	?	0	525	Calibration	-	1197	11.999	5040.19	0	?
1198	12.0095	10875.6	0	?	0	525	Calibration	-	1198	12.0111	19387.1	0	?	0	525	Calibration	-	1198	12.009	7028.83	0	?	0	525	Calibration	-	1198	12.009	6986.77	0	?	0	525	Calibration	-	1198	12.0106	5656.03	0	?	0	525	Calibration	-	1198	12.009	5049.04	0	?
1199	12.0196	10936.1	0	?	0	525	Calibration	-	1199	12.0211	19376.3	0	?	0	525	Calibration	-	1199	12.019	7033.52	0	?	0	525	Calibration	-	1199	12.019	6997.97	0	?	0	525	Calibration	-	1199	12.0206	5666.44	0	?	0	525	Calibration	-	1199	12.019	5063.48	0	?
1200	12.0296	11032.9	0	?	0	525	Calibration	-	1200	12.0312	19451.3	0	?	0	525	Calibration	-	1200	12.029	7030	0	?	0	525	Calibration	-	1200	12.029	7004.22	0	?	0	525	Calibration	-	1200	12.0306	5671.46	0	?	0	525	Calibration	-	1200	12.029	5048.38	0	?
1201	12.0396	11184.3	0	?	0	525	Calibration	-	1201	12.0412	19521.8	0	?	0	525	Calibration	-	1201	12.0391	7032.38	0	?	0	525	Calibration	-	1201	12.0391	7001.36	0	?	0	525	Calibration	-	1201	12.0407	5660.29	0	?	0	525	Calibration	-	1201	12.0391	5043.58	0	?
1202	12.0496	11314.7	0	?	0	525	Calibration	-	1202	12.0512	19511.1	0	?	0	525	Calibration	-	1202	12.0491	7040.44	0	?	0	525	Calibration	-	1202	12.0491	7009.61	0	?	0	525	Calibration	-	1202	12.0507	5663.02	0	?	0	525	Calibration	-	1202	12.0491	5033.04	0	?
1203	12.0596	11199.5	0	?	0	525	Calibration	-	1203	12.0612	19477.8	0	?	0	525	Calibration	-	1203	12.0591	7037.75	0	?	0	525	Calibration	-	1203	12.0591	6995.55	0	?	0	525	Calibration	-	1203	12.0607	5663.5	0	?	0	525	Calibration	-	1203	12.0591	5027.98	0	?
1204	12.0696	11136.8	0	?	0	525	Calibration	-	1204	12.0712	19390.9	0	?	0	525	Calibration	-	1204	12.0691	7049.62	0	?	0	525	Calibration	-	1204	12.0691	7009.19	0	?	0	525	Calibration	-	1204	12.0707	5666.83	0	?	0	525	Calibration	-	1204	12.0691	5018.27	0	?
1205	12.0797	11151.1	0	?	0	525	Calibration	-	1205	12.0813	19354.7	0	?	0	525	Calibration	-	1205	12.0791	7032.16	0	?	0	525	Calibration	-	1205	12.0791	7010.78	0	?	0	525	Calibration	-	1205	12.0807	5658.65	0	?	0	525	Calibration	-	1205	12.0791	5027.21	0	?
1206	12.0897	11170.7	0	?	0	525	Calibration	-	1206	12.0913	19345.1	0	?	0	525	Calibration	-	1206	12.0891	7027.46	0	?	0	525	Calibration	-	1206	12.0891	6997.25	0	?	0	525	Calibration	-	1206	12.0907	5686.93	0	?	0	525	Calibration	-	1206	12.0891	5026.88	0	?
1207	12.0997	11234.5	0	?	0	525	Calibration	-	1207	12.1013	19345.5	0	?	0	525	Calibration	-	1207	12.0992	7032.86	0	?	0	525	Calibration	-	1207	12.0992	6991.96	0	?	0	525	Calibration	-	1207	12.1008	5689.03	0	?	0	525	Calibration	-	1207	12.0992	5022.27	0	?
1208	12.1097	11268.3	0	?	0	525	Calibration	-	1208	12.1113	19379.9	0	?	0	525	Calibration	-	1208	12.1092	7036.43	0	?	0	525	Calibration	-	1208	12.1092	6985.28	0	?	0	525	Calibration	-	1208	12.1108	5662.81	0	?	0	525	Calibration	-	1208	12.1092	5037.71	0	?
1209	12.1197	11127.5	0	?	0	525	Calibration	-	1209	12.1213	19437.6	0	?	0	525	Calibration	-	1209	12.1192	7036.36	0	?	0	525	Calibration	-	1209	12.1192	6996.8	0	?	0	525	Calibration	-	1209	12.1208	5680.09	0	?	0	525	Calibration	-	1209	12.1192	5059.66	0	?
1210	12.1297	10977.9	0	?	0	525	Calibration	-	1210	12.1313	19455.5	0	?	0	525	Calibration	-	1210	12.1292	7025.46	0	?	0	525	Calibration	-	1210	12.1292	7011.97	0	?	0	525	Calibration	-	1210	12.1308	5660.02	0	?	0	525	Calibration	-	1210	12.1292	5036.97	0	?
1211	12.1398	11022.3	0	?	0	525	Calibration	-	1211	12.1414	19407.3	0	?	0	525	Calibration	-	1211	12.1392	7029.86	0	?	0	525	Calibration	-	1211	12.1392	7002.84	0	?	0	525	Calibration	-	1211	12.1408	5667.48	0	?	0	525	Calibration	-	1211	12.1392	5029.48	0	?
1212	12.1498	11030.8	0	?	0	525	Calibration	-	1212	12.1514	19391	0	?	0	525	Calibration	-	1212	12.1492	7027.78	0	?	0	525	Calibration	-	1212	12.1492	6989.81	0	?	0	525	Calibration	-	1212	12.1508	5652.18	0	?	0	525	Calibration	-	1212	12.1492	5013.12	0	?
1213	12.1598	11043	0	?	0	525	Calibration	-	1213	12.1614	19387.7	0	?	0	525	Calibration	-	1213	12.1593	7027.17	0	?	0	525	Calibration	-	1213	12.1593	6995.3	0	?	0	525	Calibration	-	1213	12.1609	5655.28	0	?	0	525	Calibration	-	1213	12.1593	5035.27	0	?
1214	12.1698	10984.5	0	?	0	525	Calibration	-	1214	12.1714	19382.6	0	?	0	525	Calibration	-	1214	12.1693	7042.3	0	?	0	525	Calibration	-	1214	12.1693	6995.32	0	?	0	525	Calibration	-	1214	12.1709	5661.26	0	?	0	525	Calibration	-	1214	12.1693	5042.62	0	?
1215	12.1798	10923.5	0	?	0	525	Calibration	-	1215	12.1814	19399.5	0	?	0	525	Calibration	-	1215	12.1793	7033.63	0	?	0	525	Calibration	-	1215	12.1793	7001.04	0	?	0	525	Calibration	-	1215	12.1809	5639.93	0	?	0	525	Calibration	-	1215	12.1793	5045.59	0	?
1216	12.1898	10851.5	0	?	0	525	Calibration	-	1216	12.1914	19408.3	0	?	0	525	Calibration	-	1216	12.1893	7026	0	?	0	525	Calibration	-	1216	12.1893	7001.41	0	?	0	525	Calibration	-	1216	12.1909	5670.84	0	?	0	525	Calibration	-	1216	12.1893	5059.69	0	?
1217	12.1999	10821.9	0	?	0	525	Calibration	-	1217	12.2015	19380.3	0	?	0	525	Calibration	-	1217	12.1993	7030.35	0	?	0	525	Calibration	-	1217	12.1993	7020.73	0	?	0	525	Calibration	-	1217	12.2009	5646.51	0	?	0	525	Calibration	-	1217	12.1993	5048.48	0	?
1218	12.2099	10648.6	0	?	0	525	Calibration	-	1218	12.2115	19380.2	0	?	0	525	Calibration	-	1218	12.2093	7032.14	0	?	0	525	Calibration	-	1218	12.2093	7006.81	0	?	0	525	Calibration	-	1218	12.2109	5662.46	0	?	0	525	Calibration	-	1218	12.2093	5039.14	0	?
1219	12.2199	10592.1	0	?	0	525	Calibration	-	1219	12.2215	19415	0	?	0	525	Calibration	-	1219	12.2193	7043.64	0	?	0	525	Calibration	-	1219	12.2193	7025.45	0	?	0	525	Calibration	-	1219	12.221	5676.26	0	?	0	525	Calibration	-	1219	12.2193	5044.14	0	?
1220	12.2299	10606.1	0	?	0	525	Calibration	-	1220	12.2315	19518.5	0	?	0	525	Calibration	-	1220	12.2294	7058.76	0	?	0	525	Calibration	-	1220	12.2294	7034.59	0	?	0	525	Calibration	-	1220	12.231	5687.12	0	?	0	525	Calibration	-	1220	12.2294	5050.69	0	?
1221	12.2399	10601.4	0	?	0	525	Calibration	-	1221	12.2415	19468	0	?	0	525	Calibration	-	1221	12.2394	7039.18	0	?	0	525	Calibration	-	1221	12.2394	7037.55	0	?	0	525	Calibration	-	1221	12.241	5674.33	0	?	0	525	Calibration	-	1221	12.2394	5049.51	0	?
1222	12.2499	10508.1	0	?	0	525	Calibration	-	1222	12.2516	19413	0	?	0	525	Calibration	-	1222	12.2494	7015.76	0	?	0	525	Calibration	-	1222	12.2494	7022.35	0	?	0	525	Calibration	-	1222	12.251	5658.75	0	?	0	525	Calibration	-	1222	12.2494	5062.64	0	?
1223	12.26	10581.4	0	?	0	525	Calibration	-	1223	12.2616	19364.9	0	?	0	525	Calibration	-	1223	12.2594	7037.97	0	?	0	525	Calibration	-	1223	12.2594	7045.36	0	?	0	525	Calibration	-	1223	12.261	5658.56	0	?	0	525	Calibration	-	1223	12.2594	5025.59	0	?
1224	12.27	10684.1	0	?	0	525	Calibration	-	1224	12.2716	19432	0	?	0	525	Calibration	-	1224	12.2694	7035.67	0	?	0	525	Calibration	-	1224	12.2694	7021.54	0	?	0	525	Calibration	-	1224	12.271	5652.63	0	?	0	525	Calibration	-	1224	12.2694	5044.32	0	?
1225	12.28	10675.7	0	?	0	525	Calibration	-	1225	12.2816	19537.7	0	?	0	525	Calibration	-	1225	12.2794	7024.32	0	?	0	525	Calibration	-	1225	12.2794	7016.89	0	?	0	525	Calibration	-	1225	12.2811	5652.37	0	?	0	525	Calibration	-	1225	12.2794	5055.85	0	?
1226	12.29	10614.1	0	?	0	525	Calibration	-	1226	12.2916	19575.9	0	?	0	525	Calibration	-	1226	12.2895	7010.3	0	?	0	525	Calibration	-	1226	12.2895	7009.38	0	?	0	525	Calibration	-	1226	12.2911	5657.42	0	?	0	525	Calibration	-	1226	12.2895	5032.39	0	?
1227	12.3	10639.1	0	?	0	525	Calibration	-	1227	12.3016	19520.2	0	?	0	525	Calibration	-	1227	12.2995	7026.21	0	?	0	525	Calibration	-	1227	12.2995	7000.46	0	?	0	525	Calibration	-	1227	12.3011	5670.42	0	?	0	525	Calibration	-	1227	12.2995	5038.58	0	?
1228	12.31	10660.6	0	?	0	525	Calibration	-	1228	12.3117	19372.6	0	?	0	525	Calibration	-	1228	12.3095	7029.05	0	?	0	525	Calibration	-	1228	12.3095	6997.62	0	?	0	525	Calibration	-	1228	12.3111	5664.3	0	?	0	525	Calibration	-	1228	12.3095	5044.28	0	?
1229	12.32	10677.5	0	?	0	525	Calibration	-	1229	12.3217	19344.1	0	?	0	525	Calibration	-	1229	12.3195	7032.29	0	?	0	525	Calibration	-	1229	12.3195	7006.92	0	?	0	525	Calibration	-	1229	12.3211	5672.82	0	?	0	525	Calibration	-	1229	12.3195	5048.76	0	?
1230	12.3301	10719.1	0	?	0	525	Calibration	-	1230	12.3317	19316.2	0	?	0	525	Calibration	-	1230	12.3295	7018.72	0	?	0	525	Calibration	-	1230	12.3295	6987.01	0	?	0	525	Calibration	-	1230	12.3311	5655.53	0	?	0	525	Calibration	-	1230	12.3295	5033.58	0	?
1231	12.3401	10767.3	0	?	0	525	Calibration	-	1231	12.3417	19386.5	0	?	0	525	Calibration	-	1231	12.3395	7018.13	0	?	0	525	Calibration	-	1231	12.3395	6986.51	0	?	0	525	Calibration	-	1231	12.3412	5653.31	0	?	0	525	Calibration	-	1231	12.3395	5042.77	0	?
1232	12.3501	10851.1	0	?	0	525	Calibration	-	1232	12.3517	19436	0	?	0	525	Calibration	-	1232	12.3496	7011.21	0	?	0	525	Calibration	-	1232	12.3496	6992.24	0	?	0	525	Calibration	-	1232	12.3512	5657.61	0	?	0	525	Calibration	-	1232	12.3496	5038.56	0	?
1233	12.3601	10832.9	0	?	0	525	Calibration	-	1233	12.3617	19516.4	0	?	0	525	Calibration	-	1233	12.3596	7009.29	0	?	0	525	Calibration	-	1233	12.3596	6990.75	0	?	0	525	Calibration	-	1233	12.3612	5674.78	0	?	0	525	Calibration	-	1233	12.3596	5038.49	0	?
1234	12.3701	10938.5	0	?	0	525	Calibration	-	1234	12.3718	19532.7	0	?	0	525	Calibration	-	1234	12.3696	7013.65	0	?	0	525	Calibration	-	1234	12.3696	6991.83	0	?	0	525	Calibration	-	1234	12.3712	5639.54	0	?	0	525	Calibration	-	1234	12.3696	5047.55	0	?
1235	12.3801	10997.2	0	?	0	525	Calibration	-	1235	12.3818	19446.3	0	?	0	525	Calibration	-	1235	12.3796	7008.96	0	?	0	525	Calibration	-	1235	12.3796	7012.12	0	?	0	525	Calibration	-	1235	12.3812	5663.12	0	?	0	525	Calibration	-	1235	12.3796	5029.91	0	?
1236	12.3902	10999	0	?	0	525	Calibration	-	1236	12.3918	19379	0	?	0	525	Calibration	-	1236	12.3896	7003.02	0	?	0	525	Calibration	-	1236	12.3896	7013.83	0	?	0	525	Calibration	-	1236	12.3913	5663.53	0	?	0	525	Calibration	-	1236	12.3896	5049.14	0	?
1237	12.4002	10935.2	0	?	0	525	Calibration	-	1237	12.4018	19402.4	0	?	0	525	Calibration	-	1237	12.3996	7012.46	0	?	0	525	Calibration	-	1237	12.3996	6996.14	0	?	0	525	Calibration	-	1237	12.4013	5673.73	0	?	0	525	Calibration	-	1237	12.3996	5051.98	0	?
1238	12.4102	10903.7	0	?	0	525	Calibration	-	1238	12.4118	19375.5	0	?	0	525	Calibration	-	1238	12.4096	7009.92	0	?	0	525	Calibration	-	1238	12.4096	7000.5	0	?	0	525	Calibration	-	1238	12.4113	5681.87	0	?	0	525	Calibration	-	1238	12.4096	5043.12	0	?
1239	12.4202	10876.1	0	?	0	525	Calibration	-	1239	12.4219	19320.9	0	?	0	525	Calibration	-	1239	12.4197	7016.02	0	?	0	525	Calibration	-	1239	12.4197	6997.88	0	?	0	525	Calibration	-	1239	12.4213	5667.5	0	?	0	525	Calibration	-	1239	12.4197	5045.47	0	?
1240	12.4302	10958	0	?	0	525	Calibration	-	1240	12.4319	19279.8	0	?	0	525	Calibration	-	1240	12.4297	7012.09	0	?	0	525	Calibration	-	1240	12.4297	7002.26	0	?	0	525	Calibration	-	1240	12.4313	5653.93	0	?	0	525	Calibration	-	1240	12.4297	5042.05	0	?
1241	12.4402	11012.7	0	?	0	525	Calibration	-	1241	12.4419	19293.2	0	?	0	525	Calibration	-	1241	12.4397	7013.71	0	?	0	525	Calibration	-	1241	12.4397	7010.78	0	?	0	525	Calibration	-	1241	12.4413	5654.47	0	?	0	525	Calibration	-	1241	12.4397	5035.95	0	?
1242	12.4503	11042.1	0	?	0	525	Calibration	-	1242	12.4519	19277.2	0	?	0	525	Calibration	-	1242	12.4497	7019.24	0	?	0	525	Calibration	-	1242	12.4497	7008.08	0	?	0	525	Calibration	-	1242	12.4514	5676.23	0	?	0	525	Calibration	-	1242	12.4497	5028.74	0	?
1243	12.4603	11083.8	0	?	0	525	Calibration	-	1243	12.4619	19238.7	0	?	0	525	Calibration	-	1243	12.4597	7014.23	0	?	0	525	Calibration	-	1243	12.4597	7009.2	0	?	0	525	Calibration	-	1243	12.4614	5658.45	0	?	0	525	Calibration	-	1243	12.4597	5035.26	0	?
1244	12.4703	11138.5	0	?	0	525	Calibration	-	1244	12.4719	19249.8	0	?	0	525	Calibration	-	1244	12.4697	7034.91	0	?	0	525	Calibration	-	1244	12.4697	7003.33	0	?	0	525	Calibration	-	1244	12.4714	5670.79	0	?	0	525	Calibration	-	1244	12.4697	5034.82	0	?
1245	12.4803	11105.4	0	?	0	525	Calibration	-	1245	12.482	19309.6	0	?	0	525	Calibration	-	1245	12.4798	7010.41	0	?	0	525	Calibration	-	1245	12.4798	7011.28	0	?	0	525	Calibration	-	1245	12.4814	5650.41	0	?	0	525	Calibration	-	1245	12.4798	5050.74	0	?
1246	12.4903	11015.6	0	?	0	525	Calibration	-	1246	12.492	19336.2	0	?	0	525	Calibration	-	1246	12.4898	7019.66	0	?	0	525	Calibration	-	1246	12.4898	7011.52	0	?	0	525	Calibration	-	1246	12.4914	5637.56	0	?	0	525	Calibration	-	1246	12.4898	5045.55	0	?
1247	12.5003	10901.7	0	?	0	525	Calibration	-	1247	12.502	19303.6	0	?	0	525	Calibration	-	1247	12.4998	7033.42	0	?	0	525	Calibration	-	1247	12.4998	7020.04	0	?	0	525	Calibration	-	1247	12.5014	5646.13	0	?	0	525	Calibration	-	1247	12.4998	5051.59	0	?
1248	12.5104	10906.6	0	?	0	525	Calibration	-	1248	12.512	19218.7	0	?	0	525	Calibration	-	1248	12.5098	7034.76	0	?	0	525	Calibration	-	1248	12.5098	6995.63	0	?	0	525	Calibration	-	1248	12.5115	5635.39	0	?	0	525	Calibration	-	1248	12.5098	5036.95	0	?
1249	12.5204	10753.3	0	?	0	525	Calibration	-	1249	12.522	19168.4	0	?	0	525	Calibration	-	1249	12.5198	7025.65	0	?	0	525	Calibration	-	1249	12.5198	7004.43	0	?	0	525	Calibration	-	1249	12.5215	5669.12	0	?	0	525	Calibration	-	1249	12.5198	5043.16	0	?
1250	12.5304	10724.2	0	?	0	525	Calibration	-	1250	12.532	19168.5	0	?	0	525	Calibration	-	1250	12.5298	7025.76	0	?	0	525	Calibration	-	1250	12.5298	6997.52	0	?	0	525	Calibration	-	1250	12.5315	5656.1	0	?	0	525	Calibration	-	1250	12.5298	5034.12	0	?
1251	12.5404	10740.9	0	?	0	525	Calibration	-	1251	12.5421	19143.8	0	?	0	525	Calibration	-	1251	12.5399	7020.25	0	?	0	525	Calibration	-	1251	12.5399	6992.21	0	?	0	525	Calibration	-	1251	12.5415	5651.58	0	?	0	525	Calibration	-	1251	12.5399	5030.36	0	?
1252	12.5504	10703.9	0	?	0	525	Calibration	-	1252	12.5521	19192	0	?	0	525	Calibration	-	1252	12.5499	7030.76	0	?	0	525	Calibration	-	1252	12.5499	6990.25	0	?	0	525	Calibration	-	1252	12.5515	5647.61	0	?	0	525	Calibration	-	1252	12.5499	5022.85	0	?
1253	12.5604	10557.3	0	?	0	525	Calibration	-	1253	12.5621	19207.4	0	?	0	525	Calibration	-	1253	12.5599	7038.5	0	?	0	525	Calibration	-	1253	12.5599	6993.52	0	?	0	525	Calibration	-	1253	12.5615	5646.84	0	?	0	525	Calibration	-	1253	12.5599	5020.25	0	?
1254	12.5705	10516.8	0	?	0	525	Calibration	-	1254	12.5721	19186	0	?	0	525	Calibration	-	1254	12.5699	7029.15	0	?	0	525	Calibration	-	1254	12.5699	7008.09	0	?	0	525	Calibration	-	1254	12.5716	5662.71	0	?	0	525	Calibration	-	1254	12.5699	5027.77	0	?
1255	12.5805	10502.3	0	?	0	525	Calibration	-	1255	12.5821	19239.2	0	?	0	525	Calibration	-	1255	12.5799	7027.09	0	?	0	525	Calibration	-	1255	12.5799	7000.28	0	?	0	525	Calibration	-	1255	12.5816	5666.79	0	?	0	525	Calibration	-	1255	12.5799	5042.54	0	?
1256	12.5905	10561.6	0	?	0	525	Calibration	-	1256	12.5921	19270.7	0	?	0	525	Calibration	-	1256	12.5899	7011.46	0	?	0	525	Calibration	-	1256	12.5899	6986.12	0	?	0	525	Calibration	-	1256	12.5916	5649.82	0	?	0	525	Calibration	-	1256	12.5899	5043.22	0	?
1257	12.6005	10651.4	0	?	0	525	Calibration	-	1257	12.6022	19232	0	?	0	525	Calibration	-	1257	12.6	7007.09	0	?	0	525	Calibration	-	1257	12.6	6994.67	0	?	0	525	Calibration	-	1257	12.6016	5665.25	0	?	0	525	Calibration	-	1257	12.6	5047.83	0	?
1258	12.6105	10804.9	0	?	0	525	Calibration	-	1258	12.6122	19305.8	0	?	0	525	Calibration	-	1258	12.61	7009.79	0	?	0	525	Calibration	-	1258	12.61	7021.89	0	?	0	525	Calibration	-	1258	12.6116	5644.27	0	?	0	525	Calibration	-	1258	12.61	5043.16	0	?
1259	12.6205	10931.9	0	?	0	525	Calibration	-	1259	12.6222	19336.7	0	?	0	525	Calibration	-	1259	12.62	7027.57	0	?	0	525	Calibration	-	1259	12.62	7017.82	0	?	0	525	Calibration	-	1259	12.6216	5654.99	0	?	0	525	Calibration	-	1259	12.62	5039.52	0	?
1260	12.6306	11008.7	0	?	0	525	Calibration	-	1260	12.6322	19301	0	?	0	525	Calibration	-	1260	12.63	7049.41	0	?	0	525	Calibration	-	1260	12.63	6995.78	0	?	0	525	Calibration	-	1260	12.6317	5657.75	0	?	0	525	Calibration	-	1260	12.63	5035.43	0	?
1261	12.6406	11018.5	0	?	0	525	Calibration	-	1261	12.6422	19237.8	0	?	0	525	Calibration	-	1261	12.64	7040.42	0	?	0	525	Calibration	-	1261	12.64	6985.28	0	?	0	525	Calibration	-	1261	12.6417	5662.01	0	?	0	525	Calibration	-	1261	12.64	5051.72	0	?
1262	12.6506	11022.5	0	?	0	525	Calibration	-	1262	12.6523	19254.9	0	?	0	525	Calibration	-	1262	12.65	7022.19	0	?	0	525	Calibration	-	1262	12.65	6987.34	0	?	0	525	Calibration	-	1262	12.6517	5657.87	0	?	0	525	Calibration	-	1262	12.65	5049.48	0	?
1263	12.6606	11098.2	0	?	0	525	Calibration	-	1263	12.6623	19304	0	?	0	525	Calibration	-	1263	12.66	7035.73	0	?	0	525	Calibration	-	1263	12.66	7005.42	0	?	0	525	Calibration	-	1263	12.6617	5652.76	0	?	0	525	Calibration	-	1263	12.66	5034.08	0	?
1264	12.6706	11118.3	0	?	0	525	Calibration	-	1264	12.6723	19317.1	0	?	0	525	Calibration	-	1264	12.6701	7018.37	0	?	0	525	Calibration	-	1264	12.6701	6991.08	0	?	0	525	Calibration	-	1264	12.6717	5651.63	0	?	0	525	Calibration	-	1264	12.6701	5031.91	0	?
1265	12.6806	11158.5	0	?	0	525	Calibration	-	1265	12.6823	19287.2	0	?	0	525	Calibration	-	1265	12.6801	7019.54	0	?	0	525	Calibration	-	1265	12.6801	6977.69	0	?	0	525	Calibration	-	1265	12.6818	5665.63	0	?	0	525	Calibration	-	1265	12.6801	5037.61	0	?
1266	12.6907	11160.1	0	?	0	525	Calibration	-	1266	12.6923	19284.7	0	?	0	525	Calibration	-	1266	12.6901	7044.58	0	?	0	525	Calibration	-	1266	12.6901	6996.37	0	?	0	525	Calibration	-	1266	12.6918	5673.1	0	?	0	525	Calibration	-	1266	12.6901	5047.06	0	?
1267	12.7007	11241.5	0	?	0	525	Calibration	-	1267	12.7023	19316.3	0	?	0	525	Calibration	-	1267	12.7001	7034.53	0	?	0	525	Calibration	-	1267	12.7001	6987.82	0	?	0	525	Calibration	-	1267	12.7018	5673.54	0	?	0	525	Calibration	-	1267	12.7001	5041.36	0	?
1268	12.7107	11158.5	0	?	0	525	Calibration	-	1268	12.7124	19367.2	0	?	0	525	Calibration	-	1268	12.7101	7039.95	0	?	0	525	Calibration	-	1268	12.7101	6999.78	0	?	0	525	Calibration	-	1268	12.7118	5660.16	0	?	0	525	Calibration	-	1268	12.7101	5047.1	0	?
1269	12.7207	11077.6	0	?	0	525	Calibration	-	1269	12.7224	19526.5	0	?	0	525	Calibration	-	1269	12.7201	7046.07	0	?	0	525	Calibration	-	1269	12.7201	7035.63	0	?	0	525	Calibration	-	1269	12.7218	5659.07	0	?	0	525	Calibration	-	1269	12.7201	5040.86	0	?
1270	12.7307	10983.2	0	?	0	525	Calibration	-	1270	12.7324	19476.1	0	?	0	525	Calibration	-	1270	12.7302	7039.76	0	?	0	525	Calibration	-	1270	12.7302	7019.34	0	?	0	525	Calibration	-	1270	12.7318	5640.88	0	?	0	525	Calibration	-	1270	12.7302	5052.31	0	?
1271	12.7407	10999.6	0	?	0	525	Calibration	-	1271	12.7424	19371.9	0	?	0	525	Calibration	-	1271	12.7402	7027.78	0	?	0	525	Calibration	-	1271	12.7402	7015.33	0	?	0	525	Calibration	-	1271	12.7419	5631.01	0	?	0	525	Calibration	-	1271	12.7402	5024.38	0	?
1272	12.7507	11056.8	0	?	0	525	Calibration	-	1272	12.7524	19365.5	0	?	0	525	Calibration	-	1272	12.7502	7027.5	0	?	0	525	Calibration	-	1272	12.7502	7008.25	0	?	0	525	Calibration	-	1272	12.7519	5641.78	0	?	0	525	Calibration	-	1272	12.7502	5046.18	0	?
1273	12.7608	10955	0	?	0	525	Calibration	-	1273	12.7624	19335.9	0	?	0	525	Calibration	-	1273	12.7602	7047.22	0	?	0	525	Calibration	-	1273	12.7602	7014.77	0	?	0	525	Calibration	-	1273	12.7619	5634.4	0	?	0	525	Calibration	-	1273	12.7602	5037.95	0	?
1274	12.7708	10872.7	0	?	0	525	Calibration	-	1274	12.7725	19270.1	0	?	0	525	Calibration	-	1274	12.7702	7028.92	0	?	0	525	Calibration	-	1274	12.7702	6994.92	0	?	0	525	Calibration	-	1274	12.7719	5640.69	0	?	0	525	Calibration	-	1274	12.7702	5032.84	0	?
1275	12.7808	10786.4	0	?	0	525	Calibration	-	1275	12.7825	19245	0	?	0	525	Calibration	-	1275	12.7802	7030.26	0	?	0	525	Calibration	-	1275	12.7802	6978.73	0	?	0	525	Calibration	-	1275	12.7819	5642.52	0	?	0	525	Calibration	-	1275	12.7802	5038.83	0	?
1276	12.7908	10593.1	0	?	0	525	Calibration	-	1276	12.7925	19220.1	0	?	0	525	Calibration	-	1276	12.7903	7018.92	0	?	0	525	Calibration	-	1276	12.7903	6979.13	0	?	0	525	Calibration	-	1276	12.7919	5649.67	0	?	0	525	Calibration	-	1276	12.7903	5029.26	0	?
1277	12.8008	10494.6	0	?	0	525	Calibration	-	1277	12.8025	19312.3	0	?	0	525	Calibration	-	1277	12.8003	7023.71	0	?	0	525	Calibration	-	1277	12.8003	6966.29	0	?	0	525	Calibration	-	1277	12.802	5653.43	0	?	0	525	Calibration	-	1277	12.8003	5028.94	0	?
1278	12.8108	10406.8	0	?	0	525	Calibration	-	1278	12.8125	19392.3	0	?	0	525	Calibration	-	1278	12.8103	7011.03	0	?	0	525	Calibration	-	1278	12.8103	6983.59	0	?	0	525	Calibration	-	1278	12.812	5641.09	0	?	0	525	Calibration	-	1278	12.8103	5042.01	0	?
1279	12.8209	10403	0	?	0	525	Calibration	-	1279	12.8226	19440.4	0	?	0	525	Calibration	-	1279	12.8203	7015.39	0	?	0	525	Calibration	-	1279	12.8203	6982.85	0	?	0	525	Calibration	-	1279	12.822	5669.13	0	?	0	525	Calibration	-	1279	12.8203	5037	0	?
1280	12.8309	10441.6	0	?	0	525	Calibration	-	1280	12.8326	19486.5	0	?	0	525	Calibration	-	1280	12.8303	7008.32	0	?	0	525	Calibration	-	1280	12.8303	6989.07	0	?	0	525	Calibration	-	1280	12.832	5658.33	0	?	0	525	Calibration	-	1280	12.8303	5045.07	0	?
1281	12.8409	10568.1	0	?	0	525	Calibration	-	1281	12.8426	19422.5	0	?	0	525	Calibration	-	1281	12.8403	7009.04	0	?	0	525	Calibration	-	1281	12.8403	6989.98	0	?	0	525	Calibration	-	1281	12.842	5667.45	0	?	0	525	Calibration	-	1281	12.8403	5041.61	0	?
1282	12.8509	10716.1	0	?	0	525	Calibration	-	1282	12.8526	19366.6	0	?	0	525	Calibration	-	1282	12.8503	6998.18	0	?	0	525	Calibration	-	1282	12.8503	6989.86	0	?	0	525	Calibration	-	1282	12.852	5663.93	0	?	0	525	Calibration	-	1282	12.8503	5035.4	0	?
1283	12.8609	10737.3	0	?	0	525	Calibration	-	1283	12.8626	19346.1	0	?	0	525	Calibration	-	1283	12.8604	7004.83	0	?	0	525	Calibration	-	1283	12.8604	6989.26	0	?	0	525	Calibration	-	1283	12.8621	5676.9	0	?	0	525	Calibration	-	1283	12.8604	5029.71	0	?
1284	12.8709	10725.8	0	?	0	525	Calibration	-	1284	12.8726	19361	0	?	0	525	Calibration	-	1284	12.8704	7021.97	0	?	0	525	Calibration	-	1284	12.8704	6998.89	0	?	0	525	Calibration	-	1284	12.8721	5640.45	0	?	0	525	Calibration	-	1284	12.8704	5035.11	0	?
1285	12.881	10681.8	0	?	0	525	Calibration	-	1285	12.8827	19341.6	0	?	0	525	Calibration	-	1285	12.8804	6999.28	0	?	0	525	Calibration	-	1285	12.8804	7014.15	0	?	0	525	Calibration	-	1285	12.8821	5658.88	0	?	0	525	Calibration	-	1285	12.8804	5045.82	0	?
1286	12.891	10721.3	0	?	0	525	Calibration	-	1286	12.8927	19319	0	?	0	525	Calibration	-	1286	12.8904	7023.9	0	?	0	525	Calibration	-	1286	12.8904	6987.11	0	?	0	525	Calibration	-	1286	12.8921	5652.13	0	?	0	525	Calibration	-	1286	12.8904	5021.14	0	?
1287	12.901	10714.9	0	?	0	525	Calibration	-	1287	12.9027	19278.4	0	?	0	525	Calibration	-	1287	12.9004	7034.61	0	?	0	525	Calibration	-	1287	12.9004	6968.87	0	?	0	525	Calibration	-	1287	12.9021	5655.71	0	?	0	525	Calibration	-	1287	12.9004	5031.1	0	?
1288	12.911	10649.9	0	?	0	525	Calibration	-	1288	12.9127	19277.6	0	?	0	525	Calibration	-	1288	12.9104	7032.57	0	?	0	525	Calibration	-	1288	12.9104	6979.4	0	?	0	525	Calibration	-	1288	12.9121	5662.13	0	?	0	525	Calibration	-	1288	12.9104	5026.44	0	?
1289	12.921	10669.6	0	?	0	525	Calibration	-	1289	12.9227	19353.8	0	?	0	525	Calibration	-	1289	12.9205	7017.71	0	?	0	525	Calibration	-	1289	12.9205	6993.1	0	?	0	525	Calibration	-	1289	12.9222	5640.74	0	?	0	525	Calibration	-	1289	12.9205	5026.91	0	?
1290	12.931	10701.8	0	?	0	525	Calibration	-	1290	12.9327	19517.1	0	?	0	525	Calibration	-	1290	12.9305	7024.7	0	?	0	525	Calibration	-	1290	12.9305	7000.17	0	?	0	525	Calibration	-	1290	12.9322	5623.59	0	?	0	525	Calibration	-	1290	12.9305	5054.11	0	?
1291	12.9411	10702.8	0	?	0	525	Calibration	-	1291	12.9428	19486.2	0	?	0	525	Calibration	-	1291	12.9405	7024.52	0	?	0	525	Calibration	-	1291	12.9405	7010.11	0	?	0	525	Calibration	-	1291	12.9422	5647.7	0	?	0	525	Calibration	-	1291	12.9405	5034.09	0	?
1292	12.9511	10640.4	0	?	0	525	Calibration	-	1292	12.9528	19414.1	0	?	0	525	Calibration	-	1292	12.9505	7018.09	0	?	0	525	Calibration	-	1292	12.9505	6991.51	0	?	0	525	Calibration	-	1292	12.9522	5648.02	0	?	0	525	Calibration	-	1292	12.9505	5040.77	0	?
1293	12.9611	10645.6	0	?	0	525	Calibration	-	1293	12.9628	19339.4	0	?	0	525	Calibration	-	1293	12.9605	7020.4	0	?	0	525	Calibration	-	1293	12.9605	6990.06	0	?	0	525	Calibration	-	1293	12.9622	5656.7	0	?	0	525	Calibration	-	1293	12.9605	5030.52	0	?
1294	12.9711	10754.5	0	?	0	525	Calibration	-	1294	12.9728	19350	0	?	0	525	Calibration	-	1294	12.9705	7020.96	0	?	0	525	Calibration	-	1294	12.9705	6984.27	0	?	0	525	Calibration	-	1294	12.9722	5630.86	0	?	0	525	Calibration	-	1294	12.9705	5042.3	0	?
1295	12.9811	10879.9	0	?	0	525	Calibration	-	1295	12.9828	19362.4	0	?	0	525	Calibration	-	1295	12.9806	7026.3	0	?	0	525	Calibration	-	1295	12.9806	6976.21	0	?	0	525	Calibration	-	1295	12.9823	5620.13	0	?	0	525	Calibration	-	1295	12.9806	5035.9	0	?
1296	12.9911	10959.7	0	?	0	525	Calibration	-	1296	12.9929	19352	0	?	0	525	Calibration	-	1296	12.9906	7021.86	0	?	0	525	Calibration	-	1296	12.9906	6985.95	0	?	0	525	Calibration	-	1296	12.9923	5615.63	0	?	0	525	Calibration	-	1296	12.9906	5052.39	0	?
1297	13.0012	10955.3	0	?	0	525	Calibration	-	1297	13.0029	19354.5	0	?	0	525	Calibration	-	1297	13.0006	7027.52	0	?	0	525	Calibration	-	1297	13.0006	6963.17	0	?	0	525	Calibration	-	1297	13.0023	5630.96	0	?	0	525	Calibration	-	1297	13.0006	5056.92	0	?
1298	13.0112	10982.4	0	?	0	525	Calibration	-	1298	13.0129	19358.8	0	?	0	525	Calibration	-	1298	13.0106	7034.95	0	?	0	525	Calibration	-	1298	13.0106	6942.69	0	?	0	525	Calibration	-	1298	13.0123	5613.79	0	?	0	525	Calibration	-	1298	13.0106	5036.59	0	?
1299	13.0212	10876	0	?	0	525	Calibration	-	1299	13.0229	19286.8	0	?	0	525	Calibration	-	1299	13.0206	7033.79	0	?	0	525	Calibration	-	1299	13.0206	6955.64	0	?	0	525	Calibration	-	1299	13.0223	5614.12	0	?	0	525	Calibration	-	1299	13.0206	5024.74	0	?
1300	13.0312	10757.3	0	?	0	525	Calibration	-	1300	13.0329	19274.5	0	?	0	525	Calibration	-	1300	13.0306	7022.21	0	?	0	525	Calibration	-	1300	13.0306	6944.64	0	?	0	525	Calibration	-	1300	13.0324	5630.66	0	?	0	525	Calibration	-	1300	13.0306	5027.5	0	?
1301	13.0412	10803.1	0	?	0	525	Calibration	-	1301	13.0429	19361.2	0	?	0	525	Calibration	-	1301	13.0406	7031.85	0	?	0	525	Calibration	-	1301	13.0406	6949.52	0	?	0	525	Calibration	-	1301	13.0424	5623.76	0	?	0	525	Calibration	-	1301	13.0406	5038.27	0	?
1302	13.0512	10913.1	0	?	0	525	Calibration	-	1302	13.053	19505.6	0	?	0	525	Calibration	-	1302	13.0507	7001.04	0	?	0	525	Calibration	-	1302	13.0507	6944.13	0	?	0	525	Calibration	-	1302	13.0524	5624.22	0	?	0	525	Calibration	-	1302	13.0507	5036.38	0	?
1303	13.0613	10976.4	0	?	0	525	Calibration	-	1303	13.063	19557.8	0	?	0	525	Calibration	-	1303	13.0607	7009.6	0	?	0	525	Calibration	-	1303	13.0607	6948.74	0	?	0	525	Calibration	-	1303	13.0624	5641.29	0	?	0	525	Calibration	-	1303	13.0607	5022.81	0	?
1304	13.0713	11084.7	0	?	0	525	Calibration	-	1304	13.073	19497.9	0	?	0	525	Calibration	-	1304	13.0707	7029.71	0	?	0	525	Calibration	-	1304	13.0707	6963.5	0	?	0	525	Calibration	-	1304	13.0724	5645.09	0	?	0	525	Calibration	-	1304	13.0707	5029.97	0	?
1305	13.0813	11120.2	0	?	0	525	Calibration	-	1305	13.083	19497.2	0	?	0	525	Calibration	-	1305	13.0807	7013.59	0	?	0	525	Calibration	-	1305	13.0807	6975.33	0	?	0	525	Calibration	-	1305	13.0824	5658.08	0	?	0	525	Calibration	-	1305	13.0807	5031.31	0	?
1306	13.0913	11023	0	?	0	525	Calibration	-	1306	13.093	19338	0	?	0	525	Calibration	-	1306	13.0907	7017.34	0	?	0	525	Calibration	-	1306	13.0907	6967.54	0	?	0	525	Calibration	-	1306	13.0925	5643	0	?	0	525	Calibration	-	1306	13.0907	5037.43	0	?
1307	13.1013	10851.7	0	?	0	525	Calibration	-	1307	13.103	19311.1	0	?	0	525	Calibration	-	1307	13.1007	7006.87	0	?	0	525	Calibration	-	1307	13.1007	6958.92	0	?	0	525	Calibration	-	1307	13.1025	5648.25	0	?	0	525	Calibration	-	1307	13.1007	5031.47	0	?
1308	13.1113	10832.3	0	?	0	525	Calibration	-	1308	13.1131	19223.8	0	?	0	525	Calibration	-	1308	13.1108	7014.09	0	?	0	525	Calibration	-	1308	13.1108	6961.58	0	?	0	525	Calibration	-	1308	13.1125	5632.34	0	?	0	525	Calibration	-	1308	13.1108	5025.16	0	?
1309	13.1214	10801.1	0	?	0	525	Calibration	-	1309	13.1231	19335.2	0	?	0	525	Calibration	-	1309	13.1208	7020.57	0	?	0	525	Calibration	-	1309	13.1208	6983.49	0	?	0	525	Calibration	-	1309	13.1225	5645.17	0	?	0	525	Calibration	-	1309	13.1208	5017.55	0	?
1310	13.1314	10770.3	0	?	0	525	Calibration	-	1310	13.1331	19378.7	0	?	0	525	Calibration	-	1310	13.1308	7008.48	0	?	0	525	Calibration	-	1310	13.1308	7011.15	0	?	0	525	Calibration	-	1310	13.1325	5652.51	0	?	0	525	Calibration	-	1310	13.1308	5039.37	0	?
1311	13.1414	10818	0	?	0	525	Calibration	-	1311	13.1431	19465.8	0	?	0	525	Calibration	-	1311	13.1408	7012.59	0	?	0	525	Calibration	-	1311	13.1408	6992.9	0	?	0	525	Calibration	-	1311	13.1425	5642.43	0	?	0	525	Calibration	-	1311	13.1408	5019.56	0	?
1312	13.1514	10818.8	0	?	0	525	Calibration	-	1312	13.1531	19486.6	0	?	0	525	Calibration	-	1312	13.1508	7014.87	0	?	0	525	Calibration	-	1312	13.1508	6983.14	0	?	0	525	Calibration	-	1312	13.1526	5662.24	0	?	0	525	Calibration	-	1312	13.1508	5040.03	0	?
1313	13.1614	10820	0	?	0	525	Calibration	-	1313	13.1632	19418.4	0	?	0	525	Calibration	-	1313	13.1608	7012.83	0	?	0	525	Calibration	-	1313	13.1608	6987.79	0	?	0	525	Calibration	-	1313	13.1626	5670.64	0	?	0	525	Calibration	-	1313	13.1608	5044.64	0	?
1314	13.1714	10734.1	0	?	0	525	Calibration	-	1314	13.1732	19340.1	0	?	0	525	Calibration	-	1314	13.1709	7043.9	0	?	0	525	Calibration	-	1314	13.1709	6972.18	0	?	0	525	Calibration	-	1314	13.1726	5651.28	0	?	0	525	Calibration	-	1314	13.1709	5012.92	0	?
1315	13.1815	10678.3	0	?	0	525	Calibration	-	1315	13.1832	19330.1	0	?	0	525	Calibration	-	1315	13.1809	7024.33	0	?	0	525	Calibration	-	1315	13.1809	6978.7	0	?	0	525	Calibration	-	1315	13.1826	5655.74	0	?	0	525	Calibration	-	1315	13.1809	5013.99	0	?
1316	13.1915	10723.7	0	?	0	525	Calibration	-	1316	13.1932	19322.3	0	?	0	525	Calibration	-	1316	13.1909	7038.16	0	?	0	525	Calibration	-	1316	13.1909	6967.9	0	?	0	525	Calibration	-	1316	13.1926	5653.71	0	?	0	525	Calibration	-	1316	13.1909	5037.73	0	?
1317	13.2015	10818.7	0	?	0	525	Calibration	-	1317	13.2032	19282.6	0	?	0	525	Calibration	-	1317	13.2009	7036.88	0	?	0	525	Calibration	-	1317	13.2009	6983.3	0	?	0	525	Calibration	-	1317	13.2026	5620.79	0	?	0	525	Calibration	-	1317	13.2009	5036.91	0	?
1318	13.2115	10868	0	?	0	525	Calibration	-	1318	13.2132	19268.6	0	?	0	525	Calibration	-	1318	13.2109	7019.3	0	?	0	525	Calibration	-	1318	13.2109	7003.81	0	?	0	525	Calibration	-	1318	13.2127	5638.97	0	?	0	525	Calibration	-	1318	13.2109	5035.83	0	?
1319	13.2215	10874.8	0	?	0	525	Calibration	-	1319	13.2233	19314.7	0	?	0	525	Calibration	-	1319	13.2209	7013.04	0	?	0	525	Calibration	-	1319	13.2209	7003.39	0	?	0	525	Calibration	-	1319	13.2227	5659.39	0	?	0	525	Calibration	-	1319	13.2209	5037.51	0	?
1320	13.2315	10825.8	0	?	0	525	Calibration	-	1320	13.2333	19356.3	0	?	0	525	Calibration	-	1320	13.2309	7044.32	0	?	0	525	Calibration	-	1320	13.2309	7008.61	0	?	0	525	Calibration	-	1320	13.2327	5653.98	0	?	0	525	Calibration	-	1320	13.2309	5046.9	0	?
1321	13.2415	10770.4	0	?	0	525	Calibration	-	1321	13.2433	19316.6	0	?	0	525	Calibration	-	1321	13.241	7003.7	0	?	0	525	Calibration	-	1321	13.241	6973.8	0	?	0	525	Calibration	-	1321	13.2427	5638.68	0	?	0	525	Calibration	-	1321	13.241	5029.28	0	?
1322	13.2516	10734	0	?	0	525	Calibration	-	1322	13.2533	19281	0	?	0	525	Calibration	-	1322	13.251	7014.36	0	?	0	525	Calibration	-	1322	13.251	6982.42	0	?	0	525	Calibration	-	1322	13.2527	5655.83	0	?	0	525	Calibration	-	1322	13.251	5065.18	0	?
1323	13.2616	10745.5	0	?	0	525	Calibration	-	1323	13.2633	19262.2	0	?	0	525	Calibration	-	1323	13.261	7009.62	0	?	0	525	Calibration	-	1323	13.261	6958.59	0	?	0	525	Calibration	-	1323	13.2627	5645.42	0	?	0	525	Calibration	-	1323	13.261	5045.44	0	?
1324	13.2716	10711.1	0	?	0	525	Calibration	-	1324	13.2733	19333.8	0	?	0	525	Calibration	-	1324	13.271	7014.68	0	?	0	525	Calibration	-	1324	13.271	6968.24	0	?	0	525	Calibration	-	1324	13.2728	5642.12	0	?	0	525	Calibration	-	1324	13.271	5047.02	0	?
1325	13.2816	10590.8	0	?	0	525	Calibration	-	1325	13.2834	19377.4	0	?	0	525	Calibration	-	1325	13.281	7020.61	0	?	0	525	Calibration	-	1325	13.281	6976.4	0	?	0	525	Calibration	-	1325	13.2828	5661.02	0	?	0	525	Calibration	-	1325	13.281	5045.91	0	?
1326	13.2916	10481.6	0	?	0	525	Calibration	-	1326	13.2934	19494.7	0	?	0	525	Calibration	-	1326	13.291	7019.08	0	?	0	525	Calibration	-	1326	13.291	6973.15	0	?	0	525	Calibration	-	1326	13.2928	5663.54	0	?	0	525	Calibration	-	1326	13.291	5039.81	0	?
1327	13.3016	10496.5	0	?	0	525	Calibration	-	1327	13.3034	19594.3	0	?	0	525	Calibration	-	1327	13.3011	7011.29	0	?	0	525	Calibration	-	1327	13.3011	6948.92	0	?	0	525	Calibration	-	1327	13.3028	5670.13	0	?	0	525	Calibration	-	1327	13.3011	5056.2	0	?
1328	13.3117	10522.6	0	?	0	525	Calibration	-	1328	13.3134	19754.2	0	?	0	525	Calibration	-	1328	13.3111	7013.12	0	?	0	525	Calibration	-	1328	13.3111	6946.39	0	?	0	525	Calibration	-	1328	13.3128	5655.74	0	?	0	525	Calibration	-	1328	13.3111	5038.34	0	?
1329	13.3217	10549.1	0	?	0	525	Calibration	-	1329	13.3234	19688.3	0	?	0	525	Calibration	-	1329	13.3211	7018.28	0	?	0	525	Calibration	-	1329	13.3211	6944.06	0	?	0	525	Calibration	-	1329	13.3229	5653	0	?	0	525	Calibration	-	1329	13.3211	5031.95	0	?
1330	13.3317	10643.4	0	?	0	525	Calibration	-	1330	13.3335	19598.9	0	?	0	525	Calibration	-	1330	13.3311	7014.53	0	?	0	525	Calibration	-	1330	13.3311	6939.33	0	?	0	525	Calibration	-	1330	13.3329	5640.44	0	?	0	525	Calibration	-	1330	13.3311	5025.15	0	?
1331	13.3417	10655.7	0	?	0	525	Calibration	-	1331	13.3435	19480.7	0	?	0	525	Calibration	-	1331	13.3411	7025.56	0	?	0	525	Calibration	-	1331	13.3411	6944.25	0	?	0	525	Calibration	-	1331	13.3429	5636.34	0	?	0	525	Calibration	-	1331	13.3411	5018.42	0	?
1332	13.3517	10565.1	0	?	0	525	Calibration	-	1332	13.3535	19423.2	0	?	0	525	Calibration	-	1332	13.3511	7012.32	0	?	0	525	Calibration	-	1332	13.3511	6945.23	0	?	0	525	Calibration	-	1332	13.3529	5615.63	0	?	0	525	Calibration	-	1332	13.3511	5017.56	0	?
1333	13.3617	10533.3	0	?	0	525	Calibration	-	1333	13.3635	19324.7	0	?	0	525	Calibration	-	1333	13.3612	7016.31	0	?	0	525	Calibration	-	1333	13.3612	6952.36	0	?	0	525	Calibration	-	1333	13.3629	5625.94	0	?	0	525	Calibration	-	1333	13.3612	5027.88	0	?
1334	13.3718	10482.9	0	?	0	525	Calibration	-	1334	13.3735	19263.8	0	?	0	525	Calibration	-	1334	13.3712	7012.6	0	?	0	525	Calibration	-	1334	13.3712	6969.23	0	?	0	525	Calibration	-	1334	13.3729	5625.23	0	?	0	525	Calibration	-	1334	13.3712	5015.67	0	?
1335	13.3818	10458.8	0	?	0	525	Calibration	-	1335	13.3835	19326.2	0	?	0	525	Calibration	-	1335	13.3812	7003.59	0	?	0	525	Calibration	-	1335	13.3812	6956.09	0	?	0	525	Calibration	-	1335	13.383	5637.07	0	?	0	525	Calibration	-	1335	13.3812	5036.16	0	?
1336	13.3918	10511.4	0	?	0	525	Calibration	-	1336	13.3936	19386.1	0	?	0	525	Calibration	-	1336	13.3912	7011.73	0	?	0	525	Calibration	-	1336	13.3912	6958.91	0	?	0	525	Calibration	-	1336	13.393	5628.02	0	?	0	525	Calibration	-	1336	13.3912	5035.19	0	?
1337	13.4018	10581.2	0	?	0	525	Calibration	-	1337	13.4036	19428	0	?	0	525	Calibration	-	1337	13.4012	7031.21	0	?	0	525	Calibration	-	1337	13.4012	6971.19	0	?	0	525	Calibration	-	1337	13.403	5637.91	0	?	0	525	Calibration	-	1337	13.4012	5038.48	0	?
1338	13.4118	10643.1	0	?	0	525	Calibration	-	1338	13.4136	19492.4	0	?	0	525	Calibration	-	1338	13.4112	7010.11	0	?	0	525	Calibration	-	1338	13.4112	6957.11	0	?	0	525	Calibration	-	1338	13.413	5632.07	0	?	0	525	Calibration	-	1338	13.4112	5030.68	0	?
1339	13.4218	10631.8	0	?	0	525	Calibration	-	1339	13.4236	19587.9	0	?	0	525	Calibration	-	1339	13.4213	7005.9	0	?	0	525	Calibration	-	1339	13.4213	6960.76	0	?	0	525	Calibration	-	1339	13.423	5638.16	0	?	0	525	Calibration	-	1339	13.4213	5021.64	0	?
1340	13.4319	10666.9	0	?	0	525	Calibration	-	1340	13.4336	19604.6	0	?	0	525	Calibration	-	1340	13.4313	7011.67	0	?	0	525	Calibration	-	1340	13.4313	6963.7	0	?	0	525	Calibration	-	1340	13.433	5624.65	0	?	0	525	Calibration	-	1340	13.4313	5013.45	0	?
1341	13.4419	10739.6	0	?	0	525	Calibration	-	1341	13.4436	19600.7	0	?	0	525	Calibration	-	1341	13.4413	7019.95	0	?	0	525	Calibration	-	1341	13.4413	6969.02	0	?	0	525	Calibration	-	1341	13.4431	5636.16	0	?	0	525	Calibration	-	1341	13.4413	5026.05	0	?
1342	13.4519	10918.5	0	?	0	525	Calibration	-	1342	13.4537	19521.7	0	?	0	525	Calibration	-	1342	13.4513	7030.84	0	?	0	525	Calibration	-	1342	13.4513	6960.6	0	?	0	525	Calibration	-	1342	13.4531	5612.24	0	?	0	525	Calibration	-	1342	13.4513	5019.79	0	?
1343	13.4619	10960.6	0	?	0	525	Calibration	-	1343	13.4637	19389.9	0	?	0	525	Calibration	-	1343	13.4613	7019.15	0	?	0	525	Calibration	-	1343	13.4613	6965.61	0	?	0	525	Calibration	-	1343	13.4631	5630.79	0	?	0	525	Calibration	-	1343	13.4613	5028.29	0	?
1344	13.4719	10946	0	?	0	525	Calibration	-	1344	13.4737	19378.3	0	?	0	525	Calibration	-	1344	13.4713	7018.73	0	?	0	525	Calibration	-	1344	13.4713	6955.54	0	?	0	525	Calibration	-	1344	13.4731	5641.1	0	?	0	525	Calibration	-	1344	13.4713	5005.27	0	?
1345	13.4819	10802.5	0	?	0	525	Calibration	-	1345	13.4837	19363.3	0	?	0	525	Calibration	-	1345	13.4813	6995.2	0	?	0	525	Calibration	-	1345	13.4813	6957.01	0	?	0	525	Calibration	-	1345	13.4831	5635.26	0	?	0	525	Calibration	-	1345	13.4813	5033.64	0	?
1346	13.492	10759.8	0	?	0	525	Calibration	-	1346	13.4937	19369.2	0	?	0	525	Calibration	-	1346	13.4914	6993.59	0	?	0	525	Calibration	-	1346	13.4914	6962.83	0	?	0	525	Calibration	-	1346	13.4931	5606.78	0	?	0	525	Calibration	-	1346	13.4914	5039.44	0	?
1347	13.502	10767.6	0	?	0	525	Calibration	-	1347	13.5038	19366.7	0	?	0	525	Calibration	-	1347	13.5014	7011.51	0	?	0	525	Calibration	-	1347	13.5014	6950.79	0	?	0	525	Calibration	-	1347	13.5032	5622.81	0	?	0	525	Calibration	-	1347	13.5014	5012.27	0	?
1348	13.512	10799.5	0	?	0	525	Calibration	-	1348	13.5138	19368.1	0	?	0	525	Calibration	-	1348	13.5114	7011.46	0	?	0	525	Calibration	-	1348	13.5114	6938.27	0	?	0	525	Calibration	-	1348	13.5132	5611.51	0	?	0	525	Calibration	-	1348	13.5114	5038.77	0	?
1349	13.522	10860.8	0	?	0	525	Calibration	-	1349	13.5238	19301.5	0	?	0	525	Calibration	-	1349	13.5214	7017.45	0	?	0	525	Calibration	-	1349	13.5214	6961.19	0	?	0	525	Calibration	-	1349	13.5232	5633.68	0	?	0	525	Calibration	-	1349	13.5214	5028.7	0	?
1350	13.532	10957.6	0	?	0	525	Calibration	-	1350	13.5338	19330.8	0	?	0	525	Calibration	-	1350	13.5314	7021.23	0	?	0	525	Calibration	-	1350	13.5314	6959.98	0	?	0	525	Calibration	-	1350	13.5332	5641.09	0	?	0	525	Calibration	-	1350	13.5314	5005.41	0	?
1351	13.542	10823.6	0	?	0	525	Calibration	-	1351	13.5438	19401.1	0	?	0	525	Calibration	-	1351	13.5414	7009.46	0	?	0	525	Calibration	-	1351	13.5414	6951.91	0	?	0	525	Calibration	-	1351	13.5432	5631.08	0	?	0	525	Calibration	-	1351	13.5414	5029.35	0	?
1352	13.5521	10652	0	?	0	525	Calibration	-	1352	13.5538	19527.2	0	?	0	525	Calibration	-	1352	13.5515	7023.83	0	?	0	525	Calibration	-	1352	13.5515	6949.02	0	?	0	525	Calibration	-	1352	13.5532	5634.81	0	?	0	525	Calibration	-	1352	13.5515	5033.47	0	?
1353	13.5621	10565.3	0	?	0	525	Calibration	-	1353	13.5639	19531.5	0	?	0	525	Calibration	-	1353	13.5615	7017.22	0	?	0	525	Calibration	-	1353	13.5615	6951.81	0	?	0	525	Calibration	-	1353	13.5633	5628.66	0	?	0	525	Calibration	-	1353	13.5615	5029.62	0	?
1354	13.5721	10478.9	0	?	0	525	Calibration	-	1354	13.5739	19562.5	0	?	0	525	Calibration	-	1354	13.5715	7022.18	0	?	0	525	Calibration	-	1354	13.5715	6954.87	0	?	0	525	Calibration	-	1354	13.5733	5621.74	0	?	0	525	Calibration	-	1354	13.5715	5023.51	0	?
1355	13.5821	10578.3	0	?	0	525	Calibration	-	1355	13.5839	19518.7	0	?	0	525	Calibration	-	1355	13.5815	7018.21	0	?	0	525	Calibration	-	1355	13.5815	6946.95	0	?	0	525	Calibration	-	1355	13.5833	5626.67	0	?	0	525	Calibration	-	1355	13.5815	5037.36	0	?
1356	13.5921	10628.5	0	?	0	525	Calibration	-	1356	13.5939	19457.4	0	?	0	525	Calibration	-	1356	13.5915	7002.69	0	?	0	525	Calibration	-	1356	13.5915	6967.86	0	?	0	525	Calibration	-	1356	13.5933	5628.28	0	?	0	525	Calibration	-	1356	13.5915	5018.34	0	?
1357	13.6021	10674.4	0	?	0	525	Calibration	-	1357	13.6039	19406	0	?	0	525	Calibration	-	1357	13.6015	7020.26	0	?	0	525	Calibration	-	1357	13.6015	6970.4	0	?	0	525	Calibration	-	1357	13.6033	5629.76	0	?	0	525	Calibration	-	1357	13.6015	5017.31	0	?
1358	13.6122	10789.6	0	?	0	525	Calibration	-	1358	13.6139	19416.3	0	?	0	525	Calibration	-	1358	13.6116	7002.53	0	?	0	525	Calibration	-	1358	13.6116	6970.2	0	?	0	525	Calibration	-	1358	13.6133	5621.18	0	?	0	525	Calibration	-	1358	13.6116	5030.07	0	?
1359	13.6222	10751.5	0	?	0	525	Calibration	-	1359	13.624	19440.3	0	?	0	525	Calibration	-	1359	13.6216	6990.29	0	?	0	525	Calibration	-	1359	13.6216	6992.58	0	?	0	525	Calibration	-	1359	13.6234	5623.34	0	?	0	525	Calibration	-	1359	13.6216	5017.48	0	?
1360	13.6322	10741	0	?	0	525	Calibration	-	1360	13.634	19379.4	0	?	0	525	Calibration	-	1360	13.6316	7001.71	0	?	0	525	Calibration	-	1360	13.6316	6972.23	0	?	0	525	Calibration	-	1360	13.6334	5632.94	0	?	0	525	Calibration	-	1360	13.6316	5035.65	0	?
1361	13.6422	10690.2	0	?	0	525	Calibration	-	1361	13.644	19307.3	0	?	0	525	Calibration	-	1361	13.6416	6994.17	0	?	0	525	Calibration	-	1361	13.6416	6963.15	0	?	0	525	Calibration	-	1361	13.6434	5616.84	0	?	0	525	Calibration	-	1361	13.6416	5018.44	0	?
1362	13.6522	10679.5	0	?	0	525	Calibration	-	1362	13.654	19341.4	0	?	0	525	Calibration	-	1362	13.6516	7000.12	0	?	0	525	Calibration	-	1362	13.6516	6961.46	0	?	0	525	Calibration	-	1362	13.6534	5616.23	0	?	0	525	Calibration	-	1362	13.6516	5024.77	0	?
1363	13.6622	10688.5	0	?	0	525	Calibration	-	1363	13.664	19353.8	0	?	0	525	Calibration	-	1363	13.6616	7003.53	0	?	0	525	Calibration	-	1363	13.6616	6950.8	0	?	0	525	Calibration	-	1363	13.6634	5610.66	0	?	0	525	Calibration	-	1363	13.6616	5038.85	0	?
1364	13.6722	10622.9	0	?	0	525	Calibration	-	1364	13.6741	19320	0	?	0	525	Calibration	-	1364	13.6716	7014.76	0	?	0	525	Calibration	-	1364	13.6716	6963.26	0	?	0	525	Calibration	-	1364	13.6735	5621.97	0	?	0	525	Calibration	-	1364	13.6716	5020.36	0	?
1365	13.6823	10636.2	0	?	0	525	Calibration	-	1365	13.6841	19302.3	0	?	0	525	Calibration	-	1365	13.6817	7016.91	0	?	0	525	Calibration	-	1365	13.6817	6960.62	0	?	0	525	Calibration	-	1365	13.6835	5616.24	0	?	0	525	Calibration	-	1365	13.6817	5026.57	0	?
1366	13.6923	10662	0	?	0	525	Calibration	-	1366	13.6941	19277.3	0	?	0	525	Calibration	-	1366	13.6917	7013.38	0	?	0	525	Calibration	-	1366	13.6917	6963.81	0	?	0	525	Calibration	-	1366	13.6935	5631.18	0	?	0	525	Calibration	-	1366	13.6917	5030.56	0	?
1367	13.7023	10630	0	?	0	525	Calibration	-	1367	13.7041	19314.7	0	?	0	525	Calibration	-	1367	13.7017	7005.55	0	?	0	525	Calibration	-	1367	13.7017	6954.08	0	?	0	525	Calibration	-	1367	13.7035	5623.24	0	?	0	525	Calibration	-	1367	13.7017	5035.99	0	?
1368	13.7123	10526.5	0	?	0	525	Calibration	-	1368	13.7141	19296	0	?	0	525	Calibration	-	1368	13.7117	7012.56	0	?	0	525	Calibration	-	1368	13.7117	6967.97	0	?	0	525	Calibration	-	1368	13.7135	5651.58	0	?	0	525	Calibration	-	1368	13.7117	5042.91	0	?
1369	13.7223	10518.9	0	?	0	525	Calibration	-	1369	13.7241	19284.1	0	?	0	525	Calibration	-	1369	13.7217	7009.36	0	?	0	525	Calibration	-	1369	13.7217	6945.45	0	?	0	525	Calibration	-	1369	13.7235	5639.77	0	?	0	525	Calibration	-	1369	13.7217	5011.16	0	?
1370	13.7323	10502.7	0	?	0	525	Calibration	-	1370	13.7342	19347.1	0	?	0	525	Calibration	-	1370	13.7317	7027.74	0	?	0	525	Calibration	-	1370	13.7317	6951.77	0	?	0	525	Calibration	-	1370	13.7336	5640.49	0	?	0	525	Calibration	-	1370	13.7317	5016.48	0	?
1371	13.7424	10536.5	0	?	0	525	Calibration	-	1371	13.7442	19372.8	0	?	0	525	Calibration	-	1371	13.7418	7021.83	0	?	0	525	Calibration	-	1371	13.7418	6936.87	0	?	0	525	Calibration	-	1371	13.7436	5623.84	0	?	0	525	Calibration	-	1371	13.7418	5020.36	0	?
1372	13.7524	10525.9	0	?	0	525	Calibration	-	1372	13.7542	19443.5	0	?	0	525	Calibration	-	1372	13.7518	7018.44	0	?	0	525	Calibration	-	1372	13.7518	6935.25	0	?	0	525	Calibration	-	1372	13.7536	5620.67	0	?	0	525	Calibration	-	1372	13.7518	5043.53	0	?
1373	13.7624	10510	0	?	0	525	Calibration	-	1373	13.7642	19405.6	0	?	0	525	Calibration	-	1373	13.7618	7012.39	0	?	0	525	Calibration	-	1373	13.7618	6939.36	0	?	0	525	Calibration	-	1373	13.7636	5620.83	0	?	0	525	Calibration	-	1373	13.7618	5013.99	0	?
1374	13.7724	10528.2	0	?	0	525	Calibration	-	1374	13.7742	19408.2	0	?	0	525	Calibration	-	1374	13.7718	7001.34	0	?	0	525	Calibration	-	1374	13.7718	6941.6	0	?	0	525	Calibration	-	1374	13.7736	5604.59	0	?	0	525	Calibration	-	1374	13.7718	5026.69	0	?
1375	13.7824	10455.5	0	?	0	525	Calibration	-	1375	13.7842	19300	0	?	0	525	Calibration	-	1375	13.7818	7009.5	0	?	0	525	Calibration	-	1375	13.7818	6929.22	0	?	0	525	Calibration	-	1375	13.7836	5617.05	0	?	0	525	Calibration	-	1375	13.7818	5024.47	0	?
1376	13.7924	10386.3	0	?	0	525	Calibration	-	1376	13.7943	19317.7	0	?	0	525	Calibration	-	1376	13.7918	7005.06	0	?	0	525	Calibration	-	1376	13.7918	6937.38	0	?	0	525	Calibration	-	1376	13.7937	5610.18	0	?	0	525	Calibration	-	1376	13.7918	5020.26	0	?
1377	13.8025	10364.1	0	?	0	525	Calibration	-	1377	13.8043	19373.3	0	?	0	525	Calibration	-	1377	13.8019	7007.5	0	?	0	525	Calibration	-	1377	13.8019	6941.39	0	?	0	525	Calibration	-	1377	13.8037	5622.22	0	?	0	525	Calibration	-	1377	13.8019	5013.42	0	?
1378	13.8125	10381.3	0	?	0	525	Calibration	-	1378	13.8143	19435.5	0	?	0	525	Calibration	-	1378	13.8119	7008.42	0	?	0	525	Calibration	-	1378	13.8119	6947.16	0	?	0	525	Calibration	-	1378	13.8137	5597.16	0	?	0	525	Calibration	-	1378	13.8119	5002.82	0	?
1379	13.8225	10472.2	0	?	0	525	Calibration	-	1379	13.8243	19537.9	0	?	0	525	Calibration	-	1379	13.8219	7024.57	0	?	0	525	Calibration	-	1379	13.8219	6963.51	0	?	0	525	Calibration	-	1379	13.8237	5624.35	0	?	0	525	Calibration	-	1379	13.8219	5003.18	0	?
1380	13.8325	10409.9	0	?	0	525	Calibration	-	1380	13.8343	19580.3	0	?	0	525	Calibration	-	1380	13.8319	7035.89	0	?	0	525	Calibration	-	1380	13.8319	6963.12	0	?	0	525	Calibration	-	1380	13.8337	5619.25	0	?	0	525	Calibration	-	1380	13.8319	5013.38	0	?
1381	13.8425	10385.5	0	?	0	525	Calibration	-	1381	13.8444	19618.9	0	?	0	525	Calibration	-	1381	13.8419	7009.3	0	?	0	525	Calibration	-	1381	13.8419	6965.02	0	?	0	525	Calibration	-	1381	13.8437	5609.47	0	?	0	525	Calibration	-	1381	13.8419	5019.2	0	?
1382	13.8525	10327.9	0	?	0	525	Calibration	-	1382	13.8544	19645.8	0	?	0	525	Calibration	-	1382	13.8519	7003.47	0	?	0	525	Calibration	-	1382	13.8519	6973.36	0	?	0	525	Calibration	-	1382	13.8538	5617.14	0	?	0	525	Calibration	-	1382	13.8519	5007.33	0	?
1383	13.8626	10368.4	0	?	0	525	Calibration	-	1383	13.8644	19657.4	0	?	0	525	Calibration	-	1383	13.8619	7015.75	0	?	0	525	Calibration	-	1383	13.8619	6971.45	0	?	0	525	Calibration	-	1383	13.8638	5626.53	0	?	0	525	Calibration	-	1383	13.8619	5023.56	0	?
1384	13.8726	10289.5	0	?	0	525	Calibration	-	1384	13.8744	19589.3	0	?	0	525	Calibration	-	1384	13.872	7022.18	0	?	0	525	Calibration	-	1384	13.872	6964.47	0	?	0	525	Calibration	-	1384	13.8738	5637.73	0	?	0	525	Calibration	-	1384	13.872	5033.25	0	?
1385	13.8826	10243.9	0	?	0	525	Calibration	-	1385	13.8844	19585.3	0	?	0	525	Calibration	-	1385	13.882	7018.52	0	?	0	525	Calibration	-	1385	13.882	6953.54	0	?	0	525	Calibration	-	1385	13.8838	5629.34	0	?	0	525	Calibration	-	1385	13.882	5017.4	0	?
1386	13.8926	10253	0	?	0	525	Calibration	-	1386	13.8944	19509.8	0	?	0	525	Calibration	-	1386	13.892	7015.61	0	?	0	525	Calibration	-	1386	13.892	6938.45	0	?	0	525	Calibration	-	1386	13.8938	5622.29	0	?	0	525	Calibration	-	1386	13.892	5002.12	0	?
1387	13.9026	10274.5	0	?	0	525	Calibration	-	1387	13.9045	19416.9	0	?	0	525	Calibration	-	1387	13.902	7007.92	0	?	0	525	Calibration	-	1387	13.902	6936.91	0	?	0	525	Calibration	-	1387	13.9038	5629.42	0	?	0	525	Calibration	-	1387	13.902	5013.88	0	?
1388	13.9126	10218.4	0	?	0	525	Calibration	-	1388	13.9145	19444.5	0	?	0	525	Calibration	-	1388	13.912	6999.32	0	?	0	525	Calibration	-	1388	13.912	6945.71	0	?	0	525	Calibration	-	1388	13.9139	5618.59	0	?	0	525	Calibration	-	1388	13.912	5010.3	0	?
1389	13.9227	10210.4	0	?	0	525	Calibration	-	1389	13.9245	19428.8	0	?	0	525	Calibration	-	1389	13.922	7014.16	0	?	0	525	Calibration	-	1389	13.922	6939.82	0	?	0	525	Calibration	-	1389	13.9239	5621.05	0	?	0	525	Calibration	-	1389	13.922	5026.46	0	?
1390	13.9327	10250.2	0	?	0	525	Calibration	-	1390	13.9345	19400.7	0	?	0	525	Calibration	-	1390	13.9321	7006.36	0	?	0	525	Calibration	-	1390	13.9321	6932.03	0	?	0	525	Calibration	-	1390	13.9339	5626.47	0	?	0	525	Calibration	-	1390	13.9321	5010.27	0	?
1391	13.9427	10342.4	0	?	0	525	Calibration	-	1391	13.9445	19360.9	0	?	0	525	Calibration	-	1391	13.9421	7031.47	0	?	0	525	Calibration	-	1391	13.9421	6931.24	0	?	0	525	Calibration	-	1391	13.9439	5628.88	0	?	0	525	Calibration	-	1391	13.9421	5010.2	0	?
1392	13.9527	10482.8	0	?	0	525	Calibration	-	1392	13.9545	19416.5	0	?	0	525	Calibration	-	1392	13.9521	7031.21	0	?	0	525	Calibration	-	1392	13.9521	6927.44	0	?	0	525	Calibration	-	1392	13.9539	5635.93	0	?	0	525	Calibration	-	1392	13.9521	5002.45	0	?
1393	13.9627	10583.4	0	?	0	525	Calibration	-	1393	13.9646	19388.8	0	?	0	525	Calibration	-	1393	13.9621	7022.58	0	?	0	525	Calibration	-	1393	13.9621	6928.46	0	?	0	525	Calibration	-	1393	13.9639	5621.91	0	?	0	525	Calibration	-	1393	13.9621	5030.08	0	?
1394	13.9727	10690.2	0	?	0	525	Calibration	-	1394	13.9746	19301.6	0	?	0	525	Calibration	-	1394	13.9721	7007.98	0	?	0	525	Calibration	-	1394	13.9721	6931.24	0	?	0	525	Calibration	-	1394	13.974	5620.54	0	?	0	525	Calibration	-	1394	13.9721	5027.41	0	?
1395	13.9828	10715.4	0	?	0	525	Calibration	-	1395	13.9846	19343.7	0	?	0	525	Calibration	-	1395	13.9821	7018.85	0	?	0	525	Calibration	-	1395	13.9821	6928.11	0	?	0	525	Calibration	-	1395	13.984	5629.37	0	?	0	525	Calibration	-	1395	13.9821	5017.12	0	?
1396	13.9928	10820.3	0	?	0	525	Calibration	-	1396	13.9946	19324.8	0	?	0	525	Calibration	-	1396	13.9922	7029.89	0	?	0	525	Calibration	-	1396	13.9922	6904.66	0	?	0	525	Calibration	-	1396	13.994	5639.26	0	?	0	525	Calibration	-	1396	13.9922	5013.37	0	?
1397	14.0028	10814.6	0	?	0	525	Calibration	-	1397	14.0046	19371.2	0	?	0	525	Calibration	-	1397	14.0022	7024.25	0	?	0	525	Calibration	-	1397	14.0022	6916.12	0	?	0	525	Calibration	-	1397	14.004	5633.82	0	?	0	525	Calibration	-	1397	14.0022	5022.35	0	?
1398	14.0128	10857.1	0	?	0	525	Calibration	-	1398	14.0147	19343.8	0	?	0	525	Calibration	-	1398	14.0122	7022.21	0	?	0	525	Calibration	-	1398	14.0122	6925.52	0	?	0	525	Calibration	-	1398	14.014	5629.95	0	?	0	525	Calibration	-	1398	14.0122	5015.91	0	?
1399	14.0228	10793.8	0	?	0	525	Calibration	-	1399	14.0247	19347.5	0	?	0	525	Calibration	-	1399	14.0222	7022.99	0	?	0	525	Calibration	-	1399	14.0222	6932.77	0	?	0	525	Calibration	-	1399	14.0241	5644.52	0	?	0	525	Calibration	-	1399	14.0222	5034.28	0	?
1400	14.0328	10621.8	0	?	0	525	Calibration	-	1400	14.0347	19365.9	0	?	0	525	Calibration	-	1400	14.0322	7012.02	0	?	0	525	Calibration	-	1400	14.0322	6915.35	0	?	0	525	Calibration	-	1400	14.0341	5636.47	0	?	0	525	Calibration	-	1400	14.0322	5007.64	0	?
1401	14.0429	10546.9	0	?	0	525	Calibration	-	1401	14.0447	19308.8	0	?	0	525	Calibration	-	1401	14.0422	7001.66	0	?	0	525	Calibration	-	1401	14.0422	6927.83	0	?	0	525	Calibration	-	1401	14.0441	5642.81	0	?	0	525	Calibration	-	1401	14.0422	5028.66	0	?
1402	14.0529	10554.7	0	?	0	525	Calibration	-	1402	14.0547	19319.8	0	?	0	525	Calibration	-	1402	14.0523	7022.32	0	?	0	525	Calibration	-	1402	14.0523	6912.6	0	?	0	525	Calibration	-	1402	14.0541	5628.64	0	?	0	525	Calibration	-	1402	14.0523	5011.52	0	?
1403	14.0629	10502.2	0	?	0	525	Calibration	-	1403	14.0647	19280.3	0	?	0	525	Calibration	-	1403	14.0623	7004.56	0	?	0	525	Calibration	-	1403	14.0623	6925.77	0	?	0	525	Calibration	-	1403	14.0641	5635.43	0	?	0	525	Calibration	-	1403	14.0623	5024.82	0	?
1404	14.0729	10468.7	0	?	0	525	Calibration	-	1404	14.0748	19287.2	0	?	0	525	Calibration	-	1404	14.0723	7017.66	0	?	0	525	Calibration	-	1404	14.0723	6939.74	0	?	0	525	Calibration	-	1404	14.0741	5632.57	0	?	0	525	Calibration	-	1404	14.0723	5022.83	0	?
1405	14.0829	10488.6	0	?	0	525	Calibration	-	1405	14.0848	19306.2	0	?	0	525	Calibration	-	1405	14.0823	7011.9	0	?	0	525	Calibration	-	1405	14.0823	6934.91	0	?	0	525	Calibration	-	1405	14.0842	5639.94	0	?	0	525	Calibration	-	1405	14.0823	5008.46	0	?
1406	14.0929	10553.2	0	?	0	525	Calibration	-	1406	14.0948	19352.5	0	?	0	525	Calibration	-	1406	14.0923	7016.47	0	?	0	525	Calibration	-	1406	14.0923	6948.45	0	?	0	525	Calibration	-	1406	14.0942	5604.74	0	?	0	525	Calibration	-	1406	14.0923	4996.66	0	?
1407	14.1029	10560.8	0	?	0	525	Calibration	-	1407	14.1048	19364.8	0	?	0	525	Calibration	-	1407	14.1023	7029.48	0	?	0	525	Calibration	-	1407	14.1023	6950.13	0	?	0	525	Calibration	-	1407	14.1042	5605.47	0	?	0	525	Calibration	-	1407	14.1023	5003.39	0	?
1408	14.113	10636.5	0	?	0	525	Calibration	-	1408	14.1148	19395.9	0	?	0	525	Calibration	-	1408	14.1123	7020.28	0	?	0	525	Calibration	-	1408	14.1123	6943.59	0	?	0	525	Calibration	-	1408	14.1142	5611.38	0	?	0	525	Calibration	-	1408	14.1123	5020.27	0	?
1409	14.123	10448.4	0	?	0	525	Calibration	-	1409	14.1248	19304.8	0	?	0	525	Calibration	-	1409	14.1224	7009.94	0	?	0	525	Calibration	-	1409	14.1224	6933.14	0	?	0	525	Calibration	-	1409	14.1242	5612.52	0	?	0	525	Calibration	-	1409	14.1224	5028.29	0	?
1410	14.133	10401.7	0	?	0	525	Calibration	-	1410	14.1349	19315.8	0	?	0	525	Calibration	-	1410	14.1324	7026.56	0	?	0	525	Calibration	-	1410	14.1324	6947.14	0	?	0	525	Calibration	-	1410	14.1342	5619.06	0	?	0	525	Calibration	-	1410	14.1324	5012.21	0	?
1411	14.143	10497.5	0	?	0	525	Calibration	-	1411	14.1449	19200.4	0	?	0	525	Calibration	-	1411	14.1424	7010.45	0	?	0	525	Calibration	-	1411	14.1424	6963.02	0	?	0	525	Calibration	-	1411	14.1443	5623.27	0	?	0	525	Calibration	-	1411	14.1424	5012.68	0	?
1412	14.153	10622.5	0	?	0	525	Calibration	-	1412	14.1549	19239.3	0	?	0	525	Calibration	-	1412	14.1524	7002.87	0	?	0	525	Calibration	-	1412	14.1524	6941.45	0	?	0	525	Calibration	-	1412	14.1543	5610.58	0	?	0	525	Calibration	-	1412	14.1524	5018.71	0	?
1413	14.163	10707.2	0	?	0	525	Calibration	-	1413	14.1649	19303.6	0	?	0	525	Calibration	-	1413	14.1624	7015.54	0	?	0	525	Calibration	-	1413	14.1624	6948.23	0	?	0	525	Calibration	-	1413	14.1643	5603.29	0	?	0	525	Calibration	-	1413	14.1624	5020.74	0	?
1414	14.1731	10755	0	?	0	525	Calibration	-	1414	14.1749	19388.1	0	?	0	525	Calibration	-	1414	14.1724	6996.96	0	?	0	525	Calibration	-	1414	14.1724	6967.36	0	?	0	525	Calibration	-	1414	14.1743	5622.32	0	?	0	525	Calibration	-	1414	14.1724	5014.71	0	?
1415	14.1831	10871.7	0	?	0	525	Calibration	-	1415	14.185	19453.2	0	?	0	525	Calibration	-	1415	14.1825	7006.39	0	?	0	525	Calibration	-	1415	14.1825	6967.04	0	?	0	525	Calibration	-	1415	14.1843	5629.68	0	?	0	525	Calibration	-	1415	14.1825	4992.11	0	?
1416	14.1931	10914.5	0	?	0	525	Calibration	-	1416	14.195	19536	0	?	0	525	Calibration	-	1416	14.1925	7020.52	0	?	0	525	Calibration	-	1416	14.1925	6985.03	0	?	0	525	Calibration	-	1416	14.1943	5622.58	0	?	0	525	Calibration	-	1416	14.1925	4999.74	0	?
1417	14.2031	10989.2	0	?	0	525	Calibration	-	1417	14.205	19527.5	0	?	0	525	Calibration	-	1417	14.2025	7027.18	0	?	0	525	Calibration	-	1417	14.2025	6958.44	0	?	0	525	Calibration	-	1417	14.2044	5635.49	0	?	0	525	Calibration	-	1417	14.2025	5005.62	0	?
1418	14.2131	10941.3	0	?	0	525	Calibration	-	1418	14.215	19465.5	0	?	0	525	Calibration	-	1418	14.2125	7023.12	0	?	0	525	Calibration	-	1418	14.2125	6950.76	0	?	0	525	Calibration	-	1418	14.2144	5629.18	0	?	0	525	Calibration	-	1418	14.2125	5013.53	0	?
1419	14.2231	10959.8	0	?	0	525	Calibration	-	1419	14.225	19395.4	0	?	0	525	Calibration	-	1419	14.2225	7015.65	0	?	0	525	Calibration	-	1419	14.2225	6944.17	0	?	0	525	Calibration	-	1419	14.2244	5621.06	0	?	0	525	Calibration	-	1419	14.2225	5004.62	0	?
1420	14.2332	10913.7	0	?	0	525	Calibration	-	1420	14.235	19284.2	0	?	0	525	Calibration	-	1420	14.2325	7010.95	0	?	0	525	Calibration	-	1420	14.2325	6950.38	0	?	0	525	Calibration	-	1420	14.2344	5633.11	0	?	0	525	Calibration	-	1420	14.2325	4998.54	0	?
1421	14.2432	10707.6	0	?	0	525	Calibration	-	1421	14.2451	19276.4	0	?	0	525	Calibration	-	1421	14.2426	7007.99	0	?	0	525	Calibration	-	1421	14.2426	6932.69	0	?	0	525	Calibration	-	1421	14.2444	5627.79	0	?	0	525	Calibration	-	1421	14.2426	5011.19	0	?
1422	14.2532	10709.5	0	?	0	525	Calibration	-	1422	14.2551	19289	0	?	0	525	Calibration	-	1422	14.2526	6998.24	0	?	0	525	Calibration	-	1422	14.2526	6934.67	0	?	0	525	Calibration	-	1422	14.2544	5605.27	0	?	0	525	Calibration	-	1422	14.2526	5015.72	0	?
1423	14.2632	10627.6	0	?	0	525	Calibration	-	1423	14.2651	19276.6	0	?	0	525	Calibration	-	1423	14.2626	7005.53	0	?	0	525	Calibration	-	1423	14.2626	6958.57	0	?	0	525	Calibration	-	1423	14.2645	5641.04	0	?	0	525	Calibration	-	1423	14.2626	5012.63	0	?
1424	14.2732	10495.5	0	?	0	525	Calibration	-	1424	14.2751	19272.1	0	?	0	525	Calibration	-	1424	14.2726	6995.23	0	?	0	525	Calibration	-	1424	14.2726	6948.09	0	?	0	525	Calibration	-	1424	14.2745	5609.15	0	?	0	525	Calibration	-	1424	14.2726	5013.52	0	?
1425	14.2832	10489.9	0	?	0	525	Calibration	-	1425	14.2851	19250.8	0	?	0	525	Calibration	-	1425	14.2826	6996.22	0	?	0	525	Calibration	-	1425	14.2826	6939.49	0	?	0	525	Calibration	-	1425	14.2845	5612.59	0	?	0	525	Calibration	-	1425	14.2826	5011.72	0	?
1426	14.2933	10375.6	0	?	0	525	Calibration	-	1426	14.2951	19217.2	0	?	0	525	Calibration	-	1426	14.2926	6990.13	0	?	0	525	Calibration	-	1426	14.2926	6942.51	0	?	0	525	Calibration	-	1426	14.2945	5595.75	0	?	0	525	Calibration	-	1426	14.2926	5009.51	0	?
1427	14.3033	10364.3	0	?	0	525	Calibration	-	1427	14.3052	19272.9	0	?	0	525	Calibration	-	1427	14.3026	6998.05	0	?	0	525	Calibration	-	1427	14.3026	6951.85	0	?	0	525	Calibration	-	1427	14.3045	5602.1	0	?	0	525	Calibration	-	1427	14.3026	5011.73	0	?
1428	14.3133	10365	0	?	0	525	Calibration	-	1428	14.3152	19363.3	0	?	0	525	Calibration	-	1428	14.3127	7002.34	0	?	0	525	Calibration	-	1428	14.3127	6964.64	0	?	0	525	Calibration	-	1428	14.3146	5597.71	0	?	0	525	Calibration	-	1428	14.3127	5003.67	0	?
1429	14.3233	10362.4	0	?	0	525	Calibration	-	1429	14.3252	19345.8	0	?	0	525	Calibration	-	1429	14.3227	6999.52	0	?	0	525	Calibration	-	1429	14.3227	6955.82	0	?	0	525	Calibration	-	1429	14.3246	5598.92	0	?	0	525	Calibration	-	1429	14.3227	5008.28	0	?
1430	14.3333	10397.6	0	?	0	525	Calibration	-	1430	14.3352	19336.4	0	?	0	525	Calibration	-	1430	14.3327	7009.18	0	?	0	525	Calibration	-	1430	14.3327	6942.94	0	?	0	525	Calibration	-	1430	14.3346	5612.37	0	?	0	525	Calibration	-	1430	14.3327	4987.13	0	?
1431	14.3433	10389.8	0	?	0	525	Calibration	-	1431	14.3452	19373.7	0	?	0	525	Calibration	-	1431	14.3427	7003.59	0	?	0	525	Calibration	-	1431	14.3427	6947.69	0	?	0	525	Calibration	-	1431	14.3446	5599.94	0	?	0	525	Calibration	-	1431	14.3427	5008.86	0	?
1432	14.3534	10360.6	0	?	0	525	Calibration	-	1432	14.3553	19411.2	0	?	0	525	Calibration	-	1432	14.3527	6998.01	0	?	0	525	Calibration	-	1432	14.3527	6939.38	0	?	0	525	Calibration	-	1432	14.3546	5594.11	0	?	0	525	Calibration	-	1432	14.3527	5016.68	0	?
1433	14.3634	10395.4	0	?	0	525	Calibration	-	1433	14.3653	19379.3	0	?	0	525	Calibration	-	1433	14.3627	6999.95	0	?	0	525	Calibration	-	1433	14.3627	6930.33	0	?	0	525	Calibration	-	1433	14.3646	5604.49	0	?	0	525	Calibration	-	1433	14.3627	5019.76	0	?
1434	14.3734	10414.1	0	?	0	525	Calibration	-	1434	14.3753	19328	0	?	0	525	Calibration	-	1434	14.3728	6987.52	0	?	0	525	Calibration	-	1434	14.3728	6951.46	0	?	0	525	Calibration	-	1434	14.3747	5601.04	0	?	0	525	Calibration	-	1434	14.3728	5007.64	0	?
1435	14.3834	10392.2	0	?	0	525	Calibration	-	1435	14.3853	19321.5	0	?	0	525	Calibration	-	1435	14.3828	6985.71	0	?	0	525	Calibration	-	1435	14.3828	6925.07	0	?	0	525	Calibration	-	1435	14.3847	5593.47	0	?	0	525	Calibration	-	1435	14.3828	5001.29	0	?
1436	14.3934	10278.6	0	?	0	525	Calibration	-	1436	14.3953	19284.5	0	?	0	525	Calibration	-	1436	14.3928	6998.81	0	?	0	525	Calibration	-	1436	14.3928	6930.2	0	?	0	525	Calibration	-	1436	14.3947	5596.67	0	?	0	525	Calibration	-	1436	14.3928	5013.1	0	?
1437	14.4034	10239.2	0	?	0	525	Calibration	-	1437	14.4053	19325.8	0	?	0	525	Calibration	-	1437	14.4028	6999.71	0	?	0	525	Calibration	-	1437	14.4028	6936	0	?	0	525	Calibration	-	1437	14.4047	5593.86	0	?	0	525	Calibration	-	1437	14.4028	5019.06	0	?
1438	14.4135	10222	0	?	0	525	Calibration	-	1438	14.4154	19373.6	0	?	0	525	Calibration	-	1438	14.4128	6997.8	0	?	0	525	Calibration	-	1438	14.4128	6936.3	0	?	0	525	Calibration	-	1438	14.4147	5607.17	0	?	0	525	Calibration	-	1438	14.4128	5020.96	0	?
1439	14.4235	10272.5	0	?	0	525	Calibration	-	1439	14.4254	19403.2	0	?	0	525	Calibration	-	1439	14.4228	7005.71	0	?	0	525	Calibration	-	1439	14.4228	6933.69	0	?	0	525	Calibration	-	1439	14.4247	5613	0	?	0	525	Calibration	-	1439	14.4228	5018.63	0	?
1440	14.4335	10306.4	0	?	0	525	Calibration	-	1440	14.4354	19427.9	0	?	0	525	Calibration	-	1440	14.4329	7004.5	0	?	0	525	Calibration	-	1440	14.4329	6942.48	0	?	0	525	Calibration	-	1440	14.4348	5597.73	0	?	0	525	Calibration	-	1440	14.4329	4999.68	0	?
1441	14.4435	10286.5	0	?	0	525	Calibration	-	1441	14.4454	19404.2	0	?	0	525	Calibration	-	1441	14.4429	6998.64	0	?	0	525	Calibration	-	1441	14.4429	6928.74	0	?	0	525	Calibration	-	1441	14.4448	5600.58	0	?	0	525	Calibration	-	1441	14.4429	4993.94	0	?
1442	14.4535	10311.6	0	?	0	525	Calibration	-	1442	14.4554	19381.3	0	?	0	525	Calibration	-	1442	14.4529	7015.36	0	?	0	525	Calibration	-	1442	14.4529	6944.88	0	?	0	525	Calibration	-	1442	14.4548	5600.3	0	?	0	525	Calibration	-	1442	14.4529	4992.29	0	?
1443	14.4635	10405.6	0	?	0	525	Calibration	-	1443	14.4654	19356.5	0	?	0	525	Calibration	-	1443	14.4629	7000.31	0	?	0	525	Calibration	-	1443	14.4629	6934.21	0	?	0	525	Calibration	-	1443	14.4648	5602.54	0	?	0	525	Calibration	-	1443	14.4629	5007.28	0	?
1444	14.4736	10544.1	0	?	0	525	Calibration	-	1444	14.4755	19330.8	0	?	0	525	Calibration	-	1444	14.4729	7013.86	0	?	0	525	Calibration	-	1444	14.4729	6940.45	0	?	0	525	Calibration	-	1444	14.4748	5603.38	0	?	0	525	Calibration	-	1444	14.4729	4989.07	0	?
1445	14.4836	10777.9	0	?	0	525	Calibration	-	1445	14.4855	19409	0	?	0	525	Calibration	-	1445	14.4829	7015.2	0	?	0	525	Calibration	-	1445	14.4829	6945.14	0	?	0	525	Calibration	-	1445	14.4848	5598.49	0	?	0	525	Calibration	-	1445	14.4829	5012.77	0	?
1446	14.4936	10702.6	0	?	0	525	Calibration	-	1446	14.4955	19554.3	0	?	0	525	Calibration	-	1446	14.4929	7025.28	0	?	0	525	Calibration	-	1446	14.4929	6940.2	0	?	0	525	Calibration	-	1446	14.4949	5626.9	0	?	0	525	Calibration	-	1446	14.4929	5005.13	0	?
1447	14.5036	10421.3	0	?	0	525	Calibration	-	1447	14.5055	19580.5	0	?	0	525	Calibration	-	1447	14.503	7018.98	0	?	0	525	Calibration	-	1447	14.503	6947.79	0	?	0	525	Calibration	-	1447	14.5049	5610.31	0	?	0	525	Calibration	-	1447	14.503	5010.93	0	?
1448	14.5136	10298.1	0	?	0	525	Calibration	-	1448	14.5155	19589.8	0	?	0	525	Calibration	-	1448	14.513	7027.99	0	?	0	525	Calibration	-	1448	14.513	6942.94	0	?	0	525	Calibration	-	1448	14.5149	5602.39	0	?	0	525	Calibration	-	1448	14.513	5023.5	0	?
1449	14.5236	10274.3	0	?	0	525	Calibration	-	1449	14.5256	19529.9	0	?	0	525	Calibration	-	1449	14.523	7034.13	0	?	0	525	Calibration	-	1449	14.523	6954.34	0	?	0	525	Calibration	-	1449	14.5249	5614.61	0	?	0	525	Calibration	-	1449	14.523	5015.97	0	?
1450	14.5337	10320.5	0	?	0	525	Calibration	-	1450	14.5356	19573.5	0	?	0	525	Calibration	-	1450	14.533	7012.04	0	?	0	525	Calibration	-	1450	14.533	6946.58	0	?	0	525	Calibration	-	1450	14.5349	5612.28	0	?	0	525	Calibration	-	1450	14.533	5014.08	0	?
1451	14.5437	10361.9	0	?	0	525	Calibration	-	1451	14.5456	19523.6	0	?	0	525	Calibration	-	1451	14.543	7005.8	0	?	0	525	Calibration	-	1451	14.543	6935.61	0	?	0	525	Calibration	-	1451	14.5449	5589.76	0	?	0	525	Calibration	-	1451	14.543	5020.95	0	?
1452	14.5537	10422.9	0	?	0	525	Calibration	-	1452	14.5556	19513.3	0	?	0	525	Calibration	-	1452	14.553	6999.9	0	?	0	525	Calibration	-	1452	14.553	6933.78	0	?	0	525	Calibration	-	1452	14.555	5606.52	0	?	0	525	Calibration	-	1452	14.553	5026.27	0	?
1453	14.5637	10532.6	0	?	0	525	Calibration	-	1453	14.5656	19456.2	0	?	0	525	Calibration	-	1453	14.5631	6996.11	0	?	0	525	Calibration	-	1453	14.5631	6935.78	0	?	0	525	Calibration	-	1453	14.565	5608.12	0	?	0	525	Calibration	-	1453	14.5631	4987.33	0	?
1454	14.5737	10552.3	0	?	0	525	Calibration	-	1454	14.5756	19375.1	0	?	0	525	Calibration	-	1454	14.5731	6999.27	0	?	0	525	Calibration	-	1454	14.5731	6931.68	0	?	0	525	Calibration	-	1454	14.575	5595.45	0	?	0	525	Calibration	-	1454	14.5731	4999.9	0	?
1455	14.5837	10532.4	0	?	0	525	Calibration	-	1455	14.5857	19331.8	0	?	0	525	Calibration	-	1455	14.5831	7002.75	0	?	0	525	Calibration	-	1455	14.5831	6916.97	0	?	0	525	Calibration	-	1455	14.585	5583.21	0	?	0	525	Calibration	-	1455	14.5831	5009.74	0	?
1456	14.5937	10470.4	0	?	0	525	Calibration	-	1456	14.5957	19286.5	0	?	0	525	Calibration	-	1456	14.5931	6999.46	0	?	0	525	Calibration	-	1456	14.5931	6901.19	0	?	0	525	Calibration	-	1456	14.595	5580.14	0	?	0	525	Calibration	-	1456	14.5931	5004.16	0	?
1457	14.6038	10434.1	0	?	0	525	Calibration	-	1457	14.6057	19254.6	0	?	0	525	Calibration	-	1457	14.6031	7001.59	0	?	0	525	Calibration	-	1457	14.6031	6908.04	0	?	0	525	Calibration	-	1457	14.605	5597.89	0	?	0	525	Calibration	-	1457	14.6031	5007.25	0	?
1458	14.6138	10478.4	0	?	0	525	Calibration	-	1458	14.6157	19253.5	0	?	0	525	Calibration	-	1458	14.6131	7000.98	0	?	0	525	Calibration	-	1458	14.6131	6925.96	0	?	0	525	Calibration	-	1458	14.6151	5598	0	?	0	525	Calibration	-	1458	14.6131	5003.68	0	?
1459	14.6238	10505.5	0	?	0	525	Calibration	-	1459	14.6257	19258.5	0	?	0	525	Calibration	-	1459	14.6232	7013.57	0	?	0	525	Calibration	-	1459	14.6232	6919.66	0	?	0	525	Calibration	-	1459	14.6251	5586.84	0	?	0	525	Calibration	-	1459	14.6232	5014.68	0	?
1460	14.6338	10502.8	0	?	0	525	Calibration	-	1460	14.6357	19279.8	0	?	0	525	Calibration	-	1460	14.6332	7013.76	0	?	0	525	Calibration	-	1460	14.6332	6922.89	0	?	0	525	Calibration	-	1460	14.6351	5595.68	0	?	0	525	Calibration	-	1460	14.6332	4991.16	0	?
1461	14.6438	10465.3	0	?	0	525	Calibration	-	1461	14.6458	19309.3	0	?	0	525	Calibration	-	1461	14.6432	7003.59	0	?	0	525	Calibration	-	1461	14.6432	6903.36	0	?	0	525	Calibration	-	1461	14.6451	5585.98	0	?	0	525	Calibration	-	1461	14.6432	5008.89	0	?
1462	14.6538	10355.5	0	?	0	525	Calibration	-	1462	14.6558	19287.5	0	?	0	525	Calibration	-	1462	14.6532	6999.9	0	?	0	525	Calibration	-	1462	14.6532	6913.15	0	?	0	525	Calibration	-	1462	14.6551	5577.7	0	?	0	525	Calibration	-	1462	14.6532	5001.81	0	?
1463	14.6639	10336	0	?	0	525	Calibration	-	1463	14.6658	19252.5	0	?	0	525	Calibration	-	1463	14.6632	7008.45	0	?	0	525	Calibration	-	1463	14.6632	6909.88	0	?	0	525	Calibration	-	1463	14.6652	5596.53	0	?	0	525	Calibration	-	1463	14.6632	5018.63	0	?
1464	14.6739	10378.8	0	?	0	525	Calibration	-	1464	14.6758	19238.1	0	?	0	525	Calibration	-	1464	14.6732	6996.17	0	?	0	525	Calibration	-	1464	14.6732	6912.27	0	?	0	525	Calibration	-	1464	14.6752	5599.9	0	?	0	525	Calibration	-	1464	14.6732	5012.28	0	?
1465	14.6839	10414.7	0	?	0	525	Calibration	-	1465	14.6858	19221.1	0	?	0	525	Calibration	-	1465	14.6832	7001.11	0	?	0	525	Calibration	-	1465	14.6832	6908.69	0	?	0	525	Calibration	-	1465	14.6852	5607.54	0	?	0	525	Calibration	-	1465	14.6832	5013.83	0	?
1466	14.6939	10481.1	0	?	0	525	Calibration	-	1466	14.6959	19235.2	0	?	0	525	Calibration	-	1466	14.6933	7012.58	0	?	0	525	Calibration	-	1466	14.6933	6927.69	0	?	0	525	Calibration	-	1466	14.6952	5607.03	0	?	0	525	Calibration	-	1466	14.6933	5007.83	0	?
1467	14.7039	10563.6	0	?	0	525	Calibration	-	1467	14.7059	19203.6	0	?	0	525	Calibration	-	1467	14.7033	7012.1	0	?	0	525	Calibration	-	1467	14.7033	6933.88	0	?	0	525	Calibration	-	1467	14.7052	5593.95	0	?	0	525	Calibration	-	1467	14.7033	5026.03	0	?
1468	14.7139	10589	0	?	0	525	Calibration	-	1468	14.7159	19246	0	?	0	525	Calibration	-	1468	14.7133	7011.86	0	?	0	525	Calibration	-	1468	14.7133	6927.51	0	?	0	525	Calibration	-	1468	14.7152	5613.46	0	?	0	525	Calibration	-	1468	14.7133	5019.71	0	?
1469	14.724	10615.3	0	?	0	525	Calibration	-	1469	14.7259	19290.4	0	?	0	525	Calibration	-	1469	14.7233	7005.73	0	?	0	525	Calibration	-	1469	14.7233	6922.07	0	?	0	525	Calibration	-	1469	14.7253	5600.14	0	?	0	525	Calibration	-	1469	14.7233	5028.58	0	?
1470	14.734	10551.8	0	?	0	525	Calibration	-	1470	14.7359	19342	0	?	0	525	Calibration	-	1470	14.7333	7006.68	0	?	0	525	Calibration	-	1470	14.7333	6926.75	0	?	0	525	Calibration	-	1470	14.7353	5595.49	0	?	0	525	Calibration	-	1470	14.7333	5015.54	0	?
1471	14.744	10504.4	0	?	0	525	Calibration	-	1471	14.7459	19350.2	0	?	0	525	Calibration	-	1471	14.7433	6990.46	0	?	0	525	Calibration	-	1471	14.7433	6927.78	0	?	0	525	Calibration	-	1471	14.7453	5596.39	0	?	0	525	Calibration	-	1471	14.7433	4993.51	0	?
1472	14.754	10370.1	0	?	0	525	Calibration	-	1472	14.756	19303.5	0	?	0	525	Calibration	-	1472	14.7534	7002.61	0	?	0	525	Calibration	-	1472	14.7534	6923.63	0	?	0	525	Calibration	-	1472	14.7553	5606.9	0	?	0	525	Calibration	-	1472	14.7534	5011.83	0	?
1473	14.764	10251.5	0	?	0	525	Calibration	-	1473	14.766	19284.3	0	?	0	525	Calibration	-	1473	14.7634	7010.52	0	?	0	525	Calibration	-	1473	14.7634	6921.01	0	?	0	525	Calibration	-	1473	14.7653	5608.05	0	?	0	525	Calibration	-	1473	14.7634	5013.72	0	?
1474	14.774	10248.5	0	?	0	525	Calibration	-	1474	14.776	19316.7	0	?	0	525	Calibration	-	1474	14.7734	7016.41	0	?	0	525	Calibration	-	1474	14.7734	6940.6	0	?	0	525	Calibration	-	1474	14.7753	5597.14	0	?	0	525	Calibration	-	1474	14.7734	5011.92	0	?
1475	14.7841	10296.4	0	?	0	525	Calibration	-	1475	14.786	19356.3	0	?	0	525	Calibration	-	1475	14.7834	7007.48	0	?	0	525	Calibration	-	1475	14.7834	6917.38	0	?	0	525	Calibration	-	1475	14.7854	5599.97	0	?	0	525	Calibration	-	1475	14.7834	5007.61	0	?
1476	14.7941	10357.9	0	?	0	525	Calibration	-	1476	14.796	19332.6	0	?	0	525	Calibration	-	1476	14.7934	7009.88	0	?	0	525	Calibration	-	1476	14.7934	6919.17	0	?	0	525	Calibration	-	1476	14.7954	5589.78	0	?	0	525	Calibration	-	1476	14.7934	5006.5	0	?
1477	14.8041	10428.6	0	?	0	525	Calibration	-	1477	14.806	19367.7	0	?	0	525	Calibration	-	1477	14.8034	7001.06	0	?	0	525	Calibration	-	1477	14.8034	6915.87	0	?	0	525	Calibration	-	1477	14.8054	5612.88	0	?	0	525	Calibration	-	1477	14.8034	5012.66	0	?
1478	14.8141	10435	0	?	0	525	Calibration	-	1478	14.8161	19287	0	?	0	525	Calibration	-	1478	14.8135	7000.58	0	?	0	525	Calibration	-	1478	14.8135	6923.25	0	?	0	525	Calibration	-	1478	14.8154	5598.59	0	?	0	525	Calibration	-	1478	14.8135	5002.64	0	?
1479	14.8241	10405.2	0	?	0	525	Calibration	-	1479	14.8261	19244.5	0	?	0	525	Calibration	-	1479	14.8235	7011.6	0	?	0	525	Calibration	-	1479	14.8235	6918.81	0	?	0	525	Calibration	-	1479	14.8254	5592.02	0	?	0	525	Calibration	-	1479	14.8235	5023.32	0	?
1480	14.8341	10263.9	0	?	0	525	Calibration	-	1480	14.8361	19159.9	0	?	0	525	Calibration	-	1480	14.8335	6994.96	0	?	0	525	Calibration	-	1480	14.8335	6919.51	0	?	0	525	Calibration	-	1480	14.8354	5587.68	0	?	0	525	Calibration	-	1480	14.8335	5012.23	0	?
1481	14.8442	10243.3	0	?	0	525	Calibration	-	1481	14.8461	19084.8	0	?	0	525	Calibration	-	1481	14.8435	7007.5	0	?	0	525	Calibration	-	1481	14.8435	6925.66	0	?	0	525	Calibration	-	1481	14.8455	5596.28	0	?	0	525	Calibration	-	1481	14.8435	5033.06	0	?
1482	14.8542	10232.4	0	?	0	525	Calibration	-	1482	14.8561	19080.1	0	?	0	525	Calibration	-	1482	14.8535	6984.31	0	?	0	525	Calibration	-	1482	14.8535	6933.48	0	?	0	525	Calibration	-	1482	14.8555	5600.73	0	?	0	525	Calibration	-	1482	14.8535	5020.27	0	?
1483	14.8642	10192.9	0	?	0	525	Calibration	-	1483	14.8661	19136.5	0	?	0	525	Calibration	-	1483	14.8635	6990.95	0	?	0	525	Calibration	-	1483	14.8635	6933.4	0	?	0	525	Calibration	-	1483	14.8655	5597.76	0	?	0	525	Calibration	-	1483	14.8635	5005.47	0	?
1484	14.8742	10214.4	0	?	0	525	Calibration	-	1484	14.8762	19230.9	0	?	0	525	Calibration	-	1484	14.8736	6992.28	0	?	0	525	Calibration	-	1484	14.8736	6938.59	0	?	0	525	Calibration	-	1484	14.8755	5614.11	0	?	0	525	Calibration	-	1484	14.8736	5015.19	0	?
1485	14.8842	10294.8	0	?	0	525	Calibration	-	1485	14.8862	19204.8	0	?	0	525	Calibration	-	1485	14.8836	7002.83	0	?	0	525	Calibration	-	1485	14.8836	6940.46	0	?	0	525	Calibration	-	1485	14.8855	5603.06	0	?	0	525	Calibration	-	1485	14.8836	5023.35	0	?
1486	14.8942	10341	0	?	0	525	Calibration	-	1486	14.8962	19173.6	0	?	0	525	Calibration	-	1486	14.8936	7005.71	0	?	0	525	Calibration	-	1486	14.8936	6926.05	0	?	0	525	Calibration	-	1486	14.8955	5594.11	0	?	0	525	Calibration	-	1486	14.8936	5006.2	0	?
1487	14.9043	10302.8	0	?	0	525	Calibration	-	1487	14.9062	19157.5	0	?	0	525	Calibration	-	1487	14.9036	7000.61	0	?	0	525	Calibration	-	1487	14.9036	6904.34	0	?	0	525	Calibration	-	1487	14.9056	5617.74	0	?	0	525	Calibration	-	1487	14.9036	5007.35	0	?
1488	14.9143	10304.7	0	?	0	525	Calibration	-	1488	14.9162	19112.2	0	?	0	525	Calibration	-	1488	14.9136	7016.32	0	?	0	525	Calibration	-	1488	14.9136	6914.57	0	?	0	525	Calibration	-	1488	14.9156	5597.47	0	?	0	525	Calibration	-	1488	14.9136	5009.29	0	?
1489	14.9243	10336	0	?	0	525	Calibration	-	1489	14.9263	19116.5	0	?	0	525	Calibration	-	1489	14.9236	6999.8	0	?	0	525	Calibration	-	1489	14.9236	6921.97	0	?	0	525	Calibration	-	1489	14.9256	5604.68	0	?	0	525	Calibration	-	1489	14.9236	5002.78	0	?
1490	14.9343	10377.8	0	?	0	525	Calibration	-	1490	14.9363	19093.8	0	?	0	525	Calibration	-	1490	14.9336	7000.96	0	?	0	525	Calibration	-	1490	14.9336	6930.03	0	?	0	525	Calibration	-	1490	14.9356	5605.86	0	?	0	525	Calibration	-	1490	14.9336	5011.82	0	?
1491	14.9443	10482.4	0	?	0	525	Calibration	-	1491	14.9463	19180.6	0	?	0	525	Calibration	-	1491	14.9437	6994.47	0	?	0	525	Calibration	-	1491	14.9437	6917.5	0	?	0	525	Calibration	-	1491	14.9456	5604.57	0	?	0	525	Calibration	-	1491	14.9437	5004.57	0	?
1492	14.9543	10464.2	0	?	0	525	Calibration	-	1492	14.9563	19181	0	?	0	525	Calibration	-	1492	14.9537	6980.87	0	?	0	525	Calibration	-	1492	14.9537	6921.87	0	?	0	525	Calibration	-	1492	14.9557	5606.45	0	?	0	525	Calibration	-	1492	14.9537	5013.28	0	?
1493	14.9644	10413.4	0	?	0	525	Calibration	-	1493	14.9663	19088.8	0	?	0	525	Calibration	-	1493	14.9637	6993.72	0	?	0	525	Calibration	-	1493	14.9637	6916.21	0	?	0	525	Calibration	-	1493	14.9657	5585.11	0	?	0	525	Calibration	-	1493	14.9637	5009.97	0	?
1494	14.9744	10391.2	0	?	0	525	Calibration	-	1494	14.9763	19065.5	0	?	0	525	Calibration	-	1494	14.9737	6980.59	0	?	0	525	Calibration	-	1494	14.9737	6914.41	0	?	0	525	Calibration	-	1494	14.9757	5593.94	0	?	0	525	Calibration	-	1494	14.9737	5021.73	0	?
1495	14.9844	10486.7	0	?	0	525	Calibration	-	1495	14.9864	19072.1	0	?	0	525	Calibration	-	1495	14.9837	6987.2	0	?	0	525	Calibration	-	1495	14.9837	6918.38	0	?	0	525	Calibration	-	1495	14.9857	5606.88	0	?	0	525	Calibration	-	1495	14.9837	4995.72	0	?
1496	14.9944	10465.2	0	?	0	525	Calibration	-	1496	14.9964	19038.1	0	?	0	525	Calibration	-	1496	14.9937	6996.22	0	?	0	525	Calibration	-	1496	14.9937	6912.5	0	?	0	525	Calibration	-	1496	14.9957	5609.94	0	?	0	525	Calibration	-	1496	14.9937	5000.21	0	?
1497	15.0044	10460.6	0	?	0	525	Calibration	-	1497	15.0064	19065.1	0	?	0	525	Calibration	-	1497	15.0038	6984.64	0	?	0	525	Calibration	-	1497	15.0038	6925	0	?	0	525	Calibration	-	1497	15.0057	5597.57	0	?	0	525	Calibration	-	1497	15.0038	5005.05	0	?
1498	15.0144	10484.6	0	?	0	525	Calibration	-	1498	15.0164	19165.6	0	?	0	525	Calibration	-	1498	15.0138	6986.79	0	?	0	525	Calibration	-	1498	15.0138	6929.13	0	?	0	525	Calibration	-	1498	15.0158	5622.93	0	?	0	525	Calibration	-	1498	15.0138	5010.35	0	?
1499	15.0244	10604.4	0	?	0	525	Calibration	-	1499	15.0264	19533.6	0	?	0	525	Calibration	-	1499	15.0238	6995.45	0	?	0	525	Calibration	-	1499	15.0238	6914.68	0	?	0	525	Calibration	-	1499	15.0258	5596.91	0	?	0	525	Calibration	-	1499	15.0238	5007.63	0	?
1500	15.0345	10622	0	?	0	525	Calibration	-	1500	15.0364	19594.9	0	?	0	525	Calibration	-	1500	15.0338	6986.99	0	?	0	525	Calibration	-	1500	15.0338	6930.08	0	?	0	525	Calibration	-	1500	15.0358	5598.45	0	?	0	525	Calibration	-	1500	15.0338	5005.65	0	?
1501	15.0445	10511.3	0	?	0	525	Calibration	-	1501	15.0465	19522.3	0	?	0	525	Calibration	-	1501	15.0438	6983.22	0	?	0	525	Calibration	-	1501	15.0438	6932.85	0	?	0	525	Calibration	-	1501	15.0458	5593.83	0	?	0	525	Calibration	-	1501	15.0438	5008.48	0	?
1502	15.0545	10580.6	0	?	0	525	Calibration	-	1502	15.0565	19399	0	?	0	525	Calibration	-	1502	15.0538	7003.33	0	?	0	525	Calibration	-	1502	15.0538	6929.19	0	?	0	525	Calibration	-	1502	15.0558	5597.79	0	?	0	525	Calibration	-	1502	15.0538	5018.99	0	?
1503	15.0645	10602.6	0	?	0	525	Calibration	-	1503	15.0665	19336.3	0	?	0	525	Calibration	-	1503	15.0639	7004.93	0	?	0	525	Calibration	-	1503	15.0639	6919.97	0	?	0	525	Calibration	-	1503	15.0658	5595.2	0	?	0	525	Calibration	-	1503	15.0639	5008.12	0	?
1504	15.0745	10625.2	0	?	0	525	Calibration	-	1504	15.0765	19261.9	0	?	0	525	Calibration	-	1504	15.0739	6988.89	0	?	0	525	Calibration	-	1504	15.0739	6916.38	0	?	0	525	Calibration	-	1504	15.0759	5599.74	0	?	0	525	Calibration	-	1504	15.0739	5015.13	0	?
1505	15.0845	10668.3	0	?	0	525	Calibration	-	1505	15.0865	19257.6	0	?	0	525	Calibration	-	1505	15.0839	6998.02	0	?	0	525	Calibration	-	1505	15.0839	6907.61	0	?	0	525	Calibration	-	1505	15.0859	5588.55	0	?	0	525	Calibration	-	1505	15.0839	5011.85	0	?
1506	15.0946	10659.1	0	?	0	525	Calibration	-	1506	15.0966	19282.2	0	?	0	525	Calibration	-	1506	15.0939	6991.53	0	?	0	525	Calibration	-	1506	15.0939	6895.11	0	?	0	525	Calibration	-	1506	15.0959	5579.75	0	?	0	525	Calibration	-	1506	15.0939	5004.44	0	?
1507	15.1046	10684.8	0	?	0	525	Calibration	-	1507	15.1066	19293.1	0	?	0	525	Calibration	-	1507	15.1039	6992.97	0	?	0	525	Calibration	-	1507	15.1039	6896.81	0	?	0	525	Calibration	-	1507	15.1059	5581.25	0	?	0	525	Calibration	-	1507	15.1039	5007.07	0	?
1508	15.1146	10566.2	0	?	0	525	Calibration	-	1508	15.1166	19319	0	?	0	525	Calibration	-	1508	15.1139	7002.8	0	?	0	525	Calibration	-	1508	15.1139	6900.33	0	?	0	525	Calibration	-	1508	15.1159	5599.89	0	?	0	525	Calibration	-	1508	15.1139	4992.54	0	?
1509	15.1246	10568.4	0	?	0	525	Calibration	-	1509	15.1266	19375.6	0	?	0	525	Calibration	-	1509	15.1239	7004.44	0	?	0	525	Calibration	-	1509	15.1239	6897.56	0	?	0	525	Calibration	-	1509	15.1259	5603.01	0	?	0	525	Calibration	-	1509	15.1239	4993.83	0	?
1510	15.1346	10602.2	0	?	0	525	Calibration	-	1510	15.1366	19367.6	0	?	0	525	Calibration	-	1510	15.134	6997.96	0	?	0	525	Calibration	-	1510	15.134	6906.17	0	?	0	525	Calibration	-	1510	15.136	5595.2	0	?	0	525	Calibration	-	1510	15.134	5003.31	0	?
1511	15.1446	10615.6	0	?	0	525	Calibration	-	1511	15.1466	19293.5	0	?	0	525	Calibration	-	1511	15.144	6982.61	0	?	0	525	Calibration	-	1511	15.144	6899.45	0	?	0	525	Calibration	-	1511	15.146	5582.62	0	?	0	525	Calibration	-	1511	15.144	5005.99	0	?
1512	15.1547	10633.9	0	?	0	525	Calibration	-	1512	15.1567	19243.9	0	?	0	525	Calibration	-	1512	15.154	7000.07	0	?	0	525	Calibration	-	1512	15.154	6898.82	0	?	0	525	Calibration	-	1512	15.156	5588.6	0	?	0	525	Calibration	-	1512	15.154	5002.43	0	?
1513	15.1647	10711.4	0	?	0	525	Calibration	-	1513	15.1667	19251.2	0	?	0	525	Calibration	-	1513	15.164	6990.7	0	?	0	525	Calibration	-	1513	15.164	6904.88	0	?	0	525	Calibration	-	1513	15.166	5611.95	0	?	0	525	Calibration	-	1513	15.164	4999.57	0	?
1514	15.1747	10656.4	0	?	0	525	Calibration	-	1514	15.1767	19252.6	0	?	0	525	Calibration	-	1514	15.174	7009.58	0	?	0	525	Calibration	-	1514	15.174	6927.4	0	?	0	525	Calibration	-	1514	15.176	5593.33	0	?	0	525	Calibration	-	1514	15.174	5005.83	0	?
1515	15.1847	10580.3	0	?	0	525	Calibration	-	1515	15.1867	19203.1	0	?	0	525	Calibration	-	1515	15.184	6989.15	0	?	0	525	Calibration	-	1515	15.184	6914.69	0	?	0	525	Calibration	-	1515	15.186	5617.96	0	?	0	525	Calibration	-	1515	15.184	4988.06	0	?
1516	15.1947	10469.9	0	?	0	525	Calibration	-	1516	15.1967	19227.4	0	?	0	525	Calibration	-	1516	15.1941	6996.94	0	?	0	525	Calibration	-	1516	15.1941	6925.1	0	?	0	525	Calibration	-	1516	15.1961	5606.81	0	?	0	525	Calibration	-	1516	15.1941	5007.88	0	?
1517	15.2047	10383.3	0	?	0	525	Calibration	-	1517	15.2067	19254.6	0	?	0	525	Calibration	-	1517	15.2041	7012.31	0	?	0	525	Calibration	-	1517	15.2041	6919.3	0	?	0	525	Calibration	-	1517	15.2061	5603.48	0	?	0	525	Calibration	-	1517	15.2041	5013.43	0	?
1518	15.2148	10426.7	0	?	0	525	Calibration	-	1518	15.2168	19271.7	0	?	0	525	Calibration	-	1518	15.2141	7001.07	0	?	0	525	Calibration	-	1518	15.2141	6909.01	0	?	0	525	Calibration	-	1518	15.2161	5609.3	0	?	0	525	Calibration	-	1518	15.2141	5012.47	0	?
1519	15.2248	10451.2	0	?	0	525	Calibration	-	1519	15.2268	19213.4	0	?	0	525	Calibration	-	1519	15.2241	7009.45	0	?	0	525	Calibration	-	1519	15.2241	6921.96	0	?	0	525	Calibration	-	1519	15.2261	5594.53	0	?	0	525	Calibration	-	1519	15.2241	5012.29	0	?
1520	15.2348	10582.4	0	?	0	525	Calibration	-	1520	15.2368	19183.8	0	?	0	525	Calibration	-	1520	15.2341	7013.56	0	?	0	525	Calibration	-	1520	15.2341	6924	0	?	0	525	Calibration	-	1520	15.2361	5588.21	0	?	0	525	Calibration	-	1520	15.2341	4999.25	0	?
1521	15.2448	10687.9	0	?	0	525	Calibration	-	1521	15.2468	19243.2	0	?	0	525	Calibration	-	1521	15.2441	7001.65	0	?	0	525	Calibration	-	1521	15.2441	6929.78	0	?	0	525	Calibration	-	1521	15.2461	5562.85	0	?	0	525	Calibration	-	1521	15.2441	5021.22	0	?
1522	15.2548	10655.6	0	?	0	525	Calibration	-	1522	15.2568	19232.6	0	?	0	525	Calibration	-	1522	15.2542	6997.39	0	?	0	525	Calibration	-	1522	15.2542	6917.31	0	?	0	525	Calibration	-	1522	15.2562	5576.73	0	?	0	525	Calibration	-	1522	15.2542	5001	0	?
1523	15.2648	10630.8	0	?	0	525	Calibration	-	1523	15.2669	19286.6	0	?	0	525	Calibration	-	1523	15.2642	6989.7	0	?	0	525	Calibration	-	1523	15.2642	6922.52	0	?	0	525	Calibration	-	1523	15.2662	5593.62	0	?	0	525	Calibration	-	1523	15.2642	5002.76	0	?
1524	15.2749	10599.6	0	?	0	525	Calibration	-	1524	15.2769	19332.3	0	?	0	525	Calibration	-	1524	15.2742	6994.88	0	?	0	525	Calibration	-	1524	15.2742	6918.29	0	?	0	525	Calibration	-	1524	15.2762	5598.16	0	?	0	525	Calibration	-	1524	15.2742	5000.77	0	?
1525	15.2849	10609.5	0	?	0	525	Calibration	-	1525	15.2869	19438.5	0	?	0	525	Calibration	-	1525	15.2842	7000.88	0	?	0	525	Calibration	-	1525	15.2842	6930.98	0	?	0	525	Calibration	-	1525	15.2862	5600.23	0	?	0	525	Calibration	-	1525	15.2842	5004.17	0	?
1526	15.2949	10694.3	0	?	0	525	Calibration	-	1526	15.2969	19413.5	0	?	0	525	Calibration	-	1526	15.2942	6996.09	0	?	0	525	Calibration	-	1526	15.2942	6920.05	0	?	0	525	Calibration	-	1526	15.2962	5604.3	0	?	0	525	Calibration	-	1526	15.2942	5002.91	0	?
1527	15.3049	10688.8	0	?	0	525	Calibration	-	1527	15.3069	19389.2	0	?	0	525	Calibration	-	1527	15.3042	6996.93	0	?	0	525	Calibration	-	1527	15.3042	6926.67	0	?	0	525	Calibration	-	1527	15.3063	5592.78	0	?	0	525	Calibration	-	1527	15.3042	5002.48	0	?
1528	15.3149	10604.5	0	?	0	525	Calibration	-	1528	15.3169	19311.7	0	?	0	525	Calibration	-	1528	15.3142	7002.36	0	?	0	525	Calibration	-	1528	15.3142	6916.48	0	?	0	525	Calibration	-	1528	15.3163	5574.53	0	?	0	525	Calibration	-	1528	15.3142	5011.45	0	?
1529	15.3249	10497.1	0	?	0	525	Calibration	-	1529	15.327	19309.1	0	?	0	525	Calibration	-	1529	15.3243	7001.65	0	?	0	525	Calibration	-	1529	15.3243	6904.73	0	?	0	525	Calibration	-	1529	15.3263	5585.77	0	?	0	525	Calibration	-	1529	15.3243	4988.68	0	?
1530	15.335	10482	0	?	0	525	Calibration	-	1530	15.337	19306.8	0	?	0	525	Calibration	-	1530	15.3343	7000.22	0	?	0	525	Calibration	-	1530	15.3343	6915.96	0	?	0	525	Calibration	-	1530	15.3363	5587.48	0	?	0	525	Calibration	-	1530	15.3343	5018.87	0	?
1531	15.345	10451.3	0	?	0	525	Calibration	-	1531	15.347	19330.6	0	?	0	525	Calibration	-	1531	15.3443	6992.58	0	?	0	525	Calibration	-	1531	15.3443	6914.07	0	?	0	525	Calibration	-	1531	15.3463	5604.08	0	?	0	525	Calibration	-	1531	15.3443	5002.94	0	?
1532	15.355	10475.9	0	?	0	525	Calibration	-	1532	15.357	19335.5	0	?	0	525	Calibration	-	1532	15.3543	7004.78	0	?	0	525	Calibration	-	1532	15.3543	6909.21	0	?	0	525	Calibration	-	1532	15.3563	5597.02	0	?	0	525	Calibration	-	1532	15.3543	4994.77	0	?
1533	15.365	10498	0	?	0	525	Calibration	-	1533	15.367	19322.5	0	?	0	525	Calibration	-	1533	15.3643	6994.08	0	?	0	525	Calibration	-	1533	15.3643	6914.86	0	?	0	525	Calibration	-	1533	15.3664	5571.22	0	?	0	525	Calibration	-	1533	15.3643	5009.63	0	?
1534	15.375	10558.6	0	?	0	525	Calibration	-	1534	15.377	19372.2	0	?	0	525	Calibration	-	1534	15.3743	6995.95	0	?	0	525	Calibration	-	1534	15.3743	6922.88	0	?	0	525	Calibration	-	1534	15.3764	5591.22	0	?	0	525	Calibration	-	1534	15.3743	5001.45	0	?
1535	15.385	10564.3	0	?	0	525	Calibration	-	1535	15.3871	19418.3	0	?	0	525	Calibration	-	1535	15.3844	7001.31	0	?	0	525	Calibration	-	1535	15.3844	6909.43	0	?	0	525	Calibration	-	1535	15.3864	5588.16	0	?	0	525	Calibration	-	1535	15.3844	5020.11	0	?
1536	15.3951	10542.1	0	?	0	525	Calibration	-	1536	15.3971	19420	0	?	0	525	Calibration	-	1536	15.3944	6998.13	0	?	0	525	Calibration	-	1536	15.3944	6893.38	0	?	0	525	Calibration	-	1536	15.3964	5584.96	0	?	0	525	Calibration	-	1536	15.3944	4993.71	0	?
1537	15.4051	10349.8	0	?	0	525	Calibration	-	1537	15.4071	19432.4	0	?	0	525	Calibration	-	1537	15.4044	7003.51	0	?	0	525	Calibration	-	1537	15.4044	6917.73	0	?	0	525	Calibration	-	1537	15.4064	5585.32	0	?	0	525	Calibration	-	1537	15.4044	5005.03	0	?
1538	15.4151	10265.7	0	?	0	525	Calibration	-	1538	15.4171	19502.6	0	?	0	525	Calibration	-	1538	15.4144	6987.09	0	?	0	525	Calibration	-	1538	15.4144	6908.19	0	?	0	525	Calibration	-	1538	15.4164	5592.39	0	?	0	525	Calibration	-	1538	15.4144	4989.82	0	?
1539	15.4251	10235.1	0	?	0	525	Calibration	-	1539	15.4271	19512.2	0	?	0	525	Calibration	-	1539	15.4244	7005.28	0	?	0	525	Calibration	-	1539	15.4244	6921.79	0	?	0	525	Calibration	-	1539	15.4265	5609.36	0	?	0	525	Calibration	-	1539	15.4244	5004.2	0	?
1540	15.4351	10220.1	0	?	0	525	Calibration	-	1540	15.4372	19403.9	0	?	0	525	Calibration	-	1540	15.4344	6993.05	0	?	0	525	Calibration	-	1540	15.4344	6910.92	0	?	0	525	Calibration	-	1540	15.4365	5564.8	0	?	0	525	Calibration	-	1540	15.4344	5001.47	0	?
1541	15.4451	10287.7	0	?	0	525	Calibration	-	1541	15.4472	19350.2	0	?	0	525	Calibration	-	1541	15.4445	7000.97	0	?	0	525	Calibration	-	1541	15.4445	6921.64	0	?	0	525	Calibration	-	1541	15.4465	5567.78	0	?	0	525	Calibration	-	1541	15.4445	4999.84	0	?
1542	15.4552	10300	0	?	0	525	Calibration	-	1542	15.4572	19305.9	0	?	0	525	Calibration	-	1542	15.4545	7004.02	0	?	0	525	Calibration	-	1542	15.4545	6918.05	0	?	0	525	Calibration	-	1542	15.4565	5575.59	0	?	0	525	Calibration	-	1542	15.4545	4997.71	0	?
1543	15.4652	10226.6	0	?	0	525	Calibration	-	1543	15.4672	19274.1	0	?	0	525	Calibration	-	1543	15.4645	7009.49	0	?	0	525	Calibration	-	1543	15.4645	6917.07	0	?	0	525	Calibration	-	1543	15.4665	5589.36	0	?	0	525	Calibration	-	1543	15.4645	5013.98	0	?
1544	15.4752	10170.8	0	?	0	525	Calibration	-	1544	15.4772	19237.8	0	?	0	525	Calibration	-	1544	15.4745	7007.36	0	?	0	525	Calibration	-	1544	15.4745	6896.38	0	?	0	525	Calibration	-	1544	15.4765	5600.74	0	?	0	525	Calibration	-	1544	15.4745	5011.52	0	?
1545	15.4852	10122.5	0	?	0	525	Calibration	-	1545	15.4872	19248.3	0	?	0	525	Calibration	-	1545	15.4845	7003.07	0	?	0	525	Calibration	-	1545	15.4845	6900.4	0	?	0	525	Calibration	-	1545	15.4866	5581.84	0	?	0	525	Calibration	-	1545	15.4845	4997.03	0	?
1546	15.4952	10102.1	0	?	0	525	Calibration	-	1546	15.4973	19237.7	0	?	0	525	Calibration	-	1546	15.4945	6996.69	0	?	0	525	Calibration	-	1546	15.4945	6934.24	0	?	0	525	Calibration	-	1546	15.4966	5592.78	0	?	0	525	Calibration	-	1546	15.4945	5021.21	0	?
1547	15.5052	10123.5	0	?	0	525	Calibration	-	1547	15.5073	19253	0	?	0	525	Calibration	-	1547	15.5045	7006	0	?	0	525	Calibration	-	1547	15.5045	6918.28	0	?	0	525	Calibration	-	1547	15.5066	5567.71	0	?	0	525	Calibration	-	1547	15.5045	4994.91	0	?
1548	15.5152	10164.9	0	?	0	525	Calibration	-	1548	15.5173	19330.8	0	?	0	525	Calibration	-	1548	15.5146	6985.84	0	?	0	525	Calibration	-	1548	15.5146	6913.31	0	?	0	525	Calibration	-	1548	15.5166	5564.5	0	?	0	525	Calibration	-	1548	15.5146	4986.19	0	?
1549	15.5253	10201.1	0	?	0	525	Calibration	-	1549	15.5273	19339.6	0	?	0	525	Calibration	-	1549	15.5246	6999.13	0	?	0	525	Calibration	-	1549	15.5246	6927.02	0	?	0	525	Calibration	-	1549	15.5266	5589.89	0	?	0	525	Calibration	-	1549	15.5246	5003.62	0	?
1550	15.5353	10256.9	0	?	0	525	Calibration	-	1550	15.5373	19295.3	0	?	0	525	Calibration	-	1550	15.5346	7011.91	0	?	0	525	Calibration	-	1550	15.5346	6917.47	0	?	0	525	Calibration	-	1550	15.5366	5607.31	0	?	0	525	Calibration	-	1550	15.5346	4993.49	0	?
1551	15.5453	10241	0	?	0	525	Calibration	-	1551	15.5473	19292.5	0	?	0	525	Calibration	-	1551	15.5446	6983.85	0	?	0	525	Calibration	-	1551	15.5446	6895.37	0	?	0	525	Calibration	-	1551	15.5467	5591.95	0	?	0	525	Calibration	-	1551	15.5446	4999.45	0	?
1552	15.5553	10289.2	0	?	0	525	Calibration	-	1552	15.5574	19283.8	0	?	0	525	Calibration	-	1552	15.5546	6983.9	0	?	0	525	Calibration	-	1552	15.5546	6888.48	0	?	0	525	Calibration	-	1552	15.5567	5597.15	0	?	0	525	Calibration	-	1552	15.5546	5010.66	0	?
1553	15.5653	10354.4	0	?	0	525	Calibration	-	1553	15.5674	19279.1	0	?	0	525	Calibration	-	1553	15.5646	6990.45	0	?	0	525	Calibration	-	1553	15.5646	6893.6	0	?	0	525	Calibration	-	1553	15.5667	5602.78	0	?	0	525	Calibration	-	1553	15.5646	5000.7	0	?
1554	15.5753	10461.6	0	?	0	525	Calibration	-	1554	15.5774	19274.1	0	?	0	525	Calibration	-	1554	15.5747	6991.65	0	?	0	525	Calibration	-	1554	15.5747	6892.4	0	?	0	525	Calibration	-	1554	15.5767	5572.48	0	?	0	525	Calibration	-	1554	15.5747	5020.38	0	?
1555	15.5854	10680.1	0	?	0	525	Calibration	-	1555	15.5874	19231.5	0	?	0	525	Calibration	-	1555	15.5847	6986.5	0	?	0	525	Calibration	-	1555	15.5847	6886.9	0	?	0	525	Calibration	-	1555	15.5867	5566.93	0	?	0	525	Calibration	-	1555	15.5847	4994.83	0	?
1556	15.5954	10716	0	?	0	525	Calibration	-	1556	15.5974	19164.7	0	?	0	525	Calibration	-	1556	15.5947	6998.19	0	?	0	525	Calibration	-	1556	15.5947	6891.38	0	?	0	525	Calibration	-	1556	15.5968	5584.61	0	?	0	525	Calibration	-	1556	15.5947	4997.87	0	?
1557	15.6054	10719	0	?	0	525	Calibration	-	1557	15.6075	19152.1	0	?	0	525	Calibration	-	1557	15.6047	6950.53	0	?	0	525	Calibration	-	1557	15.6047	6883.09	0	?	0	525	Calibration	-	1557	15.6068	5594	0	?	0	525	Calibration	-	1557	15.6047	4996	0	?
1558	15.6154	10750.4	0	?	0	525	Calibration	-	1558	15.6175	19188.9	0	?	0	525	Calibration	-	1558	15.6147	6980.41	0	?	0	525	Calibration	-	1558	15.6147	6909.17	0	?	0	525	Calibration	-	1558	15.6168	5581.79	0	?	0	525	Calibration	-	1558	15.6147	5020.17	0	?
1559	15.6254	10790.5	0	?	0	525	Calibration	-	1559	15.6275	19283.4	0	?	0	525	Calibration	-	1559	15.6247	6991.49	0	?	0	525	Calibration	-	1559	15.6247	6893.8	0	?	0	525	Calibration	-	1559	15.6268	5579.61	0	?	0	525	Calibration	-	1559	15.6247	5006.56	0	?
1560	15.6354	10796	0	?	0	525	Calibration	-	1560	15.6375	19280.4	0	?	0	525	Calibration	-	1560	15.6348	6993.23	0	?	0	525	Calibration	-	1560	15.6348	6899.9	0	?	0	525	Calibration	-	1560	15.6368	5578.5	0	?	0	525	Calibration	-	1560	15.6348	5006.71	0	?
1561	15.6455	10801.9	0	?	0	525	Calibration	-	1561	15.6475	19249.2	0	?	0	525	Calibration	-	1561	15.6448	7008.8	0	?	0	525	Calibration	-	1561	15.6448	6909.49	0	?	0	525	Calibration	-	1561	15.6468	5580.62	0	?	0	525	Calibration	-	1561	15.6448	4995.8	0	?
1562	15.6555	10754	0	?	0	525	Calibration	-	1562	15.6575	19205.7	0	?	0	525	Calibration	-	1562	15.6548	7001.61	0	?	0	525	Calibration	-	1562	15.6548	6907.88	0	?	0	525	Calibration	-	1562	15.6569	5602.59	0	?	0	525	Calibration	-	1562	15.6548	5005.38	0	?
1563	15.6655	10675.2	0	?	0	525	Calibration	-	1563	15.6676	19162.6	0	?	0	525	Calibration	-	1563	15.6648	7001.06	0	?	0	525	Calibration	-	1563	15.6648	6905.79	0	?	0	525	Calibration	-	1563	15.6669	5601.53	0	?	0	525	Calibration	-	1563	15.6648	5015.55	0	?
1564	15.6755	10671.6	0	?	0	525	Calibration	-	1564	15.6776	19150.5	0	?	0	525	Calibration	-	1564	15.6748	7002.05	0	?	0	525	Calibration	-	1564	15.6748	6911.02	0	?	0	525	Calibration	-	1564	15.6769	5600.11	0	?	0	525	Calibration	-	1564	15.6748	5015.66	0	?
1565	15.6855	10595.9	0	?	0	525	Calibration	-	1565	15.6876	19132.7	0	?	0	525	Calibration	-	1565	15.6848	6992.12	0	?	0	525	Calibration	-	1565	15.6848	6926.86	0	?	0	525	Calibration	-	1565	15.6869	5601.49	0	?	0	525	Calibration	-	1565	15.6848	5026.61	0	?
1566	15.6955	10591.4	0	?	0	525	Calibration	-	1566	15.6976	19141.2	0	?	0	525	Calibration	-	1566	15.6949	6980.29	0	?	0	525	Calibration	-	1566	15.6949	6909.77	0	?	0	525	Calibration	-	1566	15.6969	5605.47	0	?	0	525	Calibration	-	1566	15.6949	5013.13	0	?
1567	15.7056	10574.3	0	?	0	525	Calibration	-	1567	15.7076	19166.8	0	?	0	525	Calibration	-	1567	15.7049	6998.25	0	?	0	525	Calibration	-	1567	15.7049	6904.41	0	?	0	525	Calibration	-	1567	15.7069	5598.76	0	?	0	525	Calibration	-	1567	15.7049	5008.98	0	?
1568	15.7156	10454.2	0	?	0	525	Calibration	-	1568	15.7176	19210.3	0	?	0	525	Calibration	-	1568	15.7149	6985.14	0	?	0	525	Calibration	-	1568	15.7149	6908.81	0	?	0	525	Calibration	-	1568	15.717	5572.62	0	?	0	525	Calibration	-	1568	15.7149	4999.45	0	?
1569	15.7256	10386	0	?	0	525	Calibration	-	1569	15.7277	19410.6	0	?	0	525	Calibration	-	1569	15.7249	6983.78	0	?	0	525	Calibration	-	1569	15.7249	6897.58	0	?	0	525	Calibration	-	1569	15.727	5589.09	0	?	0	525	Calibration	-	1569	15.7249	5015.02	0	?
1570	15.7356	10339	0	?	0	525	Calibration	-	1570	15.7377	19486.2	0	?	0	525	Calibration	-	1570	15.7349	6976.57	0	?	0	525	Calibration	-	1570	15.7349	6896.38	0	?	0	525	Calibration	-	1570	15.737	5570.62	0	?	0	525	Calibration	-	1570	15.7349	5006.99	0	?
1571	15.7456	10286.5	0	?	0	525	Calibration	-	1571	15.7477	19601.7	0	?	0	525	Calibration	-	1571	15.7449	6991.59	0	?	0	525	Calibration	-	1571	15.7449	6903.76	0	?	0	525	Calibration	-	1571	15.747	5579.66	0	?	0	525	Calibration	-	1571	15.7449	5008.01	0	?
1572	15.7556	10294.8	0	?	0	525	Calibration	-	1572	15.7577	19668.4	0	?	0	525	Calibration	-	1572	15.7549	6991.43	0	?	0	525	Calibration	-	1572	15.7549	6900.15	0	?	0	525	Calibration	-	1572	15.757	5555.4	0	?	0	525	Calibration	-	1572	15.7549	5012.15	0	?
1573	15.7657	10290.2	0	?	0	525	Calibration	-	1573	15.7677	19604.9	0	?	0	525	Calibration	-	1573	15.765	6994.31	0	?	0	525	Calibration	-	1573	15.765	6919.81	0	?	0	525	Calibration	-	1573	15.767	5570.63	0	?	0	525	Calibration	-	1573	15.765	5009.36	0	?
1574	15.7757	10222.5	0	?	0	525	Calibration	-	1574	15.7778	19473.2	0	?	0	525	Calibration	-	1574	15.775	6983.71	0	?	0	525	Calibration	-	1574	15.775	6923.46	0	?	0	525	Calibration	-	1574	15.7771	5580.48	0	?	0	525	Calibration	-	1574	15.775	4995.38	0	?
1575	15.7857	10144.9	0	?	0	525	Calibration	-	1575	15.7878	19379.6	0	?	0	525	Calibration	-	1575	15.785	6973.52	0	?	0	525	Calibration	-	1575	15.785	6925.65	0	?	0	525	Calibration	-	1575	15.7871	5569.5	0	?	0	525	Calibration	-	1575	15.785	5006.09	0	?
1576	15.7957	10067.8	0	?	0	525	Calibration	-	1576	15.7978	19383.3	0	?	0	525	Calibration	-	1576	15.795	6983.55	0	?	0	525	Calibration	-	1576	15.795	6928.43	0	?	0	525	Calibration	-	1576	15.7971	5587.53	0	?	0	525	Calibration	-	1576	15.795	4995.57	0	?
1577	15.8057	10053.8	0	?	0	525	Calibration	-	1577	15.8078	19359.8	0	?	0	525	Calibration	-	1577	15.805	6989.77	0	?	0	525	Calibration	-	1577	15.805	6895.83	0	?	0	525	Calibration	-	1577	15.8071	5585.45	0	?	0	525	Calibration	-	1577	15.805	4993.67	0	?
1578	15.8157	10084.8	0	?	0	525	Calibration	-	1578	15.8178	19326.9	0	?	0	525	Calibration	-	1578	15.815	6995.08	0	?	0	525	Calibration	-	1578	15.815	6902.67	0	?	0	525	Calibration	-	1578	15.8171	5594.92	0	?	0	525	Calibration	-	1578	15.815	4989.42	0	?
1579	15.8258	10164.5	0	?	0	525	Calibration	-	1579	15.8278	19360.6	0	?	0	525	Calibration	-	1579	15.8251	6981.92	0	?	0	525	Calibration	-	1579	15.8251	6898.16	0	?	0	525	Calibration	-	1579	15.8271	5590.52	0	?	0	525	Calibration	-	1579	15.8251	4997.6	0	?
1580	15.8358	10295.6	0	?	0	525	Calibration	-	1580	15.8379	19367.4	0	?	0	525	Calibration	-	1580	15.8351	6986.77	0	?	0	525	Calibration	-	1580	15.8351	6895.01	0	?	0	525	Calibration	-	1580	15.8372	5602.98	0	?	0	525	Calibration	-	1580	15.8351	4990.02	0	?
1581	15.8458	10244.3	0	?	0	525	Calibration	-	1581	15.8479	19391.3	0	?	0	525	Calibration	-	1581	15.8451	6980.59	0	?	0	525	Calibration	-	1581	15.8451	6894.44	0	?	0	525	Calibration	-	1581	15.8472	5576.56	0	?	0	525	Calibration	-	1581	15.8451	4998.3	0	?
1582	15.8558	10211.6	0	?	0	525	Calibration	-	1582	15.8579	19300.9	0	?	0	525	Calibration	-	1582	15.8551	6978.56	0	?	0	525	Calibration	-	1582	15.8551	6903.49	0	?	0	525	Calibration	-	1582	15.8572	5570.56	0	?	0	525	Calibration	-	1582	15.8551	5005.77	0	?
1583	15.8658	10263	0	?	0	525	Calibration	-	1583	15.8679	19345.3	0	?	0	525	Calibration	-	1583	15.8651	6960.02	0	?	0	525	Calibration	-	1583	15.8651	6886.29	0	?	0	525	Calibration	-	1583	15.8672	5571.01	0	?	0	525	Calibration	-	1583	15.8651	5012.48	0	?
1584	15.8758	10243.7	0	?	0	525	Calibration	-	1584	15.8779	19379	0	?	0	525	Calibration	-	1584	15.8751	6977.52	0	?	0	525	Calibration	-	1584	15.8751	6903.67	0	?	0	525	Calibration	-	1584	15.8772	5578.33	0	?	0	525	Calibration	-	1584	15.8751	5004.31	0	?
1585	15.8859	10277.5	0	?	0	525	Calibration	-	1585	15.8879	19346.5	0	?	0	525	Calibration	-	1585	15.8852	6969.45	0	?	0	525	Calibration	-	1585	15.8852	6889.46	0	?	0	525	Calibration	-	1585	15.8872	5574.04	0	?	0	525	Calibration	-	1585	15.8852	4996.83	0	?
1586	15.8959	10283.8	0	?	0	525	Calibration	-	1586	15.898	19293.6	0	?	0	525	Calibration	-	1586	15.8952	6972.68	0	?	0	525	Calibration	-	1586	15.8952	6887.64	0	?	0	525	Calibration	-	1586	15.8973	5571.4	0	?	0	525	Calibration	-	1586	15.8952	5003.2	0	?
1587	15.9059	10443	0	?	0	525	Calibration	-	1587	15.908	19374.2	0	?	0	525	Calibration	-	1587	15.9052	6976.78	0	?	0	525	Calibration	-	1587	15.9052	6901.79	0	?	0	525	Calibration	-	1587	15.9073	5568.46	0	?	0	525	Calibration	-	1587	15.9052	5003.28	0	?
1588	15.9159	10498.6	0	?	0	525	Calibration	-	1588	15.918	19403.7	0	?	0	525	Calibration	-	1588	15.9152	6984.12	0	?	0	525	Calibration	-	1588	15.9152	6921.99	0	?	0	525	Calibration	-	1588	15.9173	5569.92	0	?	0	525	Calibration	-	1588	15.9152	4997.68	0	?
1589	15.9259	10497.7	0	?	0	525	Calibration	-	1589	15.928	19342.5	0	?	0	525	Calibration	-	1589	15.9252	6983.92	0	?	0	525	Calibration	-	1589	15.9252	6920.76	0	?	0	525	Calibration	-	1589	15.9273	5564.25	0	?	0	525	Calibration	-	1589	15.9252	5007.88	0	?
1590	15.9359	10496.1	0	?	0	525	Calibration	-	1590	15.938	19344.2	0	?	0	525	Calibration	-	1590	15.9352	6977.22	0	?	0	525	Calibration	-	1590	15.9352	6909.36	0	?	0	525	Calibration	-	1590	15.9373	5569.6	0	?	0	525	Calibration	-	1590	15.9352	4991.57	0	?
1591	15.9459	10536	0	?	0	525	Calibration	-	1591	15.9481	19400.8	0	?	0	525	Calibration	-	1591	15.9452	6975.07	0	?	0	525	Calibration	-	1591	15.9452	6912.98	0	?	0	525	Calibration	-	1591	15.9474	5563.9	0	?	0	525	Calibration	-	1591	15.9452	5001.23	0	?
1592	15.956	10461.6	0	?	0	525	Calibration	-	1592	15.9581	19472.9	0	?	0	525	Calibration	-	1592	15.9553	6987.59	0	?	0	525	Calibration	-	1592	15.9553	6914.56	0	?	0	525	Calibration	-	1592	15.9574	5564.08	0	?	0	525	Calibration	-	1592	15.9553	5000.89	0	?
1593	15.966	10375.1	0	?	0	525	Calibration	-	1593	15.9681	19400.2	0	?	0	525	Calibration	-	1593	15.9653	6986.74	0	?	0	525	Calibration	-	1593	15.9653	6906.86	0	?	0	525	Calibration	-	1593	15.9674	5556.13	0	?	0	525	Calibration	-	1593	15.9653	5005.43	0	?
1594	15.976	10250.3	0	?	0	525	Calibration	-	1594	15.9781	19316.1	0	?	0	525	Calibration	-	1594	15.9753	7000.99	0	?	0	525	Calibration	-	1594	15.9753	6902.63	0	?	0	525	Calibration	-	1594	15.9774	5548.86	0	?	0	525	Calibration	-	1594	15.9753	4997.93	0	?
1595	15.986	10281.9	0	?	0	525	Calibration	-	1595	15.9881	19385.5	0	?	0	525	Calibration	-	1595	15.9853	7007.8	0	?	0	525	Calibration	-	1595	15.9853	6901.12	0	?	0	525	Calibration	-	1595	15.9874	5568.67	0	?	0	525	Calibration	-	1595	15.9853	4995.38	0	?
1596	15.996	10353.6	0	?	0	525	Calibration	-	1596	15.9981	19384.6	0	?	0	525	Calibration	-	1596	15.9953	6993.56	0	?	0	525	Calibration	-	1596	15.9953	6922.43	0	?	0	525	Calibration	-	1596	15.9974	5580.81	0	?	0	525	Calibration	-	1596	15.9953	5008.03	0	?
1597	16.006	10391.6	0	?	0	525	Calibration	-	1597	16.0082	19354.6	0	?	0	525	Calibration	-	1597	16.0053	7000.47	0	?	0	525	Calibration	-	1597	16.0053	6918.4	0	?	0	525	Calibration	-	1597	16.0075	5569.61	0	?	0	525	Calibration	-	1597	16.0053	4997.5	0	?
1598	16.0161	10366.5	0	?	0	525	Calibration	-	1598	16.0182	19377.5	0	?	0	525	Calibration	-	1598	16.0154	7005.33	0	?	0	525	Calibration	-	1598	16.0154	6910.25	0	?	0	525	Calibration	-	1598	16.0175	5560.22	0	?	0	525	Calibration	-	1598	16.0154	5004.38	0	?
1599	16.0261	10330.1	0	?	0	525	Calibration	-	1599	16.0282	19454.7	0	?	0	525	Calibration	-	1599	16.0254	6984.44	0	?	0	525	Calibration	-	1599	16.0254	6894.8	0	?	0	525	Calibration	-	1599	16.0275	5566.31	0	?	0	525	Calibration	-	1599	16.0254	5008.23	0	?
1600	16.0361	10320.2	0	?	0	525	Calibration	-	1600	16.0382	19429.7	0	?	0	525	Calibration	-	1600	16.0354	6970.9	0	?	0	525	Calibration	-	1600	16.0354	6914.82	0	?	0	525	Calibration	-	1600	16.0375	5585.47	0	?	0	525	Calibration	-	1600	16.0354	5005.36	0	?
1601	16.0461	10313.6	0	?	0	525	Calibration	-	1601	16.0482	19308.3	0	?	0	525	Calibration	-	1601	16.0454	6975.97	0	?	0	525	Calibration	-	1601	16.0454	6900.53	0	?	0	525	Calibration	-	1601	16.0475	5584.51	0	?	0	525	Calibration	-	1601	16.0454	4995.1	0	?
1602	16.0561	10345.5	0	?	0	525	Calibration	-	1602	16.0582	19260.5	0	?	0	525	Calibration	-	1602	16.0554	6990.03	0	?	0	525	Calibration	-	1602	16.0554	6915.55	0	?	0	525	Calibration	-	1602	16.0575	5586.83	0	?	0	525	Calibration	-	1602	16.0554	4987.17	0	?
1603	16.0661	10378.8	0	?	0	525	Calibration	-	1603	16.0683	19243.7	0	?	0	525	Calibration	-	1603	16.0654	7001.25	0	?	0	525	Calibration	-	1603	16.0654	6896.03	0	?	0	525	Calibration	-	1603	16.0676	5592.68	0	?	0	525	Calibration	-	1603	16.0654	5006.7	0	?
1604	16.0762	10318	0	?	0	525	Calibration	-	1604	16.0783	19257.4	0	?	0	525	Calibration	-	1604	16.0755	6979.16	0	?	0	525	Calibration	-	1604	16.0755	6900.79	0	?	0	525	Calibration	-	1604	16.0776	5581.32	0	?	0	525	Calibration	-	1604	16.0755	4983.6	0	?
1605	16.0862	10287.3	0	?	0	525	Calibration	-	1605	16.0883	19345.8	0	?	0	525	Calibration	-	1605	16.0855	6990.74	0	?	0	525	Calibration	-	1605	16.0855	6884.43	0	?	0	525	Calibration	-	1605	16.0876	5560.25	0	?	0	525	Calibration	-	1605	16.0855	5011.48	0	?
1606	16.0962	10249.2	0	?	0	525	Calibration	-	1606	16.0983	19404.3	0	?	0	525	Calibration	-	1606	16.0955	6999.85	0	?	0	525	Calibration	-	1606	16.0955	6894.23	0	?	0	525	Calibration	-	1606	16.0976	5570.3	0	?	0	525	Calibration	-	1606	16.0955	5011.71	0	?
1607	16.1062	10330.9	0	?	0	525	Calibration	-	1607	16.1083	19430	0	?	0	525	Calibration	-	1607	16.1055	6990.49	0	?	0	525	Calibration	-	1607	16.1055	6890.54	0	?	0	525	Calibration	-	1607	16.1076	5561.7	0	?	0	525	Calibration	-	1607	16.1055	4993.59	0	?
1608	16.1162	10309.9	0	?	0	525	Calibration	-	1608	16.1184	19401.4	0	?	0	525	Calibration	-	1608	16.1155	6980.77	0	?	0	525	Calibration	-	1608	16.1155	6873.75	0	?	0	525	Calibration	-	1608	16.1176	5569.66	0	?	0	525	Calibration	-	1608	16.1155	5001.74	0	?
1609	16.1262	10425.8	0	?	0	525	Calibration	-	1609	16.1284	19298.6	0	?	0	525	Calibration	-	1609	16.1255	6976.42	0	?	0	525	Calibration	-	1609	16.1255	6916.7	0	?	0	525	Calibration	-	1609	16.1277	5573.46	0	?	0	525	Calibration	-	1609	16.1255	4998.51	0	?
1610	16.1363	10477.7	0	?	0	525	Calibration	-	1610	16.1384	19264.2	0	?	0	525	Calibration	-	1610	16.1355	6985.43	0	?	0	525	Calibration	-	1610	16.1355	6925.22	0	?	0	525	Calibration	-	1610	16.1377	5573.35	0	?	0	525	Calibration	-	1610	16.1355	5007.32	0	?
1611	16.1463	10394.3	0	?	0	525	Calibration	-	1611	16.1484	19278	0	?	0	525	Calibration	-	1611	16.1456	6999.7	0	?	0	525	Calibration	-	1611	16.1456	6923.11	0	?	0	525	Calibration	-	1611	16.1477	5564.33	0	?	0	525	Calibration	-	1611	16.1456	5008.82	0	?
1612	16.1563	10371.2	0	?	0	525	Calibration	-	1612	16.1584	19306.2	0	?	0	525	Calibration	-	1612	16.1556	6977.42	0	?	0	525	Calibration	-	1612	16.1556	6897.96	0	?	0	525	Calibration	-	1612	16.1577	5573.74	0	?	0	525	Calibration	-	1612	16.1556	4990.09	0	?
1613	16.1663	10394.1	0	?	0	525	Calibration	-	1613	16.1684	19290.3	0	?	0	525	Calibration	-	1613	16.1656	6994.88	0	?	0	525	Calibration	-	1613	16.1656	6902.87	0	?	0	525	Calibration	-	1613	16.1677	5549.36	0	?	0	525	Calibration	-	1613	16.1656	5008.5	0	?
1614	16.1763	10503	0	?	0	525	Calibration	-	1614	16.1785	19334.5	0	?	0	525	Calibration	-	1614	16.1756	6966.24	0	?	0	525	Calibration	-	1614	16.1756	6908.05	0	?	0	525	Calibration	-	1614	16.1777	5580.96	0	?	0	525	Calibration	-	1614	16.1756	4998.86	0	?
1615	16.1863	10707.4	0	?	0	525	Calibration	-	1615	16.1885	19346	0	?	0	525	Calibration	-	1615	16.1856	6980.74	0	?	0	525	Calibration	-	1615	16.1856	6899.92	0	?	0	525	Calibration	-	1615	16.1878	5551.99	0	?	0	525	Calibration	-	1615	16.1856	5004.74	0	?
1616	16.1964	10837	0	?	0	525	Calibration	-	1616	16.1985	19281.3	0	?	0	525	Calibration	-	1616	16.1956	6987.96	0	?	0	525	Calibration	-	1616	16.1956	6894.6	0	?	0	525	Calibration	-	1616	16.1978	5570	0	?	0	525	Calibration	-	1616	16.1956	4992.22	0	?
1617	16.2064	10852.8	0	?	0	525	Calibration	-	1617	16.2085	19249	0	?	0	525	Calibration	-	1617	16.2057	6976.52	0	?	0	525	Calibration	-	1617	16.2057	6899.2	0	?	0	525	Calibration	-	1617	16.2078	5553.05	0	?	0	525	Calibration	-	1617	16.2057	5002.81	0	?
1618	16.2164	10771	0	?	0	525	Calibration	-	1618	16.2185	19250.2	0	?	0	525	Calibration	-	1618	16.2157	6976.9	0	?	0	525	Calibration	-	1618	16.2157	6896.11	0	?	0	525	Calibration	-	1618	16.2178	5576.41	0	?	0	525	Calibration	-	1618	16.2157	5000.07	0	?
1619	16.2264	10691.5	0	?	0	525	Calibration	-	1619	16.2285	19274.2	0	?	0	525	Calibration	-	1619	16.2257	6994.7	0	?	0	525	Calibration	-	1619	16.2257	6905.27	0	?	0	525	Calibration	-	1619	16.2278	5568.66	0	?	0	525	Calibration	-	1619	16.2257	5002	0	?
1620	16.2364	10687.2	0	?	0	525	Calibration	-	1620	16.2386	19259.7	0	?	0	525	Calibration	-	1620	16.2357	6978.74	0	?	0	525	Calibration	-	1620	16.2357	6895.63	0	?	0	525	Calibration	-	1620	16.2378	5578.87	0	?	0	525	Calibration	-	1620	16.2357	5011.66	0	?
1621	16.2464	10785.2	0	?	0	525	Calibration	-	1621	16.2486	19299.3	0	?	0	525	Calibration	-	1621	16.2457	6986.41	0	?	0	525	Calibration	-	1621	16.2457	6905.89	0	?	0	525	Calibration	-	1621	16.2479	5596.43	0	?	0	525	Calibration	-	1621	16.2457	5009.51	0	?
1622	16.2565	10833.3	0	?	0	525	Calibration	-	1622	16.2586	19275.9	0	?	0	525	Calibration	-	1622	16.2557	6985.79	0	?	0	525	Calibration	-	1622	16.2557	6908.65	0	?	0	525	Calibration	-	1622	16.2579	5567.22	0	?	0	525	Calibration	-	1622	16.2557	5000.32	0	?
1623	16.2665	10672.9	0	?	0	525	Calibration	-	1623	16.2686	19251.8	0	?	0	525	Calibration	-	1623	16.2658	6977.74	0	?	0	525	Calibration	-	1623	16.2658	6919.85	0	?	0	525	Calibration	-	1623	16.2679	5588.92	0	?	0	525	Calibration	-	1623	16.2658	5012.57	0	?
1624	16.2765	10636	0	?	0	525	Calibration	-	1624	16.2786	19239.3	0	?	0	525	Calibration	-	1624	16.2758	6980.66	0	?	0	525	Calibration	-	1624	16.2758	6900.74	0	?	0	525	Calibration	-	1624	16.2779	5577.8	0	?	0	525	Calibration	-	1624	16.2758	5003.52	0	?
1625	16.2865	10611.7	0	?	0	525	Calibration	-	1625	16.2887	19172	0	?	0	525	Calibration	-	1625	16.2858	6975.06	0	?	0	525	Calibration	-	1625	16.2858	6902.03	0	?	0	525	Calibration	-	1625	16.2879	5584.85	0	?	0	525	Calibration	-	1625	16.2858	4976.84	0	?
1626	16.2965	10562.2	0	?	0	525	Calibration	-	1626	16.2987	19284.3	0	?	0	525	Calibration	-	1626	16.2958	6967.78	0	?	0	525	Calibration	-	1626	16.2958	6909.15	0	?	0	525	Calibration	-	1626	16.298	5574.32	0	?	0	525	Calibration	-	1626	16.2958	4993.63	0	?
1627	16.3065	10483.1	0	?	0	525	Calibration	-	1627	16.3087	19356.9	0	?	0	525	Calibration	-	1627	16.3058	6979.43	0	?	0	525	Calibration	-	1627	16.3058	6896.02	0	?	0	525	Calibration	-	1627	16.308	5582.49	0	?	0	525	Calibration	-	1627	16.3058	4982.71	0	?
1628	16.3166	10479.5	0	?	0	525	Calibration	-	1628	16.3187	19395.7	0	?	0	525	Calibration	-	1628	16.3158	6988.54	0	?	0	525	Calibration	-	1628	16.3158	6875.09	0	?	0	525	Calibration	-	1628	16.318	5578.99	0	?	0	525	Calibration	-	1628	16.3158	4988.3	0	?
[truncated: 641 more rows]
[truncated: 108 more columns]

## Sheet: ED Figure 8C
Title: 1 Date: 2022/08/26 13:33									Title: 2 Date: 2022/08/26 13:37									Title: 3 Date: 2022/08/26 13:40									Title: 4 Date: 2022/08/26 13:42									Title: 5 Date: 2022/08/26 13:43									Title: 6 Date: 2022/08/26 13:45
[truncated: 2,273 more rows]
[truncated: 87 more columns]

[truncated: 2 more sheets: ED Figure 8D, ED Figure 8E]
