# Supplementary material for: All-optical closed-loop voltage clamp for precise control of muscles and neurons in live animals
Source: Research Square preprint supplement (doi:10.21203/rs.3.rs-1505565/v1), 2023-03-29
Supplement: Supplementary file 9 [file 8261fe32a0ed80ba10524f8f.xlsx]

## Sheet: 3 A
wild type																								unc-13
Time	dF/F0_bleach_correct	Wavelength	dF/F0_bleach_correct	Wavelength	dF/F0_bleach_correct	Wavelength	dF/F0_bleach_correct	Wavelength	dF/F0_bleach_correct	Wavelength	dF/F0_bleach_correct	Wavelength	dF/F0_bleach_correct	Wavelength	dF/F0_bleach_correct	Wavelength	dF/F0_bleach_correct	Wavelength	Wavelength	SEM	DF/F0	SEM		Time	dF/F0_bleach_correct	Wavelength	dF/F0_bleach_correct	Wavelength	dF/F0_bleach_correct	Wavelength	dF/F0_bleach_correct	Wavelength	dF/F0_bleach_correct	Wavelength	dF/F0_bleach_correct	Wavelength	dF/F0_bleach_correct	Wavelength	dF/F0_bleach_correct	Wavelength	dF/F0_bleach_correct	Wavelength	dF/F0_bleach_correct	Wavelength	wavelength	SEM	DF/F0	SEM
0.0111	0	510	0	510	0	510	0	510	0	510	0	510	0	510	0	510	0	510	510	0	0	0		0.0111	0	510	0	510	0	510	0	510	0	510	0	510	0	510	0	510	0	510	0	510	510	0	0	0
0.0222	0	510	0	510	0	510	0	510	0	510	0	510	0	510	0	510	0	510	510	0	0	0		0.0222	0	510	0	510	0	510	0	510	0	510	0	510	0	510	0	510	0	510	0	510	510	0	0	0
0.0332	0	510	0	510	0	510	0	510	0	510	0	510	0	510	0	510	0	510	510	0	0	0		0.0332	0	510	0	510	0	510	0	510	0	510	0	510	0	510	0	510	0	510	0	510	510	0	0	0
0.0443	0	510	0	510	0	510	0	510	0	510	0	510	0	510	0	510	0	510	510	0	0	0		0.0443	0	510	0	510	0	510	0	510	0	510	0	510	0	510	0	510	0	510	0	510	510	0	0	0
0.0554	0	510	0	510	0	510	0	510	0	510	0	510	0	510	0	510	0	510	510	0	0	0		0.0554	0	510	0	510	0	510	0	510	0	510	0	510	0	510	0	510	0	510	0	510	510	0	0	0
0.0665	0	510	0	510	0	510	0	510	0	510	0	510	0	510	0	510	0	510	510	0	0	0		0.0665	0	510	0	510	0	510	0	510	0	510	0	510	0	510	0	510	0	510	0	510	510	0	0	0
0.0775	0	510	0	510	0	510	0	510	0	510	0	510	0	510	0	510	0	510	510	0	0	0		0.0775	0	510	0	510	0	510	0	510	0	510	0	510	0	510	0	510	0	510	0	510	510	0	0	0
0.0886	0	510	0	510	0	510	0	510	0	510	0	510	0	510	0	510	0	510	510	0	0	0		0.0886	0	510	0	510	0	510	0	510	0	510	0	510	0	510	0	510	0	510	0	510	510	0	0	0
0.0997	0	510	0	510	0	510	0	510	0	510	0	510	0	510	0	510	0	510	510	0	0	0		0.0997	0	510	0	510	0	510	0	510	0	510	0	510	0	510	0	510	0	510	0	510	510	0	0	0
0.1108	0	510	0	510	0	510	0	510	0	510	0	510	0	510	0	510	0	510	510	0	0	0		0.1108	0	510	0	510	0	510	0	510	0	510	0	510	0	510	0	510	0	510	0	510	510	0	0	0
0.1218	0	510	0	510	0	510	0	510	0	510	0	510	0	510	0	510	0	510	510	0	0	0		0.1218	0	510	0	510	0	510	0	510	0	510	0	510	0	510	0	510	0	510	0	510	510	0	0	0
0.1329	0	510	0	510	0	510	0	510	0	510	0	510	0	510	0	510	0	510	510	0	0	0		0.1329	0	510	0	510	0	510	0	510	0	510	0	510	0	510	0	510	0	510	0	510	510	0	0	0
0.144	0	510	0	510	0	510	0	510	0	510	0	510	0	510	0	510	0	510	510	0	0	0		0.144	0	510	0	510	0	510	0	510	0	510	0	510	0	510	0	510	0	510	0	510	510	0	0	0
0.1551	0	510	0	510	0	510	0	510	0	510	0	510	0	510	0	510	0	510	510	0	0	0		0.1551	0	510	0	510	0	510	0	510	0	510	0	510	0	510	0	510	0	510	0	510	510	0	0	0
0.1661	0	510	0	510	0	510	0	510	0	510	0	510	0	510	0	510	0	510	510	0	0	0		0.1661	0	510	0	510	0	510	0	510	0	510	0	510	0	510	0	510	0	510	0	510	510	0	0	0
0.1772	0	510	0	510	0	510	0	510	0	510	0	510	0	510	0	510	0	510	510	0	0	0		0.1772	0	510	0	510	0	510	0	510	0	510	0	510	0	510	0	510	0	510	0	510	510	0	0	0
0.1883	0	510	0	510	0	510	0	510	0	510	0	510	0	510	0	510	0	510	510	0	0	0		0.1883	0	510	0	510	0	510	0	510	0	510	0	510	0	510	0	510	0	510	0	510	510	0	0	0
0.1994	0	510	0	510	0	510	0	510	0	510	0	510	0	510	0	510	0	510	510	0	0	0		0.1994	0	510	0	510	0	510	0	510	0	510	0	510	0	510	0	510	0	510	0	510	510	0	0	0
0.2105	0	510	0	510	0	510	0	510	0	510	0	510	0	510	0	510	0	510	510	0	0	0		0.2105	0	510	0	510	0	510	0	510	0	510	0	510	0	510	0	510	0	510	0	510	510	0	0	0
0.2215	0	510	0	510	0	510	0	510	0	510	0	510	0	510	0	510	0	510	510	0	0	0		0.2215	0	510	0	510	0	510	0	510	0	510	0	510	0	510	0	510	0	510	0	510	510	0	0	0
0.2326	0	510	0	510	0	510	0	510	0	510	0	510	0	510	0	510	0	510	510	0	0	0		0.2326	0	510	0	510	0	510	0	510	0	510	0	510	0	510	0	510	0	510	0	510	510	0	0	0
0.2437	0	510	0	510	0	510	0	510	0	510	0	510	0	510	0	510	0	510	510	0	0	0		0.2437	0	510	0	510	0	510	0	510	0	510	0	510	0	510	0	510	0	510	0	510	510	0	0	0
0.2548	0	510	0	510	0	510	0	510	0	510	0	510	0	510	0	510	0	510	510	0	0	0		0.2548	0	510	0	510	0	510	0	510	0	510	0	510	0	510	0	510	0	510	0	510	510	0	0	0
0.2658	0	510	0	510	0	510	0	510	0	510	0	510	0	510	0	510	0	510	510	0	0	0		0.2658	0	510	0	510	0	510	0	510	0	510	0	510	0	510	0	510	0	510	0	510	510	0	0	0
0.2769	0	510	0	510	0	510	0	510	0	510	0	510	0	510	0	510	0	510	510	0	0	0		0.2769	0	510	0	510	0	510	0	510	0	510	0	510	0	510	0	510	0	510	0	510	510	0	0	0
0.288	0	510	0	510	0	510	0	510	0	510	0	510	0	510	0	510	0	510	510	0	0	0		0.288	0	510	0	510	0	510	0	510	0	510	0	510	0	510	0	510	0	510	0	510	510	0	0	0
0.2991	0	510	0	510	0	510	0	510	0	510	0	510	0	510	0	510	0	510	510	0	0	0		0.2991	0	510	0	510	0	510	0	510	0	510	0	510	0	510	0	510	0	510	0	510	510	0	0	0
0.3101	0	510	0	510	0	510	0	510	0	510	0	510	0	510	0	510	0	510	510	0	0	0		0.3101	0	510	0	510	0	510	0	510	0	510	0	510	0	510	0	510	0	510	0	510	510	0	0	0
0.3212	0	510	0	510	0	510	0	510	0	510	0	510	0	510	0	510	0	510	510	0	0	0		0.3212	0	510	0	510	0	510	0	510	0	510	0	510	0	510	0	510	0	510	0	510	510	0	0	0
0.3323	0	510	0	510	0	510	0	510	0	510	0	510	0	510	0	510	0	510	510	0	0	0		0.3323	0	510	0	510	0	510	0	510	0	510	0	510	0	510	0	510	0	510	0	510	510	0	0	0
0.3434	0	510	0	510	0	510	0	510	0	510	0	510	0	510	0	510	0	510	510	0	0	0		0.3434	0	510	0	510	0	510	0	510	0	510	0	510	0	510	0	510	0	510	0	510	510	0	0	0
0.3545	0	510	0	510	0	510	0	510	0	510	0	510	0	510	0	510	0	510	510	0	0	0		0.3545	0	510	0	510	0	510	0	510	0	510	0	510	0	510	0	510	0	510	0	510	510	0	0	0
0.3655	0	510	0	510	0	510	0	510	0	510	0	510	0	510	0	510	0	510	510	0	0	0		0.3655	0	510	0	510	0	510	0	510	0	510	0	510	0	510	0	510	0	510	0	510	510	0	0	0
0.3766	0	510	0	510	0	510	0	510	0	510	0	510	0	510	0	510	0	510	510	0	0	0		0.3766	0	510	0	510	0	510	0	510	0	510	0	510	0	510	0	510	0	510	0	510	510	0	0	0
0.3877	0	510	0	510	0	510	0	510	0	510	0	510	0	510	0	510	0	510	510	0	0	0		0.3877	0	510	0	510	0	510	0	510	0	510	0	510	0	510	0	510	0	510	0	510	510	0	0	0
0.3988	0	510	0	510	0	510	0	510	0	510	0	510	0	510	0	510	0	510	510	0	0	0		0.3988	0	510	0	510	0	510	0	510	0	510	0	510	0	510	0	510	0	510	0	510	510	0	0	0
0.4098	0	510	0	510	0	510	0	510	0	510	0	510	0	510	0	510	0	510	510	0	0	0		0.4098	0	510	0	510	0	510	0	510	0	510	0	510	0	510	0	510	0	510	0	510	510	0	0	0
0.4209	0	510	0	510	0	510	0	510	0	510	0	510	0	510	0	510	0	510	510	0	0	0		0.4209	0	510	0	510	0	510	0	510	0	510	0	510	0	510	0	510	0	510	0	510	510	0	0	0
0.432	0	510	0	510	0	510	0	510	0	510	0	510	0	510	0	510	0	510	510	0	0	0		0.432	0	510	0	510	0	510	0	510	0	510	0	510	0	510	0	510	0	510	0	510	510	0	0	0
0.4431	0	510	0	510	0	510	0	510	0	510	0	510	0	510	0	510	0	510	510	0	0	0		0.4431	0	510	0	510	0	510	0	510	0	510	0	510	0	510	0	510	0	510	0	510	510	0	0	0
0.4541	0	510	0	510	0	510	0	510	0	510	0	510	0	510	0	510	0	510	510	0	0	0		0.4541	0	510	0	510	0	510	0	510	0	510	0	510	0	510	0	510	0	510	0	510	510	0	0	0
0.4652	0	510	0	510	0	510	0	510	0	510	0	510	0	510	0	510	0	510	510	0	0	0		0.4652	0	510	0	510	0	510	0	510	0	510	0	510	0	510	0	510	0	510	0	510	510	0	0	0
0.4763	0	510	0	510	0	510	0	510	0	510	0	510	0	510	0	510	0	510	510	0	0	0		0.4763	0	510	0	510	0	510	0	510	0	510	0	510	0	510	0	510	0	510	0	510	510	0	0	0
0.4874	0	510	0	510	0	510	0	510	0	510	0	510	0	510	0	510	0	510	510	0	0	0		0.4874	0	510	0	510	0	510	0	510	0	510	0	510	0	510	0	510	0	510	0	510	510	0	0	0
0.4984	0	510	0	510	0	510	0	510	0	510	0	510	0	510	0	510	0	510	510	0	0	0		0.4984	0	510	0	510	0	510	0	510	0	510	0	510	0	510	0	510	0	510	0	510	510	0	0	0
0.5095	0	510	0	510	0	510	0	510	0	510	0	510	0	510	0	510	0	510	510	0	0	0		0.5095	0	510	0	510	0	510	0	510	0	510	0	510	0	510	0	510	0	510	0	510	510	0	0	0
0.5206	0	510	0	510	0	510	0	510	0	510	0	510	0	510	0	510	0	510	510	0	0	0		0.5206	0	510	0	510	0	510	0	510	0	510	0	510	0	510	0	510	0	510	0	510	510	0	0	0
0.5317	0	510	0	510	0	510	0	510	0	510	0	510	0	510	0	510	0	510	510	0	0	0		0.5317	0	510	0	510	0	510	0	510	0	510	0	510	0	510	0	510	0	510	0	510	510	0	0	0
0.5428	0	510	0	510	0	510	0	510	0	510	0	510	0	510	0	510	0	510	510	0	0	0		0.5428	0	510	0	510	0	510	0	510	0	510	0	510	0	510	0	510	0	510	0	510	510	0	0	0
0.5538	0	510	0	510	0	510	0	510	0	510	0	510	0	510	0	510	0	510	510	0	0	0		0.5538	0	510	0	510	0	510	0	510	0	510	0	510	0	510	0	510	0	510	0	510	510	0	0	0
0.5649	0	510	0	510	0	510	0	510	0	510	0	510	0	510	0	510	0	510	510	0	0	0		0.5649	0	510	0	510	0	510	0	510	0	510	0	510	0	510	0	510	0	510	0	510	510	0	0	0
0.576	0	510	0	510	0	510	0	510	0	510	0	510	0	510	0	510	0	510	510	0	0	0		0.576	0	510	0	510	0	510	0	510	0	510	0	510	0	510	0	510	0	510	0	510	510	0	0	0
0.5871	0	510	0	510	0	510	0	510	0	510	0	510	0	510	0	510	0	510	510	0	0	0		0.5871	0	510	0	510	0	510	0	510	0	510	0	510	0	510	0	510	0	510	0	510	510	0	0	0
0.5981	0	510	0	510	0	510	0	510	0	510	0	510	0	510	0	510	0	510	510	0	0	0		0.5981	0	510	0	510	0	510	0	510	0	510	0	510	0	510	0	510	0	510	0	510	510	0	0	0
0.6092	0	510	0	510	0	510	0	510	0	510	0	510	0	510	0	510	0	510	510	0	0	0		0.6092	0	510	0	510	0	510	0	510	0	510	0	510	0	510	0	510	0	510	0	510	510	0	0	0
0.6203	0	510	0	510	0	510	0	510	0	510	0	510	0	510	0	510	0	510	510	0	0	0		0.6203	0	510	0	510	0	510	0	510	0	510	0	510	0	510	0	510	0	510	0	510	510	0	0	0
0.6314	0	510	0	510	0	510	0	510	0	510	0	510	0	510	0	510	0	510	510	0	0	0		0.6314	0	510	0	510	0	510	0	510	0	510	0	510	0	510	0	510	0	510	0	510	510	0	0	0
0.6424	0	510	0	510	0	510	0	510	0	510	0	510	0	510	0	510	0	510	510	0	0	0		0.6424	0	510	0	510	0	510	0	510	0	510	0	510	0	510	0	510	0	510	0	510	510	0	0	0
0.6535	0	510	0	510	0	510	0	510	0	510	0	510	0	510	0	510	0	510	510	0	0	0		0.6535	0	510	0	510	0	510	0	510	0	510	0	510	0	510	0	510	0	510	0	510	510	0	0	0
0.6646	0	510	0	510	0	510	0	510	0	510	0	510	0	510	0	510	0	510	510	0	0	0		0.6646	0	510	0	510	0	510	0	510	0	510	0	510	0	510	0	510	0	510	0	510	510	0	0	0
0.6757	0	510	0	510	0	510	0	510	0	510	0	510	0	510	0	510	0	510	510	0	0	0		0.6757	0	510	0	510	0	510	0	510	0	510	0	510	0	510	0	510	0	510	0	510	510	0	0	0
0.6868	0	510	0	510	0	510	0	510	0	510	0	510	0	510	0	510	0	510	510	0	0	0		0.6868	0	510	0	510	0	510	0	510	0	510	0	510	0	510	0	510	0	510	0	510	510	0	0	0
0.6978	0	510	0	510	0	510	0	510	0	510	0	510	0	510	0	510	0	510	510	0	0	0		0.6978	0	510	0	510	0	510	0	510	0	510	0	510	0	510	0	510	0	510	0	510	510	0	0	0
0.7089	0	510	0	510	0	510	0	510	0	510	0	510	0	510	0	510	0	510	510	0	0	0		0.7089	0	510	0	510	0	510	0	510	0	510	0	510	0	510	0	510	0	510	0	510	510	0	0	0
0.72	0	510	0	510	0	510	0	510	0	510	0	510	0	510	0	510	0	510	510	0	0	0		0.72	0	510	0	510	0	510	0	510	0	510	0	510	0	510	0	510	0	510	0	510	510	0	0	0
0.7311	0	510	0	510	0	510	0	510	0	510	0	510	0	510	0	510	0	510	510	0	0	0		0.7311	0	510	0	510	0	510	0	510	0	510	0	510	0	510	0	510	0	510	0	510	510	0	0	0
0.7421	0	510	0	510	0	510	0	510	0	510	0	510	0	510	0	510	0	510	510	0	0	0		0.7421	0	510	0	510	0	510	0	510	0	510	0	510	0	510	0	510	0	510	0	510	510	0	0	0
0.7532	0	510	0	510	0	510	0	510	0	510	0	510	0	510	0	510	0	510	510	0	0	0		0.7532	0	510	0	510	0	510	0	510	0	510	0	510	0	510	0	510	0	510	0	510	510	0	0	0
0.7643	0	510	0	510	0	510	0	510	0	510	0	510	0	510	0	510	0	510	510	0	0	0		0.7643	0	510	0	510	0	510	0	510	0	510	0	510	0	510	0	510	0	510	0	510	510	0	0	0
0.7754	0	510	0	510	0	510	0	510	0	510	0	510	0	510	0	510	0	510	510	0	0	0		0.7754	0	510	0	510	0	510	0	510	0	510	0	510	0	510	0	510	0	510	0	510	510	0	0	0
0.7864	0	510	0	510	0	510	0	510	0	510	0	510	0	510	0	510	0	510	510	0	0	0		0.7864	0	510	0	510	0	510	0	510	0	510	0	510	0	510	0	510	0	510	0	510	510	0	0	0
0.7975	0	510	0	510	0	510	0	510	0	510	0	510	0	510	0	510	0	510	510	0	0	0		0.7975	0	510	0	510	0	510	0	510	0	510	0	510	0	510	0	510	0	510	0	510	510	0	0	0
0.8086	0	510	0	510	0	510	0	510	0	510	0	510	0	510	0	510	0	510	510	0	0	0		0.8086	0	510	0	510	0	510	0	510	0	510	0	510	0	510	0	510	0	510	0	510	510	0	0	0
0.8197	0	510	0	510	0	510	0	510	0	510	0	510	0	510	0	510	0	510	510	0	0	0		0.8197	0	510	0	510	0	510	0	510	0	510	0	510	0	510	0	510	0	510	0	510	510	0	0	0
0.8307	0	510	0	510	0	510	0	510	0	510	0	510	0	510	0	510	0	510	510	0	0	0		0.8307	0	510	0	510	0	510	0	510	0	510	0	510	0	510	0	510	0	510	0	510	510	0	0	0
0.8418	0	510	0	510	0	510	0	510	0	510	0	510	0	510	0	510	0	510	510	0	0	0		0.8418	0	510	0	510	0	510	0	510	0	510	0	510	0	510	0	510	0	510	0	510	510	0	0	0
0.8529	0	510	0	510	0	510	0	510	0	510	0	510	0	510	0	510	0	510	510	0	0	0		0.8529	0	510	0	510	0	510	0	510	0	510	0	510	0	510	0	510	0	510	0	510	510	0	0	0
0.864	0	510	0	510	0	510	0	510	0	510	0	510	0	510	0	510	0	510	510	0	0	0		0.864	0	510	0	510	0	510	0	510	0	510	0	510	0	510	0	510	0	510	0	510	510	0	0	0
0.8751	0	510	0	510	0	510	0	510	0	510	0	510	0	510	0	510	0	510	510	0	0	0		0.8751	0	510	0	510	0	510	0	510	0	510	0	510	0	510	0	510	0	510	0	510	510	0	0	0
0.8861	0	510	0	510	0	510	0	510	0	510	0	510	0	510	0	510	0	510	510	0	0	0		0.8861	0	510	0	510	0	510	0	510	0	510	0	510	0	510	0	510	0	510	0	510	510	0	0	0
0.8972	0	510	0	510	0	510	0	510	0	510	0	510	0	510	0	510	0	510	510	0	0	0		0.8972	0	510	0	510	0	510	0	510	0	510	0	510	0	510	0	510	0	510	0	510	510	0	0	0
0.9083	0	510	0	510	0	510	0	510	0	510	0	510	0	510	0	510	0	510	510	0	0	0		0.9083	0	510	0	510	0	510	0	510	0	510	0	510	0	510	0	510	0	510	0	510	510	0	0	0
0.9194	0	510	0	510	0	510	0	510	0	510	0	510	0	510	0	510	0	510	510	0	0	0		0.9194	0	510	0	510	0	510	0	510	0	510	0	510	0	510	0	510	0	510	0	510	510	0	0	0
0.9304	0	510	0	510	0	510	0	510	0	510	0	510	0	510	0	510	0	510	510	0	0	0		0.9304	0	510	0	510	0	510	0	510	0	510	0	510	0	510	0	510	0	510	0	510	510	0	0	0
0.9415	0	510	0	510	0	510	0	510	0	510	0	510	0	510	0	510	0	510	510	0	0	0		0.9415	0	510	0	510	0	510	0	510	0	510	0	510	0	510	0	510	0	510	0	510	510	0	0	0
0.9526	0	510	0	510	0	510	0	510	0	510	0	510	0	510	0	510	0	510	510	0	0	0		0.9526	0	510	0	510	0	510	0	510	0	510	0	510	0	510	0	510	0	510	0	510	510	0	0	0
0.9637	0	510	0	510	0	510	0	510	0	510	0	510	0	510	0	510	0	510	510	0	0	0		0.9637	0	510	0	510	0	510	0	510	0	510	0	510	0	510	0	510	0	510	0	510	510	0	0	0
0.9747	0	510	0	510	0	510	0	510	0	510	0	510	0	510	0	510	0	510	510	0	0	0		0.9747	0	510	0	510	0	510	0	510	0	510	0	510	0	510	0	510	0	510	0	510	510	0	0	0
0.9858	0	510	0	510	0	510	0	510	0	510	0	510	0	510	0	510	0	510	510	0	0	0		0.9858	0	510	0	510	0	510	0	510	0	510	0	510	0	510	0	510	0	510	0	510	510	0	0	0
0.9969	0	510	0	510	0	510	0	510	0	510	0	510	0	510	0	510	0	510	510	0	0	0		0.9969	0	510	0	510	0	510	0	510	0	510	0	510	0	510	0	510	0	510	0	510	510	0	0	0
10080	0	510	0	510	0	510	0	510	0	510	0	510	0	510	0	510	0	510	510	0	0	0		10080	0	510	0	510	0	510	0	510	0	510	0	510	0	510	0	510	0	510	0	510	510	0	0	0
10191	0	510	0	510	0	510	0	510	0	510	0	510	0	510	0	510	0	510	510	0	0	0		10191	0	510	0	510	0	510	0	510	0	510	0	510	0	510	0	510	0	510	0	510	510	0	0	0
10301	0	510	0	510	0	510	0	510	0	510	0	510	0	510	0	510	0	510	510	0	0	0		10301	0	510	0	510	0	510	0	510	0	510	0	510	0	510	0	510	0	510	0	510	510	0	0	0
10412	0	510	0	510	0	510	0	510	0	510	0	510	0	510	0	510	0	510	510	0	0	0		10412	0	510	0	510	0	510	0	510	0	510	0	510	0	510	0	510	0	510	0	510	510	0	0	0
10523	0	510	0	510	0	510	0	510	0	510	0	510	0	510	0	510	0	510	510	0	0	0		10523	0	510	0	510	0	510	0	510	0	510	0	510	0	510	0	510	0	510	0	510	510	0	0	0
10634	0	510	0	510	0	510	0	510	0	510	0	510	0	510	0	510	0	510	510	0	0	0		10634	0	510	0	510	0	510	0	510	0	510	0	510	0	510	0	510	0	510	0	510	510	0	0	0
10744	0	510	0	510	0	510	0	510	0	510	0	510	0	510	0	510	0	510	510	0	0	0		10744	0	510	0	510	0	510	0	510	0	510	0	510	0	510	0	510	0	510	0	510	510	0	0	0
10855	0	510	0	510	0	510	0	510	0	510	0	510	0	510	0	510	0	510	510	0	0	0		10855	0	510	0	510	0	510	0	510	0	510	0	510	0	510	0	510	0	510	0	510	510	0	0	0
10966	0	510	0	510	0	510	0	510	0	510	0	510	0	510	0	510	0	510	510	0	0	0		10966	0	510	0	510	0	510	0	510	0	510	0	510	0	510	0	510	0	510	0	510	510	0	0	0
11077	0	510	0	510	0	510	0	510	0	510	0	510	0	510	0	510	0	510	510	0	0	0		11077	0	510	0	510	0	510	0	510	0	510	0	510	0	510	0	510	0	510	0	510	510	0	0	0
11187	0	510	0	510	0	510	0	510	0	510	0	510	0	510	0	510	0	510	510	0	0	0		11187	0	510	0	510	0	510	0	510	0	510	0	510	0	510	0	510	0	510	0	510	510	0	0	0
11298	0	510	0	510	0	510	0	510	0	510	0	510	0	510	0	510	0	510	510	0	0	0		11298	0	510	0	510	0	510	0	510	0	510	0	510	0	510	0	510	0	510	0	510	510	0	0	0
11409	0	510	0	510	0	510	0	510	0	510	0	510	0	510	0	510	0	510	510	0	0	0		11409	0	510	0	510	0	510	0	510	0	510	0	510	0	510	0	510	0	510	0	510	510	0	0	0
11520	0	510	0	510	0	510	0	510	0	510	0	510	0	510	0	510	0	510	510	0	0	0		11520	0	510	0	510	0	510	0	510	0	510	0	510	0	510	0	510	0	510	0	510	510	0	0	0
11630	0	510	0	510	0	510	0	510	0	510	0	510	0	510	0	510	0	510	510	0	0	0		11630	0	510	0	510	0	510	0	510	0	510	0	510	0	510	0	510	0	510	0	510	510	0	0	0
11741	0	510	0	510	0	510	0	510	0	510	0	510	0	510	0	510	0	510	510	0	0	0		11741	0	510	0	510	0	510	0	510	0	510	0	510	0	510	0	510	0	510	0	510	510	0	0	0
11852	0	510	0	510	0	510	0	510	0	510	0	510	0	510	0	510	0	510	510	0	0	0		11852	0	510	0	510	0	510	0	510	0	510	0	510	0	510	0	510	0	510	0	510	510	0	0	0
11963	0	510	0	510	0	510	0	510	0	510	0	510	0	510	0	510	0	510	510	0	0	0		11963	0	510	0	510	0	510	0	510	0	510	0	510	0	510	0	510	0	510	0	510	510	0	0	0
12074	0	510	0	510	0	510	0	510	0	510	0	510	0	510	0	510	0	510	510	0	0	0		12074	0	510	0	510	0	510	0	510	0	510	0	510	0	510	0	510	0	510	0	510	510	0	0	0
12184	0	510	0	510	0	510	0	510	0	510	0	510	0	510	0	510	0	510	510	0	0	0		12184	0	510	0	510	0	510	0	510	0	510	0	510	0	510	0	510	0	510	0	510	510	0	0	0
12295	0	510	0	510	0	510	0	510	0	510	0	510	0	510	0	510	0	510	510	0	0	0		12295	0	510	0	510	0	510	0	510	0	510	0	510	0	510	0	510	0	510	0	510	510	0	0	0
12406	0	510	0	510	0	510	0	510	0	510	0	510	0	510	0	510	0	510	510	0	0	0		12406	0	510	0	510	0	510	0	510	0	510	0	510	0	510	0	510	0	510	0	510	510	0	0	0
12517	0	510	0	510	0	510	0	510	0	510	0	510	0	510	0	510	0	510	510	0	0	0		12517	0	510	0	510	0	510	0	510	0	510	0	510	0	510	0	510	0	510	0	510	510	0	0	0
12627	0	510	0	510	0	510	0	510	0	510	0	510	0	510	0	510	0	510	510	0	0	0		12627	0	510	0	510	0	510	0	510	0	510	0	510	0	510	0	510	0	510	0	510	510	0	0	0
12738	0	510	0	510	0	510	0	510	0	510	0	510	0	510	0	510	0	510	510	0	0	0		12738	0	510	0	510	0	510	0	510	0	510	0	510	0	510	0	510	0	510	0	510	510	0	0	0
12849	0	510	0	510	0	510	0	510	0	510	0	510	0	510	0	510	0	510	510	0	0	0		12849	0	510	0	510	0	510	0	510	0	510	0	510	0	510	0	510	0	510	0	510	510	0	0	0
12960	0	510	0	510	0	510	0	510	0	510	0	510	0	510	0	510	0	510	510	0	0	0		12960	0	510	0	510	0	510	0	510	0	510	0	510	0	510	0	510	0	510	0	510	510	0	0	0
13070	0	510	0	510	0	510	0	510	0	510	0	510	0	510	0	510	0	510	510	0	0	0		13070	0	510	0	510	0	510	0	510	0	510	0	510	0	510	0	510	0	510	0	510	510	0	0	0
13181	0	510	0	510	0	510	0	510	0	510	0	510	0	510	0	510	0	510	510	0	0	0		13181	0	510	0	510	0	510	0	510	0	510	0	510	0	510	0	510	0	510	0	510	510	0	0	0
13292	0	510	0	510	0	510	0	510	0	510	0	510	0	510	0	510	0	510	510	0	0	0		13292	0	510	0	510	0	510	0	510	0	510	0	510	0	510	0	510	0	510	0	510	510	0	0	0
13403	0	510	0	510	0	510	0	510	0	510	0	510	0	510	0	510	0	510	510	0	0	0		13403	0	510	0	510	0	510	0	510	0	510	0	510	0	510	0	510	0	510	0	510	510	0	0	0
13513	0	510	0	510	0	510	0	510	0	510	0	510	0	510	0	510	0	510	510	0	0	0		13513	0	510	0	510	0	510	0	510	0	510	0	510	0	510	0	510	0	510	0	510	510	0	0	0
13624	0	510	0	510	0	510	0	510	0	510	0	510	0	510	0	510	0	510	510	0	0	0		13624	0	510	0	510	0	510	0	510	0	510	0	510	0	510	0	510	0	510	0	510	510	0	0	0
13735	0	510	0	510	0	510	0	510	0	510	0	510	0	510	0	510	0	510	510	0	0	0		13735	0	510	0	510	0	510	0	510	0	510	0	510	0	510	0	510	0	510	0	510	510	0	0	0
13846	0	510	0	510	0	510	0	510	0	510	0	510	0	510	0	510	0	510	510	0	0	0		13846	0	510	0	510	0	510	0	510	0	510	0	510	0	510	0	510	0	510	0	510	510	0	0	0
13957	0	510	0	510	0	510	0	510	0	510	0	510	0	510	0	510	0	510	510	0	0	0		13957	0	510	0	510	0	510	0	510	0	510	0	510	0	510	0	510	0	510	0	510	510	0	0	0
14067	0	510	0	510	0	510	0	510	0	510	0	510	0	510	0	510	0	510	510	0	0	0		14067	0	510	0	510	0	510	0	510	0	510	0	510	0	510	0	510	0	510	0	510	510	0	0	0
14178	0	510	0	510	0	510	0	510	0	510	0	510	0	510	0	510	0	510	510	0	0	0		14178	0	510	0	510	0	510	0	510	0	510	0	510	0	510	0	510	0	510	0	510	510	0	0	0
14289	0	510	0	510	0	510	0	510	0	510	0	510	0	510	0	510	0	510	510	0	0	0		14289	0	510	0	510	0	510	0	510	0	510	0	510	0	510	0	510	0	510	0	510	510	0	0	0
14400	0	510	0	510	0	510	0	510	0	510	0	510	0	510	0	510	0	510	510	0	0	0		14400	0	510	0	510	0	510	0	510	0	510	0	510	0	510	0	510	0	510	0	510	510	0	0	0
14510	0	510	0	510	0	510	0	510	0	510	0	510	0	510	0	510	0	510	510	0	0	0		14510	0	510	0	510	0	510	0	510	0	510	0	510	0	510	0	510	0	510	0	510	510	0	0	0
14621	0	510	0	510	0	510	0	510	0	510	0	510	0	510	0	510	0	510	510	0	0	0		14621	0	510	0	510	0	510	0	510	0	510	0	510	0	510	0	510	0	510	0	510	510	0	0	0
14732	0	510	0	510	0	510	0	510	0	510	0	510	0	510	0	510	0	510	510	0	0	0		14732	0	510	0	510	0	510	0	510	0	510	0	510	0	510	0	510	0	510	0	510	510	0	0	0
14843	0	510	0	510	0	510	0	510	0	510	0	510	0	510	0	510	0	510	510	0	0	0		14843	0	510	0	510	0	510	0	510	0	510	0	510	0	510	0	510	0	510	0	510	510	0	0	0
14953	0	510	0	510	0	510	0	510	0	510	0	510	0	510	0	510	0	510	510	0	0	0		14953	0	510	0	510	0	510	0	510	0	510	0	510	0	510	0	510	0	510	0	510	510	0	0	0
15064	0	510	0	510	0	510	0	510	0	510	0	510	0	510	0	510	0	510	510	0	0	0		15064	0	510	0	510	0	510	0	510	0	510	0	510	0	510	0	510	0	510	0	510	510	0	0	0
15175	0	510	0	510	0	510	0	510	0	510	0	510	0	510	0	510	0	510	510	0	0	0		15175	0	510	0	510	0	510	0	510	0	510	0	510	0	510	0	510	0	510	0	510	510	0	0	0
15286	0	510	0	510	0	510	0	510	0	510	0	510	0	510	0	510	0	510	510	0	0	0		15286	0	510	0	510	0	510	0	510	0	510	0	510	0	510	0	510	0	510	0	510	510	0	0	0
15397	0	510	0	510	0	510	0	510	0	510	0	510	0	510	0	510	0	510	510	0	0	0		15397	0	510	0	510	0	510	0	510	0	510	0	510	0	510	0	510	0	510	0	510	510	0	0	0
15507	0	510	0	510	0	510	0	510	0	510	0	510	0	510	0	510	0	510	510	0	0	0		15507	0	510	0	510	0	510	0	510	0	510	0	510	0	510	0	510	0	510	0	510	510	0	0	0
15618	0	510	0	510	0	510	0	510	0	510	0	510	0	510	0	510	0	510	510	0	0	0		15618	0	510	0	510	0	510	0	510	0	510	0	510	0	510	0	510	0	510	0	510	510	0	0	0
15729	0	510	0	510	0	510	0	510	0	510	0	510	0	510	0	510	0	510	510	0	0	0		15729	0	510	0	510	0	510	0	510	0	510	0	510	0	510	0	510	0	510	0	510	510	0	0	0
15840	0	510	0	510	0	510	0	510	0	510	0	510	0	510	0	510	0	510	510	0	0	0		15840	0	510	0	510	0	510	0	510	0	510	0	510	0	510	0	510	0	510	0	510	510	0	0	0
15950	0	510	0	510	0	510	0	510	0	510	0	510	0	510	0	510	0	510	510	0	0	0		15950	0	510	0	510	0	510	0	510	0	510	0	510	0	510	0	510	0	510	0	510	510	0	0	0
16061	0	510	0	510	0	510	0	510	0	510	0	510	0	510	0	510	0	510	510	0	0	0		16061	0	510	0	510	0	510	0	510	0	510	0	510	0	510	0	510	0	510	0	510	510	0	0	0
16172	0	510	0	510	0	510	0	510	0	510	0	510	0	510	0	510	0	510	510	0	0	0		16172	0	510	0	510	0	510	0	510	0	510	0	510	0	510	0	510	0	510	0	510	510	0	0	0
16283	0	510	0	510	0	510	0	510	0	510	0	510	0	510	0	510	0	510	510	0	0	0		16283	0	510	0	510	0	510	0	510	0	510	0	510	0	510	0	510	0	510	0	510	510	0	0	0
16393	0	510	0	510	0	510	0	510	0	510	0	510	0	510	0	510	0	510	510	0	0	0		16393	0	510	0	510	0	510	0	510	0	510	0	510	0	510	0	510	0	510	0	510	510	0	0	0
16504	0	510	0	510	0	510	0	510	0	510	0	510	0	510	0	510	0	510	510	0	0	0		16504	0	510	0	510	0	510	0	510	0	510	0	510	0	510	0	510	0	510	0	510	510	0	0	0
16615	0	510	0	510	0	510	0	510	0	510	0	510	0	510	0	510	0	510	510	0	0	0		16615	0	510	0	510	0	510	0	510	0	510	0	510	0	510	0	510	0	510	0	510	510	0	0	0
16726	0	510	0	510	0	510	0	510	0	510	0	510	0	510	0	510	0	510	510	0	0	0		16726	0	510	0	510	0	510	0	510	0	510	0	510	0	510	0	510	0	510	0	510	510	0	0	0
16836	0	510	0	510	0	510	0	510	0	510	0	510	0	510	0	510	0	510	510	0	0	0		16836	0	510	0	510	0	510	0	510	0	510	0	510	0	510	0	510	0	510	0	510	510	0	0	0
16947	0	510	0	510	0	510	0	510	0	510	0	510	0	510	0	510	0	510	510	0	0	0		16947	0	510	0	510	0	510	0	510	0	510	0	510	0	510	0	510	0	510	0	510	510	0	0	0
17058	0	510	0	510	0	510	0	510	0	510	0	510	0	510	0	510	0	510	510	0	0	0		17058	0	510	0	510	0	510	0	510	0	510	0	510	0	510	0	510	0	510	0	510	510	0	0	0
17169	0	510	0	510	0	510	0	510	0	510	0	510	0	510	0	510	0	510	510	0	0	0		17169	0	510	0	510	0	510	0	510	0	510	0	510	0	510	0	510	0	510	0	510	510	0	0	0
17280	0	510	0	510	0	510	0	510	0	510	0	510	0	510	0	510	0	510	510	0	0	0		17280	0	510	0	510	0	510	0	510	0	510	0	510	0	510	0	510	0	510	0	510	510	0	0	0
17390	0	510	0	510	0	510	0	510	0	510	0	510	0	510	0	510	0	510	510	0	0	0		17390	0	510	0	510	0	510	0	510	0	510	0	510	0	510	0	510	0	510	0	510	510	0	0	0
17501	0	510	0	510	0	510	0	510	0	510	0	510	0	510	0	510	0	510	510	0	0	0		17501	0	510	0	510	0	510	0	510	0	510	0	510	0	510	0	510	0	510	0	510	510	0	0	0
17612	0	510	0	510	0	510	0	510	0	510	0	510	0	510	0	510	0	510	510	0	0	0		17612	0	510	0	510	0	510	0	510	0	510	0	510	0	510	0	510	0	510	0	510	510	0	0	0
17723	0	510	0	510	0	510	0	510	0	510	0	510	0	510	0	510	0	510	510	0	0	0		17723	0	510	0	510	0	510	0	510	0	510	0	510	0	510	0	510	0	510	0	510	510	0	0	0
17833	0	510	0	510	0	510	0	510	0	510	0	510	0	510	0	510	0	510	510	0	0	0		17833	0	510	0	510	0	510	0	510	0	510	0	510	0	510	0	510	0	510	0	510	510	0	0	0
17944	0	510	0	510	0	510	0	510	0	510	0	510	0	510	0	510	0	510	510	0	0	0		17944	0	510	0	510	0	510	0	510	0	510	0	510	0	510	0	510	0	510	0	510	510	0	0	0
18055	0	510	0	510	0	510	0	510	0	510	0	510	0	510	0	510	0	510	510	0	0	0		18055	0	510	0	510	0	510	0	510	0	510	0	510	0	510	0	510	0	510	0	510	510	0	0	0
18166	0	510	0	510	0	510	0	510	0	510	0	510	0	510	0	510	0	510	510	0	0	0		18166	0	510	0	510	0	510	0	510	0	510	0	510	0	510	0	510	0	510	0	510	510	0	0	0
18276	0	510	0	510	0	510	0	510	0	510	0	510	0	510	0	510	0	510	510	0	0	0		18276	0	510	0	510	0	510	0	510	0	510	0	510	0	510	0	510	0	510	0	510	510	0	0	0
18387	0	510	0	510	0	510	0	510	0	510	0	510	0	510	0	510	0	510	510	0	0	0		18387	0	510	0	510	0	510	0	510	0	510	0	510	0	510	0	510	0	510	0	510	510	0	0	0
18498	0	510	0	510	0	510	0	510	0	510	0	510	0	510	0	510	0	510	510	0	0	0		18498	0	510	0	510	0	510	0	510	0	510	0	510	0	510	0	510	0	510	0	510	510	0	0	0
18609	0	510	0	510	0	510	0	510	0	510	0	510	0	510	0	510	0	510	510	0	0	0		18609	0	510	0	510	0	510	0	510	0	510	0	510	0	510	0	510	0	510	0	510	510	0	0	0
18720	0	510	0	510	0	510	0	510	0	510	0	510	0	510	0	510	0	510	510	0	0	0		18720	0	510	0	510	0	510	0	510	0	510	0	510	0	510	0	510	0	510	0	510	510	0	0	0
18830	0	510	0	510	0	510	0	510	0	510	0	510	0	510	0	510	0	510	510	0	0	0		18830	0	510	0	510	0	510	0	510	0	510	0	510	0	510	0	510	0	510	0	510	510	0	0	0
18941	0	510	0	510	0	510	0	510	0	510	0	510	0	510	0	510	0	510	510	0	0	0		18941	0	510	0	510	0	510	0	510	0	510	0	510	0	510	0	510	0	510	0	510	510	0	0	0
19052	0	510	0	510	0	510	0	510	0	510	0	510	0	510	0	510	0	510	510	0	0	0		19052	0	510	0	510	0	510	0	510	0	510	0	510	0	510	0	510	0	510	0	510	510	0	0	0
19163	0	510	0	510	0	510	0	510	0	510	0	510	0	510	0	510	0	510	510	0	0	0		19163	0	510	0	510	0	510	0	510	0	510	0	510	0	510	0	510	0	510	0	510	510	0	0	0
19273	0	510	0	510	0	510	0	510	0	510	0	510	0	510	0	510	0	510	510	0	0	0		19273	0	510	0	510	0	510	0	510	0	510	0	510	0	510	0	510	0	510	0	510	510	0	0	0
19384	0	510	0	510	0	510	0	510	0	510	0	510	0	510	0	510	0	510	510	0	0	0		19384	0	510	0	510	0	510	0	510	0	510	0	510	0	510	0	510	0	510	0	510	510	0	0	0
19495	0	510	0	510	0	510	0	510	0	510	0	510	0	510	0	510	0	510	510	0	0	0		19495	0	510	0	510	0	510	0	510	0	510	0	510	0	510	0	510	0	510	0	510	510	0	0	0
19606	0	510	0	510	0	510	0	510	0	510	0	510	0	510	0	510	0	510	510	0	0	0		19606	0	510	0	510	0	510	0	510	0	510	0	510	0	510	0	510	0	510	0	510	510	0	0	0
19716	0	510	0	510	0	510	0	510	0	510	0	510	0	510	0	510	0	510	510	0	0	0		19716	0	510	0	510	0	510	0	510	0	510	0	510	0	510	0	510	0	510	0	510	510	0	0	0
19827	0	510	0	510	0	510	0	510	0	510	0	510	0	510	0	510	0	510	510	0	0	0		19827	0	510	0	510	0	510	0	510	0	510	0	510	0	510	0	510	0	510	0	510	510	0	0	0
19938	0	510	0	510	0	510	0	510	0	510	0	510	0	510	0	510	0	510	510	0	0	0		19938	0	510	0	510	0	510	0	510	0	510	0	510	0	510	0	510	0	510	0	510	510	0	0	0
20049	0	510	0	510	0	510	0	510	0	510	0	510	0	510	0	510	0	510	510	0	0	0		20049	0	510	0	510	0	510	0	510	0	510	0	510	0	510	0	510	0	510	0	510	510	0	0	0
20159	0	510	0	510	0	510	0	510	0	510	0	510	0	510	0	510	0	510	510	0	0	0		20159	0	510	0	510	0	510	0	510	0	510	0	510	0	510	0	510	0	510	0	510	510	0	0	0
20270	0	510	0	510	0	510	0	510	0	510	0	510	0	510	0	510	0	510	510	0	0	0		20270	0	510	0	510	0	510	0	510	0	510	0	510	0	510	0	510	0	510	0	510	510	0	0	0
20381	0	510	0	510	0	510	0	510	0	510	0	510	0	510	0	510	0	510	510	0	0	0		20381	0	510	0	510	0	510	0	510	0	510	0	510	0	510	0	510	0	510	0	510	510	0	0	0
20492	0	510	0	510	0	510	0	510	0	510	0	510	0	510	0	510	0	510	510	0	0	0		20492	0	510	0	510	0	510	0	510	0	510	0	510	0	510	0	510	0	510	0	510	510	0	0	0
20603	0	510	0	510	0	510	0	510	0	510	0	510	0	510	0	510	0	510	510	0	0	0		20603	0	510	0	510	0	510	0	510	0	510	0	510	0	510	0	510	0	510	0	510	510	0	0	0
20713	0	510	0	510	0	510	0	510	0	510	0	510	0	510	0	510	0	510	510	0	0	0		20713	0	510	0	510	0	510	0	510	0	510	0	510	0	510	0	510	0	510	0	510	510	0	0	0
20824	0	510	0	510	0	510	0	510	0	510	0	510	0	510	0	510	0	510	510	0	0	0		20824	0	510	0	510	0	510	0	510	0	510	0	510	0	510	0	510	0	510	0	510	510	0	0	0
20935	0	510	0	510	0	510	0	510	0	510	0	510	0	510	0	510	0	510	510	0	0	0		20935	0	510	0	510	0	510	0	510	0	510	0	510	0	510	0	510	0	510	0	510	510	0	0	0
21046	0	510	0	510	0	510	0	510	0	510	0	510	0	510	0	510	0	510	510	0	0	0		21046	0	510	0	510	0	510	0	510	0	510	0	510	0	510	0	510	0	510	0	510	510	0	0	0
21156	0	510	0	510	0	510	0	510	0	510	0	510	0	510	0	510	0	510	510	0	0	0		21156	0	510	0	510	0	510	0	510	0	510	0	510	0	510	0	510	0	510	0	510	510	0	0	0
21267	0	510	0	510	0	510	0	510	0	510	0	510	0	510	0	510	0	510	510	0	0	0		21267	0	510	0	510	0	510	0	510	0	510	0	510	0	510	0	510	0	510	0	510	510	0	0	0
21378	0	510	0	510	0	510	0	510	0	510	0	510	0	510	0	510	0	510	510	0	0	0		21378	0	510	0	510	0	510	0	510	0	510	0	510	0	510	0	510	0	510	0	510	510	0	0	0
21489	0	510	0	510	0	510	0	510	0	510	0	510	0	510	0	510	0	510	510	0	0	0		21489	0	510	0	510	0	510	0	510	0	510	0	510	0	510	0	510	0	510	0	510	510	0	0	0
21599	0	510	0	510	0	510	0	510	0	510	0	510	0	510	0	510	0	510	510	0	0	0		21599	0	510	0	510	0	510	0	510	0	510	0	510	0	510	0	510	0	510	0	510	510	0	0	0
21710	0	510	0	510	0	510	0	510	0	510	0	510	0	510	0	510	0	510	510	0	0	0		21710	0	510	0	510	0	510	0	510	0	510	0	510	0	510	0	510	0	510	0	510	510	0	0	0
21821	0	510	0	510	0	510	0	510	0	510	0	510	0	510	0	510	0	510	510	0	0	0		21821	0	510	0	510	0	510	0	510	0	510	0	510	0	510	0	510	0	510	0	510	510	0	0	0
21932	0	510	0	510	0	510	0	510	0	510	0	510	0	510	0	510	0	510	510	0	0	0		21932	0	510	0	510	0	510	0	510	0	510	0	510	0	510	0	510	0	510	0	510	510	0	0	0
22043	0	510	0	510	0	510	0	510	0	510	0	510	0	510	0	510	0	510	510	0	0	0		22043	0	510	0	510	0	510	0	510	0	510	0	510	0	510	0	510	0	510	0	510	510	0	0	0
22153	0	510	0	510	0	510	0	510	0	510	0	510	0	510	0	510	0	510	510	0	0	0		22153	0	510	0	510	0	510	0	510	0	510	0	510	0	510	0	510	0	510	0	510	510	0	0	0
22264	0	510	0	510	0	510	0	510	0	510	0	510	0	510	0	510	0	510	510	0	0	0		22264	0	510	0	510	0	510	0	510	0	510	0	510	0	510	0	510	0	510	0	510	510	0	0	0
22375	0	510	0	510	0	510	0	510	0	510	0	510	0	510	0	510	0	510	510	0	0	0		22375	0	510	0	510	0	510	0	510	0	510	0	510	0	510	0	510	0	510	0	510	510	0	0	0
22486	0	510	0	510	0	510	0	510	0	510	0	510	0	510	0	510	0	510	510	0	0	0		22486	0	510	0	510	0	510	0	510	0	510	0	510	0	510	0	510	0	510	0	510	510	0	0	0
22596	0	510	0	510	0	510	0	510	0	510	0	510	0	510	0	510	0	510	510	0	0	0		22596	0	510	0	510	0	510	0	510	0	510	0	510	0	510	0	510	0	510	0	510	510	0	0	0
22707	0	510	0	510	0	510	0	510	0	510	0	510	0	510	0	510	0	510	510	0	0	0		22707	0	510	0	510	0	510	0	510	0	510	0	510	0	510	0	510	0	510	0	510	510	0	0	0
22818	0	510	0	510	0	510	0	510	0	510	0	510	0	510	0	510	0	510	510	0	0	0		22818	0	510	0	510	0	510	0	510	0	510	0	510	0	510	0	510	0	510	0	510	510	0	0	0
22929	0	510	0	510	0	510	0	510	0	510	0	510	0	510	0	510	0	510	510	0	0	0		22929	0	510	0	510	0	510	0	510	0	510	0	510	0	510	0	510	0	510	0	510	510	0	0	0
23039	0	510	0	510	0	510	0	510	0	510	0	510	0	510	0	510	0	510	510	0	0	0		23039	0	510	0	510	0	510	0	510	0	510	0	510	0	510	0	510	0	510	0	510	510	0	0	0
23150	0	510	0	510	0	510	0	510	0	510	0	510	0	510	0	510	0	510	510	0	0	0		23150	0	510	0	510	0	510	0	510	0	510	0	510	0	510	0	510	0	510	0	510	510	0	0	0
23261	0	510	0	510	0	510	0	510	0	510	0	510	0	510	0	510	0	510	510	0	0	0		23261	0	510	0	510	0	510	0	510	0	510	0	510	0	510	0	510	0	510	0	510	510	0	0	0
23372	0	510	0	510	0	510	0	510	0	510	0	510	0	510	0	510	0	510	510	0	0	0		23372	0	510	0	510	0	510	0	510	0	510	0	510	0	510	0	510	0	510	0	510	510	0	0	0
23482	0	510	0	510	0	510	0	510	0	510	0	510	0	510	0	510	0	510	510	0	0	0		23482	0	510	0	510	0	510	0	510	0	510	0	510	0	510	0	510	0	510	0	510	510	0	0	0
23593	0	510	0	510	0	510	0	510	0	510	0	510	0	510	0	510	0	510	510	0	0	0		23593	0	510	0	510	0	510	0	510	0	510	0	510	0	510	0	510	0	510	0	510	510	0	0	0
23704	0	510	0	510	0	510	0	510	0	510	0	510	0	510	0	510	0	510	510	0	0	0		23704	0	510	0	510	0	510	0	510	0	510	0	510	0	510	0	510	0	510	0	510	510	0	0	0
23815	0	510	0	510	0	510	0	510	0	510	0	510	0	510	0	510	0	510	510	0	0	0		23815	0	510	0	510	0	510	0	510	0	510	0	510	0	510	0	510	0	510	0	510	510	0	0	0
23926	0	510	0	510	0	510	0	510	0	510	0	510	0	510	0	510	0	510	510	0	0	0		23926	0	510	0	510	0	510	0	510	0	510	0	510	0	510	0	510	0	510	0	510	510	0	0	0
24036	0	510	0	510	0	510	0	510	0	510	0	510	0	510	0	510	0	510	510	0	0	0		24036	0	510	0	510	0	510	0	510	0	510	0	510	0	510	0	510	0	510	0	510	510	0	0	0
24147	0	510	0	510	0	510	0	510	0	510	0	510	0	510	0	510	0	510	510	0	0	0		24147	0	510	0	510	0	510	0	510	0	510	0	510	0	510	0	510	0	510	0	510	510	0	0	0
24258	0	510	0	510	0	510	0	510	0	510	0	510	0	510	0	510	0	510	510	0	0	0		24258	0	510	0	510	0	510	0	510	0	510	0	510	0	510	0	510	0	510	0	510	510	0	0	0
24369	0	510	0	510	0	510	0	510	0	510	0	510	0	510	0	510	0	510	510	0	0	0		24369	0	510	0	510	0	510	0	510	0	510	0	510	0	510	0	510	0	510	0	510	510	0	0	0
24479	0	510	0	510	0	510	0	510	0	510	0	510	0	510	0	510	0	510	510	0	0	0		24479	0	510	0	510	0	510	0	510	0	510	0	510	0	510	0	510	0	510	0	510	510	0	0	0
24590	0	510	0	510	0	510	0	510	0	510	0	510	0	510	0	510	0	510	510	0	0	0		24590	0	510	0	510	0	510	0	510	0	510	0	510	0	510	0	510	0	510	0	510	510	0	0	0
24701	0	510	0	510	0	510	0	510	0	510	0	510	0	510	0	510	0	510	510	0	0	0		24701	0	510	0	510	0	510	0	510	0	510	0	510	0	510	0	510	0	510	0	510	510	0	0	0
24812	0	510	0	510	0	510	0	510	0	510	0	510	0	510	0	510	0	510	510	0	0	0		24812	0	510	0	510	0	510	0	510	0	510	0	510	0	510	0	510	0	510	0	510	510	0	0	0
24922	0	510	0	510	0	510	0	510	0	510	0	510	0	510	0	510	0	510	510	0	0	0		24922	0	510	0	510	0	510	0	510	0	510	0	510	0	510	0	510	0	510	0	510	510	0	0	0
25033	0	510	0	510	0	510	0	510	0	510	0	510	0	510	0	510	0	510	510	0	0	0		25033	0	510	0	510	0	510	0	510	0	510	0	510	0	510	0	510	0	510	0	510	510	0	0	0
25144	0	510	0	510	0	510	0	510	0	510	0	510	0	510	0	510	0	510	510	0	0	0		25144	0	510	0	510	0	510	0	510	0	510	0	510	0	510	0	510	0	510	0	510	510	0	0	0
25255	0	510	0	510	0	510	0	510	0	510	0	510	0	510	0	510	0	510	510	0	0	0		25255	0	510	0	510	0	510	0	510	0	510	0	510	0	510	0	510	0	510	0	510	510	0	0	0
25365	0	510	0	510	0	510	0	510	0	510	0	510	0	510	0	510	0	510	510	0	0	0		25365	0	510	0	510	0	510	0	510	0	510	0	510	0	510	0	510	0	510	0	510	510	0	0	0
25476	0	510	0	510	0	510	0	510	0	510	0	510	0	510	0	510	0	510	510	0	0	0		25476	0	510	0	510	0	510	0	510	0	510	0	510	0	510	0	510	0	510	0	510	510	0	0	0
25587	0	510	0	510	0	510	0	510	0	510	0	510	0	510	0	510	0	510	510	0	0	0		25587	0	510	0	510	0	510	0	510	0	510	0	510	0	510	0	510	0	510	0	510	510	0	0	0
25698	0	510	0	510	0	510	0	510	0	510	0	510	0	510	0	510	0	510	510	0	0	0		25698	0	510	0	510	0	510	0	510	0	510	0	510	0	510	0	510	0	510	0	510	510	0	0	0
25809	0	510	0	510	0	510	0	510	0	510	0	510	0	510	0	510	0	510	510	0	0	0		25809	0	510	0	510	0	510	0	510	0	510	0	510	0	510	0	510	0	510	0	510	510	0	0	0
25919	0	510	0	510	0	510	0	510	0	510	0	510	0	510	0	510	0	510	510	0	0	0		25919	0	510	0	510	0	510	0	510	0	510	0	510	0	510	0	510	0	510	0	510	510	0	0	0
26030	0	510	0	510	0	510	0	510	0	510	0	510	0	510	0	510	0	510	510	0	0	0		26030	0	510	0	510	0	510	0	510	0	510	0	510	0	510	0	510	0	510	0	510	510	0	0	0
26141	0	510	0	510	0	510	0	510	0	510	0	510	0	510	0	510	0	510	510	0	0	0		26141	0	510	0	510	0	510	0	510	0	510	0	510	0	510	0	510	0	510	0	510	510	0	0	0
26252	0	510	0	510	0	510	0	510	0	510	0	510	0	510	0	510	0	510	510	0	0	0		26252	0	510	0	510	0	510	0	510	0	510	0	510	0	510	0	510	0	510	0	510	510	0	0	0
26362	0	510	0	510	0	510	0	510	0	510	0	510	0	510	0	510	0	510	510	0	0	0		26362	0	510	0	510	0	510	0	510	0	510	0	510	0	510	0	510	0	510	0	510	510	0	0	0
26473	0	510	0	510	0	510	0	510	0	510	0	510	0	510	0	510	0	510	510	0	0	0		26473	0	510	0	510	0	510	0	510	0	510	0	510	0	510	0	510	0	510	0	510	510	0	0	0
26584	0	510	0	510	0	510	0	510	0	510	0	510	0	510	0	510	0	510	510	0	0	0		26584	0	510	0	510	0	510	0	510	0	510	0	510	0	510	0	510	0	510	0	510	510	0	0	0
26695	0	510	0	510	0	510	0	510	0	510	0	510	0	510	0	510	0	510	510	0	0	0		26695	0	510	0	510	0	510	0	510	0	510	0	510	0	510	0	510	0	510	0	510	510	0	0	0
26805	0	510	0	510	0	510	0	510	0	510	0	510	0	510	0	510	0	510	510	0	0	0		26805	0	510	0	510	0	510	0	510	0	510	0	510	0	510	0	510	0	510	0	510	510	0	0	0
26916	0	510	0	510	0	510	0	510	0	510	0	510	0	510	0	510	0	510	510	0	0	0		26916	0	510	0	510	0	510	0	510	0	510	0	510	0	510	0	510	0	510	0	510	510	0	0	0
27027	0	510	0	510	0	510	0	510	0	510	0	510	0	510	0	510	0	510	510	0	0	0		27027	0	510	0	510	0	510	0	510	0	510	0	510	0	510	0	510	0	510	0	510	510	0	0	0
27138	0	510	0	510	0	510	0	510	0	510	0	510	0	510	0	510	0	510	510	0	0	0		27138	0	510	0	510	0	510	0	510	0	510	0	510	0	510	0	510	0	510	0	510	510	0	0	0
27249	0	510	0	510	0	510	0	510	0	510	0	510	0	510	0	510	0	510	510	0	0	0		27249	0	510	0	510	0	510	0	510	0	510	0	510	0	510	0	510	0	510	0	510	510	0	0	0
27359	0	510	0	510	0	510	0	510	0	510	0	510	0	510	0	510	0	510	510	0	0	0		27359	0	510	0	510	0	510	0	510	0	510	0	510	0	510	0	510	0	510	0	510	510	0	0	0
27470	0	510	0	510	0	510	0	510	0	510	0	510	0	510	0	510	0	510	510	0	0	0		27470	0	510	0	510	0	510	0	510	0	510	0	510	0	510	0	510	0	510	0	510	510	0	0	0
27581	0	510	0	510	0	510	0	510	0	510	0	510	0	510	0	510	0	510	510	0	0	0		27581	0	510	0	510	0	510	0	510	0	510	0	510	0	510	0	510	0	510	0	510	510	0	0	0
27692	0	510	0	510	0	510	0	510	0	510	0	510	0	510	0	510	0	510	510	0	0	0		27692	0	510	0	510	0	510	0	510	0	510	0	510	0	510	0	510	0	510	0	510	510	0	0	0
27802	0	510	0	510	0	510	0	510	0	510	0	510	0	510	0	510	0	510	510	0	0	0		27802	0	510	0	510	0	510	0	510	0	510	0	510	0	510	0	510	0	510	0	510	510	0	0	0
27913	0	510	0	510	0	510	0	510	0	510	0	510	0	510	0	510	0	510	510	0	0	0		27913	0	510	0	510	0	510	0	510	0	510	0	510	0	510	0	510	0	510	0	510	510	0	0	0
28024	0	510	0	510	0	510	0	510	0	510	0	510	0	510	0	510	0	510	510	0	0	0		28024	0	510	0	510	0	510	0	510	0	510	0	510	0	510	0	510	0	510	0	510	510	0	0	0
28135	0	510	0	510	0	510	0	510	0	510	0	510	0	510	0	510	0	510	510	0	0	0		28135	0	510	0	510	0	510	0	510	0	510	0	510	0	510	0	510	0	510	0	510	510	0	0	0
28245	0	510	0	510	0	510	0	510	0	510	0	510	0	510	0	510	0	510	510	0	0	0		28245	0	510	0	510	0	510	0	510	0	510	0	510	0	510	0	510	0	510	0	510	510	0	0	0
28356	0	510	0	510	0	510	0	510	0	510	0	510	0	510	0	510	0	510	510	0	0	0		28356	0	510	0	510	0	510	0	510	0	510	0	510	0	510	0	510	0	510	0	510	510	0	0	0
28467	0	510	0	510	0	510	0	510	0	510	0	510	0	510	0	510	0	510	510	0	0	0		28467	0	510	0	510	0	510	0	510	0	510	0	510	0	510	0	510	0	510	0	510	510	0	0	0
28578	0	510	0	510	0	510	0	510	0	510	0	510	0	510	0	510	0	510	510	0	0	0		28578	0	510	0	510	0	510	0	510	0	510	0	510	0	510	0	510	0	510	0	510	510	0	0	0
28688	0	510	0	510	0	510	0	510	0	510	0	510	0	510	0	510	0	510	510	0	0	0		28688	0	510	0	510	0	510	0	510	0	510	0	510	0	510	0	510	0	510	0	510	510	0	0	0
28799	0	510	0	510	0	510	0	510	0	510	0	510	0	510	0	510	0	510	510	0	0	0		28799	0	510	0	510	0	510	0	510	0	510	0	510	0	510	0	510	0	510	0	510	510	0	0	0
28910	0	510	0	510	0	510	0	510	0	510	0	510	0	510	0	510	0	510	510	0	0	0		28910	0	510	0	510	0	510	0	510	0	510	0	510	0	510	0	510	0	510	0	510	510	0	0	0
29021	0	510	0	510	0	510	0	510	0	510	0	510	0	510	0	510	0	510	510	0	0	0		29021	0	510	0	510	0	510	0	510	0	510	0	510	0	510	0	510	0	510	0	510	510	0	0	0
29132	0	510	0	510	0	510	0	510	0	510	0	510	0	510	0	510	0	510	510	0	0	0		29132	0	510	0	510	0	510	0	510	0	510	0	510	0	510	0	510	0	510	0	510	510	0	0	0
29242	0	510	0	510	0	510	0	510	0	510	0	510	0	510	0	510	0	510	510	0	0	0		29242	0	510	0	510	0	510	0	510	0	510	0	510	0	510	0	510	0	510	0	510	510	0	0	0
29353	0	510	0	510	0	510	0	510	0	510	0	510	0	510	0	510	0	510	510	0	0	0		29353	0	510	0	510	0	510	0	510	0	510	0	510	0	510	0	510	0	510	0	510	510	0	0	0
29464	0	510	0	510	0	510	0	510	0	510	0	510	0	510	0	510	0	510	510	0	0	0		29464	0	510	0	510	0	510	0	510	0	510	0	510	0	510	0	510	0	510	0	510	510	0	0	0
29575	0	510	0	510	0	510	0	510	0	510	0	510	0	510	0	510	0	510	510	0	0	0		29575	0	510	0	510	0	510	0	510	0	510	0	510	0	510	0	510	0	510	0	510	510	0	0	0
29685	0	510	0	510	0	510	0	510	0	510	0	510	0	510	0	510	0	510	510	0	0	0		29685	0	510	0	510	0	510	0	510	0	510	0	510	0	510	0	510	0	510	0	510	510	0	0	0
29796	0	510	0	510	0	510	0	510	0	510	0	510	0	510	0	510	0	510	510	0	0	0		29796	0	510	0	510	0	510	0	510	0	510	0	510	0	510	0	510	0	510	0	510	510	0	0	0
29907	0	510	0	510	0	510	0	510	0	510	0	510	0	510	0	510	0	510	510	0	0	0		29907	0	510	0	510	0	510	0	510	0	510	0	510	0	510	0	510	0	510	0	510	510	0	0	0
30018	0	510	0	510	0	510	0	510	0	510	0	510	0	510	0	510	0	510	510	0	0	0		30018	0	510	0	510	0	510	0	510	0	510	0	510	0	510	0	510	0	510	0	510	510	0	0	0
30128	0	510	0	510	0	510	0	510	0	510	0	510	0	510	0	510	0	510	510	0	0	0		30128	0	510	0	510	0	510	0	510	0	510	0	510	0	510	0	510	0	510	0	510	510	0	0	0
30239	0	510	0	510	0	510	0	510	0	510	0	510	0	510	0	510	0	510	510	0	0	0		30239	0	510	0	510	0	510	0	510	0	510	0	510	0	510	0	510	0	510	0	510	510	0	0	0
30350	0	510	0	510	0	510	0	510	0	510	0	510	0	510	0	510	0	510	510	0	0	0		30350	0	510	0	510	0	510	0	510	0	510	0	510	0	510	0	510	0	510	0	510	510	0	0	0
30461	0	510	0	510	0	510	0	510	0	510	0	510	0	510	0	510	0	510	510	0	0	0		30461	0	510	0	510	0	510	0	510	0	510	0	510	0	510	0	510	0	510	0	510	510	0	0	0
30572	0	510	0	510	0	510	0	510	0	510	0	510	0	510	0	510	0	510	510	0	0	0		30572	0	510	0	510	0	510	0	510	0	510	0	510	0	510	0	510	0	510	0	510	510	0	0	0
30682	0	510	0	510	0	510	0	510	0	510	0	510	0	510	0	510	0	510	510	0	0	0		30682	0	510	0	510	0	510	0	510	0	510	0	510	0	510	0	510	0	510	0	510	510	0	0	0
30793	0	510	0	510	0	510	0	510	0	510	0	510	0	510	0	510	0	510	510	0	0	0		30793	0	510	0	510	0	510	0	510	0	510	0	510	0	510	0	510	0	510	0	510	510	0	0	0
30904	0	510	0	510	0	510	0	510	0	510	0	510	0	510	0	510	0	510	510	0	0	0		30904	0	510	0	510	0	510	0	510	0	510	0	510	0	510	0	510	0	510	0	510	510	0	0	0
31015	0	510	0	510	0	510	0	510	0	510	0	510	0	510	0	510	0	510	510	0	0	0		31015	0	510	0	510	0	510	0	510	0	510	0	510	0	510	0	510	0	510	0	510	510	0	0	0
31125	0	510	0	510	0	510	0	510	0	510	0	510	0	510	0	510	0	510	510	0	0	0		31125	0	510	0	510	0	510	0	510	0	510	0	510	0	510	0	510	0	510	0	510	510	0	0	0
31236	0	510	0	510	0	510	0	510	0	510	0	510	0	510	0	510	0	510	510	0	0	0		31236	0	510	0	510	0	510	0	510	0	510	0	510	0	510	0	510	0	510	0	510	510	0	0	0
31347	0	510	0	510	0	510	0	510	0	510	0	510	0	510	0	510	0	510	510	0	0	0		31347	0	510	0	510	0	510	0	510	0	510	0	510	0	510	0	510	0	510	0	510	510	0	0	0
31458	0	510	0	510	0	510	0	510	0	510	0	510	0	510	0	510	0	510	510	0	0	0		31458	0	510	0	510	0	510	0	510	0	510	0	510	0	510	0	510	0	510	0	510	510	0	0	0
31568	0	510	0	510	0	510	0	510	0	510	0	510	0	510	0	510	0	510	510	0	0	0		31568	0	510	0	510	0	510	0	510	0	510	0	510	0	510	0	510	0	510	0	510	510	0	0	0
31679	0	510	0	510	0	510	0	510	0	510	0	510	0	510	0	510	0	510	510	0	0	0		31679	0	510	0	510	0	510	0	510	0	510	0	510	0	510	0	510	0	510	0	510	510	0	0	0
31790	0	510	0	510	0	510	0	510	0	510	0	510	0	510	0	510	0	510	510	0	0	0		31790	0	510	0	510	0	510	0	510	0	510	0	510	0	510	0	510	0	510	0	510	510	0	0	0
31901	0	510	0	510	0	510	0	510	0	510	0	510	0	510	0	510	0	510	510	0	0	0		31901	0	510	0	510	0	510	0	510	0	510	0	510	0	510	0	510	0	510	0	510	510	0	0	0
32011	0	510	0	510	0	510	0	510	0	510	0	510	0	510	0	510	0	510	510	0	0	0		32011	0	510	0	510	0	510	0	510	0	510	0	510	0	510	0	510	0	510	0	510	510	0	0	0
32122	0	510	0	510	0	510	0	510	0	510	0	510	0	510	0	510	0	510	510	0	0	0		32122	0	510	0	510	0	510	0	510	0	510	0	510	0	510	0	510	0	510	0	510	510	0	0	0
32233	0	510	0	510	0	510	0	510	0	510	0	510	0	510	0	510	0	510	510	0	0	0		32233	0	510	0	510	0	510	0	510	0	510	0	510	0	510	0	510	0	510	0	510	510	0	0	0
32344	0	510	0	510	0	510	0	510	0	510	0	510	0	510	0	510	0	510	510	0	0	0		32344	0	510	0	510	0	510	0	510	0	510	0	510	0	510	0	510	0	510	0	510	510	0	0	0
32455	0	510	0	510	0	510	0	510	0	510	0	510	0	510	0	510	0	510	510	0	0	0		32455	0	510	0	510	0	510	0	510	0	510	0	510	0	510	0	510	0	510	0	510	510	0	0	0
32565	0	510	0	510	0	510	0	510	0	510	0	510	0	510	0	510	0	510	510	0	0	0		32565	0	510	0	510	0	510	0	510	0	510	0	510	0	510	0	510	0	510	0	510	510	0	0	0
32676	0	510	0	510	0	510	0	510	0	510	0	510	0	510	0	510	0	510	510	0	0	0		32676	0	510	0	510	0	510	0	510	0	510	0	510	0	510	0	510	0	510	0	510	510	0	0	0
32787	0	510	0	510	0	510	0	510	0	510	0	510	0	510	0	510	0	510	510	0	0	0		32787	0	510	0	510	0	510	0	510	0	510	0	510	0	510	0	510	0	510	0	510	510	0	0	0
32898	0	510	0	510	0	510	0	510	0	510	0	510	0	510	0	510	0	510	510	0	0	0		32898	0	510	0	510	0	510	0	510	0	510	0	510	0	510	0	510	0	510	0	510	510	0	0	0
33008	0	510	0	510	0	510	0	510	0	510	0	510	0	510	0	510	0	510	510	0	0	0		33008	0	510	0	510	0	510	0	510	0	510	0	510	0	510	0	510	0	510	0	510	510	0	0	0
33119	0	510	0	510	0	510	0	510	0	510	0	510	0	510	0	510	0	510	510	0	0	0		33119	0	510	0	510	0	510	0	510	0	510	0	510	0	510	0	510	0	510	0	510	510	0	0	0
33230	0	510	0	510	0	510	0	510	0	510	0	510	0	510	0	510	0	510	510	0	0	0		33230	0	510	0	510	0	510	0	510	0	510	0	510	0	510	0	510	0	510	0	510	510	0	0	0
33341	0	510	0	510	0	510	0	510	0	510	0	510	0	510	0	510	0	510	510	0	0	0		33341	0	510	0	510	0	510	0	510	0	510	0	510	0	510	0	510	0	510	0	510	510	0	0	0
33451	0	510	0	510	0	510	0	510	0	510	0	510	0	510	0	510	0	510	510	0	0	0		33451	0	510	0	510	0	510	0	510	0	510	0	510	0	510	0	510	0	510	0	510	510	0	0	0
33562	0	510	0	510	0	510	0	510	0	510	0	510	0	510	0	510	0	510	510	0	0	0		33562	0	510	0	510	0	510	0	510	0	510	0	510	0	510	0	510	0	510	0	510	510	0	0	0
33673	0	510	0	510	0	510	0	510	0	510	0	510	0	510	0	510	0	510	510	0	0	0		33673	0	510	0	510	0	510	0	510	0	510	0	510	0	510	0	510	0	510	0	510	510	0	0	0
33784	0	510	0	510	0	510	0	510	0	510	0	510	0	510	0	510	0	510	510	0	0	0		33784	0	510	0	510	0	510	0	510	0	510	0	510	0	510	0	510	0	510	0	510	510	0	0	0
33895	0	510	0	510	0	510	0	510	0	510	0	510	0	510	0	510	0	510	510	0	0	0		33895	0	510	0	510	0	510	0	510	0	510	0	510	0	510	0	510	0	510	0	510	510	0	0	0
34005	0	510	0	510	0	510	0	510	0	510	0	510	0	510	0	510	0	510	510	0	0	0		34005	0	510	0	510	0	510	0	510	0	510	0	510	0	510	0	510	0	510	0	510	510	0	0	0
34116	0	510	0	510	0	510	0	510	0	510	0	510	0	510	0	510	0	510	510	0	0	0		34116	0	510	0	510	0	510	0	510	0	510	0	510	0	510	0	510	0	510	0	510	510	0	0	0
34227	0	510	0	510	0	510	0	510	0	510	0	510	0	510	0	510	0	510	510	0	0	0		34227	0	510	0	510	0	510	0	510	0	510	0	510	0	510	0	510	0	510	0	510	510	0	0	0
34338	0	510	0	510	0	510	0	510	0	510	0	510	0	510	0	510	0	510	510	0	0	0		34338	0	510	0	510	0	510	0	510	0	510	0	510	0	510	0	510	0	510	0	510	510	0	0	0
34448	0	510	0	510	0	510	0	510	0	510	0	510	0	510	0	510	0	510	510	0	0	0		34448	0	510	0	510	0	510	0	510	0	510	0	510	0	510	0	510	0	510	0	510	510	0	0	0
34559	0	510	0	510	0	510	0	510	0	510	0	510	0	510	0	510	0	510	510	0	0	0		34559	0	510	0	510	0	510	0	510	0	510	0	510	0	510	0	510	0	510	0	510	510	0	0	0
34670	0	510	0	510	0	510	0	510	0	510	0	510	0	510	0	510	0	510	510	0	0	0		34670	0	510	0	510	0	510	0	510	0	510	0	510	0	510	0	510	0	510	0	510	510	0	0	0
34781	0	510	0	510	0	510	0	510	0	510	0	510	0	510	0	510	0	510	510	0	0	0		34781	0	510	0	510	0	510	0	510	0	510	0	510	0	510	0	510	0	510	0	510	510	0	0	0
34891	0	510	0	510	0	510	0	510	0	510	0	510	0	510	0	510	0	510	510	0	0	0		34891	0	510	0	510	0	510	0	510	0	510	0	510	0	510	0	510	0	510	0	510	510	0	0	0
35002	0	510	0	510	0	510	0	510	0	510	0	510	0	510	0	510	0	510	510	0	0	0		35002	0	510	0	510	0	510	0	510	0	510	0	510	0	510	0	510	0	510	0	510	510	0	0	0
35113	0	510	0	510	0	510	0	510	0	510	0	510	0	510	0	510	0	510	510	0	0	0		35113	0	510	0	510	0	510	0	510	0	510	0	510	0	510	0	510	0	510	0	510	510	0	0	0
35224	0	510	0	510	0	510	0	510	0	510	0	510	0	510	0	510	0	510	510	0	0	0		35224	0	510	0	510	0	510	0	510	0	510	0	510	0	510	0	510	0	510	0	510	510	0	0	0
35334	0	510	0	510	0	510	0	510	0	510	0	510	0	510	0	510	0	510	510	0	0	0		35334	0	510	0	510	0	510	0	510	0	510	0	510	0	510	0	510	0	510	0	510	510	0	0	0
35445	0	510	0	510	0	510	0	510	0	510	0	510	0	510	0	510	0	510	510	0	0	0		35445	0	510	0	510	0	510	0	510	0	510	0	510	0	510	0	510	0	510	0	510	510	0	0	0
35556	0	510	0	510	0	510	0	510	0	510	0	510	0	510	0	510	0	510	510	0	0	0		35556	0	510	0	510	0	510	0	510	0	510	0	510	0	510	0	510	0	510	0	510	510	0	0	0
35667	0	510	0	510	0	510	0	510	0	510	0	510	0	510	0	510	0	510	510	0	0	0		35667	0	510	0	510	0	510	0	510	0	510	0	510	0	510	0	510	0	510	0	510	510	0	0	0
35778	0	510	0	510	0	510	0	510	0	510	0	510	0	510	0	510	0	510	510	0	0	0		35778	0	510	0	510	0	510	0	510	0	510	0	510	0	510	0	510	0	510	0	510	510	0	0	0
35888	0	510	0	510	0	510	0	510	0	510	0	510	0	510	0	510	0	510	510	0	0	0		35888	0	510	0	510	0	510	0	510	0	510	0	510	0	510	0	510	0	510	0	510	510	0	0	0
35999	0	510	0	510	0	510	0	510	0	510	0	510	0	510	0	510	0	510	510	0	0	0		35999	0	510	0	510	0	510	0	510	0	510	0	510	0	510	0	510	0	510	0	510	510	0	0	0
36110	0	510	0	510	0	510	0	510	0	510	0	510	0	510	0	510	0	510	510	0	0	0		36110	0	510	0	510	0	510	0	510	0	510	0	510	0	510	0	510	0	510	0	510	510	0	0	0
36221	0	510	0	510	0	510	0	510	0	510	0	510	0	510	0	510	0	510	510	0	0	0		36221	0	510	0	510	0	510	0	510	0	510	0	510	0	510	0	510	0	510	0	510	510	0	0	0
36331	0	510	0	510	0	510	0	510	0	510	0	510	0	510	0	510	0	510	510	0	0	0		36331	0	510	0	510	0	510	0	510	0	510	0	510	0	510	0	510	0	510	0	510	510	0	0	0
36442	0	510	0	510	0	510	0	510	0	510	0	510	0	510	0	510	0	510	510	0	0	0		36442	0	510	0	510	0	510	0	510	0	510	0	510	0	510	0	510	0	510	0	510	510	0	0	0
36553	0	510	0	510	0	510	0	510	0	510	0	510	0	510	0	510	0	510	510	0	0	0		36553	0	510	0	510	0	510	0	510	0	510	0	510	0	510	0	510	0	510	0	510	510	0	0	0
36664	0	510	0	510	0	510	0	510	0	510	0	510	0	510	0	510	0	510	510	0	0	0		36664	0	510	0	510	0	510	0	510	0	510	0	510	0	510	0	510	0	510	0	510	510	0	0	0
36774	0	510	0	510	0	510	0	510	0	510	0	510	0	510	0	510	0	510	510	0	0	0		36774	0	510	0	510	0	510	0	510	0	510	0	510	0	510	0	510	0	510	0	510	510	0	0	0
36885	0	510	0	510	0	510	0	510	0	510	0	510	0	510	0	510	0	510	510	0	0	0		36885	0	510	0	510	0	510	0	510	0	510	0	510	0	510	0	510	0	510	0	510	510	0	0	0
36996	0	510	0	510	0	510	0	510	0	510	0	510	0	510	0	510	0	510	510	0	0	0		36996	0	510	0	510	0	510	0	510	0	510	0	510	0	510	0	510	0	510	0	510	510	0	0	0
37107	0	510	0	510	0	510	0	510	0	510	0	510	0	510	0	510	0	510	510	0	0	0		37107	0	510	0	510	0	510	0	510	0	510	0	510	0	510	0	510	0	510	0	510	510	0	0	0
37217	0	510	0	510	0	510	0	510	0	510	0	510	0	510	0	510	0	510	510	0	0	0		37217	0	510	0	510	0	510	0	510	0	510	0	510	0	510	0	510	0	510	0	510	510	0	0	0
37328	0	510	0	510	0	510	0	510	0	510	0	510	0	510	0	510	0	510	510	0	0	0		37328	0	510	0	510	0	510	0	510	0	510	0	510	0	510	0	510	0	510	0	510	510	0	0	0
37439	0	510	0	510	0	510	0	510	0	510	0	510	0	510	0	510	0	510	510	0	0	0		37439	0	510	0	510	0	510	0	510	0	510	0	510	0	510	0	510	0	510	0	510	510	0	0	0
37550	0	510	0	510	0	510	0	510	0	510	0	510	0	510	0	510	0	510	510	0	0	0		37550	0	510	0	510	0	510	0	510	0	510	0	510	0	510	0	510	0	510	0	510	510	0	0	0
37661	0	510	0	510	0	510	0	510	0	510	0	510	0	510	0	510	0	510	510	0	0	0		37661	0	510	0	510	0	510	0	510	0	510	0	510	0	510	0	510	0	510	0	510	510	0	0	0
37771	0	510	0	510	0	510	0	510	0	510	0	510	0	510	0	510	0	510	510	0	0	0		37771	0	510	0	510	0	510	0	510	0	510	0	510	0	510	0	510	0	510	0	510	510	0	0	0
37882	0	510	0	510	0	510	0	510	0	510	0	510	0	510	0	510	0	510	510	0	0	0		37882	0	510	0	510	0	510	0	510	0	510	0	510	0	510	0	510	0	510	0	510	510	0	0	0
37993	0	510	0	510	0	510	0	510	0	510	0	510	0	510	0	510	0	510	510	0	0	0		37993	0	510	0	510	0	510	0	510	0	510	0	510	0	510	0	510	0	510	0	510	510	0	0	0
38104	0	510	0	510	0	510	0	510	0	510	0	510	0	510	0	510	0	510	510	0	0	0		38104	0	510	0	510	0	510	0	510	0	510	0	510	0	510	0	510	0	510	0	510	510	0	0	0
38214	0	510	0	510	0	510	0	510	0	510	0	510	0	510	0	510	0	510	510	0	0	0		38214	0	510	0	510	0	510	0	510	0	510	0	510	0	510	0	510	0	510	0	510	510	0	0	0
38325	0	510	0	510	0	510	0	510	0	510	0	510	0	510	0	510	0	510	510	0	0	0		38325	0	510	0	510	0	510	0	510	0	510	0	510	0	510	0	510	0	510	0	510	510	0	0	0
38436	0	510	0	510	0	510	0	510	0	510	0	510	0	510	0	510	0	510	510	0	0	0		38436	0	510	0	510	0	510	0	510	0	510	0	510	0	510	0	510	0	510	0	510	510	0	0	0
38547	0	510	0	510	0	510	0	510	0	510	0	510	0	510	0	510	0	510	510	0	0	0		38547	0	510	0	510	0	510	0	510	0	510	0	510	0	510	0	510	0	510	0	510	510	0	0	0
38657	0	510	0	510	0	510	0	510	0	510	0	510	0	510	0	510	0	510	510	0	0	0		38657	0	510	0	510	0	510	0	510	0	510	0	510	0	510	0	510	0	510	0	510	510	0	0	0
38768	0	510	0	510	0	510	0	510	0	510	0	510	0	510	0	510	0	510	510	0	0	0		38768	0	510	0	510	0	510	0	510	0	510	0	510	0	510	0	510	0	510	0	510	510	0	0	0
38879	0	510	0	510	0	510	0	510	0	510	0	510	0	510	0	510	0	510	510	0	0	0		38879	0	510	0	510	0	510	0	510	0	510	0	510	0	510	0	510	0	510	0	510	510	0	0	0
38990	0	510	0	510	0	510	0	510	0	510	0	510	0	510	0	510	0	510	510	0	0	0		38990	0	510	0	510	0	510	0	510	0	510	0	510	0	510	0	510	0	510	0	510	510	0	0	0
39101	0	510	0	510	0	510	0	510	0	510	0	510	0	510	0	510	0	510	510	0	0	0		39101	0	510	0	510	0	510	0	510	0	510	0	510	0	510	0	510	0	510	0	510	510	0	0	0
39211	0	510	0	510	0	510	0	510	0	510	0	510	0	510	0	510	0	510	510	0	0	0		39211	0	510	0	510	0	510	0	510	0	510	0	510	0	510	0	510	0	510	0	510	510	0	0	0
39322	0	510	0	510	0	510	0	510	0	510	0	510	0	510	0	510	0	510	510	0	0	0		39322	0	510	0	510	0	510	0	510	0	510	0	510	0	510	0	510	0	510	0	510	510	0	0	0
39433	0	510	0	510	0	510	0	510	0	510	0	510	0	510	0	510	0	510	510	0	0	0		39433	0	510	0	510	0	510	0	510	0	510	0	510	0	510	0	510	0	510	0	510	510	0	0	0
39544	0	510	0	510	0	510	0	510	0	510	0	510	0	510	0	510	0	510	510	0	0	0		39544	0	510	0	510	0	510	0	510	0	510	0	510	0	510	0	510	0	510	0	510	510	0	0	0
39654	0	510	0	510	0	510	0	510	0	510	0	510	0	510	0	510	0	510	510	0	0	0		39654	0	510	0	510	0	510	0	510	0	510	0	510	0	510	0	510	0	510	0	510	510	0	0	0
39765	0	510	0	510	0	510	0	510	0	510	0	510	0	510	0	510	0	510	510	0	0	0		39765	0	510	0	510	0	510	0	510	0	510	0	510	0	510	0	510	0	510	0	510	510	0	0	0
39876	0	510	0	510	0	510	0	510	0	510	0	510	0	510	0	510	0	510	510	0	0	0		39876	0	510	0	510	0	510	0	510	0	510	0	510	0	510	0	510	0	510	0	510	510	0	0	0
39987	0	510	0	510	0	510	0	510	0	510	0	510	0	510	0	510	0	510	510	0	0	0		39987	0	510	0	510	0	510	0	510	0	510	0	510	0	510	0	510	0	510	0	510	510	0	0	0
40097	0	510	0	510	0	510	0	510	0	510	0	510	0	510	0	510	0	510	510	0	0	0		40097	0	510	0	510	0	510	0	510	0	510	0	510	0	510	0	510	0	510	0	510	510	0	0	0
40208	0	510	0	510	0	510	0	510	0	510	0	510	0	510	0	510	0	510	510	0	0	0		40208	0	510	0	510	0	510	0	510	0	510	0	510	0	510	0	510	0	510	0	510	510	0	0	0
40319	0	510	0	510	0	510	0	510	0	510	0	510	0	510	0	510	0	510	510	0	0	0		40319	0	510	0	510	0	510	0	510	0	510	0	510	0	510	0	510	0	510	0	510	510	0	0	0
40430	0	510	0	510	0	510	0	510	0	510	0	510	0	510	0	510	0	510	510	0	0	0		40430	0	510	0	510	0	510	0	510	0	510	0	510	0	510	0	510	0	510	0	510	510	0	0	0
40540	0	510	0	510	0	510	0	510	0	510	0	510	0	510	0	510	0	510	510	0	0	0		40540	0	510	0	510	0	510	0	510	0	510	0	510	0	510	0	510	0	510	0	510	510	0	0	0
40651	0	510	0	510	0	510	0	510	0	510	0	510	0	510	0	510	0	510	510	0	0	0		40651	0	510	0	510	0	510	0	510	0	510	0	510	0	510	0	510	0	510	0	510	510	0	0	0
40762	0	510	0	510	0	510	0	510	0	510	0	510	0	510	0	510	0	510	510	0	0	0		40762	0	510	0	510	0	510	0	510	0	510	0	510	0	510	0	510	0	510	0	510	510	0	0	0
40873	0	510	0	510	0	510	0	510	0	510	0	510	0	510	0	510	0	510	510	0	0	0		40873	0	510	0	510	0	510	0	510	0	510	0	510	0	510	0	510	0	510	0	510	510	0	0	0
40984	0	510	0	510	0	510	0	510	0	510	0	510	0	510	0	510	0	510	510	0	0	0		40984	0	510	0	510	0	510	0	510	0	510	0	510	0	510	0	510	0	510	0	510	510	0	0	0
41094	0	510	0	510	0	510	0	510	0	510	0	510	0	510	0	510	0	510	510	0	0	0		41094	0	510	0	510	0	510	0	510	0	510	0	510	0	510	0	510	0	510	0	510	510	0	0	0
41205	0	510	0	510	0	510	0	510	0	510	0	510	0	510	0	510	0	510	510	0	0	0		41205	0	510	0	510	0	510	0	510	0	510	0	510	0	510	0	510	0	510	0	510	510	0	0	0
41316	0	510	0	510	0	510	0	510	0	510	0	510	0	510	0	510	0	510	510	0	0	0		41316	0	510	0	510	0	510	0	510	0	510	0	510	0	510	0	510	0	510	0	510	510	0	0	0
41427	0	510	0	510	0	510	0	510	0	510	0	510	0	510	0	510	0	510	510	0	0	0		41427	0	510	0	510	0	510	0	510	0	510	0	510	0	510	0	510	0	510	0	510	510	0	0	0
41537	0	510	0	510	0	510	0	510	0	510	0	510	0	510	0	510	0	510	510	0	0	0		41537	0	510	0	510	0	510	0	510	0	510	0	510	0	510	0	510	0	510	0	510	510	0	0	0
41648	0	510	0	510	0	510	0	510	0	510	0	510	0	510	0	510	0	510	510	0	0	0		41648	0	510	0	510	0	510	0	510	0	510	0	510	0	510	0	510	0	510	0	510	510	0	0	0
41759	0	510	0	510	0	510	0	510	0	510	0	510	0	510	0	510	0	510	510	0	0	0		41759	0	510	0	510	0	510	0	510	0	510	0	510	0	510	0	510	0	510	0	510	510	0	0	0
41870	0	510	0	510	0	510	0	510	0	510	0	510	0	510	0	510	0	510	510	0	0	0		41870	0	510	0	510	0	510	0	510	0	510	0	510	0	510	0	510	0	510	0	510	510	0	0	0
41980	0	510	0	510	0	510	0	510	0	510	0	510	0	510	0	510	0	510	510	0	0	0		41980	0	510	0	510	0	510	0	510	0	510	0	510	0	510	0	510	0	510	0	510	510	0	0	0
42091	0	510	0	510	0	510	0	510	0	510	0	510	0	510	0	510	0	510	510	0	0	0		42091	0	510	0	510	0	510	0	510	0	510	0	510	0	510	0	510	0	510	0	510	510	0	0	0
42202	0	510	0	510	0	510	0	510	0	510	0	510	0	510	0	510	0	510	510	0	0	0		42202	0	510	0	510	0	510	0	510	0	510	0	510	0	510	0	510	0	510	0	510	510	0	0	0
42313	0	510	0	510	0	510	0	510	0	510	0	510	0	510	0	510	0	510	510	0	0	0		42313	0	510	0	510	0	510	0	510	0	510	0	510	0	510	0	510	0	510	0	510	510	0	0	0
42424	0	510	0	510	0	510	0	510	0	510	0	510	0	510	0	510	0	510	510	0	0	0		42424	0	510	0	510	0	510	0	510	0	510	0	510	0	510	0	510	0	510	0	510	510	0	0	0
42534	0	510	0	510	0	510	0	510	0	510	0	510	0	510	0	510	0	510	510	0	0	0		42534	0	510	0	510	0	510	0	510	0	510	0	510	0	510	0	510	0	510	0	510	510	0	0	0
42645	0	510	0	510	0	510	0	510	0	510	0	510	0	510	0	510	0	510	510	0	0	0		42645	0	510	0	510	0	510	0	510	0	510	0	510	0	510	0	510	0	510	0	510	510	0	0	0
42756	0	510	0	510	0	510	0	510	0	510	0	510	0	510	0	510	0	510	510	0	0	0		42756	0	510	0	510	0	510	0	510	0	510	0	510	0	510	0	510	0	510	0	510	510	0	0	0
42867	0	510	0	510	0	510	0	510	0	510	0	510	0	510	0	510	0	510	510	0	0	0		42867	0	510	0	510	0	510	0	510	0	510	0	510	0	510	0	510	0	510	0	510	510	0	0	0
42977	0	510	0	510	0	510	0	510	0	510	0	510	0	510	0	510	0	510	510	0	0	0		42977	0	510	0	510	0	510	0	510	0	510	0	510	0	510	0	510	0	510	0	510	510	0	0	0
43088	0	510	0	510	0	510	0	510	0	510	0	510	0	510	0	510	0	510	510	0	0	0		43088	0	510	0	510	0	510	0	510	0	510	0	510	0	510	0	510	0	510	0	510	510	0	0	0
43199	0	510	0	510	0	510	0	510	0	510	0	510	0	510	0	510	0	510	510	0	0	0		43199	0	510	0	510	0	510	0	510	0	510	0	510	0	510	0	510	0	510	0	510	510	0	0	0
43310	0	510	0	510	0	510	0	510	0	510	0	510	0	510	0	510	0	510	510	0	0	0		43310	0	510	0	510	0	510	0	510	0	510	0	510	0	510	0	510	0	510	0	510	510	0	0	0
43420	0	510	0	510	0	510	0	510	0	510	0	510	0	510	0	510	0	510	510	0	0	0		43420	0	510	0	510	0	510	0	510	0	510	0	510	0	510	0	510	0	510	0	510	510	0	0	0
43531	0	510	0	510	0	510	0	510	0	510	0	510	0	510	0	510	0	510	510	0	0	0		43531	0	510	0	510	0	510	0	510	0	510	0	510	0	510	0	510	0	510	0	510	510	0	0	0
43642	0	510	0	510	0	510	0	510	0	510	0	510	0	510	0	510	0	510	510	0	0	0		43642	0	510	0	510	0	510	0	510	0	510	0	510	0	510	0	510	0	510	0	510	510	0	0	0
43753	0	510	0	510	0	510	0	510	0	510	0	510	0	510	0	510	0	510	510	0	0	0		43753	0	510	0	510	0	510	0	510	0	510	0	510	0	510	0	510	0	510	0	510	510	0	0	0
43863	0	510	0	510	0	510	0	510	0	510	0	510	0	510	0	510	0	510	510	0	0	0		43863	0	510	0	510	0	510	0	510	0	510	0	510	0	510	0	510	0	510	0	510	510	0	0	0
43974	0	510	0	510	0	510	0	510	0	510	0	510	0	510	0	510	0	510	510	0	0	0		43974	0	510	0	510	0	510	0	510	0	510	0	510	0	510	0	510	0	510	0	510	510	0	0	0
44085	0	510	0	510	0	510	0	510	0	510	0	510	0	510	0	510	0	510	510	0	0	0		44085	0	510	0	510	0	510	0	510	0	510	0	510	0	510	0	510	0	510	0	510	510	0	0	0
44196	0	510	0	510	0	510	0	510	0	510	0	510	0	510	0	510	0	510	510	0	0	0		44196	0	510	0	510	0	510	0	510	0	510	0	510	0	510	0	510	0	510	0	510	510	0	0	0
44307	0	510	0	510	0	510	0	510	0	510	0	510	0	510	0	510	0	510	510	0	0	0		44307	0	510	0	510	0	510	0	510	0	510	0	510	0	510	0	510	0	510	0	510	510	0	0	0
44417	0	510	0	510	0	510	0	510	0	510	0	510	0	510	0	510	0	510	510	0	0	0		44417	0	510	0	510	0	510	0	510	0	510	0	510	0	510	0	510	0	510	0	510	510	0	0	0
44528	0	510	0	510	0	510	0	510	0	510	0	510	0	510	0	510	0	510	510	0	0	0		44528	0	510	0	510	0	510	0	510	0	510	0	510	0	510	0	510	0	510	0	510	510	0	0	0
44639	0	510	0	510	0	510	0	510	0	510	0	510	0	510	0	510	0	510	510	0	0	0		44639	0	510	0	510	0	510	0	510	0	510	0	510	0	510	0	510	0	510	0	510	510	0	0	0
44750	0	510	0	510	0	510	0	510	0	510	0	510	0	510	0	510	0	510	510	0	0	0		44750	0	510	0	510	0	510	0	510	0	510	0	510	0	510	0	510	0	510	0	510	510	0	0	0
44860	0	510	0	510	0	510	0	510	0	510	0	510	0	510	0	510	0	510	510	0	0	0		44860	0	510	0	510	0	510	0	510	0	510	0	510	0	510	0	510	0	510	0	510	510	0	0	0
44971	0	510	0	510	0	510	0	510	0	510	0	510	0	510	0	510	0	510	510	0	0	0		44971	0	510	0	510	0	510	0	510	0	510	0	510	0	510	0	510	0	510	0	510	510	0	0	0
45082	0	510	0	510	0	510	0	510	0	510	0	510	0	510	0	510	0	510	510	0	0	0		45082	0	510	0	510	0	510	0	510	0	510	0	510	0	510	0	510	0	510	0	510	510	0	0	0
45193	0	510	0	510	0	510	0	510	0	510	0	510	0	510	0	510	0	510	510	0	0	0		45193	0	510	0	510	0	510	0	510	0	510	0	510	0	510	0	510	0	510	0	510	510	0	0	0
45303	0	510	0	510	0	510	0	510	0	510	0	510	0	510	0	510	0	510	510	0	0	0		45303	0	510	0	510	0	510	0	510	0	510	0	510	0	510	0	510	0	510	0	510	510	0	0	0
45414	0	510	0	510	0	510	0	510	0	510	0	510	0	510	0	510	0	510	510	0	0	0		45414	0	510	0	510	0	510	0	510	0	510	0	510	0	510	0	510	0	510	0	510	510	0	0	0
45525	0	510	0	510	0	510	0	510	0	510	0	510	0	510	0	510	0	510	510	0	0	0		45525	0	510	0	510	0	510	0	510	0	510	0	510	0	510	0	510	0	510	0	510	510	0	0	0
45636	0	510	0	510	0	510	0	510	0	510	0	510	0	510	0	510	0	510	510	0	0	0		45636	0	510	0	510	0	510	0	510	0	510	0	510	0	510	0	510	0	510	0	510	510	0	0	0
45747	0	510	0	510	0	510	0	510	0	510	0	510	0	510	0	510	0	510	510	0	0	0		45747	0	510	0	510	0	510	0	510	0	510	0	510	0	510	0	510	0	510	0	510	510	0	0	0
45857	0	510	0	510	0	510	0	510	0	510	0	510	0	510	0	510	0	510	510	0	0	0		45857	0	510	0	510	0	510	0	510	0	510	0	510	0	510	0	510	0	510	0	510	510	0	0	0
45968	0	510	0	510	0	510	0	510	0	510	0	510	0	510	0	510	0	510	510	0	0	0		45968	0	510	0	510	0	510	0	510	0	510	0	510	0	510	0	510	0	510	0	510	510	0	0	0
46079	0	510	0	510	0	510	0	510	0	510	0	510	0	510	0	510	0	510	510	0	0	0		46079	0	510	0	510	0	510	0	510	0	510	0	510	0	510	0	510	0	510	0	510	510	0	0	0
46190	0	510	0	510	0	510	0	510	0	510	0	510	0	510	0	510	0	510	510	0	0	0		46190	0	510	0	510	0	510	0	510	0	510	0	510	0	510	0	510	0	510	0	510	510	0	0	0
46300	0	510	0	510	0	510	0	510	0	510	0	510	0	510	0	510	0	510	510	0	0	0		46300	0	510	0	510	0	510	0	510	0	510	0	510	0	510	0	510	0	510	0	510	510	0	0	0
46411	0	510	0	510	0	510	0	510	0	510	0	510	0	510	0	510	0	510	510	0	0	0		46411	0	510	0	510	0	510	0	510	0	510	0	510	0	510	0	510	0	510	0	510	510	0	0	0
46522	0	510	0	510	0	510	0	510	0	510	0	510	0	510	0	510	0	510	510	0	0	0		46522	0	510	0	510	0	510	0	510	0	510	0	510	0	510	0	510	0	510	0	510	510	0	0	0
46633	0	510	0	510	0	510	0	510	0	510	0	510	0	510	0	510	0	510	510	0	0	0		46633	0	510	0	510	0	510	0	510	0	510	0	510	0	510	0	510	0	510	0	510	510	0	0	0
46743	0	510	0	510	0	510	0	510	0	510	0	510	0	510	0	510	0	510	510	0	0	0		46743	0	510	0	510	0	510	0	510	0	510	0	510	0	510	0	510	0	510	0	510	510	0	0	0
46854	0	510	0	510	0	510	0	510	0	510	0	510	0	510	0	510	0	510	510	0	0	0		46854	0	510	0	510	0	510	0	510	0	510	0	510	0	510	0	510	0	510	0	510	510	0	0	0
46965	0	510	0	510	0	510	0	510	0	510	0	510	0	510	0	510	0	510	510	0	0	0		46965	0	510	0	510	0	510	0	510	0	510	0	510	0	510	0	510	0	510	0	510	510	0	0	0
47076	0	510	0	510	0	510	0	510	0	510	0	510	0	510	0	510	0	510	510	0	0	0		47076	0	510	0	510	0	510	0	510	0	510	0	510	0	510	0	510	0	510	0	510	510	0	0	0
47186	0	510	0	510	0	510	0	510	0	510	0	510	0	510	0	510	0	510	510	0	0	0		47186	0	510	0	510	0	510	0	510	0	510	0	510	0	510	0	510	0	510	0	510	510	0	0	0
47297	0	510	0	510	0	510	0	510	0	510	0	510	0	510	0	510	0	510	510	0	0	0		47297	0	510	0	510	0	510	0	510	0	510	0	510	0	510	0	510	0	510	0	510	510	0	0	0
47408	0	510	0	510	0	510	0	510	0	510	0	510	0	510	0	510	0	510	510	0	0	0		47408	0	510	0	510	0	510	0	510	0	510	0	510	0	510	0	510	0	510	0	510	510	0	0	0
47519	0	510	0	510	0	510	0	510	0	510	0	510	0	510	0	510	0	510	510	0	0	0		47519	0	510	0	510	0	510	0	510	0	510	0	510	0	510	0	510	0	510	0	510	510	0	0	0
47630	0	510	0	510	0	510	0	510	0	510	0	510	0	510	0	510	0	510	510	0	0	0		47630	0	510	0	510	0	510	0	510	0	510	0	510	0	510	0	510	0	510	0	510	510	0	0	0
47740	0	510	0	510	0	510	0	510	0	510	0	510	0	510	0	510	0	510	510	0	0	0		47740	0	510	0	510	0	510	0	510	0	510	0	510	0	510	0	510	0	510	0	510	510	0	0	0
47851	0	510	0	510	0	510	0	510	0	510	0	510	0	510	0	510	0	510	510	0	0	0		47851	0	510	0	510	0	510	0	510	0	510	0	510	0	510	0	510	0	510	0	510	510	0	0	0
47962	0	510	0	510	0	510	0	510	0	510	0	510	0	510	0	510	0	510	510	0	0	0		47962	0	510	0	510	0	510	0	510	0	510	0	510	0	510	0	510	0	510	0	510	510	0	0	0
48073	0	510	0	510	0	510	0	510	0	510	0	510	0	510	0	510	0	510	510	0	0	0		48073	0	510	0	510	0	510	0	510	0	510	0	510	0	510	0	510	0	510	0	510	510	0	0	0
48183	0	510	0	510	0	510	0	510	0	510	0	510	0	510	0	510	0	510	510	0	0	0		48183	0	510	0	510	0	510	0	510	0	510	0	510	0	510	0	510	0	510	0	510	510	0	0	0
48294	0	510	0	510	0	510	0	510	0	510	0	510	0	510	0	510	0	510	510	0	0	0		48294	0	510	0	510	0	510	0	510	0	510	0	510	0	510	0	510	0	510	0	510	510	0	0	0
48405	0	510	0	510	0	510	0	510	0	510	0	510	0	510	0	510	0	510	510	0	0	0		48405	0	510	0	510	0	510	0	510	0	510	0	510	0	510	0	510	0	510	0	510	510	0	0	0
48516	0	510	0	510	0	510	0	510	0	510	0	510	0	510	0	510	0	510	510	0	0	0		48516	0	510	0	510	0	510	0	510	0	510	0	510	0	510	0	510	0	510	0	510	510	0	0	0
48626	0	510	0	510	0	510	0	510	0	510	0	510	0	510	0	510	0	510	510	0	0	0		48626	0	510	0	510	0	510	0	510	0	510	0	510	0	510	0	510	0	510	0	510	510	0	0	0
48737	0	510	0	510	0	510	0	510	0	510	0	510	0	510	0	510	0	510	510	0	0	0		48737	0	510	0	510	0	510	0	510	0	510	0	510	0	510	0	510	0	510	0	510	510	0	0	0
48848	0	510	0	510	0	510	0	510	0	510	0	510	0	510	0	510	0	510	510	0	0	0		48848	0	510	0	510	0	510	0	510	0	510	0	510	0	510	0	510	0	510	0	510	510	0	0	0
48959	0	510	0	510	0	510	0	510	0	510	0	510	0	510	0	510	0	510	510	0	0	0		48959	0	510	0	510	0	510	0	510	0	510	0	510	0	510	0	510	0	510	0	510	510	0	0	0
49069	0	510	0	510	0	510	0	510	0	510	0	510	0	510	0	510	0	510	510	0	0	0		49069	0	510	0	510	0	510	0	510	0	510	0	510	0	510	0	510	0	510	0	510	510	0	0	0
49180	0	510	0	510	0	510	0	510	0	510	0	510	0	510	0	510	0	510	510	0	0	0		49180	0	510	0	510	0	510	0	510	0	510	0	510	0	510	0	510	0	510	0	510	510	0	0	0
49291	0	510	0	510	0	510	0	510	0	510	0	510	0	510	0	510	0	510	510	0	0	0		49291	0	510	0	510	0	510	0	510	0	510	0	510	0	510	0	510	0	510	0	510	510	0	0	0
49402	0	510	0	510	0	510	0	510	0	510	0	510	0	510	0	510	0	510	510	0	0	0		49402	0	510	0	510	0	510	0	510	0	510	0	510	0	510	0	510	0	510	0	510	510	0	0	0
49513	0	510	0	510	0	510	0	510	0	510	0	510	0	510	0	510	0	510	510	0	0	0		49513	0	510	0	510	0	510	0	510	0	510	0	510	0	510	0	510	0	510	0	510	510	0	0	0
49623	0	510	0	510	0	510	0	510	0	510	0	510	0	510	0	510	0	510	510	0	0	0		49623	0	510	0	510	0	510	0	510	0	510	0	510	0	510	0	510	0	510	0	510	510	0	0	0
49734	0	510	0	510	0	510	0	510	0	510	0	510	0	510	0	510	0	510	510	0	0	0		49734	0	510	0	510	0	510	0	510	0	510	0	510	0	510	0	510	0	510	0	510	510	0	0	0
49845	0	510	0	510	0	510	0	510	0	510	0	510	0	510	0	510	0	510	510	0	0	0		49845	0	510	0	510	0	510	0	510	0	510	0	510	0	510	0	510	0	510	0	510	510	0	0	0
49956	0	510	0	510	0	510	0	510	0	510	0	510	0	510	0	510	0	510	510	0	0	0		49956	0	510	0	510	0	510	0	510	0	510	0	510	0	510	0	510	0	510	0	510	510	0	0	0
50066	0	510	0	510	0	510	0	510	0	510	0	510	0	510	0	510	0	510	510	0	0	0		50066	0	510	0	510	0	510	0	510	0	510	0	510	0	510	0	510	0	510	0	510	510	0	0	0
50177	0	510	0	510	0	510	0	510	0	510	0	510	0	510	0	510	0	510	510	0	0	0		50177	0	510	0	510	0	510	0	510	0	510	0	510	0	510	0	510	0	510	0	510	510	0	0	0
50288	0	510	0	510	0	510	0	510	0	510	0	510	0	510	0	510	0	510	510	0	0	0		50288	0	510	0	510	0	510	0	510	0	510	0	510	0	510	0	510	0	510	0	510	510	0	0	0
50399	0	510	0	510	0	510	0	510	0	510	0	510	0	510	0	510	0	510	510	0	0	0		50399	0	510	0	510	0	510	0	510	0	510	0	510	0	510	0	510	0	510	0	510	510	0	0	0
50509	0	510	0	510	0	510	0	510	0	510	0	510	0	510	0	510	0	510	510	0	0	0		50509	0	510	0	510	0	510	0	510	0	510	0	510	0	510	0	510	0	510	0	510	510	0	0	0
50620	0	510	0	510	0	510	0	510	0	510	0	510	0	510	0	510	0	510	510	0	0	0		50620	0	510	0	510	0	510	0	510	0	510	0	510	0	510	0	510	0	510	0	510	510	0	0	0
50731	0	510	0	510	0	510	0	510	0	510	0	510	0	510	0	510	0	510	510	0	0	0		50731	0	510	0	510	0	510	0	510	0	510	0	510	0	510	0	510	0	510	0	510	510	0	0	0
50842	0	510	0	510	0	510	0	510	0	510	0	510	0	510	0	510	0	510	510	0	0	0		50842	0	510	0	510	0	510	0	510	0	510	0	510	0	510	0	510	0	510	0	510	510	0	0	0
50953	0	510	0	510	0	510	0	510	0	510	0	510	0	510	0	510	0	510	510	0	0	0		50953	0	510	0	510	0	510	0	510	0	510	0	510	0	510	0	510	0	510	0	510	510	0	0	0
51063	0	510	0	510	0	510	0	510	0	510	0	510	0	510	0	510	0	510	510	0	0	0		51063	0	510	0	510	0	510	0	510	0	510	0	510	0	510	0	510	0	510	0	510	510	0	0	0
51174	0	510	0	510	0	510	0	510	0	510	0	510	0	510	0	510	0	510	510	0	0	0		51174	0	510	0	510	0	510	0	510	0	510	0	510	0	510	0	510	0	510	0	510	510	0	0	0
51285	0	510	0	510	0	510	0	510	0	510	0	510	0	510	0	510	0	510	510	0	0	0		51285	0	510	0	510	0	510	0	510	0	510	0	510	0	510	0	510	0	510	0	510	510	0	0	0
51396	0	510	0	510	0	510	0	510	0	510	0	510	0	510	0	510	0	510	510	0	0	0		51396	0	510	0	510	0	510	0	510	0	510	0	510	0	510	0	510	0	510	0	510	510	0	0	0
51506	0	510	0	510	0	510	0	510	0	510	0	510	0	510	0	510	0	510	510	0	0	0		51506	0	510	0	510	0	510	0	510	0	510	0	510	0	510	0	510	0	510	0	510	510	0	0	0
51617	0	510	0	510	0	510	0	510	0	510	0	510	0	510	0	510	0	510	510	0	0	0		51617	0	510	0	510	0	510	0	510	0	510	0	510	0	510	0	510	0	510	0	510	510	0	0	0
51728	0	510	0	510	0	510	0	510	0	510	0	510	0	510	0	510	0	510	510	0	0	0		51728	0	510	0	510	0	510	0	510	0	510	0	510	0	510	0	510	0	510	0	510	510	0	0	0
51839	0	510	0	510	0	510	0	510	0	510	0	510	0	510	0	510	0	510	510	0	0	0		51839	0	510	0	510	0	510	0	510	0	510	0	510	0	510	0	510	0	510	0	510	510	0	0	0
51949	0	510	0	510	0	510	0	510	0	510	0	510	0	510	0	510	0	510	510	0	0	0		51949	0	510	0	510	0	510	0	510	0	510	0	510	0	510	0	510	0	510	0	510	510	0	0	0
52060	0	510	0	510	0	510	0	510	0	510	0	510	0	510	0	510	0	510	510	0	0	0		52060	0	510	0	510	0	510	0	510	0	510	0	510	0	510	0	510	0	510	0	510	510	0	0	0
52171	0	510	0	510	0	510	0	510	0	510	0	510	0	510	0	510	0	510	510	0	0	0		52171	0	510	0	510	0	510	0	510	0	510	0	510	0	510	0	510	0	510	0	510	510	0	0	0
52282	0	510	0	510	0	510	0	510	0	510	0	510	0	510	0	510	0	510	510	0	0	0		52282	0	510	0	510	0	510	0	510	0	510	0	510	0	510	0	510	0	510	0	510	510	0	0	0
52392	0	510	0	510	0	510	0	510	0	510	0	510	0	510	0	510	0	510	510	0	0	0		52392	0	510	0	510	0	510	0	510	0	510	0	510	0	510	0	510	0	510	0	510	510	0	0	0
52503	0	510	0	510	0	510	0	510	0	510	0	510	0	510	0	510	0	510	510	0	0	0		52503	0	510	0	510	0	510	0	510	0	510	0	510	0	510	0	510	0	510	0	510	510	0	0	0
52614	0	510	0	510	0	510	0	510	0	510	0	510	0	510	0	510	0	510	510	0	0	0		52614	0	510	0	510	0	510	0	510	0	510	0	510	0	510	0	510	0	510	0	510	510	0	0	0
52725	0	510	0	510	0	510	0	510	0	510	0	510	0	510	0	510	0	510	510	0	0	0		52725	0	510	0	510	0	510	0	510	0	510	0	510	0	510	0	510	0	510	0	510	510	0	0	0
52836	0	510	0	510	0	510	0	510	0	510	0	510	0	510	0	510	0	510	510	0	0	0		52836	0	510	0	510	0	510	0	510	0	510	0	510	0	510	0	510	0	510	0	510	510	0	0	0
52946	0	510	0	510	0	510	0	510	0	510	0	510	0	510	0	510	0	510	510	0	0	0		52946	0	510	0	510	0	510	0	510	0	510	0	510	0	510	0	510	0	510	0	510	510	0	0	0
53057	0	510	0	510	0	510	0	510	0	510	0	510	0	510	0	510	0	510	510	0	0	0		53057	0	510	0	510	0	510	0	510	0	510	0	510	0	510	0	510	0	510	0	510	510	0	0	0
53168	0	510	0	510	0	510	0	510	0	510	0	510	0	510	0	510	0	510	510	0	0	0		53168	0	510	0	510	0	510	0	510	0	510	0	510	0	510	0	510	0	510	0	510	510	0	0	0
53279	0	510	0	510	0	510	0	510	0	510	0	510	0	510	0	510	0	510	510	0	0	0		53279	0	510	0	510	0	510	0	510	0	510	0	510	0	510	0	510	0	510	0	510	510	0	0	0
53389	0	510	0	510	0	510	0	510	0	510	0	510	0	510	0	510	0	510	510	0	0	0		53389	0	510	0	510	0	510	0	510	0	510	0	510	0	510	0	510	0	510	0	510	510	0	0	0
53500	0	510	0	510	0	510	0	510	0	510	0	510	0	510	0	510	0	510	510	0	0	0		53500	0	510	0	510	0	510	0	510	0	510	0	510	0	510	0	510	0	510	0	510	510	0	0	0
53611	0	510	0	510	0	510	0	510	0	510	0	510	0	510	0	510	0	510	510	0	0	0		53611	0	510	0	510	0	510	0	510	0	510	0	510	0	510	0	510	0	510	0	510	510	0	0	0
53722	0	510	0	510	0	510	0	510	0	510	0	510	0	510	0	510	0	510	510	0	0	0		53722	0	510	0	510	0	510	0	510	0	510	0	510	0	510	0	510	0	510	0	510	510	0	0	0
53832	0	510	0	510	0	510	0	510	0	510	0	510	0	510	0	510	0	510	510	0	0	0		53832	0	510	0	510	0	510	0	510	0	510	0	510	0	510	0	510	0	510	0	510	510	0	0	0
53943	0	510	0	510	0	510	0	510	0	510	0	510	0	510	0	510	0	510	510	0	0	0		53943	0	510	0	510	0	510	0	510	0	510	0	510	0	510	0	510	0	510	0	510	510	0	0	0
54054	0	510	0	510	0	510	0	510	0	510	0	510	0	510	0	510	0	510	510	0	0	0		54054	0	510	0	510	0	510	0	510	0	510	0	510	0	510	0	510	0	510	0	510	510	0	0	0
54165	0	510	0	510	0	510	0	510	0	510	0	510	0	510	0	510	0	510	510	0	0	0		54165	0	510	0	510	0	510	0	510	0	510	0	510	0	510	0	510	0	510	0	510	510	0	0	0
54276	0	510	0	510	0	510	0	510	0	510	0	510	0	510	0	510	0	510	510	0	0	0		54276	0	510	0	510	0	510	0	510	0	510	0	510	0	510	0	510	0	510	0	510	510	0	0	0
54386	0	510	0	510	0	510	0	510	0	510	0	510	0	510	0	510	0	510	510	0	0	0		54386	0	510	0	510	0	510	0	510	0	510	0	510	0	510	0	510	0	510	0	510	510	0	0	0
54497	0	510	0	510	0	510	0	510	0	510	0	510	0	510	0	510	0	510	510	0	0	0		54497	0	510	0	510	0	510	0	510	0	510	0	510	0	510	0	510	0	510	0	510	510	0	0	0
54608	0	510	0	510	0	510	0	510	0	510	0	510	0	510	0	510	0	510	510	0	0	0		54608	0	510	0	510	0	510	0	510	0	510	0	510	0	510	0	510	0	510	0	510	510	0	0	0
54719	0	510	0	510	0	510	0	510	0	510	0	510	0	510	0	510	0	510	510	0	0	0		54719	0	510	0	510	0	510	0	510	0	510	0	510	0	510	0	510	0	510	0	510	510	0	0	0
54829	0	510	0	510	0	510	0	510	0	510	0	510	0	510	0	510	0	510	510	0	0	0		54829	0	510	0	510	0	510	0	510	0	510	0	510	0	510	0	510	0	510	0	510	510	0	0	0
54940	0	510	0	510	0	510	0	510	0	510	0	510	0	510	0	510	0	510	510	0	0	0		54940	0	510	0	510	0	510	0	510	0	510	0	510	0	510	0	510	0	510	0	510	510	0	0	0
55051	0	510	0	510	0	510	0	510	0	510	0	510	0	510	0	510	0	510	510	0	0	0		55051	0	510	0	510	0	510	0	510	0	510	0	510	0	510	0	510	0	510	0	510	510	0	0	0
55162	0	510	0	510	0	510	0	510	0	510	0	510	0	510	0	510	0	510	510	0	0	0		55162	0	510	0	510	0	510	0	510	0	510	0	510	0	510	0	510	0	510	0	510	510	0	0	0
55272	0	510	0	510	0	510	0	510	0	510	0	510	0	510	0	510	0	510	510	0	0	0		55272	0	510	0	510	0	510	0	510	0	510	0	510	0	510	0	510	0	510	0	510	510	0	0	0
55383	0	510	0	510	0	510	0	510	0	510	0	510	0	510	0	510	0	510	510	0	0	0		55383	0	510	0	510	0	510	0	510	0	510	0	510	0	510	0	510	0	510	0	510	510	0	0	0
55494	0	510	0	510	0	510	0	510	0	510	0	510	0	510	0	510	0	510	510	0	0	0		55494	0	510	0	510	0	510	0	510	0	510	0	510	0	510	0	510	0	510	0	510	510	0	0	0
55605	0	510	0	510	0	510	0	510	0	510	0	510	0	510	0	510	0	510	510	0	0	0		55605	0	510	0	510	0	510	0	510	0	510	0	510	0	510	0	510	0	510	0	510	510	0	0	0
55715	0	510	0	510	0	510	0	510	0	510	0	510	0	510	0	510	0	510	510	0	0	0		55715	0	510	0	510	0	510	0	510	0	510	0	510	0	510	0	510	0	510	0	510	510	0	0	0
55826	0	510	0	510	0	510	0	510	0	510	0	510	0	510	0	510	0	510	510	0	0	0		55826	0	510	0	510	0	510	0	510	0	510	0	510	0	510	0	510	0	510	0	510	510	0	0	0
55937	0	510	0	510	0	510	0	510	0	510	0	510	0	510	0	510	0	510	510	0	0	0		55937	0	510	0	510	0	510	0	510	0	510	0	510	0	510	0	510	0	510	0	510	510	0	0	0
56048	0	510	0	510	0	510	0	510	0	510	0	510	0	510	0	510	0	510	510	0	0	0		56048	0	510	0	510	0	510	0	510	0	510	0	510	0	510	0	510	0	510	0	510	510	0	0	0
56159	0	510	0	510	0	510	0	510	0	510	0	510	0	510	0	510	0	510	510	0	0	0		56159	0	510	0	510	0	510	0	510	0	510	0	510	0	510	0	510	0	510	0	510	510	0	0	0
56269	0	510	0	510	0	510	0	510	0	510	0	510	0	510	0	510	0	510	510	0	0	0		56269	0	510	0	510	0	510	0	510	0	510	0	510	0	510	0	510	0	510	0	510	510	0	0	0
56380	0	510	0	510	0	510	0	510	0	510	0	510	0	510	0	510	0	510	510	0	0	0		56380	0	510	0	510	0	510	0	510	0	510	0	510	0	510	0	510	0	510	0	510	510	0	0	0
56491	0	510	0	510	0	510	0	510	0	510	0	510	0	510	0	510	0	510	510	0	0	0		56491	0	510	0	510	0	510	0	510	0	510	0	510	0	510	0	510	0	510	0	510	510	0	0	0
56602	0	510	0	510	0	510	0	510	0	510	0	510	0	510	0	510	0	510	510	0	0	0		56602	0	510	0	510	0	510	0	510	0	510	0	510	0	510	0	510	0	510	0	510	510	0	0	0
56712	0	510	0	510	0	510	0	510	0	510	0	510	0	510	0	510	0	510	510	0	0	0		56712	0	510	0	510	0	510	0	510	0	510	0	510	0	510	0	510	0	510	0	510	510	0	0	0
56823	0	510	0	510	0	510	0	510	0	510	0	510	0	510	0	510	0	510	510	0	0	0		56823	0	510	0	510	0	510	0	510	0	510	0	510	0	510	0	510	0	510	0	510	510	0	0	0
56934	0	510	0	510	0	510	0	510	0	510	0	510	0	510	0	510	0	510	510	0	0	0		56934	0	510	0	510	0	510	0	510	0	510	0	510	0	510	0	510	0	510	0	510	510	0	0	0
57045	0	510	0	510	0	510	0	510	0	510	0	510	0	510	0	510	0	510	510	0	0	0		57045	0	510	0	510	0	510	0	510	0	510	0	510	0	510	0	510	0	510	0	510	510	0	0	0
57155	0	510	0	510	0	510	0	510	0	510	0	510	0	510	0	510	0	510	510	0	0	0		57155	0	510	0	510	0	510	0	510	0	510	0	510	0	510	0	510	0	510	0	510	510	0	0	0
57266	0	510	0	510	0	510	0	510	0	510	0	510	0	510	0	510	0	510	510	0	0	0		57266	0	510	0	510	0	510	0	510	0	510	0	510	0	510	0	510	0	510	0	510	510	0	0	0
57377	0	510	0	510	0	510	0	510	0	510	0	510	0	510	0	510	0	510	510	0	0	0		57377	0	510	0	510	0	510	0	510	0	510	0	510	0	510	0	510	0	510	0	510	510	0	0	0
57488	0	510	0	510	0	510	0	510	0	510	0	510	0	510	0	510	0	510	510	0	0	0		57488	0	510	0	510	0	510	0	510	0	510	0	510	0	510	0	510	0	510	0	510	510	0	0	0
57599	0	510	0	510	0	510	0	510	0	510	0	510	0	510	0	510	0	510	510	0	0	0		57599	0	510	0	510	0	510	0	510	0	510	0	510	0	510	0	510	0	510	0	510	510	0	0	0
57709	0	510	0	510	0	510	0	510	0	510	0	510	0	510	0	510	0	510	510	0	0	0		57709	0	510	0	510	0	510	0	510	0	510	0	510	0	510	0	510	0	510	0	510	510	0	0	0
57820	0	510	0	510	0	510	0	510	0	510	0	510	0	510	0	510	0	510	510	0	0	0		57820	0	510	0	510	0	510	0	510	0	510	0	510	0	510	0	510	0	510	0	510	510	0	0	0
57931	0	510	0	510	0	510	0	510	0	510	0	510	0	510	0	510	0	510	510	0	0	0		57931	0	510	0	510	0	510	0	510	0	510	0	510	0	510	0	510	0	510	0	510	510	0	0	0
58042	0	510	0	510	0	510	0	510	0	510	0	510	0	510	0	510	0	510	510	0	0	0		58042	0	510	0	510	0	510	0	510	0	510	0	510	0	510	0	510	0	510	0	510	510	0	0	0
58152	0	510	0	510	0	510	0	510	0	510	0	510	0	510	0	510	0	510	510	0	0	0		58152	0	510	0	510	0	510	0	510	0	510	0	510	0	510	0	510	0	510	0	510	510	0	0	0
58263	0	510	0	510	0	510	0	510	0	510	0	510	0	510	0	510	0	510	510	0	0	0		58263	0	510	0	510	0	510	0	510	0	510	0	510	0	510	0	510	0	510	0	510	510	0	0	0
58374	0	510	0	510	0	510	0	510	0	510	0	510	0	510	0	510	0	510	510	0	0	0		58374	0	510	0	510	0	510	0	510	0	510	0	510	0	510	0	510	0	510	0	510	510	0	0	0
58485	0	510	0	510	0	510	0	510	0	510	0	510	0	510	0	510	0	510	510	0	0	0		58485	0	510	0	510	0	510	0	510	0	510	0	510	0	510	0	510	0	510	0	510	510	0	0	0
58595	0	510	0	510	0	510	0	510	0	510	0	510	0	510	0	510	0	510	510	0	0	0		58595	0	510	0	510	0	510	0	510	0	510	0	510	0	510	0	510	0	510	0	510	510	0	0	0
58706	0	510	0	510	0	510	0	510	0	510	0	510	0	510	0	510	0	510	510	0	0	0		58706	0	510	0	510	0	510	0	510	0	510	0	510	0	510	0	510	0	510	0	510	510	0	0	0
58817	0	510	0	510	0	510	0	510	0	510	0	510	0	510	0	510	0	510	510	0	0	0		58817	0	510	0	510	0	510	0	510	0	510	0	510	0	510	0	510	0	510	0	510	510	0	0	0
58928	0	510	0	510	0	510	0	510	0	510	0	510	0	510	0	510	0	510	510	0	0	0		58928	0	510	0	510	0	510	0	510	0	510	0	510	0	510	0	510	0	510	0	510	510	0	0	0
59038	0	510	0	510	0	510	0	510	0	510	0	510	0	510	0	510	0	510	510	0	0	0		59038	0	510	0	510	0	510	0	510	0	510	0	510	0	510	0	510	0	510	0	510	510	0	0	0
59149	0	510	0	510	0	510	0	510	0	510	0	510	0	510	0	510	0	510	510	0	0	0		59149	0	510	0	510	0	510	0	510	0	510	0	510	0	510	0	510	0	510	0	510	510	0	0	0
59260	0	510	0	510	0	510	0	510	0	510	0	510	0	510	0	510	0	510	510	0	0	0		59260	0	510	0	510	0	510	0	510	0	510	0	510	0	510	0	510	0	510	0	510	510	0	0	0
59371	0	510	0	510	0	510	0	510	0	510	0	510	0	510	0	510	0	510	510	0	0	0		59371	0	510	0	510	0	510	0	510	0	510	0	510	0	510	0	510	0	510	0	510	510	0	0	0
59482	0	510	0	510	0	510	0	510	0	510	0	510	0	510	0	510	0	510	510	0	0	0		59482	0	510	0	510	0	510	0	510	0	510	0	510	0	510	0	510	0	510	0	510	510	0	0	0
59592	0	510	0	510	0	510	0	510	0	510	0	510	0	510	0	510	0	510	510	0	0	0		59592	0	510	0	510	0	510	0	510	0	510	0	510	0	510	0	510	0	510	0	510	510	0	0	0
59703	0	510	0	510	0	510	0	510	0	510	0	510	0	510	0	510	0	510	510	0	0	0		59703	0	510	0	510	0	510	0	510	0	510	0	510	0	510	0	510	0	510	0	510	510	0	0	0
59814	0	510	0	510	0	510	0	510	0	510	0	510	0	510	0	510	0	510	510	0	0	0		59814	0	510	0	510	0	510	0	510	0	510	0	510	0	510	0	510	0	510	0	510	510	0	0	0
59925	0	510	0	510	0	510	0	510	0	510	0	510	0	510	0	510	0	510	510	0	0	0		59925	0	510	0	510	0	510	0	510	0	510	0	510	0	510	0	510	0	510	0	510	510	0	0	0
60035	0	510	0	510	0	510	0	510	0	510	0	510	0	510	0	510	0	510	510	0	0	0		60035	0	510	0	510	0	510	0	510	0	510	0	510	0	510	0	510	0	510	0	510	510	0	0	0
60146	0	510	0	510	0	510	0	510	0	510	0	510	0	510	0	510	0	510	510	0	0	0		60146	0	510	0	510	0	510	0	510	0	510	0	510	0	510	0	510	0	510	0	510	510	0	0	0
60257	0	510	0	510	0	510	0	510	0	510	0	510	0	510	0	510	0	510	510	0	0	0		60257	0	510	0	510	0	510	0	510	0	510	0	510	0	510	0	510	0	510	0	510	510	0	0	0
60368	0	510	0	510	0	510	0	510	0	510	0	510	0	510	0	510	0	510	510	0	0	0		60368	0	510	0	510	0	510	0	510	0	510	0	510	0	510	0	510	0	510	0	510	510	0	0	0
60478	0	510	0	510	0	510	0	510	0	510	0	510	0	510	0	510	0	510	510	0	0	0		60478	0	510	0	510	0	510	0	510	0	510	0	510	0	510	0	510	0	510	0	510	510	0	0	0
60589	0	510	0	510	0	510	0	510	0	510	0	510	0	510	0	510	0	510	510	0	0	0		60589	0	510	0	510	0	510	0	510	0	510	0	510	0	510	0	510	0	510	0	510	510	0	0	0
60700	0	510	0	510	0	510	0	510	0	510	0	510	0	510	0	510	0	510	510	0	0	0		60700	0	510	0	510	0	510	0	510	0	510	0	510	0	510	0	510	0	510	0	510	510	0	0	0
60811	0	510	0	510	0	510	0	510	0	510	0	510	0	510	0	510	0	510	510	0	0	0		60811	0	510	0	510	0	510	0	510	0	510	0	510	0	510	0	510	0	510	0	510	510	0	0	0
60921	0	510	0	510	0	510	0	510	0	510	0	510	0	510	0	510	0	510	510	0	0	0		60921	0	510	0	510	0	510	0	510	0	510	0	510	0	510	0	510	0	510	0	510	510	0	0	0
61032	0	510	0	510	0	510	0	510	0	510	0	510	0	510	0	510	0	510	510	0	0	0		61032	0	510	0	510	0	510	0	510	0	510	0	510	0	510	0	510	0	510	0	510	510	0	0	0
61143	0	510	0	510	0	510	0	510	0	510	0	510	0	510	0	510	0	510	510	0	0	0		61143	0	510	0	510	0	510	0	510	0	510	0	510	0	510	0	510	0	510	0	510	510	0	0	0
61254	0	510	0	510	0	510	0	510	0	510	0	510	0	510	0	510	0	510	510	0	0	0		61254	0	510	0	510	0	510	0	510	0	510	0	510	0	510	0	510	0	510	0	510	510	0	0	0
61365	0	510	0	510	0	510	0	510	0	510	0	510	0	510	0	510	0	510	510	0	0	0		61365	0	510	0	510	0	510	0	510	0	510	0	510	0	510	0	510	0	510	0	510	510	0	0	0
61475	0	510	0	510	0	510	0	510	0	510	0	510	0	510	0	510	0	510	510	0	0	0		61475	0	510	0	510	0	510	0	510	0	510	0	510	0	510	0	510	0	510	0	510	510	0	0	0
61586	0	510	0	510	0	510	0	510	0	510	0	510	0	510	0	510	0	510	510	0	0	0		61586	0	510	0	510	0	510	0	510	0	510	0	510	0	510	0	510	0	510	0	510	510	0	0	0
61697	0	510	0	510	0	510	0	510	0	510	0	510	0	510	0	510	0	510	510	0	0	0		61697	0	510	0	510	0	510	0	510	0	510	0	510	0	510	0	510	0	510	0	510	510	0	0	0
61808	0	510	0	510	0	510	0	510	0	510	0	510	0	510	0	510	0	510	510	0	0	0		61808	0	510	0	510	0	510	0	510	0	510	0	510	0	510	0	510	0	510	0	510	510	0	0	0
61918	0	510	0	510	0	510	0	510	0	510	0	510	0	510	0	510	0	510	510	0	0	0		61918	0	510	0	510	0	510	0	510	0	510	0	510	0	510	0	510	0	510	0	510	510	0	0	0
62029	0	510	0	510	0	510	0	510	0	510	0	510	0	510	0	510	0	510	510	0	0	0		62029	0	510	0	510	0	510	0	510	0	510	0	510	0	510	0	510	0	510	0	510	510	0	0	0
62140	0	510	0	510	0	510	0	510	0	510	0	510	0	510	0	510	0	510	510	0	0	0		62140	0	510	0	510	0	510	0	510	0	510	0	510	0	510	0	510	0	510	0	510	510	0	0	0
62251	0	510	0	510	0	510	0	510	0	510	0	510	0	510	0	510	0	510	510	0	0	0		62251	0	510	0	510	0	510	0	510	0	510	0	510	0	510	0	510	0	510	0	510	510	0	0	0
62361	0	510	0	510	0	510	0	510	0	510	0	510	0	510	0	510	0	510	510	0	0	0		62361	0	510	0	510	0	510	0	510	0	510	0	510	0	510	0	510	0	510	0	510	510	0	0	0
62472	0	510	0	510	0	510	0	510	0	510	0	510	0	510	0	510	0	510	510	0	0	0		62472	0	510	0	510	0	510	0	510	0	510	0	510	0	510	0	510	0	510	0	510	510	0	0	0
62583	0	510	0	510	0	510	0	510	0	510	0	510	0	510	0	510	0	510	510	0	0	0		62583	0	510	0	510	0	510	0	510	0	510	0	510	0	510	0	510	0	510	0	510	510	0	0	0
62694	0	510	0	510	0	510	0	510	0	510	0	510	0	510	0	510	0	510	510	0	0	0		62694	0	510	0	510	0	510	0	510	0	510	0	510	0	510	0	510	0	510	0	510	510	0	0	0
62805	0	510	0	510	0	510	0	510	0	510	0	510	0	510	0	510	0	510	510	0	0	0		62805	0	510	0	510	0	510	0	510	0	510	0	510	0	510	0	510	0	510	0	510	510	0	0	0
62915	0	510	0	510	0	510	0	510	0	510	0	510	0	510	0	510	0	510	510	0	0	0		62915	0	510	0	510	0	510	0	510	0	510	0	510	0	510	0	510	0	510	0	510	510	0	0	0
63026	0	510	0	510	0	510	0	510	0	510	0	510	0	510	0	510	0	510	510	0	0	0		63026	0	510	0	510	0	510	0	510	0	510	0	510	0	510	0	510	0	510	0	510	510	0	0	0
63137	0	510	0	510	0	510	0	510	0	510	0	510	0	510	0	510	0	510	510	0	0	0		63137	0	510	0	510	0	510	0	510	0	510	0	510	0	510	0	510	0	510	0	510	510	0	0	0
63248	0	510	0	510	0	510	0	510	0	510	0	510	0	510	0	510	0	510	510	0	0	0		63248	0	510	0	510	0	510	0	510	0	510	0	510	0	510	0	510	0	510	0	510	510	0	0	0
63358	0	510	0	510	0	510	0	510	0	510	0	510	0	510	0	510	0	510	510	0	0	0		63358	0	510	0	510	0	510	0	510	0	510	0	510	0	510	0	510	0	510	0	510	510	0	0	0
63469	0	510	0	510	0	510	0	510	0	510	0	510	0	510	0	510	0	510	510	0	0	0		63469	0	510	0	510	0	510	0	510	0	510	0	510	0	510	0	510	0	510	0	510	510	0	0	0
63580	0	510	0	510	0	510	0	510	0	510	0	510	0	510	0	510	0	510	510	0	0	0		63580	0	510	0	510	0	510	0	510	0	510	0	510	0	510	0	510	0	510	0	510	510	0	0	0
63691	0	510	0	510	0	510	0	510	0	510	0	510	0	510	0	510	0	510	510	0	0	0		63691	0	510	0	510	0	510	0	510	0	510	0	510	0	510	0	510	0	510	0	510	510	0	0	0
63801	0	510	0	510	0	510	0	510	0	510	0	510	0	510	0	510	0	510	510	0	0	0		63801	0	510	0	510	0	510	0	510	0	510	0	510	0	510	0	510	0	510	0	510	510	0	0	0
63912	0	510	0	510	0	510	0	510	0	510	0	510	0	510	0	510	0	510	510	0	0	0		63912	0	510	0	510	0	510	0	510	0	510	0	510	0	510	0	510	0	510	0	510	510	0	0	0
64023	0	510	0	510	0	510	0	510	0	510	0	510	0	510	0	510	0	510	510	0	0	0		64023	0	510	0	510	0	510	0	510	0	510	0	510	0	510	0	510	0	510	0	510	510	0	0	0
64134	0	510	0	510	0	510	0	510	0	510	0	510	0	510	0	510	0	510	510	0	0	0		64134	0	510	0	510	0	510	0	510	0	510	0	510	0	510	0	510	0	510	0	510	510	0	0	0
64244	0	510	0	510	0	510	0	510	0	510	0	510	0	510	0	510	0	510	510	0	0	0		64244	0	510	0	510	0	510	0	510	0	510	0	510	0	510	0	510	0	510	0	510	510	0	0	0
64355	0	510	0	510	0	510	0	510	0	510	0	510	0	510	0	510	0	510	510	0	0	0		64355	0	510	0	510	0	510	0	510	0	510	0	510	0	510	0	510	0	510	0	510	510	0	0	0
64466	0	510	0	510	0	510	0	510	0	510	0	510	0	510	0	510	0	510	510	0	0	0		64466	0	510	0	510	0	510	0	510	0	510	0	510	0	510	0	510	0	510	0	510	510	0	0	0
64577	0	510	0	510	0	510	0	510	0	510	0	510	0	510	0	510	0	510	510	0	0	0		64577	0	510	0	510	0	510	0	510	0	510	0	510	0	510	0	510	0	510	0	510	510	0	0	0
64688	0	510	0	510	0	510	0	510	0	510	0	510	0	510	0	510	0	510	510	0	0	0		64688	0	510	0	510	0	510	0	510	0	510	0	510	0	510	0	510	0	510	0	510	510	0	0	0
64798	0	510	0	510	0	510	0	510	0	510	0	510	0	510	0	510	0	510	510	0	0	0		64798	0	510	0	510	0	510	0	510	0	510	0	510	0	510	0	510	0	510	0	510	510	0	0	0
64909	0	510	0	510	0	510	0	510	0	510	0	510	0	510	0	510	0	510	510	0	0	0		64909	0	510	0	510	0	510	0	510	0	510	0	510	0	510	0	510	0	510	0	510	510	0	0	0
65020	0	510	0	510	0	510	0	510	0	510	0	510	0	510	0	510	0	510	510	0	0	0		65020	0	510	0	510	0	510	0	510	0	510	0	510	0	510	0	510	0	510	0	510	510	0	0	0
65131	0	510	0	510	0	510	0	510	0	510	0	510	0	510	0	510	0	510	510	0	0	0		65131	0	510	0	510	0	510	0	510	0	510	0	510	0	510	0	510	0	510	0	510	510	0	0	0
65241	0	510	0	510	0	510	0	510	0	510	0	510	0	510	0	510	0	510	510	0	0	0		65241	0	510	0	510	0	510	0	510	0	510	0	510	0	510	0	510	0	510	0	510	510	0	0	0
65352	0	510	0	510	0	510	0	510	0	510	0	510	0	510	0	510	0	510	510	0	0	0		65352	0	510	0	510	0	510	0	510	0	510	0	510	0	510	0	510	0	510	0	510	510	0	0	0
65463	0	510	0	510	0	510	0	510	0	510	0	510	0	510	0	510	0	510	510	0	0	0		65463	0	510	0	510	0	510	0	510	0	510	0	510	0	510	0	510	0	510	0	510	510	0	0	0
65574	0	510	0	510	0	510	0	510	0	510	0	510	0	510	0	510	0	510	510	0	0	0		65574	0	510	0	510	0	510	0	510	0	510	0	510	0	510	0	510	0	510	0	510	510	0	0	0
65684	0	510	0	510	0	510	0	510	0	510	0	510	0	510	0	510	0	510	510	0	0	0		65684	0	510	0	510	0	510	0	510	0	510	0	510	0	510	0	510	0	510	0	510	510	0	0	0
65795	0	510	0	510	0	510	0	510	0	510	0	510	0	510	0	510	0	510	510	0	0	0		65795	0	510	0	510	0	510	0	510	0	510	0	510	0	510	0	510	0	510	0	510	510	0	0	0
65906	0	510	0	510	0	510	0	510	0	510	0	510	0	510	0	510	0	510	510	0	0	0		65906	0	510	0	510	0	510	0	510	0	510	0	510	0	510	0	510	0	510	0	510	510	0	0	0
66017	0	510	0	510	0	510	0	510	0	510	0	510	0	510	0	510	0	510	510	0	0	0		66017	0	510	0	510	0	510	0	510	0	510	0	510	0	510	0	510	0	510	0	510	510	0	0	0
66128	0	510	0	510	0	510	0	510	0	510	0	510	0	510	0	510	0	510	510	0	0	0		66128	0	510	0	510	0	510	0	510	0	510	0	510	0	510	0	510	0	510	0	510	510	0	0	0
66238	0	510	0	510	0	510	0	510	0	510	0	510	0	510	0	510	0	510	510	0	0	0		66238	0	510	0	510	0	510	0	510	0	510	0	510	0	510	0	510	0	510	0	510	510	0	0	0
66349	0	510	0	510	0	510	0	510	0	510	0	510	0	510	0	510	0	510	510	0	0	0		66349	0	510	0	510	0	510	0	510	0	510	0	510	0	510	0	510	0	510	0	510	510	0	0	0
66460	0	510	0	510	0	510	0	510	0	510	0	510	0	510	0	510	0	510	510	0	0	0		66460	0	510	0	510	0	510	0	510	0	510	0	510	0	510	0	510	0	510	0	510	510	0	0	0
66571	0	510	0	510	0	510	0	510	0	510	0	510	0	510	0	510	0	510	510	0	0	0		66571	0	510	0	510	0	510	0	510	0	510	0	510	0	510	0	510	0	510	0	510	510	0	0	0
66681	0	510	0	510	0	510	0	510	0	510	0	510	0	510	0	510	0	510	510	0	0	0		66681	0	510	0	510	0	510	0	510	0	510	0	510	0	510	0	510	0	510	0	510	510	0	0	0
66792	0	510	0	510	0	510	0	510	0	510	0	510	0	510	0	510	0	510	510	0	0	0		66792	0	510	0	510	0	510	0	510	0	510	0	510	0	510	0	510	0	510	0	510	510	0	0	0
66903	0	510	0	510	0	510	0	510	0	510	0	510	0	510	0	510	0	510	510	0	0	0		66903	0	510	0	510	0	510	0	510	0	510	0	510	0	510	0	510	0	510	0	510	510	0	0	0
67014	0	510	0	510	0	510	0	510	0	510	0	510	0	510	0	510	0	510	510	0	0	0		67014	0	510	0	510	0	510	0	510	0	510	0	510	0	510	0	510	0	510	0	510	510	0	0	0
67124	0	510	0	510	0	510	0	510	0	510	0	510	0	510	0	510	0	510	510	0	0	0		67124	0	510	0	510	0	510	0	510	0	510	0	510	0	510	0	510	0	510	0	510	510	0	0	0
67235	0	510	0	510	0	510	0	510	0	510	0	510	0	510	0	510	0	510	510	0	0	0		67235	0	510	0	510	0	510	0	510	0	510	0	510	0	510	0	510	0	510	0	510	510	0	0	0
67346	0	510	0	510	0	510	0	510	0	510	0	510	0	510	0	510	0	510	510	0	0	0		67346	0	510	0	510	0	510	0	510	0	510	0	510	0	510	0	510	0	510	0	510	510	0	0	0
67457	0	510	0	510	0	510	0	510	0	510	0	510	0	510	0	510	0	510	510	0	0	0		67457	0	510	0	510	0	510	0	510	0	510	0	510	0	510	0	510	0	510	0	510	510	0	0	0
67567	0	510	0	510	0	510	0	510	0	510	0	510	0	510	0	510	0	510	510	0	0	0		67567	0	510	0	510	0	510	0	510	0	510	0	510	0	510	0	510	0	510	0	510	510	0	0	0
67678	0	510	0	510	0	510	0	510	0	510	0	510	0	510	0	510	0	510	510	0	0	0		67678	0	510	0	510	0	510	0	510	0	510	0	510	0	510	0	510	0	510	0	510	510	0	0	0
67789	0	510	0	510	0	510	0	510	0	510	0	510	0	510	0	510	0	510	510	0	0	0		67789	0	510	0	510	0	510	0	510	0	510	0	510	0	510	0	510	0	510	0	510	510	0	0	0
67900	0	510	0	510	0	510	0	510	0	510	0	510	0	510	0	510	0	510	510	0	0	0		67900	0	510	0	510	0	510	0	510	0	510	0	510	0	510	0	510	0	510	0	510	510	0	0	0
68011	0	510	0	510	0	510	0	510	0	510	0	510	0	510	0	510	0	510	510	0	0	0		68011	0	510	0	510	0	510	0	510	0	510	0	510	0	510	0	510	0	510	0	510	510	0	0	0
68121	0	510	0	510	0	510	0	510	0	510	0	510	0	510	0	510	0	510	510	0	0	0		68121	0	510	0	510	0	510	0	510	0	510	0	510	0	510	0	510	0	510	0	510	510	0	0	0
68232	0	510	0	510	0	510	0	510	0	510	0	510	0	510	0	510	0	510	510	0	0	0		68232	0	510	0	510	0	510	0	510	0	510	0	510	0	510	0	510	0	510	0	510	510	0	0	0
68343	0	510	0	510	0	510	0	510	0	510	0	510	0	510	0	510	0	510	510	0	0	0		68343	0	510	0	510	0	510	0	510	0	510	0	510	0	510	0	510	0	510	0	510	510	0	0	0
68454	0	510	0	510	0	510	0	510	0	510	0	510	0	510	0	510	0	510	510	0	0	0		68454	0	510	0	510	0	510	0	510	0	510	0	510	0	510	0	510	0	510	0	510	510	0	0	0
68564	0	510	0	510	0	510	0	510	0	510	0	510	0	510	0	510	0	510	510	0	0	0		68564	0	510	0	510	0	510	0	510	0	510	0	510	0	510	0	510	0	510	0	510	510	0	0	0
68675	0	510	0	510	0	510	0	510	0	510	0	510	0	510	0	510	0	510	510	0	0	0		68675	0	510	0	510	0	510	0	510	0	510	0	510	0	510	0	510	0	510	0	510	510	0	0	0
68786	0	510	0	510	0	510	0	510	0	510	0	510	0	510	0	510	0	510	510	0	0	0		68786	0	510	0	510	0	510	0	510	0	510	0	510	0	510	0	510	0	510	0	510	510	0	0	0
68897	0	510	0	510	0	510	0	510	0	510	0	510	0	510	0	510	0	510	510	0	0	0		68897	0	510	0	510	0	510	0	510	0	510	0	510	0	510	0	510	0	510	0	510	510	0	0	0
69007	0	510	0	510	0	510	0	510	0	510	0	510	0	510	0	510	0	510	510	0	0	0		69007	0	510	0	510	0	510	0	510	0	510	0	510	0	510	0	510	0	510	0	510	510	0	0	0
69118	0	510	0	510	0	510	0	510	0	510	0	510	0	510	0	510	0	510	510	0	0	0		69118	0	510	0	510	0	510	0	510	0	510	0	510	0	510	0	510	0	510	0	510	510	0	0	0
69229	0	510	0	510	0	510	0	510	0	510	0	510	0	510	0	510	0	510	510	0	0	0		69229	0	510	0	510	0	510	0	510	0	510	0	510	0	510	0	510	0	510	0	510	510	0	0	0
69340	0	510	0	510	0	510	0	510	0	510	0	510	0	510	0	510	0	510	510	0	0	0		69340	0	510	0	510	0	510	0	510	0	510	0	510	0	510	0	510	0	510	0	510	510	0	0	0
69451	0	510	0	510	0	510	0	510	0	510	0	510	0	510	0	510	0	510	510	0	0	0		69451	0	510	0	510	0	510	0	510	0	510	0	510	0	510	0	510	0	510	0	510	510	0	0	0
69561	0	510	0	510	0	510	0	510	0	510	0	510	0	510	0	510	0	510	510	0	0	0		69561	0	510	0	510	0	510	0	510	0	510	0	510	0	510	0	510	0	510	0	510	510	0	0	0
69672	0	510	0	510	0	510	0	510	0	510	0	510	0	510	0	510	0	510	510	0	0	0		69672	0	510	0	510	0	510	0	510	0	510	0	510	0	510	0	510	0	510	0	510	510	0	0	0
69783	0	510	0	510	0	510	0	510	0	510	0	510	0	510	0	510	0	510	510	0	0	0		69783	0	510	0	510	0	510	0	510	0	510	0	510	0	510	0	510	0	510	0	510	510	0	0	0
69894	0	510	0	510	0	510	0	510	0	510	0	510	0	510	0	510	0	510	510	0	0	0		69894	0	510	0	510	0	510	0	510	0	510	0	510	0	510	0	510	0	510	0	510	510	0	0	0
70004	0	510	0	510	0	510	0	510	0	510	0	510	0	510	0	510	0	510	510	0	0	0		70004	0	510	0	510	0	510	0	510	0	510	0	510	0	510	0	510	0	510	0	510	510	0	0	0
70115	0	510	0	510	0	510	0	510	0	510	0	510	0	510	0	510	0	510	510	0	0	0		70115	0	510	0	510	0	510	0	510	0	510	0	510	0	510	0	510	0	510	0	510	510	0	0	0
70226	0	510	0	510	0	510	0	510	0	510	0	510	0	510	0	510	0	510	510	0	0	0		70226	0	510	0	510	0	510	0	510	0	510	0	510	0	510	0	510	0	510	0	510	510	0	0	0
70337	0	510	0	510	0	510	0	510	0	510	0	510	0	510	0	510	0	510	510	0	0	0		70337	0	510	0	510	0	510	0	510	0	510	0	510	0	510	0	510	0	510	0	510	510	0	0	0
70447	0	510	0	510	0	510	0	510	0	510	0	510	0	510	0	510	0	510	510	0	0	0		70447	0	510	0	510	0	510	0	510	0	510	0	510	0	510	0	510	0	510	0	510	510	0	0	0
70558	0	510	0	510	0	510	0	510	0	510	0	510	0	510	0	510	0	510	510	0	0	0		70558	0	510	0	510	0	510	0	510	0	510	0	510	0	510	0	510	0	510	0	510	510	0	0	0
70669	0	510	0	510	0	510	0	510	0	510	0	510	0	510	0	510	0	510	510	0	0	0		70669	0	510	0	510	0	510	0	510	0	510	0	510	0	510	0	510	0	510	0	510	510	0	0	0
70780	0	510	0	510	0	510	0	510	0	510	0	510	0	510	0	510	0	510	510	0	0	0		70780	0	510	0	510	0	510	0	510	0	510	0	510	0	510	0	510	0	510	0	510	510	0	0	0
70890	0	510	0	510	0	510	0	510	0	510	0	510	0	510	0	510	0	510	510	0	0	0		70890	0	510	0	510	0	510	0	510	0	510	0	510	0	510	0	510	0	510	0	510	510	0	0	0
71001	0	510	0	510	0	510	0	510	0	510	0	510	0	510	0	510	0	510	510	0	0	0		71001	0	510	0	510	0	510	0	510	0	510	0	510	0	510	0	510	0	510	0	510	510	0	0	0
71112	0	510	0	510	0	510	0	510	0	510	0	510	0	510	0	510	0	510	510	0	0	0		71112	0	510	0	510	0	510	0	510	0	510	0	510	0	510	0	510	0	510	0	510	510	0	0	0
71223	0	510	0	510	0	510	0	510	0	510	0	510	0	510	0	510	0	510	510	0	0	0		71223	0	510	0	510	0	510	0	510	0	510	0	510	0	510	0	510	0	510	0	510	510	0	0	0
71334	0	510	0	510	0	510	0	510	0	510	0	510	0	510	0	510	0	510	510	0	0	0		71334	0	510	0	510	0	510	0	510	0	510	0	510	0	510	0	510	0	510	0	510	510	0	0	0
71444	0	510	0	510	0	510	0	510	0	510	0	510	0	510	0	510	0	510	510	0	0	0		71444	0	510	0	510	0	510	0	510	0	510	0	510	0	510	0	510	0	510	0	510	510	0	0	0
71555	0	510	0	510	0	510	0	510	0	510	0	510	0	510	0	510	0	510	510	0	0	0		71555	0	510	0	510	0	510	0	510	0	510	0	510	0	510	0	510	0	510	0	510	510	0	0	0
71666	0	510	0	510	0	510	0	510	0	510	0	510	0	510	0	510	0	510	510	0	0	0		71666	0	510	0	510	0	510	0	510	0	510	0	510	0	510	0	510	0	510	0	510	510	0	0	0
71777	0	510	0	510	0	510	0	510	0	510	0	510	0	510	0	510	0	510	510	0	0	0		71777	0	510	0	510	0	510	0	510	0	510	0	510	0	510	0	510	0	510	0	510	510	0	0	0
71887	0	510	0	510	0	510	0	510	0	510	0	510	0	510	0	510	0	510	510	0	0	0		71887	0	510	0	510	0	510	0	510	0	510	0	510	0	510	0	510	0	510	0	510	510	0	0	0
71998	0	510	0	510	0	510	0	510	0	510	0	510	0	510	0	510	0	510	510	0	0	0		71998	0	510	0	510	0	510	0	510	0	510	0	510	0	510	0	510	0	510	0	510	510	0	0	0
72109	0	510	0	510	0	510	0	510	0	510	0	510	0	510	0	510	0	510	510	0	0	0		72109	0	510	0	510	0	510	0	510	0	510	0	510	0	510	0	510	0	510	0	510	510	0	0	0
72220	0	510	0	510	0	510	0	510	0	510	0	510	0	510	0	510	0	510	510	0	0	0		72220	0	510	0	510	0	510	0	510	0	510	0	510	0	510	0	510	0	510	0	510	510	0	0	0
72330	0	510	0	510	0	510	0	510	0	510	0	510	0	510	0	510	0	510	510	0	0	0		72330	0	510	0	510	0	510	0	510	0	510	0	510	0	510	0	510	0	510	0	510	510	0	0	0
72441	0	510	0	510	0	510	0	510	0	510	0	510	0	510	0	510	0	510	510	0	0	0		72441	0	510	0	510	0	510	0	510	0	510	0	510	0	510	0	510	0	510	0	510	510	0	0	0
72552	0	510	0	510	0	510	0	510	0	510	0	510	0	510	0	510	0	510	510	0	0	0		72552	0	510	0	510	0	510	0	510	0	510	0	510	0	510	0	510	0	510	0	510	510	0	0	0
72663	0	510	0	510	0	510	0	510	0	510	0	510	0	510	0	510	0	510	510	0	0	0		72663	0	510	0	510	0	510	0	510	0	510	0	510	0	510	0	510	0	510	0	510	510	0	0	0
72773	0	510	0	510	0	510	0	510	0	510	0	510	0	510	0	510	0	510	510	0	0	0		72773	0	510	0	510	0	510	0	510	0	510	0	510	0	510	0	510	0	510	0	510	510	0	0	0
72884	0	510	0	510	0	510	0	510	0	510	0	510	0	510	0	510	0	510	510	0	0	0		72884	0	510	0	510	0	510	0	510	0	510	0	510	0	510	0	510	0	510	0	510	510	0	0	0
72995	0	510	0	510	0	510	0	510	0	510	0	510	0	510	0	510	0	510	510	0	0	0		72995	0	510	0	510	0	510	0	510	0	510	0	510	0	510	0	510	0	510	0	510	510	0	0	0
73106	0	510	0	510	0	510	0	510	0	510	0	510	0	510	0	510	0	510	510	0	0	0		73106	0	510	0	510	0	510	0	510	0	510	0	510	0	510	0	510	0	510	0	510	510	0	0	0
73217	0	510	0	510	0	510	0	510	0	510	0	510	0	510	0	510	0	510	510	0	0	0		73217	0	510	0	510	0	510	0	510	0	510	0	510	0	510	0	510	0	510	0	510	510	0	0	0
73327	0	510	0	510	0	510	0	510	0	510	0	510	0	510	0	510	0	510	510	0	0	0		73327	0	510	0	510	0	510	0	510	0	510	0	510	0	510	0	510	0	510	0	510	510	0	0	0
73438	0	510	0	510	0	510	0	510	0	510	0	510	0	510	0	510	0	510	510	0	0	0		73438	0	510	0	510	0	510	0	510	0	510	0	510	0	510	0	510	0	510	0	510	510	0	0	0
73549	0	510	0	510	0	510	0	510	0	510	0	510	0	510	0	510	0	510	510	0	0	0		73549	0	510	0	510	0	510	0	510	0	510	0	510	0	510	0	510	0	510	0	510	510	0	0	0
73660	0	510	0	510	0	510	0	510	0	510	0	510	0	510	0	510	0	510	510	0	0	0		73660	0	510	0	510	0	510	0	510	0	510	0	510	0	510	0	510	0	510	0	510	510	0	0	0
73770	0	510	0	510	0	510	0	510	0	510	0	510	0	510	0	510	0	510	510	0	0	0		73770	0	510	0	510	0	510	0	510	0	510	0	510	0	510	0	510	0	510	0	510	510	0	0	0
73881	0	510	0	510	0	510	0	510	0	510	0	510	0	510	0	510	0	510	510	0	0	0		73881	0	510	0	510	0	510	0	510	0	510	0	510	0	510	0	510	0	510	0	510	510	0	0	0
73992	0	510	0	510	0	510	0	510	0	510	0	510	0	510	0	510	0	510	510	0	0	0		73992	0	510	0	510	0	510	0	510	0	510	0	510	0	510	0	510	0	510	0	510	510	0	0	0
74103	0	510	0	510	0	510	0	510	0	510	0	510	0	510	0	510	0	510	510	0	0	0		74103	0	510	0	510	0	510	0	510	0	510	0	510	0	510	0	510	0	510	0	510	510	0	0	0
74213	0	510	0	510	0	510	0	510	0	510	0	510	0	510	0	510	0	510	510	0	0	0		74213	0	510	0	510	0	510	0	510	0	510	0	510	0	510	0	510	0	510	0	510	510	0	0	0
74324	0	510	0	510	0	510	0	510	0	510	0	510	0	510	0	510	0	510	510	0	0	0		74324	0	510	0	510	0	510	0	510	0	510	0	510	0	510	0	510	0	510	0	510	510	0	0	0
74435	0	510	0	510	0	510	0	510	0	510	0	510	0	510	0	510	0	510	510	0	0	0		74435	0	510	0	510	0	510	0	510	0	510	0	510	0	510	0	510	0	510	0	510	510	0	0	0
74546	0	510	0	510	0	510	0	510	0	510	0	510	0	510	0	510	0	510	510	0	0	0		74546	0	510	0	510	0	510	0	510	0	510	0	510	0	510	0	510	0	510	0	510	510	0	0	0
74657	0	510	0	510	0	510	0	510	0	510	0	510	0	510	0	510	0	510	510	0	0	0		74657	0	510	0	510	0	510	0	510	0	510	0	510	0	510	0	510	0	510	0	510	510	0	0	0
74767	0	510	0	510	0	510	0	510	0	510	0	510	0	510	0	510	0	510	510	0	0	0		74767	0	510	0	510	0	510	0	510	0	510	0	510	0	510	0	510	0	510	0	510	510	0	0	0
74878	0	510	0	510	0	510	0	510	0	510	0	510	0	510	0	510	0	510	510	0	0	0		74878	0	510	0	510	0	510	0	510	0	510	0	510	0	510	0	510	0	510	0	510	510	0	0	0
74989	0	510	0	510	0	510	0	510	0	510	0	510	0	510	0	510	0	510	510	0	0	0		74989	0	510	0	510	0	510	0	510	0	510	0	510	0	510	0	510	0	510	0	510	510	0	0	0
75100	0	510	0	510	0	510	0	510	0	510	0	510	0	510	0	510	0	510	510	0	0	0		75100	0	510	0	510	0	510	0	510	0	510	0	510	0	510	0	510	0	510	0	510	510	0	0	0
75210	0	510	0	510	0	510	0	510	0	510	0	510	0	510	0	510	0	510	510	0	0	0		75210	0	510	0	510	0	510	0	510	0	510	0	510	0	510	0	510	0	510	0	510	510	0	0	0
75321	0	510	0	510	0	510	0	510	0	510	0	510	0	510	0	510	0	510	510	0	0	0		75321	0	510	0	510	0	510	0	510	0	510	0	510	0	510	0	510	0	510	0	510	510	0	0	0
75432	0	510	0	510	0	510	0	510	0	510	0	510	0	510	0	510	0	510	510	0	0	0		75432	0	510	0	510	0	510	0	510	0	510	0	510	0	510	0	510	0	510	0	510	510	0	0	0
75543	0	510	0	510	0	510	0	510	0	510	0	510	0	510	0	510	0	510	510	0	0	0		75543	0	510	0	510	0	510	0	510	0	510	0	510	0	510	0	510	0	510	0	510	510	0	0	0
75653	0	510	0	510	0	510	0	510	0	510	0	510	0	510	0	510	0	510	510	0	0	0		75653	0	510	0	510	0	510	0	510	0	510	0	510	0	510	0	510	0	510	0	510	510	0	0	0
75764	0	510	0	510	0	510	0	510	0	510	0	510	0	510	0	510	0	510	510	0	0	0		75764	0	510	0	510	0	510	0	510	0	510	0	510	0	510	0	510	0	510	0	510	510	0	0	0
75875	0	510	0	510	0	510	0	510	0	510	0	510	0	510	0	510	0	510	510	0	0	0		75875	0	510	0	510	0	510	0	510	0	510	0	510	0	510	0	510	0	510	0	510	510	0	0	0
75986	0	510	0	510	0	510	0	510	0	510	0	510	0	510	0	510	0	510	510	0	0	0		75986	0	510	0	510	0	510	0	510	0	510	0	510	0	510	0	510	0	510	0	510	510	0	0	0
76096	0	510	0	510	0	510	0	510	0	510	0	510	0	510	0	510	0	510	510	0	0	0		76096	0	510	0	510	0	510	0	510	0	510	0	510	0	510	0	510	0	510	0	510	510	0	0	0
76207	0	510	0	510	0	510	0	510	0	510	0	510	0	510	0	510	0	510	510	0	0	0		76207	0	510	0	510	0	510	0	510	0	510	0	510	0	510	0	510	0	510	0	510	510	0	0	0
76318	0	510	0	510	0	510	0	510	0	510	0	510	0	510	0	510	0	510	510	0	0	0		76318	0	510	0	510	0	510	0	510	0	510	0	510	0	510	0	510	0	510	0	510	510	0	0	0
76429	0	510	0	510	0	510	0	510	0	510	0	510	0	510	0	510	0	510	510	0	0	0		76429	0	510	0	510	0	510	0	510	0	510	0	510	0	510	0	510	0	510	0	510	510	0	0	0
76540	0	510	0	510	0	510	0	510	0	510	0	510	0	510	0	510	0	510	510	0	0	0		76540	0	510	0	510	0	510	0	510	0	510	0	510	0	510	0	510	0	510	0	510	510	0	0	0
76650	0	510	0	510	0	510	0	510	0	510	0	510	0	510	0	510	0	510	510	0	0	0		76650	0	510	0	510	0	510	0	510	0	510	0	510	0	510	0	510	0	510	0	510	510	0	0	0
76761	0	510	0	510	0	510	0	510	0	510	0	510	0	510	0	510	0	510	510	0	0	0		76761	0	510	0	510	0	510	0	510	0	510	0	510	0	510	0	510	0	510	0	510	510	0	0	0
76872	0	510	0	510	0	510	0	510	0	510	0	510	0	510	0	510	0	510	510	0	0	0		76872	0	510	0	510	0	510	0	510	0	510	0	510	0	510	0	510	0	510	0	510	510	0	0	0
76983	0	510	0	510	0	510	0	510	0	510	0	510	0	510	0	510	0	510	510	0	0	0		76983	0	510	0	510	0	510	0	510	0	510	0	510	0	510	0	510	0	510	0	510	510	0	0	0
77093	0	510	0	510	0	510	0	510	0	510	0	510	0	510	0	510	0	510	510	0	0	0		77093	0	510	0	510	0	510	0	510	0	510	0	510	0	510	0	510	0	510	0	510	510	0	0	0
77204	0	510	0	510	0	510	0	510	0	510	0	510	0	510	0	510	0	510	510	0	0	0		77204	0	510	0	510	0	510	0	510	0	510	0	510	0	510	0	510	0	510	0	510	510	0	0	0
77315	0	510	0	510	0	510	0	510	0	510	0	510	0	510	0	510	0	510	510	0	0	0		77315	0	510	0	510	0	510	0	510	0	510	0	510	0	510	0	510	0	510	0	510	510	0	0	0
77426	0	510	0	510	0	510	0	510	0	510	0	510	0	510	0	510	0	510	510	0	0	0		77426	0	510	0	510	0	510	0	510	0	510	0	510	0	510	0	510	0	510	0	510	510	0	0	0
77536	0	510	0	510	0	510	0	510	0	510	0	510	0	510	0	510	0	510	510	0	0	0		77536	0	510	0	510	0	510	0	510	0	510	0	510	0	510	0	510	0	510	0	510	510	0	0	0
77647	0	510	0	510	0	510	0	510	0	510	0	510	0	510	0	510	0	510	510	0	0	0		77647	0	510	0	510	0	510	0	510	0	510	0	510	0	510	0	510	0	510	0	510	510	0	0	0
77758	0	510	0	510	0	510	0	510	0	510	0	510	0	510	0	510	0	510	510	0	0	0		77758	0	510	0	510	0	510	0	510	0	510	0	510	0	510	0	510	0	510	0	510	510	0	0	0
77869	0	510	0	510	0	510	0	510	0	510	0	510	0	510	0	510	0	510	510	0	0	0		77869	0	510	0	510	0	510	0	510	0	510	0	510	0	510	0	510	0	510	0	510	510	0	0	0
77980	0	510	0	510	0	510	0	510	0	510	0	510	0	510	0	510	0	510	510	0	0	0		77980	0	510	0	510	0	510	0	510	0	510	0	510	0	510	0	510	0	510	0	510	510	0	0	0
78090	0	510	0	510	0	510	0	510	0	510	0	510	0	510	0	510	0	510	510	0	0	0		78090	0	510	0	510	0	510	0	510	0	510	0	510	0	510	0	510	0	510	0	510	510	0	0	0
78201	0	510	0	510	0	510	0	510	0	510	0	510	0	510	0	510	0	510	510	0	0	0		78201	0	510	0	510	0	510	0	510	0	510	0	510	0	510	0	510	0	510	0	510	510	0	0	0
78312	0	510	0	510	0	510	0	510	0	510	0	510	0	510	0	510	0	510	510	0	0	0		78312	0	510	0	510	0	510	0	510	0	510	0	510	0	510	0	510	0	510	0	510	510	0	0	0
78423	0	510	0	510	0	510	0	510	0	510	0	510	0	510	0	510	0	510	510	0	0	0		78423	0	510	0	510	0	510	0	510	0	510	0	510	0	510	0	510	0	510	0	510	510	0	0	0
78533	0	510	0	510	0	510	0	510	0	510	0	510	0	510	0	510	0	510	510	0	0	0		78533	0	510	0	510	0	510	0	510	0	510	0	510	0	510	0	510	0	510	0	510	510	0	0	0
78644	0	510	0	510	0	510	0	510	0	510	0	510	0	510	0	510	0	510	510	0	0	0		78644	0	510	0	510	0	510	0	510	0	510	0	510	0	510	0	510	0	510	0	510	510	0	0	0
78755	0	510	0	510	0	510	0	510	0	510	0	510	0	510	0	510	0	510	510	0	0	0		78755	0	510	0	510	0	510	0	510	0	510	0	510	0	510	0	510	0	510	0	510	510	0	0	0
78866	0	510	0	510	0	510	0	510	0	510	0	510	0	510	0	510	0	510	510	0	0	0		78866	0	510	0	510	0	510	0	510	0	510	0	510	0	510	0	510	0	510	0	510	510	0	0	0
78976	0	510	0	510	0	510	0	510	0	510	0	510	0	510	0	510	0	510	510	0	0	0		78976	0	510	0	510	0	510	0	510	0	510	0	510	0	510	0	510	0	510	0	510	510	0	0	0
79087	0	510	0	510	0	510	0	510	0	510	0	510	0	510	0	510	0	510	510	0	0	0		79087	0	510	0	510	0	510	0	510	0	510	0	510	0	510	0	510	0	510	0	510	510	0	0	0
79198	0	510	0	510	0	510	0	510	0	510	0	510	0	510	0	510	0	510	510	0	0	0		79198	0	510	0	510	0	510	0	510	0	510	0	510	0	510	0	510	0	510	0	510	510	0	0	0
79309	0	510	0	510	0	510	0	510	0	510	0	510	0	510	0	510	0	510	510	0	0	0		79309	0	510	0	510	0	510	0	510	0	510	0	510	0	510	0	510	0	510	0	510	510	0	0	0
79419	0	510	0	510	0	510	0	510	0	510	0	510	0	510	0	510	0	510	510	0	0	0		79419	0	510	0	510	0	510	0	510	0	510	0	510	0	510	0	510	0	510	0	510	510	0	0	0
79530	0	510	0	510	0	510	0	510	0	510	0	510	0	510	0	510	0	510	510	0	0	0		79530	0	510	0	510	0	510	0	510	0	510	0	510	0	510	0	510	0	510	0	510	510	0	0	0
79641	0	510	0	510	0	510	0	510	0	510	0	510	0	510	0	510	0	510	510	0	0	0		79641	0	510	0	510	0	510	0	510	0	510	0	510	0	510	0	510	0	510	0	510	510	0	0	0
79752	0	510	0	510	0	510	0	510	0	510	0	510	0	510	0	510	0	510	510	0	0	0		79752	0	510	0	510	0	510	0	510	0	510	0	510	0	510	0	510	0	510	0	510	510	0	0	0
79863	0	510	0	510	0	510	0	510	0	510	0	510	0	510	0	510	0	510	510	0	0	0		79863	0	510	0	510	0	510	0	510	0	510	0	510	0	510	0	510	0	510	0	510	510	0	0	0
79973	0	510	0	510	0	510	0	510	0	510	0	510	0	510	0	510	0	510	510	0	0	0		79973	0	510	0	510	0	510	0	510	0	510	0	510	0	510	0	510	0	510	0	510	510	0	0	0
80084	0	510	0	510	0	510	0	510	0	510	0	510	0	510	0	510	0	510	510	0	0	0		80084	0	510	0	510	0	510	0	510	0	510	0	510	0	510	0	510	0	510	0	510	510	0	0	0
80195	0	510	0	510	0	510	0	510	0	510	0	510	0	510	0	510	0	510	510	0	0	0		80195	0	510	0	510	0	510	0	510	0	510	0	510	0	510	0	510	0	510	0	510	510	0	0	0
80306	0	510	0	510	0	510	0	510	0	510	0	510	0	510	0	510	0	510	510	0	0	0		80306	0	510	0	510	0	510	0	510	0	510	0	510	0	510	0	510	0	510	0	510	510	0	0	0
80416	0	510	0	510	0	510	0	510	0	510	0	510	0	510	0	510	0	510	510	0	0	0		80416	0	510	0	510	0	510	0	510	0	510	0	510	0	510	0	510	0	510	0	510	510	0	0	0
80527	0	510	0	510	0	510	0	510	0	510	0	510	0	510	0	510	0	510	510	0	0	0		80527	0	510	0	510	0	510	0	510	0	510	0	510	0	510	0	510	0	510	0	510	510	0	0	0
80638	0	510	0	510	0	510	0	510	0	510	0	510	0	510	0	510	0	510	510	0	0	0		80638	0	510	0	510	0	510	0	510	0	510	0	510	0	510	0	510	0	510	0	510	510	0	0	0
80749	0	510	0	510	0	510	0	510	0	510	0	510	0	510	0	510	0	510	510	0	0	0		80749	0	510	0	510	0	510	0	510	0	510	0	510	0	510	0	510	0	510	0	510	510	0	0	0
80859	0	510	0	510	0	510	0	510	0	510	0	510	0	510	0	510	0	510	510	0	0	0		80859	0	510	0	510	0	510	0	510	0	510	0	510	0	510	0	510	0	510	0	510	510	0	0	0
80970	0	510	0	510	0	510	0	510	0	510	0	510	0	510	0	510	0	510	510	0	0	0		80970	0	510	0	510	0	510	0	510	0	510	0	510	0	510	0	510	0	510	0	510	510	0	0	0
81081	0	510	0	510	0	510	0	510	0	510	0	510	0	510	0	510	0	510	510	0	0	0		81081	0	510	0	510	0	510	0	510	0	510	0	510	0	510	0	510	0	510	0	510	510	0	0	0
81192	0	510	0	510	0	510	0	510	0	510	0	510	0	510	0	510	0	510	510	0	0	0		81192	0	510	0	510	0	510	0	510	0	510	0	510	0	510	0	510	0	510	0	510	510	0	0	0
81303	0	510	0	510	0	510	0	510	0	510	0	510	0	510	0	510	0	510	510	0	0	0		81303	0	510	0	510	0	510	0	510	0	510	0	510	0	510	0	510	0	510	0	510	510	0	0	0
81413	0	510	0	510	0	510	0	510	0	510	0	510	0	510	0	510	0	510	510	0	0	0		81413	0	510	0	510	0	510	0	510	0	510	0	510	0	510	0	510	0	510	0	510	510	0	0	0
81524	0	510	0	510	0	510	0	510	0	510	0	510	0	510	0	510	0	510	510	0	0	0		81524	0	510	0	510	0	510	0	510	0	510	0	510	0	510	0	510	0	510	0	510	510	0	0	0
81635	0	510	0	510	0	510	0	510	0	510	0	510	0	510	0	510	0	510	510	0	0	0		81635	0	510	0	510	0	510	0	510	0	510	0	510	0	510	0	510	0	510	0	510	510	0	0	0
81746	0	510	0	510	0	510	0	510	0	510	0	510	0	510	0	510	0	510	510	0	0	0		81746	0	510	0	510	0	510	0	510	0	510	0	510	0	510	0	510	0	510	0	510	510	0	0	0
81856	0	510	0	510	0	510	0	510	0	510	0	510	0	510	0	510	0	510	510	0	0	0		81856	0	510	0	510	0	510	0	510	0	510	0	510	0	510	0	510	0	510	0	510	510	0	0	0
81967	0	510	0	510	0	510	0	510	0	510	0	510	0	510	0	510	0	510	510	0	0	0		81967	0	510	0	510	0	510	0	510	0	510	0	510	0	510	0	510	0	510	0	510	510	0	0	0
82078	0	510	0	510	0	510	0	510	0	510	0	510	0	510	0	510	0	510	510	0	0	0		82078	0	510	0	510	0	510	0	510	0	510	0	510	0	510	0	510	0	510	0	510	510	0	0	0
82189	0	510	0	510	0	510	0	510	0	510	0	510	0	510	0	510	0	510	510	0	0	0		82189	0	510	0	510	0	510	0	510	0	510	0	510	0	510	0	510	0	510	0	510	510	0	0	0
82299	0	510	0	510	0	510	0	510	0	510	0	510	0	510	0	510	0	510	510	0	0	0		82299	0	510	0	510	0	510	0	510	0	510	0	510	0	510	0	510	0	510	0	510	510	0	0	0
82410	0	510	0	510	0	510	0	510	0	510	0	510	0	510	0	510	0	510	510	0	0	0		82410	0	510	0	510	0	510	0	510	0	510	0	510	0	510	0	510	0	510	0	510	510	0	0	0
82521	0	510	0	510	0	510	0	510	0	510	0	510	0	510	0	510	0	510	510	0	0	0		82521	0	510	0	510	0	510	0	510	0	510	0	510	0	510	0	510	0	510	0	510	510	0	0	0
82632	0	510	0	510	0	510	0	510	0	510	0	510	0	510	0	510	0	510	510	0	0	0		82632	0	510	0	510	0	510	0	510	0	510	0	510	0	510	0	510	0	510	0	510	510	0	0	0
82742	0	510	0	510	0	510	0	510	0	510	0	510	0	510	0	510	0	510	510	0	0	0		82742	0	510	0	510	0	510	0	510	0	510	0	510	0	510	0	510	0	510	0	510	510	0	0	0
82853	0	510	0	510	0	510	0	510	0	510	0	510	0	510	0	510	0	510	510	0	0	0		82853	0	510	0	510	0	510	0	510	0	510	0	510	0	510	0	510	0	510	0	510	510	0	0	0
82964	0	510	0	510	0	510	0	510	0	510	0	510	0	510	0	510	0	510	510	0	0	0		82964	0	510	0	510	0	510	0	510	0	510	0	510	0	510	0	510	0	510	0	510	510	0	0	0
83075	0	510	0	510	0	510	0	510	0	510	0	510	0	510	0	510	0	510	510	0	0	0		83075	0	510	0	510	0	510	0	510	0	510	0	510	0	510	0	510	0	510	0	510	510	0	0	0
83186	0	510	0	510	0	510	0	510	0	510	0	510	0	510	0	510	0	510	510	0	0	0		83186	0	510	0	510	0	510	0	510	0	510	0	510	0	510	0	510	0	510	0	510	510	0	0	0
83296	0	510	0	510	0	510	0	510	0	510	0	510	0	510	0	510	0	510	510	0	0	0		83296	0	510	0	510	0	510	0	510	0	510	0	510	0	510	0	510	0	510	0	510	510	0	0	0
83407	0	510	0	510	0	510	0	510	0	510	0	510	0	510	0	510	0	510	510	0	0	0		83407	0	510	0	510	0	510	0	510	0	510	0	510	0	510	0	510	0	510	0	510	510	0	0	0
83518	0	510	0	510	0	510	0	510	0	510	0	510	0	510	0	510	0	510	510	0	0	0		83518	0	510	0	510	0	510	0	510	0	510	0	510	0	510	0	510	0	510	0	510	510	0	0	0
83629	0	510	0	510	0	510	0	510	0	510	0	510	0	510	0	510	0	510	510	0	0	0		83629	0	510	0	510	0	510	0	510	0	510	0	510	0	510	0	510	0	510	0	510	510	0	0	0
83739	0	510	0	510	0	510	0	510	0	510	0	510	0	510	0	510	0	510	510	0	0	0		83739	0	510	0	510	0	510	0	510	0	510	0	510	0	510	0	510	0	510	0	510	510	0	0	0
83850	0	510	0	510	0	510	0	510	0	510	0	510	0	510	0	510	0	510	510	0	0	0		83850	0	510	0	510	0	510	0	510	0	510	0	510	0	510	0	510	0	510	0	510	510	0	0	0
83961	0	510	0	510	0	510	0	510	0	510	0	510	0	510	0	510	0	510	510	0	0	0		83961	0	510	0	510	0	510	0	510	0	510	0	510	0	510	0	510	0	510	0	510	510	0	0	0
84072	0	510	0	510	0	510	0	510	0	510	0	510	0	510	0	510	0	510	510	0	0	0		84072	0	510	0	510	0	510	0	510	0	510	0	510	0	510	0	510	0	510	0	510	510	0	0	0
84182	0	510	0	510	0	510	0	510	0	510	0	510	0	510	0	510	0	510	510	0	0	0		84182	0	510	0	510	0	510	0	510	0	510	0	510	0	510	0	510	0	510	0	510	510	0	0	0
84293	0	510	0	510	0	510	0	510	0	510	0	510	0	510	0	510	0	510	510	0	0	0		84293	0	510	0	510	0	510	0	510	0	510	0	510	0	510	0	510	0	510	0	510	510	0	0	0
84404	0	510	0	510	0	510	0	510	0	510	0	510	0	510	0	510	0	510	510	0	0	0		84404	0	510	0	510	0	510	0	510	0	510	0	510	0	510	0	510	0	510	0	510	510	0	0	0
84515	0	510	0	510	0	510	0	510	0	510	0	510	0	510	0	510	0	510	510	0	0	0		84515	0	510	0	510	0	510	0	510	0	510	0	510	0	510	0	510	0	510	0	510	510	0	0	0
84625	0	510	0	510	0	510	0	510	0	510	0	510	0	510	0	510	0	510	510	0	0	0		84625	0	510	0	510	0	510	0	510	0	510	0	510	0	510	0	510	0	510	0	510	510	0	0	0
84736	0	510	0	510	0	510	0	510	0	510	0	510	0	510	0	510	0	510	510	0	0	0		84736	0	510	0	510	0	510	0	510	0	510	0	510	0	510	0	510	0	510	0	510	510	0	0	0
84847	0	510	0	510	0	510	0	510	0	510	0	510	0	510	0	510	0	510	510	0	0	0		84847	0	510	0	510	0	510	0	510	0	510	0	510	0	510	0	510	0	510	0	510	510	0	0	0
84958	0	510	0	510	0	510	0	510	0	510	0	510	0	510	0	510	0	510	510	0	0	0		84958	0	510	0	510	0	510	0	510	0	510	0	510	0	510	0	510	0	510	0	510	510	0	0	0
85069	0	510	0	510	0	510	0	510	0	510	0	510	0	510	0	510	0	510	510	0	0	0		85069	0	510	0	510	0	510	0	510	0	510	0	510	0	510	0	510	0	510	0	510	510	0	0	0
85179	0	510	0	510	0	510	0	510	0	510	0	510	0	510	0	510	0	510	510	0	0	0		85179	0	510	0	510	0	510	0	510	0	510	0	510	0	510	0	510	0	510	0	510	510	0	0	0
85290	0	510	0	510	0	510	0	510	0	510	0	510	0	510	0	510	0	510	510	0	0	0		85290	0	510	0	510	0	510	0	510	0	510	0	510	0	510	0	510	0	510	0	510	510	0	0	0
85401	0	510	0	510	0	510	0	510	0	510	0	510	0	510	0	510	0	510	510	0	0	0		85401	0	510	0	510	0	510	0	510	0	510	0	510	0	510	0	510	0	510	0	510	510	0	0	0
85512	0	510	0	510	0	510	0	510	0	510	0	510	0	510	0	510	0	510	510	0	0	0		85512	0	510	0	510	0	510	0	510	0	510	0	510	0	510	0	510	0	510	0	510	510	0	0	0
85622	0	510	0	510	0	510	0	510	0	510	0	510	0	510	0	510	0	510	510	0	0	0		85622	0	510	0	510	0	510	0	510	0	510	0	510	0	510	0	510	0	510	0	510	510	0	0	0
85733	0	510	0	510	0	510	0	510	0	510	0	510	0	510	0	510	0	510	510	0	0	0		85733	0	510	0	510	0	510	0	510	0	510	0	510	0	510	0	510	0	510	0	510	510	0	0	0
85844	0	510	0	510	0	510	0	510	0	510	0	510	0	510	0	510	0	510	510	0	0	0		85844	0	510	0	510	0	510	0	510	0	510	0	510	0	510	0	510	0	510	0	510	510	0	0	0
85955	0	510	0	510	0	510	0	510	0	510	0	510	0	510	0	510	0	510	510	0	0	0		85955	0	510	0	510	0	510	0	510	0	510	0	510	0	510	0	510	0	510	0	510	510	0	0	0
86065	0	510	0	510	0	510	0	510	0	510	0	510	0	510	0	510	0	510	510	0	0	0		86065	0	510	0	510	0	510	0	510	0	510	0	510	0	510	0	510	0	510	0	510	510	0	0	0
86176	0	510	0	510	0	510	0	510	0	510	0	510	0	510	0	510	0	510	510	0	0	0		86176	0	510	0	510	0	510	0	510	0	510	0	510	0	510	0	510	0	510	0	510	510	0	0	0
86287	0	510	0	510	0	510	0	510	0	510	0	510	0	510	0	510	0	510	510	0	0	0		86287	0	510	0	510	0	510	0	510	0	510	0	510	0	510	0	510	0	510	0	510	510	0	0	0
86398	0	510	0	510	0	510	0	510	0	510	0	510	0	510	0	510	0	510	510	0	0	0		86398	0	510	0	510	0	510	0	510	0	510	0	510	0	510	0	510	0	510	0	510	510	0	0	0
86509	0	510	0	510	0	510	0	510	0	510	0	510	0	510	0	510	0	510	510	0	0	0		86509	0	510	0	510	0	510	0	510	0	510	0	510	0	510	0	510	0	510	0	510	510	0	0	0
86619	0	510	0	510	0	510	0	510	0	510	0	510	0	510	0	510	0	510	510	0	0	0		86619	0	510	0	510	0	510	0	510	0	510	0	510	0	510	0	510	0	510	0	510	510	0	0	0
86730	0	510	0	510	0	510	0	510	0	510	0	510	0	510	0	510	0	510	510	0	0	0		86730	0	510	0	510	0	510	0	510	0	510	0	510	0	510	0	510	0	510	0	510	510	0	0	0
86841	0	510	0	510	0	510	0	510	0	510	0	510	0	510	0	510	0	510	510	0	0	0		86841	0	510	0	510	0	510	0	510	0	510	0	510	0	510	0	510	0	510	0	510	510	0	0	0
86952	0	510	0	510	0	510	0	510	0	510	0	510	0	510	0	510	0	510	510	0	0	0		86952	0	510	0	510	0	510	0	510	0	510	0	510	0	510	0	510	0	510	0	510	510	0	0	0
87062	0	510	0	510	0	510	0	510	0	510	0	510	0	510	0	510	0	510	510	0	0	0		87062	0	510	0	510	0	510	0	510	0	510	0	510	0	510	0	510	0	510	0	510	510	0	0	0
87173	0	510	0	510	0	510	0	510	0	510	0	510	0	510	0	510	0	510	510	0	0	0		87173	0	510	0	510	0	510	0	510	0	510	0	510	0	510	0	510	0	510	0	510	510	0	0	0
87284	0	510	0	510	0	510	0	510	0	510	0	510	0	510	0	510	0	510	510	0	0	0		87284	0	510	0	510	0	510	0	510	0	510	0	510	0	510	0	510	0	510	0	510	510	0	0	0
87395	0	510	0	510	0	510	0	510	0	510	0	510	0	510	0	510	0	510	510	0	0	0		87395	0	510	0	510	0	510	0	510	0	510	0	510	0	510	0	510	0	510	0	510	510	0	0	0
87505	0	510	0	510	0	510	0	510	0	510	0	510	0	510	0	510	0	510	510	0	0	0		87505	0	510	0	510	0	510	0	510	0	510	0	510	0	510	0	510	0	510	0	510	510	0	0	0
87616	0	510	0	510	0	510	0	510	0	510	0	510	0	510	0	510	0	510	510	0	0	0		87616	0	510	0	510	0	510	0	510	0	510	0	510	0	510	0	510	0	510	0	510	510	0	0	0
87727	0	510	0	510	0	510	0	510	0	510	0	510	0	510	0	510	0	510	510	0	0	0		87727	0	510	0	510	0	510	0	510	0	510	0	510	0	510	0	510	0	510	0	510	510	0	0	0
87838	0	510	0	510	0	510	0	510	0	510	0	510	0	510	0	510	0	510	510	0	0	0		87838	0	510	0	510	0	510	0	510	0	510	0	510	0	510	0	510	0	510	0	510	510	0	0	0
87948	0	510	0	510	0	510	0	510	0	510	0	510	0	510	0	510	0	510	510	0	0	0		87948	0	510	0	510	0	510	0	510	0	510	0	510	0	510	0	510	0	510	0	510	510	0	0	0
88059	0	510	0	510	0	510	0	510	0	510	0	510	0	510	0	510	0	510	510	0	0	0		88059	0	510	0	510	0	510	0	510	0	510	0	510	0	510	0	510	0	510	0	510	510	0	0	0
88170	0	510	0	510	0	510	0	510	0	510	0	510	0	510	0	510	0	510	510	0	0	0		88170	0	510	0	510	0	510	0	510	0	510	0	510	0	510	0	510	0	510	0	510	510	0	0	0
88281	0	510	0	510	0	510	0	510	0	510	0	510	0	510	0	510	0	510	510	0	0	0		88281	0	510	0	510	0	510	0	510	0	510	0	510	0	510	0	510	0	510	0	510	510	0	0	0
88392	0	510	0	510	0	510	0	510	0	510	0	510	0	510	0	510	0	510	510	0	0	0		88392	0	510	0	510	0	510	0	510	0	510	0	510	0	510	0	510	0	510	0	510	510	0	0	0
88502	0	510	0	510	0	510	0	510	0	510	0	510	0	510	0	510	0	510	510	0	0	0		88502	0	510	0	510	0	510	0	510	0	510	0	510	0	510	0	510	0	510	0	510	510	0	0	0
88613	0	510	0	510	0	510	0	510	0	510	0	510	0	510	0	510	0	510	510	0	0	0		88613	0	510	0	510	0	510	0	510	0	510	0	510	0	510	0	510	0	510	0	510	510	0	0	0
88724	0	510	0	510	0	510	0	510	0	510	0	510	0	510	0	510	0	510	510	0	0	0		88724	0	510	0	510	0	510	0	510	0	510	0	510	0	510	0	510	0	510	0	510	510	0	0	0
88835	0	510	0	510	0	510	0	510	0	510	0	510	0	510	0	510	0	510	510	0	0	0		88835	0	510	0	510	0	510	0	510	0	510	0	510	0	510	0	510	0	510	0	510	510	0	0	0
88945	0	510	0	510	0	510	0	510	0	510	0	510	0	510	0	510	0	510	510	0	0	0		88945	0	510	0	510	0	510	0	510	0	510	0	510	0	510	0	510	0	510	0	510	510	0	0	0
89056	0	510	0	510	0	510	0	510	0	510	0	510	0	510	0	510	0	510	510	0	0	0		89056	0	510	0	510	0	510	0	510	0	510	0	510	0	510	0	510	0	510	0	510	510	0	0	0
89167	0	510	0	510	0	510	0	510	0	510	0	510	0	510	0	510	0	510	510	0	0	0		89167	0	510	0	510	0	510	0	510	0	510	0	510	0	510	0	510	0	510	0	510	510	0	0	0
89278	0	510	0	510	0	510	0	510	0	510	0	510	0	510	0	510	0	510	510	0	0	0		89278	0	510	0	510	0	510	0	510	0	510	0	510	0	510	0	510	0	510	0	510	510	0	0	0
89388	0	510	0	510	0	510	0	510	0	510	0	510	0	510	0	510	0	510	510	0	0	0		89388	0	510	0	510	0	510	0	510	0	510	0	510	0	510	0	510	0	510	0	510	510	0	0	0
89499	0	510	0	510	0	510	0	510	0	510	0	510	0	510	0	510	0	510	510	0	0	0		89499	0	510	0	510	0	510	0	510	0	510	0	510	0	510	0	510	0	510	0	510	510	0	0	0
89610	0	510	0	510	0	510	0	510	0	510	0	510	0	510	0	510	0	510	510	0	0	0		89610	0	510	0	510	0	510	0	510	0	510	0	510	0	510	0	510	0	510	0	510	510	0	0	0
89721	0	510	0	510	0	510	0	510	0	510	0	510	0	510	0	510	0	510	510	0	0	0		89721	0	510	0	510	0	510	0	510	0	510	0	510	0	510	0	510	0	510	0	510	510	0	0	0
89832	0	510	0	510	0	510	0	510	0	510	0	510	0	510	0	510	0	510	510	0	0	0		89832	0	510	0	510	0	510	0	510	0	510	0	510	0	510	0	510	0	510	0	510	510	0	0	0
89942	0	510	0	510	0	510	0	510	0	510	0	510	0	510	0	510	0	510	510	0	0	0		89942	0	510	0	510	0	510	0	510	0	510	0	510	0	510	0	510	0	510	0	510	510	0	0	0
90053	0	510	0	510	0	510	0	510	0	510	0	510	0	510	0	510	0	510	510	0	0	0		90053	0	510	0	510	0	510	0	510	0	510	0	510	0	510	0	510	0	510	0	510	510	0	0	0
90164	0	510	0	510	0	510	0	510	0	510	0	510	0	510	0	510	0	510	510	0	0	0		90164	0	510	0	510	0	510	0	510	0	510	0	510	0	510	0	510	0	510	0	510	510	0	0	0
90275	0	510	0	510	0	510	0	510	0	510	0	510	0	510	0	510	0	510	510	0	0	0		90275	0	510	0	510	0	510	0	510	0	510	0	510	0	510	0	510	0	510	0	510	510	0	0	0
90385	0	510	0	510	0	510	0	510	0	510	0	510	0	510	0	510	0	510	510	0	0	0		90385	0	510	0	510	0	510	0	510	0	510	0	510	0	510	0	510	0	510	0	510	510	0	0	0
90496	0	510	0	510	0	510	0	510	0	510	0	510	0	510	0	510	0	510	510	0	0	0		90496	0	510	0	510	0	510	0	510	0	510	0	510	0	510	0	510	0	510	0	510	510	0	0	0
90607	0	510	0	510	0	510	0	510	0	510	0	510	0	510	0	510	0	510	510	0	0	0		90607	0	510	0	510	0	510	0	510	0	510	0	510	0	510	0	510	0	510	0	510	510	0	0	0
90718	0	510	0	510	0	510	0	510	0	510	0	510	0	510	0	510	0	510	510	0	0	0		90718	0	510	0	510	0	510	0	510	0	510	0	510	0	510	0	510	0	510	0	510	510	0	0	0
90828	0	510	0	510	0	510	0	510	0	510	0	510	0	510	0	510	0	510	510	0	0	0		90828	0	510	0	510	0	510	0	510	0	510	0	510	0	510	0	510	0	510	0	510	510	0	0	0
90939	0	510	0	510	0	510	0	510	0	510	0	510	0	510	0	510	0	510	510	0	0	0		90939	0	510	0	510	0	510	0	510	0	510	0	510	0	510	0	510	0	510	0	510	510	0	0	0
91050	0	510	0	510	0	510	0	510	0	510	0	510	0	510	0	510	0	510	510	0	0	0		91050	0	510	0	510	0	510	0	510	0	510	0	510	0	510	0	510	0	510	0	510	510	0	0	0
91161	0	510	0	510	0	510	0	510	0	510	0	510	0	510	0	510	0	510	510	0	0	0		91161	0	510	0	510	0	510	0	510	0	510	0	510	0	510	0	510	0	510	0	510	510	0	0	0
91271	0	510	0	510	0	510	0	510	0	510	0	510	0	510	0	510	0	510	510	0	0	0		91271	0	510	0	510	0	510	0	510	0	510	0	510	0	510	0	510	0	510	0	510	510	0	0	0
91382	0	510	0	510	0	510	0	510	0	510	0	510	0	510	0	510	0	510	510	0	0	0		91382	0	510	0	510	0	510	0	510	0	510	0	510	0	510	0	510	0	510	0	510	510	0	0	0
91493	0	510	0	510	0	510	0	510	0	510	0	510	0	510	0	510	0	510	510	0	0	0		91493	0	510	0	510	0	510	0	510	0	510	0	510	0	510	0	510	0	510	0	510	510	0	0	0
91604	0	510	0	510	0	510	0	510	0	510	0	510	0	510	0	510	0	510	510	0	0	0		91604	0	510	0	510	0	510	0	510	0	510	0	510	0	510	0	510	0	510	0	510	510	0	0	0
91715	0	510	0	510	0	510	0	510	0	510	0	510	0	510	0	510	0	510	510	0	0	0		91715	0	510	0	510	0	510	0	510	0	510	0	510	0	510	0	510	0	510	0	510	510	0	0	0
91825	0	510	0	510	0	510	0	510	0	510	0	510	0	510	0	510	0	510	510	0	0	0		91825	0	510	0	510	0	510	0	510	0	510	0	510	0	510	0	510	0	510	0	510	510	0	0	0
91936	0	510	0	510	0	510	0	510	0	510	0	510	0	510	0	510	0	510	510	0	0	0		91936	0	510	0	510	0	510	0	510	0	510	0	510	0	510	0	510	0	510	0	510	510	0	0	0
92047	0	510	0	510	0	510	0	510	0	510	0	510	0	510	0	510	0	510	510	0	0	0		92047	0	510	0	510	0	510	0	510	0	510	0	510	0	510	0	510	0	510	0	510	510	0	0	0
92158	0	510	0	510	0	510	0	510	0	510	0	510	0	510	0	510	0	510	510	0	0	0		92158	0	510	0	510	0	510	0	510	0	510	0	510	0	510	0	510	0	510	0	510	510	0	0	0
92268	0	510	0	510	0	510	0	510	0	510	0	510	0	510	0	510	0	510	510	0	0	0		92268	0	510	0	510	0	510	0	510	0	510	0	510	0	510	0	510	0	510	0	510	510	0	0	0
92379	0	510	0	510	0	510	0	510	0	510	0	510	0	510	0	510	0	510	510	0	0	0		92379	0	510	0	510	0	510	0	510	0	510	0	510	0	510	0	510	0	510	0	510	510	0	0	0
92490	0	510	0	510	0	510	0	510	0	510	0	510	0	510	0	510	0	510	510	0	0	0		92490	0	510	0	510	0	510	0	510	0	510	0	510	0	510	0	510	0	510	0	510	510	0	0	0
92601	0	510	0	510	0	510	0	510	0	510	0	510	0	510	0	510	0	510	510	0	0	0		92601	0	510	0	510	0	510	0	510	0	510	0	510	0	510	0	510	0	510	0	510	510	0	0	0
92711	0	510	0	510	0	510	0	510	0	510	0	510	0	510	0	510	0	510	510	0	0	0		92711	0	510	0	510	0	510	0	510	0	510	0	510	0	510	0	510	0	510	0	510	510	0	0	0
92822	0	510	0	510	0	510	0	510	0	510	0	510	0	510	0	510	0	510	510	0	0	0		92822	0	510	0	510	0	510	0	510	0	510	0	510	0	510	0	510	0	510	0	510	510	0	0	0
92933	0	510	0	510	0	510	0	510	0	510	0	510	0	510	0	510	0	510	510	0	0	0		92933	0	510	0	510	0	510	0	510	0	510	0	510	0	510	0	510	0	510	0	510	510	0	0	0
93044	0	510	0	510	0	510	0	510	0	510	0	510	0	510	0	510	0	510	510	0	0	0		93044	0	510	0	510	0	510	0	510	0	510	0	510	0	510	0	510	0	510	0	510	510	0	0	0
93155	0	510	0	510	0	510	0	510	0	510	0	510	0	510	0	510	0	510	510	0	0	0		93155	0	510	0	510	0	510	0	510	0	510	0	510	0	510	0	510	0	510	0	510	510	0	0	0
93265	0	510	0	510	0	510	0	510	0	510	0	510	0	510	0	510	0	510	510	0	0	0		93265	0	510	0	510	0	510	0	510	0	510	0	510	0	510	0	510	0	510	0	510	510	0	0	0
93376	0	510	0	510	0	510	0	510	0	510	0	510	0	510	0	510	0	510	510	0	0	0		93376	0	510	0	510	0	510	0	510	0	510	0	510	0	510	0	510	0	510	0	510	510	0	0	0
93487	0	510	0	510	0	510	0	510	0	510	0	510	0	510	0	510	0	510	510	0	0	0		93487	0	510	0	510	0	510	0	510	0	510	0	510	0	510	0	510	0	510	0	510	510	0	0	0
93598	0	510	0	510	0	510	0	510	0	510	0	510	0	510	0	510	0	510	510	0	0	0		93598	0	510	0	510	0	510	0	510	0	510	0	510	0	510	0	510	0	510	0	510	510	0	0	0
93708	0	510	0	510	0	510	0	510	0	510	0	510	0	510	0	510	0	510	510	0	0	0		93708	0	510	0	510	0	510	0	510	0	510	0	510	0	510	0	510	0	510	0	510	510	0	0	0
93819	0	510	0	510	0	510	0	510	0	510	0	510	0	510	0	510	0	510	510	0	0	0		93819	0	510	0	510	0	510	0	510	0	510	0	510	0	510	0	510	0	510	0	510	510	0	0	0
93930	0	510	0	510	0	510	0	510	0	510	0	510	0	510	0	510	0	510	510	0	0	0		93930	0	510	0	510	0	510	0	510	0	510	0	510	0	510	0	510	0	510	0	510	510	0	0	0
94041	0	510	0	510	0	510	0	510	0	510	0	510	0	510	0	510	0	510	510	0	0	0		94041	0	510	0	510	0	510	0	510	0	510	0	510	0	510	0	510	0	510	0	510	510	0	0	0
94151	0	510	0	510	0	510	0	510	0	510	0	510	0	510	0	510	0	510	510	0	0	0		94151	0	510	0	510	0	510	0	510	0	510	0	510	0	510	0	510	0	510	0	510	510	0	0	0
94262	0	510	0	510	0	510	0	510	0	510	0	510	0	510	0	510	0	510	510	0	0	0		94262	0	510	0	510	0	510	0	510	0	510	0	510	0	510	0	510	0	510	0	510	510	0	0	0
94373	0	510	0	510	0	510	0	510	0	510	0	510	0	510	0	510	0	510	510	0	0	0		94373	0	510	0	510	0	510	0	510	0	510	0	510	0	510	0	510	0	510	0	510	510	0	0	0
94484	0	510	0	510	0	510	0	510	0	510	0	510	0	510	0	510	0	510	510	0	0	0		94484	0	510	0	510	0	510	0	510	0	510	0	510	0	510	0	510	0	510	0	510	510	0	0	0
94594	0	510	0	510	0	510	0	510	0	510	0	510	0	510	0	510	0	510	510	0	0	0		94594	0	510	0	510	0	510	0	510	0	510	0	510	0	510	0	510	0	510	0	510	510	0	0	0
94705	0	510	0	510	0	510	0	510	0	510	0	510	0	510	0	510	0	510	510	0	0	0		94705	0	510	0	510	0	510	0	510	0	510	0	510	0	510	0	510	0	510	0	510	510	0	0	0
94816	0	510	0	510	0	510	0	510	0	510	0	510	0	510	0	510	0	510	510	0	0	0		94816	0	510	0	510	0	510	0	510	0	510	0	510	0	510	0	510	0	510	0	510	510	0	0	0
94927	0	510	0	510	0	510	0	510	0	510	0	510	0	510	0	510	0	510	510	0	0	0		94927	0	510	0	510	0	510	0	510	0	510	0	510	0	510	0	510	0	510	0	510	510	0	0	0
95038	0	510	0	510	0	510	0	510	0	510	0	510	0	510	0	510	0	510	510	0	0	0		95038	0	510	0	510	0	510	0	510	0	510	0	510	0	510	0	510	0	510	0	510	510	0	0	0
95148	0	510	0	510	0	510	0	510	0	510	0	510	0	510	0	510	0	510	510	0	0	0		95148	0	510	0	510	0	510	0	510	0	510	0	510	0	510	0	510	0	510	0	510	510	0	0	0
95259	0	510	0	510	0	510	0	510	0	510	0	510	0	510	0	510	0	510	510	0	0	0		95259	0	510	0	510	0	510	0	510	0	510	0	510	0	510	0	510	0	510	0	510	510	0	0	0
95370	0	510	0	510	0	510	0	510	0	510	0	510	0	510	0	510	0	510	510	0	0	0		95370	0	510	0	510	0	510	0	510	0	510	0	510	0	510	0	510	0	510	0	510	510	0	0	0
95481	0	510	0	510	0	510	0	510	0	510	0	510	0	510	0	510	0	510	510	0	0	0		95481	0	510	0	510	0	510	0	510	0	510	0	510	0	510	0	510	0	510	0	510	510	0	0	0
95591	0	510	0	510	0	510	0	510	0	510	0	510	0	510	0	510	0	510	510	0	0	0		95591	0	510	0	510	0	510	0	510	0	510	0	510	0	510	0	510	0	510	0	510	510	0	0	0
95702	0	510	0	510	0	510	0	510	0	510	0	510	0	510	0	510	0	510	510	0	0	0		95702	0	510	0	510	0	510	0	510	0	510	0	510	0	510	0	510	0	510	0	510	510	0	0	0
95813	0	510	0	510	0	510	0	510	0	510	0	510	0	510	0	510	0	510	510	0	0	0		95813	0	510	0	510	0	510	0	510	0	510	0	510	0	510	0	510	0	510	0	510	510	0	0	0
95924	0	510	0	510	0	510	0	510	0	510	0	510	0	510	0	510	0	510	510	0	0	0		95924	0	510	0	510	0	510	0	510	0	510	0	510	0	510	0	510	0	510	0	510	510	0	0	0
96034	0	510	0	510	0	510	0	510	0	510	0	510	0	510	0	510	0	510	510	0	0	0		96034	0	510	0	510	0	510	0	510	0	510	0	510	0	510	0	510	0	510	0	510	510	0	0	0
96145	0	510	0	510	0	510	0	510	0	510	0	510	0	510	0	510	0	510	510	0	0	0		96145	0	510	0	510	0	510	0	510	0	510	0	510	0	510	0	510	0	510	0	510	510	0	0	0
96256	0	510	0	510	0	510	0	510	0	510	0	510	0	510	0	510	0	510	510	0	0	0		96256	0	510	0	510	0	510	0	510	0	510	0	510	0	510	0	510	0	510	0	510	510	0	0	0
96367	0	510	0	510	0	510	0	510	0	510	0	510	0	510	0	510	0	510	510	0	0	0		96367	0	510	0	510	0	510	0	510	0	510	0	510	0	510	0	510	0	510	0	510	510	0	0	0
96477	0	510	0	510	0	510	0	510	0	510	0	510	0	510	0	510	0	510	510	0	0	0		96477	0	510	0	510	0	510	0	510	0	510	0	510	0	510	0	510	0	510	0	510	510	0	0	0
96588	0	510	0	510	0	510	0	510	0	510	0	510	0	510	0	510	0	510	510	0	0	0		96588	0	510	0	510	0	510	0	510	0	510	0	510	0	510	0	510	0	510	0	510	510	0	0	0
96699	0	510	0	510	0	510	0	510	0	510	0	510	0	510	0	510	0	510	510	0	0	0		96699	0	510	0	510	0	510	0	510	0	510	0	510	0	510	0	510	0	510	0	510	510	0	0	0
96810	0	510	0	510	0	510	0	510	0	510	0	510	0	510	0	510	0	510	510	0	0	0		96810	0	510	0	510	0	510	0	510	0	510	0	510	0	510	0	510	0	510	0	510	510	0	0	0
96921	0	510	0	510	0	510	0	510	0	510	0	510	0	510	0	510	0	510	510	0	0	0		96921	0	510	0	510	0	510	0	510	0	510	0	510	0	510	0	510	0	510	0	510	510	0	0	0
97031	0	510	0	510	0	510	0	510	0	510	0	510	0	510	0	510	0	510	510	0	0	0		97031	0	510	0	510	0	510	0	510	0	510	0	510	0	510	0	510	0	510	0	510	510	0	0	0
97142	0	510	0	510	0	510	0	510	0	510	0	510	0	510	0	510	0	510	510	0	0	0		97142	0	510	0	510	0	510	0	510	0	510	0	510	0	510	0	510	0	510	0	510	510	0	0	0
97253	0	510	0	510	0	510	0	510	0	510	0	510	0	510	0	510	0	510	510	0	0	0		97253	0	510	0	510	0	510	0	510	0	510	0	510	0	510	0	510	0	510	0	510	510	0	0	0
97364	0	510	0	510	0	510	0	510	0	510	0	510	0	510	0	510	0	510	510	0	0	0		97364	0	510	0	510	0	510	0	510	0	510	0	510	0	510	0	510	0	510	0	510	510	0	0	0
97474	0	510	0	510	0	510	0	510	0	510	0	510	0	510	0	510	0	510	510	0	0	0		97474	0	510	0	510	0	510	0	510	0	510	0	510	0	510	0	510	0	510	0	510	510	0	0	0
97585	0	510	0	510	0	510	0	510	0	510	0	510	0	510	0	510	0	510	510	0	0	0		97585	0	510	0	510	0	510	0	510	0	510	0	510	0	510	0	510	0	510	0	510	510	0	0	0
97696	0	510	0	510	0	510	0	510	0	510	0	510	0	510	0	510	0	510	510	0	0	0		97696	0	510	0	510	0	510	0	510	0	510	0	510	0	510	0	510	0	510	0	510	510	0	0	0
97807	0	510	0	510	0	510	0	510	0	510	0	510	0	510	0	510	0	510	510	0	0	0		97807	0	510	0	510	0	510	0	510	0	510	0	510	0	510	0	510	0	510	0	510	510	0	0	0
97917	0	510	0	510	0	510	0	510	0	510	0	510	0	510	0	510	0	510	510	0	0	0		97917	0	510	0	510	0	510	0	510	0	510	0	510	0	510	0	510	0	510	0	510	510	0	0	0
98028	0	510	0	510	0	510	0	510	0	510	0	510	0	510	0	510	0	510	510	0	0	0		98028	0	510	0	510	0	510	0	510	0	510	0	510	0	510	0	510	0	510	0	510	510	0	0	0
98139	0	510	0	510	0	510	0	510	0	510	0	510	0	510	0	510	0	510	510	0	0	0		98139	0	510	0	510	0	510	0	510	0	510	0	510	0	510	0	510	0	510	0	510	510	0	0	0
98250	0	510	0	510	0	510	0	510	0	510	0	510	0	510	0	510	0	510	510	0	0	0		98250	0	510	0	510	0	510	0	510	0	510	0	510	0	510	0	510	0	510	0	510	510	0	0	0
98361	0	510	0	510	0	510	0	510	0	510	0	510	0	510	0	510	0	510	510	0	0	0		98361	0	510	0	510	0	510	0	510	0	510	0	510	0	510	0	510	0	510	0	510	510	0	0	0
98471	0	510	0	510	0	510	0	510	0	510	0	510	0	510	0	510	0	510	510	0	0	0		98471	0	510	0	510	0	510	0	510	0	510	0	510	0	510	0	510	0	510	0	510	510	0	0	0
98582	0	510	0	510	0	510	0	510	0	510	0	510	0	510	0	510	0	510	510	0	0	0		98582	0	510	0	510	0	510	0	510	0	510	0	510	0	510	0	510	0	510	0	510	510	0	0	0
98693	0	510	0	510	0	510	0	510	0	510	0	510	0	510	0	510	0	510	510	0	0	0		98693	0	510	0	510	0	510	0	510	0	510	0	510	0	510	0	510	0	510	0	510	510	0	0	0
98804	0	510	0	510	0	510	0	510	0	510	0	510	0	510	0	510	0	510	510	0	0	0		98804	0	510	0	510	0	510	0	510	0	510	0	510	0	510	0	510	0	510	0	510	510	0	0	0
98914	0	510	0	510	0	510	0	510	0	510	0	510	0	510	0	510	0	510	510	0	0	0		98914	0	510	0	510	0	510	0	510	0	510	0	510	0	510	0	510	0	510	0	510	510	0	0	0
99025	0	510	0	510	0	510	0	510	0	510	0	510	0	510	0	510	0	510	510	0	0	0		99025	0	510	0	510	0	510	0	510	0	510	0	510	0	510	0	510	0	510	0	510	510	0	0	0
99136	0	510	0	510	0	510	0	510	0	510	0	510	0	510	0	510	0	510	510	0	0	0		99136	0	510	0	510	0	510	0	510	0	510	0	510	0	510	0	510	0	510	0	510	510	0	0	0
99247	0	510	0	510	0	510	0	510	0	510	0	510	0	510	0	510	0	510	510	0	0	0		99247	0	510	0	510	0	510	0	510	0	510	0	510	0	510	0	510	0	510	0	510	510	0	0	0
99357	0	510	0	510	0	510	0	510	0	510	0	510	0	510	0	510	0	510	510	0	0	0		99357	0	510	0	510	0	510	0	510	0	510	0	510	0	510	0	510	0	510	0	510	510	0	0	0
99468	0	510	0	510	0	510	0	510	0	510	0	510	0	510	0	510	0	510	510	0	0	0		99468	0	510	0	510	0	510	0	510	0	510	0	510	0	510	0	510	0	510	0	510	510	0	0	0
99579	0	510	0	510	0	510	0	510	0	510	0	510	0	510	0	510	0	510	510	0	0	0		99579	0	510	0	510	0	510	0	510	0	510	0	510	0	510	0	510	0	510	0	510	510	0	0	0
99690	0	510	0	510	0	510	0	510	0	510	0	510	0	510	0	510	0	510	510	0	0	0		99690	0	510	0	510	0	510	0	510	0	510	0	510	0	510	0	510	0	510	0	510	510	0	0	0
99800	0	510	0	510	0	510	0	510	0	510	0	510	0	510	0	510	0	510	510	0	0	0		99800	0	510	0	510	0	510	0	510	0	510	0	510	0	510	0	510	0	510	0	510	510	0	0	0
99911	0	510	0	510	0	510	0	510	0	510	0	510	0	510	0	510	0	510	510	0	0	0		99911	0	510	0	510	0	510	0	510	0	510	0	510	0	510	0	510	0	510	0	510	510	0	0	0
100022	0	510	0	510	0	510	0	510	0	510	0	510	0	510	0	510	0	510	510	0	0	0		100022	0	510	0	510	0	510	0	510	0	510	0	510	0	510	0	510	0	510	0	510	510	0	0	0
100133	0	510	0	510	0	510	0	510	0	510	0	510	0	510	0	510	0	510	510	0	0	0		100133	0	510	0	510	0	510	0	510	0	510	0	510	0	510	0	510	0	510	0	510	510	0	0	0
100244	0	510	0	510	0	510	0	510	0	510	0	510	0	510	0	510	0	510	510	0	0	0		100244	0	510	0	510	0	510	0	510	0	510	0	510	0	510	0	510	0	510	0	510	510	0	0	0
100354	0	510	0	510	0	510	0	510	0	510	0	510	0	510	0	510	0	510	510	0	0	0		100354	0	510	0	510	0	510	0	510	0	510	0	510	0	510	0	510	0	510	0	510	510	0	0	0
100465	0	510	0	510	0	510	0	510	0	510	0	510	0	510	0	510	0	510	510	0	0	0		100465	0	510	0	510	0	510	0	510	0	510	0	510	0	510	0	510	0	510	0	510	510	0	0	0
100576	0	510	0	510	0	510	0	510	0	510	0	510	0	510	0	510	0	510	510	0	0	0		100576	0	510	0	510	0	510	0	510	0	510	0	510	0	510	0	510	0	510	0	510	510	0	0	0
100687	0	510	0	510	0	510	0	510	0	510	0	510	0	510	0	510	0	510	510	0	0	0		100687	0	510	0	510	0	510	0	510	0	510	0	510	0	510	0	510	0	510	0	510	510	0	0	0
100797	0	510	0	510	0	510	0	510	0	510	0	510	0	510	0	510	0	510	510	0	0	0		100797	0	510	0	510	0	510	0	510	0	510	0	510	0	510	0	510	0	510	0	510	510	0	0	0
100908	0	510	0	510	0	510	0	510	0	510	0	510	0	510	0	510	0	510	510	0	0	0		100908	0	510	0	510	0	510	0	510	0	510	0	510	0	510	0	510	0	510	0	510	510	0	0	0
101019	0	510	0	510	0	510	0	510	0	510	0	510	0	510	0	510	0	510	510	0	0	0		101019	0	510	0	510	0	510	0	510	0	510	0	510	0	510	0	510	0	510	0	510	510	0	0	0
101130	0	510	0	510	0	510	0	510	0	510	0	510	0	510	0	510	0	510	510	0	0	0		101130	0	510	0	510	0	510	0	510	0	510	0	510	0	510	0	510	0	510	0	510	510	0	0	0
101240	0	510	0	510	0	510	0	510	0	510	0	510	0	510	0	510	0	510	510	0	0	0		101240	0	510	0	510	0	510	0	510	0	510	0	510	0	510	0	510	0	510	0	510	510	0	0	0
101351	0	510	0	510	0	510	0	510	0	510	0	510	0	510	0	510	0	510	510	0	0	0		101351	0	510	0	510	0	510	0	510	0	510	0	510	0	510	0	510	0	510	0	510	510	0	0	0
101462	0	510	0	510	0	510	0	510	0	510	0	510	0	510	0	510	0	510	510	0	0	0		101462	0	510	0	510	0	510	0	510	0	510	0	510	0	510	0	510	0	510	0	510	510	0	0	0
101573	0	510	0	510	0	510	0	510	0	510	0	510	0	510	0	510	0	510	510	0	0	0		101573	0	510	0	510	0	510	0	510	0	510	0	510	0	510	0	510	0	510	0	510	510	0	0	0
101684	0	510	0	510	0	510	0	510	0	510	0	510	0	510	0	510	0	510	510	0	0	0		101684	0	510	0	510	0	510	0	510	0	510	0	510	0	510	0	510	0	510	0	510	510	0	0	0
101794	0	510	0	510	0	510	0	510	0	510	0	510	0	510	0	510	0	510	510	0	0	0		101794	0	510	0	510	0	510	0	510	0	510	0	510	0	510	0	510	0	510	0	510	510	0	0	0
101905	0	510	0	510	0	510	0	510	0	510	0	510	0	510	0	510	0	510	510	0	0	0		101905	0	510	0	510	0	510	0	510	0	510	0	510	0	510	0	510	0	510	0	510	510	0	0	0
102016	0	510	0	510	0	510	0	510	0	510	0	510	0	510	0	510	0	510	510	0	0	0		102016	0	510	0	510	0	510	0	510	0	510	0	510	0	510	0	510	0	510	0	510	510	0	0	0
102127	0	510	0	510	0	510	0	510	0	510	0	510	0	510	0	510	0	510	510	0	0	0		102127	0	510	0	510	0	510	0	510	0	510	0	510	0	510	0	510	0	510	0	510	510	0	0	0
102237	0	510	0	510	0	510	0	510	0	510	0	510	0	510	0	510	0	510	510	0	0	0		102237	0	510	0	510	0	510	0	510	0	510	0	510	0	510	0	510	0	510	0	510	510	0	0	0
102348	0	510	0	510	0	510	0	510	0	510	0	510	0	510	0	510	0	510	510	0	0	0		102348	0	510	0	510	0	510	0	510	0	510	0	510	0	510	0	510	0	510	0	510	510	0	0	0
102459	0	510	0	510	0	510	0	510	0	510	0	510	0	510	0	510	0	510	510	0	0	0		102459	0	510	0	510	0	510	0	510	0	510	0	510	0	510	0	510	0	510	0	510	510	0	0	0
102570	0	510	0	510	0	510	0	510	0	510	0	510	0	510	0	510	0	510	510	0	0	0		102570	0	510	0	510	0	510	0	510	0	510	0	510	0	510	0	510	0	510	0	510	510	0	0	0
102680	0	510	0	510	0	510	0	510	0	510	0	510	0	510	0	510	0	510	510	0	0	0		102680	0	510	0	510	0	510	0	510	0	510	0	510	0	510	0	510	0	510	0	510	510	0	0	0
102791	0	510	0	510	0	510	0	510	0	510	0	510	0	510	0	510	0	510	510	0	0	0		102791	0	510	0	510	0	510	0	510	0	510	0	510	0	510	0	510	0	510	0	510	510	0	0	0
102902	0	510	0	510	0	510	0	510	0	510	0	510	0	510	0	510	0	510	510	0	0	0		102902	0	510	0	510	0	510	0	510	0	510	0	510	0	510	0	510	0	510	0	510	510	0	0	0
103013	0	510	0	510	0	510	0	510	0	510	0	510	0	510	0	510	0	510	510	0	0	0		103013	0	510	0	510	0	510	0	510	0	510	0	510	0	510	0	510	0	510	0	510	510	0	0	0
103123	0	510	0	510	0	510	0	510	0	510	0	510	0	510	0	510	0	510	510	0	0	0		103123	0	510	0	510	0	510	0	510	0	510	0	510	0	510	0	510	0	510	0	510	510	0	0	0
103234	0	510	0	510	0	510	0	510	0	510	0	510	0	510	0	510	0	510	510	0	0	0		103234	0	510	0	510	0	510	0	510	0	510	0	510	0	510	0	510	0	510	0	510	510	0	0	0
103345	0	510	0	510	0	510	0	510	0	510	0	510	0	510	0	510	0	510	510	0	0	0		103345	0	510	0	510	0	510	0	510	0	510	0	510	0	510	0	510	0	510	0	510	510	0	0	0
103456	0	510	0	510	0	510	0	510	0	510	0	510	0	510	0	510	0	510	510	0	0	0		103456	0	510	0	510	0	510	0	510	0	510	0	510	0	510	0	510	0	510	0	510	510	0	0	0
103567	0	510	0	510	0	510	0	510	0	510	0	510	0	510	0	510	0	510	510	0	0	0		103567	0	510	0	510	0	510	0	510	0	510	0	510	0	510	0	510	0	510	0	510	510	0	0	0
103677	0	510	0	510	0	510	0	510	0	510	0	510	0	510	0	510	0	510	510	0	0	0		103677	0	510	0	510	0	510	0	510	0	510	0	510	0	510	0	510	0	510	0	510	510	0	0	0
103788	0	510	0	510	0	510	0	510	0	510	0	510	0	510	0	510	0	510	510	0	0	0		103788	0	510	0	510	0	510	0	510	0	510	0	510	0	510	0	510	0	510	0	510	510	0	0	0
103899	0	510	0	510	0	510	0	510	0	510	0	510	0	510	0	510	0	510	510	0	0	0		103899	0	510	0	510	0	510	0	510	0	510	0	510	0	510	0	510	0	510	0	510	510	0	0	0
104010	0	510	0	510	0	510	0	510	0	510	0	510	0	510	0	510	0	510	510	0	0	0		104010	0	510	0	510	0	510	0	510	0	510	0	510	0	510	0	510	0	510	0	510	510	0	0	0
104120	0	510	0	510	0	510	0	510	0	510	0	510	0	510	0	510	0	510	510	0	0	0		104120	0	510	0	510	0	510	0	510	0	510	0	510	0	510	0	510	0	510	0	510	510	0	0	0
104231	0	510	0	510	0	510	0	510	0	510	0	510	0	510	0	510	0	510	510	0	0	0		104231	0	510	0	510	0	510	0	510	0	510	0	510	0	510	0	510	0	510	0	510	510	0	0	0
104342	0	510	0	510	0	510	0	510	0	510	0	510	0	510	0	510	0	510	510	0	0	0		104342	0	510	0	510	0	510	0	510	0	510	0	510	0	510	0	510	0	510	0	510	510	0	0	0
104453	0	510	0	510	0	510	0	510	0	510	0	510	0	510	0	510	0	510	510	0	0	0		104453	0	510	0	510	0	510	0	510	0	510	0	510	0	510	0	510	0	510	0	510	510	0	0	0
104563	0	510	0	510	0	510	0	510	0	510	0	510	0	510	0	510	0	510	510	0	0	0		104563	0	510	0	510	0	510	0	510	0	510	0	510	0	510	0	510	0	510	0	510	510	0	0	0
104674	0	510	0	510	0	510	0	510	0	510	0	510	0	510	0	510	0	510	510	0	0	0		104674	0	510	0	510	0	510	0	510	0	510	0	510	0	510	0	510	0	510	0	510	510	0	0	0
104785	0	510	0	510	0	510	0	510	0	510	0	510	0	510	0	510	0	510	510	0	0	0		104785	0	510	0	510	0	510	0	510	0	510	0	510	0	510	0	510	0	510	0	510	510	0	0	0
104896	0	510	0	510	0	510	0	510	0	510	0	510	0	510	0	510	0	510	510	0	0	0		104896	0	510	0	510	0	510	0	510	0	510	0	510	0	510	0	510	0	510	0	510	510	0	0	0
105007	0	510	0	510	0	510	0	510	0	510	0	510	0	510	0	510	0	510	510	0	0	0		105007	0	510	0	510	0	510	0	510	0	510	0	510	0	510	0	510	0	510	0	510	510	0	0	0
105117	0	510	0	510	0	510	0	510	0	510	0	510	0	510	0	510	0	510	510	0	0	0		105117	0	510	0	510	0	510	0	510	0	510	0	510	0	510	0	510	0	510	0	510	510	0	0	0
105228	0	510	0	510	0	510	0	510	0	510	0	510	0	510	0	510	0	510	510	0	0	0		105228	0	510	0	510	0	510	0	510	0	510	0	510	0	510	0	510	0	510	0	510	510	0	0	0
105339	0	510	0	510	0	510	0	510	0	510	0	510	0	510	0	510	0	510	510	0	0	0		105339	0	510	0	510	0	510	0	510	0	510	0	510	0	510	0	510	0	510	0	510	510	0	0	0
105450	0	510	0	510	0	510	0	510	0	510	0	510	0	510	0	510	0	510	510	0	0	0		105450	0	510	0	510	0	510	0	510	0	510	0	510	0	510	0	510	0	510	0	510	510	0	0	0
105560	0	510	0	510	0	510	0	510	0	510	0	510	0	510	0	510	0	510	510	0	0	0		105560	0	510	0	510	0	510	0	510	0	510	0	510	0	510	0	510	0	510	0	510	510	0	0	0
105671	0	510	0	510	0	510	0	510	0	510	0	510	0	510	0	510	0	510	510	0	0	0		105671	0	510	0	510	0	510	0	510	0	510	0	510	0	510	0	510	0	510	0	510	510	0	0	0
105782	0	510	0	510	0	510	0	510	0	510	0	510	0	510	0	510	0	510	510	0	0	0		105782	0	510	0	510	0	510	0	510	0	510	0	510	0	510	0	510	0	510	0	510	510	0	0	0
105893	0	510	0	510	0	510	0	510	0	510	0	510	0	510	0	510	0	510	510	0	0	0		105893	0	510	0	510	0	510	0	510	0	510	0	510	0	510	0	510	0	510	0	510	510	0	0	0
106003	0	510	0	510	0	510	0	510	0	510	0	510	0	510	0	510	0	510	510	0	0	0		106003	0	510	0	510	0	510	0	510	0	510	0	510	0	510	0	510	0	510	0	510	510	0	0	0
106114	0	510	0	510	0	510	0	510	0	510	0	510	0	510	0	510	0	510	510	0	0	0		106114	0	510	0	510	0	510	0	510	0	510	0	510	0	510	0	510	0	510	0	510	510	0	0	0
106225	0	510	0	510	0	510	0	510	0	510	0	510	0	510	0	510	0	510	510	0	0	0		106225	0	510	0	510	0	510	0	510	0	510	0	510	0	510	0	510	0	510	0	510	510	0	0	0
106336	0	510	0	510	0	510	0	510	0	510	0	510	0	510	0	510	0	510	510	0	0	0		106336	0	510	0	510	0	510	0	510	0	510	0	510	0	510	0	510	0	510	0	510	510	0	0	0
106446	0	510	0	510	0	510	0	510	0	510	0	510	0	510	0	510	0	510	510	0	0	0		106446	0	510	0	510	0	510	0	510	0	510	0	510	0	510	0	510	0	510	0	510	510	0	0	0
106557	0	510	0	510	0	510	0	510	0	510	0	510	0	510	0	510	0	510	510	0	0	0		106557	0	510	0	510	0	510	0	510	0	510	0	510	0	510	0	510	0	510	0	510	510	0	0	0
106668	0	510	0	510	0	510	0	510	0	510	0	510	0	510	0	510	0	510	510	0	0	0		106668	0	510	0	510	0	510	0	510	0	510	0	510	0	510	0	510	0	510	0	510	510	0	0	0
106779	0	510	0	510	0	510	0	510	0	510	0	510	0	510	0	510	0	510	510	0	0	0		106779	0	510	0	510	0	510	0	510	0	510	0	510	0	510	0	510	0	510	0	510	510	0	0	0
106890	0	510	0	510	0	510	0	510	0	510	0	510	0	510	0	510	0	510	510	0	0	0		106890	0	510	0	510	0	510	0	510	0	510	0	510	0	510	0	510	0	510	0	510	510	0	0	0
107000	0	510	0	510	0	510	0	510	0	510	0	510	0	510	0	510	0	510	510	0	0	0		107000	0	510	0	510	0	510	0	510	0	510	0	510	0	510	0	510	0	510	0	510	510	0	0	0
107111	0	510	0	510	0	510	0	510	0	510	0	510	0	510	0	510	0	510	510	0	0	0		107111	0	510	0	510	0	510	0	510	0	510	0	510	0	510	0	510	0	510	0	510	510	0	0	0
107222	0	510	0	510	0	510	0	510	0	510	0	510	0	510	0	510	0	510	510	0	0	0		107222	0	510	0	510	0	510	0	510	0	510	0	510	0	510	0	510	0	510	0	510	510	0	0	0
107333	0	510	0	510	0	510	0	510	0	510	0	510	0	510	0	510	0	510	510	0	0	0		107333	0	510	0	510	0	510	0	510	0	510	0	510	0	510	0	510	0	510	0	510	510	0	0	0
107443	0	510	0	510	0	510	0	510	0	510	0	510	0	510	0	510	0	510	510	0	0	0		107443	0	510	0	510	0	510	0	510	0	510	0	510	0	510	0	510	0	510	0	510	510	0	0	0
107554	0	510	0	510	0	510	0	510	0	510	0	510	0	510	0	510	0	510	510	0	0	0		107554	0	510	0	510	0	510	0	510	0	510	0	510	0	510	0	510	0	510	0	510	510	0	0	0
107665	0	510	0	510	0	510	0	510	0	510	0	510	0	510	0	510	0	510	510	0	0	0		107665	0	510	0	510	0	510	0	510	0	510	0	510	0	510	0	510	0	510	0	510	510	0	0	0
107776	0	510	0	510	0	510	0	510	0	510	0	510	0	510	0	510	0	510	510	0	0	0		107776	0	510	0	510	0	510	0	510	0	510	0	510	0	510	0	510	0	510	0	510	510	0	0	0
107886	0	510	0	510	0	510	0	510	0	510	0	510	0	510	0	510	0	510	510	0	0	0		107886	0	510	0	510	0	510	0	510	0	510	0	510	0	510	0	510	0	510	0	510	510	0	0	0
107997	0	510	0	510	0	510	0	510	0	510	0	510	0	510	0	510	0	510	510	0	0	0		107997	0	510	0	510	0	510	0	510	0	510	0	510	0	510	0	510	0	510	0	510	510	0	0	0
108108	0	510	0	510	0	510	0	510	0	510	0	510	0	510	0	510	0	510	510	0	0	0		108108	0	510	0	510	0	510	0	510	0	510	0	510	0	510	0	510	0	510	0	510	510	0	0	0
108219	0	510	0	510	0	510	0	510	0	510	0	510	0	510	0	510	0	510	510	0	0	0		108219	0	510	0	510	0	510	0	510	0	510	0	510	0	510	0	510	0	510	0	510	510	0	0	0
108329	0	510	0	510	0	510	0	510	0	510	0	510	0	510	0	510	0	510	510	0	0	0		108329	0	510	0	510	0	510	0	510	0	510	0	510	0	510	0	510	0	510	0	510	510	0	0	0
108440	0	510	0	510	0	510	0	510	0	510	0	510	0	510	0	510	0	510	510	0	0	0		108440	0	510	0	510	0	510	0	510	0	510	0	510	0	510	0	510	0	510	0	510	510	0	0	0
108551	0	510	0	510	0	510	0	510	0	510	0	510	0	510	0	510	0	510	510	0	0	0		108551	0	510	0	510	0	510	0	510	0	510	0	510	0	510	0	510	0	510	0	510	510	0	0	0
108662	0	510	0	510	0	510	0	510	0	510	0	510	0	510	0	510	0	510	510	0	0	0		108662	0	510	0	510	0	510	0	510	0	510	0	510	0	510	0	510	0	510	0	510	510	0	0	0
108773	0	510	0	510	0	510	0	510	0	510	0	510	0	510	0	510	0	510	510	0	0	0		108773	0	510	0	510	0	510	0	510	0	510	0	510	0	510	0	510	0	510	0	510	510	0	0	0
108883	0	510	0	510	0	510	0	510	0	510	0	510	0	510	0	510	0	510	510	0	0	0		108883	0	510	0	510	0	510	0	510	0	510	0	510	0	510	0	510	0	510	0	510	510	0	0	0
108994	0	510	0	510	0	510	0	510	0	510	0	510	0	510	0	510	0	510	510	0	0	0		108994	0	510	0	510	0	510	0	510	0	510	0	510	0	510	0	510	0	510	0	510	510	0	0	0
109105	0	510	0	510	0	510	0	510	0	510	0	510	0	510	0	510	0	510	510	0	0	0		109105	0	510	0	510	0	510	0	510	0	510	0	510	0	510	0	510	0	510	0	510	510	0	0	0
109216	0	510	0	510	0	510	0	510	0	510	0	510	0	510	0	510	0	510	510	0	0	0		109216	0	510	0	510	0	510	0	510	0	510	0	510	0	510	0	510	0	510	0	510	510	0	0	0
109326	0	510	0	510	0	510	0	510	0	510	0	510	0	510	0	510	0	510	510	0	0	0		109326	0	510	0	510	0	510	0	510	0	510	0	510	0	510	0	510	0	510	0	510	510	0	0	0
109437	0	510	0	510	0	510	0	510	0	510	0	510	0	510	0	510	0	510	510	0	0	0		109437	0	510	0	510	0	510	0	510	0	510	0	510	0	510	0	510	0	510	0	510	510	0	0	0
109548	0	510	0	510	0	510	0	510	0	510	0	510	0	510	0	510	0	510	510	0	0	0		109548	0	510	0	510	0	510	0	510	0	510	0	510	0	510	0	510	0	510	0	510	510	0	0	0
109659	0	510	0	510	0	510	0	510	0	510	0	510	0	510	0	510	0	510	510	0	0	0		109659	0	510	0	510	0	510	0	510	0	510	0	510	0	510	0	510	0	510	0	510	510	0	0	0
109769	0	510	0	510	0	510	0	510	0	510	0	510	0	510	0	510	0	510	510	0	0	0		109769	0	510	0	510	0	510	0	510	0	510	0	510	0	510	0	510	0	510	0	510	510	0	0	0
109880	0	510	0	510	0	510	0	510	0	510	0	510	0	510	0	510	0	510	510	0	0	0		109880	0	510	0	510	0	510	0	510	0	510	0	510	0	510	0	510	0	510	0	510	510	0	0	0
109991	0	510	0	510	0	510	0	510	0	510	0	510	0	510	0	510	0	510	510	0	0	0		109991	0	510	0	510	0	510	0	510	0	510	0	510	0	510	0	510	0	510	0	510	510	0	0	0
110102	0	510	0	510	0	510	0	510	0	510	0	510	0	510	0	510	0	510	510	0	0	0		110102	0	510	0	510	0	510	0	510	0	510	0	510	0	510	0	510	0	510	0	510	510	0	0	0
110213	0	510	0	510	0	510	0	510	0	510	0	510	0	510	0	510	0	510	510	0	0	0		110213	0	510	0	510	0	510	0	510	0	510	0	510	0	510	0	510	0	510	0	510	510	0	0	0
110323	0	510	0	510	0	510	0	510	0	510	0	510	0	510	0	510	0	510	510	0	0	0		110323	0	510	0	510	0	510	0	510	0	510	0	510	0	510	0	510	0	510	0	510	510	0	0	0
110434	0	510	0	510	0	510	0	510	0	510	0	510	0	510	0	510	0	510	510	0	0	0		110434	0	510	0	510	0	510	0	510	0	510	0	510	0	510	0	510	0	510	0	510	510	0	0	0
110545	0	510	0	510	0	510	0	510	0	510	0	510	0	510	0	510	0	510	510	0	0	0		110545	0	510	0	510	0	510	0	510	0	510	0	510	0	510	0	510	0	510	0	510	510	0	0	0
110656	0	510	0	510	0	510	0	510	0	510	0	510	0	510	0	510	0	510	510	0	0	0		110656	0	510	0	510	0	510	0	510	0	510	0	510	0	510	0	510	0	510	0	510	510	0	0	0
110766	0	510	0	510	0	510	0	510	0	510	0	510	0	510	0	510	0	510	510	0	0	0		110766	0	510	0	510	0	510	0	510	0	510	0	510	0	510	0	510	0	510	0	510	510	0	0	0
110877	0	510	0	510	0	510	0	510	0	510	0	510	0	510	0	510	0	510	510	0	0	0		110877	0	510	0	510	0	510	0	510	0	510	0	510	0	510	0	510	0	510	0	510	510	0	0	0
110988	0	510	0	510	0	510	0	510	0	510	0	510	0	510	0	510	0	510	510	0	0	0		110988	0	510	0	510	0	510	0	510	0	510	0	510	0	510	0	510	0	510	0	510	510	0	0	0
111099	0	510	0	510	0	510	0	510	0	510	0	510	0	510	0	510	0	510	510	0	0	0		111099	0	510	0	510	0	510	0	510	0	510	0	510	0	510	0	510	0	510	0	510	510	0	0	0
111209	0	510	0	510	0	510	0	510	0	510	0	510	0	510	0	510	0	510	510	0	0	0		111209	0	510	0	510	0	510	0	510	0	510	0	510	0	510	0	510	0	510	0	510	510	0	0	0
111320	0	510	0	510	0	510	0	510	0	510	0	510	0	510	0	510	0	510	510	0	0	0		111320	0	510	0	510	0	510	0	510	0	510	0	510	0	510	0	510	0	510	0	510	510	0	0	0
111431	0	510	0	510	0	510	0	510	0	510	0	510	0	510	0	510	0	510	510	0	0	0		111431	0	510	0	510	0	510	0	510	0	510	0	510	0	510	0	510	0	510	0	510	510	0	0	0
111542	0	510	0	510	0	510	0	510	0	510	0	510	0	510	0	510	0	510	510	0	0	0		111542	0	510	0	510	0	510	0	510	0	510	0	510	0	510	0	510	0	510	0	510	510	0	0	0
111652	0	510	0	510	0	510	0	510	0	510	0	510	0	510	0	510	0	510	510	0	0	0		111652	0	510	0	510	0	510	0	510	0	510	0	510	0	510	0	510	0	510	0	510	510	0	0	0
111763	0	510	0	510	0	510	0	510	0	510	0	510	0	510	0	510	0	510	510	0	0	0		111763	0	510	0	510	0	510	0	510	0	510	0	510	0	510	0	510	0	510	0	510	510	0	0	0
111874	0	510	0	510	0	510	0	510	0	510	0	510	0	510	0	510	0	510	510	0	0	0		111874	0	510	0	510	0	510	0	510	0	510	0	510	0	510	0	510	0	510	0	510	510	0	0	0
111985	0	510	0	510	0	510	0	510	0	510	0	510	0	510	0	510	0	510	510	0	0	0		111985	0	510	0	510	0	510	0	510	0	510	0	510	0	510	0	510	0	510	0	510	510	0	0	0
112096	0	510	0	510	0	510	0	510	0	510	0	510	0	510	0	510	0	510	510	0	0	0		112096	0	510	0	510	0	510	0	510	0	510	0	510	0	510	0	510	0	510	0	510	510	0	0	0
112206	0	510	0	510	0	510	0	510	0	510	0	510	0	510	0	510	0	510	510	0	0	0		112206	0	510	0	510	0	510	0	510	0	510	0	510	0	510	0	510	0	510	0	510	510	0	0	0
112317	0	510	0	510	0	510	0	510	0	510	0	510	0	510	0	510	0	510	510	0	0	0		112317	0	510	0	510	0	510	0	510	0	510	0	510	0	510	0	510	0	510	0	510	510	0	0	0
112428	0	510	0	510	0	510	0	510	0	510	0	510	0	510	0	510	0	510	510	0	0	0		112428	0	510	0	510	0	510	0	510	0	510	0	510	0	510	0	510	0	510	0	510	510	0	0	0
112539	0	510	0	510	0	510	0	510	0	510	0	510	0	510	0	510	0	510	510	0	0	0		112539	0	510	0	510	0	510	0	510	0	510	0	510	0	510	0	510	0	510	0	510	510	0	0	0
112649	0	510	0	510	0	510	0	510	0	510	0	510	0	510	0	510	0	510	510	0	0	0		112649	0	510	0	510	0	510	0	510	0	510	0	510	0	510	0	510	0	510	0	510	510	0	0	0
112760	0	510	0	510	0	510	0	510	0	510	0	510	0	510	0	510	0	510	510	0	0	0		112760	0	510	0	510	0	510	0	510	0	510	0	510	0	510	0	510	0	510	0	510	510	0	0	0
112871	0	510	0	510	0	510	0	510	0	510	0	510	0	510	0	510	0	510	510	0	0	0		112871	0	510	0	510	0	510	0	510	0	510	0	510	0	510	0	510	0	510	0	510	510	0	0	0
112982	0	510	0	510	0	510	0	510	0	510	0	510	0	510	0	510	0	510	510	0	0	0		112982	0	510	0	510	0	510	0	510	0	510	0	510	0	510	0	510	0	510	0	510	510	0	0	0
113092	0	510	0	510	0	510	0	510	0	510	0	510	0	510	0	510	0	510	510	0	0	0		113092	0	510	0	510	0	510	0	510	0	510	0	510	0	510	0	510	0	510	0	510	510	0	0	0
113203	0	510	0	510	0	510	0	510	0	510	0	510	0	510	0	510	0	510	510	0	0	0		113203	0	510	0	510	0	510	0	510	0	510	0	510	0	510	0	510	0	510	0	510	510	0	0	0
113314	0	510	0	510	0	510	0	510	0	510	0	510	0	510	0	510	0	510	510	0	0	0		113314	0	510	0	510	0	510	0	510	0	510	0	510	0	510	0	510	0	510	0	510	510	0	0	0
113425	0	510	0	510	0	510	0	510	0	510	0	510	0	510	0	510	0	510	510	0	0	0		113425	0	510	0	510	0	510	0	510	0	510	0	510	0	510	0	510	0	510	0	510	510	0	0	0
113536	0	510	0	510	0	510	0	510	0	510	0	510	0	510	0	510	0	510	510	0	0	0		113536	0	510	0	510	0	510	0	510	0	510	0	510	0	510	0	510	0	510	0	510	510	0	0	0
113646	0	510	0	510	0	510	0	510	0	510	0	510	0	510	0	510	0	510	510	0	0	0		113646	0	510	0	510	0	510	0	510	0	510	0	510	0	510	0	510	0	510	0	510	510	0	0	0
113757	0	510	0	510	0	510	0	510	0	510	0	510	0	510	0	510	0	510	510	0	0	0		113757	0	510	0	510	0	510	0	510	0	510	0	510	0	510	0	510	0	510	0	510	510	0	0	0
113868	0	510	0	510	0	510	0	510	0	510	0	510	0	510	0	510	0	510	510	0	0	0		113868	0	510	0	510	0	510	0	510	0	510	0	510	0	510	0	510	0	510	0	510	510	0	0	0
113979	0	510	0	510	0	510	0	510	0	510	0	510	0	510	0	510	0	510	510	0	0	0		113979	0	510	0	510	0	510	0	510	0	510	0	510	0	510	0	510	0	510	0	510	510	0	0	0
114089	0	510	0	510	0	510	0	510	0	510	0	510	0	510	0	510	0	510	510	0	0	0		114089	0	510	0	510	0	510	0	510	0	510	0	510	0	510	0	510	0	510	0	510	510	0	0	0
114200	0	510	0	510	0	510	0	510	0	510	0	510	0	510	0	510	0	510	510	0	0	0		114200	0	510	0	510	0	510	0	510	0	510	0	510	0	510	0	510	0	510	0	510	510	0	0	0
114311	0	510	0	510	0	510	0	510	0	510	0	510	0	510	0	510	0	510	510	0	0	0		114311	0	510	0	510	0	510	0	510	0	510	0	510	0	510	0	510	0	510	0	510	510	0	0	0
114422	0	510	0	510	0	510	0	510	0	510	0	510	0	510	0	510	0	510	510	0	0	0		114422	0	510	0	510	0	510	0	510	0	510	0	510	0	510	0	510	0	510	0	510	510	0	0	0
114532	0	510	0	510	0	510	0	510	0	510	0	510	0	510	0	510	0	510	510	0	0	0		114532	0	510	0	510	0	510	0	510	0	510	0	510	0	510	0	510	0	510	0	510	510	0	0	0
114643	0	510	0	510	0	510	0	510	0	510	0	510	0	510	0	510	0	510	510	0	0	0		114643	0	510	0	510	0	510	0	510	0	510	0	510	0	510	0	510	0	510	0	510	510	0	0	0
114754	0	510	0	510	0	510	0	510	0	510	0	510	0	510	0	510	0	510	510	0	0	0		114754	0	510	0	510	0	510	0	510	0	510	0	510	0	510	0	510	0	510	0	510	510	0	0	0
114865	0	510	0	510	0	510	0	510	0	510	0	510	0	510	0	510	0	510	510	0	0	0		114865	0	510	0	510	0	510	0	510	0	510	0	510	0	510	0	510	0	510	0	510	510	0	0	0
114975	0	510	0	510	0	510	0	510	0	510	0	510	0	510	0	510	0	510	510	0	0	0		114975	0	510	0	510	0	510	0	510	0	510	0	510	0	510	0	510	0	510	0	510	510	0	0	0
115086	0	510	0	510	0	510	0	510	0	510	0	510	0	510	0	510	0	510	510	0	0	0		115086	0	510	0	510	0	510	0	510	0	510	0	510	0	510	0	510	0	510	0	510	510	0	0	0
115197	0	510	0	510	0	510	0	510	0	510	0	510	0	510	0	510	0	510	510	0	0	0		115197	0	510	0	510	0	510	0	510	0	510	0	510	0	510	0	510	0	510	0	510	510	0	0	0
115308	0	510	0	510	0	510	0	510	0	510	0	510	0	510	0	510	0	510	510	0	0	0		115308	0	510	0	510	0	510	0	510	0	510	0	510	0	510	0	510	0	510	0	510	510	0	0	0
115419	0	510	0	510	0	510	0	510	0	510	0	510	0	510	0	510	0	510	510	0	0	0		115419	0	510	0	510	0	510	0	510	0	510	0	510	0	510	0	510	0	510	0	510	510	0	0	0
115529	0	510	0	510	0	510	0	510	0	510	0	510	0	510	0	510	0	510	510	0	0	0		115529	0	510	0	510	0	510	0	510	0	510	0	510	0	510	0	510	0	510	0	510	510	0	0	0
115640	0	510	0	510	0	510	0	510	0	510	0	510	0	510	0	510	0	510	510	0	0	0		115640	0	510	0	510	0	510	0	510	0	510	0	510	0	510	0	510	0	510	0	510	510	0	0	0
115751	0	510	0	510	0	510	0	510	0	510	0	510	0	510	0	510	0	510	510	0	0	0		115751	0	510	0	510	0	510	0	510	0	510	0	510	0	510	0	510	0	510	0	510	510	0	0	0
115862	0	510	0	510	0	510	0	510	0	510	0	510	0	510	0	510	0	510	510	0	0	0		115862	0	510	0	510	0	510	0	510	0	510	0	510	0	510	0	510	0	510	0	510	510	0	0	0
115972	0	510	0	510	0	510	0	510	0	510	0	510	0	510	0	510	0	510	510	0	0	0		115972	0	510	0	510	0	510	0	510	0	510	0	510	0	510	0	510	0	510	0	510	510	0	0	0
116083	0	510	0	510	0	510	0	510	0	510	0	510	0	510	0	510	0	510	510	0	0	0		116083	0	510	0	510	0	510	0	510	0	510	0	510	0	510	0	510	0	510	0	510	510	0	0	0
116194	0	510	0	510	0	510	0	510	0	510	0	510	0	510	0	510	0	510	510	0	0	0		116194	0	510	0	510	0	510	0	510	0	510	0	510	0	510	0	510	0	510	0	510	510	0	0	0
116305	0	510	0	510	0	510	0	510	0	510	0	510	0	510	0	510	0	510	510	0	0	0		116305	0	510	0	510	0	510	0	510	0	510	0	510	0	510	0	510	0	510	0	510	510	0	0	0
116415	0	510	0	510	0	510	0	510	0	510	0	510	0	510	0	510	0	510	510	0	0	0		116415	0	510	0	510	0	510	0	510	0	510	0	510	0	510	0	510	0	510	0	510	510	0	0	0
116526	0	510	0	510	0	510	0	510	0	510	0	510	0	510	0	510	0	510	510	0	0	0		116526	0	510	0	510	0	510	0	510	0	510	0	510	0	510	0	510	0	510	0	510	510	0	0	0
116637	0	510	0	510	0	510	0	510	0	510	0	510	0	510	0	510	0	510	510	0	0	0		116637	0	510	0	510	0	510	0	510	0	510	0	510	0	510	0	510	0	510	0	510	510	0	0	0
116748	0	510	0	510	0	510	0	510	0	510	0	510	0	510	0	510	0	510	510	0	0	0		116748	0	510	0	510	0	510	0	510	0	510	0	510	0	510	0	510	0	510	0	510	510	0	0	0
116859	0	510	0	510	0	510	0	510	0	510	0	510	0	510	0	510	0	510	510	0	0	0		116859	0	510	0	510	0	510	0	510	0	510	0	510	0	510	0	510	0	510	0	510	510	0	0	0
116969	0	510	0	510	0	510	0	510	0	510	0	510	0	510	0	510	0	510	510	0	0	0		116969	0	510	0	510	0	510	0	510	0	510	0	510	0	510	0	510	0	510	0	510	510	0	0	0
117080	0	510	0	510	0	510	0	510	0	510	0	510	0	510	0	510	0	510	510	0	0	0		117080	0	510	0	510	0	510	0	510	0	510	0	510	0	510	0	510	0	510	0	510	510	0	0	0
117191	0	510	0	510	0	510	0	510	0	510	0	510	0	510	0	510	0	510	510	0	0	0		117191	0	510	0	510	0	510	0	510	0	510	0	510	0	510	0	510	0	510	0	510	510	0	0	0
117302	0	510	0	510	0	510	0	510	0	510	0	510	0	510	0	510	0	510	510	0	0	0		117302	0	510	0	510	0	510	0	510	0	510	0	510	0	510	0	510	0	510	0	510	510	0	0	0
117412	0	510	0	510	0	510	0	510	0	510	0	510	0	510	0	510	0	510	510	0	0	0		117412	0	510	0	510	0	510	0	510	0	510	0	510	0	510	0	510	0	510	0	510	510	0	0	0
117523	0	510	0	510	0	510	0	510	0	510	0	510	0	510	0	510	0	510	510	0	0	0		117523	0	510	0	510	0	510	0	510	0	510	0	510	0	510	0	510	0	510	0	510	510	0	0	0
117634	0	510	0	510	0	510	0	510	0	510	0	510	0	510	0	510	0	510	510	0	0	0		117634	0	510	0	510	0	510	0	510	0	510	0	510	0	510	0	510	0	510	0	510	510	0	0	0
117745	0	510	0	510	0	510	0	510	0	510	0	510	0	510	0	510	0	510	510	0	0	0		117745	0	510	0	510	0	510	0	510	0	510	0	510	0	510	0	510	0	510	0	510	510	0	0	0
117855	0	510	0	510	0	510	0	510	0	510	0	510	0	510	0	510	0	510	510	0	0	0		117855	0	510	0	510	0	510	0	510	0	510	0	510	0	510	0	510	0	510	0	510	510	0	0	0
117966	0	510	0	510	0	510	0	510	0	510	0	510	0	510	0	510	0	510	510	0	0	0		117966	0	510	0	510	0	510	0	510	0	510	0	510	0	510	0	510	0	510	0	510	510	0	0	0
118077	0	510	0	510	0	510	0	510	0	510	0	510	0	510	0	510	0	510	510	0	0	0		118077	0	510	0	510	0	510	0	510	0	510	0	510	0	510	0	510	0	510	0	510	510	0	0	0
118188	0	510	0	510	0	510	0	510	0	510	0	510	0	510	0	510	0	510	510	0	0	0		118188	0	510	0	510	0	510	0	510	0	510	0	510	0	510	0	510	0	510	0	510	510	0	0	0
118298	0	510	0	510	0	510	0	510	0	510	0	510	0	510	0	510	0	510	510	0	0	0		118298	0	510	0	510	0	510	0	510	0	510	0	510	0	510	0	510	0	510	0	510	510	0	0	0
118409	0	510	0	510	0	510	0	510	0	510	0	510	0	510	0	510	0	510	510	0	0	0		118409	0	510	0	510	0	510	0	510	0	510	0	510	0	510	0	510	0	510	0	510	510	0	0	0
118520	0	510	0	510	0	510	0	510	0	510	0	510	0	510	0	510	0	510	510	0	0	0		118520	0	510	0	510	0	510	0	510	0	510	0	510	0	510	0	510	0	510	0	510	510	0	0	0
118631	0	510	0	510	0	510	0	510	0	510	0	510	0	510	0	510	0	510	510	0	0	0		118631	0	510	0	510	0	510	0	510	0	510	0	510	0	510	0	510	0	510	0	510	510	0	0	0
118742	0	510	0	510	0	510	0	510	0	510	0	510	0	510	0	510	0	510	510	0	0	0		118742	0	510	0	510	0	510	0	510	0	510	0	510	0	510	0	510	0	510	0	510	510	0	0	0
118852	0	510	0	510	0	510	0	510	0	510	0	510	0	510	0	510	0	510	510	0	0	0		118852	0	510	0	510	0	510	0	510	0	510	0	510	0	510	0	510	0	510	0	510	510	0	0	0
118963	0	510	0	510	0	510	0	510	0	510	0	510	0	510	0	510	0	510	510	0	0	0		118963	0	510	0	510	0	510	0	510	0	510	0	510	0	510	0	510	0	510	0	510	510	0	0	0
119074	0	510	0	510	0	510	0	510	0	510	0	510	0	510	0	510	0	510	510	0	0	0		119074	0	510	0	510	0	510	0	510	0	510	0	510	0	510	0	510	0	510	0	510	510	0	0	0
119185	0	510	0	510	0	510	0	510	0	510	0	510	0	510	0	510	0	510	510	0	0	0		119185	0	510	0	510	0	510	0	510	0	510	0	510	0	510	0	510	0	510	0	510	510	0	0	0
119295	0	510	0	510	0	510	0	510	0	510	0	510	0	510	0	510	0	510	510	0	0	0		119295	0	510	0	510	0	510	0	510	0	510	0	510	0	510	0	510	0	510	0	510	510	0	0	0
119406	0	510	0	510	0	510	0	510	0	510	0	510	0	510	0	510	0	510	510	0	0	0		119406	0	510	0	510	0	510	0	510	0	510	0	510	0	510	0	510	0	510	0	510	510	0	0	0
119517	0	510	0	510	0	510	0	510	0	510	0	510	0	510	0	510	0	510	510	0	0	0		119517	0	510	0	510	0	510	0	510	0	510	0	510	0	510	0	510	0	510	0	510	510	0	0	0
119628	0	510	0	510	0	510	0	510	0	510	0	510	0	510	0	510	0	510	510	0	0	0		119628	0	510	0	510	0	510	0	510	0	510	0	510	0	510	0	510	0	510	0	510	510	0	0	0
119738	0	510	0	510	0	510	0	510	0	510	0	510	0	510	0	510	0	510	510	0	0	0		119738	0	510	0	510	0	510	0	510	0	510	0	510	0	510	0	510	0	510	0	510	510	0	0	0
119849	0	510	0	510	0	510	0	510	0	510	0	510	0	510	0	510	0	510	510	0	0	0		119849	0	510	0	510	0	510	0	510	0	510	0	510	0	510	0	510	0	510	0	510	510	0	0	0
119960	0	510	0	510	0	510	0	510	0	510	0	510	0	510	0	510	0	510	510	0	0	0		119960	0	510	0	510	0	510	0	510	0	510	0	510	0	510	0	510	0	510	0	510	510	0	0	0
120071	0	510	0	510	0	510	0	510	0	510	0	510	0	510	0	510	0	510	510	0	0	0		120071	0	510	0	510	0	510	0	510	0	510	0	510	0	510	0	510	0	510	0	510	510	0	0	0
120181	0	510	0	510	0	510	0	510	0	510	0	510	0	510	0	510	0	510	510	0	0	0		120181	0	510	0	510	0	510	0	510	0	510	0	510	0	510	0	510	0	510	0	510	510	0	0	0
120292	0	510	0	510	0	510	0	510	0	510	0	510	0	510	0	510	0	510	510	0	0	0		120292	0	510	0	510	0	510	0	510	0	510	0	510	0	510	0	510	0	510	0	510	510	0	0	0
120403	0	510	0	510	0	510	0	510	0	510	0	510	0	510	0	510	0	510	510	0	0	0		120403	0	510	0	510	0	510	0	510	0	510	0	510	0	510	0	510	0	510	0	510	510	0	0	0
120514	0	510	0	510	0	510	0	510	0	510	0	510	0	510	0	510	0	510	510	0	0	0		120514	0	510	0	510	0	510	0	510	0	510	0	510	0	510	0	510	0	510	0	510	510	0	0	0
120625	0	510	0	510	0	510	0	510	0	510	0	510	0	510	0	510	0	510	510	0	0	0		120625	0	510	0	510	0	510	0	510	0	510	0	510	0	510	0	510	0	510	0	510	510	0	0	0
120735	0	510	0	510	0	510	0	510	0	510	0	510	0	510	0	510	0	510	510	0	0	0		120735	0	510	0	510	0	510	0	510	0	510	0	510	0	510	0	510	0	510	0	510	510	0	0	0
120846	0	510	0	510	0	510	0	510	0	510	0	510	0	510	0	510	0	510	510	0	0	0		120846	0	510	0	510	0	510	0	510	0	510	0	510	0	510	0	510	0	510	0	510	510	0	0	0
120957	0	510	0	510	0	510	0	510	0	510	0	510	0	510	0	510	0	510	510	0	0	0		120957	0	510	0	510	0	510	0	510	0	510	0	510	0	510	0	510	0	510	0	510	510	0	0	0
121068	0	510	0	510	0	510	0	510	0	510	0	510	0	510	0	510	0	510	510	0	0	0		121068	0	510	0	510	0	510	0	510	0	510	0	510	0	510	0	510	0	510	0	510	510	0	0	0
121178	0	510	0	510	0	510	0	510	0	510	0	510	0	510	0	510	0	510	510	0	0	0		121178	0	510	0	510	0	510	0	510	0	510	0	510	0	510	0	510	0	510	0	510	510	0	0	0
121289	0	510	0	510	0	510	0	510	0	510	0	510	0	510	0	510	0	510	510	0	0	0		121289	0	510	0	510	0	510	0	510	0	510	0	510	0	510	0	510	0	510	0	510	510	0	0	0
121400	0	510	0	510	0	510	0	510	0	510	0	510	0	510	0	510	0	510	510	0	0	0		121400	0	510	0	510	0	510	0	510	0	510	0	510	0	510	0	510	0	510	0	510	510	0	0	0
121511	0	510	0	510	0	510	0	510	0	510	0	510	0	510	0	510	0	510	510	0	0	0		121511	0	510	0	510	0	510	0	510	0	510	0	510	0	510	0	510	0	510	0	510	510	0	0	0
121621	0	510	0	510	0	510	0	510	0	510	0	510	0	510	0	510	0	510	510	0	0	0		121621	0	510	0	510	0	510	0	510	0	510	0	510	0	510	0	510	0	510	0	510	510	0	0	0
121732	0	510	0	510	0	510	0	510	0	510	0	510	0	510	0	510	0	510	510	0	0	0		121732	0	510	0	510	0	510	0	510	0	510	0	510	0	510	0	510	0	510	0	510	510	0	0	0
121843	0	510	0	510	0	510	0	510	0	510	0	510	0	510	0	510	0	510	510	0	0	0		121843	0	510	0	510	0	510	0	510	0	510	0	510	0	510	0	510	0	510	0	510	510	0	0	0
121954	0	510	0	510	0	510	0	510	0	510	0	510	0	510	0	510	0	510	510	0	0	0		121954	0	510	0	510	0	510	0	510	0	510	0	510	0	510	0	510	0	510	0	510	510	0	0	0
122065	0	510	0	510	0	510	0	510	0	510	0	510	0	510	0	510	0	510	510	0	0	0		122065	0	510	0	510	0	510	0	510	0	510	0	510	0	510	0	510	0	510	0	510	510	0	0	0
122175	0	510	0	510	0	510	0	510	0	510	0	510	0	510	0	510	0	510	510	0	0	0		122175	0	510	0	510	0	510	0	510	0	510	0	510	0	510	0	510	0	510	0	510	510	0	0	0
122286	0	510	0	510	0	510	0	510	0	510	0	510	0	510	0	510	0	510	510	0	0	0		122286	0	510	0	510	0	510	0	510	0	510	0	510	0	510	0	510	0	510	0	510	510	0	0	0
122397	0	510	0	510	0	510	0	510	0	510	0	510	0	510	0	510	0	510	510	0	0	0		122397	0	510	0	510	0	510	0	510	0	510	0	510	0	510	0	510	0	510	0	510	510	0	0	0
122508	0	510	0	510	0	510	0	510	0	510	0	510	0	510	0	510	0	510	510	0	0	0		122508	0	510	0	510	0	510	0	510	0	510	0	510	0	510	0	510	0	510	0	510	510	0	0	0
122618	0	510	0	510	0	510	0	510	0	510	0	510	0	510	0	510	0	510	510	0	0	0		122618	0	510	0	510	0	510	0	510	0	510	0	510	0	510	0	510	0	510	0	510	510	0	0	0
122729	0	510	0	510	0	510	0	510	0	510	0	510	0	510	0	510	0	510	510	0	0	0		122729	0	510	0	510	0	510	0	510	0	510	0	510	0	510	0	510	0	510	0	510	510	0	0	0
122840	0	510	0	510	0	510	0	510	0	510	0	510	0	510	0	510	0	510	510	0	0	0		122840	0	510	0	510	0	510	0	510	0	510	0	510	0	510	0	510	0	510	0	510	510	0	0	0
122951	0	510	0	510	0	510	0	510	0	510	0	510	0	510	0	510	0	510	510	0	0	0		122951	0	510	0	510	0	510	0	510	0	510	0	510	0	510	0	510	0	510	0	510	510	0	0	0
123061	0	510	0	510	0	510	0	510	0	510	0	510	0	510	0	510	0	510	510	0	0	0		123061	0	510	0	510	0	510	0	510	0	510	0	510	0	510	0	510	0	510	0	510	510	0	0	0
123172	0	510	0	510	0	510	0	510	0	510	0	510	0	510	0	510	0	510	510	0	0	0		123172	0	510	0	510	0	510	0	510	0	510	0	510	0	510	0	510	0	510	0	510	510	0	0	0
123283	0	510	0	510	0	510	0	510	0	510	0	510	0	510	0	510	0	510	510	0	0	0		123283	0	510	0	510	0	510	0	510	0	510	0	510	0	510	0	510	0	510	0	510	510	0	0	0
123394	0	510	0	510	0	510	0	510	0	510	0	510	0	510	0	510	0	510	510	0	0	0		123394	0	510	0	510	0	510	0	510	0	510	0	510	0	510	0	510	0	510	0	510	510	0	0	0
123504	0	510	0	510	0	510	0	510	0	510	0	510	0	510	0	510	0	510	510	0	0	0		123504	0	510	0	510	0	510	0	510	0	510	0	510	0	510	0	510	0	510	0	510	510	0	0	0
123615	0	510	0	510	0	510	0	510	0	510	0	510	0	510	0	510	0	510	510	0	0	0		123615	0	510	0	510	0	510	0	510	0	510	0	510	0	510	0	510	0	510	0	510	510	0	0	0
123726	0	510	0	510	0	510	0	510	0	510	0	510	0	510	0	510	0	510	510	0	0	0		123726	0	510	0	510	0	510	0	510	0	510	0	510	0	510	0	510	0	510	0	510	510	0	0	0
123837	0	510	0	510	0	510	0	510	0	510	0	510	0	510	0	510	0	510	510	0	0	0		123837	0	510	0	510	0	510	0	510	0	510	0	510	0	510	0	510	0	510	0	510	510	0	0	0
123948	0	510	0	510	0	510	0	510	0	510	0	510	0	510	0	510	0	510	510	0	0	0		123948	0	510	0	510	0	510	0	510	0	510	0	510	0	510	0	510	0	510	0	510	510	0	0	0
124058	0	510	0	510	0	510	0	510	0	510	0	510	0	510	0	510	0	510	510	0	0	0		124058	0	510	0	510	0	510	0	510	0	510	0	510	0	510	0	510	0	510	0	510	510	0	0	0
124169	0	510	0	510	0	510	0	510	0	510	0	510	0	510	0	510	0	510	510	0	0	0		124169	0	510	0	510	0	510	0	510	0	510	0	510	0	510	0	510	0	510	0	510	510	0	0	0
124280	0	510	0	510	0	510	0	510	0	510	0	510	0	510	0	510	0	510	510	0	0	0		124280	0	510	0	510	0	510	0	510	0	510	0	510	0	510	0	510	0	510	0	510	510	0	0	0
124391	0	510	0	510	0	510	0	510	0	510	0	510	0	510	0	510	0	510	510	0	0	0		124391	0	510	0	510	0	510	0	510	0	510	0	510	0	510	0	510	0	510	0	510	510	0	0	0
124501	0	510	0	510	0	510	0	510	0	510	0	510	0	510	0	510	0	510	510	0	0	0		124501	0	510	0	510	0	510	0	510	0	510	0	510	0	510	0	510	0	510	0	510	510	0	0	0
124612	0	510	0	510	0	510	0	510	0	510	0	510	0	510	0	510	0	510	510	0	0	0		124612	0	510	0	510	0	510	0	510	0	510	0	510	0	510	0	510	0	510	0	510	510	0	0	0
124723	0	510	0	510	0	510	0	510	0	510	0	510	0	510	0	510	0	510	510	0	0	0		124723	0	510	0	510	0	510	0	510	0	510	0	510	0	510	0	510	0	510	0	510	510	0	0	0
124834	0	510	0	510	0	510	0	510	0	510	0	510	0	510	0	510	0	510	510	0	0	0		124834	0	510	0	510	0	510	0	510	0	510	0	510	0	510	0	510	0	510	0	510	510	0	0	0
124944	0	510	0	510	0	510	0	510	0	510	0	510	0	510	0	510	0	510	510	0	0	0		124944	0	510	0	510	0	510	0	510	0	510	0	510	0	510	0	510	0	510	0	510	510	0	0	0
125055	0	510	0	510	0	510	0	510	0	510	0	510	0	510	0	510	0	510	510	0	0	0		125055	0	510	0	510	0	510	0	510	0	510	0	510	0	510	0	510	0	510	0	510	510	0	0	0
125166	0	510	0	510	0	510	0	510	0	510	0	510	0	510	0	510	0	510	510	0	0	0		125166	0	510	0	510	0	510	0	510	0	510	0	510	0	510	0	510	0	510	0	510	510	0	0	0
125277	0	510	0	510	0	510	0	510	0	510	0	510	0	510	0	510	0	510	510	0	0	0		125277	0	510	0	510	0	510	0	510	0	510	0	510	0	510	0	510	0	510	0	510	510	0	0	0
125388	0	510	0	510	0	510	0	510	0	510	0	510	0	510	0	510	0	510	510	0	0	0		125388	0	510	0	510	0	510	0	510	0	510	0	510	0	510	0	510	0	510	0	510	510	0	0	0
125498	0	510	0	510	0	510	0	510	0	510	0	510	0	510	0	510	0	510	510	0	0	0		125498	0	510	0	510	0	510	0	510	0	510	0	510	0	510	0	510	0	510	0	510	510	0	0	0
125609	0	510	0	510	0	510	0	510	0	510	0	510	0	510	0	510	0	510	510	0	0	0		125609	0	510	0	510	0	510	0	510	0	510	0	510	0	510	0	510	0	510	0	510	510	0	0	0
125720	0	510	0	510	0	510	0	510	0	510	0	510	0	510	0	510	0	510	510	0	0	0		125720	0	510	0	510	0	510	0	510	0	510	0	510	0	510	0	510	0	510	0	510	510	0	0	0
125831	0	510	0	510	0	510	0	510	0	510	0	510	0	510	0	510	0	510	510	0	0	0		125831	0	510	0	510	0	510	0	510	0	510	0	510	0	510	0	510	0	510	0	510	510	0	0	0
125941	0	510	0	510	0	510	0	510	0	510	0	510	0	510	0	510	0	510	510	0	0	0		125941	0	510	0	510	0	510	0	510	0	510	0	510	0	510	0	510	0	510	0	510	510	0	0	0
126052	0	510	0	510	0	510	0	510	0	510	0	510	0	510	0	510	0	510	510	0	0	0		126052	0	510	0	510	0	510	0	510	0	510	0	510	0	510	0	510	0	510	0	510	510	0	0	0
126163	0	510	0	510	0	510	0	510	0	510	0	510	0	510	0	510	0	510	510	0	0	0		126163	0	510	0	510	0	510	0	510	0	510	0	510	0	510	0	510	0	510	0	510	510	0	0	0
126274	0	510	0	510	0	510	0	510	0	510	0	510	0	510	0	510	0	510	510	0	0	0		126274	0	510	0	510	0	510	0	510	0	510	0	510	0	510	0	510	0	510	0	510	510	0	0	0
126384	0	510	0	510	0	510	0	510	0	510	0	510	0	510	0	510	0	510	510	0	0	0		126384	0	510	0	510	0	510	0	510	0	510	0	510	0	510	0	510	0	510	0	510	510	0	0	0
126495	0	510	0	510	0	510	0	510	0	510	0	510	0	510	0	510	0	510	510	0	0	0		126495	0	510	0	510	0	510	0	510	0	510	0	510	0	510	0	510	0	510	0	510	510	0	0	0
126606	0	510	0	510	0	510	0	510	0	510	0	510	0	510	0	510	0	510	510	0	0	0		126606	0	510	0	510	0	510	0	510	0	510	0	510	0	510	0	510	0	510	0	510	510	0	0	0
126717	0	510	0	510	0	510	0	510	0	510	0	510	0	510	0	510	0	510	510	0	0	0		126717	0	510	0	510	0	510	0	510	0	510	0	510	0	510	0	510	0	510	0	510	510	0	0	0
126827	0	510	0	510	0	510	0	510	0	510	0	510	0	510	0	510	0	510	510	0	0	0		126827	0	510	0	510	0	510	0	510	0	510	0	510	0	510	0	510	0	510	0	510	510	0	0	0
126938	0	510	0	510	0	510	0	510	0	510	0	510	0	510	0	510	0	510	510	0	0	0		126938	0	510	0	510	0	510	0	510	0	510	0	510	0	510	0	510	0	510	0	510	510	0	0	0
127049	0	510	0	510	0	510	0	510	0	510	0	510	0	510	0	510	0	510	510	0	0	0		127049	0	510	0	510	0	510	0	510	0	510	0	510	0	510	0	510	0	510	0	510	510	0	0	0
127160	0	510	0	510	0	510	0	510	0	510	0	510	0	510	0	510	0	510	510	0	0	0		127160	0	510	0	510	0	510	0	510	0	510	0	510	0	510	0	510	0	510	0	510	510	0	0	0
127271	0	510	0	510	0	510	0	510	0	510	0	510	0	510	0	510	0	510	510	0	0	0		127271	0	510	0	510	0	510	0	510	0	510	0	510	0	510	0	510	0	510	0	510	510	0	0	0
127381	0	510	0	510	0	510	0	510	0	510	0	510	0	510	0	510	0	510	510	0	0	0		127381	0	510	0	510	0	510	0	510	0	510	0	510	0	510	0	510	0	510	0	510	510	0	0	0
127492	0	510	0	510	0	510	0	510	0	510	0	510	0	510	0	510	0	510	510	0	0	0		127492	0	510	0	510	0	510	0	510	0	510	0	510	0	510	0	510	0	510	0	510	510	0	0	0
127603	0	510	0	510	0	510	0	510	0	510	0	510	0	510	0	510	0	510	510	0	0	0		127603	0	510	0	510	0	510	0	510	0	510	0	510	0	510	0	510	0	510	0	510	510	0	0	0
127714	0	510	0	510	0	510	0	510	0	510	0	510	0	510	0	510	0	510	510	0	0	0		127714	0	510	0	510	0	510	0	510	0	510	0	510	0	510	0	510	0	510	0	510	510	0	0	0
127824	0	510	0	510	0	510	0	510	0	510	0	510	0	510	0	510	0	510	510	0	0	0		127824	0	510	0	510	0	510	0	510	0	510	0	510	0	510	0	510	0	510	0	510	510	0	0	0
127935	0	510	0	510	0	510	0	510	0	510	0	510	0	510	0	510	0	510	510	0	0	0		127935	0	510	0	510	0	510	0	510	0	510	0	510	0	510	0	510	0	510	0	510	510	0	0	0
128046	0	510	0	510	0	510	0	510	0	510	0	510	0	510	0	510	0	510	510	0	0	0		128046	0	510	0	510	0	510	0	510	0	510	0	510	0	510	0	510	0	510	0	510	510	0	0	0
128157	0	510	0	510	0	510	0	510	0	510	0	510	0	510	0	510	0	510	510	0	0	0		128157	0	510	0	510	0	510	0	510	0	510	0	510	0	510	0	510	0	510	0	510	510	0	0	0
128267	0	510	0	510	0	510	0	510	0	510	0	510	0	510	0	510	0	510	510	0	0	0		128267	0	510	0	510	0	510	0	510	0	510	0	510	0	510	0	510	0	510	0	510	510	0	0	0
128378	0	510	0	510	0	510	0	510	0	510	0	510	0	510	0	510	0	510	510	0	0	0		128378	0	510	0	510	0	510	0	510	0	510	0	510	0	510	0	510	0	510	0	510	510	0	0	0
128489	0	510	0	510	0	510	0	510	0	510	0	510	0	510	0	510	0	510	510	0	0	0		128489	0	510	0	510	0	510	0	510	0	510	0	510	0	510	0	510	0	510	0	510	510	0	0	0
128600	0	510	0	510	0	510	0	510	0	510	0	510	0	510	0	510	0	510	510	0	0	0		128600	0	510	0	510	0	510	0	510	0	510	0	510	0	510	0	510	0	510	0	510	510	0	0	0
128711	0	510	0	510	0	510	0	510	0	510	0	510	0	510	0	510	0	510	510	0	0	0		128711	0	510	0	510	0	510	0	510	0	510	0	510	0	510	0	510	0	510	0	510	510	0	0	0
128821	0	510	0	510	0	510	0	510	0	510	0	510	0	510	0	510	0	510	510	0	0	0		128821	0	510	0	510	0	510	0	510	0	510	0	510	0	510	0	510	0	510	0	510	510	0	0	0
128932	0	510	0	510	0	510	0	510	0	510	0	510	0	510	0	510	0	510	510	0	0	0		128932	0	510	0	510	0	510	0	510	0	510	0	510	0	510	0	510	0	510	0	510	510	0	0	0
129043	0	510	0	510	0	510	0	510	0	510	0	510	0	510	0	510	0	510	510	0	0	0		129043	0	510	0	510	0	510	0	510	0	510	0	510	0	510	0	510	0	510	0	510	510	0	0	0
129154	0	510	0	510	0	510	0	510	0	510	0	510	0	510	0	510	0	510	510	0	0	0		129154	0	510	0	510	0	510	0	510	0	510	0	510	0	510	0	510	0	510	0	510	510	0	0	0
129264	0	510	0	510	0	510	0	510	0	510	0	510	0	510	0	510	0	510	510	0	0	0		129264	0	510	0	510	0	510	0	510	0	510	0	510	0	510	0	510	0	510	0	510	510	0	0	0
129375	0	510	0	510	0	510	0	510	0	510	0	510	0	510	0	510	0	510	510	0	0	0		129375	0	510	0	510	0	510	0	510	0	510	0	510	0	510	0	510	0	510	0	510	510	0	0	0
129486	0	510	0	510	0	510	0	510	0	510	0	510	0	510	0	510	0	510	510	0	0	0		129486	0	510	0	510	0	510	0	510	0	510	0	510	0	510	0	510	0	510	0	510	510	0	0	0
129597	0	510	0	510	0	510	0	510	0	510	0	510	0	510	0	510	0	510	510	0	0	0		129597	0	510	0	510	0	510	0	510	0	510	0	510	0	510	0	510	0	510	0	510	510	0	0	0
129707	0	510	0	510	0	510	0	510	0	510	0	510	0	510	0	510	0	510	510	0	0	0		129707	0	510	0	510	0	510	0	510	0	510	0	510	0	510	0	510	0	510	0	510	510	0	0	0
129818	0	510	0	510	0	510	0	510	0	510	0	510	0	510	0	510	0	510	510	0	0	0		129818	0	510	0	510	0	510	0	510	0	510	0	510	0	510	0	510	0	510	0	510	510	0	0	0
129929	0	510	0	510	0	510	0	510	0	510	0	510	0	510	0	510	0	510	510	0	0	0		129929	0	510	0	510	0	510	0	510	0	510	0	510	0	510	0	510	0	510	0	510	510	0	0	0
130040	0	510	0	510	0	510	0	510	0	510	0	510	0	510	0	510	0	510	510	0	0	0		130040	0	510	0	510	0	510	0	510	0	510	0	510	0	510	0	510	0	510	0	510	510	0	0	0
130150	0	510	0	510	0	510	0	510	0	510	0	510	0	510	0	510	0	510	510	0	0	0		130150	0	510	0	510	0	510	0	510	0	510	0	510	0	510	0	510	0	510	0	510	510	0	0	0
130261	0	510	0	510	0	510	0	510	0	510	0	510	0	510	0	510	0	510	510	0	0	0		130261	0	510	0	510	0	510	0	510	0	510	0	510	0	510	0	510	0	510	0	510	510	0	0	0
130372	0	510	0	510	0	510	0	510	0	510	0	510	0	510	0	510	0	510	510	0	0	0		130372	0	510	0	510	0	510	0	510	0	510	0	510	0	510	0	510	0	510	0	510	510	0	0	0
130483	0	510	0	510	0	510	0	510	0	510	0	510	0	510	0	510	0	510	510	0	0	0		130483	0	510	0	510	0	510	0	510	0	510	0	510	0	510	0	510	0	510	0	510	510	0	0	0
130594	0	510	0	510	0	510	0	510	0	510	0	510	0	510	0	510	0	510	510	0	0	0		130594	0	510	0	510	0	510	0	510	0	510	0	510	0	510	0	510	0	510	0	510	510	0	0	0
130704	0	510	0	510	0	510	0	510	0	510	0	510	0	510	0	510	0	510	510	0	0	0		130704	0	510	0	510	0	510	0	510	0	510	0	510	0	510	0	510	0	510	0	510	510	0	0	0
130815	0	510	0	510	0	510	0	510	0	510	0	510	0	510	0	510	0	510	510	0	0	0		130815	0	510	0	510	0	510	0	510	0	510	0	510	0	510	0	510	0	510	0	510	510	0	0	0
130926	0	510	0	510	0	510	0	510	0	510	0	510	0	510	0	510	0	510	510	0	0	0		130926	0	510	0	510	0	510	0	510	0	510	0	510	0	510	0	510	0	510	0	510	510	0	0	0
131037	0	510	0	510	0	510	0	510	0	510	0	510	0	510	0	510	0	510	510	0	0	0		131037	0	510	0	510	0	510	0	510	0	510	0	510	0	510	0	510	0	510	0	510	510	0	0	0
131147	0	510	0	510	0	510	0	510	0	510	0	510	0	510	0	510	0	510	510	0	0	0		131147	0	510	0	510	0	510	0	510	0	510	0	510	0	510	0	510	0	510	0	510	510	0	0	0
131258	0	510	0	510	0	510	0	510	0	510	0	510	0	510	0	510	0	510	510	0	0	0		131258	0	510	0	510	0	510	0	510	0	510	0	510	0	510	0	510	0	510	0	510	510	0	0	0
131369	0	510	0	510	0	510	0	510	0	510	0	510	0	510	0	510	0	510	510	0	0	0		131369	0	510	0	510	0	510	0	510	0	510	0	510	0	510	0	510	0	510	0	510	510	0	0	0
131480	0	510	0	510	0	510	0	510	0	510	0	510	0	510	0	510	0	510	510	0	0	0		131480	0	510	0	510	0	510	0	510	0	510	0	510	0	510	0	510	0	510	0	510	510	0	0	0
131590	0	510	0	510	0	510	0	510	0	510	0	510	0	510	0	510	0	510	510	0	0	0		131590	0	510	0	510	0	510	0	510	0	510	0	510	0	510	0	510	0	510	0	510	510	0	0	0
131701	0	510	0	510	0	510	0	510	0	510	0	510	0	510	0	510	0	510	510	0	0	0		131701	0	510	0	510	0	510	0	510	0	510	0	510	0	510	0	510	0	510	0	510	510	0	0	0
131812	0	510	0	510	0	510	0	510	0	510	0	510	0	510	0	510	0	510	510	0	0	0		131812	0	510	0	510	0	510	0	510	0	510	0	510	0	510	0	510	0	510	0	510	510	0	0	0
131923	0	510	0	510	0	510	0	510	0	510	0	510	0	510	0	510	0	510	510	0	0	0		131923	0	510	0	510	0	510	0	510	0	510	0	510	0	510	0	510	0	510	0	510	510	0	0	0
132033	0	510	0	510	0	510	0	510	0	510	0	510	0	510	0	510	0	510	510	0	0	0		132033	0	510	0	510	0	510	0	510	0	510	0	510	0	510	0	510	0	510	0	510	510	0	0	0
132144	0	510	0	510	0	510	0	510	0	510	0	510	0	510	0	510	0	510	510	0	0	0		132144	0	510	0	510	0	510	0	510	0	510	0	510	0	510	0	510	0	510	0	510	510	0	0	0
132255	0	510	0	510	0	510	0	510	0	510	0	510	0	510	0	510	0	510	510	0	0	0		132255	0	510	0	510	0	510	0	510	0	510	0	510	0	510	0	510	0	510	0	510	510	0	0	0
132366	0	510	0	510	0	510	0	510	0	510	0	510	0	510	0	510	0	510	510	0	0	0		132366	0	510	0	510	0	510	0	510	0	510	0	510	0	510	0	510	0	510	0	510	510	0	0	0
132477	0	510	0	510	0	510	0	510	0	510	0	510	0	510	0	510	0	510	510	0	0	0		132477	0	510	0	510	0	510	0	510	0	510	0	510	0	510	0	510	0	510	0	510	510	0	0	0
132587	0	510	0	510	0	510	0	510	0	510	0	510	0	510	0	510	0	510	510	0	0	0		132587	0	510	0	510	0	510	0	510	0	510	0	510	0	510	0	510	0	510	0	510	510	0	0	0
132698	0	510	0	510	0	510	0	510	0	510	0	510	0	510	0	510	0	510	510	0	0	0		132698	0	510	0	510	0	510	0	510	0	510	0	510	0	510	0	510	0	510	0	510	510	0	0	0
132809	0	510	0	510	0	510	0	510	0	510	0	510	0	510	0	510	0	510	510	0	0	0		132809	0	510	0	510	0	510	0	510	0	510	0	510	0	510	0	510	0	510	0	510	510	0	0	0
132920	0	510	0	510	0	510	0	510	0	510	0	510	0	510	0	510	0	510	510	0	0	0		132920	0	510	0	510	0	510	0	510	0	510	0	510	0	510	0	510	0	510	0	510	510	0	0	0
133030	0	510	0	510	0	510	0	510	0	510	0	510	0	510	0	510	0	510	510	0	0	0		133030	0	510	0	510	0	510	0	510	0	510	0	510	0	510	0	510	0	510	0	510	510	0	0	0
133141	0	510	0	510	0	510	0	510	0	510	0	510	0	510	0	510	0	510	510	0	0	0		133141	0	510	0	510	0	510	0	510	0	510	0	510	0	510	0	510	0	510	0	510	510	0	0	0
133252	0	510	0	510	0	510	0	510	0	510	0	510	0	510	0	510	0	510	510	0	0	0		133252	0	510	0	510	0	510	0	510	0	510	0	510	0	510	0	510	0	510	0	510	510	0	0	0
133363	0	510	0	510	0	510	0	510	0	510	0	510	0	510	0	510	0	510	510	0	0	0		133363	0	510	0	510	0	510	0	510	0	510	0	510	0	510	0	510	0	510	0	510	510	0	0	0
133473	0	510	0	510	0	510	0	510	0	510	0	510	0	510	0	510	0	510	510	0	0	0		133473	0	510	0	510	0	510	0	510	0	510	0	510	0	510	0	510	0	510	0	510	510	0	0	0
133584	0	510	0	510	0	510	0	510	0	510	0	510	0	510	0	510	0	510	510	0	0	0		133584	0	510	0	510	0	510	0	510	0	510	0	510	0	510	0	510	0	510	0	510	510	0	0	0
133695	0	510	0	510	0	510	0	510	0	510	0	510	0	510	0	510	0	510	510	0	0	0		133695	0	510	0	510	0	510	0	510	0	510	0	510	0	510	0	510	0	510	0	510	510	0	0	0
133806	0	510	0	510	0	510	0	510	0	510	0	510	0	510	0	510	0	510	510	0	0	0		133806	0	510	0	510	0	510	0	510	0	510	0	510	0	510	0	510	0	510	0	510	510	0	0	0
133917	0	510	0	510	0	510	0	510	0	510	0	510	0	510	0	510	0	510	510	0	0	0		133917	0	510	0	510	0	510	0	510	0	510	0	510	0	510	0	510	0	510	0	510	510	0	0	0
134027	0	510	0	510	0	510	0	510	0	510	0	510	0	510	0	510	0	510	510	0	0	0		134027	0	510	0	510	0	510	0	510	0	510	0	510	0	510	0	510	0	510	0	510	510	0	0	0
134138	0	510	0	510	0	510	0	510	0	510	0	510	0	510	0	510	0	510	510	0	0	0		134138	0	510	0	510	0	510	0	510	0	510	0	510	0	510	0	510	0	510	0	510	510	0	0	0
134249	0	510	0	510	0	510	0	510	0	510	0	510	0	510	0	510	0	510	510	0	0	0		134249	0	510	0	510	0	510	0	510	0	510	0	510	0	510	0	510	0	510	0	510	510	0	0	0
134360	0	510	0	510	0	510	0	510	0	510	0	510	0	510	0	510	0	510	510	0	0	0		134360	0	510	0	510	0	510	0	510	0	510	0	510	0	510	0	510	0	510	0	510	510	0	0	0
134470	0	510	0	510	0	510	0	510	0	510	0	510	0	510	0	510	0	510	510	0	0	0		134470	0	510	0	510	0	510	0	510	0	510	0	510	0	510	0	510	0	510	0	510	510	0	0	0
134581	0	510	0	510	0	510	0	510	0	510	0	510	0	510	0	510	0	510	510	0	0	0		134581	0	510	0	510	0	510	0	510	0	510	0	510	0	510	0	510	0	510	0	510	510	0	0	0
134692	0	510	0	510	0	510	0	510	0	510	0	510	0	510	0	510	0	510	510	0	0	0		134692	0	510	0	510	0	510	0	510	0	510	0	510	0	510	0	510	0	510	0	510	510	0	0	0
134803	0	510	0	510	0	510	0	510	0	510	0	510	0	510	0	510	0	510	510	0	0	0		134803	0	510	0	510	0	510	0	510	0	510	0	510	0	510	0	510	0	510	0	510	510	0	0	0
134913	0	510	0	510	0	510	0	510	0	510	0	510	0	510	0	510	0	510	510	0	0	0		134913	0	510	0	510	0	510	0	510	0	510	0	510	0	510	0	510	0	510	0	510	510	0	0	0
135024	0	510	0	510	0	510	0	510	0	510	0	510	0	510	0	510	0	510	510	0	0	0		135024	0	510	0	510	0	510	0	510	0	510	0	510	0	510	0	510	0	510	0	510	510	0	0	0
135135	0	510	0	510	0	510	0	510	0	510	0	510	0	510	0	510	0	510	510	0	0	0		135135	0	510	0	510	0	510	0	510	0	510	0	510	0	510	0	510	0	510	0	510	510	0	0	0
135246	0	510	0	510	0	510	0	510	0	510	0	510	0	510	0	510	0	510	510	0	0	0		135246	0	510	0	510	0	510	0	510	0	510	0	510	0	510	0	510	0	510	0	510	510	0	0	0
135356	0	510	0	510	0	510	0	510	0	510	0	510	0	510	0	510	0	510	510	0	0	0		135356	0	510	0	510	0	510	0	510	0	510	0	510	0	510	0	510	0	510	0	510	510	0	0	0
135467	0	510	0	510	0	510	0	510	0	510	0	510	0	510	0	510	0	510	510	0	0	0		135467	0	510	0	510	0	510	0	510	0	510	0	510	0	510	0	510	0	510	0	510	510	0	0	0
135578	0	510	0	510	0	510	0	510	0	510	0	510	0	510	0	510	0	510	510	0	0	0		135578	0	510	0	510	0	510	0	510	0	510	0	510	0	510	0	510	0	510	0	510	510	0	0	0
135689	0	510	0	510	0	510	0	510	0	510	0	510	0	510	0	510	0	510	510	0	0	0		135689	0	510	0	510	0	510	0	510	0	510	0	510	0	510	0	510	0	510	0	510	510	0	0	0
135800	0	510	0	510	0	510	0	510	0	510	0	510	0	510	0	510	0	510	510	0	0	0		135800	0	510	0	510	0	510	0	510	0	510	0	510	0	510	0	510	0	510	0	510	510	0	0	0
135910	0	510	0	510	0	510	0	510	0	510	0	510	0	510	0	510	0	510	510	0	0	0		135910	0	510	0	510	0	510	0	510	0	510	0	510	0	510	0	510	0	510	0	510	510	0	0	0
136021	0	510	0	510	0	510	0	510	0	510	0	510	0	510	0	510	0	510	510	0	0	0		136021	0	510	0	510	0	510	0	510	0	510	0	510	0	510	0	510	0	510	0	510	510	0	0	0
136132	0	510	0	510	0	510	0	510	0	510	0	510	0	510	0	510	0	510	510	0	0	0		136132	0	510	0	510	0	510	0	510	0	510	0	510	0	510	0	510	0	510	0	510	510	0	0	0
136243	0	510	0	510	0	510	0	510	0	510	0	510	0	510	0	510	0	510	510	0	0	0		136243	0	510	0	510	0	510	0	510	0	510	0	510	0	510	0	510	0	510	0	510	510	0	0	0
136353	0	510	0	510	0	510	0	510	0	510	0	510	0	510	0	510	0	510	510	0	0	0		136353	0	510	0	510	0	510	0	510	0	510	0	510	0	510	0	510	0	510	0	510	510	0	0	0
136464	0	510	0	510	0	510	0	510	0	510	0	510	0	510	0	510	0	510	510	0	0	0		136464	0	510	0	510	0	510	0	510	0	510	0	510	0	510	0	510	0	510	0	510	510	0	0	0
136575	0	510	0	510	0	510	0	510	0	510	0	510	0	510	0	510	0	510	510	0	0	0		136575	0	510	0	510	0	510	0	510	0	510	0	510	0	510	0	510	0	510	0	510	510	0	0	0
136686	0	510	0	510	0	510	0	510	0	510	0	510	0	510	0	510	0	510	510	0	0	0		136686	0	510	0	510	0	510	0	510	0	510	0	510	0	510	0	510	0	510	0	510	510	0	0	0
136796	0	510	0	510	0	510	0	510	0	510	0	510	0	510	0	510	0	510	510	0	0	0		136796	0	510	0	510	0	510	0	510	0	510	0	510	0	510	0	510	0	510	0	510	510	0	0	0
136907	0	510	0	510	0	510	0	510	0	510	0	510	0	510	0	510	0	510	510	0	0	0		136907	0	510	0	510	0	510	0	510	0	510	0	510	0	510	0	510	0	510	0	510	510	0	0	0
137018	0	510	0	510	0	510	0	510	0	510	0	510	0	510	0	510	0	510	510	0	0	0		137018	0	510	0	510	0	510	0	510	0	510	0	510	0	510	0	510	0	510	0	510	510	0	0	0
137129	0	510	0	510	0	510	0	510	0	510	0	510	0	510	0	510	0	510	510	0	0	0		137129	0	510	0	510	0	510	0	510	0	510	0	510	0	510	0	510	0	510	0	510	510	0	0	0
137240	0	510	0	510	0	510	0	510	0	510	0	510	0	510	0	510	0	510	510	0	0	0		137240	0	510	0	510	0	510	0	510	0	510	0	510	0	510	0	510	0	510	0	510	510	0	0	0
137350	0	510	0	510	0	510	0	510	0	510	0	510	0	510	0	510	0	510	510	0	0	0		137350	0	510	0	510	0	510	0	510	0	510	0	510	0	510	0	510	0	510	0	510	510	0	0	0
137461	0	510	0	510	0	510	0	510	0	510	0	510	0	510	0	510	0	510	510	0	0	0		137461	0	510	0	510	0	510	0	510	0	510	0	510	0	510	0	510	0	510	0	510	510	0	0	0
137572	0	510	0	510	0	510	0	510	0	510	0	510	0	510	0	510	0	510	510	0	0	0		137572	0	510	0	510	0	510	0	510	0	510	0	510	0	510	0	510	0	510	0	510	510	0	0	0
137683	0	510	0	510	0	510	0	510	0	510	0	510	0	510	0	510	0	510	510	0	0	0		137683	0	510	0	510	0	510	0	510	0	510	0	510	0	510	0	510	0	510	0	510	510	0	0	0
137793	0	510	0	510	0	510	0	510	0	510	0	510	0	510	0	510	0	510	510	0	0	0		137793	0	510	0	510	0	510	0	510	0	510	0	510	0	510	0	510	0	510	0	510	510	0	0	0
137904	0	510	0	510	0	510	0	510	0	510	0	510	0	510	0	510	0	510	510	0	0	0		137904	0	510	0	510	0	510	0	510	0	510	0	510	0	510	0	510	0	510	0	510	510	0	0	0
138015	0	510	0	510	0	510	0	510	0	510	0	510	0	510	0	510	0	510	510	0	0	0		138015	0	510	0	510	0	510	0	510	0	510	0	510	0	510	0	510	0	510	0	510	510	0	0	0
138126	0	510	0	510	0	510	0	510	0	510	0	510	0	510	0	510	0	510	510	0	0	0		138126	0	510	0	510	0	510	0	510	0	510	0	510	0	510	0	510	0	510	0	510	510	0	0	0
138236	0	510	0	510	0	510	0	510	0	510	0	510	0	510	0	510	0	510	510	0	0	0		138236	0	510	0	510	0	510	0	510	0	510	0	510	0	510	0	510	0	510	0	510	510	0	0	0
138347	0	510	0	510	0	510	0	510	0	510	0	510	0	510	0	510	0	510	510	0	0	0		138347	0	510	0	510	0	510	0	510	0	510	0	510	0	510	0	510	0	510	0	510	510	0	0	0
138458	0	510	0	510	0	510	0	510	0	510	0	510	0	510	0	510	0	510	510	0	0	0		138458	0	510	0	510	0	510	0	510	0	510	0	510	0	510	0	510	0	510	0	510	510	0	0	0
138569	0	510	0	510	0	510	0	510	0	510	0	510	0	510	0	510	0	510	510	0	0	0		138569	0	510	0	510	0	510	0	510	0	510	0	510	0	510	0	510	0	510	0	510	510	0	0	0
138679	0	510	0	510	0	510	0	510	0	510	0	510	0	510	0	510	0	510	510	0	0	0		138679	0	510	0	510	0	510	0	510	0	510	0	510	0	510	0	510	0	510	0	510	510	0	0	0
138790	0	510	0	510	0	510	0	510	0	510	0	510	0	510	0	510	0	510	510	0	0	0		138790	0	510	0	510	0	510	0	510	0	510	0	510	0	510	0	510	0	510	0	510	510	0	0	0
138901	0	510	0	510	0	510	0	510	0	510	0	510	0	510	0	510	0	510	510	0	0	0		138901	0	510	0	510	0	510	0	510	0	510	0	510	0	510	0	510	0	510	0	510	510	0	0	0
139012	0	510	0	510	0	510	0	510	0	510	0	510	0	510	0	510	0	510	510	0	0	0		139012	0	510	0	510	0	510	0	510	0	510	0	510	0	510	0	510	0	510	0	510	510	0	0	0
139123	0	510	0	510	0	510	0	510	0	510	0	510	0	510	0	510	0	510	510	0	0	0		139123	0	510	0	510	0	510	0	510	0	510	0	510	0	510	0	510	0	510	0	510	510	0	0	0
139233	0	510	0	510	0	510	0	510	0	510	0	510	0	510	0	510	0	510	510	0	0	0		139233	0	510	0	510	0	510	0	510	0	510	0	510	0	510	0	510	0	510	0	510	510	0	0	0
139344	0	510	0	510	0	510	0	510	0	510	0	510	0	510	0	510	0	510	510	0	0	0		139344	0	510	0	510	0	510	0	510	0	510	0	510	0	510	0	510	0	510	0	510	510	0	0	0
139455	0	510	0	510	0	510	0	510	0	510	0	510	0	510	0	510	0	510	510	0	0	0		139455	0	510	0	510	0	510	0	510	0	510	0	510	0	510	0	510	0	510	0	510	510	0	0	0
139566	0	510	0	510	0	510	0	510	0	510	0	510	0	510	0	510	0	510	510	0	0	0		139566	0	510	0	510	0	510	0	510	0	510	0	510	0	510	0	510	0	510	0	510	510	0	0	0
139676	0	510	0	510	0	510	0	510	0	510	0	510	0	510	0	510	0	510	510	0	0	0		139676	0	510	0	510	0	510	0	510	0	510	0	510	0	510	0	510	0	510	0	510	510	0	0	0
139787	0	510	0	510	0	510	0	510	0	510	0	510	0	510	0	510	0	510	510	0	0	0		139787	0	510	0	510	0	510	0	510	0	510	0	510	0	510	0	510	0	510	0	510	510	0	0	0
139898	0	510	0	510	0	510	0	510	0	510	0	510	0	510	0	510	0	510	510	0	0	0		139898	0	510	0	510	0	510	0	510	0	510	0	510	0	510	0	510	0	510	0	510	510	0	0	0
140009	0	510	0	510	0	510	0	510	0	510	0	510	0	510	0	510	0	510	510	0	0	0		140009	0	510	0	510	0	510	0	510	0	510	0	510	0	510	0	510	0	510	0	510	510	0	0	0
140119	0	510	0	510	0	510	0	510	0	510	0	510	0	510	0	510	0	510	510	0	0	0		140119	0	510	0	510	0	510	0	510	0	510	0	510	0	510	0	510	0	510	0	510	510	0	0	0
140230	0	510	0	510	0	510	0	510	0	510	0	510	0	510	0	510	0	510	510	0	0	0		140230	0	510	0	510	0	510	0	510	0	510	0	510	0	510	0	510	0	510	0	510	510	0	0	0
140341	0	510	0	510	0	510	0	510	0	510	0	510	0	510	0	510	0	510	510	0	0	0		140341	0	510	0	510	0	510	0	510	0	510	0	510	0	510	0	510	0	510	0	510	510	0	0	0
140452	0	510	0	510	0	510	0	510	0	510	0	510	0	510	0	510	0	510	510	0	0	0		140452	0	510	0	510	0	510	0	510	0	510	0	510	0	510	0	510	0	510	0	510	510	0	0	0
140563	0	510	0	510	0	510	0	510	0	510	0	510	0	510	0	510	0	510	510	0	0	0		140563	0	510	0	510	0	510	0	510	0	510	0	510	0	510	0	510	0	510	0	510	510	0	0	0
140673	0	510	0	510	0	510	0	510	0	510	0	510	0	510	0	510	0	510	510	0	0	0		140673	0	510	0	510	0	510	0	510	0	510	0	510	0	510	0	510	0	510	0	510	510	0	0	0
140784	0	510	0	510	0	510	0	510	0	510	0	510	0	510	0	510	0	510	510	0	0	0		140784	0	510	0	510	0	510	0	510	0	510	0	510	0	510	0	510	0	510	0	510	510	0	0	0
140895	0	510	0	510	0	510	0	510	0	510	0	510	0	510	0	510	0	510	510	0	0	0		140895	0	510	0	510	0	510	0	510	0	510	0	510	0	510	0	510	0	510	0	510	510	0	0	0
141006	0	510	0	510	0	510	0	510	0	510	0	510	0	510	0	510	0	510	510	0	0	0		141006	0	510	0	510	0	510	0	510	0	510	0	510	0	510	0	510	0	510	0	510	510	0	0	0
141116	0	510	0	510	0	510	0	510	0	510	0	510	0	510	0	510	0	510	510	0	0	0		141116	0	510	0	510	0	510	0	510	0	510	0	510	0	510	0	510	0	510	0	510	510	0	0	0
141227	0	510	0	510	0	510	0	510	0	510	0	510	0	510	0	510	0	510	510	0	0	0		141227	0	510	0	510	0	510	0	510	0	510	0	510	0	510	0	510	0	510	0	510	510	0	0	0
141338	0	510	0	510	0	510	0	510	0	510	0	510	0	510	0	510	0	510	510	0	0	0		141338	0	510	0	510	0	510	0	510	0	510	0	510	0	510	0	510	0	510	0	510	510	0	0	0
141449	0	510	0	510	0	510	0	510	0	510	0	510	0	510	0	510	0	510	510	0	0	0		141449	0	510	0	510	0	510	0	510	0	510	0	510	0	510	0	510	0	510	0	510	510	0	0	0
141559	0	510	0	510	0	510	0	510	0	510	0	510	0	510	0	510	0	510	510	0	0	0		141559	0	510	0	510	0	510	0	510	0	510	0	510	0	510	0	510	0	510	0	510	510	0	0	0
141670	0	510	0	510	0	510	0	510	0	510	0	510	0	510	0	510	0	510	510	0	0	0		141670	0	510	0	510	0	510	0	510	0	510	0	510	0	510	0	510	0	510	0	510	510	0	0	0
141781	0	510	0	510	0	510	0	510	0	510	0	510	0	510	0	510	0	510	510	0	0	0		141781	0	510	0	510	0	510	0	510	0	510	0	510	0	510	0	510	0	510	0	510	510	0	0	0
141892	0	510	0	510	0	510	0	510	0	510	0	510	0	510	0	510	0	510	510	0	0	0		141892	0	510	0	510	0	510	0	510	0	510	0	510	0	510	0	510	0	510	0	510	510	0	0	0
142002	0	510	0	510	0	510	0	510	0	510	0	510	0	510	0	510	0	510	510	0	0	0		142002	0	510	0	510	0	510	0	510	0	510	0	510	0	510	0	510	0	510	0	510	510	0	0	0
142113	0	510	0	510	0	510	0	510	0	510	0	510	0	510	0	510	0	510	510	0	0	0		142113	0	510	0	510	0	510	0	510	0	510	0	510	0	510	0	510	0	510	0	510	510	0	0	0
142224	0	510	0	510	0	510	0	510	0	510	0	510	0	510	0	510	0	510	510	0	0	0		142224	0	510	0	510	0	510	0	510	0	510	0	510	0	510	0	510	0	510	0	510	510	0	0	0
142335	0	510	0	510	0	510	0	510	0	510	0	510	0	510	0	510	0	510	510	0	0	0		142335	0	510	0	510	0	510	0	510	0	510	0	510	0	510	0	510	0	510	0	510	510	0	0	0
142446	0	510	0	510	0	510	0	510	0	510	0	510	0	510	0	510	0	510	510	0	0	0		142446	0	510	0	510	0	510	0	510	0	510	0	510	0	510	0	510	0	510	0	510	510	0	0	0
142556	0	510	0	510	0	510	0	510	0	510	0	510	0	510	0	510	0	510	510	0	0	0		142556	0	510	0	510	0	510	0	510	0	510	0	510	0	510	0	510	0	510	0	510	510	0	0	0
142667	0	510	0	510	0	510	0	510	0	510	0	510	0	510	0	510	0	510	510	0	0	0		142667	0	510	0	510	0	510	0	510	0	510	0	510	0	510	0	510	0	510	0	510	510	0	0	0
142778	0	510	0	510	0	510	0	510	0	510	0	510	0	510	0	510	0	510	510	0	0	0		142778	0	510	0	510	0	510	0	510	0	510	0	510	0	510	0	510	0	510	0	510	510	0	0	0
142889	0	510	0	510	0	510	0	510	0	510	0	510	0	510	0	510	0	510	510	0	0	0		142889	0	510	0	510	0	510	0	510	0	510	0	510	0	510	0	510	0	510	0	510	510	0	0	0
142999	0	510	0	510	0	510	0	510	0	510	0	510	0	510	0	510	0	510	510	0	0	0		142999	0	510	0	510	0	510	0	510	0	510	0	510	0	510	0	510	0	510	0	510	510	0	0	0
143110	0	510	0	510	0	510	0	510	0	510	0	510	0	510	0	510	0	510	510	0	0	0		143110	0	510	0	510	0	510	0	510	0	510	0	510	0	510	0	510	0	510	0	510	510	0	0	0
143221	0	510	0	510	0	510	0	510	0	510	0	510	0	510	0	510	0	510	510	0	0	0		143221	0	510	0	510	0	510	0	510	0	510	0	510	0	510	0	510	0	510	0	510	510	0	0	0
143332	0	510	0	510	0	510	0	510	0	510	0	510	0	510	0	510	0	510	510	0	0	0		143332	0	510	0	510	0	510	0	510	0	510	0	510	0	510	0	510	0	510	0	510	510	0	0	0
143442	0	510	0	510	0	510	0	510	0	510	0	510	0	510	0	510	0	510	510	0	0	0		143442	0	510	0	510	0	510	0	510	0	510	0	510	0	510	0	510	0	510	0	510	510	0	0	0
143553	0	510	0	510	0	510	0	510	0	510	0	510	0	510	0	510	0	510	510	0	0	0		143553	0	510	0	510	0	510	0	510	0	510	0	510	0	510	0	510	0	510	0	510	510	0	0	0
143664	0	510	0	510	0	510	0	510	0	510	0	510	0	510	0	510	0	510	510	0	0	0		143664	0	510	0	510	0	510	0	510	0	510	0	510	0	510	0	510	0	510	0	510	510	0	0	0
143775	0	510	0	510	0	510	0	510	0	510	0	510	0	510	0	510	0	510	510	0	0	0		143775	0	510	0	510	0	510	0	510	0	510	0	510	0	510	0	510	0	510	0	510	510	0	0	0
143885	0	510	0	510	0	510	0	510	0	510	0	510	0	510	0	510	0	510	510	0	0	0		143885	0	510	0	510	0	510	0	510	0	510	0	510	0	510	0	510	0	510	0	510	510	0	0	0
143996	0	510	0	510	0	510	0	510	0	510	0	510	0	510	0	510	0	510	510	0	0	0		143996	0	510	0	510	0	510	0	510	0	510	0	510	0	510	0	510	0	510	0	510	510	0	0	0
144107	0	510	0	510	0	510	0	510	0	510	0	510	0	510	0	510	0	510	510	0	0	0		144107	0	510	0	510	0	510	0	510	0	510	0	510	0	510	0	510	0	510	0	510	510	0	0	0
144218	0	510	0	510	0	510	0	510	0	510	0	510	0	510	0	510	0	510	510	0	0	0		144218	0	510	0	510	0	510	0	510	0	510	0	510	0	510	0	510	0	510	0	510	510	0	0	0
144329	0	510	0	510	0	510	0	510	0	510	0	510	0	510	0	510	0	510	510	0	0	0		144329	0	510	0	510	0	510	0	510	0	510	0	510	0	510	0	510	0	510	0	510	510	0	0	0
144439	0	510	0	510	0	510	0	510	0	510	0	510	0	510	0	510	0	510	510	0	0	0		144439	0	510	0	510	0	510	0	510	0	510	0	510	0	510	0	510	0	510	0	510	510	0	0	0
144550	0	510	0	510	0	510	0	510	0	510	0	510	0	510	0	510	0	510	510	0	0	0		144550	0	510	0	510	0	510	0	510	0	510	0	510	0	510	0	510	0	510	0	510	510	0	0	0
144661	0	510	0	510	0	510	0	510	0	510	0	510	0	510	0	510	0	510	510	0	0	0		144661	0	510	0	510	0	510	0	510	0	510	0	510	0	510	0	510	0	510	0	510	510	0	0	0
144772	0	510	0	510	0	510	0	510	0	510	0	510	0	510	0	510	0	510	510	0	0	0		144772	0	510	0	510	0	510	0	510	0	510	0	510	0	510	0	510	0	510	0	510	510	0	0	0
144882	0	510	0	510	0	510	0	510	0	510	0	510	0	510	0	510	0	510	510	0	0	0		144882	0	510	0	510	0	510	0	510	0	510	0	510	0	510	0	510	0	510	0	510	510	0	0	0
144993	0	510	0	510	0	510	0	510	0	510	0	510	0	510	0	510	0	510	510	0	0	0		144993	0	510	0	510	0	510	0	510	0	510	0	510	0	510	0	510	0	510	0	510	510	0	0	0
145104	0	510	0	510	0	510	0	510	0	510	0	510	0	510	0	510	0	510	510	0	0	0		145104	0	510	0	510	0	510	0	510	0	510	0	510	0	510	0	510	0	510	0	510	510	0	0	0
145215	0	510	0	510	0	510	0	510	0	510	0	510	0	510	0	510	0	510	510	0	0	0		145215	0	510	0	510	0	510	0	510	0	510	0	510	0	510	0	510	0	510	0	510	510	0	0	0
145325	0	510	0	510	0	510	0	510	0	510	0	510	0	510	0	510	0	510	510	0	0	0		145325	0	510	0	510	0	510	0	510	0	510	0	510	0	510	0	510	0	510	0	510	510	0	0	0
145436	0	510	0	510	0	510	0	510	0	510	0	510	0	510	0	510	0	510	510	0	0	0		145436	0	510	0	510	0	510	0	510	0	510	0	510	0	510	0	510	0	510	0	510	510	0	0	0
145547	0	510	0	510	0	510	0	510	0	510	0	510	0	510	0	510	0	510	510	0	0	0		145547	0	510	0	510	0	510	0	510	0	510	0	510	0	510	0	510	0	510	0	510	510	0	0	0
145658	0	510	0	510	0	510	0	510	0	510	0	510	0	510	0	510	0	510	510	0	0	0		145658	0	510	0	510	0	510	0	510	0	510	0	510	0	510	0	510	0	510	0	510	510	0	0	0
145769	0	510	0	510	0	510	0	510	0	510	0	510	0	510	0	510	0	510	510	0	0	0		145769	0	510	0	510	0	510	0	510	0	510	0	510	0	510	0	510	0	510	0	510	510	0	0	0
145879	0	510	0	510	0	510	0	510	0	510	0	510	0	510	0	510	0	510	510	0	0	0		145879	0	510	0	510	0	510	0	510	0	510	0	510	0	510	0	510	0	510	0	510	510	0	0	0
145990	0	510	0	510	0	510	0	510	0	510	0	510	0	510	0	510	0	510	510	0	0	0		145990	0	510	0	510	0	510	0	510	0	510	0	510	0	510	0	510	0	510	0	510	510	0	0	0
146101	0	510	0	510	0	510	0	510	0	510	0	510	0	510	0	510	0	510	510	0	0	0		146101	0	510	0	510	0	510	0	510	0	510	0	510	0	510	0	510	0	510	0	510	510	0	0	0
146212	0	510	0	510	0	510	0	510	0	510	0	510	0	510	0	510	0	510	510	0	0	0		146212	0	510	0	510	0	510	0	510	0	510	0	510	0	510	0	510	0	510	0	510	510	0	0	0
146322	0	510	0	510	0	510	0	510	0	510	0	510	0	510	0	510	0	510	510	0	0	0		146322	0	510	0	510	0	510	0	510	0	510	0	510	0	510	0	510	0	510	0	510	510	0	0	0
146433	0	510	0	510	0	510	0	510	0	510	0	510	0	510	0	510	0	510	510	0	0	0		146433	0	510	0	510	0	510	0	510	0	510	0	510	0	510	0	510	0	510	0	510	510	0	0	0
146544	0	510	0	510	0	510	0	510	0	510	0	510	0	510	0	510	0	510	510	0	0	0		146544	0	510	0	510	0	510	0	510	0	510	0	510	0	510	0	510	0	510	0	510	510	0	0	0
146655	0	510	0	510	0	510	0	510	0	510	0	510	0	510	0	510	0	510	510	0	0	0		146655	0	510	0	510	0	510	0	510	0	510	0	510	0	510	0	510	0	510	0	510	510	0	0	0
146765	0	510	0	510	0	510	0	510	0	510	0	510	0	510	0	510	0	510	510	0	0	0		146765	0	510	0	510	0	510	0	510	0	510	0	510	0	510	0	510	0	510	0	510	510	0	0	0
146876	0	510	0	510	0	510	0	510	0	510	0	510	0	510	0	510	0	510	510	0	0	0		146876	0	510	0	510	0	510	0	510	0	510	0	510	0	510	0	510	0	510	0	510	510	0	0	0
146987	0	510	0	510	0	510	0	510	0	510	0	510	0	510	0	510	0	510	510	0	0	0		146987	0	510	0	510	0	510	0	510	0	510	0	510	0	510	0	510	0	510	0	510	510	0	0	0
147098	0	510	0	510	0	510	0	510	0	510	0	510	0	510	0	510	0	510	510	0	0	0		147098	0	510	0	510	0	510	0	510	0	510	0	510	0	510	0	510	0	510	0	510	510	0	0	0
147208	0	510	0	510	0	510	0	510	0	510	0	510	0	510	0	510	0	510	510	0	0	0		147208	0	510	0	510	0	510	0	510	0	510	0	510	0	510	0	510	0	510	0	510	510	0	0	0
147319	0	510	0	510	0	510	0	510	0	510	0	510	0	510	0	510	0	510	510	0	0	0		147319	0	510	0	510	0	510	0	510	0	510	0	510	0	510	0	510	0	510	0	510	510	0	0	0
147430	0	510	0	510	0	510	0	510	0	510	0	510	0	510	0	510	0	510	510	0	0	0		147430	0	510	0	510	0	510	0	510	0	510	0	510	0	510	0	510	0	510	0	510	510	0	0	0
147541	0	510	0	510	0	510	0	510	0	510	0	510	0	510	0	510	0	510	510	0	0	0		147541	0	510	0	510	0	510	0	510	0	510	0	510	0	510	0	510	0	510	0	510	510	0	0	0
147652	0	510	0	510	0	510	0	510	0	510	0	510	0	510	0	510	0	510	510	0	0	0		147652	0	510	0	510	0	510	0	510	0	510	0	510	0	510	0	510	0	510	0	510	510	0	0	0
147762	0	510	0	510	0	510	0	510	0	510	0	510	0	510	0	510	0	510	510	0	0	0		147762	0	510	0	510	0	510	0	510	0	510	0	510	0	510	0	510	0	510	0	510	510	0	0	0
147873	0	510	0	510	0	510	0	510	0	510	0	510	0	510	0	510	0	510	510	0	0	0		147873	0	510	0	510	0	510	0	510	0	510	0	510	0	510	0	510	0	510	0	510	510	0	0	0
147984	0	510	0	510	0	510	0	510	0	510	0	510	0	510	0	510	0	510	510	0	0	0		147984	0	510	0	510	0	510	0	510	0	510	0	510	0	510	0	510	0	510	0	510	510	0	0	0
148095	0	510	0	510	0	510	0	510	0	510	0	510	0	510	0	510	0	510	510	0	0	0		148095	0	510	0	510	0	510	0	510	0	510	0	510	0	510	0	510	0	510	0	510	510	0	0	0
148205	0	510	0	510	0	510	0	510	0	510	0	510	0	510	0	510	0	510	510	0	0	0		148205	0	510	0	510	0	510	0	510	0	510	0	510	0	510	0	510	0	510	0	510	510	0	0	0
148316	0	510	0	510	0	510	0	510	0	510	0	510	0	510	0	510	0	510	510	0	0	0		148316	0	510	0	510	0	510	0	510	0	510	0	510	0	510	0	510	0	510	0	510	510	0	0	0
148427	0	510	0	510	0	510	0	510	0	510	0	510	0	510	0	510	0	510	510	0	0	0		148427	0	510	0	510	0	510	0	510	0	510	0	510	0	510	0	510	0	510	0	510	510	0	0	0
148538	0	510	0	510	0	510	0	510	0	510	0	510	0	510	0	510	0	510	510	0	0	0		148538	0	510	0	510	0	510	0	510	0	510	0	510	0	510	0	510	0	510	0	510	510	0	0	0
148648	0	510	0	510	0	510	0	510	0	510	0	510	0	510	0	510	0	510	510	0	0	0		148648	0	510	0	510	0	510	0	510	0	510	0	510	0	510	0	510	0	510	0	510	510	0	0	0
148759	0	510	0	510	0	510	0	510	0	510	0	510	0	510	0	510	0	510	510	0	0	0		148759	0	510	0	510	0	510	0	510	0	510	0	510	0	510	0	510	0	510	0	510	510	0	0	0
148870	0	510	0	510	0	510	0	510	0	510	0	510	0	510	0	510	0	510	510	0	0	0		148870	0	510	0	510	0	510	0	510	0	510	0	510	0	510	0	510	0	510	0	510	510	0	0	0
148981	0	510	0	510	0	510	0	510	0	510	0	510	0	510	0	510	0	510	510	0	0	0		148981	0	510	0	510	0	510	0	510	0	510	0	510	0	510	0	510	0	510	0	510	510	0	0	0
149092	0	510	0	510	0	510	0	510	0	510	0	510	0	510	0	510	0	510	510	0	0	0		149092	0	510	0	510	0	510	0	510	0	510	0	510	0	510	0	510	0	510	0	510	510	0	0	0
149202	0	510	0	510	0	510	0	510	0	510	0	510	0	510	0	510	0	510	510	0	0	0		149202	0	510	0	510	0	510	0	510	0	510	0	510	0	510	0	510	0	510	0	510	510	0	0	0
149313	0	510	0	510	0	510	0	510	0	510	0	510	0	510	0	510	0	510	510	0	0	0		149313	0	510	0	510	0	510	0	510	0	510	0	510	0	510	0	510	0	510	0	510	510	0	0	0
149424	0	510	0	510	0	510	0	510	0	510	0	510	0	510	0	510	0	510	510	0	0	0		149424	0	510	0	510	0	510	0	510	0	510	0	510	0	510	0	510	0	510	0	510	510	0	0	0
149535	0	510	0	510	0	510	0	510	0	510	0	510	0	510	0	510	0	510	510	0	0	0		149535	0	510	0	510	0	510	0	510	0	510	0	510	0	510	0	510	0	510	0	510	510	0	0	0
149645	0	510	0	510	0	510	0	510	0	510	0	510	0	510	0	510	0	510	510	0	0	0		149645	0	510	0	510	0	510	0	510	0	510	0	510	0	510	0	510	0	510	0	510	510	0	0	0
149756	0	510	0	510	0	510	0	510	0	510	0	510	0	510	0	510	0	510	510	0	0	0		149756	0	510	0	510	0	510	0	510	0	510	0	510	0	510	0	510	0	510	0	510	510	0	0	0
149867	0	510	0	510	0	510	0	510	0	510	0	510	0	510	0	510	0	510	510	0	0	0		149867	0	510	0	510	0	510	0	510	0	510	0	510	0	510	0	510	0	510	0	510	510	0	0	0
149978	0	510	0	510	0	510	0	510	0	510	0	510	0	510	0	510	0	510	510	0	0	0		149978	0	510	0	510	0	510	0	510	0	510	0	510	0	510	0	510	0	510	0	510	510	0	0	0
150088	0	510	0	510	0	510	0	510	0	510	0	510	0	510	0	510	0	510	510	0	0	0		150088	0	510	0	510	0	510	0	510	0	510	0	510	0	510	0	510	0	510	0	510	510	0	0	0
150199	0	510	0	510	0	510	0	510	0	510	0	510	0	510	0	510	0	510	510	0	0	0		150199	0	510	0	510	0	510	0	510	0	510	0	510	0	510	0	510	0	510	0	510	510	0	0	0
150310	0	510	0	510	0	510	0	510	0	510	0	510	0	510	0	510	0	510	510	0	0	0		150310	0	510	0	510	0	510	0	510	0	510	0	510	0	510	0	510	0	510	0	510	510	0	0	0
150421	0	510	0	510	0	510	0	510	0	510	0	510	0	510	0	510	0	510	510	0	0	0		150421	0	510	0	510	0	510	0	510	0	510	0	510	0	510	0	510	0	510	0	510	510	0	0	0
150531	0	510	0	510	0	510	0	510	0	510	0	510	0	510	0	510	0	510	510	0	0	0		150531	0	510	0	510	0	510	0	510	0	510	0	510	0	510	0	510	0	510	0	510	510	0	0	0
150642	0	510	0	510	0	510	0	510	0	510	0	510	0	510	0	510	0	510	510	0	0	0		150642	0	510	0	510	0	510	0	510	0	510	0	510	0	510	0	510	0	510	0	510	510	0	0	0
150753	0	510	0	510	0	510	0	510	0	510	0	510	0	510	0	510	0	510	510	0	0	0		150753	0	510	0	510	0	510	0	510	0	510	0	510	0	510	0	510	0	510	0	510	510	0	0	0
150864	0	510	0	510	0	510	0	510	0	510	0	510	0	510	0	510	0	510	510	0	0	0		150864	0	510	0	510	0	510	0	510	0	510	0	510	0	510	0	510	0	510	0	510	510	0	0	0
150975	0	510	0	510	0	510	0	510	0	510	0	510	0	510	0	510	0	510	510	0	0	0		150975	0	510	0	510	0	510	0	510	0	510	0	510	0	510	0	510	0	510	0	510	510	0	0	0
151085	0	510	0	510	0	510	0	510	0	510	0	510	0	510	0	510	0	510	510	0	0	0		151085	0	510	0	510	0	510	0	510	0	510	0	510	0	510	0	510	0	510	0	510	510	0	0	0
151196	0	510	0	510	0	510	0	510	0	510	0	510	0	510	0	510	0	510	510	0	0	0		151196	0	510	0	510	0	510	0	510	0	510	0	510	0	510	0	510	0	510	0	510	510	0	0	0
151307	0	510	0	510	0	510	0	510	0	510	0	510	0	510	0	510	0	510	510	0	0	0		151307	0	510	0	510	0	510	0	510	0	510	0	510	0	510	0	510	0	510	0	510	510	0	0	0
151418	0	510	0	510	0	510	0	510	0	510	0	510	0	510	0	510	0	510	510	0	0	0		151418	0	510	0	510	0	510	0	510	0	510	0	510	0	510	0	510	0	510	0	510	510	0	0	0
151528	0	510	0	510	0	510	0	510	0	510	0	510	0	510	0	510	0	510	510	0	0	0		151528	0	510	0	510	0	510	0	510	0	510	0	510	0	510	0	510	0	510	0	510	510	0	0	0
151639	0	510	0	510	0	510	0	510	0	510	0	510	0	510	0	510	0	510	510	0	0	0		151639	0	510	0	510	0	510	0	510	0	510	0	510	0	510	0	510	0	510	0	510	510	0	0	0
151750	0	510	0	510	0	510	0	510	0	510	0	510	0	510	0	510	0	510	510	0	0	0		151750	0	510	0	510	0	510	0	510	0	510	0	510	0	510	0	510	0	510	0	510	510	0	0	0
151861	0	510	0	510	0	510	0	510	0	510	0	510	0	510	0	510	0	510	510	0	0	0		151861	0	510	0	510	0	510	0	510	0	510	0	510	0	510	0	510	0	510	0	510	510	0	0	0
151971	0	510	0	510	0	510	0	510	0	510	0	510	0	510	0	510	0	510	510	0	0	0		151971	0	510	0	510	0	510	0	510	0	510	0	510	0	510	0	510	0	510	0	510	510	0	0	0
152082	0	510	0	510	0	510	0	510	0	510	0	510	0	510	0	510	0	510	510	0	0	0		152082	0	510	0	510	0	510	0	510	0	510	0	510	0	510	0	510	0	510	0	510	510	0	0	0
152193	0	510	0	510	0	510	0	510	0	510	0	510	0	510	0	510	0	510	510	0	0	0		152193	0	510	0	510	0	510	0	510	0	510	0	510	0	510	0	510	0	510	0	510	510	0	0	0
152304	0	510	0	510	0	510	0	510	0	510	0	510	0	510	0	510	0	510	510	0	0	0		152304	0	510	0	510	0	510	0	510	0	510	0	510	0	510	0	510	0	510	0	510	510	0	0	0
152415	0	510	0	510	0	510	0	510	0	510	0	510	0	510	0	510	0	510	510	0	0	0		152415	0	510	0	510	0	510	0	510	0	510	0	510	0	510	0	510	0	510	0	510	510	0	0	0
152525	0	510	0	510	0	510	0	510	0	510	0	510	0	510	0	510	0	510	510	0	0	0		152525	0	510	0	510	0	510	0	510	0	510	0	510	0	510	0	510	0	510	0	510	510	0	0	0
152636	0	510	0	510	0	510	0	510	0	510	0	510	0	510	0	510	0	510	510	0	0	0		152636	0	510	0	510	0	510	0	510	0	510	0	510	0	510	0	510	0	510	0	510	510	0	0	0
152747	0	510	0	510	0	510	0	510	0	510	0	510	0	510	0	510	0	510	510	0	0	0		152747	0	510	0	510	0	510	0	510	0	510	0	510	0	510	0	510	0	510	0	510	510	0	0	0
152858	0	510	0	510	0	510	0	510	0	510	0	510	0	510	0	510	0	510	510	0	0	0		152858	0	510	0	510	0	510	0	510	0	510	0	510	0	510	0	510	0	510	0	510	510	0	0	0
152968	0	510	0	510	0	510	0	510	0	510	0	510	0	510	0	510	0	510	510	0	0	0		152968	0	510	0	510	0	510	0	510	0	510	0	510	0	510	0	510	0	510	0	510	510	0	0	0
153079	0	510	0	510	0	510	0	510	0	510	0	510	0	510	0	510	0	510	510	0	0	0		153079	0	510	0	510	0	510	0	510	0	510	0	510	0	510	0	510	0	510	0	510	510	0	0	0
153190	0	510	0	510	0	510	0	510	0	510	0	510	0	510	0	510	0	510	510	0	0	0		153190	0	510	0	510	0	510	0	510	0	510	0	510	0	510	0	510	0	510	0	510	510	0	0	0
153301	0	510	0	510	0	510	0	510	0	510	0	510	0	510	0	510	0	510	510	0	0	0		153301	0	510	0	510	0	510	0	510	0	510	0	510	0	510	0	510	0	510	0	510	510	0	0	0
153411	0	510	0	510	0	510	0	510	0	510	0	510	0	510	0	510	0	510	510	0	0	0		153411	0	510	0	510	0	510	0	510	0	510	0	510	0	510	0	510	0	510	0	510	510	0	0	0
153522	0	510	0	510	0	510	0	510	0	510	0	510	0	510	0	510	0	510	510	0	0	0		153522	0	510	0	510	0	510	0	510	0	510	0	510	0	510	0	510	0	510	0	510	510	0	0	0
153633	0	510	0	510	0	510	0	510	0	510	0	510	0	510	0	510	0	510	510	0	0	0		153633	0	510	0	510	0	510	0	510	0	510	0	510	0	510	0	510	0	510	0	510	510	0	0	0
153744	0	510	0	510	0	510	0	510	0	510	0	510	0	510	0	510	0	510	510	0	0	0		153744	0	510	0	510	0	510	0	510	0	510	0	510	0	510	0	510	0	510	0	510	510	0	0	0
153854	0	510	0	510	0	510	0	510	0	510	0	510	0	510	0	510	0	510	510	0	0	0		153854	0	510	0	510	0	510	0	510	0	510	0	510	0	510	0	510	0	510	0	510	510	0	0	0
153965	0	510	0	510	0	510	0	510	0	510	0	510	0	510	0	510	0	510	510	0	0	0		153965	0	510	0	510	0	510	0	510	0	510	0	510	0	510	0	510	0	510	0	510	510	0	0	0
154076	0	510	0	510	0	510	0	510	0	510	0	510	0	510	0	510	0	510	510	0	0	0		154076	0	510	0	510	0	510	0	510	0	510	0	510	0	510	0	510	0	510	0	510	510	0	0	0
154187	0	510	0	510	0	510	0	510	0	510	0	510	0	510	0	510	0	510	510	0	0	0		154187	0	510	0	510	0	510	0	510	0	510	0	510	0	510	0	510	0	510	0	510	510	0	0	0
154298	0	510	0	510	0	510	0	510	0	510	0	510	0	510	0	510	0	510	510	0	0	0		154298	0	510	0	510	0	510	0	510	0	510	0	510	0	510	0	510	0	510	0	510	510	0	0	0
154408	0	510	0	510	0	510	0	510	0	510	0	510	0	510	0	510	0	510	510	0	0	0		154408	0	510	0	510	0	510	0	510	0	510	0	510	0	510	0	510	0	510	0	510	510	0	0	0
154519	0	510	0	510	0	510	0	510	0	510	0	510	0	510	0	510	0	510	510	0	0	0		154519	0	510	0	510	0	510	0	510	0	510	0	510	0	510	0	510	0	510	0	510	510	0	0	0
154630	0	510	0	510	0	510	0	510	0	510	0	510	0	510	0	510	0	510	510	0	0	0		154630	0	510	0	510	0	510	0	510	0	510	0	510	0	510	0	510	0	510	0	510	510	0	0	0
154741	0	510	0	510	0	510	0	510	0	510	0	510	0	510	0	510	0	510	510	0	0	0		154741	0	510	0	510	0	510	0	510	0	510	0	510	0	510	0	510	0	510	0	510	510	0	0	0
154851	0	510	0	510	0	510	0	510	0	510	0	510	0	510	0	510	0	510	510	0	0	0		154851	0	510	0	510	0	510	0	510	0	510	0	510	0	510	0	510	0	510	0	510	510	0	0	0
154962	0	510	0	510	0	510	0	510	0	510	0	510	0	510	0	510	0	510	510	0	0	0		154962	0	510	0	510	0	510	0	510	0	510	0	510	0	510	0	510	0	510	0	510	510	0	0	0
155073	0	510	0	510	0	510	0	510	0	510	0	510	0	510	0	510	0	510	510	0	0	0		155073	0	510	0	510	0	510	0	510	0	510	0	510	0	510	0	510	0	510	0	510	510	0	0	0
155184	0	510	0	510	0	510	0	510	0	510	0	510	0	510	0	510	0	510	510	0	0	0		155184	0	510	0	510	0	510	0	510	0	510	0	510	0	510	0	510	0	510	0	510	510	0	0	0
155294	0	510	0	510	0	510	0	510	0	510	0	510	0	510	0	510	0	510	510	0	0	0		155294	0	510	0	510	0	510	0	510	0	510	0	510	0	510	0	510	0	510	0	510	510	0	0	0
155405	0	510	0	510	0	510	0	510	0	510	0	510	0	510	0	510	0	510	510	0	0	0		155405	0	510	0	510	0	510	0	510	0	510	0	510	0	510	0	510	0	510	0	510	510	0	0	0
155516	0	510	0	510	0	510	0	510	0	510	0	510	0	510	0	510	0	510	510	0	0	0		155516	0	510	0	510	0	510	0	510	0	510	0	510	0	510	0	510	0	510	0	510	510	0	0	0
155627	0	510	0	510	0	510	0	510	0	510	0	510	0	510	0	510	0	510	510	0	0	0		155627	0	510	0	510	0	510	0	510	0	510	0	510	0	510	0	510	0	510	0	510	510	0	0	0
155737	0	510	0	510	0	510	0	510	0	510	0	510	0	510	0	510	0	510	510	0	0	0		155737	0	510	0	510	0	510	0	510	0	510	0	510	0	510	0	510	0	510	0	510	510	0	0	0
155848	0	510	0	510	0	510	0	510	0	510	0	510	0	510	0	510	0	510	510	0	0	0		155848	0	510	0	510	0	510	0	510	0	510	0	510	0	510	0	510	0	510	0	510	510	0	0	0
155959	0	510	0	510	0	510	0	510	0	510	0	510	0	510	0	510	0	510	510	0	0	0		155959	0	510	0	510	0	510	0	510	0	510	0	510	0	510	0	510	0	510	0	510	510	0	0	0
156070	0	510	0	510	0	510	0	510	0	510	0	510	0	510	0	510	0	510	510	0	0	0		156070	0	510	0	510	0	510	0	510	0	510	0	510	0	510	0	510	0	510	0	510	510	0	0	0
156181	0	510	0	510	0	510	0	510	0	510	0	510	0	510	0	510	0	510	510	0	0	0		156181	0	510	0	510	0	510	0	510	0	510	0	510	0	510	0	510	0	510	0	510	510	0	0	0
156291	0	510	0	510	0	510	0	510	0	510	0	510	0	510	0	510	0	510	510	0	0	0		156291	0	510	0	510	0	510	0	510	0	510	0	510	0	510	0	510	0	510	0	510	510	0	0	0
156402	0	510	0	510	0	510	0	510	0	510	0	510	0	510	0	510	0	510	510	0	0	0		156402	0	510	0	510	0	510	0	510	0	510	0	510	0	510	0	510	0	510	0	510	510	0	0	0
156513	0	510	0	510	0	510	0	510	0	510	0	510	0	510	0	510	0	510	510	0	0	0		156513	0	510	0	510	0	510	0	510	0	510	0	510	0	510	0	510	0	510	0	510	510	0	0	0
156624	0	510	0	510	0	510	0	510	0	510	0	510	0	510	0	510	0	510	510	0	0	0		156624	0	510	0	510	0	510	0	510	0	510	0	510	0	510	0	510	0	510	0	510	510	0	0	0
156734	0	510	0	510	0	510	0	510	0	510	0	510	0	510	0	510	0	510	510	0	0	0		156734	0	510	0	510	0	510	0	510	0	510	0	510	0	510	0	510	0	510	0	510	510	0	0	0
156845	0	510	0	510	0	510	0	510	0	510	0	510	0	510	0	510	0	510	510	0	0	0		156845	0	510	0	510	0	510	0	510	0	510	0	510	0	510	0	510	0	510	0	510	510	0	0	0
156956	0	510	0	510	0	510	0	510	0	510	0	510	0	510	0	510	0	510	510	0	0	0		156956	0	510	0	510	0	510	0	510	0	510	0	510	0	510	0	510	0	510	0	510	510	0	0	0
157067	0	510	0	510	0	510	0	510	0	510	0	510	0	510	0	510	0	510	510	0	0	0		157067	0	510	0	510	0	510	0	510	0	510	0	510	0	510	0	510	0	510	0	510	510	0	0	0
157177	0	510	0	510	0	510	0	510	0	510	0	510	0	510	0	510	0	510	510	0	0	0		157177	0	510	0	510	0	510	0	510	0	510	0	510	0	510	0	510	0	510	0	510	510	0	0	0
157288	0	510	0	510	0	510	0	510	0	510	0	510	0	510	0	510	0	510	510	0	0	0		157288	0	510	0	510	0	510	0	510	0	510	0	510	0	510	0	510	0	510	0	510	510	0	0	0
157399	0	510	0	510	0	510	0	510	0	510	0	510	0	510	0	510	0	510	510	0	0	0		157399	0	510	0	510	0	510	0	510	0	510	0	510	0	510	0	510	0	510	0	510	510	0	0	0
157510	0	510	0	510	0	510	0	510	0	510	0	510	0	510	0	510	0	510	510	0	0	0		157510	0	510	0	510	0	510	0	510	0	510	0	510	0	510	0	510	0	510	0	510	510	0	0	0
157621	0	510	0	510	0	510	0	510	0	510	0	510	0	510	0	510	0	510	510	0	0	0		157621	0	510	0	510	0	510	0	510	0	510	0	510	0	510	0	510	0	510	0	510	510	0	0	0
157731	0	510	0	510	0	510	0	510	0	510	0	510	0	510	0	510	0	510	510	0	0	0		157731	0	510	0	510	0	510	0	510	0	510	0	510	0	510	0	510	0	510	0	510	510	0	0	0
157842	0	510	0	510	0	510	0	510	0	510	0	510	0	510	0	510	0	510	510	0	0	0		157842	0	510	0	510	0	510	0	510	0	510	0	510	0	510	0	510	0	510	0	510	510	0	0	0
157953	0	510	0	510	0	510	0	510	0	510	0	510	0	510	0	510	0	510	510	0	0	0		157953	0	510	0	510	0	510	0	510	0	510	0	510	0	510	0	510	0	510	0	510	510	0	0	0
158064	0	510	0	510	0	510	0	510	0	510	0	510	0	510	0	510	0	510	510	0	0	0		158064	0	510	0	510	0	510	0	510	0	510	0	510	0	510	0	510	0	510	0	510	510	0	0	0
158174	0	510	0	510	0	510	0	510	0	510	0	510	0	510	0	510	0	510	510	0	0	0		158174	0	510	0	510	0	510	0	510	0	510	0	510	0	510	0	510	0	510	0	510	510	0	0	0
158285	0	510	0	510	0	510	0	510	0	510	0	510	0	510	0	510	0	510	510	0	0	0		158285	0	510	0	510	0	510	0	510	0	510	0	510	0	510	0	510	0	510	0	510	510	0	0	0
158396	0	510	0	510	0	510	0	510	0	510	0	510	0	510	0	510	0	510	510	0	0	0		158396	0	510	0	510	0	510	0	510	0	510	0	510	0	510	0	510	0	510	0	510	510	0	0	0
158507	0	510	0	510	0	510	0	510	0	510	0	510	0	510	0	510	0	510	510	0	0	0		158507	0	510	0	510	0	510	0	510	0	510	0	510	0	510	0	510	0	510	0	510	510	0	0	0
158617	0	510	0	510	0	510	0	510	0	510	0	510	0	510	0	510	0	510	510	0	0	0		158617	0	510	0	510	0	510	0	510	0	510	0	510	0	510	0	510	0	510	0	510	510	0	0	0
158728	0	510	0	510	0	510	0	510	0	510	0	510	0	510	0	510	0	510	510	0	0	0		158728	0	510	0	510	0	510	0	510	0	510	0	510	0	510	0	510	0	510	0	510	510	0	0	0
158839	0	510	0	510	0	510	0	510	0	510	0	510	0	510	0	510	0	510	510	0	0	0		158839	0	510	0	510	0	510	0	510	0	510	0	510	0	510	0	510	0	510	0	510	510	0	0	0
158950	0	510	0	510	0	510	0	510	0	510	0	510	0	510	0	510	0	510	510	0	0	0		158950	0	510	0	510	0	510	0	510	0	510	0	510	0	510	0	510	0	510	0	510	510	0	0	0
159060	0	510	0	510	0	510	0	510	0	510	0	510	0	510	0	510	0	510	510	0	0	0		159060	0	510	0	510	0	510	0	510	0	510	0	510	0	510	0	510	0	510	0	510	510	0	0	0
159171	0	510	0	510	0	510	0	510	0	510	0	510	0	510	0	510	0	510	510	0	0	0		159171	0	510	0	510	0	510	0	510	0	510	0	510	0	510	0	510	0	510	0	510	510	0	0	0
159282	0	510	0	510	0	510	0	510	0	510	0	510	0	510	0	510	0	510	510	0	0	0		159282	0	510	0	510	0	510	0	510	0	510	0	510	0	510	0	510	0	510	0	510	510	0	0	0
159393	0	510	0	510	0	510	0	510	0	510	0	510	0	510	0	510	0	510	510	0	0	0		159393	0	510	0	510	0	510	0	510	0	510	0	510	0	510	0	510	0	510	0	510	510	0	0	0
159504	0	510	0	510	0	510	0	510	0	510	0	510	0	510	0	510	0	510	510	0	0	0		159504	0	510	0	510	0	510	0	510	0	510	0	510	0	510	0	510	0	510	0	510	510	0	0	0
159614	0	510	0	510	0	510	0	510	0	510	0	510	0	510	0	510	0	510	510	0	0	0		159614	0	510	0	510	0	510	0	510	0	510	0	510	0	510	0	510	0	510	0	510	510	0	0	0
159725	0	510	0	510	0	510	0	510	0	510	0	510	0	510	0	510	0	510	510	0	0	0		159725	0	510	0	510	0	510	0	510	0	510	0	510	0	510	0	510	0	510	0	510	510	0	0	0
159836	0	510	0	510	0	510	0	510	0	510	0	510	0	510	0	510	0	510	510	0	0	0		159836	0	510	0	510	0	510	0	510	0	510	0	510	0	510	0	510	0	510	0	510	510	0	0	0
159947	0	510	0	510	0	510	0	510	0	510	0	510	0	510	0	510	0	510	510	0	0	0		159947	0	510	0	510	0	510	0	510	0	510	0	510	0	510	0	510	0	510	0	510	510	0	0	0
160057	0	510	0	510	0	510	0	510	0	510	0	510	0	510	0	510	0	510	510	0	0	0		160057	0	510	0	510	0	510	0	510	0	510	0	510	0	510	0	510	0	510	0	510	510	0	0	0
160168	0	510	0	510	0	510	0	510	0	510	0	510	0	510	0	510	0	510	510	0	0	0		160168	0	510	0	510	0	510	0	510	0	510	0	510	0	510	0	510	0	510	0	510	510	0	0	0
160279	0	510	0	510	0	510	0	510	0	510	0	510	0	510	0	510	0	510	510	0	0	0		160279	0	510	0	510	0	510	0	510	0	510	0	510	0	510	0	510	0	510	0	510	510	0	0	0
160390	0	510	0	510	0	510	0	510	0	510	0	510	0	510	0	510	0	510	510	0	0	0		160390	0	510	0	510	0	510	0	510	0	510	0	510	0	510	0	510	0	510	0	510	510	0	0	0
160500	0	510	0	510	0	510	0	510	0	510	0	510	0	510	0	510	0	510	510	0	0	0		160500	0	510	0	510	0	510	0	510	0	510	0	510	0	510	0	510	0	510	0	510	510	0	0	0
160611	0	510	0	510	0	510	0	510	0	510	0	510	0	510	0	510	0	510	510	0	0	0		160611	0	510	0	510	0	510	0	510	0	510	0	510	0	510	0	510	0	510	0	510	510	0	0	0
160722	0	510	0	510	0	510	0	510	0	510	0	510	0	510	0	510	0	510	510	0	0	0		160722	0	510	0	510	0	510	0	510	0	510	0	510	0	510	0	510	0	510	0	510	510	0	0	0
160833	0	510	0	510	0	510	0	510	0	510	0	510	0	510	0	510	0	510	510	0	0	0		160833	0	510	0	510	0	510	0	510	0	510	0	510	0	510	0	510	0	510	0	510	510	0	0	0
160944	0	510	0	510	0	510	0	510	0	510	0	510	0	510	0	510	0	510	510	0	0	0		160944	0	510	0	510	0	510	0	510	0	510	0	510	0	510	0	510	0	510	0	510	510	0	0	0
161054	0	510	0	510	0	510	0	510	0	510	0	510	0	510	0	510	0	510	510	0	0	0		161054	0	510	0	510	0	510	0	510	0	510	0	510	0	510	0	510	0	510	0	510	510	0	0	0
161165	0	510	0	510	0	510	0	510	0	510	0	510	0	510	0	510	0	510	510	0	0	0		161165	0	510	0	510	0	510	0	510	0	510	0	510	0	510	0	510	0	510	0	510	510	0	0	0
161276	0	510	0	510	0	510	0	510	0	510	0	510	0	510	0	510	0	510	510	0	0	0		161276	0	510	0	510	0	510	0	510	0	510	0	510	0	510	0	510	0	510	0	510	510	0	0	0
161387	0	510	0	510	0	510	0	510	0	510	0	510	0	510	0	510	0	510	510	0	0	0		161387	0	510	0	510	0	510	0	510	0	510	0	510	0	510	0	510	0	510	0	510	510	0	0	0
161497	0	510	0	510	0	510	0	510	0	510	0	510	0	510	0	510	0	510	510	0	0	0		161497	0	510	0	510	0	510	0	510	0	510	0	510	0	510	0	510	0	510	0	510	510	0	0	0
161608	0	510	0	510	0	510	0	510	0	510	0	510	0	510	0	510	0	510	510	0	0	0		161608	0	510	0	510	0	510	0	510	0	510	0	510	0	510	0	510	0	510	0	510	510	0	0	0
161719	0	510	0	510	0	510	0	510	0	510	0	510	0	510	0	510	0	510	510	0	0	0		161719	0	510	0	510	0	510	0	510	0	510	0	510	0	510	0	510	0	510	0	510	510	0	0	0
161830	0	510	0	510	0	510	0	510	0	510	0	510	0	510	0	510	0	510	510	0	0	0		161830	0	510	0	510	0	510	0	510	0	510	0	510	0	510	0	510	0	510	0	510	510	0	0	0
161940	0	510	0	510	0	510	0	510	0	510	0	510	0	510	0	510	0	510	510	0	0	0		161940	0	510	0	510	0	510	0	510	0	510	0	510	0	510	0	510	0	510	0	510	510	0	0	0
162051	0	510	0	510	0	510	0	510	0	510	0	510	0	510	0	510	0	510	510	0	0	0		162051	0	510	0	510	0	510	0	510	0	510	0	510	0	510	0	510	0	510	0	510	510	0	0	0
162162	0	510	0	510	0	510	0	510	0	510	0	510	0	510	0	510	0	510	510	0	0	0		162162	0	510	0	510	0	510	0	510	0	510	0	510	0	510	0	510	0	510	0	510	510	0	0	0
162273	0	510	0	510	0	510	0	510	0	510	0	510	0	510	0	510	0	510	510	0	0	0		162273	0	510	0	510	0	510	0	510	0	510	0	510	0	510	0	510	0	510	0	510	510	0	0	0
162383	0	510	0	510	0	510	0	510	0	510	0	510	0	510	0	510	0	510	510	0	0	0		162383	0	510	0	510	0	510	0	510	0	510	0	510	0	510	0	510	0	510	0	510	510	0	0	0
162494	0	510	0	510	0	510	0	510	0	510	0	510	0	510	0	510	0	510	510	0	0	0		162494	0	510	0	510	0	510	0	510	0	510	0	510	0	510	0	510	0	510	0	510	510	0	0	0
162605	0	510	0	510	0	510	0	510	0	510	0	510	0	510	0	510	0	510	510	0	0	0		162605	0	510	0	510	0	510	0	510	0	510	0	510	0	510	0	510	0	510	0	510	510	0	0	0
162716	0	510	0	510	0	510	0	510	0	510	0	510	0	510	0	510	0	510	510	0	0	0		162716	0	510	0	510	0	510	0	510	0	510	0	510	0	510	0	510	0	510	0	510	510	0	0	0
162827	0	510	0	510	0	510	0	510	0	510	0	510	0	510	0	510	0	510	510	0	0	0		162827	0	510	0	510	0	510	0	510	0	510	0	510	0	510	0	510	0	510	0	510	510	0	0	0
162937	0	510	0	510	0	510	0	510	0	510	0	510	0	510	0	510	0	510	510	0	0	0		162937	0	510	0	510	0	510	0	510	0	510	0	510	0	510	0	510	0	510	0	510	510	0	0	0
163048	0	510	0	510	0	510	0	510	0	510	0	510	0	510	0	510	0	510	510	0	0	0		163048	0	510	0	510	0	510	0	510	0	510	0	510	0	510	0	510	0	510	0	510	510	0	0	0
163159	0	510	0	510	0	510	0	510	0	510	0	510	0	510	0	510	0	510	510	0	0	0		163159	0	510	0	510	0	510	0	510	0	510	0	510	0	510	0	510	0	510	0	510	510	0	0	0
163270	0	510	0	510	0	510	0	510	0	510	0	510	0	510	0	510	0	510	510	0	0	0		163270	0	510	0	510	0	510	0	510	0	510	0	510	0	510	0	510	0	510	0	510	510	0	0	0
163380	0	510	0	510	0	510	0	510	0	510	0	510	0	510	0	510	0	510	510	0	0	0		163380	0	510	0	510	0	510	0	510	0	510	0	510	0	510	0	510	0	510	0	510	510	0	0	0
163491	0	510	0	510	0	510	0	510	0	510	0	510	0	510	0	510	0	510	510	0	0	0		163491	0	510	0	510	0	510	0	510	0	510	0	510	0	510	0	510	0	510	0	510	510	0	0	0
163602	0	510	0	510	0	510	0	510	0	510	0	510	0	510	0	510	0	510	510	0	0	0		163602	0	510	0	510	0	510	0	510	0	510	0	510	0	510	0	510	0	510	0	510	510	0	0	0
163713	0	510	0	510	0	510	0	510	0	510	0	510	0	510	0	510	0	510	510	0	0	0		163713	0	510	0	510	0	510	0	510	0	510	0	510	0	510	0	510	0	510	0	510	510	0	0	0
163823	0	510	0	510	0	510	0	510	0	510	0	510	0	510	0	510	0	510	510	0	0	0		163823	0	510	0	510	0	510	0	510	0	510	0	510	0	510	0	510	0	510	0	510	510	0	0	0
163934	0	510	0	510	0	510	0	510	0	510	0	510	0	510	0	510	0	510	510	0	0	0		163934	0	510	0	510	0	510	0	510	0	510	0	510	0	510	0	510	0	510	0	510	510	0	0	0
164045	0	510	0	510	0	510	0	510	0	510	0	510	0	510	0	510	0	510	510	0	0	0		164045	0	510	0	510	0	510	0	510	0	510	0	510	0	510	0	510	0	510	0	510	510	0	0	0
164156	0	510	0	510	0	510	0	510	0	510	0	510	0	510	0	510	0	510	510	0	0	0		164156	0	510	0	510	0	510	0	510	0	510	0	510	0	510	0	510	0	510	0	510	510	0	0	0
164267	0	510	0	510	0	510	0	510	0	510	0	510	0	510	0	510	0	510	510	0	0	0		164267	0	510	0	510	0	510	0	510	0	510	0	510	0	510	0	510	0	510	0	510	510	0	0	0
164377	0	510	0	510	0	510	0	510	0	510	0	510	0	510	0	510	0	510	510	0	0	0		164377	0	510	0	510	0	510	0	510	0	510	0	510	0	510	0	510	0	510	0	510	510	0	0	0
164488	0	510	0	510	0	510	0	510	0	510	0	510	0	510	0	510	0	510	510	0	0	0		164488	0	510	0	510	0	510	0	510	0	510	0	510	0	510	0	510	0	510	0	510	510	0	0	0
164599	0	510	0	510	0	510	0	510	0	510	0	510	0	510	0	510	0	510	510	0	0	0		164599	0	510	0	510	0	510	0	510	0	510	0	510	0	510	0	510	0	510	0	510	510	0	0	0
164710	0	510	0	510	0	510	0	510	0	510	0	510	0	510	0	510	0	510	510	0	0	0		164710	0	510	0	510	0	510	0	510	0	510	0	510	0	510	0	510	0	510	0	510	510	0	0	0
164820	0	510	0	510	0	510	0	510	0	510	0	510	0	510	0	510	0	510	510	0	0	0		164820	0	510	0	510	0	510	0	510	0	510	0	510	0	510	0	510	0	510	0	510	510	0	0	0
164931	0	510	0	510	0	510	0	510	0	510	0	510	0	510	0	510	0	510	510	0	0	0		164931	0	510	0	510	0	510	0	510	0	510	0	510	0	510	0	510	0	510	0	510	510	0	0	0
165042	0	510	0	510	0	510	0	510	0	510	0	510	0	510	0	510	0	510	510	0	0	0		165042	0	510	0	510	0	510	0	510	0	510	0	510	0	510	0	510	0	510	0	510	510	0	0	0
165153	0	510	0	510	0	510	0	510	0	510	0	510	0	510	0	510	0	510	510	0	0	0		165153	0	510	0	510	0	510	0	510	0	510	0	510	0	510	0	510	0	510	0	510	510	0	0	0
165263	0	510	0	510	0	510	0	510	0	510	0	510	0	510	0	510	0	510	510	0	0	0		165263	0	510	0	510	0	510	0	510	0	510	0	510	0	510	0	510	0	510	0	510	510	0	0	0
165374	0	510	0	510	0	510	0	510	0	510	0	510	0	510	0	510	0	510	510	0	0	0		165374	0	510	0	510	0	510	0	510	0	510	0	510	0	510	0	510	0	510	0	510	510	0	0	0
165485	0	510	0	510	0	510	0	510	0	510	0	510	0	510	0	510	0	510	510	0	0	0		165485	0	510	0	510	0	510	0	510	0	510	0	510	0	510	0	510	0	510	0	510	510	0	0	0
165596	0	510	0	510	0	510	0	510	0	510	0	510	0	510	0	510	0	510	510	0	0	0		165596	0	510	0	510	0	510	0	510	0	510	0	510	0	510	0	510	0	510	0	510	510	0	0	0
165706	0	510	0	510	0	510	0	510	0	510	0	510	0	510	0	510	0	510	510	0	0	0		165706	0	510	0	510	0	510	0	510	0	510	0	510	0	510	0	510	0	510	0	510	510	0	0	0
165817	0	510	0	510	0	510	0	510	0	510	0	510	0	510	0	510	0	510	510	0	0	0		165817	0	510	0	510	0	510	0	510	0	510	0	510	0	510	0	510	0	510	0	510	510	0	0	0
165928	0	510	0	510	0	510	0	510	0	510	0	510	0	510	0	510	0	510	510	0	0	0		165928	0	510	0	510	0	510	0	510	0	510	0	510	0	510	0	510	0	510	0	510	510	0	0	0
166039	0	510	0	510	0	510	0	510	0	510	0	510	0	510	0	510	0	510	510	0	0	0		166039	0	510	0	510	0	510	0	510	0	510	0	510	0	510	0	510	0	510	0	510	510	0	0	0
166150	0	510	0	510	0	510	0	510	0	510	0	510	0	510	0	510	0	510	510	0	0	0		166150	0	510	0	510	0	510	0	510	0	510	0	510	0	510	0	510	0	510	0	510	510	0	0	0
166260	0	510	0	510	0	510	0	510	0	510	0	510	0	510	0	510	0	510	510	0	0	0		166260	0	510	0	510	0	510	0	510	0	510	0	510	0	510	0	510	0	510	0	510	510	0	0	0
166371	0	510	0	510	0	510	0	510	0	510	0	510	0	510	0	510	0	510	510	0	0	0		166371	0	510	0	510	0	510	0	510	0	510	0	510	0	510	0	510	0	510	0	510	510	0	0	0
166482	0	510	0	510	0	510	0	510	0	510	0	510	0	510	0	510	0	510	510	0	0	0		166482	0	510	0	510	0	510	0	510	0	510	0	510	0	510	0	510	0	510	0	510	510	0	0	0
166593	0	510	0	510	0	510	0	510	0	510	0	510	0	510	0	510	0	510	510	0	0	0		166593	0	510	0	510	0	510	0	510	0	510	0	510	0	510	0	510	0	510	0	510	510	0	0	0
166703	0	510	0	510	0	510	0	510	0	510	0	510	0	510	0	510	0	510	510	0	0	0		166703	0	510	0	510	0	510	0	510	0	510	0	510	0	510	0	510	0	510	0	510	510	0	0	0
166814	0	510	0	510	0	510	0	510	0	510	0	510	0	510	0	510	0	510	510	0	0	0		166814	0	510	0	510	0	510	0	510	0	510	0	510	0	510	0	510	0	510	0	510	510	0	0	0
166925	0	510	0	510	0	510	0	510	0	510	0	510	0	510	0	510	0	510	510	0	0	0		166925	0	510	0	510	0	510	0	510	0	510	0	510	0	510	0	510	0	510	0	510	510	0	0	0
167036	0	510	0	510	0	510	0	510	0	510	0	510	0	510	0	510	0	510	510	0	0	0		167036	0	510	0	510	0	510	0	510	0	510	0	510	0	510	0	510	0	510	0	510	510	0	0	0
167146	0	510	0	510	0	510	0	510	0	510	0	510	0	510	0	510	0	510	510	0	0	0		167146	0	510	0	510	0	510	0	510	0	510	0	510	0	510	0	510	0	510	0	510	510	0	0	0
167257	0	510	0	510	0	510	0	510	0	510	0	510	0	510	0	510	0	510	510	0	0	0		167257	0	510	0	510	0	510	0	510	0	510	0	510	0	510	0	510	0	510	0	510	510	0	0	0
167368	0	510	0	510	0	510	0	510	0	510	0	510	0	510	0	510	0	510	510	0	0	0		167368	0	510	0	510	0	510	0	510	0	510	0	510	0	510	0	510	0	510	0	510	510	0	0	0
167479	0	510	0	510	0	510	0	510	0	510	0	510	0	510	0	510	0	510	510	0	0	0		167479	0	510	0	510	0	510	0	510	0	510	0	510	0	510	0	510	0	510	0	510	510	0	0	0
167589	0	510	0	510	0	510	0	510	0	510	0	510	0	510	0	510	0	510	510	0	0	0		167589	0	510	0	510	0	510	0	510	0	510	0	510	0	510	0	510	0	510	0	510	510	0	0	0
167700	0	510	0	510	0	510	0	510	0	510	0	510	0	510	0	510	0	510	510	0	0	0		167700	0	510	0	510	0	510	0	510	0	510	0	510	0	510	0	510	0	510	0	510	510	0	0	0
167811	0	510	0	510	0	510	0	510	0	510	0	510	0	510	0	510	0	510	510	0	0	0		167811	0	510	0	510	0	510	0	510	0	510	0	510	0	510	0	510	0	510	0	510	510	0	0	0
167922	0	510	0	510	0	510	0	510	0	510	0	510	0	510	0	510	0	510	510	0	0	0		167922	0	510	0	510	0	510	0	510	0	510	0	510	0	510	0	510	0	510	0	510	510	0	0	0
168033	0	510	0	510	0	510	0	510	0	510	0	510	0	510	0	510	0	510	510	0	0	0		168033	0	510	0	510	0	510	0	510	0	510	0	510	0	510	0	510	0	510	0	510	510	0	0	0
168143	0	510	0	510	0	510	0	510	0	510	0	510	0	510	0	510	0	510	510	0	0	0		168143	0	510	0	510	0	510	0	510	0	510	0	510	0	510	0	510	0	510	0	510	510	0	0	0
168254	0	510	0	510	0	510	0	510	0	510	0	510	0	510	0	510	0	510	510	0	0	0		168254	0	510	0	510	0	510	0	510	0	510	0	510	0	510	0	510	0	510	0	510	510	0	0	0
168365	0	510	0	510	0	510	0	510	0	510	0	510	0	510	0	510	0	510	510	0	0	0		168365	0	510	0	510	0	510	0	510	0	510	0	510	0	510	0	510	0	510	0	510	510	0	0	0
168476	0	510	0	510	0	510	0	510	0	510	0	510	0	510	0	510	0	510	510	0	0	0		168476	0	510	0	510	0	510	0	510	0	510	0	510	0	510	0	510	0	510	0	510	510	0	0	0
168586	0	510	0	510	0	510	0	510	0	510	0	510	0	510	0	510	0	510	510	0	0	0		168586	0	510	0	510	0	510	0	510	0	510	0	510	0	510	0	510	0	510	0	510	510	0	0	0
168697	0	510	0	510	0	510	0	510	0	510	0	510	0	510	0	510	0	510	510	0	0	0		168697	0	510	0	510	0	510	0	510	0	510	0	510	0	510	0	510	0	510	0	510	510	0	0	0
168808	0	510	0	510	0	510	0	510	0	510	0	510	0	510	0	510	0	510	510	0	0	0		168808	0	510	0	510	0	510	0	510	0	510	0	510	0	510	0	510	0	510	0	510	510	0	0	0
168919	0	510	0	510	0	510	0	510	0	510	0	510	0	510	0	510	0	510	510	0	0	0		168919	0	510	0	510	0	510	0	510	0	510	0	510	0	510	0	510	0	510	0	510	510	0	0	0
169029	0	510	0	510	0	510	0	510	0	510	0	510	0	510	0	510	0	510	510	0	0	0		169029	0	510	0	510	0	510	0	510	0	510	0	510	0	510	0	510	0	510	0	510	510	0	0	0
169140	0	510	0	510	0	510	0	510	0	510	0	510	0	510	0	510	0	510	510	0	0	0		169140	0	510	0	510	0	510	0	510	0	510	0	510	0	510	0	510	0	510	0	510	510	0	0	0
169251	0	510	0	510	0	510	0	510	0	510	0	510	0	510	0	510	0	510	510	0	0	0		169251	0	510	0	510	0	510	0	510	0	510	0	510	0	510	0	510	0	510	0	510	510	0	0	0
169362	0	510	0	510	0	510	0	510	0	510	0	510	0	510	0	510	0	510	510	0	0	0		169362	0	510	0	510	0	510	0	510	0	510	0	510	0	510	0	510	0	510	0	510	510	0	0	0
169473	0	510	0	510	0	510	0	510	0	510	0	510	0	510	0	510	0	510	510	0	0	0		169473	0	510	0	510	0	510	0	510	0	510	0	510	0	510	0	510	0	510	0	510	510	0	0	0
169583	0	510	0	510	0	510	0	510	0	510	0	510	0	510	0	510	0	510	510	0	0	0		169583	0	510	0	510	0	510	0	510	0	510	0	510	0	510	0	510	0	510	0	510	510	0	0	0
169694	0	510	0	510	0	510	0	510	0	510	0	510	0	510	0	510	0	510	510	0	0	0		169694	0	510	0	510	0	510	0	510	0	510	0	510	0	510	0	510	0	510	0	510	510	0	0	0
169805	0	510	0	510	0	510	0	510	0	510	0	510	0	510	0	510	0	510	510	0	0	0		169805	0	510	0	510	0	510	0	510	0	510	0	510	0	510	0	510	0	510	0	510	510	0	0	0
169916	0	510	0	510	0	510	0	510	0	510	0	510	0	510	0	510	0	510	510	0	0	0		169916	0	510	0	510	0	510	0	510	0	510	0	510	0	510	0	510	0	510	0	510	510	0	0	0
170026	0	510	0	510	0	510	0	510	0	510	0	510	0	510	0	510	0	510	510	0	0	0		170026	0	510	0	510	0	510	0	510	0	510	0	510	0	510	0	510	0	510	0	510	510	0	0	0
170137	0	510	0	510	0	510	0	510	0	510	0	510	0	510	0	510	0	510	510	0	0	0		170137	0	510	0	510	0	510	0	510	0	510	0	510	0	510	0	510	0	510	0	510	510	0	0	0
170248	0	510	0	510	0	510	0	510	0	510	0	510	0	510	0	510	0	510	510	0	0	0		170248	0	510	0	510	0	510	0	510	0	510	0	510	0	510	0	510	0	510	0	510	510	0	0	0
170359	0	510	0	510	0	510	0	510	0	510	0	510	0	510	0	510	0	510	510	0	0	0		170359	0	510	0	510	0	510	0	510	0	510	0	510	0	510	0	510	0	510	0	510	510	0	0	0
170469	0	510	0	510	0	510	0	510	0	510	0	510	0	510	0	510	0	510	510	0	0	0		170469	0	510	0	510	0	510	0	510	0	510	0	510	0	510	0	510	0	510	0	510	510	0	0	0
170580	0	510	0	510	0	510	0	510	0	510	0	510	0	510	0	510	0	510	510	0	0	0		170580	0	510	0	510	0	510	0	510	0	510	0	510	0	510	0	510	0	510	0	510	510	0	0	0
170691	0	510	0	510	0	510	0	510	0	510	0	510	0	510	0	510	0	510	510	0	0	0		170691	0	510	0	510	0	510	0	510	0	510	0	510	0	510	0	510	0	510	0	510	510	0	0	0
170802	0	510	0	510	0	510	0	510	0	510	0	510	0	510	0	510	0	510	510	0	0	0		170802	0	510	0	510	0	510	0	510	0	510	0	510	0	510	0	510	0	510	0	510	510	0	0	0
170912	0	510	0	510	0	510	0	510	0	510	0	510	0	510	0	510	0	510	510	0	0	0		170912	0	510	0	510	0	510	0	510	0	510	0	510	0	510	0	510	0	510	0	510	510	0	0	0
171023	0	510	0	510	0	510	0	510	0	510	0	510	0	510	0	510	0	510	510	0	0	0		171023	0	510	0	510	0	510	0	510	0	510	0	510	0	510	0	510	0	510	0	510	510	0	0	0
171134	0	510	0	510	0	510	0	510	0	510	0	510	0	510	0	510	0	510	510	0	0	0		171134	0	510	0	510	0	510	0	510	0	510	0	510	0	510	0	510	0	510	0	510	510	0	0	0
171245	0	510	0	510	0	510	0	510	0	510	0	510	0	510	0	510	0	510	510	0	0	0		171245	0	510	0	510	0	510	0	510	0	510	0	510	0	510	0	510	0	510	0	510	510	0	0	0
171356	0	510	0	510	0	510	0	510	0	510	0	510	0	510	0	510	0	510	510	0	0	0		171356	0	510	0	510	0	510	0	510	0	510	0	510	0	510	0	510	0	510	0	510	510	0	0	0
171466	0	510	0	510	0	510	0	510	0	510	0	510	0	510	0	510	0	510	510	0	0	0		171466	0	510	0	510	0	510	0	510	0	510	0	510	0	510	0	510	0	510	0	510	510	0	0	0
171577	0	510	0	510	0	510	0	510	0	510	0	510	0	510	0	510	0	510	510	0	0	0		171577	0	510	0	510	0	510	0	510	0	510	0	510	0	510	0	510	0	510	0	510	510	0	0	0
171688	0	510	0	510	0	510	0	510	0	510	0	510	0	510	0	510	0	510	510	0	0	0		171688	0	510	0	510	0	510	0	510	0	510	0	510	0	510	0	510	0	510	0	510	510	0	0	0
171799	0	510	0	510	0	510	0	510	0	510	0	510	0	510	0	510	0	510	510	0	0	0		171799	0	510	0	510	0	510	0	510	0	510	0	510	0	510	0	510	0	510	0	510	510	0	0	0
171909	0	510	0	510	0	510	0	510	0	510	0	510	0	510	0	510	0	510	510	0	0	0		171909	0	510	0	510	0	510	0	510	0	510	0	510	0	510	0	510	0	510	0	510	510	0	0	0
172020	0	510	0	510	0	510	0	510	0	510	0	510	0	510	0	510	0	510	510	0	0	0		172020	0	510	0	510	0	510	0	510	0	510	0	510	0	510	0	510	0	510	0	510	510	0	0	0
172131	0	510	0	510	0	510	0	510	0	510	0	510	0	510	0	510	0	510	510	0	0	0		172131	0	510	0	510	0	510	0	510	0	510	0	510	0	510	0	510	0	510	0	510	510	0	0	0
172242	0	510	0	510	0	510	0	510	0	510	0	510	0	510	0	510	0	510	510	0	0	0		172242	0	510	0	510	0	510	0	510	0	510	0	510	0	510	0	510	0	510	0	510	510	0	0	0
172352	0	510	0	510	0	510	0	510	0	510	0	510	0	510	0	510	0	510	510	0	0	0		172352	0	510	0	510	0	510	0	510	0	510	0	510	0	510	0	510	0	510	0	510	510	0	0	0
172463	0	510	0	510	0	510	0	510	0	510	0	510	0	510	0	510	0	510	510	0	0	0		172463	0	510	0	510	0	510	0	510	0	510	0	510	0	510	0	510	0	510	0	510	510	0	0	0
172574	0	510	0	510	0	510	0	510	0	510	0	510	0	510	0	510	0	510	510	0	0	0		172574	0	510	0	510	0	510	0	510	0	510	0	510	0	510	0	510	0	510	0	510	510	0	0	0
172685	0	510	0	510	0	510	0	510	0	510	0	510	0	510	0	510	0	510	510	0	0	0		172685	0	510	0	510	0	510	0	510	0	510	0	510	0	510	0	510	0	510	0	510	510	0	0	0
172796	0	510	0	510	0	510	0	510	0	510	0	510	0	510	0	510	0	510	510	0	0	0		172796	0	510	0	510	0	510	0	510	0	510	0	510	0	510	0	510	0	510	0	510	510	0	0	0
172906	0	510	0	510	0	510	0	510	0	510	0	510	0	510	0	510	0	510	510	0	0	0		172906	0	510	0	510	0	510	0	510	0	510	0	510	0	510	0	510	0	510	0	510	510	0	0	0
173017	0	510	0	510	0	510	0	510	0	510	0	510	0	510	0	510	0	510	510	0	0	0		173017	0	510	0	510	0	510	0	510	0	510	0	510	0	510	0	510	0	510	0	510	510	0	0	0
173128	0	510	0	510	0	510	0	510	0	510	0	510	0	510	0	510	0	510	510	0	0	0		173128	0	510	0	510	0	510	0	510	0	510	0	510	0	510	0	510	0	510	0	510	510	0	0	0
173239	0	510	0	510	0	510	0	510	0	510	0	510	0	510	0	510	0	510	510	0	0	0		173239	0	510	0	510	0	510	0	510	0	510	0	510	0	510	0	510	0	510	0	510	510	0	0	0
173349	0	510	0	510	0	510	0	510	0	510	0	510	0	510	0	510	0	510	510	0	0	0		173349	0	510	0	510	0	510	0	510	0	510	0	510	0	510	0	510	0	510	0	510	510	0	0	0
173460	0	510	0	510	0	510	0	510	0	510	0	510	0	510	0	510	0	510	510	0	0	0		173460	0	510	0	510	0	510	0	510	0	510	0	510	0	510	0	510	0	510	0	510	510	0	0	0
173571	0	510	0	510	0	510	0	510	0	510	0	510	0	510	0	510	0	510	510	0	0	0		173571	0	510	0	510	0	510	0	510	0	510	0	510	0	510	0	510	0	510	0	510	510	0	0	0
173682	0	510	0	510	0	510	0	510	0	510	0	510	0	510	0	510	0	510	510	0	0	0		173682	0	510	0	510	0	510	0	510	0	510	0	510	0	510	0	510	0	510	0	510	510	0	0	0
173792	0	510	0	510	0	510	0	510	0	510	0	510	0	510	0	510	0	510	510	0	0	0		173792	0	510	0	510	0	510	0	510	0	510	0	510	0	510	0	510	0	510	0	510	510	0	0	0
173903	0	510	0	510	0	510	0	510	0	510	0	510	0	510	0	510	0	510	510	0	0	0		173903	0	510	0	510	0	510	0	510	0	510	0	510	0	510	0	510	0	510	0	510	510	0	0	0
174014	0	510	0	510	0	510	0	510	0	510	0	510	0	510	0	510	0	510	510	0	0	0		174014	0	510	0	510	0	510	0	510	0	510	0	510	0	510	0	510	0	510	0	510	510	0	0	0
174125	0	510	0	510	0	510	0	510	0	510	0	510	0	510	0	510	0	510	510	0	0	0		174125	0	510	0	510	0	510	0	510	0	510	0	510	0	510	0	510	0	510	0	510	510	0	0	0
174235	0	510	0	510	0	510	0	510	0	510	0	510	0	510	0	510	0	510	510	0	0	0		174235	0	510	0	510	0	510	0	510	0	510	0	510	0	510	0	510	0	510	0	510	510	0	0	0
174346	0	510	0	510	0	510	0	510	0	510	0	510	0	510	0	510	0	510	510	0	0	0		174346	0	510	0	510	0	510	0	510	0	510	0	510	0	510	0	510	0	510	0	510	510	0	0	0
174457	0	510	0	510	0	510	0	510	0	510	0	510	0	510	0	510	0	510	510	0	0	0		174457	0	510	0	510	0	510	0	510	0	510	0	510	0	510	0	510	0	510	0	510	510	0	0	0
174568	0	510	0	510	0	510	0	510	0	510	0	510	0	510	0	510	0	510	510	0	0	0		174568	0	510	0	510	0	510	0	510	0	510	0	510	0	510	0	510	0	510	0	510	510	0	0	0
174679	0	510	0	510	0	510	0	510	0	510	0	510	0	510	0	510	0	510	510	0	0	0		174679	0	510	0	510	0	510	0	510	0	510	0	510	0	510	0	510	0	510	0	510	510	0	0	0
174789	0	510	0	510	0	510	0	510	0	510	0	510	0	510	0	510	0	510	510	0	0	0		174789	0	510	0	510	0	510	0	510	0	510	0	510	0	510	0	510	0	510	0	510	510	0	0	0
174900	0	510	0	510	0	510	0	510	0	510	0	510	0	510	0	510	0	510	510	0	0	0		174900	0	510	0	510	0	510	0	510	0	510	0	510	0	510	0	510	0	510	0	510	510	0	0	0
175011	0	510	0	510	0	510	0	510	0	510	0	510	0	510	0	510	0	510	510	0	0	0		175011	0	510	0	510	0	510	0	510	0	510	0	510	0	510	0	510	0	510	0	510	510	0	0	0
175122	0	510	0	510	0	510	0	510	0	510	0	510	0	510	0	510	0	510	510	0	0	0		175122	0	510	0	510	0	510	0	510	0	510	0	510	0	510	0	510	0	510	0	510	510	0	0	0
175232	0	510	0	510	0	510	0	510	0	510	0	510	0	510	0	510	0	510	510	0	0	0		175232	0	510	0	510	0	510	0	510	0	510	0	510	0	510	0	510	0	510	0	510	510	0	0	0
175343	0	510	0	510	0	510	0	510	0	510	0	510	0	510	0	510	0	510	510	0	0	0		175343	0	510	0	510	0	510	0	510	0	510	0	510	0	510	0	510	0	510	0	510	510	0	0	0
175454	0	510	0	510	0	510	0	510	0	510	0	510	0	510	0	510	0	510	510	0	0	0		175454	0	510	0	510	0	510	0	510	0	510	0	510	0	510	0	510	0	510	0	510	510	0	0	0
175565	0	510	0	510	0	510	0	510	0	510	0	510	0	510	0	510	0	510	510	0	0	0		175565	0	510	0	510	0	510	0	510	0	510	0	510	0	510	0	510	0	510	0	510	510	0	0	0
175675	0	510	0	510	0	510	0	510	0	510	0	510	0	510	0	510	0	510	510	0	0	0		175675	0	510	0	510	0	510	0	510	0	510	0	510	0	510	0	510	0	510	0	510	510	0	0	0
175786	0	510	0	510	0	510	0	510	0	510	0	510	0	510	0	510	0	510	510	0	0	0		175786	0	510	0	510	0	510	0	510	0	510	0	510	0	510	0	510	0	510	0	510	510	0	0	0
175897	0	510	0	510	0	510	0	510	0	510	0	510	0	510	0	510	0	510	510	0	0	0		175897	0	510	0	510	0	510	0	510	0	510	0	510	0	510	0	510	0	510	0	510	510	0	0	0
176008	0	510	0	510	0	510	0	510	0	510	0	510	0	510	0	510	0	510	510	0	0	0		176008	0	510	0	510	0	510	0	510	0	510	0	510	0	510	0	510	0	510	0	510	510	0	0	0
176119	0	510	0	510	0	510	0	510	0	510	0	510	0	510	0	510	0	510	510	0	0	0		176119	0	510	0	510	0	510	0	510	0	510	0	510	0	510	0	510	0	510	0	510	510	0	0	0
176229	0	510	0	510	0	510	0	510	0	510	0	510	0	510	0	510	0	510	510	0	0	0		176229	0	510	0	510	0	510	0	510	0	510	0	510	0	510	0	510	0	510	0	510	510	0	0	0
176340	0	510	0	510	0	510	0	510	0	510	0	510	0	510	0	510	0	510	510	0	0	0		176340	0	510	0	510	0	510	0	510	0	510	0	510	0	510	0	510	0	510	0	510	510	0	0	0
176451	0	510	0	510	0	510	0	510	0	510	0	510	0	510	0	510	0	510	510	0	0	0		176451	0	510	0	510	0	510	0	510	0	510	0	510	0	510	0	510	0	510	0	510	510	0	0	0
176562	0	510	0	510	0	510	0	510	0	510	0	510	0	510	0	510	0	510	510	0	0	0		176562	0	510	0	510	0	510	0	510	0	510	0	510	0	510	0	510	0	510	0	510	510	0	0	0
176672	0	510	0	510	0	510	0	510	0	510	0	510	0	510	0	510	0	510	510	0	0	0		176672	0	510	0	510	0	510	0	510	0	510	0	510	0	510	0	510	0	510	0	510	510	0	0	0
176783	0	510	0	510	0	510	0	510	0	510	0	510	0	510	0	510	0	510	510	0	0	0		176783	0	510	0	510	0	510	0	510	0	510	0	510	0	510	0	510	0	510	0	510	510	0	0	0
176894	0	510	0	510	0	510	0	510	0	510	0	510	0	510	0	510	0	510	510	0	0	0		176894	0	510	0	510	0	510	0	510	0	510	0	510	0	510	0	510	0	510	0	510	510	0	0	0
177005	0	510	0	510	0	510	0	510	0	510	0	510	0	510	0	510	0	510	510	0	0	0		177005	0	510	0	510	0	510	0	510	0	510	0	510	0	510	0	510	0	510	0	510	510	0	0	0
177115	0	510	0	510	0	510	0	510	0	510	0	510	0	510	0	510	0	510	510	0	0	0		177115	0	510	0	510	0	510	0	510	0	510	0	510	0	510	0	510	0	510	0	510	510	0	0	0
177226	0	510	0	510	0	510	0	510	0	510	0	510	0	510	0	510	0	510	510	0	0	0		177226	0	510	0	510	0	510	0	510	0	510	0	510	0	510	0	510	0	510	0	510	510	0	0	0
177337	0	510	0	510	0	510	0	510	0	510	0	510	0	510	0	510	0	510	510	0	0	0		177337	0	510	0	510	0	510	0	510	0	510	0	510	0	510	0	510	0	510	0	510	510	0	0	0
177448	0	510	0	510	0	510	0	510	0	510	0	510	0	510	0	510	0	510	510	0	0	0		177448	0	510	0	510	0	510	0	510	0	510	0	510	0	510	0	510	0	510	0	510	510	0	0	0
177558	0	510	0	510	0	510	0	510	0	510	0	510	0	510	0	510	0	510	510	0	0	0		177558	0	510	0	510	0	510	0	510	0	510	0	510	0	510	0	510	0	510	0	510	510	0	0	0
177669	0	510	0	510	0	510	0	510	0	510	0	510	0	510	0	510	0	510	510	0	0	0		177669	0	510	0	510	0	510	0	510	0	510	0	510	0	510	0	510	0	510	0	510	510	0	0	0
177780	0	510	0	510	0	510	0	510	0	510	0	510	0	510	0	510	0	510	510	0	0	0		177780	0	510	0	510	0	510	0	510	0	510	0	510	0	510	0	510	0	510	0	510	510	0	0	0
177891	0	510	0	510	0	510	0	510	0	510	0	510	0	510	0	510	0	510	510	0	0	0		177891	0	510	0	510	0	510	0	510	0	510	0	510	0	510	0	510	0	510	0	510	510	0	0	0
178002	0	510	0	510	0	510	0	510	0	510	0	510	0	510	0	510	0	510	510	0	0	0		178002	0	510	0	510	0	510	0	510	0	510	0	510	0	510	0	510	0	510	0	510	510	0	0	0
178112	0	510	0	510	0	510	0	510	0	510	0	510	0	510	0	510	0	510	510	0	0	0		178112	0	510	0	510	0	510	0	510	0	510	0	510	0	510	0	510	0	510	0	510	510	0	0	0
178223	0	510	0	510	0	510	0	510	0	510	0	510	0	510	0	510	0	510	510	0	0	0		178223	0	510	0	510	0	510	0	510	0	510	0	510	0	510	0	510	0	510	0	510	510	0	0	0
178334	0	510	0	510	0	510	0	510	0	510	0	510	0	510	0	510	0	510	510	0	0	0		178334	0	510	0	510	0	510	0	510	0	510	0	510	0	510	0	510	0	510	0	510	510	0	0	0
178445	0	510	0	510	0	510	0	510	0	510	0	510	0	510	0	510	0	510	510	0	0	0		178445	0	510	0	510	0	510	0	510	0	510	0	510	0	510	0	510	0	510	0	510	510	0	0	0
178555	0	510	0	510	0	510	0	510	0	510	0	510	0	510	0	510	0	510	510	0	0	0		178555	0	510	0	510	0	510	0	510	0	510	0	510	0	510	0	510	0	510	0	510	510	0	0	0
178666	0	510	0	510	0	510	0	510	0	510	0	510	0	510	0	510	0	510	510	0	0	0		178666	0	510	0	510	0	510	0	510	0	510	0	510	0	510	0	510	0	510	0	510	510	0	0	0
178777	0	510	0	510	0	510	0	510	0	510	0	510	0	510	0	510	0	510	510	0	0	0		178777	0	510	0	510	0	510	0	510	0	510	0	510	0	510	0	510	0	510	0	510	510	0	0	0
178888	0	510	0	510	0	510	0	510	0	510	0	510	0	510	0	510	0	510	510	0	0	0		178888	0	510	0	510	0	510	0	510	0	510	0	510	0	510	0	510	0	510	0	510	510	0	0	0
178998	0	510	0	510	0	510	0	510	0	510	0	510	0	510	0	510	0	510	510	0	0	0		178998	0	510	0	510	0	510	0	510	0	510	0	510	0	510	0	510	0	510	0	510	510	0	0	0
179109	0	510	0	510	0	510	0	510	0	510	0	510	0	510	0	510	0	510	510	0	0	0		179109	0	510	0	510	0	510	0	510	0	510	0	510	0	510	0	510	0	510	0	510	510	0	0	0
179220	0	510	0	510	0	510	0	510	0	510	0	510	0	510	0	510	0	510	510	0	0	0		179220	0	510	0	510	0	510	0	510	0	510	0	510	0	510	0	510	0	510	0	510	510	0	0	0
179331	0	510	0	510	0	510	0	510	0	510	0	510	0	510	0	510	0	510	510	0	0	0		179331	0	510	0	510	0	510	0	510	0	510	0	510	0	510	0	510	0	510	0	510	510	0	0	0
179441	0	510	0	510	0	510	0	510	0	510	0	510	0	510	0	510	0	510	510	0	0	0		179441	0	510	0	510	0	510	0	510	0	510	0	510	0	510	0	510	0	510	0	510	510	0	0	0
179552	0	510	0	510	0	510	0	510	0	510	0	510	0	510	0	510	0	510	510	0	0	0		179552	0	510	0	510	0	510	0	510	0	510	0	510	0	510	0	510	0	510	0	510	510	0	0	0
179663	0	510	0	510	0	510	0	510	0	510	0	510	0	510	0	510	0	510	510	0	0	0		179663	0	510	0	510	0	510	0	510	0	510	0	510	0	510	0	510	0	510	0	510	510	0	0	0
179774	0	510	0	510	0	510	0	510	0	510	0	510	0	510	0	510	0	510	510	0	0	0		179774	0	510	0	510	0	510	0	510	0	510	0	510	0	510	0	510	0	510	0	510	510	0	0	0
179885	0	510	0	510	0	510	0	510	0	510	0	510	0	510	0	510	0	510	510	0	0	0		179885	0	510	0	510	0	510	0	510	0	510	0	510	0	510	0	510	0	510	0	510	510	0	0	0
179995	0	510	0	510	0	510	0	510	0	510	0	510	0	510	0	510	0	510	510	0	0	0		179995	0	510	0	510	0	510	0	510	0	510	0	510	0	510	0	510	0	510	0	510	510	0	0	0
180106	0	510	0	510	0	510	0	510	0	510	0	510	0	510	0	510	0	510	510	0	0	0		180106	0	510	0	510	0	510	0	510	0	510	0	510	0	510	0	510	0	510	0	510	510	0	0	0
180217	0	510	0	510	0	510	0	510	0	510	0	510	0	510	0	510	0	510	510	0	0	0		180217	0	510	0	510	0	510	0	510	0	510	0	510	0	510	0	510	0	510	0	510	510	0	0	0
180328	0	510	0	510	0	510	0	510	0	510	0	510	0	510	0	510	0	510	510	0	0	0		180328	0	510	0	510	0	510	0	510	0	510	0	510	0	510	0	510	0	510	0	510	510	0	0	0
180438	0	510	0	510	0	510	0	510	0	510	0	510	0	510	0	510	0	510	510	0	0	0		180438	0	510	0	510	0	510	0	510	0	510	0	510	0	510	0	510	0	510	0	510	510	0	0	0
180549	0	510	0	510	0	510	0	510	0	510	0	510	0	510	0	510	0	510	510	0	0	0		180549	0	510	0	510	0	510	0	510	0	510	0	510	0	510	0	510	0	510	0	510	510	0	0	0
180660	0	510	0	510	0	510	0	510	0	510	0	510	0	510	0	510	0	510	510	0	0	0		180660	0	510	0	510	0	510	0	510	0	510	0	510	0	510	0	510	0	510	0	510	510	0	0	0
180771	0	510	0	510	0	510	0	510	0	510	0	510	0	510	0	510	0	510	510	0	0	0		180771	0	510	0	510	0	510	0	510	0	510	0	510	0	510	0	510	0	510	0	510	510	0	0	0
180881	0	510	0	510	0	510	0	510	0	510	0	510	0	510	0	510	0	510	510	0	0	0		180881	0	510	0	510	0	510	0	510	0	510	0	510	0	510	0	510	0	510	0	510	510	0	0	0
180992	0	510	0	510	0	510	0	510	0	510	0	510	0	510	0	510	0	510	510	0	0	0		180992	0	510	0	510	0	510	0	510	0	510	0	510	0	510	0	510	0	510	0	510	510	0	0	0
181103	0	510	0	510	0	510	0	510	0	510	0	510	0	510	0	510	0	510	510	0	0	0		181103	0	510	0	510	0	510	0	510	0	510	0	510	0	510	0	510	0	510	0	510	510	0	0	0
181214	0	510	0	510	0	510	0	510	0	510	0	510	0	510	0	510	0	510	510	0	0	0		181214	0	510	0	510	0	510	0	510	0	510	0	510	0	510	0	510	0	510	0	510	510	0	0	0
181325	0	510	0	510	0	510	0	510	0	510	0	510	0	510	0	510	0	510	510	0	0	0		181325	0	510	0	510	0	510	0	510	0	510	0	510	0	510	0	510	0	510	0	510	510	0	0	0
181435	0	510	0	510	0	510	0	510	0	510	0	510	0	510	0	510	0	510	510	0	0	0		181435	0	510	0	510	0	510	0	510	0	510	0	510	0	510	0	510	0	510	0	510	510	0	0	0
181546	0	510	0	510	0	510	0	510	0	510	0	510	0	510	0	510	0	510	510	0	0	0		181546	0	510	0	510	0	510	0	510	0	510	0	510	0	510	0	510	0	510	0	510	510	0	0	0
181657	0	510	0	510	0	510	0	510	0	510	0	510	0	510	0	510	0	510	510	0	0	0		181657	0	510	0	510	0	510	0	510	0	510	0	510	0	510	0	510	0	510	0	510	510	0	0	0
181768	0	510	0	510	0	510	0	510	0	510	0	510	0	510	0	510	0	510	510	0	0	0		181768	0	510	0	510	0	510	0	510	0	510	0	510	0	510	0	510	0	510	0	510	510	0	0	0
181878	0	510	0	510	0	510	0	510	0	510	0	510	0	510	0	510	0	510	510	0	0	0		181878	0	510	0	510	0	510	0	510	0	510	0	510	0	510	0	510	0	510	0	510	510	0	0	0
181989	0	510	0	510	0	510	0	510	0	510	0	510	0	510	0	510	0	510	510	0	0	0		181989	0	510	0	510	0	510	0	510	0	510	0	510	0	510	0	510	0	510	0	510	510	0	0	0
182100	0	510	0	510	0	510	0	510	0	510	0	510	0	510	0	510	0	510	510	0	0	0		182100	0	510	0	510	0	510	0	510	0	510	0	510	0	510	0	510	0	510	0	510	510	0	0	0
182211	0	510	0	510	0	510	0	510	0	510	0	510	0	510	0	510	0	510	510	0	0	0		182211	0	510	0	510	0	510	0	510	0	510	0	510	0	510	0	510	0	510	0	510	510	0	0	0
182321	0	510	0	510	0	510	0	510	0	510	0	510	0	510	0	510	0	510	510	0	0	0		182321	0	510	0	510	0	510	0	510	0	510	0	510	0	510	0	510	0	510	0	510	510	0	0	0
182432	0	510	0	510	0	510	0	510	0	510	0	510	0	510	0	510	0	510	510	0	0	0		182432	0	510	0	510	0	510	0	510	0	510	0	510	0	510	0	510	0	510	0	510	510	0	0	0
182543	0	510	0	510	0	510	0	510	0	510	0	510	0	510	0	510	0	510	510	0	0	0		182543	0	510	0	510	0	510	0	510	0	510	0	510	0	510	0	510	0	510	0	510	510	0	0	0
182654	0	510	0	510	0	510	0	510	0	510	0	510	0	510	0	510	0	510	510	0	0	0		182654	0	510	0	510	0	510	0	510	0	510	0	510	0	510	0	510	0	510	0	510	510	0	0	0
182764	0	510	0	510	0	510	0	510	0	510	0	510	0	510	0	510	0	510	510	0	0	0		182764	0	510	0	510	0	510	0	510	0	510	0	510	0	510	0	510	0	510	0	510	510	0	0	0
182875	0	510	0	510	0	510	0	510	0	510	0	510	0	510	0	510	0	510	510	0	0	0		182875	0	510	0	510	0	510	0	510	0	510	0	510	0	510	0	510	0	510	0	510	510	0	0	0
182986	0	510	0	510	0	510	0	510	0	510	0	510	0	510	0	510	0	510	510	0	0	0		182986	0	510	0	510	0	510	0	510	0	510	0	510	0	510	0	510	0	510	0	510	510	0	0	0
183097	0	510	0	510	0	510	0	510	0	510	0	510	0	510	0	510	0	510	510	0	0	0		183097	0	510	0	510	0	510	0	510	0	510	0	510	0	510	0	510	0	510	0	510	510	0	0	0
183208	0	510	0	510	0	510	0	510	0	510	0	510	0	510	0	510	0	510	510	0	0	0		183208	0	510	0	510	0	510	0	510	0	510	0	510	0	510	0	510	0	510	0	510	510	0	0	0
183318	0	510	0	510	0	510	0	510	0	510	0	510	0	510	0	510	0	510	510	0	0	0		183318	0	510	0	510	0	510	0	510	0	510	0	510	0	510	0	510	0	510	0	510	510	0	0	0
183429	0	510	0	510	0	510	0	510	0	510	0	510	0	510	0	510	0	510	510	0	0	0		183429	0	510	0	510	0	510	0	510	0	510	0	510	0	510	0	510	0	510	0	510	510	0	0	0
183540	0	510	0	510	0	510	0	510	0	510	0	510	0	510	0	510	0	510	510	0	0	0		183540	0	510	0	510	0	510	0	510	0	510	0	510	0	510	0	510	0	510	0	510	510	0	0	0
183651	0	510	0	510	0	510	0	510	0	510	0	510	0	510	0	510	0	510	510	0	0	0		183651	0	510	0	510	0	510	0	510	0	510	0	510	0	510	0	510	0	510	0	510	510	0	0	0
183761	0	510	0	510	0	510	0	510	0	510	0	510	0	510	0	510	0	510	510	0	0	0		183761	0	510	0	510	0	510	0	510	0	510	0	510	0	510	0	510	0	510	0	510	510	0	0	0
183872	0	510	0	510	0	510	0	510	0	510	0	510	0	510	0	510	0	510	510	0	0	0		183872	0	510	0	510	0	510	0	510	0	510	0	510	0	510	0	510	0	510	0	510	510	0	0	0
183983	0	510	0	510	0	510	0	510	0	510	0	510	0	510	0	510	0	510	510	0	0	0		183983	0	510	0	510	0	510	0	510	0	510	0	510	0	510	0	510	0	510	0	510	510	0	0	0
184094	0	510	0	510	0	510	0	510	0	510	0	510	0	510	0	510	0	510	510	0	0	0		184094	0	510	0	510	0	510	0	510	0	510	0	510	0	510	0	510	0	510	0	510	510	0	0	0
184204	0	510	0	510	0	510	0	510	0	510	0	510	0	510	0	510	0	510	510	0	0	0		184204	0	510	0	510	0	510	0	510	0	510	0	510	0	510	0	510	0	510	0	510	510	0	0	0
184315	0	510	0	510	0	510	0	510	0	510	0	510	0	510	0	510	0	510	510	0	0	0		184315	0	510	0	510	0	510	0	510	0	510	0	510	0	510	0	510	0	510	0	510	510	0	0	0
184426	0	510	0	510	0	510	0	510	0	510	0	510	0	510	0	510	0	510	510	0	0	0		184426	0	510	0	510	0	510	0	510	0	510	0	510	0	510	0	510	0	510	0	510	510	0	0	0
184537	0	510	0	510	0	510	0	510	0	510	0	510	0	510	0	510	0	510	510	0	0	0		184537	0	510	0	510	0	510	0	510	0	510	0	510	0	510	0	510	0	510	0	510	510	0	0	0
184648	0	510	0	510	0	510	0	510	0	510	0	510	0	510	0	510	0	510	510	0	0	0		184648	0	510	0	510	0	510	0	510	0	510	0	510	0	510	0	510	0	510	0	510	510	0	0	0
184758	0	510	0	510	0	510	0	510	0	510	0	510	0	510	0	510	0	510	510	0	0	0		184758	0	510	0	510	0	510	0	510	0	510	0	510	0	510	0	510	0	510	0	510	510	0	0	0
184869	0	510	0	510	0	510	0	510	0	510	0	510	0	510	0	510	0	510	510	0	0	0		184869	0	510	0	510	0	510	0	510	0	510	0	510	0	510	0	510	0	510	0	510	510	0	0	0
184980	0	510	0	510	0	510	0	510	0	510	0	510	0	510	0	510	0	510	510	0	0	0		184980	0	510	0	510	0	510	0	510	0	510	0	510	0	510	0	510	0	510	0	510	510	0	0	0
185091	0	510	0	510	0	510	0	510	0	510	0	510	0	510	0	510	0	510	510	0	0	0		185091	0	510	0	510	0	510	0	510	0	510	0	510	0	510	0	510	0	510	0	510	510	0	0	0
185201	0	510	0	510	0	510	0	510	0	510	0	510	0	510	0	510	0	510	510	0	0	0		185201	0	510	0	510	0	510	0	510	0	510	0	510	0	510	0	510	0	510	0	510	510	0	0	0
185312	0	510	0	510	0	510	0	510	0	510	0	510	0	510	0	510	0	510	510	0	0	0		185312	0	510	0	510	0	510	0	510	0	510	0	510	0	510	0	510	0	510	0	510	510	0	0	0
185423	0	510	0	510	0	510	0	510	0	510	0	510	0	510	0	510	0	510	510	0	0	0		185423	0	510	0	510	0	510	0	510	0	510	0	510	0	510	0	510	0	510	0	510	510	0	0	0
185534	0	510	0	510	0	510	0	510	0	510	0	510	0	510	0	510	0	510	510	0	0	0		185534	0	510	0	510	0	510	0	510	0	510	0	510	0	510	0	510	0	510	0	510	510	0	0	0
185644	0	510	0	510	0	510	0	510	0	510	0	510	0	510	0	510	0	510	510	0	0	0		185644	0	510	0	510	0	510	0	510	0	510	0	510	0	510	0	510	0	510	0	510	510	0	0	0
185755	0	510	0	510	0	510	0	510	0	510	0	510	0	510	0	510	0	510	510	0	0	0		185755	0	510	0	510	0	510	0	510	0	510	0	510	0	510	0	510	0	510	0	510	510	0	0	0
185866	0	510	0	510	0	510	0	510	0	510	0	510	0	510	0	510	0	510	510	0	0	0		185866	0	510	0	510	0	510	0	510	0	510	0	510	0	510	0	510	0	510	0	510	510	0	0	0
185977	0	510	0	510	0	510	0	510	0	510	0	510	0	510	0	510	0	510	510	0	0	0		185977	0	510	0	510	0	510	0	510	0	510	0	510	0	510	0	510	0	510	0	510	510	0	0	0
186087	0	510	0	510	0	510	0	510	0	510	0	510	0	510	0	510	0	510	510	0	0	0		186087	0	510	0	510	0	510	0	510	0	510	0	510	0	510	0	510	0	510	0	510	510	0	0	0
186198	0	510	0	510	0	510	0	510	0	510	0	510	0	510	0	510	0	510	510	0	0	0		186198	0	510	0	510	0	510	0	510	0	510	0	510	0	510	0	510	0	510	0	510	510	0	0	0
186309	0	510	0	510	0	510	0	510	0	510	0	510	0	510	0	510	0	510	510	0	0	0		186309	0	510	0	510	0	510	0	510	0	510	0	510	0	510	0	510	0	510	0	510	510	0	0	0
186420	0	510	0	510	0	510	0	510	0	510	0	510	0	510	0	510	0	510	510	0	0	0		186420	0	510	0	510	0	510	0	510	0	510	0	510	0	510	0	510	0	510	0	510	510	0	0	0
186531	0	510	0	510	0	510	0	510	0	510	0	510	0	510	0	510	0	510	510	0	0	0		186531	0	510	0	510	0	510	0	510	0	510	0	510	0	510	0	510	0	510	0	510	510	0	0	0
186641	0	510	0	510	0	510	0	510	0	510	0	510	0	510	0	510	0	510	510	0	0	0		186641	0	510	0	510	0	510	0	510	0	510	0	510	0	510	0	510	0	510	0	510	510	0	0	0
186752	0	510	0	510	0	510	0	510	0	510	0	510	0	510	0	510	0	510	510	0	0	0		186752	0	510	0	510	0	510	0	510	0	510	0	510	0	510	0	510	0	510	0	510	510	0	0	0
186863	0	510	0	510	0	510	0	510	0	510	0	510	0	510	0	510	0	510	510	0	0	0		186863	0	510	0	510	0	510	0	510	0	510	0	510	0	510	0	510	0	510	0	510	510	0	0	0
186974	0	510	0	510	0	510	0	510	0	510	0	510	0	510	0	510	0	510	510	0	0	0		186974	0	510	0	510	0	510	0	510	0	510	0	510	0	510	0	510	0	510	0	510	510	0	0	0
187084	0	510	0	510	0	510	0	510	0	510	0	510	0	510	0	510	0	510	510	0	0	0		187084	0	510	0	510	0	510	0	510	0	510	0	510	0	510	0	510	0	510	0	510	510	0	0	0
187195	0	510	0	510	0	510	0	510	0	510	0	510	0	510	0	510	0	510	510	0	0	0		187195	0	510	0	510	0	510	0	510	0	510	0	510	0	510	0	510	0	510	0	510	510	0	0	0
187306	0	510	0	510	0	510	0	510	0	510	0	510	0	510	0	510	0	510	510	0	0	0		187306	0	510	0	510	0	510	0	510	0	510	0	510	0	510	0	510	0	510	0	510	510	0	0	0
187417	0	510	0	510	0	510	0	510	0	510	0	510	0	510	0	510	0	510	510	0	0	0		187417	0	510	0	510	0	510	0	510	0	510	0	510	0	510	0	510	0	510	0	510	510	0	0	0
187527	0	510	0	510	0	510	0	510	0	510	0	510	0	510	0	510	0	510	510	0	0	0		187527	0	510	0	510	0	510	0	510	0	510	0	510	0	510	0	510	0	510	0	510	510	0	0	0
187638	0	510	0	510	0	510	0	510	0	510	0	510	0	510	0	510	0	510	510	0	0	0		187638	0	510	0	510	0	510	0	510	0	510	0	510	0	510	0	510	0	510	0	510	510	0	0	0
187749	0	510	0	510	0	510	0	510	0	510	0	510	0	510	0	510	0	510	510	0	0	0		187749	0	510	0	510	0	510	0	510	0	510	0	510	0	510	0	510	0	510	0	510	510	0	0	0
187860	0	510	0	510	0	510	0	510	0	510	0	510	0	510	0	510	0	510	510	0	0	0		187860	0	510	0	510	0	510	0	510	0	510	0	510	0	510	0	510	0	510	0	510	510	0	0	0
187971	0	510	0	510	0	510	0	510	0	510	0	510	0	510	0	510	0	510	510	0	0	0		187971	0	510	0	510	0	510	0	510	0	510	0	510	0	510	0	510	0	510	0	510	510	0	0	0
188081	0	510	0	510	0	510	0	510	0	510	0	510	0	510	0	510	0	510	510	0	0	0		188081	0	510	0	510	0	510	0	510	0	510	0	510	0	510	0	510	0	510	0	510	510	0	0	0
188192	0	510	0	510	0	510	0	510	0	510	0	510	0	510	0	510	0	510	510	0	0	0		188192	0	510	0	510	0	510	0	510	0	510	0	510	0	510	0	510	0	510	0	510	510	0	0	0
188303	0	510	0	510	0	510	0	510	0	510	0	510	0	510	0	510	0	510	510	0	0	0		188303	0	510	0	510	0	510	0	510	0	510	0	510	0	510	0	510	0	510	0	510	510	0	0	0
188414	0	510	0	510	0	510	0	510	0	510	0	510	0	510	0	510	0	510	510	0	0	0		188414	0	510	0	510	0	510	0	510	0	510	0	510	0	510	0	510	0	510	0	510	510	0	0	0
188524	0	510	0	510	0	510	0	510	0	510	0	510	0	510	0	510	0	510	510	0	0	0		188524	0	510	0	510	0	510	0	510	0	510	0	510	0	510	0	510	0	510	0	510	510	0	0	0
188635	0	510	0	510	0	510	0	510	0	510	0	510	0	510	0	510	0	510	510	0	0	0		188635	0	510	0	510	0	510	0	510	0	510	0	510	0	510	0	510	0	510	0	510	510	0	0	0
188746	0	510	0	510	0	510	0	510	0	510	0	510	0	510	0	510	0	510	510	0	0	0		188746	0	510	0	510	0	510	0	510	0	510	0	510	0	510	0	510	0	510	0	510	510	0	0	0
188857	0	510	0	510	0	510	0	510	0	510	0	510	0	510	0	510	0	510	510	0	0	0		188857	0	510	0	510	0	510	0	510	0	510	0	510	0	510	0	510	0	510	0	510	510	0	0	0
188967	0	510	0	510	0	510	0	510	0	510	0	510	0	510	0	510	0	510	510	0	0	0		188967	0	510	0	510	0	510	0	510	0	510	0	510	0	510	0	510	0	510	0	510	510	0	0	0
189078	0	510	0	510	0	510	0	510	0	510	0	510	0	510	0	510	0	510	510	0	0	0		189078	0	510	0	510	0	510	0	510	0	510	0	510	0	510	0	510	0	510	0	510	510	0	0	0
189189	0	510	0	510	0	510	0	510	0	510	0	510	0	510	0	510	0	510	510	0	0	0		189189	0	510	0	510	0	510	0	510	0	510	0	510	0	510	0	510	0	510	0	510	510	0	0	0
189300	0	510	0	510	0	510	0	510	0	510	0	510	0	510	0	510	0	510	510	0	0	0		189300	0	510	0	510	0	510	0	510	0	510	0	510	0	510	0	510	0	510	0	510	510	0	0	0
189410	0	510	0	510	0	510	0	510	0	510	0	510	0	510	0	510	0	510	510	0	0	0		189410	0	510	0	510	0	510	0	510	0	510	0	510	0	510	0	510	0	510	0	510	510	0	0	0
189521	0	510	0	510	0	510	0	510	0	510	0	510	0	510	0	510	0	510	510	0	0	0		189521	0	510	0	510	0	510	0	510	0	510	0	510	0	510	0	510	0	510	0	510	510	0	0	0
189632	0	510	0	510	0	510	0	510	0	510	0	510	0	510	0	510	0	510	510	0	0	0		189632	0	510	0	510	0	510	0	510	0	510	0	510	0	510	0	510	0	510	0	510	510	0	0	0
189743	0	510	0	510	0	510	0	510	0	510	0	510	0	510	0	510	0	510	510	0	0	0		189743	0	510	0	510	0	510	0	510	0	510	0	510	0	510	0	510	0	510	0	510	510	0	0	0
189854	0	510	0	510	0	510	0	510	0	510	0	510	0	510	0	510	0	510	510	0	0	0		189854	0	510	0	510	0	510	0	510	0	510	0	510	0	510	0	510	0	510	0	510	510	0	0	0
189964	0	510	0	510	0	510	0	510	0	510	0	510	0	510	0	510	0	510	510	0	0	0		189964	0	510	0	510	0	510	0	510	0	510	0	510	0	510	0	510	0	510	0	510	510	0	0	0
190075	0	510	0	510	0	510	0	510	0	510	0	510	0	510	0	510	0	510	510	0	0	0		190075	0	510	0	510	0	510	0	510	0	510	0	510	0	510	0	510	0	510	0	510	510	0	0	0
190186	0	510	0	510	0	510	0	510	0	510	0	510	0	510	0	510	0	510	510	0	0	0		190186	0	510	0	510	0	510	0	510	0	510	0	510	0	510	0	510	0	510	0	510	510	0	0	0
190297	0	510	0	510	0	510	0	510	0	510	0	510	0	510	0	510	0	510	510	0	0	0		190297	0	510	0	510	0	510	0	510	0	510	0	510	0	510	0	510	0	510	0	510	510	0	0	0
190407	0	510	0	510	0	510	0	510	0	510	0	510	0	510	0	510	0	510	510	0	0	0		190407	0	510	0	510	0	510	0	510	0	510	0	510	0	510	0	510	0	510	0	510	510	0	0	0
190518	0	510	0	510	0	510	0	510	0	510	0	510	0	510	0	510	0	510	510	0	0	0		190518	0	510	0	510	0	510	0	510	0	510	0	510	0	510	0	510	0	510	0	510	510	0	0	0
190629	0	510	0	510	0	510	0	510	0	510	0	510	0	510	0	510	0	510	510	0	0	0		190629	0	510	0	510	0	510	0	510	0	510	0	510	0	510	0	510	0	510	0	510	510	0	0	0
190740	0	510	0	510	0	510	0	510	0	510	0	510	0	510	0	510	0	510	510	0	0	0		190740	0	510	0	510	0	510	0	510	0	510	0	510	0	510	0	510	0	510	0	510	510	0	0	0
190850	0	510	0	510	0	510	0	510	0	510	0	510	0	510	0	510	0	510	510	0	0	0		190850	0	510	0	510	0	510	0	510	0	510	0	510	0	510	0	510	0	510	0	510	510	0	0	0
190961	0	510	0	510	0	510	0	510	0	510	0	510	0	510	0	510	0	510	510	0	0	0		190961	0	510	0	510	0	510	0	510	0	510	0	510	0	510	0	510	0	510	0	510	510	0	0	0
191072	0	510	0	510	0	510	0	510	0	510	0	510	0	510	0	510	0	510	510	0	0	0		191072	0	510	0	510	0	510	0	510	0	510	0	510	0	510	0	510	0	510	0	510	510	0	0	0
191183	0	510	0	510	0	510	0	510	0	510	0	510	0	510	0	510	0	510	510	0	0	0		191183	0	510	0	510	0	510	0	510	0	510	0	510	0	510	0	510	0	510	0	510	510	0	0	0
191293	0	510	0	510	0	510	0	510	0	510	0	510	0	510	0	510	0	510	510	0	0	0		191293	0	510	0	510	0	510	0	510	0	510	0	510	0	510	0	510	0	510	0	510	510	0	0	0
191404	0	510	0	510	0	510	0	510	0	510	0	510	0	510	0	510	0	510	510	0	0	0		191404	0	510	0	510	0	510	0	510	0	510	0	510	0	510	0	510	0	510	0	510	510	0	0	0
191515	0	510	0	510	0	510	0	510	0	510	0	510	0	510	0	510	0	510	510	0	0	0		191515	0	510	0	510	0	510	0	510	0	510	0	510	0	510	0	510	0	510	0	510	510	0	0	0
191626	0	510	0	510	0	510	0	510	0	510	0	510	0	510	0	510	0	510	510	0	0	0		191626	0	510	0	510	0	510	0	510	0	510	0	510	0	510	0	510	0	510	0	510	510	0	0	0
191737	0	510	0	510	0	510	0	510	0	510	0	510	0	510	0	510	0	510	510	0	0	0		191737	0	510	0	510	0	510	0	510	0	510	0	510	0	510	0	510	0	510	0	510	510	0	0	0
191847	0	510	0	510	0	510	0	510	0	510	0	510	0	510	0	510	0	510	510	0	0	0		191847	0	510	0	510	0	510	0	510	0	510	0	510	0	510	0	510	0	510	0	510	510	0	0	0
191958	0	510	0	510	0	510	0	510	0	510	0	510	0	510	0	510	0	510	510	0	0	0		191958	0	510	0	510	0	510	0	510	0	510	0	510	0	510	0	510	0	510	0	510	510	0	0	0
192069	0	510	0	510	0	510	0	510	0	510	0	510	0	510	0	510	0	510	510	0	0	0		192069	0	510	0	510	0	510	0	510	0	510	0	510	0	510	0	510	0	510	0	510	510	0	0	0
192180	0	510	0	510	0	510	0	510	0	510	0	510	0	510	0	510	0	510	510	0	0	0		192180	0	510	0	510	0	510	0	510	0	510	0	510	0	510	0	510	0	510	0	510	510	0	0	0
192290	0	510	0	510	0	510	0	510	0	510	0	510	0	510	0	510	0	510	510	0	0	0		192290	0	510	0	510	0	510	0	510	0	510	0	510	0	510	0	510	0	510	0	510	510	0	0	0
192401	0	510	0	510	0	510	0	510	0	510	0	510	0	510	0	510	0	510	510	0	0	0		192401	0	510	0	510	0	510	0	510	0	510	0	510	0	510	0	510	0	510	0	510	510	0	0	0
192512	0	510	0	510	0	510	0	510	0	510	0	510	0	510	0	510	0	510	510	0	0	0		192512	0	510	0	510	0	510	0	510	0	510	0	510	0	510	0	510	0	510	0	510	510	0	0	0
192623	0	510	0	510	0	510	0	510	0	510	0	510	0	510	0	510	0	510	510	0	0	0		192623	0	510	0	510	0	510	0	510	0	510	0	510	0	510	0	510	0	510	0	510	510	0	0	0
192733	0	510	0	510	0	510	0	510	0	510	0	510	0	510	0	510	0	510	510	0	0	0		192733	0	510	0	510	0	510	0	510	0	510	0	510	0	510	0	510	0	510	0	510	510	0	0	0
192844	0	510	0	510	0	510	0	510	0	510	0	510	0	510	0	510	0	510	510	0	0	0		192844	0	510	0	510	0	510	0	510	0	510	0	510	0	510	0	510	0	510	0	510	510	0	0	0
192955	0	510	0	510	0	510	0	510	0	510	0	510	0	510	0	510	0	510	510	0	0	0		192955	0	510	0	510	0	510	0	510	0	510	0	510	0	510	0	510	0	510	0	510	510	0	0	0
193066	0	510	0	510	0	510	0	510	0	510	0	510	0	510	0	510	0	510	510	0	0	0		193066	0	510	0	510	0	510	0	510	0	510	0	510	0	510	0	510	0	510	0	510	510	0	0	0
193177	0	510	0	510	0	510	0	510	0	510	0	510	0	510	0	510	0	510	510	0	0	0		193177	0	510	0	510	0	510	0	510	0	510	0	510	0	510	0	510	0	510	0	510	510	0	0	0
193287	0	510	0	510	0	510	0	510	0	510	0	510	0	510	0	510	0	510	510	0	0	0		193287	0	510	0	510	0	510	0	510	0	510	0	510	0	510	0	510	0	510	0	510	510	0	0	0
193398	0	510	0	510	0	510	0	510	0	510	0	510	0	510	0	510	0	510	510	0	0	0		193398	0	510	0	510	0	510	0	510	0	510	0	510	0	510	0	510	0	510	0	510	510	0	0	0
193509	0	510	0	510	0	510	0	510	0	510	0	510	0	510	0	510	0	510	510	0	0	0		193509	0	510	0	510	0	510	0	510	0	510	0	510	0	510	0	510	0	510	0	510	510	0	0	0
193620	0	510	0	510	0	510	0	510	0	510	0	510	0	510	0	510	0	510	510	0	0	0		193620	0	510	0	510	0	510	0	510	0	510	0	510	0	510	0	510	0	510	0	510	510	0	0	0
193730	0	510	0	510	0	510	0	510	0	510	0	510	0	510	0	510	0	510	510	0	0	0		193730	0	510	0	510	0	510	0	510	0	510	0	510	0	510	0	510	0	510	0	510	510	0	0	0
193841	0	510	0	510	0	510	0	510	0	510	0	510	0	510	0	510	0	510	510	0	0	0		193841	0	510	0	510	0	510	0	510	0	510	0	510	0	510	0	510	0	510	0	510	510	0	0	0
193952	0	510	0	510	0	510	0	510	0	510	0	510	0	510	0	510	0	510	510	0	0	0		193952	0	510	0	510	0	510	0	510	0	510	0	510	0	510	0	510	0	510	0	510	510	0	0	0
194063	0	510	0	510	0	510	0	510	0	510	0	510	0	510	0	510	0	510	510	0	0	0		194063	0	510	0	510	0	510	0	510	0	510	0	510	0	510	0	510	0	510	0	510	510	0	0	0
194173	0	510	0	510	0	510	0	510	0	510	0	510	0	510	0	510	0	510	510	0	0	0		194173	0	510	0	510	0	510	0	510	0	510	0	510	0	510	0	510	0	510	0	510	510	0	0	0
194284	0	510	0	510	0	510	0	510	0	510	0	510	0	510	0	510	0	510	510	0	0	0		194284	0	510	0	510	0	510	0	510	0	510	0	510	0	510	0	510	0	510	0	510	510	0	0	0
194395	0	510	0	510	0	510	0	510	0	510	0	510	0	510	0	510	0	510	510	0	0	0		194395	0	510	0	510	0	510	0	510	0	510	0	510	0	510	0	510	0	510	0	510	510	0	0	0
194506	0	510	0	510	0	510	0	510	0	510	0	510	0	510	0	510	0	510	510	0	0	0		194506	0	510	0	510	0	510	0	510	0	510	0	510	0	510	0	510	0	510	0	510	510	0	0	0
194616	0	510	0	510	0	510	0	510	0	510	0	510	0	510	0	510	0	510	510	0	0	0		194616	0	510	0	510	0	510	0	510	0	510	0	510	0	510	0	510	0	510	0	510	510	0	0	0
194727	0	510	0	510	0	510	0	510	0	510	0	510	0	510	0	510	0	510	510	0	0	0		194727	0	510	0	510	0	510	0	510	0	510	0	510	0	510	0	510	0	510	0	510	510	0	0	0
194838	0	510	0	510	0	510	0	510	0	510	0	510	0	510	0	510	0	510	510	0	0	0		194838	0	510	0	510	0	510	0	510	0	510	0	510	0	510	0	510	0	510	0	510	510	0	0	0
194949	0	510	0	510	0	510	0	510	0	510	0	510	0	510	0	510	0	510	510	0	0	0		194949	0	510	0	510	0	510	0	510	0	510	0	510	0	510	0	510	0	510	0	510	510	0	0	0
195060	0	510	0	510	0	510	0	510	0	510	0	510	0	510	0	510	0	510	510	0	0	0		195060	0	510	0	510	0	510	0	510	0	510	0	510	0	510	0	510	0	510	0	510	510	0	0	0
195170	0	510	0	510	0	510	0	510	0	510	0	510	0	510	0	510	0	510	510	0	0	0		195170	0	510	0	510	0	510	0	510	0	510	0	510	0	510	0	510	0	510	0	510	510	0	0	0
195281	0	510	0	510	0	510	0	510	0	510	0	510	0	510	0	510	0	510	510	0	0	0		195281	0	510	0	510	0	510	0	510	0	510	0	510	0	510	0	510	0	510	0	510	510	0	0	0
195392	0	510	0	510	0	510	0	510	0	510	0	510	0	510	0	510	0	510	510	0	0	0		195392	0	510	0	510	0	510	0	510	0	510	0	510	0	510	0	510	0	510	0	510	510	0	0	0
195503	0	510	0	510	0	510	0	510	0	510	0	510	0	510	0	510	0	510	510	0	0	0		195503	0	510	0	510	0	510	0	510	0	510	0	510	0	510	0	510	0	510	0	510	510	0	0	0
195613	0	510	0	510	0	510	0	510	0	510	0	510	0	510	0	510	0	510	510	0	0	0		195613	0	510	0	510	0	510	0	510	0	510	0	510	0	510	0	510	0	510	0	510	510	0	0	0
195724	0	510	0	510	0	510	0	510	0	510	0	510	0	510	0	510	0	510	510	0	0	0		195724	0	510	0	510	0	510	0	510	0	510	0	510	0	510	0	510	0	510	0	510	510	0	0	0
195835	0	510	0	510	0	510	0	510	0	510	0	510	0	510	0	510	0	510	510	0	0	0		195835	0	510	0	510	0	510	0	510	0	510	0	510	0	510	0	510	0	510	0	510	510	0	0	0
195946	0	510	0	510	0	510	0	510	0	510	0	510	0	510	0	510	0	510	510	0	0	0		195946	0	510	0	510	0	510	0	510	0	510	0	510	0	510	0	510	0	510	0	510	510	0	0	0
196056	0	510	0	510	0	510	0	510	0	510	0	510	0	510	0	510	0	510	510	0	0	0		196056	0	510	0	510	0	510	0	510	0	510	0	510	0	510	0	510	0	510	0	510	510	0	0	0
196167	0	510	0	510	0	510	0	510	0	510	0	510	0	510	0	510	0	510	510	0	0	0		196167	0	510	0	510	0	510	0	510	0	510	0	510	0	510	0	510	0	510	0	510	510	0	0	0
196278	0	510	0	510	0	510	0	510	0	510	0	510	0	510	0	510	0	510	510	0	0	0		196278	0	510	0	510	0	510	0	510	0	510	0	510	0	510	0	510	0	510	0	510	510	0	0	0
196389	0	510	0	510	0	510	0	510	0	510	0	510	0	510	0	510	0	510	510	0	0	0		196389	0	510	0	510	0	510	0	510	0	510	0	510	0	510	0	510	0	510	0	510	510	0	0	0
196500	0	510	0	510	0	510	0	510	0	510	0	510	0	510	0	510	0	510	510	0	0	0		196500	0	510	0	510	0	510	0	510	0	510	0	510	0	510	0	510	0	510	0	510	510	0	0	0
196610	0	510	0	510	0	510	0	510	0	510	0	510	0	510	0	510	0	510	510	0	0	0		196610	0	510	0	510	0	510	0	510	0	510	0	510	0	510	0	510	0	510	0	510	510	0	0	0
196721	0	510	0	510	0	510	0	510	0	510	0	510	0	510	0	510	0	510	510	0	0	0		196721	0	510	0	510	0	510	0	510	0	510	0	510	0	510	0	510	0	510	0	510	510	0	0	0
196832	0	510	0	510	0	510	0	510	0	510	0	510	0	510	0	510	0	510	510	0	0	0		196832	0	510	0	510	0	510	0	510	0	510	0	510	0	510	0	510	0	510	0	510	510	0	0	0
196943	0	510	0	510	0	510	0	510	0	510	0	510	0	510	0	510	0	510	510	0	0	0		196943	0	510	0	510	0	510	0	510	0	510	0	510	0	510	0	510	0	510	0	510	510	0	0	0
197053	0	510	0	510	0	510	0	510	0	510	0	510	0	510	0	510	0	510	510	0	0	0		197053	0	510	0	510	0	510	0	510	0	510	0	510	0	510	0	510	0	510	0	510	510	0	0	0
197164	0	510	0	510	0	510	0	510	0	510	0	510	0	510	0	510	0	510	510	0	0	0		197164	0	510	0	510	0	510	0	510	0	510	0	510	0	510	0	510	0	510	0	510	510	0	0	0
197275	0	510	0	510	0	510	0	510	0	510	0	510	0	510	0	510	0	510	510	0	0	0		197275	0	510	0	510	0	510	0	510	0	510	0	510	0	510	0	510	0	510	0	510	510	0	0	0
197386	0	510	0	510	0	510	0	510	0	510	0	510	0	510	0	510	0	510	510	0	0	0		197386	0	510	0	510	0	510	0	510	0	510	0	510	0	510	0	510	0	510	0	510	510	0	0	0
197496	0	510	0	510	0	510	0	510	0	510	0	510	0	510	0	510	0	510	510	0	0	0		197496	0	510	0	510	0	510	0	510	0	510	0	510	0	510	0	510	0	510	0	510	510	0	0	0
197607	0	510	0	510	0	510	0	510	0	510	0	510	0	510	0	510	0	510	510	0	0	0		197607	0	510	0	510	0	510	0	510	0	510	0	510	0	510	0	510	0	510	0	510	510	0	0	0
197718	0	510	0	510	0	510	0	510	0	510	0	510	0	510	0	510	0	510	510	0	0	0		197718	0	510	0	510	0	510	0	510	0	510	0	510	0	510	0	510	0	510	0	510	510	0	0	0
197829	0	510	0	510	0	510	0	510	0	510	0	510	0	510	0	510	0	510	510	0	0	0		197829	0	510	0	510	0	510	0	510	0	510	0	510	0	510	0	510	0	510	0	510	510	0	0	0
197939	0	510	0	510	0	510	0	510	0	510	0	510	0	510	0	510	0	510	510	0	0	0		197939	0	510	0	510	0	510	0	510	0	510	0	510	0	510	0	510	0	510	0	510	510	0	0	0
198050	0	510	0	510	0	510	0	510	0	510	0	510	0	510	0	510	0	510	510	0	0	0		198050	0	510	0	510	0	510	0	510	0	510	0	510	0	510	0	510	0	510	0	510	510	0	0	0
198161	0	510	0	510	0	510	0	510	0	510	0	510	0	510	0	510	0	510	510	0	0	0		198161	0	510	0	510	0	510	0	510	0	510	0	510	0	510	0	510	0	510	0	510	510	0	0	0
198272	0	510	0	510	0	510	0	510	0	510	0	510	0	510	0	510	0	510	510	0	0	0		198272	0	510	0	510	0	510	0	510	0	510	0	510	0	510	0	510	0	510	0	510	510	0	0	0
198383	0	510	0	510	0	510	0	510	0	510	0	510	0	510	0	510	0	510	510	0	0	0		198383	0	510	0	510	0	510	0	510	0	510	0	510	0	510	0	510	0	510	0	510	510	0	0	0
198493	0	510	0	510	0	510	0	510	0	510	0	510	0	510	0	510	0	510	510	0	0	0		198493	0	510	0	510	0	510	0	510	0	510	0	510	0	510	0	510	0	510	0	510	510	0	0	0
198604	0	510	0	510	0	510	0	510	0	510	0	510	0	510	0	510	0	510	510	0	0	0		198604	0	510	0	510	0	510	0	510	0	510	0	510	0	510	0	510	0	510	0	510	510	0	0	0
198715	0	510	0	510	0	510	0	510	0	510	0	510	0	510	0	510	0	510	510	0	0	0		198715	0	510	0	510	0	510	0	510	0	510	0	510	0	510	0	510	0	510	0	510	510	0	0	0
198826	0	510	0	510	0	510	0	510	0	510	0	510	0	510	0	510	0	510	510	0	0	0		198826	0	510	0	510	0	510	0	510	0	510	0	510	0	510	0	510	0	510	0	510	510	0	0	0
198936	0	510	0	510	0	510	0	510	0	510	0	510	0	510	0	510	0	510	510	0	0	0		198936	0	510	0	510	0	510	0	510	0	510	0	510	0	510	0	510	0	510	0	510	510	0	0	0
199047	0	510	0	510	0	510	0	510	0	510	0	510	0	510	0	510	0	510	510	0	0	0		199047	0	510	0	510	0	510	0	510	0	510	0	510	0	510	0	510	0	510	0	510	510	0	0	0
199158	0	510	0	510	0	510	0	510	0	510	0	510	0	510	0	510	0	510	510	0	0	0		199158	0	510	0	510	0	510	0	510	0	510	0	510	0	510	0	510	0	510	0	510	510	0	0	0
199269	0	510	0	510	0	510	0	510	0	510	0	510	0	510	0	510	0	510	510	0	0	0		199269	0	510	0	510	0	510	0	510	0	510	0	510	0	510	0	510	0	510	0	510	510	0	0	0
199379	0	510	0	510	0	510	0	510	0	510	0	510	0	510	0	510	0	510	510	0	0	0		199379	0	510	0	510	0	510	0	510	0	510	0	510	0	510	0	510	0	510	0	510	510	0	0	0
199490	0	510	0	510	0	510	0	510	0	510	0	510	0	510	0	510	0	510	510	0	0	0		199490	0	510	0	510	0	510	0	510	0	510	0	510	0	510	0	510	0	510	0	510	510	0	0	0
199601	0	510	0	510	0	510	0	510	0	510	0	510	0	510	0	510	0	510	510	0	0	0		199601	0	510	0	510	0	510	0	510	0	510	0	510	0	510	0	510	0	510	0	510	510	0	0	0
199712	0	510	0	510	0	510	0	510	0	510	0	510	0	510	0	510	0	510	510	0	0	0		199712	0	510	0	510	0	510	0	510	0	510	0	510	0	510	0	510	0	510	0	510	510	0	0	0
199823	0	510	0	510	0	510	0	510	0	510	0	510	0	510	0	510	0	510	510	0	0	0		199823	0	510	0	510	0	510	0	510	0	510	0	510	0	510	0	510	0	510	0	510	510	0	0	0
199933	0	510	0	510	0	510	0	510	0	510	0	510	0	510	0	510	0	510	510	0	0	0		199933	0	510	0	510	0	510	0	510	0	510	0	510	0	510	0	510	0	510	0	510	510	0	0	0
200044	0	510	0	510	0	510	0	510	0	510	0	510	0	510	0	510	0	510	510	0	0	0		200044	0	510	0	510	0	510	0	510	0	510	0	510	0	510	0	510	0	510	0	510	510	0	0	0
200155	0	510	0	510	0	510	0	510	0	510	0	510	0	510	0	510	0	510	510	0	0	0		200155	0	510	0	510	0	510	0	510	0	510	0	510	0	510	0	510	0	510	0	510	510	0	0	0
200266	0	510	0	510	0	510	0	510	0	510	0	510	0	510	0	510	0	510	510	0	0	0		200266	0	510	0	510	0	510	0	510	0	510	0	510	0	510	0	510	0	510	0	510	510	0	0	0
200376	0	510	0	510	0	510	0	510	0	510	0	510	0	510	0	510	0	510	510	0	0	0		200376	0	510	0	510	0	510	0	510	0	510	0	510	0	510	0	510	0	510	0	510	510	0	0	0
200487	0	510	0	510	0	510	0	510	0	510	0	510	0	510	0	510	0	510	510	0	0	0		200487	0	510	0	510	0	510	0	510	0	510	0	510	0	510	0	510	0	510	0	510	510	0	0	0
200598	0	510	0	510	0	510	0	510	0	510	0	510	0	510	0	510	0	510	510	0	0	0		200598	0	510	0	510	0	510	0	510	0	510	0	510	0	510	0	510	0	510	0	510	510	0	0	0
200709	0	510	0	510	0	510	0	510	0	510	0	510	0	510	0	510	0	510	510	0	0	0		200709	0	510	0	510	0	510	0	510	0	510	0	510	0	510	0	510	0	510	0	510	510	0	0	0
200819	0	510	0	510	0	510	0	510	0	510	0	510	0	510	0	510	0	510	510	0	0	0		200819	0	510	0	510	0	510	0	510	0	510	0	510	0	510	0	510	0	510	0	510	510	0	0	0
200930	0	510	0	510	0	510	0	510	0	510	0	510	0	510	0	510	0	510	510	0	0	0		200930	0	510	0	510	0	510	0	510	0	510	0	510	0	510	0	510	0	510	0	510	510	0	0	0
201041	0	510	0	510	0	510	0	510	0	510	0	510	0	510	0	510	0	510	510	0	0	0		201041	0	510	0	510	0	510	0	510	0	510	0	510	0	510	0	510	0	510	0	510	510	0	0	0
201152	0	510	0	510	0	510	0	510	0	510	0	510	0	510	0	510	0	510	510	0	0	0		201152	0	510	0	510	0	510	0	510	0	510	0	510	0	510	0	510	0	510	0	510	510	0	0	0
201262	0	510	0	510	0	510	0	510	0	510	0	510	0	510	0	510	0	510	510	0	0	0		201262	0	510	0	510	0	510	0	510	0	510	0	510	0	510	0	510	0	510	0	510	510	0	0	0
201373	0	510	0	510	0	510	0	510	0	510	0	510	0	510	0	510	0	510	510	0	0	0		201373	0	510	0	510	0	510	0	510	0	510	0	510	0	510	0	510	0	510	0	510	510	0	0	0
201484	0	510	0	510	0	510	0	510	0	510	0	510	0	510	0	510	0	510	510	0	0	0		201484	0	510	0	510	0	510	0	510	0	510	0	510	0	510	0	510	0	510	0	510	510	0	0	0
201595	0	510	0	510	0	510	0	510	0	510	0	510	0	510	0	510	0	510	510	0	0	0		201595	0	510	0	510	0	510	0	510	0	510	0	510	0	510	0	510	0	510	0	510	510	0	0	0
201706	0	510	0	510	0	510	0	510	0	510	0	510	0	510	0	510	0	510	510	0	0	0		201706	0	510	0	510	0	510	0	510	0	510	0	510	0	510	0	510	0	510	0	510	510	0	0	0
201816	0	510	0	510	0	510	0	510	0	510	0	510	0	510	0	510	0	510	510	0	0	0		201816	0	510	0	510	0	510	0	510	0	510	0	510	0	510	0	510	0	510	0	510	510	0	0	0
201927	0	510	0	510	0	510	0	510	0	510	0	510	0	510	0	510	0	510	510	0	0	0		201927	0	510	0	510	0	510	0	510	0	510	0	510	0	510	0	510	0	510	0	510	510	0	0	0
202038	0	510	0	510	0	510	0	510	0	510	0	510	0	510	0	510	0	510	510	0	0	0		202038	0	510	0	510	0	510	0	510	0	510	0	510	0	510	0	510	0	510	0	510	510	0	0	0
202149	0	510	0	510	0	510	0	510	0	510	0	510	0	510	0	510	0	510	510	0	0	0		202149	0	510	0	510	0	510	0	510	0	510	0	510	0	510	0	510	0	510	0	510	510	0	0	0
202259	0	510	0	510	0	510	0	510	0	510	0	510	0	510	0	510	0	510	510	0	0	0		202259	0	510	0	510	0	510	0	510	0	510	0	510	0	510	0	510	0	510	0	510	510	0	0	0
202370	0	510	0	510	0	510	0	510	0	510	0	510	0	510	0	510	0	510	510	0	0	0		202370	0	510	0	510	0	510	0	510	0	510	0	510	0	510	0	510	0	510	0	510	510	0	0	0
202481	0	510	0	510	0	510	0	510	0	510	0	510	0	510	0	510	0	510	510	0	0	0		202481	0	510	0	510	0	510	0	510	0	510	0	510	0	510	0	510	0	510	0	510	510	0	0	0
202592	0	510	0	510	0	510	0	510	0	510	0	510	0	510	0	510	0	510	510	0	0	0		202592	0	510	0	510	0	510	0	510	0	510	0	510	0	510	0	510	0	510	0	510	510	0	0	0
202702	0	510	0	510	0	510	0	510	0	510	0	510	0	510	0	510	0	510	510	0	0	0		202702	0	510	0	510	0	510	0	510	0	510	0	510	0	510	0	510	0	510	0	510	510	0	0	0
202813	0	510	0	510	0	510	0	510	0	510	0	510	0	510	0	510	0	510	510	0	0	0		202813	0	510	0	510	0	510	0	510	0	510	0	510	0	510	0	510	0	510	0	510	510	0	0	0
202924	-0.35	510	0.63	510	-0.43	510	0.01	510	-0.42	510	-0.38	510	-0.89	510	-0.28	510	-1.34	510	510	0	-0.383333	0.181384		202924	0.8	510	0.52	510	-0.22	510	0.36	510	0.03	510	0.1	510	0.15	510	-0.52	510	-0.05	510	-0.25	510	510	0	0.092	0.123494
203035	-0.06	510	0.91	510	-0.65	510	0.13	510	-0.54	510	-0.33	510	-0.5	510	-0.46	510	-1.04	510	510	0	-0.282222	0.186263		203035	0.82	510	0.18	510	0.24	510	0.3	510	0.24	510	-0.2	510	0.25	510	-0.24	510	0.18	510	0.31	510	510	0	0.208	0.0922533
203145	0.15	510	1.38	510	-0.63	510	-0.22	510	-0.52	510	-0.59	510	-0.55	510	-0.22	510	-1.14	511	510.111	0.111111	-0.26	0.236667		203145	0.61	510	0.34	510	0.54	510	0.38	510	0.37	510	0.09	510	0.34	510	-0.43	510	-0.1	510	0.03	510	510	0	0.217	0.10051
203256	-0.34	510	0.64	510	-0.53	510	0.01	510	-0.47	510	-0.45	510	-0.44	510	-0.5	510	-0.91	512	510.222	0.222222	-0.332222	0.14472		203256	0.27	510	0.28	510	-0.2	510	0.4	510	0.38	510	-0.08	510	0.31	510	-0.26	510	-0.18	510	-0.2	510	510	0	0.072	0.0873282
203367	-0.4	510	0.95	510	-0.53	510	-0.1	510	-0.63	510	-0.1	510	-0.52	510	-0.29	510	-1.04	512	510.222	0.222222	-0.295556	0.182963		203367	0.65	510	0.25	510	-0.77	510	0.15	510	0.26	510	0.13	510	0.31	510	-0.06	510	-0.21	510	0.21	510	510	0	0.092	0.119636
203478	-0.37	510	0.81	510	-0.63	510	0.21	510	-0.71	510	-0.38	510	-0.66	510	-0.13	510	-0.65	512	510.222	0.222222	-0.278889	0.169045		203478	0.55	510	0.05	510	-1.37	510	0.54	510	0.07	510	0.27	510	0.22	510	0.05	510	-0.23	510	0	510	510	0	0.015	0.171686
203589	-0.17	510	0.66	510	-0.44	510	0.05	510	-0.38	510	-0.29	510	-0.72	510	0.01	510	-0.6	512	510.222	0.222222	-0.208889	0.138187		203589	0.41	510	0.36	510	-0.87	510	0.7	510	0.54	510	-0.07	510	0.34	510	-0.02	510	-0.01	510	0.26	510	510	0	0.164	0.139676
203699	0.09	510	0.72	510	-0.61	510	-0.04	510	-0.36	510	-0.37	510	-0.56	510	-0.59	510	-0.61	512	510.222	0.222222	-0.258889	0.148945		203699	0.53	510	0.18	510	-0.32	510	1.06	510	0.13	510	0.02	510	0.32	510	-0.38	510	-0.43	510	-0.05	510	510	0	0.106	0.14447
203810	0.28	510	0.57	510	-0.26	510	-0.16	510	-0.2	510	-0.2	510	-0.39	510	-0.03	510	-0.98	512	510.222	0.222222	-0.152222	0.143438		203810	0.74	510	0.55	510	0.13	510	0.97	510	0.15	510	-0.04	510	0.31	510	-0.18	510	-0.31	510	0.49	510	510	0	0.281	0.129404
203921	-0.2	510	0.78	510	-0.6	510	0.08	510	-0.31	510	0.02	510	-0.72	510	-0.3	510	-1.03	512	510.222	0.222222	-0.253333	0.174921		203921	0.58	510	0.45	510	-0.47	510	0.34	510	0.1	510	0.55	510	0.39	510	-0.05	510	0.02	510	0.33	510	510	0	0.224	0.102742
204032	0.02	510	0.79	510	-0.25	510	0.26	510	-0.42	510	-0.18	510	-0.39	510	0.07	510	-1.45	512	510.222	0.222222	-0.172222	0.20262		204032	0.81	510	0.73	510	-0.93	510	0.35	510	-0.07	510	0.2	510	0.16	510	-0.1	510	-0.23	510	0.21	510	510	0	0.113	0.157276
204142	-0.21	510	0.98	510	-0.28	510	0.37	510	-0.4	510	-0.1	510	-0.46	510	-0.01	510	-0.9	513	510.333	0.333333	-0.112222	0.178658		204142	0.65	510	0.59	510	-0.47	510	0.98	510	0.19	510	0.03	510	0.3	510	-0.05	510	-0.2	510	0.26	510	510	0	0.228	0.136185
204253	-0.1	510	0.92	510	-0.49	510	-0.24	510	-0.72	510	-0.3	510	-0.85	510	-0.04	510	-0.74	513	510.333	0.333333	-0.284444	0.178964		204253	0.63	510	0.61	510	-0.76	510	1.03	510	0.33	510	-0.17	510	-0.06	510	-0.23	510	-0.51	510	-0.08	510	510	0	0.079	0.176569
204364	-0.25	510	0.73	510	-0.47	510	-0.16	510	-0.91	510	0.18	510	-0.13	510	-0.17	510	-0.29	513	510.333	0.333333	-0.163333	0.148707		204364	1.01	510	0.86	510	-0.61	510	0.61	510	0.07	510	0.17	510	0.4	510	-0.11	510	-0.33	510	-0.06	510	510	0	0.201	0.16392
204475	-0.13	510	0.88	510	-0.54	510	-0.17	510	-0.38	510	-0.17	510	-0.47	510	0.05	510	-0.61	513	510.333	0.333333	-0.171111	0.149865		204475	0.42	510	0.79	510	-0.68	510	0.69	510	0.23	510	0.09	510	0.42	510	-0.27	510	-0.27	510	0.58	510	510	0	0.2	0.151239
204585	-0.12	510	0.7	510	-0.38	510	-0.03	510	-0.64	510	-0.23	510	-0.6	510	-0.73	510	-0.7	513	510.333	0.333333	-0.303333	0.15216		204585	0.46	510	0.88	510	-0.35	510	0.51	510	0.76	510	0.2	510	0.18	510	-0.27	510	-0.22	510	-0.06	510	510	0	0.209	0.137707
204696	0.16	510	0.62	510	-0.56	510	-0.02	510	-0.37	510	-0.48	510	-0.32	510	-0.2	510	-0.86	513	510.333	0.333333	-0.225556	0.145078		204696	0.46	510	0.7	510	-0.18	510	0.51	510	0.26	510	-0.01	510	0.38	510	-0.09	510	-0.46	510	0.36	510	510	0	0.193	0.11465
204807	0.01	510	0.74	510	-0.62	510	-0.16	510	-0.35	510	-0.08	510	-0.94	510	-0.46	510	-1.31	513	510.333	0.333333	-0.352222	0.196545		204807	0.65	510	0.65	510	0.26	510	0.67	510	0.13	510	-0.01	510	0.27	510	-0.23	510	-0.18	510	0.26	510	510	0	0.247	0.105104
204918	-0.32	510	0.87	510	-0.45	510	-0.12	510	-0.17	510	-0.2	510	-0.48	510	-0.32	510	-0.83	513	510.333	0.333333	-0.224444	0.154264		204918	0.86	510	0.72	510	-0.99	510	0.58	510	-0.04	510	0.24	510	0.81	510	-0.23	510	-0.39	510	0.29	510	510	0	0.185	0.189639
205029	-0.13	510	0.88	510	-0.42	510	0.04	510	-0.42	510	-0.11	510	-0.75	510	-0.2	510	-0.71	513	510.333	0.333333	-0.202222	0.162291		205029	0.78	510	0.66	510	-1.25	510	0.62	510	-0.08	510	0.24	510	0.48	510	-0.37	510	-0.24	510	0.34	510	510	0	0.118	0.195964
205139	-0.26	510	0.92	510	-0.79	510	-0.17	510	-0.57	510	-0.42	510	-0.62	510	0.05	510	-0.96	513	510.333	0.333333	-0.313333	0.186085		205139	0.92	510	0.75	510	-1.05	510	0.72	510	0.08	510	0.15	510	0.26	510	-0.03	510	-0.43	510	-0.03	510	510	0	0.134	0.18659
205250	0.05	510	1	510	-0.41	510	-0.16	510	-0.45	510	-0.26	510	-0.74	510	-0.26	510	-0.76	513	510.333	0.333333	-0.221111	0.175558		205250	0.85	510	0.81	510	-0.36	511	0.43	510	0.33	510	-0.06	510	0.48	510	0.09	510	-0.62	510	-0.02	510	510.1	0.1	0.193	0.151159
205361	0.12	510	0.89	510	-0.58	510	-0.25	510	-0.53	510	-0.02	510	-0.79	510	-0.34	510	-0.8	513	510.333	0.333333	-0.255556	0.177898		205361	0.44	510	0.7	510	0.36	511	0.41	510	0.37	510	-0.03	510	0.24	510	-0.4	510	-0.44	510	0.03	510	510.1	0.1	0.168	0.117802
205472	-0.07	510	0.43	510	-0.38	510	0.06	510	-0.17	510	-0.21	510	-0.93	510	-0.02	510	-1.13	513	510.333	0.333333	-0.268889	0.162544		205472	0.45	510	0.57	510	0.18	511	0.63	510	0.49	510	0.23	510	0.36	510	-0.26	510	-0.03	510	0.04	510	510.1	0.1	0.266	0.0907891
205582	0.14	510	0.67	510	-0.46	510	0.13	510	-0.56	510	-0.08	510	-0.51	510	-0.18	510	-0.93	513	510.333	0.333333	-0.197778	0.159093		205582	0.63	510	0.51	510	0.09	511	0.45	510	0.28	510	-0.04	510	0.24	510	-0.18	510	-0.16	510	0.1	510	510.1	0.1	0.192	0.0884785
205693	0.35	510	0.36	510	-0.42	510	-0.27	510	-0.65	510	0.02	510	-0.92	510	-0.29	510	-0.7	513	510.333	0.333333	-0.28	0.150886		205693	0.68	510	0.68	510	-0.48	511	0.94	510	0.3	510	-0.1	510	0.65	510	-0.25	510	-0.24	510	0.02	510	510.1	0.1	0.22	0.156269
205804	-0.4	510	0.56	510	-0.48	510	-0.01	510	-0.35	510	-0.2	510	-0.77	510	-0.19	510	-0.87	513	510.333	0.333333	-0.301111	0.141249		205804	0.67	510	0.48	510	-0.29	511	0.73	510	0.16	510	0.07	510	0.35	510	0	510	-0.03	510	0.21	510	510.1	0.1	0.235	0.102309
205915	-0.09	510	0.53	510	-0.31	510	0.02	510	-0.18	510	0.39	510	-0.72	510	-0.26	510	-0.76	513	510.333	0.333333	-0.153333	0.145392		205915	0.65	510	0.6	510	-0.35	511	0.42	510	0.02	510	0.1	510	0.27	510	-0.17	510	0.01	510	0.33	510	510.1	0.1	0.188	0.102695
206025	0.28	510	0.57	510	-0.61	510	-0.23	510	-0.51	510	-0.52	510	-0.89	510	-0.21	510	-1.16	513	510.333	0.333333	-0.364444	0.180479		206025	0.58	510	0.52	510	-0.2	511	0.18	510	0.45	510	0.07	510	0.29	510	0.13	510	0.03	510	-0.01	510	510.1	0.1	0.204	0.0797524
206136	0.12	510	0.94	510	-0.56	510	-0.14	510	-0.52	510	-0.33	510	-1.04	510	0.19	510	-0.54	513	510.333	0.333333	-0.208889	0.191017		206136	0.66	510	0.51	510	0.04	511	0.38	510	0.34	510	0.05	510	0.33	510	0.2	510	0.03	510	-0.26	510	510.1	0.1	0.228	0.0854634
206247	-0.28	510	0.55	510	-0.34	510	0.11	510	-0.64	510	-0.13	510	-0.93	510	-0.15	510	-0.74	513	510.333	0.333333	-0.283333	0.151272		206247	0.68	510	0.84	510	0.33	511	1.08	510	0.37	510	-0.08	510	0.49	510	0.1	510	-0.31	510	0.53	510	510.1	0.1	0.403	0.1329
206358	0.44	510	1	510	-0.32	510	0.06	510	-0.93	510	-0.09	510	-0.91	510	-0.26	510	-0.8	513	510.333	0.333333	-0.201111	0.215519		206358	0.61	510	0.54	510	-0.27	511	0.5	510	0.27	510	0.03	510	0.46	510	-0.3	510	-0.4	510	0.1	510	510.1	0.1	0.154	0.119946
206468	0.41	510	0.97	510	-0.58	510	-0.1	510	-0.66	510	-0.22	510	-0.85	510	0.01	510	-0.87	513	510.333	0.333333	-0.21	0.204871		206468	0.91	510	0.55	510	-0.16	511	0.39	510	0.3	510	0.02	510	0.5	510	-0.33	510	-0.48	510	-0.16	510	510.1	0.1	0.154	0.140493
206579	0.47	510	1.26	510	-0.74	510	-0.26	510	-0.46	510	-0.6	510	-0.91	510	-0.08	510	-0.71	513	510.333	0.333333	-0.225556	0.232021		206579	0.66	510	0.22	510	0.29	511	0.49	510	0.34	510	-0.08	510	0.58	510	0.07	510	-0.67	510	-0.24	510	510.1	0.1	0.166	0.129204
206690	0.16	510	0.79	510	-0.5	510	-0.35	510	-0.57	510	-0.35	510	-0.97	510	0.06	510	-1.53	513	510.333	0.333333	-0.362222	0.222803		206690	0.38	510	0.39	510	-0.21	511	0.25	510	0.13	510	0.04	510	0.79	510	-0.26	510	-0.22	510	-0.15	510	510.1	0.1	0.114	0.10823
206801	-0.11	510	0.65	510	-0.41	510	-0.26	510	-0.53	510	-0.67	510	-1.11	510	-0.16	510	-1.47	513	510.333	0.333333	-0.452222	0.20338		206801	0.66	510	0.2	510	0.49	511	0.39	510	0.34	510	-0.05	510	0.41	510	-0.32	510	0.29	510	0.1	510	510.1	0.1	0.251	0.0894731
206912	0.17	510	1.01	510	-0.78	510	-0.17	510	-0.28	510	-0.03	510	-0.75	510	-0.24	510	-1.15	514	510.444	0.444444	-0.246667	0.209517		206912	0.57	510	0.4	510	-0.28	511	0.56	510	0.5	510	-0.27	510	0.32	510	0.12	510	0.25	510	-0.11	510	510.1	0.1	0.206	0.103647
207022	0.09	510	0.55	510	-0.59	510	0.15	510	-0.73	510	0.13	510	-1.03	510	-0.46	510	-1.45	515	510.556	0.555556	-0.371111	0.216233		207022	0.44	510	0.34	510	-0.56	511	0.53	510	0.25	510	-0.17	510	0.46	510	-0.22	510	-0.28	510	-0.02	510	510.1	0.1	0.077	0.119006
207133	-0.17	510	0.81	510	-0.45	510	-0.12	510	-0.59	510	-0.04	510	-0.66	510	-0.5	510	-0.63	516	510.667	0.666667	-0.261111	0.154582		207133	0.54	510	0.28	510	0.28	511	0.54	510	0.66	510	0.05	510	0.23	510	-0.02	510	0.17	510	0.01	510	510.1	0.1	0.274	0.0752507
207244	0.65	510	0.86	510	-0.61	510	-0.1	510	-0.81	510	-0.35	510	-0.78	510	-0.61	510	-0.43	516	510.667	0.666667	-0.242222	0.202764		207244	0.49	510	0.09	510	0.18	511	0.4	510	0.32	510	0.18	510	0.51	510	-0.16	510	0.14	510	0.08	510	510.1	0.1	0.223	0.065812
207355	0.27	510	1.15	510	-0.65	510	0.03	510	-0.08	510	-0.39	510	-1.1	510	-0.14	510	-0.38	516	510.667	0.666667	-0.143333	0.209709		207355	0.81	510	0.19	510	1.13	511	0.48	510	0.39	510	-0.25	510	0.53	510	-0.57	510	0.17	510	0.46	510	510.1	0.1	0.334	0.154375
207465	0.58	510	1.25	510	-0.65	510	-0.25	510	-0.84	510	0.01	510	-0.97	510	0.06	510	-0.38	516	510.667	0.666667	-0.132222	0.236325		207465	0.4	510	0.04	510	0.69	511	0	510	0.52	510	-0.53	510	0.25	510	0.44	510	-0.31	510	0.23	510	510.1	0.1	0.173	0.119945
207576	0.22	510	0.78	509	-0.42	510	-0.04	510	-0.51	510	0	510	-1.28	510	-0.24	510	-0.4	516	510.556	0.689426	-0.21	0.188341		207576	0.51	510	0.2	510	0.73	511	0.49	510	0.65	510	-0.19	510	0.26	510	-0.24	510	-0.15	510	-0.18	510	510.1	0.1	0.208	0.119218
207687	0.11	510	0.6	509	-0.64	510	-0.2	510	-0.26	510	-0.36	510	-0.97	510	-0.45	510	-0.36	516	510.556	0.689426	-0.281111	0.148169		207687	0.7	510	-0.1	510	1.16	511	0.3	510	0.42	510	0.24	510	0.18	510	0.17	510	-0.03	510	0	510	510.1	0.1	0.304	0.120538
207798	0.31	510	0.83	509	-0.8	510	-0.22	510	-0.79	510	0.2	510	-0.17	510	-0.18	510	-0.08	516	510.556	0.689426	-0.1	0.171399		207798	0.76	510	0.12	510	1.02	511	0.5	510	0.68	510	0.29	510	0.55	510	0	510	-0.36	510	-0.12	510	510.1	0.1	0.344	0.137115
207908	-0.02	510	1.08	509	-0.62	510	-0.5	510	-0.41	510	0.32	510	-0.83	510	-0.23	510	-0.51	516	510.556	0.689426	-0.191111	0.195252		207908	0.7	510	0.35	510	0.39	510	0.29	510	0.55	510	0.16	510	0.14	510	-0.07	510	0	510	0.24	510	510	0	0.275	0.0747329
208019	0.17	510	0.98	509	-0.47	510	-0.43	510	-0.63	510	0.26	510	-0.94	510	-0.09	510	-0.61	516	510.556	0.689426	-0.195556	0.19647		208019	0.59	510	0.67	510	0.34	510	0.21	510	0.46	510	0.36	510	0.43	510	-0.34	510	-0.21	510	0.2	510	510	0	0.271	0.102637
208130	-0.17	510	0.86	509	-0.46	510	-0.2	510	-0.86	510	-0.29	510	-1.16	510	-0.32	510	-0.31	516	510.556	0.689426	-0.323333	0.184353		208130	0.56	510	0.4	510	0.46	510	0.18	510	0.44	510	0.02	510	0.6	510	-0.13	510	-0.18	510	-0.08	510	510	0	0.227	0.094986
208241	0.1	510	0.64	509	-0.62	510	-0.04	510	-0.43	510	0.01	510	-0.96	510	-0.53	510	-0.33	516	510.556	0.689426	-0.24	0.157392		208241	0.8	510	0.49	510	0.21	510	0.09	510	0.2	510	0.05	510	0.7	510	-0.3	510	-0.15	510	0.34	510	510	0	0.243	0.110675
208352	-0.04	510	0.68	509	-0.65	510	-0.28	510	-0.65	510	0.07	510	-1.09	510	-0.01	510	-0.28	516	510.556	0.689426	-0.25	0.170636		208352	0.62	510	0.42	510	-0.45	510	0.06	510	0.35	510	0.23	510	0.53	510	-0.16	510	-0.2	510	0.13	510	510	0	0.153	0.109118
208462	-0.08	510	0.49	509	-0.59	510	-0.24	510	-0.01	510	0.09	510	-1.07	510	0	510	-0.36	516	510.556	0.689426	-0.196667	0.148455		208462	0.7	510	0.56	510	-0.07	510	-0.23	510	0.4	510	-0.07	510	0.2	510	-0.16	510	-0.02	510	0.18	510	510	0	0.149	0.100149
208573	0.21	510	0.42	509	-0.41	510	-0.24	510	-0.47	510	-0.39	510	-0.85	511	-0.64	510	-0.79	516	510.667	0.687184	-0.351111	0.142687		208573	0.78	510	0.27	510	-0.01	510	0.33	510	0.52	510	-0.26	510	0.39	510	-0.1	510	-0.27	510	-0.11	510	510	0	0.154	0.112459
208684	1.07	510	0.47	509	-0.56	510	-0.17	510	-1.06	510	-0.3	510	-1.36	511	-0.28	510	-0.46	516	510.667	0.687184	-0.294444	0.243847		208684	0.73	510	0.45	510	-0.16	510	0.16	510	0.34	510	-0.31	510	0.49	510	0.33	510	-0.36	510	0.18	510	510	0	0.185	0.113874
208795	1	510	0.87	509	-0.57	510	-0.13	510	-0.69	510	0.21	510	-1.31	511	-0.27	510	-0.25	516	510.667	0.687184	-0.126667	0.245119		208795	0.63	510	0.41	510	0.38	510	0	510	0.09	510	0.2	510	0.13	510	0.11	510	-0.14	510	0.02	510	510	0	0.183	0.0723886
208905	0.48	509	0.99	509	-0.64	510	-0.22	510	-0.45	510	-0.14	510	-0.96	512	-0.34	510	-0.45	516	510.667	0.726483	-0.192222	0.197124		208905	0.47	510	0.46	510	0.21	510	-0.16	510	0.32	510	-0.01	510	0.39	510	0.04	510	-0.29	510	0.15	510	510	0	0.158	0.0826882
209016	0.54	509	1.17	509	-0.56	510	-0.19	510	-0.68	510	0	510	-0.98	512	-0.32	510	-0.31	516	510.667	0.726483	-0.147778	0.218421		209016	0.47	510	0.23	510	0.05	510	-0.04	510	0.36	510	0.06	510	0.26	510	0.22	510	-0.33	510	0.11	510	510	0	0.139	0.0710938
209127	0.56	509	0.6	509	-0.73	510	-0.25	510	-0.63	510	0.26	510	-0.66	512	-0.49	510	-0.72	516	510.667	0.726483	-0.228889	0.184695		209127	0.49	510	0.5	510	-0.75	510	-0.14	510	0.25	510	0.21	510	0.48	510	0.24	510	-0.38	510	0.26	510	510	0	0.116	0.130989
209238	0.16	509	0.84	509	-0.44	510	-0.35	510	-0.26	510	-0.32	510	-0.64	512	-0.13	510	-0.74	516	510.667	0.726483	-0.208889	0.158056		209238	0.75	510	0.2	510	-0.87	510	0.04	510	0.37	510	0.16	510	0.33	510	-0.15	510	-0.4	510	0.1	510	510	0	0.053	0.141296
209348	0.5	509	0.81	509	-0.7	510	-0.26	510	-0.75	510	-0.08	510	-0.82	512	-0.23	510	-0.83	516	510.667	0.726483	-0.262222	0.198185		209348	0.42	510	0.44	510	-0.39	510	-0.38	510	0.25	510	-0.13	510	0.25	510	0.32	510	-0.19	510	0.47	510	510	0	0.106	0.108292
209459	0.22	509	0.87	509	-0.67	510	-0.61	510	-0.33	510	-0.12	510	-0.97	512	-0.17	510	-0.38	516	510.667	0.726483	-0.24	0.180485		209459	0.73	510	0.52	510	-0.29	510	-0.14	510	0.39	510	-0.01	510	0.49	510	0.05	510	-0.31	510	0.1	510	510	0	0.153	0.114203
209570	0.34	509	0.49	509	-0.6	510	-0.46	510	-0.57	510	-0.43	510	-0.89	512	-0.36	510	-0.63	516	510.667	0.726483	-0.345556	0.152799		209570	0.73	510	0.21	510	-0.49	510	0.32	510	0.4	510	0.27	510	0.33	510	-0.06	510	-0.25	510	-0.29	510	510	0	0.117	0.119006
209681	0.34	509	0.94	509	-0.59	510	-0.4	510	-0.9	510	-0.61	510	-0.92	512	-0.22	510	-0.85	516	510.667	0.726483	-0.356667	0.209556		209681	0.68	510	0.24	510	-0.2	510	0.24	510	0.86	510	-0.07	510	0.51	510	0.04	510	-0.09	510	0.04	510	510	0	0.225	0.111915
209791	0.11	509	0.39	509	-0.82	510	-0.4	510	-0.47	510	-0.09	510	-0.95	512	-0.45	510	-0.81	516	510.667	0.726483	-0.387778	0.150617		209791	0.9	510	0.18	510	-0.4	510	0.35	510	0.56	510	0.13	510	0.4	510	0.02	510	-0.25	510	-0.12	510	510	0	0.177	0.123801
209902	0.12	509	0.33	509	-0.62	510	-0.23	510	-0.61	510	-0.16	510	-1.01	512	-0.69	510	-0.9	516	510.667	0.726483	-0.418889	0.152993		209902	0.51	510	0.2	510	-0.86	510	-0.01	510	0.47	510	0	510	0.54	510	0.15	510	0.06	510	0.18	510	510	0	0.124	0.127237
210013	0.27	509	0.4	509	-0.63	510	-0.33	510	-0.83	510	-0.31	510	-0.82	512	-0.43	510	-0.78	516	510.667	0.726483	-0.384444	0.151805		210013	0.53	510	0.08	510	-0.16	510	0.11	510	0.28	510	-0.07	510	0.55	510	-0.25	510	-0.31	510	0.24	510	510	0	0.1	0.0958587
210124	0.1	509	0.98	509	-0.73	510	-0.13	510	-0.56	510	-0.04	510	-0.92	512	-0.42	510	-0.85	516	510.667	0.726483	-0.285556	0.198845		210124	0.59	510	0.11	510	-0.12	510	0.15	510	0.06	510	-0.08	510	0.45	510	-0.22	510	-0.22	510	0.05	510	510	0	0.077	0.0849582
210235	0.15	509	0.62	509	-0.59	510	-0.29	510	-0.86	510	0.05	510	-0.85	512	-0.36	510	-0.57	516	510.667	0.726483	-0.3	0.164494		210235	0.51	510	0.13	510	0.27	510	-0.35	510	0.22	510	0.19	510	0.54	510	-0.04	510	0.09	510	-0.27	510	510	0	0.129	0.0921768
210345	0.43	509	0.8	509	-0.4	510	-0.35	510	-0.84	510	0.33	510	-0.87	512	-0.25	510	-1.13	516	510.667	0.726483	-0.253333	0.2186		210345	0.73	510	-0.06	510	0.56	510	0.04	510	0.39	510	-0.11	510	0.64	510	-0.08	510	-0.39	510	0.36	510	510	0	0.208	0.119302
210456	0.07	509	0.72	509	-0.27	510	-0.05	510	-1.43	510	0.44	510	-0.49	512	-0.23	510	-1.02	516	510.667	0.726483	-0.251111	0.223703		210456	0.53	510	0.23	510	0.33	510	0.5	510	0.28	510	0.04	510	0.56	510	-0.29	510	0	510	0.22	510	510	0	0.24	0.0845117
210567	0.24	509	0.54	509	-0.46	510	-0.33	510	-1.04	510	-0.12	510	-0.63	512	-0.41	510	-0.77	517	510.778	0.829621	-0.331111	0.164016		210567	0.59	510	0.26	510	0.1	510	-0.19	510	0.44	510	0.31	510	0.79	510	0.11	510	0.08	510	0.15	510	510	0	0.264	0.0894204
210678	0.23	509	0.81	509	-0.66	510	-0.05	510	-1.07	511	-0.01	510	-0.63	512	-0.82	510	-0.46	517	510.889	0.824022	-0.295556	0.196738		210678	0.57	510	0.08	510	-0.96	510	-0.06	510	0.37	510	0.01	510	0.59	510	-0.22	510	-0.25	510	-0.17	510	510	0	-0.004	0.144578
210788	0.36	509	0.7	509	-0.33	510	-0.36	510	-0.74	512	0.28	510	-0.68	512	-0.55	510	-0.87	517	511	0.833333	-0.243333	0.18533		210788	0.94	510	0.11	510	-0.22	510	-0.15	510	0.37	510	0.1	510	0.73	510	-0.41	510	0	510	0.16	510	510	0	0.163	0.132263
210899	0.46	509	0.76	509	-0.55	510	-0.17	510	-0.9	512	0.41	510	-0.95	512	0.14	510	-0.77	517	511	0.833333	-0.174444	0.215375		210899	0.81	510	0.23	510	-0.5	510	-0.1	510	0.13	510	-0.06	510	0.52	510	-0.58	510	-0.42	510	0.34	510	510	0	0.037	0.144323
211010	0.02	509	0.86	509	-0.67	510	-0.22	510	-0.58	512	-0.08	510	-0.93	512	-0.76	510	-0.55	517	511	0.833333	-0.323333	0.181972		211010	0.79	510	0.12	510	-0.54	510	0.08	510	0.27	510	-0.2	510	0.74	510	-0.32	510	-0.09	510	-0.23	510	510	0	0.062	0.138322
211121	0.24	509	0.64	509	-0.68	510	-0.09	510	-0.42	512	-0.17	510	-0.96	512	-0.43	510	-0.88	517	511	0.833333	-0.305556	0.17415		211121	0.63	510	0	510	-0.12	510	-0.18	510	0.2	510	-0.38	510	0.9	510	-0.22	510	-0.22	510	0.45	510	510	0	0.106	0.134373
211231	0.47	509	0.6	509	-0.44	510	-0.06	510	-0.84	512	-0.28	510	-1.02	512	-0.06	510	-0.65	517	511	0.833333	-0.253333	0.184504		211231	0.59	510	0.26	510	-0.29	510	0.12	510	0.06	510	0.07	510	0.64	510	-0.16	510	0.01	510	-0.25	510	510	0	0.105	0.100568
211342	0.07	509	0.25	509	-0.73	510	-0.33	510	-0.76	512	-0.51	510	-1.09	512	-0.05	510	-0.64	517	511	0.833333	-0.421111	0.146775		211342	0.51	510	0.23	510	0.14	510	0.22	510	0.3	510	-0.32	510	0.65	510	-0.23	510	-0.03	510	0.3	510	510	0	0.177	0.0958245
211453	-0.31	509	1.01	509	-0.18	510	-0.22	510	-0.32	512	-0.33	510	-0.43	513	-0.24	510	-0.86	517	511.111	0.857069	-0.208889	0.16657		211453	0.77	510	-0.07	510	0.26	510	-0.33	510	0.2	510	0.18	510	0.37	510	-0.04	510	-0.54	510	0.21	510	510	0	0.101	0.116375
211564	0.03	509	1.05	509	-0.44	510	-0.28	510	-0.06	512	-0.51	510	-0.8	513	-0.62	510	-0.76	517	511.111	0.857069	-0.265556	0.190264		211564	0.41	510	-0.09	510	-0.48	510	0.31	510	0.54	510	0.46	510	0.57	510	-0.43	510	-0.05	510	0.2	510	510	0	0.144	0.122513
211675	0.38	509	0.71	508	-0.32	510	-0.46	510	-0.25	512	-0.53	510	-0.55	513	-0.55	510	-0.96	517	511	0.897527	-0.281111	0.171646		211675	0.71	510	0	510	0.18	510	0.15	510	0.27	510	0.04	510	0.26	510	-0.5	510	0.02	510	0.08	510	510	0	0.121	0.0949555
211785	0.83	509	0.83	508	-0.46	510	-0.3	510	-0.45	512	-0.32	510	-0.49	513	-0.76	510	-1.04	517	511	0.897527	-0.24	0.216192		211785	0.57	510	-0.37	510	-0.21	510	-0.16	510	0.48	510	0.07	510	0.38	510	-0.02	510	-0.29	510	0.25	510	510	0	0.07	0.105893
211896	0.06	509	0.98	508	-0.39	510	-0.15	510	-0.35	512	-0.42	510	-0.45	513	-0.34	510	-0.76	517	511	0.897527	-0.202222	0.165208		211896	0.7	510	-0.23	510	-0.36	510	-0.01	510	0.32	510	0.21	510	0.38	510	-0.15	510	-0.37	510	0.11	510	510	0	0.06	0.110504
212007	-0.06	509	0.88	508	-0.26	510	0.02	510	-0.35	512	-0.27	510	-0.58	513	-0.66	510	-0.92	517	511	0.897527	-0.244444	0.171676		212007	1.06	510	-0.31	510	0.02	510	0.25	510	0.59	510	0.28	510	0.49	510	0.24	510	-0.08	510	0.2	510	510	0	0.274	0.120298
212118	-0.26	509	0.9	508	-0.42	510	-0.38	510	-0.29	512	0.03	510	-0.21	513	-0.38	510	-0.66	517	511	0.897527	-0.185556	0.14896		212118	0.42	510	-0.27	510	0.28	510	0.16	510	0.33	510	0.27	510	0.53	510	-0.26	510	-0.19	510	-0.5	510	510	0	0.077	0.111076
212228	-0.33	509	0.44	508	-0.73	510	-0.39	510	-0.58	512	0.09	510	-0.44	513	-0.24	510	-1.09	517	511	0.897527	-0.363333	0.148287		212228	0.41	510	-0.21	510	0.41	510	0.06	510	0.46	510	0.13	510	0.54	510	-0.2	510	0.15	510	-0.25	510	510	0	0.15	0.0945163
212339	-0.64	509	0.74	508	-0.53	510	-0.2	510	-0.69	512	0.29	510	-0.51	513	-0.57	510	-0.81	517	511	0.897527	-0.324444	0.17208		212339	0.6	510	-0.26	510	0.11	510	0.01	510	-0.02	510	0.03	510	0.8	510	-0.19	510	-0.27	510	-0.18	510	510	0	0.063	0.11464
212450	0.13	509	0.88	508	-0.73	510	-0.17	510	-0.6	512	-0.03	510	-0.54	513	-0.34	510	-0.72	517	511	0.897527	-0.235556	0.17241		212450	0.79	510	-0.18	510	0.09	510	-0.38	510	-0.03	510	-0.11	510	0.74	510	-0.33	510	-0.29	510	-0.05	510	510	0	0.025	0.131608
212561	0.46	509	0.57	508	-0.28	510	-0.08	510	-0.26	512	0.01	510	-0.68	513	-0.14	510	-0.66	517	511	0.897527	-0.117778	0.143457		212561	0.67	510	-0.15	510	0.15	510	0.04	510	0.35	510	0.2	510	0.74	510	0.21	510	-0.12	510	0.12	510	510	0	0.221	0.0936951
212671	0.66	509	0.38	508	-0.58	510	-0.5	510	-0.22	512	0.37	510	-0.24	513	-0.62	510	-0.85	517	511	0.897527	-0.177778	0.176059		212671	0.4	510	0.03	510	0.14	510	0.21	510	0.33	510	-0.23	510	0.69	510	-0.02	510	-0.33	510	0.27	510	510	0	0.149	0.0956086
212782	0.61	509	0.46	508	-0.59	510	-0.27	510	-0.31	512	0.23	510	-0.42	513	-0.2	510	-0.81	517	511	0.897527	-0.144444	0.159792		212782	0.66	510	-0.27	510	0.79	510	-0.3	510	0.24	510	-0.03	510	0.57	510	-0.38	510	-0.4	510	0.03	510	510	0	0.091	0.142536
212893	0.71	509	0.5	508	-0.51	510	-0.42	510	-0.47	512	-0.23	510	-0.31	513	-0.4	510	-0.8	517	511	0.897527	-0.214444	0.164428		212893	1.06	510	-0.05	510	0.69	510	-0.15	510	0.38	510	-0.05	510	0.54	510	-0.08	510	-0.4	510	0.08	510	510	0	0.202	0.142515
213004	0.29	509	0.52	508	-0.58	510	-0.5	510	-0.69	512	0.07	510	-0.34	513	0.23	510	-0.87	517	511	0.897527	-0.207778	0.164939		213004	0.52	510	-0.11	510	0.46	510	0.04	510	0.23	510	-0.2	510	0.35	510	-0.22	510	-0.29	510	-0.03	510	510	0	0.075	0.093586
213114	0.53	509	0.63	508	-0.42	510	-0.41	510	-1.07	512	0.36	510	-0.61	513	-0.22	510	-0.95	517	511	0.897527	-0.24	0.207545		213114	0.68	510	-0.15	510	0.36	510	0.13	510	0.53	510	0.23	510	0.6	510	-0.04	510	-0.25	510	-0.01	510	510	0	0.208	0.103105
213225	0.01	509	0.44	508	-0.62	510	-0.3	510	-0.75	512	0.43	510	-0.26	513	-0.6	510	-0.41	517	511	0.897527	-0.228889	0.146235		213225	0.73	510	0.01	510	0.38	510	0.05	510	0.19	510	0.2	510	0.52	510	-0.14	510	0.31	510	0.27	510	510	0	0.252	0.0802745
213336	0.03	509	0.63	508	-0.7	510	-0.31	510	-0.48	512	0.62	510	-0.32	513	-0.35	510	-0.76	517	511	0.897527	-0.182222	0.170878		213336	0.68	510	0.11	510	-0.4	510	-0.14	510	0.07	510	0.02	510	0.36	510	-0.13	510	-0.14	510	-0.09	510	510	0	0.034	0.0955708
213447	0.02	509	0.77	508	-0.86	510	-0.6	510	-0.48	512	0.04	510	-0.34	513	-0.3	510	-0.77	517	511	0.897527	-0.28	0.167407		213447	0.42	510	-0.04	510	-0.4	510	0.24	510	0.29	510	-0.2	510	0.53	510	-0.07	510	-0.29	510	0.44	510	510	0	0.092	0.105333
213558	0.18	509	0.51	508	-0.85	510	-0.31	510	-0.67	512	0.36	510	0.06	513	-0.24	510	-1.08	517	511	0.897527	-0.226667	0.184647		213558	0.48	510	-0.05	510	-0.78	510	0.13	510	0.5	510	0.21	510	0.35	510	-0.25	510	-0.37	510	0.38	510	510	0	0.06	0.132606
213668	0.07	509	0.73	508	-0.55	510	-0.28	510	-0.42	512	0.27	510	-0.11	513	-0.3	510	-1.12	517	511	0.897527	-0.19	0.174786		213668	0.76	510	-0.14	510	-0.71	510	0.22	510	0.43	510	0.13	510	0.47	510	-0.15	510	-0.2	510	-0.08	510	510	0	0.073	0.132833
213779	0.63	509	0.44	508	-0.59	510	-0.25	510	-0.15	512	-0.55	510	-0.53	513	-0.5	510	-0.77	518	511.111	0.992254	-0.252222	0.161476		213779	0.78	510	-0.02	510	-0.31	510	-0.19	510	0.04	510	0.06	510	0.62	510	0.17	510	-0.1	510	0.49	510	510	0	0.154	0.114136
213890	0.68	509	0.39	508	-0.63	510	-0.02	510	-0.68	512	-0.03	510	-0.04	513	-0.05	510	-1.36	518	511.111	0.992254	-0.193333	0.203865		213890	0.46	510	-0.09	510	-0.36	510	0.11	510	0.22	510	0.24	510	0.51	510	0.17	510	-0.04	510	-0.09	510	510	0	0.113	0.0842226
214001	0.24	509	0.74	508	-0.64	510	-0.21	510	-0.45	512	-0.03	510	-0.31	513	-0.27	510	-0.77	518	511.111	0.992254	-0.188889	0.153799		214001	0.67	510	0.22	510	-0.74	510	0.26	510	0.54	510	0.29	510	0.65	510	0.23	510	-0.55	510	0.11	510	510	0	0.168	0.148921
214111	0.5	509	0.47	508	-0.71	510	-0.1	510	-0.33	512	0.23	510	-0.1	513	-0.63	510	-0.93	518	511.111	0.992254	-0.177778	0.172166		214111	0.91	510	-0.01	510	-0.57	510	0.02	510	0.34	510	0.17	510	0.4	510	-0.02	510	-0.25	510	-0.37	510	510	0	0.062	0.134138
214222	0.4	509	0.27	508	-0.54	510	-0.35	510	-0.43	512	0.01	510	-0.1	513	-0.56	510	-0.97	518	511.111	0.992254	-0.252222	0.145486		214222	0.72	510	-0.17	510	-0.08	510	-0.15	510	0.33	510	0.06	510	0.32	510	0.26	510	-0.09	510	-0.09	510	510	0	0.111	0.0913899
214333	0.43	509	0.48	508	-0.85	510	-0.09	510	-0.26	512	0.45	510	0.57	513	-0.14	510	-0.82	518	511.111	0.992254	-0.0255556	0.183599		214333	0.55	510	-0.21	510	-0.73	510	0.13	510	0.3	510	0.13	510	0.7	510	0.07	510	-0.1	510	0.08	510	510	0	0.092	0.126049
214444	0.11	509	0.24	508	-0.67	510	-0.22	510	-0.53	512	0.36	510	0.12	513	-0.49	510	-0.93	518	511.111	0.992254	-0.223333	0.151291		214444	0.88	510	0.08	510	-0.22	510	0.52	510	0.37	510	0.06	510	0.21	510	0.24	510	-0.28	510	-0.12	510	510	0	0.174	0.112143
214554	0.51	509	0.66	508	-0.56	510	-0.19	510	-0.35	512	-0.1	510	0.01	513	-0.49	510	-0.69	518	511.111	0.992254	-0.133333	0.155197		214554	0.63	510	0.22	510	0.09	510	0.09	510	0.35	510	0.01	510	0.71	510	-0.13	510	-0.3	510	-0.24	510	510	0	0.143	0.10792
214665	0.1	509	0.39	508	-0.64	510	-0.31	510	-0.14	512	0.3	510	0.3	513	-0.57	510	-1.05	518	511.111	0.992254	-0.18	0.1668		214665	0.58	510	0.37	510	-0.58	510	0.13	510	0.24	510	-0.39	510	0.46	510	0	510	-0.26	510	0.07	510	510	0	0.062	0.119348
214776	-0.12	509	0.49	508	-0.58	510	-0.21	510	-0.22	512	-0.13	510	0.01	513	-0.78	510	-0.93	518	511.111	0.992254	-0.274444	0.144136		214776	0.54	510	0.15	510	0.38	510	0.3	510	0.5	510	0.37	510	0.86	510	-0.3	510	-0.16	510	-0.14	510	510	0	0.25	0.114756
214887	0.64	509	0.25	508	-0.8	510	-0.29	510	-0.61	512	0.19	510	0.15	513	-0.82	510	-0.62	518	511.111	0.992254	-0.212222	0.177887		214887	0.53	510	0.03	510	0.25	510	0.16	510	0.16	510	0.17	510	0.74	510	-0.1	510	-0.39	510	0.09	510	510	0	0.164	0.0985021
214997	1.28	509	0.57	508	-0.82	510	-0.2	510	-0.75	512	0.37	510	0.19	513	-0.47	510	-0.8	518	511.111	0.992254	-0.07	0.242327		214997	0.67	510	0.1	510	0.11	510	0.33	510	0.34	510	-0.18	510	0.73	510	0.02	510	-0.18	510	0.15	510	510	0	0.209	0.0988427
215108	1.02	509	0.31	508	-0.64	510	-0.39	510	-0.84	512	-0.05	510	-0.01	513	-0.36	510	-0.88	518	511.111	0.992254	-0.204444	0.201874		215108	0.55	510	-0.01	510	-0.24	510	0.58	510	0.34	510	0.2	510	1.03	510	-0.35	510	0	510	-0.21	510	510	0	0.189	0.138343
215219	0.5	508	0.33	508	-0.6	510	-0.11	510	-0.67	512	-0.13	510	-0.35	513	-0.69	510	-0.86	518	511	1.0274	-0.286667	0.157912		215219	0.6	510	-0.22	510	0.46	510	0.56	510	0.35	510	0.1	510	0.96	510	0.04	510	-0.03	510	0.32	510	510	0	0.314	0.110887
215330	1.01	508	0.04	508	-0.61	510	-0.21	510	-0.86	512	-0.25	510	-0.16	513	-0.33	510	-0.88	518	511	1.0274	-0.25	0.189532		215330	0.79	510	-0.04	510	0.26	510	0.31	510	0.47	510	0.11	510	0.68	510	0.12	510	-0.06	510	-0.2	510	510	0	0.244	0.102602
215441	0.08	508	0.22	508	-0.79	510	-0.16	510	-0.63	512	0.23	510	-0.21	513	-0.8	510	-0.46	518	511	1.0274	-0.28	0.136646		215441	0.29	510	0.38	510	0.39	510	0.2	510	0.02	510	0.23	510	0.77	510	0.15	510	-0.36	510	0.13	510	510	0	0.22	0.0913966
215551	0.24	508	0.34	508	-0.71	510	-0.16	510	-1.42	512	0.26	510	0.11	513	-0.49	510	-0.52	518	511	1.0274	-0.261111	0.193502		215551	0.73	510	0.75	510	0.38	510	0.35	510	0.33	510	0.13	510	0.51	510	0.08	510	-0.14	510	0.26	510	510	0	0.338	0.0881514
215662	0.19	508	0.54	508	-0.76	510	-0.14	510	-0.73	512	0.03	510	-0.1	513	-0.33	510	-0.57	518	511	1.0274	-0.207778	0.145007		215662	0.68	510	0.34	510	0.36	510	0.19	510	0.33	510	0.34	510	0.56	510	-0.14	510	-0.05	510	0.06	510	510	0	0.267	0.0812821
215773	0.19	508	0.61	508	-0.62	510	-0.27	510	-0.25	512	0.03	510	-0.42	513	-0.56	510	-0.77	518	511	1.0274	-0.228889	0.146263		215773	0.51	510	0.22	510	0.71	510	-0.22	510	0.5	510	0.2	510	0.39	510	-0.06	510	-0.45	510	0.43	510	510	0	0.223	0.115316
215884	0.53	508	0.24	508	-0.83	510	-0.42	510	-0.69	512	0.28	510	-0.39	513	-0.97	510	-0.63	518	511	1.0274	-0.32	0.179761		215884	0.55	510	0.17	510	-0.32	510	0.23	510	0.43	510	0.28	510	0.52	510	0.29	510	0.32	510	-0.11	510	510	0	0.236	0.0857671
215994	0.31	508	0.23	508	-0.44	510	-0.53	510	-0.7	512	0.17	510	-0.14	513	-0.13	510	-0.81	518	511	1.0274	-0.226667	0.138072		215994	0.66	510	0.38	510	-0.01	510	0.36	510	0.36	510	-0.07	510	0.47	510	0.25	510	0	510	-0.12	510	510	0	0.228	0.0831438
216105	0.59	508	0.4	508	-0.47	510	-0.36	510	-0.84	512	0.31	510	-0.42	513	-0.86	510	-0.86	518	511	1.0274	-0.278889	0.190609		216105	0.57	510	0.41	510	-0.15	510	-0.02	510	0.33	510	0.11	510	0.59	510	-0.22	510	-0.38	510	0.5	510	510	0	0.174	0.111805
216216	0.29	508	0.37	508	-0.55	510	0.1	510	-0.75	512	-0.05	510	0.52	513	-0.65	510	-0.89	518	511	1.0274	-0.178889	0.178555		216216	0.78	510	0.53	510	-0.03	510	0.54	510	0.36	510	0.06	510	0.52	510	-0.07	510	-0.27	510	-0.02	510	510	0	0.24	0.109929
216327	0.11	508	0.14	508	-0.63	510	-0.15	510	-0.76	512	0	510	0.17	513	-0.37	510	-0.68	518	511	1.0274	-0.241111	0.125482		216327	0.51	510	0.7	510	-0.83	510	0.11	510	0.7	510	0.36	510	0.84	510	0.05	510	-0.19	510	0.3	510	510	0	0.255	0.158277
216437	0.33	508	0.69	508	-0.57	510	0.02	510	-0.11	512	0.36	510	0.13	513	-0.38	510	-0.48	518	511	1.0274	-0.00111111	0.141602		216437	0.4	510	0.81	510	-0.53	510	0.3	510	0.28	510	0.38	510	0.12	510	-0.15	510	-0.45	510	0.08	510	510	0	0.124	0.129179
216548	0.3	508	0.44	508	-0.72	510	-0.42	510	-0.3	512	-0.03	510	-0.33	513	-0.48	510	-0.85	518	511	1.0274	-0.265556	0.144165		216548	0.4	510	0.52	510	-0.12	510	0.12	510	0.51	510	0.05	510	0.34	510	-0.37	510	-0.38	510	-0.16	510	510	0	0.091	0.108602
216659	0.43	508	0.24	508	-0.64	510	-0.29	510	-0.59	512	0.23	510	-0.15	513	-0.59	510	-0.55	518	511	1.0274	-0.212222	0.13969		216659	0.59	510	0.51	510	-0.21	510	-0.09	510	0.76	510	0.08	510	0.69	510	-0.09	510	-0.15	510	0.14	510	510	0	0.223	0.11895
216770	0.27	508	0.35	508	-0.62	510	-0.4	510	-0.34	512	0.08	510	0.1	513	-0.28	510	-0.77	518	511	1.0274	-0.178889	0.13203		216770	0.48	510	0.52	510	0.3	510	0.15	510	0.45	510	0.08	510	0.51	510	-0.02	510	0.23	510	0.13	510	510	0	0.283	0.0625042
216881	0.76	508	0.16	508	-0.7	510	-0.02	510	-0.81	512	0.39	510	0.21	513	-0.45	510	-0.86	518	511	1.0274	-0.146667	0.193448		216881	0.86	510	0.68	510	0.05	510	0.06	510	0.29	510	0.08	510	0.59	510	-0.1	510	-0.03	510	-0.07	510	510	0	0.241	0.10963
216991	0.47	508	0.07	508	-0.5	510	-0.23	510	-0.47	512	0.24	510	0.03	513	-0.36	510	-0.62	518	511	1.0274	-0.152222	0.124363		216991	0.58	510	1.12	510	0.11	510	0.24	510	0.53	510	0.09	510	0.75	510	0.06	510	0.12	510	0.04	510	510	0	0.364	0.115789
217102	0.6	508	0.33	508	-0.49	510	-0.28	510	-0.66	512	0.23	510	-0.09	513	-0.72	510	-1	518	511	1.0274	-0.231111	0.179571		217102	0.7	510	1.11	510	-0.66	510	0.61	510	0.33	510	-0.22	510	0.58	510	-0.3	510	0.03	510	0.01	510	510	0	0.219	0.171104
217213	0.28	508	0.23	508	-0.47	510	-0.34	510	-0.53	512	0.44	510	0.28	513	-0.31	510	-0.73	518	511	1.0274	-0.127778	0.14447		217213	0.76	510	1.4	509	-0.7	510	0.38	510	0.27	510	0.04	510	0.38	510	0.19	510	-0.26	510	0.22	510	509.9	0.1	0.268	0.177162
217324	0.68	508	0.25	508	-0.54	510	-0.49	510	-0.65	512	0.02	510	0.07	513	-0.26	510	-0.61	518	511	1.0274	-0.17	0.152023		217324	0.58	510	1.49	508	-0.4	510	0.16	510	0.61	510	-0.35	510	0.68	510	0.02	510	0.32	510	0.15	510	509.8	0.2	0.326	0.175171
217434	0.41	508	0.28	508	-0.56	510	-0.16	510	-0.79	512	-0.07	510	-0.12	513	-0.32	510	-0.29	518	511	1.0274	-0.18	0.124944		217434	0.5	510	1.21	507	-0.21	510	-0.18	510	0.48	510	0.08	510	0.5	510	-0.13	510	-0.08	510	-0.26	510	509.7	0.3	0.191	0.149201
217545	0.57	508	0.26	508	-0.71	510	-0.24	510	-0.69	512	0.15	510	0.33	513	-0.2	510	-0.53	518	511	1.0274	-0.117778	0.156247		217545	0.74	510	0.79	506	-0.12	510	0.45	510	-0.09	510	0.08	510	0.65	510	-0.34	510	-0.11	510	0.24	510	509.6	0.4	0.229	0.128517
217656	0.09	508	0.28	508	-0.86	510	-0.28	510	-0.7	512	0.06	510	0.16	513	-0.34	510	-0.81	518	511	1.0274	-0.266667	0.146979		217656	0.5	510	0.83	506	0.09	510	0.09	510	0.04	510	0.03	510	0.79	510	0.14	510	-0.08	510	-0.04	510	509.6	0.4	0.239	0.107398
217767	0.01	508	0.67	508	-0.7	510	-0.4	510	-0.88	512	0.35	510	-0.15	513	-0.18	510	-0.58	518	511	1.0274	-0.206667	0.166783		217767	0.75	510	0.34	506	0.32	510	0.14	510	0.13	510	0	510	0.63	510	-0.31	510	-0.06	510	-0.01	510	509.6	0.4	0.193	0.102264
217877	0.63	508	0.14	508	-0.58	510	-0.35	510	-0.26	512	0.49	510	-0.17	513	-0.86	510	-0.46	518	511	1.0274	-0.157778	0.164112		217877	0.45	510	0.61	506	-0.31	510	0.32	510	0.39	510	0.08	510	0.7	510	-0.39	510	-0.31	510	0.22	510	509.6	0.4	0.176	0.125097
217988	0.89	508	0.71	508	-0.6	510	-0.21	510	-0.52	512	0.19	510	-0.22	513	-0.18	510	-0.58	518	511	1.0274	-0.0577778	0.182344		217988	0.56	510	0.59	506	0.13	510	0.28	510	0.27	510	0.26	510	0.66	510	-0.35	510	0.04	510	-0.21	510	509.6	0.4	0.223	0.10562
218099	0.5	508	0.47	508	-0.61	510	-0.18	510	-0.53	512	0.33	510	-0.39	513	-0.45	510	-0.72	518	511	1.0274	-0.175556	0.160763		218099	0.45	510	0.85	506	0.07	510	0.24	510	0.36	510	0.3	510	0.28	510	-0.07	510	0.04	510	0.31	510	509.6	0.4	0.283	0.0807747
218210	0.15	508	0.22	508	-0.56	510	-0.35	510	-0.37	512	-0.39	510	-0.49	513	-0.15	510	-1.06	518	511	1.0274	-0.333333	0.128138		218210	0.51	510	0.92	506	0.8	510	0.15	510	0.33	510	0.12	510	0.52	510	0.03	510	-0.23	510	0.23	510	509.6	0.4	0.338	0.111901
218320	0.31	508	0.17	508	-0.64	510	-0.46	510	-0.13	512	-0.01	510	-0.15	513	-0.73	510	-0.84	518	511	1.0274	-0.275556	0.136464		218320	0.77	510	0.81	506	0.35	510	0.35	510	0.55	510	0.2	510	0.31	510	-0.24	510	-0.06	510	0.15	510	509.6	0.4	0.319	0.10534
218431	0.65	508	0.11	508	-0.76	510	-0.27	510	-0.27	512	0.01	510	0.09	513	-0.14	510	-1.02	518	511	1.0274	-0.177778	0.164222		218431	0.59	510	0.76	506	1.08	510	0.33	510	0.34	510	0.22	510	0.56	510	-0.22	510	0	510	0.08	510	509.6	0.4	0.374	0.121776
218542	0.56	508	-0.19	508	-0.8	510	-0.14	510	-0.34	512	0.12	510	0.22	513	-0.51	510	-0.9	518	511	1.0274	-0.22	0.159086		218542	0.82	510	0.82	506	0.7	510	-0.19	510	0.57	510	-0.05	510	0.59	510	0.14	510	-0.43	510	0.09	510	509.6	0.4	0.306	0.142308
218653	0.35	508	0.1	508	-0.66	510	-0.41	510	-0.13	512	-0.04	510	0.15	513	-0.54	510	-0.62	518	511	1.0274	-0.2	0.123221		218653	0.59	510	0.83	506	0.61	510	0.05	510	0.39	510	0.13	510	0.63	510	0.06	510	-0.1	510	-0.04	510	509.6	0.4	0.315	0.105433
218764	0.58	508	0.07	508	-0.58	510	-0.35	510	-0.82	512	-0.38	510	-0.2	513	-0.39	510	-0.79	518	511	1.0274	-0.317778	0.145505		218764	0.55	510	1.05	506	0.14	510	0.09	510	0.52	510	-0.1	510	0.5	510	-0.3	510	-0.37	510	-0.26	510	509.6	0.4	0.182	0.146301
218874	0.31	508	0.27	508	-0.68	510	-0.36	510	-0.09	512	-0.02	510	0.12	513	-0.45	510	-0.33	518	511	1.0274	-0.136667	0.11348		218874	0.38	510	1.22	506	0.5	510	0.22	510	0.37	510	0.05	510	0.23	510	-0.14	510	-0.19	510	-0.23	510	509.6	0.4	0.241	0.135454
218985	0.27	508	0.46	508	-0.46	510	-0.11	510	-0.43	512	-0.32	510	-0.17	513	-0.66	510	-0.79	518	511	1.0274	-0.245556	0.136495		218985	0.61	510	1.05	505	-0.15	510	0.31	510	0.6	510	-0.04	510	0.78	510	-0.37	510	-0.37	510	-0.26	510	509.5	0.5	0.216	0.164588
219096	0.11	508	0.25	508	-0.57	510	-0.21	510	-0.9	512	0.4	510	-0.14	513	-0.66	510	-1.11	518	511	1.0274	-0.314444	0.175239		219096	0.77	510	1.17	504	0.55	510	-0.07	510	0.44	510	0.23	510	0.52	510	-0.28	510	-0.18	510	-0.25	510	509.4	0.6	0.29	0.15342
219207	0.69	508	-0.1	508	-0.56	510	-0.37	510	-0.54	512	0.31	510	-0.22	513	-0.39	510	-0.85	518	511	1.0274	-0.225556	0.157649		219207	0.54	510	0.86	503	-0.2	510	0.27	510	0.33	510	0.3	510	0.6	510	-0.35	510	-0.25	510	-0.01	510	509.3	0.7	0.209	0.126986
219317	0.09	508	-0.02	508	-0.83	510	-0.29	510	-0.81	512	0.1	510	0.27	513	-0.77	510	-0.82	518	511	1.0274	-0.342222	0.155088		219317	0.53	510	0.69	503	0.52	510	-0.02	510	0.3	510	0.11	510	0.31	510	-0.4	510	-0.11	510	0.31	510	509.3	0.7	0.224	0.10501
219428	0.45	508	0.4	508	-0.73	510	-0.18	510	-0.54	512	0.57	510	0	513	-0.27	510	-0.67	518	511	1.0274	-0.107778	0.165057		219428	0.61	510	0.42	503	-0.06	510	0	510	0.42	510	-0.02	510	0.43	510	-0.46	510	-0.01	510	0.07	510	509.3	0.7	0.14	0.101893
219539	0.85	508	0.49	508	-0.75	510	-0.21	510	-0.6	512	0.48	510	0.01	513	-0.62	510	-0.94	518	511	1.0274	-0.143333	0.212224		219539	0.73	510	0.84	503	-0.4	510	0.07	510	0.38	510	0.15	510	0.56	510	-0.05	510	0.04	510	0.17	510	509.3	0.7	0.249	0.120041
219650	0.18	508	0.45	508	-0.49	510	-0.39	510	-0.52	512	-0.16	510	-0.13	513	-0.56	510	-0.77	518	511	1.0274	-0.265556	0.129734		219650	0.32	510	0.99	503	0.06	510	-0.2	510	0.33	510	0.18	510	0.51	510	-0.08	510	-0.21	510	0.11	510	509.3	0.7	0.201	0.114799
219760	0.05	508	0.54	508	-0.49	510	-0.29	510	-0.17	512	0.5	510	-0.26	513	-0.58	510	-0.85	518	511	1.0274	-0.172222	0.156203		219760	0.6	510	0.85	503	-0.42	510	0.06	510	0.31	510	-0.09	510	0.7	510	0.17	510	-0.07	510	0.08	510	509.3	0.7	0.219	0.12549
219871	0.39	508	0.19	508	-0.78	510	-0.37	510	-0.51	512	0.27	510	-0.17	513	-0.46	510	-0.67	518	511	1.0274	-0.234444	0.14246		219871	0.44	510	1.24	503	-0.61	510	0.04	510	0.34	510	0.31	510	0.49	510	-0.37	510	0.15	510	-0.15	510	509.3	0.7	0.188	0.162794
219982	0.35	508	0.16	508	-0.81	510	-0.53	510	-0.65	512	-0.56	510	-0.33	513	-0.55	510	-0.5	518	511	1.0274	-0.38	0.128182		219982	0.57	510	1.03	503	-0.46	510	0.11	510	0.52	510	0.2	510	0.21	510	-0.38	510	-0.43	510	-0.35	510	509.3	0.7	0.102	0.160269
220093	0.16	508	0.49	508	-0.69	510	-0.12	510	-0.45	512	-0.25	510	0.12	513	-0.68	510	-0.67	518	511	1.0274	-0.232222	0.142476		220093	0.54	510	1.11	502	-0.08	510	0.11	510	0.4	510	0.11	510	0.14	510	-0.6	510	-0.36	510	-0.06	510	509.2	0.8	0.131	0.151125
220204	0.02	508	0.65	508	-0.75	510	-0.36	510	-0.45	512	-0.07	510	-0.29	513	-0.46	510	-1.4	518	511	1.0274	-0.345556	0.186466		220204	0.82	510	0.57	501	0.72	510	0.14	510	0.63	510	0.07	510	0.38	510	-0.42	510	-0.35	510	0.6	510	509.1	0.9	0.316	0.139118
220314	0.45	508	0.49	508	-0.63	510	-0.16	510	-0.59	512	-0.47	510	0	513	-0.57	510	-1.16	518	511	1.0274	-0.293333	0.1799		220314	0.46	510	0.65	501	0.66	510	-0.14	510	0.43	510	0.12	510	0.12	510	-0.41	510	-0.19	510	-0.45	510	509.1	0.9	0.125	0.131379
220425	0.2	508	0.13	508	-0.66	510	-0.27	510	-0.77	512	0.08	510	-0.28	513	-0.47	510	-1.02	519	511.111	1.12354	-0.34	0.142595		220425	0.53	510	0.81	501	0.02	510	-0.03	510	0.43	510	-0.02	510	0.37	510	0.03	510	-0.07	510	-0.08	510	509.1	0.9	0.199	0.0986965
220536	0.54	508	0.66	508	-0.58	510	-0.26	510	-0.61	512	0.3	510	0.09	513	-0.2	510	-0.87	520	511.222	1.22222	-0.103333	0.178816		220536	0.27	510	0.59	501	0.66	510	-0.13	510	0.55	510	0.11	510	0.75	510	-0.18	510	-0.17	510	-0.09	510	509.1	0.9	0.236	0.118464
220647	0.48	508	0.63	508	-0.56	510	-0.28	510	0.12	512	-0.1	510	-0.01	513	-0.53	510	-0.62	520	511.222	1.22222	-0.0966667	0.150231		220647	0.74	510	0.74	501	-0.21	510	0.06	510	0.69	510	-0.09	510	0.36	510	-0.25	510	-0.02	510	-0.46	510	509.1	0.9	0.156	0.140943
220757	0.37	508	0.64	508	-0.41	510	-0.33	510	-0.92	512	-0.17	510	0.05	513	-0.63	510	-0.48	520	511.222	1.22222	-0.208889	0.163974		220757	0.57	510	0.42	501	-0.12	510	0.1	510	0.45	510	0.12	510	0.35	510	0.09	510	-0.17	510	0.15	510	509.1	0.9	0.196	0.0774912
220868	0.11	508	0.11	508	-0.35	510	-0.27	510	-0.64	512	-0.02	510	-0.16	513	-0.41	510	-0.27	520	511.222	1.22222	-0.211111	0.0829231		220868	0.66	510	0.29	501	-0.14	510	-0.06	510	0.47	510	0.15	510	0.52	510	-0.26	510	0.06	510	-0.24	510	509.1	0.9	0.145	0.104097
220979	0.04	508	0.15	508	-0.49	510	-0.4	510	-0.75	512	0	510	0.25	513	-0.23	510	-0.55	520	511.222	1.22222	-0.22	0.11601		220979	0.78	510	0.52	501	-0.47	510	-0.45	510	0.32	510	-0.27	510	0.4	510	-0.53	510	-0.16	510	-0.13	510	509.1	0.9	0.001	0.147606
221090	0.13	508	-0.01	508	-0.59	510	-0.34	510	-0.75	512	0.11	510	0.12	513	-0.31	510	-0.37	520	511.222	1.22222	-0.223333	0.108896		221090	0.48	510	0.67	501	-0.45	510	0.12	510	0.27	510	0.35	510	0.42	510	-0.55	510	-0.13	510	0.07	510	509.1	0.9	0.125	0.126318
221200	0.55	508	0.01	508	-0.62	510	-0.19	510	-1.13	512	-0.1	510	-0.08	513	-0.19	510	0.07	520	511.222	1.22222	-0.186667	0.155626		221200	0.52	510	0.68	501	-0.24	510	0.04	510	0.26	510	0.1	510	0.59	510	-0.26	510	-0.22	510	-0.27	510	509.1	0.9	0.12	0.118444
221311	0.3	508	0.05	508	-0.55	510	-0.37	510	-0.82	512	0.02	510	0.21	513	-0.78	510	-0.37	520	511.222	1.22222	-0.256667	0.139503		221311	0.47	510	0.29	501	-0.11	510	0.06	510	0.57	510	0.4	510	0.45	510	-0.48	510	-0.49	510	0.01	510	509.1	0.9	0.117	0.122102
[truncated: 1,212 more rows]

## Sheet: 3 B
wild type	unc-13(n2813)
537.672	537.685
542.709	513.993
550.354	534.591
559.815	542.115
545.904	532.057
543.941	534.935
548.152	536.659
566.172	536.809
558.941	546.337
	526.517
	p-value	sig.
unc-13(n2813) wild type	0.00119	1

## Sheet: 3 C
R input			Capacitance
wild type	unc-13(n2813)		wild type	unc-13(n2813)
1.859	1.415		49.78	49.33
1.313	1.829		52.67	49.63
1.19	1.165		50.01	51.43
1.23	1.313		42.42	53.1
0.972	1.912		42.26	49.87
1.265	0.516		47.61	49.79
1.198	0.358		46.45	42.7
0.757	1.807		43.7	44.68
1.165	1.38		46.33	36.52
1.378			52.48
	p-value	sig.	p-value	sig.
wild type unc-13(n2813)	0.74085	0	0.97022	0

## Sheet: 3 D
wild type
Time	20210914 1-2V	20210914 1-3V	20210914 2-2V	20210914 2-3V	20210916 1-2V	20210916 3-2V	20210916 3-3V	20210917 2-2V	20210917 5-2V	20210917 5-3V	20210920 1-2V
[s]	Vmon [V]	Vmon [V]	Vmon [V]	Vmon [V]	Vmon [V]	Vmon [V]	Vmon [V]	Vmon [V]	Vmon [V]	Vmon [V]	Vmon [V]
0		-1.74
0.0001		-0.93
0.0002		-0.68
0.0003		-1.56
0.0004		1.35
0.0005		-0.65
0.0006		-1.12
0.0007		-0.34
0.0008		-1.9
0.0009		-0.53
0.001		-0.09
0.0011		-0.56
0.0012		-0.87
0.0013		-1.21
0.0014		-1.02
0.0015		0.32
0.0016		-0.49
0.0017		-0.49
0.0018		-0.93
0.0019		-1.37
0.002		-0.28
0.0021		-0.03
0.0022		-1.02
0.0023		0.16
0.0024		-1.56
0.0025		-1.06
0.0026		0.13
0.0027		-0.65
0.0028		-0.15
0.0029		-0.12
0.003		-0.78
0.0031		-0.4
0.0032		0.32
0.0033		-0.93
0.0034		-0.99
0.0035		-1.31
0.0036		-0.96
0.0037		-0.49
0.0038		-0.49
0.0039		-1.71
0.004		-1.59
0.0041		-1.93
0.0042		0.01
0.0043		0.07
0.0044		-0.43
0.0045		-0.74
0.0046		-0.59
0.0047		-0.93
0.0048		-0.4
0.0049		-0.87
0.005		-1.12
0.0051		-0.37
0.0052		-1.12
0.0053		-0.18
0.0054		-1.12
0.0055		-1.09
0.0056		-1.18
0.0057		-1.06
0.0058		-0.93
0.0059		0.04
0.006		-0.18
0.0061		-1.37
0.0062		-1.34
0.0063		-1.02
0.0064		-0.21
0.0065		-0.87
0.0066		-0.81
0.0067		1.66
0.0068		-0.28
0.0069		-0.74
0.007		-0.53
0.0071		0.1
0.0072		-1.18
0.0073		-0.84
0.0074		-0.93
0.0075		-1.49
0.0076		-0.49
0.0077		-1.56
0.0078		-0.93
0.0079		-0.43
0.008		-1.27
0.0081		-0.03
0.0082		0.19
0.0083		-0.37
0.0084		-1.15
0.0085		-0.59
0.0086		-2.02
0.0087		-1.52
0.0088		-1.52
0.0089		-1.62
0.009		-0.65
0.0091		0.91
0.0092		-1.4
0.0093		-0.78
0.0094		-0.4
0.0095		0.41
0.0096		-1.31
0.0097		-2.27
0.0098		0.13
0.0099		-0.65
0.01		-1.43
0.0101		-0.84
0.0102		-1.12
0.0103		-2.55
0.0104		0.07
0.0105		-0.71
0.0106		-0.18
0.0107		-0.49
0.0108		-2.12
0.0109		-0.62
0.011		0.07
0.0111		-1.37
0.0112		-0.65
0.0113		0.13
0.0114		-1.52
0.0115		-2.43
0.0116		-0.4
0.0117		-0.28
0.0118		-0.71
0.0119		-1.37
0.012		-1.74
0.0121		-0.59
0.0122		-0.68
0.0123		-0.9
0.0124		-0.56
0.0125		-2.05
0.0126		0.69
0.0127		-0.34
0.0128		-0.65
0.0129		-0.81
0.013		-1.49
0.0131		-1.77
0.0132		-0.96
0.0133		-1.8
0.0134		0.32
0.0135		0.19
0.0136		-1.77
0.0137		-0.84
0.0138		-0.9
0.0139		-0.81
0.014		-1.21
0.0141		-2.24
0.0142		-1.52
0.0143		-0.56
0.0144		-0.68
0.0145		-0.53
0.0146		-1.31
0.0147		-1.84
0.0148		-1.21
0.0149		-1.31
0.015		-0.34
0.0151		-0.37
0.0152		-1.99
0.0153		-0.53
0.0154		-2.24
0.0155		-1.43
0.0156		-0.68
0.0157		0.04
0.0158		-1.49
0.0159		-0.56
0.016		0.16
0.0161		1.13
0.0162		-0.4
0.0163		-1.71
0.0164		-0.56
0.0165		-0.28
0.0166		-0.28
0.0167		-0.4
0.0168		0.19
0.0169		-1.21
0.017		-1.46
0.0171		-0.9
0.0172		-0.59
0.0173		0.25
0.0174		-0.81
0.0175		-1.02
0.0176		-0.71
0.0177		-1.65
0.0178		0.1
0.0179		-0.62
0.018		-0.74
0.0181		-0.34
0.0182		-0.84
0.0183		-0.93
0.0184		-0.43
0.0185		0.44
0.0186		-1.21
0.0187		-1.24
0.0188		0.38
0.0189		-0.84
0.019		-0.4
0.0191		-0.62
0.0192		-0.78
0.0193		-0.43
0.0194		-0.9
0.0195		-0.4
0.0196		0.38
0.0197		-0.78
0.0198		-1.56
0.0199		-0.81
0.02		-1.27
0.0201		-0.59
0.0202		1
0.0203		-1.15
0.0204	0.3	0.1
0.0205	-1.17	-1.12
0.0206	-0.36	-0.28
0.0207	-0.04	-1.34
0.0208	-0.54	-0.78
0.0209	-0.45	-0.81
0.021	0.27	-1.18
0.0211	0.33	-0.87
0.0212	0.98	-1.43
0.0213	-0.51	-0.21
0.0214	1.83	-0.81
0.0215	-0.01	-0.74
0.0216	0.05	-0.93
0.0217	0.39	-0.78
0.0218	0.39	0.29
0.0219	0.58	-0.28
0.022	-0.23	0.41
0.0221	-0.33	-0.34
0.0222	-0.04	-0.06
0.0223	-0.79	-0.68
0.0224	0.17	-0.28
0.0225	-1.2	-0.56
0.0226	0.89	-1.93
0.0227	1.33	-0.53
0.0228	0.08	0.29
0.0229	0.45	-0.93
0.023	0.17	-0.03
0.0231	0.42	-0.68	-0.29
0.0232	-0.82	-1.34	-0.38
0.0233	-0.39	-0.65	-0.72
0.0234	-0.51	-0.87	-1.97
0.0235	0.27	-0.59	-1.1
0.0236	-0.67	-2.9	-1.1
0.0237	-1.7	-0.15	-0.91
0.0238	-0.54	-0.31	-1.69
0.0239	-0.64	-1.31	-1.13
0.024	-0.11	-0.31	-0.51
0.0241	0.86	0.19	-1.07
0.0242	-0.14	-0.9	-0.69
0.0243	0.08	-0.56	-1.1
0.0244	-0.61	-0.9	-0.63
0.0245	-1.04	-1.09	-0.66
0.0246	0.64	1.19	-1.41
0.0247	0.08	-0.24	-1.1
0.0248	-0.48	-0.81	-1.1
0.0249	-0.79	0.13	-1.07
0.025	-0.45	-1.37	-1.32
0.0251	-0.23	0.41	-1.07
0.0252	0.24	-0.21	-1.82
0.0253	-0.54	-1.62	-1.32
0.0254	-0.73	-1.77	-1.35
0.0255	-0.11	-1.74	-1.32
0.0256	-0.33	-0.53	-0.82
0.0257	0.45	1.63	-0.97
0.0258	0.33	-0.59	-1.04
0.0259	-0.04	-1.62	-1.75
0.026	0.27	1.16	-1.04
0.0261	0.11	-0.49	-0.91
0.0262	-0.23	1	-0.97
0.0263	-1.04	-1.09	-1.04
0.0264	0.45	0.5	-2.25
0.0265	-0.04	0.38	-0.91
0.0266	0.39	-0.59	-1.63
0.0267	-0.2	0.19	-1.07
0.0268	0.8	1.78	-0.94
0.0269	1.36	-1.34	-0.32
0.027	0.7	-1.02	-1.04
0.0271	-0.42	-1.12	-1.13
0.0272	-1.17	-1.4	-1.38
0.0273	0.24	1.13	-1.07
0.0274	1.08	-0.37	-0.82
0.0275	-0.33	-0.06	-0.66
0.0276	-0.54	0.04	-0.82
0.0277	-0.39	-2.15	-1.63
0.0278	-0.45	-0.18	-0.82
0.0279	0.14	0.54	-0.63
0.028	1.64	-1.06	-0.72
0.0281	-0.89	-1.37	-1.47
0.0282	-0.29	-0.06	-1.16
0.0283	-0.14	-0.09	-1.41
0.0284	0.61	0.41	-1.22
0.0285	0.77	-0.12	-1.26
0.0286	0.42	-0.93	-1.5
0.0287	-0.23	0.41	-1.94
0.0288	-1.45	-1.8	-1.44
0.0289	-0.61	-0.65	-2.16
0.029	-0.48	-0.56	-1.94
0.0291	-0.04	-1.37	-1.57
0.0292	-0.89	-1.18	-0.57						-1.41
0.0293	-0.76	-0.81	0.02						-1.94
0.0294	-0.51	-0.59	-1.79						-1
0.0295	-0.42	-0.4	-0.79						-1.63
0.0296	0.17	0.72	-0.82						-0.38
0.0297	0.58	-0.15	0.59						-0.69
0.0298	-0.42	-0.9	-0.82						-1.19
0.0299	0.17	-0.99	-1.13						-1.25
0.03	1.2	-1.15	-0.88						-0.38
0.0301	-0.36	-0.34	-0.57						-0.6
0.0302	0.27	-1.43	-1.82						-0.5
0.0303	-0.11	0.25	-0.6						-1.31
0.0304	0.52	-0.43	-0.44						-1.53
0.0305	-0.33	-0.93	-0.97						-1.41
0.0306	-0.2	0.38	-0.94						-0.41
0.0307	-1.04	0.38	-1.26						-1.81
0.0308	-0.17	-1.02	-1.01						-0.97
0.0309	-1.04	-1.27	-0.82						-0.81
0.031	-0.39	-0.46	-1.01						-1.25
0.0311	-0.33	-1.02	-0.94						-1
0.0312	0.49	-1.43	-1.07						-0.25
0.0313	0.98	0.6	-1.01						-1.13
0.0314	-0.33	-2.12	-1.1						-1.41
0.0315	-0.79	-1.46	-0.91						-1.03
0.0316	-0.42	-1.74	-0.94						-1.41
0.0317	0.64	0.75	-1.82						-0.94
0.0318	1.86	-0.24	-0.13						-0.41
0.0319	0.39	-1.09	-0.72						-1.5
0.032	-0.58	0.07	-0.91						-2.41
0.0321	0.64	-0.71	-1.01						-1.22
0.0322	0.2	-0.65	-0.82						-0.69
0.0323	0.52	0.47	-1.29						-2.12
0.0324	1.42	-1.31	-1.13						-2.41
0.0325	-0.82	-0.84	-0.51						-1.13
0.0326	-0.42	-0.24	-1.13						-0.94
0.0327	-0.54	-1.37	-0.16						-1.19
0.0328	-0.51	-1.24	-0.48						-0.56
0.0329	1.36	-0.71	-1.32						-0.56
0.033	-0.33	-1.52	-1.82						-1.22
0.0331	0.67	-0.15	-1.04						-0.91
0.0332	0.45	-1.27	-0.26						-1
0.0333	-1.48	-1.27	-1.38						-1.03
0.0334	0.24	0.54	-1.29						-0.72
0.0335	-0.33	-0.28	-2.07						-0.56
0.0336	-1.01	-1.18	0.09						-1.09
0.0337	-0.14	-0.31	-1.29						-2.19
0.0338	-0.51	-0.21	-1.01						-0.84
0.0339	0.7	-1.43	-1.07						-1.13
0.034	0.95	-1.34	-0.51						-1.69
0.0341	-0.64	-1.06	-0.79						-1.13
0.0342	-0.98	-0.31	-1.63						-0.91
0.0343	-0.26	-0.37	-1.04						-2.5
0.0344	-0.79	-1.06	-1.01						-1.09
0.0345	0.2	-1.4	-0.82						-2.19
0.0346	0.33	-0.78	-0.94						-1.84
0.0347	-1.11	-0.9	-1.04						-1.44
0.0348	-0.01	-0.81	-1.63						-0.78
0.0349	0.2	-1.9	-1.26						-0.63
0.035	-0.61	0.47	-0.35						-1.13
0.0351	0.2	-0.71	-1.19						-0.13
0.0352	-0.89	-1.06	-1.38						-1.47
0.0353	-0.04	-0.43	-1.16						-1.09
0.0354	-0.04	-1.4	-0.51						-0.47
0.0355	-0.17	-1.93	-0.72						-1.09
0.0356	1.05	-1.43	-0.82						-0.47
0.0357	0.24	-0.56	-1.13						-1.09
0.0358	-0.42	-0.34	-0.82						-2.19
0.0359	-0.45	-0.12	-0.69						-1.22
0.036	-0.92	-0.12	-0.97						-1.19
0.0361	0.36	-0.34	-0.32						-1.84
0.0362	0.45	-0.06	-0.97	-5.35					-1
0.0363	-1.82	-0.87	0.49	-5.13					-1.28
0.0364	0.45	-0.84	-1.1	-4.88					-0.84
0.0365	-0.17	-0.99	-1.72	-5.04					-0.75
0.0366	-0.45	-0.68	-0.76	-4.29					-0.78
0.0367	0.24	-0.87	-0.35	-4.41					-0.53
0.0368	0.95	0.13	-0.07	-5.38					-1.16
0.0369	-0.64	-1.12	-1.22	-5.82					-0.84
0.037	0.36	-1.09	-1.32	-4.69					-0.84
0.0371	-0.89	-1.37	-0.07	-5.1					-1.31
0.0372	0.17	-1.02	-1.13	-4.97					-0.88
0.0373	0.17	-0.53	-2.07	-4.82					-1.22
0.0374	-1.2	0.6	-0.79	-4.72					-1.78
0.0375	0.42	-0.62	-0.13	-4.72					-1.47
0.0376	-0.73	-0.93	-1.1	-5.85					-0.81
0.0377	0.05	-0.62	-1.29	-5					-0.81
0.0378	0.49	1.72	-0.63	-4.38					-1.19
0.0379	-0.48	0.19	-0.88	-4.91					-1.25
0.038	-0.45	-1.15	-1.1	-5.38					-0.84
0.0381	-0.14	0.38	-0.72	-4.79					-1.19
0.0382	-0.89	-0.59	-0.94	-5.53					-0.6
0.0383	-0.73	-2.34	-1.5	-4.94					0.53
0.0384	2.45	0.04	-1.07	-5.13					-1.13
0.0385	-0.61	-0.74	-0.88	-5.07					-0.94
0.0386	0.89	-0.93	-1.35	-4.79					-0.38
0.0387	0.08	0.19	-1.82	-5.38					-1.78
0.0388	-0.48	-1.71	-2.07	-4.97					-1.41
0.0389	0.3	-0.34	-1.54	-5.07					-1
0.039	-1.11	-0.09	-1.38	-4.82					-1.5
0.0391	-1.45	-0.53	-0.32	-5.16					-1.13
0.0392	-0.01	-1.21	-1.29	-5.5					-0.97
0.0393	-0.2	-1.84	-0.76	-5.07					-1.38
0.0394	0.49	-0.12	-0.91	-4.91					-2.62
0.0395	-0.67	-0.15	-1.19	-4.04					-1.25
0.0396	-0.51	-0.49	-0.72	-5.41					-0.91
0.0397	-1.45	-0.12	-0.54	-5.38					-1.16
0.0398	0.45	-0.9	-0.13	-4.88					0.09
0.0399	-0.39	-0.81	-0.82	-4.51					-0.38
0.04	0.08	-0.37	-0.88	-5.38					-0.5
0.0401	0.05	0.88	-0.88	-4.94					-0.88
0.0402	0.27	-1.06	-0.97	-5.32					-0.38
0.0403	0.3	-0.28	-0.32	-4.75					-1.66
0.0404	-0.33	-1.56	-1.07	-5.16					-1.59
0.0405	0.64	-0.06	-0.76	-5					-0.94
0.0406	0.77	0.94	-0.48	-4.85					-1.09
0.0407	0.8	-1.15	-0.88	-5.35					-1.25
0.0408	0.61	-0.37	-0.82	-5.19					-1.91
0.0409	-0.73	-1.43	-0.91	-5.53					-1.41
0.041	0.64	-0.78	-0.23	-4.19					-1.66
0.0411	0.49	-2.15	-1.13	-5.66					-0.91
0.0412	-0.73	-0.53	-1.6	-6.16					-0.66
0.0413	-0.48	-0.53	-0.41	-4.69					-0.94
0.0414	-1.42	0.38	-0.41	-4.75					-0.97
0.0415	-0.82	-0.81	-1.01	-3.88					-0.88
0.0416	-0.01	-0.87	-1.47	-5.22					-1.09
0.0417	-0.58	-1.49	-1.13	-5.29					-0.78
0.0418	-0.51	-0.34	-0.97	-4.91					-0.56
0.0419	0.86	-1.93	-0.91	-5.44					-0.6
0.042	-0.01	-0.12	-1.22	-5.22					-0.81
0.0421	0.55	-0.37	-0.88	-4.54					-1.19
0.0422	0.2	-1.65	-1.41	-5.22					-1.38
0.0423	-0.23	-1.34	-1.16	-5.53					-0.81
0.0424	-0.48	-0.49	-0.6	-5.29					-1.09
0.0425	0.89	0.13	-1.01	-5.29					-0.81
0.0426	-0.29	0.66	-0.97	-5.25					-1.91
0.0427	1.23	-0.68	-1.1	-4.69					-0.88
0.0428	-1.7	0.07	-0.6	-5					0.15
0.0429	0.33	-0.81	-1.22	-4.82					-0.88
0.043	-0.86	-1.4	-1.47	-5.04					-0.78
0.0431	-0.67	-0.56	-1.07	-5.19					-1.41
0.0432	0.55	-1.15	-0.82	-5.19					-0.81
0.0433	-1.98	-0.43	-0.94	-5.47					-1.28
0.0434	-1.11	-0.37	-1.38	-5.13					-0.19
0.0435	0.3	-1.24	-1.13	-5.16					-1.09
0.0436	-0.58	-0.18	-1.41	-4.75					-1.09
0.0437	0.3	-0.34	-1.01	-5					-0.16
0.0438	-0.26	-2.37	-1.47	-4.44					-0.84
0.0439	-1.14	-0.59	-0.19	-5.29					-1.16
0.044	-1.2	0.44	-0.79	-3.51					-0.75
0.0441	0.58	-0.99	-0.76	-5.41					-1.72
0.0442	0.42	-0.71	-1.26	-5.44					-1
0.0443	-0.04	-0.31	-0.72	-6					-1.47
0.0444	-1.17	-0.93	-0.13	-5.44					-1.47
0.0445	-0.23	-1.02	-1.01	-5.41					-2.09
0.0446	0.83	-0.37	-1.19	-4.35					-1.59
0.0447	-0.36	-1.12	-2.69	-6.03					-1.41
0.0448	0.45	-1.18	-1.04	-4.94					-0.88
0.0449	-1.26	-1.56	-0.1	-5.32					-1.63
0.045	-1.04	-1.06	-1.32	-4.97					0
0.0451	-0.86	-1.09	-1.32	-5.63					-0.72
0.0452	0.61	-0.84	-0.66	-5.97					-1.66
0.0453	1.27	-1.49	-1.6	-5.1					-0.44
0.0454	-0.45	-0.9	-1.01	-4.04					-1.09
0.0455	-0.23	-2.18	-1.82	-4.82					-0.97
0.0456	0.45	-1.62	-1.16	-5.16					-0.75
0.0457	-0.04	-0.71	0.21	-5					-1.47
0.0458	-0.64	-1.15	-0.51	-4.54					-1.34
0.0459	-0.23	0.38	-1.63	-4.75					-0.91
0.046	-0.39	-2.9	-0.76	-4.75					-1.63
0.0461	-1.51	-1.34	-0.82	-4.94					-1
0.0462	1.05	-0.74	-0.82	-4.51					0
0.0463	-0.58	0.16	-0.07	-4.75					-1.44
0.0464	-0.08	0.16	-0.76	-5.53					-1.16
0.0465	-0.95	0.29	-1.38	-4.72					-0.91
0.0466	-1.17	-1.12	-0.97	-5.25					-0.53
0.0467	-1.11	-0.99	0.02	-5.04					-0.69
0.0468	0.17	-0.99	-0.94	-4.51					-0.25
0.0469	-0.39	-0.9	-0.48	-5					-0.38
0.047	0.49	-0.71	-0.76	-5.1					-0.66
0.0471	-0.14	-1.34	-0.57	-5.13					0.5
0.0472	-1.45	-1.87	-1.13	-5					-0.72
0.0473	-0.17	-0.31	-1.32	-5.38					-0.94
0.0474	0.52	-0.43	-1.04	-4.38					-1.38
0.0475	-0.14	0.13	-0.91	-5.16					-0.97
0.0476	0.52	-0.74	-0.88	-5.25					-1
0.0477	-0.7	-0.03	-1.54	-5					-0.35
0.0478	-1.76	0.13	-0.94	-5.82					-0.69
0.0479	-0.61	-1.18	-0.32	-4.54					-1
0.048	-0.04	-0.59	-0.82	-4.69					-0.81
0.0481	0.98	-0.4	-1.41	-5.32					-0.88
0.0482	-0.7	-1.18	-1.01	-5.1					-1
0.0483	-0.7	-1.27	-0.79	-3.91					-0.41
0.0484	0.39	0.13	-1.01	-5.16					-1.13
0.0485	-0.39	-1.18	-1.26	-6					-0.22
0.0486	-0.89	-0.9	-1.41	-3.82					-0.94
0.0487	0.14	-0.34	-1.07	-4.41					-0.13
0.0488	-0.54	-2.21	-0.88	-4.44	-0.43				0.25
0.0489	-1.45	-0.62	-2	-5.19	0.1				-1
0.049	0.98	-1.15	-1.54	-5.04	-0.31				-0.94
0.0491	-1.14	0.75	-1.29	-4.79	-0.34				-1.75
0.0492	0.33	-0.93	0.43	-5.22	0.04				-0.38
0.0493	-0.17	0.29	-1.32	-6	0.79				-0.81
0.0494	-0.17	0.13	-1.63	-5.07	-0.09				-0.56
0.0495	-0.61	-0.65	-1.04	-5.25	0.32				-0.53
0.0496	-0.76	0.25	0.12	-5.35	0.32				-1.5
0.0497	-0.48	-0.43	-0.57	-4.29	1.19				-0.44
0.0498	0.98	-0.46	-1.47	-5.16	0.04				-0.53
0.0499	0.67	-1.52	-1.1	-5.91	-0.81				-0.5
0.05	-0.73	-0.18	-0.41	-5.22	-0.74				-0.63
0.0501	-1.04	-0.53	-0.72	-4.51	0.1				-0.35
0.0502	0.7	-0.49	-1.22	-4.88	-1.59				-0.97
0.0503	-0.54	0.16	-0.6	-5.47	0.88				-1.44
0.0504	-0.73	-0.34	-0.19	-4.82	-0.52				0.15
0.0505	0.45	1.13	-0.29	-5.04	-0.49				-1.25
0.0506	-0.95	-0.93	0.27	-4.63	0.13				-1.34
0.0507	-0.14	-1.24	-1.6	-5.66	-0.81				-0.81		-1.7
0.0508	0.33	-0.71	-1.22	-5.22	-0.09				0.4		-2.88
0.0509	-0.29	-0.53	-0.76	-4.85	-0.09				-0.28		-2.07
0.051	-0.29	-0.06	0.68	-5.47	-0.49				-0.81		-2.16
0.0511	-1.95	-1.71	-0.6	-5.19	-0.49				0.43		-2.1
0.0512	2.08	0.91	-1.5	-5.22	-0.27				-1.25		-1.16
0.0513	-0.54	0.25	-0.82	-5.32	-0.15				0.5		-3.19
0.0514	0.08	-0.31	-0.26	-5.69	-1.12				-0.22		-1.54
0.0515	0.14	-1.84	0.12	-5.16	-0.24				-0.53	--	-1.7
0.0516	0.45	-0.34	-1.22	-5.04	-0.18	1.88			-1.13	--	-2.07
0.0517	-0.17	-1.12	-0.69	-4.6	-0.37	1.16		-2.34	-0.66	--	-2.48
0.0518	0.14	-0.34	-0.19	-5.25	-1.24	1.66		-1.78	-0.1	--	-2.44
0.0519	-1.85	1.47	-0.88	-6.13	-0.18	1.82		-1.91	-0.44	--	-2.16
0.052	0.7	0.07	-0.94	-5.22	-0.81	1.19		-1.66	0.09	--	-1.91
0.0521	0.27	-1.27	-0.69	-5.94	0.32	1.35		-2.25	-0.66	--	-2.48
0.0522	-0.95	-0.74	-0.13	-4.66	-0.4	-0.43		-1.63	-0.56	--	-2.51
0.0523	-0.29	-1.15	-0.6	-5.41	-0.93	0.41		-0.6	-0.63	--	-1.98
0.0524	-0.29	-0.28	-1.19	-5.6	-0.18	1.47	-2.13	-1.87	-0.47	--	-1.88
0.0525	-0.17	-1.15	-0.54	-4.85	0.29	1.75	-2.13	-2.16	-1.25	--	-2.69
0.0526	0.49	-0.06	-0.66	-3.69	0.22	1.28	-2.22	-1.5	-0.72	--	-2.54
0.0527	-1.36	-0.74	-0.79	-5.29	-0.34	1.57	-1.26	-2.22	-1.06	--	-2.76
0.0528	1.58	-0.24	-1.19	-5.53	0.29	0.54	-1.54	-1.63	-0.72	--	-2.19
0.0529	-0.54	-0.49	-0.94	-5.5	0.26	1.47	-1.82	-1.41	-0.41	--	-2.6
0.053	-0.08	-0.15	-0.76	-4.13	-0.62	1.25	-1.94	-1.5	-0.44	--	-2.07
0.0531	-0.29	0.29	-0.88	-5.5	0.1	0.35	-1.85	-1.91	-0.38	--	-2.32
0.0532	0.86	-0.37	-0.76	-5.29	0.47	0.85	-2.01	-2.56	-0.91	--	-2.66
0.0533	-1.04	-0.62	-1.72	-5.04	0.04	1.1	-2.35	-1.25	0.03	--	-1.23
0.0534	-0.67	0.91	-0.57	-4.79	0.66	1.16	-2.47	-1.94	0.12	--	-2.57
0.0535	-0.79	-0.4	0.9	-5.1	0.85	1.25	-1.16	-2.06	-0.84	--	-2.41
0.0536	0.52	0.16	-0.91	-5.72	0.38	-0.03	-2.38	-2.5	0.43	--	-2.82
0.0537	1.36	-1.24	-1.41	-5.25	-0.31	0.01	-1.97	-1	-0.44	--	-2.41
0.0538	-0.29	-0.74	-0.6	-4.69	-0.34	0.6	-2.13	-1.72	-0.25	--	-2.26
0.0539	0.52	-1.56	0.21	-5.19	-0.84	0.88	-0.82	-3.37	0.22	--	-2.23
0.054	-0.17	-1.49	0.02	-4.6	-0.37	0.94	-1.94	-2.5	-0.25	--	-1.76
0.0541	0.14	-0.71	-1.63	-5.32	0.54	0.32	-1.91	-2.47	-0.06	--	-2.66
0.0542	0.55	0.57	-0.38	-4.97	0.51	1.78	-2.26	-2.81	-0.13	--	-2.44
0.0543	-0.54	-1.68	-0.69	-5.53	-1.43	0.63	-2.38	-1.31	-0.25	--	-2.19
0.0544	-0.86	-0.59	-0.94	-5.16	-0.87	1.47	-2.22	-2.25	-1.13	--	-3.07
0.0545	0.55	-0.62	-0.13	-5.72	0.63	0.57	-2.38	-2.03	-0.78	--	-2.23
0.0546	0.08	-0.65	-1.16	-6	-0.96	0.72	-2.94	-2.78	-0.28	--	-2.26
0.0547	0.52	0.47	-0.72	-5.97	-1.71	1.22	-2.1	-2.12	-1.47	--	-1.63
0.0548	-0.17	-0.37	-1.66	-5.66	-0.21	0.35	-0.88	-2.03	-0.5	--	-2.07
0.0549	-0.17	-1.52	-0.19	-5.75	-0.87	0.94	-1.32	-2.66	-0.13	--	-2.85
0.055	-0.79	-0.15	-0.63	-5.88	-0.46	1.38	-2.22	-1.91	0.78	--	-2.6
0.0551	0.45	-1.37	-1.57	-5.63	-0.52	0.88	-2.47	-1.41	-0.22	--	-2.48
0.0552	-0.04	-1.43	-1.04	-5.41	-1.8	2.13	-0.66	-1.44	0.68	--	-2.23
0.0553	1.39	0.1	-0.38	-5.19	-0.62	0.47	-1.94	-2.25	-0.69	--	-2.51
0.0554	-1.01	-1.84	-0.32	-3.97	-0.34	1.85	-2.35	-1.31	-0.88	--	-2.79
0.0555	-0.23	-1.06	-1.1	-5	-0.12	1.88	-2.66	-1.84	-0.31	--	-2.04
0.0556	0.11	-0.34	-0.88	-4.63	0.1	1.16	-1.76	-1.41	0.03	--	-1.48
0.0557	-0.61	-0.18	-0.41	-4.19	0.38	1.53	-1.76	-0.53	-0.28	--	-1.45
0.0558	-0.14	-0.09	-0.72	-5.22	0.16	1.13	-1.13	-0.94	0.06	--	-2.41
0.0559	-0.14	-0.78	-0.72	-4.54	-0.18	0.57	-2.57	-1.94	0.15	--	-3.26
0.056	-0.82	-0.21	-0.76	-5.47	-0.74	0.91	-2.07	-1.38	0	--	-2.48
0.0561	0.24	-0.28	-0.16	-5.1	1.13	0.47	-1.51	-2.37	-0.28	--	-1.91
0.0562	0.33	-1.02	-0.63	-5	-0.06	0.82	-1.19	-1.38	0.62	--	-1.63
0.0563	0.27	-0.37	-1.22	-4.82	-0.52	1.38	-2.85	-2	-0.78	--	-2.41
0.0564	0.17	-0.56	-0.82	-4.88	0.6	1.72	-2.85	-1.75	-0.53	--	-2.16
0.0565	-0.26	-0.43	-0.6	-4.79	0.41	0.72	-1.48	-1.06	0.37	-1.61	-1.88
0.0566	-0.61	0.07	-0.97	-5.32	-0.21	0.57	-1.48	-1.41	-0.6	-1.11	-2.13
0.0567	-1.2	-0.71	-0.94	-5.63	0.6	1.28	-2.5	-1.87	-0.41	-1.33	-3.44
0.0568	0.45	-0.03	-0.79	-4.82	0.35	0.25	-2.72	-1.81	0	-1.36	-2.76
0.0569	-0.48	-0.21	-0.29	-5.94	0.32	0.38	-1.79	-1.91	0.03	-1.36	-2.04
0.057	-0.29	-1.02	-0.94	-5.41	-0.52	0.91	-2.29	-2.19	-0.28	-0.68	-2.38
0.0571	0.58	-0.62	-1.01	-5.82	-0.87	0.88	-2.57	-1.47	-0.28	-1.24	-1.91
0.0572	-0.23	-0.71	-0.63	-5.25	0.04	1.22	-3.04	-1.97	0.25	-0.71	-2.26
0.0573	-0.89	-0.4	-0.01	-4.75	-1.15	0.97	-3.28	-2.19	-0.16	-0.99	-2.04
0.0574	-0.51	0.91	-0.1	-5.25	-0.9	0.75	-2.91	-2.25	-0.25	-2.27	-2.16
0.0575	-0.51	0.6	-0.94	-5.22	-0.18	1.13	-1.94	-1.63	-0.13	-1.89	-1.04
0.0576	-0.64	-0.21	-2.22	-5.35	0.91	0.88	-2.13	-0.85	-0.6	-1.11	-2.82
0.0577	-0.95	0.44	-0.91	-5.1	-0.65	2	-2.38	-1.34	-0.19	-1.49	-2.94
0.0578	0.42	-1.27	0.43	-5.25	0.16	1.16	-2.75	-1.72	0.75	-1.52	-1.2
0.0579	0.17	-1.15	-0.82	-5.04	-0.68	0.75	-1.69	-1.59	-0.44	-1.42	-1.63
0.058	0.24	-1.15	-1.72	-4.72	-0.34	0.5	-2.32	-2.34	-0.5	-1.92	-2.76
0.0581	-0.11	-1.02	-1.01	-5	0.01	0.32	-2.94	-2.06	0.37	-1.33	-2.54
0.0582	0.49	-0.59	0.34	-5.1	-0.81	0.57	-2.13	-1.94	-0.16	-0.8	-2.29
0.0583	-0.17	0.32	-1.54	-5.04	-0.9	1.35	-1.32	-1.78	-0.41	-1.61	-2.88
0.0584	-0.86	-1.24	-1.57	-5.25	0.16	-0.28	-2.01	-1.47	0.37	-0.64	-2.63
0.0585	-0.23	-0.71	-1.01	-5.78	-0.96	0.5	-1.19	-1.13	-0.41	-1.61	-1.73
0.0586	0.05	0.63	0.12	-5.44	-1.21	0.85	-2.1	-1.38	-0.6	-1.52	-2.88
0.0587	-0.7	0.5	-1.6	-3.79	0.01	2.1	-1.23	-0.16	-1.16	-1.14	-2.35
0.0588	-1.7	-0.65	-2	-5.35	-0.84	0.97	-1.23	-0.75	0.06	-0.61	-2.94
0.0589	0.45	-0.31	-1.88	-5.13	-1.37	0.72	-1.85	-1.91	0.03	-1.14	-2.88
0.059	0.39	0.41	-1.32	-6.31	-0.71	0.5	-2.04	-2.12	-0.13	-1.52	-3.16
0.0591	0.8	0.88	-0.76	-5.32	-0.37	1.82	-2.13	-2.22	0.15	-1.77	-2.41
0.0592	-1.36	-0.21	0.18	-5.66	-0.03	1.13	-2.07	-2.06	-0.47	-1.52	-1.6
0.0593	-0.14	-0.74	-0.76	-5.19	1.41	0.63	-1.69	-2.53	-0.5	-1.39	-1.94
0.0594	0.45	-0.15	-1.63	-5.32	-0.18	0.47	-2.38	-1.84	0.59	-0.68	-2.85
0.0595	-0.64	-0.12	-0.76	-4.32	0.35	0.75	-2.07	-0.97	-0.25	-2.2	-2.04
0.0596	0.55	-0.28	-0.26	-5.22	0.63	1.13	-0.79	-0.85	0.09	-1.71	-1.98
0.0597	-0.48	0.47	-0.6	-5.41	0.85	1.97	-1.44	-1.44	-0.25	-1.64	-2.01
0.0598	1.52	0.16	-0.97	-5.35	-1.09	0.6	-1.48	-1.53	-0.28	-1.27	-1.23
0.0599	-0.92	-0.09	-0.91	-4.94	0.57	0.25	-1.63	-1.34	-0.75	-2.52	-1.88
0.06	-0.54	-1.12	-0.01	-5.04	0.79	1	-1.66	-1.59	0.15	-2.24	-2.01
0.0601	-0.04	-0.49	-1.01	-5.66	0.51	1.44	-1.51	-1.06	-0.19	-1.14	-1.51
0.0602	0.55	-1.09	-1.13	-4.85	-0.03	0.85	-2.35	-2.59	-0.35	-2.24	-3.32
0.0603	-0.33	-0.24	-0.72	-5.25	-0.27	-0.37	-2.47	-2.41	-0.31	-1.3	-1.85
0.0604	-1.95	0.91	-0.07	-5.04	-1.05	-0.12	-3.04	-3	0.87	-1.74	-2.94
0.0605	-0.48	0.47	-0.69	-5.29	-0.4	0.47	-1.19	-2.47	-0.69	-1.52	-2.63
0.0606	-0.79	0.22	-0.91	-5.25	0.38	1.5	-1.66	-1.56	-0.41	-1.33	-2.41
0.0607	-0.42	-0.74	-0.44	-4.88	-0.49	0.91	-2.29	-1.87	0.28	-1.83	-2.23
0.0608	-1.26	-0.21	-0.69	-5.72	0.54	1.07	-2.35	-1.78	-0.63	-1.02	-2.26
0.0609	0.55	-1.15	-0.26	-5.22	0.1	0.47	-2.47	-1.47	0.12	-1.02	-2.26
0.061	-1.26	-0.28	-0.54	-4.54	-0.52	-0.28	-1.16	-2	0.65	-1.02	-1.41
0.0611	-0.01	0.1	-0.07	-5.1	-0.81	1.5	-1.85	-2	-0.56	-1.39	-1.79
0.0612	-0.79	0.44	-0.26	-5.57	0.07	0.6	-2.07	-0.85	-0.22	-1.64	-3.32
0.0613	-0.23	0.32	-0.38	-5.41	-0.43	0.5	-2.41	-2.19	-0.63	-2.39	-2.48
0.0614	-0.42	-0.28	-0.04	-3.94	-0.31	1.38	-1.35	-1.44	-0.47	-0.89	-2.38
0.0615	0.89	-0.34	-0.63	-5.25	-0.21	0.63	-1.54	-0.78	-0.13	-1.61	-1.88
0.0616	0.02	-0.56	0.34	-5.63	1.1	2.22	-1.88	-0.25	-0.35	-1.08	-2.26
0.0617	0.39	-0.84	-0.41	-5.16	-0.74	1.44	-2.97	-1.25	-0.22	-1.11	-2.48
0.0618	-0.17	-1.18	-0.82	-4.01	-0.43	0.72	-2.26	-1.97	-0.6	-1.3	-2.41
0.0619	-0.26	0.47	-2.32	-5.29	-0.15	0.94	-1.85	-1.09	-0.6	-1.33	-2.32
0.062	-0.45	0.13	-0.91	-5.47	-0.15	0.88	-1.97	-0.41	-0.19	-0.89	-2.07
0.0621	0.52	-0.09	0.27	-5.32	-0.62	1.66	-2.69	-0.81	0.59	-0.18	-2.69
0.0622	-0.61	-0.15	-0.44	-4.94	-1.43	1.25	-1.54	-0.66	0.22	-1.02	-3.04
0.0623	-0.29	-0.87	-1.54	-4.72	-0.81	1.25	-1.19	-1.34	0.03	-1.8	-3.01
0.0624	-0.2	-0.03	-0.82	-5.82	-1.12	0.82	-1.23	-1.44	-0.69	-1.24	-2.01
0.0625	-0.86	0.82	-0.41	-5.5	-0.77	1.53	-2.22	-0.94	0.06	-1.3	-1.94
0.0626	0.02	0.35	-0.72	-5.78	-1.3	1.03	-1.32	-0.85	0.4	-0.96	-2.26
0.0627	0.67	-0.9	-1.19	-5.44	-0.09	-0.18	-1.66	-1	-0.19	-0.08	-2.6
0.0628	1.39	-0.37	-0.6	-4.41	-0.18	0.82	-1.85	-1.16	-0.25	-1.3	-2.41
0.0629	-0.95	0.22	0.12	-5.29	0.97	0.97	-2.5	-1.63	0.22	-1.17	-1.98
0.063	-0.86	-0.21	-0.72	-5.66	-0.03	0.5	-2.88	-0.97	-0.13	-1.52	-2.72
0.0631	-0.45	0.1	-1.29	-5.19	0.82	1.5	-1.82	-1.06	-0.25	-1.42	-2.38
0.0632	-0.14	-0.43	-0.57	-4.85	0.1	1.13	-2.32	-1.59	0.09	-0.89	-2.82
0.0633	-0.73	0.63	-0.6	-5.25	-0.71	0.22	-1.97	-0.81	-0.19	-0.77	-0.98
0.0634	-0.67	-0.06	-1.07	-5.66	0.72	0.22	-2.32	-1.53	-0.94	-1.95	-2.23
0.0635	-0.76	-0.68	-0.48	-5.25	0.51	1.16	-1.97	-1.53	-0.35	-0.21	-2.23
0.0636	-0.61	-0.4	-0.69	-4.79	-0.52	0.75	-0.91	-1.09	-0.28	-0.96	-2.35
0.0637	0.3	-0.68	-1.38	-5.63	-0.37	0.79	-1.32	-0.66	-0.35	-0.58	-2.72
0.0638	0.61	-1.06	-0.91	-5.78	-0.21	-0.93	-1.51	-1.19	-0.44	-1.67	-3.38
0.0639	-1.42	-0.62	-0.38	-5.16	0.1	0.54	-1.51	-2.75	-0.31	-1.52	-1.82
0.064	0.2	0.1	-1.04	-4.79	0.01	-0.28	-3.47	-0.85	-0.13	-1.55	-3.66
0.0641	-0.14	-0.65	-0.91	-4.94	-1.52	0.79	-2.19	-1.84	0.37	-0.99	-2.97
0.0642	0.61	-1.21	-1.07	-5.5	0.94	1.07	-1.88	-2.5	0.15	0.23	-3.1
0.0643	-0.08	0.35	-0.29	-5.22	-0.12	0.69	-2.94	-1.75	-0.35	-0.33	-1.66
0.0644	0.86	-1.02	-1.1	-4.54	-0.15	1.32	-1.41	-0.97	-0.81	-1.02	-1.76
0.0645	-0.82	-0.24	-0.82	-5.53	0.13	2.06	-1.94	-1.87	-0.13	-0.86	-2.91
0.0646	0.8	-0.68	-0.82	-5.44	0.47	1.41	-1.19	-1.41	-0.53	-1.24	-1.85
0.0647	-0.73	0.1	-0.44	-5.85	0.54	0.79	-1.85	-2.59	-0.63	-0.33	-2.72
0.0648	-0.36	0.07	-0.91	-5.66	0.32	0.5	-2.16	-2.25	0.25	-0.46	-1.98
0.0649	-0.29	-0.06	-1.26	-5.85	-0.21	0.07	-2.38	-1.72	-0.41	-0.99	-2.01
0.065	0.64	-0.15	-0.91	-5.53	-0.4	0.94	-0.73	-1.78	-0.25	-1.74	-2.04
0.0651	-0.33	-1.34	-0.32	-5.19	1.85	0.91	-2.41	-2.5	-0.19	-1.02	-1.41
0.0652	-0.04	-1.56	-0.04	-5.35	-1.02	0.07	-1.44	-1.72	-0.28	-1.24	-1.73
0.0653	-0.26	0.47	-0.82	-4.88	0.01	0.04	-3.28	-1.81	-0.63	-0.11	-1.94
0.0654	-0.51	-0.68	-0.63	-4.69	-1.05	0.75	-2.01	-2.47	0.22	-0.92	-2.66
0.0655	-0.67	-0.78	-0.16	-5.47	-0.4	1.6	-1.54	-1.5	-0.28	-1.61	-2.6
0.0656	0.2	-1.06	-0.88	-5.44	0.41	0.01	-2.19	-1.38	-0.66	-1.52	-1.6
0.0657	0.58	-0.84	0.27	-3.97	-0.21	1	-1.85	-0.47	0.37	-1.17	-1.94
0.0658	0.2	-0.74	-1.04	-5.82	0.57	1.28	-2.35	-1.34	-0.1	0.92	-2.69
0.0659	0.49	0.47	-0.63	-5.97	0.07	1.35	-3.22	-2.16	-0.1	-1.05	-2.19
0.066	0.77	-1.62	-0.63	-5.29	-1.18	0.72	-1.76	-1.44	-0.97	-1.21	-2.07
0.0661	-0.42	0.38	-0.54	-4.63	0.29	1.07	-2.13	-0.97	0	-1.24	-2.26
0.0662	0.17	-0.46	-2.13	-5.16	0.22	0.6	-2.35	-1.38	-0.5	-1.42	-1.6
0.0663	0.33	1.32	-0.26	-5.97	-0.4	1.1	-2.57	-1.13	-0.25	-0.52	-2.51
0.0664	-1.2	0.07	0.09	-4.79	0.72	1.41	-2.29	0.37	0.84	-0.89	-2.85
0.0665	0.86	0.19	-0.82	-4.22	0.35	1.03	-1.54	-1.25	-1.22	-1.08	-1.98
0.0666	0.61	0.47	-1.22	-4.66	-0.15	1.72	-1.57	-1.31	-0.69	-1.52	-1.41
0.0667	-0.61	-0.34	-0.57	-5.5	0.97	0.75	-2.04	-0.69	-0.41	0.07	-2.16
0.0668	0.08	-0.24	-0.01	-5.35	-0.43	1.22	-2.1	-1.25	0.09	-1.11	-2.76
0.0669	-0.89	-1.93	-0.76	-5.35	0.57	0.32	-1.57	-1.25	0.12	-1.52	-2.07
0.067	-0.89	-0.65	-1.22	-5.44	1.44	0.97	-2.47	-1.09	-0.22	0.04	-1.88
0.0671	0.36	-0.24	-1.04	-5.38	0.79	-0.62	-1.97	-1.38	0.28	-1.74	-1.91
0.0672	0.02	-0.06	0.27	-4.97	1.35	0.29	-3.19	-1.31	-1.5	-0.64	-1.38
0.0673	0.49	-0.03	-0.97	-5.53	-0.12	1.16	-4.66	-1.22	0	-0.99	-2.66
0.0674	0.14	-0.9	-1.44	-5.04	-0.81	1.53	-3	-1.66	0.12	-0.77	-2.26
0.0675	-0.01	0.47	-0.29	-5.19	-0.12	1.28	-2.44	-0.56	0.72	-1.83	-1.94
0.0676	-0.73	-0.81	-1.41	-5.38	0.22	0.66	-3.41	-1	-0.44	-1.08	-2.23
0.0677	-0.92	-0.56	-0.32	-5.29	-0.96	1.07	-2.63	-1.16	-0.35	-0.92	-2.82
0.0678	-0.42	0.32	0.27	-5.25	0.38	1.66	-1.79	-1.38	-0.25	-1.08	-2.97
0.0679	-0.58	-0.9	-0.72	-4.66	0.19	0.5	-1.44	-1.5	-0.1	-0.68	-1.94
0.068	-0.64	-0.56	-1.32	-5.07	-0.27	1.38	-1.97	-1.28	0.22	-1.05	-2.04
0.0681	1.95	0.75	-0.91	-5.22	0.35	0.16	-2.54	0.12	-1.09	-1.08	-2.26
0.0682	0.67	0.13	0.37	-5.22	-0.31	1.03	-1.94	-1.09	0.03	-1.74	-2.01
0.0683	-0.98	-0.84	-0.72	-4.97	-0.37	1.91	-1.91	-1.69	-0.56	-1.08	-1.1
0.0684	-0.42	-1.06	-1.16	-5	-0.34	-0.06	-0.76	-0.5	-0.6	-1.17	-0.73
0.0685	-0.86	-0.84	-1.22	-4.97	-0.96	0.44	-2.19	-1.59	0.03	-0.86	-1.88
0.0686	-0.67	-1.68	-1.04	-5.66	-0.27	0.82	-1.72	-0.81	-1.06	-0.86	-2.76
0.0687	-0.14	0.13	-0.72	-5.1	0.69	1.28	-1.79	-2.47	0.12	-1.36	-2.41
0.0688	-0.26	0.47	-1.72	-5.13	-1.15	1.88	-1.26	-0.94	-0.84	-1.74	-1.82
0.0689	0.14	0.13	-1.6	-4.72	1.04	1	-1.72	-1.72	0.22	-1.17	-1.91
0.069	0.55	-1.02	-1.91	-5.72	-0.12	1.13	-2.54	-1.56	0.15	-1.52	-1.98
0.0691	-0.67	1	-1.13	-6.31	-0.34	0.22	-2.47	-1	-0.25	-1.33	-2.51
0.0692	0.39	-0.84	-1.47	-5	-0.15	-0.12	-1.32	-1.09	0.28	-0.46	-2.97
0.0693	1.08	-0.81	-1.01	-5.1	-1.02	1.53	-1.66	-0.19	-0.28	-1.52	-1.82
0.0694	-0.42	-1.12	-0.97	-4.97	-0.49	1.16	-1.32	-0.22	-0.44	-1.36	-1.7
0.0695	-0.36	0.5	-0.85	-5.04	-0.4	0.91	-1.82	-2.25	-0.38	-0.92	-2.82
0.0696	-0.54	0.91	-0.32	-4.22	0.41	1	-1.82	-1.59	0.15	-1.42	-3.1
0.0697	0.17	-0.99	-0.54	-5.53	-0.03	-0.87	-1.32	-1.5	-0.47	-1.14	-2.19
0.0698	-0.48	0.94	-0.32	-4.72	0.63	1.35	-1.23	-0.88	-0.13	-0.8	-1.13
0.0699	-1.04	-0.28	-0.6	-5.13	-1.34	0.91	-0.54	-1.34	-0.41	-1.21	-1.88
0.07	-0.26	-1.02	-0.41	-6.16	-0.87	0.22	-1.38	-0.91	-1.03	-2.02	-2.35
0.0701	-0.58	0.01	-0.51	-4.85	0.91	0.16	-0.69	-1.19	0.59	-1.39	-2.63
0.0702	-1.7	0.16	-0.29	-4.91	-0.68	0.72	-1.1	-1.22	-0.25	-1.36	-2.13
0.0703	0.61	0.25	-0.66	-4.85	0.47	0.01	-1.63	-1	-0.35	-1.33	-1.7
0.0704	0.45	-0.71	-0.94	-5.97	0.72	0.75	-2.35	-0.22	-0.44	-0.8	-1.98
0.0705	0.3	1.16	0.24	-5.38	-1.09	1	-2.41	-1.38	0.4	-1.74	-2.88
0.0706	-1.01	-0.4	-0.51	-4.85	0.19	0.6	-2.85	-1.72	0	-1.36	-2.26
0.0707	-0.11	0.16	-0.48	-5.16	0.88	0.72	-2.91	-1.22	-0.72	-1.3	-2.41
0.0708	-0.36	-0.24	-0.94	-5.63	-0.34	1.1	-1.41	-0.63	0.72	-1.3	-2.51
0.0709	1.95	0.25	-1.79	-5.35	-0.15	0.88	-1.88	-1.28	-0.44	-0.86	-2.23
0.071	-0.73	0.13	-0.41	-5.13	-0.24	1.6	-1.48	-1.31	-0.56	-1.42	-2.69
0.0711	-0.17	-1.06	0.24	-5.29	-0.31	1.28	-1.69	-0.97	-0.16	-1.14	-2.13
0.0712	-0.36	-0.31	-0.57	-5.19	-0.37	0.35	-1.38	-0.75	0.81	-1.61	-2.88
0.0713	-0.67	-0.81	-1.97	-5.29	-0.9	0.97	-1.13	0.03	-0.44	-0.99	-2.69
0.0714	0.67	1.25	-0.54	-5.04	-0.46	0.04	-0.73	-0.47	-0.22	-0.92	-1.85
0.0715	0.11	-0.34	0.02	-5.22	-1.52	1.07	-2.04	-1.38	-0.1	-1.14	-2.19
0.0716	-0.95	-0.81	-0.66	-4.19	-1.02	0.01	-1.91	-0.94	-0.66	-1.77	-3.01
0.0717	-0.04	-0.4	-1.75	-4.97	0.63	0.69	-1.69	-1.66	-0.47	-1.36	-0.85
0.0718	-0.82	0.38	-1.35	-5.44	0.19	0.94	-1.85	-0.44	-0.28	-0.11	-2.16
0.0719	1.27	0.85	-0.69	-4.91	-0.43	0.16	-1.76	0	-0.38	-1.39	-2.48
0.072	0.95	0.16	-1.41	-4.54	0.54	-0.24	-2.91	-0.19	-0.91	-0.86	-1.41
0.0721	0.14	0.63	0.15	-5.25	-0.18	0.44	-2.66	-2	-0.66	-2.3	-2.19
0.0722	-0.51	-0.53	-0.91	-6.13	0.54	1.1	-1.66	-0.88	0	-1.71	-1.88
0.0723	-0.14	-0.12	-1.07	-5.19	0.22	0.75	-2.04	-0.81	-0.13	-1.64	-2.1
0.0724	-0.89	0.75	-1.04	-3.76	0.1	-0.34	-2.57	-0.47	0.31	-0.86	-2.44
0.0725	2.17	-0.68	-0.1	-5.25	-0.49	0.38	-1.69	-0.31	-0.25	-1.39	-2.26
0.0726	1.27	0.22	-0.79	-5.38	-0.46	0.32	-2.01	-0.72	0.22	-2.67	-2.1
0.0727	-0.42	1	-1.44	-6	-0.62	1.28	-2.26	-1.41	-0.25	-1.27	-1.66
0.0728	0.52	0.01	-0.01	-5.22	-0.15	0.6	-1.88	-0.88	-0.22	-0.99	-2.19
0.0729	-0.7	-0.15	-0.19	-4.88	0.13	0.94	-2.01	-0.5	0.22	-1.33	-1.73
0.073	-0.61	-0.09	-0.76	-5.29	0.13	0.41	-0.85	-1.22	-0.44	-0.77	-1.73
0.0731	1.11	-0.9	-1.35	-5.16	0.57	1.13	-1.41	-0.91	0.22	-1.02	-1.63
0.0732	-0.23	-0.68	-1.07	-5.44	0.01	0.72	-2.19	-0.72	-0.66	-1.3	-2.69
0.0733	-1.82	0.66	-0.48	-5.07	-0.71	0.82	-1.72	-0.94	-0.47	-1.11	-1.38
0.0734	-1.23	-0.59	-0.97	-4.54	0.07	0.41	-0.94	-0.72	-0.03	-1.14	-1.98
0.0735	-1.79	-0.53	-1.22	-5.41	-0.27	0.44	-1.94	-1.53	-0.44	-1.11	-2.26
0.0736	0.98	-0.03	-0.82	-4.91	0.04	0.35	-1.76	-1.13	-0.84	-1.52	-1.82
0.0737	0.33	0.13	-0.01	-4.41	0.16	0.35	-2.26	0	0	-1.42	-1.76
0.0738	0.49	-0.21	-1.16	-5.04	-0.09	-0.28	-1.66	0.37	-0.63	-1.46	-2.38
0.0739	-0.98	-0.78	-1.16	-5.07	-0.62	-1.52	-2.04	-1.28	-0.1	-1.33	-1.94
0.074	0.39	0.35	-0.82	-4.47	-0.62	0.41	-1.16	-1.25	0.25	-0.89	-1.85
0.0741	-0.76	-0.53	-0.51	-5	-0.46	0.25	-2.41	-2.09	-0.6	-0.96	-1.88
0.0742	0.3	-0.09	-0.82	-5.35	-1.21	0.72	-1.85	-0.5	-0.38	-1.52	-2.44
0.0743	0.49	1.41	-1.19	-6.03	1.07	0.25	-2.26	-0.38	-0.16	-0.71	-2.69
0.0744	-0.23	-0.09	-0.82	-5.35	0.35	0.63	-2.38	-0.38	-1.03	0.01	-2.1
0.0745	0.17	0.07	-0.48	-3.85	0.16	-0.09	-1.51	-1.06	-0.69	-1.49	-2.26
0.0746	-0.48	-0.99	-0.38	-5.78	0.38	1.57	-0.94	-1.25	0	-1.39	-2.57
0.0747	0.89	0.44	-1.19	-6.78	-1.24	0.54	-1.51	-1.5	-1.09	-2.2	-2.44
0.0748	0.2	-0.56	-1.13	-5.63	0.32	0.44	-1.41	-0.94	-0.81	-1.52	-2.19
0.0749	-1.95	1.57	-0.44	-4.97	0.32	0.5	-2.63	-1.25	0.47	-0.96	-2.01
0.075	-0.58	-0.4	0.68	-5.94	-0.31	0.19	-1.57	-0.44	0	-0.96	-1.57
0.0751	-0.86	-2.68	-1.38	-5.88	-0.62	0.88	-2.13	-1.41	-0.91	-1.24	-2.57
0.0752	0.52	-0.93	-1.01	-5.16	0.1	0.32	-1.01	-0.69	-0.41	-0.61	-1.88
0.0753	1.3	-0.15	-0.13	-4.51	-0.46	0.19	-2.75	-1.44	-0.06	-1.17	-1.32
0.0754	-0.01	-0.62	0.31	-5.07	-0.46	1	-2.54	-0.85	-0.16	-1.33	-1.66
0.0755	-0.51	-0.37	-1.04	-5.13	0.6	0.97	-1.88	-0.91	0.03	-0.27	-2.41
0.0756	-0.23	0.38	-2.32	-5	-0.46	1.5	-1.79	-1.09	0.12	-0.92	-2.26
0.0757	-0.92	-1.24	-0.69	-4.69	0.07	0.32	-2.41	-0.88	-0.25	-1.17	-2.44
0.0758	0.58	-0.15	-0.16	-4.88	-0.84	0.69	-1.91	-0.56	-0.28	-0.49	-2.19
0.0759	0.17	-0.06	-0.79	-4.85	-0.84	0.07	-1.63	-0.81	0.81	-1.21	-1.98
0.076	-0.01	0.22	-1.26	-4.35	-0.37	0.79	-1.29	-0.25	0.31	-1.74	-2.69
0.0761	0.49	0.16	-0.32	-5.38	0.63	1.91	-2.22	-1.16	-0.25	-0.46	-2.63
0.0762	-0.01	-0.93	-0.66	-5.44	0.72	0.04	-2.29	-0.47	-0.25	-1.02	-1.23
0.0763	-0.2	-0.15	-0.94	-4.75	0.1	1.19	-2.04	-0.66	-0.38	-1.74	-1.41
0.0764	0.55	0.41	0.09	-4.94	-0.49	0.54	-2.13	-1.94	-0.63	-0.8	-2.91
0.0765	-1.51	-0.28	-1.01	-4.75	-0.96	-0.59	-2.29	-0.75	-0.38	-0.83	-2.57
0.0766	-0.36	0.04	-1.54	-5.16	-0.71	1	-2.82	-0.53	-1.16	-1.02	-3.38
0.0767	-1.32	0.88	-0.82	-3.79	-0.71	0.63	-1.91	-0.81	-0.69	-1.14	-2.13
0.0768	0.02	-0.93	-0.63	-5.04	0.04	0.04	-1.35	-1.38	-0.69	-0.36	-2.1
0.0769	0.64	-1.27	-0.76	-5.44	0.13	1.44	-1.66	-0.63	-0.41	-1.24	-2.26
0.077	-0.92	0.88	-1.26	-5.97	-2.08	-0.21	-1.66	-1.22	0.62	-1.05	-3.01
0.0771	0.08	0.01	-0.54	-4.69	-1.3	0.72	-1.88	-1	0.09	-0.96	-1.66
0.0772	0.33	0.79	-0.38	-5.32	-1.12	0.25	-3.22	-0.25	0.78	-2.49	-2.19
0.0773	-0.14	-0.24	-1.13	-4.97	-0.84	0.72	-3.57	-1.19	-0.35	-0.96	-2.1
0.0774	-0.79	-0.74	-0.44	-4.69	-0.52	0.29	-2.94	-0.81	0.03	-0.92	-1.45
0.0775	1.45	-0.03	-0.97	-5.07	-0.21	1.41	-3.07	-0.53	0.22	-0.68	-1.6
0.0776	-0.36	0.47	-0.54	-5.22	0.94	1.63	-3.35	-0.85	-0.16	-1.61	-2.01
0.0777	-0.39	1.1	-0.94	-5.22	0.1	0.47	-2.63	-0.69	-0.28	-0.99	-2.54
0.0778	-0.04	-0.81	-0.63	-5.07	-1.46	-0.9	-2.57	-1	-0.28	-0.96	-2.69
0.0779	0.36	-0.21	-0.85	-4.72	0.01	0.32	-0.76	-0.41	-0.35	-1.46	-2.51
0.078	0.77	-0.24	-0.63	-5.16	0.85	1.03	-1.66	-1	-1.47	-0.08	-2.26
0.0781	-0.58	-0.09	-1.01	-5	-0.37	0.13	-1.85	-2	0	-0.86	-2.48
0.0782	-0.26	-0.09	-0.76	-5.32	-0.03	0.07	-1.72	-1.25	-0.75	-1.14	-0.95
0.0783	-2.04	0.79	-0.88	-4.82	-0.99	0.97	-2.16	-1	-0.16	-1.36	-2.1
0.0784	-0.58	0.44	-0.63	-4.88	-0.15	-0.09	-2.07	-1.28	-0.1	-0.36	-1.91
0.0785	-0.33	-1.71	-0.82	-5	0.07	1.25	-1.01	-0.94	-0.13	-0.68	-1.45
0.0786	0.11	1.81	-1.57	-5.07	-0.18	0.85	-1.94	-1.5	-0.1	-0.74	-3.32
0.0787	-2.42	0.41	-1.29	-4.85	-1.96	-0.06	-2.41	0.03	0.22	-0.27	-2.72
0.0788	0.42	-0.18	-1.26	-4.94	0.85	0.97	-0.85	-0.28	0.28	-1.49	-2.32
0.0789	-0.23	0.25	-1.57	-4.75	-0.15	0.41	-1.48	-0.81	-0.35	0.54	-2.35
0.079	-1.04	-0.81	-1.5	-4.82	-1.71	0.57	-1.76	-0.85	-0.6	0.14	-2.48
0.0791	0.39	-0.78	-2.97	-4.85	-0.27	1.16	-1.85	-1.16	1.34	-1.14	-2.44
0.0792	0.02	0.47	-0.94	-5.5	-0.03	-0.09	-2.35	-1.13	0.56	-1.21	-2.44
0.0793	-0.98	-0.24	0.06	-5.38	1	0.79	-2.29	-1.91	0	-0.89	-1.98
0.0794	0.2	-0.53	-0.29	-5.16	0.01	1.13	-1.79	-0.31	0.34	-0.52	-1.7
0.0795	-0.33	0.57	-1.57	-4.16	0.07	0.1	-1.94	-0.22	-0.41	-0.18	-2.66
0.0796	0.24	-0.65	-1.29	-4.38	0.57	0.22	-1.91	-0.38	-0.28	-0.43	-2.63
0.0797	0.52	-0.31	0.21	-5.38	1.44	0.13	-2.41	-0.75	0.09	-1.67	-2.26
0.0798	0.64	-1.06	-0.66	-5.35	-0.37	0.6	-0.82	-0.91	-0.44	-1.58	-1.76
0.0799	-0.48	-0.18	-1.04	-5.5	-0.12	0.75	-0.94	-0.5	-0.88	-0.8	-1.98
0.08	0.05	-0.4	-0.51	-4.88	-0.52	0.75	-1.57	-1.59	-1.06	-0.92	-2.6
0.0801	-0.61	-0.37	-0.19	-5.16	-0.37	-0.68	-1.04	-1.28	-0.13	-1.14	-2.38
0.0802	0.2	0.88	-0.66	-5.22	-0.34	0.57	-0.98	-0.5	0	-1.27	-2.01
0.0803	-0.7	0.16	-1.07	-5.13	-0.27	0.97	-1.97	-1	-0.13	-1.14	-1.1
0.0804	0.14	0.66	-1.01	-4.75	0.32	1.03	-1.13	0	0.06	-1.33	-2.44
0.0805	0.64	0.57	-0.94	-6.13	0.79	1.16	-2.16	-0.5	-0.31	-0.8	-1.79
0.0806	-0.64	-1.68	-1.04	-4.44	-1.27	0.6	-1.82	-0.72	-0.63	-0.71	-0.85
0.0807	-0.79	0.66	0.02	-4.97	-0.37	1.41	-2.01	-0.16	0.37	-0.8	-2.51
0.0808	1.33	-0.43	-0.63	-4.13	1.88	0.79	-2.69	0.06	0.09	-1.33	-2.38
0.0809	-1.32	0.22	-1.38	-4.94	-0.93	0.44	-1.54	-0.35	-1.22	-0.52	-2.6
0.081	0.3	0.32	-0.82	-5.1	0.01	-0.18	-2.75	-0.94	0.75	-0.05	-2.13
0.0811	0.67	0.66	-0.16	-5	-1.05	0.57	-2.1	-0.85	0	-1.49	-2.88
0.0812	0.08	-0.53	-0.44	-5.35	-0.24	0.32	-2.41	-1.06	0.31	-0.27	-2.16
0.0813	1.08	-0.59	-1.07	-5.1	0.16	1.16	-1.82	-0.94	0.06	-0.89	-3.22
0.0814	-0.61	-0.4	-0.79	-4.66	-0.65	-0.18	-1.97	-0.63	0.15	-0.74	-2.19
0.0815	-0.76	-0.84	-0.1	-5.13	0.97	0.57	-1.57	-1.19	-0.25	-0.89	-2.41
0.0816	-1.04	0.07	-0.44	-5.32	0.97	0.54	-2.01	-0.75	-0.28	-0.36	-1.82
0.0817	-0.51	0.22	-1.32	-5.1	0.35	0.97	-1.91	-0.78	-0.22	-0.61	-3.41
0.0818	-0.82	-1.24	-1.13	-4.94	0.22	0.01	-2.13	-1.78	0.03	-1.02	-2.85
0.0819	-0.89	0.82	-0.63	-5.04	-0.34	0.38	-1.82	-0.19	-0.13	-0.3	-2.35
0.082	-0.23	0.19	-1.01	-5.53	0.16	0.63	-1.57	-0.75	-0.44	-1.42	-1.98
0.0821	-0.26	0.69	-0.48	-5.75	0.1	1.13	-2.57	-1.72	-0.38	-1.02	-2.23
0.0822	-1.36	0.25	-1.01	-5.07	-0.49	0.01	-1.04	0.18	-0.31	-0.33	-1.91
0.0823	-0.26	0.85	-0.69	-5.25	-0.65	0.1	-1.38	-1	-0.31	-1.64	-2.54
0.0824	-1.45	0.29	-0.26	-5.13	-0.71	0.16	-1.1	-0.44	-0.1	-1.14	-1.94
0.0825	-0.86	-1.09	-1.32	-5.13	-0.93	0.66	-1.94	-0.75	-0.28	-0.74	-2.54
0.0826	1.39	-0.37	-0.82	-5.5	-1.59	0.75	-1.6	-0.22	0.03	0.29	-2.6
0.0827	0.61	0.82	-1.29	-5.04	-0.21	1.13	-2.32	-0.1	-0.35	-1.58	-1.91
0.0828	-1.42	-0.34	-0.94	-5.63	-0.27	0.41	-1.69	-0.44	-0.16	-0.52	-1.88
0.0829	0.42	-0.49	-0.04	-4.38	-0.24	0.57	-1.94	-0.5	-0.28	-1.08	-1.76
0.083	-0.23	-0.62	-1.1	-4.97	-0.4	0.6	-2.13	-0.6	0	-2.27	-2.13
0.0831	-0.76	-0.21	-0.57	-4.97	-0.81	0.97	-2.79	-0.72	-0.72	-0.52	-2.82
0.0832	-0.45	0.01	-0.76	-5.29	-0.46	-0.18	-2.04	0.5	-0.44	-1.33	-2.63
0.0833	-1.92	0.41	-0.94	-4.04	-1.02	-1.09	-0.48	-0.63	0.12	-0.92	-2.1
0.0834	-0.51	0.88	-1.19	-5.16	-0.65	0.13	-0.94	-1.56	-0.1	-1.49	-2.01
0.0835	-0.39	0.94	-0.69	-5.41	0.07	-0.12	-0.98	-0.81	0	-0.58	-2.07
0.0836	-1.45	0.16	0.18	-4.47	-0.27	0.47	-1.23	0.75	-0.6	-1.11	-2.91
0.0837	-1.04	-0.43	-1.07	-4.94	0.19	-0.24	-1.88	-0.5	-0.38	-1.08	-1.23
0.0838	-1.92	0.07	-1.29	-3.79	-0.59	0.04	-1.54	-0.75	0.34	0.2	-1.98
0.0839	-1.32	-0.71	-0.85	-4.54	-0.34	-0.37	-2.04	-0.38	0	-1.21	-2.44
0.084	-1.2	0.72	0.18	-5.32	-0.4	0.6	-2.13	-0.25	-0.28	-0.92	-2.41
0.0841	-1.23	-0.49	-0.88	-5.75	-0.62	0.22	-2.26	-0.19	-0.69	-1.67	-1.73
0.0842	0.27	1.63	-1.5	-5.25	-0.59	-0.62	-1.76	0.22	0	-1.58	-2.16
0.0843	0.05	0.29	-0.76	-4.51	-0.21	0.07	-2.01	-0.44	-0.13	-0.92	-2.19
0.0844	-0.48	-0.28	-0.38	-5.22	0.41	1.28	-1.16	-0.38	-0.53	-0.89	-2.1
0.0845	-0.33	1.22	-0.82	-5.69	-0.62	0.63	-1.23	-0.44	-0.1	-1.39	-1.26
0.0846	-1.32	-0.71	-1.44	-5.91	-0.59	0.44	-2.41	-0.25	-0.75	-0.74	-1.91
0.0847	-1.17	0.13	-0.63	-4.72	-0.65	-0.18	-2.75	-0.63	-1	-1.89	-2.04
0.0848	-0.36	-0.59	-0.91	-5.69	-0.71	0.88	-2.16	-0.69	-0.38	-1.08	-1.51
0.0849	-0.51	1.28	-0.85	-5.85	0.13	1.5	-2.26	-0.16	0.18	-0.83	-2.85
0.085	0.24	-1.49	0.06	-5.69	-0.49	-0.18	-3.35	-0.72	-0.56	-0.99	-2.07
0.0851	0.36	-0.34	-0.57	-4.72	-0.06	0.82	-2.19	-0.66	-1.06	-0.27	-2.26
0.0852	-0.92	-0.65	-1.75	-5.25	0.82	0.79	-1.94	-1.5	-0.5	-1.86	-2.6
0.0853	-1.54	-0.34	-0.97	-5.25	-0.18	0.69	-1.69	-0.5	-0.97	-1.58	-3.07
0.0854	-0.48	-0.56	-0.23	-5.19	-1.34	0.57	-1.38	-0.19	0.93	0.29	-2.51
0.0855	-1.17	0.19	-0.51	-4.85	-0.87	0.04	-1.76	-0.25	0.03	-1.61	-2.19
0.0856	-0.92	0.94	-1.13	-5.19	-0.12	-0.18	-1.91	-1.16	-0.19	-1.14	-2.04
0.0857	-1.7	-0.03	-1.13	-5	-0.65	0.16	-1.94	0.09	-0.38	-1.71	-2.23
0.0858	-1.17	0.44	-1.1	-5.25	-0.52	0.72	-2.13	-0.63	0.37	-1.49	-2.1
0.0859	0.3	-0.21	-1.19	-5.41	-0.62	1.72	-1.38	-0.94	0.09	-0.96	-1.76
0.086	-0.89	-0.59	-1.04	-5.32	-0.9	1.22	-2.35	0.12	-0.69	-1.36	-1.7
0.0861	0.3	2.91	-0.97	-4.79	-1.77	0.5	-1.32	0.31	0.43	-1.3	-1.26
0.0862	-1.11	0.69	-0.76	-5.19	-1.02	1.57	-1.94	-0.5	-0.56	-0.33	-2.13
0.0863	-1.23	1.19	-0.88	-5	0.04	0.97	-2.04	-0.19	-0.19	-1.77	-2.16
0.0864	-0.29	-0.68	-0.82	-5.38	0.1	1	-1.29	0	-0.38	-1.83	-2.13
0.0865	1.05	-0.59	-0.32	-4.82	-0.24	0.32	-1.66	0.12	-0.31	-0.86	-1.73
0.0866	-0.54	0.22	-0.54	-3.97	-1.12	0.6	-2.79	-0.13	-0.56	-0.55	-1.26
0.0867	0.2	0.85	-0.13	-5	-0.43	0.91	-1.94	0.09	-0.41	-1.33	-3.54
0.0868	-1.17	0.19	-0.91	-5.41	-0.24	0.41	-2.63	-0.44	1.06	-0.68	-2.48
0.0869	-1.32	-0.12	-0.69	-4.94	0.69	0.07	-2.44	-0.6	-0.81	-1.33	-1.32
0.087	-1.04	1.35	-0.16	-5.29	-1.77	0.13	-0.35	-0.38	-0.19	-0.77	-2.32
0.0871	-1.32	0.32	-0.76	-3.88	-0.49	0.16	-2.26	-0.69	-0.94	-1.33	-3.57
0.0872	-0.95	1.57	-0.16	-4.29	-0.21	-0.06	-3.5	-0.1	-0.22	-0.77	-2.35
0.0873	-1.26	1.38	-0.94	-5.38	-0.15	1.91	-2.94	0.34	-1	-1.64	-1.48
0.0874	-1.79	0.22	-0.63	-7.16	-0.71	0.54	-3.5	-0.41	0.28	-2.05	-1.94
0.0875	-0.2	0.07	-0.91	-4.79	-0.65	0.04	-2.69	-0.19	-0.44	-1.3	-2.69
0.0876	-0.23	-0.9	-0.82	-5.19	-0.4	0.25	-1.44	0.4	-0.84	-1.21	-2.16
0.0877	-0.61	1.28	-0.91	-4.97	-0.65	0.16	-1.85	-0.56	0.59	-0.49	-2.6
0.0878	-0.04	1.19	-0.51	-6.07	-0.81	0.13	-2.41	-0.5	-0.28	-1.86	-1.88
0.0879	-1.6	0.04	0.59	-5.1	0.07	0.85	-2.19	0.03	-1.31	-1.71	-1.26
0.088	-0.64	-0.09	-1.26	-4.51	0.29	0.5	-2.22	-0.03	-1	-1.83	-2.32
0.0881	0.95	-0.37	-1.01	-5.04	-0.65	1.07	-2.63	-0.22	-0.6	-1.64	-2.54
0.0882	-0.95	-0.15	-0.54	-5.97	-0.56	0.6	-2.26	-0.35	-0.31	-1.11	-2.13
0.0883	-0.61	1.41	0.21	-5.5	0.07	0.79	-1.72	0.25	-0.31	-1.11	-1.54
0.0884	0.24	1.35	-1.29	-4.6	-0.03	0.44	-1.16	-0.16	0.37	-1.74	-3.07
0.0885	-1.04	1.13	-0.97	-5.25	-0.84	1.28	-0.94	-0.38	-0.84	-2.27	-1.94
0.0886	-0.45	1.6	-0.82	-5.6	0.57	0.75	-2.29	0.12	-0.6	-1.27	-2.26
0.0887	-0.2	0.72	-0.57	-4.75	0.07	0.47	-1.76	-0.6	-0.22	-1.24	-2.35
0.0888	-0.29	0.41	-1.38	-4.66	1.6	0.13	-1.54	-0.81	0.56	-1.02	-2.19
0.0889	-2.04	1.75	-1.63	-5	-0.21	1	-0.51	-0.22	0	0.2	-2.23
0.089	-2.1	-0.93	-1.41	-5.22	-0.27	0.72	-0.26	-0.94	0	-1.77	-2.41
0.0891	-1.64	0.38	-1.13	-5.22	-1.18	0.29	-1.94	-0.91	-0.78	-1.02	-1.48
0.0892	-0.92	-0.74	-1.1	-6.07	-0.34	-0.4	-1.85	0.87	-0.28	-1.02	-2.66
0.0893	-0.45	0.6	-1.54	-5.07	-0.4	0.6	-1.41	-0.5	0	-1.02	-2.38
0.0894	-1.04	1.07	-0.76	-4.91	-0.18	0.66	-2.16	0.06	-0.44	-1.92	-2.48
0.0895	-0.89	1.6	-1.54	-5.29	-0.4	0.82	-2.01	-0.66	-0.13	-1.83	-1.2
0.0896	-0.79	0.41	-0.51	-5.22	-1.93	0.57	-1.41	0.15	-0.78	-1.39	-2.01
0.0897	-1.01	-0.56	-0.57	-5.75	-0.84	0.57	-1.91	0.25	-1	-1.27	-2.48
0.0898	-0.2	0.29	-0.29	-4.63	-1.18	1	-1.88	0.03	-0.66	-0.99	-2.07
0.0899	0.05	-0.21	-1.5	-5.47	-0.68	0.97	-1.1	0.25	-0.44	-2.27	-1.85
0.09	0.55	0.32	-0.13	-5.35	-0.77	0.66	-1.38	0.84	-0.35	-1.52	-0.88
0.0901	-2.48	1.16	-0.41	-5.25	0.51	-0.46	-2.13	-0.53	-1.34	-1.89	-1.35
0.0902	-2.26	0.25	-1.1	-4.16	-0.96	0.38	-2.85	-0.5	-0.5	-1.11	-2.76
0.0903	0.52	-0.15	-1.26	-4.97	-1.02	0.35	-2.04	-0.31	-0.75	-1.8	-2.01
0.0904	-1.14	-0.56	-0.97	-6.19	-0.46	0.72	-1.94	0.34	-1.25	-1.42	-1.91
0.0905	-0.92	0.69	-0.19	-5.47	0.35	-0.18	-2.5	0.5	-0.25	-1.52	-3.04
0.0906	-0.04	0.47	-0.72	-4.63	0.32	0.35	-2.69	-0.56	0.28	-1.02	-2.57
0.0907	-1.04	0.41	-1.07	-4.82	-0.84	0.13	-2.13	-0.28	-0.81	-1.21	-2.32
0.0908	-1.11	1.28	-1.1	-5.38	0.19	1.97	-1.35	-0.63	-0.44	-1.46	-2.07
0.0909	-0.42	0.13	-0.63	-5.1	-0.74	0.47	-1.57	-0.63	0.06	-1.14	-2.19
0.091	-0.7	-0.12	-0.88	-5.1	-0.62	0.29	-2.19	-0.6	-0.35	-0.02	-2.35
0.0911	-0.76	0.63	-1.16	-5.41	0.29	0.57	-2.26	0.59	-0.19	-1.42	-2.63
0.0912	-0.92	1.07	-0.82	-4.51	0.19	0.54	-2.16	0.25	-0.25	-1.36	-1.79
0.0913	-2.23	-0.37	-1.22	-5.19	-0.93	0.97	-2.63	-1	-0.91	-0.49	-2.07
0.0914	-0.17	0.88	-0.94	-5.04	-0.24	1.41	-0.69	-0.56	-0.13	-0.8	-2.32
0.0915	-0.29	-0.71	-0.94	-4.79	-0.27	-0.18	-2.5	-0.53	-0.69	-1.24	-2.13
0.0916	0.17	0.82	-1.26	-5.38	-0.12	0.35	-1.76	-0.22	-0.5	-0.96	-2.57
0.0917	-1.32	1.6	-1.47	-5.47	-1.27	0.79	-1.97	-0.66	-2.16	-0.92	-2.01
0.0918	-0.61	0.66	-0.29	-4.91	-0.24	-0.34	-1.26	-0.91	-0.41	-1.46	-2.19
0.0919	0.08	0.1	-0.79	-4.6	0.07	-0.28	-1.01	0.03	-0.66	-0.77	-2.69
0.092	-1.04	-0.49	-0.07	-5.38	-0.4	0.47	-1.72	0.18	-0.5	-0.92	-1.35
0.0921	0.08	-0.49	-0.41	-5.35	-0.46	0.41	-2.5	-0.66	-0.22	-1.77	-3.16
0.0922	0.58	-0.31	-0.66	-5.19	-0.37	0.19	-2.57	-0.35	-1.44	-1.64	-2.32
0.0923	-1.73	0.32	-0.41	-5.16	0.32	0.22	-2.01	-0.07	-0.5	-1.05	-2.85
0.0924	-0.89	-0.06	-1.57	-5.16	-1.49	0.04	-1.88	-0.07	-0.94	-1.83	-2.48
0.0925	-1.85	1.44	-0.6	-5.85	-0.49	0.35	-1.29	0.34	-0.5	-0.24	-1.32
0.0926	-0.04	0.54	-0.1	-4.97	-0.68	0.54	-2.16	0.03	-0.06	-0.68	-1.85
0.0927	-0.86	0.5	-0.88	-4.91	-0.52	1.07	-2.97	-0.85	-0.28	-1.17	-2.19
0.0928	-1.23	1.41	0.59	-5.44	-0.62	1.1	-2.22	-0.41	-0.16	-1.17	-2.07
0.0929	-1.42	-0.15	-1.01	-5.29	-0.93	0.47	-2.22	0.34	-0.5	-1.17	-1.91
0.093	-0.7	0.5	-0.48	-4.85	-0.27	0.66	-1.48	-0.22	-0.13	-1.67	-2.19
0.0931	-0.58	-0.09	-1.6	-5.22	-0.31	0.01	-2.75	-0.25	-0.75	-0.89	-2.1
0.0932	0.17	-0.03	-1.38	-5.72	-0.87	-0.03	-2.69	0.68	-0.84	-0.39	-1.76
0.0933	0.45	1.07	-1.72	-5.6	-0.49	-0.65	-2.16	-0.1	-0.81	-1.58	-1.23
0.0934	-1.67	-0.56	-0.48	-5.53	-1.99	-0.21	-1.82	0.5	0.18	-1.61	-1.51
0.0935	-2.48	-1.21	-0.82	-3.6	-1.02	-0.06	-2.35	0.18	0.06	-0.86	-2.69
0.0936	-0.79	0.32	-0.13	-5.29	-0.24	0.25	-2.01	0.37	-0.91	-0.86	-2.41
0.0937	-0.45	0.32	-0.94	-6.19	-0.37	-0.9	-1.44	-0.22	-0.44	-1.36	-0.7
0.0938	-0.26	0.82	-2.57	-5.25	-0.37	-0.37	-1.26	0.5	-1.09	-0.89	-1.51
0.0939	-1.89	0.6	-0.91	-5.16	0.01	-0.24	-2.32	-0.28	-0.28	-0.43	-2.04
0.094	-0.04	-0.28	-0.6	-4.57	-0.34	0.79	-2.66	-1.19	-0.35	-1.89	-2.04
0.0941	-0.08	0.69	-0.19	-4.85	-0.99	0.57	-2.82	0.93	-0.28	0.07	-1.98
0.0942	-0.48	0.88	-0.04	-4.29	-0.49	0.41	-2.07	-0.69	-0.97	-0.24	-2.54
0.0943	-0.7	0.13	-0.82	-4.63	-0.62	0.29	-2.16	0.62	-1.59	-1.21	-2.1
0.0944	-1.57	1.6	-0.57	-5.32	-1.59	0.41	-1.54	0.03	-0.84	-1.36	-2.26
0.0945	-1.54	1.32	-0.94	-6.31	-1.18	0.72	-2.66	-0.5	-0.25	-0.86	-1.79
0.0946	-1.39	0.35	-0.54	-5.75	-0.49	0.91	-2.13	-1	-0.81	-0.96	-1.82
0.0947	-0.39	1.41	-1.04	-5.85	-0.24	0.57	-3.07	-0.28	0.06	-0.71	-1.45
0.0948	0.49	0.35	-0.82	-5.97	-0.34	0.32	-1.85	-0.41	-0.41	-0.86	-2.26
0.0949	-0.23	0.5	-1.22	-5.38	0.07	0.72	-2.07	0	-0.78	-1.39	-2.38
0.095	-0.76	-1.34	-1.54	-5.75	-0.77	-0.81	-1.48	-0.13	-0.81	-1.11	-2.04
0.0951	-0.54	-0.37	-0.82	-5.35	-0.56	0.22	-1.79	0.53	-0.31	-0.77	-2.26
0.0952	0.58	-0.43	-0.76	-5.22	0.35	0.75	-2.07	-0.66	-0.84	-1.33	-2.26
0.0953	0.74	0.13	-1.01	-5.07	-0.68	1.13	-2.75	0.25	-0.41	-0.96	-2.97
0.0954	-0.48	-0.49	-1.22	-4.94	-1.02	0.01	-1.76	0.59	-0.53	-0.61	-1.76
0.0955	-1.07	-1.21	-1.01	-5	-0.87	0.25	-1.97	-0.44	-1.5	-1.11	-2.13
0.0956	-0.64	0.88	-0.69	-4.85	-0.52	-0.28	-2.5	-0.03	-0.78	-0.46	-2.41
0.0957	-1.14	0.25	-1.16	-4.82	-1.34	0.75	-2.5	0.68	0	-0.18	-2.23
0.0958	-0.61	0.44	-1.04	-4.72	-0.52	-0.09	-1.91	0	-0.63	-0.74	-2.1
0.0959	-0.11	0.72	-0.88	-5.29	-0.56	0.07	-1.85	-0.5	-0.31	-0.68	-1.7
0.096	-0.61	-0.56	-0.69	-4.13	-1.24	-0.12	-3.47	1.5	-0.47	-0.86	-1.94
0.0961	-0.14	-0.4	-0.97	-5.13	-0.77	0.35	-2.44	0.43	-1.09	-0.39	-2.76
0.0962	-1.67	-0.12	-1.07	-6.19	-0.68	0.44	-2.69	0.12	-0.25	-0.68	-2.88
0.0963	-0.82	0.5	-0.91	-5.13	-1.15	0.85	-1.94	0.34	-0.1	-0.92	-2.16
0.0964	-0.7	0.57	-0.48	-5.13	-0.43	0.16	-2.07	0.25	-1.47	-1.17	-2.6
0.0965	-1.36	0.6	0.18	-4.85	-0.71	-0.06	-2.07	0.12	-1.06	-0.64	-2.41
0.0966	-0.39	-0.53	0.02	-5.63	-0.71	0.66	-2.72	0.31	-0.72	-0.96	-2.38
0.0967	-1.42	1.66	-1.75	-5.04	0.69	0.07	-2.44	0.28	-0.19	-0.39	-1.6
0.0968	-1.76	0.32	-0.66	-4.88	-0.4	0.32	-1.85	0.15	-1.28	-1.36	-2.13
0.0969	-1.11	-0.78	-0.04	-5	-0.59	0.72	-1.54	-0.31	-0.44	-0.92	-2.57
0.097	-0.23	1.25	-1.26	-5.44	-0.96	1.35	-1.41	0.09	-1	-0.49	-2.16
0.0971	0.08	0.79	-0.16	-5	-1.21	0.04	-3.41	-0.1	-0.66	-0.96	-0.88
0.0972	-0.01	0.6	-1.04	-4.51	-0.71	-0.28	-2.75	1.03	-0.84	-1.77	-2.29
0.0973	0.05	0.75	-0.19	-4.79	-2.15	-0.43	-2.72	-0.22	-0.44	-0.68	-2.88
0.0974	-1.42	0.22	-1.07	-4.82	-0.49	0.16	-2.75	-0.69	-0.69	-0.61	-1.7
0.0975	-1.32	0.75	-1.47	-3.97	-1.02	-0.15	-2.91	-0.28	-1.06	-0.86	-1.04
0.0976	0.08	0.25	-1.1	-5.47	-0.18	0.29	-3.44	0.5	-0.69	-0.39	-2.69
0.0977	-1.36	0.07	-0.48	-5.29	-0.4	0.41	-3.16	1.09	-0.72	-0.64	-1.91
0.0978	-1.54	0.07	-0.97	-4.72	0.26	0.07	-2.75	0.56	-0.63	-0.52	-1.88
0.0979	-1.51	-0.06	0.09	-4.94	-1.34	0.88	-2.13	0.22	-0.66	-0.92	-0.88
0.098	-0.36	-0.59	-0.69	-4.94	-0.99	-0.06	-2.72	-0.85	-0.97	-1.24	-1.85
0.0981	-0.86	0.19	-1.32	-5.1	-0.18	0.13	-2.35	-0.88	-1.28	-0.96	-1.79
0.0982	-0.76	-0.68	-0.76	-4.54	-0.68	-0.24	-2.22	0.43	-0.69	-0.99	-1.35
0.0983	-1.6	-0.81	-0.44	-4.41	-0.12	0.44	-2.19	-0.13	-0.35	-0.52	-1.07
0.0984	-1.29	2.06	-1.29	-5.07	0.47	0.32	-2.35	-0.44	-0.22	-1.21	-1.29
0.0985	-0.76	-0.28	-1.38	-4.82	-0.59	0.07	-1.63	-0.41	-0.47	-0.18	-2.63
0.0986	-0.36	2.31	-1.16	-4.85	-0.24	-0.37	-2.85	-0.28	-0.81	-1.02	-3.32
0.0987	0.58	-0.18	-1.54	-5.04	2	-0.06	-1.04	0.81	-1	-0.83	-1.7
0.0988	-0.39	0.07	-1.41	-5.32	0.26	-0.28	-1.66	0.81	-0.63	-0.52	-2.32
0.0989	-0.82	0.16	-1.41	-4.88	0.1	0.6	-2.1	1.21	-0.31	-0.68	-2.72
0.099	-0.64	0.91	-1.32	-4.66	-0.49	-0.06	-1.82	-0.53	-0.41	-0.55	-1.41
0.0991	-0.45	-0.15	-2	-5.16	-0.09	0.1	-1.79	0.84	-0.47	-0.58	-1.94
0.0992	-1.45	0.54	-0.79	-5.04	0.32	0.75	-1.82	0.25	-0.44	-0.02	-2.13
0.0993	-1.48	0.38	-1.26	-4.94	-0.84	-0.77	-1.04	0.56	-1.25	-0.68	-1.98
0.0994	-0.33	-0.31	-1.04	-5.13	0.69	0.47	-1.44	1.56	-0.75	-1.27	-1.98
0.0995	-0.73	-0.71	-0.26	-5.13	-0.65	-0.15	-2.07	0.37	-0.6	-0.71	-2.16
0.0996	-0.73	-0.4	-0.63	-5.32	-0.96	0.1	-2.94	0.03	-0.31	-1.14	-2.57
0.0997	-0.89	0.13	-0.57	-5.07	1.22	-0.24	-1.57	0.59	-0.84	-1.21	-2.26
0.0998	-1.32	1.69	-0.82	-4.47	0.75	0.13	-1.79	1	-0.22	-0.99	-2.16
0.0999	-1.89	-1.18	-0.66	-5.25	-0.46	-0.77	-3.16	0.87	0	-1.95	-1.6
0.1	-2.1	1.85	-0.72	-5.38	-1.02	-0.21	-2.26	-0.16	-0.88	-1.67	-1.51
0.1001	0.05	0.38	-0.72	-5.38	-1.4	-0.62	-2.41	0.78	-0.91	-1.11	-1.45
0.1002	-0.33	-0.12	-1.07	-5.13	0.13	-0.09	-2.26	-0.22	-1	-1.08	-1.7
0.1003	0.7	-0.03	-0.48	-5.1	-0.24	0.1	-1.79	-0.19	-0.81	-1.08	-2.19
0.1004	0.17	0.82	-1.16	-5.38	-0.62	0.5	-2.13	0	-0.47	-1.24	-2.38
0.1005	-0.89	0.57	-0.97	-5.72	0.19	0.29	-1.69	0	-0.47	-1.14	-2.07
0.1006	-0.04	0.29	-0.6	-5.38	-0.24	0.41	-2.32	0	-0.97	-0.89	-2.01
0.1007	-1.45	0.32	-0.26	-3.94	-0.84	1.03	-2.26	0.09	-0.63	-0.18	-2.26
0.1008	-1.26	0.35	0.24	-4.26	0.29	-0.46	-1.57	-0.63	-0.38	-0.08	-2.32
0.1009	-1.98	0.97	-1.75	-5.75	-0.81	-0.65	-2.41	-0.41	-0.78	-1.14	-2.26
0.101	-0.23	-0.18	-1.6	-5.22	1.04	0.72	-2.97	0.47	-0.16	-1.3	-2.85
0.1011	0.24	-0.31	-0.72	-3.66	0.57	0.13	-1.97	1.28	-0.31	-0.43	-2.66
0.1012	-0.26	0.41	0.37	-5.32	-0.93	-0.34	-2.26	0.9	-0.6	-0.27	-1.88
0.1013	-0.14	0.32	-0.91	-5.91	-1.02	-0.15	-1.69	-0.25	-1.31	-1.3	-1.26
0.1014	-1.14	-0.09	-0.51	-5.32	0.66	-0.09	-1.29	0.56	0.22	-0.74	-2.72
0.1015	-0.17	-0.62	-0.6	-4.75	-0.31	0.29	-2.16	0.31	-0.6	-1.3	-2.51
0.1016	-1.67	-0.43	-0.63	-4.38	-0.93	0.16	-2.5	0	-1.09	-1.02	-2.19
0.1017	-0.04	0.07	-1.16	-5.85	-0.24	0.75	-2.41	0.71	-0.06	-0.27	-0.85
0.1018	-0.92	-0.4	-1.29	-4.82	-0.24	0.44	-2.57	0.06	0	-0.8	-2.16
0.1019	-1.76	-0.28	-1.19	-5.13	-0.21	-0.4	-2.16	-0.16	-0.6	-2.05	-2.79
0.102	0.17	0.57	-0.63	-4.94	-0.4	0.41	-2.01	-0.1	-0.47	-0.83	-1.7
0.1021	-0.98	0.25	-1.01	-5.5	-0.21	-0.06	-1.69	0.4	0.28	-0.46	-0.6
0.1022	-1.67	0.44	-0.48	-4.97	0.07	-0.59	-1.35	0.68	-0.44	-0.83	-2.1
0.1023	-0.04	1.6	-0.63	-5.82	-0.52	1.1	-1.97	0.81	-0.38	0.01	-1.6
0.1024	-0.11	0.07	-1.82	-5.44	-1.12	0.22	-1.69	0.28	-1.03	-0.21	-1.7
0.1025	-2.14	0.85	-1.07	-4.88	-0.27	-0.4	-1.35	0.59	-1	-1.02	-1.6
0.1026	-2.07	-0.93	-2.47	-5.32	-0.34	0.29	-1.85	1	-0.69	-0.49	-1.41
0.1027	0.14	-1.34	-1.26	-5.63	-0.4	1.13	-2.22	0.34	-0.1	0.1	-1.38
0.1028	-0.92	0.94	-0.97	-5.19	-0.49	-0.24	-1.19	0.84	-0.53	-0.43	-1.26
0.1029	-0.26	0.97	-1.01	-4.47	-0.59	0.35	-1.85	-0.66	-0.35	-1.11	-1.26
0.103	-1.67	1.63	-0.19	-5.04	-1.12	-0.09	-2.04	0.93	-0.84	-2.39	-1.76
0.1031	-1.7	1.1	-0.97	-5.63	0.38	1.03	-2.63	0.5	-0.38	-1.3	-2.82
0.1032	-1.6	1.25	-1.5	-5.16	-0.93	-0.4	-1.97	0.37	-0.72	-1.14	-2.13
0.1033	-1.54	0.07	-0.97	-4.88	-0.87	0.35	-2.35	0	-0.28	-0.61	-1.51
0.1034	-0.92	0.32	-0.6	-5.29	-0.77	-0.09	-2.35	0.37	-0.22	0.35	-1.35
0.1035	-0.39	0.79	-0.57	-5.69	-0.81	0.01	-3.28	0.59	-1.13	-0.77	-1.57
0.1036	-0.79	0.32	-1.38	-4.94	-0.65	-0.68	-2.6	0.75	-0.75	-0.99	-1.85
0.1037	-0.82	0.66	-0.26	-4.88	-0.21	-0.43	-1.94	-0.16	-0.03	-1.74	-1.94
0.1038	-0.89	-0.68	-0.97	-4.94	0.69	-1.46	-1.66	-0.35	0.31	-0.77	-1.85
0.1039	-0.08	0.47	-0.82	-5.29	-0.74	-0.46	-1.19	0.18	-1.13	0.14	-2.35
0.104	-0.58	0.72	-0.94	-5.41	-0.34	0.07	-2.16	0.28	-0.78	-0.43	-1.91
0.1041	-0.7	0.01	-1.07	-4.82	-1.21	-1.27	-1.54	0.37	-0.78	-1.11	-0.92
0.1042	-1.14	2.5	0.21	-5.16	0.29	-0.9	-1.38	0.71	-0.41	-1.02	-2.19
0.1043	-0.48	-0.87	-1.1	-5.25	-1.18	0.19	-1.82	-0.91	-0.75	-0.3	-2.57
0.1044	-0.33	-0.31	-1.26	-5.63	-0.21	0.22	-2.5	0.03	-0.44	-0.05	-2.16
0.1045	-0.67	1.07	-1.94	-5.38	-1.77	-0.37	-3.04	0.4	-1.69	-0.61	-2.04
0.1046	-0.11	0.32	-1.29	-5.5	0.38	0.25	-2.04	-0.44	-0.78	-1.42	-2.1
0.1047	-0.73	0.66	-1.54	-5.63	-0.71	0.01	-1.76	0.15	0.12	-1.11	-2.23
0.1048	-0.51	0.85	-1.01	-5.57	-0.31	0.6	-1.82	0.15	-0.41	-1.39	-2.23
0.1049	-0.76	0.82	-1.13	-6.53	-0.62	0.97	-2.32	0.62	-0.25	-0.74	-1.94
0.105	1.11	-0.18	-1.22	-6.6	-0.99	0.82	-2.04	0.03	-0.75	-1.33	-1.76
0.1051	0.58	-0.53	-0.26	-6.47	-1.27	1.16	-1.88	1	-1.09	-2.36	-1.98
0.1052	-1.17	-0.24	-0.82	-5.88	-0.81	-0.09	-2.69	0.34	-0.69	-0.99	-3.04
0.1053	0.45	1.03	-1.44	-5.41	0.01	0.07	-2.16	0.43	0.12	-0.14	-2.54
0.1054	-0.58	1.22	-0.69	-4.13	-0.12	-0.28	-3	-0.16	-0.13	-0.92	-0.51
0.1055	0.33	0.13	-0.07	-5.13	-0.18	-0.03	-2.72	1.15	-0.41	-0.18	-1.63
0.1056	-0.2	0.16	-0.91	-4.44	-1.46	-0.03	-1.82	-0.85	-0.72	-0.52	-1.63
0.1057	-0.61	-0.21	-1.22	-5.04	-0.15	0.32	-1.76	1.31	-0.88	-0.68	-2.26
0.1058	0.36	1.85	-0.91	-5.69	-0.59	0.29	-1.69	0.25	-0.56	-1.39	-1.63
0.1059	-0.2	1.91	-0.38	-4.97	0.01	0.38	-2.13	0.09	0.31	-0.39	-1.57
0.106	-1.17	0.35	-0.79	-5.53	-1.12	-1.15	-2.04	1.12	-0.69	-0.74	-2.01
0.1061	0.11	0.6	-1.41	-5.1	0.19	0.47	-1.57	0.06	-1	-1.11	-2.69
0.1062	-0.92	0.63	-1.1	-5.16	0.26	-0.09	-1.54	0.59	-0.5	-0.27	-1.88
0.1063	-0.7	-0.49	-0.63	-5.32	-0.18	-0.06	-2.22	0.68	-0.41	-0.96	-1.13
0.1064	-0.64	0.6	-1.26	-5.25	-0.68	0.07	-2.72	1.28	-1.25	-1.58	-0.85
0.1065	-1.64	1.63	-1.44	-5.29	-0.43	0.16	-2.1	0.87	0.4	-0.77	-1.35
0.1066	-0.92	0.63	-0.91	-4.57	-1.49	0.63	-2.44	0.84	-0.97	-1.3	-2.26
0.1067	0.08	0.69	-1.57	-5.16	0.26	-0.12	-1.88	-0.69	-0.38	-0.8	-1.48
0.1068	-0.45	0.16	-1.13	-5.16	-0.71	-0.37	-3.47	0.09	-0.41	-0.46	-2.41
0.1069	-0.67	1.25	-0.66	-5.38	0.04	-0.65	-2.35	0	0.4	-1.39	-1.73
0.107	-0.67	1.16	-1.26	-5.04	0.91	0.07	-2.22	0.71	0.03	-1.95	-1.41
0.1071	-2.04	0.91	-1.22	-4.85	-1.68	-0.68	-1.85	0.03	-0.81	-0.27	-1.63
0.1072	-0.26	-0.12	-0.85	-5.41	-0.93	0.16	-2.69	0.28	0.18	-0.58	-1.54
0.1073	-0.04	0.22	-0.63	-5.22	-0.59	-0.28	-2.41	1.4	-1.81	-1.21	-2.07
0.1074	-0.26	0.44	-0.97	-4.82	-0.52	0.38	-3.41	0.53	-0.72	-0.92	-2.41
0.1075	-0.2	0.88	-0.94	-5.04	-1.02	0.72	-3.25	0.78	-0.25	-0.61	-2.44
0.1076	-1.01	1.63	-1.07	-5.85	-0.74	0.38	-2.5	0.22	-1.16	-0.77	-1.85
0.1077	0.45	2.25	-1.07	-5.47	-1.09	-0.09	-3.19	0.28	-1.41	0.57	-1.91
0.1078	-1.04	0.38	-0.97	-5.13	-0.15	-0.09	-2.32	0.03	0.06	-0.68	-2.01
0.1079	-1.51	1.25	-1.19	-4.22	-0.93	-0.21	-2.54	0.31	-0.38	-1.17	-3.16
0.108	-0.95	0.5	-2.04	-5.1	-0.65	-0.37	-1.85	-0.25	-0.91	-0.39	-2.44
0.1081	-1.07	-0.49	-1.41	-5.13	-0.65	0.01	-2.29	0.18	0.18	-0.08	-1.98
0.1082	-0.98	1.69	-0.88	-4.6	-0.62	-1.12	-2.29	1	-0.38	-1.08	-2.69
0.1083	-0.14	0.41	-0.04	-5.1	0.01	0.44	-2.22	0.68	-0.38	-0.02	-2.69
0.1084	0.8	0.63	-1.16	-6.16	-1.93	-0.4	-1.35	-1.22	-0.66	-0.39	-1.79
0.1085	-2.1	1.78	-0.13	-5.1	-1.9	-0.18	-1.16	1	-0.25	-1.58	-1.6
0.1086	-0.92	0.32	-1.26	-5.19	-0.06	0.01	-1.57	1.28	-0.16	-0.61	-2.23
0.1087	-1.79	0.63	-1.47	-4.41	-0.65	0.44	-1.69	0.34	-0.97	-1.02	-2.07
0.1088	-0.36	0.47	-2.04	-5.25	-1.37	0.41	-1.88	0.84	-0.44	-0.52	-1.88
0.1089	-0.92	0.91	-1.94	-5.13	0.1	0.47	-2.26	0.53	-0.97	-0.39	-1.63
0.109	-0.58	0.63	-1.44	-4.97	-0.43	-0.43	-2.04	-0.41	-0.13	-1.52	-1.41
0.1091	-0.23	0.5	-1.5	-4.88	-0.4	-0.37	-2.35	0.75	0.34	-0.55	-1.63
0.1092	-0.79	0.72	-1.57	-5.13	-0.65	0.66	-2.13	0.68	-0.6	-0.83	-1.41
0.1093	-0.23	-0.06	-0.16	-6.19	-0.34	-0.28	-2.69	0.03	-0.78	0.85	-1.7
0.1094	-0.82	-1.02	-0.13	-5.35	-0.15	0.41	-1.51	0.12	-0.44	0.23	-1.76
0.1095	-0.82	0.79	-1.01	-5	-0.4	-0.43	-1.63	0.25	-0.41	-0.55	-1.57
0.1096	-1.14	0.82	-1.66	-5.1	-1.65	0.72	-2.35	0.09	-1.16	-0.74	-3.1
0.1097	-1.57	0.97	-0.26	-6.13	-0.03	1.13	-1.41	0.03	0	-0.64	-2.51
0.1098	-1.23	2	-0.57	-5.16	-0.49	-0.09	-1.07	0.06	-0.5	-0.8	-1.48
0.1099	-1.04	0.75	-0.41	-4.72	-0.59	-0.09	-1.54	0.78	-0.66	-0.27	-1.66
0.11	-0.2	1.25	-0.72	-5.19	-1.27	0.07	-0.73	0.31	-0.6	-0.92	-1.7
0.1101	-2.26	0.97	-0.44	-6.16	-0.27	-0.03	-1.72	-0.22	-0.5	-1.92	-2.19
0.1102	-0.04	-0.34	-0.07	-5.04	0.19	-0.81	-1.26	0.31	-0.35	-0.71	-1.82
0.1103	-0.89	0.57	-0.69	-4.91	0.01	-0.87	-1.57	0.65	-0.78	-0.89	-2.26
0.1104	-0.89	0.91	-0.72	-5.22	-0.24	0.44	-2.04	0.65	0.37	-0.8	-2.07
0.1105	0.2	0.85	-0.66	-5.6	-0.24	-0.21	-2.38	0.9	-1.09	-0.58	-2.38
0.1106	-0.26	1.22	-0.91	-5.41	-0.46	-0.12	-2.07	0.59	-0.6	-0.99	-1.45
0.1107	-0.79	0.88	-0.82	-5	-1.52	0.01	-2.07	-0.22	-0.1	-0.68	-2.04
0.1108	-0.89	1.81	-0.76	-5.22	-0.52	-0.49	-2.72	1.21	-1.16	-0.52	-1.88
0.1109	-0.92	0.79	-1.01	-5.85	-0.81	0.72	-3	1.09	-1	0.23	-1.7
0.111	-0.79	0.35	-0.23	-5.29	-1.05	0.19	-2.13	0.06	-0.72	0.04	-1.7
0.1111	0.02	0.29	-1.1	-6.41	-1.15	-0.06	-1.82	0.37	0.65	-0.64	-1.85
0.1112	-1.14	0.25	-0.32	-5	-0.52	-0.15	-2.01	1.21	-0.5	-0.02	-2.19
0.1113	-1.17	0.57	-0.13	-5.25	-0.87	-0.24	-2.04	0.9	-0.1	-0.36	-0.85
0.1114	-0.48	1.85	-0.79	-5.35	0.72	-0.12	-2.72	0.31	-0.63	0.23	-1.26
0.1115	-1.14	0.94	-0.82	-6.41	-1.12	0.07	-1.51	0.93	-1.16	-0.86	-1.6
0.1116	0.33	0.79	-1.69	-5.38	-0.52	-0.81	-1.35	1.28	0.09	-0.39	-1.7
0.1117	-0.17	0.66	-1.63	-4.04	-0.31	0.07	-2.19	0.06	-0.13	-0.89	-2.38
0.1118	-1.11	-0.37	-0.6	-5.32	-0.06	-0.28	-1.07	1.03	0.34	0.2	-2.66
0.1119	-0.82	1.1	-0.91	-5.35	-0.71	0.22	-1.23	1.74	-0.72	-0.08	-1.66
0.112	-2.07	-0.12	-0.79	-6.53	-1.09	0.04	-2.22	0.4	-0.6	-1.05	-1.32
0.1121	-0.36	1.19	-1.16	-4.47	-2.05	-1.09	-1.97	0.68	-1	0.2	-1.57
0.1122	-0.23	0.72	-1.01	-5.88	0.16	0.5	-1.76	1	-0.5	-0.71	-2.01
0.1123	-1.11	0.94	-1.04	-5.6	-0.81	0.25	-2.47	0.03	-0.03	-0.86	-2.07
0.1124	-0.45	-0.24	-0.19	-5.16	-1.43	-0.31	-1.88	1.37	-1.5	-0.64	-1.66
0.1125	-0.7	1.63	-1.07	-5.63	-0.15	0.66	-1.51	0.81	-0.78	-0.52	-0.76
0.1126	-1.23	1.41	-1.04	-5.47	-0.49	1.63	-2.07	1.46	-0.22	-0.52	-2.41
0.1127	-0.64	1.38	-0.88	-4.63	-1.74	0.22	-2.35	1.28	0.59	-0.3	-2.48
0.1128	-0.36	-0.18	-0.79	-5.32	-0.71	-0.09	-2.72	0.03	-0.66	0.64	-2.07
0.1129	-0.29	0.79	-1.07	-5.19	-0.59	-1.02	-1.44	1.43	-0.38	-1.49	-1.63
0.113	-0.7	1.75	-1.04	-5.16	0.69	-0.28	-2.26	0.65	-1.28	-0.05	-2.04
0.1131	-0.48	1.85	-0.94	-5.66	-1.68	0.01	-0.94	0.65	-1.47	-0.08	-1.6
0.1132	-0.89	-1.18	-0.82	-5.41	-0.4	0.72	-3.16	1	0.31	-0.92	-1.57
0.1133	-1.23	0.91	-1.01	-4.88	-0.27	0.07	-2.54	0.75	0	-0.68	-2.57
0.1134	-1.92	0.69	-1.16	-5.44	0.47	0.32	-2.16	0.84	-0.03	-0.68	-1.88
0.1135	-2.54	-0.21	-0.48	-5.35	-0.81	0.57	-1.54	0	-1.59	0.2	-1.82
0.1136	-2.07	0.66	-1.04	-4.94	-0.99	0.04	-2.07	0.34	-0.69	-0.92	-2.1
0.1137	-0.61	0.07	-0.48	-5.66	-0.96	0.07	-2.91	1.12	-0.38	-0.43	-2.23
0.1138	0.77	0.94	-1.13	-4.19	-0.31	-0.84	-1.57	0.62	-0.41	-0.96	-0.67
0.1139	-0.04	0.94	-0.94	-5.47	-0.12	-1.21	-1.57	0.56	-0.41	-0.99	-2.57
0.114	-0.01	-0.53	-1.19	-5.66	-0.59	-0.46	-0.98	0.5	-1.25	-0.55	-2.23
0.1141	-0.54	1.66	-1.35	-5.13	-1.09	-1.4	-1.72	1.28	-0.97	-0.61	-2.41
0.1142	-2.2	1.94	-1.19	-5.53	-0.24	-1.09	-0.91	0.87	-0.63	-0.24	-1.1
0.1143	0.08	0.41	-0.32	-5	-0.15	-0.62	-1.85	0.53	-1.13	-1.02	-1.66
0.1144	-1.82	1.57	-1.44	-5.91	-0.74	-0.06	-2.19	1.03	-1.28	-0.33	-2.07
0.1145	-1.04	1.32	-0.94	-5.72	-0.09	0.63	-2.79	0.75	-0.81	-1.17	-1.38
0.1146	-1.39	0.1	-1.6	-5.1	-1.18	0.07	-2.13	0.56	-1.09	-1.11	-2.01
0.1147	-1.2	0.35	-1.41	-6.19	-0.43	-0.15	-2.22	0.56	-1.59	-0.61	-1.94
0.1148	0.36	1.94	-1.04	-6.91	-0.93	1	-2.91	0.62	0.12	-0.61	-2.07
0.1149	-0.45	1.28	0.24	-5.97	-0.43	-0.59	-1.94	0.87	-0.63	-0.99	-2.54
0.115	-0.95	-0.28	-1.07	-4.91	-0.71	0.01	-2.19	1.84	0	-0.68	-2.16
0.1151	-1.01	-0.68	-2.85	-5.63	-0.34	-0.18	-0.69	0.65	-0.22	-1.05	-1.6
0.1152	-1.76	1.32	-1.1	-5.75	-0.65	0.19	-1.63	0.9	0.03	-1.11	-1.66
0.1153	-1.07	-0.34	-1.63	-5.78	-0.4	0.22	-1.63	0.56	-0.06	-0.08	-1.82
0.1154	0.3	0.32	-1.38	-5.66	-0.21	0.01	-2.19	0.28	-0.35	-0.43	-2.97
0.1155	-0.48	-0.09	-0.57	-5.85	-1.65	-1.06	-1.38	1.21	-1.34	-0.68	-1.98
0.1156	-0.7	0.91	-0.51	-4.85	-1.68	0.07	-2.29	0.96	-0.78	-0.61	-2.07
0.1157	0.08	-0.43	-1.26	-5.44	-1.05	0.32	-2.22	-0.44	-0.91	-1.05	-1.98
0.1158	-1.73	0.47	-1.07	-4.35	-0.87	0.32	-2.04	0.75	0	0.07	-2.13
0.1159	-0.45	0.97	-0.6	-5.44	-1.15	0.07	-2.47	0.84	-0.78	-0.27	-2.1
0.116	-0.82	1.07	-0.69	-5	-0.96	-0.28	-2.79	0.59	-0.63	-0.99	-1.51
0.1161	0.64	1.25	-0.79	-5.32	-0.77	0.57	-2.22	1.28	-0.6	-2.2	-0.26
0.1162	-0.79	0.97	-1.04	-5.41	-1.21	-0.06	-1.97	1.5	-0.78	-0.96	-1.73
0.1163	-0.92	-0.18	-0.6	-4.91	-0.56	0.5	-1.57	0.84	-1.09	-0.68	-1.63
0.1164	-0.61	0.82	-1.13	-5.04	-0.27	0.38	-1.79	1.25	-0.35	-1.14	-2.19
0.1165	-0.45	0.5	-1.32	-5.41	-0.4	0.88	-1.32	1.56	-0.28	-0.52	-1.73
0.1166	-0.33	0.85	-1.19	-5.44	0.07	0.25	-2.91	1.28	-1.28	-1.36	-1.35
0.1167	-1.17	0.41	-0.91	-5.22	-0.87	-0.4	-2.16	1.81	0	-1.08	-1.82
0.1168	-1.2	0.47	-1.01	-4.91	-0.31	-0.09	-1.66	1.12	-0.28	-0.24	-2.57
0.1169	-0.39	-0.59	-1.16	-5.19	-0.96	0.22	-2.16	1.37	-0.13	0.39	-1.48
0.117	-1.04	2.16	-1.01	-5.72	-0.68	0.19	-1.91	1.12	-0.47	-0.89	-1.85
0.1171	-0.08	0.47	-0.69	-5.29	-0.87	-0.71	-1.76	1.4	-0.16	-0.99	-1.73
0.1172	-0.64	1.07	-0.69	-4.82	-1.24	-0.18	-2.63	0.9	-1.16	-1.67	-2.88
0.1173	-0.54	-0.24	-1.22	-5.69	-0.52	-1.02	-2.54	0.87	-0.84	-1.05	-2.07
0.1174	-1.11	0.63	-0.88	-5.25	-0.52	0.44	-2.97	2.03	1	-0.55	-1.07
0.1175	-0.39	0.79	-0.79	-5	-0.77	-0.4	-3.6	0.4	-0.72	-0.68	-1.82
0.1176	0.52	1.5	-1.13	-5.85	-0.68	0.5	-3.53	0.9	-0.6	-0.92	-2.26
0.1177	-0.33	0.75	-1.04	-5.22	-0.21	0.57	-2.57	0.71	-0.06	-1.77	-1.7
0.1178	-0.54	-0.03	-0.69	-5.63	-0.37	0.41	-2.97	0.65	-0.56	-1.39	-2.1
0.1179	-0.64	0.5	-0.23	-4.75	-1.37	0.35	-2.41	1.12	-0.63	-1.17	-1.66
0.118	-1.07	-0.9	-0.1	-5.35	0.88	-0.28	-2.07	1.99	-0.03	-0.86	-1.94
0.1181	-0.89	0.94	-1.19	-4.54	-0.31	-0.9	-2.04	1.65	-1	-0.33	-1.94
0.1182	0.39	0.01	-2.28	-5.41	-0.71	0.22	-2.44	1.12	-0.63	-1.52	-1.16
0.1183	-0.98	1.25	-0.82	-4.97	-1.18	0.22	-1.97	2.37	-0.03	-0.71	-0.54
0.1184	-0.92	0.82	-1.16	-5.22	-0.34	-0.68	-2.47	1.56	-0.72	-0.39	-1.41
0.1185	-1.29	-0.56	-1.01	-5.44	-1.18	0.35	-1.69	1	-1.22	-0.39	-1.29
0.1186	-1.29	1.88	-1.66	-4.88	-0.68	-0.53	-1.88	1.62	-0.44	-0.64	-1.41
0.1187	-0.23	1.5	-2.41	-5.63	-0.21	1.03	-1.79	0.9	-1.19	0.04	-1.35
0.1188	-1.26	-0.68	-1.04	-4.51	0.22	-0.28	-2.16	0.65	-0.97	-1.21	-2.41
0.1189	-1.14	0.69	-1.91	-5.47	-0.77	-0.09	-1.54	1.28	-0.41	-1.52	-1.88
0.119	-1.04	0.07	-1.82	-5.63	0.19	0.44	-2.57	0.71	0.15	-0.64	-2.19
0.1191	-1.04	0.94	-1.29	-5.66	-0.9	0.22	-2.41	2.12	-0.47	-0.86	-1.7
0.1192	0.17	1.57	0.34	-5.41	-1.24	0.32	-2.19	1.18	-1.16	-1.36	-1.01
0.1193	-1.85	0.97	-1.13	-5.22	-0.62	-0.18	-1.41	1	-0.78	-0.46	-1.66
0.1194	-0.82	0.38	-1.04	-5.53	-1.59	-0.4	-1.85	1.09	-0.41	-1.02	-1.41
0.1195	-0.92	-0.93	-0.69	-5.44	-0.4	0.25	-0.91	0.68	-0.35	-0.96	-1.35
0.1196	-0.73	0.1	-0.54	-5.78	-0.96	-0.28	-2.19	1.25	-0.63	-1.36	-1.13
0.1197	-0.42	0.94	-0.63	-5.53	-0.96	-1.21	-0.85	0.81	-0.41	-0.77	-2.04
0.1198	-0.26	0.6	-0.23	-5.53	-0.71	0.01	-1.69	1.43	-0.41	-1.39	-1.51
0.1199	-1.17	2.38	-0.91	-5.13	-1.09	0.01	-1.91	1.81	-0.63	-1.02	-1.54
0.12	-1.23	2.06	-1.38	-5.35	-0.71	-0.18	-1.51	0.34	-0.16	-0.49	-1.26
0.1201	-0.86	0.41	-0.69	-5.13	-0.46	-0.59	-1.44	1.4	-0.5	-1.39	-1.66
0.1202	-0.79	-0.06	-0.07	-5.72	-0.09	-0.06	-2.19	0.9	-0.78	-1.21	-1.29
0.1203	-0.45	2.47	-0.69	-5.16	-0.49	0.82	-1.29	1.99	-0.53	-1.58	-1.51
0.1204	-1.48	-0.15	-1.13	-5.13	-0.27	0.41	-2.54	0.31	-0.72	-0.74	-2.13
0.1205	-1.2	1.38	-1.04	-5.07	-0.87	-0.24	-2.75	0.31	-0.88	-1.39	-1.54
0.1206	-1.01	0.88	-0.48	-5.13	1.25	-0.4	-2.5	1.21	-0.31	-0.99	-1.23
0.1207	-1.7	-1.18	-0.82	-5.22	0.32	0.47	-1.41	1.56	-1.13	-0.14	-1.1
0.1208	-1.32	-0.49	-0.76	-5.32	-0.09	-0.56	-1.91	0.22	-0.78	-1.08	-1.91
0.1209	-1.04	0.91	-1.01	-5	-0.09	-0.21	-2.22	1.93	-0.03	-0.86	-1.76
0.121	0.17	0.32	-0.88	-5.25	0.19	-1.15	-2.41	1.5	-1.09	-0.83	-0.98
0.1211	-0.64	-0.03	-0.63	-4.85	-0.52	0.85	-2.63	1.68	-1.09	-0.99	-1.76
0.1212	-1.2	-0.49	-0.6	-5.16	0.47	0.07	-1.66	1.18	-1	-1.71	-1.63
0.1213	-0.11	-0.18	-1.01	-5.16	0.26	0.5	-2.91	1.31	-0.5	-0.55	-1.79
0.1214	-1.07	1.32	-0.51	-5.04	0.16	-1.24	-1.88	0.81	-1.03	-0.49	-0.92
0.1215	-0.82	0.35	-0.32	-5.13	-1.43	0.29	-2.01	1.84	-0.72	0.07	-1.07
0.1216	-1.39	0.79	-0.51	-5.16	-0.27	0.72	-1.88	1.68	-0.75	-0.21	-0.88
0.1217	-1.29	0.16	-0.66	-5.22	0.07	0.25	-1.72	2.03	0.53	-0.83	-0.98
0.1218	-0.45	0.07	-0.44	-5	-0.74	0.04	-1.76	2.03	0.22	-0.43	-1.23
0.1219	0.3	-0.06	-0.82	-4.97	-0.68	-0.18	-2.19	1.31	-0.28	-0.18	-1.94
0.122	-0.45	1.41	-0.07	-4.91	-1.4	-0.49	-1.72	1.59	-1	-0.11	-1.32
0.1221	-0.7	1.22	-1.07	-4.01	-0.46	-0.4	-1.82	1.59	-0.44	-0.89	-0.54
0.1222	-1.32	0.41	-0.76	-4.69	-0.96	0.04	-2.32	1.4	-0.16	0.23	-2.88
0.1223	-1.51	0.6	0.62	-5.1	0.26	-0.87	-1.54	1.28	-0.5	-0.8	-2.16
0.1224	-1.04	0.66	-0.94	-7.38	-1.65	0.6	-1.91	1.68	-0.84	-0.61	-1.45
0.1225	-1.11	0.35	-1.07	-5.07	0.04	-0.12	-1.94	0.15	0.37	-1.14	-1.07
0.1226	-0.79	0.41	-0.66	-4.82	-0.9	0.47	-2.94	1.21	-1.41	-0.71	-1.85
0.1227	-1.32	1.63	-0.16	-5.29	-1.05	0.13	-2.16	1.31	-1.09	-1.08	-1.23
0.1228	-0.39	0.69	-1.04	-5.78	-2.12	0.1	-2.85	1.09	-0.31	-0.71	-1.91
0.1229	-0.39	-0.68	-1.1	-4.79	-0.18	0.85	-0.66	1.78	-0.78	-0.49	-1.29
0.123	-0.01	0.66	-1.04	-4.72	-0.99	0.6	-1.94	1.99	-0.53	-1.92	-1.48
0.1231	-1.36	0.94	-0.04	-5.07	-1.59	0.07	-1.97	1.78	-0.38	-0.46	-1.01
0.1232	-2.51	-0.28	-0.79	-5.1	0.07	-0.12	-2.35	1.99	-1.16	-0.27	-2.16
0.1233	-0.64	0.38	-1.41	-5.25	-0.43	0.38	-1.13	0.56	-0.25	-1.33	-1.26
0.1234	-0.86	0.38	-0.76	-4.35	-1.15	-0.74	-2.13	1.78	-0.35	-0.86	-1.48
0.1235	-0.95	0.01	-0.69	-5.13	-1.62	0.22	-1.57	1.78	-0.47	0.1	-1.35
0.1236	-1.51	-0.15	-0.97	-5.88	0.01	-1.59	-2.57	1.25	-0.56	-0.27	-2.04
0.1237	-2.14	0.75	-0.01	-5.1	-1.15	-0.18	-2.16	2.03	-1.41	-0.77	-1.63
0.1238	-2.04	1.47	-0.69	-5.35	-1.24	-0.77	-1.97	1.56	-0.75	-0.3	-0.85
0.1239	-1.32	0.94	-1.69	-5.04	0.04	-0.34	-2.75	1.5	-0.66	-1.52	-1.07
0.124	-1.04	0.66	-1.04	-4.13	-0.18	-1.18	-2.29	1.62	-0.94	-1.21	-1.48
0.1241	-1.2	-1.21	-0.57	-5.44	-0.77	-0.28	-2.66	0.81	-0.22	-0.14	-1.57
0.1242	-1.48	1.19	-0.69	-4.69	0.54	0.32	-1.51	-0.16	-1	-0.92	-1.01
0.1243	-2.29	0.01	-0.94	-5	0.26	-0.12	-1.54	1.15	-0.6	-1.14	-1.41
0.1244	0.05	0.44	-1.07	-4.38	-0.31	-0.37	-2.44	1.25	-0.5	-0.74	-1.7
0.1245	-0.82	0.63	-0.38	-5.41	-0.03	0.6	-3.47	1.99	-1	0.57	-2.07
0.1246	-0.45	-0.12	-0.66	-5.82	-0.03	0.72	-1.01	1.87	-1.16	-0.43	-1.7
0.1247	-0.45	1.07	-1.16	-5.78	-0.4	0.47	-1.85	1.25	-0.6	0.01	-1.13
0.1248	-1.29	0.13	-0.51	-5	-0.09	-0.37	-1.79	0.59	-1	-0.68	-0.2
0.1249	-1.85	0.22	-1.04	-5.94	0.47	1.47	-2.44	1.37	-0.41	-1.33	-0.26
0.125	-0.73	-0.65	-0.01	-6.44	-0.87	0.35	-1.94	0.71	-0.44	0.45	-1.23
0.1251	-1.11	-1.15	-1.04	-5.44	-0.24	-0.06	-1.82	1.59	-0.94	-0.11	-1.98
0.1252	-0.17	-0.18	-0.72	-4.38	-0.4	0.13	-1.38	0.71	-1.91	0.07	-1.57
0.1253	-0.82	0.13	-0.94	-5.41	0.69	-0.09	-2.41	2.28	-0.94	-0.99	-0.95
0.1254	-1.7	-0.53	-0.6	-5.85	-1.43	-0.65	-1.97	1.09	-1.06	-1.3	-1.16
0.1255	-1.42	1.25	-0.26	-4.85	-0.65	-0.34	-1.51	1.03	-0.69	-0.8	-1.63
0.1256	-0.2	0.82	-0.48	-5	-0.49	-1.02	-1.57	0.22	-1.09	-1.17	-1.41
0.1257	-0.79	-0.15	-0.63	-4.69	-0.09	-0.06	-2.32	0.31	-0.31	-0.39	-0.67
0.1258	-1.7	2.97	-1.26	-5.29	-1.87	-0.09	-1.41	1.12	-1.84	-1.24	-1.57
0.1259	-1.23	0.19	-0.69	-5.72	-0.52	1.47	-2.35	0.4	-0.72	-1.05	-1.35
0.126	-2.04	0.29	-0.94	-4.75	-2.15	0.41	-1.79	0.4	-0.6	-0.43	-1.91
0.1261	-1.2	1.6	-0.38	-5.13	-1.09	0.29	-1.97	1.5	-1.22	-0.46	-0.82
0.1262	-0.42	-0.12	-0.41	-4.69	-0.87	0.16	-1.82	1.93	-0.6	-1.21	-2.13
0.1263	-0.95	-0.93	-0.01	-4.82	-1.34	0.6	-1.44	1.31	-1.97	-0.14	-1.85
0.1264	-0.51	0.25	-2	-4.54	-0.74	-0.18	-2.35	0.68	-1	-0.3	-0.98
0.1265	-2.6	0.85	-0.48	-4.94	-0.4	-0.65	-3.25	0.03	-0.44	-1.24	-1.6
0.1266	-0.54	1.07	1.05	-5.1	-0.96	0.07	-2.16	0.84	-0.03	-0.27	-1.51
0.1267	-0.33	1.28	-0.72	-4.97	-1.21	-0.53	-2.32	1.99	-0.31	-0.52	-0.54
0.1268	-1.11	-0.18	-1.1	-4.72	-0.21	0.07	-2.44	0.59	-1.63	-0.71	-3.01
0.1269	-0.73	0.13	-0.82	-4.47	0.04	0.44	-1.82	1.03	-1.13	-0.86	-2.1
0.127	0.45	0.07	0.24	-5.35	-1.27	0.01	-1.97	1.09	-0.91	-0.36	-0.95
0.1271	-0.95	0.19	-0.51	-3.51	-1.68	0.07	-2.16	1.5	-0.78	-0.11	-0.1
0.1272	-1.04	0.94	-1.54	-4.85	-1.02	0.35	-2.01	1.06	-1.16	-0.3	-0.51
0.1273	-1.51	-0.68	-0.57	-4.35	-0.62	-0.24	-3.13	1.15	-0.69	0.54	-1.57
0.1274	-1.39	-0.28	0.18	-5.19	-0.27	-0.96	-2.35	1.71	-1.41	-1.33	-0.88
0.1275	-0.98	1.63	-0.63	-5.72	-1.37	-1.18	-3.47	1	-0.81	-0.83	-1.26
0.1276	-1.73	0.57	-1.19	-5.53	0.29	0.44	-2.6	-0.25	-0.56	-0.89	-2.07
0.1277	-0.76	1.63	-0.6	-4.69	0.16	0.29	-2.72	1.81	-1.81	-1.3	-1.51
0.1278	-0.79	-0.31	-0.13	-5.25	-0.24	-0.46	-2.04	0.03	-1.03	-0.52	-2.04
0.1279	-0.73	0.63	-0.72	-5.38	0.01	-0.15	-3.22	0.75	-0.75	-0.52	-1.13
0.128	-1.04	0.29	0.4	-4.66	1.13	0.16	-1.23	1.4	-0.22	-0.49	-0.73
0.1281	-1.17	1.35	-1.07	-5.88	-0.65	0.66	-3.5	0.59	-0.16	-0.77	-0.92
0.1282	-2.04	1.91	-1.35	-5.16	-0.74	0.41	-1.35	1.25	-0.66	0.04	-1.04
0.1283	0.05	2	-0.97	-5.35	-0.52	-0.4	-1.69	1.12	-1.28	-0.74	-1.73
0.1284	-1.73	0.25	-0.23	-4.79	-0.34	0.04	-0.88	0.56	-2.65	-0.24	-1.26
0.1285	-0.67	0.07	-0.82	-4.97	-0.84	0.13	-1.51	1.28	-0.97	-0.8	-1.6
0.1286	-0.92	2.41	-0.94	-5.32	-1.12	0.32	-1.07	0.71	-0.88	-0.86	-1.35
0.1287	-1.29	-0.28	-1.22	-4.51	0.07	0.07	-1.19	0.25	-0.63	-1.11	-2.41
0.1288	-1.2	0.44	-1.66	-5.25	0.16	0.22	-1.72	0.53	-1	-0.43	-1.82
0.1289	-1.23	1.72	-1.72	-5.47	0.51	-0.53	-1.54	1.25	-0.81	0.23	-1.26
0.129	-0.67	0.94	-1.44	-5.78	0.13	0.35	-1.94	0.31	-0.81	-1.17	-1.07
0.1291	-0.76	0.82	-0.01	-4.54	-0.49	-1.12	-2.04	1.03	-1.16	-1.52	-2.91
0.1292	-2.2	0.72	-0.63	-4.69	-0.27	0.19	-0.79	0.9	-0.31	-0.46	-2.1
0.1293	-0.45	2.25	0.4	-5.1	-0.68	0.41	-2.13	2.34	-1.13	-1.11	-2.01
0.1294	-1.04	-0.31	-1.01	-5.29	-1.18	-0.03	-1.54	0.34	-0.44	-0.77	-1.1
0.1295	-0.48	0.94	-0.66	-6.78	-1.65	-0.4	-1.54	0.62	-1	-0.33	-1.57
0.1296	-0.92	-0.06	0.37	-4.94	-0.15	-0.03	-1.48	0.75	-0.97	-0.89	-2.26
0.1297	-1.7	1.1	-0.38	-5.5	-1.12	0.32	-1.41	0.68	-1.25	-0.71	-2.04
0.1298	-1.14	1.07	-0.29	-5.1	-0.96	0.79	-1.44	1.21	-0.47	-1.27	-0.88
0.1299	-0.45	-0.09	-0.32	-4.91	-0.52	0.54	-1.32	1.78	-0.41	-0.89	-1.26
0.13	-0.82	2.28	-0.41	-4.29	-1.24	-0.18	-1.1	1.31	-1.59	-0.83	-1.85
0.1301	-0.17	1.32	-0.63	-5	0.26	0.69	-1.04	1.62	-1.16	-0.36	-1.85
0.1302	-0.89	1.13	-0.32	-5.22	-0.9	1.35	-1.54	1.34	-0.63	-1.36	-2.44
0.1303	-1.6	0.82	-0.69	-5.47	-2.27	0.79	-1.16	0.22	-0.81	-1.67	-1.01
0.1304	-0.29	0.75	-0.32	-5.19	-0.96	0.25	-2.01	0.22	-0.97	-0.89	-0.67
0.1305	-0.76	1.5	-0.23	-5.07	-1.37	0.35	-1.35	0.4	-1.84	0.14	-1.82
0.1306	-1.11	-0.18	-0.79	-5.41	0.04	0.01	-1.44	0.78	-1.97	-0.68	-1.32
0.1307	-0.92	0.75	-0.94	-5.1	0.1	-0.77	-1.76	1.31	-1.16	-0.61	-1.13
0.1308	-1.39	0.57	-0.41	-4.79	0.04	-0.84	-1.88	1.18	-0.35	-0.55	-1.04
0.1309	-1.39	-0.87	1.05	-5.07	-0.43	0.07	-2.16	0.84	-1	-1.17	-0.76
0.131	-0.95	0.38	-0.6	-4.75	0.26	-0.12	-0.48	1.59	-1	-0.52	-0.85
0.1311	-0.51	0.69	-0.04	-5.44	-0.65	-0.06	-1.29	1	-0.91	-0.05	-1.26
0.1312	-1.14	-1.12	-0.07	-6.31	-0.68	-0.71	-1.38	1.18	-0.75	-0.3	-0.7
0.1313	-1.82	2.78	0.21	-5	-1.15	0.38	-1.26	1.87	-0.91	-1.24	-1.35
0.1314	-2.04	1.5	-0.51	-4.1	-0.68	1.38	-0.63	1.09	-0.06	-1.17	-1.04
0.1315	-0.67	-0.18	-0.82	-4.91	-0.65	0.07	-1.66	2.15	-0.81	-0.89	-1.07
0.1316	-0.92	1.85	0.02	-5	-0.43	0.35	-1.23	1.53	-0.78	-0.52	-2.44
0.1317	0.39	-0.93	-0.32	-5.35	0.57	-0.56	-1.91	1.21	-1	-0.14	-1.94
0.1318	-0.29	0.41	-0.44	-4.82	-0.4	0.01	-1.79	1	-0.78	-0.86	-1.48
0.1319	-0.7	0.66	-1.01	-4.97	-0.84	0.22	-1.44	1.43	-1.56	-0.64	-1.66
0.132	-1.23	1.66	-0.54	-5.66	-1.05	-1.18	-1.79	0.81	-0.1	-0.27	-1.23
0.1321	-0.95	1.75	0.06	-4.79	-0.21	0.29	-1.29	1.25	-0.72	0.2	-2.69
0.1322	-1.82	1.63	-0.57	-4.22	-0.59	0.04	-1.51	1.59	-1.38	-1.02	-1.79
0.1323	-0.86	1.5	-0.23	-5.04	0.1	-0.18	-0.38	1.09	-0.16	-0.46	-1.63
0.1324	-1.32	0.25	-0.97	-5.35	0.22	0.41	-1.44	1.28	-0.6	-0.92	-1.04
0.1325	-1.29	0.29	-1.07	-5.1	-1.15	-0.12	-1.26	1.93	-0.78	-0.55	-0.57
0.1326	-0.98	0.07	-0.94	-5.5	-1.24	0.35	-1.94	1	-2	-0.21	-1.01
0.1327	-1.11	0.13	0.18	-5.16	-1.77	0.35	-0.41	0.71	-1.19	-0.86	-1.23
0.1328	-1.76	1.91	-0.57	-3.19	-2.24	-0.49	-1.97	2.68	-1.38	-0.64	-0.76
0.1329	-0.64	-0.87	-0.69	-5.29	-0.43	-0.65	-0.88	2.06	-0.72	-0.49	-1.66
0.133	-1.98	0.63	-0.44	-6.44	-1.99	-0.74	-2.38	2.52	-0.63	-1.11	-1.26
0.1331	-2.01	0.82	-0.69	-5.1	-0.24	-0.4	-1.35	1.4	-1.47	-1.21	-1.35
0.1332	-1.54	1.38	-0.51	-4.47	-0.99	0.1	-1.41	0.81	-1.09	0.01	-1.38
0.1333	-1.64	0.44	-0.79	-4.47	-2.21	-0.56	-0.76	1.56	-1.31	-0.33	-1.51
0.1334	-1.32	1.91	0.18	-4.88	-1.49	0.22	-1.76	2.09	-0.94	-0.52	-0.6
0.1335	-1.64	1	-0.48	-4.72	-1.46	-0.4	-1.72	1.06	-1.06	-0.52	-1.57
0.1336	-1.39	1.57	-0.38	-4.47	-0.93	-0.21	-0.2	0.43	-0.63	-0.89	-1.1
0.1337	0.64	-0.12	-0.76	-4.97	-0.99	-0.46	-1.23	2.65	-0.94	-1.21	-1.45
0.1338	-1.92	1.81	-0.54	-5.47	-1.99	-0.28	-1.69	1.62	-1.16	-0.86	-1.48
0.1339	-0.33	0.69	-0.01	-4.94	-0.49	-0.71	-1.29	1.99	-1.16	-0.58	-1.1
0.134	-0.45	0.91	-0.44	-4.41	0.04	-0.49	-2.22	1.56	-0.69	-0.61	-1.35
0.1341	-1.07	1.22	-0.69	-5	-0.93	-0.59	-1.57	1.12	-1.25	-1.49	-0.42
0.1342	-1.92	0.07	-0.66	-4.85	-1.37	-0.53	-1.23	1.5	-1.63	-1.49	-1.7
0.1343	-0.82	0.88	0.02	-5.04	-0.62	-0.18	-2.1	0.15	-1.38	-0.46	-0.92
0.1344	-0.92	1.19	-0.38	-4.94	0.13	1.13	-1.1	2.15	-1.66	-0.71	-2.13
0.1345	-0.26	2.06	-0.72	-5.07	-0.77	0.29	-0.76	1.68	-1.09	0.07	-2.44
0.1346	-1.85	0.07	-0.6	-5.5	-1.15	-1.24	-0.94	1.53	-0.84	-0.89	0.11
0.1347	-1.92	0.41	-0.57	-5.63	-0.93	0.88	-0.16	1	-1.44	-0.74	-0.73
0.1348	-1.29	-0.12	-0.29	-5.35	0.32	0.35	-1.19	2.4	-1.16	0.2	-0.95
0.1349	-1.92	-0.06	-0.63	-5.5	-1.05	-0.4	-1.16	0.47	-0.97	-0.52	-1.85
0.135	-1.11	1.19	-1.6	-5.32	-1.46	-0.68	-1.07	0.68	-0.84	-1.17	-2.01
0.1351	-1.04	0.38	-0.41	-5.13	-0.62	0.47	-2.35	1.96	-0.94	0.26	-1.16
0.1352	-1.11	-0.9	0.12	-4.85	-0.68	0.57	-1.32	2.24	-0.41	-0.74	-0.92
0.1353	0.05	0.44	-0.69	-4.47	0.16	-0.99	-0.66	1.81	-0.5	-0.39	-1.35
0.1354	-0.04	0.38	-0.97	-5.1	-0.65	-0.84	-1.23	0.68	-1.09	-1.49	-1.57
0.1355	-0.58	0.07	-0.48	-5.75	-0.87	-0.43	-1.19	1.56	-0.41	-1.11	-0.63
0.1356	-0.42	1.57	0.24	-4.47	-0.37	0.32	-1.79	1.87	-0.97	-1.21	-0.38
0.1357	-1.04	-0.12	-0.16	-3.97	-0.03	-0.24	-1.19	0.06	-1	-0.71	-0.73
0.1358	-1.51	0.47	-1.01	-4.22	-1.02	0.38	-3.32	1.43	-0.44	-0.68	-0.45
0.1359	-0.17	1.1	0.18	-5.6	-0.99	0.82	-0.48	1.43	-0.44	-1.08	-1.2
0.136	-0.79	1.41	0.43	-4.66	-0.34	0.54	-1.16	1.68	-0.63	-0.46	-1.35
0.1361	-0.89	2.19	-0.57	-3.66	-1.02	0.16	-1.41	0.75	-1.06	-0.21	-1.7
0.1362	-1.67	0.29	-1.26	-4.85	-0.62	-0.24	-1.32	1.4	-1	0.01	-1.51
0.1363	-0.7	0.75	-0.54	-4.44	-0.59	0.32	-0.48	1.46	-1.09	-0.71	-2.1
0.1364	-1.04	0.47	0.62	-4.85	-1.24	0.38	-0.79	1.46	-1.13	0.14	-1.16
0.1365	-0.48	0.29	-0.44	-4.47	-0.81	-0.74	-1.72	0.34	-0.91	-0.68	-0.82
0.1366	-1.14	0.94	-0.76	-5.41	-0.34	-0.09	-2.07	0.84	-0.84	0.07	-1.91
0.1367	-0.82	1.16	-0.57	-5.19	-0.77	0.01	-1.13	2.15	-1.41	0.35	-1.26
0.1368	-0.82	0.54	-1.38	-4.32	-0.49	0.25	-0.91	1.56	-1.72	-0.68	-1.73
0.1369	-1.36	1.53	-0.32	-4.19	-1.71	-0.4	-1.19	2.21	-0.81	-1.17	-1.07
0.137	-0.36	0.66	-0.01	-4.79	-2.27	0.04	-1.41	1.84	-1.87	0.29	-0.98
0.1371	-1.23	1.07	-0.51	-5.85	-1.37	-0.4	-1.54	2.99	0.4	0.26	-1.35
0.1372	-0.36	1.22	-0.94	-4.91	-1.02	-0.37	-1.16	1.65	-0.69	-1.24	-1.32
0.1373	-0.48	1.81	-0.07	-4.07	-1.05	0.01	-2.26	0.9	-1.38	-0.33	-1.57
0.1374	-1.92	0.54	0.18	-4.72	-1.49	0.04	-2.63	2.81	-1.06	-0.52	-2.41
0.1375	-1.95	0.6	-0.35	-4.1	0.04	-0.43	-3.19	1.09	-0.41	-1.42	-0.92
0.1376	-1.89	0.85	-0.76	-4.79	-0.03	0.44	-1.23	1.06	-1.59	-0.61	-1.98
0.1377	-0.08	1.38	-0.07	-4.88	0.41	-0.43	-1.32	1.53	-1.47	-0.39	-1.79
0.1378	-1.32	1.81	0.02	-4.66	-0.43	0.13	-2.66	2.43	-0.94	-1.08	-0.42
0.1379	-1.45	1.78	-0.54	-5.78	-1.12	-0.68	-2.16	1.37	-1	-1.36	0.27
0.138	0.42	0.66	-0.38	-4.79	-1.12	0.63	-1.13	1.21	-1.13	-0.11	-0.51
0.1381	0.27	1.41	-0.29	-4.82	0.29	0.5	-0.94	2.18	-1.5	-0.46	-1.35
0.1382	-0.58	0.63	-0.04	-4.75	-0.74	-0.9	-0.16	2.65	-1.16	-0.49	-1.26
0.1383	-1.32	0.82	-0.16	-4.35	-0.49	-0.24	-1.07	1.5	-1.13	-0.24	-1.2
0.1384	-1.48	2	-0.82	-4.94	-0.15	-0.21	-1.57	1.37	-0.53	-0.36	-0.82
0.1385	-1.82	0.82	-0.29	-5.44	-0.43	0.16	-0.38	2.34	0.06	-0.21	-1.45
0.1386	-0.48	0.97	-0.32	-4.97	-0.93	0.01	-0.57	2.65	-2.06	-0.43	-1.26
0.1387	-0.73	0.94	-0.54	-4.75	0.79	-0.46	-1.07	2.18	-0.72	0.1	-1.35
0.1388	-0.82	0.66	-1.44	-4.88	0.38	0.29	-1.88	2.34	-0.91	-1.61	-0.85
0.1389	-0.11	2.44	-1.32	-5.1	-0.31	0.44	-0.85	2.49	-1.25	-0.58	-0.13
0.139	-1.23	1.07	-1.1	-5	-0.59	-0.09	-1.38	1.81	-0.78	-0.52	-1.82
0.1391	0.67	0.41	-0.91	-4.38	-0.03	-0.34	-0.16	2.12	-1	-1.17	-0.92
0.1392	-0.33	1.41	-0.66	-4.51	-0.99	-0.37	-2.01	2.28	-1.25	-0.02	-1.38
0.1393	-0.73	-0.37	-0.41	-4.91	-0.62	-0.43	-1.16	2.49	-0.75	-0.02	-1.26
0.1394	-0.2	1.38	-0.29	-4.79	-1.18	-0.12	-1.51	2.21	0.25	-0.68	-1.57
0.1395	-2.45	0.66	0.8	-4.82	-0.9	-1.49	-0.85	1.34	-0.5	-0.55	-0.79
0.1396	-1.2	1.19	-0.07	-5.07	0.32	0.01	-1.04	1.5	-1	0.01	-1.54
0.1397	-2.57	1.81	-1.04	-5.07	0.94	-0.06	-1.19	2.59	-1.41	-0.08	-0.76
0.1398	-1.51	1.1	-0.32	-4.13	-0.27	0.07	-0.38	1.74	-0.84	-0.55	-0.45
0.1399	-1.7	1.57	0.02	-4.85	0.22	-0.99	0.15	0.62	-1.44	0.48	-1.51
0.14	-1.39	3.38	-0.04	-4.66	-0.27	-0.03	-0.76	1.56	-0.03	-1.14	-1.51
0.1401	-1.92	0.19	-1.1	-5.32	-0.06	0.01	-0.29	1.78	-1.09	-1.14	-1.63
0.1402	-0.45	0.1	-1.1	-5.19	-0.99	-1.24	-2.47	1.5	-2.5	-0.52	-1.1
0.1403	-0.67	1.91	0.62	-4.69	-0.4	-0.37	-1.01	1.06	-0.56	-0.18	-0.88
0.1404	-0.79	0.1	-0.16	-5.78	-0.71	1.53	-1.01	1.03	-1.16	-0.99	-1.94
0.1405	-0.04	2.19	0.59	-4.91	-1.46	0.32	-1.82	1.99	-1.41	-0.71	-1.41
0.1406	-1.17	1.72	-0.6	-4.97	-0.93	0.16	-1.79	1.5	-0.5	-0.71	-1.13
0.1407	-0.29	0.75	0.4	-4.85	-0.03	-0.18	-0.98	1.93	-0.41	-0.39	-1.98
0.1408	-0.79	0.82	-0.51	-4.54	-0.9	-0.62	-1.48	1.96	-1.38	0.57	-1.73
0.1409	-2.2	0.57	-0.79	-4.72	-1.02	0.1	-1.29	2.52	-1.19	-0.3	-1.76
0.141	-0.95	0.85	-0.63	-5.41	-1.4	-0.12	-1.29	2.12	0	-0.89	-2.51
0.1411	-2.7	1.44	-0.94	-4.6	-0.65	-0.37	-1.63	2.56	-0.84	0.26	-0.13
0.1412	-0.17	1.57	-0.48	-5.35	0.38	-0.71	-0.38	1.4	-1	-0.86	-0.7
0.1413	-0.79	0.41	0.52	-4.94	-0.4	-0.49	-1.44	1.5	-0.75	1.07	-0.98
0.1414	-2.54	1.47	-0.16	-5.78	-1.02	-0.65	-1.16	2.68	-1.28	-0.39	-1.48
0.1415	-2.07	0.79	-0.04	-4.97	0.01	-0.15	-0.69	1.71	-1.38	-0.52	-1.38
0.1416	-0.82	0.97	-0.38	-3.72	-1.18	-0.53	-1.1	1.59	-0.91	-1.02	-1.1
0.1417	-1.04	1.63	-0.01	-4.88	-0.03	0.35	-0.94	2.18	-0.5	-0.92	-1.23
0.1418	-0.86	0.94	-0.38	-6.56	-0.4	-0.28	-1.54	2.03	-1.5	1.29	-1.63
0.1419	-0.33	1.75	-0.82	-5.07	-0.18	-0.71	-1.48	1.74	-0.63	-0.3	-1.91
0.142	-0.26	0.16	-0.54	-4.54	-0.43	-0.21	-1.48	2.59	-1.22	-0.64	0.08
0.1421	-0.86	1.22	0.18	-4.79	-0.4	-0.06	-0.88	0.78	-1.44	-0.24	-0.1
0.1422	-1.57	1.07	-0.32	-4.88	-0.52	-0.18	-0.85	1.06	-0.31	-0.21	-1.35
0.1423	-0.33	0.19	-0.07	-5.19	0.1	0.07	-1.35	2.74	-0.81	-0.33	-1.51
0.1424	-1.36	0.6	-0.16	-4.35	-0.96	0.01	-1.57	2.31	-1.31	-0.39	-1.41
0.1425	-2.14	0.72	-0.01	-4.94	-1.62	0.47	-0.91	1.78	-1.19	-0.43	-0.73
0.1426	-0.04	0.82	-0.19	-5.29	-0.96	-0.06	-1.32	1.37	-0.81	-1.33	-0.95
0.1427	-2.23	3.06	-0.54	-4.69	-0.81	-0.18	-1.57	1.93	0	-0.43	-1.38
0.1428	-1.67	2.25	-0.48	-5.29	-0.15	-0.34	-1.51	1.34	-1.22	-0.05	-2.04
0.1429	-0.48	0.94	-0.23	-4.16	-0.93	0.1	-1.38	0.62	0.18	-0.3	-0.7
0.143	-3.04	0.25	0.27	-5.16	-1.77	-0.34	-1.82	2.31	-1.41	-1.61	-0.95
0.1431	-1.2	0.25	-0.29	-5.04	-1.02	-0.99	-1.04	1.9	-0.13	0.2	-1.54
0.1432	-1.67	0.41	-0.19	-4.19	-1.3	0.16	-1.32	2.09	-1	-0.74	-0.35
0.1433	-2.32	1.91	-0.69	-5.29	-1.27	-0.18	-1.66	1.53	-0.94	-0.68	-0.38
0.1434	-1.67	1.16	-0.48	-4.29	0.69	0.25	-1.54	1.59	-1.22	-0.61	-0.88
0.1435	-2.51	0.85	0.52	-4.94	-1.15	-0.71	-1.19	1.78	-0.88	-0.71	-0.95
0.1436	-1.51	1.35	0.49	-5.07	-0.9	-0.31	-1.72	1.46	-0.22	-0.52	-0.67
0.1437	-0.82	0.63	-0.19	-4.1	-0.77	-0.93	-1.19	2.68	-1.75	-0.86	-1.35
0.1438	-1.36	0.32	0.06	-4.94	-0.99	-0.77	-0.82	2.12	-0.81	-0.52	-0.95
0.1439	-0.82	0.63	-0.54	-5.16	-1.34	-2.05	-1.41	1.56	-1.31	-0.49	-1.01
0.144	-0.23	1.35	-1.5	-4.69	0.35	-0.93	-1.97	1.28	-1.56	0.01	-1.16
0.1441	-0.76	1.03	-0.13	-4.72	-1.37	-0.9	-1.88	2.28	-1.31	-0.46	-0.95
0.1442	-0.01	0.19	-0.16	-5.69	-1.02	0.04	-1.26	2.15	-0.38	-1.58	-0.76
0.1443	-1.76	0.97	-0.66	-6.22	-1.12	-0.65	-1.1	2.9	-1.22	-0.36	-0.76
0.1444	-1.57	1	-0.54	-4.88	0.13	0.32	-1.01	1.18	-1.41	-0.08	-0.98
0.1445	-1.07	1.38	-0.32	-4.57	-0.15	-0.77	-1.35	2.43	-0.72	-0.39	-2.41
0.1446	-2.63	0.38	0.4	-5.22	-1.52	0.75	-0.79	2.12	-1.31	-0.11	-1.23
0.1447	-2.01	0.72	-0.57	-6.44	-1.3	0.1	-0.35	1.37	-1.5	-0.33	-0.51
0.1448	-0.54	1.07	-0.82	-5.6	-0.31	0.13	-1.01	1.9	-1.06	-0.74	-0.67
0.1449	-1.11	2.28	-0.35	-4.51	0.07	-0.12	-1.16	3.18	-1.56	-0.8	-1.48
0.145	0.11	1.22	-0.41	-5.44	0.26	-0.15	-0.38	1.93	-1.44	-0.21	-1.38
0.1451	-1.45	-0.31	-0.32	-5.91	-0.68	-0.65	-0.35	1.93	-0.44	-1.21	-0.63
0.1452	-1.23	0.69	-0.32	-5.04	-1.52	-0.71	-1.29	2.06	-0.94	-0.18	-0.54
0.1453	-1.11	0.41	-0.23	-4.38	-1.84	-0.03	-2.47	1.65	-0.84	-0.71	-1.29
0.1454	-0.45	0.1	-1.29	-4.85	-0.18	0.72	-3.04	2.4	-0.97	-0.43	-0.92
0.1455	-1.48	-0.06	-0.48	-5.1	-0.93	-0.21	-1.01	1.78	-0.75	-1.21	-1.23
0.1456	-1.26	0.69	-0.51	-4.75	-0.99	-0.12	-1.72	2.4	0	-0.43	-0.88
0.1457	-2.39	0.38	-0.29	-4.19	-0.93	-0.4	-2.72	2.59	-0.31	-0.52	-0.67
0.1458	-0.11	2.94	-0.13	-4.82	-1.12	0.01	-1.79	1.59	-0.41	0.01	-0.13
0.1459	-0.76	1.69	-0.6	-4.19	-0.52	-0.56	-1.91	1.78	-1.09	0.6	-0.82
0.146	-0.14	-0.15	-0.04	-4.97	-0.81	-0.77	-1.19	2.56	-1	-0.89	-1.51
0.1461	-1.89	1.22	-0.1	-5.53	-2.12	-1.37	-1.07	1.62	-0.47	0.32	-0.1
0.1462	-2.48	0.19	-0.66	-5.19	-0.65	0.1	-1.29	2.24	-0.56	0.29	-1.13
0.1463	-1.82	0.94	-0.48	-4.35	-0.84	0.13	-2.26	1.59	-0.41	-0.49	-1.63
0.1464	-1.17	1	-1.29	-4.94	0.72	-0.56	-1.79	1.53	-1.22	-0.39	-1.7
0.1465	-2.23	0.72	-0.38	-4.91	-0.81	-0.12	-1.29	1.65	-0.06	-1.36	-0.67
0.1466	0.52	0.5	-0.1	-4.94	-1.15	0.5	-2.66	2.21	-1.16	-0.61	-0.85
0.1467	-0.82	1.13	-0.51	-4.94	-0.87	-1.12	-1.88	1.03	-1.06	-1.36	-1.07
0.1468	-1.51	0.75	-1.22	-4.63	-1.18	0.04	-1.91	1.5	-0.78	-0.49	-0.92
0.1469	-1.36	0.69	-0.38	-5.41	-0.87	0.25	-1.38	1.84	-1.47	0.42	-1.48
0.147	-1.01	0.1	-0.88	-4.22	-0.18	0.04	-0.04	1.71	-1	-0.49	-1.16
0.1471	-1.98	0.47	-0.23	-4.44	-1.27	-0.71	-1.97	3.18	-1.06	-0.8	-0.88
0.1472	-1.23	-0.06	0.02	-5.07	-1.46	-0.68	-1.91	1.68	-1.31	0.01	-1.45
0.1473	-1.45	0.79	-0.32	-5.1	-1.24	-0.03	-1.88	1.99	-0.72	-0.74	-0.82
0.1474	-1.36	2.06	-0.44	-4.6	-0.4	-0.18	-2.79	1.43	-0.35	-0.27	-0.82
0.1475	-0.79	1.81	-0.38	-3.69	-0.4	-0.46	-2.69	1.78	-1.22	-0.27	-0.38
0.1476	-1.54	0.57	0.02	-5	-0.31	-0.49	-2.47	1.62	-0.28	-1.71	-1.63
0.1477	-1.11	1.66	-0.32	-4.75	-1.4	-0.37	-1.82	2.21	-0.91	-0.36	-2.01
0.1478	-2.17	0.29	-0.82	-5.07	-0.12	-0.28	-1.41	2.03	-0.31	-0.02	-0.35
0.1479	-0.86	0.32	-0.69	-5.69	0.72	-1.02	-2.32	2.43	-1.13	-0.11	-0.73
0.148	-0.79	0.38	-0.19	-4.85	-0.99	-0.99	-1.79	2.49	-1.63	-0.21	-0.76
0.1481	-2.04	0.63	0.59	-5.04	-0.77	-1.15	-1.66	1.28	-1.03	-0.92	-1.51
0.1482	-0.2	0.32	-0.82	-5.07	-0.77	-0.34	-1.63	1.9	-1.41	-0.8	-0.85
0.1483	-1.92	1.22	-0.76	-4.88	-0.84	0.91	-0.79	2.03	-1.5	-0.83	-0.92
0.1484	-1.7	1.13	-0.72	-5.13	-0.62	-0.74	-1.44	1.15	-0.47	0.01	-0.73
0.1485	1.11	1.13	-0.6	-4.97	-0.49	-0.46	-1.07	1.81	-2.12	-0.58	-1.35
0.1486	-1.82	-0.37	-0.6	-4.01	-0.68	0.32	-0.51	1.99	-1.38	-1.71	-1.48
0.1487	-0.76	0.19	-1.91	-4.79	-0.46	-0.59	-1.13	2.4	-0.81	-0.92	-1.57
0.1488	-1.64	0.32	-1.19	-5.04	-1.02	-0.49	-1.38	1	-1.41	-0.3	-0.82
0.1489	-1.23	0.82	-0.69	-4.94	-2.4	-1.09	-0.57	2.06	-0.38	-0.49	-1.51
0.149	-0.39	1.13	-1.13	-4.35	-0.59	-0.43	-1.19	1.78	-0.35	-0.14	-0.85
0.1491	-0.26	1.63	-1.5	-5	-0.87	-0.87	-1.07	0.81	-1.72	-0.21	-0.98
0.1492	-1.64	0.13	-0.6	-5	-0.12	-0.21	-1.57	2.84	-1.09	-0.68	-1.1
0.1493	-1.32	1.44	-0.66	-4.35	-1.15	-0.37	-1.1	1.25	-0.88	-0.96	-0.51
0.1494	-1.51	1.94	-0.51	-4.51	-1.37	0.22	-1.57	1.5	-0.16	0.07	-0.82
0.1495	-0.98	1.38	-0.97	-4.6	-1.49	-0.37	-1.29	2.18	-0.69	-0.3	-0.51
0.1496	-0.26	1.28	-0.29	-5.16	-2.08	0.38	-1.54	1.4	-1.59	-0.3	-1.01
0.1497	-1.85	0.6	-0.69	-4.97	-0.4	-0.03	-1.13	2.46	-1.09	-0.8	-0.67
0.1498	-1.76	0.97	-0.41	-4.75	-0.43	-0.49	-0.57	0.81	-1.25	-0.96	-0.38
0.1499	-1.54	0.72	-0.44	-5.04	-1.52	0.91	-0.51	1.4	-0.6	-1.36	0.36
0.15	-1.04	0.82	-0.23	-4.1	-1.43	-0.9	-1.48	1.34	-1.06	-0.96	-1.57
0.1501	-0.33	0.79	0.06	-5.04	-0.77	-0.18	-1.63	1.68	-1.41	-2.24	-1.1
0.1502	-0.23	1.57	-0.54	-4.97	-0.87	-0.74	-0.85	1.21	-1.06	-1.92	-0.67
0.1503	-1.29	0.5	-1.04	-4.35	0.1	0.29	-0.94	1.84	-1.25	-0.74	-0.45
0.1504	-0.45	1.25	-0.66	-4.72	-1.15	-0.12	-1.76	1.71	-1.44	-1.42	-1.04
0.1505	-1.42	1.22	-0.66	-4.41	-2.52	-0.93	-1.72	0.65	-0.13	-1.67	-2.13
0.1506	-0.45	1.28	-0.48	-5	0.16	0.16	-1.85	1.5	-0.69	-0.58	-0.51
0.1507	-1.32	0.97	0.34	-4.82	1.78	0.47	-1.82	1.84	-1.38	-0.64	-1.16
[truncated: 23,013 more rows]

## Sheet: 3 E
unc-13
[truncated: 20,136 more rows]

## Sheet: 3 F
wild type	unc-13
53	70.13
56.3	43.05
34.3	54.89
[truncated: 16 more rows]

## Sheet: 3 G
Time (s)																												Mean	SEM
[truncated: 27 more rows]

[truncated: 6 more sheets: 3 H, 3 I, 3 J, 3 K, 3 L, 3 M]
