# Supplementary material for: All-optical closed-loop voltage clamp for precise control of muscles and neurons in live animals
Source: Research Square preprint supplement (doi:10.21203/rs.3.rs-1505565/v1), 2023-03-29
Supplement: Supplementary file 10 [file 8d9019bde7b61cd58324b415.xlsx]

## Sheet: Figure 6B-D
Title: 1 Date: 2020/07/31 16:03
Parameters for step (1): Holding dF/F0: 0.0 % Tolerance range: -0.0050 - 0.0050 % Exposure time: 10 ms Binning: 4x4
Parameters for step (2): Holding dF/F0: -5.0 % Tolerance range: -5.005 - -4.995 %
Parameters for step (3): Holding dF/F0: 5.0 % Tolerance range: 4.995 - 5.005 %
Bleaching correction function: exp. offset = 6867,69 * exp(-0,0025 * x) + 16292,26 R^2: 0,8925 Video duration: 35,58 s Framerate: 90,22
# Measurement	Time	F	F_bleach_correct	dF/F0	dF/F0_bleach_correct	Wavelength	Info	Step
0	0.0111	18608.1		?	0	600	Calibration	-
1	0.0222	18598.6		?	0	600	Calibration	-
2	0.0333	18504.1		?	0	600	Calibration	-
3	0.0443	18678.5		?	0	600	Calibration	-
4	0.0554	18817.7		?	0	600	Calibration	-
5	0.0665	18975.6		?	0	600	Calibration	-
6	0.0776	19228.8		?	0	600	Calibration	-
7	0.0887	19457		?	0	600	Calibration	-
8	0.0998	19681.7		?	0	600	Calibration	-
9	0.1108	20056.8		?	0	600	Calibration	-
10	0.1219	20373.4		?	0	600	Calibration	-
11	0.133	20661.2		?	0	600	Calibration	-
12	0.1441	21118.2		?	0	600	Calibration	-
13	0.1552	21575.4		?	0	600	Calibration	-
14	0.1663	22030.5		?	0	600	Calibration	-
15	0.1774	22325.8		?	0	600	Calibration	-
16	0.1884	22592.5		?	0	600	Calibration	-
17	0.1995	22762.5		?	0	600	Calibration	-
18	0.2106	22869.3		?	0	600	Calibration	-
19	0.2217	23039.3		?	0	600	Calibration	-
20	0.2328	23055.5		?	0	600	Calibration	-
21	0.2439	22985.9		?	0	600	Calibration	-
22	0.2549	23162.8		?	0	600	Calibration	-
23	0.266	23194.5		?	0	600	Calibration	-
24	0.2771	23234.4		?	0	600	Calibration	-
25	0.2882	23240.1		?	0	600	Calibration	-
26	0.2993	22954.6		?	0	600	Calibration	-
27	0.3104	22703.5		?	0	600	Calibration	-
28	0.3214	22843.2		?	0	600	Calibration	-
29	0.3325	22769.8		?	0	600	Calibration	-
30	0.3436	22746.5		?	0	600	Calibration	-
31	0.3547	22846.9		?	0	600	Calibration	-
32	0.3658	23040.5		?	0	600	Calibration	-
33	0.3769	22787.1		?	0	600	Calibration	-
34	0.388	22956.2		?	0	600	Calibration	-
35	0.399	23201.3		?	0	600	Calibration	-
36	0.4101	22647.2		?	0	600	Calibration	-
37	0.4212	21998.6		?	0	600	Calibration	-
38	0.4323	22176.3		?	0	600	Calibration	-
39	0.4434	22532.4		?	0	600	Calibration	-
40	0.4545	23014.3		?	0	600	Calibration	-
41	0.4655	23076.5		?	0	600	Calibration	-
42	0.4766	22348.8		?	0	600	Calibration	-
43	0.4877	22617.2		?	0	600	Calibration	-
44	0.4988	23086		?	0	600	Calibration	-
45	0.5099	23477.9		?	0	600	Calibration	-
46	0.521	23786.2		?	0	600	Calibration	-
47	0.5321	23168.4		?	0	600	Calibration	-
48	0.5431	21824.6		?	0	600	Calibration	-
49	0.5542	21671.7		?	0	600	Calibration	-
50	0.5653	22049.2		?	0	600	Calibration	-
51	0.5764	22791.4		?	0	600	Calibration	-
52	0.5875	23495.3		?	0	600	Calibration	-
53	0.5986	23931.2		?	0	600	Calibration	-
54	0.6096	24073.5		?	0	600	Calibration	-
55	0.6207	22459.2		?	0	600	Calibration	-
56	0.6318	18506.6		?	0	600	Calibration	-
57	0.6429	16609.2		?	0	600	Calibration	-
58	0.654	16590.3		?	0	600	Calibration	-
59	0.6651	16857.5		?	0	600	Calibration	-
60	0.6761	17210		?	0	600	Calibration	-
61	0.6872	17830.2		?	0	600	Calibration	-
62	0.6983	19245.2		?	0	600	Calibration	-
63	0.7094	23100.8		?	0	600	Calibration	-
64	0.7205	25040		?	0	600	Calibration	-
65	0.7316	25515.3		?	0	600	Calibration	-
66	0.7427	25549.6		?	0	600	Calibration	-
67	0.7537	25190.1		?	0	600	Calibration	-
68	0.7648	25043.7		?	0	600	Calibration	-
69	0.7759	24987.2		?	0	600	Calibration	-
70	0.787	24548.7		?	0	600	Calibration	-
71	0.7981	23595		?	0	600	Calibration	-
72	0.8092	23735.6		?	0	600	Calibration	-
73	0.8202	23502.5		?	0	600	Calibration	-
74	0.8313	22196.6		?	0	600	Calibration	-
75	0.8424	17130.9		?	0	600	Calibration	-
76	0.8535	16532		?	0	600	Calibration	-
77	0.8646	16569.6		?	0	600	Calibration	-
78	0.8757	16853.5		?	0	600	Calibration	-
79	0.8868	17266.1		?	0	600	Calibration	-
80	0.8978	17845.5		?	0	600	Calibration	-
81	0.9089	19364.9		?	0	600	Calibration	-
82	0.92	23423.7		?	0	600	Calibration	-
83	0.9311	25237.6		?	0	600	Calibration	-
84	0.9422	25632.7		?	0	600	Calibration	-
85	0.9533	25734.1		?	0	600	Calibration	-
86	0.9643	25142.5		?	0	600	Calibration	-
87	0.9754	25109.9		?	0	600	Calibration	-
88	0.9865	25007.3		?	0	600	Calibration	-
89	0.9976	24396.6		?	0	600	Calibration	-
90	1.0087	24149.6		?	0	600	Calibration	-
91	1.0198	24120		?	0	600	Calibration	-
92	1.0309	23459.5		?	0	600	Calibration	-
93	1.0419	22894.6		?	0	600	Calibration	-
94	1.053	19553.4		?	0	600	Calibration	-
95	1.0641	16634		?	0	600	Calibration	-
96	1.0752	16523		?	0	600	Calibration	-
97	1.0863	16655.7		?	0	600	Calibration	-
98	1.0974	17003.5		?	0	600	Calibration	-
99	1.1084	17430.7		?	0	600	Calibration	-
100	1.1195	18153.5		?	0	600	Calibration	-
101	1.1306	20027		?	0	600	Calibration	-
102	1.1417	24230		?	0	600	Calibration	-
103	1.1528	25284		?	0	600	Calibration	-
104	1.1639	25603		?	0	600	Calibration	-
105	1.1749	25437.8		?	0	600	Calibration	-
106	1.186	25047.3		?	0	600	Calibration	-
107	1.1971	25122.8		?	0	600	Calibration	-
108	1.2082	25018.3		?	0	600	Calibration	-
109	1.2193	24611.9		?	0	600	Calibration	-
110	1.2304	24161.9		?	0	600	Calibration	-
111	1.2415	24184.3		?	0	600	Calibration	-
112	1.2525	23757.1		?	0	600	Calibration	-
113	1.2636	22263.5		?	0	600	Calibration	-
114	1.2747	16960.4		?	0	600	Calibration	-
115	1.2858	16439.1		?	0	600	Calibration	-
116	1.2969	16503.8		?	0	600	Calibration	-
117	1.308	16740		?	0	600	Calibration	-
118	1.319	17048.2		?	0	600	Calibration	-
119	1.3301	17604.8		?	0	600	Calibration	-
120	1.3412	18501.9		?	0	600	Calibration	-
121	1.3523	21324.5		?	0	600	Calibration	-
122	1.3634	24740.2		?	0	600	Calibration	-
123	1.3745	25332.3		?	0	600	Calibration	-
124	1.3856	25533.6		?	0	600	Calibration	-
125	1.3966	24899.2		?	0	600	Calibration	-
126	1.4077	24879.9		?	0	600	Calibration	-
127	1.4188	25179.2		?	0	600	Calibration	-
128	1.4299	24716		?	0	600	Calibration	-
129	1.441	23986.8		?	0	600	Calibration	-
130	1.4521	24154.8		?	0	600	Calibration	-
131	1.4631	24206		?	0	600	Calibration	-
132	1.4742	23950.2		?	0	600	Calibration	-
133	1.4853	21103.3		?	0	600	Calibration	-
134	1.4964	16611.2		?	0	600	Calibration	-
135	1.5075	16350.5		?	0	600	Calibration	-
136	1.5186	16464.5		?	0	600	Calibration	-
137	1.5297	16736.6		?	0	600	Calibration	-
138	1.5407	17095.6		?	0	600	Calibration	-
139	1.5518	17581.1		?	0	600	Calibration	-
140	1.5629	18479.9		?	0	600	Calibration	-
141	1.574	21479.5		?	0	600	Calibration	-
142	1.5851	24602.2		?	0	600	Calibration	-
143	1.5962	25263.3		?	0	600	Calibration	-
144	1.6072	25401.6		?	0	600	Calibration	-
145	1.6183	24754.1		?	0	600	Calibration	-
146	1.6294	24786.2		?	0	600	Calibration	-
147	1.6405	24905.9		?	0	600	Calibration	-
148	1.6516	24569		?	0	600	Calibration	-
149	1.6627	24303.2		?	0	600	Calibration	-
150	1.6737	24224.6		?	0	600	Calibration	-
151	1.6848	23869.5		?	0	600	Calibration	-
152	1.6959	23394		?	0	600	Calibration	-
153	1.707	22681.2		?	0	600	Calibration	-
154	1.7181	18848.5		?	0	600	Calibration	-
155	1.7292	16382.8		?	0	600	Calibration	-
156	1.7403	16277.1		?	0	600	Calibration	-
157	1.7513	16403.8		?	0	600	Calibration	-
158	1.7624	16714.6		?	0	600	Calibration	-
159	1.7735	17063.7		?	0	600	Calibration	-
160	1.7846	17590.4		?	0	600	Calibration	-
161	1.7957	18589.5		?	0	600	Calibration	-
162	1.8068	21853.7		?	0	600	Calibration	-
163	1.8178	24473.5		?	0	600	Calibration	-
164	1.8289	25126.9		?	0	600	Calibration	-
165	1.84	25237.4		?	0	600	Calibration	-
166	1.8511	24986.8		?	0	600	Calibration	-
167	1.8622	24607.1		?	0	600	Calibration	-
168	1.8733	24524.9		?	0	600	Calibration	-
169	1.8844	24373		?	0	600	Calibration	-
170	1.8954	24131.3		?	0	600	Calibration	-
171	1.9065	23850		?	0	600	Calibration	-
172	1.9176	23901.9		?	0	600	Calibration	-
173	1.9287	23544.7		?	0	600	Calibration	-
174	1.9398	23077.7		?	0	600	Calibration	-
175	1.9509	19118.1		?	0	600	Calibration	-
176	1.9619	16343		?	0	600	Calibration	-
177	1.973	16197.5		?	0	600	Calibration	-
178	1.9841	16330.2		?	0	600	Calibration	-
179	1.9952	16579.3		?	0	600	Calibration	-
180	2.0063	17002.2		?	0	600	Calibration	-
181	2.0174	17438.8		?	0	600	Calibration	-
182	2.0284	18198.3		?	0	600	Calibration	-
183	2.0395	20232.6		?	0	600	Calibration	-
184	2.0506	23960.8		?	0	600	Calibration	-
185	2.0617	24805.2		?	0	600	Calibration	-
186	2.0728	24985.1		?	0	600	Calibration	-
187	2.0839	25013.6		?	0	600	Calibration	-
188	2.095	24350.5		?	0	600	Calibration	-
189	2.106	24471.9		?	0	600	Calibration	-
190	2.1171	24374.4		?	0	600	Calibration	-
191	2.1282	23817.8		?	0	600	Calibration	-
192	2.1393	23289		?	0	600	Calibration	-
193	2.1504	22970.4		?	0	600	Calibration	-
194	2.1615	22747.8		?	0	600	Calibration	-
195	2.1725	21012.7		?	0	600	Calibration	-
196	2.1836	16405.2		?	0	600	Calibration	-
197	2.1947	16149.4		?	0	600	Calibration	-
198	2.2058	16163.7		?	0	600	Calibration	-
199	2.2169	16407.6		?	0	600	Calibration	-
200	2.228	16731.8		?	0	600	Calibration	-
201	2.2391	17129.6		?	0	600	Calibration	-
202	2.2501	17616.8		?	0	600	Calibration	-
203	2.2612	18571.2		?	0	600	Calibration	-
204	2.2723	21674.4		?	0	600	Calibration	-
205	2.2834	24202.3		?	0	600	Calibration	-
206	2.2945	24777.3		?	0	600	Calibration	-
207	2.3056	24887		?	0	600	Calibration	-
208	2.3166	24853.4		?	0	600	Calibration	-
209	2.3277	24455		?	0	600	Calibration	-
210	2.3388	24356.7		?	0	600	Calibration	-
211	2.3499	24193.6		?	0	600	Calibration	-
212	2.361	23569.5		?	0	600	Calibration	-
213	2.3721	23279.2		?	0	600	Calibration	-
214	2.3832	23117.9		?	0	600	Calibration	-
215	2.3942	22976.4		?	0	600	Calibration	-
216	2.4053	22488.1		?	0	600	Calibration	-
217	2.4164	19500.3		?	0	600	Calibration	-
218	2.4275	16252.8		?	0	600	Calibration	-
219	2.4386	16048.9		?	0	600	Calibration	-
220	2.4497	16183.5		?	0	600	Calibration	-
221	2.4607	16421.7		?	0	600	Calibration	-
222	2.4718	16761		?	0	600	Calibration	-
223	2.4829	17131.5		?	0	600	Calibration	-
224	2.494	17572.3		?	0	600	Calibration	-
225	2.5051	18430.2		?	0	600	Calibration	-
226	2.5162	21073.6		?	0	600	Calibration	-
227	2.5272	23910.3		?	0	600	Calibration	-
228	2.5383	24492.3		?	0	600	Calibration	-
229	2.5494	24661.2		?	0	600	Calibration	-
230	2.5605	24649.4		?	0	600	Calibration	-
231	2.5716	24296.1		?	0	600	Calibration	-
232	2.5827	24111.6		?	0	600	Calibration	-
233	2.5938	23923.2		?	0	600	Calibration	-
234	2.6048	23711.8		?	0	600	Calibration	-
235	2.6159	23535.7		?	0	600	Calibration	-
236	2.627	23225.6		?	0	600	Calibration	-
237	2.6381	22811.8		?	0	600	Calibration	-
238	2.6492	22163.4		?	0	600	Calibration	-
239	2.6603	17702.1		?	0	600	Calibration	-
240	2.6713	16095		?	0	600	Calibration	-
241	2.6824	16044.1		?	0	600	Calibration	-
242	2.6935	16171.3		?	0	600	Calibration	-
243	2.7046	16444		?	0	600	Calibration	-
244	2.7157	16787.2		?	0	600	Calibration	-
245	2.7268	17147.4		?	0	600	Calibration	-
246	2.7379	17603.9		?	0	600	Calibration	-
247	2.7489	18428.2		?	0	600	Calibration	-
248	2.76	21009.9		?	0	600	Calibration	-
249	2.7711	23854		?	0	600	Calibration	-
250	2.7822	24317.4		?	0	600	Calibration	-
251	2.7933	24534.8		?	0	600	Calibration	-
252	2.8044	24481.5		?	0	600	Calibration	-
253	2.8154	24418.3		?	0	600	Calibration	-
254	2.8265	24185.4		?	0	600	Calibration	-
255	2.8376	23993.9		?	0	600	Calibration	-
256	2.8487	23712.8		?	0	600	Calibration	-
257	2.8598	23393.9		?	0	600	Calibration	-
258	2.8709	23050.7		?	0	600	Calibration	-
259	2.882	22776.5		?	0	600	Calibration	-
260	2.893	22058.8		?	0	600	Calibration	-
261	2.9041	17375.8		?	0	600	Calibration	-
262	2.9152	16011.4		?	0	600	Calibration	-
263	2.9263	16008.6		?	0	600	Calibration	-
264	2.9374	16124.8		?	0	600	Calibration	-
265	2.9485	16394.4		?	0	600	Calibration	-
266	2.9595	16722.3		?	0	600	Calibration	-
267	2.9706	17049.1		?	0	600	Calibration	-
268	2.9817	17478.9		?	0	600	Calibration	-
269	2.9928	18164.1		?	0	600	Calibration	-
270	3.0039	19568		?	0	600	Calibration	-
271	3.015	23122.2		?	0	600	Calibration	-
272	3.026	24017.5		?	0	600	Calibration	-
273	3.0371	24304.1		?	0	600	Calibration	-
274	3.0482	24332.6		?	0	600	Calibration	-
275	3.0593	24252.7		?	0	600	Calibration	-
276	3.0704	24118.4		?	0	600	Calibration	-
277	3.0815	23883.1		?	0	600	Calibration	-
278	3.0926	23616.3		?	0	600	Calibration	-
279	3.1036	23301.7		?	0	600	Calibration	-
280	3.1147	23012.4		?	0	600	Calibration	-
281	3.1258	22623.4		?	0	600	Calibration	-
282	3.1369	22066.3		?	0	600	Calibration	-
283	3.148	17688.7		?	0	600	Calibration	-
284	3.1591	15957.9		?	0	600	Calibration	-
285	3.1701	15904.8		?	0	600	Calibration	-
286	3.1812	16040.5		?	0	600	Calibration	-
287	3.1923	16279.5		?	0	600	Calibration	-
288	3.2034	16609		?	0	600	Calibration	-
289	3.2145	16906		?	0	600	Calibration	-
290	3.2256	17328.7		?	0	600	Calibration	-
291	3.2367	17882.4		?	0	600	Calibration	-
292	3.2477	18621		?	0	600	Calibration	-
293	3.2588	21525.4		?	0	600	Calibration	-
294	3.2699	23573.7		?	0	600	Calibration	-
295	3.281	23972.2		?	0	600	Calibration	-
296	3.2921	24042.7		?	0	600	Calibration	-
297	3.3032	24107.9		?	0	600	Calibration	-
298	3.3142	23840.3		?	0	600	Calibration	-
299	3.3253	23704.9		?	0	600	Calibration	-
300	3.3364	23486.1		?	0	600	Calibration	-
301	3.3475	23254.5		?	0	600	Calibration	-
302	3.3586	22902.9		?	0	600	Calibration	-
303	3.3697	22556.8		?	0	600	Calibration	-
304	3.3807	21862.2		?	0	600	Calibration	-
305	3.3918	17836.4		?	0	600	Calibration	-
306	3.4029	15933.3		?	0	600	Calibration	-
307	3.414	15855		?	0	600	Calibration	-
308	3.4251	15986.3		?	0	600	Calibration	-
309	3.4362	16158.3		?	0	600	Calibration	-
310	3.4473	16545.5		?	0	600	Calibration	-
311	3.4583	16866.3		?	0	600	Calibration	-
312	3.4694	17182.5		?	0	600	Calibration	-
313	3.4805	17607.4		?	0	600	Calibration	-
314	3.4916	18151.4		?	0	600	Calibration	-
315	3.5027	19307.5		?	0	600	Calibration	-
316	3.5138	22597		?	0	600	Calibration	-
317	3.5248	23633.4		?	0	600	Calibration	-
318	3.5359	23912.2		?	0	600	Calibration	-
319	3.547	23921.8		?	0	600	Calibration	-
320	3.5581	23871.4		?	0	600	Calibration	-
321	3.5692	23683.1		?	0	600	Calibration	-
322	3.5803	23504.4		?	0	600	Calibration	-
323	3.5914	23261.6		?	0	600	Calibration	-
324	3.6024	23006.6		?	0	600	Calibration	-
325	3.6135	22697.1		?	0	600	Calibration	-
326	3.6246	22183.9		?	0	600	Calibration	-
327	3.6357	20426		?	0	600	Calibration	-
328	3.6468	16064.7		?	0	600	Calibration	-
329	3.6579	15832.6		?	0	600	Calibration	-
330	3.6689	15872.1		?	0	600	Calibration	-
331	3.68	16042.7		?	0	600	Calibration	-
332	3.6911	16297.6		?	0	600	Calibration	-
333	3.7022	16580.7		?	0	600	Calibration	-
334	3.7133	16875.8		?	0	600	Calibration	-
335	3.7244	17243.8		?	0	600	Calibration	-
336	3.7355	17711.9		?	0	600	Calibration	-
337	3.7465	18170.9		?	0	600	Calibration	-
338	3.7576	19247.1		?	0	600	Calibration	-
339	3.7687	22452.9		?	0	600	Calibration	-
340	3.7798	23491.8		?	0	600	Calibration	-
341	3.7909	23709.9		?	0	600	Calibration	-
342	3.802	23735.8		?	0	600	Calibration	-
343	3.813	23673.3		?	0	600	Calibration	-
344	3.8241	23527.7		?	0	600	Calibration	-
345	3.8352	23247		?	0	600	Calibration	-
346	3.8463	23042.3		?	0	600	Calibration	-
347	3.8574	22780.5		?	0	600	Calibration	-
348	3.8685	22372.1		?	0	600	Calibration	-
349	3.8795	21771.6		?	0	600	Calibration	-
350	3.8906	18515.9		?	0	600	Calibration	-
351	3.9017	15862.5		?	0	600	Calibration	-
352	3.9128	15789.1		?	0	600	Calibration	-
353	3.9239	15873.5		?	0	600	Calibration	-
354	3.935	16095.4		?	0	600	Calibration	-
355	3.9461	16314.3		?	0	600	Calibration	-
356	3.9571	16618.6		?	0	600	Calibration	-
357	3.9682	16860.3		?	0	600	Calibration	-
358	3.9793	17242.3		?	0	600	Calibration	-
359	3.9904	17563.7		?	0	600	Calibration	-
360	4.0015	17961.4		?	0	600	Calibration	-
361	4.0126	18474.4		?	0	600	Calibration	-
362	4.0236	20749.4		?	0	600	Calibration	-
363	4.0347	22955.1		?	0	600	Calibration	-
364	4.0458	23358.8		?	0	600	Calibration	-
365	4.0569	23411.5		?	0	600	Calibration	-
366	4.068	23367.3		?	0	600	Calibration	-
367	4.0791	23197.5		?	0	600	Calibration	-
368	4.0902	23011.8		?	0	600	Calibration	-
369	4.1012	22739.6		?	0	600	Calibration	-
370	4.1123	22376		?	0	600	Calibration	-
371	4.1234	22011.5		?	0	600	Calibration	-
372	4.1345	21401.9		?	0	600	Calibration	-
373	4.1456	18398.7		?	0	600	Calibration	-
374	4.1567	15687		?	0	600	Calibration	-
375	4.1677	15599.6		?	0	600	Calibration	-
376	4.1788	15728.7		?	0	600	Calibration	-
377	4.1899	15852.8		?	0	600	Calibration	-
378	4.201	16145.8		?	0	600	Calibration	-
379	4.2121	16402.9		?	0	600	Calibration	-
380	4.2232	16662.3		?	0	600	Calibration	-
381	4.2342	16958.5		?	0	600	Calibration	-
382	4.2453	17290.9		?	0	600	Calibration	-
383	4.2564	17590.3		?	0	600	Calibration	-
384	4.2675	17838		?	0	600	Calibration	-
385	4.2786	18347.9		?	0	600	Calibration	-
386	4.2897	20256.4		?	0	600	Calibration	-
387	4.3008	22446.3		?	0	600	Calibration	-
388	4.3118	22922.5		?	0	600	Calibration	-
389	4.3229	23082.6		?	0	600	Calibration	-
390	4.334	23054.1		?	0	600	Calibration	-
391	4.3451	22934.8		?	0	600	Calibration	-
392	4.3562	22798.7		?	0	600	Calibration	-
393	4.3673	22477.1		?	0	600	Calibration	-
394	4.3783	22143.9		?	0	600	Calibration	-
395	4.3894	21765.6		?	0	600	Calibration	-
396	4.4005	21229.5		?	0	600	Calibration	-
397	4.4116	18517.4		?	0	600	Calibration	-
398	4.4227	15644.6		?	0	600	Calibration	-
399	4.4338	15553.9		?	0	600	Calibration	-
400	4.4449	15594.3		?	0	600	Calibration	-
401	4.4559	15781.5		?	0	600	Calibration	-
402	4.467	16080.5		?	0	600	Calibration	-
403	4.4781	16375.5		?	0	600	Calibration	-
404	4.4892	16571.2		?	0	600	Calibration	-
405	4.5003	16859.3		?	0	600	Calibration	-
406	4.5114	17234.4		?	0	600	Calibration	-
407	4.5224	17443.1		?	0	600	Calibration	-
408	4.5335	17602.1		?	0	600	Calibration	-
409	4.5446	17765.2		?	0	600	Calibration	-
410	4.5557	18048.8		?	0	600	Calibration	-
411	4.5668	19007.8		?	0	600	Calibration	-
412	4.5779	21688.3		?	0	600	Calibration	-
413	4.589	22706.6		?	0	600	Calibration	-
414	4.6	22869.3		?	0	600	Calibration	-
415	4.6111	22944.4		?	0	600	Calibration	-
416	4.6222	22810.2		?	0	600	Calibration	-
417	4.6333	22694.6		?	0	600	Calibration	-
418	4.6444	22432.7		?	0	600	Calibration	-
419	4.6555	22143.1		?	0	600	Calibration	-
420	4.6665	21726.3		?	0	600	Calibration	-
421	4.6776	21239.5		?	0	600	Calibration	-
422	4.6887	19416.2		?	0	600	Calibration	-
423	4.6998	15691.2		?	0	600	Calibration	-
424	4.7109	15493.1		?	0	600	Calibration	-
425	4.722	15543.4		?	0	600	Calibration	-
426	4.733	15773		?	0	600	Calibration	-
427	4.7441	15975.7		?	0	600	Calibration	-
428	4.7552	16224.4		?	0	600	Calibration	-
429	4.7663	16531.3		?	0	600	Calibration	-
430	4.7774	16736.9		?	0	600	Calibration	-
431	4.7885	17009.3		?	0	600	Calibration	-
432	4.7996	17285.7		?	0	600	Calibration	-
433	4.8106	17454.1		?	0	600	Calibration	-
434	4.8217	17517.6		?	0	600	Calibration	-
435	4.8328	17684.5		?	0	600	Calibration	-
436	4.8439	17874.1		?	0	600	Calibration	-
437	4.855	18214.8		?	0	600	Calibration	-
438	4.8661	19787.5		?	0	600	Calibration	-
439	4.8771	22030.6		?	0	600	Calibration	-
440	4.8882	22588.8		?	0	600	Calibration	-
441	4.8993	22738.3		?	0	600	Calibration	-
442	4.9104	22739.9		?	0	600	Calibration	-
443	4.9215	22609.2		?	0	600	Calibration	-
444	4.9326	22459.9		?	0	600	Calibration	-
445	4.9437	22222.4		?	0	600	Calibration	-
446	4.9547	21782.6		?	0	600	Calibration	-
447	4.9658	21501.4		?	0	600	Calibration	-
448	4.9769	20876.5		?	0	600	Calibration	-
449	4.988	17601.1		?	0	600	Calibration	-
450	4.9991	15572		?	0	600	Calibration	-
451	5.0102	15456.6		?	0	600	Calibration	-
452	5.0212	15585.8		?	0	600	Calibration	-
453	5.0323	15732.7		?	0	600	Calibration	-
454	5.0434	16074.1		?	0	600	Calibration	-
455	5.0545	16324.6		?	0	600	Calibration	-
456	5.0656	16568.6		?	0	600	Calibration	-
457	5.0767	16800.1		?	0	600	Calibration	-
458	5.0878	17049.3		?	0	600	Calibration	-
459	5.0988	17292.6		?	0	600	Calibration	-
460	5.1099	17378.4		?	0	600	Calibration	-
461	5.121	17373.2		?	0	600	Calibration	-
462	5.1321	17472.9		?	0	600	Calibration	-
463	5.1432	17573.1		?	0	600	Calibration	-
464	5.1543	17588.6		?	0	600	Calibration	-
465	5.1653	17729.5		?	0	600	Calibration	-
466	5.1764	17927.4		?	0	600	Calibration	-
467	5.1875	18405.7		?	0	600	Calibration	-
468	5.1986	20304.7		?	0	600	Calibration	-
469	5.2097	22074.2		?	0	600	Calibration	-
470	5.2208	22481.5		?	0	600	Calibration	-
471	5.2318	22581.1		?	0	600	Calibration	-
472	5.2429	22586.7		?	0	600	Calibration	-
473	5.254	22387.3		?	0	600	Calibration	-
474	5.2651	22206.2		?	0	600	Calibration	-
475	5.2762	22071.4		?	0	600	Calibration	-
476	5.2873	21710.4		?	0	600	Calibration	-
477	5.2984	21351.2		?	0	600	Calibration	-
478	5.3094	20720.1		?	0	600	Calibration	-
479	5.3205	17199.3		?	0	600	Calibration	-
480	5.3316	15442.6		?	0	600	Calibration	-
481	5.3427	15451		?	0	600	Calibration	-
482	5.3538	15537		?	0	600	Calibration	-
483	5.3649	15781.3		?	0	600	Calibration	-
484	5.3759	15957.4		?	0	600	Calibration	-
485	5.387	16257.8		?	0	600	Calibration	-
486	5.3981	16539.2		?	0	600	Calibration	-
487	5.4092	16741.8		?	0	600	Calibration	-
488	5.4203	16966.2		?	0	600	Calibration	-
489	5.4314	17182.2		?	0	600	Calibration	-
490	5.4425	17247.8		?	0	600	Calibration	-
491	5.4535	17247.2		?	0	600	Calibration	-
492	5.4646	17304		?	0	600	Calibration	-
493	5.4757	17250.3		?	0	600	Calibration	-
494	5.4868	17294.9		?	0	600	Calibration	-
495	5.4979	17283.5		?	0	600	Calibration	-
496	5.509	17220.4		?	0	600	Calibration	-
497	5.52	17173.8		?	0	600	Calibration	-
498	5.5311	17142.9		?	0	600	Calibration	-
499	5.5422	17107.9		?	0	600	Calibration	-
500	5.5533	17083.3		?	0	600	Calibration	-
501	5.5644	17029.8		?	0	600	Calibration	-
502	5.5755	16997.4		?	0	600	Calibration	-
503	5.5865	16959.2		?	0	600	Calibration	-
504	5.5976	16960.2		?	0	600	Calibration	-
505	5.6087	16976.3		?	0	600	Calibration	-
506	5.6198	16957.9		?	0	600	Calibration	-
507	5.6309	16909.5		?	0	600	Calibration	-
508	5.642	16969.1		?	0	600	Calibration	-
509	5.6531	16925.3		?	0	600	Calibration	-
510	5.6641	16911.2		?	0	600	Calibration	-
511	5.6752	16868.9		?	0	600	Calibration	-
512	5.6863	16875.1		?	0	600	Calibration	-
513	5.6974	16887.1		?	0	600	Calibration	-
514	5.7085	16886.8		?	0	600	Calibration	-
515	5.7196	16866.6		?	0	600	Calibration	-
516	5.7306	16879.5		?	0	600	Calibration	-
517	5.7417	16809.8		?	0	600	Calibration	-
518	5.7528	16880.2		?	0	600	Calibration	-
519	5.7639	16835.9		?	0	600	Calibration	-
520	5.775	16807.6		?	0	600	Calibration	-
521	5.7861	16759		?	0	600	Calibration	-
522	5.7972	16849.5		?	0	600	Calibration	-
523	5.8082	16854.2		?	0	600	Calibration	-
524	5.8193	16797.4		?	0	600	Calibration	-
525	5.8304	16811.2		?	0	600	Calibration	-
526	5.8415	16811.6		?	0	600	Calibration	-
527	5.8526	16804.8		?	0	600	Calibration	-
528	5.8637	16791.7		?	0	600	Calibration	-
529	5.8747	16803.3		?	0	600	Calibration	-
530	5.8858	16809.9		?	0	600	Calibration	-
531	5.8969	16834.9		?	0	600	Calibration	-
532	5.908	16754.9		?	0	600	Calibration	-
533	5.9191	16786.7		?	0	600	Calibration	-
534	5.9302	16825.7		?	0	600	Calibration	-
535	5.9413	16778.9		?	0	600	Calibration	-
536	5.9523	16802.4		?	0	600	Calibration	-
537	5.9634	16787.9		?	0	600	Calibration	-
538	5.9745	16804.3		?	0	600	Calibration	-
539	5.9856	16767.1		?	0	600	Calibration	-
540	5.9967	16770.2		?	0	600	Calibration	-
541	6.0078	16779.1		?	0	600	Calibration	-
542	6.0188	16784.1		?	0	600	Calibration	-
543	6.0299	16734.5		?	0	600	Calibration	-
544	6.041	16696.8		?	0	600	Calibration	-
545	6.0521	16753		?	0	600	Calibration	-
546	6.0632	16772.1		?	0	600	Calibration	-
547	6.0743	16731.9		?	0	600	Calibration	-
548	6.0853	16732.1		?	0	600	Calibration	-
549	6.0964	16756.2		?	0	600	Calibration	-
550	6.1075	16772		?	0	600	Calibration	-
551	6.1186	16739.8		?	0	600	Calibration	-
552	6.1297	16738.1		?	0	600	Calibration	-
553	6.1408	16711.9		?	0	600	Calibration	-
554	6.1519	16742.5		?	0	600	Calibration	-
555	6.1629	16734.6		?	0	600	Calibration	-
556	6.174	16778.5		?	0	600	Calibration	-
557	6.1851	16794.1		?	0	600	Calibration	-
558	6.1962	16694.2		?	0	600	Calibration	-
559	6.2073	16782.9		?	0	600	Calibration	-
560	6.2184	16727.9		?	0	600	Calibration	-
561	6.2294	16747		?	0	600	Calibration	-
562	6.2405	16762.1		?	0	600	Calibration	-
563	6.2516	16720.2		?	0	600	Calibration	-
564	6.2627	16684.9		?	0	600	Calibration	-
565	6.2738	16745.2		?	0	600	Calibration	-
566	6.2849	16758.8		?	0	600	Calibration	-
567	6.296	16764.8		?	0	600	Calibration	-
568	6.307	16734.7		?	0	600	Calibration	-
569	6.3181	16703		?	0	600	Calibration	-
570	6.3292	16700.2		?	0	600	Calibration	-
571	6.3403	16685.1		?	0	600	Calibration	-
572	6.3514	16707.6		?	0	600	Calibration	-
573	6.3625	16733.9		?	0	600	Calibration	-
574	6.3735	16710.1		?	0	600	Calibration	-
575	6.3846	16714.5		?	0	600	Calibration	-
576	6.3957	16744.9		?	0	600	Calibration	-
577	6.4068	16694.2		?	0	600	Calibration	-
578	6.4179	16699.4		?	0	600	Calibration	-
579	6.429	16730.7		?	0	600	Calibration	-
580	6.4401	16719		?	0	600	Calibration	-
581	6.4511	16704.9		?	0	600	Calibration	-
582	6.4622	16687.7		?	0	600	Calibration	-
583	6.4733	16664.9		?	0	600	Calibration	-
584	6.4844	16684.3		?	0	600	Calibration	-
585	6.4955	16679.5		?	0	600	Calibration	-
586	6.5066	16727.5		?	0	600	Calibration	-
587	6.5176	16728.2		?	0	600	Calibration	-
588	6.5287	16778.4		?	0	600	Calibration	-
589	6.5398	16736.9		?	0	600	Calibration	-
590	6.5509	16702.5		?	0	600	Calibration	-
591	6.562	16688.7		?	0	600	Calibration	-
592	6.5731	16684.5		?	0	600	Calibration	-
593	6.5841	16690.6		?	0	600	Calibration	-
594	6.5952	16707.7		?	0	600	Calibration	-
595	6.6063	16719.1		?	0	600	Calibration	-
596	6.6174	16745.2		?	0	600	Calibration	-
597	6.6285	16736		?	0	600	Calibration	-
598	6.6396	16738.4		?	0	600	Calibration	-
599	6.6507	16654.9		?	0	600	Calibration	-
600	6.6617	16803.1		?	0	600	Calibration	-
601	6.6728	16696.7		?	0	600	Calibration	-
602	6.6839	16695.6		?	0	600	Calibration	-
603	6.695	16694.6		?	0	600	Calibration	-
604	6.7061	16714.1		?	0	600	Calibration	-
605	6.7172	16691.1		?	0	600	Calibration	-
606	6.7282	16728		?	0	600	Calibration	-
607	6.7393	16695		?	0	600	Calibration	-
608	6.7504	16671.5		?	0	600	Calibration	-
609	6.7615	16647.4		?	0	600	Calibration	-
610	6.7726	16657.3		?	0	600	Calibration	-
611	6.7837	16643.5		?	0	600	Calibration	-
612	6.7948	16654.4		?	0	600	Calibration	-
613	6.8058	16609.5		?	0	600	Calibration	-
614	6.8169	16620.2		?	0	600	Calibration	-
615	6.828	16657.9		?	0	600	Calibration	-
616	6.8391	16670.9		?	0	600	Calibration	-
617	6.8502	16696.6		?	0	600	Calibration	-
618	6.8613	16677.4		?	0	600	Calibration	-
619	6.8723	16651.6		?	0	600	Calibration	-
620	6.8834	16631.8		?	0	600	Calibration	-
621	6.8945	16687.8		?	0	600	Calibration	-
622	6.9056	16631.9		?	0	600	Calibration	-
623	6.9167	16654		?	0	600	Calibration	-
624	6.9278	16664		?	0	600	Calibration	-
625	6.9388	16652.9		?	0	600	Calibration	-
626	6.9499	16674.2		?	0	600	Calibration	-
627	6.961	16677.3		?	0	600	Calibration	-
628	6.9721	16628.2		?	0	600	Calibration	-
629	6.9832	16622		?	0	600	Calibration	-
630	6.9943	16672.2		?	0	600	Calibration	-
631	7.0054	16630.9		?	0	600	Calibration	-
632	7.0164	16677.2		?	0	600	Calibration	-
633	7.0275	16668.3		?	0	600	Calibration	-
634	7.0386	16598.1		?	0	600	Calibration	-
635	7.0497	16627.5		?	0	600	Calibration	-
636	7.0608	16595		?	0	600	Calibration	-
637	7.0719	16639.5		?	0	600	Calibration	-
638	7.0829	16615.9		?	0	600	Calibration	-
639	7.094	16629.7		?	0	600	Calibration	-
640	7.1051	16637.8		?	0	600	Calibration	-
641	7.1162	16637.1		?	0	600	Calibration	-
642	7.1273	16686.6		?	0	600	Calibration	-
643	7.1384	16629.3		?	0	600	Calibration	-
644	7.1495	16674.9		?	0	600	Calibration	-
645	7.1605	16644.1		?	0	600	Calibration	-
646	7.1716	16596.4		?	0	600	Calibration	-
647	7.1827	16657.9		?	0	600	Calibration	-
648	7.1938	16661.6		?	0	600	Calibration	-
649	7.2049	16609.1		?	0	600	Calibration	-
650	7.216	16649.6		?	0	600	Calibration	-
651	7.227	16675.6		?	0	600	Calibration	-
652	7.2381	16659.4		?	0	600	Calibration	-
653	7.2492	16650.4		?	0	600	Calibration	-
654	7.2603	16662.9		?	0	600	Calibration	-
655	7.2714	16632.1		?	0	600	Calibration	-
656	7.2825	16639.1		?	0	600	Calibration	-
657	7.2936	16701.6		?	0	600	Calibration	-
658	7.3046	16657.2		?	0	600	Calibration	-
659	7.3157	16650.4		?	0	600	Calibration	-
660	7.3268	16633.7		?	0	600	Calibration	-
661	7.3379	16647.4		?	0	600	Calibration	-
662	7.349	16604.1		?	0	600	Calibration	-
663	7.3601	16627.2		?	0	600	Calibration	-
664	7.3711	16592.6		?	0	600	Calibration	-
665	7.3822	16677.5		?	0	600	Calibration	-
666	7.3933	16630.3		?	0	600	Calibration	-
667	7.4044	16639.5		?	0	600	Calibration	-
668	7.4155	16603.4		?	0	600	Calibration	-
669	7.4266	16594.8		?	0	600	Calibration	-
670	7.4376	16674.5		?	0	600	Calibration	-
671	7.4487	16663		?	0	600	Calibration	-
672	7.4598	16631.8		?	0	600	Calibration	-
673	7.4709	16612.6		?	0	600	Calibration	-
674	7.482	16577.2		?	0	600	Calibration	-
675	7.4931	16643.2		?	0	600	Calibration	-
676	7.5042	16646.4		?	0	600	Calibration	-
677	7.5152	16647.4		?	0	600	Calibration	-
678	7.5263	16679.4		?	0	600	Calibration	-
679	7.5374	16620.9		?	0	600	Calibration	-
680	7.5485	16708.6		?	0	600	Calibration	-
681	7.5596	16664.1		?	0	600	Calibration	-
682	7.5707	16640.5		?	0	600	Calibration	-
683	7.5817	16621.4		?	0	600	Calibration	-
684	7.5928	16673.9		?	0	600	Calibration	-
685	7.6039	16621		?	0	600	Calibration	-
686	7.615	16671.2		?	0	600	Calibration	-
687	7.6261	16693.1		?	0	600	Calibration	-
688	7.6372	16635.6		?	0	600	Calibration	-
689	7.6483	16620.1		?	0	600	Calibration	-
690	7.6593	16665.2		?	0	600	Calibration	-
691	7.6704	16675.8		?	0	600	Calibration	-
692	7.6815	16656		?	0	600	Calibration	-
693	7.6926	16664		?	0	600	Calibration	-
694	7.7037	16685.1		?	0	600	Calibration	-
695	7.7148	16679.1		?	0	600	Calibration	-
696	7.7258	16673.5		?	0	600	Calibration	-
697	7.7369	16631.4		?	0	600	Calibration	-
698	7.748	16688.6		?	0	600	Calibration	-
699	7.7591	16665.8		?	0	600	Calibration	-
700	7.7702	16680.4		?	0	600	Calibration	-
701	7.7813	16703.4		?	0	600	Calibration	-
702	7.7923	16621.9		?	0	600	Calibration	-
703	7.8034	16661.4		?	0	600	Calibration	-
704	7.8145	16701.2		?	0	600	Calibration	-
705	7.8256	16614		?	0	600	Calibration	-
706	7.8367	16654.9		?	0	600	Calibration	-
707	7.8478	16706.3		?	0	600	Calibration	-
708	7.8589	16690.7		?	0	600	Calibration	-
709	7.8699	16636.5		?	0	600	Calibration	-
710	7.881	16622.3		?	0	600	Calibration	-
711	7.8921	16614.8		?	0	600	Calibration	-
712	7.9032	16617.9		?	0	600	Calibration	-
713	7.9143	16640.6		?	0	600	Calibration	-
714	7.9254	16673.5		?	0	600	Calibration	-
715	7.9364	16654.7		?	0	600	Calibration	-
716	7.9475	16715		?	0	600	Calibration	-
717	7.9586	16631.1		?	0	600	Calibration	-
718	7.9697	16649.2		?	0	600	Calibration	-
719	7.9808	16661.6		?	0	600	Calibration	-
720	7.9919	16648		?	0	600	Calibration	-
721	8.003	16619.7		?	0	600	Calibration	-
722	8.014	16680.7		?	0	600	Calibration	-
723	8.0251	16669.2		?	0	600	Calibration	-
724	8.0362	16646.8		?	0	600	Calibration	-
725	8.0473	16675.8		?	0	600	Calibration	-
726	8.0584	16679.9		?	0	600	Calibration	-
727	8.0695	16680.2		?	0	600	Calibration	-
728	8.0805	16655.1		?	0	600	Calibration	-
729	8.0916	16701.5		?	0	600	Calibration	-
730	8.1027	16660.2		?	0	600	Calibration	-
731	8.1138	16648.9		?	0	600	Calibration	-
732	8.1249	16663.6		?	0	600	Calibration	-
733	8.136	16672.1		?	0	600	Calibration	-
734	8.1471	16641.3		?	0	600	Calibration	-
735	8.1581	16670		?	0	600	Calibration	-
736	8.1692	16610		?	0	600	Calibration	-
737	8.1803	16623.1		?	0	600	Calibration	-
738	8.1914	16675.1		?	0	600	Calibration	-
739	8.2025	16643.9		?	0	600	Calibration	-
740	8.2136	16659.1		?	0	600	Calibration	-
741	8.2246	16657		?	0	600	Calibration	-
742	8.2357	16631.5		?	0	600	Calibration	-
743	8.2468	16637.7		?	0	600	Calibration	-
744	8.2579	16610.3		?	0	600	Calibration	-
745	8.269	16673.8		?	0	600	Calibration	-
746	8.2801	16594.3		?	0	600	Calibration	-
747	8.2911	16658		?	0	600	Calibration	-
748	8.3022	16666.8		?	0	600	Calibration	-
749	8.3133	16632.5		?	0	600	Calibration	-
750	8.3244	16665.7		?	0	600	Calibration	-
751	8.3355	16670.1		?	0	600	Calibration	-
752	8.3466	16668.5		?	0	600	Calibration	-
753	8.3577	16676.1		?	0	600	Calibration	-
754	8.3687	16649.3		?	0	600	Calibration	-
755	8.3798	16681		?	0	600	Calibration	-
756	8.3909	16633.6		?	0	600	Calibration	-
757	8.402	16638		?	0	600	Calibration	-
758	8.4131	16618.2		?	0	600	Calibration	-
759	8.4242	16694.2		?	0	600	Calibration	-
760	8.4352	16661.7		?	0	600	Calibration	-
761	8.4463	16700		?	0	600	Calibration	-
762	8.4574	16697.6		?	0	600	Calibration	-
763	8.4685	16700		?	0	600	Calibration	-
764	8.4796	16650.4		?	0	600	Calibration	-
765	8.4907	16625.5		?	0	600	Calibration	-
766	8.5018	16729.1		?	0	600	Calibration	-
767	8.5128	16646.8		?	0	600	Calibration	-
768	8.5239	16634.3		?	0	600	Calibration	-
769	8.535	16632.3		?	0	600	Calibration	-
770	8.5461	16686.3		?	0	600	Calibration	-
771	8.5572	16677.9		?	0	600	Calibration	-
772	8.5683	16675.8		?	0	600	Calibration	-
773	8.5793	16651.9		?	0	600	Calibration	-
774	8.5904	16664.9		?	0	600	Calibration	-
775	8.6015	16623.2		?	0	600	Calibration	-
776	8.6126	16681		?	0	600	Calibration	-
777	8.6237	16674.6		?	0	600	Calibration	-
778	8.6348	16619		?	0	600	Calibration	-
779	8.6459	16609.9		?	0	600	Calibration	-
780	8.6569	16681.8		?	0	600	Calibration	-
781	8.668	16630.9		?	0	600	Calibration	-
782	8.6791	16677		?	0	600	Calibration	-
783	8.6902	16689.4		?	0	600	Calibration	-
784	8.7013	16624.7		?	0	600	Calibration	-
785	8.7124	16674.4		?	0	600	Calibration	-
786	8.7234	16658.1		?	0	600	Calibration	-
787	8.7345	16669.8		?	0	600	Calibration	-
788	8.7456	16635.1		?	0	600	Calibration	-
789	8.7567	16711		?	0	600	Calibration	-
790	8.7678	16722		?	0	600	Calibration	-
791	8.7789	16716.2		?	0	600	Calibration	-
792	8.7899	16723		?	0	600	Calibration	-
793	8.801	16738		?	0	600	Calibration	-
794	8.8121	16643.2		?	0	600	Calibration	-
795	8.8232	16702.1		?	0	600	Calibration	-
796	8.8343	16730.5		?	0	600	Calibration	-
797	8.8454	16695.1		?	0	600	Calibration	-
798	8.8565	16701		?	0	600	Calibration	-
799	8.8675	16722.8		?	0	600	Calibration	-
800	8.8786	16712.7		?	0	600	Calibration	-
801	8.8897	16744.4		?	0	600	Calibration	-
802	8.9008	16765.8		?	0	600	Calibration	-
803	8.9119	16699.1		?	0	600	Calibration	-
804	8.923	16720.1		?	0	600	Calibration	-
805	8.934	16740.6		?	0	600	Calibration	-
806	8.9451	16695.3		?	0	600	Calibration	-
807	8.9562	16697.1		?	0	600	Calibration	-
808	8.9673	16773		?	0	600	Calibration	-
809	8.9784	16699.8		?	0	600	Calibration	-
810	8.9895	16697.6		?	0	600	Calibration	-
811	9.0006	16755		?	0	600	Calibration	-
812	9.0116	16765		?	0	600	Calibration	-
813	9.0227	16708.3		?	0	600	Calibration	-
814	9.0338	16796.4		?	0	600	Calibration	-
815	9.0449	16721.8		?	0	600	Calibration	-
816	9.056	16712.6		?	0	600	Calibration	-
817	9.0671	16734		?	0	600	Calibration	-
818	9.0781	16742.3		?	0	600	Calibration	-
819	9.0892	16706.3		?	0	600	Calibration	-
820	9.1003	16782		?	0	600	Calibration	-
821	9.1114	16753.6		?	0	600	Calibration	-
822	9.1225	16755.9		?	0	600	Calibration	-
823	9.1336	16782.1		?	0	600	Calibration	-
824	9.1446	16826		?	0	600	Calibration	-
825	9.1557	16797.4		?	0	600	Calibration	-
826	9.1668	16809.2		?	0	600	Calibration	-
827	9.1779	16769.4		?	0	600	Calibration	-
828	9.189	16826.9		?	0	600	Calibration	-
829	9.2001	16808.2		?	0	600	Calibration	-
830	9.2112	16788.2		?	0	600	Calibration	-
831	9.2222	16785.9		?	0	600	Calibration	-
832	9.2333	16830.8		?	0	600	Calibration	-
833	9.2444	16781.4		?	0	600	Calibration	-
834	9.2555	16780.7		?	0	600	Calibration	-
835	9.2666	16802.4		?	0	600	Calibration	-
836	9.2777	16827.7		?	0	600	Calibration	-
837	9.2887	16826.8		?	0	600	Calibration	-
838	9.2998	16786.7		?	0	600	Calibration	-
839	9.3109	16827.2		?	0	600	Calibration	-
840	9.322	16795.7		?	0	600	Calibration	-
841	9.3331	16829.3		?	0	600	Calibration	-
842	9.3442	16831		?	0	600	Calibration	-
843	9.3553	16847.7		?	0	600	Calibration	-
844	9.3663	16826.1		?	0	600	Calibration	-
845	9.3774	16838.4		?	0	600	Calibration	-
846	9.3885	16834.5		?	0	600	Calibration	-
847	9.3996	16838.1		?	0	600	Calibration	-
848	9.4107	16848.4		?	0	600	Calibration	-
849	9.4218	16811.8		?	0	600	Calibration	-
850	9.4328	16815.2		?	0	600	Calibration	-
851	9.4439	16817		?	0	600	Calibration	-
852	9.455	16780.5		?	0	600	Calibration	-
853	9.4661	16813.6		?	0	600	Calibration	-
854	9.4772	16837.7		?	0	600	Calibration	-
855	9.4883	16812		?	0	600	Calibration	-
856	9.4994	16793.5		?	0	600	Calibration	-
857	9.5104	16836.9		?	0	600	Calibration	-
858	9.5215	16854.7		?	0	600	Calibration	-
859	9.5326	16856.6		?	0	600	Calibration	-
860	9.5437	16852.3		?	0	600	Calibration	-
861	9.5548	16793.1		?	0	600	Calibration	-
862	9.5659	16864.8		?	0	600	Calibration	-
863	9.5769	16831		?	0	600	Calibration	-
864	9.588	16777		?	0	600	Calibration	-
865	9.5991	16846.3		?	0	600	Calibration	-
866	9.6102	16863.3		?	0	600	Calibration	-
867	9.6213	16885		?	0	600	Calibration	-
868	9.6324	16834		?	0	600	Calibration	-
869	9.6434	16844.3		?	0	600	Calibration	-
870	9.6545	16891.6		?	0	600	Calibration	-
871	9.6656	16859.2		?	0	600	Calibration	-
872	9.6767	16788.1		?	0	600	Calibration	-
873	9.6878	16807.9		?	0	600	Calibration	-
874	9.6989	16845.1		?	0	600	Calibration	-
875	9.71	16838.7		?	0	600	Calibration	-
876	9.721	16856.2		?	0	600	Calibration	-
877	9.7321	16846.4		?	0	600	Calibration	-
878	9.7432	16831.9		?	0	600	Calibration	-
879	9.7543	16868.5		?	0	600	Calibration	-
880	9.7654	16832.6		?	0	600	Calibration	-
881	9.7765	16900.5		?	0	600	Calibration	-
882	9.7875	16872.6		?	0	600	Calibration	-
883	9.7986	16906.2		?	0	600	Calibration	-
884	9.8097	16916.3		?	0	600	Calibration	-
885	9.8208	16877.9		?	0	600	Calibration	-
886	9.8319	16942.4		?	0	600	Calibration	-
887	9.843	16844.5		?	0	600	Calibration	-
888	9.8541	16929		?	0	600	Calibration	-
889	9.8651	16920.9		?	0	600	Calibration	-
890	9.8762	16937.8		?	0	600	Calibration	-
891	9.8873	16939.4		?	0	600	Calibration	-
892	9.8984	17025.5		?	0	600	Calibration	-
893	9.9095	16921.6		?	0	600	Calibration	-
894	9.9206	16960.9		?	0	600	Calibration	-
895	9.9316	16991		?	0	600	Calibration	-
896	9.9427	17044.9		?	0	600	Calibration	-
897	9.9538	17034.2		?	0	600	Calibration	-
898	9.9649	17032.7		?	0	600	Calibration	-
899	9.976	17090.4		?	0	600	Calibration	-
900	9.9871	17069.4		?	0	600	Calibration	-
901	9.9982	17056.2		?	0	600	Calibration	-
902	10.0092	17089		?	0	600	Calibration	-
903	10.0203	17160.3		?	0	600	Calibration	-
904	10.0314	17147.3		?	0	600	Calibration	-
905	10.0425	17220.2		?	0	600	Calibration	-
906	10.0536	17267		?	0	600	Calibration	-
907	10.0647	17387.2		?	0	600	Calibration	-
908	10.0757	17394.7		?	0	600	Calibration	-
909	10.0868	17509.4		?	0	600	Calibration	-
910	10.0979	17686.2		?	0	600	Calibration	-
911	10.109	17854.3		?	0	600	Calibration	-
912	10.1201	18193.2		?	0	600	Calibration	-
913	10.1312	18659.4		?	0	600	Calibration	-
914	10.1422	19471		?	0	600	Calibration	-
915	10.1533	20098.1		?	0	600	Calibration	-
916	10.1644	20526.4		?	0	600	Calibration	-
917	10.1755	20734.2		?	0	600	Calibration	-
918	10.1866	20835.8		?	0	600	Calibration	-
919	10.1977	20822.7		?	0	600	Calibration	-
920	10.2088	20846.6		?	0	600	Calibration	-
921	10.2198	20820.1		?	0	600	Calibration	-
922	10.2309	20695.5		?	0	600	Calibration	-
923	10.242	20557.1		?	0	600	Calibration	-
924	10.2531	20440.4		?	0	600	Calibration	-
925	10.2642	20230		?	0	600	Calibration	-
926	10.2753	20097.4		?	0	600	Calibration	-
927	10.2863	19823.8		?	0	600	Calibration	-
928	10.2974	19550.7		?	0	600	Calibration	-
929	10.3085	18723.6		?	0	600	Calibration	-
930	10.3196	15213.4		?	0	600	Calibration	-
931	10.3307	14746		?	0	600	Calibration	-
932	10.3418	14766		?	0	600	Calibration	-
933	10.3529	14963.7		?	0	600	Calibration	-
934	10.3639	15285.9		?	0	600	Calibration	-
935	10.375	15573.2		?	0	600	Calibration	-
936	10.3861	15941.8		?	0	600	Calibration	-
937	10.3972	16365.3		?	0	600	Calibration	-
938	10.4083	16698.8		?	0	600	Calibration	-
939	10.4194	17031.8		?	0	600	Calibration	-
940	10.4304	17248.3		?	0	600	Calibration	-
941	10.4415	17741.2		?	0	600	Calibration	-
942	10.4526	19032.1		?	0	600	Calibration	-
943	10.4637	20797.8		?	0	600	Calibration	-
944	10.4748	21387.2		?	0	600	Calibration	-
945	10.4859	21464.8		?	0	600	Calibration	-
946	10.4969	21502.6		?	0	600	Calibration	-
947	10.508	21548.8		?	0	600	Calibration	-
948	10.5191	21355.8		?	0	600	Calibration	-
949	10.5302	21340.7		?	0	600	Calibration	-
950	10.5413	21165.7		?	0	600	Calibration	-
951	10.5524	20991		?	0	600	Calibration	-
952	10.5635	20793.1		?	0	600	Calibration	-
953	10.5745	20534.3		?	0	600	Calibration	-
954	10.5856	20264.5		?	0	600	Calibration	-
955	10.5967	19287.8		?	0	600	Calibration	-
956	10.6078	15232.6		?	0	600	Calibration	-
957	10.6189	14716.1		?	0	600	Calibration	-
958	10.63	14771.3		?	0	600	Calibration	-
959	10.641	14993.4		?	0	600	Calibration	-
960	10.6521	15211.2		?	0	600	Calibration	-
961	10.6632	15564		?	0	600	Calibration	-
962	10.6743	15871.9		?	0	600	Calibration	-
963	10.6854	16326.5		?	0	600	Calibration	-
964	10.6965	16679.7		?	0	600	Calibration	-
965	10.7076	17028.6		?	0	600	Calibration	-
966	10.7186	17472.6		?	0	600	Calibration	-
967	10.7297	18805.7		?	0	600	Calibration	-
968	10.7408	20873.2		?	0	600	Calibration	-
969	10.7519	21548		?	0	600	Calibration	-
970	10.763	21656		?	0	600	Calibration	-
971	10.7741	21647.6		?	0	600	Calibration	-
972	10.7851	21575.4		?	0	600	Calibration	-
973	10.7962	21367.3		?	0	600	Calibration	-
974	10.8073	21239.6		?	0	600	Calibration	-
975	10.8184	21056.9		?	0	600	Calibration	-
976	10.8295	20770.9		?	0	600	Calibration	-
977	10.8406	20412.7		?	0	600	Calibration	-
978	10.8517	20022.7		?	0	600	Calibration	-
979	10.8627	17907.2		?	0	600	Calibration	-
980	10.8738	14797.1		?	0	600	Calibration	-
981	10.8849	14656.5		?	0	600	Calibration	-
982	10.896	14754.4		?	0	600	Calibration	-
983	10.9071	15022.4		?	0	600	Calibration	-
984	10.9182	15283.9		?	0	600	Calibration	-
985	10.9292	15551.6		?	0	600	Calibration	-
986	10.9403	15827.1		?	0	600	Calibration	-
987	10.9514	16218.5		?	0	600	Calibration	-
988	10.9625	16595		?	0	600	Calibration	-
989	10.9736	16893.7		?	0	600	Calibration	-
990	10.9847	17380.9		?	0	600	Calibration	-
991	10.9957	18882.8		?	0	600	Calibration	-
992	11.0068	20915.2		?	0	600	Calibration	-
993	11.0179	21376.7		?	0	600	Calibration	-
994	11.029	21508.8		?	0	600	Calibration	-
995	11.0401	21633.9		?	0	600	Calibration	-
996	11.0512	21478.9		?	0	600	Calibration	-
997	11.0623	21223.4		?	0	600	Calibration	-
998	11.0733	20984.9		?	0	600	Calibration	-
999	11.0844	20812.9		?	0	600	Calibration	-
1000	11.0955	20502.3		?	0	600	Calibration	-
1001	11.1066	20014.9		?	0	600	Calibration	-
1002	11.1177	18554.8		?	0	600	Calibration	-
1003	11.1288	14858.1		?	0	600	Calibration	-
1004	11.1398	14607.4		?	0	600	Calibration	-
1005	11.1509	14691.1		?	0	600	Calibration	-
1006	11.162	14925.4		?	0	600	Calibration	-
1007	11.1731	15098.6		?	0	600	Calibration	-
1008	11.1842	15449.7		?	0	600	Calibration	-
1009	11.1953	15762.9		?	0	600	Calibration	-
1010	11.2064	16055.9		?	0	600	Calibration	-
1011	11.2174	16457.5		?	0	600	Calibration	-
1012	11.2285	16715.9		?	0	600	Calibration	-
1013	11.2396	17013		?	0	600	Calibration	-
1014	11.2507	17673.4		?	0	600	Calibration	-
1015	11.2618	19822.1		?	0	600	Calibration	-
1016	11.2729	21123.1		?	0	600	Calibration	-
1017	11.2839	21451.7		?	0	600	Calibration	-
1018	11.295	21465		?	0	600	Calibration	-
1019	11.3061	21402.4		?	0	600	Calibration	-
1020	11.3172	21287.7		?	0	600	Calibration	-
1021	11.3283	21111.4		?	0	600	Calibration	-
1022	11.3394	20910.7		?	0	600	Calibration	-
1023	11.3504	20666.3		?	0	600	Calibration	-
1024	11.3615	20447.3		?	0	600	Calibration	-
1025	11.3726	19936.3		?	0	600	Calibration	-
1026	11.3837	18217.9		?	0	600	Calibration	-
1027	11.3948	14809.9		?	0	600	Calibration	-
1028	11.4059	14644.1		?	0	600	Calibration	-
1029	11.417	14709.2		?	0	600	Calibration	-
1030	11.428	14871.5		?	0	600	Calibration	-
1031	11.4391	15108.4		?	0	600	Calibration	-
1032	11.4502	15413.4		?	0	600	Calibration	-
1033	11.4613	15716.8		?	0	600	Calibration	-
1034	11.4724	16053.2		?	0	600	Calibration	-
1035	11.4835	16434.4		?	0	600	Calibration	-
1036	11.4945	16703.1		?	0	600	Calibration	-
1037	11.5056	16954.6		?	0	600	Calibration	-
1038	11.5167	17310		?	0	600	Calibration	-
1039	11.5278	18854.7		?	0	600	Calibration	-
1040	11.5389	20874.9		?	0	600	Calibration	-
1041	11.55	21364		?	0	600	Calibration	-
1042	11.5611	21520.6		?	0	600	Calibration	-
1043	11.5721	21515.7		?	0	600	Calibration	-
1044	11.5832	21258.9		?	0	600	Calibration	-
1045	11.5943	21042.7		?	0	600	Calibration	-
1046	11.6054	20701.2		?	0	600	Calibration	-
1047	11.6165	20405.2		?	0	600	Calibration	-
1048	11.6276	20109.7		?	0	600	Calibration	-
1049	11.6386	19057.5		?	0	600	Calibration	-
1050	11.6497	14980.1		?	0	600	Calibration	-
1051	11.6608	14637.5		?	0	600	Calibration	-
1052	11.6719	14681.6		?	0	600	Calibration	-
1053	11.683	14897.3		?	0	600	Calibration	-
1054	11.6941	15088.7		?	0	600	Calibration	-
1055	11.7052	15329.2		?	0	600	Calibration	-
1056	11.7162	15702.2		?	0	600	Calibration	-
1057	11.7273	15962.3		?	0	600	Calibration	-
1058	11.7384	16333.9		?	0	600	Calibration	-
1059	11.7495	16551		?	0	600	Calibration	-
1060	11.7606	16734.6		?	0	600	Calibration	-
1061	11.7717	16908.9		?	0	600	Calibration	-
1062	11.7827	17207.5		?	0	600	Calibration	-
1063	11.7938	18240.2		?	0	600	Calibration	-
1064	11.8049	20550.9		?	0	600	Calibration	-
1065	11.816	21240.1		?	0	600	Calibration	-
1066	11.8271	21419.7		?	0	600	Calibration	-
1067	11.8382	21487		?	0	600	Calibration	-
1068	11.8492	21318.5		?	0	600	Calibration	-
1069	11.8603	21129.4		?	0	600	Calibration	-
1070	11.8714	21003.1		?	0	600	Calibration	-
1071	11.8825	20645.2		?	0	600	Calibration	-
1072	11.8936	20406.9		?	0	600	Calibration	-
1073	11.9047	19949		?	0	600	Calibration	-
1074	11.9158	18804		?	0	600	Calibration	-
1075	11.9268	14958.3		?	0	600	Calibration	-
1076	11.9379	14662.1		?	0	600	Calibration	-
1077	11.949	14721.3		?	0	600	Calibration	-
1078	11.9601	14860.6		?	0	600	Calibration	-
1079	11.9712	15086.6		?	0	600	Calibration	-
1080	11.9823	15437.2		?	0	600	Calibration	-
1081	11.9933	15710.5		?	0	600	Calibration	-
1082	12.0044	15956.9		?	0	600	Calibration	-
1083	12.0155	16219.7		?	0	600	Calibration	-
1084	12.0266	16546.9		?	0	600	Calibration	-
1085	12.0377	16647.7		?	0	600	Calibration	-
1086	12.0488	16788.1		?	0	600	Calibration	-
1087	12.0599	16951		?	0	600	Calibration	-
1088	12.0709	17216.3		?	0	600	Calibration	-
1089	12.082	18195.1		?	0	600	Calibration	-
1090	12.0931	20400.7		?	0	600	Calibration	-
1091	12.1042	21128.3		?	0	600	Calibration	-
1092	12.1153	21321.8		?	0	600	Calibration	-
1093	12.1264	21361		?	0	600	Calibration	-
1094	12.1374	21272.7		?	0	600	Calibration	-
1095	12.1485	21204.8		?	0	600	Calibration	-
1096	12.1596	21057.5		?	0	600	Calibration	-
1097	12.1707	20807.1		?	0	600	Calibration	-
1098	12.1818	20547.7		?	0	600	Calibration	-
1099	12.1929	20104.2		?	0	600	Calibration	-
1100	12.204	19476		?	0	600	Calibration	-
1101	12.215	15729.4		?	0	600	Calibration	-
1102	12.2261	14653.2		?	0	600	Calibration	-
1103	12.2372	14647.6		?	0	600	Calibration	-
1104	12.2483	14779		?	0	600	Calibration	-
1105	12.2594	15047.1		?	0	600	Calibration	-
1106	12.2705	15288.4		?	0	600	Calibration	-
1107	12.2815	15529.6		?	0	600	Calibration	-
1108	12.2926	15792.2		?	0	600	Calibration	-
1109	12.3037	16096.8		?	0	600	Calibration	-
1110	12.3148	16365.2		?	0	600	Calibration	-
1111	12.3259	16447.3		?	0	600	Calibration	-
1112	12.337	16574.1		?	0	600	Calibration	-
1113	12.348	16616		?	0	600	Calibration	-
1114	12.3591	16663		?	0	600	Calibration	-
1115	12.3702	16688.6		?	0	600	Calibration	-
1116	12.3813	16829.1		?	0	600	Calibration	-
1117	12.3924	16969.9		?	0	600	Calibration	-
1118	12.4035	17213.9		?	0	600	Calibration	-
1119	12.4146	18272.3		?	0	600	Calibration	-
1120	12.4256	20215.1		?	0	600	Calibration	-
1121	12.4367	21016.5		?	0	600	Calibration	-
1122	12.4478	21197.3		?	0	600	Calibration	-
1123	12.4589	21216.9		?	0	600	Calibration	-
1124	12.47	21133.1		?	0	600	Calibration	-
1125	12.4811	21004.7		?	0	600	Calibration	-
1126	12.4921	20906.9		?	0	600	Calibration	-
1127	12.5032	20629.5		?	0	600	Calibration	-
1128	12.5143	20338.3		?	0	600	Calibration	-
1129	12.5254	19911.1		?	0	600	Calibration	-
1130	12.5365	18916.8		?	0	600	Calibration	-
1131	12.5476	14981.6		?	0	600	Calibration	-
1132	12.5587	14614.1		?	0	600	Calibration	-
1133	12.5697	14616		?	0	600	Calibration	-
1134	12.5808	14852.4		?	0	600	Calibration	-
1135	12.5919	15055.9		?	0	600	Calibration	-
1136	12.603	15329.6		?	0	600	Calibration	-
1137	12.6141	15534.2		?	0	600	Calibration	-
1138	12.6252	15777.5		?	0	600	Calibration	-
1139	12.6362	16079.2		?	0	600	Calibration	-
1140	12.6473	16343.7		?	0	600	Calibration	-
1141	12.6584	16465.5		?	0	600	Calibration	-
1142	12.6695	16506.2		?	0	600	Calibration	-
1143	12.6806	16538.5		?	0	600	Calibration	-
1144	12.6917	16569.2		?	0	600	Calibration	-
1145	12.7027	16602.6		?	0	600	Calibration	-
1146	12.7138	16585.8		?	0	600	Calibration	-
1147	12.7249	16644.4		?	0	600	Calibration	-
1148	12.736	16642.2		?	0	600	Calibration	-
1149	12.7471	16690.6		?	0	600	Calibration	-
1150	12.7582	16764.5		?	0	600	Calibration	-
1151	12.7693	16957.1		?	0	600	Calibration	-
1152	12.7803	17235.8		?	0	600	Calibration	-
1153	12.7914	18110.4		?	0	600	Calibration	-
1154	12.8025	19980.6		?	0	600	Calibration	-
1155	12.8136	20769.2		?	0	600	Calibration	-
1156	12.8247	20989.3		?	0	600	Calibration	-
1157	12.8358	20977.5		?	0	600	Calibration	-
1158	12.8468	20952.8		?	0	600	Calibration	-
1159	12.8579	20735		?	0	600	Calibration	-
1160	12.869	20608.1		?	0	600	Calibration	-
1161	12.8801	20413.3		?	0	600	Calibration	-
1162	12.8912	20180		?	0	600	Calibration	-
1163	12.9023	19850.3		?	0	600	Calibration	-
1164	12.9134	19257.5		?	0	600	Calibration	-
1165	12.9244	16142.4		?	0	600	Calibration	-
1166	12.9355	14645.9		?	0	600	Calibration	-
1167	12.9466	14574.9		?	0	600	Calibration	-
1168	12.9577	14708.5		?	0	600	Calibration	-
1169	12.9688	14896.5		?	0	600	Calibration	-
1170	12.9799	15173		?	0	600	Calibration	-
1171	12.9909	15473.4		?	0	600	Calibration	-
1172	13.002	15660.6		?	0	600	Calibration	-
1173	13.0131	15928		?	0	600	Calibration	-
1174	13.0242	16152.1		?	0	600	Calibration	-
1175	13.0353	16285.4		?	0	600	Calibration	-
1176	13.0464	16368.8		?	0	600	Calibration	-
1177	13.0575	16350.8		?	0	600	Calibration	-
1178	13.0685	16376.7		?	0	600	Calibration	-
1179	13.0796	16343.8		?	0	600	Calibration	-
1180	13.0907	16351.1		?	0	600	Calibration	-
1181	13.1018	16293.9		?	0	600	Calibration	-
1182	13.1129	16272.2		?	0	600	Calibration	-
1183	13.124	16225.1		?	0	600	Calibration	-
1184	13.135	16174.6		?	0	600	Calibration	-
1185	13.1461	16154.6		?	0	600	Calibration	-
1186	13.1572	16136.9		?	0	600	Calibration	-
1187	13.1683	16035.9		?	0	600	Calibration	-
1188	13.1794	16022.4		?	0	600	Calibration	-
1189	13.1905	16026.5		?	0	600	Calibration	-
1190	13.2015	15972.4		?	0	600	Calibration	-
1191	13.2126	16001.2		?	0	600	Calibration	-
1192	13.2237	16006.2		?	0	600	Calibration	-
1193	13.2348	15991.3		?	0	600	Calibration	-
1194	13.2459	15909.3		?	0	600	Calibration	-
1195	13.257	15961.6		?	0	600	Calibration	-
1196	13.2681	15953.4		?	0	600	Calibration	-
1197	13.2791	15973.2		?	0	600	Calibration	-
1198	13.2902	15993.8		?	0	600	Calibration	-
1199	13.3013	15962.4		?	0	600	Calibration	-
1200	13.3124	15880.9		?	0	600	Calibration	-
1201	13.3235	15937.3		?	0	600	Calibration	-
1202	13.3346	15892.4		?	0	600	Calibration	-
1203	13.3456	15865.4		?	0	600	Calibration	-
1204	13.3567	15914.8		?	0	600	Calibration	-
1205	13.3678	15897.4		?	0	600	Calibration	-
1206	13.3789	15848.5		?	0	600	Calibration	-
1207	13.39	15881.2		?	0	600	Calibration	-
1208	13.4011	15867		?	0	600	Calibration	-
1209	13.4122	15903.3		?	0	600	Calibration	-
1210	13.4232	15878.7		?	0	600	Calibration	-
1211	13.4343	15832.8		?	0	600	Calibration	-
1212	13.4454	15804		?	0	600	Calibration	-
1213	13.4565	15841.9		?	0	600	Calibration	-
1214	13.4676	15825.1		?	0	600	Calibration	-
1215	13.4787	15862		?	0	600	Calibration	-
1216	13.4897	15832.3		?	0	600	Calibration	-
1217	13.5008	15791.4		?	0	600	Calibration	-
1218	13.5119	15806.5		?	0	600	Calibration	-
1219	13.523	15832.7		?	0	600	Calibration	-
1220	13.5341	15819.4		?	0	600	Calibration	-
1221	13.5452	15797.2		?	0	600	Calibration	-
1222	13.5563	15775.2		?	0	600	Calibration	-
1223	13.5673	15808.1		?	0	600	Calibration	-
1224	13.5784	15768.9		?	0	600	Calibration	-
1225	13.5895	15755.5		?	0	600	Calibration	-
1226	13.6006	15695.8		?	0	600	Calibration	-
1227	13.6117	15701		?	0	600	Calibration	-
1228	13.6228	15758.7		?	0	600	Calibration	-
1229	13.6338	15792.1		?	0	600	Calibration	-
1230	13.6449	15755.5		?	0	600	Calibration	-
1231	13.656	15750.2		?	0	600	Calibration	-
1232	13.6671	15712.1		?	0	600	Calibration	-
1233	13.6782	15731.5		?	0	600	Calibration	-
1234	13.6893	15732		?	0	600	Calibration	-
1235	13.7003	15674		?	0	600	Calibration	-
1236	13.7114	15705.5		?	0	600	Calibration	-
1237	13.7225	15705.3		?	0	600	Calibration	-
1238	13.7336	15715.8		?	0	600	Calibration	-
1239	13.7447	15692.2		?	0	600	Calibration	-
1240	13.7558	15737.7		?	0	600	Calibration	-
1241	13.7669	15723		?	0	600	Calibration	-
1242	13.7779	15686.2		?	0	600	Calibration	-
1243	13.789	15757.5		?	0	600	Calibration	-
1244	13.8001	15754.3		?	0	600	Calibration	-
1245	13.8112	15736.5		?	0	600	Calibration	-
1246	13.8223	15736.6		?	0	600	Calibration	-
1247	13.8334	15763.2		?	0	600	Calibration	-
1248	13.8444	15712.5		?	0	600	Calibration	-
1249	13.8555	15753.2		?	0	600	Calibration	-
1250	13.8666	15705.3		?	0	600	Calibration	-
1251	13.8777	15725		?	0	600	Calibration	-
1252	13.8888	15715		?	0	600	Calibration	-
1253	13.8999	15711.9		?	0	600	Calibration	-
1254	13.911	15733.1		?	0	600	Calibration	-
1255	13.922	15671.3		?	0	600	Calibration	-
1256	13.9331	15745.7		?	0	600	Calibration	-
1257	13.9442	15687		?	0	600	Calibration	-
1258	13.9553	15708		?	0	600	Calibration	-
1259	13.9664	15748.3		?	0	600	Calibration	-
1260	13.9775	15711.2		?	0	600	Calibration	-
1261	13.9885	15731.9		?	0	600	Calibration	-
1262	13.9996	15737.6		?	0	600	Calibration	-
1263	14.0107	15705.4		?	0	600	Calibration	-
1264	14.0218	15737.7		?	0	600	Calibration	-
1265	14.0329	15758.5		?	0	600	Calibration	-
1266	14.044	15753.1		?	0	600	Calibration	-
1267	14.055	15754.1		?	0	600	Calibration	-
1268	14.0661	15781.6		?	0	600	Calibration	-
1269	14.0772	15783.1		?	0	600	Calibration	-
1270	14.0883	15800.7		?	0	600	Calibration	-
1271	14.0994	15675.3		?	0	600	Calibration	-
1272	14.1105	15774.2		?	0	600	Calibration	-
1273	14.1216	15739.1		?	0	600	Calibration	-
1274	14.1326	15765.6		?	0	600	Calibration	-
1275	14.1437	15728.9		?	0	600	Calibration	-
1276	14.1548	15680.5		?	0	600	Calibration	-
1277	14.1659	15712.6		?	0	600	Calibration	-
1278	14.177	15724.8		?	0	600	Calibration	-
1279	14.1881	15745.3		?	0	600	Calibration	-
1280	14.1991	15778.2		?	0	600	Calibration	-
1281	14.2102	15740.6		?	0	600	Calibration	-
1282	14.2213	15746.4		?	0	600	Calibration	-
1283	14.2324	15791.1		?	0	600	Calibration	-
1284	14.2435	15773.6		?	0	600	Calibration	-
1285	14.2546	15704		?	0	600	Calibration	-
1286	14.2657	15786.2		?	0	600	Calibration	-
1287	14.2767	15704.1		?	0	600	Calibration	-
1288	14.2878	15775.3		?	0	600	Calibration	-
1289	14.2989	15747.3		?	0	600	Calibration	-
1290	14.31	15776.4		?	0	600	Calibration	-
1291	14.3211	15715.9		?	0	600	Calibration	-
1292	14.3322	15772.4		?	0	600	Calibration	-
1293	14.3432	15769.8		?	0	600	Calibration	-
1294	14.3543	15713.1		?	0	600	Calibration	-
1295	14.3654	15709.2		?	0	600	Calibration	-
1296	14.3765	15791.3		?	0	600	Calibration	-
1297	14.3876	15785		?	0	600	Calibration	-
1298	14.3987	15712.4		?	0	600	Calibration	-
1299	14.4098	15733.4		?	0	600	Calibration	-
1300	14.4208	15778.1		?	0	600	Calibration	-
1301	14.4319	15803		?	0	600	Calibration	-
1302	14.443	15766.7		?	0	600	Calibration	-
1303	14.4541	15820.6		?	0	600	Calibration	-
1304	14.4652	15724.7		?	0	600	Calibration	-
1305	14.4763	15773.2		?	0	600	Calibration	-
1306	14.4873	15797.8		?	0	600	Calibration	-
1307	14.4984	15747		?	0	600	Calibration	-
1308	14.5095	15787		?	0	600	Calibration	-
1309	14.5206	15767.6		?	0	600	Calibration	-
1310	14.5317	15721.2		?	0	600	Calibration	-
1311	14.5428	15748		?	0	600	Calibration	-
1312	14.5538	15744.3		?	0	600	Calibration	-
1313	14.5649	15733.5		?	0	600	Calibration	-
1314	14.576	15728.5		?	0	600	Calibration	-
1315	14.5871	15752.2		?	0	600	Calibration	-
1316	14.5982	15794.6		?	0	600	Calibration	-
1317	14.6093	15734.9		?	0	600	Calibration	-
1318	14.6204	15688.9		?	0	600	Calibration	-
1319	14.6314	15747.6		?	0	600	Calibration	-
1320	14.6425	15786.9		?	0	600	Calibration	-
1321	14.6536	15718.2		?	0	600	Calibration	-
1322	14.6647	15800.5		?	0	600	Calibration	-
1323	14.6758	15751.5		?	0	600	Calibration	-
1324	14.6869	15758.2		?	0	600	Calibration	-
1325	14.6979	15761		?	0	600	Calibration	-
1326	14.709	15759.9		?	0	600	Calibration	-
1327	14.7201	15733.1		?	0	600	Calibration	-
1328	14.7312	15753.1		?	0	600	Calibration	-
1329	14.7423	15747.9		?	0	600	Calibration	-
1330	14.7534	15759.6		?	0	600	Calibration	-
1331	14.7645	15767.4		?	0	600	Calibration	-
1332	14.7755	15758.5		?	0	600	Calibration	-
1333	14.7866	15775.2		?	0	600	Calibration	-
1334	14.7977	15792.2		?	0	600	Calibration	-
1335	14.8088	15785.2		?	0	600	Calibration	-
1336	14.8199	15751.1		?	0	600	Calibration	-
1337	14.831	15731.6		?	0	600	Calibration	-
1338	14.842	15787		?	0	600	Calibration	-
1339	14.8531	15754.3		?	0	600	Calibration	-
1340	14.8642	15753.2		?	0	600	Calibration	-
1341	14.8753	15761.8		?	0	600	Calibration	-
1342	14.8864	15790.7		?	0	600	Calibration	-
1343	14.8975	15759.8		?	0	600	Calibration	-
1344	14.9085	15743.8		?	0	600	Calibration	-
1345	14.9196	15776.6		?	0	600	Calibration	-
1346	14.9307	15777.2		?	0	600	Calibration	-
1347	14.9418	15764		?	0	600	Calibration	-
1348	14.9529	15757.3		?	0	600	Calibration	-
1349	14.964	15769.4		?	0	600	Calibration	-
1350	14.9751	15828.2		?	0	600	Calibration	-
1351	14.9861	15800.6		?	0	600	Calibration	-
1352	14.9972	15776.3		?	0	600	Calibration	-
1353	15.0083	15726.2		?	0	600	Calibration	-
1354	15.0194	15738.5		?	0	600	Calibration	-
1355	15.0305	15777.5		?	0	600	Calibration	-
1356	15.0416	15751.1		?	0	600	Calibration	-
1357	15.0526	15764.2		?	0	600	Calibration	-
1358	15.0637	15808.2		?	0	600	Calibration	-
1359	15.0748	15761.2		?	0	600	Calibration	-
1360	15.0859	15747.4		?	0	600	Calibration	-
1361	15.097	15775.8		?	0	600	Calibration	-
1362	15.1081	15782		?	0	600	Calibration	-
1363	15.1192	15788.2		?	0	600	Calibration	-
1364	15.1302	15780.8		?	0	600	Calibration	-
1365	15.1413	15741.8		?	0	600	Calibration	-
1366	15.1524	15799.3		?	0	600	Calibration	-
1367	15.1635	15762.6		?	0	600	Calibration	-
1368	15.1746	15741.8		?	0	600	Calibration	-
1369	15.1857	15816.4		?	0	600	Calibration	-
1370	15.1967	15812		?	0	600	Calibration	-
1371	15.2078	15781.2		?	0	600	Calibration	-
1372	15.2189	15758.3		?	0	600	Calibration	-
1373	15.23	15801.1		?	0	600	Calibration	-
1374	15.2411	15776		?	0	600	Calibration	-
1375	15.2522	15783.5		?	0	600	Calibration	-
1376	15.2633	15835		?	0	600	Calibration	-
1377	15.2743	15777.6		?	0	600	Calibration	-
1378	15.2854	15724.1		?	0	600	Calibration	-
1379	15.2965	15748.4		?	0	600	Calibration	-
1380	15.3076	15764.7		?	0	600	Calibration	-
1381	15.3187	15726.4		?	0	600	Calibration	-
1382	15.3298	15771.8		?	0	600	Calibration	-
1383	15.3408	15798.4		?	0	600	Calibration	-
1384	15.3519	15763.9		?	0	600	Calibration	-
1385	15.363	15751.1		?	0	600	Calibration	-
1386	15.3741	15802		?	0	600	Calibration	-
1387	15.3852	15772		?	0	600	Calibration	-
1388	15.3963	15788.7		?	0	600	Calibration	-
1389	15.4073	15859.5		?	0	600	Calibration	-
1390	15.4184	15769.6		?	0	600	Calibration	-
1391	15.4295	15815.1		?	0	600	Calibration	-
1392	15.4406	15820.4		?	0	600	Calibration	-
1393	15.4517	15805.9		?	0	600	Calibration	-
1394	15.4628	15766.1		?	0	600	Calibration	-
1395	15.4739	15801.4		?	0	600	Calibration	-
1396	15.4849	15823.8		?	0	600	Calibration	-
1397	15.496	15797.9		?	0	600	Calibration	-
1398	15.5071	15785.4		?	0	600	Calibration	-
1399	15.5182	15746.4		?	0	600	Calibration	-
1400	15.5293	15727.6		?	0	600	Calibration	-
1401	15.5404	15768.7		?	0	600	Calibration	-
1402	15.5514	15781		?	0	600	Calibration	-
1403	15.5625	15779.3		?	0	600	Calibration	-
1404	15.5736	15799.5		?	0	600	Calibration	-
1405	15.5847	15784.6		?	0	600	Calibration	-
1406	15.5958	15843.4		?	0	600	Calibration	-
1407	15.6069	15833.1		?	0	600	Calibration	-
1408	15.618	15791.5		?	0	600	Calibration	-
1409	15.629	15795.6		?	0	600	Calibration	-
1410	15.6401	15846.9		?	0	600	Calibration	-
1411	15.6512	15800.3		?	0	600	Calibration	-
1412	15.6623	15800.8		?	0	600	Calibration	-
1413	15.6734	15766.7		?	0	600	Calibration	-
1414	15.6845	15770.5		?	0	600	Calibration	-
1415	15.6955	15843.8		?	0	600	Calibration	-
1416	15.7066	15797.9		?	0	600	Calibration	-
1417	15.7177	15776.8		?	0	600	Calibration	-
1418	15.7288	15808.1		?	0	600	Calibration	-
1419	15.7399	15785.7		?	0	600	Calibration	-
1420	15.751	15804.3		?	0	600	Calibration	-
1421	15.7621	15804		?	0	600	Calibration	-
1422	15.7731	15852.7		?	0	600	Calibration	-
1423	15.7842	15801		?	0	600	Calibration	-
1424	15.7953	15871.2		?	0	600	Calibration	-
1425	15.8064	15844.9		?	0	600	Calibration	-
1426	15.8175	15806.2		?	0	600	Calibration	-
1427	15.8286	15870.3		?	0	600	Calibration	-
1428	15.8396	15846.6		?	0	600	Calibration	-
1429	15.8507	15841		?	0	600	Calibration	-
1430	15.8618	15843.8		?	0	600	Calibration	-
1431	15.8729	15898.4		?	0	600	Calibration	-
1432	15.884	15838.5		?	0	600	Calibration	-
1433	15.8951	15829.5		?	0	600	Calibration	-
1434	15.9061	15828.3		?	0	600	Calibration	-
1435	15.9172	15813.9		?	0	600	Calibration	-
1436	15.9283	15832.9		?	0	600	Calibration	-
1437	15.9394	15875.4		?	0	600	Calibration	-
1438	15.9505	15834.1		?	0	600	Calibration	-
1439	15.9616	15873.6		?	0	600	Calibration	-
1440	15.9727	15881.1		?	0	600	Calibration	-
1441	15.9837	15808.3		?	0	600	Calibration	-
1442	15.9948	15871.8		?	0	600	Calibration	-
1443	16.0059	15883		?	0	600	Calibration	-
1444	16.017	15838		?	0	600	Calibration	-
1445	16.0281	15842		?	0	600	Calibration	-
1446	16.0392	15842.1		?	0	600	Calibration	-
1447	16.0502	15836.6		?	0	600	Calibration	-
1448	16.0613	15830.6		?	0	600	Calibration	-
1449	16.0724	15864.2		?	0	600	Calibration	-
1450	16.0835	15861.2		?	0	600	Calibration	-
1451	16.0946	15884		?	0	600	Calibration	-
1452	16.1057	15868.3		?	0	600	Calibration	-
1453	16.1168	15859.6		?	0	600	Calibration	-
1454	16.1278	15849.1		?	0	600	Calibration	-
1455	16.1389	15910.6		?	0	600	Calibration	-
1456	16.15	15878.8		?	0	600	Calibration	-
1457	16.1611	15882.4		?	0	600	Calibration	-
1458	16.1722	15892.7		?	0	600	Calibration	-
1459	16.1833	15831		?	0	600	Calibration	-
1460	16.1943	15894.6		?	0	600	Calibration	-
1461	16.2054	15902.6		?	0	600	Calibration	-
1462	16.2165	15884.1		?	0	600	Calibration	-
1463	16.2276	15892.6		?	0	600	Calibration	-
1464	16.2387	15922.7		?	0	600	Calibration	-
1465	16.2498	15888.3		?	0	600	Calibration	-
1466	16.2608	15919.1		?	0	600	Calibration	-
1467	16.2719	15880.4		?	0	600	Calibration	-
1468	16.283	15913.3		?	0	600	Calibration	-
1469	16.2941	15897.8		?	0	600	Calibration	-
1470	16.3052	15892.3		?	0	600	Calibration	-
1471	16.3163	15883.4		?	0	600	Calibration	-
1472	16.3274	15907.9		?	0	600	Calibration	-
1473	16.3384	15850.6		?	0	600	Calibration	-
1474	16.3495	15879.1		?	0	600	Calibration	-
1475	16.3606	15871.9		?	0	600	Calibration	-
1476	16.3717	15886.4		?	0	600	Calibration	-
1477	16.3828	15982.7		?	0	600	Calibration	-
1478	16.3939	15883		?	0	600	Calibration	-
1479	16.4049	15988.5		?	0	600	Calibration	-
1480	16.416	15907.3		?	0	600	Calibration	-
1481	16.4271	15887.5		?	0	600	Calibration	-
1482	16.4382	15883.5		?	0	600	Calibration	-
1483	16.4493	15914.5		?	0	600	Calibration	-
1484	16.4604	15915.8		?	0	600	Calibration	-
1485	16.4715	15910.5		?	0	600	Calibration	-
1486	16.4825	15885.4		?	0	600	Calibration	-
1487	16.4936	15866.9		?	0	600	Calibration	-
1488	16.5047	15895.9		?	0	600	Calibration	-
1489	16.5158	15922.5		?	0	600	Calibration	-
1490	16.5269	15873.9		?	0	600	Calibration	-
1491	16.538	15914.3		?	0	600	Calibration	-
1492	16.549	15915.4		?	0	600	Calibration	-
1493	16.5601	15902.4		?	0	600	Calibration	-
1494	16.5712	15911.2		?	0	600	Calibration	-
1495	16.5823	15916.9		?	0	600	Calibration	-
1496	16.5934	15923.7		?	0	600	Calibration	-
1497	16.6045	15919.2		?	0	600	Calibration	-
1498	16.6156	15951.8		?	0	600	Calibration	-
1499	16.6266	15946.8		?	0	600	Calibration	-
1500	16.6377	15938.1		?	0	600	Calibration	-
1501	16.6488	15917.1		?	0	600	Calibration	-
1502	16.6599	15945		?	0	600	Calibration	-
1503	16.671	15919.4		?	0	600	Calibration	-
1504	16.6821	15966.4		?	0	600	Calibration	-
1505	16.6931	15890.6		?	0	600	Calibration	-
1506	16.7042	15947.5		?	0	600	Calibration	-
1507	16.7153	15974.2		?	0	600	Calibration	-
1508	16.7264	15922.4		?	0	600	Calibration	-
1509	16.7375	15928.9		?	0	600	Calibration	-
1510	16.7486	15934.7		?	0	600	Calibration	-
1511	16.7596	15932.3		?	0	600	Calibration	-
1512	16.7707	15903.2		?	0	600	Calibration	-
1513	16.7818	15961.8		?	0	600	Calibration	-
1514	16.7929	15912.7		?	0	600	Calibration	-
1515	16.804	15933.8		?	0	600	Calibration	-
1516	16.8151	15934.8		?	0	600	Calibration	-
1517	16.8262	15898.7		?	0	600	Calibration	-
1518	16.8372	15955.2		?	0	600	Calibration	-
1519	16.8483	15943.5		?	0	600	Calibration	-
1520	16.8594	15896.4		?	0	600	Calibration	-
1521	16.8705	15859.1		?	0	600	Calibration	-
1522	16.8816	15917.6		?	0	600	Calibration	-
1523	16.8927	15941.3		?	0	600	Calibration	-
1524	16.9037	15881		?	0	600	Calibration	-
1525	16.9148	15898.4		?	0	600	Calibration	-
1526	16.9259	15924.4		?	0	600	Calibration	-
1527	16.937	15918.2		?	0	600	Calibration	-
1528	16.9481	15964.9		?	0	600	Calibration	-
1529	16.9592	15903.1		?	0	600	Calibration	-
1530	16.9703	15884.8		?	0	600	Calibration	-
1531	16.9813	15908.5		?	0	600	Calibration	-
1532	16.9924	15871.7		?	0	600	Calibration	-
1533	17.0035	15907		?	0	600	Calibration	-
1534	17.0146	15889.6		?	0	600	Calibration	-
1535	17.0257	15936.5		?	0	600	Calibration	-
1536	17.0368	15939		?	0	600	Calibration	-
1537	17.0478	15937.5		?	0	600	Calibration	-
1538	17.0589	15955.3		?	0	600	Calibration	-
1539	17.07	15945.8		?	0	600	Calibration	-
1540	17.0811	15963.7		?	0	600	Calibration	-
1541	17.0922	15924.3		?	0	600	Calibration	-
1542	17.1033	15914.9		?	0	600	Calibration	-
1543	17.1144	15971		?	0	600	Calibration	-
1544	17.1254	15963.5		?	0	600	Calibration	-
1545	17.1365	15961.8		?	0	600	Calibration	-
1546	17.1476	15946.3		?	0	600	Calibration	-
1547	17.1587	15985.8		?	0	600	Calibration	-
1548	17.1698	15911.9		?	0	600	Calibration	-
1549	17.1809	16009.2		?	0	600	Calibration	-
1550	17.1919	15930		?	0	600	Calibration	-
1551	17.203	15929		?	0	600	Calibration	-
1552	17.2141	15901.6		?	0	600	Calibration	-
1553	17.2252	15921.2		?	0	600	Calibration	-
1554	17.2363	15949.8		?	0	600	Calibration	-
1555	17.2474	15953.4		?	0	600	Calibration	-
1556	17.2584	15944.6		?	0	600	Calibration	-
1557	17.2695	15946.1		?	0	600	Calibration	-
1558	17.2806	15979.4		?	0	600	Calibration	-
1559	17.2917	15949.1		?	0	600	Calibration	-
1560	17.3028	15913		?	0	600	Calibration	-
1561	17.3139	15945.5		?	0	600	Calibration	-
1562	17.325	15987.1		?	0	600	Calibration	-
1563	17.336	15926.2		?	0	600	Calibration	-
1564	17.3471	15889.9		?	0	600	Calibration	-
1565	17.3582	15988.8		?	0	600	Calibration	-
1566	17.3693	15960.1		?	0	600	Calibration	-
1567	17.3804	16039		?	0	600	Calibration	-
1568	17.3915	15981.3		?	0	600	Calibration	-
1569	17.4025	16024.2		?	0	600	Calibration	-
1570	17.4136	15975		?	0	600	Calibration	-
1571	17.4247	15990.3		?	0	600	Calibration	-
1572	17.4358	15959.1		?	0	600	Calibration	-
1573	17.4469	15947.3		?	0	600	Calibration	-
1574	17.458	15948.1		?	0	600	Calibration	-
1575	17.4691	15958.9		?	0	600	Calibration	-
1576	17.4801	15989.3		?	0	600	Calibration	-
1577	17.4912	16020.9		?	0	600	Calibration	-
1578	17.5023	16034.2		?	0	600	Calibration	-
1579	17.5134	16022		?	0	600	Calibration	-
1580	17.5245	16012.7		?	0	600	Calibration	-
1581	17.5356	15982.4		?	0	600	Calibration	-
1582	17.5466	16048.6		?	0	600	Calibration	-
1583	17.5577	16000.6		?	0	600	Calibration	-
1584	17.5688	16011		?	0	600	Calibration	-
1585	17.5799	16030.2		?	0	600	Calibration	-
1586	17.591	16000.8		?	0	600	Calibration	-
1587	17.6021	16035		?	0	600	Calibration	-
1588	17.6131	15987.9		?	0	600	Calibration	-
1589	17.6242	16018.2		?	0	600	Calibration	-
1590	17.6353	16042.8		?	0	600	Calibration	-
1591	17.6464	16031.3		?	0	600	Calibration	-
1592	17.6575	15997.4		?	0	600	Calibration	-
1593	17.6686	15946.6		?	0	600	Calibration	-
1594	17.6797	16052.3		?	0	600	Calibration	-
1595	17.6907	16060.9		?	0	600	Calibration	-
1596	17.7018	15967.1		?	0	600	Calibration	-
1597	17.7129	16014		?	0	600	Calibration	-
1598	17.724	16042		?	0	600	Calibration	-
1599	17.7351	16038.2		?	0	600	Calibration	-
1600	17.7462	16024.1		?	0	600	Calibration	-
1601	17.7572	16019.6		?	0	600	Calibration	-
1602	17.7683	16036.6		?	0	600	Calibration	-
1603	17.7794	15986.3		?	0	600	Calibration	-
1604	17.7905	15975.2		?	0	600	Calibration	-
1605	17.8016	15994.1		?	0	600	Calibration	-
1606	17.8127	15999.7		?	0	600	Calibration	-
1607	17.8238	16034.3		?	0	600	Calibration	-
1608	17.8348	15984.4		?	0	600	Calibration	-
1609	17.8459	16015.1		?	0	600	Calibration	-
1610	17.857	15970		?	0	600	Calibration	-
1611	17.8681	16066.2		?	0	600	Calibration	-
1612	17.8792	16041.3		?	0	600	Calibration	-
1613	17.8903	16048.7		?	0	600	Calibration	-
1614	17.9013	16024.9		?	0	600	Calibration	-
1615	17.9124	16047.3		?	0	600	Calibration	-
1616	17.9235	16063		?	0	600	Calibration	-
1617	17.9346	16063.9		?	0	600	Calibration	-
1618	17.9457	16071.9		?	0	600	Calibration	-
1619	17.9568	16037.6		?	0	600	Calibration	-
1620	17.9679	16079.4		?	0	600	Calibration	-
1621	17.9789	16073.1		?	0	600	Calibration	-
1622	17.99	16087.6		?	0	600	Calibration	-
1623	18.0011	16082.9		?	0	600	Calibration	-
1624	18.0122	16094.9		?	0	600	Calibration	-
1625	18.0233	16103		?	0	600	Calibration	-
1626	18.0344	16053.8		?	0	600	Calibration	-
1627	18.0454	16091.9		?	0	600	Calibration	-
1628	18.0565	16137.9		?	0	600	Calibration	-
1629	18.0676	16080		?	0	600	Calibration	-
1630	18.0787	16032		?	0	600	Calibration	-
1631	18.0898	16085.4		?	0	600	Calibration	-
1632	18.1009	16000.8		?	0	600	Calibration	-
1633	18.1119	16000.8		?	0	600	Calibration	-
1634	18.123	16007.7		?	0	600	Calibration	-
1635	18.1341	16079.5		?	0	600	Calibration	-
1636	18.1452	16098.6		?	0	600	Calibration	-
1637	18.1563	16094.2		?	0	600	Calibration	-
1638	18.1674	16101.3		?	0	600	Calibration	-
1639	18.1785	16115.1		?	0	600	Calibration	-
1640	18.1895	16085.9		?	0	600	Calibration	-
1641	18.2006	16129.4		?	0	600	Calibration	-
1642	18.2117	16179.2		?	0	600	Calibration	-
1643	18.2228	16158.3		?	0	600	Calibration	-
1644	18.2339	16140.2		?	0	600	Calibration	-
1645	18.245	16150.7		?	0	600	Calibration	-
1646	18.256	16176.9		?	0	600	Calibration	-
1647	18.2671	16184.6		?	0	600	Calibration	-
1648	18.2782	16109.5		?	0	600	Calibration	-
1649	18.2893	16136.7		?	0	600	Calibration	-
1650	18.3004	16203		?	0	600	Calibration	-
1651	18.3115	16191.4		?	0	600	Calibration	-
1652	18.3226	16207.2		?	0	600	Calibration	-
1653	18.3336	16227.2		?	0	600	Calibration	-
1654	18.3447	16197.1		?	0	600	Calibration	-
1655	18.3558	16213.3		?	0	600	Calibration	-
1656	18.3669	16213.8		?	0	600	Calibration	-
1657	18.378	16260.6		?	0	600	Calibration	-
1658	18.3891	16201.5		?	0	600	Calibration	-
1659	18.4001	16192.1		?	0	600	Calibration	-
1660	18.4112	16227.1		?	0	600	Calibration	-
1661	18.4223	16265.5		?	0	600	Calibration	-
1662	18.4334	16283.7		?	0	600	Calibration	-
1663	18.4445	16234.6		?	0	600	Calibration	-
1664	18.4556	16341.4		?	0	600	Calibration	-
1665	18.4666	16323.4		?	0	600	Calibration	-
1666	18.4777	16348.5		?	0	600	Calibration	-
1667	18.4888	16319		?	0	600	Calibration	-
1668	18.4999	16344		?	0	600	Calibration	-
1669	18.511	16394.9		?	0	600	Calibration	-
1670	18.5221	16387.9		?	0	600	Calibration	-
1671	18.5332	16452.7		?	0	600	Calibration	-
1672	18.5442	16515.3		?	0	600	Calibration	-
1673	18.5553	16482.6		?	0	600	Calibration	-
1674	18.5664	16554		?	0	600	Calibration	-
1675	18.5775	16583		?	0	600	Calibration	-
1676	18.5886	16678		?	0	600	Calibration	-
1677	18.5997	16799.1		?	0	600	Calibration	-
1678	18.6107	16920.7		?	0	600	Calibration	-
1679	18.6218	17132.9		?	0	600	Calibration	-
1680	18.6329	17326.6		?	0	600	Calibration	-
1681	18.644	17663.8		?	0	600	Calibration	-
1682	18.6551	18192.8		?	0	600	Calibration	-
1683	18.6662	18632.6		?	0	600	Calibration	-
1684	18.6773	19005.9		?	0	600	Calibration	-
1685	18.6883	19328		?	0	600	Calibration	-
1686	18.6994	19370.7		?	0	600	Calibration	-
1687	18.7105	19347.8		?	0	600	Calibration	-
1688	18.7216	19263.4		?	0	600	Calibration	-
1689	18.7327	19229		?	0	600	Calibration	-
1690	18.7438	19065.8		?	0	600	Calibration	-
1691	18.7548	18879.5		?	0	600	Calibration	-
1692	18.7659	18789.4		?	0	600	Calibration	-
1693	18.777	18590.4		?	0	600	Calibration	-
1694	18.7881	18264.2		?	0	600	Calibration	-
1695	18.7992	17803.8		?	0	600	Calibration	-
1696	18.8103	16158.6		?	0	600	Calibration	-
1697	18.8214	14164.2		?	0	600	Calibration	-
1698	18.8324	14117.1		?	0	600	Calibration	-
1699	18.8435	14285.5		?	0	600	Calibration	-
1700	18.8546	14522.5		?	0	600	Calibration	-
1701	18.8657	14866.8		?	0	600	Calibration	-
1702	18.8768	15203.5		?	0	600	Calibration	-
1703	18.8879	15548.4		?	0	600	Calibration	-
1704	18.8989	15870.3		?	0	600	Calibration	-
1705	18.91	16141.8		?	0	600	Calibration	-
1706	18.9211	16282		?	0	600	Calibration	-
1707	18.9322	16530.7		?	0	600	Calibration	-
1708	18.9433	16830.8		?	0	600	Calibration	-
1709	18.9544	17452.9		?	0	600	Calibration	-
1710	18.9654	18750.1		?	0	600	Calibration	-
1711	18.9765	19604.7		?	0	600	Calibration	-
1712	18.9876	19909.3		?	0	600	Calibration	-
1713	18.9987	19922.9		?	0	600	Calibration	-
1714	19.0098	19984.1		?	0	600	Calibration	-
1715	19.0209	19749.7		?	0	600	Calibration	-
1716	19.032	19634.4		?	0	600	Calibration	-
1717	19.043	19524.8		?	0	600	Calibration	-
1718	19.0541	19314		?	0	600	Calibration	-
1719	19.0652	19082		?	0	600	Calibration	-
1720	19.0763	18599.2		?	0	600	Calibration	-
1721	19.0874	17648.2		?	0	600	Calibration	-
1722	19.0985	14388		?	0	600	Calibration	-
1723	19.1095	14100.9		?	0	600	Calibration	-
1724	19.1206	14199.4		?	0	600	Calibration	-
1725	19.1317	14385.3		?	0	600	Calibration	-
1726	19.1428	14673.5		?	0	600	Calibration	-
1727	19.1539	14923.5		?	0	600	Calibration	-
1728	19.165	15313.8		?	0	600	Calibration	-
1729	19.1761	15666.7		?	0	600	Calibration	-
1730	19.1871	16026.2		?	0	600	Calibration	-
1731	19.1982	16251.5		?	0	600	Calibration	-
1732	19.2093	16588.6		?	0	600	Calibration	-
1733	19.2204	17208.7		?	0	600	Calibration	-
1734	19.2315	18899.9		?	0	600	Calibration	-
1735	19.2426	20008.6		?	0	600	Calibration	-
1736	19.2536	20185.2		?	0	600	Calibration	-
1737	19.2647	20252.2		?	0	600	Calibration	-
1738	19.2758	20284.9		?	0	600	Calibration	-
1739	19.2869	20093.1		?	0	600	Calibration	-
1740	19.298	19949.9		?	0	600	Calibration	-
1741	19.3091	19707.4		?	0	600	Calibration	-
1742	19.3202	19469.9		?	0	600	Calibration	-
1743	19.3312	19228.9		?	0	600	Calibration	-
1744	19.3423	18900		?	0	600	Calibration	-
1745	19.3534	18153.1		?	0	600	Calibration	-
1746	19.3645	14758.3		?	0	600	Calibration	-
1747	19.3756	14125.4		?	0	600	Calibration	-
1748	19.3867	14132.6		?	0	600	Calibration	-
1749	19.3977	14375.8		?	0	600	Calibration	-
1750	19.4088	14553.7		?	0	600	Calibration	-
1751	19.4199	14855.2		?	0	600	Calibration	-
1752	19.431	15189.2		?	0	600	Calibration	-
1753	19.4421	15528.9		?	0	600	Calibration	-
1754	19.4532	15902.8		?	0	600	Calibration	-
1755	19.4642	16198.7		?	0	600	Calibration	-
1756	19.4753	16415.4		?	0	600	Calibration	-
1757	19.4864	16955.9		?	0	600	Calibration	-
1758	19.4975	18725.4		?	0	600	Calibration	-
1759	19.5086	19947.2		?	0	600	Calibration	-
1760	19.5197	20243		?	0	600	Calibration	-
1761	19.5308	20305		?	0	600	Calibration	-
1762	19.5418	20326.1		?	0	600	Calibration	-
1763	19.5529	20219.1		?	0	600	Calibration	-
1764	19.564	20033.6		?	0	600	Calibration	-
1765	19.5751	19901.9		?	0	600	Calibration	-
1766	19.5862	19633.6		?	0	600	Calibration	-
1767	19.5973	19410.5		?	0	600	Calibration	-
1768	19.6083	19066.3		?	0	600	Calibration	-
1769	19.6194	18258.4		?	0	600	Calibration	-
1770	19.6305	14631.6		?	0	600	Calibration	-
1771	19.6416	14128.6		?	0	600	Calibration	-
1772	19.6527	14188.9		?	0	600	Calibration	-
1773	19.6638	14317		?	0	600	Calibration	-
1774	19.6749	14557.3		?	0	600	Calibration	-
1775	19.6859	14818.4		?	0	600	Calibration	-
1776	19.697	15141.5		?	0	600	Calibration	-
1777	19.7081	15472.4		?	0	600	Calibration	-
1778	19.7192	15859.7		?	0	600	Calibration	-
1779	19.7303	16122.3		?	0	600	Calibration	-
1780	19.7414	16425.9		?	0	600	Calibration	-
1781	19.7524	17040.6		?	0	600	Calibration	-
1782	19.7635	19006.5		?	0	600	Calibration	-
1783	19.7746	20083.3		?	0	600	Calibration	-
1784	19.7857	20359.2		?	0	600	Calibration	-
1785	19.7968	20379.6		?	0	600	Calibration	-
1786	19.8079	20385.2		?	0	600	Calibration	-
1787	19.8189	20342.4		?	0	600	Calibration	-
1788	19.83	20103.7		?	0	600	Calibration	-
1789	19.8411	19970.1		?	0	600	Calibration	-
1790	19.8522	19724.7		?	0	600	Calibration	-
1791	19.8633	19384		?	0	600	Calibration	-
1792	19.8744	18944.8		?	0	600	Calibration	-
1793	19.8855	17455.9		?	0	600	Calibration	-
1794	19.8965	14297.7		?	0	600	Calibration	-
1795	19.9076	14090.2		?	0	600	Calibration	-
1796	19.9187	14138.3		?	0	600	Calibration	-
1797	19.9298	14372.4		?	0	600	Calibration	-
1798	19.9409	14571.4		?	0	600	Calibration	-
1799	19.952	14895.8		?	0	600	Calibration	-
1800	19.963	15130.5		?	0	600	Calibration	-
1801	19.9741	15508		?	0	600	Calibration	-
1802	19.9852	15867		?	0	600	Calibration	-
1803	19.9963	16052.5		?	0	600	Calibration	-
1804	20.0074	16401.5		?	0	600	Calibration	-
1805	20.0185	16906.5		?	0	600	Calibration	-
1806	20.0296	18805.3		?	0	600	Calibration	-
1807	20.0406	20030.3		?	0	600	Calibration	-
1808	20.0517	20329.2		?	0	600	Calibration	-
1809	20.0628	20408.1		?	0	600	Calibration	-
1810	20.0739	20328.2		?	0	600	Calibration	-
1811	20.085	20268.5		?	0	600	Calibration	-
1812	20.0961	20139.2		?	0	600	Calibration	-
1813	20.1071	19978.7		?	0	600	Calibration	-
1814	20.1182	19743.7		?	0	600	Calibration	-
1815	20.1293	19449.7		?	0	600	Calibration	-
1816	20.1404	19096.5		?	0	600	Calibration	-
1817	20.1515	18202.3		?	0	600	Calibration	-
1818	20.1626	14473.3		?	0	600	Calibration	-
1819	20.1737	14109.4		?	0	600	Calibration	-
1820	20.1847	14142.4		?	0	600	Calibration	-
1821	20.1958	14304.4		?	0	600	Calibration	-
1822	20.2069	14558.2		?	0	600	Calibration	-
1823	20.218	14772.7		?	0	600	Calibration	-
1824	20.2291	15052		?	0	600	Calibration	-
1825	20.2402	15395.2		?	0	600	Calibration	-
1826	20.2512	15725		?	0	600	Calibration	-
1827	20.2623	16004.5		?	0	600	Calibration	-
1828	20.2734	16162.7		?	0	600	Calibration	-
1829	20.2845	16478.7		?	0	600	Bleach correction function: exp. offset = 6867.694358279164 * exp(-0.0024852745970930113 * x) + 16292.259950892301	-
1830	20.2956	17257.1		?	0	600	Calculating F0: 22849.833751968923	Step 1: 0.0 %
1831	20.3067	19346.6	27379.9	-15.33	19.83	600	Hold. Current dF/F0 in tolerance range.	Step 1: 0.0 %
1832	20.3177	20091.3	28434.2	-12.07	24.44	600	Current dF/F0 greater than holding dF/F0 (0.0 %). --> Change wavelength by 97.0 nm	Step 1: 0.0 %
1833	20.3288	20288.7	28713.8	-11.21	25.66	503	Current dF/F0 greater than holding dF/F0 (0.0 %). --> Change wavelength by 102.0 nm	Step 1: 0.0 %
1834	20.3399	19905.5	28171.8	-12.89	23.29	401	Lower wavelength limit (400.0nm) reached --> Correction.	Step 1: 0.0 %
1835	20.351	14878.8	21057.8	-34.88	-7.84	400	Lower wavelength limit (400.0nm) reached --> Correction.	Step 1: 0.0 %
1836	20.3621	14001.2	19816.1	-38.72	-13.28	400	Current dF/F0 smaller than holding dF/F0 (0.0 %). --> Change wavelength by 53.0 nm	Step 1: 0.0 %
1837	20.3732	14138.4	20010.5	-38.12	-12.43	453	Current dF/F0 smaller than holding dF/F0 (0.0 %). --> Change wavelength by 49.0 nm	Step 1: 0.0 %
1838	20.3843	14605	20671	-36.08	-9.54	502	Current dF/F0 smaller than holding dF/F0 (0.0 %). --> Change wavelength by 38.0 nm	Step 1: 0.0 %
1839	20.3953	14723	20838.2	-35.57	-8.8	540	Current dF/F0 smaller than holding dF/F0 (0.0 %). --> Change wavelength by 35.0 nm	Step 1: 0.0 %
1840	20.4064	14720.4	20834.8	-35.58	-8.82	575	Upper wavelength limit (600.0nm) reached --> Correction.	Step 1: 0.0 %
1841	20.4175	14657.2	20745.6	-35.85	-9.21	600	Upper wavelength limit (600.0nm) reached --> Correction.	Step 1: 0.0 %
1842	20.4286	14673.5	20768.8	-35.78	-9.11	600	Upper wavelength limit (600.0nm) reached --> Correction.	Step 1: 0.0 %
1843	20.4397	14758.7	20889.6	-35.41	-8.58	600	Upper wavelength limit (600.0nm) reached --> Correction.	Step 1: 0.0 %
1844	20.4508	14810.9	20963.7	-35.18	-8.25	600	Upper wavelength limit (600.0nm) reached --> Correction.	Step 1: 0.0 %
1845	20.4618	14799.5	20947.8	-35.23	-8.32	600	Upper wavelength limit (600.0nm) reached --> Correction.	Step 1: 0.0 %
1846	20.4729	14890.7	21077.2	-34.83	-7.76	600	Upper wavelength limit (600.0nm) reached --> Correction.	Step 1: 0.0 %
1847	20.484	14884.6	21068.7	-34.86	-7.79	600	Upper wavelength limit (600.0nm) reached --> Correction.	Step 1: 0.0 %
1848	20.4951	14933.2	21137.9	-34.65	-7.49	600	Upper wavelength limit (600.0nm) reached --> Correction.	Step 1: 0.0 %
1849	20.5062	14979.8	21204	-34.44	-7.2	600	Upper wavelength limit (600.0nm) reached --> Correction.	Step 1: 0.0 %
1850	20.5173	15054	21309.3	-34.12	-6.74	600	Upper wavelength limit (600.0nm) reached --> Correction.	Step 1: 0.0 %
1851	20.5284	15035.2	21282.9	-34.2	-6.86	600	Upper wavelength limit (600.0nm) reached --> Correction.	Step 1: 0.0 %
1852	20.5394	15101.5	21376.8	-33.91	-6.45	600	Upper wavelength limit (600.0nm) reached --> Correction.	Step 1: 0.0 %
1853	20.5505	15087.2	21357	-33.97	-6.53	600	Upper wavelength limit (600.0nm) reached --> Correction.	Step 1: 0.0 %
1854	20.5616	15156.1	21454.7	-33.67	-6.11	600	Upper wavelength limit (600.0nm) reached --> Correction.	Step 1: 0.0 %
1855	20.5727	15216.5	21540.4	-33.41	-5.73	600	Upper wavelength limit (600.0nm) reached --> Correction.	Step 1: 0.0 %
1856	20.5838	15139.5	21431.6	-33.74	-6.21	600	Upper wavelength limit (600.0nm) reached --> Correction.	Step 1: 0.0 %
1857	20.5949	15173.9	21480.6	-33.59	-5.99	600	Upper wavelength limit (600.0nm) reached --> Correction.	Step 1: 0.0 %
1858	20.6059	15200.3	21518.1	-33.48	-5.83	600	Upper wavelength limit (600.0nm) reached --> Correction.	Step 1: 0.0 %
1859	20.617	15211.1	21533.6	-33.43	-5.76	600	Upper wavelength limit (600.0nm) reached --> Correction.	Step 1: 0.0 %
1860	20.6281	15281.9	21634.1	-33.12	-5.32	600	Upper wavelength limit (600.0nm) reached --> Correction.	Step 1: 0.0 %
1861	20.6392	15247.8	21586	-33.27	-5.53	600	Upper wavelength limit (600.0nm) reached --> Correction.	Step 1: 0.0 %
1862	20.6503	15337.1	21712.7	-32.88	-4.98	600	Upper wavelength limit (600.0nm) reached --> Correction.	Step 1: 0.0 %
1863	20.6614	15325.8	21696.8	-32.93	-5.05	600	Upper wavelength limit (600.0nm) reached --> Correction.	Step 1: 0.0 %
1864	20.6725	15352.6	21735	-32.81	-4.88	600	Upper wavelength limit (600.0nm) reached --> Correction.	Step 1: 0.0 %
1865	20.6835	15355.5	21739.4	-32.8	-4.86	600	Upper wavelength limit (600.0nm) reached --> Correction.	Step 1: 0.0 %
1866	20.6946	15371.6	21762.4	-32.73	-4.76	600	Upper wavelength limit (600.0nm) reached --> Correction.	Step 1: 0.0 %
1867	20.7057	15373.6	21765.4	-32.72	-4.75	600	Upper wavelength limit (600.0nm) reached --> Correction.	Step 1: 0.0 %
1868	20.7168	15410.4	21817.7	-32.56	-4.52	600	Upper wavelength limit (600.0nm) reached --> Correction.	Step 1: 0.0 %
1869	20.7279	15403.9	21808.8	-32.59	-4.56	600	Upper wavelength limit (600.0nm) reached --> Correction.	Step 1: 0.0 %
1870	20.739	15438.5	21858	-32.43	-4.34	600	Upper wavelength limit (600.0nm) reached --> Correction.	Step 1: 0.0 %
1871	20.75	15415.7	21825.9	-32.53	-4.48	600	Upper wavelength limit (600.0nm) reached --> Correction.	Step 1: 0.0 %
1872	20.7611	15438.5	21858.4	-32.44	-4.34	600	Upper wavelength limit (600.0nm) reached --> Correction.	Step 1: 0.0 %
1873	20.7722	15486	21925.9	-32.23	-4.04	600	Upper wavelength limit (600.0nm) reached --> Correction.	Step 1: 0.0 %
1874	20.7833	15497.2	21942	-32.18	-3.97	600	Upper wavelength limit (600.0nm) reached --> Correction.	Step 1: 0.0 %
1875	20.7944	15500.9	21947.4	-32.16	-3.95	600	Upper wavelength limit (600.0nm) reached --> Correction.	Step 1: 0.0 %
1876	20.8055	15515.8	21968.7	-32.1	-3.86	600	Upper wavelength limit (600.0nm) reached --> Correction.	Step 1: 0.0 %
1877	20.8165	15499	21945.1	-32.17	-3.96	600	Upper wavelength limit (600.0nm) reached --> Correction.	Step 1: 0.0 %
1878	20.8276	15514.5	21967.3	-32.1	-3.86	600	Upper wavelength limit (600.0nm) reached --> Correction.	Step 1: 0.0 %
1879	20.8387	15504.8	21953.8	-32.14	-3.92	600	Upper wavelength limit (600.0nm) reached --> Correction.	Step 1: 0.0 %
1880	20.8498	15556	22026.5	-31.92	-3.6	600	Upper wavelength limit (600.0nm) reached --> Correction.	Step 1: 0.0 %
1881	20.8609	15538.6	22002.1	-32	-3.71	600	Upper wavelength limit (600.0nm) reached --> Correction.	Step 1: 0.0 %
1882	20.872	15518	21973.2	-32.09	-3.84	600	Upper wavelength limit (600.0nm) reached --> Correction.	Step 1: 0.0 %
1883	20.8831	15541.3	22006.4	-31.98	-3.69	600	Upper wavelength limit (600.0nm) reached --> Correction.	Step 1: 0.0 %
1884	20.8941	15580.2	22061.7	-31.81	-3.45	600	Upper wavelength limit (600.0nm) reached --> Correction.	Step 1: 0.0 %
1885	20.9052	15602.8	22093.8	-31.72	-3.31	600	Upper wavelength limit (600.0nm) reached --> Correction.	Step 1: 0.0 %
1886	20.9163	15608	22101.4	-31.69	-3.28	600	Upper wavelength limit (600.0nm) reached --> Correction.	Step 1: 0.0 %
1887	20.9274	15637.7	22143.7	-31.56	-3.09	600	Upper wavelength limit (600.0nm) reached --> Correction.	Step 1: 0.0 %
1888	20.9385	15604.3	22096.7	-31.71	-3.3	600	Upper wavelength limit (600.0nm) reached --> Correction.	Step 1: 0.0 %
1889	20.9496	15596.7	22086.1	-31.74	-3.34	600	Upper wavelength limit (600.0nm) reached --> Correction.	Step 1: 0.0 %
1890	20.9606	15551.6	22022.5	-31.94	-3.62	600	Upper wavelength limit (600.0nm) reached --> Correction.	Step 1: 0.0 %
1891	20.9717	15597.2	22087.2	-31.74	-3.34	600	Upper wavelength limit (600.0nm) reached --> Correction.	Step 1: 0.0 %
1892	20.9828	15635.1	22141.1	-31.57	-3.1	600	Upper wavelength limit (600.0nm) reached --> Correction.	Step 1: 0.0 %
1893	20.9939	15624.8	22126.6	-31.62	-3.17	600	Upper wavelength limit (600.0nm) reached --> Correction.	Step 1: 0.0 %
1894	21.005	15591	22079	-31.77	-3.37	600	Upper wavelength limit (600.0nm) reached --> Correction.	Step 1: 0.0 %
1895	21.0161	15570.8	22050.6	-31.86	-3.5	600	Upper wavelength limit (600.0nm) reached --> Correction.	Step 1: 0.0 %
1896	21.0272	15611.5	22108.5	-31.68	-3.24	600	Upper wavelength limit (600.0nm) reached --> Correction.	Step 1: 0.0 %
1897	21.0382	15621.2	22122.4	-31.64	-3.18	600	Upper wavelength limit (600.0nm) reached --> Correction.	Step 1: 0.0 %
1898	21.0493	15609.6	22106.2	-31.69	-3.25	600	Upper wavelength limit (600.0nm) reached --> Correction.	Step 1: 0.0 %
1899	21.0604	15590	22078.6	-31.77	-3.38	600	Upper wavelength limit (600.0nm) reached --> Correction.	Step 1: 0.0 %
1900	21.0715	15576	22059	-31.83	-3.46	600	Upper wavelength limit (600.0nm) reached --> Correction.	Step 1: 0.0 %
1901	21.0826	15597.2	22089.3	-31.74	-3.33	600	Upper wavelength limit (600.0nm) reached --> Correction.	Step 1: 0.0 %
1902	21.0937	15604.2	22099.4	-31.71	-3.28	600	Upper wavelength limit (600.0nm) reached --> Correction.	Step 1: 0.0 %
1903	21.1047	15609.4	22107	-31.69	-3.25	600	Upper wavelength limit (600.0nm) reached --> Correction.	Step 1: 0.0 %
1904	21.1158	15585.2	22072.9	-31.79	-3.4	600	Upper wavelength limit (600.0nm) reached --> Correction.	Step 1: 0.0 %
1905	21.1269	15612.2	22111.4	-31.67	-3.23	600	Upper wavelength limit (600.0nm) reached --> Correction.	Step 1: 0.0 %
1906	21.138	15608.5	22106.3	-31.69	-3.25	600	Upper wavelength limit (600.0nm) reached --> Correction.	Step 1: 0.0 %
1907	21.1491	15610.7	22109.6	-31.68	-3.24	600	Upper wavelength limit (600.0nm) reached --> Correction.	Step 1: 0.0 %
1908	21.1602	15593.1	22084.9	-31.76	-3.35	600	Upper wavelength limit (600.0nm) reached --> Correction.	Step 1: 0.0 %
1909	21.1712	15599.1	22093.5	-31.73	-3.31	600	Upper wavelength limit (600.0nm) reached --> Correction.	Step 1: 0.0 %
1910	21.1823	15571.5	22054.7	-31.85	-3.48	600	Upper wavelength limit (600.0nm) reached --> Correction.	Step 1: 0.0 %
1911	21.1934	15563.4	22043.4	-31.89	-3.53	600	Upper wavelength limit (600.0nm) reached --> Correction.	Step 1: 0.0 %
1912	21.2045	15580.1	22067.3	-31.82	-3.42	600	Upper wavelength limit (600.0nm) reached --> Correction.	Step 1: 0.0 %
1913	21.2156	15597.9	22092.7	-31.74	-3.31	600	Upper wavelength limit (600.0nm) reached --> Correction.	Step 1: 0.0 %
1914	21.2267	15574.6	22059.9	-31.84	-3.46	600	Upper wavelength limit (600.0nm) reached --> Correction.	Step 1: 0.0 %
1915	21.2378	15606.4	22105.2	-31.7	-3.26	600	Upper wavelength limit (600.0nm) reached --> Correction.	Step 1: 0.0 %
1916	21.2488	15626.3	22133.4	-31.61	-3.14	600	Upper wavelength limit (600.0nm) reached --> Correction.	Step 1: 0.0 %
1917	21.2599	15640.7	22154.2	-31.55	-3.04	600	Upper wavelength limit (600.0nm) reached --> Correction.	Step 1: 0.0 %
1918	21.271	15592.6	22086.1	-31.76	-3.34	600	Upper wavelength limit (600.0nm) reached --> Correction.	Step 1: 0.0 %
1919	21.2821	15629.7	22138.9	-31.6	-3.11	600	Upper wavelength limit (600.0nm) reached --> Correction.	Step 1: 0.0 %
1920	21.2932	15616.8	22120.8	-31.65	-3.19	600	Upper wavelength limit (600.0nm) reached --> Correction.	Step 1: 0.0 %
1921	21.3043	15602.8	22101.2	-31.72	-3.28	600	Upper wavelength limit (600.0nm) reached --> Correction.	Step 1: 0.0 %
1922	21.3153	15573.8	22060.3	-31.84	-3.46	600	Upper wavelength limit (600.0nm) reached --> Correction.	Step 1: 0.0 %
1923	21.3264	15577.2	22065.3	-31.83	-3.43	600	Upper wavelength limit (600.0nm) reached --> Correction.	Step 1: 0.0 %
1924	21.3375	15586.7	22079	-31.79	-3.37	600	Upper wavelength limit (600.0nm) reached --> Correction.	Step 1: 0.0 %
1925	21.3486	15563.1	22045.7	-31.89	-3.52	600	Upper wavelength limit (600.0nm) reached --> Correction.	Step 1: 0.0 %
1926	21.3597	15612.4	22115.8	-31.67	-3.21	600	Upper wavelength limit (600.0nm) reached --> Correction.	Step 1: 0.0 %
1927	21.3708	15554.8	22034.4	-31.93	-3.57	600	Upper wavelength limit (600.0nm) reached --> Correction.	Step 1: 0.0 %
1928	21.3819	15550.5	22028.5	-31.94	-3.59	600	Upper wavelength limit (600.0nm) reached --> Correction.	Step 1: 0.0 %
1929	21.3929	15604.6	22105.3	-31.71	-3.26	600	Upper wavelength limit (600.0nm) reached --> Correction.	Step 1: 0.0 %
1930	21.404	15589.7	22084.3	-31.77	-3.35	600	Upper wavelength limit (600.0nm) reached --> Correction.	Step 1: 0.0 %
1931	21.4151	15541.7	22016.6	-31.98	-3.65	600	Upper wavelength limit (600.0nm) reached --> Correction.	Step 1: 0.0 %
1932	21.4262	15551.1	22030	-31.94	-3.59	600	Upper wavelength limit (600.0nm) reached --> Correction.	Step 1: 0.0 %
1933	21.4373	15602.9	22103.7	-31.72	-3.27	600	Upper wavelength limit (600.0nm) reached --> Correction.	Step 1: 0.0 %
1934	21.4484	15575.8	22065.4	-31.83	-3.43	600	Upper wavelength limit (600.0nm) reached --> Correction.	Step 1: 0.0 %
1935	21.4594	15617.5	22124.7	-31.65	-3.17	600	Upper wavelength limit (600.0nm) reached --> Correction.	Step 1: 0.0 %
1936	21.4705	15601	22101.5	-31.72	-3.28	600	Upper wavelength limit (600.0nm) reached --> Correction.	Step 1: 0.0 %
1937	21.4816	15594.9	22093	-31.75	-3.31	600	Upper wavelength limit (600.0nm) reached --> Correction.	Step 1: 0.0 %
1938	21.4927	15617.9	22125.8	-31.65	-3.17	600	Upper wavelength limit (600.0nm) reached --> Correction.	Step 1: 0.0 %
1939	21.5038	15609.5	22114.1	-31.69	-3.22	600	Upper wavelength limit (600.0nm) reached --> Correction.	Step 1: 0.0 %
1940	21.5149	15591	22088	-31.77	-3.33	600	Upper wavelength limit (600.0nm) reached --> Correction.	Step 1: 0.0 %
1941	21.526	15631.4	22145.4	-31.59	-3.08	600	Upper wavelength limit (600.0nm) reached --> Correction.	Step 1: 0.0 %
1942	21.537	15639.5	22157.2	-31.56	-3.03	600	Upper wavelength limit (600.0nm) reached --> Correction.	Step 1: 0.0 %
1943	21.5481	15636.6	22153.2	-31.57	-3.05	600	Upper wavelength limit (600.0nm) reached --> Correction.	Step 1: 0.0 %
1944	21.5592	15571.1	22060.6	-31.85	-3.45	600	Upper wavelength limit (600.0nm) reached --> Correction.	Step 1: 0.0 %
1945	21.5703	15609.8	22115.7	-31.69	-3.21	600	Upper wavelength limit (600.0nm) reached --> Correction.	Step 1: 0.0 %
1946	21.5814	15634.7	22151.1	-31.58	-3.06	600	Upper wavelength limit (600.0nm) reached --> Correction.	Step 1: 0.0 %
1947	21.5925	15583.1	22078.2	-31.8	-3.38	600	Upper wavelength limit (600.0nm) reached --> Correction.	Step 1: 0.0 %
1948	21.6035	15631.3	22146.7	-31.59	-3.08	600	Upper wavelength limit (600.0nm) reached --> Correction.	Step 1: 0.0 %
1949	21.6146	15573.3	22064.7	-31.84	-3.44	600	Upper wavelength limit (600.0nm) reached --> Correction.	Step 1: 0.0 %
1950	21.6257	15586.7	22083.8	-31.79	-3.35	600	Upper wavelength limit (600.0nm) reached --> Correction.	Step 1: 0.0 %
1951	21.6368	15641.3	22161.4	-31.55	-3.01	600	Upper wavelength limit (600.0nm) reached --> Correction.	Step 1: 0.0 %
1952	21.6479	15619.2	22130.3	-31.64	-3.15	600	Upper wavelength limit (600.0nm) reached --> Correction.	Step 1: 0.0 %
1953	21.659	15687.2	22226.8	-31.35	-2.73	600	Upper wavelength limit (600.0nm) reached --> Correction.	Step 1: 0.0 %
1954	21.67	15652.9	22178.3	-31.5	-2.94	600	Upper wavelength limit (600.0nm) reached --> Correction.	Step 1: 0.0 %
1955	21.6811	15677.8	22213.8	-31.39	-2.78	600	Upper wavelength limit (600.0nm) reached --> Correction.	Step 1: 0.0 %
1956	21.6922	15665.7	22196.8	-31.44	-2.86	600	Upper wavelength limit (600.0nm) reached --> Correction.	Step 1: 0.0 %
1957	21.7033	15705.4	22253.3	-31.27	-2.61	600	Upper wavelength limit (600.0nm) reached --> Correction.	Step 1: 0.0 %
1958	21.7144	15693.4	22236.4	-31.32	-2.68	600	Upper wavelength limit (600.0nm) reached --> Correction.	Step 1: 0.0 %
1959	21.7255	15628.8	22145	-31.6	-3.08	600	Upper wavelength limit (600.0nm) reached --> Correction.	Step 1: 0.0 %
1960	21.7366	15647.3	22171.5	-31.52	-2.97	600	Upper wavelength limit (600.0nm) reached --> Correction.	Step 1: 0.0 %
1961	21.7476	15637.2	22157.4	-31.57	-3.03	600	Upper wavelength limit (600.0nm) reached --> Correction.	Step 1: 0.0 %
1962	21.7587	15677.6	22214.8	-31.39	-2.78	600	Upper wavelength limit (600.0nm) reached --> Correction.	Step 1: 0.0 %
1963	21.7698	15687.9	22229.5	-31.34	-2.71	600	Upper wavelength limit (600.0nm) reached --> Correction.	Step 1: 0.0 %
1964	21.7809	15661.1	22191.7	-31.46	-2.88	600	Upper wavelength limit (600.0nm) reached --> Correction.	Step 1: 0.0 %
1965	21.792	15759.4	22331.3	-31.03	-2.27	600	Upper wavelength limit (600.0nm) reached --> Correction.	Step 1: 0.0 %
1966	21.8031	15723.1	22279.9	-31.19	-2.49	600	Upper wavelength limit (600.0nm) reached --> Correction.	Step 1: 0.0 %
1967	21.8141	15706.5	22256.6	-31.26	-2.6	600	Upper wavelength limit (600.0nm) reached --> Correction.	Step 1: 0.0 %
1968	21.8252	15684.1	22225	-31.36	-2.73	600	Upper wavelength limit (600.0nm) reached --> Correction.	Step 1: 0.0 %
1969	21.8363	15733.8	22295.6	-31.14	-2.43	600	Upper wavelength limit (600.0nm) reached --> Correction.	Step 1: 0.0 %
1970	21.8474	15751.1	22320.4	-31.07	-2.32	600	Upper wavelength limit (600.0nm) reached --> Correction.	Step 1: 0.0 %
1971	21.8585	15732.9	22294.8	-31.15	-2.43	600	Upper wavelength limit (600.0nm) reached --> Correction.	Step 1: 0.0 %
1972	21.8696	15713.3	22267.2	-31.23	-2.55	600	Upper wavelength limit (600.0nm) reached --> Correction.	Step 1: 0.0 %
1973	21.8807	15766.5	22342.7	-31	-2.22	600	Upper wavelength limit (600.0nm) reached --> Correction.	Step 1: 0.0 %
1974	21.8917	15757.7	22330.4	-31.04	-2.27	600	Upper wavelength limit (600.0nm) reached --> Correction.	Step 1: 0.0 %
1975	21.9028	15734.3	22297.4	-31.14	-2.42	600	Upper wavelength limit (600.0nm) reached --> Correction.	Step 1: 0.0 %
1976	21.9139	15773.6	22353.3	-30.97	-2.17	600	Upper wavelength limit (600.0nm) reached --> Correction.	Step 1: 0.0 %
1977	21.925	15754.1	22325.8	-31.05	-2.29	600	Upper wavelength limit (600.0nm) reached --> Correction.	Step 1: 0.0 %
1978	21.9361	15750.3	22320.6	-31.07	-2.32	600	Upper wavelength limit (600.0nm) reached --> Correction.	Step 1: 0.0 %
1979	21.9472	15805.2	22398.6	-30.83	-1.97	600	Upper wavelength limit (600.0nm) reached --> Correction.	Step 1: 0.0 %
1980	21.9582	15763.1	22339.1	-31.01	-2.24	600	Upper wavelength limit (600.0nm) reached --> Correction.	Step 1: 0.0 %
1981	21.9693	15761.5	22337	-31.02	-2.24	600	Upper wavelength limit (600.0nm) reached --> Correction.	Step 1: 0.0 %
1982	21.9804	15791.3	22379.4	-30.89	-2.06	600	Upper wavelength limit (600.0nm) reached --> Correction.	Step 1: 0.0 %
1983	21.9915	15757.2	22331.3	-31.04	-2.27	600	Upper wavelength limit (600.0nm) reached --> Correction.	Step 1: 0.0 %
1984	22.0026	15812	22409	-30.8	-1.93	600	Upper wavelength limit (600.0nm) reached --> Correction.	Step 1: 0.0 %
1985	22.0137	15775.7	22357.8	-30.96	-2.15	600	Upper wavelength limit (600.0nm) reached --> Correction.	Step 1: 0.0 %
1986	22.0247	15819.9	22420.6	-30.77	-1.88	600	Upper wavelength limit (600.0nm) reached --> Correction.	Step 1: 0.0 %
1987	22.0358	15815.8	22414.9	-30.78	-1.9	600	Upper wavelength limit (600.0nm) reached --> Correction.	Step 1: 0.0 %
1988	22.0469	15828	22432.3	-30.73	-1.83	600	Upper wavelength limit (600.0nm) reached --> Correction.	Step 1: 0.0 %
1989	22.058	15820.5	22421.9	-30.76	-1.87	600	Upper wavelength limit (600.0nm) reached --> Correction.	Step 1: 0.0 %
1990	22.0691	15795.3	22386.3	-30.87	-2.03	600	Upper wavelength limit (600.0nm) reached --> Correction.	Step 1: 0.0 %
1991	22.0802	15846.2	22458.7	-30.65	-1.71	600	Upper wavelength limit (600.0nm) reached --> Correction.	Step 1: 0.0 %
1992	22.0913	15854.5	22470.6	-30.61	-1.66	600	Upper wavelength limit (600.0nm) reached --> Correction.	Step 1: 0.0 %
1993	22.1023	15860.7	22479.6	-30.59	-1.62	600	Upper wavelength limit (600.0nm) reached --> Correction.	Step 1: 0.0 %
[truncated: 1,216 more rows]

## Sheet: Figure 6E
clamped:	Time (s)	DF/F0	Wavelength	DF/F0	Wavelength	DF/F0	Wavelength	DF/F0	Wavelength	DF/F0	Wavelength	DF/F0	Wavelength	DF/F0	Wavelength	DF/F0	Wavelength	Time (s)	Mean DF/F0	DF/F0 SEM	Mean Wavelength	Wavelength SEM		spontaneous:	Time	DF/F0	DF/F0	DF/F0	DF/F0	DF/F0	DF/F0	DF/F0	DF/F0	Mean	SEM
(aligned events)	0.01	3.032	599.6	0.482	593.2			-1.41	559.667	-1.1425	600	3.315	600	-2.274	518.8			0.01	0.33375	0.839802	578.544	11.7309		(aligned events)	0.01	-11.972				-12.73		-4.672		-9.79133	1.57319
	0.02	3.366	599.2	0.942	593.6	-7.29	600	-1.815	568	-0.91	600	3.83	600	-2.166	516.4			0.02	-0.577571	1.34249	582.457	11.0871			0.02	-10.156	-10.322			-11.694		-1.976		-8.537	1.56552
	0.0301	3.546	598.4	1.308	593.8	-6.23	600	-2.068	572.8	-0.505	600	4.2025	600	-2.05	513.6			0.0301	-0.256643	1.28316	582.657	11.3104			0.0301	-8.128	-8.9	-8.776	-12.924	-10.7	-11.4825	-1.576	2.17203	-7.53931	1.83289
	0.0401	3.8	597.4	1.852	593.8	-4.78	600	-1.766	581.6	-0.1075	600	4.04	597.2	-1.878	509.8			0.0401	0.165786	1.15022	582.829	11.6043			0.0401	-5.33	-7.518	-6.954	-10.54	-9.756	-10.802	-1.124	4.02245	-6.00019	1.82084
	0.0501	4.052	595.4	2.362	593.8	-3.66	600	-1.28	585.8	0.2225	600	4.624	598.2	-1.776	505.2	0.5445	582.45	0.0501	0.636125	1.02361	582.606	11.2909			0.0501	-2.608	-4.508	-5.242	-8.458	-8.642	-9.002	-0.192	7.01005	-3.95524	1.91743
	0.0601	4.218	592.8	2.664	593.8	-2.13	600	-0.634	588.8	-0.758	596	5.312	598	-1.73	500.2	0.7665	581.35	0.0601	0.963562	0.988975	581.369	11.7766			0.0601	-0.39	-1.442	-4.008	-6.19	-7.112	-7.048	2.006	13.6215	-1.32031	2.43666
	0.0701	4.476	588.8	2.8	594	-1.69	600	0.088	590.8	0.078	596	5.858	595.6	-1.482	494.8	1.064	579.05	0.0701	1.399	0.970378	579.881	12.3558			0.0701	2.088	1.196	-0.924	-0.536	-4.256	-1.702	8.368	22.2028	3.3046	2.99871
	0.0801	4.848	583.6	3.186	593.8	-0.95	600	1.146	591	1.526	600	6.144	589.4	-1.484	488.4	1.4055	575.95	0.0801	1.97769	0.933835	577.769	13.0794			0.0801	6.434	4.648	3.954	10.65	2.61	7.662	13.592	26.522	9.50901	2.74632
	0.0902	5.09	576.4	3.544	593.4	0.06	600	2.284	588.8	3.48	595.4	6.554	579	-1.25	481.4	1.6085	571.55	0.0902	2.67131	0.904513	573.244	13.5859			0.0902	12.924	9.014	8.506	13.52	10.396	11.31	14.422	28.6913	13.5979	2.28104
	0.1002	5.298	567	3.684	590.4	1.69	600	3.052	584	5.034	583	6.898	566.4	-1.136	473.2	1.951	566.2	0.1002	3.30888	0.888846	566.275	14.0005			0.1002	13.348	10.75	10.03	11.682	11.66	10.406	14.584	29.4375	13.9872	2.27239
	0.1102	5.542	555.8	4.026	585	1.72	600	3.446	573.8	5.672	552.2	6.92	551.8	-1.044	464	2.136	559.4	0.1102	3.55225	0.911419	555.25	14.3906			0.1102	10.78	8.972	8.594	9.734	9.914	8.836	14.086	28.7813	12.4622	2.4128
	0.1202	5.624	542.8	3.648	577.6	1.72	591	2.97	562.6	5.31	515.6	6.724	536.8	-1.146	454	2.096	551.8	0.1202	3.36825	0.897124	541.525	15.0331			0.1202	6.33	6.008	6.268	7.54	7.878	6.944	12.804	27.4549	10.1534	2.58973
	0.1302	5.582	527.6	3.388	570.2	0.79	582	2.35	552.6	1.936	481	5.404	524.2	-1.424	445	1.7705	544.1	0.1302	2.47456	0.822778	528.338	16.1869			0.1302	2.916	2.616	4.24	5.042	5.784	5.042	10.964	26.0099	7.82674	2.75255
	0.1402	4.53	513.6	2.688	563.4	-0.44	578	1.642	544.8	-3.508	465.2	3.496	516.6	-1.868	437.6	1.3045	538	0.1402	0.980562	0.96975	519.65	16.9194			0.1402	0.174	0.182	1.124	3.026	3.792	3.476	8.246	23.9855	5.50069	2.79728
	0.1503	2.316	506	2.116	558.4	-0.25	578	0.466	539.8	-7.69	461.6	1.554	520.6	-2.476	433.4	0.543	533.45	0.1503	-0.427625	1.16982	516.406	17.1207			0.1503	-2.212	-3.118	-0.828	1.35	1.66	1.758	4.544	20.573	2.96587	2.66087
	0.1603	0.294	498.8	1.41	556	-1.19	578	-0.458	537.6	-8.064	509	0.202	532.8	-2.954	431.4	-0.5465	531.4	0.1603	-1.41331	1.05063	521.875	15.6158			0.1603	-5.222	-7.322	-3.25	-0.784	-3.666	0.424	1.572	13.665	-0.572871	2.28448
	0.1703	-0.102	517.6	0.582	553.4	-1.48	582	-1.386	540.4	-8.012	569.4	-0.488	559.4	-3.432	432.4	-2.025	535	0.1703	-2.04287	0.957893	536.2	16.4607			0.1703	-11.036	-9.694	-7.006	-6.704	-11.692	-3.722	-1.102	6.03422	-5.61522	2.09477
	0.1803	-0.278	540.4	0.43	558.6	-1.6	588	-2.14	547.4	-7.964	592.4	-0.556	585.2	-3.892	435.8	-2.7705	539.45	0.1803	-2.34631	0.944137	548.406	17.8217			0.1803	-11.566	-8.692	-7.696	-11.246	-13.262	-9.168	-3.07	-1.98771	-8.33596	1.4169
	0.1903	-0.114	564.6	0.264	566.6	-1.85	593	-2.386	557.2	-7.51	600	-0.05	599	-4.212	443.2	-2.9915	548	0.1903	-2.35619	0.924641	558.95	17.9583			0.1903	-10.804	-6.986	-6.74	-11.264	-12.418	-11.092	-5.08	-6.27232	-8.83204	1.00164
	0.2004	0.352	583.4	0.34	574.8	-1.7	599	-2.306	568.6	-6.764	600	0.115	600	-4.452	452.8	-2.9935	558.15	0.2004	-2.17606	0.897531	567.094	17.2452			0.2004	-8.56	-5.17	-5.238	-9.18	-11.43	-10.204	-6.948	-8.28434	-8.12679	0.790852
	0.2104	1.052	592	-0.428	578.8	-1.49	600	-1.958	578.6	-6.184	600			-4.526	463.6	-3.05	570	0.2104	-2.36914	0.867022	569	16.9247			0.2104	-5.826	-2.07	-3.27	-6.966	-10.534	-8.732	-11.942	-9.28217	-7.32777	1.22371
	0.2204	1.56	594.2	-0.41	586	-1.53	600	-1.652	583.4	-5.368	600			-4.52	475	-3.00688	578.875	0.2204	-2.13241	0.843216	573.925	15.6904			0.2204	-3.184	0.02	-1.725	-2.186	-9.526	-5.8	-13.438	-9.02351	-5.60781	1.6513
	0.2304	0.75	600	-0.4	585.5	-1.39	600	-1.124	587	-4.706	600			-4.224	486.4	-2.76938	581.133	0.2304	-1.98048	0.70887	577.148	14.4226			0.2304	-1.074		0.125		-8.332	-1.0875	-13.152	-8.19813	-5.28644	1.89921
	0.2404			-0.17	588.5	-1.25	600	-0.4	589.6	-4.116	600			-4.008	496.2	-2.60143	585	0.2404	-2.0909	0.618325	576.55	14.0894			0.2404	-0.555				-6.776	4.27	-12.154	-6.73125	-4.38925	2.24414
	0.2504			-0.26	591.667	-1.62	600			-3.712	600			-3.96	505.2			0.2504	-2.388	0.623911	574.217	16.3266			0.2504					-3.534		-9.57	-5.32232	-6.14211	1.09615

## Sheet: Figure 6F
Amplitude			FWHM
spontaneous	clamped		spontaneous	clamped
26.704	4.22		114	93
22.28	4.5		117.5	66.1
18.05	2.81111		104	46.6667
26.24	5.93		109	72
24.53	8.79		114	88
26.37	7.03		108	81
30.6889	4.15556		168.75	133
33.1392	2.887		114.19	85.36
p-value:	1.45264e-08		p-value:	0.00782

## Sheet: Figure 6G
spontaneous	clamped
4.88889	0
3.88889	0
3.33333	0
1.27778	0
4.61111	0.05556
3.16667	0
0.77778	0
p-value:	0.000202766

## Sheet: Figure 6I
Time (s)	DF/F0 voltage signal	DF/F0 defecation contraction
0	-0.25	-2.85
0.02	-0.04	-2.075
0.05	0.18	-2.01
0.07	-0.8	-3.01
0.1	-0.39	-2.555
0.12	-0.98	-3.265
0.14	-0.64	-2.77
0.17	-0.05	-2.395
0.19	-0.4	-3.675
0.22	-0.04	-3.02
0.24	-0.4	-3.845
0.26	-0.64	-3.805
0.29	-0.29	-3.77
0.31	-0.35	-3.565
0.34	-0.61	-3.42
0.36	-0.12	-1.815
0.39	-0.2	-4.2
0.41	-0.12	-3.37
0.43	-1.16	-4.43
0.46	-0.56	-3.14
0.48	-0.69	-2.4
0.51	-0.75	-3.455
0.53	0.13	-2.815
0.55	-0.28	-3.535
0.58	-0.73	-2.63
0.6	-0.45	-2.27
0.63	-0.54	-2.76
0.65	-1.04	-2.595
0.67	-0.59	-2.965
0.7	0.4	-3.925
0.72	-0.24	-2.685
0.75	-0.03	-4.925
0.77	-0.16	-3.38
0.79	-1.01	-3.465
0.82	-0.59	-4.055
0.84	-0.24	-3.295
0.87	-0.59	-2.84
0.89	-0.78	-3.12
0.92	-0.79	-4.42
0.94	-0.4	-2.78
0.96	0.16	-3.28
0.99	-0.03	-3.2
1.01	-0.87	-4.055
1.04	-0.33	-2.125
1.06	0.16	-3.595
1.08	-0.24	-3.41
1.11	-0.26	-3.045
1.13	-0.36	-3.035
1.16	-0.42	-2.48
1.18	0.03	-3.185
1.2	-0.74	-3.075
1.23	-0.22	-2.735
1.25	-0.43	-2.595
1.28	0.04	-3.435
1.3	-0.03	-3.085
1.32	-0.03	-4.57
1.35	-0.1	-3.415
1.37	-0.12	-3.29
1.4	-0.05	-3.815
1.42	0.08	-2.19
1.45	-0.43	-2.66
1.47	0	-1.64
1.49	-0.83	-4.65
1.52	-0.25	-4.275
1.54	-0.61	-2.95
1.57	-0.35	-4.61
1.59	-0.68	-3.64
1.61	-0.79	-3.515
1.64	-0.95	-2.8
1.66	-0.82	-3.525
1.69	-0.31	-4.145
1.71	-0.38	-2.88
1.73	-0.62	-4.075
1.76	-0.46	-3.345
1.78	-1.01	-2.18
1.81	-0.53	-2.31
1.83	-0.17	-3.235
1.85	-0.77	-3.395
1.88	-0.68	-1.66
1.9	-1.05	-2.735
1.93	-0.82	-3.96
1.95	-0.75	-3.01
1.98	-0.43	-3.82
2	-0.57	-3.4
2.02	-0.74	-4.225
2.05	-0.65	-3.075
2.07	-0.16	-2.92
2.1	-0.83	-2.195
2.12	-0.92	-3.575
2.14	-1.15	-2.85
2.17	-0.28	-2.955
2.19	-0.67	-2.35
2.22	-0.36	-2.695
2.24	-0.79	-2.92
2.26	-0.35	-3.46
2.29	-0.08	-2.72
2.31	-0.62	-3.15
2.34	-0.36	-2.67
2.36	-0.15	-3.65
2.38	-0.32	-3.27
2.41	-0.11	-2.525
2.43	-0.26	-3.185
2.46	-0.23	-1.68
2.48	-0.42	-2.365
2.51	-0.03	-2.78
2.53	-0.15	-3.555
2.55	-0.41	-1.975
2.58	-0.97	-2.14
2.6	-0.52	-3.19
2.63	-0.31	-2.375
2.65	-0.31	-2.76
2.67	-0.42	-3.17
2.7	0.29	-3.465
2.72	-0.3	-2.61
2.75	-0.57	-3.335
2.77	-0.23	-2.9
2.79	-0.78	-2.575
2.82	-0.23	-3.82
2.84	-0.56	-1.915
2.87	-0.51	-2.825
2.89	-0.25	-2.355
2.91	-1.53	-2.585
2.94	-0.51	-2.21
2.96	0.3	-3.045
2.99	-0.67	-3.245
3.01	-0.54	-2.565
3.04	-0.04	-2.27
3.06	-0.27	-2.265
3.08	-1.17	-2.225
3.11	-0.4	-2.49
3.13	-0.83	-4.365
3.16	-0.06	-2.975
3.18	-0.35	-3.61
3.2	0.22	-3.125
3.23	0.29	-1.78
3.25	-0.06	-4.02
3.28	0.1	-2.44
3.3	-0.4	-3.645
3.32	0.13	-1.82
3.35	-0.1	-2
3.37	0.17	-3.105
3.4	0.49	-3.45
3.42	0.27	-3.35
3.44	0.04	-2.325
3.47	0.28	-1.91
3.49	0.48	-1.37
3.52	1.1	-2.5
3.54	0.92	-3.55
3.57	0.54	-3.08
3.59	0.47	-2.245
3.61	0.03	-3.26
3.64	0.45	-3.435
3.66	0.85	-2.225
3.69	0.15	-1.91
3.71	0.94	-4.21
3.73	0.21	-2.93
3.76	0.83	-2.835
3.78	0.59	-2.865
3.81	0.73	-3.87
3.83	0.98	-3.305
3.85	1.15	-3.545
3.88	0.72	-2.975
3.9	1.4	-4.4
3.93	1.57	-2.96
3.95	2.47	-3.43
3.97	3.66	-4.475
4	4.83	-3.725
4.02	5.07	-2.85
4.05	6.36	-2.21
4.07	6	-3.46
4.1	6.03	-2.59
4.12	5.62	-3.455
4.14	7.09	-3.295
4.17	6.89	-3.47
4.19	7.56	-3.94
4.22	6.94	-3.35
4.24	7.55	-2.485
4.26	7.36	-3.735
4.29	7.11	-4.04
4.31	7.2	-3.485
4.34	7.79	-3.36
4.36	8.4	-3.015
4.38	8.49	-1.965
4.41	8.38	-2.665
4.43	8.75	-2.69
4.46	8.86	-1.92
4.48	8.17	-3.625
4.5	7.18	-2.11
4.53	7.5	-2.37
4.55	7.32	-0.32
4.58	7.35	-2.855
4.6	5.48	-2.85
4.63	3.6	-2.12
4.65	2	-3.86
4.67	0.72	-1.855
4.7	0.68	-2.655
4.72	0.46	-3.325
4.75	0.47	-3.585
4.77	-0.44	-3.87
4.79	-1.22	-5.2
4.82	-1.08	-3.595
4.84	-1.41	-5.96
4.87	-2.15	-6.26
4.89	-1.55	-6.945
4.91	-1.04	-6.63
4.94	-0.91	-6.27
4.96	-0.11	-5.32
4.99	-0.45	-6.09
5.01	-0.44	-5.955
5.03	-0.18	-6.7
5.06	-0.26	-5.685
5.08	0.41	-5.36
5.11	-0.32	-5.255
5.13	-0.87	-3.665
5.16	-0.46	-3.005
5.18	-0.82	-2.44
5.2	-0.43	-1.835
5.23	-0.61	-1.66
5.25	-0.39	-1.985
5.28	-0.43	-2.37
5.3	-0.13	-2.115
5.32	-0.29	-0.37
5.35	-0.26	-1.35
5.37	-0.36	-1.19
5.4	-0.39	-2.745
5.42	-0.95	-1.14
5.44	-0.59	-2.215
5.47	-0.45	-2.405
5.49	-0.8	-2.955
5.52	-0.67	-2.56
5.54	-0.33	-2.9
5.56	-1.11	-2.975
5.59	-1.34	-1.635
5.61	-0.57	-1.905
5.64	-1.17	-1.355
5.66	-0.36	-3.565
5.69	-0.9	-1.275
5.71	-0.18	-2.47
5.73	-0.78	-1.695
5.76	-0.94	-2.685
5.78	-0.3	-1.74
5.81	-0.4	-2.69
5.83	-0.07	-3.265
5.85	-0.32	-2.1
5.88	0.41	-2.14
5.9	0.49	-2.665
5.93	0.32	-2.66
5.95	-0.02	-2.09
5.97	0.19	-2.095
6	-0.33	-3.335
6.02	0.23	-2.995
6.05	0.01	-2.705
6.07	-0.09	-4.31
6.09	0.05	-2.455
6.12	0.02	-3.04
6.14	-0.52	-3.31
6.17	-0.5	-2.735
6.19	0.12	-1.395
6.22	-0.22	-1.44
6.24	0.1	-2.205
6.26	0.54	-2.67
6.29	-0.36	-2.43
6.31	-0.37	-2.625
6.34	0.01	-2.2
6.36	-0.49	-2.325
6.38	-0.66	-2.71
6.41	-0.51	-2.66
6.43	-0.27	-3.575
6.46	-0.45	-2.85
6.48	-0.15	-3.245
6.5	0.23	-2.55
6.53	0.19	-1.81
6.55	0.02	-3.06
6.58	0.24	-2.11
6.6	-0.24	-1.62
6.62	-0.34	-2.075
6.65	-0.2	-2.935
6.67	-0.01	-2.36
6.7	-0.03	-2.81
6.72	-0.09	-2.175
6.75	-0.21	-1.38
6.77	0.27	-2.855
6.79	-0.1	-2.215
6.82	-0.06	-2.18
6.84	0.08	-2.975
6.87	-0.25	-3.095
6.89	0.33	-2.29
6.91	-0.05	-2.22
6.94	-0.52	-3.23
6.96	-0.38	-1.48
6.99	-0.26	-1.935
7.01	-0.21	-1.585
7.03	-0.3	-1.455
7.06	-1.1	-2.575
7.08	-0.7	-4.26
7.11	-0.62	-3.15
7.13	-0.06	-2.24
7.15	-0.42	-2.895
7.18	-0.69	-0.84
7.2	-0.43	-3.25
7.23	-0.3	-2.09
7.25	-0.25	-2.695
7.28	-0.38	-2.265
7.3	0.83	-3.35
7.32	-0.15	-2.16
7.35	-0.1	-1.785
7.37	0.18	-2.745
7.4	0.09	-1.82
7.42	-0.24	-2.92
7.44	-0.46	-3.875
7.47	-0.14	-3.685
7.49	0.2	-2.65
7.52	-0.43	-2.19
7.54	-0.18	-2.685
7.56	-0.01	-2.245
7.59	-0.55	-2.615
7.61	0.2	-2.6
7.64	-0.15	-2.24
7.66	-0.32	-3.205
7.68	-0.21	-2.74
7.71	-0.41	-2.915
7.73	0.15	-2.705
7.76	0.53	-3.035
7.78	0.29	-3.385
7.81	0.68	-2.52
7.83	-0.16	-2.335
7.85	0.19	-2.745
7.88	0.01	-2.495
7.9	0.04	-4.425
7.93	0.12	-2.27
7.95	-0.08	-3.76
7.97	-0.14	-1.85
8	0.54	-2.89
8.02	0.41	-2.645
8.05	0.11	-2.68
8.07	0	-2.425
8.09	0.2	-3.755
8.12	0.44	-1.6
8.14	0.47	-3.17
8.17	0.06	-3.295
8.19	0.44	-2.605
8.21	0.15	-2.16
8.24	-0.01	-1.43
8.26	0.66	-3.15
8.29	0.27	-2.61
8.31	-0.06	-3.915
8.34	0.78	-3.5
8.36	-0.4	-2.525
8.38	0.18	-3.405
8.41	0.06	-2.085
8.43	1	-1.42
8.46	0.54	-2.58
8.48	0.19	-2.29
8.5	-0.13	-2.19
8.53	-0.53	-2.575
8.55	-0.01	-2.52
8.58	-0.34	-3.065
8.6	-0.23	-2.225
8.62	-0.15	-2.39
8.65	-0.21	-2.28
8.67	-0.15	-2.3
8.7	-0.05	-4.2
8.72	0.65	-2.505
8.74	0.6	-1.935
8.77	-0.25	-2.36
8.79	0.56	-3.33
8.82	0.45	-0.82
8.84	0.57	-3.31
8.87	0.58	-2.105
8.89	0.27	-2.895
8.91	-0.53	-2.34
8.94	-0.21	-2.5
8.96	-0.01	-0.36
8.99	0.24	-1.485
9.01	-0.13	-2.905
9.03	0.21	-1.57
9.06	0.4	-1.625
9.08	0.46	-0.985
9.11	0.57	-1.73
9.13	-0.01	-2.23
9.15	0.22	-2.4
9.18	0.05	-1
9.2	0.81	-2.53
9.23	-0.09	-1.9
9.25	0.49	-3.39
9.27	0.54	-3.375
9.3	0.89	-2.745
9.32	0.45	-2.805
9.35	0.41	-1.69
9.37	0.5	-3.64
9.4	0.19	-3.25
9.42	-0.17	-3.67
9.44	0.59	-1.15
9.47	-0.25	-3.035
9.49	0.05	-2.85
9.52	0.48	-4.22
9.54	0.5	-2.64
9.56	0.69	-3.405
9.59	0.17	-3
9.61	0.71	-3.94
9.64	-0.24	-3.42
9.66	-0.03	-2.525
9.68	-0.16	-2.975
9.71	0.18	-3.325
9.73	0.45	-2.67
9.76	-0.26	-3.41
9.78	0.07	-2.62
9.8	-0.12	-2.4
9.83	0.38	-2.835
9.85	0.25	-3.92
9.88	0.06	-3.69
9.9	0.25	-2.955
9.93	0.25	-2.45
9.95	0.1	-2.68
9.97	0.58	-1.75
10	0.57	-2.36
10.02	0.18	-4.235
10.05	-0.1	-2.59
10.07	0.34	-3.34
10.09	0.32	-3.345
10.12	0.27	-1.765
10.14	0.35	-2.36
10.17	0.64	-2.37
10.19	0.13	-3.89
10.21	0.78	-2.47
10.24	-0.26	-3.75
10.26	0.43	-2.845
10.29	0.24	-3.17
10.31	0.28	-3.015
10.33	0.4	-3.345
10.36	0.44	-3.675
10.38	0.38	-3.64
10.41	0.27	-3.885
10.43	0.32	-3.395
10.46	0.68	-3.485
10.48	-0.13	-4.57
10.5	-0.44	-3.46
10.53	0.2	-3.27
10.55	-0.17	-3.94
10.58	0.42	-2.84
10.6	0.38	-3.035
10.62	0.84	-3.99
10.65	-0.83	-3.24
10.67	-0.11	-2.585
10.7	-0.2	-4.245
10.72	-0.1	-2.95
10.74	-0.28	-2.46
10.77	0.2	-3.61
10.79	0.66	-2.02
10.82	-0.09	-3.36
10.84	0.97	-1.445
10.86	0.25	-3.48
10.89	1.15	-1.4
10.91	0.27	-1.875
10.94	0.76	-3.39
10.96	0.23	-2.57
10.99	-0.05	-2.84
11.01	0.16	-3.11
11.03	-0.21	-1.74
11.06	0.31	-2.235
11.08	-0.18	-1.845
11.11	0.61	-3.64
11.13	-0.02	-3.12
11.15	0.03	-3.815
11.18	0.3	-2.49
11.2	-0.14	-2.865
11.23	0.56	-2.54
11.25	0.88	-2.6
11.27	0	-2.345
11.3	-0.02	-3.31
11.32	0.28	-3.03
11.35	0.5	-3.11
11.37	0.46	-2.02
11.39	0.42	-2.655
11.42	0.07	-2.06
11.44	0	-4.605
11.47	-0.14	-2.66
11.49	-0.18	-3.2
11.52	0.23	-3.4
11.54	0.48	-1.83
11.56	-0.2	-3.365
11.59	0.1	-3.355
11.61	0.13	-3.165
11.64	0.4	-1.97
11.66	0.18	-2.995
11.68	-0.53	-2.55
11.71	-0.13	-3.38
11.73	0.27	-3.145
11.76	0.26	-3.17
11.78	0.07	-1.655
11.8	0.61	-4.05
11.83	-0.27	-2.275
11.85	0.31	-3.255
11.88	-0.26	-2.73
11.9	-0.18	-3.215
11.92	0.25	-3.18
11.95	0.09	-4.385
11.97	0.4	-2.275
12	0.48	-3.85
12.02	0.42	-3.245
12.05	-0.17	-1.865
12.07	0.39	-4.315
12.09	-0.21	-3.99
12.12	-0.01	-3.105
12.14	-0.15	-1.94
12.17	0.07	-3.07
12.19	0.75	-2.87
12.21	0.27	-1.505
12.24	0.01	-1.735
12.26	0.38	-3.42
12.29	0.43	-1.655
12.31	0.18	-2.295
12.33	0.4	-2.265
12.36	0.2	-3.615
12.38	0.65	-3.405
12.41	0.51	-2.59
12.43	0.25	-2.545
12.45	0.03	-3.6
12.48	0.87	-1.685
12.5	0.85	-2.76
12.53	0.16	-3.56
12.55	0.17	-3.545
12.58	0.08	-2.71
12.6	0.72	-2.095
12.62	0.39	-3.04
12.65	0.18	-2.245
12.67	0.22	-2.775
12.7	-0.24	-3.49
12.72	0.13	-2.345
12.74	0.01	-3.355
12.77	0.22	-3.075
12.79	0.68	-3.8
12.82	0.45	-3.05
12.84	0.79	-2.405
12.86	0.93	-1.035
12.89	-0.11	-4.32
12.91	-0.33	-2.42
12.94	0.44	-2.9
12.96	0.12	-2.785
12.98	0.45	-2.63
13.01	0.57	-4.15
13.03	0.16	-2.945
13.06	0.33	-2.855
13.08	0.71	-1.71
13.11	0.44	-2.415
13.13	-0.16	-3.41
13.15	0.28	-2.895
13.18	0.36	-3.53
13.2	0.69	-3.93
13.23	0.25	-2.715
13.25	1	-2.88
13.27	0.3	-1.65
13.3	0.44	-2.39
13.32	1.02	-3.53
13.35	0.14	-1.98
13.37	0.53	-2.865
13.39	1	-2.745
13.42	0.94	-3.325
13.44	0.95	-3.13
13.47	0.47	-2.38
13.49	0.1	-2.09
13.51	0.44	-3.99
13.54	0.37	-2.965
13.56	0.14	-4.16
13.59	0.55	-1.975
13.61	-0.02	-3.09
13.64	0.69	-2.35
13.66	0.03	-1.335
13.68	1.17	-2.25
13.71	0.38	-1.44
13.73	0.23	-3.045
13.76	0.5	-3.16
13.78	0.58	-2.61
13.8	-0.09	-3.73
13.83	0.29	-3.48
13.85	-0.08	-2.365
13.88	0.56	-2.65
13.9	0.49	-2.415
13.92	0.45	-0.98
13.95	1.17	-1.525
13.97	0.33	-1.835
14	1.05	-0.66
14.02	0.63	-2.615
14.04	0.14	-3.17
14.07	0.81	-4.46
14.09	0.32	-3.24
14.12	0.02	-2.865
14.14	0.44	-2.51
14.17	0.17	-4.645
14.19	0.46	-2.83
14.21	0.07	-3.285
14.24	0.49	-3.335
14.26	-0.12	-3.46
14.29	0.17	-3.365
14.31	0.61	-3.695
14.33	-0.13	-2.885
14.36	0.66	-3.995
14.38	-0.11	-2.64
14.41	0.66	-3.04
14.43	0.14	-2.88
14.45	0.12	-5.3
14.48	0.15	-3.635
14.5	0.82	-3.11
14.53	0.17	-1.94
14.55	0.25	-3.63
14.57	0.62	-3.02
14.6	0.93	-2.92
14.62	0.33	-3.145
14.65	0.14	-2.775
14.67	0.33	-1.47
14.7	0.25	-3.12
14.72	0.5	-2.835
14.74	0.7	-3
14.77	0.21	-2.65
14.79	0.48	-1.94
14.82	-0.78	-1.795
14.84	0.3	-2.825
14.86	0.85	-2.31
14.89	0.45	-2.4
14.91	0.09	-2.66
14.94	0.43	-3.145
14.96	0.11	-3.57
14.98	0.07	-3.22
15.01	0.48	-3.49
15.03	0.23	-1.515
15.06	0.56	-3.64
15.08	0.87	-2.365
15.1	0.07	-2.77
15.13	0.7	-3.075
15.15	0.31	-3.535
15.18	-0.06	-2.58
15.2	0.11	-4.64
15.23	0.81	-1.395
15.25	0.05	-2.945
15.27	0.78	-2.09
15.3	0.71	-3.78
15.32	0.13	-2.375
15.35	0.99	-1.665
15.37	-0.05	-3.56
15.39	0.25	-2.6
15.42	0.35	-2.615
15.44	0.47	-3.095
15.47	0.25	-3.285
15.49	0.85	-3.03
15.51	0.48	-2.7
15.54	-0.24	-3.58
15.56	1.21	-1.94
15.59	0.01	-1.93
15.61	0.02	-1.505
15.63	0.24	-1.555
15.66	0.15	-2.815
15.68	0.4	-3.305
15.71	0.44	-3.11
15.73	0.13	-3.035
15.75	0.05	-2.195
15.78	0.31	-2.445
15.8	-0.08	-2.705
15.83	0.15	-4.88
15.85	0.14	-3.385
15.88	0.56	-2.75
15.9	0.32	-2.415
15.92	-0.23	-1.375
15.95	0.59	-3.745
15.97	0.41	-2.94
16	0.73	-2.495
16.02	0.72	-3.305
16.04	0.89	-2.92
16.07	0.31	-5.65
16.09	0.44	-2.57
16.12	0.06	-2.885
16.14	0.42	-3.315
16.16	0.14	-1.74
16.19	0.59	-2.78
16.21	0.68	-3.56
16.24	0.36	-2.395
16.26	0.36	-2.775
16.28	0.64	-4.335
16.31	1.2	-3.535
16.33	-0.02	-3.245
16.36	0.66	-3.105
16.38	0.64	-3.685
16.41	0.6	-2.52
16.43	0.32	-3.065
16.45	-0.07	-2.89
16.48	0.53	-3.44
16.5	0.64	-4.075
16.53	0.42	-2.6
16.55	0.79	-2.56
16.57	0.18	-3.275
16.6	0.7	-3.795
16.62	0.43	-2.185
16.65	-0.22	-2.14
16.67	0.38	-2.16
16.69	0.64	-2.78
16.72	0.33	-2.19
16.74	0.36	-2.945
16.77	0.01	-3.115
16.79	0.23	-3.745
16.81	0.58	-4.75
16.84	0.94	-2.11
16.86	0.41	-3.425
16.89	0.4	-1.93
16.91	0.4	-1.685
16.94	0.78	-4.065
16.96	0.34	-1.965
16.98	0.95	-2.72
17.01	0.62	-3.28
17.03	0	-3.695
17.06	0.72	-2.99
17.08	0.09	-2.555
17.1	0.94	-3.825
17.13	0.4	-3.58
17.15	0.05	-3.17
17.18	0.12	-3.43
17.2	0.43	-2.87
17.22	0.69	-3.38
17.25	1.15	-3.215
17.27	0.1	-3.405
17.3	0.41	-3.015
17.32	0.3	-1.12
17.34	0.27	-1.695
17.37	0.6	-2.39
17.39	0.11	-4.045
17.42	0.43	-3.21
17.44	0.53	-2.685
17.47	-0.05	-3.96
17.49	0.77	-3.215
17.51	0.74	-3.61
17.54	0.88	-3.87
17.56	0.09	-3.06
17.59	0.15	-3.53
17.61	0.72	-3.5
17.63	-0.06	-3.695
17.66	0.57	-3.86
17.68	0.51	-3.87
17.71	-0.05	-3.375
17.73	0.06	-2.145
17.75	0.3	-3.55
17.78	0.32	-3.14
17.8	0.42	-2.66
17.83	0.73	-3.785
17.85	0.38	-2.8
17.87	0.55	-4.275
17.9	0.66	-2.735
17.92	1.19	-3.98
17.95	0.86	-5.43
17.97	0.9	-1.995
18	0.24	-2.385
18.02	1.1	-3.215
18.04	0	-3.385
18.07	0.37	-2.79
18.09	0.02	-2.38
18.12	0.32	-3.465
18.14	0	-2.745
18.16	0.23	-1.515
18.19	-0.24	-3.065
18.21	0.44	-4.57
18.24	-0.19	-2.86
18.26	0.37	-1.695
18.28	0.09	-1.53
18.31	-0.41	-3.675
18.33	0.66	-5.565
18.36	-0.07	-3.41
18.38	-0.14	-3.885
18.4	0.04	-3.25
18.43	0.4	-1.435
18.45	-0.47	-3.285
18.48	0.39	-2.64
18.5	0	-3.515
18.53	-0.55	-5.035
18.55	0.01	-2.58
18.57	0.33	-2.24
18.6	-0.26	-3.06
18.62	0.24	-2.84
18.65	0.28	-3.43
18.67	0.24	-2.695
18.69	0.55	-5.22
18.72	0.4	-3.26
18.74	-0.51	-3.235
18.77	0.42	-2.585
18.79	0.31	-2.625
18.81	0.13	-4.905
18.84	0.07	-3.53
18.86	0.26	-3.075
18.89	0.34	-2.655
18.91	0.6	-3.695
18.93	0.13	-2.75
18.96	-0.15	-4.23
18.98	0.18	-3.305
19.01	-0.43	-3.825
19.03	0.41	-3.19
19.06	0.09	-3.45
19.08	0.1	-3.075
19.1	-0.39	-3.495
19.13	0.19	-3.14
19.15	0.13	-4.61
19.18	0.29	-2.66
19.2	-0.33	-3.88
19.22	0.08	-3.9
19.25	0.67	-2.93
19.27	1.23	-3.12
19.3	0.28	-3.08
19.32	0.96	-3.12
19.34	0.93	-3.335
19.37	0.29	-2.585
19.39	0.29	-1.46
19.42	-0.06	-2.505
19.44	0.48	-3.25
19.46	0.47	-3.03
19.49	0.65	-3.285
19.51	0.41	-3.4
19.54	0.83	-2.835
19.56	0.73	-2.825
19.59	0.28	-4.185
19.61	0.99	-3.76
19.63	0.92	-2.49
19.66	0.77	-2.625
19.68	0.36	-3.8
19.71	0.27	-2.75
19.73	0.68	-4.105
19.75	0.65	-3.215
19.78	0.07	-3.205
19.8	0.09	-3.775
19.83	0.9	-3.3
19.85	0.14	-3.295
19.87	-0.02	-3.175
19.9	0.4	-4.44
19.92	0.21	-3.505
19.95	-0.12	-5.16
19.97	0.17	-1.975
19.99	0.2	-3.345
20.02	-0.36	-3.39
20.04	0.11	-4.17
20.07	-0.46	-3.785
20.09	0.2	-2.925
20.12	-0.01	-2.01
20.14	0.67	-2.66
20.16	-0.06	-3.69
20.19	0.04	-2.85
20.21	-0.04	-2.415
20.24	0.37	-2.14
20.26	0.48	-3.125
20.28	0.51	-2.55
20.31	-0.14	-2.55
20.33	-0.15	-3.27
20.36	-0.23	-3.495
20.38	-0.04	-2.83
20.4	-0.33	-2.855
20.43	-0.36	-3.205
20.45	0.14	-4.445
20.48	0.48	-3.045
20.5	0.22	-2.645
20.52	-0.17	-2.455
20.55	0.07	-4.18
20.57	0.29	-3.315
20.6	-0.05	-3.925
20.62	0.08	-3.515
20.65	0.11	-2.95
20.67	-0.42	-3.565
20.69	-0.33	-3.98
20.72	-0.44	-3.58
20.74	-0.5	-2.865
20.77	-0.07	-3.255
20.79	-0.26	-2.795
20.81	-0.27	-3.345
20.84	-0.13	-2.665
20.86	-0.3	-3.01
20.89	0.1	-2.94
20.91	-0.17	-3.855
20.93	-0.18	-4.155
20.96	-0.6	-3.29
20.98	0.04	-3.98
21.01	0.1	-1.985
21.03	0.08	-3.105
21.05	-0.57	-3.465
21.08	-0.91	-2.72
21.1	0.2	-2.215
21.13	0.22	-4.485
21.15	0.11	-2.65
21.18	0.15	-1.43
21.2	-0.17	-2.89
21.22	0.23	-2.97
21.25	-0.65	-3.165
21.27	0.08	-2.125
21.3	-0.63	-2.125
21.32	0.11	-2.92
21.34	0.11	-2.885
21.37	-0.13	-2.4
21.39	-0.64	-3.3
21.42	-0.26	-3.275
21.44	0.05	-3.04
21.46	-0.27	-2.07
21.49	-0.4	-3.625
21.51	-0.1	-3.21
21.54	0.04	-3.85
21.56	-0.27	-2.925
21.58	0.18	-3.83
21.61	-0.7	-3.635
21.63	0.18	-3.33
21.66	0.06	-2.64
21.68	0.25	-3.56
21.71	-0.28	-3.04
21.73	0.13	-3.74
21.75	0.8	-4.385
21.78	-0.44	-2.655
21.8	-0.48	-2.965
21.83	-0.06	-3.155
21.85	0.04	-3.415
21.87	-0.01	-3.41
21.9	-0.39	-3.035
21.92	-0.22	-3.94
21.95	0.32	-4.145
21.97	-0.35	-3.125
21.99	-0.63	-3.095
22.02	-0.52	-3.99
22.04	-0.44	-3.895
22.07	0.03	-3.075
22.09	-0.89	-3.32
22.11	-0.35	-2.25
22.14	-0.06	-1.085
22.16	-0.25	-2.21
22.19	0.02	-3.36
22.21	0.27	-2.445
22.24	0.32	-2.42
22.26	-0.4	-2.835
22.28	0.22	-2.475
22.31	-0.44	-2.6
22.33	-0.53	-3.34
22.36	-0.48	-2.5
22.38	-0.17	-2.55
22.4	-0.63	-2.875
22.43	0.08	-1.8
22.45	-0.23	-4.11
22.48	-0.05	-2.52
22.5	-0.69	-3.71
22.52	-0.7	-3.54
22.55	0.27	-2.74
22.57	-0.34	-3.535
22.6	-0.31	-4.285
22.62	0.25	-3.085
22.64	-0.17	-3.435
22.67	0.23	-4.015
22.69	0.25	-4.295
22.72	-0.3	-4.11
22.74	-0.99	-3.35
22.77	-0.02	-3.16
22.79	-0.19	-3.195
22.81	-0.3	-4
22.84	-0.23	-4.125
22.86	-0.28	-3.07
22.89	-0.05	-4.53
22.91	-0.5	-3.365
22.93	-0.24	-3.13
22.96	0.19	-3.655
22.98	-0.55	-2.015
23.01	0.53	-2.885
23.03	0.03	-3.135
23.05	-0.09	-2.765
23.08	0.18	-3.795
23.1	0.15	-3.175
23.13	-0.02	-2.78
23.15	0.1	-3.865
23.17	0	-3.16
23.2	0.05	-3.355
23.22	-0.29	-3.995
23.25	0.06	-4.615
23.27	0.04	-3.165
23.3	0.27	-4.51
23.32	-0.27	-3.41
23.34	-0.05	-3.235
23.37	-0.71	-4.46
23.39	-0.21	-3.215
23.42	-0.36	-3.805
23.44	-0.43	-4.45
23.46	-0.18	-4.48
23.49	-0.47	-4.31
23.51	-0.14	-3.65
23.54	-0.34	-4.395
23.56	-0.09	-4.855
23.58	-0.07	-3.87
23.61	-0.38	-3.935
23.63	0.4	-4.15
23.66	-0.69	-2.555
23.68	-0.11	-4.535
23.7	0.2	-5.555
23.73	-0.49	-3.395
23.75	-0.18	-3.755
23.78	-0.06	-3.76
23.8	-0.32	-4.155
23.83	-0.02	-3.67
23.85	-0.12	-4.935
23.87	-0.38	-3.94
23.9	-0.03	-4.015
23.92	-0.21	-3.675
23.95	-0.08	-4.18
23.97	-0.35	-4.84
23.99	-0.54	-4.69
24.02	-0.67	-4.565
24.04	-0.42	-3.365
24.07	-0.63	-3.445
24.09	-0.02	-3.99
24.11	0.02	-3.985
24.14	-0.16	-3.895
24.16	-0.56	-4.645
24.19	-0.65	-4.905
24.21	-0.69	-4.175
24.23	-0.26	-3.08
24.26	-0.48	-4.115
24.28	-0.47	-3.835
24.31	-0.08	-5.075
24.33	-0.75	-2.005
24.36	-0.21	-4.355
24.38	-0.46	-4.415
24.4	-0.6	-3.645
24.43	-0.65	-3.7
24.45	-0.46	-3.105
24.48	-0.42	-3.77
24.5	-0.36	-4.145
24.52	0.27	-4.52
24.55	0.03	-3.3
24.57	-0.33	-3.73
24.6	-0.29	-3.645
24.62	-0.77	-3.995
24.64	-0.58	-3.23
24.67	-0.73	-4.81
24.69	0.08	-1.945
24.72	-0.41	-2.605
24.74	-0.13	-3.925
24.76	-0.09	-4.645
24.79	-0.14	-4.525
24.81	0.1	-3.335
24.84	0.11	-4.24
24.86	0.2	-3.39
24.89	-0.7	-4.78
24.91	-0.67	-5.02
24.93	-0.39	-3.9
24.96	0.05	-5.46
24.98	0.19	-4.04
25.01	0.05	-4.855
25.03	-0.07	-4.14
25.05	-0.29	-5.1
25.08	-0.26	-3.41
25.1	-0.13	-3.565
25.13	-0.11	-4.62
25.15	-0.7	-4.88
25.17	-0.18	-5.25
25.2	-0.53	-4.125
25.22	-0.63	-2.51
25.25	0.04	-4.68
25.27	-0.41	-3.135
25.29	-0.49	-3.795
25.32	-0.02	-3.655
25.34	-0.61	-3.155
25.37	-0.61	-2.625
25.39	0.04	-4.46
25.42	-0.17	-3.455
25.44	-0.24	-2.76
25.46	-0.37	-2.31
25.49	-0.99	-4.13
25.51	-0.14	-4.185
25.54	-0.17	-2.56
25.56	-0.27	-2.925
25.58	-0.5	-3.89
25.61	-0.61	-3.04
25.63	-0.76	-1.62
25.66	-0.42	-3.685
25.68	-0.25	-2.98
25.7	-0.12	-4.57
25.73	-0.01	-2.435
25.75	-0.44	-2.67
25.78	-0.12	-2.855
25.8	0.12	-3.375
25.82	-0.75	-2.815
25.85	-0.78	-3.79
25.87	-0.77	-3.28
25.9	-0.9	-3.145
25.92	-0.7	-3.345
25.95	-0.71	-4.1
25.97	-0.35	-3.705
25.99	-0.54	-4.255
26.02	-0.71	-3.315
26.04	-0.88	-3.115
26.07	-1.21	-3.47
26.09	-0.96	-4.2
26.11	-0.8	-3.995
26.14	-0.32	-4.405
26.16	-0.07	-3.65
26.19	-0.37	-4.27
26.21	0.03	-2.29
26.23	-0.26	-3.79
26.26	0.24	-3.255
26.28	-0.03	-4.58
26.31	-0.38	-3.165
26.33	-0.34	-3.135
26.35	-0.26	-2.705
26.38	-0.29	-4.605
26.4	-0.39	-3.19
26.43	-0.8	-3.635
26.45	0.02	-1.895
26.48	-0.75	-3.97
26.5	-0.78	-2.61
26.52	-0.32	-4.005
26.55	-0.99	-3.4
26.57	-0.73	-3.835
26.6	-0.98	-2.255
26.62	-0.79	-3.73
26.64	-0.24	-4.435
26.67	-0.72	-4.165
26.69	-0.98	-3.125
26.72	-0.75	-4.04
26.74	-0.66	-3.845
26.76	-1.04	-4.165
26.79	-0.71	-3.25
26.81	-0.88	-3.04
26.84	-1.19	-4.14
26.86	-0.54	-3.865
26.88	-0.75	-3.715
26.91	-1.64	-4.87
26.93	-0.5	-4.23
26.96	-1.29	-3.1
26.98	-0.79	-3.54
27.01	-0.29	-3.21
27.03	-0.63	-3.535
27.05	-0.75	-3.245
27.08	-0.54	-3.73
27.1	-0.02	-3.195
27.13	-1.06	-3.21
27.15	-0.25	-4.525
27.17	-0.4	-3.35
27.2	-0.6	-3.39
27.22	-0.31	-3.68
27.25	-0.47	-3.595
27.27	0.18	-3.145
27.29	-0.58	-3.565
27.32	-0.32	-3.19
27.34	-0.57	-3.905
27.37	-0.74	-3.375
27.39	-0.42	-4.31
27.41	-0.69	-3.845
27.44	-0.2	-4.49
27.46	-1.22	-4.25
27.49	-0.86	-2.975
27.51	-0.62	-3.36
27.54	-0.73	-2.84
27.56	-1.06	-4.43
27.58	-0.61	-5.66
27.61	-1.2	-4.04
27.63	-0.12	-3.565
27.66	-0.96	-4.98
27.68	-1.33	-3.57
27.7	-1.22	-3.725
27.73	-0.22	-2.735
27.75	-0.67	-3.23
27.78	-0.92	-2.475
27.8	-1.09	-3.095
27.82	-0.53	-2.82
27.85	-0.61	-4.345
27.87	-1.14	-3.715
27.9	-0.38	-4.86
27.92	-0.58	-4.29
27.94	-0.85	-4.275
27.97	-0.86	-3.19
27.99	-0.92	-4.64
28.02	-0.74	-3.425
28.04	-0.85	-2.97
28.07	-0.8	-4.62
28.09	-0.27	-3.795
28.11	-1.04	-3.505
28.14	-0.87	-4.175
28.16	-0.92	-4.595
28.19	-0.38	-3.19
28.21	-1.24	-4.795
28.23	-0.27	-2.375
28.26	-0.6	-3.945
28.28	0.02	-3.115
28.31	-0.77	-3.55
28.33	-0.91	-4.57
28.35	-1.56	-4.325
28.38	-0.67	-3.25
28.4	-0.64	-3.835
28.43	-0.65	-2.925
28.45	-1.32	-3.1
28.47	-1.24	-3.22
28.5	-0.54	-4.19
28.52	-0.04	-3.705
28.55	-0.4	-1.82
28.57	-0.08	-3.1
28.6	-0.56	-3.405
28.62	-0.28	-2.625
28.64	-0.82	-2.945
28.67	0.05	-3.86
28.69	-0.42	-4.38
28.72	-0.16	-3.17
28.74	0.47	-3.82
28.76	-0.52	-4.21
28.79	-0.35	-3.41
28.81	-0.4	-3.3
28.84	-0.33	-2.91
28.86	-0.39	-2.88
28.88	-0.01	-3.94
28.91	-0.01	-3.755
28.93	-0.25	-2.585
28.96	-0.58	-3.27
28.98	-1.01	-3.085
29	-0.47	-3.335
29.03	0.13	-2.905
29.05	-0.39	-3.53
29.08	-0.24	-2.855
29.1	0.09	-3.245
29.13	-0.23	-3.2
29.15	0.31	-2.7
29.17	-0.31	-1.96
29.2	-0.04	-2.225
29.22	-0.15	-3.185
29.25	-0.25	-3.295
29.27	0.11	-1.84
29.29	-0.58	-3.005
29.32	-0.91	-3.15
29.34	-0.84	-4.58
29.37	0.16	-2.815
29.39	-0.43	-4.175
29.41	0.05	-3.775
29.44	0.43	-1.885
29.46	-0.26	-3.685
29.49	-0.43	-2.97
29.51	-0.9	-4.255
29.53	-0.42	-2.195
29.56	-0.56	-2.61
29.58	0.15	-2.6
29.61	-0.79	-1.855
29.63	-0.27	-3.82
29.66	-0.19	-3.415
29.68	-0.73	-3.83
29.7	0.11	-3.29
29.73	-0.33	-3.81
29.75	-0.63	-3.29
29.78	-0.84	-4.35
29.8	-0.65	-3.255
29.82	-0.44	-1.94
29.85	0.48	-2.955
29.87	0.05	-3.88
29.9	-0.57	-3.51
29.92	-0.76	-4
29.94	0.03	-4.695
29.97	0.27	-4.67
29.99	-0.16	-2.87
30.02	0.08	-2.625
30.04	-0.55	-3.5
30.06	-0.1	-4.36
30.09	-0.36	-3.79
30.11	-1.17	-3.2
30.14	-0.76	-4.84
30.16	-0.19	-2.94
30.19	0.05	-4.14
30.21	-0.07	-3.665
30.23	-0.32	-3.675
30.26	-0.33	-4.36
30.28	0.48	-3.085
30.31	-0.32	-4.58
30.33	0.27	-3.795
30.35	-0.11	-4.22
30.38	0.28	-3.695
30.4	0.16	-4.475
30.43	0.16	-3.575
30.45	0.34	-4.275
30.47	-0.75	-2.615
30.5	0.43	-3.41
30.52	-0.04	-4.07
30.55	0.31	-3.025
30.57	-0.18	-4.27
30.59	0	-3.635
30.62	0.34	-3.05
30.64	0.13	-4.03
30.67	-0.32	-3.38
30.69	0.27	-3.73
30.72	0.14	-3.01
30.74	-0.71	-3.395
30.76	0.31	-3.36
30.79	0.42	-3.73
30.81	-0.23	-3.825
30.84	0.83	-4.305
30.86	0.55	-2.835
30.88	0.01	-3.92
30.91	0.3	-2.17
30.93	0.13	-3.54
30.96	0.06	-2.345
30.98	0.21	-3.78
31	0.48	-3.025
31.03	0.28	-3.845
31.05	0.49	-4.095
31.08	0.42	-3.235
31.1	-0.26	-2.75
31.12	0.1	-1.905
31.15	-0.21	-2.15
31.17	-0.01	-2.6
31.2	0.07	-3.105
31.22	0.24	-4.015
31.25	0.07	-2.67
31.27	-0.79	-3.1
31.29	0.37	-1.56
31.32	0.84	-3.615
31.34	-0.38	-3.16
31.37	0.42	-4.165
31.39	0.64	-3.645
31.41	0.35	-4.175
31.44	0.14	-2.885
31.46	0.92	-4.155
31.49	0.76	-4.11
31.51	0.34	-2.945
31.53	0.37	-3.585
31.56	0.04	-4.17
31.58	0.99	-3.56
31.61	0.3	-3.225
31.63	1.29	-4.03
31.65	-0.14	-3.9
31.68	0.36	-3.555
31.7	0.06	-3.25
31.73	0.31	-3.485
31.75	0.36	-3.955
31.77	0.36	-4.69
31.8	-0.14	-2.865
31.82	0.26	-4.28
31.85	0.07	-3.625
31.87	-0.63	-4.25
31.9	-0.02	-4.005
31.92	0.31	-4.655
31.94	0.21	-3.295
31.97	-0.13	-3.71
31.99	0.37	-3.97
32.02	0.74	-3.045
32.04	0.62	-3.945
32.06	-0.12	-3.85
32.09	0.17	-3.28
32.11	0.17	-3.69
32.14	0.92	-4.775
32.16	0.04	-3.83
32.18	0.07	-2.99
32.21	0.44	-3.01
32.23	0.17	-4.45
32.26	0.12	-3.18
32.28	0.15	-3.895
32.3	-0.41	-4.895
32.33	-0.31	-3.615
32.35	-0.34	-3.57
32.38	0.57	-4.655
32.4	-0.73	-3.45
32.43	-0.59	-3.955
32.45	0.14	-4.805
32.47	-0.4	-4.37
32.5	-0.3	-4.31
32.52	0.51	-4.24
32.55	0.13	-4.41
32.57	-0.59	-3.01
32.59	-0.06	-3.345
32.62	0.15	-3.925
32.64	-0.09	-3.5
32.67	-0.42	-4.07
32.69	-0.34	-3.72
32.71	-0.08	-3.52
32.74	0.07	-3.68
32.76	-0.27	-3.59
32.79	0.54	-3.205
32.81	0.61	-3.435
32.83	-0.27	-4.045
32.86	-0.24	-5.025
32.88	-0.04	-4.895
32.91	0.21	-3.87
32.93	-0.75	-2.245
32.96	-0.24	-3.105
32.98	0.37	-4.115
33	-0.12	-3.635
33.03	-0.14	-4.51
33.05	0.27	-4.11
33.08	0.16	-4.14
33.1	0.16	-4.19
33.12	0.15	-3.67
33.15	0.37	-3.875
33.17	0.07	-2.575
33.2	-0.08	-4.245
33.22	-0.18	-3.165
33.24	-0.36	-4.305
33.27	0.15	-3.415
33.29	-0.47	-2.92
33.32	-0.06	-3.08
33.34	-0.16	-2.49
33.36	0.41	-4.42
33.39	-0.01	-3.33
33.41	0.54	-2.295
33.44	0.29	-2.77
33.46	-0.04	-2.425
33.49	0.44	-3.225
33.51	0.05	-5.16
33.53	-0.46	-2.745
33.56	-0.02	-4.355
33.58	-0.11	-3.26
33.61	-0.7	-4.3
33.63	0.08	-3.64
33.65	-0.28	-4.34
33.68	-0.08	-3.9
33.7	0.32	-3.43
33.73	0.1	-2.76
33.75	-0.22	-4.27
33.77	0.13	-4.36
33.8	-0.07	-4.2
33.82	-0.36	-3.52
33.85	-0.46	-4.36
33.87	0.02	-4.97
33.89	-0.01	-4.465
33.92	-0.45	-3.12
33.94	0.01	-4.51
33.97	-0.7	-3.785
33.99	-0.35	-3.715
34.02	0.19	-4.515
34.04	-0.2	-4.255
34.06	0.25	-3.44
34.09	0.05	-4.025
34.11	-0.15	-4
34.14	-0.34	-5.245
34.16	-0.15	-3.765
34.18	-0.01	-3.405
34.21	-0.39	-2.88
34.23	0.03	-3.92
34.26	-0.43	-3.17
34.28	0.17	-5.025
34.3	-0.29	-3.805
34.33	-0.63	-3.775
34.35	-0.13	-5.125
34.38	0.5	-4.655
34.4	-0.36	-4.04
34.42	-0.06	-3.265
34.45	0.16	-4.385
34.47	0.17	-2.715
34.5	-0.13	-3.975
34.52	-0.22	-3.94
34.55	-0.12	-5.66
34.57	-0.33	-4.36
34.59	-0.88	-3.815
34.62	0.17	-5.975
34.64	0.14	-3.31
34.67	-0.04	-4.185
34.69	-0.41	-3.845
34.71	-0.11	-3.585
34.74	-0.09	-3.8
34.76	-0.09	-4.485
34.79	-0.1	-3.73
34.81	-0.71	-3.5
34.83	0.41	-3.79
34.86	-0.01	-4.585
34.88	0.25	-3.925
34.91	-0.14	-3.845
34.93	-0.53	-3.76
34.95	-0.32	-3.555
34.98	-0.18	-2.73
35	0.03	-4.07
35.03	-0.05	-3.82
35.05	0.57	-4.245
35.08	0.02	-4.41
35.1	0.18	-3.46
35.12	-0.06	-3.775
35.15	-0.35	-3.345
35.17	-0.61	-2.915
35.2	0.14	-3.315
35.22	-0.4	-3.075
35.24	-0.29	-3.915
35.27	-0.37	-3.885
35.29	-0.19	-5.085
35.32	-0.24	-4.295
35.34	-0.13	-3.905
35.36	-0.62	-3.985
35.39	-0.47	-3.015
35.41	-0.29	-3.385
35.44	-0.22	-4.09
35.46	0.64	-3.555
35.48	-0.09	-3.42
35.51	-0.18	-3.905
35.53	-0.08	-4.175
35.56	-0.15	-2.12
35.58	-0.43	-3.235
35.61	-0.62	-2.2
35.63	-0.28	-2.865
35.65	0.01	-3.81
35.68	0.02	-3.095
35.7	0.05	-3.435
35.73	-0.66	-4.1
35.75	0.53	-3.435
35.77	-0.44	-4.095
35.8	-0.53	-2.96
35.82	-0.01	-3.355
35.85	0.36	-2.695
35.87	-0.8	-3.14
35.89	-0.71	-3.05
35.92	-0.29	-3.1
35.94	-0.06	-2.72
35.97	-0.05	-4.235
35.99	-0.13	-3.44
36.01	-0.48	-3.625
36.04	-0.69	-3.365
36.06	-0.52	-2.49
36.09	-0.69	-2.88
36.11	-0.66	-3.995
36.14	-0.75	-2.855
36.16	-0.41	-3.02
36.18	-0.37	-2.99
36.21	-0.27	-3.49
36.23	-0.29	-3.65
36.26	-0.33	-3.93
36.28	-0.37	-4.21
36.3	-0.54	-3.255
36.33	-0.35	-3.685
36.35	-0.85	-3.485
36.38	0.25	-3.455
36.4	-0.49	-3.24
36.42	-0.64	-4.24
36.45	-0.11	-3.48
36.47	0.11	-1.765
36.5	-0.9	-4.335
36.52	-0.35	-4.04
36.54	-0.62	-4.155
36.57	-1.08	-4.16
36.59	-0.44	-4.395
36.62	0.33	-5.015
36.64	-0.36	-4.34
36.67	-0.57	-3.795
36.69	-0.57	-4.18
36.71	-0.76	-4.225
36.74	-0.94	-2.62
36.76	-0.14	-3.165
36.79	-0.47	-3.545
36.81	-0.74	-3.88
36.83	-0.25	-3.26
36.86	-0.43	-3.58
36.88	-0.26	-3.405
36.91	-1.14	-3.515
36.93	-0.9	-2.64
36.95	-0.34	-4.195
36.98	-0.54	-2.725
37	0	-3.25
37.03	0.21	-2.585
37.05	-0.02	-3.09
37.07	0.05	-3.255
37.1	-0.64	-4.165
37.12	-0.15	-3.455
37.15	-0.03	-5.19
37.17	-0.53	-3.91
37.2	0.37	-2.935
37.22	-0.72	-2.69
37.24	0.23	-3.38
37.27	-0.12	-3.695
37.29	-0.73	-3.975
37.32	-0.91	-4.195
37.34	-0.29	-3.025
37.36	-0.47	-3.905
37.39	-0.32	-4.415
37.41	0.27	-4.755
37.44	-0.2	-3.875
37.46	-0.48	-4.475
37.48	-0.3	-4.84
37.51	-0.69	-3.735
37.53	-0.45	-2.93
37.56	-0.09	-4.07
37.58	0.27	-4.47
37.6	-0.28	-4.295
37.63	-0.96	-3.56
37.65	-0.39	-3.975
37.68	-0.57	-3.46
37.7	-0.22	-4.77
37.73	-1.03	-3.65
37.75	-0.42	-4.175
37.77	-0.33	-4.185
37.8	-0.2	-4.51
37.82	-0.1	-5.425
37.85	-0.92	-4.535
37.87	0.35	-3.535
37.89	-0.29	-3.81
37.92	-0.69	-4.31
37.94	-0.46	-2.285
37.97	-0.08	-4.035
37.99	-0.46	-4.535
38.01	-0.83	-4.045
38.04	-0.79	-3.97
38.06	-0.58	-3.62
38.09	-0.5	-3.52
38.11	-0.42	-4.27
38.13	-0.41	-3.655
38.16	-0.77	-5.015
38.18	0.04	-4.495
38.21	-0.89	-5.09
38.23	-0.24	-3.09
38.26	-0.11	-4.465
38.28	-0.78	-4.265
38.3	-0.32	-4.115
38.33	-0.08	-3.805
38.35	-0.46	-4.1
38.38	-0.03	-5.425
38.4	-0.01	-4.265
38.42	-0.12	-5.645
38.45	-0.82	-4.365
38.47	-1.47	-4.345
38.5	-0.48	-4.59
38.52	-0.65	-4.9
38.54	-0.38	-3.785
38.57	-0.56	-4.95
38.59	-0.23	-2.685
38.62	-0.24	-4.155
38.64	-0.38	-5.02
38.66	-0.18	-4.47
38.69	-0.49	-4.335
38.71	-0.34	-2.42
38.74	-0.27	-3.94
38.76	0.18	-4.85
38.79	-0.2	-4.875
38.81	-0.18	-2.955
38.83	-0.11	-3.61
38.86	-0.97	-3.97
38.88	-0.26	-4.015
38.91	0.36	-3.915
38.93	-0.13	-4.435
38.95	-0.64	-4.55
38.98	-0.43	-3.905
39	-0.07	-4.095
39.03	-0.41	-4.655
39.05	0.11	-3.68
39.07	-0.16	-4.545
39.1	-0.24	-3.13
39.12	-0.39	-4.66
39.15	-1.07	-4.19
39.17	-0.89	-5.3
39.19	-0.24	-4.845
39.22	-0.83	-3.36
39.24	-1.26	-4.135
39.27	-0.4	-4.9
39.29	-0.66	-4.1
39.32	-0.72	-3.365
39.34	-1.42	-4.27
39.36	-0.76	-4.32
39.39	-0.94	-4.15
39.41	-0.4	-4.375
39.44	-0.51	-4.075
39.46	-0.58	-3.445
39.48	-0.45	-3.425
39.51	-0.54	-4.69
39.53	-0.74	-4.665
39.56	-0.35	-4
39.58	0.16	-4.375
39.6	-0.53	-4.955
39.63	0.3	-2.59
39.65	-0.35	-4.5
39.68	-0.65	-4.02
39.7	-1.16	-4.59
39.72	-0.05	-3.77
39.75	-1	-4.37
39.77	-0.95	-2.62
39.8	-0.71	-3.58
39.82	-0.27	-4.755
39.85	-0.19	-3.815
39.87	-0.29	-3.71
39.89	-0.25	-4.68
39.92	-0.49	-4.455
39.94	-0.7	-4.845
39.97	-0.46	-3.47
39.99	-0.16	-3.29
40.01	-0.58	-3.17
40.04	-0.8	-4.12
40.06	-0.82	-3.755
40.09	-0.5	-5
40.11	-0.83	-3.69
40.13	-0.9	-4.565
40.16	-1.07	-3.995
40.18	-0.72	-4.39
40.21	-0.65	-4.26
40.23	-1.05	-4.65
40.25	0.03	-4.465
40.28	-0.24	-3.86
40.3	0.27	-4.67
40.33	-0.55	-4.17
40.35	-0.15	-4.31
40.38	-0.26	-3.015
40.4	0.2	-3.87
40.42	-0.35	-5.65
40.45	-0.34	-4.195
40.47	-0.48	-5.275
40.5	0.27	-5.09
40.52	0.19	-4.54
40.54	-0.4	-4.135
40.57	0.22	-4.685
40.59	-0.13	-4.835
40.62	-0.26	-3.84
40.64	-0.18	-4.04
40.66	0.05	-2.925
40.69	0.34	-5.135
40.71	0.05	-3.935
40.74	0.91	-4.53
40.76	2.66	-4.29
40.78	2.8	-4.825
40.81	4	-4.6
40.83	3.48	-3.445
40.86	3.91	-4.845
40.88	4.17	-4.605
40.91	4.15	-4.42
40.93	4.32	-3.885
40.95	4.31	-2.93
40.98	5.29	-4.765
41	4.88	-3.715
41.03	5.74	-4.165
41.05	5.62	-4.46
41.07	4.61	-5.55
41.1	5.01	-4.965
41.12	5.25	-3.795
41.15	4.94	-2.79
41.17	5.17	-4.98
41.19	4.99	-2.95
41.22	5.74	-2.655
41.24	6.53	-3.525
41.27	5.55	-2.77
41.29	5.61	-2.695
41.31	5.93	-2.465
41.34	5.36	-1.37
41.36	5.48	-1.65
41.39	3.96	-1.52
41.41	3.39	-1.38
41.44	2.55	-3.425
41.46	0.77	-1.89
41.48	-0.81	-2.725
41.51	-0.7	-4.71
41.53	-1.41	-4.29
41.56	-2.14	-5.17
41.58	-2.26	-5.755
41.6	-2.16	-7.38
41.63	-2.82	-6.87
41.65	-1.85	-6.635
41.68	-1.83	-7.355
41.7	-1.3	-6.455
41.72	-1.37	-7.095
41.75	-1.58	-7
41.77	-1.59	-7.34
41.8	-1.36	-7.31
41.82	-1.17	-7.065
41.84	-2.24	-4.705
41.87	-1.74	-3.93
41.89	-2.38	-2.985
41.92	-1.82	-3.37
41.94	-2.23	-1.885
41.97	-2.42	-2.865
41.99	-1.77	-2.09
42.01	-2.78	-2.825
42.04	-2.28	-2.46
42.06	-2.37	-2.115
42.09	-1.68	-3.06
42.11	-2.19	-2.52
42.13	-2.29	-2.885
42.16	-1.6	-2.945
42.18	-1.98	-3.72
42.21	-2.54	-2.29
42.23	-1.56	-3.315
42.25	-2.01	-2.69
42.28	-1.67	-4.135
42.3	-1.93	-3
42.33	-1.53	-3.15
42.35	-1.72	-4.68
42.37	-1.63	-3.82
42.4	-1.82	-5.205
42.42	-1.59	-4.105
42.45	-1.35	-4.125
42.47	-2.02	-3.645
42.5	-1.32	-4.455
42.52	-1.14	-4.16
42.54	-0.97	-3.505
42.57	-1.86	-4.435
42.59	-1.67	-3.54
42.62	-1.56	-3.55
42.64	-1.36	-3.38
42.66	-1.65	-3.92
42.69	-1.06	-4.005
42.71	-0.83	-4.415
42.74	-2.06	-3.205
42.76	-1.68	-3.115
42.78	-1.36	-2.83
42.81	-1.81	-3.575
42.83	-1.33	-3.53
42.86	-2.18	-3.32
42.88	-1.28	-3.895
42.9	-1.66	-4.345
42.93	-1.83	-3.31
42.95	-1.25	-3.875
42.98	-1.63	-3.585
43	-1.45	-3.295
43.03	-1.17	-3.665
43.05	-1.48	-3.895
43.07	-1.16	-2.935
43.1	-1.98	-3.205
43.12	-1.46	-3.485
43.15	-1.58	-3.355
43.17	-2.05	-2.645
43.19	-2.03	-2.73
43.22	-1.99	-3.355
43.24	-1.33	-3.06
43.27	-1.8	-2.305
43.29	-2.36	-4.18
43.31	-1.56	-4.475
43.34	-2.05	-4.725
43.36	-1.44	-4.275
43.39	-1.59	-3.4
43.41	-1.8	-3.925
43.43	-1.46	-3.04
43.46	-1.75	-4.215
43.48	-1.93	-2.99
43.51	-1.52	-3.95
43.53	-1.47	-4.01
43.56	-1.62	-3.705
43.58	-1.27	-3.875
43.6	-1.6	-3.135
43.63	-1.6	-3.985
43.65	-1.39	-4.175
43.68	-1.48	-3.585
43.7	-1.9	-2.765
43.72	-1.85	-3.36
43.75	-1.77	-5.04
43.77	-1.41	-2.65
43.8	-1.8	-3.225
43.82	-1.33	-4.27
43.84	-1.72	-3.935
43.87	-1.4	-3.46
43.89	-1.58	-4.605
43.92	-2.11	-4.45
43.94	-1.48	-4.43
43.96	-1.95	-3.94
43.99	-1.4	-4.105
44.01	-1.59	-3.975
44.04	-1.53	-4.575
44.06	-1.69	-5.155
44.09	-0.7	-3.305
44.11	-2.16	-4.47
44.13	-1.78	-4.17
44.16	-1.88	-3.805
44.18	-1.71	-3.61
44.21	-1.21	-4.2
44.23	-1.6	-3.6
44.25	-1.98	-3.905
44.28	-2.13	-2.71
44.3	-1.55	-3.515
44.33	-1.46	-3.69
44.35	-1.75	-3.205
44.37	-1.76	-3.87
44.4	-1.87	-3.94
44.42	-2.28	-4.25
44.45	-1.73	-2.29
44.47	-1.64	-5.095
44.49	-1.25	-3.72
44.52	-1.49	-2.575
44.54	-1.59	-3.85
44.57	-1.77	-5.315
44.59	-1.6	-5.235
44.62	-1.63	-4.585
44.64	-1.96	-3.75
44.66	-1.43	-3.455
44.69	-1.54	-3.46
44.71	-1.96	-3.925
44.74	-2.02	-3.835
44.76	-1.66	-3.99
44.78	-1.91	-4.6
44.81	-1.61	-3.155
44.83	-1.06	-3.36
44.86	-1.31	-4.255
44.88	-1.44	-4.025
44.9	-1.85	-4.495
44.93	-1.19	-4.415
44.95	-1.47	-4.79
44.98	-1.39	-4.515
45	-1.24	-3.155
45.02	-1.26	-3.91
45.05	-1.35	-3.38
45.07	-1.28	-3.245
45.1	-1.13	-4.44
45.12	-1.86	-4.78
45.15	-1.62	-3.975
45.17	-1.87	-3.25
45.19	-1.65	-3.205
45.22	-1.94	-3.915
45.24	-1.52	-5.185
45.27	-1.12	-4.835
45.29	-1.62	-3.355
45.31	-1.85	-4.315
45.34	-1.66	-5.07
45.36	-1.7	-4.625
45.39	-1.83	-3.145
45.41	-1.86	-4.49
45.43	-1.95	-3.85
45.46	-1.44	-4.5
45.48	-1.21	-4.8
45.51	-1.43	-4.475
45.53	-1.41	-4.61
45.55	-1.54	-4.08
45.58	-1.65	-4.055
45.6	-2.16	-4.3
45.63	-1.77	-2.87
45.65	-1.97	-3.31
45.68	-1.8	-3.29
45.7	-1.6	-3.665
45.72	-1.08	-5.285
45.75	-1.45	-4.08
45.77	-1.94	-3.655
45.8	-2.08	-3.44
45.82	-0.79	-4.34
45.84	-1.83	-4.295
45.87	-1.37	-4.015
45.89	-1.81	-4.38
45.92	-1.49	-5.88
45.94	-1.8	-3.6
45.96	-0.73	-3.88
45.99	-1.47	-4.345
46.01	-1.39	-4.625
46.04	-1.75	-4.215
46.06	-1.42	-4.45
46.08	-1.37	-3.84
46.11	-1.35	-4.23
46.13	-1.19	-4.565
46.16	-1.25	-4.565
46.18	-0.81	-3.985
46.21	-1.4	-6.5
46.23	-1.46	-4.315
46.25	-0.78	-4.745
46.28	-1.56	-4.555
46.3	-1.02	-3.725
46.33	-1.9	-5.295
46.35	-1.46	-3.73
46.37	-1.34	-5.21
46.4	-1.24	-3.925
46.42	-1.55	-5.215
46.45	-1.1	-3.99
46.47	-1.66	-3.695
46.49	-1.21	-5.045
46.52	-1.14	-4.31
46.54	-0.94	-5.33
46.57	-0.5	-4.98
46.59	-0.76	-3.41
46.61	-1.73	-4.735
46.64	-1.54	-4.95
46.66	-1.25	-5.115
46.69	-1.25	-4.165
46.71	-1.49	-5.63
46.74	-0.81	-5.15
46.76	-1.15	-5.425
46.78	-1.55	-5.735
46.81	-1.62	-5.025
46.83	-0.62	-4.425

## Sheet: Figure 6J
spontaneous:	Time									Mean	SEM	clamped:						Mean DF/F0	SEM DF/F0	Mean Wavelength	SEM Wavelength
	0	-0.82	-1.77	-0.02128	0.41	0.75	-0.37	0.03	-0.89	-0.33516	0.28559		0.14	-0.83	0	-3.5	0	-0.838	0.68729	574.6	15.5936
	0.01	0.45	0.64	-0.21661	-0.22	0.89	1.28	-1.2	-2.88	-0.15708	0.47575		0.13	-0.82	0	-2.67	0	-0.672	0.52727	574.6	15.5936
	0.03	-0.69	0.01	0.13814	2.46	-0.67	-0.34	0.44	-1.67	-0.04023	0.42428		-0.18	-0.3	0	-3.02	0	-0.7	0.58279	574.6	15.5936
	0.04	-0.75	-1.07	0.18544	2.38	0.47	-0.67	0.42	-4.56	-0.44932	0.69988		0.52	-1.06	0	-3.7	0	-0.848	0.75791	574.6	15.5936
	0.06	-1.28	1.45	-0.22392	3.48	0.32	1.19	0.66	-1.18	0.55201	0.54789		0.56	-1.09	0	-2.39	0	-0.584	0.52481	575	15.3297
	0.07	-1.04	0.18	-0.24362	1.64	-1.43	0.2	0.01	-1.13	-0.2267	0.34882		-0.09	-0.46	0	-2.97	0	-0.704	0.57282	574.6	15.5936
	0.09	-1.83	0.38	-0.34544	3.67	-2.77	0.24	0.63	-1.15	-0.14693	0.68607		0.65	-0.55	0	-3.43	0	-0.666	0.71666	574.6	15.5936
	0.1	-1.05	0.9	-0.43222	0.61	0.16	1.05	-2.7	-1.12	-0.32278	0.44941		-0.63	-0.84	0	-1.85	0	-0.664	0.34063	575	15.3297
	0.11	-0.1	0.98	-0.95844	0.36	2.81	-1.26	0.19	-1.77	0.03145	0.51171		0.1	-0.66	0	-2.53	0	-0.618	0.49683	574.6	15.5936
	0.13	-0.68	0.42	0.29249	2.06	0.23	-0.35	0.12	-1.58	0.06406	0.36891		0.38	-0.6	0	-1.44	0	-0.332	0.31835	574.6	15.5936
	0.14	-0.99	0.15	-0.10024	0.94	1.08	2.19	0.96	-0.32	0.48872	0.35284		-0.15	-1.17	0	-2.58	0	-0.78	0.50029	574.4	15.7277
	0.16	-0.63	-0.14	0.76369	1.08	0.17	0.44	0.34	0.91	0.36671	0.20074		0.28	-0.93	0	-1.53	0	-0.436	0.34159	574.4	15.7277
	0.17	-0.84	0.75	-0.22342	-0.46	-0.44	0.35	0.84	-1.62	-0.20543	0.29393		-0.46	0.03	0	-1.18	0	-0.322	0.23308	574.6	15.5936
	0.19	-1.29	-0.11	0.12152	1.66	1.88	0.18	1.28	-0.16	0.44519	0.38013		-0.24	-0.2	0	-1.82	0	-0.452	0.34558	574.4	15.7277
	0.2	0.64	1.02	0.30754	0.23	0.33	0.59	-0.87	-0.21	0.25469	0.20426		0.27	-1.2	0	-2.21	0	-0.628	0.47038	574.4	15.7277
	0.22	-1.7	-0.31	0.57767	0.72	-0.76	-1	0	-0.01	-0.31029	0.28802		0.35	-1.54	0	-1.65	0	-0.568	0.42447	574.6	15.5936
	0.23	-1	-1.59	-0.24104	1.52	0.84	-0.18	1.07	0.82	0.15487	0.38406		0.26	-0.67	0	-2.2	0	-0.522	0.44688	574.4	15.7277
	0.24	-0.19	0.81	-0.15793	2.37	0.01	-1.56	0.93	-1.24	0.12151	0.44425		0.11	-0.48	0	-2.2	0	-0.514	0.43368	574.2	15.8632
	0.26	-0.26	0.4	-0.46862	1.04	0.44	-0.01	-0.13	-2.47	-0.18233	0.36777		-0.04	-0.12	0	-1.14	0	-0.26	0.22109	574.2	15.8632
	0.27	-0.43	0.19	0.25143	0.12	1.98	-0.35	-0.61	-0.81	0.04268	0.30924		0.26	-0.76	0	-2.73	0	-0.646	0.54825	574.2	15.8632
	0.29	0.67	0.51	0.49456	2.33	1.22	0.71	1	-0.94	0.74932	0.3209		0.13	-0.49	0	-0.35	0	-0.142	0.11804	574.4	15.7277
	0.3	-0.35	0.84	0.63636	1.56	1.71	1.92	0.25	0.39	0.86955	0.28167		0.04	-0.88	0	-1.09	0	-0.386	0.24689	574.4	15.7277
	0.32	-0.95	-0.66	-0.60419	0.92	0.17	-0.21	2.98	-0.55	0.13698	0.45621		-0.19	-0.1	0	-0.88	0	-0.234	0.16534	574.4	15.7277
	0.33	-1.12	0.37	-0.70493	2.79	-0.51	0.09	-1.21	-0.12	-0.05187	0.45114		-0.05	-1.34	0	-0.16	0	-0.31	0.25915	574.4	15.7277
	0.34	-1.08	0.1	-0.16	1.82	-0.14	-0.33	0.45	-1.21	-0.06875	0.33466		0.7	-0.53	0	-1.25	0	-0.216	0.32405	574.4	15.7277
	0.36	0.31	0.91	0.34129	0.64	-0.31	0.85	-0.72	-2.05	-0.00359	0.35329		-0.26	-1.1	0	-1.1	0	-0.492	0.25271	574.8	15.4609
	0.37	-0.45	1.14	0.39997	2.21	0.35	0.18	0.52	-0.13	0.5275	0.29162		-0.23	-0.5	0	-1.17	0	-0.38	0.21792	574.6	15.5936
	0.39	-0.94	-0.81	0.34237	0.55	-1.54	1.65	0.13	2.1	0.1853	0.44733		0.33	-0.46	0	-0.65	0	-0.156	0.17626	574.6	15.5936
	0.4	-0.18	-0.5	-0.70967	0.66	0.65	0.58	-0.64	-1.12	-0.15746	0.24807		0.45	-1.15	0	-0.71	0	-0.282	0.28561	574.8	15.4609
	0.42	0.11	-0.43	-0.24204	-1.34	-0.74	0.44	-0.42	-2.03	-0.58151	0.27981		0.59	-0.18	0	-0.82	0	-0.082	0.22575	574.6	15.5936
	0.43	-1.81	-1.19	-0.3486	0.02	0.87	0.82	-1.74	-1.85	-0.65358	0.407		-0.12	-1.13	0	0.43	0	-0.164	0.25901	574.2	15.8632
	0.45	-0.78	-0.6	0.11736	1.96	0.38	0.19	-1.05	-0.17	0.00592	0.331		0.19	-0.59	0	-0.67	0	-0.214	0.1738	574.2	15.8632
	0.46	-1.33	1.82	0.77093	0.6	0.97	0.01	1.1	-0.86	0.38512	0.37177		-0.64	-0.67	0	-0.65	0	-0.392	0.16011	573.8	15.7048
	0.47	-1.25	0.68	-0.19849	1.57	-1.42	1.25	0.81	-0.3	0.14269	0.39396		0.05	-0.4	0	0.09	0	-0.052	0.08862	573.8	16.1381
	0.49	-0.05	0.15	0.27687	1.54	0.53	0.3	1.69	0.81	0.65586	0.22816		0.76	-0.52	0	-0.43	0	-0.038	0.22646	573.8	16.1381
	0.5	-0.98	-0.04	0.89037	1.19	1.18	0.01	-1.22	1.35	0.29755	0.35772		0.22	-0.24	0	0.92	0	0.18	0.1988	573	16.4803
	0.52	-0.7	-0.43	0.49871	3.58	0.29	0.84	1.37	1.38	0.85359	0.47212		-0.05	0.01	0	0.42	0	0.076	0.08664	573.2	16.5602
	0.53	-0.59	-0.27	0.1886	2.16	1.42	1.1	0.93	-0.88	0.50733	0.37628		-0.72	-0.51	0	0.49	0	-0.148	0.2132	573	16.4803
	0.55	1.02	-0.52	0.49555	0.69	-0.81	2.15	0.04	-0.18	0.36069	0.33552		-0.48	-0.82	0	1.05	0	-0.05	0.31566	572.8	15.9574
	0.56	-0.66	0.84	0.78963	0.65	0.16	1.9	0.66	0.47	0.6012	0.25311		-0.56	-0.46	0	-0.42	0	-0.288	0.11977	572.6	15.6895
	0.57	-0.79	0.18	0.35841	1.67	-0.02	0.18	1.16	0.61	0.41855	0.26467		-0.34	-1.1	0	0.54	0	-0.18	0.26974	572.8	15.3473
	0.59	-0.37	0.93	-0.2447	0.56	0.35	0.77	0.78	-2.45	0.04066	0.39389		-0.19	-0.44	0	0.69	0	0.012	0.18776	573.4	15.348
	0.6	-0.78	-0.65	-0.09816	3.58	-0.87	1.16	1.75	0.75	0.60523	0.54534		0.21	-0.87	0	0.44	0	-0.044	0.22191	573	15.2118
	0.62	1.11	0.02	0.32882	0.19	-0.47	2.18	2.04	0.72	0.76485	0.33674		-0.01	0.21	0.63	0.22	0	0.21	0.11597	572.8	15.1473
	0.63	-0.29	-0.42	-0.29507	2.15	-0.64	1.44	0.37	-1.22	0.13687	0.3993		-0.32	-0.15	1.31	0.58	0	0.284	0.29784	572.8	15.1473
	0.65	1.03	-1.33	0.41659	-0.43	-0.16	0.77	1.86	1.44	0.44957	0.37136		-0.85	-0.47	0.69	-0.5	0	-0.226	0.26591	571.6	14.4589
	0.66	0.4	0.11	0.92519	0.65	1.17	2.04	1.5	-0.92	0.7344	0.32079		-0.28	-0.5	1.24	1.32	0	0.356	0.38566	571.6	13.8441
	0.67	1.18	-0.29	-0.29407	3.52	0.3	2.31	0.47	-0.57	0.82824	0.50775		-0.86	-0.2	1.14	0.6	0	0.136	0.34254	572	13.7949
	0.69	0.1	1.09	0.39224	1.98	0.42	2.15	0.11	-0.03	0.77653	0.30649		0.36	0.13	0.94	0.74	0.11	0.456	0.16585	571.4	13.0369
	0.7	1.06	0.45	0.0566	0.38	1.42	0.74	0.88	-0.51	0.55958	0.21411		0.07	0.2	1.08	1.28	0.51	0.628	0.23852	570.6	12.6159
	0.72	0.62	1.59	0.97506	1.36	-0.25	0.64	-0.83	0.66	0.59563	0.28257		0.28	-0.23	1.32	0.1	1.16	0.526	0.3038	568.4	12.3313
	0.73	-0.67	1.48	0.42183	1.32	0.62	1.55	1.12	0.04	0.73523	0.27639		0.22	-0.77	1.02	1.48	0.26	0.442	0.38489	566.4	12.7773
	0.75	0.29	1.26	0.7543	1.86	1.12	0.48	1.7	0.01	0.93429	0.23498		0.11	-0.31	1.63	0.49	0.38	0.46	0.32339	564.4	12.4764
	0.76	0.23	-0.18	0.7725	1.97	1.26	0.49	0.72	0.51	0.72156	0.23161		0.5	-0.18	1.19	0.61	0.71	0.566	0.22056	562.8	12.4796
	0.78	0.9	0.62	0.00208	-0.47	0.31	-0.11	-0.12	0.1	0.15401	0.15573		0.43	-0.47	0.6	0.31	0.53	0.28	0.19375	561	12.7004
	0.79	1.41	1.81	1.3855	2	1.23	0.09	1.76	-0.75	1.11694	0.33765		0.01	-0.47	1.08	1.46	-0.62	0.292	0.41696	559.8	12.9862
	0.8	1.76	0.93	0.8769	0.91	3.35	0.53	2.32	1.97	1.58086	0.33629		0.38	-0.13	1.21	0.86	0.78	0.62	0.22928	557.6	13.0023
	0.82	0.96	1.42	0.91846	0.73	2.12	1.74	0.79	1.88	1.31981	0.19179		-0.05	-0.23	0.63	0.79	-0.61	0.106	0.26385	556.6	12.6831
	0.83	2.29	1.01	0.59845	1.19	3.17	0.67	0.98	3.04	1.61856	0.37274		0.08	-0.36	2.1	1.23	0.89	0.788	0.4328	555.2	12.839
	0.85	1.57	1.04	1.77874	0.82	2.84	0.52	2.45	2.43	1.68109	0.29933		0.92	0.02	1.71	1.34	0.63	0.924	0.29108	553.4	12.7538
	0.86	2.23	0.61	1.85147	3.62	2.44	2.25	2.35	0.1	1.93143	0.39148		1.18	0.26	1.15	0.73	-0.51	0.562	0.31593	550.2	13.3507
	0.88	1.4	3.04	1.68265	2.77	3.46	0.36	1.43	3.5	2.20533	0.40519		1.18	-0.16	1.14	0.56	-1	0.344	0.4147	547.6	13.7935
	0.89	3.13	1.06	2.00831	1.46	2.24	0.84	3.01	4.02	2.22104	0.39108		0.09	-0.17	1.22	-0.04	-0.05	0.21	0.25583	546.4	14.0378
	0.9	2.88	2.2	3.03699	2.65	2.84	1.74	3.8	3.58	2.84087	0.23775		0.75	0.03	1.38	0.27	-1.1	0.266	0.41212	545.6	14.3618
	0.92	3.58	2.69	3.17413	2.95	3.96	1.02	2.5	0.92	2.59927	0.39186		1.15	0.19	2.05	1.21	1.27	1.174	0.29553	545	14.8762
	0.93	4.09	1.8	2.24936	3.08	3.04	1.63	4.55	1.35	2.72367	0.41384		1.03	0.49	2.7	1.81	-0.14	1.178	0.49741	542.8	15.7937
	0.95	4.97	3.24	3.56479	3.06	3.4	2.07	3.29	3.78	3.42185	0.2852		0.74	0.56	1.65	1.78	0.51	1.048	0.27574	538.4	16.9488
	0.96	4.25	3.79	2.97199	2.26	3.24	2.5	3.52	2.16	3.0865	0.26588		1.07	-0.23	2.79	0.81	1.08	1.104	0.4853	535.4	17.4488
	0.98	3.41	2.11	3.85571	1.95	3.63	1.69	2.81	1.44	2.61196	0.33201		1.32	0.64	3.17	1.45	-0.05	1.306	0.53748	531	19.0342
	0.99	3.67	2.99	3.61051	3.16	2.63	3.02	4.11	1.67	3.10756	0.26366		1.75	1.09	2.74	1.93	0.02	1.506	0.45515	527	21.2532
	1.01	4.73	2.85	2.93201	3.39	3.33	0.44	2.75	2.06	2.81025	0.43286		1.43	0.88	4.13	1.53	0.51	1.696	0.6362	521.6	22.3128
	1.02	4.83	2.68	3.70759	1.77	2.25	2.4	3.03	3.99	3.0822	0.3614		1.44	1.11	2.31	2.18	0.96	1.6	0.2753	515.2	24.336
	1.03	4.6	4.53	2.35126	-0.09	2.5	3.3	5.34	5.11	3.45516	0.64753		1.76	1.27	1.51	2.05	1.26	1.57	0.15103	509.4	25.1865
	1.05	5.3	3.71	1.89876	3.58	2.43	2.64	3.22	2.57	3.16859	0.3733		1.79	1.29	-1.71	3.08	0.94	1.078	0.78587	503.2	25.4468
	1.06	4.9	2.96	3.10963	3.25	1.44	3.94	4.11	3.16	3.3587	0.35936		1.52	1.88	-4.38	1.35	1.25	0.324	1.18088	496.6	25.8875
	1.08	4.36	2.31	2.33771	2.24	3.2	1.49	4.27	3.2	2.92596	0.36033		1.44	1.25	-5.25	3.85	1.38	0.534	1.52479	495.6	22.7037
	1.09	5.03	3.06	3.23489	2.63	3.64	1.16	2.72	1.92	2.92436	0.40776		1.96	1.46	-5.44	3.81	0.73	0.504	1.57076	493.8	20.7302
	1.11	5.04	2.08	2.49514	3.5	5.73	3.19	2.91	2.57	3.43939	0.45612		1.18	1	-3.57	5.02	0.11	0.748	1.37026	492.2	20.3995
	1.12	6.01	4.3	2.66553	4.3	3.13	2.74	2.63	4.92	3.83694	0.44029		0.93	1.8	-2.27	4.55	0.58	1.118	1.09652	489.6	22.4646
	1.13	4.47	3	3.59904	1.9	5.13	5.54	4.16	1.38	3.64738	0.5233		0.57	1.45	-1.4	2.69	0.84	0.83	0.66651	485.4	24.3261
	1.15	4.48	2.66	3.1211	2.46	4.03	4.08	4.45	4.42	3.71264	0.29567		-0.44	2.01	-2.28	-0.39	0.77	-0.066	0.71258	482.4	25.4098
	1.16	4.42	2.52	2.31693	4.87	4.98	2.51	3.05	5.13	3.72462	0.43731		-1	2.17	-2.29	-2.35	1.59	-0.376	0.95647	481.6	25.0851
	1.18	2.5	3.21	3.83077	3.98	3.49	2.35	2.82	6.01	3.52385	0.41197		-2.29	2.02	-2.62	-3.01	0.34	-1.112	0.97933	483.2	23.0074
	1.19	4.6	4.2	3.61824	4.64	3.32	3.54	3.49	2.7	3.76353	0.2365		-2.33	2.12	-3.9	-3.96	1.35	-1.344	1.29626	487.6	20.7668
	1.21	6.2	2.94	2.91489	3.19	4.52	2.79	3.79	5.06	3.92561	0.4362		-3.49	2.34	-2.7	-2.41	0.68	-1.116	1.11779	492.8	19.3065
	1.22	5.79	4.05	4.71233	4.08	4.59	2.94	4.77	3.27	4.27529	0.31936		-3.07	1.52	-3.61	-0.36	1.24	-0.856	1.06703	497	18.644
	1.23	4.04	4.4	4.30039	2.84	5.02	4.11	2.66	4.6	3.9963	0.29294		-2.91	1.77	-3.21	0.8	0.25	-0.66	1.01068	500.4	20.6727
	1.25	5.26	4.13	4.55025	5.29	3.98	3.31	5.41	3.76	4.46128	0.28003		-2.62	2.72	-3.1	1.97	1.12	0.018	1.20429	504.2	22.5064
	1.26	3.9	3.8	3.23282	3.29	4.23	4.48	5.19	4.6	4.09035	0.23667		-4.1	2.68	-3.57	2.37	0.17	-0.49	1.43497	504.4	26.1239
	1.28	3.96	3.87	4.26241	4.21	3.47	4.45	3.69	3.34	3.90655	0.13866		-4.75	2.12	-3.5	2.26	0.21	-0.732	1.44533	504	28.3884
	1.29	7.26	3.65	3.33929	2.87	2.53	3.67	5.25	3.94	4.06366	0.53896		-4.33	2.03	-2.67	0.72	-0.01	-0.852	1.15948	504.4	31.1169
	1.31	4.65	3.65	3.4889	3.63	2.83	4.57	2.31	5.47	3.82486	0.36372		-3.22	1.36	-3.02	1.37	-0.05	-0.712	1.01693	505.8	33.3083
	1.32	4.93	4.3	2.35591	1.19	5.51	2.84	2.96	5.44	3.69074	0.56013		-3.67	0.75	-3.7	0.61	-0.38	-1.278	1.00179	506.2	35.4562
	1.34	4.94	3.41	3.4047	2.65	4	4.81	3.88	4.77	3.98309	0.28877		-2.62	0.22	-2.39	0.43	1.02	-0.668	0.7622	508.2	37.4011
	1.35	6.12	2.91	3.47486	5.68	4.13	3.89	3.48	2.81	4.06186	0.4323		-1.7	-1.2	-2.97	0.02	0.5	-1.07	0.61955	510.4	38.3166
	1.36	6.02	3.86	3.49098	4.01	5.07	5.29	3.39	6.56	4.71137	0.42354		-2.33	-1.5	-3.43	-0.81	0.49	-1.516	0.66516	509.2	38.7071
	1.38	3.71	4.82	3.15335	3.28	5.69	4.2	4.31	7.28	4.55542	0.48687		-1.05	-1.86	-1.85	0.27	0.07	-0.884	0.4558	509.4	38.6996
	1.39	4.89	4.55	3.95129	3.3	4.01	4.32	4.78	7.78	4.69766	0.47608		-0.64	-1.89	-2.53	-0.44	0.4	-1.02	0.52603	511	38.0473
	1.41	5.48	4.65	2.89569	2.93	5.45	5.66	4.86	8.05	4.99696	0.58288		-0.31	-2.23	-1.44	0.47	1.31	-0.44	0.63685	512	37.7319
	1.42	4.53	4.16	3.13615	3.8	4.45	5.38	4.35	7.48	4.66077	0.46174		-0.73	-1.89	-2.58	-0.74	0.31	-1.126	0.50328	512.8	37.3221
	1.44	4.3	4.97	3.81722	8.64	4.74	4.62	3.58	6.99	5.20715	0.61215		0.07	-1.58	-1.53	-1.02	0.92	-0.628	0.4877	513.6	37.2741
	1.45	3.25	4.89	3.06708	5.19	3.97	4.44	6.74	7.31	4.85714	0.54152		-0.3	-1.32	-1.18	0.57	-0.21	-0.488	0.34663	515	36.6142
	1.46	3.26	5.21	4.71856	4.27	4.98	5.08	4.76	4.25	4.56607	0.22378		0.33	-1.19	-1.82	0.02	-0.4	-0.612	0.39529	516.2	36.0269
	1.48	3.83	5.81	3.3476	4.87	4.47	6.25	6.37	3.83	4.8472	0.41565		0.9	-0.96	-2.21	0.4	0.63	-0.248	0.58588	517.4	35.9411
	1.49	3.82	5.23	4.26083	4.45	5.46	5.34	6.06	4.51	4.89135	0.26358		1.85	-1.3	-1.65	-0.09	-0.02	-0.242	0.61444	517.6	35.5311
	1.51	4.25	3.85	5.0645	5.37	3.08	5.37	4.69	1.62	4.16181	0.45805		2.07	-0.36	-2.2	1.37	0.43	0.262	0.74071	517.2	34.6373
	1.52	4.53	2.33	3.68373	4.44	4.28	4.56	4.89	-0.84	3.48422	0.67935		1.4	-1.49	-2.2	0.13	0.97	-0.238	0.69623	517	33.0212
	1.54	3.17	3.97	3.97207	3.74	3.83	3.84	4.57	-2.38	3.08901	0.79286		1.61	-0.85	-1.14	0.75	-0.23	0.028	0.51116	516.4	32.6291
	1.55	5.37	2.3	4.09259	3.84	5.01	5.82	6.58	-2.01	3.87532	0.96164		1.8	-0.6	-2.73	2.45	-1.19	-0.054	0.96065	515.4	32.3506
	1.57	4.32	4.2	3.47486	5.87	2.66	4.6	5.43	-3.13	3.42811	1.003		1.79	-0.76	-0.35	1.31	-1.17	0.164	0.58544	513.4	32.9114
	1.58	4.6	5.18	4.26814	5.28	2.58	6.54	5.49	-4.45	3.68602	1.23031		2.17	-0.74	-1.09	1.83	-1.22	0.19	0.74503	512.4	33.013
	1.59	5.4	3.42	4.26764	4.81	4.96	5.5	3.65	-7.73	3.03471	1.561		2.63	-0.87	-0.88	1.41	-1.65	0.128	0.80861	510.8	33.3548
	1.61	2.33	5.54	3.17413	5	6.37	5.51	2.48	-6.07	3.04177	1.40858		2.19	-0.97	-0.16	1.19	-2.4	-0.03	0.80418	510.6	32.7072
	1.62	5.4	4.93	3.48998	4.59	5.34	5.83	4.84	-10.46	2.995	1.93785		1.5	-1.57	-1.25	0.42	-3.47	-0.874	0.8566	511.4	32.2871
	1.64	4.28	3.21	4.03907	6.82	5.65	5.99	4.51	-8.87	3.20363	1.77363		1.17	-1.82	-1.1	0.11	-2.76	-0.88	0.69459	514	32.204
	1.65	5.79	3.01	3.78555	3.36	5.89	5.46	2.84	-11.61	2.31569	2.03832		0.79	-2.21	-1.17	1.43	-2.66	-0.764	0.80868	516.8	32.446
	1.67	6.57	2.99	3.14812	4.76	3.91	5.75	5.63	-14.34	2.30226	2.41998		1.1	-2.41	-0.65	1.76	-2.84	-0.608	0.9153	519.8	32.9156
	1.68	8.2	2.37	3.29665	3.78	1.67	6.89	3.36	-15.45	1.76458	2.58207		0.75	-2.57	-0.71	0.99	-3.86	-1.08	0.94125	523	33.663
	1.69	6.37	1.55	3.52996	5.12	1.98	5.92	3.75	-15.42	1.6	2.50706		0.89	-3.09	-0.82	2.64	-4.32	-0.94	1.26938	527.6	34.8376
	1.71	5.71	1.6	3.24894	4.83	0.86	5.46	6.25	-15.48	1.55987	2.53133		-0.02	-3.69	0.43	2.3	-3.68	-0.932	1.18934	532.8	36.556
	1.72	6.8	-0.06	2.57202	2.37	2.36	5.56	4.65	-14.09	1.27025	2.32303		0.64	-3.95	-0.67	2.82	-3.97	-1.026	1.32119	538.4	38.3831
	1.74	7.85	0.17	1.92735	3.87	-0.63	6.79	6.21	-13.2	1.62342	2.38509		-0.06	-3.97	-0.65	2.53	-4.33	-1.296	1.28333	541.8	39.3629
	1.75	6.68	1.42	1.28784	1.9	0.82	4.99	5.23	-12.59	1.21723	2.11916		0.34	-4.98	0.09	2.8	-3.99	-1.148	1.45077	542.2	39.5075
																		--	--	--	--
																		--	--	--	--
																		--	--	--	--
																		--	--	--	--
																		--	--	--	--
																		--	--	--	--
																		--	--	--	--
																		--	--	--	--
																		--	--	--	--
																		--	--	--	--
																		--	--	--	--
																		--	--	--	--
																		--	--	--	--
																		--	--	--	--
																		--	--	--	--
																		--	--	--	--
																		--	--	--	--
																		--	--	--	--
																		--	--	--	--
																		--	--	--	--
																		--	--	--	--
																		--	--	--	--
																		--	--	--	--
																		--	--	--	--
																		--	--	--	--
																		--	--	--	--
																		--	--	--	--
																		--	--	--	--
																		--	--	--	--
																		--	--	--	--
																		--	--	--	--
																		--	--	--	--
																		--	--	--	--
																		--	--	--	--
																		--	--	--	--
																		--	--	--	--
																		--	--	--	--
																		--	--	--	--
																		--	--	--	--
																		--	--	--	--
																		--	--	--	--
																		--	--	--	--
																		--	--	--	--
																		--	--	--	--
																		--	--	--	--
																		--	--	--	--
																		--	--	--	--
																		--	--	--	--
																		--	--	--	--
																		--	--	--	--
																		--	--	--	--
																		--	--	--	--
																		--	--	--	--
																		--	--	--	--
																		--	--	--	--
																		--	--	--	--
																		--	--	--	--
																		--	--	--	--
																		--	--	--	--
																		--	--	--	--
																		--	--	--	--
																		--	--	--	--
																		--	--	--	--
																		--	--	--	--
																		--	--	--	--
																		--	--	--	--
																		--	--	--	--
																		--	--	--	--
																		--	--	--	--
																		--	--	--	--
																		--	--	--	--
																		--	--	--	--
																		--	--	--	--
																		--	--	--	--
																		--	--	--	--
																		--	--	--	--
																		--	--	--	--
																		--	--	--	--
																		--	--	--	--
																		--	--	--	--
																		--	--	--	--
																		--	--	--	--
																		--	--	--	--
																		--	--	--	--
																		--	--	--	--
																		--	--	--	--
																		--	--	--	--
																		--	--	--	--
																		--	--	--	--
																		--	--	--	--
																		--	--	--	--
																		--	--	--	--
																		--	--	--	--
																		--	--	--	--
																		--	--	--	--
																		--	--	--	--
																		--	--	--	--
																		--	--	--	--
																		--	--	--	--
																		--	--	--	--
																		--	--	--	--
																		--	--	--	--
																		--	--	--	--
																		--	--	--	--
																		--	--	--	--
																		--	--	--	--
																		--	--	--	--
																		--	--	--	--
																		--	--	--	--
																		--	--	--	--
																		--	--	--	--
																		--	--	--	--
																		--	--	--	--
																		--	--	--	--
																		--	--	--	--
																		--	--	--	--
																		--	--	--	--
																		--	--	--	--
																		--	--	--	--
																		--	--	--	--
																		--	--	--	--
																		--	--	--	--
																		--	--	--	--
																		--	--	--	--
																		--	--	--	--
																		--	--	--	--
																		--	--	--	--
																		--	--	--	--
																		--	--	--	--
																		--	--	--	--
																		--	--	--	--
																		--	--	--	--
																		--	--	--	--
																		--	--	--	--
																		--	--	--	--
																		--	--	--	--
																		--	--	--	--
																		--	--	--	--
																		--	--	--	--
																		--	--	--	--
																		--	--	--	--
																		--	--	--	--
																		--	--	--	--
																		--	--	--	--
																		--	--	--	--
																		--	--	--	--
																		--	--	--	--
																		--	--	--	--
																		--	--	--	--
																		--	--	--	--
																		--	--	--	--
																		--	--	--	--
																		--	--	--	--
																		--	--	--	--
																		--	--	--	--
																		--	--	--	--
																		--	--	--	--
																		--	--	--	--
																		--	--	--	--
																		--	--	--	--
																		--	--	--	--
																		--	--	--	--
																		--	--	--	--
																		--	--	--	--
																		--	--	--	--
																		--	--	--	--
																		--	--	--	--
																		--	--	--	--
																		--	--	--	--
																		--	--	--	--
																		--	--	--	--
																		--	--	--	--
																		--	--	--	--
																		--	--	--	--
																		--	--	--	--
																		--	--	--	--
																		--	--	--	--
																		--	--	--	--
																		--	--	--	--
																		--	--	--	--
																		--	--	--	--
																		--	--	--	--
																		--	--	--	--
																		--	--	--	--
																		--	--	--	--
																		--	--	--	--
																		--	--	--	--
																		--	--	--	--
																		--	--	--	--
																		--	--	--	--
																		--	--	--	--
																		--	--	--	--
																		--	--	--	--
																		--	--	--	--
																		--	--	--	--
																		--	--	--	--
																		--	--	--	--
																		--	--	--	--
																		--	--	--	--
																		--	--	--	--
																		--	--	--	--
																		--	--	--	--
																		--	--	--	--
																		--	--	--	--
																		--	--	--	--
																		--	--	--	--
																		--	--	--	--
																		--	--	--	--
																		--	--	--	--
																		--	--	--	--
																		--	--	--	--
																		--	--	--	--
																		--	--	--	--
																		--	--	--	--
																		--	--	--	--
																		--	--	--	--
																		--	--	--	--
																		--	--	--	--
																		--	--	--	--
																		--	--	--	--
																		--	--	--	--
																		--	--	--	--
																		--	--	--	--
																		--	--	--	--
																		--	--	--	--
																		--	--	--	--
																		--	--	--	--
																		--	--	--	--
																		--	--	--	--
																		--	--	--	--
																		--	--	--	--
																		--	--	--	--
																		--	--	--	--
																		--	--	--	--
																		--	--	--	--
																		--	--	--	--
																		--	--	--	--
																		--	--	--	--
																		--	--	--	--
																		--	--	--	--
																		--	--	--	--
																		--	--	--	--
																		--	--	--	--
																		--	--	--	--
																		--	--	--	--
																		--	--	--	--
																		--	--	--	--
																		--	--	--	--
																		--	--	--	--
																		--	--	--	--
																		--	--	--	--
																		--	--	--	--
																		--	--	--	--
																		--	--	--	--
																		--	--	--	--
																		--	--	--	--
																		--	--	--	--
																		--	--	--	--
																		--	--	--	--
																		--	--	--	--
																		--	--	--	--
																		--	--	--	--
																		--	--	--	--
																		--	--	--	--
																		--	--	--	--
																		--	--	--	--
																		--	--	--	--
																		--	--	--	--
																		--	--	--	--
																		--	--	--	--
																		--	--	--	--
																		--	--	--	--
																		--	--	--	--
																		--	--	--	--
																		--	--	--	--
																		--	--	--	--
																		--	--	--	--
																		--	--	--	--
																		--	--	--	--
																		--	--	--	--
																		--	--	--	--
																		--	--	--	--
																		--	--	--	--
																		--	--	--	--
																		--	--	--	--
																		--	--	--	--
																		--	--	--	--
																		--	--	--	--
																		--	--	--	--
																		--	--	--	--
																		--	--	--	--
																		--	--	--	--
																		--	--	--	--
																		--	--	--	--
																		--	--	--	--
																		--	--	--	--
																		--	--	--	--
																		--	--	--	--
																		--	--	--	--
																		--	--	--	--
																		--	--	--	--
																		--	--	--	--
																		--	--	--	--
																		--	--	--	--
																		--	--	--	--
																		--	--	--	--
																		--	--	--	--
																		--	--	--	--
																		--	--	--	--
																		--	--	--	--
																		--	--	--	--
																		--	--	--	--
																		--	--	--	--
																		--	--	--	--
																		--	--	--	--
																		--	--	--	--
																		--	--	--	--
																		--	--	--	--
																		--	--	--	--
																		--	--	--	--
																		--	--	--	--

## Sheet: Figure 6K
Amplitude			Duration
spontaneous	clamped		spontaneous	clamped
5.14	1.96		1.05	0.25
14.3	2.76		0.97	0.28
7.39	4.18		0.82	0.121
5.9	5.07		0.89	0.17
8.7	1.74		0.98	0.4
6.44			0.98
7.02			1.02
6.81			0.8
p-value:	0.0073		p-value:	7.97e-08

## Sheet: Figure 6L
	CCIV-1pA PrePulse	CCIV-1pA PrePulse_3	CCIV-1pA PrePulse_5	CCIV-1pA PrePulse_6	CCIV-1pA PrePulse_8	CCIV-1pA PrePulse_9	CCIV-1pA PrePulse_11	CCIV-1pA PrePulse_12	CCIV-1pA PrePulse_14	CCIV-1pA PrePulse_15	CCIV-1pA PrePulse_17	CCIV-1pA PrePulse_18	CCIV-1pA PrePulse_20	CCIV-1pA PrePulse_21	CCIV-1pA PrePulse_23	CCIV-1pA PrePulse_24	CCIV-1pA PrePulse_26	CCIV-1pA PrePulse_27	CCIV-1pA PrePulse_29	CCIV-1pA PrePulse_30
s	V	A	V	A	V	A	V	A	V	A	V	A	V	A	V	A	V	A	V	A
Time	Vmon-1	Imon-1	Vmon-1	Imon-1	Vmon-1	Imon-1	Vmon-1	Imon-1	Vmon-1	Imon-1	Vmon-1	Imon-1	Vmon-1	Imon-1	Vmon-1	Imon-1	Vmon-1	Imon-1	Vmon-1	Imon-1
0.005	-0.044166	-1.09113e-13	-0.0421656	-1.55876e-14	-0.0406965	-4.67628e-14	-0.0463852	-1.09113e-13	-0.0484169	-7.79381e-14	-0.0533243	-1.24701e-13	-0.055606	-9.35257e-14	-0.0471041	-1.55876e-14	-0.0496672	-4.67628e-14	-0.0589818	-9.35257e-14
0.0051	-0.0441973	-7.79381e-14	-0.0420718	0	-0.0407277	-6.23504e-14	-0.046229	-4.67628e-14	-0.0483544	-3.11752e-14	-0.0532305	-1.40288e-13	-0.0558873	0	-0.0471354	0	-0.049636	-9.35257e-14	-0.0589193	-4.67628e-14
0.0052	-0.0440097	-9.35257e-14	-0.0420718	-1.55876e-13	-0.040634	-6.23504e-14	-0.0462602	-6.23504e-14	-0.0482606	-1.09113e-13	-0.0533868	-7.79381e-14	-0.0556685	-1.55876e-14	-0.0470416	-7.79381e-14	-0.0495422	-3.11752e-14	-0.058888	-6.23504e-14
0.0053	-0.0441347	-9.35257e-14	-0.0418842	-9.35257e-14	-0.040759	-6.23504e-14	-0.0462915	-7.79381e-14	-0.0483857	-9.35257e-14	-0.0535118	1.55876e-14	-0.0554497	-1.71464e-13	-0.0471667	-9.35257e-14	-0.0496047	-9.35257e-14	-0.058763	-1.40288e-13
0.0054	-0.0441035	-3.11752e-14	-0.0417592	-1.24701e-13	-0.0407277	1.55876e-14	-0.0462602	-9.35257e-14	-0.0483232	-3.11752e-14	-0.0535118	-4.67628e-14	-0.0554185	-1.40288e-13	-0.0469479	-3.11752e-14	-0.049636	-1.55876e-14	-0.0588255	-9.35257e-14
0.0055	-0.0441035	-7.79381e-14	-0.041978	-1.40288e-13	-0.0408215	-4.67628e-14	-0.0462915	-6.23504e-14	-0.0484169	-9.35257e-14	-0.0535743	0	-0.0556373	0	-0.0469166	-1.40288e-13	-0.0497297	-1.55876e-14	-0.0587317	-9.35257e-14
0.0056	-0.044166	-9.35257e-14	-0.0420405	4.67628e-14	-0.0407903	-6.23504e-14	-0.046229	-9.35257e-14	-0.0483544	0	-0.0536681	-3.11752e-14	-0.0557623	3.11752e-14	-0.0471667	-1.09113e-13	-0.0497922	-1.55876e-14	-0.0587005	-1.09113e-13
0.0057	-0.0440722	-1.09113e-13	-0.041978	-4.67628e-14	-0.040634	-7.79381e-14	-0.0462915	-7.79381e-14	-0.0483544	-1.40288e-13	-0.0535118	-1.09113e-13	-0.0556998	1.55876e-14	-0.0469479	-1.55876e-14	-0.0495734	-7.79381e-14	-0.0588567	3.11752e-14
0.0058	-0.0440722	0	-0.0420718	-1.87051e-13	-0.0408215	-1.09113e-13	-0.0463227	-7.79381e-14	-0.0485107	-6.23504e-14	-0.053293	-9.35257e-14	-0.0556373	-1.40288e-13	-0.0470416	-1.40288e-13	-0.049761	-1.55876e-13	-0.0589193	3.11752e-14
0.0059	-0.0441347	-1.40288e-13	-0.0421343	0	-0.0405089	-3.11752e-14	-0.046229	-4.67628e-14	-0.0484169	-3.11752e-14	-0.0533555	-1.24701e-13	-0.0557936	-1.55876e-13	-0.0470104	-9.35257e-14	-0.0496672	0	-0.0589193	-9.35257e-14
0.006	-0.0441973	-4.67628e-14	-0.0420405	-1.55876e-14	-0.040759	-1.09113e-13	-0.0461352	-6.23504e-14	-0.0483544	-1.55876e-13	-0.0533555	-7.79381e-14	-0.055606	1.55876e-14	-0.0471667	-6.23504e-14	-0.0496985	-1.09113e-13	-0.0589505	-7.79381e-14
0.0061	-0.044041	-9.35257e-14	-0.041853	-9.35257e-14	-0.040884	-1.55876e-14	-0.046354	-1.09113e-13	-0.0483544	-6.23504e-14	-0.0534806	-4.67628e-14	-0.0556998	-1.40288e-13	-0.0471667	-4.67628e-14	-0.049636	-7.79381e-14	-0.0590443	-1.09113e-13
0.0062	-0.0442285	-6.23504e-14	-0.0420405	-1.09113e-13	-0.040884	1.55876e-14	-0.0462915	3.11752e-14	-0.0483232	-7.79381e-14	-0.0536368	1.55876e-14	-0.0556373	-7.79381e-14	-0.0471667	-4.67628e-14	-0.0496672	-3.11752e-14	-0.059013	-4.67628e-14
0.0063	-0.0441973	-3.11752e-14	-0.0420405	-3.11752e-14	-0.0409465	-4.67628e-14	-0.046354	-1.40288e-13	-0.0483857	-1.24701e-13	-0.053418	-1.55876e-14	-0.0557623	-9.35257e-14	-0.0469166	-9.35257e-14	-0.0495109	-1.40288e-13	-0.0591068	-6.23504e-14
0.0064	-0.0441347	-7.79381e-14	-0.0420093	-1.40288e-13	-0.0407903	-9.35257e-14	-0.0461977	-4.67628e-14	-0.0481356	0	-0.0536368	-1.40288e-13	-0.0557623	-4.67628e-14	-0.0469479	-2.33814e-13	-0.0497297	-6.23504e-14	-0.058888	-7.79381e-14
0.0065	-0.0442285	-4.67628e-14	-0.0421343	-7.79381e-14	-0.0408528	-1.09113e-13	-0.0463227	-1.09113e-13	-0.0485107	-7.79381e-14	-0.0533868	3.11752e-14	-0.0555748	-1.55876e-13	-0.0467603	-1.24701e-13	-0.0497297	-3.11752e-14	-0.0588255	-1.09113e-13
0.0066	-0.0439472	1.55876e-14	-0.0419155	-6.23504e-14	-0.0408528	-1.09113e-13	-0.0461352	-1.24701e-13	-0.0481356	0	-0.0534493	-1.24701e-13	-0.0555435	-1.55876e-13	-0.0469166	-1.55876e-14	-0.0496672	-4.67628e-14	-0.0588567	-9.35257e-14
0.0067	-0.0439159	-1.55876e-13	-0.0418217	-9.35257e-14	-0.040759	-6.23504e-14	-0.0463227	-9.35257e-14	-0.0481044	-2.33814e-13	-0.0534493	-7.79381e-14	-0.055606	-6.23504e-14	-0.0471354	-7.79381e-14	-0.0495422	-9.35257e-14	-0.058888	-9.35257e-14
0.0068	-0.0441035	-1.09113e-13	-0.0420405	-1.24701e-13	-0.0408528	-9.35257e-14	-0.0463227	-7.79381e-14	-0.0480731	-9.35257e-14	-0.0533868	-7.79381e-14	-0.0556685	-7.79381e-14	-0.0470729	1.55876e-14	-0.0494484	-1.24701e-13	-0.0588567	-9.35257e-14
0.0069	-0.0442285	1.55876e-14	-0.0419468	0	-0.040884	-1.55876e-14	-0.0463852	-1.24701e-13	-0.0482606	3.11752e-14	-0.0533868	-9.35257e-14	-0.0557936	-3.11752e-14	-0.0471041	-6.23504e-14	-0.0496985	-9.35257e-14	-0.058888	-4.67628e-14
0.007	-0.0440097	-4.67628e-14	-0.0421343	-9.35257e-14	-0.0409778	-6.23504e-14	-0.0465415	-3.11752e-14	-0.0484169	1.55876e-14	-0.0535431	-6.23504e-14	-0.0558248	-7.79381e-14	-0.0468853	-6.23504e-14	-0.0496672	3.11752e-14	-0.0589193	-3.11752e-14
0.0071	-0.044166	-7.79381e-14	-0.042103	-3.11752e-14	-0.0407903	-4.67628e-14	-0.0464165	-6.23504e-14	-0.0482919	-4.67628e-14	-0.0535431	0	-0.0557623	-7.79381e-14	-0.0469791	-1.09113e-13	-0.049636	-6.23504e-14	-0.058888	-9.35257e-14
0.0072	-0.0441347	-7.79381e-14	-0.0421656	-6.23504e-14	-0.040759	-1.55876e-13	-0.046354	-7.79381e-14	-0.0482606	-6.23504e-14	-0.0534806	-4.67628e-14	-0.0556998	-7.79381e-14	-0.0469791	-7.79381e-14	-0.0498235	-4.67628e-14	-0.0589193	-6.23504e-14
0.0073	-0.0439472	-6.23504e-14	-0.041978	-1.24701e-13	-0.0410716	-4.67628e-14	-0.0464165	-1.24701e-13	-0.0482606	-1.40288e-13	-0.0534806	-1.09113e-13	-0.0558248	-1.40288e-13	-0.0469479	-1.09113e-13	-0.049636	-4.67628e-14	-0.0588567	-1.55876e-14
0.0074	-0.0439785	-1.09113e-13	-0.0417905	-1.40288e-13	-0.040884	4.67628e-14	-0.0463227	-1.09113e-13	-0.0481669	-6.23504e-14	-0.0535431	-4.67628e-14	-0.0558248	-3.11752e-14	-0.0470416	-6.23504e-14	-0.0498235	-9.35257e-14	-0.0589193	-9.35257e-14
0.0075	-0.0440097	-4.67628e-14	-0.0419155	-1.09113e-13	-0.0409778	-1.40288e-13	-0.0461977	-4.67628e-14	-0.0481981	-6.23504e-14	-0.0535118	-9.35257e-14	-0.0556998	-7.79381e-14	-0.0469791	-9.35257e-14	-0.0496985	0	-0.0589818	-6.23504e-14
0.0076	-0.0440097	-9.35257e-14	-0.0419468	-4.67628e-14	-0.0409153	-7.79381e-14	-0.046229	-1.40288e-13	-0.0482294	-1.24701e-13	-0.0536993	-6.23504e-14	-0.0556685	-1.09113e-13	-0.0470729	0	-0.049886	-1.24701e-13	-0.0589193	-6.23504e-14
0.0077	-0.0441347	0	-0.0419155	-7.79381e-14	-0.0411028	-7.79381e-14	-0.0461664	-1.09113e-13	-0.0481669	0	-0.0533868	-6.23504e-14	-0.0555435	-7.79381e-14	-0.0470416	-1.09113e-13	-0.0495734	-4.67628e-14	-0.0589193	-7.79381e-14
0.0078	-0.0441035	1.55876e-14	-0.0419155	-1.24701e-13	-0.040884	-6.23504e-14	-0.0460727	-9.35257e-14	-0.0483232	-4.67628e-14	-0.0535431	-1.40288e-13	-0.0556685	-4.67628e-14	-0.0470104	-1.55876e-14	-0.049636	-1.87051e-13	-0.059013	-9.35257e-14
0.0079	-0.0441347	-1.55876e-13	-0.041728	-1.09113e-13	-0.0409153	-1.09113e-13	-0.046354	-4.67628e-14	-0.0482294	-6.23504e-14	-0.0536368	-4.67628e-14	-0.0556685	-1.55876e-14	-0.0471667	-1.55876e-14	-0.0496672	-3.11752e-14	-0.0589193	-9.35257e-14
0.008	-0.0444473	-6.23504e-14	-0.0417905	-6.23504e-14	-0.0409153	-3.11752e-14	-0.0464477	3.11752e-14	-0.0481981	-9.35257e-14	-0.0535431	3.11752e-14	-0.0556373	-9.35257e-14	-0.0471667	-6.23504e-14	-0.0496047	-7.79381e-14	-0.0590443	-6.23504e-14
0.0081	-0.044166	1.55876e-14	-0.042103	-6.23504e-14	-0.0409153	-1.09113e-13	-0.0463227	-4.67628e-14	-0.0481669	-1.24701e-13	-0.0536056	-9.35257e-14	-0.055731	-7.79381e-14	-0.0471041	-3.11752e-14	-0.049636	-6.23504e-14	-0.059013	4.67628e-14
0.0082	-0.0441973	-1.40288e-13	-0.0419468	4.67628e-14	-0.041009	-7.79381e-14	-0.0464477	-1.09113e-13	-0.0482606	-9.35257e-14	-0.0536681	-6.23504e-14	-0.0556685	-1.55876e-14	-0.0471354	-9.35257e-14	-0.0496047	-6.23504e-14	-0.0589505	-1.09113e-13
0.0083	-0.0440722	-9.35257e-14	-0.0419155	-1.24701e-13	-0.0410716	6.23504e-14	-0.0462915	-7.79381e-14	-0.0481981	-3.11752e-14	-0.0535431	-6.23504e-14	-0.0555748	-1.24701e-13	-0.0471979	-1.24701e-13	-0.0496047	-4.67628e-14	-0.0591068	-3.11752e-14
0.0084	-0.0441973	-1.09113e-13	-0.0419468	-1.09113e-13	-0.0408215	-4.67628e-14	-0.0464477	-1.40288e-13	-0.0484482	-9.35257e-14	-0.0535431	-1.24701e-13	-0.0555748	-6.23504e-14	-0.0470729	-4.67628e-14	-0.0496672	-3.11752e-14	-0.0591068	1.55876e-14
0.0085	-0.0440097	-4.67628e-14	-0.041853	-6.23504e-14	-0.0408215	-2.18227e-13	-0.0464165	3.11752e-14	-0.0484169	7.79381e-14	-0.0534806	-1.40288e-13	-0.055731	-6.23504e-14	-0.0470416	-1.09113e-13	-0.0496985	-1.09113e-13	-0.0589505	-3.11752e-14
0.0086	-0.044041	-1.09113e-13	-0.0418842	-7.79381e-14	-0.0406652	-4.67628e-14	-0.0466353	-3.11752e-14	-0.0482606	-7.79381e-14	-0.0535431	-6.23504e-14	-0.0556373	-3.11752e-14	-0.0471354	-1.87051e-13	-0.049636	-4.67628e-14	-0.0590443	-9.35257e-14
0.0087	-0.0440097	-3.11752e-14	-0.042103	-4.67628e-14	-0.040759	-1.24701e-13	-0.0465728	-4.67628e-14	-0.0482606	-1.55876e-13	-0.0535743	-7.79381e-14	-0.0556373	-4.67628e-14	-0.0470416	-3.11752e-14	-0.0496672	-1.09113e-13	-0.0591693	-6.23504e-14
0.0088	-0.0440722	0	-0.0420718	0	-0.0409153	-4.67628e-14	-0.0467291	-9.35257e-14	-0.0480731	-9.35257e-14	-0.0537306	-4.67628e-14	-0.055731	-6.23504e-14	-0.0470416	-1.71464e-13	-0.0496047	-9.35257e-14	-0.0589505	1.55876e-14
0.0089	-0.0441347	-4.67628e-14	-0.0420718	-9.35257e-14	-0.0409778	4.67628e-14	-0.0467916	-7.79381e-14	-0.0481356	-1.09113e-13	-0.0535743	0	-0.0556373	-3.11752e-14	-0.0471041	-4.67628e-14	-0.0496047	-1.09113e-13	-0.0591068	-1.24701e-13
0.009	-0.0442285	-7.79381e-14	-0.0419155	-4.67628e-14	-0.0408528	-7.79381e-14	-0.0465103	-3.11752e-14	-0.0483544	-4.67628e-14	-0.0536681	-7.79381e-14	-0.0556373	-4.67628e-14	-0.0469791	-4.67628e-14	-0.0495734	-3.11752e-14	-0.0589505	-6.23504e-14
0.0091	-0.0442598	-3.11752e-14	-0.0418842	-7.79381e-14	-0.0406027	-1.09113e-13	-0.046479	-2.80577e-13	-0.0482606	-3.11752e-14	-0.0535743	-9.35257e-14	-0.0553872	-1.24701e-13	-0.0471041	-1.09113e-13	-0.0496047	-6.23504e-14	-0.058888	-1.40288e-13
0.0092	-0.0441973	-1.55876e-13	-0.0420093	-4.67628e-14	-0.0404152	-1.24701e-13	-0.0464165	-1.55876e-14	-0.0483232	-6.23504e-14	-0.0534806	-1.09113e-13	-0.0556998	-1.24701e-13	-0.0469166	-9.35257e-14	-0.0495734	-1.24701e-13	-0.0587942	-1.24701e-13
0.0093	-0.0441347	-9.35257e-14	-0.041853	-3.11752e-14	-0.0406027	-1.40288e-13	-0.0464165	-7.79381e-14	-0.0483232	-4.67628e-14	-0.0535431	-1.24701e-13	-0.0556373	-1.55876e-14	-0.0469791	-1.09113e-13	-0.0496047	-4.67628e-14	-0.058763	-4.67628e-14
0.0094	-0.0441973	-1.09113e-13	-0.0419468	-1.24701e-13	-0.0408528	3.11752e-14	-0.046354	-4.67628e-14	-0.0481356	-9.35257e-14	-0.0536681	-7.79381e-14	-0.0555435	-1.09113e-13	-0.0468853	-4.67628e-14	-0.0496672	-6.23504e-14	-0.0588255	-4.67628e-14
0.0095	-0.0442598	-6.23504e-14	-0.0419468	-7.79381e-14	-0.0407903	3.11752e-14	-0.0464165	-9.35257e-14	-0.0483232	-1.40288e-13	-0.0536993	3.11752e-14	-0.0556373	-6.23504e-14	-0.0470416	-9.35257e-14	-0.0497297	-6.23504e-14	-0.0589505	3.11752e-14
0.0096	-0.044041	-6.23504e-14	-0.0419468	-6.23504e-14	-0.0408528	-9.35257e-14	-0.0465415	-4.67628e-14	-0.0484169	-7.79381e-14	-0.0536056	-7.79381e-14	-0.0555122	-6.23504e-14	-0.0471667	-1.55876e-14	-0.0495422	-6.23504e-14	-0.0589505	0
0.0097	-0.0440722	-2.18227e-13	-0.041978	-7.79381e-14	-0.0407277	-1.09113e-13	-0.0465728	0	-0.0484794	-3.11752e-14	-0.0536681	-1.24701e-13	-0.0555748	-1.09113e-13	-0.0472292	-1.55876e-14	-0.0497922	-9.35257e-14	-0.0590443	-7.79381e-14
0.0098	-0.044041	-4.67628e-14	-0.0418842	-7.79381e-14	-0.0407277	-9.35257e-14	-0.0465728	-9.35257e-14	-0.0482606	-4.67628e-14	-0.0537306	0	-0.0556998	6.23504e-14	-0.0472917	-4.67628e-14	-0.0498235	0	-0.0587942	-9.35257e-14
0.0099	-0.0442598	-7.79381e-14	-0.042103	-4.67628e-14	-0.0409153	-4.67628e-14	-0.0466353	-9.35257e-14	-0.0482919	-1.71464e-13	-0.0539181	-7.79381e-14	-0.0555748	-9.35257e-14	-0.0472292	-4.67628e-14	-0.049636	-4.67628e-14	-0.0590443	-9.35257e-14
0.01	-0.044166	0	-0.0421343	0	-0.040884	0	-0.0468853	-4.67628e-14	-0.0483857	-6.23504e-14	-0.0535743	1.55876e-14	-0.0556373	-1.40288e-13	-0.0471041	-1.09113e-13	-0.0498235	-6.23504e-14	-0.0589818	0
0.0101	-0.0441035	-1.24701e-13	-0.0420093	-1.24701e-13	-0.0406965	-1.09113e-13	-0.0465728	-7.79381e-14	-0.0482919	1.55876e-14	-0.0537306	-1.40288e-13	-0.055606	-3.11752e-14	-0.0471979	-1.71464e-13	-0.049761	1.55876e-14	-0.0588567	-1.55876e-13
0.0102	-0.0441347	-7.79381e-14	-0.0421343	-7.79381e-14	-0.041009	-1.24701e-13	-0.0467291	-1.87051e-13	-0.0483857	-1.55876e-13	-0.0536993	0	-0.055481	-9.35257e-14	-0.0471667	3.11752e-14	-0.0498548	-1.40288e-13	-0.0590443	-6.23504e-14
0.0103	-0.044041	-1.09113e-13	-0.0418842	-4.67628e-14	-0.0409465	1.55876e-14	-0.0466665	-6.23504e-14	-0.0482606	-6.23504e-14	-0.0535743	-9.35257e-14	-0.0556685	-4.67628e-14	-0.0471354	-9.35257e-14	-0.0498235	-7.79381e-14	-0.0589505	-3.11752e-14
0.0104	-0.0440722	-4.67628e-14	-0.0420405	-1.40288e-13	-0.0408215	-7.79381e-14	-0.0468228	-6.23504e-14	-0.0483544	-9.35257e-14	-0.0536368	-2.18227e-13	-0.0556373	0	-0.0470729	-7.79381e-14	-0.0496985	-9.35257e-14	-0.0590755	-7.79381e-14
0.0105	-0.0441973	-4.67628e-14	-0.042103	1.55876e-14	-0.040884	-1.40288e-13	-0.0468541	-4.67628e-14	-0.0483857	-6.23504e-14	-0.0536056	-4.67628e-14	-0.0554185	-1.09113e-13	-0.0470104	-6.23504e-14	-0.049886	-9.35257e-14	-0.0588567	-6.23504e-14
0.0106	-0.0439785	-3.11752e-14	-0.0419468	-3.11752e-14	-0.0408528	-6.23504e-14	-0.0467603	-9.35257e-14	-0.0483857	-9.35257e-14	-0.0535431	-6.23504e-14	-0.0555748	-1.40288e-13	-0.0470416	-1.09113e-13	-0.049761	-3.11752e-14	-0.0587942	-1.71464e-13
0.0107	-0.0440722	-9.35257e-14	-0.041853	-1.24701e-13	-0.0408528	-7.79381e-14	-0.0466978	-1.24701e-13	-0.0482919	-6.23504e-14	-0.0538244	-4.67628e-14	-0.0554497	-4.67628e-14	-0.0470729	0	-0.0499485	-1.24701e-13	-0.0588255	-1.24701e-13
0.0108	-0.0441035	0	-0.0418842	-1.09113e-13	-0.0408528	-1.40288e-13	-0.0467291	-1.24701e-13	-0.0483857	-4.67628e-14	-0.0537931	0	-0.0554185	-6.23504e-14	-0.0470104	-3.11752e-14	-0.0497297	-7.79381e-14	-0.0586379	-4.67628e-14
0.0109	-0.044041	-9.35257e-14	-0.0418217	-7.79381e-14	-0.040759	-7.79381e-14	-0.0466978	-9.35257e-14	-0.0483232	-6.23504e-14	-0.0536681	-7.79381e-14	-0.0554497	-4.67628e-14	-0.0470416	-3.11752e-14	-0.049636	-9.35257e-14	-0.0587005	-6.23504e-14
0.011	-0.0440722	-1.24701e-13	-0.0421343	1.55876e-14	-0.0407277	-9.35257e-14	-0.0466978	-1.40288e-13	-0.0482919	-7.79381e-14	-0.0537306	-7.79381e-14	-0.0553872	-4.67628e-14	-0.0471041	-1.24701e-13	-0.0496672	-1.09113e-13	-0.0586379	0
0.0111	-0.0439159	-1.09113e-13	-0.0420093	1.55876e-14	-0.040884	-6.23504e-14	-0.0465728	-6.23504e-14	-0.0482919	-9.35257e-14	-0.0536368	-1.09113e-13	-0.0553872	-4.67628e-14	-0.0470729	-6.23504e-14	-0.0495734	-4.67628e-14	-0.058763	-1.09113e-13
0.0112	-0.0440097	-1.09113e-13	-0.0420718	-1.40288e-13	-0.0408215	6.23504e-14	-0.0466665	-4.67628e-14	-0.0483857	-1.24701e-13	-0.0537619	-1.40288e-13	-0.0553247	-3.11752e-14	-0.0471979	-7.79381e-14	-0.0496985	-6.23504e-14	-0.0587942	-7.79381e-14
0.0113	-0.0441347	4.67628e-14	-0.0421656	-7.79381e-14	-0.0405715	-1.40288e-13	-0.0465415	-1.24701e-13	-0.0485732	-6.23504e-14	-0.0535431	-3.11752e-14	-0.0553872	-1.09113e-13	-0.0471041	-4.67628e-14	-0.0496985	-7.79381e-14	-0.0586379	-6.23504e-14
0.0114	-0.0440722	-4.67628e-14	-0.0421656	-7.79381e-14	-0.040759	-1.40288e-13	-0.0467603	-6.23504e-14	-0.0482919	3.11752e-14	-0.0536368	-1.40288e-13	-0.055356	-6.23504e-14	-0.0472604	-7.79381e-14	-0.049636	0	-0.0586067	-1.24701e-13
0.0115	-0.044166	-1.40288e-13	-0.0419468	-4.67628e-14	-0.0408215	-4.67628e-14	-0.0468228	0	-0.0483232	-7.79381e-14	-0.0535431	-4.67628e-14	-0.0555748	-3.11752e-14	-0.0471979	-7.79381e-14	-0.0496672	-1.09113e-13	-0.0586067	-1.09113e-13
0.0116	-0.044041	6.23504e-14	-0.0419155	-1.55876e-13	-0.040634	-4.67628e-14	-0.0466665	-3.11752e-14	-0.0482919	-6.23504e-14	-0.0536056	-4.67628e-14	-0.055356	-9.35257e-14	-0.0470729	-6.23504e-14	-0.0496672	-7.79381e-14	-0.0586379	-6.23504e-14
0.0117	-0.0439785	-1.24701e-13	-0.0419468	-1.24701e-13	-0.0407903	-9.35257e-14	-0.0466353	-1.09113e-13	-0.0483232	-9.35257e-14	-0.0534806	-9.35257e-14	-0.0553872	-1.24701e-13	-0.0471354	-1.40288e-13	-0.0495422	-1.71464e-13	-0.0585754	-1.09113e-13
0.0118	-0.0440722	-1.09113e-13	-0.0420093	-4.67628e-14	-0.0406965	-1.55876e-14	-0.0467291	-4.67628e-14	-0.0481356	-7.79381e-14	-0.0534493	-7.79381e-14	-0.0553872	-4.67628e-14	-0.0471979	-6.23504e-14	-0.0496047	-1.09113e-13	-0.0585754	-7.79381e-14
0.0119	-0.0440722	-3.11752e-14	-0.0418217	-7.79381e-14	-0.0406027	-9.35257e-14	-0.0466665	0	-0.0481669	-1.09113e-13	-0.0536681	-3.11752e-14	-0.0555435	0	-0.0471979	-4.67628e-14	-0.0495734	-4.67628e-14	-0.0586067	0
0.012	-0.0440722	-3.11752e-14	-0.0418842	-7.79381e-14	-0.040634	-1.40288e-13	-0.0466978	-1.09113e-13	-0.0484169	-3.11752e-14	-0.0535118	-6.23504e-14	-0.0554185	1.55876e-14	-0.0469791	-7.79381e-14	-0.0495734	-7.79381e-14	-0.0588255	-3.11752e-14
0.0121	-0.0441347	-1.24701e-13	-0.0419155	-1.55876e-14	-0.040634	-3.11752e-14	-0.0466353	-1.24701e-13	-0.0481981	-6.23504e-14	-0.0537306	-1.24701e-13	-0.0555748	-1.09113e-13	-0.0470104	-1.71464e-13	-0.0496672	-4.67628e-14	-0.0588567	-4.67628e-14
0.0122	-0.0440722	-6.23504e-14	-0.0420093	0	-0.0406652	-1.09113e-13	-0.0466978	-7.79381e-14	-0.0483857	-9.35257e-14	-0.0536056	4.67628e-14	-0.0555748	-4.67628e-14	-0.0469166	-1.55876e-13	-0.0495422	0	-0.0585754	-9.35257e-14
0.0123	-0.0439785	-1.09113e-13	-0.042103	-3.11752e-14	-0.040759	1.55876e-14	-0.0467603	-6.23504e-14	-0.0482606	-4.67628e-14	-0.0535118	-1.09113e-13	-0.0555748	-9.35257e-14	-0.0470416	-3.11752e-14	-0.0497922	-9.35257e-14	-0.0587005	-1.40288e-13
0.0124	-0.0440097	-9.35257e-14	-0.0420093	-1.09113e-13	-0.0407903	0	-0.0468853	-4.67628e-14	-0.0483544	-3.11752e-14	-0.0536368	-7.79381e-14	-0.0555122	-1.24701e-13	-0.0470104	-1.55876e-14	-0.0498235	0	-0.0586067	-4.67628e-14
0.0125	-0.0440722	-4.67628e-14	-0.0420405	-9.35257e-14	-0.0405715	-9.35257e-14	-0.0466978	-4.67628e-14	-0.0482294	-9.35257e-14	-0.0533243	-6.23504e-14	-0.0556685	-1.24701e-13	-0.0471354	-3.11752e-14	-0.0499173	-4.67628e-14	-0.058888	-7.79381e-14
0.0126	-0.0440722	-6.23504e-14	-0.0419155	-6.23504e-14	-0.0406027	-1.40288e-13	-0.0466353	-7.79381e-14	-0.0481981	-1.40288e-13	-0.0535118	-7.79381e-14	-0.0555748	-6.23504e-14	-0.0469166	-6.23504e-14	-0.0499485	-6.23504e-14	-0.0586692	1.55876e-14
0.0127	-0.0438222	-4.67628e-14	-0.0422593	-4.67628e-14	-0.0404464	-1.09113e-13	-0.0466978	-1.24701e-13	-0.0481981	-1.09113e-13	-0.053418	1.55876e-14	-0.0555435	-1.24701e-13	-0.0471667	-1.87051e-13	-0.0498548	-1.09113e-13	-0.0586692	-1.55876e-13
0.0128	-0.044166	-1.09113e-13	-0.042103	0	-0.0404777	-1.09113e-13	-0.0467916	-6.23504e-14	-0.0481044	-7.79381e-14	-0.0533868	-1.55876e-13	-0.0555122	-1.40288e-13	-0.0471667	0	-0.0499798	-1.24701e-13	-0.058763	-6.23504e-14
0.0129	-0.0440097	-4.67628e-14	-0.0421656	-1.55876e-13	-0.040634	3.11752e-14	-0.0465728	1.55876e-14	-0.0480419	-1.24701e-13	-0.0533555	-4.67628e-14	-0.0555748	-1.09113e-13	-0.0471041	-9.35257e-14	-0.0500423	-3.11752e-14	-0.0587942	-4.67628e-14
0.013	-0.0439472	-1.87051e-13	-0.0422281	-6.23504e-14	-0.040634	-1.55876e-14	-0.0467291	-1.87051e-13	-0.0481044	-9.35257e-14	-0.0535118	-4.67628e-14	-0.0552622	-7.79381e-14	-0.0470729	-7.79381e-14	-0.0499173	-4.67628e-14	-0.0588567	-9.35257e-14
0.0131	-0.0439472	-7.79381e-14	-0.042103	-1.24701e-13	-0.0406652	-6.23504e-14	-0.0466353	-1.55876e-14	-0.0481356	3.11752e-14	-0.0535431	-6.23504e-14	-0.0552622	-1.09113e-13	-0.0470104	-1.09113e-13	-0.0499798	-1.40288e-13	-0.0586379	-7.79381e-14
0.0132	-0.0439785	-4.67628e-14	-0.042103	-1.55876e-13	-0.040759	-1.55876e-14	-0.046604	-9.35257e-14	-0.0482919	-1.55876e-14	-0.053418	-7.79381e-14	-0.055356	-9.35257e-14	-0.0470729	-1.09113e-13	-0.0499485	-1.24701e-13	-0.0586692	-1.40288e-13
0.0133	-0.0439159	-1.55876e-13	-0.042103	-6.23504e-14	-0.0406652	-4.67628e-14	-0.0465103	-9.35257e-14	-0.0483544	-3.11752e-14	-0.0534493	-1.09113e-13	-0.0553247	0	-0.0471667	-7.79381e-14	-0.0499798	-3.11752e-14	-0.0586692	-9.35257e-14
0.0134	-0.044041	-6.23504e-14	-0.0422593	-7.79381e-14	-0.040634	-6.23504e-14	-0.0466665	-6.23504e-14	-0.0481981	-4.67628e-14	-0.0535743	1.55876e-14	-0.0551997	-1.24701e-13	-0.0470104	-6.23504e-14	-0.0499798	-4.67628e-14	-0.0587005	-1.09113e-13
0.0135	-0.0440097	-4.67628e-14	-0.0422593	-6.23504e-14	-0.040634	-7.79381e-14	-0.0467291	-3.11752e-14	-0.0481356	-1.55876e-13	-0.0536993	-6.23504e-14	-0.0551059	-1.09113e-13	-0.0469166	-9.35257e-14	-0.0501048	-9.35257e-14	-0.0585754	-6.23504e-14
0.0136	-0.0440097	-9.35257e-14	-0.0422281	-6.23504e-14	-0.0404152	-1.09113e-13	-0.0466353	-4.67628e-14	-0.0482294	-1.24701e-13	-0.0536993	-4.67628e-14	-0.0551997	-7.79381e-14	-0.0468853	-7.79381e-14	-0.0497297	-1.09113e-13	-0.0587317	-9.35257e-14
0.0137	-0.0439159	-9.35257e-14	-0.0419468	-1.09113e-13	-0.0406027	-9.35257e-14	-0.0467603	-1.09113e-13	-0.0481981	-4.67628e-14	-0.0535431	-6.23504e-14	-0.0552309	-7.79381e-14	-0.0466978	-1.55876e-13	-0.0499798	-1.55876e-13	-0.0585442	0
0.0138	-0.0438222	-1.09113e-13	-0.0419155	-2.02639e-13	-0.0408215	9.35257e-14	-0.0466665	-7.79381e-14	-0.0483857	0	-0.0535431	-1.24701e-13	-0.0554497	1.55876e-14	-0.0468541	-9.35257e-14	-0.0499173	1.55876e-14	-0.0585442	-9.35257e-14
0.0139	-0.0439785	-1.24701e-13	-0.042103	-6.23504e-14	-0.040759	3.11752e-14	-0.0466353	-1.40288e-13	-0.0483857	0	-0.0533555	-1.40288e-13	-0.0552935	-4.67628e-14	-0.0467291	-6.23504e-14	-0.0498235	-7.79381e-14	-0.0586692	-6.23504e-14
0.014	-0.0438222	-3.11752e-14	-0.0421656	0	-0.040634	-1.55876e-13	-0.0466353	-7.79381e-14	-0.0483857	-1.09113e-13	-0.0534806	-9.35257e-14	-0.0552622	-1.24701e-13	-0.0467603	-1.24701e-13	-0.0496672	-1.24701e-13	-0.0586379	-7.79381e-14
0.0141	-0.0441035	-3.11752e-14	-0.0420718	-3.11752e-14	-0.0405715	-9.35257e-14	-0.046479	-9.35257e-14	-0.0482919	-9.35257e-14	-0.0534493	-7.79381e-14	-0.0551997	-7.79381e-14	-0.0467291	-6.23504e-14	-0.0499173	-6.23504e-14	-0.0586067	-1.09113e-13
0.0142	-0.044041	1.55876e-14	-0.0418842	-1.55876e-13	-0.0407277	-1.09113e-13	-0.0465728	-6.23504e-14	-0.0482294	-1.40288e-13	-0.0533868	-1.09113e-13	-0.0554497	-7.79381e-14	-0.0466978	-9.35257e-14	-0.0501673	-3.11752e-14	-0.0587942	-6.23504e-14
0.0143	-0.0438847	-1.24701e-13	-0.0420718	-1.24701e-13	-0.040759	-4.67628e-14	-0.0465728	-9.35257e-14	-0.0482294	-1.09113e-13	-0.0533868	-4.67628e-14	-0.055481	4.67628e-14	-0.0466665	-3.11752e-14	-0.0501673	4.67628e-14	-0.0587005	3.11752e-14
0.0144	-0.0440722	-1.09113e-13	-0.042103	0	-0.0407277	-3.11752e-14	-0.0465728	-4.67628e-14	-0.0484169	1.55876e-14	-0.053418	-6.23504e-14	-0.0552622	-9.35257e-14	-0.0467916	-4.67628e-14	-0.0499798	-7.79381e-14	-0.0588255	-9.35257e-14
0.0145	-0.044166	-3.11752e-14	-0.0421343	-1.55876e-14	-0.0408215	-1.71464e-13	-0.0465103	-6.23504e-14	-0.0482606	1.55876e-14	-0.0534493	-3.11752e-14	-0.055356	-1.87051e-13	-0.0467916	-4.67628e-14	-0.0500735	-1.87051e-13	-0.0588567	-1.09113e-13
0.0146	-0.0441347	-6.23504e-14	-0.0421656	-1.09113e-13	-0.040884	-7.79381e-14	-0.046354	-7.79381e-14	-0.0481669	-1.87051e-13	-0.053418	0	-0.0554185	-1.55876e-14	-0.0467603	0	-0.0499173	-9.35257e-14	-0.0586067	-3.11752e-14
0.0147	-0.0439785	-9.35257e-14	-0.0419468	-6.23504e-14	-0.0408215	-7.79381e-14	-0.0466665	-7.79381e-14	-0.0482919	-3.11752e-14	-0.0534806	-7.79381e-14	-0.0551684	-9.35257e-14	-0.0467291	-1.40288e-13	-0.0500423	-7.79381e-14	-0.0585442	-1.24701e-13
0.0148	-0.0442598	-1.24701e-13	-0.0420718	-9.35257e-14	-0.0407277	-9.35257e-14	-0.0464165	6.23504e-14	-0.0483857	6.23504e-14	-0.0533868	-1.55876e-14	-0.0551372	-1.55876e-13	-0.0466665	-7.79381e-14	-0.0500735	-4.67628e-14	-0.0587005	-9.35257e-14
0.0149	-0.0441973	3.11752e-14	-0.0418842	-1.55876e-13	-0.040759	-7.79381e-14	-0.046479	-6.23504e-14	-0.0484169	-6.23504e-14	-0.053293	-7.79381e-14	-0.0552309	-1.09113e-13	-0.0467291	-9.35257e-14	-0.0499485	0	-0.058763	1.55876e-14
0.015	-0.0440722	-1.09113e-13	-0.0417592	-2.33814e-13	-0.0407903	-7.79381e-14	-0.0465415	-9.35257e-14	-0.0484482	0	-0.0533243	-7.79381e-14	-0.0552622	-1.09113e-13	-0.0468853	-3.11752e-14	-0.0499173	-1.09113e-13	-0.0588567	-6.23504e-14
0.0151	-0.044166	-1.40288e-13	-0.041978	-3.11752e-14	-0.0407277	-9.35257e-14	-0.0466353	1.55876e-14	-0.0485107	-6.23504e-14	-0.0536056	0	-0.0555122	-4.67628e-14	-0.0467916	-3.11752e-14	-0.049886	-7.79381e-14	-0.0586692	-4.67628e-14
0.0152	-0.044041	-7.79381e-14	-0.041728	-3.11752e-14	-0.040884	-1.09113e-13	-0.0466978	1.55876e-14	-0.0484482	-1.55876e-13	-0.0535431	-4.67628e-14	-0.0555122	3.11752e-14	-0.0467603	-4.67628e-14	-0.0496985	-1.09113e-13	-0.0586692	-6.23504e-14
0.0153	-0.0441973	-1.09113e-13	-0.0420405	-1.24701e-13	-0.040884	-4.67628e-14	-0.046354	-1.55876e-13	-0.0483544	-7.79381e-14	-0.0534493	-1.55876e-13	-0.0554185	-9.35257e-14	-0.0466665	-1.24701e-13	-0.0497922	-9.35257e-14	-0.0587005	-7.79381e-14
0.0154	-0.0441035	-1.09113e-13	-0.0418842	3.11752e-14	-0.0408215	0	-0.0465728	-1.55876e-13	-0.0484169	-7.79381e-14	-0.0534493	-7.79381e-14	-0.0552309	-1.24701e-13	-0.0466665	-9.35257e-14	-0.0496985	-7.79381e-14	-0.058763	-4.67628e-14
0.0155	-0.044041	-1.40288e-13	-0.0419155	0	-0.0406965	-1.24701e-13	-0.0465728	-3.11752e-14	-0.0482294	-9.35257e-14	-0.0533868	-9.35257e-14	-0.055356	-1.24701e-13	-0.0467603	-6.23504e-14	-0.0499485	1.55876e-14	-0.0586379	-1.24701e-13
0.0156	-0.0439785	-1.71464e-13	-0.0420093	-6.23504e-14	-0.0407277	-1.40288e-13	-0.0463852	-4.67628e-14	-0.0483232	-1.24701e-13	-0.053418	-6.23504e-14	-0.0552309	-4.67628e-14	-0.0466353	-6.23504e-14	-0.0500735	-1.55876e-14	-0.0586692	-7.79381e-14
0.0157	-0.0441347	-6.23504e-14	-0.0421656	-4.67628e-14	-0.0408215	1.55876e-14	-0.0466353	-1.09113e-13	-0.0483232	-1.09113e-13	-0.0534493	-1.09113e-13	-0.0552935	-9.35257e-14	-0.0467291	-1.55876e-13	-0.049886	0	-0.0588567	-4.67628e-14
0.0158	-0.0441035	-1.55876e-14	-0.0419468	-3.11752e-14	-0.0407277	-6.23504e-14	-0.0465728	0	-0.0481356	-7.79381e-14	-0.0533868	-7.79381e-14	-0.0551059	-7.79381e-14	-0.0464477	-6.23504e-14	-0.0500735	-1.24701e-13	-0.0588255	3.11752e-14
0.0159	-0.0442598	-7.79381e-14	-0.0418217	-1.24701e-13	-0.0407903	-9.35257e-14	-0.0465415	-7.79381e-14	-0.0480419	-1.40288e-13	-0.0533243	-1.24701e-13	-0.0552935	-7.79381e-14	-0.0464165	-1.09113e-13	-0.0500735	0	-0.0587942	-7.79381e-14
0.016	-0.0441973	-7.79381e-14	-0.041978	-1.55876e-13	-0.0407903	-9.35257e-14	-0.0466665	-1.55876e-14	-0.0481356	-1.55876e-13	-0.0533243	-6.23504e-14	-0.0552309	-4.67628e-14	-0.0463852	-7.79381e-14	-0.0499485	-1.55876e-13	-0.059013	-4.67628e-14
0.0161	-0.0441347	-6.23504e-14	-0.0420405	0	-0.0407903	-4.67628e-14	-0.0465728	-1.24701e-13	-0.0481669	0	-0.0533555	-6.23504e-14	-0.0551684	-9.35257e-14	-0.046604	-6.23504e-14	-0.0498235	-7.79381e-14	-0.0588255	-7.79381e-14
0.0162	-0.0441347	-6.23504e-14	-0.0420405	-3.11752e-14	-0.040759	-9.35257e-14	-0.046354	-1.24701e-13	-0.0482919	-3.11752e-14	-0.0533868	-9.35257e-14	-0.0551997	-7.79381e-14	-0.0463852	1.55876e-14	-0.0497922	-1.24701e-13	-0.0586379	-1.87051e-13
0.0163	-0.0441347	-1.24701e-13	-0.0419155	-7.79381e-14	-0.040759	-1.40288e-13	-0.0464477	-1.24701e-13	-0.0482294	-4.67628e-14	-0.0533243	-4.67628e-14	-0.0553872	-4.67628e-14	-0.0465415	-1.24701e-13	-0.0499173	-9.35257e-14	-0.0586692	-6.23504e-14
0.0164	-0.0440097	-9.35257e-14	-0.0418842	-7.79381e-14	-0.0407903	0	-0.0466665	-1.55876e-14	-0.0482294	-1.24701e-13	-0.0534493	-7.79381e-14	-0.0553247	-4.67628e-14	-0.0465728	-3.11752e-14	-0.0500423	0	-0.0587317	-9.35257e-14
0.0165	-0.0438222	-1.09113e-13	-0.0419155	-7.79381e-14	-0.0407903	-7.79381e-14	-0.0466665	0	-0.0480106	-4.67628e-14	-0.053418	-6.23504e-14	-0.0553247	-7.79381e-14	-0.0465728	-9.35257e-14	-0.050011	-3.11752e-14	-0.058888	-7.79381e-14
0.0166	-0.0441035	-1.09113e-13	-0.0418842	-1.09113e-13	-0.041009	-1.09113e-13	-0.0465415	-6.23504e-14	-0.0481669	-6.23504e-14	-0.0534806	-7.79381e-14	-0.0555122	-9.35257e-14	-0.046479	-4.67628e-14	-0.0499173	-9.35257e-14	-0.0588567	3.11752e-14
0.0167	-0.0441347	3.11752e-14	-0.0419155	-6.23504e-14	-0.0408528	1.55876e-14	-0.0466665	-1.24701e-13	-0.0482294	-6.23504e-14	-0.0533243	-6.23504e-14	-0.0555122	-4.67628e-14	-0.046604	-1.55876e-13	-0.0500735	-9.35257e-14	-0.0589505	-1.40288e-13
0.0168	-0.0441973	-1.09113e-13	-0.0419155	-7.79381e-14	-0.040634	-1.55876e-13	-0.0467603	-6.23504e-14	-0.0481669	-9.35257e-14	-0.0534493	-7.79381e-14	-0.055606	-4.67628e-14	-0.0465415	-6.23504e-14	-0.0499173	-4.67628e-14	-0.0589193	-6.23504e-14
0.0169	-0.0440722	1.55876e-14	-0.0416654	-1.24701e-13	-0.0406965	-1.87051e-13	-0.0465415	-4.67628e-14	-0.0482919	-7.79381e-14	-0.0533555	-3.11752e-14	-0.0555748	-6.23504e-14	-0.046229	-9.35257e-14	-0.0500423	-1.55876e-13	-0.058763	-9.35257e-14
0.017	-0.0441035	-9.35257e-14	-0.0417592	-9.35257e-14	-0.0408215	-4.67628e-14	-0.0466978	-9.35257e-14	-0.0483232	0	-0.0533243	-1.55876e-13	-0.0554185	-1.24701e-13	-0.046354	-1.40288e-13	-0.050011	-1.40288e-13	-0.059013	-1.40288e-13
0.0171	-0.0440097	-9.35257e-14	-0.0418217	-4.67628e-14	-0.040634	-7.79381e-14	-0.0466665	-4.67628e-14	-0.0482919	0	-0.0535118	-1.09113e-13	-0.0555748	-1.55876e-13	-0.0461039	-1.55876e-14	-0.050011	-7.79381e-14	-0.0588255	0
0.0172	-0.0439159	-1.09113e-13	-0.0416967	-1.09113e-13	-0.0408215	-6.23504e-14	-0.0467291	-7.79381e-14	-0.0482919	-1.24701e-13	-0.0533555	-3.11752e-14	-0.0555435	4.67628e-14	-0.0464165	-1.55876e-13	-0.0499798	-6.23504e-14	-0.0588567	-1.40288e-13
0.0173	-0.0437597	-7.79381e-14	-0.0417592	-6.23504e-14	-0.0407277	0	-0.0465728	-6.23504e-14	-0.0481044	-9.35257e-14	-0.053418	-1.09113e-13	-0.055606	-3.11752e-14	-0.0465728	0	-0.0500735	-3.11752e-14	-0.0587942	-7.79381e-14
0.0174	-0.0439785	-7.79381e-14	-0.0416967	3.11752e-14	-0.0408215	-7.79381e-14	-0.0465415	-1.40288e-13	-0.0481044	-3.11752e-14	-0.0535743	-4.67628e-14	-0.055356	-1.09113e-13	-0.0465103	-3.11752e-14	-0.0501048	-1.09113e-13	-0.0587942	-9.35257e-14
0.0175	-0.0439472	4.67628e-14	-0.0417592	-1.24701e-13	-0.0405402	-3.11752e-14	-0.046604	-7.79381e-14	-0.0480731	-6.23504e-14	-0.0534493	-6.23504e-14	-0.0554497	-1.09113e-13	-0.046354	-1.09113e-13	-0.0499798	-9.35257e-14	-0.058763	-7.79381e-14
0.0176	-0.0439159	0	-0.0418842	-1.24701e-13	-0.040884	-1.09113e-13	-0.0467291	3.11752e-14	-0.0481669	-9.35257e-14	-0.0534806	-4.67628e-14	-0.055606	-6.23504e-14	-0.0463227	-1.09113e-13	-0.0500735	-4.67628e-14	-0.0587942	-6.23504e-14
0.0177	-0.0440722	-1.09113e-13	-0.0417592	-4.67628e-14	-0.040759	1.55876e-14	-0.0466353	-9.35257e-14	-0.0483232	-4.67628e-14	-0.0534806	-6.23504e-14	-0.0553872	-3.11752e-14	-0.0463227	-1.24701e-13	-0.0501048	-1.09113e-13	-0.0587942	-9.35257e-14
0.0178	-0.0442285	0	-0.0418217	-6.23504e-14	-0.0409153	-9.35257e-14	-0.0466665	-6.23504e-14	-0.0482919	1.55876e-14	-0.0534806	-1.40288e-13	-0.0555435	-1.55876e-13	-0.0462602	-7.79381e-14	-0.050011	-6.23504e-14	-0.0588255	-9.35257e-14
0.0179	-0.0442598	-3.11752e-14	-0.0416967	-9.35257e-14	-0.040759	-6.23504e-14	-0.0468228	-3.11752e-14	-0.0483857	-6.23504e-14	-0.0536056	-6.23504e-14	-0.0554185	1.55876e-14	-0.0461664	-1.55876e-13	-0.0498548	-1.40288e-13	-0.0588255	-7.79381e-14
0.018	-0.0440722	-6.23504e-14	-0.0415717	-1.24701e-13	-0.040759	-7.79381e-14	-0.046604	-4.67628e-14	-0.0482294	-1.24701e-13	-0.053418	-4.67628e-14	-0.0554497	-1.09113e-13	-0.0461977	-7.79381e-14	-0.0499485	-1.55876e-13	-0.0588255	-4.67628e-14
0.0181	-0.0442285	-1.09113e-13	-0.0416654	-1.24701e-13	-0.040634	-1.09113e-13	-0.0466665	-1.87051e-13	-0.0482294	-6.23504e-14	-0.053293	-1.24701e-13	-0.0555435	-7.79381e-14	-0.0462915	-1.55876e-14	-0.0501361	1.55876e-14	-0.058763	-9.35257e-14
0.0182	-0.0440722	-3.11752e-14	-0.0417592	-3.11752e-14	-0.0406652	-1.24701e-13	-0.0466665	-1.40288e-13	-0.0483232	-1.09113e-13	-0.0533243	-1.24701e-13	-0.0556373	-3.11752e-14	-0.0463227	-7.79381e-14	-0.0501361	1.55876e-14	-0.0587005	-1.40288e-13
0.0183	-0.0443223	-1.09113e-13	-0.0416029	-9.35257e-14	-0.0406027	-7.79381e-14	-0.046604	-4.67628e-14	-0.0484169	-1.55876e-14	-0.0533555	-9.35257e-14	-0.055731	3.11752e-14	-0.0462915	-9.35257e-14	-0.0499485	-1.24701e-13	-0.0588255	-1.55876e-13
0.0184	-0.0443223	1.55876e-14	-0.0416342	-1.71464e-13	-0.040759	0	-0.0463852	-1.40288e-13	-0.0483232	-7.79381e-14	-0.0532305	-1.09113e-13	-0.0554185	-1.24701e-13	-0.0465415	-4.67628e-14	-0.0498548	-1.24701e-13	-0.0587005	-4.67628e-14
0.0185	-0.0443535	-4.67628e-14	-0.0417905	-4.67628e-14	-0.0406027	-3.11752e-14	-0.046479	-2.02639e-13	-0.0483544	-4.67628e-14	-0.0533243	-7.79381e-14	-0.0553247	-1.55876e-13	-0.0466353	-3.11752e-14	-0.0499798	-4.67628e-14	-0.0587942	-4.67628e-14
0.0186	-0.044291	-9.35257e-14	-0.0416654	-1.55876e-14	-0.0406652	-1.24701e-13	-0.0465728	1.55876e-14	-0.0482919	-7.79381e-14	-0.0534806	3.11752e-14	-0.055481	-1.40288e-13	-0.046354	-1.24701e-13	-0.0501048	-6.23504e-14	-0.0587005	-4.67628e-14
0.0187	-0.044166	-1.24701e-13	-0.0418842	-9.35257e-14	-0.0409153	0	-0.0466978	6.23504e-14	-0.0481669	-1.09113e-13	-0.0534493	0	-0.055481	-3.11752e-14	-0.0464165	-1.71464e-13	-0.0497922	-6.23504e-14	-0.0587317	-6.23504e-14
0.0188	-0.044041	-1.71464e-13	-0.041728	-1.09113e-13	-0.0407903	4.67628e-14	-0.046604	3.11752e-14	-0.0481981	-1.40288e-13	-0.0533868	-7.79381e-14	-0.055481	-6.23504e-14	-0.0465728	-3.11752e-14	-0.0498548	-1.24701e-13	-0.058888	-6.23504e-14
0.0189	-0.044041	-6.23504e-14	-0.0418842	-1.09113e-13	-0.0405715	-6.23504e-14	-0.0465415	-7.79381e-14	-0.0480731	-7.79381e-14	-0.0533868	-1.24701e-13	-0.0553872	-6.23504e-14	-0.0462602	-1.09113e-13	-0.0497922	-9.35257e-14	-0.058888	-6.23504e-14
0.019	-0.0441347	-3.11752e-14	-0.041853	3.11752e-14	-0.040759	-1.24701e-13	-0.046354	-2.33814e-13	-0.0481356	-1.24701e-13	-0.0536368	-3.11752e-14	-0.0553247	-1.24701e-13	-0.0465103	-1.40288e-13	-0.0496985	-7.79381e-14	-0.0586692	-1.09113e-13
0.0191	-0.0440097	-9.35257e-14	-0.0417592	-1.09113e-13	-0.0407903	-4.67628e-14	-0.046604	-1.09113e-13	-0.0482294	-6.23504e-14	-0.0535743	0	-0.0553872	-9.35257e-14	-0.0462915	0	-0.0497922	-3.11752e-14	-0.0587942	-1.24701e-13
0.0192	-0.0440097	-6.23504e-14	-0.041853	-1.24701e-13	-0.0408528	-1.55876e-14	-0.0466353	0	-0.0481981	0	-0.0536368	-1.24701e-13	-0.0554497	0	-0.046354	-1.71464e-13	-0.0497297	-1.55876e-14	-0.058888	-6.23504e-14
0.0193	-0.0442598	-4.67628e-14	-0.0419468	-6.23504e-14	-0.0408215	-1.09113e-13	-0.0466353	0	-0.0482919	-4.67628e-14	-0.0535431	-4.67628e-14	-0.0555122	-3.11752e-14	-0.0464165	1.55876e-14	-0.049761	-1.09113e-13	-0.0589193	-3.11752e-14
0.0194	-0.0441035	1.55876e-14	-0.0418842	-1.09113e-13	-0.0408528	-4.67628e-14	-0.0466665	0	-0.0483544	-4.67628e-14	-0.0534493	-1.40288e-13	-0.0553872	-9.35257e-14	-0.046354	-7.79381e-14	-0.0498548	0	-0.058888	-1.24701e-13
0.0195	-0.0440097	-1.55876e-13	-0.041853	-4.67628e-14	-0.0408528	-3.11752e-14	-0.0466665	-1.24701e-13	-0.0482606	-4.67628e-14	-0.0534493	-1.55876e-13	-0.0555122	-1.40288e-13	-0.0464165	-1.09113e-13	-0.0498548	-3.11752e-14	-0.0588567	-4.67628e-14
0.0196	-0.0441347	-1.24701e-13	-0.0418842	-6.23504e-14	-0.0407903	-9.35257e-14	-0.0467916	-3.11752e-14	-0.0481356	-1.55876e-13	-0.0535431	-1.55876e-14	-0.055481	-4.67628e-14	-0.0462915	-6.23504e-14	-0.049761	-7.79381e-14	-0.0588255	-7.79381e-14
0.0197	-0.0439472	-1.09113e-13	-0.0418217	-9.35257e-14	-0.040759	-1.09113e-13	-0.0466353	-6.23504e-14	-0.0482919	-1.24701e-13	-0.0534493	-6.23504e-14	-0.0554185	-7.79381e-14	-0.0462602	-1.24701e-13	-0.049886	-3.11752e-14	-0.0587005	-7.79381e-14
0.0198	-0.0439472	-9.35257e-14	-0.0418842	-7.79381e-14	-0.0407277	-4.67628e-14	-0.0465728	-1.40288e-13	-0.0482606	-1.09113e-13	-0.0534806	-1.09113e-13	-0.0556373	-1.24701e-13	-0.046229	-1.09113e-13	-0.0499798	-1.71464e-13	-0.0588255	-6.23504e-14
0.0199	-0.0440722	-1.55876e-14	-0.0419468	-7.79381e-14	-0.040884	-6.23504e-14	-0.046604	-6.23504e-14	-0.0481044	-9.35257e-14	-0.0533243	-9.35257e-14	-0.0555435	3.11752e-14	-0.046354	-4.67628e-14	-0.0500423	4.67628e-14	-0.058763	-4.67628e-14
0.02	-0.0440722	-4.67628e-14	-0.041978	-4.67628e-14	-0.040759	-3.11752e-14	-0.0466665	-7.79381e-14	-0.0483544	-9.35257e-14	-0.0535431	-7.79381e-14	-0.0556685	-3.11752e-14	-0.046229	0	-0.050011	-7.79381e-14	-0.0587942	-9.35257e-14
0.0201	-0.044041	-1.40288e-13	-0.041853	-9.35257e-14	-0.0408215	-4.67628e-14	-0.0465728	-9.35257e-14	-0.0482919	-3.11752e-14	-0.0535431	1.55876e-14	-0.0556998	-1.09113e-13	-0.0464477	-6.23504e-14	-0.049886	-1.24701e-13	-0.0587005	-4.67628e-14
0.0202	-0.0441035	-1.09113e-13	-0.0420093	-1.09113e-13	-0.0407903	-7.79381e-14	-0.0466665	-6.23504e-14	-0.0481356	-7.79381e-14	-0.0536368	-7.79381e-14	-0.0555748	-3.11752e-14	-0.046354	-6.23504e-14	-0.0501048	-9.35257e-14	-0.0587317	-1.09113e-13
0.0203	-0.0439472	-6.23504e-14	-0.0419155	0	-0.0405715	-1.09113e-13	-0.0466665	-7.79381e-14	-0.0482606	-1.55876e-13	-0.0533555	-4.67628e-14	-0.055606	-1.40288e-13	-0.0463227	-7.79381e-14	-0.0501048	-1.55876e-14	-0.0589193	-4.67628e-14
0.0204	-0.0441347	-6.23504e-14	-0.041853	-1.24701e-13	-0.0406652	-1.09113e-13	-0.046604	-7.79381e-14	-0.0483857	-7.79381e-14	-0.053293	-1.87051e-13	-0.0554185	-7.79381e-14	-0.0461352	-9.35257e-14	-0.0500735	-6.23504e-14	-0.0589193	1.55876e-14
0.0205	-0.044166	-6.23504e-14	-0.0420093	-9.35257e-14	-0.0407277	-4.67628e-14	-0.0467603	-3.11752e-14	-0.0481669	-1.55876e-14	-0.0534493	-3.11752e-14	-0.0555122	-1.09113e-13	-0.0463227	-9.35257e-14	-0.0500423	-6.23504e-14	-0.058888	-1.09113e-13
0.0206	-0.044166	-6.23504e-14	-0.0418217	-3.11752e-14	-0.0408215	0	-0.0465415	-3.11752e-14	-0.0482919	-9.35257e-14	-0.053293	-6.23504e-14	-0.0555748	-1.55876e-14	-0.0462915	0	-0.0499798	-1.09113e-13	-0.0586692	-1.24701e-13
0.0207	-0.0442285	-9.35257e-14	-0.0419155	-1.71464e-13	-0.0407903	4.67628e-14	-0.0463852	-1.87051e-13	-0.0483544	-6.23504e-14	-0.0533868	-1.09113e-13	-0.055481	-4.67628e-14	-0.0461977	-7.79381e-14	-0.0501361	-1.40288e-13	-0.058763	-1.24701e-13
0.0208	-0.044166	-7.79381e-14	-0.041853	-1.55876e-14	-0.040759	-7.79381e-14	-0.0464477	-1.40288e-13	-0.0483857	-3.11752e-14	-0.053293	-1.09113e-13	-0.0554497	-2.02639e-13	-0.0461977	-1.24701e-13	-0.0500735	3.11752e-14	-0.0589193	-9.35257e-14
0.0209	-0.0443535	-7.79381e-14	-0.0417592	-1.09113e-13	-0.0409465	-6.23504e-14	-0.0465415	-9.35257e-14	-0.0483857	-1.09113e-13	-0.0532305	-9.35257e-14	-0.0553872	-1.24701e-13	-0.0461977	-3.11752e-14	-0.0499798	-9.35257e-14	-0.058888	-4.67628e-14
0.021	-0.0442598	0	-0.041728	-1.09113e-13	-0.040884	1.55876e-14	-0.046479	0	-0.0486357	-6.23504e-14	-0.053168	-4.67628e-14	-0.055606	4.67628e-14	-0.046229	0	-0.0500735	-1.40288e-13	-0.058888	-4.67628e-14
0.0211	-0.0441973	-7.79381e-14	-0.0415404	-1.71464e-13	-0.0409465	-6.23504e-14	-0.0465728	-7.79381e-14	-0.0483232	1.55876e-14	-0.0532305	-9.35257e-14	-0.0556685	0	-0.046354	-7.79381e-14	-0.0501048	-7.79381e-14	-0.0588567	-9.35257e-14
0.0212	-0.0441035	-1.87051e-13	-0.0416029	-1.09113e-13	-0.0408528	-7.79381e-14	-0.0466353	-4.67628e-14	-0.0483544	-1.55876e-13	-0.0533868	-7.79381e-14	-0.0556373	-6.23504e-14	-0.0463852	-6.23504e-14	-0.0501048	-4.67628e-14	-0.0587005	-1.55876e-13
0.0213	-0.0441973	-1.40288e-13	-0.0417592	0	-0.0407903	-1.40288e-13	-0.046604	-4.67628e-14	-0.0483544	-1.71464e-13	-0.0535431	3.11752e-14	-0.0557623	-6.23504e-14	-0.0461664	-9.35257e-14	-0.0501673	-3.11752e-14	-0.0587942	-1.24701e-13
0.0214	-0.0441035	-3.11752e-14	-0.041728	0	-0.0408215	-1.55876e-13	-0.0466353	-7.79381e-14	-0.0482919	-1.09113e-13	-0.0532618	-9.35257e-14	-0.0555748	-1.09113e-13	-0.0462915	-1.24701e-13	-0.0502298	-6.23504e-14	-0.0586692	1.55876e-14
0.0215	-0.0442285	-9.35257e-14	-0.041728	-7.79381e-14	-0.040634	-1.55876e-13	-0.046604	-9.35257e-14	-0.0483232	-7.79381e-14	-0.0533243	-9.35257e-14	-0.0556373	-6.23504e-14	-0.0463227	-3.11752e-14	-0.0501048	0	-0.0588255	-7.79381e-14
0.0216	-0.044166	1.55876e-14	-0.041728	-9.35257e-14	-0.0408215	-1.09113e-13	-0.0465103	-1.09113e-13	-0.0485107	0	-0.0532305	-1.24701e-13	-0.0558248	-6.23504e-14	-0.0465103	-7.79381e-14	-0.0501361	-1.55876e-13	-0.0586692	-3.11752e-14
0.0217	-0.044166	-7.79381e-14	-0.041728	0	-0.0407903	-4.67628e-14	-0.0465103	-1.24701e-13	-0.0483544	0	-0.0531367	-1.09113e-13	-0.0556998	-3.11752e-14	-0.0464477	-3.11752e-14	-0.0500423	-4.67628e-14	-0.0587317	-1.09113e-13
0.0218	-0.0441035	-1.24701e-13	-0.0415717	-1.09113e-13	-0.0408215	-4.67628e-14	-0.0464477	-6.23504e-14	-0.0485732	-9.35257e-14	-0.0532305	-1.09113e-13	-0.055731	-6.23504e-14	-0.046604	-9.35257e-14	-0.0499173	-6.23504e-14	-0.0585754	-9.35257e-14
0.0219	-0.044291	-7.79381e-14	-0.041853	-7.79381e-14	-0.0406965	-6.23504e-14	-0.0464165	-7.79381e-14	-0.0485107	-7.79381e-14	-0.0534493	1.55876e-14	-0.055731	-4.67628e-14	-0.0465728	-3.11752e-14	-0.0501673	-7.79381e-14	-0.0584817	-9.35257e-14
0.022	-0.0441347	0	-0.0418217	1.55876e-14	-0.0407903	-9.35257e-14	-0.046604	-1.09113e-13	-0.0483857	-7.79381e-14	-0.053293	0	-0.0556685	-7.79381e-14	-0.0465103	-6.23504e-14	-0.0499485	0	-0.0585442	-9.35257e-14
0.0221	-0.044041	-1.24701e-13	-0.0417905	-6.23504e-14	-0.0407903	-3.11752e-14	-0.046604	3.11752e-14	-0.0484169	-1.40288e-13	-0.0535431	-4.67628e-14	-0.0558248	-1.09113e-13	-0.0465415	-1.40288e-13	-0.0501673	-9.35257e-14	-0.0586379	-6.23504e-14
0.0222	-0.0440722	-1.40288e-13	-0.0419468	-9.35257e-14	-0.0407903	-7.79381e-14	-0.0466978	-1.09113e-13	-0.0484794	-1.09113e-13	-0.0536056	4.67628e-14	-0.0557936	-6.23504e-14	-0.046604	-4.67628e-14	-0.050011	-4.67628e-14	-0.0586379	-7.79381e-14
0.0223	-0.0441035	0	-0.0419468	-7.79381e-14	-0.0407903	-9.35257e-14	-0.0464165	-9.35257e-14	-0.0484169	-4.67628e-14	-0.0535431	-6.23504e-14	-0.0557623	-7.79381e-14	-0.0466353	-6.23504e-14	-0.0499173	-6.23504e-14	-0.0585129	-1.55876e-14
0.0224	-0.0439785	-1.24701e-13	-0.0418842	-3.11752e-14	-0.040759	-9.35257e-14	-0.0464477	-1.24701e-13	-0.0484169	-3.11752e-14	-0.0533868	-1.71464e-13	-0.0555748	-1.09113e-13	-0.0465415	-1.24701e-13	-0.0501048	-6.23504e-14	-0.0585129	-1.40288e-13
0.0225	-0.0441035	-1.09113e-13	-0.0417905	-7.79381e-14	-0.0407903	-6.23504e-14	-0.046604	-3.11752e-14	-0.0483232	-9.35257e-14	-0.0534806	-1.40288e-13	-0.0556373	-1.09113e-13	-0.046354	-1.55876e-13	-0.0499173	-6.23504e-14	-0.0585754	0
0.0226	-0.0441035	-4.67628e-14	-0.0417592	-6.23504e-14	-0.0406965	-1.09113e-13	-0.0465415	0	-0.0483232	-1.87051e-13	-0.0534493	-6.23504e-14	-0.055606	-1.09113e-13	-0.0463227	-1.55876e-13	-0.0499173	-9.35257e-14	-0.0585442	-1.55876e-14
0.0227	-0.044166	-3.11752e-14	-0.0418217	-3.11752e-14	-0.040759	-9.35257e-14	-0.0465415	-9.35257e-14	-0.0486045	0	-0.0533243	-1.09113e-13	-0.0555748	0	-0.0464165	0	-0.0499485	-6.23504e-14	-0.0585442	-3.11752e-14
0.0228	-0.044166	-9.35257e-14	-0.0418842	-3.11752e-14	-0.0407277	-4.67628e-14	-0.0465415	-1.09113e-13	-0.0485107	-1.55876e-14	-0.0536368	3.11752e-14	-0.0558873	-1.55876e-14	-0.0462915	-4.67628e-14	-0.0499173	-7.79381e-14	-0.0585129	-9.35257e-14
0.0229	-0.0440722	-6.23504e-14	-0.0419468	-4.67628e-14	-0.0405402	-1.09113e-13	-0.0466665	-6.23504e-14	-0.0483857	-1.71464e-13	-0.0536056	-1.55876e-14	-0.0556685	-4.67628e-14	-0.046354	-4.67628e-14	-0.049886	-6.23504e-14	-0.0583879	-6.23504e-14
0.023	-0.0441035	-9.35257e-14	-0.041853	-1.55876e-14	-0.0407277	-1.24701e-13	-0.0464477	1.55876e-14	-0.0485107	-9.35257e-14	-0.0536368	-9.35257e-14	-0.0556998	-1.24701e-13	-0.0464477	-1.55876e-14	-0.050011	-6.23504e-14	-0.0585129	-9.35257e-14
0.0231	-0.0437909	-1.24701e-13	-0.0420405	-9.35257e-14	-0.0407903	-3.11752e-14	-0.0466353	-1.55876e-13	-0.048542	-1.55876e-14	-0.0535431	-6.23504e-14	-0.0556998	-6.23504e-14	-0.0463852	-3.11752e-14	-0.0500423	-4.67628e-14	-0.0583879	-1.24701e-13
0.0232	-0.0441347	-1.40288e-13	-0.0420093	-9.35257e-14	-0.040759	-9.35257e-14	-0.0468228	4.67628e-14	-0.0483544	-4.67628e-14	-0.0536681	-7.79381e-14	-0.0557623	-7.79381e-14	-0.0464477	-6.23504e-14	-0.0501361	-7.79381e-14	-0.0584817	-6.23504e-14
0.0233	-0.0441347	3.11752e-14	-0.041978	-6.23504e-14	-0.0408528	-1.55876e-14	-0.0466978	-4.67628e-14	-0.0481981	-1.87051e-13	-0.0534806	-9.35257e-14	-0.055606	-9.35257e-14	-0.0462602	-9.35257e-14	-0.0500423	-6.23504e-14	-0.0586067	-4.67628e-14
0.0234	-0.0439785	-7.79381e-14	-0.0420405	-1.09113e-13	-0.0408215	-6.23504e-14	-0.0466353	-2.02639e-13	-0.0485107	-1.40288e-13	-0.0533868	-1.71464e-13	-0.055606	-9.35257e-14	-0.046229	-1.09113e-13	-0.0499485	-9.35257e-14	-0.0584504	0
0.0235	-0.0439785	-7.79381e-14	-0.0418842	-1.55876e-14	-0.0408215	-1.55876e-14	-0.0467291	-1.24701e-13	-0.0485732	6.23504e-14	-0.0535431	-6.23504e-14	-0.055606	-1.24701e-13	-0.046229	-9.35257e-14	-0.0499798	-9.35257e-14	-0.0585129	-9.35257e-14
0.0236	-0.0441347	-1.24701e-13	-0.0420718	-7.79381e-14	-0.0408528	-1.24701e-13	-0.0467291	-4.67628e-14	-0.0484169	-4.67628e-14	-0.0533868	-7.79381e-14	-0.0558561	-3.11752e-14	-0.046229	-7.79381e-14	-0.0499485	-3.11752e-14	-0.0585754	-7.79381e-14
0.0237	-0.0442285	1.55876e-14	-0.041853	-7.79381e-14	-0.0409153	-7.79381e-14	-0.0468228	-4.67628e-14	-0.0486045	-1.09113e-13	-0.0533243	-2.02639e-13	-0.0556998	6.23504e-14	-0.0461664	-1.09113e-13	-0.049886	-9.35257e-14	-0.0582316	-1.09113e-13
0.0238	-0.0439785	0	-0.0419155	-1.09113e-13	-0.0408215	-6.23504e-14	-0.0468853	-3.11752e-14	-0.048542	-3.11752e-14	-0.0533868	-9.35257e-14	-0.0558248	-1.24701e-13	-0.046229	-9.35257e-14	-0.0498548	-7.79381e-14	-0.0583879	-1.87051e-13
0.0239	-0.0439159	-1.55876e-13	-0.0419155	-1.40288e-13	-0.0409153	-7.79381e-14	-0.0466353	-6.23504e-14	-0.0486982	-6.23504e-14	-0.0535118	3.11752e-14	-0.0558248	-3.11752e-14	-0.046479	1.55876e-14	-0.0497922	-4.67628e-14	-0.0585442	1.55876e-14
0.024	-0.0438847	-9.35257e-14	-0.0418842	-1.24701e-13	-0.0409465	-7.79381e-14	-0.0468228	-1.55876e-13	-0.048667	-9.35257e-14	-0.0536056	-3.11752e-14	-0.0555748	-1.09113e-13	-0.0462915	1.55876e-14	-0.0498548	-9.35257e-14	-0.0582941	0
0.0241	-0.0441347	-6.23504e-14	-0.0416029	-1.40288e-13	-0.0409778	-9.35257e-14	-0.0467916	-3.11752e-14	-0.0487295	-7.79381e-14	-0.0536681	-9.35257e-14	-0.0555122	-1.40288e-13	-0.0462915	-1.40288e-13	-0.049886	-7.79381e-14	-0.0585129	-1.24701e-13
0.0242	-0.0440722	-4.67628e-14	-0.0417592	-1.55876e-13	-0.040759	-7.79381e-14	-0.0466978	-6.23504e-14	-0.0486357	-6.23504e-14	-0.0536681	-3.11752e-14	-0.0556685	-7.79381e-14	-0.046354	-6.23504e-14	-0.0499173	-7.79381e-14	-0.0584191	0
0.0243	-0.0441973	-4.67628e-14	-0.041728	-3.11752e-14	-0.040759	-1.40288e-13	-0.0467603	-9.35257e-14	-0.0487608	-1.09113e-13	-0.0535431	-6.23504e-14	-0.0556685	-6.23504e-14	-0.0463227	-4.67628e-14	-0.0498548	-3.11752e-14	-0.0583566	-1.09113e-13
0.0244	-0.0441035	-1.09113e-13	-0.0415404	-1.09113e-13	-0.0406965	-6.23504e-14	-0.0467603	-3.11752e-14	-0.048542	0	-0.0536056	-9.35257e-14	-0.0556685	-6.23504e-14	-0.0463227	-1.55876e-13	-0.0498235	-1.09113e-13	-0.0583254	-9.35257e-14
0.0245	-0.0441347	-3.11752e-14	-0.0416967	-6.23504e-14	-0.040634	-3.11752e-14	-0.0466665	-1.24701e-13	-0.0485732	-1.24701e-13	-0.0535743	-4.67628e-14	-0.055606	-1.09113e-13	-0.0462915	-6.23504e-14	-0.0495734	-9.35257e-14	-0.0584191	-6.23504e-14
0.0246	-0.0441035	-1.09113e-13	-0.0415717	-6.23504e-14	-0.040634	-7.79381e-14	-0.0467291	-1.71464e-13	-0.048542	-1.24701e-13	-0.0536056	-7.79381e-14	-0.055606	-9.35257e-14	-0.0462915	-7.79381e-14	-0.0496985	-1.24701e-13	-0.0584191	-3.11752e-14
0.0247	-0.0438847	-1.24701e-13	-0.0416654	0	-0.0406027	-3.11752e-14	-0.0467291	-6.23504e-14	-0.048542	-4.67628e-14	-0.0536056	-6.23504e-14	-0.055731	-7.79381e-14	-0.0462602	-1.09113e-13	-0.049636	-7.79381e-14	-0.0584191	1.55876e-14
0.0248	-0.0440722	-9.35257e-14	-0.0416967	-4.67628e-14	-0.0406965	-1.09113e-13	-0.0466978	-7.79381e-14	-0.0485732	-9.35257e-14	-0.0536681	-9.35257e-14	-0.055606	-6.23504e-14	-0.0461664	-4.67628e-14	-0.0495422	-4.67628e-14	-0.0584504	-4.67628e-14
0.0249	-0.0440722	-4.67628e-14	-0.0416342	-1.09113e-13	-0.040759	-7.79381e-14	-0.0467291	-3.11752e-14	-0.048542	-6.23504e-14	-0.0536681	-6.23504e-14	-0.0556373	-6.23504e-14	-0.0461352	-1.24701e-13	-0.0494172	-6.23504e-14	-0.0585129	-1.40288e-13
0.025	-0.044041	-3.11752e-14	-0.0416967	-9.35257e-14	-0.0406027	3.11752e-14	-0.0466665	-9.35257e-14	-0.0483232	-1.24701e-13	-0.0535431	-9.35257e-14	-0.0556685	-9.35257e-14	-0.0461977	-7.79381e-14	-0.0494797	-7.79381e-14	-0.0584504	-4.67628e-14
0.0251	-0.0441973	-9.35257e-14	-0.0415717	1.55876e-14	-0.0406965	-1.24701e-13	-0.0466353	-1.40288e-13	-0.0483857	-1.40288e-13	-0.0536993	-6.23504e-14	-0.055606	-1.09113e-13	-0.0461664	-1.09113e-13	-0.0494484	-1.55876e-14	-0.0583566	-4.67628e-14
0.0252	-0.0441035	1.55876e-14	-0.0416654	-1.09113e-13	-0.040759	-9.35257e-14	-0.0465728	-3.11752e-14	-0.0485107	-4.67628e-14	-0.0535743	0	-0.0555435	-1.24701e-13	-0.046229	-7.79381e-14	-0.0496672	1.55876e-14	-0.0583879	-1.24701e-13
0.0253	-0.044166	-4.67628e-14	-0.0415092	-7.79381e-14	-0.040759	4.67628e-14	-0.0466353	-6.23504e-14	-0.0484169	-7.79381e-14	-0.053418	-1.40288e-13	-0.055606	-1.24701e-13	-0.0461039	-3.11752e-14	-0.0496985	1.55876e-14	-0.0584504	-6.23504e-14
0.0254	-0.0441347	-9.35257e-14	-0.0416654	-6.23504e-14	-0.0407277	0	-0.0466353	-7.79381e-14	-0.0483857	-4.67628e-14	-0.0534806	-9.35257e-14	-0.0556373	0	-0.046229	-9.35257e-14	-0.0494797	-6.23504e-14	-0.0583566	0
0.0255	-0.0441347	-6.23504e-14	-0.0416967	1.55876e-14	-0.040634	-1.24701e-13	-0.0467603	0	-0.0485107	-4.67628e-14	-0.0536681	0	-0.055731	-1.09113e-13	-0.0464477	-3.11752e-14	-0.0495109	-1.24701e-13	-0.0585129	-1.55876e-14
0.0256	-0.0441035	-9.35257e-14	-0.0416654	-9.35257e-14	-0.0407277	-6.23504e-14	-0.0466353	1.55876e-14	-0.0485107	-6.23504e-14	-0.0536681	-1.55876e-14	-0.0557623	3.11752e-14	-0.0463227	-6.23504e-14	-0.0495734	-3.11752e-14	-0.0585754	-1.55876e-14
0.0257	-0.044166	-7.79381e-14	-0.0416654	-4.67628e-14	-0.040759	-3.11752e-14	-0.0466665	-1.71464e-13	-0.0487295	-7.79381e-14	-0.0535431	-9.35257e-14	-0.0555748	-6.23504e-14	-0.0461664	-9.35257e-14	-0.0495109	-7.79381e-14	-0.0584191	-1.09113e-13
0.0258	-0.0442285	-4.67628e-14	-0.0416654	-7.79381e-14	-0.0407903	-6.23504e-14	-0.0468541	-1.09113e-13	-0.0486357	-3.11752e-14	-0.053418	-1.24701e-13	-0.0555435	-1.55876e-13	-0.0461977	-1.40288e-13	-0.0497297	-6.23504e-14	-0.0586692	-1.09113e-13
0.0259	-0.044166	0	-0.0416967	-6.23504e-14	-0.0408215	-6.23504e-14	-0.0468853	-3.11752e-14	-0.0486357	-1.09113e-13	-0.0535743	-1.55876e-13	-0.0556373	-9.35257e-14	-0.0462915	-9.35257e-14	-0.049636	-4.67628e-14	-0.0587317	6.23504e-14
0.026	-0.0440722	-1.55876e-13	-0.0417592	-1.09113e-13	-0.0406027	-1.40288e-13	-0.0468853	-1.55876e-14	-0.0486045	-9.35257e-14	-0.0534493	0	-0.055731	-1.55876e-14	-0.0462915	-4.67628e-14	-0.0496985	-1.09113e-13	-0.0587942	-9.35257e-14
0.0261	-0.044291	-9.35257e-14	-0.0416967	-7.79381e-14	-0.0406027	-1.24701e-13	-0.0464477	-9.35257e-14	-0.048542	-9.35257e-14	-0.053418	-6.23504e-14	-0.0556685	-3.11752e-14	-0.046229	0	-0.0496985	-4.67628e-14	-0.058763	-6.23504e-14
0.0262	-0.0441035	0	-0.0416029	-4.67628e-14	-0.0406652	-6.23504e-14	-0.0466353	-2.33814e-13	-0.048667	-1.40288e-13	-0.0533868	-3.11752e-14	-0.055606	-4.67628e-14	-0.0462602	-9.35257e-14	-0.0496047	-1.40288e-13	-0.0588255	-1.09113e-13
0.0263	-0.0441035	-1.24701e-13	-0.041728	-7.79381e-14	-0.0406027	0	-0.0465728	-4.67628e-14	-0.0486357	-3.11752e-14	-0.0533868	-1.09113e-13	-0.0554185	-1.55876e-13	-0.0461352	-9.35257e-14	-0.0496047	-7.79381e-14	-0.0588567	-7.79381e-14
0.0264	-0.0442285	-1.40288e-13	-0.0416967	0	-0.0405715	-7.79381e-14	-0.0466353	3.11752e-14	-0.048542	-6.23504e-14	-0.0533555	-1.40288e-13	-0.0554497	-7.79381e-14	-0.0461352	-1.09113e-13	-0.0496985	-9.35257e-14	-0.058888	-3.11752e-14
0.0265	-0.0439472	-4.67628e-14	-0.0416967	-1.55876e-13	-0.040759	-7.79381e-14	-0.0467603	-3.11752e-14	-0.048667	-1.24701e-13	-0.0534806	-9.35257e-14	-0.0554497	-9.35257e-14	-0.046229	-6.23504e-14	-0.0495734	-7.79381e-14	-0.0589505	-6.23504e-14
0.0266	-0.0440097	-1.55876e-13	-0.0416654	-6.23504e-14	-0.0408215	-1.55876e-14	-0.0467916	-6.23504e-14	-0.0486982	0	-0.0533555	-3.11752e-14	-0.0555435	-4.67628e-14	-0.0461977	-7.79381e-14	-0.0495422	-7.79381e-14	-0.0589505	0
0.0267	-0.0440097	-1.09113e-13	-0.0415717	-1.09113e-13	-0.0407903	-4.67628e-14	-0.0466353	-3.11752e-14	-0.0488233	-7.79381e-14	-0.0533555	-7.79381e-14	-0.0555122	-9.35257e-14	-0.046229	0	-0.0496672	-1.09113e-13	-0.0588255	-9.35257e-14
0.0268	-0.0441347	-3.11752e-14	-0.0416342	-1.09113e-13	-0.040884	-9.35257e-14	-0.0467291	-1.40288e-13	-0.0487295	-3.11752e-14	-0.0532618	-7.79381e-14	-0.0555748	-6.23504e-14	-0.0462602	-9.35257e-14	-0.049636	0	-0.0587942	-1.55876e-13
0.0269	-0.0441035	-3.11752e-14	-0.0415404	-9.35257e-14	-0.0409153	1.55876e-14	-0.0467916	-3.11752e-14	-0.0489483	-1.09113e-13	-0.0533243	-1.24701e-13	-0.055606	-3.11752e-14	-0.0462915	-1.55876e-14	-0.0496672	-3.11752e-14	-0.0588567	-9.35257e-14
0.027	-0.0441347	-1.24701e-13	-0.0416342	-1.09113e-13	-0.0408215	-1.40288e-13	-0.0468228	-6.23504e-14	-0.0487295	-9.35257e-14	-0.053293	-9.35257e-14	-0.0554497	-7.79381e-14	-0.0464165	-6.23504e-14	-0.049761	-7.79381e-14	-0.0588255	-1.09113e-13
0.0271	-0.0442285	0	-0.0416029	-4.67628e-14	-0.040759	-1.87051e-13	-0.0466978	-7.79381e-14	-0.0488233	-1.40288e-13	-0.0532305	-4.67628e-14	-0.055356	-1.40288e-13	-0.0462602	-6.23504e-14	-0.0498235	-6.23504e-14	-0.0586067	-1.09113e-13
0.0272	-0.0441035	-9.35257e-14	-0.0414154	-1.09113e-13	-0.040884	-7.79381e-14	-0.0466353	-1.55876e-13	-0.0485732	-1.24701e-13	-0.0533868	-9.35257e-14	-0.0555435	-1.40288e-13	-0.0464477	-7.79381e-14	-0.0496985	-4.67628e-14	-0.0586379	-1.55876e-13
0.0273	-0.0440097	-1.09113e-13	-0.0415717	-6.23504e-14	-0.0407277	-7.79381e-14	-0.0467603	-7.79381e-14	-0.0486357	-1.71464e-13	-0.0535431	-1.55876e-14	-0.0555748	1.55876e-14	-0.0465415	0	-0.049886	-1.24701e-13	-0.0586379	-7.79381e-14
0.0274	-0.044041	-1.24701e-13	-0.0414466	-4.67628e-14	-0.040884	-1.40288e-13	-0.0467916	1.55876e-14	-0.0486982	-3.11752e-14	-0.0533243	-1.55876e-14	-0.0555748	-3.11752e-14	-0.0463227	-3.11752e-14	-0.049761	1.55876e-14	-0.0587317	-1.55876e-14
0.0275	-0.0441347	-3.11752e-14	-0.0416029	-9.35257e-14	-0.0409153	0	-0.0466353	-7.79381e-14	-0.0486357	-3.11752e-14	-0.0531992	-7.79381e-14	-0.0555748	-3.11752e-14	-0.0462915	-1.40288e-13	-0.0496985	-1.24701e-13	-0.0586692	-9.35257e-14
0.0276	-0.044041	-3.11752e-14	-0.0416967	1.55876e-14	-0.0408528	-7.79381e-14	-0.0465103	-1.09113e-13	-0.0485732	-9.35257e-14	-0.0532305	-1.55876e-13	-0.0554497	-9.35257e-14	-0.0464165	-1.24701e-13	-0.0496672	-1.09113e-13	-0.0586067	-1.40288e-13
0.0277	-0.0441347	-9.35257e-14	-0.0416654	-6.23504e-14	-0.040759	-7.79381e-14	-0.0466978	-1.09113e-13	-0.048667	-1.40288e-13	-0.0532618	-7.79381e-14	-0.0558248	1.55876e-14	-0.0461664	-4.67628e-14	-0.0496047	-1.40288e-13	-0.0587942	-3.11752e-14
0.0278	-0.044041	-6.23504e-14	-0.0415717	-7.79381e-14	-0.040884	-9.35257e-14	-0.0466665	-6.23504e-14	-0.0485732	-9.35257e-14	-0.0531992	-3.11752e-14	-0.0557936	0	-0.0464165	-1.24701e-13	-0.049636	-1.09113e-13	-0.0586692	0
0.0279	-0.0440722	-1.24701e-13	-0.0416654	-6.23504e-14	-0.040759	-7.79381e-14	-0.0466353	-6.23504e-14	-0.0486357	-4.67628e-14	-0.0532618	-7.79381e-14	-0.055731	-1.09113e-13	-0.046354	1.55876e-14	-0.049761	-4.67628e-14	-0.0586692	-7.79381e-14
0.028	-0.0441347	-1.55876e-14	-0.0417905	0	-0.0408528	-9.35257e-14	-0.0467291	-1.55876e-14	-0.048792	-3.11752e-14	-0.0531367	-1.55876e-14	-0.055731	-9.35257e-14	-0.0463227	-7.79381e-14	-0.049886	1.55876e-14	-0.0587005	-9.35257e-14
0.0281	-0.0441347	-7.79381e-14	-0.0416967	-4.67628e-14	-0.0409153	-3.11752e-14	-0.0467291	1.55876e-14	-0.0487295	-4.67628e-14	-0.0529492	-9.35257e-14	-0.0556373	-9.35257e-14	-0.0465728	-9.35257e-14	-0.0495734	-6.23504e-14	-0.058763	-1.40288e-13
0.0282	-0.0439785	-9.35257e-14	-0.041728	-1.24701e-13	-0.0409465	-9.35257e-14	-0.046604	-7.79381e-14	-0.0487295	-1.24701e-13	-0.0531055	-1.24701e-13	-0.0556685	-9.35257e-14	-0.0464165	4.67628e-14	-0.0496672	-1.87051e-13	-0.0586692	-4.67628e-14
0.0283	-0.0441035	-1.55876e-13	-0.0416967	-7.79381e-14	-0.040884	-1.09113e-13	-0.0466665	-9.35257e-14	-0.0485732	-7.79381e-14	-0.0532618	1.55876e-14	-0.0557936	-7.79381e-14	-0.0463227	-1.09113e-13	-0.0497922	0	-0.0586692	-9.35257e-14
0.0284	-0.0441035	0	-0.041728	-3.11752e-14	-0.0409465	-9.35257e-14	-0.0466353	-7.79381e-14	-0.048667	-1.55876e-13	-0.0531992	1.55876e-14	-0.0557936	-1.55876e-14	-0.0462915	-1.09113e-13	-0.0496047	-6.23504e-14	-0.0584504	-9.35257e-14
0.0285	-0.0440722	-7.79381e-14	-0.0415092	-3.11752e-14	-0.0409465	-1.09113e-13	-0.0467603	-3.11752e-14	-0.0486982	-4.67628e-14	-0.053293	-1.24701e-13	-0.0557936	-4.67628e-14	-0.0463227	-6.23504e-14	-0.049636	-1.24701e-13	-0.0583566	-1.24701e-13
0.0286	-0.0440722	-6.23504e-14	-0.041728	-1.55876e-13	-0.0409153	-1.24701e-13	-0.0467916	-4.67628e-14	-0.0484794	-6.23504e-14	-0.053418	3.11752e-14	-0.055731	-9.35257e-14	-0.0463852	-9.35257e-14	-0.0496985	-9.35257e-14	-0.0585442	-4.67628e-14
0.0287	-0.0440097	-1.09113e-13	-0.0415717	-4.67628e-14	-0.0407903	-1.09113e-13	-0.0467603	-4.67628e-14	-0.0487608	-1.71464e-13	-0.0535118	1.55876e-14	-0.0556685	-1.24701e-13	-0.0461664	-9.35257e-14	-0.0495734	-7.79381e-14	-0.0584504	4.67628e-14
0.0288	-0.0440097	-1.40288e-13	-0.0419468	-6.23504e-14	-0.040759	-7.79381e-14	-0.0466978	-1.09113e-13	-0.048542	1.55876e-14	-0.0533555	-7.79381e-14	-0.0555748	-1.24701e-13	-0.0459476	-2.02639e-13	-0.0496672	-7.79381e-14	-0.0586067	-6.23504e-14
0.0289	-0.0438534	-1.09113e-13	-0.0418217	-3.11752e-14	-0.0407903	-9.35257e-14	-0.0467916	-1.24701e-13	-0.0487295	-6.23504e-14	-0.053418	-1.40288e-13	-0.055731	-7.79381e-14	-0.0460414	-1.55876e-13	-0.0492921	-1.40288e-13	-0.0586692	0
0.029	-0.044041	-4.67628e-14	-0.0416967	-1.55876e-13	-0.0408215	-4.67628e-14	-0.0465728	-1.09113e-13	-0.0486357	-3.11752e-14	-0.053293	-6.23504e-14	-0.0558873	-1.09113e-13	-0.0461352	1.55876e-14	-0.0494797	-9.35257e-14	-0.0585754	-4.67628e-14
0.0291	-0.0438222	-4.67628e-14	-0.0415404	-1.71464e-13	-0.0407903	-3.11752e-14	-0.0466665	-1.24701e-13	-0.0487295	-9.35257e-14	-0.053418	-9.35257e-14	-0.0555748	3.11752e-14	-0.0461352	0	-0.049636	1.55876e-14	-0.0584817	-1.24701e-13
0.0292	-0.044041	-9.35257e-14	-0.0416967	-1.24701e-13	-0.040759	-4.67628e-14	-0.046604	-4.67628e-14	-0.0489483	-6.23504e-14	-0.0533555	-6.23504e-14	-0.055606	-1.55876e-13	-0.0463227	-1.24701e-13	-0.0494797	0	-0.0582629	-2.02639e-13
0.0293	-0.0440722	1.55876e-14	-0.041853	0	-0.0406652	-1.09113e-13	-0.0465728	-7.79381e-14	-0.0486357	-9.35257e-14	-0.0532618	-7.79381e-14	-0.055731	-1.09113e-13	-0.0464477	1.55876e-14	-0.0493546	-1.24701e-13	-0.0583254	-1.55876e-13
0.0294	-0.0439472	-7.79381e-14	-0.041728	1.55876e-14	-0.040759	-9.35257e-14	-0.0466665	-7.79381e-14	-0.048792	-1.24701e-13	-0.0533868	-1.24701e-13	-0.0557623	1.55876e-14	-0.0461664	0	-0.0494172	-1.40288e-13	-0.0586379	-3.11752e-14
0.0295	-0.0439159	-1.09113e-13	-0.0418842	-9.35257e-14	-0.040634	-6.23504e-14	-0.046604	-4.67628e-14	-0.0488233	0	-0.0533243	-4.67628e-14	-0.0557623	-3.11752e-14	-0.0461352	-2.18227e-13	-0.0495734	1.55876e-14	-0.0584817	6.23504e-14
0.0296	-0.0438222	-7.79381e-14	-0.0417905	-4.67628e-14	-0.0408215	-6.23504e-14	-0.046604	-7.79381e-14	-0.0487295	-7.79381e-14	-0.0535118	-7.79381e-14	-0.0556998	-1.09113e-13	-0.0462915	-4.67628e-14	-0.0495422	0	-0.0584191	-9.35257e-14
0.0297	-0.0440097	-9.35257e-14	-0.0416342	-1.09113e-13	-0.0407277	0	-0.0467603	-4.67628e-14	-0.0488545	-6.23504e-14	-0.0534806	-4.67628e-14	-0.0555748	-1.55876e-13	-0.0463227	0	-0.0494484	-7.79381e-14	-0.0585442	-7.79381e-14
0.0298	-0.0440722	-1.55876e-14	-0.0419468	-7.79381e-14	-0.0407277	-3.11752e-14	-0.0466665	0	-0.0489483	0	-0.0534493	-6.23504e-14	-0.0555435	-4.67628e-14	-0.046229	-7.79381e-14	-0.0495734	-9.35257e-14	-0.0584191	-7.79381e-14
0.0299	-0.0442285	-3.11752e-14	-0.0416967	-9.35257e-14	-0.0408215	-3.11752e-14	-0.0467916	-6.23504e-14	-0.0488545	-4.67628e-14	-0.053418	-9.35257e-14	-0.0556685	-7.79381e-14	-0.0462602	-1.40288e-13	-0.0494484	-1.55876e-14	-0.0584191	-1.24701e-13
0.03	-0.0439472	-9.35257e-14	-0.0418217	-1.24701e-13	-0.0407903	-4.67628e-14	-0.0466665	-3.11752e-14	-0.0488233	-9.35257e-14	-0.0536056	-3.11752e-14	-0.055606	0	-0.0465103	-6.23504e-14	-0.0494172	-9.35257e-14	-0.0583879	-9.35257e-14
0.0301	-0.0439472	-1.87051e-13	-0.0416654	-9.35257e-14	-0.0408215	-1.24701e-13	-0.0465415	-1.40288e-13	-0.0488233	-7.79381e-14	-0.053418	-1.09113e-13	-0.0556998	-9.35257e-14	-0.0462915	1.55876e-14	-0.0493859	-1.09113e-13	-0.0585442	-6.23504e-14
0.0302	-0.0441347	-7.79381e-14	-0.0416342	-1.24701e-13	-0.0408528	-4.67628e-14	-0.0466665	-1.09113e-13	-0.0487295	-1.24701e-13	-0.0534493	-1.71464e-13	-0.0558561	0	-0.0464165	-7.79381e-14	-0.0493234	-7.79381e-14	-0.0583254	-9.35257e-14
0.0303	-0.0441035	-6.23504e-14	-0.041728	-9.35257e-14	-0.040884	-1.24701e-13	-0.0465728	-1.55876e-14	-0.0487295	-4.67628e-14	-0.0535118	-9.35257e-14	-0.055731	0	-0.0464165	-6.23504e-14	-0.0492296	-1.24701e-13	-0.0584817	-6.23504e-14
0.0304	-0.0439472	-9.35257e-14	-0.0415717	-7.79381e-14	-0.0407277	-9.35257e-14	-0.0465103	-7.79381e-14	-0.0486357	-7.79381e-14	-0.0536368	-6.23504e-14	-0.0558561	-6.23504e-14	-0.046479	-9.35257e-14	-0.0491984	-7.79381e-14	-0.0584191	-6.23504e-14
0.0305	-0.0439472	-1.87051e-13	-0.0415092	-1.09113e-13	-0.0408215	-3.11752e-14	-0.046604	-1.09113e-13	-0.0487295	-7.79381e-14	-0.0535743	-4.67628e-14	-0.055731	-9.35257e-14	-0.046604	-4.67628e-14	-0.0492921	-3.11752e-14	-0.0583879	-1.09113e-13
0.0306	-0.044041	-6.23504e-14	-0.0416342	-1.09113e-13	-0.040759	-1.09113e-13	-0.046604	-6.23504e-14	-0.0487608	-6.23504e-14	-0.053418	-9.35257e-14	-0.0556373	-1.24701e-13	-0.046604	-9.35257e-14	-0.0493859	-4.67628e-14	-0.0583566	-9.35257e-14
0.0307	-0.0439785	-1.55876e-14	-0.0416342	0	-0.0407903	-1.09113e-13	-0.0466353	-3.11752e-14	-0.048667	3.11752e-14	-0.0535431	-1.40288e-13	-0.0557623	-7.79381e-14	-0.0466353	-1.09113e-13	-0.0491984	-7.79381e-14	-0.0584191	-9.35257e-14
0.0308	-0.0438847	-6.23504e-14	-0.0416967	-3.11752e-14	-0.0406965	-6.23504e-14	-0.0464477	-7.79381e-14	-0.0486045	-7.79381e-14	-0.053418	-7.79381e-14	-0.0555748	-1.09113e-13	-0.0465728	-9.35257e-14	-0.0491358	-1.24701e-13	-0.0585754	-1.55876e-14
0.0309	-0.044041	-1.24701e-13	-0.0416029	-3.11752e-14	-0.0408215	-1.40288e-13	-0.0465728	-6.23504e-14	-0.0487608	-1.24701e-13	-0.053418	-1.09113e-13	-0.0556685	-1.40288e-13	-0.0466978	-6.23504e-14	-0.0491671	-1.24701e-13	-0.0583566	1.55876e-14
0.031	-0.0439159	-9.35257e-14	-0.0414154	-2.02639e-13	-0.040759	-4.67628e-14	-0.0466665	-4.67628e-14	-0.048667	-9.35257e-14	-0.0534806	-7.79381e-14	-0.055731	-4.67628e-14	-0.0466978	-1.09113e-13	-0.0491358	-6.23504e-14	-0.0584191	-1.40288e-13
0.0311	-0.0439472	-9.35257e-14	-0.0414779	-9.35257e-14	-0.0408528	0	-0.046604	-6.23504e-14	-0.0487608	-9.35257e-14	-0.053418	-4.67628e-14	-0.0557623	-4.67628e-14	-0.046604	-7.79381e-14	-0.0491984	-7.79381e-14	-0.0582941	-1.24701e-13
0.0312	-0.0439785	-6.23504e-14	-0.0412591	-7.79381e-14	-0.040759	-9.35257e-14	-0.046604	-7.79381e-14	-0.0487295	-1.55876e-14	-0.0534806	-1.40288e-13	-0.055731	-9.35257e-14	-0.0465415	-1.24701e-13	-0.0492921	-9.35257e-14	-0.0586379	-7.79381e-14
0.0313	-0.0439472	-4.67628e-14	-0.0413841	-1.40288e-13	-0.0406965	-1.09113e-13	-0.0465103	-3.11752e-14	-0.0487608	-7.79381e-14	-0.0532618	-4.67628e-14	-0.0557936	-1.09113e-13	-0.0466665	-1.09113e-13	-0.0491358	-3.11752e-14	-0.0583254	-1.55876e-14
0.0314	-0.0440097	-1.09113e-13	-0.0413216	1.55876e-14	-0.0406965	-1.55876e-14	-0.0466353	-6.23504e-14	-0.0486982	-4.67628e-14	-0.0534493	-7.79381e-14	-0.055731	-7.79381e-14	-0.0466665	-3.11752e-14	-0.0490421	-4.67628e-14	-0.0584504	-1.24701e-13
0.0315	-0.0438847	-1.55876e-14	-0.0415092	-4.67628e-14	-0.0406652	-7.79381e-14	-0.0465103	-1.24701e-13	-0.0487608	-1.24701e-13	-0.053418	-6.23504e-14	-0.0556998	-7.79381e-14	-0.0466978	-9.35257e-14	-0.0490733	-9.35257e-14	-0.0586379	-4.67628e-14
0.0316	-0.0440722	-7.79381e-14	-0.0415092	-4.67628e-14	-0.0405715	-1.24701e-13	-0.046354	-1.09113e-13	-0.0487608	-7.79381e-14	-0.0533555	-3.11752e-14	-0.0557623	-7.79381e-14	-0.0465103	-7.79381e-14	-0.0491046	-1.24701e-13	-0.0583879	3.11752e-14
0.0317	-0.0441347	-3.11752e-14	-0.0415092	-9.35257e-14	-0.0407903	-6.23504e-14	-0.0465103	-7.79381e-14	-0.0486982	0	-0.0535743	-6.23504e-14	-0.0558561	-4.67628e-14	-0.0465415	-1.24701e-13	-0.0491984	-1.55876e-14	-0.0585129	-2.02639e-13
0.0318	-0.0439785	-4.67628e-14	-0.0414466	-9.35257e-14	-0.0407903	9.35257e-14	-0.0464165	3.11752e-14	-0.0487608	-9.35257e-14	-0.0535118	3.11752e-14	-0.0557936	-4.67628e-14	-0.046604	-6.23504e-14	-0.0490733	-1.09113e-13	-0.0584817	0
0.0319	-0.044041	-1.40288e-13	-0.0413841	-9.35257e-14	-0.0407903	3.11752e-14	-0.0464477	-7.79381e-14	-0.048917	-4.67628e-14	-0.0534806	-7.79381e-14	-0.0557936	-1.09113e-13	-0.0466665	-3.11752e-14	-0.0490421	-6.23504e-14	-0.0583566	-7.79381e-14
0.032	-0.044041	-9.35257e-14	-0.0413529	-7.79381e-14	-0.0407277	-7.79381e-14	-0.0465103	-6.23504e-14	-0.048917	-6.23504e-14	-0.0535743	-1.09113e-13	-0.0558248	-7.79381e-14	-0.0466665	-6.23504e-14	-0.0491358	-7.79381e-14	-0.0583879	-1.09113e-13
0.0321	-0.0439472	-1.09113e-13	-0.0415404	-1.40288e-13	-0.0408215	-1.40288e-13	-0.0466353	-6.23504e-14	-0.0488545	-4.67628e-14	-0.0533555	-7.79381e-14	-0.055731	-6.23504e-14	-0.0466665	-4.67628e-14	-0.0491671	-3.11752e-14	-0.0585129	-4.67628e-14
0.0322	-0.0439472	-1.40288e-13	-0.0413841	-4.67628e-14	-0.0408215	-7.79381e-14	-0.0465103	-4.67628e-14	-0.048667	-7.79381e-14	-0.0533868	-1.40288e-13	-0.0556373	-1.55876e-13	-0.046604	-7.79381e-14	-0.0493234	-1.55876e-14	-0.0586692	-7.79381e-14
0.0323	-0.044041	-6.23504e-14	-0.0416029	-3.11752e-14	-0.0407903	-1.55876e-14	-0.0464165	-6.23504e-14	-0.0487608	-2.18227e-13	-0.0535743	0	-0.0556373	-4.67628e-14	-0.0466665	-9.35257e-14	-0.0492921	-7.79381e-14	-0.0586379	-3.11752e-14
0.0324	-0.0441973	-3.11752e-14	-0.0416029	-3.11752e-14	-0.0408528	-6.23504e-14	-0.0463852	-9.35257e-14	-0.0488233	-6.23504e-14	-0.0534493	1.55876e-14	-0.0556373	-6.23504e-14	-0.0467603	-4.67628e-14	-0.0492609	-6.23504e-14	-0.0587942	-1.09113e-13
0.0325	-0.0439785	-4.67628e-14	-0.0418842	1.55876e-14	-0.0409153	-6.23504e-14	-0.046354	-1.40288e-13	-0.0487295	0	-0.0535118	-1.55876e-13	-0.055731	-3.11752e-14	-0.0467291	0	-0.0492609	-7.79381e-14	-0.0585754	-4.67628e-14
0.0326	-0.0440722	-1.87051e-13	-0.0416967	-6.23504e-14	-0.0408528	-6.23504e-14	-0.0465728	-7.79381e-14	-0.0487608	-1.09113e-13	-0.0535118	-9.35257e-14	-0.0555435	-7.79381e-14	-0.0466978	-1.40288e-13	-0.0492921	-6.23504e-14	-0.0586067	-1.09113e-13
0.0327	-0.0441347	-6.23504e-14	-0.0416654	-9.35257e-14	-0.0408215	-1.40288e-13	-0.0466978	-1.55876e-14	-0.0488233	-7.79381e-14	-0.0533868	-6.23504e-14	-0.055481	-9.35257e-14	-0.0465103	-1.24701e-13	-0.0491984	-1.24701e-13	-0.0586067	-9.35257e-14
0.0328	-0.0441347	-1.40288e-13	-0.0416967	-2.02639e-13	-0.0408528	-6.23504e-14	-0.0465415	1.55876e-14	-0.0488545	-4.67628e-14	-0.053293	-1.09113e-13	-0.055606	-6.23504e-14	-0.0462602	-7.79381e-14	-0.0491358	-7.79381e-14	-0.0585754	-9.35257e-14
0.0329	-0.0441035	-7.79381e-14	-0.0416029	-6.23504e-14	-0.040884	-6.23504e-14	-0.0466978	-1.24701e-13	-0.048917	-1.40288e-13	-0.0533555	-7.79381e-14	-0.055606	-4.67628e-14	-0.0463852	-1.40288e-13	-0.0492921	-9.35257e-14	-0.0585754	-1.24701e-13
0.033	-0.0441035	-1.24701e-13	-0.0415717	-6.23504e-14	-0.0410403	-9.35257e-14	-0.0465415	-4.67628e-14	-0.0488233	-6.23504e-14	-0.0533868	-9.35257e-14	-0.0555122	0	-0.046479	-9.35257e-14	-0.0494484	1.55876e-14	-0.0584504	-1.24701e-13
0.0331	-0.0441347	-3.11752e-14	-0.0416342	-1.09113e-13	-0.0408215	0	-0.0467291	-1.40288e-13	-0.0490108	-3.11752e-14	-0.0533555	-7.79381e-14	-0.0555122	-1.09113e-13	-0.0464165	1.55876e-14	-0.0492921	-1.55876e-14	-0.0586379	-4.67628e-14
0.0332	-0.0441347	-4.67628e-14	-0.041728	-6.23504e-14	-0.040759	-1.09113e-13	-0.0464165	-4.67628e-14	-0.0490421	-4.67628e-14	-0.0532618	-1.09113e-13	-0.055731	-7.79381e-14	-0.0465103	-9.35257e-14	-0.0494172	-9.35257e-14	-0.0585442	-6.23504e-14
0.0333	-0.0441035	-7.79381e-14	-0.0416029	0	-0.0409778	-1.09113e-13	-0.0463852	-1.40288e-13	-0.0488545	-7.79381e-14	-0.0532618	-4.67628e-14	-0.055606	1.55876e-14	-0.0465728	-6.23504e-14	-0.0493859	-1.09113e-13	-0.0586692	-1.24701e-13
0.0334	-0.0440097	-1.09113e-13	-0.0415717	-9.35257e-14	-0.041009	-6.23504e-14	-0.0466353	-6.23504e-14	-0.0488545	-1.40288e-13	-0.053293	-7.79381e-14	-0.0555435	-1.40288e-13	-0.0465728	-9.35257e-14	-0.0492609	-1.55876e-13	-0.0585754	3.11752e-14
0.0335	-0.0441347	-1.24701e-13	-0.0416029	-9.35257e-14	-0.0408215	-6.23504e-14	-0.0466665	1.55876e-14	-0.0489483	-1.09113e-13	-0.0533243	-4.67628e-14	-0.0556998	-1.24701e-13	-0.046354	-7.79381e-14	-0.0494484	-1.09113e-13	-0.0585442	-1.24701e-13
0.0336	-0.044041	-9.35257e-14	-0.0416967	1.55876e-14	-0.0407903	-1.24701e-13	-0.0466665	-3.11752e-14	-0.0488858	0	-0.0532618	-1.55876e-14	-0.055731	-4.67628e-14	-0.0463227	-7.79381e-14	-0.0492921	-1.55876e-14	-0.0586379	-1.24701e-13
0.0337	-0.0439785	-1.24701e-13	-0.041728	1.55876e-14	-0.040759	-4.67628e-14	-0.0466665	-3.11752e-14	-0.0488233	-9.35257e-14	-0.0533868	-1.09113e-13	-0.0556685	-9.35257e-14	-0.0463852	-7.79381e-14	-0.0492296	-1.55876e-13	-0.0584191	-9.35257e-14
0.0338	-0.0439472	-3.11752e-14	-0.0415717	-7.79381e-14	-0.040884	-3.11752e-14	-0.0465415	-7.79381e-14	-0.0488233	-6.23504e-14	-0.0533555	1.55876e-14	-0.0558248	-6.23504e-14	-0.0465103	0	-0.0492609	-1.55876e-13	-0.0585754	-1.09113e-13
0.0339	-0.0437597	-1.09113e-13	-0.0417592	-1.24701e-13	-0.041009	-4.67628e-14	-0.046604	-7.79381e-14	-0.048917	-6.23504e-14	-0.0533243	-9.35257e-14	-0.0557936	-6.23504e-14	-0.0464477	-1.55876e-14	-0.0490733	-9.35257e-14	-0.0584504	-7.79381e-14
0.034	-0.0435721	-1.87051e-13	-0.0417592	-9.35257e-14	-0.0411028	-6.23504e-14	-0.0465103	-1.09113e-13	-0.048917	0	-0.0534493	-9.35257e-14	-0.0555748	-1.09113e-13	-0.0464477	-1.09113e-13	-0.0491358	-9.35257e-14	-0.0585442	-6.23504e-14
0.0341	-0.0437284	-9.35257e-14	-0.0415717	-4.67628e-14	-0.0411028	-3.11752e-14	-0.0465103	-9.35257e-14	-0.0488233	-1.24701e-13	-0.053418	-6.23504e-14	-0.0555435	-1.87051e-13	-0.0464165	-6.23504e-14	-0.0492296	-3.11752e-14	-0.0583879	-4.67628e-14
0.0342	-0.0439159	3.11752e-14	-0.0415404	-1.24701e-13	-0.0410403	-9.35257e-14	-0.0466978	-6.23504e-14	-0.0488545	-9.35257e-14	-0.053418	-1.24701e-13	-0.0556685	-3.11752e-14	-0.0461039	-1.87051e-13	-0.0492609	0	-0.0583566	-7.79381e-14
0.0343	-0.0437909	0	-0.0417905	-7.79381e-14	-0.0409153	-1.24701e-13	-0.046604	0	-0.0489483	0	-0.0535118	-6.23504e-14	-0.0555748	1.55876e-14	-0.0463227	-1.24701e-13	-0.0491984	-1.09113e-13	-0.0582941	-7.79381e-14
0.0344	-0.0439472	-7.79381e-14	-0.0418217	1.55876e-14	-0.0406965	-1.87051e-13	-0.0467291	-7.79381e-14	-0.0488858	-1.55876e-14	-0.0537306	3.11752e-14	-0.055731	-9.35257e-14	-0.0462915	-6.23504e-14	-0.0491358	-1.09113e-13	-0.0585442	-7.79381e-14
0.0345	-0.0440097	-6.23504e-14	-0.0416342	-6.23504e-14	-0.0409778	-1.55876e-13	-0.0467603	0	-0.0489483	-1.24701e-13	-0.0535431	-6.23504e-14	-0.0558248	1.55876e-14	-0.0460727	-6.23504e-14	-0.0490733	-9.35257e-14	-0.0584817	-6.23504e-14
0.0346	-0.0438534	-3.11752e-14	-0.0417905	-9.35257e-14	-0.0408215	6.23504e-14	-0.0469791	0	-0.048917	-3.11752e-14	-0.0535431	-1.55876e-13	-0.0558248	-4.67628e-14	-0.0461664	-7.79381e-14	-0.0492296	-7.79381e-14	-0.0584504	-6.23504e-14
0.0347	-0.0436346	-1.40288e-13	-0.0418217	-4.67628e-14	-0.0409153	-9.35257e-14	-0.0467916	-1.09113e-13	-0.0489483	-7.79381e-14	-0.0533868	-6.23504e-14	-0.055731	-1.24701e-13	-0.0462915	-3.11752e-14	-0.0493546	-1.55876e-14	-0.0585129	-7.79381e-14
0.0348	-0.0439159	-9.35257e-14	-0.0416029	-6.23504e-14	-0.0409153	-3.11752e-14	-0.0466978	-1.87051e-13	-0.0488858	-6.23504e-14	-0.0535118	-1.24701e-13	-0.0557623	-1.09113e-13	-0.0462915	-3.11752e-14	-0.0491984	-4.67628e-14	-0.0583879	-7.79381e-14
0.0349	-0.0438222	1.55876e-14	-0.0416654	-1.40288e-13	-0.0409778	-6.23504e-14	-0.0468228	-1.24701e-13	-0.0486982	-1.40288e-13	-0.0535118	-7.79381e-14	-0.0560436	1.55876e-14	-0.0463852	-4.67628e-14	-0.0491046	-1.40288e-13	-0.0580441	-1.40288e-13
0.035	-0.0439159	0	-0.0416654	-7.79381e-14	-0.0410716	-7.79381e-14	-0.0464165	-1.24701e-13	-0.0488858	-1.24701e-13	-0.0533555	-7.79381e-14	-0.0559811	3.11752e-14	-0.0465103	-6.23504e-14	-0.0492296	-1.55876e-13	-0.0582941	-1.55876e-13
0.0351	-0.0438534	-1.55876e-14	-0.041728	-4.67628e-14	-0.0409153	-4.67628e-14	-0.0464477	-2.18227e-13	-0.048792	-7.79381e-14	-0.0533868	-9.35257e-14	-0.0557936	-1.55876e-13	-0.0463852	-1.24701e-13	-0.0489483	-1.09113e-13	-0.0582003	-9.35257e-14
0.0352	-0.0437909	-1.40288e-13	-0.041728	-9.35257e-14	-0.0409465	-1.09113e-13	-0.0465103	-7.79381e-14	-0.0487608	-4.67628e-14	-0.0537306	-7.79381e-14	-0.0556998	-2.18227e-13	-0.046354	-6.23504e-14	-0.0490733	-1.24701e-13	-0.0581066	-7.79381e-14
0.0353	-0.0437284	-1.09113e-13	-0.041728	-9.35257e-14	-0.0408215	-1.24701e-13	-0.046604	-3.11752e-14	-0.0489796	-4.67628e-14	-0.0533555	3.11752e-14	-0.0558873	-9.35257e-14	-0.046604	-4.67628e-14	-0.0491984	-7.79381e-14	-0.0582003	0
0.0354	-0.0439159	-6.23504e-14	-0.0417592	-4.67628e-14	-0.0407903	-1.24701e-13	-0.0466353	-3.11752e-14	-0.0490421	0	-0.0535431	-1.87051e-13	-0.0557936	-1.55876e-14	-0.0464165	-7.79381e-14	-0.0487295	0	-0.0584191	-1.55876e-14
0.0355	-0.0437909	-4.67628e-14	-0.0416967	0	-0.0407903	-6.23504e-14	-0.0465415	-9.35257e-14	-0.0488233	-1.09113e-13	-0.0535118	-9.35257e-14	-0.0557936	-6.23504e-14	-0.0465728	-1.40288e-13	-0.0490421	-2.33814e-13	-0.0583254	0
0.0356	-0.0437284	-9.35257e-14	-0.0418217	-7.79381e-14	-0.0409778	0	-0.0466353	-4.67628e-14	-0.0490421	-1.09113e-13	-0.0535431	-3.11752e-14	-0.0558248	-4.67628e-14	-0.0464165	-7.79381e-14	-0.0491046	4.67628e-14	-0.0581691	-1.24701e-13
0.0357	-0.0438534	-1.09113e-13	-0.0416342	-4.67628e-14	-0.0407277	-3.11752e-14	-0.0465728	-1.09113e-13	-0.048917	-6.23504e-14	-0.0534493	-3.11752e-14	-0.0559498	-7.79381e-14	-0.0464165	-1.09113e-13	-0.0492296	-4.67628e-14	-0.0582003	-9.35257e-14
0.0358	-0.0438534	1.55876e-14	-0.0418842	-9.35257e-14	-0.040759	-9.35257e-14	-0.0464477	-1.09113e-13	-0.0488233	-1.09113e-13	-0.0535118	-3.11752e-14	-0.0558248	-6.23504e-14	-0.046479	-9.35257e-14	-0.0492609	0	-0.0582629	-7.79381e-14
0.0359	-0.0438847	-1.55876e-14	-0.0415717	-7.79381e-14	-0.0409465	-1.55876e-14	-0.046479	-1.24701e-13	-0.0489483	-4.67628e-14	-0.0535431	-9.35257e-14	-0.0558248	-1.40288e-13	-0.0467603	-9.35257e-14	-0.0491671	-1.09113e-13	-0.0581691	-1.55876e-14
0.036	-0.0439472	0	-0.041728	-1.09113e-13	-0.0409465	1.55876e-14	-0.046604	-4.67628e-14	-0.048792	-1.55876e-14	-0.0535118	-4.67628e-14	-0.0558561	-6.23504e-14	-0.0464477	-4.67628e-14	-0.0491671	-9.35257e-14	-0.0583879	-1.55876e-14
0.0361	-0.0437909	-1.09113e-13	-0.041728	3.11752e-14	-0.040759	-9.35257e-14	-0.0466978	-3.11752e-14	-0.0487295	-1.40288e-13	-0.0536368	-1.24701e-13	-0.0558873	-6.23504e-14	-0.0466353	-1.55876e-13	-0.0491358	-7.79381e-14	-0.0583879	-4.67628e-14
0.0362	-0.0438847	-7.79381e-14	-0.041853	-4.67628e-14	-0.0410716	-6.23504e-14	-0.0465415	-4.67628e-14	-0.0487608	-7.79381e-14	-0.0536681	0	-0.0558248	-9.35257e-14	-0.046604	-6.23504e-14	-0.0492921	-1.09113e-13	-0.0582941	-9.35257e-14
0.0363	-0.044041	-3.11752e-14	-0.0419468	-4.67628e-14	-0.0411028	1.55876e-14	-0.0467603	-1.24701e-13	-0.0487608	3.11752e-14	-0.0537306	0	-0.0559498	-9.35257e-14	-0.0465728	-9.35257e-14	-0.0490108	-3.11752e-14	-0.0585754	-1.09113e-13
0.0364	-0.0438847	-7.79381e-14	-0.0419468	-1.24701e-13	-0.040759	-9.35257e-14	-0.0468541	0	-0.048917	-9.35257e-14	-0.0534493	-1.40288e-13	-0.0558248	-4.67628e-14	-0.0464477	-6.23504e-14	-0.0490108	-1.55876e-13	-0.0584817	0
0.0365	-0.044041	-6.23504e-14	-0.0420093	-7.79381e-14	-0.0411028	-1.09113e-13	-0.0465415	-6.23504e-14	-0.048792	0	-0.0535743	-1.24701e-13	-0.0558248	-1.09113e-13	-0.0465103	-1.09113e-13	-0.0492296	-9.35257e-14	-0.0583254	-6.23504e-14
0.0366	-0.0440097	-4.67628e-14	-0.0418842	-7.79381e-14	-0.0409465	0	-0.0466665	-1.24701e-13	-0.0488545	-6.23504e-14	-0.0535743	-6.23504e-14	-0.0558248	-6.23504e-14	-0.046604	-4.67628e-14	-0.0490108	-6.23504e-14	-0.0584191	-1.71464e-13
0.0367	-0.044041	-7.79381e-14	-0.0417905	-1.55876e-13	-0.0409465	-9.35257e-14	-0.0466665	-4.67628e-14	-0.0487608	-9.35257e-14	-0.0537306	-3.11752e-14	-0.0558873	0	-0.0465728	1.55876e-14	-0.0489796	-1.55876e-13	-0.0585754	-6.23504e-14
0.0368	-0.0439159	-7.79381e-14	-0.0416342	-9.35257e-14	-0.0411028	-7.79381e-14	-0.046604	-6.23504e-14	-0.0487608	-1.09113e-13	-0.0536681	1.55876e-14	-0.0558873	-9.35257e-14	-0.0465103	-1.09113e-13	-0.0491046	-6.23504e-14	-0.0583879	-1.55876e-14
0.0369	-0.0440097	-1.40288e-13	-0.0416967	-1.09113e-13	-0.041009	-3.11752e-14	-0.0465415	-4.67628e-14	-0.0486357	-7.79381e-14	-0.0537931	-6.23504e-14	-0.055731	-6.23504e-14	-0.0464165	-9.35257e-14	-0.0490108	-1.24701e-13	-0.0584504	-9.35257e-14
0.037	-0.0439472	-3.11752e-14	-0.041728	-9.35257e-14	-0.0411341	-4.67628e-14	-0.046604	-1.09113e-13	-0.0487608	-9.35257e-14	-0.0536056	-1.24701e-13	-0.0557936	-1.24701e-13	-0.0466665	-6.23504e-14	-0.0491046	0	-0.0584817	-4.67628e-14
0.0371	-0.044041	-1.40288e-13	-0.0416654	-4.67628e-14	-0.041009	-9.35257e-14	-0.046479	-9.35257e-14	-0.0488545	-7.79381e-14	-0.0536993	-1.40288e-13	-0.055731	-1.09113e-13	-0.0465728	-3.11752e-14	-0.0492921	0	-0.0584504	-9.35257e-14
0.0372	-0.0439472	-9.35257e-14	-0.0416342	-7.79381e-14	-0.0409465	-9.35257e-14	-0.0466353	-3.11752e-14	-0.0488858	-3.11752e-14	-0.0535743	-9.35257e-14	-0.0558248	-9.35257e-14	-0.0466665	-6.23504e-14	-0.0490421	-1.09113e-13	-0.0584817	-4.67628e-14
0.0373	-0.0440097	-3.11752e-14	-0.0415404	-1.24701e-13	-0.0410403	-7.79381e-14	-0.0465103	-3.11752e-14	-0.0488545	1.55876e-14	-0.0536368	-2.18227e-13	-0.0556998	-1.09113e-13	-0.0466665	1.55876e-14	-0.0491984	-1.09113e-13	-0.0585442	-4.67628e-14
0.0374	-0.0440097	0	-0.0416967	0	-0.0409153	-4.67628e-14	-0.0466353	-9.35257e-14	-0.048792	-9.35257e-14	-0.0536368	-3.11752e-14	-0.0555435	-1.09113e-13	-0.0469166	-9.35257e-14	-0.0490421	-9.35257e-14	-0.0582629	-6.23504e-14
0.0375	-0.0440722	-3.11752e-14	-0.0415717	0	-0.0409465	-1.40288e-13	-0.0465728	-4.67628e-14	-0.0488858	-1.87051e-13	-0.0536681	-1.09113e-13	-0.0557936	-1.24701e-13	-0.0468228	-3.11752e-14	-0.0490108	-1.09113e-13	-0.0582941	-1.24701e-13
0.0376	-0.044166	-9.35257e-14	-0.0414466	-1.24701e-13	-0.0409778	3.11752e-14	-0.046604	-3.11752e-14	-0.048667	-6.23504e-14	-0.0534493	-1.55876e-13	-0.0556685	9.35257e-14	-0.0470104	-1.09113e-13	-0.0491046	-6.23504e-14	-0.0584191	-1.40288e-13
0.0377	-0.0440722	-4.67628e-14	-0.0416342	-1.09113e-13	-0.0410403	-6.23504e-14	-0.0467916	-1.09113e-13	-0.0488233	-7.79381e-14	-0.0536681	-6.23504e-14	-0.0558873	-6.23504e-14	-0.0471041	-7.79381e-14	-0.0490108	-9.35257e-14	-0.0583879	4.67628e-14
0.0378	-0.0439472	-7.79381e-14	-0.0415717	-3.11752e-14	-0.0409465	-6.23504e-14	-0.0466978	0	-0.0488545	0	-0.0536056	-3.11752e-14	-0.0558248	1.55876e-14	-0.0468853	-6.23504e-14	-0.048917	-1.24701e-13	-0.0585442	-7.79381e-14
0.0379	-0.0440097	-1.55876e-13	-0.0416654	-1.09113e-13	-0.041009	-7.79381e-14	-0.0465415	-6.23504e-14	-0.0487608	-3.11752e-14	-0.0535743	-7.79381e-14	-0.0558873	-7.79381e-14	-0.0468853	-1.09113e-13	-0.0489483	-1.55876e-13	-0.0585442	-7.79381e-14
0.038	-0.0439785	0	-0.0416654	-4.67628e-14	-0.0409465	-4.67628e-14	-0.046604	-2.18227e-13	-0.048792	-7.79381e-14	-0.0533868	-9.35257e-14	-0.0560124	-4.67628e-14	-0.0470104	-6.23504e-14	-0.0490108	-7.79381e-14	-0.0584504	-4.67628e-14
0.0381	-0.0438847	-7.79381e-14	-0.0416967	-9.35257e-14	-0.040884	-7.79381e-14	-0.0466353	-9.35257e-14	-0.048667	-1.71464e-13	-0.053418	-7.79381e-14	-0.0561061	-9.35257e-14	-0.0468853	-1.09113e-13	-0.0490108	-3.11752e-14	-0.0583566	-3.11752e-14
0.0382	-0.0440097	-6.23504e-14	-0.0416029	-9.35257e-14	-0.0409153	-1.40288e-13	-0.046604	-4.67628e-14	-0.0488233	0	-0.053293	-9.35257e-14	-0.0559186	-9.35257e-14	-0.0469166	-1.40288e-13	-0.0490421	-6.23504e-14	-0.0583254	-1.24701e-13
0.0383	-0.0441035	-3.11752e-14	-0.0416342	-1.40288e-13	-0.040759	-1.40288e-13	-0.0467916	0	-0.0488858	-1.55876e-14	-0.0531055	-1.09113e-13	-0.0559186	-7.79381e-14	-0.0468541	-9.35257e-14	-0.048917	-1.09113e-13	-0.0582629	-7.79381e-14
0.0384	-0.0441973	-6.23504e-14	-0.0416654	-7.79381e-14	-0.0409465	-9.35257e-14	-0.0465415	-9.35257e-14	-0.0488858	-6.23504e-14	-0.0533555	-9.35257e-14	-0.0558561	-6.23504e-14	-0.0467291	-1.09113e-13	-0.0491046	-1.71464e-13	-0.0582316	-4.67628e-14
0.0385	-0.0440722	-3.11752e-14	-0.0414466	-6.23504e-14	-0.040884	4.67628e-14	-0.0467291	-1.40288e-13	-0.048667	-7.79381e-14	-0.0534806	-6.23504e-14	-0.0557936	-6.23504e-14	-0.0467603	-9.35257e-14	-0.0491671	-1.55876e-14	-0.0583566	-9.35257e-14
0.0386	-0.044041	-1.55876e-13	-0.0414466	-1.40288e-13	-0.0409778	-1.24701e-13	-0.0466353	-3.11752e-14	-0.0486357	-1.71464e-13	-0.0531992	0	-0.0557623	-6.23504e-14	-0.0467291	-9.35257e-14	-0.0491984	-6.23504e-14	-0.0583879	-1.55876e-14
0.0387	-0.0441347	-6.23504e-14	-0.0416342	1.55876e-14	-0.0408528	-9.35257e-14	-0.0466665	-1.09113e-13	-0.0487608	-9.35257e-14	-0.0533555	-9.35257e-14	-0.0560436	-1.24701e-13	-0.0467916	-1.09113e-13	-0.0491984	-1.09113e-13	-0.0583879	0
0.0388	-0.0439785	-7.79381e-14	-0.0416342	-4.67628e-14	-0.0408528	-1.09113e-13	-0.0467916	-1.55876e-13	-0.0489483	0	-0.0535743	-3.11752e-14	-0.0558248	1.55876e-14	-0.0468541	-7.79381e-14	-0.0492296	-4.67628e-14	-0.0582316	-7.79381e-14
0.0389	-0.0439159	-7.79381e-14	-0.0416029	-7.79381e-14	-0.0410403	0	-0.0468541	3.11752e-14	-0.0488545	-4.67628e-14	-0.0535431	9.35257e-14	-0.0558873	-1.24701e-13	-0.0469791	-3.11752e-14	-0.0493234	-7.79381e-14	-0.0581378	-1.24701e-13
0.039	-0.0441035	-9.35257e-14	-0.0415717	-7.79381e-14	-0.040759	-6.23504e-14	-0.0466353	-3.11752e-14	-0.0488233	-1.24701e-13	-0.0533868	-1.09113e-13	-0.0561061	-9.35257e-14	-0.0470729	0	-0.0492609	-9.35257e-14	-0.0584817	-7.79381e-14
0.0391	-0.0442285	-4.67628e-14	-0.0414154	-4.67628e-14	-0.0407277	-1.71464e-13	-0.0467603	-2.18227e-13	-0.0487295	-7.79381e-14	-0.0535431	-1.24701e-13	-0.0558561	3.11752e-14	-0.0470416	-1.24701e-13	-0.0491046	-1.55876e-13	-0.0583254	6.23504e-14
0.0392	-0.044166	-6.23504e-14	-0.0415404	-1.09113e-13	-0.040884	-3.11752e-14	-0.046479	-7.79381e-14	-0.048667	-9.35257e-14	-0.053418	-4.67628e-14	-0.0559186	-1.09113e-13	-0.0468853	-1.40288e-13	-0.0491358	-1.40288e-13	-0.0583566	-1.24701e-13
0.0393	-0.0439472	-1.09113e-13	-0.0416029	-1.55876e-14	-0.040759	0	-0.0465728	-1.40288e-13	-0.0485732	-1.40288e-13	-0.053418	-1.09113e-13	-0.0559186	-9.35257e-14	-0.0468853	-1.09113e-13	-0.0490733	-6.23504e-14	-0.0583566	-6.23504e-14
0.0394	-0.0438847	-1.24701e-13	-0.0416342	-7.79381e-14	-0.0409153	-7.79381e-14	-0.0466353	-6.23504e-14	-0.048667	-6.23504e-14	-0.0535118	-9.35257e-14	-0.0560436	-4.67628e-14	-0.0470729	-1.24701e-13	-0.0493234	-4.67628e-14	-0.0585129	-1.09113e-13
0.0395	-0.0440722	-1.40288e-13	-0.0415092	-7.79381e-14	-0.0408215	-6.23504e-14	-0.0467916	3.11752e-14	-0.0486357	1.55876e-14	-0.0535743	0	-0.0559186	-7.79381e-14	-0.0471354	0	-0.0492296	-1.55876e-14	-0.0584504	-9.35257e-14
0.0396	-0.0438534	-4.67628e-14	-0.0415404	-9.35257e-14	-0.0408528	-1.24701e-13	-0.0465103	-1.09113e-13	-0.0486982	-7.79381e-14	-0.0535431	-4.67628e-14	-0.0560124	-1.09113e-13	-0.0470416	-6.23504e-14	-0.0492609	-9.35257e-14	-0.0585129	-6.23504e-14
0.0397	-0.0440722	-3.11752e-14	-0.0416029	-3.11752e-14	-0.0409465	-4.67628e-14	-0.0468228	-1.40288e-13	-0.0487295	-6.23504e-14	-0.0533868	-1.55876e-13	-0.0558248	-1.40288e-13	-0.0467916	-1.24701e-13	-0.0492921	-1.24701e-13	-0.0585129	-1.09113e-13
0.0398	-0.0440097	-7.79381e-14	-0.0414779	-9.35257e-14	-0.0411028	0	-0.0468228	7.79381e-14	-0.0487608	-6.23504e-14	-0.0534493	-7.79381e-14	-0.0559186	-7.79381e-14	-0.0470416	-1.55876e-13	-0.0493234	-4.67628e-14	-0.0584191	-1.09113e-13
0.0399	-0.0437909	-7.79381e-14	-0.0415404	-1.55876e-13	-0.040884	1.55876e-14	-0.0467291	-1.09113e-13	-0.048792	-4.67628e-14	-0.0536056	-4.67628e-14	-0.0558561	-6.23504e-14	-0.0469479	-3.11752e-14	-0.0493546	-6.23504e-14	-0.0582629	-1.09113e-13
0.04	-0.0438847	-1.24701e-13	-0.0414466	-3.11752e-14	-0.040884	-1.24701e-13	-0.0468541	-7.79381e-14	-0.0486357	-1.09113e-13	-0.0535118	-4.67628e-14	-0.0559498	-6.23504e-14	-0.0470416	-6.23504e-14	-0.0493234	-1.24701e-13	-0.0582941	-7.79381e-14
0.0401	-0.0438847	-7.79381e-14	-0.041728	-4.67628e-14	-0.041009	-7.79381e-14	-0.0466665	-4.67628e-14	-0.048542	-1.24701e-13	-0.0534806	-9.35257e-14	-0.0559498	1.55876e-14	-0.0470729	-1.09113e-13	-0.0492296	-1.09113e-13	-0.0582003	-7.79381e-14
0.0402	-0.0438222	-3.11752e-14	-0.0416342	-4.67628e-14	-0.0410716	0	-0.0467291	-1.40288e-13	-0.0488233	-9.35257e-14	-0.0534493	-1.24701e-13	-0.0558873	-3.11752e-14	-0.0469166	-9.35257e-14	-0.0492296	-1.40288e-13	-0.0584504	-4.67628e-14
0.0403	-0.0439159	-1.24701e-13	-0.0416029	-4.67628e-14	-0.0409153	-4.67628e-14	-0.0467916	-9.35257e-14	-0.0486045	3.11752e-14	-0.0535743	-9.35257e-14	-0.0559498	-9.35257e-14	-0.0470104	-9.35257e-14	-0.0491984	-6.23504e-14	-0.0582629	-7.79381e-14
0.0404	-0.0440722	-4.67628e-14	-0.0415092	-9.35257e-14	-0.040884	-1.09113e-13	-0.0467603	-6.23504e-14	-0.048792	-3.11752e-14	-0.0535431	0	-0.0559811	-1.09113e-13	-0.0469479	-7.79381e-14	-0.0491984	-4.67628e-14	-0.0583566	-1.24701e-13
0.0405	-0.0440097	1.55876e-14	-0.0415404	0	-0.0407903	-1.40288e-13	-0.0467916	0	-0.048792	-7.79381e-14	-0.0536368	-7.79381e-14	-0.0558561	-3.11752e-14	-0.0468541	-1.40288e-13	-0.0491358	-9.35257e-14	-0.0583566	-4.67628e-14
0.0406	-0.0440097	-1.09113e-13	-0.0416029	-6.23504e-14	-0.0405402	-1.09113e-13	-0.0467291	-7.79381e-14	-0.0486982	-6.23504e-14	-0.0535743	-1.40288e-13	-0.0559498	-1.09113e-13	-0.0468541	-6.23504e-14	-0.0490733	-7.79381e-14	-0.0582941	-1.09113e-13
0.0407	-0.0437909	-7.79381e-14	-0.0414154	-1.40288e-13	-0.0406652	-1.24701e-13	-0.0466978	-1.40288e-13	-0.048667	-3.11752e-14	-0.053418	-7.79381e-14	-0.0560749	0	-0.0469166	-1.55876e-14	-0.0491046	-7.79381e-14	-0.0582941	-9.35257e-14
0.0408	-0.0440722	-3.11752e-14	-0.0416029	-1.09113e-13	-0.0406652	1.55876e-14	-0.0466353	-6.23504e-14	-0.0490108	-4.67628e-14	-0.0535431	-1.40288e-13	-0.0561061	-7.79381e-14	-0.0469479	-7.79381e-14	-0.0490733	-6.23504e-14	-0.0580441	-9.35257e-14
0.0409	-0.0441035	4.67628e-14	-0.0416654	-4.67628e-14	-0.0408215	-6.23504e-14	-0.0466353	-9.35257e-14	-0.0487608	0	-0.0535431	-7.79381e-14	-0.0560124	-7.79381e-14	-0.0469166	-6.23504e-14	-0.0491046	-7.79381e-14	-0.0582941	-1.24701e-13
0.041	-0.0442598	-1.24701e-13	-0.0414466	-9.35257e-14	-0.0408528	-3.11752e-14	-0.046604	-7.79381e-14	-0.0486982	-1.55876e-13	-0.0535743	-4.67628e-14	-0.0560124	-1.09113e-13	-0.0469479	-3.11752e-14	-0.0489796	-7.79381e-14	-0.0582629	3.11752e-14
0.0411	-0.0440097	-1.24701e-13	-0.0415092	-9.35257e-14	-0.0408528	-9.35257e-14	-0.0466665	-3.11752e-14	-0.0486357	-1.09113e-13	-0.0536681	-3.11752e-14	-0.0559186	-9.35257e-14	-0.0469479	-1.09113e-13	-0.0491046	-1.09113e-13	-0.0581691	-1.55876e-14
0.0412	-0.044041	-9.35257e-14	-0.0415717	-1.09113e-13	-0.040759	-6.23504e-14	-0.046604	-3.11752e-14	-0.0486357	-1.09113e-13	-0.0537306	-1.55876e-14	-0.0558561	-6.23504e-14	-0.0467916	-1.09113e-13	-0.0491358	1.55876e-14	-0.0580753	-6.23504e-14
0.0413	-0.044291	-6.23504e-14	-0.0415717	-6.23504e-14	-0.0408215	-6.23504e-14	-0.0465728	-6.23504e-14	-0.0486045	-6.23504e-14	-0.0536681	-6.23504e-14	-0.0558873	-9.35257e-14	-0.0467291	-1.09113e-13	-0.048917	-9.35257e-14	-0.0581691	-1.24701e-13
0.0414	-0.0439785	0	-0.0415717	-7.79381e-14	-0.0408528	-3.11752e-14	-0.0467291	-1.40288e-13	-0.0488858	-7.79381e-14	-0.0537931	-1.09113e-13	-0.0557936	-9.35257e-14	-0.0467916	-1.40288e-13	-0.048917	-1.87051e-13	-0.0583566	3.11752e-14
0.0415	-0.0437597	-1.40288e-13	-0.041728	-7.79381e-14	-0.0407903	-6.23504e-14	-0.0467291	-4.67628e-14	-0.0486045	-4.67628e-14	-0.0536993	-6.23504e-14	-0.0558248	-4.67628e-14	-0.0467603	-4.67628e-14	-0.0490108	-7.79381e-14	-0.0582316	-4.67628e-14
0.0416	-0.0439159	-1.40288e-13	-0.0416654	-1.24701e-13	-0.040759	-9.35257e-14	-0.0464165	-9.35257e-14	-0.0488233	-1.71464e-13	-0.0536368	-9.35257e-14	-0.0557623	-4.67628e-14	-0.0467603	-6.23504e-14	-0.0492609	0	-0.0584191	-4.67628e-14
0.0417	-0.0440722	4.67628e-14	-0.0416967	-7.79381e-14	-0.0407903	-1.09113e-13	-0.0467603	-1.55876e-13	-0.0485732	-3.11752e-14	-0.0537306	-4.67628e-14	-0.0558248	-7.79381e-14	-0.0467603	-4.67628e-14	-0.0492921	4.67628e-14	-0.0583566	-3.11752e-14
0.0418	-0.0438534	-3.11752e-14	-0.0415717	-7.79381e-14	-0.0406965	-6.23504e-14	-0.0467603	-6.23504e-14	-0.0486045	-1.24701e-13	-0.0536056	-7.79381e-14	-0.0559498	-3.11752e-14	-0.0467603	-7.79381e-14	-0.0492921	-9.35257e-14	-0.0582629	-4.67628e-14
0.0419	-0.0440722	-1.24701e-13	-0.0416029	-2.33814e-13	-0.0408215	-2.02639e-13	-0.0466978	-6.23504e-14	-0.0486045	-6.23504e-14	-0.0535743	-1.24701e-13	-0.0557623	-4.67628e-14	-0.0466978	-9.35257e-14	-0.0493546	-3.11752e-14	-0.0583254	-1.09113e-13
0.042	-0.0440722	-4.67628e-14	-0.0416029	-7.79381e-14	-0.040884	-4.67628e-14	-0.0467916	-7.79381e-14	-0.0486045	-9.35257e-14	-0.0536993	-6.23504e-14	-0.0556373	-1.24701e-13	-0.0466978	-4.67628e-14	-0.0491984	-7.79381e-14	-0.0582629	-6.23504e-14
0.0421	-0.0440097	-7.79381e-14	-0.0416967	-3.11752e-14	-0.0408528	7.79381e-14	-0.0467291	-9.35257e-14	-0.0487608	-7.79381e-14	-0.0536681	-4.67628e-14	-0.055731	-3.11752e-14	-0.046604	-4.67628e-14	-0.0492609	-1.09113e-13	-0.0582316	-1.24701e-13
0.0422	-0.044041	-1.09113e-13	-0.041728	-4.67628e-14	-0.0407903	-1.09113e-13	-0.0465415	-1.09113e-13	-0.048792	-3.11752e-14	-0.0536993	-1.24701e-13	-0.0556998	-3.11752e-14	-0.046354	-9.35257e-14	-0.0493546	-1.24701e-13	-0.0582629	-6.23504e-14
0.0423	-0.0441973	-6.23504e-14	-0.0416654	-4.67628e-14	-0.040759	-7.79381e-14	-0.0465415	-1.24701e-13	-0.0486357	-7.79381e-14	-0.0536056	-3.11752e-14	-0.055606	-1.40288e-13	-0.046354	-1.40288e-13	-0.0493234	3.11752e-14	-0.0583879	-6.23504e-14
0.0424	-0.0442598	3.11752e-14	-0.0415717	-7.79381e-14	-0.0408528	-1.09113e-13	-0.0465103	-6.23504e-14	-0.0486045	-1.24701e-13	-0.053418	-7.79381e-14	-0.0557623	-7.79381e-14	-0.0462915	-9.35257e-14	-0.0493546	-7.79381e-14	-0.0583566	-6.23504e-14
0.0425	-0.0442598	-6.23504e-14	-0.041728	-1.24701e-13	-0.0409153	-6.23504e-14	-0.0465728	-1.09113e-13	-0.0488233	-9.35257e-14	-0.0535118	-7.79381e-14	-0.0558873	1.55876e-14	-0.0463227	-9.35257e-14	-0.0494172	-4.67628e-14	-0.0583879	-3.11752e-14
0.0426	-0.0443535	-9.35257e-14	-0.041728	-6.23504e-14	-0.0409465	-7.79381e-14	-0.0465728	-4.67628e-14	-0.0487295	1.55876e-14	-0.0536681	-1.09113e-13	-0.0556998	3.11752e-14	-0.0462915	-7.79381e-14	-0.0492609	-9.35257e-14	-0.0583254	-3.11752e-14
0.0427	-0.0443535	-6.23504e-14	-0.0417592	-1.09113e-13	-0.0407903	-7.79381e-14	-0.046479	-9.35257e-14	-0.0486982	-9.35257e-14	-0.0536056	0	-0.0560124	-9.35257e-14	-0.0463227	-7.79381e-14	-0.0493234	-1.40288e-13	-0.0582003	-9.35257e-14
0.0428	-0.0442285	-1.09113e-13	-0.0420405	3.11752e-14	-0.0409465	-4.67628e-14	-0.0463227	-1.55876e-13	-0.048667	-1.09113e-13	-0.0536368	-4.67628e-14	-0.0560436	-6.23504e-14	-0.046229	-3.11752e-14	-0.0494797	-6.23504e-14	-0.0582629	-9.35257e-14
0.0429	-0.0441347	-2.18227e-13	-0.041728	0	-0.0408215	-4.67628e-14	-0.0465103	-1.55876e-14	-0.0488545	-1.09113e-13	-0.0535431	-4.67628e-14	-0.0559811	-7.79381e-14	-0.0462915	-1.09113e-13	-0.0494484	0	-0.0583879	-3.11752e-14
0.043	-0.0441347	-9.35257e-14	-0.0417905	-1.87051e-13	-0.041009	-7.79381e-14	-0.046479	-7.79381e-14	-0.0488233	1.55876e-14	-0.0537306	-1.09113e-13	-0.0557936	-4.67628e-14	-0.0462602	0	-0.0495109	-3.11752e-14	-0.0583879	-7.79381e-14
0.0431	-0.0440722	-1.09113e-13	-0.0417905	-6.23504e-14	-0.0407903	-7.79381e-14	-0.0464477	-3.11752e-14	-0.0488545	-6.23504e-14	-0.0536368	-3.11752e-14	-0.0558873	-1.55876e-13	-0.0463852	-7.79381e-14	-0.0495734	-1.55876e-14	-0.0584191	-6.23504e-14
0.0432	-0.0440722	-6.23504e-14	-0.0416967	-6.23504e-14	-0.0409465	-1.09113e-13	-0.0466665	-3.11752e-14	-0.0488858	-9.35257e-14	-0.0536368	-7.79381e-14	-0.055731	-7.79381e-14	-0.0463852	-7.79381e-14	-0.0495109	-6.23504e-14	-0.0586067	-9.35257e-14
0.0433	-0.044166	-4.67628e-14	-0.0416654	-1.24701e-13	-0.0408215	-7.79381e-14	-0.0466665	-3.11752e-14	-0.048667	-7.79381e-14	-0.0536368	-6.23504e-14	-0.0556685	-1.09113e-13	-0.0461977	-6.23504e-14	-0.0494172	-9.35257e-14	-0.0583566	-7.79381e-14
0.0434	-0.044166	-7.79381e-14	-0.0416967	-1.09113e-13	-0.0408528	-4.67628e-14	-0.0465415	-7.79381e-14	-0.0487608	-1.24701e-13	-0.0536056	-1.09113e-13	-0.0558248	-1.09113e-13	-0.0463227	-1.09113e-13	-0.0494172	-4.67628e-14	-0.0582941	-1.24701e-13
0.0435	-0.0442285	-1.09113e-13	-0.041728	-7.79381e-14	-0.0408215	-6.23504e-14	-0.0467603	-1.24701e-13	-0.048917	-3.11752e-14	-0.0536056	-7.79381e-14	-0.0558561	1.55876e-14	-0.0463227	-4.67628e-14	-0.0493859	-1.40288e-13	-0.0584817	-6.23504e-14
0.0436	-0.0441973	-7.79381e-14	-0.041728	1.55876e-14	-0.0407277	-7.79381e-14	-0.046604	0	-0.0490421	0	-0.0536681	-4.67628e-14	-0.0558873	-3.11752e-14	-0.0463227	-4.67628e-14	-0.0493859	-1.24701e-13	-0.0585129	-6.23504e-14
0.0437	-0.0441035	-1.24701e-13	-0.0416342	-1.24701e-13	-0.0407903	-9.35257e-14	-0.0466665	-1.24701e-13	-0.0487608	-9.35257e-14	-0.0536056	-9.35257e-14	-0.0558873	-1.55876e-14	-0.046354	-9.35257e-14	-0.0494172	3.11752e-14	-0.0584191	-1.09113e-13
0.0438	-0.044291	-1.24701e-13	-0.041728	-1.24701e-13	-0.0406965	-6.23504e-14	-0.0467291	-6.23504e-14	-0.048792	-1.55876e-13	-0.0534806	-1.24701e-13	-0.0558561	-3.11752e-14	-0.0463852	-9.35257e-14	-0.0495734	-4.67628e-14	-0.0583879	-7.79381e-14
0.0439	-0.0441973	3.11752e-14	-0.0417905	-7.79381e-14	-0.040884	-4.67628e-14	-0.0466353	0	-0.0488233	-7.79381e-14	-0.0535431	-3.11752e-14	-0.0559498	-1.40288e-13	-0.046354	-6.23504e-14	-0.0495109	-3.11752e-14	-0.0583879	-7.79381e-14
0.044	-0.0443223	-1.09113e-13	-0.0416654	-9.35257e-14	-0.0408528	0	-0.0466665	-9.35257e-14	-0.0489483	-1.55876e-14	-0.0536056	-9.35257e-14	-0.0558873	-6.23504e-14	-0.046354	-6.23504e-14	-0.0496047	-4.67628e-14	-0.0583254	-6.23504e-14
0.0441	-0.0443223	-1.55876e-14	-0.041728	-9.35257e-14	-0.0408215	-7.79381e-14	-0.0466978	-4.67628e-14	-0.0488233	-6.23504e-14	-0.0534806	-3.11752e-14	-0.0558873	-1.40288e-13	-0.046354	-1.40288e-13	-0.049636	-7.79381e-14	-0.0584817	-1.40288e-13
0.0442	-0.0441347	-1.40288e-13	-0.041728	1.55876e-14	-0.040759	-1.71464e-13	-0.0466353	-1.09113e-13	-0.048792	-1.55876e-13	-0.0535743	-1.40288e-13	-0.0559498	-9.35257e-14	-0.0464477	-9.35257e-14	-0.0495422	-9.35257e-14	-0.0583566	-3.11752e-14
0.0443	-0.044166	-1.40288e-13	-0.041728	-1.09113e-13	-0.040884	-4.67628e-14	-0.0466353	-1.40288e-13	-0.0488233	-6.23504e-14	-0.0534806	-6.23504e-14	-0.0557936	-7.79381e-14	-0.0465103	-3.11752e-14	-0.0493546	-1.24701e-13	-0.0582316	-1.09113e-13
0.0444	-0.044166	-9.35257e-14	-0.0416029	-1.09113e-13	-0.0407903	0	-0.0467291	-4.67628e-14	-0.0486045	1.55876e-14	-0.0534493	-1.55876e-14	-0.0560124	-4.67628e-14	-0.0461664	-6.23504e-14	-0.0492921	-1.71464e-13	-0.0584504	-4.67628e-14
0.0445	-0.0440722	-1.55876e-14	-0.0416029	-1.09113e-13	-0.040884	-1.09113e-13	-0.0466978	-4.67628e-14	-0.0486045	-1.40288e-13	-0.0536681	-4.67628e-14	-0.055731	-6.23504e-14	-0.046229	-1.87051e-13	-0.0494484	-9.35257e-14	-0.0585754	-1.55876e-14
0.0446	-0.0442285	-7.79381e-14	-0.0416029	-1.40288e-13	-0.040884	-7.79381e-14	-0.0464477	-1.24701e-13	-0.0487295	-1.09113e-13	-0.0534806	0	-0.0557936	-2.02639e-13	-0.0461039	-1.24701e-13	-0.0493234	6.23504e-14	-0.0582941	-9.35257e-14
0.0447	-0.0441035	-4.67628e-14	-0.0416654	4.67628e-14	-0.0408215	-6.23504e-14	-0.0465728	-1.40288e-13	-0.0486045	1.55876e-14	-0.0533868	-1.87051e-13	-0.0558248	-9.35257e-14	-0.0460414	-6.23504e-14	-0.0495422	-1.24701e-13	-0.0582629	-1.40288e-13
0.0448	-0.0442598	-4.67628e-14	-0.0414466	-7.79381e-14	-0.0408528	-1.40288e-13	-0.046604	-4.67628e-14	-0.048792	-7.79381e-14	-0.0535118	-7.79381e-14	-0.0559186	-1.55876e-14	-0.0462602	-3.11752e-14	-0.0493859	-1.09113e-13	-0.0583566	-1.24701e-13
0.0449	-0.0442598	-1.55876e-14	-0.0416342	-1.71464e-13	-0.0409465	-3.11752e-14	-0.046479	-3.11752e-14	-0.0487608	-3.11752e-14	-0.0536056	-1.55876e-14	-0.0559186	-4.67628e-14	-0.0462602	0	-0.0495109	-3.11752e-14	-0.0581066	-7.79381e-14
0.045	-0.0441035	-9.35257e-14	-0.0416967	0	-0.0408215	-1.09113e-13	-0.0466353	-1.24701e-13	-0.0487295	-7.79381e-14	-0.0536368	-4.67628e-14	-0.0560124	-7.79381e-14	-0.0461977	-7.79381e-14	-0.0495109	-7.79381e-14	-0.0583879	-4.67628e-14
0.0451	-0.044291	-9.35257e-14	-0.041728	3.11752e-14	-0.0408528	-1.24701e-13	-0.0466665	-3.11752e-14	-0.0486982	-7.79381e-14	-0.0536056	-4.67628e-14	-0.0561999	0	-0.0461664	-1.24701e-13	-0.0493546	-7.79381e-14	-0.0583254	-1.55876e-14
0.0452	-0.0443223	-3.11752e-14	-0.0416967	-9.35257e-14	-0.0408215	-3.11752e-14	-0.0465415	-4.67628e-14	-0.0486357	-6.23504e-14	-0.0535431	-6.23504e-14	-0.0560749	-7.79381e-14	-0.0462915	-9.35257e-14	-0.0492296	-1.09113e-13	-0.0584817	-7.79381e-14
0.0453	-0.0445098	-4.67628e-14	-0.0416654	-6.23504e-14	-0.0407903	-1.40288e-13	-0.0465415	-9.35257e-14	-0.0486357	-7.79381e-14	-0.0535118	-9.35257e-14	-0.0561374	-1.09113e-13	-0.0462602	4.67628e-14	-0.0493234	-1.24701e-13	-0.0582941	-6.23504e-14
0.0454	-0.044291	-7.79381e-14	-0.0415404	-9.35257e-14	-0.0409465	-3.11752e-14	-0.0465415	-1.09113e-13	-0.0486357	-4.67628e-14	-0.0535118	-6.23504e-14	-0.0561686	-3.11752e-14	-0.0459164	-9.35257e-14	-0.0492921	-4.67628e-14	-0.0581066	-1.24701e-13
0.0455	-0.0443848	-1.24701e-13	-0.0416029	-1.09113e-13	-0.0408528	1.55876e-14	-0.0464477	0	-0.0486045	-7.79381e-14	-0.053293	-1.09113e-13	-0.0559498	-6.23504e-14	-0.0461977	-1.87051e-13	-0.0493234	-9.35257e-14	-0.0582003	-1.71464e-13
0.0456	-0.0441973	-3.11752e-14	-0.0416654	3.11752e-14	-0.0409465	-1.09113e-13	-0.0464165	-1.09113e-13	-0.0486357	-6.23504e-14	-0.053418	-1.55876e-13	-0.0561061	-1.40288e-13	-0.0461039	0	-0.0493859	-6.23504e-14	-0.057919	-1.09113e-13
0.0457	-0.0443223	-1.40288e-13	-0.0415092	-1.09113e-13	-0.0408528	-6.23504e-14	-0.0465728	-6.23504e-14	-0.0486045	-6.23504e-14	-0.0534493	-4.67628e-14	-0.0561374	3.11752e-14	-0.0460414	-6.23504e-14	-0.0491984	-9.35257e-14	-0.0581691	-4.67628e-14
0.0458	-0.0443223	-4.67628e-14	-0.0414779	-7.79381e-14	-0.0409465	-1.09113e-13	-0.046604	0	-0.0486982	-7.79381e-14	-0.0535743	-4.67628e-14	-0.0561061	-3.11752e-14	-0.0460414	-6.23504e-14	-0.0491358	-1.09113e-13	-0.0582316	4.67628e-14
0.0459	-0.044166	-7.79381e-14	-0.0415717	-7.79381e-14	-0.0406027	-7.79381e-14	-0.0465103	-7.79381e-14	-0.0486357	-6.23504e-14	-0.0534493	-6.23504e-14	-0.0559811	-1.40288e-13	-0.0460414	-7.79381e-14	-0.0491671	-1.24701e-13	-0.0581378	-7.79381e-14
0.046	-0.0441347	-1.40288e-13	-0.0417592	-6.23504e-14	-0.0406652	-1.24701e-13	-0.046604	-7.79381e-14	-0.0484482	-9.35257e-14	-0.0532618	-1.55876e-13	-0.0560124	-4.67628e-14	-0.0461664	-7.79381e-14	-0.0492609	-6.23504e-14	-0.0583254	-1.09113e-13
0.0461	-0.0441973	-1.09113e-13	-0.041728	3.11752e-14	-0.0408215	0	-0.0465103	-6.23504e-14	-0.0484169	-1.09113e-13	-0.0532618	-9.35257e-14	-0.0561374	-7.79381e-14	-0.0462915	-4.67628e-14	-0.0492609	-4.67628e-14	-0.0581378	-3.11752e-14
0.0462	-0.044291	0	-0.041728	-7.79381e-14	-0.0406652	-1.55876e-14	-0.046604	-7.79381e-14	-0.0485732	-4.67628e-14	-0.0534493	-6.23504e-14	-0.0561374	-1.55876e-14	-0.0460102	-7.79381e-14	-0.0493234	-7.79381e-14	-0.0583254	-1.24701e-13
0.0463	-0.0441973	-3.11752e-14	-0.0415404	-1.40288e-13	-0.040634	-3.11752e-14	-0.0464477	-9.35257e-14	-0.0485107	-3.11752e-14	-0.0536056	1.55876e-14	-0.0560749	-7.79381e-14	-0.0462915	-1.40288e-13	-0.0493234	-4.67628e-14	-0.0582629	-9.35257e-14
0.0464	-0.0441035	-1.55876e-13	-0.0416967	-6.23504e-14	-0.0408215	1.55876e-14	-0.0464165	-1.09113e-13	-0.0484169	-7.79381e-14	-0.053418	-9.35257e-14	-0.0560436	-1.55876e-13	-0.0460727	-4.67628e-14	-0.0491358	-6.23504e-14	-0.0584504	-1.24701e-13
0.0465	-0.044291	-7.79381e-14	-0.041728	-6.23504e-14	-0.040759	3.11752e-14	-0.0464477	-4.67628e-14	-0.0484794	-1.09113e-13	-0.053418	-1.40288e-13	-0.0559811	-6.23504e-14	-0.0461039	-9.35257e-14	-0.0491984	-1.24701e-13	-0.0583566	1.55876e-14
0.0466	-0.0441347	-7.79381e-14	-0.0416654	-6.23504e-14	-0.0406652	-4.67628e-14	-0.0465415	-7.79381e-14	-0.0485107	0	-0.0536368	-6.23504e-14	-0.0560124	-7.79381e-14	-0.0460414	-1.09113e-13	-0.0491984	-7.79381e-14	-0.0582629	-1.55876e-13
0.0467	-0.044166	0	-0.0416342	-9.35257e-14	-0.0407277	-1.24701e-13	-0.046479	-4.67628e-14	-0.0487295	0	-0.0536681	3.11752e-14	-0.0559186	-7.79381e-14	-0.0459164	-1.09113e-13	-0.0491671	-9.35257e-14	-0.0582629	-1.24701e-13
0.0468	-0.0441973	-6.23504e-14	-0.0416967	-1.24701e-13	-0.0406027	-7.79381e-14	-0.0464477	-1.09113e-13	-0.048792	0	-0.0536681	-7.79381e-14	-0.0561061	-9.35257e-14	-0.0460414	-9.35257e-14	-0.0490733	-9.35257e-14	-0.0583566	-6.23504e-14
0.0469	-0.0443535	-1.09113e-13	-0.041728	-9.35257e-14	-0.0406965	-4.67628e-14	-0.046479	-7.79381e-14	-0.0486982	-4.67628e-14	-0.0534493	-7.79381e-14	-0.0562312	0	-0.0458851	-6.23504e-14	-0.0491671	-6.23504e-14	-0.0583566	-7.79381e-14
0.047	-0.0443223	-3.11752e-14	-0.0416967	-9.35257e-14	-0.040759	0	-0.0464165	-6.23504e-14	-0.0484794	-4.67628e-14	-0.0536056	-2.02639e-13	-0.0560124	-3.11752e-14	-0.0459164	-1.09113e-13	-0.0491984	-3.11752e-14	-0.0582316	1.55876e-14
0.0471	-0.0443223	-1.09113e-13	-0.0416654	-1.24701e-13	-0.0408215	-3.11752e-14	-0.0465103	-1.09113e-13	-0.048667	-2.02639e-13	-0.0535118	-4.67628e-14	-0.0561061	-1.40288e-13	-0.0458539	-7.79381e-14	-0.0492609	-3.11752e-14	-0.0581691	-1.09113e-13
0.0472	-0.044041	-1.55876e-13	-0.0416654	-7.79381e-14	-0.0407903	0	-0.0464165	-7.79381e-14	-0.048667	-3.11752e-14	-0.0535118	-1.09113e-13	-0.0560749	-4.67628e-14	-0.0460102	-4.67628e-14	-0.0493546	-1.09113e-13	-0.0581691	-7.79381e-14
0.0473	-0.0443223	-9.35257e-14	-0.0416342	-4.67628e-14	-0.040759	-9.35257e-14	-0.0462915	-1.24701e-13	-0.0486045	-4.67628e-14	-0.0533555	-1.09113e-13	-0.0560436	-1.24701e-13	-0.0459789	0	-0.0491671	-9.35257e-14	-0.0581691	-9.35257e-14
0.0474	-0.0443848	-1.55876e-14	-0.0417905	-6.23504e-14	-0.0407903	-1.09113e-13	-0.0462602	-1.09113e-13	-0.0485107	-1.24701e-13	-0.0535431	-9.35257e-14	-0.0557936	-9.35257e-14	-0.0459164	-6.23504e-14	-0.0491671	-9.35257e-14	-0.0582316	-7.79381e-14
0.0475	-0.044166	-6.23504e-14	-0.0416029	-4.67628e-14	-0.040759	-3.11752e-14	-0.0463852	1.55876e-14	-0.048542	-7.79381e-14	-0.053418	0	-0.0558561	-1.24701e-13	-0.0459476	-3.11752e-14	-0.0491671	-7.79381e-14	-0.0582941	-9.35257e-14
0.0476	-0.0440722	-1.09113e-13	-0.0416654	-1.40288e-13	-0.040759	-1.09113e-13	-0.0464165	-3.11752e-14	-0.0485732	-3.11752e-14	-0.053418	-7.79381e-14	-0.0558873	-7.79381e-14	-0.0458226	-1.09113e-13	-0.0490108	-1.09113e-13	-0.0582316	0
0.0477	-0.044166	-1.55876e-13	-0.0416029	-6.23504e-14	-0.0407277	-6.23504e-14	-0.0464165	0	-0.0486045	-1.55876e-14	-0.0535743	-1.55876e-14	-0.0557936	-4.67628e-14	-0.0457288	-1.40288e-13	-0.0491358	-9.35257e-14	-0.0580753	-4.67628e-14
0.0478	-0.044166	-9.35257e-14	-0.0415404	-9.35257e-14	-0.0408528	0	-0.0465415	0	-0.0484482	-7.79381e-14	-0.0534806	0	-0.0558873	-6.23504e-14	-0.0457288	-9.35257e-14	-0.0491984	-7.79381e-14	-0.0580753	-1.09113e-13
0.0479	-0.0441347	-1.55876e-14	-0.0416967	-9.35257e-14	-0.0409778	-3.11752e-14	-0.0462915	-9.35257e-14	-0.0486982	-6.23504e-14	-0.0535431	-1.40288e-13	-0.0558873	-1.55876e-14	-0.0458226	-6.23504e-14	-0.0491671	0	-0.0581691	-1.09113e-13
0.048	-0.0442285	1.55876e-14	-0.0417905	3.11752e-14	-0.0409153	-3.11752e-14	-0.046354	-1.71464e-13	-0.048667	0	-0.0534806	-4.67628e-14	-0.0558248	-4.67628e-14	-0.0457914	1.55876e-14	-0.0491984	-7.79381e-14	-0.0581691	1.55876e-14
0.0481	-0.0441973	-7.79381e-14	-0.0417905	-7.79381e-14	-0.040884	-1.09113e-13	-0.046604	0	-0.0486045	-3.11752e-14	-0.0535118	-1.24701e-13	-0.0558561	-4.67628e-14	-0.0459476	-4.67628e-14	-0.0491671	-3.11752e-14	-0.0582316	-6.23504e-14
0.0482	-0.0442285	-4.67628e-14	-0.0417592	-4.67628e-14	-0.040884	-1.09113e-13	-0.0463227	-6.23504e-14	-0.048542	-6.23504e-14	-0.0535431	0	-0.0560124	-1.55876e-13	-0.0456976	-4.67628e-14	-0.0491358	-7.79381e-14	-0.0581378	-1.55876e-14
0.0483	-0.044166	-3.11752e-14	-0.041728	-7.79381e-14	-0.0408528	-7.79381e-14	-0.0461664	-1.09113e-13	-0.0488233	-1.09113e-13	-0.0537306	-6.23504e-14	-0.0560436	0	-0.0456351	-1.40288e-13	-0.0489483	-1.40288e-13	-0.0584191	-1.09113e-13
0.0484	-0.0441347	-1.24701e-13	-0.0417592	-7.79381e-14	-0.040884	-9.35257e-14	-0.0465103	-1.24701e-13	-0.0487608	3.11752e-14	-0.0536056	-1.24701e-13	-0.055731	-4.67628e-14	-0.0456663	-9.35257e-14	-0.0492921	-3.11752e-14	-0.0584191	3.11752e-14
0.0485	-0.0441973	-7.79381e-14	-0.0415092	-1.24701e-13	-0.0408528	4.67628e-14	-0.0463852	1.55876e-14	-0.0486982	-1.09113e-13	-0.0533868	-6.23504e-14	-0.0560749	-1.40288e-13	-0.0457601	-4.67628e-14	-0.0491046	0	-0.0584504	-4.67628e-14
0.0486	-0.0443535	-7.79381e-14	-0.0415404	-1.24701e-13	-0.0409465	-9.35257e-14	-0.0461977	-1.24701e-13	-0.048667	-7.79381e-14	-0.0532618	-7.79381e-14	-0.0560749	-1.55876e-14	-0.0458851	1.55876e-14	-0.0491358	-1.71464e-13	-0.0583566	-7.79381e-14
0.0487	-0.0442285	3.11752e-14	-0.041728	-7.79381e-14	-0.0409465	-7.79381e-14	-0.0464165	-4.67628e-14	-0.048667	-1.55876e-13	-0.0534493	-7.79381e-14	-0.0561061	-3.11752e-14	-0.0456663	-6.23504e-14	-0.0492609	-9.35257e-14	-0.0582629	-1.40288e-13
0.0488	-0.0442598	-1.24701e-13	-0.0418217	-4.67628e-14	-0.0409153	-3.11752e-14	-0.0464165	-7.79381e-14	-0.0485107	-9.35257e-14	-0.0535431	0	-0.0561374	-9.35257e-14	-0.0457914	-1.09113e-13	-0.0493546	-6.23504e-14	-0.0582941	-1.09113e-13
0.0489	-0.0441973	-1.09113e-13	-0.0417905	-4.67628e-14	-0.0408215	-9.35257e-14	-0.0464477	-3.11752e-14	-0.0486045	-1.87051e-13	-0.0535743	0	-0.0560124	-4.67628e-14	-0.0460414	-4.67628e-14	-0.0494484	-6.23504e-14	-0.0582003	-9.35257e-14
0.049	-0.0442285	-1.40288e-13	-0.041728	-6.23504e-14	-0.040884	-1.24701e-13	-0.046354	-4.67628e-14	-0.048542	-1.09113e-13	-0.0536368	-1.24701e-13	-0.0560124	-1.71464e-13	-0.0460102	0	-0.0492921	-6.23504e-14	-0.0582941	-6.23504e-14
0.0491	-0.0443848	1.55876e-14	-0.0418842	-7.79381e-14	-0.0410403	1.55876e-14	-0.046479	-7.79381e-14	-0.0486357	-6.23504e-14	-0.0537619	3.11752e-14	-0.0561686	-7.79381e-14	-0.0459164	-6.23504e-14	-0.0492296	-1.09113e-13	-0.0583254	-7.79381e-14
0.0492	-0.0443223	-3.11752e-14	-0.0418842	-4.67628e-14	-0.040884	-4.67628e-14	-0.0464477	-1.55876e-14	-0.0485732	-1.09113e-13	-0.0536056	-1.55876e-14	-0.0560436	1.55876e-14	-0.0457288	-7.79381e-14	-0.0491358	-6.23504e-14	-0.0582941	-4.67628e-14
0.0493	-0.044291	-9.35257e-14	-0.0418217	-7.79381e-14	-0.0409465	-1.24701e-13	-0.046479	-9.35257e-14	-0.0486357	-4.67628e-14	-0.0536368	-1.24701e-13	-0.0559186	-1.87051e-13	-0.0456663	-1.40288e-13	-0.0491358	-1.55876e-13	-0.0582941	-9.35257e-14
0.0494	-0.044291	-1.09113e-13	-0.041853	-1.40288e-13	-0.0409465	-7.79381e-14	-0.0464165	-1.09113e-13	-0.0485107	-9.35257e-14	-0.0536993	0	-0.0558248	-1.24701e-13	-0.0458539	-1.55876e-13	-0.0489796	-9.35257e-14	-0.0583566	-6.23504e-14
0.0495	-0.0442598	-9.35257e-14	-0.0420405	1.55876e-14	-0.0407903	-4.67628e-14	-0.0462602	-7.79381e-14	-0.0487295	-6.23504e-14	-0.0535118	-7.79381e-14	-0.0559186	-1.40288e-13	-0.0457601	-4.67628e-14	-0.0491984	-6.23504e-14	-0.0584191	-9.35257e-14
0.0496	-0.0442598	-6.23504e-14	-0.0417905	-1.40288e-13	-0.0408215	-2.02639e-13	-0.046354	-1.55876e-13	-0.0484794	-1.55876e-14	-0.0532618	-1.55876e-13	-0.0561374	4.67628e-14	-0.0458226	-6.23504e-14	-0.0491046	1.55876e-14	-0.0584191	-1.55876e-14
0.0497	-0.044291	-4.67628e-14	-0.0418217	-1.40288e-13	-0.040884	-4.67628e-14	-0.046354	-6.23504e-14	-0.0485107	-1.09113e-13	-0.0535118	-9.35257e-14	-0.0561374	0	-0.0457601	-9.35257e-14	-0.0489483	-1.24701e-13	-0.0583566	-1.24701e-13
0.0498	-0.0442285	-1.24701e-13	-0.041853	-6.23504e-14	-0.0409153	7.79381e-14	-0.0463852	-7.79381e-14	-0.048542	-7.79381e-14	-0.0534493	-3.11752e-14	-0.0559811	-1.09113e-13	-0.0456976	-4.67628e-14	-0.0489796	-7.79381e-14	-0.0583879	-1.24701e-13
0.0499	-0.0442598	-7.79381e-14	-0.041853	-7.79381e-14	-0.0407277	-9.35257e-14	-0.0464477	-1.24701e-13	-0.0487295	-7.79381e-14	-0.0535118	-3.11752e-14	-0.0558248	-1.55876e-13	-0.0456976	-1.09113e-13	-0.0491046	-6.23504e-14	-0.0582316	-7.79381e-14
0.05	-0.0442598	-1.09113e-13	-0.0417905	-6.23504e-14	-0.0408215	-1.71464e-13	-0.0462602	0	-0.0488233	-4.67628e-14	-0.0536368	-7.79381e-14	-0.0560124	-6.23504e-14	-0.0457914	-1.09113e-13	-0.0491046	-3.11752e-14	-0.0582316	-1.09113e-13
0.0501	-0.0444786	-1.55876e-14	-0.0417592	-7.79381e-14	-0.040759	-1.24701e-13	-0.0463852	-1.55876e-14	-0.0487608	-9.35257e-14	-0.0535118	-6.23504e-14	-0.0559498	-3.11752e-14	-0.0456663	0	-0.0489796	-6.23504e-14	-0.0583566	-6.23504e-14
0.0502	-0.0443848	-7.79381e-14	-0.041728	-7.79381e-14	-0.040884	1.55876e-14	-0.0465415	1.55876e-14	-0.0486045	-9.35257e-14	-0.0534493	-9.35257e-14	-0.0558561	-9.35257e-14	-0.0460727	-1.09113e-13	-0.048917	-1.24701e-13	-0.0584191	-6.23504e-14
0.0503	-0.0441973	-6.23504e-14	-0.041853	-1.09113e-13	-0.040759	-3.11752e-14	-0.0465415	-3.11752e-14	-0.0486045	-1.55876e-13	-0.0534806	-3.11752e-14	-0.0561061	-4.67628e-14	-0.0458226	-6.23504e-14	-0.0488545	-1.09113e-13	-0.0582629	-9.35257e-14
0.0504	-0.0442598	-2.18227e-13	-0.041728	0	-0.0408215	-1.24701e-13	-0.0464165	-1.55876e-14	-0.0487608	-7.79381e-14	-0.0533868	-1.09113e-13	-0.0559186	0	-0.0456351	-1.24701e-13	-0.0488545	-1.55876e-13	-0.0580753	-1.55876e-13
0.0505	-0.0442598	-4.67628e-14	-0.0416967	-6.23504e-14	-0.0408528	-1.24701e-13	-0.046479	-1.09113e-13	-0.048667	-4.67628e-14	-0.0535431	-9.35257e-14	-0.0558561	-1.24701e-13	-0.0458226	-9.35257e-14	-0.048917	-6.23504e-14	-0.0581691	-7.79381e-14
0.0506	-0.0444161	-4.67628e-14	-0.0416967	-4.67628e-14	-0.0407903	-7.79381e-14	-0.046479	-1.09113e-13	-0.0486982	-4.67628e-14	-0.0535743	-4.67628e-14	-0.0559498	-7.79381e-14	-0.0458539	-1.55876e-14	-0.0489796	-3.11752e-14	-0.0582003	0
0.0507	-0.0443223	-1.24701e-13	-0.0417592	-7.79381e-14	-0.0408215	-6.23504e-14	-0.046354	-7.79381e-14	-0.0485732	-9.35257e-14	-0.0536993	0	-0.0559498	0	-0.0457601	1.55876e-14	-0.0491984	1.55876e-14	-0.0582316	-6.23504e-14
0.0508	-0.0442285	-1.87051e-13	-0.0415717	-7.79381e-14	-0.0406965	-1.55876e-14	-0.0465103	-1.09113e-13	-0.0486982	-4.67628e-14	-0.0535743	0	-0.0560436	-7.79381e-14	-0.0456351	-1.09113e-13	-0.0489796	-1.24701e-13	-0.0580441	-6.23504e-14
0.0509	-0.0443223	1.55876e-14	-0.0416967	-9.35257e-14	-0.0407277	-9.35257e-14	-0.0464477	-3.11752e-14	-0.0486982	-4.67628e-14	-0.0536681	-1.24701e-13	-0.0559498	-1.09113e-13	-0.0457288	-1.40288e-13	-0.0490733	-6.23504e-14	-0.0581691	-1.55876e-13
0.051	-0.0443223	-6.23504e-14	-0.0416654	-1.09113e-13	-0.0407903	-4.67628e-14	-0.0463852	-6.23504e-14	-0.0486982	-7.79381e-14	-0.0535743	-6.23504e-14	-0.0559186	-1.40288e-13	-0.0457288	-1.09113e-13	-0.0488858	-1.24701e-13	-0.0583254	-3.11752e-14
0.0511	-0.0442598	-6.23504e-14	-0.041728	-9.35257e-14	-0.040759	-1.09113e-13	-0.0465103	-7.79381e-14	-0.0487608	-1.40288e-13	-0.0536056	-6.23504e-14	-0.0560436	0	-0.0456663	-9.35257e-14	-0.0488233	-1.55876e-13	-0.0581691	0
0.0512	-0.0444161	-4.67628e-14	-0.0418842	-1.55876e-14	-0.0409153	-4.67628e-14	-0.046604	-4.67628e-14	-0.0486357	-6.23504e-14	-0.0535431	-9.35257e-14	-0.0560124	-1.55876e-14	-0.0456038	-1.09113e-13	-0.0489483	-1.40288e-13	-0.0582003	-1.40288e-13
0.0513	-0.0442598	-3.11752e-14	-0.0418217	-4.67628e-14	-0.0411653	3.11752e-14	-0.0465728	-6.23504e-14	-0.0486045	-1.24701e-13	-0.0535743	-7.79381e-14	-0.0559186	-9.35257e-14	-0.0457288	-1.40288e-13	-0.0490108	-3.11752e-14	-0.0582941	-9.35257e-14
0.0514	-0.0442598	-1.87051e-13	-0.0418217	-1.09113e-13	-0.0409153	-3.11752e-14	-0.0466665	-4.67628e-14	-0.0485107	-6.23504e-14	-0.053418	-7.79381e-14	-0.0559186	-1.24701e-13	-0.0456351	0	-0.0490421	0	-0.0581378	-4.67628e-14
0.0515	-0.0444473	-4.67628e-14	-0.0418217	-9.35257e-14	-0.0410716	-1.24701e-13	-0.0467291	-9.35257e-14	-0.0486045	-9.35257e-14	-0.0533555	-9.35257e-14	-0.0558561	-9.35257e-14	-0.0458226	-9.35257e-14	-0.0490421	-6.23504e-14	-0.0581378	-1.09113e-13
0.0516	-0.0444161	3.11752e-14	-0.0417905	-4.67628e-14	-0.0409465	-7.79381e-14	-0.0465728	-3.11752e-14	-0.0485732	-6.23504e-14	-0.0533868	-3.11752e-14	-0.0559811	-1.24701e-13	-0.0456663	-7.79381e-14	-0.0491046	-6.23504e-14	-0.0579503	-1.09113e-13
0.0517	-0.0443848	-7.79381e-14	-0.0420093	-6.23504e-14	-0.0409465	-9.35257e-14	-0.046354	-1.55876e-13	-0.0485732	0	-0.0535118	-4.67628e-14	-0.0559811	0	-0.0458226	-1.40288e-13	-0.0490108	-7.79381e-14	-0.0580441	-1.55876e-13
0.0518	-0.0443848	-1.09113e-13	-0.041728	-6.23504e-14	-0.0408528	-1.09113e-13	-0.0463852	-1.55876e-13	-0.0486045	-4.67628e-14	-0.0535431	-6.23504e-14	-0.0560124	-9.35257e-14	-0.0458851	1.55876e-14	-0.0491671	-7.79381e-14	-0.0580128	-4.67628e-14
0.0519	-0.0444161	-9.35257e-14	-0.0418842	-1.40288e-13	-0.040884	-7.79381e-14	-0.0464477	-9.35257e-14	-0.0487295	-3.11752e-14	-0.0537306	-6.23504e-14	-0.0559186	-1.40288e-13	-0.0457601	-9.35257e-14	-0.0489483	-3.11752e-14	-0.0581691	0
0.052	-0.0442285	-9.35257e-14	-0.0418217	-4.67628e-14	-0.0409465	-6.23504e-14	-0.0466353	-4.67628e-14	-0.0487608	-7.79381e-14	-0.0535431	-4.67628e-14	-0.0558873	-1.24701e-13	-0.0455726	-1.71464e-13	-0.0491984	-7.79381e-14	-0.0583254	0
0.0521	-0.0443535	-7.79381e-14	-0.041728	-1.09113e-13	-0.041009	-4.67628e-14	-0.046479	0	-0.0485107	-9.35257e-14	-0.0535431	-1.24701e-13	-0.0559498	-7.79381e-14	-0.0454788	-1.55876e-13	-0.0490108	-9.35257e-14	-0.0582941	6.23504e-14
0.0522	-0.0443223	-4.67628e-14	-0.0417905	-1.55876e-13	-0.0411028	1.55876e-14	-0.0463852	-1.24701e-13	-0.0486357	-1.87051e-13	-0.053418	-9.35257e-14	-0.0558873	-4.67628e-14	-0.0455726	-9.35257e-14	-0.048792	-1.71464e-13	-0.0582941	-9.35257e-14
0.0523	-0.0444161	-1.09113e-13	-0.0417905	-6.23504e-14	-0.0410403	-1.40288e-13	-0.046354	-1.40288e-13	-0.048667	-3.11752e-14	-0.0535431	-4.67628e-14	-0.0559498	-6.23504e-14	-0.0456976	-4.67628e-14	-0.0490421	-6.23504e-14	-0.0582629	-1.09113e-13
0.0524	-0.0444786	-3.11752e-14	-0.0416967	0	-0.0409778	-1.40288e-13	-0.046479	0	-0.0485732	-9.35257e-14	-0.0536056	1.55876e-14	-0.0559498	-4.67628e-14	-0.0456663	-6.23504e-14	-0.0490108	3.11752e-14	-0.0582941	-1.55876e-13
0.0525	-0.0442285	-4.67628e-14	-0.0416654	0	-0.0410403	-4.67628e-14	-0.046479	-6.23504e-14	-0.0485107	-4.67628e-14	-0.0535743	-7.79381e-14	-0.0559186	-1.40288e-13	-0.0457288	-9.35257e-14	-0.0490421	-6.23504e-14	-0.0583879	-1.55876e-14
0.0526	-0.0443848	-7.79381e-14	-0.041853	-6.23504e-14	-0.0407903	-6.23504e-14	-0.0464165	-3.11752e-14	-0.0484482	-9.35257e-14	-0.0533868	-6.23504e-14	-0.0558561	-4.67628e-14	-0.0457601	-6.23504e-14	-0.0492296	-4.67628e-14	-0.0582941	-9.35257e-14
0.0527	-0.0443535	-7.79381e-14	-0.0418842	1.55876e-14	-0.0409153	-1.87051e-13	-0.0464165	-9.35257e-14	-0.0485732	-9.35257e-14	-0.0536368	-1.40288e-13	-0.0558873	-1.40288e-13	-0.0457914	-4.67628e-14	-0.0491671	0	-0.0583254	-1.09113e-13
0.0528	-0.044291	-3.11752e-14	-0.0416654	-4.67628e-14	-0.0411341	1.55876e-14	-0.0465103	-9.35257e-14	-0.048542	-7.79381e-14	-0.0535743	-4.67628e-14	-0.0559498	-3.11752e-14	-0.0457914	-3.11752e-14	-0.0490108	-1.40288e-13	-0.0582629	-9.35257e-14
0.0529	-0.0441973	-6.23504e-14	-0.041728	-1.40288e-13	-0.0410403	3.11752e-14	-0.0465728	-4.67628e-14	-0.048542	-3.11752e-14	-0.0535118	-1.09113e-13	-0.0560436	-4.67628e-14	-0.0459476	-1.09113e-13	-0.0490108	-1.55876e-13	-0.0582316	-6.23504e-14
0.053	-0.0443535	-6.23504e-14	-0.0416967	-1.24701e-13	-0.0409465	-6.23504e-14	-0.0465415	-3.11752e-14	-0.0486045	0	-0.0535431	-6.23504e-14	-0.0558248	-9.35257e-14	-0.0458226	-6.23504e-14	-0.0491046	-6.23504e-14	-0.0584191	0
0.0531	-0.0443223	-4.67628e-14	-0.041728	-6.23504e-14	-0.0407277	-1.09113e-13	-0.046604	-7.79381e-14	-0.0485107	-7.79381e-14	-0.0535431	-1.55876e-13	-0.0558561	-7.79381e-14	-0.0456038	-1.09113e-13	-0.0491046	0	-0.0584191	0
0.0532	-0.0444786	-1.55876e-14	-0.0417592	0	-0.0409153	-7.79381e-14	-0.0465103	-6.23504e-14	-0.0484169	-1.24701e-13	-0.0535743	-7.79381e-14	-0.0558873	-1.24701e-13	-0.0456663	-2.02639e-13	-0.0491671	-9.35257e-14	-0.0582629	-7.79381e-14
0.0533	-0.0443848	0	-0.041728	-1.09113e-13	-0.0408215	-3.11752e-14	-0.0465415	-1.24701e-13	-0.048542	-1.09113e-13	-0.0536056	-4.67628e-14	-0.0559498	-9.35257e-14	-0.0455726	-9.35257e-14	-0.0491358	-7.79381e-14	-0.0583879	-7.79381e-14
0.0534	-0.0442598	-1.24701e-13	-0.0416967	-4.67628e-14	-0.0408528	-9.35257e-14	-0.046354	-7.79381e-14	-0.0483544	-6.23504e-14	-0.0536056	-3.11752e-14	-0.055731	-6.23504e-14	-0.0457288	0	-0.0492921	-1.55876e-14	-0.0583566	-6.23504e-14
0.0535	-0.0444161	-6.23504e-14	-0.0418217	-4.67628e-14	-0.0407277	-4.67628e-14	-0.0465415	-6.23504e-14	-0.0485732	-6.23504e-14	-0.0535431	-1.09113e-13	-0.0557936	-1.40288e-13	-0.0459476	0	-0.0491671	-4.67628e-14	-0.0583254	-1.24701e-13
0.0536	-0.0442285	-4.67628e-14	-0.0417592	-3.11752e-14	-0.0408215	-1.09113e-13	-0.0463852	-6.23504e-14	-0.0486045	0	-0.0534493	-9.35257e-14	-0.0557936	-9.35257e-14	-0.0460414	-1.55876e-14	-0.0490421	-1.40288e-13	-0.0583254	-9.35257e-14
0.0537	-0.044166	-1.24701e-13	-0.041728	-6.23504e-14	-0.0408215	-3.11752e-14	-0.0464477	-7.79381e-14	-0.0487295	-6.23504e-14	-0.0534493	-9.35257e-14	-0.0557936	-4.67628e-14	-0.0457914	-1.55876e-14	-0.0490421	-1.40288e-13	-0.0582003	-1.24701e-13
0.0538	-0.044166	-9.35257e-14	-0.041853	-7.79381e-14	-0.040759	-3.11752e-14	-0.046604	-4.67628e-14	-0.0486357	-7.79381e-14	-0.053418	-4.67628e-14	-0.055606	0	-0.0458226	-9.35257e-14	-0.0490733	-9.35257e-14	-0.0582629	-1.09113e-13
0.0539	-0.044291	-9.35257e-14	-0.041853	-3.11752e-14	-0.040759	-9.35257e-14	-0.046604	-4.67628e-14	-0.0486982	-1.55876e-13	-0.0536056	-6.23504e-14	-0.0557936	-9.35257e-14	-0.0459164	-1.55876e-13	-0.0490733	-6.23504e-14	-0.0582316	-6.23504e-14
0.054	-0.0441347	0	-0.041853	-1.09113e-13	-0.0407903	-7.79381e-14	-0.0464165	-6.23504e-14	-0.0486045	-1.24701e-13	-0.0534806	-3.11752e-14	-0.0558561	0	-0.0458226	-4.67628e-14	-0.0489483	-6.23504e-14	-0.0582316	-4.67628e-14
0.0541	-0.0441973	-7.79381e-14	-0.041728	-9.35257e-14	-0.0407277	-3.11752e-14	-0.046479	-1.24701e-13	-0.0486045	-9.35257e-14	-0.0535118	-7.79381e-14	-0.0557936	-1.24701e-13	-0.0458851	-1.24701e-13	-0.0491046	-1.24701e-13	-0.0581691	-6.23504e-14
0.0542	-0.0442285	-1.40288e-13	-0.0417592	-1.24701e-13	-0.0409153	-7.79381e-14	-0.0462915	-9.35257e-14	-0.048792	-4.67628e-14	-0.0534806	-3.11752e-14	-0.0557623	-1.40288e-13	-0.0457288	-1.55876e-13	-0.0491358	-3.11752e-14	-0.0582629	-6.23504e-14
0.0543	-0.044166	-7.79381e-14	-0.0416654	-6.23504e-14	-0.040884	0	-0.0463852	-1.40288e-13	-0.0486982	-7.79381e-14	-0.0534493	-1.24701e-13	-0.0557623	-6.23504e-14	-0.0457601	0	-0.0490421	-6.23504e-14	-0.0582003	0
0.0544	-0.0441973	0	-0.0418217	-1.09113e-13	-0.0407277	-1.09113e-13	-0.0462915	-3.11752e-14	-0.0486045	-1.09113e-13	-0.0534493	-6.23504e-14	-0.0558248	-6.23504e-14	-0.0457288	-9.35257e-14	-0.048917	-6.23504e-14	-0.0582003	-3.11752e-14
0.0545	-0.0442285	-6.23504e-14	-0.041853	-4.67628e-14	-0.0407277	-9.35257e-14	-0.046229	-7.79381e-14	-0.0488858	-1.40288e-13	-0.0536993	-6.23504e-14	-0.0558248	-6.23504e-14	-0.0456663	-1.09113e-13	-0.0491358	-6.23504e-14	-0.0582941	-6.23504e-14
0.0546	-0.0442598	-7.79381e-14	-0.041853	-4.67628e-14	-0.0409153	-4.67628e-14	-0.0462602	-1.09113e-13	-0.0489483	4.67628e-14	-0.0533555	-6.23504e-14	-0.0558248	-6.23504e-14	-0.0454788	-6.23504e-14	-0.0489796	3.11752e-14	-0.0581691	-9.35257e-14
0.0547	-0.044041	-9.35257e-14	-0.0418217	-1.24701e-13	-0.0408215	0	-0.046229	-9.35257e-14	-0.0487608	-3.11752e-14	-0.0534493	-1.55876e-13	-0.0559811	0	-0.0455726	-1.55876e-13	-0.0489483	-6.23504e-14	-0.0583566	-1.24701e-13
0.0548	-0.0443848	-9.35257e-14	-0.041728	-1.24701e-13	-0.0407903	-6.23504e-14	-0.0463227	-7.79381e-14	-0.0487608	-1.71464e-13	-0.0535431	-1.55876e-14	-0.0560436	-6.23504e-14	-0.0456351	-6.23504e-14	-0.048917	-9.35257e-14	-0.0582629	-1.55876e-14
0.0549	-0.0442598	6.23504e-14	-0.0415717	0	-0.0408215	-9.35257e-14	-0.046229	-3.11752e-14	-0.0483857	-1.55876e-13	-0.0533868	-6.23504e-14	-0.0559498	-4.67628e-14	-0.0455726	-6.23504e-14	-0.0489483	-6.23504e-14	-0.0582003	-6.23504e-14
0.055	-0.0443535	-1.24701e-13	-0.0418217	-9.35257e-14	-0.040759	-1.09113e-13	-0.046354	-3.11752e-14	-0.0486045	-1.40288e-13	-0.0532305	-1.40288e-13	-0.0559498	-6.23504e-14	-0.0456976	0	-0.0488858	-7.79381e-14	-0.0582003	-1.40288e-13
0.0551	-0.0443223	-7.79381e-14	-0.0417592	-3.11752e-14	-0.040634	-9.35257e-14	-0.0464477	1.55876e-14	-0.0486357	3.11752e-14	-0.053168	-1.55876e-13	-0.0559498	-1.24701e-13	-0.0456663	-4.67628e-14	-0.0490733	3.11752e-14	-0.0582003	-9.35257e-14
0.0552	-0.0444473	-6.23504e-14	-0.0418842	-7.79381e-14	-0.0407903	-6.23504e-14	-0.0461977	-1.09113e-13	-0.048792	-6.23504e-14	-0.0534493	-6.23504e-14	-0.0558873	-9.35257e-14	-0.0456351	-6.23504e-14	-0.0491671	0	-0.0582003	-4.67628e-14
0.0553	-0.0443223	-1.55876e-14	-0.041853	-3.11752e-14	-0.0406965	-6.23504e-14	-0.046354	-1.71464e-13	-0.0486982	1.55876e-14	-0.053293	-3.11752e-14	-0.0559186	-6.23504e-14	-0.0455413	-7.79381e-14	-0.048917	-1.24701e-13	-0.0582629	-6.23504e-14
0.0554	-0.0443848	-9.35257e-14	-0.041853	0	-0.0405402	-9.35257e-14	-0.0463227	-6.23504e-14	-0.048667	-1.55876e-13	-0.0532618	-1.55876e-14	-0.0560749	-4.67628e-14	-0.0456663	-7.79381e-14	-0.0490108	-7.79381e-14	-0.0582003	-3.11752e-14
0.0555	-0.0442598	-7.79381e-14	-0.0418842	-9.35257e-14	-0.040759	0	-0.0463227	-1.40288e-13	-0.0486982	-6.23504e-14	-0.0535743	-1.09113e-13	-0.0560436	-3.11752e-14	-0.0457288	-6.23504e-14	-0.0490421	-4.67628e-14	-0.0582629	-6.23504e-14
0.0556	-0.044291	-7.79381e-14	-0.041978	-6.23504e-14	-0.0406027	3.11752e-14	-0.0461352	-7.79381e-14	-0.0488545	-3.11752e-14	-0.0534806	0	-0.0559811	-7.79381e-14	-0.0455726	-1.55876e-14	-0.0489796	-6.23504e-14	-0.0583566	-9.35257e-14
0.0557	-0.044291	-1.09113e-13	-0.041978	-7.79381e-14	-0.0405402	-7.79381e-14	-0.0463227	-9.35257e-14	-0.0488233	-7.79381e-14	-0.0535431	-1.55876e-14	-0.0560124	-7.79381e-14	-0.0455413	-9.35257e-14	-0.0490733	-7.79381e-14	-0.0582629	-7.79381e-14
0.0558	-0.0444161	-4.67628e-14	-0.0419468	-6.23504e-14	-0.0406027	-1.09113e-13	-0.0462915	-4.67628e-14	-0.0486357	-1.24701e-13	-0.0535743	-6.23504e-14	-0.0559498	-1.09113e-13	-0.0454788	-9.35257e-14	-0.0492609	-1.09113e-13	-0.0582316	-1.40288e-13
0.0559	-0.0443535	-6.23504e-14	-0.041978	-1.09113e-13	-0.0406965	-3.11752e-14	-0.0464477	-1.09113e-13	-0.0485107	-1.09113e-13	-0.0535118	-1.09113e-13	-0.0558873	-4.67628e-14	-0.045385	-6.23504e-14	-0.0490733	-6.23504e-14	-0.0582003	-7.79381e-14
0.056	-0.0443535	-1.24701e-13	-0.0420093	-7.79381e-14	-0.0405402	-1.55876e-14	-0.0463227	-6.23504e-14	-0.048667	-1.40288e-13	-0.0535431	-1.09113e-13	-0.0558873	-6.23504e-14	-0.0454788	-7.79381e-14	-0.0491671	-1.40288e-13	-0.0582003	-4.67628e-14
0.0561	-0.0442285	-9.35257e-14	-0.0420093	-4.67628e-14	-0.0405715	-1.24701e-13	-0.0464477	-9.35257e-14	-0.048542	-6.23504e-14	-0.0535743	-9.35257e-14	-0.0558873	-1.55876e-13	-0.0454163	-6.23504e-14	-0.0491358	-4.67628e-14	-0.0581691	-7.79381e-14
0.0562	-0.0442285	-7.79381e-14	-0.042103	-7.79381e-14	-0.0405402	0	-0.0464477	-9.35257e-14	-0.0485732	-7.79381e-14	-0.0534493	-1.55876e-14	-0.0558248	-3.11752e-14	-0.0452287	-9.35257e-14	-0.0492921	-4.67628e-14	-0.0581378	-6.23504e-14
0.0563	-0.0443848	-4.67628e-14	-0.0420405	3.11752e-14	-0.0407903	-6.23504e-14	-0.0463227	-3.11752e-14	-0.0486982	-9.35257e-14	-0.0534493	-1.40288e-13	-0.0561061	-3.11752e-14	-0.04526	-1.24701e-13	-0.0492296	-6.23504e-14	-0.0582941	-7.79381e-14
0.0564	-0.0442598	0	-0.0422281	-7.79381e-14	-0.0407277	-3.11752e-14	-0.0463227	-1.55876e-13	-0.0486045	4.67628e-14	-0.0533868	-1.40288e-13	-0.0560124	-4.67628e-14	-0.0454475	-3.11752e-14	-0.0492296	-7.79381e-14	-0.0581378	0
0.0565	-0.0441347	-1.40288e-13	-0.0422281	-7.79381e-14	-0.0406652	-1.24701e-13	-0.0463852	-3.11752e-14	-0.0487295	-4.67628e-14	-0.0534806	-3.11752e-14	-0.0560749	-7.79381e-14	-0.045385	0	-0.0493546	-1.09113e-13	-0.0582316	-1.24701e-13
0.0566	-0.0441973	-1.55876e-13	-0.0421968	-1.24701e-13	-0.0406027	-1.40288e-13	-0.0462915	-4.67628e-14	-0.0485107	-6.23504e-14	-0.0533868	-1.55876e-14	-0.0560124	-3.11752e-14	-0.0452287	-1.24701e-13	-0.0492921	-6.23504e-14	-0.0582003	-9.35257e-14
0.0567	-0.044166	-1.55876e-14	-0.0421343	-9.35257e-14	-0.0404464	-7.79381e-14	-0.046229	-1.24701e-13	-0.0482606	-2.18227e-13	-0.0534493	-1.09113e-13	-0.0560436	-9.35257e-14	-0.045135	-1.71464e-13	-0.0492921	-6.23504e-14	-0.0582629	-6.23504e-14
0.0568	-0.044166	-3.11752e-14	-0.0422593	-1.24701e-13	-0.0406027	-1.09113e-13	-0.0462602	-9.35257e-14	-0.0486982	-1.24701e-13	-0.0535118	-6.23504e-14	-0.0560436	-9.35257e-14	-0.0451037	-1.09113e-13	-0.0492609	-3.11752e-14	-0.0582941	-9.35257e-14
0.0569	-0.044166	-7.79381e-14	-0.0421656	-1.55876e-14	-0.0406027	-1.55876e-14	-0.0463852	-3.11752e-14	-0.0486982	1.09113e-13	-0.0533555	-6.23504e-14	-0.0558248	-1.24701e-13	-0.0451662	-6.23504e-14	-0.0492609	-4.67628e-14	-0.0581691	-6.23504e-14
0.057	-0.0442285	-1.55876e-14	-0.0421656	-1.40288e-13	-0.040759	-1.40288e-13	-0.0464165	0	-0.0485732	-1.40288e-13	-0.053293	-9.35257e-14	-0.0558873	-9.35257e-14	-0.0449474	-4.67628e-14	-0.0492921	-6.23504e-14	-0.0580128	-1.55876e-13
0.0571	-0.0441035	-6.23504e-14	-0.0422906	-4.67628e-14	-0.0407277	0	-0.0464165	-4.67628e-14	-0.0488233	-4.67628e-14	-0.0533243	-1.24701e-13	-0.0558561	-1.09113e-13	-0.0451037	-1.09113e-13	-0.0492609	-7.79381e-14	-0.0582316	-1.40288e-13
0.0572	-0.0439785	-1.40288e-13	-0.0420718	0	-0.0408528	-6.23504e-14	-0.0465103	-9.35257e-14	-0.0488233	6.23504e-14	-0.0535743	-3.11752e-14	-0.0559186	-7.79381e-14	-0.0450412	1.55876e-14	-0.0492609	-6.23504e-14	-0.0581691	3.11752e-14
0.0573	-0.0439472	-9.35257e-14	-0.0421968	-1.71464e-13	-0.040634	-7.79381e-14	-0.046479	-1.55876e-13	-0.0487295	-6.23504e-14	-0.0534493	-1.55876e-14	-0.0557623	-1.55876e-14	-0.0449787	-1.24701e-13	-0.0492296	-6.23504e-14	-0.0581691	-1.55876e-14
0.0574	-0.0441035	-4.67628e-14	-0.041853	-7.79381e-14	-0.040884	-6.23504e-14	-0.0465728	-9.35257e-14	-0.0486357	-1.24701e-13	-0.0534493	-1.24701e-13	-0.0558248	-7.79381e-14	-0.0449474	-1.71464e-13	-0.0491671	-6.23504e-14	-0.0580128	-1.40288e-13
0.0575	-0.0440722	-1.55876e-14	-0.0418842	-1.55876e-13	-0.040759	-3.11752e-14	-0.0465728	0	-0.048667	-1.40288e-13	-0.0535118	-1.40288e-13	-0.0558873	-7.79381e-14	-0.0450412	-1.55876e-14	-0.0492609	-9.35257e-14	-0.0580441	-9.35257e-14
0.0576	-0.0440722	-6.23504e-14	-0.0420093	-1.55876e-14	-0.040759	-1.24701e-13	-0.046604	-9.35257e-14	-0.0487295	-7.79381e-14	-0.0535743	-7.79381e-14	-0.0557936	-9.35257e-14	-0.0449787	-3.11752e-14	-0.0492609	-3.11752e-14	-0.0580753	-9.35257e-14
0.0577	-0.0440097	-7.79381e-14	-0.042103	-7.79381e-14	-0.0407277	-1.09113e-13	-0.0465103	-1.40288e-13	-0.0485107	-4.67628e-14	-0.0535743	-3.11752e-14	-0.0560749	-4.67628e-14	-0.0450724	-3.11752e-14	-0.0492609	-4.67628e-14	-0.0581378	-6.23504e-14
0.0578	-0.0442285	0	-0.0422593	-7.79381e-14	-0.040884	-7.79381e-14	-0.046354	-6.23504e-14	-0.048667	-1.40288e-13	-0.0534493	-9.35257e-14	-0.0560124	1.55876e-14	-0.0449474	-4.67628e-14	-0.0491671	-6.23504e-14	-0.057919	1.55876e-14
0.0579	-0.0441347	-3.11752e-14	-0.042103	0	-0.0409153	4.67628e-14	-0.0465415	-7.79381e-14	-0.0486357	-3.11752e-14	-0.0535431	-1.40288e-13	-0.0559498	-1.40288e-13	-0.0448536	-1.55876e-13	-0.0492296	-1.24701e-13	-0.0580441	-1.24701e-13
0.058	-0.0442598	-6.23504e-14	-0.0420093	-2.02639e-13	-0.040759	-1.40288e-13	-0.0464165	-6.23504e-14	-0.0484169	-9.35257e-14	-0.0535743	-7.79381e-14	-0.0558873	-1.09113e-13	-0.0449162	-9.35257e-14	-0.0491358	-7.79381e-14	-0.0581691	1.55876e-14
0.0581	-0.0443848	-6.23504e-14	-0.0421656	-9.35257e-14	-0.0407277	-1.55876e-13	-0.0463227	-1.40288e-13	-0.0486045	-6.23504e-14	-0.0536056	-4.67628e-14	-0.0560436	-6.23504e-14	-0.0449162	-7.79381e-14	-0.0492609	-6.23504e-14	-0.0582003	-1.55876e-14
0.0582	-0.044291	-4.67628e-14	-0.042103	1.55876e-14	-0.0405715	-6.23504e-14	-0.0463852	-1.24701e-13	-0.0485732	-3.11752e-14	-0.0535431	-9.35257e-14	-0.0558873	-7.79381e-14	-0.0450412	-3.11752e-14	-0.0491671	-3.11752e-14	-0.0580753	-4.67628e-14
0.0583	-0.044291	-6.23504e-14	-0.0422593	-4.67628e-14	-0.041009	0	-0.0463227	0	-0.0483857	-3.11752e-14	-0.0536681	-1.24701e-13	-0.0559811	-1.09113e-13	-0.0449787	-9.35257e-14	-0.0491046	-7.79381e-14	-0.0579503	-1.24701e-13
0.0584	-0.044166	-6.23504e-14	-0.0421968	-9.35257e-14	-0.0407903	0	-0.0463227	-6.23504e-14	-0.0486045	-9.35257e-14	-0.0536056	-6.23504e-14	-0.0560124	-6.23504e-14	-0.0449787	-1.09113e-13	-0.0491358	-7.79381e-14	-0.057919	-1.55876e-13
0.0585	-0.0443848	-1.09113e-13	-0.0420405	-9.35257e-14	-0.040759	-1.40288e-13	-0.0462915	-9.35257e-14	-0.048667	0	-0.0534493	-1.24701e-13	-0.0559498	-4.67628e-14	-0.0450099	-1.40288e-13	-0.0491046	-3.11752e-14	-0.0580128	-6.23504e-14
0.0586	-0.0444161	0	-0.0420405	-1.09113e-13	-0.040884	-1.09113e-13	-0.0463227	-7.79381e-14	-0.0486357	0	-0.0536368	-1.24701e-13	-0.0559498	-1.09113e-13	-0.0447599	-1.24701e-13	-0.0492609	-7.79381e-14	-0.057919	-4.67628e-14
0.0587	-0.0444786	-9.35257e-14	-0.0420093	-7.79381e-14	-0.040884	-4.67628e-14	-0.0465728	-7.79381e-14	-0.0487608	-1.09113e-13	-0.0533555	-3.11752e-14	-0.0559498	-1.24701e-13	-0.0448536	-9.35257e-14	-0.0491984	0	-0.0577002	-1.24701e-13
0.0588	-0.0444786	-1.40288e-13	-0.0421343	-9.35257e-14	-0.040759	-9.35257e-14	-0.0464477	-9.35257e-14	-0.0485732	-7.79381e-14	-0.0535118	-1.87051e-13	-0.0557936	-9.35257e-14	-0.0447911	-9.35257e-14	-0.0492609	-1.09113e-13	-0.057919	-1.24701e-13
0.0589	-0.0443535	-7.79381e-14	-0.0421343	1.55876e-14	-0.040634	-1.09113e-13	-0.0464477	-6.23504e-14	-0.048542	-1.09113e-13	-0.053418	3.11752e-14	-0.0557936	-1.24701e-13	-0.0448536	-3.11752e-14	-0.0492921	-6.23504e-14	-0.0578565	3.11752e-14
0.059	-0.0444473	-9.35257e-14	-0.0420718	-4.67628e-14	-0.0407277	-9.35257e-14	-0.0462915	-7.79381e-14	-0.0486982	-9.35257e-14	-0.0535743	-6.23504e-14	-0.0557623	-9.35257e-14	-0.0448224	-4.67628e-14	-0.0492296	0	-0.0578565	1.55876e-14
0.0591	-0.0443848	-7.79381e-14	-0.0420405	-9.35257e-14	-0.0407903	-4.67628e-14	-0.0463227	-1.71464e-13	-0.048667	-3.11752e-14	-0.0535118	-7.79381e-14	-0.0559498	-3.11752e-14	-0.0446348	-1.40288e-13	-0.0492296	-9.35257e-14	-0.0578878	-6.23504e-14
0.0592	-0.0445411	-1.24701e-13	-0.0418842	-7.79381e-14	-0.0407903	0	-0.0464477	-9.35257e-14	-0.0486982	-7.79381e-14	-0.0535431	0	-0.0559186	-6.23504e-14	-0.0446036	-1.55876e-13	-0.0491358	-1.24701e-13	-0.0577315	-7.79381e-14
0.0593	-0.0444473	-6.23504e-14	-0.0418217	-9.35257e-14	-0.0408528	-6.23504e-14	-0.0464477	-4.67628e-14	-0.0488858	-6.23504e-14	-0.0534493	-1.09113e-13	-0.0559498	-7.79381e-14	-0.0446974	3.11752e-14	-0.0491046	-1.09113e-13	-0.0577315	-1.40288e-13
0.0594	-0.0444473	-4.67628e-14	-0.0419468	-4.67628e-14	-0.0406965	-9.35257e-14	-0.046229	-3.11752e-14	-0.048667	-6.23504e-14	-0.0533868	-1.40288e-13	-0.0557936	-9.35257e-14	-0.0447911	0	-0.0490421	-6.23504e-14	-0.057794	-7.79381e-14
0.0595	-0.0443848	-6.23504e-14	-0.0420405	-1.55876e-14	-0.0407277	-1.09113e-13	-0.0462602	-2.18227e-13	-0.0487608	-1.09113e-13	-0.0533868	-7.79381e-14	-0.0558248	-1.24701e-13	-0.0445098	-1.40288e-13	-0.0491671	-1.55876e-14	-0.057669	-4.67628e-14
0.0596	-0.044166	-1.24701e-13	-0.0419155	-6.23504e-14	-0.0408215	-1.09113e-13	-0.0461977	-1.40288e-13	-0.048667	-1.09113e-13	-0.0534493	-7.79381e-14	-0.0557936	-3.11752e-14	-0.0446974	-1.40288e-13	-0.0492609	-3.11752e-14	-0.0576065	-1.24701e-13
0.0597	-0.0442598	-1.24701e-13	-0.0420093	-1.40288e-13	-0.040884	3.11752e-14	-0.0462915	-1.24701e-13	-0.0484794	-6.23504e-14	-0.0533555	-1.09113e-13	-0.0558248	-9.35257e-14	-0.0447911	4.67628e-14	-0.0493234	-3.11752e-14	-0.057794	-4.67628e-14
0.0598	-0.0443848	-1.09113e-13	-0.0419155	-3.11752e-14	-0.0407903	-4.67628e-14	-0.0461352	1.55876e-14	-0.0486357	-1.87051e-13	-0.0534806	-1.09113e-13	-0.0559186	-9.35257e-14	-0.0445098	-7.79381e-14	-0.0494797	-3.11752e-14	-0.0579503	0
0.0599	-0.0441973	-6.23504e-14	-0.042103	-7.79381e-14	-0.0407277	-1.09113e-13	-0.0462915	-1.09113e-13	-0.048667	-3.11752e-14	-0.0536993	3.11752e-14	-0.0557936	-6.23504e-14	-0.0444786	-1.55876e-13	-0.0493234	-6.23504e-14	-0.0580753	9.35257e-14
0.06	-0.0442598	-1.09113e-13	-0.042103	-6.23504e-14	-0.0407277	-1.24701e-13	-0.046354	3.11752e-14	-0.0485732	-4.67628e-14	-0.0533868	1.55876e-14	-0.0556373	-1.24701e-13	-0.0446036	1.55876e-14	-0.0490733	-1.71464e-13	-0.0578253	3.11752e-14
0.0601	-0.0441973	-4.67628e-14	-0.0421656	-6.23504e-14	-0.0406652	-7.79381e-14	-0.0462915	-4.67628e-14	-0.0487295	-1.09113e-13	-0.0533555	-2.18227e-13	-0.0557936	-1.24701e-13	-0.0446348	-7.79381e-14	-0.0491358	-1.24701e-13	-0.0578878	-1.87051e-13
0.0602	-0.0441973	-9.35257e-14	-0.0420405	-1.09113e-13	-0.040759	-6.23504e-14	-0.0462602	-6.23504e-14	-0.0487295	-1.55876e-14	-0.053418	-1.24701e-13	-0.0558561	1.55876e-14	-0.0446348	-3.11752e-14	-0.0492609	-6.23504e-14	-0.057919	-7.79381e-14
0.0603	-0.0441347	-1.09113e-13	-0.0419468	-1.55876e-13	-0.0408528	-3.11752e-14	-0.0463227	-1.55876e-13	-0.048667	-1.24701e-13	-0.0533555	-4.67628e-14	-0.0558873	-4.67628e-14	-0.0444161	-9.35257e-14	-0.0492296	-7.79381e-14	-0.0577002	-1.09113e-13
0.0604	-0.044166	-7.79381e-14	-0.0419155	-9.35257e-14	-0.0407277	-4.67628e-14	-0.0461977	-7.79381e-14	-0.0486045	-1.09113e-13	-0.0534493	-6.23504e-14	-0.0558873	-1.55876e-14	-0.0444473	-6.23504e-14	-0.0493859	3.11752e-14	-0.0579503	-9.35257e-14
0.0605	-0.044041	-9.35257e-14	-0.0418217	-9.35257e-14	-0.0406965	-1.24701e-13	-0.0461664	-1.09113e-13	-0.048542	-4.67628e-14	-0.0533868	-6.23504e-14	-0.0559186	-9.35257e-14	-0.0443223	-9.35257e-14	-0.0494484	-3.11752e-14	-0.057669	-6.23504e-14
0.0606	-0.044291	-1.24701e-13	-0.0420405	-7.79381e-14	-0.0404464	-9.35257e-14	-0.0461352	-7.79381e-14	-0.0488858	-6.23504e-14	-0.0534493	-9.35257e-14	-0.0557623	-9.35257e-14	-0.0444161	-1.09113e-13	-0.0492609	1.55876e-14	-0.0577002	-1.24701e-13
0.0607	-0.0441347	3.11752e-14	-0.0420718	6.23504e-14	-0.0406652	-1.71464e-13	-0.046229	-7.79381e-14	-0.0486982	1.55876e-14	-0.0535431	-1.55876e-14	-0.0556998	-1.55876e-13	-0.0446661	1.55876e-14	-0.0492921	-2.18227e-13	-0.0577627	-6.23504e-14
0.0608	-0.0442598	-1.09113e-13	-0.0420405	0	-0.0405089	-7.79381e-14	-0.0462915	-3.11752e-14	-0.0487295	-7.79381e-14	-0.0532305	-1.40288e-13	-0.0558248	-9.35257e-14	-0.0446348	-4.67628e-14	-0.0492609	-1.09113e-13	-0.0578565	0
0.0609	-0.0441035	-7.79381e-14	-0.042103	-7.79381e-14	-0.0405402	-1.09113e-13	-0.046229	0	-0.048667	-1.09113e-13	-0.0532305	-1.71464e-13	-0.055731	4.67628e-14	-0.0444786	-9.35257e-14	-0.0495109	0	-0.0577627	-1.09113e-13
0.061	-0.0441973	-4.67628e-14	-0.042103	-4.67628e-14	-0.0405715	-7.79381e-14	-0.0462915	-6.23504e-14	-0.0487608	-7.79381e-14	-0.0533868	-4.67628e-14	-0.0558248	-6.23504e-14	-0.0443535	-6.23504e-14	-0.0491671	-4.67628e-14	-0.057794	-9.35257e-14
0.0611	-0.0443848	-3.11752e-14	-0.0420405	-9.35257e-14	-0.0405715	-1.55876e-14	-0.0463227	-6.23504e-14	-0.0485732	0	-0.0531367	1.55876e-14	-0.0558561	-3.11752e-14	-0.0444786	-1.40288e-13	-0.0492921	-2.02639e-13	-0.0577002	-7.79381e-14
0.0612	-0.0443535	-4.67628e-14	-0.0419468	-1.55876e-13	-0.0404464	-9.35257e-14	-0.0463227	-4.67628e-14	-0.0484794	-1.71464e-13	-0.0531055	-1.40288e-13	-0.0558561	-1.09113e-13	-0.0444161	-1.09113e-13	-0.0493234	-3.11752e-14	-0.057919	-1.55876e-14
0.0613	-0.0443535	-1.24701e-13	-0.0418842	-1.55876e-13	-0.0406027	-1.09113e-13	-0.0461977	-1.40288e-13	-0.0485107	-1.09113e-13	-0.0530742	-1.55876e-13	-0.0560124	-1.09113e-13	-0.0444161	-4.67628e-14	-0.0492296	-7.79381e-14	-0.0577002	-4.67628e-14
0.0614	-0.0444786	-1.55876e-13	-0.0419468	-6.23504e-14	-0.0405715	-1.55876e-14	-0.0462915	-1.40288e-13	-0.048542	-1.55876e-14	-0.0530117	-4.67628e-14	-0.0558561	-4.67628e-14	-0.0444786	-1.09113e-13	-0.0491046	-1.24701e-13	-0.057919	-9.35257e-14
0.0615	-0.0444161	0	-0.042103	3.11752e-14	-0.0406652	-1.09113e-13	-0.0461039	-3.11752e-14	-0.0484794	0	-0.053168	0	-0.0558561	-7.79381e-14	-0.0446036	-6.23504e-14	-0.0492296	-6.23504e-14	-0.0578878	-3.11752e-14
0.0616	-0.0441973	-9.35257e-14	-0.0420405	1.55876e-14	-0.040634	-4.67628e-14	-0.0463227	-9.35257e-14	-0.0484482	-1.55876e-13	-0.0533555	1.55876e-14	-0.0559186	-7.79381e-14	-0.0444473	-4.67628e-14	-0.0491984	1.55876e-14	-0.0578565	-1.24701e-13
0.0617	-0.044291	-2.02639e-13	-0.0420405	-1.09113e-13	-0.0405715	-1.09113e-13	-0.0461352	0	-0.0484794	-4.67628e-14	-0.0533868	3.11752e-14	-0.0559811	-6.23504e-14	-0.0444473	-1.09113e-13	-0.0492296	-6.23504e-14	-0.0576065	-1.09113e-13
0.0618	-0.0442285	-6.23504e-14	-0.0419155	-1.40288e-13	-0.0405402	-7.79381e-14	-0.046229	-9.35257e-14	-0.0486982	-3.11752e-14	-0.0533243	-3.11752e-14	-0.0561061	-6.23504e-14	-0.0443848	-2.02639e-13	-0.0492921	-7.79381e-14	-0.0577315	-1.40288e-13
0.0619	-0.0441973	-7.79381e-14	-0.0420093	-6.23504e-14	-0.0406652	-6.23504e-14	-0.046229	-9.35257e-14	-0.0486045	-3.11752e-14	-0.0533868	-1.24701e-13	-0.0559186	-4.67628e-14	-0.0444161	-9.35257e-14	-0.0492296	-1.55876e-14	-0.0578565	0
0.062	-0.0441347	-3.11752e-14	-0.0419468	-3.11752e-14	-0.0405715	-6.23504e-14	-0.0461977	-9.35257e-14	-0.0486357	-1.09113e-13	-0.0531992	-6.23504e-14	-0.0558873	-1.87051e-13	-0.0443848	-3.11752e-14	-0.0491358	-9.35257e-14	-0.0578253	-1.55876e-14
0.0621	-0.0444161	-9.35257e-14	-0.0419155	-1.40288e-13	-0.0406027	-1.24701e-13	-0.0462602	-1.24701e-13	-0.048667	-7.79381e-14	-0.053293	-1.09113e-13	-0.0559811	-1.40288e-13	-0.0443535	-1.40288e-13	-0.0489483	-9.35257e-14	-0.0578253	-1.09113e-13
0.0622	-0.0441973	6.23504e-14	-0.0420405	-6.23504e-14	-0.0406027	-1.24701e-13	-0.0461352	0	-0.0485732	-3.11752e-14	-0.053293	-6.23504e-14	-0.0560436	0	-0.0444161	-4.67628e-14	-0.0491358	-1.40288e-13	-0.057919	-7.79381e-14
0.0623	-0.044291	-7.79381e-14	-0.0420093	-3.11752e-14	-0.0406652	-7.79381e-14	-0.0461977	-6.23504e-14	-0.0486045	-9.35257e-14	-0.0534806	-1.55876e-14	-0.0560124	-3.11752e-14	-0.0445098	-9.35257e-14	-0.0491671	-3.11752e-14	-0.057919	-4.67628e-14
0.0624	-0.0443848	-1.09113e-13	-0.042103	-1.09113e-13	-0.0406965	1.55876e-14	-0.0462602	-3.11752e-14	-0.0484482	-1.24701e-13	-0.0535118	0	-0.0562937	0	-0.0443848	-1.09113e-13	-0.0490421	-4.67628e-14	-0.057794	-1.09113e-13
0.0625	-0.044291	-6.23504e-14	-0.042103	-3.11752e-14	-0.0404152	-1.09113e-13	-0.0461039	1.55876e-14	-0.048542	-9.35257e-14	-0.0532618	-1.40288e-13	-0.0562312	1.55876e-14	-0.0443848	-7.79381e-14	-0.0490733	-7.79381e-14	-0.057794	-1.40288e-13
0.0626	-0.0443848	-7.79381e-14	-0.0422281	-6.23504e-14	-0.0404777	-1.55876e-13	-0.046229	-1.24701e-13	-0.0484794	-9.35257e-14	-0.0531992	-1.40288e-13	-0.0561686	-1.09113e-13	-0.0446036	-6.23504e-14	-0.0491046	-7.79381e-14	-0.0577315	-1.55876e-13
0.0627	-0.0442598	-4.67628e-14	-0.0422906	-4.67628e-14	-0.0404464	-1.09113e-13	-0.0461977	-1.55876e-14	-0.0485732	-4.67628e-14	-0.0532618	-6.23504e-14	-0.0561999	-7.79381e-14	-0.0445098	-7.79381e-14	-0.0490733	-9.35257e-14	-0.0577315	-3.11752e-14
0.0628	-0.0442598	-1.55876e-13	-0.0422906	-7.79381e-14	-0.0404152	-4.67628e-14	-0.0463227	-1.55876e-14	-0.048667	-6.23504e-14	-0.0532618	0	-0.0560436	-1.24701e-13	-0.0445723	-6.23504e-14	-0.0492296	-6.23504e-14	-0.057794	-1.24701e-13
0.0629	-0.0443535	-4.67628e-14	-0.0421968	-9.35257e-14	-0.0404152	-4.67628e-14	-0.0462602	-1.55876e-14	-0.0486045	-4.67628e-14	-0.0532618	-4.67628e-14	-0.0558873	-2.49402e-13	-0.0445098	-1.09113e-13	-0.0490733	0	-0.0577315	-9.35257e-14
0.063	-0.0442285	-6.23504e-14	-0.0420093	-1.55876e-13	-0.0406652	1.55876e-14	-0.0463227	-1.24701e-13	-0.0487608	-4.67628e-14	-0.0533868	-6.23504e-14	-0.0559186	-1.55876e-13	-0.0445098	-4.67628e-14	-0.0491358	-1.40288e-13	-0.0577627	-7.79381e-14
0.0631	-0.0442285	-1.24701e-13	-0.0420405	-1.55876e-13	-0.040884	1.55876e-14	-0.0461352	-9.35257e-14	-0.0486982	-3.11752e-14	-0.053293	-6.23504e-14	-0.0559498	-3.11752e-14	-0.0445411	-6.23504e-14	-0.0489796	-3.11752e-14	-0.0575439	-9.35257e-14
0.0632	-0.0441973	-4.67628e-14	-0.0421343	-4.67628e-14	-0.0406652	-1.55876e-14	-0.0462602	-1.71464e-13	-0.048542	-1.09113e-13	-0.0531055	-1.09113e-13	-0.0559498	-7.79381e-14	-0.0446661	-1.09113e-13	-0.0491984	-4.67628e-14	-0.0577002	-1.09113e-13
0.0633	-0.0440722	-4.67628e-14	-0.0420405	-3.11752e-14	-0.040759	-1.40288e-13	-0.0464477	3.11752e-14	-0.0484169	-1.40288e-13	-0.0535118	0	-0.0559811	-6.23504e-14	-0.0446036	0	-0.0490733	-6.23504e-14	-0.0576065	-3.11752e-14
0.0634	-0.0441347	-1.09113e-13	-0.0419155	-1.09113e-13	-0.0406965	-1.24701e-13	-0.0464477	-1.55876e-14	-0.048542	-1.55876e-13	-0.0534806	1.55876e-14	-0.0561686	-6.23504e-14	-0.0444473	-1.40288e-13	-0.0489483	-1.55876e-13	-0.0575752	-4.67628e-14
0.0635	-0.0441973	-4.67628e-14	-0.0422906	-1.09113e-13	-0.0406027	-9.35257e-14	-0.0463852	-7.79381e-14	-0.0486982	1.55876e-14	-0.0531992	-1.24701e-13	-0.0560124	-1.55876e-14	-0.0446661	-1.24701e-13	-0.0488233	-9.35257e-14	-0.0576065	-1.24701e-13
0.0636	-0.0441973	-7.79381e-14	-0.0422281	7.79381e-14	-0.0407277	-1.09113e-13	-0.0461977	-1.09113e-13	-0.0484482	0	-0.0533555	-1.40288e-13	-0.0559811	-1.24701e-13	-0.0446348	1.55876e-14	-0.0491984	-1.55876e-13	-0.0576377	-1.09113e-13
0.0637	-0.0441973	-7.79381e-14	-0.0422906	-4.67628e-14	-0.040759	-6.23504e-14	-0.0462602	-1.71464e-13	-0.0486357	-1.24701e-13	-0.0533555	-3.11752e-14	-0.0556998	-1.09113e-13	-0.0446036	-9.35257e-14	-0.048917	0	-0.057669	-7.79381e-14
0.0638	-0.0441973	-7.79381e-14	-0.0423844	-6.23504e-14	-0.0406652	-7.79381e-14	-0.0463852	-9.35257e-14	-0.0485732	0	-0.0534806	-7.79381e-14	-0.0558248	-1.40288e-13	-0.0444473	-1.24701e-13	-0.0490108	-1.09113e-13	-0.0575439	-4.67628e-14
0.0639	-0.044041	-1.24701e-13	-0.0422593	-9.35257e-14	-0.0408528	-9.35257e-14	-0.0463227	0	-0.0486357	-6.23504e-14	-0.0531992	0	-0.0558561	-6.23504e-14	-0.0446348	-1.09113e-13	-0.0489796	-6.23504e-14	-0.0573251	-1.24701e-13
0.064	-0.0439785	-1.40288e-13	-0.0421656	-1.40288e-13	-0.040759	-1.55876e-14	-0.0463227	-4.67628e-14	-0.0486357	0	-0.0531367	-1.55876e-13	-0.0556998	-3.11752e-14	-0.0446661	1.55876e-14	-0.0489483	-3.11752e-14	-0.0573877	-1.40288e-13
0.0641	-0.0441973	-4.67628e-14	-0.0422906	-1.24701e-13	-0.0407903	-7.79381e-14	-0.0464165	-9.35257e-14	-0.0487608	-4.67628e-14	-0.0532618	-1.71464e-13	-0.0560124	-4.67628e-14	-0.0445411	-1.24701e-13	-0.0489483	-6.23504e-14	-0.0575752	3.11752e-14
0.0642	-0.0441035	1.55876e-14	-0.0423218	-6.23504e-14	-0.040759	-1.24701e-13	-0.0461664	-7.79381e-14	-0.0487295	-7.79381e-14	-0.0535118	-4.67628e-14	-0.0559498	3.11752e-14	-0.0447286	-1.40288e-13	-0.0489483	-7.79381e-14	-0.0573877	-1.55876e-14
0.0643	-0.044041	-6.23504e-14	-0.0422281	-4.67628e-14	-0.0406965	-6.23504e-14	-0.0462602	-1.55876e-13	-0.0485732	-6.23504e-14	-0.053418	-3.11752e-14	-0.0559186	0	-0.0447599	1.55876e-14	-0.0489483	-4.67628e-14	-0.0572939	-1.09113e-13
0.0644	-0.0439472	-1.24701e-13	-0.0421968	1.55876e-14	-0.0406027	-9.35257e-14	-0.0462915	-1.55876e-14	-0.048667	-1.09113e-13	-0.0531992	-9.35257e-14	-0.0560436	-7.79381e-14	-0.0447911	0	-0.0488858	-1.09113e-13	-0.0575127	-1.09113e-13
0.0645	-0.044166	-1.09113e-13	-0.0421343	-9.35257e-14	-0.040634	-1.09113e-13	-0.0464165	1.55876e-14	-0.0485732	-9.35257e-14	-0.053168	-1.40288e-13	-0.0560436	-9.35257e-14	-0.0444161	-9.35257e-14	-0.048917	-9.35257e-14	-0.0576377	3.11752e-14
0.0646	-0.044041	3.11752e-14	-0.0420405	-9.35257e-14	-0.040634	-1.09113e-13	-0.0464477	0	-0.0486357	0	-0.0535431	-1.09113e-13	-0.0561686	-3.11752e-14	-0.0445411	-1.71464e-13	-0.0489483	0	-0.057669	-1.55876e-14
0.0647	-0.0439159	-6.23504e-14	-0.0421343	-1.09113e-13	-0.0406027	-9.35257e-14	-0.0464165	-6.23504e-14	-0.0486982	-6.23504e-14	-0.0533868	3.11752e-14	-0.0560749	-6.23504e-14	-0.0445098	-6.23504e-14	-0.0491046	1.55876e-14	-0.0576377	-1.09113e-13
0.0648	-0.0442285	-1.40288e-13	-0.0421968	-4.67628e-14	-0.0407277	-1.24701e-13	-0.0461977	-7.79381e-14	-0.048667	1.55876e-14	-0.053293	-4.67628e-14	-0.0558248	-1.55876e-13	-0.0446036	0	-0.0489796	-1.40288e-13	-0.0576377	-9.35257e-14
0.0649	-0.0441347	3.11752e-14	-0.0421968	0	-0.040634	-9.35257e-14	-0.0462915	-1.87051e-13	-0.0486357	-1.24701e-13	-0.0533243	-1.71464e-13	-0.0560124	-1.71464e-13	-0.0446348	-9.35257e-14	-0.0490733	-1.24701e-13	-0.0576065	-1.09113e-13
0.065	-0.0442598	-4.67628e-14	-0.0420718	-1.24701e-13	-0.0406652	-6.23504e-14	-0.0463227	0	-0.0487608	-9.35257e-14	-0.053293	-1.55876e-13	-0.0559186	0	-0.0446036	-9.35257e-14	-0.0490108	-1.40288e-13	-0.0573877	-6.23504e-14
0.0651	-0.044166	-1.09113e-13	-0.0420718	-1.24701e-13	-0.0404464	-9.35257e-14	-0.0463227	0	-0.0489483	4.67628e-14	-0.0533555	-9.35257e-14	-0.0559811	-7.79381e-14	-0.0447286	-3.11752e-14	-0.048917	-1.09113e-13	-0.0573564	-1.40288e-13
0.0652	-0.0441347	-1.24701e-13	-0.0418842	-9.35257e-14	-0.040634	-1.55876e-13	-0.0462915	-1.24701e-13	-0.0487295	-4.67628e-14	-0.0532305	-7.79381e-14	-0.0559498	-1.09113e-13	-0.0447599	0	-0.0491046	-9.35257e-14	-0.0575127	-1.09113e-13
0.0653	-0.044291	-3.11752e-14	-0.0417905	-1.09113e-13	-0.0404777	-7.79381e-14	-0.0461352	-9.35257e-14	-0.0487608	-2.02639e-13	-0.0535431	-3.11752e-14	-0.0560124	-9.35257e-14	-0.0446348	-1.55876e-13	-0.0491358	-3.11752e-14	-0.0575439	-4.67628e-14
0.0654	-0.044166	-6.23504e-14	-0.0419155	-6.23504e-14	-0.0405402	-9.35257e-14	-0.0461664	-1.40288e-13	-0.048667	-3.11752e-14	-0.0533243	1.55876e-14	-0.0559811	0	-0.0447911	-1.24701e-13	-0.0492296	-6.23504e-14	-0.057669	-4.67628e-14
0.0655	-0.0440722	-7.79381e-14	-0.0421343	3.11752e-14	-0.0406027	-3.11752e-14	-0.046354	-3.11752e-14	-0.0487295	-9.35257e-14	-0.0534493	-1.55876e-13	-0.0561061	-7.79381e-14	-0.0449162	3.11752e-14	-0.0490733	-3.11752e-14	-0.0577002	3.11752e-14
0.0656	-0.044166	-9.35257e-14	-0.0420405	3.11752e-14	-0.040634	-4.67628e-14	-0.0460727	-7.79381e-14	-0.048542	-1.55876e-13	-0.0534493	-6.23504e-14	-0.0559498	-9.35257e-14	-0.0448224	-6.23504e-14	-0.0490108	-7.79381e-14	-0.057794	-9.35257e-14
0.0657	-0.0441347	-1.40288e-13	-0.0420718	-9.35257e-14	-0.040634	-6.23504e-14	-0.0462915	-7.79381e-14	-0.0485732	-7.79381e-14	-0.0536368	1.55876e-14	-0.0560436	-1.09113e-13	-0.0446974	-9.35257e-14	-0.0490421	-1.24701e-13	-0.0575752	-1.24701e-13
0.0658	-0.0440722	-1.24701e-13	-0.042103	-6.23504e-14	-0.0408215	-6.23504e-14	-0.046229	-3.11752e-14	-0.048542	-1.09113e-13	-0.0535431	-3.11752e-14	-0.0558561	-7.79381e-14	-0.0447911	-1.40288e-13	-0.0492609	-1.24701e-13	-0.0575752	-9.35257e-14
0.0659	-0.0441347	-7.79381e-14	-0.0421968	-6.23504e-14	-0.0406027	-6.23504e-14	-0.046229	-7.79381e-14	-0.0484794	-7.79381e-14	-0.0535118	-7.79381e-14	-0.0560749	-1.09113e-13	-0.0449474	-9.35257e-14	-0.0492296	3.11752e-14	-0.057669	-1.24701e-13
0.066	-0.0440722	-6.23504e-14	-0.0421343	-4.67628e-14	-0.0407277	-1.24701e-13	-0.0462602	-4.67628e-14	-0.0486357	-3.11752e-14	-0.0533868	-1.09113e-13	-0.0561061	-3.11752e-14	-0.0448536	0	-0.0492609	-9.35257e-14	-0.057794	0
0.0661	-0.044041	-1.09113e-13	-0.0421343	-1.09113e-13	-0.0407277	-3.11752e-14	-0.0462915	-9.35257e-14	-0.0486045	-1.55876e-14	-0.0534806	-7.79381e-14	-0.0561374	-1.55876e-14	-0.0448536	-7.79381e-14	-0.0491358	-7.79381e-14	-0.0577627	-1.09113e-13
0.0662	-0.0439472	-6.23504e-14	-0.0421656	-6.23504e-14	-0.0406965	-9.35257e-14	-0.0463227	-7.79381e-14	-0.0485732	-7.79381e-14	-0.0533243	-3.11752e-14	-0.0559498	-9.35257e-14	-0.0447599	-1.09113e-13	-0.0491984	-9.35257e-14	-0.0575439	-1.55876e-13
0.0663	-0.0441035	-1.09113e-13	-0.0420718	-9.35257e-14	-0.0406652	-9.35257e-14	-0.0464477	1.55876e-14	-0.048542	-1.40288e-13	-0.0534806	-1.09113e-13	-0.0557936	-2.02639e-13	-0.0447911	-4.67628e-14	-0.0493234	3.11752e-14	-0.0574502	-1.09113e-13
0.0664	-0.0441035	-1.55876e-14	-0.0420405	-6.23504e-14	-0.040759	-9.35257e-14	-0.0463852	-4.67628e-14	-0.0486982	-6.23504e-14	-0.0535743	-4.67628e-14	-0.0560124	-9.35257e-14	-0.0448849	-4.67628e-14	-0.0493234	-7.79381e-14	-0.0575439	-1.24701e-13
0.0665	-0.0440722	-3.11752e-14	-0.0421343	-3.11752e-14	-0.0407903	-3.11752e-14	-0.0462602	-7.79381e-14	-0.048667	-9.35257e-14	-0.053418	-3.11752e-14	-0.0559186	-4.67628e-14	-0.0449474	-9.35257e-14	-0.0491984	-9.35257e-14	-0.0577002	-6.23504e-14
0.0666	-0.0440722	-1.55876e-13	-0.041853	-6.23504e-14	-0.0405715	-7.79381e-14	-0.0463227	-1.09113e-13	-0.0485732	-9.35257e-14	-0.0536056	-1.24701e-13	-0.0558873	-2.02639e-13	-0.0449474	-6.23504e-14	-0.0494797	-1.09113e-13	-0.057669	-3.11752e-14
0.0667	-0.0439472	0	-0.0420405	-1.55876e-13	-0.0407903	-1.09113e-13	-0.0462915	-7.79381e-14	-0.048667	-9.35257e-14	-0.053418	3.11752e-14	-0.0559498	-1.24701e-13	-0.0447911	-3.11752e-14	-0.0494172	-3.11752e-14	-0.057919	1.55876e-14
0.0668	-0.044041	-1.40288e-13	-0.042103	1.55876e-14	-0.0408215	0	-0.0463852	-7.79381e-14	-0.048542	-4.67628e-14	-0.0533868	-1.55876e-13	-0.0558873	0	-0.0448849	-9.35257e-14	-0.0490421	-7.79381e-14	-0.0577315	-7.79381e-14
0.0669	-0.0438534	-1.09113e-13	-0.0419155	-1.24701e-13	-0.0406027	-7.79381e-14	-0.0462602	-1.55876e-14	-0.0486982	-1.24701e-13	-0.0534806	-9.35257e-14	-0.0559186	-1.55876e-14	-0.0450099	-6.23504e-14	-0.0491984	-1.71464e-13	-0.0577315	-1.09113e-13
0.067	-0.0439159	-9.35257e-14	-0.041853	-9.35257e-14	-0.0405402	-1.24701e-13	-0.0463852	-9.35257e-14	-0.0486357	-6.23504e-14	-0.0535743	-1.09113e-13	-0.0560124	-6.23504e-14	-0.0451037	-4.67628e-14	-0.0491984	0	-0.0578878	-1.55876e-14
0.0671	-0.044041	-3.11752e-14	-0.0417592	-6.23504e-14	-0.0407903	-9.35257e-14	-0.0462915	-4.67628e-14	-0.0485107	-7.79381e-14	-0.0536056	-7.79381e-14	-0.0559811	-1.40288e-13	-0.0450724	-6.23504e-14	-0.0492296	-7.79381e-14	-0.0577315	-9.35257e-14
0.0672	-0.0440097	-3.11752e-14	-0.0418217	-4.67628e-14	-0.0406652	0	-0.0461352	-9.35257e-14	-0.0485732	-1.09113e-13	-0.0535743	-4.67628e-14	-0.0559186	-6.23504e-14	-0.04526	-1.09113e-13	-0.0490421	-6.23504e-14	-0.057919	-7.79381e-14
0.0673	-0.0438222	-6.23504e-14	-0.041853	0	-0.0407277	-3.11752e-14	-0.0464165	-6.23504e-14	-0.0484482	-6.23504e-14	-0.0536056	-7.79381e-14	-0.0560436	-6.23504e-14	-0.0451662	-7.79381e-14	-0.0492609	-1.87051e-13	-0.057794	-4.67628e-14
0.0674	-0.0438222	-1.40288e-13	-0.0420405	-6.23504e-14	-0.0408215	0	-0.0465415	-3.11752e-14	-0.0485732	-1.09113e-13	-0.0536993	-7.79381e-14	-0.0558873	-1.09113e-13	-0.0451975	-6.23504e-14	-0.0491984	1.55876e-14	-0.0578253	-1.40288e-13
0.0675	-0.0439159	-1.09113e-13	-0.0421343	-1.55876e-14	-0.040884	-6.23504e-14	-0.0463852	-4.67628e-14	-0.0486982	0	-0.0538244	-7.79381e-14	-0.0560436	-9.35257e-14	-0.0451975	-1.24701e-13	-0.0492921	-3.11752e-14	-0.057794	-1.09113e-13
0.0676	-0.044041	-3.11752e-14	-0.0420405	-1.55876e-14	-0.0407903	-7.79381e-14	-0.0464477	-1.24701e-13	-0.0485107	1.55876e-14	-0.0536056	-7.79381e-14	-0.0560124	-1.09113e-13	-0.0451037	-1.09113e-13	-0.0492609	-7.79381e-14	-0.0575439	-1.40288e-13
0.0677	-0.0438222	-3.11752e-14	-0.0420718	-9.35257e-14	-0.0409465	-3.11752e-14	-0.0464477	-6.23504e-14	-0.048667	-1.40288e-13	-0.0536056	-9.35257e-14	-0.0559186	-6.23504e-14	-0.0449162	-1.55876e-13	-0.0491671	-6.23504e-14	-0.0575439	-1.09113e-13
0.0678	-0.0439472	-1.40288e-13	-0.0420718	-1.40288e-13	-0.0407277	-6.23504e-14	-0.0464165	-7.79381e-14	-0.0486045	-4.67628e-14	-0.0535431	-9.35257e-14	-0.0558561	-4.67628e-14	-0.0450412	-9.35257e-14	-0.0492296	-1.24701e-13	-0.0576377	-3.11752e-14
0.0679	-0.0438222	-1.55876e-14	-0.042103	-1.24701e-13	-0.0406652	-1.24701e-13	-0.046354	-9.35257e-14	-0.0485107	-9.35257e-14	-0.0536056	-6.23504e-14	-0.0560124	-6.23504e-14	-0.045135	-7.79381e-14	-0.0491671	-1.55876e-13	-0.057669	-4.67628e-14
0.068	-0.0441035	-9.35257e-14	-0.0418842	-6.23504e-14	-0.0407903	-6.23504e-14	-0.046479	-1.24701e-13	-0.0486045	-9.35257e-14	-0.0534493	-4.67628e-14	-0.0559498	-7.79381e-14	-0.0451975	0	-0.0491671	-7.79381e-14	-0.0576377	0
0.0681	-0.0439472	-1.55876e-14	-0.0418217	-1.24701e-13	-0.0408528	-3.11752e-14	-0.0462915	-9.35257e-14	-0.0485732	-3.11752e-14	-0.053418	-1.24701e-13	-0.0559186	-4.67628e-14	-0.045135	-6.23504e-14	-0.0492296	-6.23504e-14	-0.0576065	-6.23504e-14
0.0682	-0.0441347	-4.67628e-14	-0.041853	-9.35257e-14	-0.0408528	-3.11752e-14	-0.0465103	-1.24701e-13	-0.048667	-6.23504e-14	-0.0533868	-6.23504e-14	-0.0560124	-3.11752e-14	-0.0451037	-1.71464e-13	-0.0490421	-9.35257e-14	-0.0574502	-6.23504e-14
0.0683	-0.044041	0	-0.0418217	-9.35257e-14	-0.0408528	-1.09113e-13	-0.0463227	-4.67628e-14	-0.0486045	-1.55876e-14	-0.0535118	-9.35257e-14	-0.0560124	-9.35257e-14	-0.0452287	-9.35257e-14	-0.0489483	-1.24701e-13	-0.0574502	-1.24701e-13
0.0684	-0.0440097	-1.55876e-13	-0.0418217	-4.67628e-14	-0.0407903	-7.79381e-14	-0.0464165	-9.35257e-14	-0.0484794	-1.40288e-13	-0.0533868	-6.23504e-14	-0.0559811	0	-0.0450412	-7.79381e-14	-0.0490108	-7.79381e-14	-0.0574814	-7.79381e-14
0.0685	-0.044041	-9.35257e-14	-0.041978	0	-0.040634	-6.23504e-14	-0.046354	-9.35257e-14	-0.048542	-9.35257e-14	-0.0535743	-7.79381e-14	-0.0560124	-1.09113e-13	-0.0451975	-9.35257e-14	-0.0490421	-4.67628e-14	-0.0575752	-9.35257e-14
0.0686	-0.0440722	-4.67628e-14	-0.0419155	-3.11752e-14	-0.0409153	-7.79381e-14	-0.0463852	-1.09113e-13	-0.048542	-9.35257e-14	-0.0536681	0	-0.0560124	-1.09113e-13	-0.0451975	-6.23504e-14	-0.048917	-4.67628e-14	-0.0576377	0
0.0687	-0.0442598	-9.35257e-14	-0.0419468	-6.23504e-14	-0.0408215	1.55876e-14	-0.046354	-6.23504e-14	-0.0484794	-6.23504e-14	-0.0533868	-3.11752e-14	-0.0558873	-1.09113e-13	-0.0451037	-9.35257e-14	-0.0490421	-1.09113e-13	-0.0576065	-6.23504e-14
0.0688	-0.0441035	6.23504e-14	-0.0420093	-6.23504e-14	-0.040884	-1.09113e-13	-0.046354	-4.67628e-14	-0.0483544	-1.09113e-13	-0.0535118	-1.24701e-13	-0.0560124	-3.11752e-14	-0.0452287	-1.24701e-13	-0.0489483	-3.11752e-14	-0.0578565	3.11752e-14
0.0689	-0.0441347	-9.35257e-14	-0.0420718	-6.23504e-14	-0.0406965	-1.09113e-13	-0.046479	-1.09113e-13	-0.0483857	-1.55876e-14	-0.0535431	-1.09113e-13	-0.0559811	-3.11752e-14	-0.0453225	-4.67628e-14	-0.048917	-9.35257e-14	-0.0578253	-3.11752e-14
0.069	-0.0441035	-1.24701e-13	-0.0420718	-7.79381e-14	-0.0407903	-4.67628e-14	-0.046229	-7.79381e-14	-0.0485732	-1.55876e-14	-0.0535118	-7.79381e-14	-0.0558561	-1.09113e-13	-0.0451975	-6.23504e-14	-0.0489796	-9.35257e-14	-0.057669	-9.35257e-14
0.0691	-0.0441035	-9.35257e-14	-0.0419468	-7.79381e-14	-0.0407903	-1.24701e-13	-0.0462602	-7.79381e-14	-0.0485107	-6.23504e-14	-0.0535743	-1.09113e-13	-0.0556998	-1.09113e-13	-0.0452287	-9.35257e-14	-0.0490108	-9.35257e-14	-0.057669	-1.87051e-13
0.0692	-0.0441973	-6.23504e-14	-0.0420405	-1.40288e-13	-0.0409465	0	-0.0464477	-6.23504e-14	-0.0486357	-7.79381e-14	-0.0536368	-4.67628e-14	-0.0559186	-6.23504e-14	-0.045385	-6.23504e-14	-0.0491358	-7.79381e-14	-0.0575127	-1.09113e-13
0.0693	-0.0442598	-4.67628e-14	-0.0420718	-1.09113e-13	-0.040884	1.55876e-14	-0.0463852	0	-0.0484169	-4.67628e-14	-0.0536056	0	-0.0558248	-9.35257e-14	-0.04551	1.55876e-14	-0.0491984	3.11752e-14	-0.0576377	-6.23504e-14
0.0694	-0.0441035	-9.35257e-14	-0.0421343	0	-0.0406027	-9.35257e-14	-0.046354	-1.71464e-13	-0.0483857	-1.09113e-13	-0.0536056	-9.35257e-14	-0.0560124	-9.35257e-14	-0.0454475	0	-0.0493546	-9.35257e-14	-0.0576377	-4.67628e-14
0.0695	-0.0443535	-1.40288e-13	-0.0420405	-7.79381e-14	-0.040759	-1.24701e-13	-0.0461664	-1.55876e-13	-0.0486045	-1.09113e-13	-0.0535118	-1.24701e-13	-0.0558873	0	-0.0454163	-1.55876e-13	-0.0491984	-3.11752e-14	-0.0578565	-4.67628e-14
0.0696	-0.0442285	-3.11752e-14	-0.0420093	-1.40288e-13	-0.040634	-1.55876e-14	-0.0462915	-4.67628e-14	-0.0484482	-3.11752e-14	-0.0534806	-1.40288e-13	-0.0558873	-1.40288e-13	-0.0455413	-9.35257e-14	-0.0492609	-4.67628e-14	-0.0577627	-1.55876e-14
0.0697	-0.0440722	-7.79381e-14	-0.0420405	-1.40288e-13	-0.0407903	-7.79381e-14	-0.046354	3.11752e-14	-0.0486045	-7.79381e-14	-0.0535118	-1.09113e-13	-0.0559186	-1.09113e-13	-0.0454163	-1.09113e-13	-0.0492296	-1.09113e-13	-0.0577627	-1.09113e-13
0.0698	-0.0441973	-1.09113e-13	-0.042103	-3.11752e-14	-0.040634	-1.55876e-14	-0.0462915	-4.67628e-14	-0.0487608	-1.55876e-14	-0.0535743	-9.35257e-14	-0.0558561	-6.23504e-14	-0.0452912	-1.09113e-13	-0.0492921	-7.79381e-14	-0.0577002	-1.09113e-13
0.0699	-0.044166	-6.23504e-14	-0.0420405	-6.23504e-14	-0.0405715	-6.23504e-14	-0.0462915	-3.11752e-14	-0.048542	-3.11752e-14	-0.0534806	0	-0.0559498	-1.24701e-13	-0.0454163	-7.79381e-14	-0.0493859	-1.09113e-13	-0.057794	-1.09113e-13
0.07	-0.044041	-1.09113e-13	-0.0420093	-6.23504e-14	-0.0407903	-1.24701e-13	-0.0463852	0	-0.0484482	-1.87051e-13	-0.0534493	-1.09113e-13	-0.0557623	-3.11752e-14	-0.04551	3.11752e-14	-0.0491671	-1.55876e-14	-0.057669	-1.09113e-13
0.0701	-0.0439785	-1.09113e-13	-0.0421968	-7.79381e-14	-0.0409153	0	-0.046229	-1.55876e-13	-0.0484482	-9.35257e-14	-0.0533868	-1.55876e-13	-0.0556685	-1.40288e-13	-0.04551	-9.35257e-14	-0.0491984	-1.71464e-13	-0.0577627	-1.09113e-13
0.0702	-0.0441347	-3.11752e-14	-0.0420405	-6.23504e-14	-0.0409153	-3.11752e-14	-0.0462915	-9.35257e-14	-0.048667	-4.67628e-14	-0.0534493	-4.67628e-14	-0.0556998	-7.79381e-14	-0.0454788	-1.55876e-13	-0.0491671	-9.35257e-14	-0.0575439	-4.67628e-14
0.0703	-0.0441973	-6.23504e-14	-0.0421656	-9.35257e-14	-0.0408215	-6.23504e-14	-0.046354	-3.11752e-14	-0.0485732	-1.55876e-14	-0.0534493	-6.23504e-14	-0.0558873	1.55876e-14	-0.0456976	-4.67628e-14	-0.0491984	-9.35257e-14	-0.0577002	-3.11752e-14
0.0704	-0.0441035	-6.23504e-14	-0.0421656	-3.11752e-14	-0.0409153	-4.67628e-14	-0.0463227	-1.24701e-13	-0.048542	-7.79381e-14	-0.0535431	-6.23504e-14	-0.0556998	1.55876e-14	-0.0454475	-4.67628e-14	-0.0491984	-4.67628e-14	-0.0575127	-1.09113e-13
0.0705	-0.0440097	-6.23504e-14	-0.0422281	-4.67628e-14	-0.0407903	-1.09113e-13	-0.0462915	-7.79381e-14	-0.0486982	-1.09113e-13	-0.0536368	0	-0.0559186	-9.35257e-14	-0.04551	-9.35257e-14	-0.0493234	-6.23504e-14	-0.0575752	-1.09113e-13
0.0706	-0.0441973	-1.40288e-13	-0.042103	-1.24701e-13	-0.0407277	-1.40288e-13	-0.0463227	-9.35257e-14	-0.0486045	-3.11752e-14	-0.0535431	-7.79381e-14	-0.0560436	-4.67628e-14	-0.0456663	-9.35257e-14	-0.0492609	-4.67628e-14	-0.0577315	-9.35257e-14
0.0707	-0.0442598	-3.11752e-14	-0.0421656	-9.35257e-14	-0.0407277	-6.23504e-14	-0.046354	-6.23504e-14	-0.0486357	-4.67628e-14	-0.0536993	-1.09113e-13	-0.0558561	-1.24701e-13	-0.0456038	-3.11752e-14	-0.0490733	-6.23504e-14	-0.0577002	0
0.0708	-0.0442285	-4.67628e-14	-0.0419468	-6.23504e-14	-0.0403839	-1.40288e-13	-0.0461977	-6.23504e-14	-0.0487295	-7.79381e-14	-0.0536056	-6.23504e-14	-0.0557623	-1.71464e-13	-0.04551	-1.24701e-13	-0.0493546	-1.24701e-13	-0.057794	-6.23504e-14
0.0709	-0.0442285	-1.09113e-13	-0.041978	-1.09113e-13	-0.040759	-1.09113e-13	-0.046229	-9.35257e-14	-0.048667	-3.11752e-14	-0.0536368	-1.24701e-13	-0.0558561	-4.67628e-14	-0.0456351	-9.35257e-14	-0.0492296	-1.55876e-14	-0.0576377	-7.79381e-14
0.071	-0.0439785	-1.09113e-13	-0.041853	-9.35257e-14	-0.0408215	1.55876e-13	-0.0462602	-7.79381e-14	-0.0486045	-1.09113e-13	-0.0536681	-1.09113e-13	-0.0558873	-7.79381e-14	-0.04551	-9.35257e-14	-0.0492609	-9.35257e-14	-0.0578565	-7.79381e-14
0.0711	-0.0439785	-1.09113e-13	-0.0418842	-1.09113e-13	-0.0406965	-7.79381e-14	-0.0462602	-1.24701e-13	-0.0485732	-1.09113e-13	-0.0533555	-9.35257e-14	-0.0558561	-3.11752e-14	-0.0456663	0	-0.0492296	-1.24701e-13	-0.0577315	-4.67628e-14
0.0712	-0.0441035	-6.23504e-14	-0.0419468	-4.67628e-14	-0.040759	-9.35257e-14	-0.0462602	-4.67628e-14	-0.0487295	-6.23504e-14	-0.0533243	-1.40288e-13	-0.0560124	-3.11752e-14	-0.0458539	-3.11752e-14	-0.0492609	-7.79381e-14	-0.0576065	-1.09113e-13
0.0713	-0.0441973	-1.55876e-14	-0.0418842	-6.23504e-14	-0.0408528	-9.35257e-14	-0.0461977	-1.09113e-13	-0.0487295	0	-0.0532618	-1.40288e-13	-0.0559498	-3.11752e-14	-0.0458539	-7.79381e-14	-0.0492921	-6.23504e-14	-0.0577002	-9.35257e-14
0.0714	-0.0439785	-7.79381e-14	-0.0418842	-9.35257e-14	-0.040634	-6.23504e-14	-0.0461977	-6.23504e-14	-0.0487295	-7.79381e-14	-0.0532618	-7.79381e-14	-0.0560124	-1.09113e-13	-0.0457288	-1.09113e-13	-0.0494484	-3.11752e-14	-0.0577315	-4.67628e-14
0.0715	-0.0438847	-1.71464e-13	-0.041978	-4.67628e-14	-0.0406652	-1.09113e-13	-0.0462915	1.55876e-14	-0.0486982	-4.67628e-14	-0.0532305	-3.11752e-14	-0.0559186	-4.67628e-14	-0.0459164	-1.24701e-13	-0.0494484	-7.79381e-14	-0.0574814	-7.79381e-14
0.0716	-0.0441035	-7.79381e-14	-0.0419155	-3.11752e-14	-0.0407903	-7.79381e-14	-0.046229	-4.67628e-14	-0.0487295	-9.35257e-14	-0.0532618	-6.23504e-14	-0.0560124	-7.79381e-14	-0.0457914	-3.11752e-14	-0.0494172	-7.79381e-14	-0.0573564	-1.40288e-13
0.0717	-0.044166	-3.11752e-14	-0.0417905	-6.23504e-14	-0.0408528	-6.23504e-14	-0.0462915	-6.23504e-14	-0.048792	-1.09113e-13	-0.0531055	-1.24701e-13	-0.0558248	-1.09113e-13	-0.0455726	-1.87051e-13	-0.0493546	-3.11752e-14	-0.0575439	-1.09113e-13
0.0718	-0.044041	-1.55876e-14	-0.0420718	-4.67628e-14	-0.0406652	-6.23504e-14	-0.0464165	-1.09113e-13	-0.0487295	-4.67628e-14	-0.0532618	-1.40288e-13	-0.0558561	-7.79381e-14	-0.0455413	-1.09113e-13	-0.0493859	-1.71464e-13	-0.0575752	1.55876e-14
0.0719	-0.0439159	-1.71464e-13	-0.0421343	4.67628e-14	-0.040884	-4.67628e-14	-0.0462915	1.55876e-14	-0.0487295	-7.79381e-14	-0.053293	4.67628e-14	-0.0559498	-6.23504e-14	-0.0456663	-3.11752e-14	-0.0494172	-9.35257e-14	-0.0573877	-7.79381e-14
0.072	-0.0439159	-1.71464e-13	-0.0421343	6.23504e-14	-0.0408215	-3.11752e-14	-0.0463227	-1.40288e-13	-0.0488233	-6.23504e-14	-0.0533243	-6.23504e-14	-0.0557936	-7.79381e-14	-0.0456663	-7.79381e-14	-0.0490421	-4.67628e-14	-0.0572314	-1.09113e-13
0.0721	-0.0438847	-6.23504e-14	-0.0421343	-9.35257e-14	-0.0408215	-1.09113e-13	-0.0463227	-6.23504e-14	-0.0485107	-9.35257e-14	-0.0533868	1.55876e-14	-0.0558248	-1.40288e-13	-0.0457288	-6.23504e-14	-0.0494172	-2.18227e-13	-0.0572939	-7.79381e-14
0.0722	-0.0439159	-4.67628e-14	-0.0421343	-1.24701e-13	-0.040884	-9.35257e-14	-0.0462602	-1.09113e-13	-0.0486357	-1.55876e-13	-0.0536368	-3.11752e-14	-0.0558873	-3.11752e-14	-0.0457601	-4.67628e-14	-0.0494172	3.11752e-14	-0.0573877	-7.79381e-14
0.0723	-0.0441035	-7.79381e-14	-0.0421656	-7.79381e-14	-0.041009	-9.35257e-14	-0.046229	-9.35257e-14	-0.048667	-3.11752e-14	-0.053418	-4.67628e-14	-0.0558248	-7.79381e-14	-0.0457601	-3.11752e-14	-0.0493234	-9.35257e-14	-0.0574502	6.23504e-14
0.0724	-0.044041	-4.67628e-14	-0.0422281	-9.35257e-14	-0.0409153	-4.67628e-14	-0.0464477	-9.35257e-14	-0.0488233	-4.67628e-14	-0.0534806	-1.40288e-13	-0.0558248	-9.35257e-14	-0.0457288	-7.79381e-14	-0.0496047	-9.35257e-14	-0.0573877	-3.11752e-14
0.0725	-0.0441035	-4.67628e-14	-0.0421968	0	-0.041009	-7.79381e-14	-0.0463227	1.55876e-14	-0.0487608	-1.40288e-13	-0.0535743	-4.67628e-14	-0.0558873	-9.35257e-14	-0.0456976	-1.24701e-13	-0.0494172	3.11752e-14	-0.0573877	-1.71464e-13
0.0726	-0.0442285	-9.35257e-14	-0.0421343	-1.55876e-14	-0.0409465	-6.23504e-14	-0.0464165	-6.23504e-14	-0.0487608	-6.23504e-14	-0.0534493	-1.09113e-13	-0.0558248	0	-0.0456663	-7.79381e-14	-0.0493546	-1.09113e-13	-0.0573564	-4.67628e-14
0.0727	-0.0439159	-7.79381e-14	-0.0421656	-7.79381e-14	-0.0407277	-1.24701e-13	-0.0464165	-9.35257e-14	-0.0486045	-1.09113e-13	-0.0535431	-1.09113e-13	-0.0556685	-1.09113e-13	-0.0458539	-1.09113e-13	-0.0492921	-1.24701e-13	-0.0574189	-7.79381e-14
0.0728	-0.0439472	-1.55876e-13	-0.0422906	-4.67628e-14	-0.0409465	-6.23504e-14	-0.0462602	-1.09113e-13	-0.0487295	-7.79381e-14	-0.0535118	-3.11752e-14	-0.0557623	-1.09113e-13	-0.0456976	-3.11752e-14	-0.0492296	-7.79381e-14	-0.0573251	-7.79381e-14
0.0729	-0.0440097	-9.35257e-14	-0.0420405	-1.09113e-13	-0.0409465	-3.11752e-14	-0.0463227	-1.71464e-13	-0.0486045	-7.79381e-14	-0.0533868	-7.79381e-14	-0.0557623	0	-0.0458226	-1.40288e-13	-0.0493546	-9.35257e-14	-0.0572001	-1.09113e-13
0.073	-0.0439785	0	-0.041978	-2.02639e-13	-0.0407903	-9.35257e-14	-0.046479	0	-0.0486357	-1.40288e-13	-0.0533243	-1.40288e-13	-0.0558561	-6.23504e-14	-0.0457288	-4.67628e-14	-0.0489796	-4.67628e-14	-0.0572939	-1.09113e-13
0.0731	-0.0438534	-7.79381e-14	-0.0419155	-6.23504e-14	-0.0408528	-1.24701e-13	-0.0462602	-3.11752e-14	-0.048667	-4.67628e-14	-0.0533868	-7.79381e-14	-0.0559498	1.55876e-14	-0.0457601	-1.09113e-13	-0.0491984	-1.40288e-13	-0.0570751	-7.79381e-14
0.0732	-0.0439785	-1.24701e-13	-0.0419155	-9.35257e-14	-0.0408528	-9.35257e-14	-0.046229	-1.87051e-13	-0.0486045	-3.11752e-14	-0.0535431	1.55876e-14	-0.0558248	-7.79381e-14	-0.0458851	-6.23504e-14	-0.0492921	-1.55876e-14	-0.0572626	-4.67628e-14
0.0733	-0.0439472	-4.67628e-14	-0.042103	0	-0.040759	-6.23504e-14	-0.0462915	-1.24701e-13	-0.0485107	-9.35257e-14	-0.0535431	-7.79381e-14	-0.0557623	-1.24701e-13	-0.0457914	-4.67628e-14	-0.0492921	1.55876e-14	-0.0571689	0
0.0734	-0.0440097	-6.23504e-14	-0.0420718	1.55876e-14	-0.0407903	-9.35257e-14	-0.0464165	3.11752e-14	-0.0486357	-1.71464e-13	-0.0535118	-7.79381e-14	-0.0557623	-7.79381e-14	-0.0458226	-1.09113e-13	-0.0494172	-6.23504e-14	-0.0571376	-1.09113e-13
0.0735	-0.0440722	-1.24701e-13	-0.0422593	-6.23504e-14	-0.0408528	1.55876e-14	-0.0464165	-6.23504e-14	-0.0485107	-7.79381e-14	-0.053418	-9.35257e-14	-0.0557623	-1.09113e-13	-0.0458539	-7.79381e-14	-0.0493859	-1.09113e-13	-0.0572939	-1.09113e-13
0.0736	-0.0439472	-4.67628e-14	-0.0425094	4.67628e-14	-0.040759	-3.11752e-14	-0.0464165	-4.67628e-14	-0.048542	-4.67628e-14	-0.0534493	-9.35257e-14	-0.0556373	-7.79381e-14	-0.0459789	-1.24701e-13	-0.0493234	-7.79381e-14	-0.0571689	-3.11752e-14
0.0737	-0.0441035	1.55876e-14	-0.0421656	-6.23504e-14	-0.0408528	-1.24701e-13	-0.046479	-3.11752e-14	-0.0484482	-9.35257e-14	-0.0534493	-1.09113e-13	-0.0558873	-1.09113e-13	-0.0460102	-7.79381e-14	-0.0495734	-7.79381e-14	-0.0571064	-7.79381e-14
0.0738	-0.0440097	-7.79381e-14	-0.0424156	-1.55876e-13	-0.0407903	-9.35257e-14	-0.0463227	-1.40288e-13	-0.0486357	-4.67628e-14	-0.0535118	-6.23504e-14	-0.0557623	-1.55876e-14	-0.0459789	-9.35257e-14	-0.0495109	1.55876e-14	-0.0571064	-6.23504e-14
0.0739	-0.044166	-6.23504e-14	-0.0422281	-1.09113e-13	-0.0407903	-4.67628e-14	-0.0462602	-1.55876e-13	-0.048792	9.35257e-14	-0.0535118	-6.23504e-14	-0.0559811	-4.67628e-14	-0.0459476	-6.23504e-14	-0.0495109	-6.23504e-14	-0.0571376	-1.09113e-13
0.074	-0.0440722	0	-0.0421343	-9.35257e-14	-0.0406965	-6.23504e-14	-0.0463852	-6.23504e-14	-0.0487608	-9.35257e-14	-0.0534493	0	-0.0558561	-4.67628e-14	-0.0461039	-3.11752e-14	-0.0493859	-1.24701e-13	-0.0569501	-3.11752e-14
0.0741	-0.044166	-6.23504e-14	-0.0421656	-1.71464e-13	-0.0406652	-1.40288e-13	-0.0463227	-7.79381e-14	-0.0485732	-9.35257e-14	-0.0535118	-9.35257e-14	-0.0558248	-1.55876e-13	-0.0460414	-3.11752e-14	-0.0494484	-1.71464e-13	-0.0568563	-1.09113e-13
0.0742	-0.044166	-4.67628e-14	-0.0422906	-1.09113e-13	-0.0405715	-1.24701e-13	-0.0464165	-1.09113e-13	-0.0487295	-9.35257e-14	-0.0536681	-1.09113e-13	-0.0559498	-6.23504e-14	-0.0459476	-7.79381e-14	-0.0494484	0	-0.0569188	-1.24701e-13
0.0743	-0.0440097	-9.35257e-14	-0.0422281	-7.79381e-14	-0.040634	-4.67628e-14	-0.046229	-1.09113e-13	-0.0486045	-6.23504e-14	-0.0537619	1.55876e-14	-0.0558561	0	-0.0460102	-1.09113e-13	-0.0495734	0	-0.056825	-6.23504e-14
0.0744	-0.044041	-1.40288e-13	-0.0421656	-4.67628e-14	-0.0406965	-1.24701e-13	-0.046354	-6.23504e-14	-0.048542	-1.09113e-13	-0.0536993	-6.23504e-14	-0.0559498	-7.79381e-14	-0.0460102	-7.79381e-14	-0.0497297	-7.79381e-14	-0.0568876	-3.11752e-14
0.0745	-0.0441347	-3.11752e-14	-0.0422593	-4.67628e-14	-0.0406965	-9.35257e-14	-0.0462915	-1.09113e-13	-0.0486357	-4.67628e-14	-0.0536368	-1.55876e-13	-0.0559186	-6.23504e-14	-0.0460414	0	-0.049761	0	-0.056825	-3.11752e-14
0.0746	-0.044041	4.67628e-14	-0.042103	-1.09113e-13	-0.0406652	-3.11752e-14	-0.046354	-4.67628e-14	-0.0485107	-6.23504e-14	-0.0536056	-1.71464e-13	-0.0559498	-7.79381e-14	-0.0461664	-1.55876e-14	-0.0495734	-1.40288e-13	-0.056825	-1.55876e-14
0.0747	-0.0439472	-1.40288e-13	-0.0420718	-1.40288e-13	-0.0404464	-7.79381e-14	-0.0462915	-9.35257e-14	-0.048667	-1.40288e-13	-0.0535118	-1.09113e-13	-0.0559498	-6.23504e-14	-0.046229	-9.35257e-14	-0.0495734	-1.55876e-13	-0.0569188	0
0.0748	-0.0439472	-3.11752e-14	-0.0421343	-7.79381e-14	-0.0406027	-9.35257e-14	-0.0462602	-6.23504e-14	-0.0486357	-1.09113e-13	-0.0536368	-7.79381e-14	-0.0558561	-4.67628e-14	-0.0462602	-6.23504e-14	-0.0495109	-1.24701e-13	-0.056825	-7.79381e-14
0.0749	-0.0440722	-4.67628e-14	-0.0421343	-9.35257e-14	-0.0405715	-3.11752e-14	-0.0464165	-6.23504e-14	-0.048667	-7.79381e-14	-0.0534493	-4.67628e-14	-0.0558248	-1.09113e-13	-0.0460414	-1.40288e-13	-0.0495734	-4.67628e-14	-0.0571064	-1.55876e-14
0.075	-0.0440097	-1.09113e-13	-0.0423218	-4.67628e-14	-0.0405715	-9.35257e-14	-0.0463852	-4.67628e-14	-0.0486045	-3.11752e-14	-0.0534493	-1.09113e-13	-0.0558873	-1.55876e-14	-0.0461352	-1.55876e-13	-0.049636	0	-0.0569501	1.55876e-14
0.0751	-0.044041	-7.79381e-14	-0.0421968	0	-0.040634	-6.23504e-14	-0.046229	-7.79381e-14	-0.0484794	-6.23504e-14	-0.053418	-9.35257e-14	-0.0558561	-7.79381e-14	-0.0460727	-3.11752e-14	-0.0496985	-7.79381e-14	-0.0570751	-9.35257e-14
0.0752	-0.0440097	0	-0.042103	-1.09113e-13	-0.0406965	-7.79381e-14	-0.0461352	-1.40288e-13	-0.048542	-1.55876e-13	-0.0535118	-9.35257e-14	-0.0557623	-6.23504e-14	-0.0462602	-6.23504e-14	-0.049636	-4.67628e-14	-0.0569188	-1.09113e-13
0.0753	-0.0440722	-7.79381e-14	-0.0423218	-1.40288e-13	-0.0405089	-4.67628e-14	-0.0462602	-1.24701e-13	-0.0483857	-6.23504e-14	-0.0534493	0	-0.0557623	-9.35257e-14	-0.0461977	-7.79381e-14	-0.0493859	-7.79381e-14	-0.0570751	-1.71464e-13
0.0754	-0.0438847	-4.67628e-14	-0.0423531	-4.67628e-14	-0.0405402	-1.24701e-13	-0.0464477	-1.55876e-14	-0.0484169	-7.79381e-14	-0.0536056	-6.23504e-14	-0.0559186	-6.23504e-14	-0.0461039	-1.55876e-14	-0.0495734	-9.35257e-14	-0.0567625	-3.11752e-14
0.0755	-0.0439472	-1.40288e-13	-0.0422281	-4.67628e-14	-0.0403839	-1.09113e-13	-0.0461039	1.55876e-14	-0.0483857	-9.35257e-14	-0.0535118	-3.11752e-14	-0.0558248	0	-0.0462602	-9.35257e-14	-0.049636	-6.23504e-14	-0.0567625	-2.02639e-13
0.0756	-0.044291	-6.23504e-14	-0.0421343	-9.35257e-14	-0.0403214	-4.67628e-14	-0.0460727	-1.71464e-13	-0.0482606	-6.23504e-14	-0.0534806	-1.40288e-13	-0.0557623	-9.35257e-14	-0.0460727	-6.23504e-14	-0.0495109	-6.23504e-14	-0.0569188	-4.67628e-14
0.0757	-0.0440722	1.55876e-14	-0.0421656	-1.40288e-13	-0.0402901	-9.35257e-14	-0.0461977	-1.09113e-13	-0.0484169	-7.79381e-14	-0.0533555	-7.79381e-14	-0.0557936	-4.67628e-14	-0.0460727	-1.55876e-13	-0.0497297	-4.67628e-14	-0.056825	4.67628e-14
0.0758	-0.0442285	-9.35257e-14	-0.0421656	-9.35257e-14	-0.0404464	-4.67628e-14	-0.0463852	-3.11752e-14	-0.0483232	-6.23504e-14	-0.0535431	-7.79381e-14	-0.0558248	-9.35257e-14	-0.046229	-6.23504e-14	-0.0496672	0	-0.0569188	-6.23504e-14
0.0759	-0.0441347	-1.24701e-13	-0.042103	1.55876e-14	-0.0404777	1.55876e-14	-0.0462915	0	-0.0483544	-4.67628e-14	-0.0535431	1.55876e-14	-0.0558873	-7.79381e-14	-0.0462915	0	-0.0494172	-6.23504e-14	-0.0570438	-6.23504e-14
0.076	-0.0439159	-1.24701e-13	-0.0420718	-7.79381e-14	-0.0403527	-7.79381e-14	-0.0461039	-1.09113e-13	-0.0484169	-6.23504e-14	-0.0533243	-7.79381e-14	-0.055731	1.55876e-14	-0.0462602	0	-0.0494172	-1.71464e-13	-0.0568876	-7.79381e-14
0.0761	-0.0439472	-1.87051e-13	-0.042103	-9.35257e-14	-0.0402901	-9.35257e-14	-0.0461664	-1.87051e-13	-0.0483544	-6.23504e-14	-0.053418	-1.24701e-13	-0.0558873	-1.09113e-13	-0.046229	-7.79381e-14	-0.049636	-9.35257e-14	-0.0568876	-1.40288e-13
0.0762	-0.0441035	-1.55876e-14	-0.0421343	-6.23504e-14	-0.0403527	-4.67628e-14	-0.0461352	-9.35257e-14	-0.0483232	-7.79381e-14	-0.0536681	0	-0.0557936	1.55876e-14	-0.0461977	-7.79381e-14	-0.0495734	1.55876e-14	-0.0571064	-7.79381e-14
0.0763	-0.0438222	-9.35257e-14	-0.0421343	-4.67628e-14	-0.0404777	-9.35257e-14	-0.0461664	-4.67628e-14	-0.0482919	-3.11752e-14	-0.0535118	3.11752e-14	-0.0557623	-1.09113e-13	-0.046354	-4.67628e-14	-0.0494172	-3.11752e-14	-0.0571376	0
0.0764	-0.0437909	-1.55876e-13	-0.0421343	-7.79381e-14	-0.0403839	-3.11752e-14	-0.0461977	-4.67628e-14	-0.0484794	-1.24701e-13	-0.0534493	-7.79381e-14	-0.0557623	-1.24701e-13	-0.0464165	-6.23504e-14	-0.0495734	-7.79381e-14	-0.0571376	-6.23504e-14
0.0765	-0.0440097	1.55876e-14	-0.042103	-4.67628e-14	-0.0404464	-7.79381e-14	-0.046229	-9.35257e-14	-0.0483857	-3.11752e-14	-0.0535118	-1.71464e-13	-0.0557936	-4.67628e-14	-0.046354	-7.79381e-14	-0.0495109	-1.24701e-13	-0.0571376	-1.24701e-13
0.0766	-0.0441347	-3.11752e-14	-0.0420718	-7.79381e-14	-0.0403839	-6.23504e-14	-0.0463852	-3.11752e-14	-0.0484169	-1.40288e-13	-0.0535118	-4.67628e-14	-0.0557936	-3.11752e-14	-0.0463852	-4.67628e-14	-0.0493859	-1.24701e-13	-0.0571689	-6.23504e-14
0.0767	-0.0439472	-7.79381e-14	-0.0421343	-1.40288e-13	-0.0405402	-4.67628e-14	-0.0461977	1.55876e-14	-0.0482606	-9.35257e-14	-0.0533868	-4.67628e-14	-0.0556373	-7.79381e-14	-0.046354	-4.67628e-14	-0.0493859	-1.09113e-13	-0.0571689	0
0.0768	-0.0441347	-9.35257e-14	-0.042103	-4.67628e-14	-0.0406027	0	-0.0464165	-9.35257e-14	-0.0483544	-1.24701e-13	-0.0533243	-1.09113e-13	-0.055731	-1.09113e-13	-0.0461039	-1.40288e-13	-0.0493546	-4.67628e-14	-0.0571376	-1.40288e-13
0.0769	-0.0441035	-7.79381e-14	-0.0420718	-9.35257e-14	-0.0405715	-4.67628e-14	-0.0464165	-7.79381e-14	-0.0483232	-6.23504e-14	-0.0535743	-1.09113e-13	-0.0556998	1.55876e-14	-0.0462602	-1.87051e-13	-0.0493859	-4.67628e-14	-0.0570438	-6.23504e-14
0.077	-0.0440097	-9.35257e-14	-0.0421968	-4.67628e-14	-0.0405715	-7.79381e-14	-0.0464477	-1.24701e-13	-0.0483544	-7.79381e-14	-0.0535743	0	-0.0557623	-6.23504e-14	-0.0464165	0	-0.0493859	-6.23504e-14	-0.0571064	-7.79381e-14
0.0771	-0.0439472	-6.23504e-14	-0.0419155	-7.79381e-14	-0.0403839	-7.79381e-14	-0.0462602	-1.24701e-13	-0.0482294	-6.23504e-14	-0.0534493	3.11752e-14	-0.0558561	-9.35257e-14	-0.0463852	1.55876e-14	-0.049636	3.11752e-14	-0.0570126	-9.35257e-14
0.0772	-0.044041	-1.55876e-13	-0.0422281	-1.09113e-13	-0.0403214	-9.35257e-14	-0.0462915	-1.71464e-13	-0.0484482	-7.79381e-14	-0.0535431	-1.87051e-13	-0.0557623	0	-0.0462915	-1.55876e-13	-0.0495422	0	-0.0569501	-7.79381e-14
0.0773	-0.0441035	0	-0.0421656	-1.55876e-14	-0.0403527	-6.23504e-14	-0.0464165	0	-0.0483544	-7.79381e-14	-0.0536368	-3.11752e-14	-0.0557623	1.55876e-14	-0.0464165	-4.67628e-14	-0.0493546	-1.40288e-13	-0.0571376	-1.24701e-13
0.0774	-0.0439785	-6.23504e-14	-0.0419155	-1.24701e-13	-0.0402901	-6.23504e-14	-0.0464165	-7.79381e-14	-0.0485107	-4.67628e-14	-0.0535431	-4.67628e-14	-0.0557623	-4.67628e-14	-0.0464165	-4.67628e-14	-0.0494172	-1.24701e-13	-0.0569813	0
0.0775	-0.044041	-1.40288e-13	-0.0421343	-9.35257e-14	-0.0404152	-6.23504e-14	-0.0464165	-6.23504e-14	-0.0482294	0	-0.0536056	-9.35257e-14	-0.0557936	-7.79381e-14	-0.0462915	-1.24701e-13	-0.0494172	-6.23504e-14	-0.0569501	-1.71464e-13
0.0776	-0.044041	-1.09113e-13	-0.0420718	-6.23504e-14	-0.0404152	-6.23504e-14	-0.0463227	-9.35257e-14	-0.0481669	-1.24701e-13	-0.0534806	-1.09113e-13	-0.0556685	-1.09113e-13	-0.0463852	-9.35257e-14	-0.0494172	-4.67628e-14	-0.0569188	-9.35257e-14
0.0777	-0.0438847	-6.23504e-14	-0.041853	-9.35257e-14	-0.0403839	-1.09113e-13	-0.0462602	-1.24701e-13	-0.0481669	-7.79381e-14	-0.0534493	-1.09113e-13	-0.055731	-4.67628e-14	-0.0463852	-6.23504e-14	-0.0493234	-7.79381e-14	-0.0569501	-1.09113e-13
0.0778	-0.0438534	-1.24701e-13	-0.0418842	-7.79381e-14	-0.0403214	-1.24701e-13	-0.0463227	-1.40288e-13	-0.0482919	-7.79381e-14	-0.0535431	-9.35257e-14	-0.0556373	-3.11752e-14	-0.0463852	-6.23504e-14	-0.0492921	-2.02639e-13	-0.0569188	0
0.0779	-0.0439472	-3.11752e-14	-0.041978	-7.79381e-14	-0.0404464	-6.23504e-14	-0.0463852	-6.23504e-14	-0.0481981	-6.23504e-14	-0.0533555	0	-0.0556373	-7.79381e-14	-0.0463852	-4.67628e-14	-0.0494172	-4.67628e-14	-0.0570438	-6.23504e-14
0.078	-0.0441035	-7.79381e-14	-0.0421968	-6.23504e-14	-0.0403214	-6.23504e-14	-0.0465415	-1.55876e-14	-0.0482606	-9.35257e-14	-0.0533555	-1.40288e-13	-0.0554497	-4.67628e-14	-0.0465728	0	-0.0493546	-6.23504e-14	-0.0571689	-4.67628e-14
0.0781	-0.0441035	-1.24701e-13	-0.0420718	3.11752e-14	-0.0402276	-7.79381e-14	-0.046479	-4.67628e-14	-0.0483544	-7.79381e-14	-0.0533555	-9.35257e-14	-0.0556998	-9.35257e-14	-0.0467916	-3.11752e-14	-0.0493859	-3.11752e-14	-0.0572001	-4.67628e-14
0.0782	-0.0439159	-3.11752e-14	-0.0420718	-1.40288e-13	-0.0401964	-7.79381e-14	-0.0462915	-1.09113e-13	-0.0483232	0	-0.0532305	-3.11752e-14	-0.0557936	1.55876e-14	-0.0467603	-4.67628e-14	-0.0493234	-6.23504e-14	-0.0570438	-6.23504e-14
0.0783	-0.0438847	-1.09113e-13	-0.0421656	-1.09113e-13	-0.0401339	-6.23504e-14	-0.046354	-1.40288e-13	-0.0481669	-9.35257e-14	-0.0533243	-3.11752e-14	-0.0558248	-3.11752e-14	-0.046479	-1.71464e-13	-0.0491358	-1.87051e-13	-0.0570438	-1.09113e-13
0.0784	-0.0439159	-1.40288e-13	-0.0420718	0	-0.0403839	-6.23504e-14	-0.0463852	-7.79381e-14	-0.0483232	-2.02639e-13	-0.0536368	0	-0.0558873	-6.23504e-14	-0.0466978	-1.55876e-13	-0.0492296	-7.79381e-14	-0.0570438	-1.24701e-13
0.0785	-0.0439159	-9.35257e-14	-0.0420718	-9.35257e-14	-0.0401964	4.67628e-14	-0.0461977	-4.67628e-14	-0.0483857	4.67628e-14	-0.0533243	-3.11752e-14	-0.055731	-1.55876e-13	-0.0466665	-6.23504e-14	-0.0492921	-3.11752e-14	-0.0570438	-1.09113e-13
0.0786	-0.044041	-1.55876e-14	-0.041853	-1.40288e-13	-0.0401964	-9.35257e-14	-0.0462602	-1.09113e-13	-0.048542	0	-0.0533555	-7.79381e-14	-0.0557936	-1.24701e-13	-0.0469479	-6.23504e-14	-0.0493546	-4.67628e-14	-0.0571376	-4.67628e-14
0.0787	-0.0440722	-4.67628e-14	-0.041978	-7.79381e-14	-0.0404152	-7.79381e-14	-0.046479	-1.55876e-14	-0.0484169	-1.09113e-13	-0.0533555	-7.79381e-14	-0.0557936	-9.35257e-14	-0.0465415	-6.23504e-14	-0.0493859	-3.11752e-14	-0.0571689	-4.67628e-14
0.0788	-0.0439159	-7.79381e-14	-0.042103	-1.55876e-14	-0.0402901	0	-0.0463227	-1.55876e-14	-0.0483857	-6.23504e-14	-0.0533868	-6.23504e-14	-0.0559811	-1.55876e-14	-0.0466665	-2.33814e-13	-0.0495422	-7.79381e-14	-0.0570751	-4.67628e-14
0.0789	-0.0441035	-1.40288e-13	-0.0420718	0	-0.0403839	-1.09113e-13	-0.0463852	-6.23504e-14	-0.0481981	-1.71464e-13	-0.0532618	-9.35257e-14	-0.0558561	-3.11752e-14	-0.0466665	-7.79381e-14	-0.0495422	-3.11752e-14	-0.0570751	-1.09113e-13
0.079	-0.044041	-7.79381e-14	-0.0422281	-4.67628e-14	-0.0404152	-9.35257e-14	-0.046354	-3.11752e-14	-0.0482919	-1.24701e-13	-0.0533868	0	-0.0559498	-1.09113e-13	-0.0467291	-6.23504e-14	-0.0493859	0	-0.0570438	-1.24701e-13
0.0791	-0.0438222	-1.55876e-13	-0.0421343	-3.11752e-14	-0.0402589	-1.55876e-14	-0.0464477	-1.24701e-13	-0.0481356	-4.67628e-14	-0.053293	-1.55876e-14	-0.0561686	-9.35257e-14	-0.0467291	-3.11752e-14	-0.0492609	-1.40288e-13	-0.0569501	-7.79381e-14
0.0792	-0.0438222	-1.40288e-13	-0.0421343	-1.24701e-13	-0.0401964	-1.87051e-13	-0.0463852	-7.79381e-14	-0.0481356	-1.40288e-13	-0.053168	-1.09113e-13	-0.0559186	-6.23504e-14	-0.046604	-1.09113e-13	-0.0493234	-1.55876e-13	-0.0571689	-3.11752e-14
0.0793	-0.044041	-3.11752e-14	-0.0422593	-6.23504e-14	-0.0401339	-9.35257e-14	-0.046354	-9.35257e-14	-0.0481981	-6.23504e-14	-0.0532305	-7.79381e-14	-0.0561061	-1.71464e-13	-0.0467603	-1.24701e-13	-0.0493234	-1.09113e-13	-0.0571689	-4.67628e-14
0.0794	-0.0440097	-1.55876e-14	-0.0423218	-3.11752e-14	-0.0401964	-6.23504e-14	-0.046229	-1.09113e-13	-0.0482294	0	-0.0532618	1.55876e-14	-0.0561061	1.55876e-14	-0.0468541	-4.67628e-14	-0.0494172	-6.23504e-14	-0.0570126	-1.24701e-13
0.0795	-0.0439472	-7.79381e-14	-0.0420405	-1.24701e-13	-0.0401964	-1.55876e-14	-0.0464165	-6.23504e-14	-0.0479481	-9.35257e-14	-0.053168	-9.35257e-14	-0.0560124	-1.09113e-13	-0.0467291	-1.24701e-13	-0.0493859	0	-0.056825	-1.55876e-13
0.0796	-0.0440097	-1.24701e-13	-0.0419468	-1.55876e-13	-0.0400713	-1.09113e-13	-0.0462915	-6.23504e-14	-0.0481981	-1.24701e-13	-0.0532618	-1.24701e-13	-0.055731	-1.55876e-13	-0.0467291	-1.24701e-13	-0.0492296	-9.35257e-14	-0.0570438	-9.35257e-14
0.0797	-0.044041	0	-0.041853	-1.09113e-13	-0.0403527	-7.79381e-14	-0.0461664	-1.09113e-13	-0.0483544	4.67628e-14	-0.0531367	-3.11752e-14	-0.0557623	-2.18227e-13	-0.0467603	-6.23504e-14	-0.0491046	-7.79381e-14	-0.0570438	1.55876e-14
0.0798	-0.044166	-6.23504e-14	-0.0420718	-1.09113e-13	-0.0402589	9.35257e-14	-0.0461664	-7.79381e-14	-0.0481356	1.55876e-14	-0.053418	-6.23504e-14	-0.0558248	-4.67628e-14	-0.0466978	-9.35257e-14	-0.0492296	-1.24701e-13	-0.0569188	-6.23504e-14
0.0799	-0.0441035	-1.09113e-13	-0.0419468	0	-0.0403214	-6.23504e-14	-0.0464165	-6.23504e-14	-0.0481044	-2.02639e-13	-0.0533243	-1.55876e-14	-0.0558561	0	-0.0467916	-7.79381e-14	-0.0492609	1.55876e-14	-0.0569813	-7.79381e-14
0.08	-0.044166	-6.23504e-14	-0.0421656	-9.35257e-14	-0.0401964	-1.09113e-13	-0.046354	1.55876e-14	-0.0481356	-9.35257e-14	-0.0533555	3.11752e-14	-0.0557936	-7.79381e-14	-0.0467603	-6.23504e-14	-0.0492609	-4.67628e-14	-0.0569501	-6.23504e-14
0.0801	-0.0440722	-7.79381e-14	-0.0421343	-6.23504e-14	-0.0403527	-7.79381e-14	-0.0462602	-1.24701e-13	-0.0482919	-6.23504e-14	-0.0535118	-4.67628e-14	-0.0557936	-7.79381e-14	-0.0468853	-7.79381e-14	-0.0493859	-6.23504e-14	-0.0568876	-1.24701e-13
0.0802	-0.0440722	-1.09113e-13	-0.0420093	-1.55876e-14	-0.0402589	-7.79381e-14	-0.0465728	-7.79381e-14	-0.0482294	-1.55876e-14	-0.0535118	-1.24701e-13	-0.0557623	-7.79381e-14	-0.0469791	-6.23504e-14	-0.0492921	-9.35257e-14	-0.0571376	-4.67628e-14
0.0803	-0.044041	-7.79381e-14	-0.0420718	-1.40288e-13	-0.0403214	-7.79381e-14	-0.0463227	4.67628e-14	-0.0482606	-6.23504e-14	-0.0533868	-3.11752e-14	-0.0558561	-9.35257e-14	-0.0469479	1.55876e-14	-0.0492296	-1.40288e-13	-0.0570126	-3.11752e-14
0.0804	-0.0442598	-6.23504e-14	-0.0420093	-1.40288e-13	-0.0402276	0	-0.0462915	-1.71464e-13	-0.0481981	-9.35257e-14	-0.0533555	-1.24701e-13	-0.0558248	-7.79381e-14	-0.0469479	-4.67628e-14	-0.0494172	-1.40288e-13	-0.0568563	-1.24701e-13
0.0805	-0.0441347	-1.55876e-14	-0.0420405	-6.23504e-14	-0.0404464	-7.79381e-14	-0.0466353	-4.67628e-14	-0.0481044	-1.09113e-13	-0.053418	-9.35257e-14	-0.0557623	-1.09113e-13	-0.0470416	-1.71464e-13	-0.0494172	-6.23504e-14	-0.0568876	-1.24701e-13
0.0806	-0.0441347	-7.79381e-14	-0.0420718	-6.23504e-14	-0.0405089	0	-0.0463852	-4.67628e-14	-0.0482919	-6.23504e-14	-0.0532305	-7.79381e-14	-0.0557936	-4.67628e-14	-0.0469166	-7.79381e-14	-0.0492921	-9.35257e-14	-0.0570751	-3.11752e-14
0.0807	-0.0440097	-7.79381e-14	-0.0421343	-1.40288e-13	-0.0404152	-6.23504e-14	-0.046229	-1.40288e-13	-0.0482919	-4.67628e-14	-0.0533555	-9.35257e-14	-0.0559186	-6.23504e-14	-0.0467916	-1.09113e-13	-0.0492609	-1.09113e-13	-0.0571064	-4.67628e-14
0.0808	-0.044041	-1.40288e-13	-0.0421656	-3.11752e-14	-0.0404464	-6.23504e-14	-0.0463852	-7.79381e-14	-0.0483232	-6.23504e-14	-0.0533555	-9.35257e-14	-0.0558561	-6.23504e-14	-0.0468541	-1.09113e-13	-0.0492921	-9.35257e-14	-0.0570751	-4.67628e-14
0.0809	-0.0441347	-6.23504e-14	-0.042103	-7.79381e-14	-0.0404152	-4.67628e-14	-0.0462915	3.11752e-14	-0.0482919	-7.79381e-14	-0.053418	0	-0.0558248	-7.79381e-14	-0.0468228	-7.79381e-14	-0.0492921	-1.09113e-13	-0.0569813	-9.35257e-14
0.081	-0.0439159	-1.55876e-14	-0.0420718	-1.55876e-13	-0.0403839	-1.55876e-13	-0.0462602	-7.79381e-14	-0.0483857	-7.79381e-14	-0.0533243	-1.09113e-13	-0.0557623	-6.23504e-14	-0.0467603	-1.55876e-13	-0.0492921	0	-0.0569501	-6.23504e-14
0.0811	-0.0441035	-1.09113e-13	-0.0420718	0	-0.0404152	-6.23504e-14	-0.0462602	-1.09113e-13	-0.0485732	-6.23504e-14	-0.0531367	-2.02639e-13	-0.0558248	-7.79381e-14	-0.0468853	-1.24701e-13	-0.0493859	-6.23504e-14	-0.0571376	-9.35257e-14
0.0812	-0.044041	0	-0.0419468	-1.09113e-13	-0.0403214	-6.23504e-14	-0.0461352	-1.40288e-13	-0.0483544	-3.11752e-14	-0.0533868	-4.67628e-14	-0.0559186	-6.23504e-14	-0.0469166	3.11752e-14	-0.0494172	-6.23504e-14	-0.0573251	-4.67628e-14
0.0813	-0.0441347	-6.23504e-14	-0.0420718	-1.40288e-13	-0.0403214	-9.35257e-14	-0.0462602	-6.23504e-14	-0.0483232	-1.09113e-13	-0.0533243	1.55876e-14	-0.0558561	-6.23504e-14	-0.0468541	-4.67628e-14	-0.0493859	-3.11752e-14	-0.0572001	1.55876e-14
0.0814	-0.0440722	-7.79381e-14	-0.041978	4.67628e-14	-0.0403839	-9.35257e-14	-0.0460414	-6.23504e-14	-0.0482294	-1.24701e-13	-0.053418	-4.67628e-14	-0.0557623	-1.09113e-13	-0.0468541	-1.09113e-13	-0.0494172	-1.55876e-13	-0.0570751	-1.24701e-13
0.0815	-0.044166	-1.24701e-13	-0.0418842	-1.55876e-13	-0.0405715	-1.09113e-13	-0.046229	-1.24701e-13	-0.0481981	-6.23504e-14	-0.0533243	-9.35257e-14	-0.0558873	-7.79381e-14	-0.0468228	-1.24701e-13	-0.0493234	-7.79381e-14	-0.0572314	-9.35257e-14
0.0816	-0.0442285	0	-0.0419155	-4.67628e-14	-0.0404152	0	-0.0463227	0	-0.0483232	-1.09113e-13	-0.0532305	-1.24701e-13	-0.0559498	0	-0.0469166	-7.79381e-14	-0.0493546	-9.35257e-14	-0.0572939	0
0.0817	-0.044291	-7.79381e-14	-0.0419155	-1.09113e-13	-0.0405089	-4.67628e-14	-0.0461977	0	-0.0485107	7.79381e-14	-0.0533555	-4.67628e-14	-0.0557936	-6.23504e-14	-0.0468228	-4.67628e-14	-0.0494172	-4.67628e-14	-0.0570751	-1.40288e-13
0.0818	-0.0443223	-9.35257e-14	-0.041728	-1.40288e-13	-0.0406652	-6.23504e-14	-0.0461977	-1.09113e-13	-0.0483232	-3.11752e-14	-0.0533868	0	-0.0558248	-1.55876e-13	-0.0468853	-7.79381e-14	-0.0491984	-3.11752e-14	-0.0571376	-1.24701e-13
0.0819	-0.0441973	-7.79381e-14	-0.0414466	-1.24701e-13	-0.0405715	-7.79381e-14	-0.046229	-7.79381e-14	-0.0484169	-1.24701e-13	-0.053418	-7.79381e-14	-0.0558873	-3.11752e-14	-0.0468541	-4.67628e-14	-0.0491358	-1.24701e-13	-0.0571376	-4.67628e-14
0.082	-0.0445098	-7.79381e-14	-0.041728	-1.24701e-13	-0.0405089	-1.24701e-13	-0.0462602	-6.23504e-14	-0.0483857	-9.35257e-14	-0.0532618	-9.35257e-14	-0.0559186	0	-0.0471667	-3.11752e-14	-0.0491984	-1.40288e-13	-0.0574814	-6.23504e-14
0.0821	-0.0441035	-9.35257e-14	-0.0419155	0	-0.0405402	-9.35257e-14	-0.0460727	-1.40288e-13	-0.0483857	-9.35257e-14	-0.0531992	-9.35257e-14	-0.0557936	-7.79381e-14	-0.0470729	1.55876e-14	-0.0493859	0	-0.0572314	-3.11752e-14
0.0822	-0.0441973	-1.71464e-13	-0.0419468	4.67628e-14	-0.0406027	0	-0.0462602	-7.79381e-14	-0.0482294	-9.35257e-14	-0.0532305	-4.67628e-14	-0.0558248	-9.35257e-14	-0.0469791	-1.40288e-13	-0.0493234	0	-0.0572626	-1.09113e-13
0.0823	-0.0441347	-4.67628e-14	-0.0419468	-9.35257e-14	-0.0405715	-1.24701e-13	-0.0461977	-6.23504e-14	-0.0482294	-1.40288e-13	-0.0533243	-9.35257e-14	-0.0557623	-4.67628e-14	-0.0470104	-9.35257e-14	-0.0493859	-3.11752e-14	-0.0573251	-6.23504e-14
0.0824	-0.044166	-9.35257e-14	-0.0419468	-6.23504e-14	-0.0406652	-6.23504e-14	-0.0461352	-6.23504e-14	-0.0481981	-3.11752e-14	-0.0532618	-1.09113e-13	-0.0556685	-9.35257e-14	-0.0471041	-9.35257e-14	-0.0492609	-4.67628e-14	-0.0574814	-4.67628e-14
0.0825	-0.044291	-1.55876e-14	-0.041853	0	-0.0404464	-6.23504e-14	-0.0461664	-6.23504e-14	-0.0483544	-6.23504e-14	-0.0532618	-4.67628e-14	-0.0557936	-4.67628e-14	-0.0468541	-4.67628e-14	-0.0494172	-1.09113e-13	-0.0572314	1.55876e-14
0.0826	-0.044291	1.55876e-14	-0.041978	-9.35257e-14	-0.0404152	-1.24701e-13	-0.0461352	-4.67628e-14	-0.0482606	-1.09113e-13	-0.0533555	-1.40288e-13	-0.0557936	0	-0.0468853	-1.55876e-13	-0.0491984	-6.23504e-14	-0.0572314	-1.71464e-13
0.0827	-0.0443848	-4.67628e-14	-0.0419155	0	-0.0404152	-1.40288e-13	-0.046229	0	-0.0482294	-7.79381e-14	-0.053418	-1.55876e-14	-0.0557936	-1.24701e-13	-0.0468228	-7.79381e-14	-0.0491671	-1.40288e-13	-0.0572626	-1.24701e-13
0.0828	-0.044291	-6.23504e-14	-0.0419468	-9.35257e-14	-0.0404464	-9.35257e-14	-0.0461039	-1.09113e-13	-0.0482919	0	-0.0533243	-3.11752e-14	-0.0558873	-9.35257e-14	-0.0470104	-6.23504e-14	-0.0492609	-7.79381e-14	-0.0572939	-4.67628e-14
0.0829	-0.0441347	-1.40288e-13	-0.0420093	0	-0.0403527	-6.23504e-14	-0.0461664	-1.09113e-13	-0.0482606	-3.11752e-14	-0.0535118	-9.35257e-14	-0.0559186	-3.11752e-14	-0.0472917	3.11752e-14	-0.0493859	-4.67628e-14	-0.0572001	-6.23504e-14
0.083	-0.0441347	-1.09113e-13	-0.0417905	-9.35257e-14	-0.0403214	-3.11752e-14	-0.046229	-4.67628e-14	-0.0482294	-1.40288e-13	-0.053293	-7.79381e-14	-0.0558561	-9.35257e-14	-0.0471979	4.67628e-14	-0.0494484	0	-0.0572626	-1.55876e-13
0.0831	-0.0440722	0	-0.0420718	-1.55876e-13	-0.0405089	-1.09113e-13	-0.0459164	-7.79381e-14	-0.0484794	-1.09113e-13	-0.0534493	-7.79381e-14	-0.0557936	-1.40288e-13	-0.0472917	-1.09113e-13	-0.0494797	-1.09113e-13	-0.0572939	-6.23504e-14
0.0832	-0.0442598	-9.35257e-14	-0.0419468	-4.67628e-14	-0.0404152	4.67628e-14	-0.0460727	-7.79381e-14	-0.0481356	-4.67628e-14	-0.0533243	-4.67628e-14	-0.0558561	-6.23504e-14	-0.0471979	-1.24701e-13	-0.0493546	-7.79381e-14	-0.0572939	-6.23504e-14
0.0833	-0.0439472	-7.79381e-14	-0.0421968	-3.11752e-14	-0.0404777	0	-0.0460102	-4.67628e-14	-0.0482606	-1.40288e-13	-0.0531992	-1.40288e-13	-0.0560436	-4.67628e-14	-0.0470104	-1.71464e-13	-0.0493546	-1.40288e-13	-0.0572939	-6.23504e-14
0.0834	-0.044041	-1.40288e-13	-0.0420093	0	-0.0403214	-9.35257e-14	-0.0458539	0	-0.0483857	-1.55876e-14	-0.0531992	-9.35257e-14	-0.0558873	-3.11752e-14	-0.0472604	-9.35257e-14	-0.0494484	-6.23504e-14	-0.0571689	-9.35257e-14
0.0835	-0.0441973	-4.67628e-14	-0.0419155	-1.24701e-13	-0.0402589	-1.40288e-13	-0.0459789	-9.35257e-14	-0.0482919	-3.11752e-14	-0.0533243	0	-0.0559498	-1.24701e-13	-0.0471354	0	-0.0492609	-4.67628e-14	-0.0572314	-1.09113e-13
0.0836	-0.0441973	6.23504e-14	-0.041978	-1.55876e-13	-0.0402589	-4.67628e-14	-0.0459789	-3.11752e-14	-0.0481981	-9.35257e-14	-0.053293	-7.79381e-14	-0.0559498	-1.24701e-13	-0.0471041	-4.67628e-14	-0.0491358	-1.24701e-13	-0.0572626	-9.35257e-14
0.0837	-0.0440097	-9.35257e-14	-0.0420405	0	-0.0403527	-6.23504e-14	-0.0461977	-4.67628e-14	-0.0482294	-9.35257e-14	-0.0532305	-3.11752e-14	-0.0558873	-1.55876e-14	-0.0472604	-6.23504e-14	-0.0491984	-1.24701e-13	-0.0572939	-6.23504e-14
0.0838	-0.0441035	-9.35257e-14	-0.041978	-7.79381e-14	-0.0404152	-9.35257e-14	-0.0462915	-4.67628e-14	-0.0483544	-4.67628e-14	-0.0531992	-1.09113e-13	-0.0559186	-1.09113e-13	-0.0472292	-9.35257e-14	-0.0492609	1.55876e-14	-0.0572626	-1.09113e-13
0.0839	-0.0440097	-4.67628e-14	-0.041978	-6.23504e-14	-0.0403527	-6.23504e-14	-0.046229	-6.23504e-14	-0.0482606	-4.67628e-14	-0.053168	-1.09113e-13	-0.0558248	-6.23504e-14	-0.0473542	-9.35257e-14	-0.0493859	0	-0.0572939	-7.79381e-14
0.084	-0.0438534	-1.24701e-13	-0.0420405	-1.40288e-13	-0.0402589	-1.40288e-13	-0.0461664	-7.79381e-14	-0.0482606	-9.35257e-14	-0.0532618	-9.35257e-14	-0.0558873	-6.23504e-14	-0.0473855	1.55876e-14	-0.0492921	-6.23504e-14	-0.0572314	-7.79381e-14
0.0841	-0.044041	-1.24701e-13	-0.0420718	-6.23504e-14	-0.0402901	-3.11752e-14	-0.046354	-4.67628e-14	-0.0482294	-3.11752e-14	-0.053293	3.11752e-14	-0.0559186	-9.35257e-14	-0.0473855	-6.23504e-14	-0.0493859	-6.23504e-14	-0.0572001	-1.09113e-13
0.0842	-0.044041	1.55876e-14	-0.0419468	-9.35257e-14	-0.0403527	-4.67628e-14	-0.0460102	-3.11752e-14	-0.0481356	-3.11752e-14	-0.0532618	-4.67628e-14	-0.0559186	-4.67628e-14	-0.0472292	-9.35257e-14	-0.0493546	-6.23504e-14	-0.0569813	-9.35257e-14
0.0843	-0.0438222	-6.23504e-14	-0.0420405	-1.40288e-13	-0.0401651	-7.79381e-14	-0.0460102	-1.87051e-13	-0.0482606	-1.09113e-13	-0.053168	-1.09113e-13	-0.0556998	-4.67628e-14	-0.0473542	-1.40288e-13	-0.0492609	-6.23504e-14	-0.0570126	-6.23504e-14
0.0844	-0.0437597	-6.23504e-14	-0.0420405	-4.67628e-14	-0.0403214	-6.23504e-14	-0.0463852	-1.24701e-13	-0.0482294	-9.35257e-14	-0.053168	-1.24701e-13	-0.0557623	-1.24701e-13	-0.0473542	-4.67628e-14	-0.0492921	-1.24701e-13	-0.0571689	-3.11752e-14
0.0845	-0.0439472	-1.40288e-13	-0.0422593	-1.55876e-14	-0.0404152	0	-0.0462915	3.11752e-14	-0.0481669	-4.67628e-14	-0.0531992	-6.23504e-14	-0.0558561	-1.09113e-13	-0.0472292	-3.11752e-14	-0.0492296	0	-0.0572001	0
0.0846	-0.0437597	-1.55876e-14	-0.0421343	-3.11752e-14	-0.0404464	-4.67628e-14	-0.0463852	-4.67628e-14	-0.0481669	-7.79381e-14	-0.0532618	-1.09113e-13	-0.0557936	3.11752e-14	-0.0471041	-2.02639e-13	-0.0494172	-1.55876e-13	-0.0572626	-3.11752e-14
0.0847	-0.0439472	-4.67628e-14	-0.0420405	-1.09113e-13	-0.0405089	-9.35257e-14	-0.0463227	-1.09113e-13	-0.0481669	-6.23504e-14	-0.0533555	0	-0.0557936	-1.24701e-13	-0.0474167	-9.35257e-14	-0.0493546	-1.55876e-14	-0.0573251	-9.35257e-14
0.0848	-0.0436971	-6.23504e-14	-0.0423844	-4.67628e-14	-0.0405715	-6.23504e-14	-0.0462915	-7.79381e-14	-0.0481669	-1.24701e-13	-0.0531367	-9.35257e-14	-0.0558248	-6.23504e-14	-0.0472917	6.23504e-14	-0.0492921	-4.67628e-14	-0.0573877	-1.55876e-13
0.0849	-0.0437284	-1.09113e-13	-0.0422281	0	-0.0404464	-4.67628e-14	-0.0463227	-1.09113e-13	-0.0481356	-1.09113e-13	-0.0530742	-1.40288e-13	-0.0559186	-3.11752e-14	-0.0471041	-1.40288e-13	-0.0492609	-1.40288e-13	-0.0572626	0
0.085	-0.0437909	-7.79381e-14	-0.0421343	-1.24701e-13	-0.0402276	-9.35257e-14	-0.0461664	-1.55876e-13	-0.0480106	-9.35257e-14	-0.0532305	-7.79381e-14	-0.0557936	-1.55876e-14	-0.0472604	-1.24701e-13	-0.0492296	-6.23504e-14	-0.0573564	-9.35257e-14
0.0851	-0.0440722	1.55876e-14	-0.0422906	-1.09113e-13	-0.0401964	-1.24701e-13	-0.0461352	-1.09113e-13	-0.0481669	-3.11752e-14	-0.0532618	-6.23504e-14	-0.055731	-9.35257e-14	-0.0472292	-4.67628e-14	-0.0491984	-9.35257e-14	-0.0571689	-7.79381e-14
0.0852	-0.0439159	0	-0.0421343	-4.67628e-14	-0.0403214	-1.55876e-13	-0.0462915	-7.79381e-14	-0.0481044	-3.11752e-14	-0.053168	-6.23504e-14	-0.0557623	-9.35257e-14	-0.0471354	-1.09113e-13	-0.0492609	-4.67628e-14	-0.0573877	-1.55876e-13
0.0853	-0.0440097	-3.11752e-14	-0.0420405	-9.35257e-14	-0.0404464	0	-0.0462602	-3.11752e-14	-0.0481981	-1.55876e-14	-0.0532305	-6.23504e-14	-0.0559186	-9.35257e-14	-0.0471667	-1.09113e-13	-0.0491984	-4.67628e-14	-0.0572939	3.11752e-14
0.0854	-0.0440722	-4.67628e-14	-0.0422281	-9.35257e-14	-0.0403839	3.11752e-14	-0.0461352	-3.11752e-14	-0.0481669	-3.11752e-14	-0.0532618	-9.35257e-14	-0.0557623	-3.11752e-14	-0.0472604	-1.09113e-13	-0.0490733	-1.09113e-13	-0.0573877	-1.24701e-13
0.0855	-0.0440097	-9.35257e-14	-0.0421343	-4.67628e-14	-0.0405402	-9.35257e-14	-0.0461664	-1.40288e-13	-0.0480731	-1.40288e-13	-0.053168	-6.23504e-14	-0.0558248	-1.09113e-13	-0.0473229	-4.67628e-14	-0.0491984	-1.71464e-13	-0.0574502	-4.67628e-14
0.0856	-0.0439159	-9.35257e-14	-0.0422593	-1.09113e-13	-0.0404464	1.55876e-14	-0.046229	-1.09113e-13	-0.0481044	-9.35257e-14	-0.053168	-6.23504e-14	-0.0560749	-6.23504e-14	-0.0471041	-6.23504e-14	-0.0490733	-7.79381e-14	-0.0573251	-6.23504e-14
0.0857	-0.0440097	-9.35257e-14	-0.0421968	0	-0.0404152	-1.40288e-13	-0.0462915	0	-0.0481044	-1.09113e-13	-0.0530742	-7.79381e-14	-0.0556373	-9.35257e-14	-0.0471979	-1.40288e-13	-0.0492296	3.11752e-14	-0.0572626	-1.40288e-13
0.0858	-0.0440722	-4.67628e-14	-0.0420718	-1.24701e-13	-0.0403214	-9.35257e-14	-0.0462602	-6.23504e-14	-0.0481044	-7.79381e-14	-0.0531367	-1.09113e-13	-0.0558873	-1.24701e-13	-0.0473855	0	-0.0491671	1.55876e-14	-0.0573564	-1.24701e-13
0.0859	-0.0440097	-7.79381e-14	-0.0421968	-1.24701e-13	-0.0404152	0	-0.0462915	-1.24701e-13	-0.0481044	-6.23504e-14	-0.0533243	-4.67628e-14	-0.0559186	-4.67628e-14	-0.0473229	-3.11752e-14	-0.048917	-1.71464e-13	-0.0574502	1.55876e-14
0.086	-0.0439472	-1.40288e-13	-0.0419468	-1.55876e-14	-0.0404152	-7.79381e-14	-0.0462915	-9.35257e-14	-0.0482919	-7.79381e-14	-0.0532618	-9.35257e-14	-0.0558248	-4.67628e-14	-0.0471354	-7.79381e-14	-0.0491046	-1.24701e-13	-0.0573877	-4.67628e-14
0.0861	-0.0439785	-1.24701e-13	-0.0421656	-1.24701e-13	-0.0401964	0	-0.0463227	-9.35257e-14	-0.0480731	-3.11752e-14	-0.0532305	-1.40288e-13	-0.0556373	-9.35257e-14	-0.0471041	-1.55876e-13	-0.0490108	1.55876e-14	-0.0572314	-1.24701e-13
0.0862	-0.0437597	-7.79381e-14	-0.0419468	-4.67628e-14	-0.0402589	-1.87051e-13	-0.0461352	-4.67628e-14	-0.0481669	-7.79381e-14	-0.0533243	-6.23504e-14	-0.0559186	-1.55876e-13	-0.0472292	-6.23504e-14	-0.0490421	-9.35257e-14	-0.0572314	-1.71464e-13
0.0863	-0.0440097	-1.71464e-13	-0.042103	-6.23504e-14	-0.0402589	-4.67628e-14	-0.0460414	-9.35257e-14	-0.0483232	-9.35257e-14	-0.0531992	-1.09113e-13	-0.0557936	0	-0.0471041	0	-0.0488233	-4.67628e-14	-0.0570751	-3.11752e-14
0.0864	-0.0440097	4.67628e-14	-0.0421343	-9.35257e-14	-0.0403839	-6.23504e-14	-0.0461977	-1.24701e-13	-0.0483232	-6.23504e-14	-0.0532618	-6.23504e-14	-0.0556685	-9.35257e-14	-0.0469479	-9.35257e-14	-0.0490733	-9.35257e-14	-0.0571689	-1.40288e-13
0.0865	-0.0439159	-6.23504e-14	-0.0419155	-1.55876e-14	-0.0402901	-4.67628e-14	-0.0461977	-3.11752e-14	-0.0482606	-9.35257e-14	-0.0532618	-3.11752e-14	-0.0558873	-1.09113e-13	-0.0469166	-1.09113e-13	-0.0491671	-1.55876e-14	-0.0573251	-4.67628e-14
0.0866	-0.0438534	-1.24701e-13	-0.0418842	-1.55876e-13	-0.0406652	-1.24701e-13	-0.046229	-3.11752e-14	-0.0481981	-6.23504e-14	-0.0531992	-6.23504e-14	-0.0558248	3.11752e-14	-0.0468853	-9.35257e-14	-0.0489796	0	-0.0571064	3.11752e-14
0.0867	-0.0440722	-4.67628e-14	-0.042103	-6.23504e-14	-0.0405402	0	-0.0461352	-1.40288e-13	-0.0481981	-1.09113e-13	-0.0533868	-1.40288e-13	-0.055731	-9.35257e-14	-0.0471041	-1.09113e-13	-0.0490733	-9.35257e-14	-0.0571376	-1.71464e-13
0.0868	-0.044041	3.11752e-14	-0.0419468	1.55876e-14	-0.0404152	-7.79381e-14	-0.0461977	-1.24701e-13	-0.0483544	-3.11752e-14	-0.0532305	1.55876e-14	-0.0557623	-1.40288e-13	-0.0471667	7.79381e-14	-0.0490108	-9.35257e-14	-0.0571376	-3.11752e-14
0.0869	-0.0437909	-4.67628e-14	-0.0421656	-7.79381e-14	-0.0404777	-1.24701e-13	-0.0462602	-7.79381e-14	-0.0482919	-9.35257e-14	-0.0531055	-1.24701e-13	-0.0559498	-9.35257e-14	-0.0473229	-1.55876e-14	-0.0490421	-6.23504e-14	-0.0572939	-4.67628e-14
0.087	-0.0441347	-1.71464e-13	-0.042103	-3.11752e-14	-0.0402589	-6.23504e-14	-0.0461352	3.11752e-14	-0.0482919	-1.09113e-13	-0.0532618	-9.35257e-14	-0.0556685	1.55876e-14	-0.0471041	-7.79381e-14	-0.0490733	-4.67628e-14	-0.0571689	-3.11752e-14
0.0871	-0.044166	6.23504e-14	-0.0421343	-7.79381e-14	-0.0404464	-1.71464e-13	-0.0462915	-7.79381e-14	-0.0482606	-6.23504e-14	-0.053293	-6.23504e-14	-0.0557623	-1.87051e-13	-0.0470729	-1.09113e-13	-0.0488233	0	-0.0572626	-9.35257e-14
0.0872	-0.0441035	-1.09113e-13	-0.0420718	-6.23504e-14	-0.0404152	-9.35257e-14	-0.0465415	-3.11752e-14	-0.0484169	-1.55876e-13	-0.053293	-3.11752e-14	-0.0558873	-1.09113e-13	-0.0471979	-9.35257e-14	-0.0490108	-1.40288e-13	-0.0572314	-9.35257e-14
0.0873	-0.0441973	-1.24701e-13	-0.042103	-9.35257e-14	-0.0403839	-1.55876e-14	-0.0463852	1.55876e-14	-0.0481981	-7.79381e-14	-0.0532305	-4.67628e-14	-0.0558873	1.55876e-14	-0.0471979	0	-0.0490108	-4.67628e-14	-0.0573564	-7.79381e-14
0.0874	-0.0442285	-4.67628e-14	-0.0419155	-4.67628e-14	-0.0403214	-1.09113e-13	-0.0464477	-1.40288e-13	-0.0483544	-1.09113e-13	-0.0531992	-1.87051e-13	-0.0556998	-7.79381e-14	-0.0472292	-7.79381e-14	-0.048917	-7.79381e-14	-0.0573251	-4.67628e-14
0.0875	-0.0440722	-7.79381e-14	-0.042103	-7.79381e-14	-0.040634	-4.67628e-14	-0.0462915	-1.09113e-13	-0.0485107	-3.11752e-14	-0.0532618	-1.24701e-13	-0.0556685	-1.87051e-13	-0.0471667	-1.24701e-13	-0.0490108	-9.35257e-14	-0.0570438	-7.79381e-14
0.0876	-0.0440097	-1.71464e-13	-0.041978	-4.67628e-14	-0.0403839	0	-0.0462602	-1.24701e-13	-0.0484169	1.55876e-14	-0.0535743	-1.55876e-14	-0.0557623	-4.67628e-14	-0.0472604	-1.09113e-13	-0.0491671	-7.79381e-14	-0.0571064	-2.02639e-13
0.0877	-0.044041	-6.23504e-14	-0.0419155	-1.09113e-13	-0.0405715	-1.87051e-13	-0.0463227	-9.35257e-14	-0.0485107	-9.35257e-14	-0.0534806	3.11752e-14	-0.0558873	1.55876e-14	-0.0471041	-4.67628e-14	-0.0491671	-7.79381e-14	-0.0572001	-1.09113e-13
0.0878	-0.0440097	-6.23504e-14	-0.0420405	-9.35257e-14	-0.0405402	0	-0.0462602	-7.79381e-14	-0.0485107	-9.35257e-14	-0.0533555	-1.55876e-13	-0.0558561	-3.11752e-14	-0.0469166	-1.87051e-13	-0.0491358	-7.79381e-14	-0.0573877	6.23504e-14
0.0879	-0.044041	-1.40288e-13	-0.0420718	0	-0.0406652	-7.79381e-14	-0.0461664	-1.40288e-13	-0.0486357	-6.23504e-14	-0.0533243	-1.24701e-13	-0.0559498	-3.11752e-14	-0.0471667	-1.09113e-13	-0.0491984	-6.23504e-14	-0.0573877	-3.11752e-14
0.088	-0.0439159	-3.11752e-14	-0.0420405	-1.09113e-13	-0.0406027	-4.67628e-14	-0.0461977	-1.09113e-13	-0.0486045	-6.23504e-14	-0.0531992	-1.09113e-13	-0.0559498	-4.67628e-14	-0.0470729	3.11752e-14	-0.0490733	-1.40288e-13	-0.0573251	-9.35257e-14
0.0881	-0.0439472	-4.67628e-14	-0.042103	-1.55876e-13	-0.0405402	-9.35257e-14	-0.046354	-1.55876e-14	-0.0485107	-1.24701e-13	-0.053293	-9.35257e-14	-0.0558873	-7.79381e-14	-0.0470104	-9.35257e-14	-0.0491358	-1.24701e-13	-0.0571376	-1.24701e-13
0.0882	-0.0442285	-4.67628e-14	-0.042103	-4.67628e-14	-0.0403527	-1.87051e-13	-0.0461664	0	-0.0485107	-1.87051e-13	-0.053293	-3.11752e-14	-0.0558561	-6.23504e-14	-0.0472292	-1.24701e-13	-0.0490733	-7.79381e-14	-0.0572314	-1.40288e-13
0.0883	-0.044166	-3.11752e-14	-0.0420093	0	-0.0402901	-1.40288e-13	-0.0464477	-1.55876e-13	-0.0485732	-7.79381e-14	-0.053168	-3.11752e-14	-0.0558248	-4.67628e-14	-0.0469479	0	-0.0491984	-1.24701e-13	-0.0572314	1.55876e-14
0.0884	-0.044166	-4.67628e-14	-0.0421656	-7.79381e-14	-0.0406965	-4.67628e-14	-0.046354	-3.11752e-14	-0.0486045	-1.55876e-14	-0.0531367	-2.02639e-13	-0.0558561	-1.09113e-13	-0.0471667	-1.24701e-13	-0.0491358	3.11752e-14	-0.0572626	-1.09113e-13
0.0885	-0.044041	-1.40288e-13	-0.0420093	-6.23504e-14	-0.0403527	3.11752e-14	-0.046354	-7.79381e-14	-0.0487295	-9.35257e-14	-0.053293	-4.67628e-14	-0.0559498	-4.67628e-14	-0.0471354	0	-0.0491358	-1.09113e-13	-0.0573251	-7.79381e-14
0.0886	-0.0441035	-1.24701e-13	-0.041978	-1.24701e-13	-0.0404464	-1.55876e-13	-0.0461977	-1.24701e-13	-0.0484482	-1.09113e-13	-0.0535118	-3.11752e-14	-0.0558561	-9.35257e-14	-0.0471354	-7.79381e-14	-0.0490733	-6.23504e-14	-0.0572314	-4.67628e-14
0.0887	-0.0440722	-6.23504e-14	-0.0420093	-9.35257e-14	-0.0405402	-1.55876e-14	-0.0463852	-4.67628e-14	-0.0486045	-1.24701e-13	-0.0533243	-7.79381e-14	-0.0556998	-7.79381e-14	-0.0471667	-1.09113e-13	-0.0491046	-1.40288e-13	-0.0573564	-6.23504e-14
0.0888	-0.0441035	-1.09113e-13	-0.0419468	-1.55876e-14	-0.040634	0	-0.0463852	-1.55876e-14	-0.048542	3.11752e-14	-0.0535431	-3.11752e-14	-0.0557623	-7.79381e-14	-0.0470416	-1.55876e-14	-0.0490733	-1.24701e-13	-0.0573251	-7.79381e-14
0.0889	-0.0439159	-1.09113e-13	-0.0419155	-6.23504e-14	-0.0404464	-3.11752e-14	-0.0463852	-6.23504e-14	-0.0486045	-1.09113e-13	-0.0533243	-3.11752e-14	-0.0557936	0	-0.0471041	-1.40288e-13	-0.0489796	-6.23504e-14	-0.0572939	-1.09113e-13
0.089	-0.0439472	-1.24701e-13	-0.0420405	-4.67628e-14	-0.0405402	-1.55876e-13	-0.0464165	-3.11752e-14	-0.048667	-1.09113e-13	-0.053418	-1.55876e-13	-0.0559186	0	-0.0471667	-9.35257e-14	-0.048792	-1.09113e-13	-0.0573564	0
0.0891	-0.0441035	-4.67628e-14	-0.0421968	0	-0.0405715	-6.23504e-14	-0.0462602	-7.79381e-14	-0.0485732	0	-0.0535118	-6.23504e-14	-0.0556998	-6.23504e-14	-0.0472292	-1.55876e-14	-0.0488545	-1.09113e-13	-0.0575439	-6.23504e-14
0.0892	-0.0441035	1.55876e-14	-0.041978	-1.55876e-14	-0.0403839	-6.23504e-14	-0.0461664	-1.40288e-13	-0.048542	-1.09113e-13	-0.0533555	-7.79381e-14	-0.0555748	-1.55876e-13	-0.0470729	-1.24701e-13	-0.0488233	-4.67628e-14	-0.0574189	-3.11752e-14
0.0893	-0.0440722	-1.09113e-13	-0.042103	-1.09113e-13	-0.0401964	-1.09113e-13	-0.0461352	-9.35257e-14	-0.0484794	-1.09113e-13	-0.0533555	-1.24701e-13	-0.0557623	-9.35257e-14	-0.0470729	-1.55876e-13	-0.0490108	-3.11752e-14	-0.0574189	-1.40288e-13
0.0894	-0.0440722	-4.67628e-14	-0.0420718	-1.55876e-14	-0.0403839	-1.24701e-13	-0.0460727	-9.35257e-14	-0.0485732	-4.67628e-14	-0.0533243	-9.35257e-14	-0.055731	4.67628e-14	-0.0471979	-7.79381e-14	-0.0490108	0	-0.0573877	-7.79381e-14
0.0895	-0.0440097	-1.24701e-13	-0.0420718	-9.35257e-14	-0.0404152	4.67628e-14	-0.0461352	-3.11752e-14	-0.0484482	0	-0.0534806	-4.67628e-14	-0.0558561	-9.35257e-14	-0.0472292	-3.11752e-14	-0.0488233	-7.79381e-14	-0.0572939	-1.24701e-13
0.0896	-0.0439159	-1.09113e-13	-0.0418842	-9.35257e-14	-0.0402901	-7.79381e-14	-0.0462915	-1.40288e-13	-0.048542	-9.35257e-14	-0.053418	-6.23504e-14	-0.055731	-4.67628e-14	-0.0468228	-9.35257e-14	-0.0490733	-9.35257e-14	-0.0573251	-1.40288e-13
0.0897	-0.044041	-6.23504e-14	-0.0420718	-9.35257e-14	-0.0403214	-1.24701e-13	-0.0461352	-3.11752e-14	-0.048542	-6.23504e-14	-0.0534493	-4.67628e-14	-0.0556998	-1.09113e-13	-0.0471667	-1.71464e-13	-0.0490733	3.11752e-14	-0.0572939	-4.67628e-14
0.0898	-0.044041	-3.11752e-14	-0.0420405	-3.11752e-14	-0.0402276	0	-0.046354	-1.09113e-13	-0.0484482	-1.40288e-13	-0.053293	-1.09113e-13	-0.0556373	-9.35257e-14	-0.0471354	6.23504e-14	-0.048917	-7.79381e-14	-0.0572626	-4.67628e-14
0.0899	-0.0438222	-6.23504e-14	-0.0419468	-9.35257e-14	-0.0404152	-9.35257e-14	-0.0464477	1.55876e-14	-0.0482606	-1.09113e-13	-0.053418	-1.40288e-13	-0.055731	-1.24701e-13	-0.0470729	-4.67628e-14	-0.0489483	-1.24701e-13	-0.0573564	-1.09113e-13
0.09	-0.0439159	-1.40288e-13	-0.0420405	-6.23504e-14	-0.0404777	1.55876e-14	-0.0462915	-9.35257e-14	-0.0481981	-9.35257e-14	-0.053293	-7.79381e-14	-0.0556998	1.55876e-14	-0.0472604	-7.79381e-14	-0.0488545	-1.24701e-13	-0.0573564	-6.23504e-14
0.0901	-0.0438534	-6.23504e-14	-0.0422281	-4.67628e-14	-0.0403214	0	-0.0462915	-1.24701e-13	-0.0483857	-1.24701e-13	-0.053418	-7.79381e-14	-0.055731	-7.79381e-14	-0.0470729	1.55876e-14	-0.048917	-4.67628e-14	-0.0571689	-1.09113e-13
0.0902	-0.0440097	-1.09113e-13	-0.0421968	-3.11752e-14	-0.0403839	-1.09113e-13	-0.0462915	-1.71464e-13	-0.0482606	-3.11752e-14	-0.0531992	-7.79381e-14	-0.0556685	-9.35257e-14	-0.0471667	-1.55876e-13	-0.0488233	-7.79381e-14	-0.0571689	-1.09113e-13
0.0903	-0.0438222	-3.11752e-14	-0.0421968	-4.67628e-14	-0.0405715	-1.40288e-13	-0.0463852	-6.23504e-14	-0.0483232	-7.79381e-14	-0.053293	-1.40288e-13	-0.0557623	-6.23504e-14	-0.0472917	-9.35257e-14	-0.0489483	-7.79381e-14	-0.0572626	-6.23504e-14
0.0904	-0.0437284	-1.09113e-13	-0.0419468	-1.71464e-13	-0.0404777	-4.67628e-14	-0.046354	-3.11752e-14	-0.0482606	1.55876e-14	-0.0533243	3.11752e-14	-0.055731	-6.23504e-14	-0.0471979	-4.67628e-14	-0.0487608	-6.23504e-14	-0.0572626	-6.23504e-14
0.0905	-0.0436346	-9.35257e-14	-0.041978	-1.71464e-13	-0.0404777	-4.67628e-14	-0.046354	-1.55876e-13	-0.0483232	-1.55876e-13	-0.0533555	-4.67628e-14	-0.0556373	-4.67628e-14	-0.0471354	-1.24701e-13	-0.0488545	-1.40288e-13	-0.0572001	-7.79381e-14
0.0906	-0.0437597	-9.35257e-14	-0.041978	-9.35257e-14	-0.0404464	-9.35257e-14	-0.0463227	-1.09113e-13	-0.0481669	-4.67628e-14	-0.053418	-6.23504e-14	-0.0556998	-6.23504e-14	-0.0471354	-1.09113e-13	-0.0488233	-9.35257e-14	-0.0572314	-9.35257e-14
0.0907	-0.0438534	1.55876e-14	-0.0417592	-9.35257e-14	-0.0404152	-6.23504e-14	-0.0465103	1.55876e-14	-0.0483544	-7.79381e-14	-0.053293	-9.35257e-14	-0.0556685	-6.23504e-14	-0.0468228	-9.35257e-14	-0.0488545	-7.79381e-14	-0.0572314	-7.79381e-14
0.0908	-0.0438847	1.55876e-14	-0.0417592	-1.24701e-13	-0.0405089	-3.11752e-14	-0.0461664	-7.79381e-14	-0.0482606	-6.23504e-14	-0.0532305	-1.24701e-13	-0.0557623	-4.67628e-14	-0.0469166	-1.71464e-13	-0.0488858	-7.79381e-14	-0.0571376	-7.79381e-14
0.0909	-0.0437909	-7.79381e-14	-0.041853	-1.40288e-13	-0.0403214	-1.09113e-13	-0.0462602	-2.02639e-13	-0.0483857	-4.67628e-14	-0.053293	-4.67628e-14	-0.0557936	1.55876e-14	-0.0470104	-6.23504e-14	-0.048917	-7.79381e-14	-0.0568563	-2.02639e-13
0.091	-0.0437909	-1.40288e-13	-0.041853	-3.11752e-14	-0.0403214	-6.23504e-14	-0.0464165	-7.79381e-14	-0.0484482	0	-0.053293	-6.23504e-14	-0.055731	-3.11752e-14	-0.0469479	0	-0.0489483	-6.23504e-14	-0.0571376	-1.40288e-13
0.0911	-0.0439159	-9.35257e-14	-0.0418217	0	-0.0404464	-1.09113e-13	-0.0464165	1.55876e-14	-0.0484794	-7.79381e-14	-0.0533243	-1.09113e-13	-0.055731	-6.23504e-14	-0.0468853	-3.11752e-14	-0.0488545	-9.35257e-14	-0.0572626	6.23504e-14
0.0912	-0.0438847	0	-0.0418842	-7.79381e-14	-0.0405715	-3.11752e-14	-0.0461664	-9.35257e-14	-0.0485732	0	-0.053418	4.67628e-14	-0.0558561	-1.09113e-13	-0.0469479	-1.24701e-13	-0.0488545	-7.79381e-14	-0.0572626	1.55876e-14
0.0913	-0.0438222	-6.23504e-14	-0.0419468	-1.55876e-14	-0.0403527	0	-0.046479	-1.40288e-13	-0.048542	-6.23504e-14	-0.0534493	-6.23504e-14	-0.0559498	0	-0.0469166	-4.67628e-14	-0.0487295	-1.24701e-13	-0.0572314	-1.09113e-13
0.0914	-0.0438847	-7.79381e-14	-0.041853	-6.23504e-14	-0.0403839	-1.55876e-13	-0.0462915	-3.11752e-14	-0.0484482	-7.79381e-14	-0.0533868	-3.11752e-14	-0.055731	-9.35257e-14	-0.0469166	-1.24701e-13	-0.0486357	-1.71464e-13	-0.0572626	-3.11752e-14
0.0915	-0.0439472	-7.79381e-14	-0.0420405	-9.35257e-14	-0.0403527	-9.35257e-14	-0.046229	-1.71464e-13	-0.0483857	-1.24701e-13	-0.0533555	-6.23504e-14	-0.0556685	-1.09113e-13	-0.0471979	-6.23504e-14	-0.048792	-6.23504e-14	-0.0572001	-7.79381e-14
0.0916	-0.0437597	1.55876e-14	-0.041853	-7.79381e-14	-0.0404464	0	-0.0462915	-7.79381e-14	-0.0483857	-1.55876e-13	-0.0533868	-1.09113e-13	-0.0557623	-1.24701e-13	-0.0469479	-1.55876e-14	-0.048792	4.67628e-14	-0.0572001	-4.67628e-14
0.0917	-0.0438222	-1.55876e-13	-0.041853	-1.87051e-13	-0.0404777	1.55876e-14	-0.0462602	0	-0.0484169	-1.09113e-13	-0.0533868	-7.79381e-14	-0.0556998	-9.35257e-14	-0.0470416	-1.55876e-13	-0.0488545	1.55876e-14	-0.0572626	-6.23504e-14
0.0918	-0.0438222	-1.24701e-13	-0.0420405	-9.35257e-14	-0.0404464	-7.79381e-14	-0.0463227	-6.23504e-14	-0.0483232	-6.23504e-14	-0.053293	-3.11752e-14	-0.0554185	-9.35257e-14	-0.0468853	-7.79381e-14	-0.0490108	1.55876e-14	-0.0572626	-1.55876e-14
0.0919	-0.044041	-3.11752e-14	-0.041853	0	-0.0405089	-1.40288e-13	-0.0465103	-4.67628e-14	-0.0484169	-4.67628e-14	-0.0532618	-7.79381e-14	-0.0556373	-6.23504e-14	-0.0471667	-7.79381e-14	-0.0489796	-7.79381e-14	-0.0574502	-1.09113e-13
0.092	-0.0439159	1.55876e-14	-0.0419468	-1.40288e-13	-0.040634	-7.79381e-14	-0.0464477	-3.11752e-14	-0.0483544	-9.35257e-14	-0.0533868	-4.67628e-14	-0.0558248	0	-0.0471041	1.55876e-14	-0.0489796	-3.11752e-14	-0.0572626	-3.11752e-14
0.0921	-0.0438847	-1.55876e-13	-0.0418217	-6.23504e-14	-0.0404777	1.55876e-14	-0.0465415	-4.67628e-14	-0.0483232	-4.67628e-14	-0.053418	-7.79381e-14	-0.0557623	1.55876e-14	-0.0469479	-4.67628e-14	-0.0488233	-9.35257e-14	-0.0571376	-1.24701e-13
0.0922	-0.0438847	-7.79381e-14	-0.0419155	-1.09113e-13	-0.0405089	-9.35257e-14	-0.0465415	-6.23504e-14	-0.0484169	-6.23504e-14	-0.0533555	-6.23504e-14	-0.055731	-9.35257e-14	-0.0470104	-1.09113e-13	-0.0487608	-1.71464e-13	-0.0573877	-1.09113e-13
0.0923	-0.0441035	-4.67628e-14	-0.041853	-3.11752e-14	-0.0403527	-1.40288e-13	-0.0464165	-1.24701e-13	-0.0483857	0	-0.0533868	-3.11752e-14	-0.0557936	-9.35257e-14	-0.0470104	-1.09113e-13	-0.0487608	-1.40288e-13	-0.057669	0
0.0924	-0.0442285	-1.55876e-14	-0.0420093	-6.23504e-14	-0.040634	-1.40288e-13	-0.046354	-1.55876e-13	-0.0485107	-7.79381e-14	-0.0534493	-9.35257e-14	-0.0558873	-7.79381e-14	-0.0468228	-6.23504e-14	-0.048792	-3.11752e-14	-0.0573251	-3.11752e-14
0.0925	-0.0441347	-7.79381e-14	-0.0420093	-4.67628e-14	-0.0404464	-3.11752e-14	-0.0464477	-7.79381e-14	-0.0485732	-7.79381e-14	-0.0533243	-6.23504e-14	-0.0558873	-1.09113e-13	-0.0470416	-1.40288e-13	-0.0488233	-1.55876e-14	-0.0573564	-1.87051e-13
0.0926	-0.0440722	-1.55876e-13	-0.041853	-7.79381e-14	-0.0405715	-1.09113e-13	-0.046604	-6.23504e-14	-0.0486045	-3.11752e-14	-0.0533555	-1.55876e-13	-0.0555748	-7.79381e-14	-0.0471354	-3.11752e-14	-0.0487608	0	-0.0571689	-9.35257e-14
0.0927	-0.044291	-6.23504e-14	-0.0418842	-1.09113e-13	-0.0405089	-7.79381e-14	-0.046229	-6.23504e-14	-0.0486045	-7.79381e-14	-0.053418	-9.35257e-14	-0.0556998	-1.87051e-13	-0.0471041	-4.67628e-14	-0.0487608	-1.40288e-13	-0.0572001	-7.79381e-14
0.0928	-0.0440722	-4.67628e-14	-0.041853	-9.35257e-14	-0.0403527	-4.67628e-14	-0.0464165	-1.71464e-13	-0.0484794	-4.67628e-14	-0.0533243	-7.79381e-14	-0.055731	-4.67628e-14	-0.0471354	-7.79381e-14	-0.0488545	-1.09113e-13	-0.0572626	-3.11752e-14
0.0929	-0.0439785	-1.71464e-13	-0.0419468	-7.79381e-14	-0.0404464	-3.11752e-14	-0.0464165	-7.79381e-14	-0.0481981	-2.02639e-13	-0.0533243	-6.23504e-14	-0.0559498	-4.67628e-14	-0.0471041	-3.11752e-14	-0.048917	-1.55876e-14	-0.0572001	0
0.093	-0.044041	-2.33814e-13	-0.0418842	-4.67628e-14	-0.0405402	-6.23504e-14	-0.0463227	-3.11752e-14	-0.0483544	-1.24701e-13	-0.0532305	-1.40288e-13	-0.0557623	-4.67628e-14	-0.0471979	0	-0.0487608	-6.23504e-14	-0.0571376	-7.79381e-14
0.0931	-0.0439472	-6.23504e-14	-0.041853	0	-0.0404464	-6.23504e-14	-0.0462602	-9.35257e-14	-0.0485732	-4.67628e-14	-0.0531055	-1.09113e-13	-0.0558248	-1.24701e-13	-0.0470729	-6.23504e-14	-0.0488858	-1.24701e-13	-0.0571689	-1.09113e-13
0.0932	-0.0440722	-1.09113e-13	-0.0420718	-1.09113e-13	-0.0405715	-4.67628e-14	-0.046354	-6.23504e-14	-0.048542	-1.55876e-14	-0.0531992	-4.67628e-14	-0.055731	-4.67628e-14	-0.0471041	-1.40288e-13	-0.0488858	-3.11752e-14	-0.0573564	-1.09113e-13
0.0933	-0.0441035	-3.11752e-14	-0.0420093	-1.55876e-14	-0.0406027	-1.24701e-13	-0.0464165	-3.11752e-14	-0.0484169	-1.71464e-13	-0.0533243	-3.11752e-14	-0.0555748	-1.55876e-13	-0.0471667	0	-0.048792	-1.55876e-14	-0.0574814	3.11752e-14
0.0934	-0.0437597	-3.11752e-14	-0.0417592	-4.67628e-14	-0.0406027	-9.35257e-14	-0.046604	3.11752e-14	-0.0484794	-9.35257e-14	-0.0533555	1.55876e-14	-0.055606	-1.40288e-13	-0.0470416	-1.09113e-13	-0.0488545	-1.40288e-13	-0.0573251	0
0.0935	-0.044041	-2.02639e-13	-0.0419468	-1.71464e-13	-0.0406027	-4.67628e-14	-0.0465728	-3.11752e-14	-0.0484169	-4.67628e-14	-0.0532618	-3.11752e-14	-0.0556685	-9.35257e-14	-0.0470729	-3.11752e-14	-0.0488233	-6.23504e-14	-0.0573251	-1.55876e-13
0.0936	-0.0441347	0	-0.0418842	0	-0.0404777	-4.67628e-14	-0.0466665	-6.23504e-14	-0.0486045	-4.67628e-14	-0.0533243	-9.35257e-14	-0.0556998	-6.23504e-14	-0.0470416	-7.79381e-14	-0.0488545	-4.67628e-14	-0.0571689	-1.40288e-13
0.0937	-0.0438534	0	-0.041853	-6.23504e-14	-0.0405715	-2.18227e-13	-0.046604	-1.09113e-13	-0.0486357	-9.35257e-14	-0.053293	-9.35257e-14	-0.0557623	0	-0.0469479	-1.24701e-13	-0.0491984	-9.35257e-14	-0.0571064	-4.67628e-14
0.0938	-0.0441347	-1.55876e-13	-0.041978	-7.79381e-14	-0.0405402	-4.67628e-14	-0.0465728	-1.09113e-13	-0.0484169	-4.67628e-14	-0.0533243	-7.79381e-14	-0.0558248	-9.35257e-14	-0.0470729	-1.09113e-13	-0.048917	1.55876e-14	-0.0572314	-7.79381e-14
0.0939	-0.0439472	-4.67628e-14	-0.041853	-7.79381e-14	-0.0405402	-1.24701e-13	-0.0465103	-7.79381e-14	-0.0486357	-1.55876e-13	-0.0533555	-9.35257e-14	-0.0558248	1.55876e-14	-0.0471354	0	-0.0491358	-1.09113e-13	-0.0572626	-6.23504e-14
0.094	-0.044041	-4.67628e-14	-0.0419155	-1.55876e-13	-0.0405089	-7.79381e-14	-0.046604	-7.79381e-14	-0.0484482	-9.35257e-14	-0.0533243	-9.35257e-14	-0.0556685	-3.11752e-14	-0.0471979	1.55876e-14	-0.0490421	-1.09113e-13	-0.0570751	-1.09113e-13
0.0941	-0.0440097	-6.23504e-14	-0.0418842	-4.67628e-14	-0.040634	-9.35257e-14	-0.0464165	-4.67628e-14	-0.0486045	-9.35257e-14	-0.0532618	-9.35257e-14	-0.055731	-1.09113e-13	-0.0470416	-6.23504e-14	-0.0489796	-1.40288e-13	-0.0571376	-7.79381e-14
0.0942	-0.0441035	-9.35257e-14	-0.0416967	-4.67628e-14	-0.0405089	-4.67628e-14	-0.0463227	-1.71464e-13	-0.0486357	0	-0.0530742	-7.79381e-14	-0.0556685	-1.09113e-13	-0.0469166	-9.35257e-14	-0.0488858	-9.35257e-14	-0.0572001	-9.35257e-14
0.0943	-0.0440097	-7.79381e-14	-0.0416342	-1.24701e-13	-0.0406027	-7.79381e-14	-0.0465415	-7.79381e-14	-0.0485107	-1.55876e-14	-0.053168	-1.24701e-13	-0.0557623	-4.67628e-14	-0.0471979	0	-0.0490108	0	-0.0570438	-1.55876e-14
0.0944	-0.0439472	-6.23504e-14	-0.0416967	-1.40288e-13	-0.0407277	-1.55876e-14	-0.0466353	4.67628e-14	-0.0483232	-1.24701e-13	-0.0532618	-3.11752e-14	-0.0558248	-3.11752e-14	-0.0471667	-6.23504e-14	-0.0488233	-1.09113e-13	-0.0570751	-1.55876e-13
0.0945	-0.0440097	-1.24701e-13	-0.0417905	-1.55876e-14	-0.0405715	-7.79381e-14	-0.0464165	-1.24701e-13	-0.0483857	-1.55876e-13	-0.053168	-4.67628e-14	-0.0558248	-3.11752e-14	-0.0471041	0	-0.0488858	-1.71464e-13	-0.0572001	-6.23504e-14
0.0946	-0.0441347	-6.23504e-14	-0.0418217	-6.23504e-14	-0.0406027	-7.79381e-14	-0.0466353	-6.23504e-14	-0.0483232	-3.11752e-14	-0.053168	-1.24701e-13	-0.0557936	-1.09113e-13	-0.0471354	-6.23504e-14	-0.0488545	0	-0.0572314	1.55876e-14
0.0947	-0.0441347	3.11752e-14	-0.041728	-9.35257e-14	-0.0404464	-9.35257e-14	-0.0466978	-4.67628e-14	-0.0484169	-1.09113e-13	-0.053418	-4.67628e-14	-0.0557623	-9.35257e-14	-0.0472292	-7.79381e-14	-0.0488545	-4.67628e-14	-0.0572626	-1.09113e-13
0.0948	-0.0441347	-7.79381e-14	-0.0416029	-4.67628e-14	-0.040634	-1.24701e-13	-0.0466665	-1.24701e-13	-0.0483544	-1.55876e-14	-0.0533243	0	-0.0557623	-9.35257e-14	-0.0472917	-3.11752e-14	-0.0487608	-1.40288e-13	-0.0571689	-7.79381e-14
0.0949	-0.044041	-4.67628e-14	-0.0416967	-9.35257e-14	-0.0404464	-7.79381e-14	-0.0466665	-1.09113e-13	-0.048542	-7.79381e-14	-0.0532618	-4.67628e-14	-0.0557623	-6.23504e-14	-0.0472917	1.55876e-14	-0.0489483	-6.23504e-14	-0.0572939	-1.09113e-13
0.095	-0.0438534	-1.87051e-13	-0.0417592	-3.11752e-14	-0.0403839	-1.09113e-13	-0.046604	-6.23504e-14	-0.0485107	-4.67628e-14	-0.0531367	-1.71464e-13	-0.0559498	1.55876e-14	-0.0472604	-9.35257e-14	-0.0488233	0	-0.0571376	0
0.0951	-0.0437909	-1.55876e-13	-0.041728	-4.67628e-14	-0.0405402	-1.40288e-13	-0.0465728	-9.35257e-14	-0.0483857	-1.09113e-13	-0.0531992	-7.79381e-14	-0.0560436	-4.67628e-14	-0.0470729	-1.40288e-13	-0.0489483	-7.79381e-14	-0.0572626	-1.09113e-13
0.0952	-0.0440722	-9.35257e-14	-0.0417905	-4.67628e-14	-0.0405715	1.55876e-14	-0.0465728	-1.24701e-13	-0.0483544	-6.23504e-14	-0.0533555	-6.23504e-14	-0.0559498	-1.09113e-13	-0.0471979	-1.71464e-13	-0.048917	-9.35257e-14	-0.0572001	-1.09113e-13
0.0953	-0.0439159	7.79381e-14	-0.041728	-7.79381e-14	-0.0403839	-6.23504e-14	-0.0465728	0	-0.0484482	-7.79381e-14	-0.0533243	-6.23504e-14	-0.0560124	-1.40288e-13	-0.0472604	-7.79381e-14	-0.0488545	-1.24701e-13	-0.0573251	-1.24701e-13
0.0954	-0.0438847	-7.79381e-14	-0.0414779	-1.24701e-13	-0.0404464	-7.79381e-14	-0.0466665	-6.23504e-14	-0.0483857	-3.11752e-14	-0.053293	-7.79381e-14	-0.0558561	-1.24701e-13	-0.0472917	-3.11752e-14	-0.0487608	-1.40288e-13	-0.0572001	-4.67628e-14
0.0955	-0.0439159	-6.23504e-14	-0.0418217	-9.35257e-14	-0.0406652	-9.35257e-14	-0.0465415	-7.79381e-14	-0.0481669	-1.09113e-13	-0.0535118	-9.35257e-14	-0.055731	-1.24701e-13	-0.0473229	-1.09113e-13	-0.0488858	-1.09113e-13	-0.0573251	-4.67628e-14
0.0956	-0.0436971	-1.24701e-13	-0.0417905	1.55876e-14	-0.040634	-4.67628e-14	-0.0465103	-1.40288e-13	-0.0483544	-1.40288e-13	-0.0532618	-4.67628e-14	-0.0558561	-9.35257e-14	-0.0471979	-9.35257e-14	-0.0488233	-4.67628e-14	-0.0572939	-7.79381e-14
0.0957	-0.0437597	-6.23504e-14	-0.041853	0	-0.0406027	-6.23504e-14	-0.0466353	-6.23504e-14	-0.0484169	0	-0.0533243	-6.23504e-14	-0.0560749	0	-0.0471979	-1.40288e-13	-0.0488233	-7.79381e-14	-0.0574814	-1.09113e-13
0.0958	-0.0438534	-4.67628e-14	-0.041728	-7.79381e-14	-0.040634	-1.24701e-13	-0.0463852	-9.35257e-14	-0.0484169	-3.11752e-14	-0.0533868	-1.09113e-13	-0.0560124	-6.23504e-14	-0.0472604	-1.09113e-13	-0.0488858	-9.35257e-14	-0.0573564	-6.23504e-14
0.0959	-0.0437284	-4.67628e-14	-0.0417905	-1.24701e-13	-0.0403839	-7.79381e-14	-0.0464477	-6.23504e-14	-0.0483544	0	-0.053293	0	-0.0561686	-7.79381e-14	-0.0472604	-7.79381e-14	-0.0487608	-1.24701e-13	-0.0574189	-1.24701e-13
0.096	-0.0437909	-1.40288e-13	-0.0417592	-3.11752e-14	-0.0404464	-1.55876e-13	-0.0465103	-6.23504e-14	-0.0482919	-1.24701e-13	-0.0533868	-6.23504e-14	-0.0558248	-9.35257e-14	-0.0471354	-6.23504e-14	-0.0486045	-1.09113e-13	-0.0574189	-6.23504e-14
0.0961	-0.0435096	-6.23504e-14	-0.0418217	-1.09113e-13	-0.0404464	-9.35257e-14	-0.0465415	-1.55876e-14	-0.0482919	-1.24701e-13	-0.053418	-1.24701e-13	-0.0559186	-1.71464e-13	-0.0473542	-1.09113e-13	-0.0487608	-6.23504e-14	-0.0573877	-7.79381e-14
0.0962	-0.0436346	-1.55876e-13	-0.0416967	-6.23504e-14	-0.0406027	-3.11752e-14	-0.0465103	-6.23504e-14	-0.0483232	-6.23504e-14	-0.053418	-6.23504e-14	-0.0559498	-7.79381e-14	-0.0472604	-4.67628e-14	-0.0486982	1.55876e-14	-0.0573877	-6.23504e-14
0.0963	-0.0439472	1.55876e-14	-0.0416654	-1.09113e-13	-0.040634	-3.11752e-14	-0.0465728	-6.23504e-14	-0.0482919	0	-0.0533555	-7.79381e-14	-0.0556373	-4.67628e-14	-0.0473855	-1.24701e-13	-0.048667	-1.09113e-13	-0.0573564	-9.35257e-14
0.0964	-0.0439472	3.11752e-14	-0.0417905	-3.11752e-14	-0.0406027	-7.79381e-14	-0.0466353	-3.11752e-14	-0.0484169	-7.79381e-14	-0.0534493	-1.24701e-13	-0.055606	-1.87051e-13	-0.0474792	0	-0.0487295	-6.23504e-14	-0.0572001	-6.23504e-14
0.0965	-0.0436034	-1.24701e-13	-0.0416967	-9.35257e-14	-0.0407277	0	-0.0465415	-7.79381e-14	-0.0483544	-1.55876e-14	-0.0533243	-1.09113e-13	-0.0558873	-6.23504e-14	-0.0474792	-7.79381e-14	-0.0487295	-1.09113e-13	-0.0573564	-1.09113e-13
0.0966	-0.0437909	-1.55876e-13	-0.0418842	-4.67628e-14	-0.0407277	0	-0.0465728	-1.24701e-13	-0.0483232	-4.67628e-14	-0.0535118	-1.24701e-13	-0.0557936	6.23504e-14	-0.0473855	-1.09113e-13	-0.0488233	-9.35257e-14	-0.0575127	0
0.0967	-0.0437597	0	-0.0419155	-4.67628e-14	-0.0406652	-7.79381e-14	-0.0466353	-3.11752e-14	-0.0482606	-6.23504e-14	-0.0535743	0	-0.0560124	-6.23504e-14	-0.0475417	-1.24701e-13	-0.0488858	-1.09113e-13	-0.0573564	-3.11752e-14
0.0968	-0.0437909	-4.67628e-14	-0.0416967	-6.23504e-14	-0.0405089	-1.09113e-13	-0.0463852	-4.67628e-14	-0.0484794	-6.23504e-14	-0.0535431	-6.23504e-14	-0.0558561	-3.11752e-14	-0.0475417	3.11752e-14	-0.0488233	-4.67628e-14	-0.0572314	-1.40288e-13
0.0969	-0.0437909	-9.35257e-14	-0.0416342	-1.71464e-13	-0.040634	-1.09113e-13	-0.0466353	-6.23504e-14	-0.0484482	4.67628e-14	-0.0533868	-1.55876e-13	-0.0556998	-1.87051e-13	-0.0475417	-9.35257e-14	-0.0487608	-3.11752e-14	-0.0575127	-1.09113e-13
0.097	-0.0438222	-9.35257e-14	-0.0416342	-1.55876e-13	-0.0406965	-7.79381e-14	-0.0465728	-7.79381e-14	-0.0483857	-9.35257e-14	-0.0534493	-1.55876e-13	-0.0557623	-9.35257e-14	-0.0476355	-6.23504e-14	-0.0487295	-1.55876e-13	-0.0575439	3.11752e-14
0.0971	-0.0438847	-3.11752e-14	-0.0416654	-9.35257e-14	-0.040759	1.55876e-14	-0.0465415	-1.09113e-13	-0.0485107	-7.79381e-14	-0.0533868	-6.23504e-14	-0.0557936	0	-0.0474792	0	-0.048792	-1.09113e-13	-0.0575127	-6.23504e-14
0.0972	-0.0439159	1.55876e-14	-0.0417592	-4.67628e-14	-0.0406027	-6.23504e-14	-0.0465415	-6.23504e-14	-0.0486357	0	-0.0533243	-6.23504e-14	-0.0556998	-3.11752e-14	-0.047448	-1.71464e-13	-0.048917	-4.67628e-14	-0.0576065	-1.40288e-13
0.0973	-0.0440722	-6.23504e-14	-0.0418842	-1.55876e-14	-0.0407277	-1.24701e-13	-0.0464165	-6.23504e-14	-0.0486357	-3.11752e-14	-0.053293	-1.24701e-13	-0.0558248	-7.79381e-14	-0.0473542	-9.35257e-14	-0.0489483	-3.11752e-14	-0.0573564	-1.09113e-13
0.0974	-0.0441035	1.55876e-14	-0.0418217	0	-0.0406027	-9.35257e-14	-0.046604	-1.09113e-13	-0.0486357	-4.67628e-14	-0.0533868	-9.35257e-14	-0.0560124	-3.11752e-14	-0.0474167	-1.40288e-13	-0.048917	-3.11752e-14	-0.0572939	-1.87051e-13
0.0975	-0.0438222	-1.87051e-13	-0.0417592	-1.40288e-13	-0.0406965	-7.79381e-14	-0.0466353	0	-0.0485732	-9.35257e-14	-0.053293	-4.67628e-14	-0.0558873	1.55876e-14	-0.0474167	-6.23504e-14	-0.0488233	-1.09113e-13	-0.0573877	-6.23504e-14
0.0976	-0.0438222	-1.71464e-13	-0.0418842	-3.11752e-14	-0.0406965	-3.11752e-14	-0.0465728	-9.35257e-14	-0.0486045	-1.24701e-13	-0.053293	-9.35257e-14	-0.0559186	-1.24701e-13	-0.0473855	1.55876e-14	-0.048792	-7.79381e-14	-0.0575439	0
0.0977	-0.0438534	-7.79381e-14	-0.0417905	-9.35257e-14	-0.0406027	-4.67628e-14	-0.0465103	-1.09113e-13	-0.048792	-9.35257e-14	-0.053293	-1.24701e-13	-0.0560124	-7.79381e-14	-0.0472604	-1.24701e-13	-0.0487608	-7.79381e-14	-0.0573564	-4.67628e-14
0.0978	-0.0438222	-7.79381e-14	-0.0417592	-9.35257e-14	-0.0405715	-1.24701e-13	-0.0466978	-7.79381e-14	-0.0485732	-3.11752e-14	-0.0531992	-4.67628e-14	-0.0558873	-4.67628e-14	-0.0472917	-7.79381e-14	-0.0487295	-1.55876e-13	-0.0574189	-1.24701e-13
0.0979	-0.0438222	-9.35257e-14	-0.0417592	-6.23504e-14	-0.040634	-1.24701e-13	-0.0466665	-1.55876e-14	-0.0485732	-4.67628e-14	-0.0531992	-6.23504e-14	-0.0558873	-1.09113e-13	-0.0473855	-3.11752e-14	-0.0485732	-6.23504e-14	-0.0573877	-7.79381e-14
0.098	-0.0438847	-1.24701e-13	-0.0416654	-1.24701e-13	-0.040634	-7.79381e-14	-0.0466978	-9.35257e-14	-0.0485107	-6.23504e-14	-0.0533243	-4.67628e-14	-0.0560749	-9.35257e-14	-0.0474792	-1.55876e-14	-0.048667	-1.24701e-13	-0.0574189	-7.79381e-14
0.0981	-0.0437597	-3.11752e-14	-0.0418217	-1.09113e-13	-0.0406027	-7.79381e-14	-0.0466665	-1.24701e-13	-0.0486045	-9.35257e-14	-0.0532305	-3.11752e-14	-0.0560749	-4.67628e-14	-0.0473542	0	-0.0488858	-4.67628e-14	-0.0575127	-6.23504e-14
0.0982	-0.0439472	-1.09113e-13	-0.0417905	3.11752e-14	-0.040634	-9.35257e-14	-0.046479	-6.23504e-14	-0.0485107	-9.35257e-14	-0.0532618	-6.23504e-14	-0.0560436	0	-0.0474792	-1.09113e-13	-0.0487295	3.11752e-14	-0.0575439	-7.79381e-14
0.0983	-0.0439159	3.11752e-14	-0.0418842	-7.79381e-14	-0.0406652	-7.79381e-14	-0.0466353	-9.35257e-14	-0.0488545	1.55876e-14	-0.0531992	-4.67628e-14	-0.0560124	-9.35257e-14	-0.047573	-4.67628e-14	-0.0487608	-9.35257e-14	-0.0574502	-9.35257e-14
0.0984	-0.0438534	-6.23504e-14	-0.0417905	-6.23504e-14	-0.040634	-6.23504e-14	-0.0466665	0	-0.0486357	1.55876e-14	-0.0533555	-3.11752e-14	-0.0560124	-1.09113e-13	-0.0475417	0	-0.048792	-1.24701e-13	-0.0573564	-7.79381e-14
0.0985	-0.0439472	-7.79381e-14	-0.041728	-1.40288e-13	-0.0405715	-9.35257e-14	-0.0465415	-7.79381e-14	-0.0485732	-1.40288e-13	-0.0532618	-6.23504e-14	-0.0561686	1.55876e-14	-0.0476355	-1.09113e-13	-0.0486982	-4.67628e-14	-0.0577002	-9.35257e-14
0.0986	-0.0437284	-6.23504e-14	-0.041728	-1.55876e-13	-0.0406027	-1.40288e-13	-0.046604	-7.79381e-14	-0.048667	-1.24701e-13	-0.0533868	-7.79381e-14	-0.0561686	-7.79381e-14	-0.047698	0	-0.0487295	0	-0.0574814	-1.55876e-14
0.0987	-0.0439472	-1.24701e-13	-0.0415404	-7.79381e-14	-0.0409465	0	-0.0466353	-4.67628e-14	-0.0487295	-9.35257e-14	-0.053293	-7.79381e-14	-0.0559498	-7.79381e-14	-0.0475417	-1.24701e-13	-0.0487608	-4.67628e-14	-0.0574502	-1.24701e-13
0.0988	-0.0438847	-3.11752e-14	-0.0416342	-9.35257e-14	-0.0407903	0	-0.0466665	-1.24701e-13	-0.0485732	-1.09113e-13	-0.0532305	-1.24701e-13	-0.0560124	-1.24701e-13	-0.0475105	-9.35257e-14	-0.0488233	-1.09113e-13	-0.0574189	-6.23504e-14
0.0989	-0.0438534	-1.71464e-13	-0.0416967	3.11752e-14	-0.0408215	-1.40288e-13	-0.0466665	-7.79381e-14	-0.0484169	-9.35257e-14	-0.0532618	-1.09113e-13	-0.0561374	-1.55876e-14	-0.0476355	-1.55876e-14	-0.0487295	-7.79381e-14	-0.0572626	-6.23504e-14
0.099	-0.0440097	-7.79381e-14	-0.041728	-7.79381e-14	-0.0408215	-6.23504e-14	-0.0465103	-4.67628e-14	-0.0485732	-1.55876e-13	-0.0533243	-1.09113e-13	-0.0560124	-1.55876e-14	-0.0476668	-7.79381e-14	-0.0488858	-6.23504e-14	-0.0573251	-1.24701e-13
0.0991	-0.0437284	-7.79381e-14	-0.0418217	1.55876e-14	-0.0407903	-7.79381e-14	-0.0466353	-9.35257e-14	-0.0484169	-7.79381e-14	-0.053418	1.55876e-14	-0.0559186	-1.24701e-13	-0.0476355	-7.79381e-14	-0.0487295	-3.11752e-14	-0.0576377	0
0.0992	-0.0437284	-1.24701e-13	-0.0415717	-9.35257e-14	-0.040884	-7.79381e-14	-0.0467603	-1.55876e-14	-0.0487295	-7.79381e-14	-0.0532618	-1.40288e-13	-0.0561686	-7.79381e-14	-0.0476668	-7.79381e-14	-0.048917	-1.09113e-13	-0.0574502	4.67628e-14
0.0993	-0.0438534	-1.24701e-13	-0.0417592	-1.09113e-13	-0.0408528	-4.67628e-14	-0.0466978	-3.11752e-14	-0.048667	-1.55876e-14	-0.0531367	-1.09113e-13	-0.0560124	0	-0.0476355	-9.35257e-14	-0.048917	-3.11752e-14	-0.0575439	-7.79381e-14
0.0994	-0.0439785	-7.79381e-14	-0.0417592	-7.79381e-14	-0.040759	-1.24701e-13	-0.0465728	-1.40288e-13	-0.0486982	-9.35257e-14	-0.0532618	-1.09113e-13	-0.0559811	-9.35257e-14	-0.0478543	-1.09113e-13	-0.0490108	-9.35257e-14	-0.0573877	-1.09113e-13
0.0995	-0.0437284	-7.79381e-14	-0.0417592	-6.23504e-14	-0.040884	-1.09113e-13	-0.0466353	-1.40288e-13	-0.0487608	-4.67628e-14	-0.0533555	-6.23504e-14	-0.0559498	-1.24701e-13	-0.0478543	-3.11752e-14	-0.0489483	-3.11752e-14	-0.0572626	-2.18227e-13
0.0996	-0.0437597	-1.24701e-13	-0.0416967	-1.55876e-13	-0.0406652	-7.79381e-14	-0.0466353	-7.79381e-14	-0.0487295	-1.09113e-13	-0.0532618	1.55876e-14	-0.0558561	-4.67628e-14	-0.0477918	-3.11752e-14	-0.0492609	0	-0.0575439	-4.67628e-14
0.0997	-0.0438222	-3.11752e-14	-0.0418842	-6.23504e-14	-0.0407903	-7.79381e-14	-0.046604	-4.67628e-14	-0.0485732	-7.79381e-14	-0.053168	-1.24701e-13	-0.0560436	-6.23504e-14	-0.0476355	-1.71464e-13	-0.0491984	0	-0.0573877	-4.67628e-14
0.0998	-0.0438222	-9.35257e-14	-0.041728	-4.67628e-14	-0.0407277	0	-0.0465728	-4.67628e-14	-0.0486357	-1.71464e-13	-0.0531992	-1.55876e-13	-0.0558873	-3.11752e-14	-0.0475417	-1.71464e-13	-0.0491671	-6.23504e-14	-0.0574189	-6.23504e-14
0.0999	-0.0436971	-4.67628e-14	-0.0416029	-1.40288e-13	-0.0406965	-1.55876e-13	-0.0465103	-1.24701e-13	-0.0487295	-7.79381e-14	-0.0531992	-4.67628e-14	-0.055731	-1.55876e-13	-0.0477605	-6.23504e-14	-0.0491358	-2.02639e-13	-0.0573564	-1.09113e-13
0.1	-0.0437597	-1.09113e-13	-0.0416654	-7.79381e-14	-0.0408215	-6.23504e-14	-0.046479	-9.35257e-14	-0.0485107	-1.55876e-14	-0.0532618	1.55876e-14	-0.0558248	-1.40288e-13	-0.0475105	-3.11752e-14	-0.0491046	-7.79381e-14	-0.0573564	-1.40288e-13
0.1001	-0.0436346	-7.79381e-14	-0.0419155	-6.23504e-14	-0.0408528	-4.67628e-14	-0.0465415	-3.11752e-14	-0.048667	-9.35257e-14	-0.0532305	-7.79381e-14	-0.0559811	0	-0.0475417	-1.24701e-13	-0.0492296	-9.35257e-14	-0.0572314	-1.40288e-13
0.1002	-0.0437284	-7.79381e-14	-0.0416967	0	-0.040759	-6.23504e-14	-0.0464477	-7.79381e-14	-0.048542	-4.67628e-14	-0.0534806	-4.67628e-14	-0.0560124	-1.55876e-14	-0.0476668	-7.79381e-14	-0.0491671	-9.35257e-14	-0.0573877	-1.24701e-13
0.1003	-0.0438222	-6.23504e-14	-0.0418217	-9.35257e-14	-0.0407903	-4.67628e-14	-0.046479	-4.67628e-14	-0.048542	-6.23504e-14	-0.0533243	-3.11752e-14	-0.0560124	-6.23504e-14	-0.0474792	-6.23504e-14	-0.0492609	-1.40288e-13	-0.0572939	-3.11752e-14
0.1004	-0.0436971	-6.23504e-14	-0.0416342	-9.35257e-14	-0.040759	-4.67628e-14	-0.0464477	-6.23504e-14	-0.0485732	-9.35257e-14	-0.053293	-6.23504e-14	-0.0559186	-1.24701e-13	-0.0475105	-7.79381e-14	-0.0491671	-9.35257e-14	-0.0574814	0
0.1005	-0.0437597	-7.79381e-14	-0.0417592	-1.71464e-13	-0.0408215	-3.11752e-14	-0.0464477	-7.79381e-14	-0.0484482	-9.35257e-14	-0.0533243	-9.35257e-14	-0.0558561	-1.24701e-13	-0.0477293	-1.24701e-13	-0.0490733	-1.40288e-13	-0.0573564	-4.67628e-14
0.1006	-0.0436034	-6.23504e-14	-0.041728	-3.11752e-14	-0.0407903	-7.79381e-14	-0.046354	-4.67628e-14	-0.0485732	-1.09113e-13	-0.053293	-7.79381e-14	-0.0558873	-4.67628e-14	-0.0477293	-3.11752e-14	-0.0492921	-1.09113e-13	-0.0573251	-7.79381e-14
0.1007	-0.0434471	-1.09113e-13	-0.0416654	-7.79381e-14	-0.0407903	-1.24701e-13	-0.0464477	-4.67628e-14	-0.0487295	3.11752e-14	-0.0531055	-1.24701e-13	-0.0558873	-7.79381e-14	-0.0477605	0	-0.0492921	3.11752e-14	-0.0572626	-6.23504e-14
0.1008	-0.0434783	-1.09113e-13	-0.0415717	-7.79381e-14	-0.040884	-7.79381e-14	-0.046479	-6.23504e-14	-0.0486045	1.55876e-14	-0.0531055	-6.23504e-14	-0.0561061	-3.11752e-14	-0.0477293	-1.24701e-13	-0.0491984	-9.35257e-14	-0.0575127	-4.67628e-14
0.1009	-0.0433533	-6.23504e-14	-0.0418217	-7.79381e-14	-0.0407277	0	-0.0464477	-7.79381e-14	-0.0485732	-1.09113e-13	-0.0532305	-6.23504e-14	-0.0559498	-6.23504e-14	-0.0476668	-1.24701e-13	-0.0491358	-1.40288e-13	-0.0573564	-6.23504e-14
0.101	-0.0436659	-6.23504e-14	-0.0416342	-4.67628e-14	-0.0409465	-1.09113e-13	-0.046479	-6.23504e-14	-0.0485107	-6.23504e-14	-0.0532305	-6.23504e-14	-0.0558873	-1.24701e-13	-0.0477605	-4.67628e-14	-0.0491046	-7.79381e-14	-0.0573251	-9.35257e-14
0.1011	-0.0437597	3.11752e-14	-0.0416967	-7.79381e-14	-0.0408215	-6.23504e-14	-0.0468228	-6.23504e-14	-0.048667	-9.35257e-14	-0.0530117	-9.35257e-14	-0.0559186	-9.35257e-14	-0.0477605	-1.09113e-13	-0.0491671	-7.79381e-14	-0.0573564	-1.24701e-13
0.1012	-0.0437909	3.11752e-14	-0.041728	-6.23504e-14	-0.0408215	-7.79381e-14	-0.0466353	1.55876e-14	-0.0485107	-7.79381e-14	-0.053168	-1.09113e-13	-0.0558873	-7.79381e-14	-0.0475105	-1.55876e-13	-0.0492296	-6.23504e-14	-0.0572001	-3.11752e-14
0.1013	-0.0436346	-6.23504e-14	-0.0416967	-6.23504e-14	-0.0410403	-7.79381e-14	-0.0465728	-2.02639e-13	-0.0485732	-1.55876e-13	-0.0531055	-1.55876e-14	-0.0559811	-3.11752e-14	-0.0477605	-1.09113e-13	-0.0490421	-3.11752e-14	-0.0574502	-9.35257e-14
0.1014	-0.0437597	-9.35257e-14	-0.0417592	-3.11752e-14	-0.0407903	1.55876e-14	-0.0466353	-1.55876e-13	-0.048542	-1.40288e-13	-0.0531367	-1.55876e-14	-0.0561999	6.23504e-14	-0.0476355	-3.11752e-14	-0.0491046	-1.71464e-13	-0.0572939	-4.67628e-14
0.1015	-0.0436971	0	-0.0416967	-1.09113e-13	-0.0409153	-1.09113e-13	-0.0468541	0	-0.0484794	-4.67628e-14	-0.053168	-1.09113e-13	-0.0560436	-3.11752e-14	-0.047573	-6.23504e-14	-0.0491046	-7.79381e-14	-0.0573564	-9.35257e-14
0.1016	-0.0435721	-6.23504e-14	-0.0415717	-1.09113e-13	-0.0408528	-6.23504e-14	-0.0465103	-3.11752e-14	-0.0485107	-6.23504e-14	-0.053168	-1.40288e-13	-0.0560436	-1.24701e-13	-0.0477918	-6.23504e-14	-0.0490108	-9.35257e-14	-0.0571064	-1.87051e-13
0.1017	-0.0436971	-6.23504e-14	-0.0416342	-6.23504e-14	-0.0408528	-7.79381e-14	-0.0465728	-2.02639e-13	-0.0483544	-1.09113e-13	-0.0531992	-6.23504e-14	-0.0559186	-9.35257e-14	-0.0477605	-4.67628e-14	-0.0490421	-7.79381e-14	-0.0572939	-7.79381e-14
0.1018	-0.0438222	-7.79381e-14	-0.0417905	-7.79381e-14	-0.0407903	-1.09113e-13	-0.046604	-1.09113e-13	-0.0483544	-7.79381e-14	-0.0532618	-3.11752e-14	-0.0560124	-1.40288e-13	-0.047573	-1.09113e-13	-0.0490421	-7.79381e-14	-0.0572001	-6.23504e-14
0.1019	-0.0437597	1.55876e-14	-0.0418217	-4.67628e-14	-0.0406965	-6.23504e-14	-0.0464165	-9.35257e-14	-0.0484169	-6.23504e-14	-0.0532305	-7.79381e-14	-0.0558873	-3.11752e-14	-0.0475417	-1.55876e-13	-0.048917	-3.11752e-14	-0.0574189	0
0.102	-0.0436346	-9.35257e-14	-0.0419155	-6.23504e-14	-0.0406965	-7.79381e-14	-0.0463852	-1.09113e-13	-0.0483857	3.11752e-14	-0.0531055	-7.79381e-14	-0.0559498	-6.23504e-14	-0.0476668	-1.55876e-14	-0.048917	-1.09113e-13	-0.0574502	1.09113e-13
0.1021	-0.0436034	-1.71464e-13	-0.0418217	-4.67628e-14	-0.0406965	-9.35257e-14	-0.0465415	1.55876e-14	-0.048542	-7.79381e-14	-0.0531055	-9.35257e-14	-0.0558248	-7.79381e-14	-0.0476043	-3.11752e-14	-0.048917	-1.24701e-13	-0.0573251	-9.35257e-14
0.1022	-0.0437284	-7.79381e-14	-0.0416029	-1.09113e-13	-0.0406027	-7.79381e-14	-0.046604	-3.11752e-14	-0.0484482	-7.79381e-14	-0.0530742	-1.09113e-13	-0.0558248	-2.18227e-13	-0.0476355	-1.55876e-14	-0.0490733	0	-0.0572939	-7.79381e-14
0.1023	-0.0437284	1.55876e-14	-0.0416342	-1.40288e-13	-0.0406965	-4.67628e-14	-0.0465728	-6.23504e-14	-0.0484169	-1.09113e-13	-0.0529804	0	-0.0559498	0	-0.047698	-1.40288e-13	-0.0490733	3.11752e-14	-0.0575439	3.11752e-14
0.1024	-0.0438534	-1.40288e-13	-0.0416654	-9.35257e-14	-0.0405089	1.55876e-14	-0.046479	-6.23504e-14	-0.0485107	-3.11752e-14	-0.0531055	-9.35257e-14	-0.0557623	-7.79381e-14	-0.0476043	-1.24701e-13	-0.0491671	-6.23504e-14	-0.0574502	-6.23504e-14
0.1025	-0.0436346	-6.23504e-14	-0.0416654	-4.67628e-14	-0.040634	-7.79381e-14	-0.0466665	-1.55876e-14	-0.0487295	-6.23504e-14	-0.0531367	1.55876e-14	-0.0559811	-6.23504e-14	-0.0476355	-7.79381e-14	-0.0491358	-4.67628e-14	-0.0574814	-6.23504e-14
[truncated: 108,974 more rows]

## Sheet: Figure 6M
Resting potential	Threshold	Peak amplitude	AHP
-57.6	-23.3	30.6	-44.7
-57.4	-17.5	22.9	-33.1
-44.1	-24.7	19	-34.5
-45.7	-24	33.5	-35.7
-40	-27.3	25.4	-44.4
