# Supplementary material for: All-optical closed-loop voltage clamp for precise control of muscles and neurons in live animals
Source: Research Square preprint supplement (doi:10.21203/rs.3.rs-1505565/v1), 2023-03-29
Supplement: Supplementary file 11 [file a0aed1bd0d6fadea98dfb7e4.xlsx]

## Sheet: Figure 4C
Title: 14 Date: 2020/04/28 13:43
Parameters for step (1): Holding dF/F0: 0,0 % Tolerance range: -1,0 - 1,0 % Exposure time: 10 ms Binning: 4x4
Parameters for step (2): Holding dF/F0: -5,0 % Tolerance range: -6,0 - -4,0 %
Parameters for step (3): Holding dF/F0: 5,0 % Tolerance range: 4,0 - 6,0 %
Bleaching correction function: exp, offset = 3830,25 * exp(-0,0016 * x) + 27409,98 R^2: 0,9495 Video duration: 34,86 s Framerate: 92,08
# Measurement	Time	F	F_bleach_correct	dF/F0	dF/F0_bleach_correct	Wavelength	Info	Step
0	0.0109	32994.4		?	0	520	Calibration	-
1	0.0217	33099.9		?	0	520	Calibration	-
2	0.0326	32731.3		?	0	520	Calibration	-
3	0.0434	32142.5		?	0	520	Calibration	-
4	0.0543	32060.2		?	0	520	Calibration	-
5	0.0652	31811.1		?	0	520	Calibration	-
6	0.076	31738.1		?	0	520	Calibration	-
7	0.0869	31866		?	0	520	Calibration	-
8	0.0977	31887.4		?	0	520	Calibration	-
9	0.1086	31835.5		?	0	520	Calibration	-
10	0.1195	31969.1		?	0	520	Calibration	-
11	0.1303	31935.5		?	0	520	Calibration	-
12	0.1412	31580.4		?	0	520	Calibration	-
13	0.152	31958.6		?	0	520	Calibration	-
14	0.1629	31737.9		?	0	520	Calibration	-
15	0.1738	31665.2		?	0	520	Calibration	-
16	0.1846	31851.4		?	0	520	Calibration	-
17	0.1955	31591.1		?	0	520	Calibration	-
18	0.2063	31571		?	0	520	Calibration	-
19	0.2172	31778.9		?	0	520	Calibration	-
20	0.2281	31534.1		?	0	520	Calibration	-
21	0.2389	31797.1		?	0	520	Calibration	-
22	0.2498	31440.2		?	0	520	Calibration	-
23	0.2607	31551.2		?	0	520	Calibration	-
24	0.2715	31785.5		?	0	520	Calibration	-
25	0.2824	31528.4		?	0	520	Calibration	-
26	0.2932	31502.4		?	0	520	Calibration	-
27	0.3041	31588.2		?	0	520	Calibration	-
28	0.315	31383.9		?	0	520	Calibration	-
29	0.3258	31515.2		?	0	520	Calibration	-
30	0.3367	31621.7		?	0	520	Calibration	-
31	0.3475	31234.2		?	0	520	Calibration	-
32	0.3584	31437.1		?	0	520	Calibration	-
33	0.3693	31145		?	0	520	Calibration	-
34	0.3801	31370.2		?	0	520	Calibration	-
35	0.391	31300.2		?	0	520	Calibration	-
36	0.4018	31348.9		?	0	520	Calibration	-
37	0.4127	31213.8		?	0	520	Calibration	-
38	0.4236	31160.2		?	0	520	Calibration	-
39	0.4344	31164.3		?	0	520	Calibration	-
40	0.4453	31308.1		?	0	520	Calibration	-
41	0.4561	31018.8		?	0	520	Calibration	-
42	0.467	30804.4		?	0	520	Calibration	-
43	0.4779	31113.5		?	0	520	Calibration	-
44	0.4887	30996.2		?	0	520	Calibration	-
45	0.4996	30965.8		?	0	520	Calibration	-
46	0.5104	31276.9		?	0	520	Calibration	-
47	0.5213	31233		?	0	520	Calibration	-
48	0.5322	31035.8		?	0	520	Calibration	-
49	0.543	31032.2		?	0	520	Calibration	-
50	0.5539	31124.2		?	0	520	Calibration	-
51	0.5647	31324.9		?	0	520	Calibration	-
52	0.5756	31059.6		?	0	520	Calibration	-
53	0.5865	30982.4		?	0	520	Calibration	-
54	0.5973	31046.3		?	0	520	Calibration	-
55	0.6082	31060.2		?	0	520	Calibration	-
56	0.619	30964.6		?	0	520	Calibration	-
57	0.6299	30670.4		?	0	520	Calibration	-
58	0.6408	30781.9		?	0	520	Calibration	-
59	0.6516	30909.7		?	0	520	Calibration	-
60	0.6625	30662.3		?	0	520	Calibration	-
61	0.6733	30882		?	0	520	Calibration	-
62	0.6842	30669.4		?	0	520	Calibration	-
63	0.6951	31202.1		?	0	520	Calibration	-
64	0.7059	30766.5		?	0	520	Calibration	-
65	0.7168	30776		?	0	520	Calibration	-
66	0.7276	30855.4		?	0	520	Calibration	-
67	0.7385	30761.5		?	0	520	Calibration	-
68	0.7494	30890		?	0	520	Calibration	-
69	0.7602	30732.3		?	0	520	Calibration	-
70	0.7711	30571.8		?	0	520	Calibration	-
71	0.782	30718.1		?	0	520	Calibration	-
72	0.7928	30662.1		?	0	520	Calibration	-
73	0.8037	30675.2		?	0	520	Calibration	-
74	0.8145	30637		?	0	520	Calibration	-
75	0.8254	30696.9		?	0	520	Calibration	-
76	0.8363	30705		?	0	520	Calibration	-
77	0.8471	30811.3		?	0	520	Calibration	-
78	0.858	30425.4		?	0	520	Calibration	-
79	0.8688	30801.6		?	0	520	Calibration	-
80	0.8797	30651.6		?	0	520	Calibration	-
81	0.8906	30710.1		?	0	520	Calibration	-
82	0.9014	30199		?	0	520	Calibration	-
83	0.9123	30617.4		?	0	520	Calibration	-
84	0.9231	30463.6		?	0	520	Calibration	-
85	0.934	30473.1		?	0	520	Calibration	-
86	0.9449	30671.4		?	0	520	Calibration	-
87	0.9557	30591.6		?	0	520	Calibration	-
88	0.9666	30768.6		?	0	520	Calibration	-
89	0.9774	30557.6		?	0	520	Calibration	-
90	0.9883	30434.9		?	0	520	Calibration	-
91	0.9992	30547.2		?	0	520	Calibration	-
92	1.01	30363.4		?	0	520	Calibration	-
93	1.0209	30478.6		?	0	520	Calibration	-
94	1.0317	30332.9		?	0	520	Calibration	-
95	1.0426	30569.9		?	0	520	Calibration	-
96	1.0535	30637.1		?	0	520	Calibration	-
97	1.0643	30354.4		?	0	520	Calibration	-
98	1.0752	30318.6		?	0	520	Calibration	-
99	1.086	30099.8		?	0	520	Calibration	-
100	1.0969	30652.2		?	0	520	Calibration	-
101	1.1078	30462.8		?	0	520	Calibration	-
102	1.1186	30571.6		?	0	520	Calibration	-
103	1.1295	30463.7		?	0	520	Calibration	-
104	1.1403	30356		?	0	520	Calibration	-
105	1.1512	30244.4		?	0	520	Calibration	-
106	1.1621	30128.6		?	0	520	Calibration	-
107	1.1729	30453.2		?	0	520	Calibration	-
108	1.1838	30369.7		?	0	520	Calibration	-
109	1.1946	30506.3		?	0	520	Calibration	-
110	1.2055	30423		?	0	520	Calibration	-
111	1.2164	30444.4		?	0	520	Calibration	-
112	1.2272	30522.9		?	0	520	Calibration	-
113	1.2381	30435.6		?	0	520	Calibration	-
114	1.249	30480.7		?	0	520	Calibration	-
115	1.2598	30396.4		?	0	520	Calibration	-
116	1.2707	30195.4		?	0	520	Calibration	-
117	1.2815	30401.3		?	0	520	Calibration	-
118	1.2924	30161.7		?	0	520	Calibration	-
119	1.3033	30282.3		?	0	520	Calibration	-
120	1.3141	30301.5		?	0	520	Calibration	-
121	1.325	30340.6		?	0	520	Calibration	-
122	1.3358	30366.2		?	0	520	Calibration	-
123	1.3467	30195.7		?	0	520	Calibration	-
124	1.3576	30359.2		?	0	520	Calibration	-
125	1.3684	30178.8		?	0	520	Calibration	-
126	1.3793	30360.6		?	0	520	Calibration	-
127	1.3901	30097.9		?	0	520	Calibration	-
128	1.401	30357.3		?	0	520	Calibration	-
129	1.4119	30202.1		?	0	520	Calibration	-
130	1.4227	30472.7		?	0	520	Calibration	-
131	1.4336	30333.8		?	0	520	Calibration	-
132	1.4444	30476.6		?	0	520	Calibration	-
133	1.4553	30510.1		?	0	520	Calibration	-
134	1.4662	30195.2		?	0	520	Calibration	-
135	1.477	30131.4		?	0	520	Calibration	-
136	1.4879	30315.2		?	0	520	Calibration	-
137	1.4987	30048.6		?	0	520	Calibration	-
138	1.5096	30324.6		?	0	520	Calibration	-
139	1.5205	30173.7		?	0	520	Calibration	-
140	1.5313	30170.4		?	0	520	Calibration	-
141	1.5422	29945.2		?	0	520	Calibration	-
142	1.553	30198.8		?	0	520	Calibration	-
143	1.5639	30262.4		?	0	520	Calibration	-
144	1.5748	30260.4		?	0	520	Calibration	-
145	1.5856	30221.1		?	0	520	Calibration	-
146	1.5965	30298		?	0	520	Calibration	-
147	1.6073	30488.4		?	0	520	Calibration	-
148	1.6182	29956.6		?	0	520	Calibration	-
149	1.6291	30406.8		?	0	520	Calibration	-
150	1.6399	30276.5		?	0	520	Calibration	-
151	1.6508	30167.2		?	0	520	Calibration	-
152	1.6616	29989		?	0	520	Calibration	-
153	1.6725	30221.8		?	0	520	Calibration	-
154	1.6834	30114		?	0	520	Calibration	-
155	1.6942	29997.7		?	0	520	Calibration	-
156	1.7051	30509.9		?	0	520	Calibration	-
157	1.7159	30109.9		?	0	520	Calibration	-
158	1.7268	30120.1		?	0	520	Calibration	-
159	1.7377	30181		?	0	520	Calibration	-
160	1.7485	30187.4		?	0	520	Calibration	-
161	1.7594	30361.6		?	0	520	Calibration	-
162	1.7703	30252.2		?	0	520	Calibration	-
163	1.7811	30263.6		?	0	520	Calibration	-
164	1.792	29916.5		?	0	520	Calibration	-
165	1.8028	30238.1		?	0	520	Calibration	-
166	1.8137	30133.8		?	0	520	Calibration	-
167	1.8246	30022		?	0	520	Calibration	-
168	1.8354	30025.8		?	0	520	Calibration	-
169	1.8463	29908.6		?	0	520	Calibration	-
170	1.8571	30005.4		?	0	520	Calibration	-
171	1.868	29913.9		?	0	520	Calibration	-
172	1.8789	30033.8		?	0	520	Calibration	-
173	1.8897	30065.4		?	0	520	Calibration	-
174	1.9006	30175.9		?	0	520	Calibration	-
175	1.9114	29996		?	0	520	Calibration	-
176	1.9223	29813		?	0	520	Calibration	-
177	1.9332	30135.1		?	0	520	Calibration	-
178	1.944	30111.3		?	0	520	Calibration	-
179	1.9549	30379.8		?	0	520	Calibration	-
180	1.9657	29998.4		?	0	520	Calibration	-
181	1.9766	30462		?	0	520	Calibration	-
182	1.9875	30263		?	0	520	Calibration	-
183	1.9983	30167.8		?	0	520	Calibration	-
184	2.0092	30147.6		?	0	520	Calibration	-
185	2.02	30389.6		?	0	520	Calibration	-
186	2.0309	30170.6		?	0	520	Calibration	-
187	2.0418	30134		?	0	520	Calibration	-
188	2.0526	30071.7		?	0	520	Calibration	-
189	2.0635	30052.1		?	0	520	Calibration	-
190	2.0743	30135.8		?	0	520	Calibration	-
191	2.0852	29737.2		?	0	520	Calibration	-
192	2.0961	30149.2		?	0	520	Calibration	-
193	2.1069	30067.4		?	0	520	Calibration	-
194	2.1178	29922.9		?	0	520	Calibration	-
195	2.1286	30043.2		?	0	520	Calibration	-
196	2.1395	29759.3		?	0	520	Calibration	-
197	2.1504	30124.6		?	0	520	Calibration	-
198	2.1612	29783.9		?	0	520	Calibration	-
199	2.1721	30182.9		?	0	520	Calibration	-
200	2.1829	30200.2		?	0	520	Calibration	-
201	2.1938	30103.8		?	0	520	Calibration	-
202	2.2047	30074.3		?	0	520	Calibration	-
203	2.2155	30012.1		?	0	520	Calibration	-
204	2.2264	29877.8		?	0	520	Calibration	-
205	2.2372	30133.5		?	0	520	Calibration	-
206	2.2481	30269.1		?	0	520	Calibration	-
207	2.259	30231.3		?	0	520	Calibration	-
208	2.2698	29919.6		?	0	520	Calibration	-
209	2.2807	30123.8		?	0	520	Calibration	-
210	2.2916	29869.4		?	0	520	Calibration	-
211	2.3024	30178		?	0	520	Calibration	-
212	2.3133	29981.4		?	0	520	Calibration	-
213	2.3241	30040.8		?	0	520	Calibration	-
214	2.335	29779.8		?	0	520	Calibration	-
215	2.3459	29948.8		?	0	520	Calibration	-
216	2.3567	30087.9		?	0	520	Calibration	-
217	2.3676	30062.4		?	0	520	Calibration	-
218	2.3784	30124		?	0	520	Calibration	-
219	2.3893	29933.9		?	0	520	Calibration	-
220	2.4002	29934.9		?	0	520	Calibration	-
221	2.411	30203.7		?	0	520	Calibration	-
222	2.4219	30108.2		?	0	520	Calibration	-
223	2.4327	29997.4		?	0	520	Calibration	-
224	2.4436	30144.4		?	0	520	Calibration	-
225	2.4545	30100.1		?	0	520	Calibration	-
226	2.4653	29997.9		?	0	520	Calibration	-
227	2.4762	29809.8		?	0	520	Calibration	-
228	2.487	30156.8		?	0	520	Calibration	-
229	2.4979	29948		?	0	520	Calibration	-
230	2.5088	30037.6		?	0	520	Calibration	-
231	2.5196	30207.8		?	0	520	Calibration	-
232	2.5305	30206.5		?	0	520	Calibration	-
233	2.5413	30156.7		?	0	520	Calibration	-
234	2.5522	29836.1		?	0	520	Calibration	-
235	2.5631	30246.2		?	0	520	Calibration	-
236	2.5739	30225.8		?	0	520	Calibration	-
237	2.5848	30187.6		?	0	520	Calibration	-
238	2.5956	30216.9		?	0	520	Calibration	-
239	2.6065	30128.2		?	0	520	Calibration	-
240	2.6174	29995.4		?	0	520	Calibration	-
241	2.6282	29976		?	0	520	Calibration	-
242	2.6391	30012.8		?	0	520	Calibration	-
243	2.6499	30050.1		?	0	520	Calibration	-
244	2.6608	30164.4		?	0	520	Calibration	-
245	2.6717	30033.6		?	0	520	Calibration	-
246	2.6825	29952.1		?	0	520	Calibration	-
247	2.6934	30103.2		?	0	520	Calibration	-
248	2.7042	29945.6		?	0	520	Calibration	-
249	2.7151	30223.9		?	0	520	Calibration	-
250	2.726	29966.9		?	0	520	Calibration	-
251	2.7368	29993.1		?	0	520	Calibration	-
252	2.7477	29939.6		?	0	520	Calibration	-
253	2.7586	30116.4		?	0	520	Calibration	-
254	2.7694	29946.8		?	0	520	Calibration	-
255	2.7803	30176.5		?	0	520	Calibration	-
256	2.7911	29949.2		?	0	520	Calibration	-
257	2.802	29905.5		?	0	520	Calibration	-
258	2.8129	29902.2		?	0	520	Calibration	-
259	2.8237	29964.2		?	0	520	Calibration	-
260	2.8346	29827.8		?	0	520	Calibration	-
261	2.8454	29699.9		?	0	520	Calibration	-
262	2.8563	29814.1		?	0	520	Calibration	-
263	2.8672	29738.9		?	0	520	Calibration	-
264	2.878	29829.9		?	0	520	Calibration	-
265	2.8889	29895.7		?	0	520	Calibration	-
266	2.8997	29676.5		?	0	520	Calibration	-
267	2.9106	29629.9		?	0	520	Calibration	-
268	2.9215	30011.1		?	0	520	Calibration	-
269	2.9323	29760.1		?	0	520	Calibration	-
270	2.9432	29856.1		?	0	520	Calibration	-
271	2.954	29899.1		?	0	520	Calibration	-
272	2.9649	29791.6		?	0	520	Calibration	-
273	2.9758	29739		?	0	520	Calibration	-
274	2.9866	29883.8		?	0	520	Calibration	-
275	2.9975	29875.9		?	0	520	Calibration	-
276	3.0083	29635.2		?	0	520	Calibration	-
277	3.0192	29828.8		?	0	520	Calibration	-
278	3.0301	29830.2		?	0	520	Calibration	-
279	3.0409	29749.7		?	0	520	Calibration	-
280	3.0518	29430.2		?	0	520	Calibration	-
281	3.0626	29512.2		?	0	520	Calibration	-
282	3.0735	29849.1		?	0	520	Calibration	-
283	3.0844	29905.4		?	0	520	Calibration	-
284	3.0952	29850.3		?	0	520	Calibration	-
285	3.1061	29848.4		?	0	520	Calibration	-
286	3.1169	29806.8		?	0	520	Calibration	-
287	3.1278	29905.7		?	0	520	Calibration	-
288	3.1387	29545.8		?	0	520	Calibration	-
289	3.1495	29601.2		?	0	520	Calibration	-
290	3.1604	29906.4		?	0	520	Calibration	-
291	3.1712	29682.7		?	0	520	Calibration	-
292	3.1821	29564.4		?	0	520	Calibration	-
293	3.193	29724.9		?	0	520	Calibration	-
294	3.2038	29653.5		?	0	520	Calibration	-
295	3.2147	29713.1		?	0	520	Calibration	-
296	3.2255	29772.9		?	0	520	Calibration	-
297	3.2364	29649.2		?	0	520	Calibration	-
298	3.2473	29677.8		?	0	520	Calibration	-
299	3.2581	29748.9		?	0	520	Calibration	-
300	3.269	29659.5		?	0	520	Calibration	-
301	3.2799	29691.2		?	0	520	Calibration	-
302	3.2907	29534.1		?	0	520	Calibration	-
303	3.3016	30123.6		?	0	520	Calibration	-
304	3.3124	29605.6		?	0	520	Calibration	-
305	3.3233	29676.2		?	0	520	Calibration	-
306	3.3342	29813.3		?	0	520	Calibration	-
307	3.345	29401.9		?	0	520	Calibration	-
308	3.3559	29600.5		?	0	520	Calibration	-
309	3.3667	29712.7		?	0	520	Calibration	-
310	3.3776	29727.2		?	0	520	Calibration	-
311	3.3885	29789.6		?	0	520	Calibration	-
312	3.3993	29669.2		?	0	520	Calibration	-
313	3.4102	29676.9		?	0	520	Calibration	-
314	3.421	29459.6		?	0	520	Calibration	-
315	3.4319	29480.6		?	0	520	Calibration	-
316	3.4428	29606.6		?	0	520	Calibration	-
317	3.4536	29538.8		?	0	520	Calibration	-
318	3.4645	29601.4		?	0	520	Calibration	-
319	3.4753	29646.8		?	0	520	Calibration	-
320	3.4862	29875.8		?	0	520	Calibration	-
321	3.4971	29828.3		?	0	520	Calibration	-
322	3.5079	29706.6		?	0	520	Calibration	-
323	3.5188	29749.9		?	0	520	Calibration	-
324	3.5296	29502.1		?	0	520	Calibration	-
325	3.5405	29659.1		?	0	520	Calibration	-
326	3.5514	29651.1		?	0	520	Calibration	-
327	3.5622	29317.7		?	0	520	Calibration	-
328	3.5731	29443.2		?	0	520	Calibration	-
329	3.5839	29472.3		?	0	520	Calibration	-
330	3.5948	29581.3		?	0	520	Calibration	-
331	3.6057	29336.8		?	0	520	Calibration	-
332	3.6165	29629.2		?	0	520	Calibration	-
333	3.6274	29544.8		?	0	520	Calibration	-
334	3.6382	29433.8		?	0	520	Calibration	-
335	3.6491	29526.5		?	0	520	Calibration	-
336	3.66	29600.1		?	0	520	Calibration	-
337	3.6708	29643.1		?	0	520	Calibration	-
338	3.6817	29571.8		?	0	520	Calibration	-
339	3.6925	29592.4		?	0	520	Calibration	-
340	3.7034	29316.9		?	0	520	Calibration	-
341	3.7143	29708		?	0	520	Calibration	-
342	3.7251	29527.9		?	0	520	Calibration	-
343	3.736	29562.4		?	0	520	Calibration	-
344	3.7469	29625.9		?	0	520	Calibration	-
345	3.7577	29576.4		?	0	520	Calibration	-
346	3.7686	29379.2		?	0	520	Calibration	-
347	3.7794	29319.6		?	0	520	Calibration	-
348	3.7903	29423.3		?	0	520	Calibration	-
349	3.8012	29274.5		?	0	520	Calibration	-
350	3.812	29452.8		?	0	520	Calibration	-
351	3.8229	29193.9		?	0	520	Calibration	-
352	3.8337	29464.5		?	0	520	Calibration	-
353	3.8446	29307.9		?	0	520	Calibration	-
354	3.8555	29383		?	0	520	Calibration	-
355	3.8663	29338.3		?	0	520	Calibration	-
356	3.8772	29613.9		?	0	520	Calibration	-
357	3.888	29268.8		?	0	520	Calibration	-
358	3.8989	29121.4		?	0	520	Calibration	-
359	3.9098	29139.8		?	0	520	Calibration	-
360	3.9206	29446.4		?	0	520	Calibration	-
361	3.9315	29030.2		?	0	520	Calibration	-
362	3.9423	29267.8		?	0	520	Calibration	-
363	3.9532	29427.6		?	0	520	Calibration	-
364	3.9641	29229.1		?	0	520	Calibration	-
365	3.9749	29407.7		?	0	520	Calibration	-
366	3.9858	29677.9		?	0	520	Calibration	-
367	3.9966	29422.5		?	0	520	Calibration	-
368	4.0075	29526.8		?	0	520	Calibration	-
369	4.0184	29394.2		?	0	520	Calibration	-
370	4.0292	29488.8		?	0	520	Calibration	-
371	4.0401	29482.1		?	0	520	Calibration	-
372	4.0509	29377.7		?	0	520	Calibration	-
373	4.0618	29508.8		?	0	520	Calibration	-
374	4.0727	29514.9		?	0	520	Calibration	-
375	4.0835	29175.1		?	0	520	Calibration	-
376	4.0944	29395.2		?	0	520	Calibration	-
377	4.1052	29452.6		?	0	520	Calibration	-
378	4.1161	29174.7		?	0	520	Calibration	-
379	4.127	29403.9		?	0	520	Calibration	-
380	4.1378	29145		?	0	520	Calibration	-
381	4.1487	29394.1		?	0	520	Calibration	-
382	4.1595	29097.4		?	0	520	Calibration	-
383	4.1704	29042.4		?	0	520	Calibration	-
384	4.1813	29442.4		?	0	520	Calibration	-
385	4.1921	29228.6		?	0	520	Calibration	-
386	4.203	29400.8		?	0	520	Calibration	-
387	4.2138	29583.2		?	0	520	Calibration	-
388	4.2247	29279.8		?	0	520	Calibration	-
389	4.2356	29450		?	0	520	Calibration	-
390	4.2464	29324.1		?	0	520	Calibration	-
391	4.2573	29381.6		?	0	520	Calibration	-
392	4.2682	29385.6		?	0	520	Calibration	-
393	4.279	29477.7		?	0	520	Calibration	-
394	4.2899	29296.4		?	0	520	Calibration	-
395	4.3007	29284.4		?	0	520	Calibration	-
396	4.3116	29305.6		?	0	520	Calibration	-
397	4.3225	29182.6		?	0	520	Calibration	-
398	4.3333	29547.6		?	0	520	Calibration	-
399	4.3442	29464.6		?	0	520	Calibration	-
400	4.355	29185.1		?	0	520	Calibration	-
401	4.3659	29039.1		?	0	520	Calibration	-
402	4.3768	29178.8		?	0	520	Calibration	-
403	4.3876	29029.9		?	0	520	Calibration	-
404	4.3985	29261.4		?	0	520	Calibration	-
405	4.4093	29387.4		?	0	520	Calibration	-
406	4.4202	29210.7		?	0	520	Calibration	-
407	4.4311	29289.2		?	0	520	Calibration	-
408	4.4419	29211.5		?	0	520	Calibration	-
409	4.4528	29337.4		?	0	520	Calibration	-
410	4.4636	29331.7		?	0	520	Calibration	-
411	4.4745	29257.9		?	0	520	Calibration	-
412	4.4854	29235.3		?	0	520	Calibration	-
413	4.4962	29081.8		?	0	520	Calibration	-
414	4.5071	29216.5		?	0	520	Calibration	-
415	4.5179	29437		?	0	520	Calibration	-
416	4.5288	29352		?	0	520	Calibration	-
417	4.5397	29196.1		?	0	520	Calibration	-
418	4.5505	29048.8		?	0	520	Calibration	-
419	4.5614	28894.4		?	0	520	Calibration	-
420	4.5722	29290.9		?	0	520	Calibration	-
421	4.5831	29277.7		?	0	520	Calibration	-
422	4.594	29273.6		?	0	520	Calibration	-
423	4.6048	29164.5		?	0	520	Calibration	-
424	4.6157	29094.9		?	0	520	Calibration	-
425	4.6265	29269.9		?	0	520	Calibration	-
426	4.6374	29202.4		?	0	520	Calibration	-
427	4.6483	29022.2		?	0	520	Calibration	-
428	4.6591	28897.4		?	0	520	Calibration	-
429	4.67	28986.4		?	0	520	Calibration	-
430	4.6808	29079.3		?	0	520	Calibration	-
431	4.6917	29308.6		?	0	520	Calibration	-
432	4.7026	28942.3		?	0	520	Calibration	-
433	4.7134	29168.1		?	0	520	Calibration	-
434	4.7243	29218.4		?	0	520	Calibration	-
435	4.7352	29026.2		?	0	520	Calibration	-
436	4.746	29227.4		?	0	520	Calibration	-
437	4.7569	28885.2		?	0	520	Calibration	-
438	4.7677	28988.1		?	0	520	Calibration	-
439	4.7786	28883		?	0	520	Calibration	-
440	4.7895	29275.7		?	0	520	Calibration	-
441	4.8003	29348.2		?	0	520	Calibration	-
442	4.8112	29400.8		?	0	520	Calibration	-
443	4.822	29239.4		?	0	520	Calibration	-
444	4.8329	28994.7		?	0	520	Calibration	-
445	4.8438	29287		?	0	520	Calibration	-
446	4.8546	29110.7		?	0	520	Calibration	-
447	4.8655	29343.4		?	0	520	Calibration	-
448	4.8763	28870.4		?	0	520	Calibration	-
449	4.8872	29134.4		?	0	520	Calibration	-
450	4.8981	29068.9		?	0	520	Calibration	-
451	4.9089	29020.9		?	0	520	Calibration	-
452	4.9198	29043.1		?	0	520	Calibration	-
453	4.9306	28924.4		?	0	520	Calibration	-
454	4.9415	28860.1		?	0	520	Calibration	-
455	4.9524	29015.4		?	0	520	Calibration	-
456	4.9632	28984.1		?	0	520	Calibration	-
457	4.9741	29012.9		?	0	520	Calibration	-
458	4.9849	28885.6		?	0	520	Calibration	-
459	4.9958	29000		?	0	520	Calibration	-
460	5.0067	29123.1		?	0	520	Calibration	-
461	5.0175	28970.3		?	0	520	Calibration	-
462	5.0284	29049		?	0	520	Calibration	-
463	5.0392	29155.2		?	0	520	Calibration	-
464	5.0501	28987.4		?	0	520	Calibration	-
465	5.061	28933.4		?	0	520	Calibration	-
466	5.0718	28943.8		?	0	520	Calibration	-
467	5.0827	29035.1		?	0	520	Calibration	-
468	5.0935	29063.9		?	0	520	Calibration	-
469	5.1044	28897.2		?	0	520	Calibration	-
470	5.1153	29127		?	0	520	Calibration	-
471	5.1261	29030.6		?	0	520	Calibration	-
472	5.137	29008.8		?	0	520	Calibration	-
473	5.1478	28991.1		?	0	520	Calibration	-
474	5.1587	28940.6		?	0	520	Calibration	-
475	5.1696	29220.9		?	0	520	Calibration	-
476	5.1804	29088.2		?	0	520	Calibration	-
477	5.1913	28819.1		?	0	520	Calibration	-
478	5.2021	29255.6		?	0	520	Calibration	-
479	5.213	29110.2		?	0	520	Calibration	-
480	5.2239	29137.4		?	0	520	Calibration	-
481	5.2347	29128.8		?	0	520	Calibration	-
482	5.2456	29129.7		?	0	520	Calibration	-
483	5.2565	28972.4		?	0	520	Calibration	-
484	5.2673	28961.7		?	0	520	Calibration	-
485	5.2782	29016.1		?	0	520	Calibration	-
486	5.289	29196.6		?	0	520	Calibration	-
487	5.2999	28752		?	0	520	Calibration	-
488	5.3108	29126.1		?	0	520	Calibration	-
489	5.3216	28769		?	0	520	Calibration	-
490	5.3325	29251.8		?	0	520	Calibration	-
491	5.3433	29243.5		?	0	520	Calibration	-
492	5.3542	28961.1		?	0	520	Calibration	-
493	5.3651	29053.8		?	0	520	Calibration	-
494	5.3759	29294.3		?	0	520	Calibration	-
495	5.3868	29262.3		?	0	520	Calibration	-
496	5.3976	29375.5		?	0	520	Calibration	-
497	5.4085	29039.4		?	0	520	Calibration	-
498	5.4194	29255.3		?	0	520	Calibration	-
499	5.4302	28966.8		?	0	520	Calibration	-
500	5.4411	29288.5		?	0	520	Calibration	-
501	5.4519	29132.2		?	0	520	Calibration	-
502	5.4628	29296.7		?	0	520	Calibration	-
503	5.4737	29237.5		?	0	520	Calibration	-
504	5.4845	29062.2		?	0	520	Calibration	-
505	5.4954	28971.9		?	0	520	Calibration	-
506	5.5062	29183.3		?	0	520	Calibration	-
507	5.5171	29122.8		?	0	520	Calibration	-
508	5.528	29262.8		?	0	520	Calibration	-
509	5.5388	29185		?	0	520	Calibration	-
510	5.5497	29097.5		?	0	520	Calibration	-
511	5.5605	29141.4		?	0	520	Calibration	-
512	5.5714	29233		?	0	520	Calibration	-
513	5.5823	29099.2		?	0	520	Calibration	-
514	5.5931	29063.1		?	0	520	Calibration	-
515	5.604	29207.4		?	0	520	Calibration	-
516	5.6148	29356.1		?	0	520	Calibration	-
517	5.6257	29206.1		?	0	520	Calibration	-
518	5.6366	29058.1		?	0	520	Calibration	-
519	5.6474	29077.5		?	0	520	Calibration	-
520	5.6583	29100.1		?	0	520	Calibration	-
521	5.6691	29128.1		?	0	520	Calibration	-
522	5.68	29082.1		?	0	520	Calibration	-
523	5.6909	29227.4		?	0	520	Calibration	-
524	5.7017	29193.8		?	0	520	Calibration	-
525	5.7126	29039.4		?	0	520	Calibration	-
526	5.7234	29013.9		?	0	520	Calibration	-
527	5.7343	29298.8		?	0	520	Calibration	-
528	5.7452	29076.9		?	0	520	Calibration	-
529	5.756	29079.5		?	0	520	Calibration	-
530	5.7669	29219.9		?	0	520	Calibration	-
531	5.7778	29018.1		?	0	520	Calibration	-
532	5.7886	29047.4		?	0	520	Calibration	-
533	5.7995	28930.2		?	0	520	Calibration	-
534	5.8103	29174.8		?	0	520	Calibration	-
535	5.8212	28882.5		?	0	520	Calibration	-
536	5.8321	29058		?	0	520	Calibration	-
537	5.8429	29201.6		?	0	520	Calibration	-
538	5.8538	29050.2		?	0	520	Calibration	-
539	5.8646	29195.1		?	0	520	Calibration	-
540	5.8755	29016.3		?	0	520	Calibration	-
541	5.8864	29015.1		?	0	520	Calibration	-
542	5.8972	29071.8		?	0	520	Calibration	-
543	5.9081	29087.1		?	0	520	Calibration	-
544	5.9189	29106.5		?	0	520	Calibration	-
545	5.9298	28731.9		?	0	520	Calibration	-
546	5.9407	28912.1		?	0	520	Calibration	-
547	5.9515	29194.8		?	0	520	Calibration	-
548	5.9624	28980.2		?	0	520	Calibration	-
549	5.9732	29105.9		?	0	520	Calibration	-
550	5.9841	29346.4		?	0	520	Calibration	-
551	5.995	29152.9		?	0	520	Calibration	-
552	6.0058	28964.1		?	0	520	Calibration	-
553	6.0167	28971.9		?	0	520	Calibration	-
554	6.0275	29254.4		?	0	520	Calibration	-
555	6.0384	29041.4		?	0	520	Calibration	-
556	6.0493	29206.3		?	0	520	Calibration	-
557	6.0601	28954.8		?	0	520	Calibration	-
558	6.071	29059.5		?	0	520	Calibration	-
559	6.0818	29142.7		?	0	520	Calibration	-
560	6.0927	29086.3		?	0	520	Calibration	-
561	6.1036	29223.8		?	0	520	Calibration	-
562	6.1144	29166.6		?	0	520	Calibration	-
563	6.1253	29205.5		?	0	520	Calibration	-
564	6.1361	29092.6		?	0	520	Calibration	-
565	6.147	28980.7		?	0	520	Calibration	-
566	6.1579	28924.8		?	0	520	Calibration	-
567	6.1687	29174.1		?	0	520	Calibration	-
568	6.1796	28953.7		?	0	520	Calibration	-
569	6.1904	28947		?	0	520	Calibration	-
570	6.2013	29144.1		?	0	520	Calibration	-
571	6.2122	29348.3		?	0	520	Calibration	-
572	6.223	29136.9		?	0	520	Calibration	-
573	6.2339	29011.6		?	0	520	Calibration	-
574	6.2448	29125		?	0	520	Calibration	-
575	6.2556	29004		?	0	520	Calibration	-
576	6.2665	28960.6		?	0	520	Calibration	-
577	6.2773	28937.2		?	0	520	Calibration	-
578	6.2882	28989.6		?	0	520	Calibration	-
579	6.2991	28922.9		?	0	520	Calibration	-
580	6.3099	29123		?	0	520	Calibration	-
581	6.3208	29193.7		?	0	520	Calibration	-
582	6.3316	28980.2		?	0	520	Calibration	-
583	6.3425	28964.2		?	0	520	Calibration	-
584	6.3534	29046.8		?	0	520	Calibration	-
585	6.3642	29299.2		?	0	520	Calibration	-
586	6.3751	29071.2		?	0	520	Calibration	-
587	6.3859	29054.1		?	0	520	Calibration	-
588	6.3968	29144.7		?	0	520	Calibration	-
589	6.4077	29026.8		?	0	520	Calibration	-
590	6.4185	29221.4		?	0	520	Calibration	-
591	6.4294	29166.2		?	0	520	Calibration	-
592	6.4402	29099.5		?	0	520	Calibration	-
593	6.4511	29208.6		?	0	520	Calibration	-
594	6.462	29290.3		?	0	520	Calibration	-
595	6.4728	29268.5		?	0	520	Calibration	-
596	6.4837	29286.9		?	0	520	Calibration	-
597	6.4945	29078.2		?	0	520	Calibration	-
598	6.5054	28970.6		?	0	520	Calibration	-
599	6.5163	28981.7		?	0	520	Calibration	-
600	6.5271	29100.4		?	0	520	Calibration	-
601	6.538	29443.4		?	0	520	Calibration	-
602	6.5488	29404.4		?	0	520	Calibration	-
603	6.5597	29264.1		?	0	520	Calibration	-
604	6.5706	29025.4		?	0	520	Calibration	-
605	6.5814	28838.9		?	0	520	Calibration	-
606	6.5923	29112		?	0	520	Calibration	-
607	6.6031	29033.2		?	0	520	Calibration	-
608	6.614	29157		?	0	520	Calibration	-
609	6.6249	29223.6		?	0	520	Calibration	-
610	6.6357	29072.2		?	0	520	Calibration	-
611	6.6466	29191.8		?	0	520	Calibration	-
612	6.6574	29239.2		?	0	520	Calibration	-
613	6.6683	29074.9		?	0	520	Calibration	-
614	6.6792	29106		?	0	520	Calibration	-
615	6.69	28855.6		?	0	520	Calibration	-
616	6.7009	29205.6		?	0	520	Calibration	-
617	6.7117	29193.2		?	0	520	Calibration	-
618	6.7226	29044.4		?	0	520	Calibration	-
619	6.7335	29001.4		?	0	520	Calibration	-
620	6.7443	29166.7		?	0	520	Calibration	-
621	6.7552	29289.6		?	0	520	Calibration	-
622	6.7661	29243		?	0	520	Calibration	-
623	6.7769	29289.7		?	0	520	Calibration	-
624	6.7878	29519.4		?	0	520	Calibration	-
625	6.7986	29458.4		?	0	520	Calibration	-
626	6.8095	29292.8		?	0	520	Calibration	-
627	6.8204	29351.9		?	0	520	Calibration	-
628	6.8312	29262.6		?	0	520	Calibration	-
629	6.8421	29372.9		?	0	520	Calibration	-
630	6.8529	29045.8		?	0	520	Calibration	-
631	6.8638	29386.3		?	0	520	Calibration	-
632	6.8747	29014.5		?	0	520	Calibration	-
633	6.8855	29258.1		?	0	520	Calibration	-
634	6.8964	29261.8		?	0	520	Calibration	-
635	6.9072	29411.6		?	0	520	Calibration	-
636	6.9181	29221.9		?	0	520	Calibration	-
637	6.929	29181.8		?	0	520	Calibration	-
638	6.9398	29113		?	0	520	Calibration	-
639	6.9507	29261.9		?	0	520	Calibration	-
640	6.9615	29287.8		?	0	520	Calibration	-
641	6.9724	29259.7		?	0	520	Calibration	-
642	6.9833	29255.4		?	0	520	Calibration	-
643	6.9941	29364.6		?	0	520	Calibration	-
644	7.005	29154.9		?	0	520	Calibration	-
645	7.0158	29268.3		?	0	520	Calibration	-
646	7.0267	29174.4		?	0	520	Calibration	-
647	7.0376	29260.8		?	0	520	Calibration	-
648	7.0484	29220.6		?	0	520	Calibration	-
649	7.0593	29206.1		?	0	520	Calibration	-
650	7.0701	29454.5		?	0	520	Calibration	-
651	7.081	29288.9		?	0	520	Calibration	-
652	7.0919	28986.1		?	0	520	Calibration	-
653	7.1027	29234.8		?	0	520	Calibration	-
654	7.1136	29142.6		?	0	520	Calibration	-
655	7.1244	28966.6		?	0	520	Calibration	-
656	7.1353	29137.2		?	0	520	Calibration	-
657	7.1462	29208.8		?	0	520	Calibration	-
658	7.157	29026.4		?	0	520	Calibration	-
659	7.1679	29082.2		?	0	520	Calibration	-
660	7.1787	29156.8		?	0	520	Calibration	-
661	7.1896	29225.5		?	0	520	Calibration	-
662	7.2005	29080.1		?	0	520	Calibration	-
663	7.2113	29142		?	0	520	Calibration	-
664	7.2222	29062.1		?	0	520	Calibration	-
665	7.2331	29100.4		?	0	520	Calibration	-
666	7.2439	29009.2		?	0	520	Calibration	-
667	7.2548	29135		?	0	520	Calibration	-
668	7.2656	29154.5		?	0	520	Calibration	-
669	7.2765	28959.4		?	0	520	Calibration	-
670	7.2874	28990.5		?	0	520	Calibration	-
671	7.2982	28991.7		?	0	520	Calibration	-
672	7.3091	29413.3		?	0	520	Calibration	-
673	7.3199	28968.1		?	0	520	Calibration	-
674	7.3308	29006.7		?	0	520	Calibration	-
675	7.3417	28875.6		?	0	520	Calibration	-
676	7.3525	29248.2		?	0	520	Calibration	-
677	7.3634	29192.3		?	0	520	Calibration	-
678	7.3742	29005.1		?	0	520	Calibration	-
679	7.3851	28905.2		?	0	520	Calibration	-
680	7.396	28972.2		?	0	520	Calibration	-
681	7.4068	28969.5		?	0	520	Calibration	-
682	7.4177	28779.3		?	0	520	Calibration	-
683	7.4285	28998		?	0	520	Calibration	-
684	7.4394	28935		?	0	520	Calibration	-
685	7.4503	28621.9		?	0	520	Calibration	-
686	7.4611	28914		?	0	520	Calibration	-
687	7.472	29194.5		?	0	520	Calibration	-
688	7.4828	28992.7		?	0	520	Calibration	-
689	7.4937	28951.5		?	0	520	Calibration	-
690	7.5046	28858.7		?	0	520	Calibration	-
691	7.5154	28773		?	0	520	Calibration	-
692	7.5263	28993.2		?	0	520	Calibration	-
693	7.5371	28884.6		?	0	520	Calibration	-
694	7.548	28977.5		?	0	520	Calibration	-
695	7.5589	28922.1		?	0	520	Calibration	-
696	7.5697	28851.9		?	0	520	Calibration	-
697	7.5806	28983.4		?	0	520	Calibration	-
698	7.5914	28965.9		?	0	520	Calibration	-
699	7.6023	29043.9		?	0	520	Calibration	-
700	7.6132	28678.1		?	0	520	Calibration	-
701	7.624	28978.6		?	0	520	Calibration	-
702	7.6349	28906.2		?	0	520	Calibration	-
703	7.6457	28779.9		?	0	520	Calibration	-
704	7.6566	28875.9		?	0	520	Calibration	-
705	7.6675	28877.1		?	0	520	Calibration	-
706	7.6783	28826.9		?	0	520	Calibration	-
707	7.6892	28769.9		?	0	520	Calibration	-
708	7.7	28859		?	0	520	Calibration	-
709	7.7109	28931		?	0	520	Calibration	-
710	7.7218	28809.2		?	0	520	Calibration	-
711	7.7326	28854.6		?	0	520	Calibration	-
712	7.7435	28678.8		?	0	520	Calibration	-
713	7.7544	28762.4		?	0	520	Calibration	-
714	7.7652	28788.8		?	0	520	Calibration	-
715	7.7761	28721.1		?	0	520	Calibration	-
716	7.7869	28859.9		?	0	520	Calibration	-
717	7.7978	28784.9		?	0	520	Calibration	-
718	7.8087	28805.1		?	0	520	Calibration	-
719	7.8195	28727.9		?	0	520	Calibration	-
720	7.8304	28512.1		?	0	520	Calibration	-
721	7.8412	28736.6		?	0	520	Calibration	-
722	7.8521	28641.6		?	0	520	Calibration	-
723	7.863	28597.8		?	0	520	Calibration	-
724	7.8738	28790.9		?	0	520	Calibration	-
725	7.8847	28546		?	0	520	Calibration	-
726	7.8955	28811.6		?	0	520	Calibration	-
727	7.9064	28827.6		?	0	520	Calibration	-
728	7.9173	28502.1		?	0	520	Calibration	-
729	7.9281	28648.7		?	0	520	Calibration	-
730	7.939	28779.4		?	0	520	Calibration	-
731	7.9498	28772.9		?	0	520	Calibration	-
732	7.9607	28739.5		?	0	520	Calibration	-
733	7.9716	28706.7		?	0	520	Calibration	-
734	7.9824	28631.9		?	0	520	Calibration	-
735	7.9933	28751.1		?	0	520	Calibration	-
736	8.0041	28754.9		?	0	520	Calibration	-
737	8.015	28780.3		?	0	520	Calibration	-
738	8.0259	28719.9		?	0	520	Calibration	-
739	8.0367	28909.3		?	0	520	Calibration	-
740	8.0476	28387.9		?	0	520	Calibration	-
741	8.0584	28705.1		?	0	520	Calibration	-
742	8.0693	28592.2		?	0	520	Calibration	-
743	8.0802	28671.2		?	0	520	Calibration	-
744	8.091	28423.3		?	0	520	Calibration	-
745	8.1019	28575.4		?	0	520	Calibration	-
746	8.1127	28445.6		?	0	520	Calibration	-
747	8.1236	28360.1		?	0	520	Calibration	-
748	8.1345	28573.1		?	0	520	Calibration	-
749	8.1453	28482.1		?	0	520	Calibration	-
750	8.1562	28486.5		?	0	520	Calibration	-
751	8.167	28595.5		?	0	520	Calibration	-
752	8.1779	28741		?	0	520	Calibration	-
753	8.1888	28621.1		?	0	520	Calibration	-
754	8.1996	28290.1		?	0	520	Calibration	-
755	8.2105	28461.9		?	0	520	Calibration	-
756	8.2214	28608.6		?	0	520	Calibration	-
757	8.2322	28530.6		?	0	520	Calibration	-
758	8.2431	28446.6		?	0	520	Calibration	-
759	8.2539	28563.9		?	0	520	Calibration	-
760	8.2648	28405		?	0	520	Calibration	-
761	8.2757	28322.8		?	0	520	Calibration	-
762	8.2865	28425.3		?	0	520	Calibration	-
763	8.2974	28637.8		?	0	520	Calibration	-
764	8.3082	28568.8		?	0	520	Calibration	-
765	8.3191	28316.2		?	0	520	Calibration	-
766	8.33	28495.5		?	0	520	Calibration	-
767	8.3408	28356.9		?	0	520	Calibration	-
768	8.3517	28301.6		?	0	520	Calibration	-
769	8.3625	28605.1		?	0	520	Calibration	-
770	8.3734	28320.2		?	0	520	Calibration	-
771	8.3843	28488.6		?	0	520	Calibration	-
772	8.3951	28408.2		?	0	520	Calibration	-
773	8.406	28414.4		?	0	520	Calibration	-
774	8.4168	28524.3		?	0	520	Calibration	-
775	8.4277	28553.4		?	0	520	Calibration	-
776	8.4386	28501.9		?	0	520	Calibration	-
777	8.4494	28417.3		?	0	520	Calibration	-
778	8.4603	28334.3		?	0	520	Calibration	-
779	8.4711	28456.4		?	0	520	Calibration	-
780	8.482	28257.8		?	0	520	Calibration	-
781	8.4929	28285.4		?	0	520	Calibration	-
782	8.5037	28565.6		?	0	520	Calibration	-
783	8.5146	28502.2		?	0	520	Calibration	-
784	8.5254	28430.9		?	0	520	Calibration	-
785	8.5363	28478.2		?	0	520	Calibration	-
786	8.5472	28118		?	0	520	Calibration	-
787	8.558	28299.9		?	0	520	Calibration	-
788	8.5689	28310.7		?	0	520	Calibration	-
789	8.5797	28219.6		?	0	520	Calibration	-
790	8.5906	28073.8		?	0	520	Calibration	-
791	8.6015	27917.5		?	0	520	Calibration	-
792	8.6123	28202.3		?	0	520	Calibration	-
793	8.6232	28434		?	0	520	Calibration	-
794	8.634	28133.1		?	0	520	Calibration	-
795	8.6449	28444.3		?	0	520	Calibration	-
796	8.6558	28267.5		?	0	520	Calibration	-
797	8.6666	28263.2		?	0	520	Calibration	-
798	8.6775	28120.9		?	0	520	Calibration	-
799	8.6883	28031.5		?	0	520	Calibration	-
800	8.6992	28118.6		?	0	520	Calibration	-
801	8.7101	28144.9		?	0	520	Calibration	-
802	8.7209	27993.9		?	0	520	Calibration	-
803	8.7318	28093.8		?	0	520	Calibration	-
804	8.7427	28124.9		?	0	520	Calibration	-
805	8.7535	28018.4		?	0	520	Calibration	-
806	8.7644	28080.1		?	0	520	Calibration	-
807	8.7752	28296.1		?	0	520	Calibration	-
808	8.7861	28145.4		?	0	520	Calibration	-
809	8.797	28239.9		?	0	520	Calibration	-
810	8.8078	28280.9		?	0	520	Calibration	-
811	8.8187	28193.7		?	0	520	Calibration	-
812	8.8295	28198.5		?	0	520	Calibration	-
813	8.8404	28260.8		?	0	520	Calibration	-
814	8.8513	28347.7		?	0	520	Calibration	-
815	8.8621	28386.2		?	0	520	Calibration	-
816	8.873	28199.3		?	0	520	Calibration	-
817	8.8838	28068.5		?	0	520	Calibration	-
818	8.8947	28394.9		?	0	520	Calibration	-
819	8.9056	28317.1		?	0	520	Calibration	-
820	8.9164	28104.6		?	0	520	Calibration	-
821	8.9273	28108		?	0	520	Calibration	-
822	8.9381	28456.8		?	0	520	Calibration	-
823	8.949	28227.1		?	0	520	Calibration	-
824	8.9599	28277.9		?	0	520	Calibration	-
825	8.9707	28036.7		?	0	520	Calibration	-
826	8.9816	28051.5		?	0	520	Calibration	-
827	8.9924	28197.9		?	0	520	Calibration	-
828	9.0033	28124.9		?	0	520	Calibration	-
829	9.0142	28055.8		?	0	520	Calibration	-
830	9.025	27973.8		?	0	520	Calibration	-
831	9.0359	28110.6		?	0	520	Calibration	-
832	9.0467	28047.9		?	0	520	Calibration	-
833	9.0576	28202.3		?	0	520	Calibration	-
834	9.0685	27969.8		?	0	520	Calibration	-
835	9.0793	27929.8		?	0	520	Calibration	-
836	9.0902	28034		?	0	520	Calibration	-
837	9.101	28185		?	0	520	Calibration	-
838	9.1119	28194.9		?	0	520	Calibration	-
839	9.1228	28206		?	0	520	Calibration	-
840	9.1336	28386.6		?	0	520	Calibration	-
841	9.1445	28054.3		?	0	520	Calibration	-
842	9.1553	28278.1		?	0	520	Calibration	-
843	9.1662	28228.9		?	0	520	Calibration	-
844	9.1771	28159.6		?	0	520	Calibration	-
845	9.1879	28222.6		?	0	520	Calibration	-
846	9.1988	28122.6		?	0	520	Calibration	-
847	9.2096	28140.9		?	0	520	Calibration	-
848	9.2205	28136.1		?	0	520	Calibration	-
849	9.2314	28156.1		?	0	520	Calibration	-
850	9.2422	28108.4		?	0	520	Calibration	-
851	9.2531	28254.8		?	0	520	Calibration	-
852	9.264	28079.9		?	0	520	Calibration	-
853	9.2748	27927.2		?	0	520	Calibration	-
854	9.2857	28059.9		?	0	520	Calibration	-
855	9.2965	28051.9		?	0	520	Calibration	-
856	9.3074	28157.6		?	0	520	Calibration	-
857	9.3183	28075.5		?	0	520	Calibration	-
858	9.3291	28090.7		?	0	520	Calibration	-
859	9.34	27967.1		?	0	520	Calibration	-
860	9.3508	28144.6		?	0	520	Calibration	-
861	9.3617	27923.9		?	0	520	Calibration	-
862	9.3726	28047.8		?	0	520	Calibration	-
863	9.3834	27941.2		?	0	520	Calibration	-
864	9.3943	28021.8		?	0	520	Calibration	-
865	9.4051	28060.5		?	0	520	Calibration	-
866	9.416	28076.6		?	0	520	Calibration	-
867	9.4269	28161.9		?	0	520	Calibration	-
868	9.4377	28130.3		?	0	520	Calibration	-
869	9.4486	28231.9		?	0	520	Calibration	-
870	9.4594	28201.1		?	0	520	Calibration	-
871	9.4703	28355.5		?	0	520	Calibration	-
872	9.4812	28035.1		?	0	520	Calibration	-
873	9.492	28056.3		?	0	520	Calibration	-
874	9.5029	28203.9		?	0	520	Calibration	-
875	9.5137	28014.6		?	0	520	Calibration	-
876	9.5246	28197.3		?	0	520	Calibration	-
877	9.5355	28200.4		?	0	520	Calibration	-
878	9.5463	28112.5		?	0	520	Calibration	-
879	9.5572	28004.1		?	0	520	Calibration	-
880	9.568	27959.8		?	0	520	Calibration	-
881	9.5789	28234.8		?	0	520	Calibration	-
882	9.5898	28125		?	0	520	Calibration	-
883	9.6006	28291.6		?	0	520	Calibration	-
884	9.6115	27992.8		?	0	520	Calibration	-
885	9.6223	28022.6		?	0	520	Calibration	-
886	9.6332	27977.6		?	0	520	Calibration	-
887	9.6441	28066.2		?	0	520	Calibration	-
888	9.6549	27749.4		?	0	520	Calibration	-
889	9.6658	27973.6		?	0	520	Calibration	-
890	9.6766	28024.3		?	0	520	Calibration	-
891	9.6875	27848.2		?	0	520	Calibration	-
892	9.6984	28063.8		?	0	520	Calibration	-
893	9.7092	27698.2		?	0	520	Calibration	-
894	9.7201	28031		?	0	520	Calibration	-
895	9.731	27975.1		?	0	520	Calibration	-
896	9.7418	28033.8		?	0	520	Calibration	-
897	9.7527	28163.6		?	0	520	Calibration	-
898	9.7635	27994.2		?	0	520	Calibration	-
899	9.7744	27925.1		?	0	520	Calibration	-
900	9.7853	28121.8		?	0	520	Calibration	-
901	9.7961	28171.1		?	0	520	Calibration	-
902	9.807	28252.9		?	0	520	Calibration	-
903	9.8178	28024.4		?	0	520	Calibration	-
904	9.8287	28031.9		?	0	520	Calibration	-
905	9.8396	28145.2		?	0	520	Calibration	-
906	9.8504	28068.8		?	0	520	Calibration	-
907	9.8613	27994.4		?	0	520	Calibration	-
908	9.8721	27912.6		?	0	520	Calibration	-
909	9.883	28107.1		?	0	520	Calibration	-
910	9.8939	28031.9		?	0	520	Calibration	-
911	9.9047	27957.3		?	0	520	Calibration	-
912	9.9156	28058.8		?	0	520	Calibration	-
913	9.9264	27901.1		?	0	520	Calibration	-
914	9.9373	28002.1		?	0	520	Calibration	-
915	9.9482	28319.1		?	0	520	Calibration	-
916	9.959	28251.9		?	0	520	Calibration	-
917	9.9699	28097.5		?	0	520	Calibration	-
918	9.9807	28353.2		?	0	520	Calibration	-
919	9.9916	28345.6		?	0	520	Calibration	-
920	10.0025	28035.7		?	0	520	Calibration	-
921	10.0133	28394.5		?	0	520	Calibration	-
922	10.0242	27849.4		?	0	520	Calibration	-
923	10.035	28130.9		?	0	520	Calibration	-
924	10.0459	28150.6		?	0	520	Calibration	-
925	10.0568	27750.8		?	0	520	Calibration	-
926	10.0676	28048.7		?	0	520	Calibration	-
927	10.0785	28174.2		?	0	520	Calibration	-
928	10.0893	28099.6		?	0	520	Calibration	-
929	10.1002	28163.8		?	0	520	Calibration	-
930	10.1111	28113.7		?	0	520	Calibration	-
931	10.1219	28234.3		?	0	520	Calibration	-
932	10.1328	28294.8		?	0	520	Calibration	-
933	10.1436	27878.5		?	0	520	Calibration	-
934	10.1545	27966.8		?	0	520	Calibration	-
935	10.1654	28029.4		?	0	520	Calibration	-
936	10.1762	27871.3		?	0	520	Calibration	-
937	10.1871	28182.2		?	0	520	Calibration	-
938	10.1979	27870.6		?	0	520	Calibration	-
939	10.2088	28174.9		?	0	520	Calibration	-
940	10.2197	28338.4		?	0	520	Calibration	-
941	10.2305	28140.9		?	0	520	Calibration	-
942	10.2414	28100.8		?	0	520	Calibration	-
943	10.2523	28011.3		?	0	520	Calibration	-
944	10.2631	28131.9		?	0	520	Calibration	-
945	10.274	28009.4		?	0	520	Calibration	-
946	10.2848	28138.8		?	0	520	Calibration	-
947	10.2957	28019.4		?	0	520	Calibration	-
948	10.3066	27946.2		?	0	520	Calibration	-
949	10.3174	28194.4		?	0	520	Calibration	-
950	10.3283	27964.9		?	0	520	Calibration	-
951	10.3391	27968.4		?	0	520	Calibration	-
952	10.35	28359.8		?	0	520	Calibration	-
953	10.3609	28250.2		?	0	520	Calibration	-
954	10.3717	28084.2		?	0	520	Calibration	-
955	10.3826	28147.1		?	0	520	Calibration	-
956	10.3934	27960.6		?	0	520	Calibration	-
957	10.4043	27976.2		?	0	520	Calibration	-
958	10.4152	27927.6		?	0	520	Calibration	-
959	10.426	28016.6		?	0	520	Calibration	-
960	10.4369	28230.4		?	0	520	Calibration	-
961	10.4477	28171.6		?	0	520	Calibration	-
962	10.4586	28091.8		?	0	520	Calibration	-
963	10.4695	28141.9		?	0	520	Calibration	-
964	10.4803	28200.6		?	0	520	Calibration	-
965	10.4912	28201.8		?	0	520	Calibration	-
966	10.502	28196.6		?	0	520	Calibration	-
967	10.5129	28096.5		?	0	520	Calibration	-
968	10.5238	28100.5		?	0	520	Calibration	-
969	10.5346	27936.1		?	0	520	Calibration	-
970	10.5455	27914		?	0	520	Calibration	-
971	10.5563	28089.8		?	0	520	Calibration	-
972	10.5672	28184.8		?	0	520	Calibration	-
973	10.5781	28130.4		?	0	520	Calibration	-
974	10.5889	28221.6		?	0	520	Calibration	-
975	10.5998	28265.6		?	0	520	Calibration	-
976	10.6106	28060.9		?	0	520	Calibration	-
977	10.6215	28014.1		?	0	520	Calibration	-
978	10.6324	28071.3		?	0	520	Calibration	-
979	10.6432	28354.2		?	0	520	Calibration	-
980	10.6541	28079.3		?	0	520	Calibration	-
981	10.6649	28215		?	0	520	Calibration	-
982	10.6758	28293.2		?	0	520	Calibration	-
983	10.6867	28215.9		?	0	520	Calibration	-
984	10.6975	27958.4		?	0	520	Calibration	-
985	10.7084	28125.6		?	0	520	Calibration	-
986	10.7193	28063		?	0	520	Calibration	-
987	10.7301	28158.2		?	0	520	Calibration	-
988	10.741	28209.3		?	0	520	Calibration	-
989	10.7518	28010.4		?	0	520	Calibration	-
990	10.7627	27990.1		?	0	520	Calibration	-
991	10.7736	28203.2		?	0	520	Calibration	-
992	10.7844	27997.3		?	0	520	Calibration	-
993	10.7953	28302.8		?	0	520	Calibration	-
994	10.8061	28020.9		?	0	520	Calibration	-
995	10.817	27902.9		?	0	520	Calibration	-
996	10.8279	28100.8		?	0	520	Calibration	-
997	10.8387	28156.1		?	0	520	Calibration	-
998	10.8496	28273.9		?	0	520	Calibration	-
999	10.8604	28266.4		?	0	520	Calibration	-
1000	10.8713	27968.6		?	0	520	Calibration	-
1001	10.8822	28254.7		?	0	520	Calibration	-
1002	10.893	27806.3		?	0	520	Calibration	-
1003	10.9039	28006.9		?	0	520	Calibration	-
1004	10.9147	27971.3		?	0	520	Calibration	-
1005	10.9256	28094.9		?	0	520	Calibration	-
1006	10.9365	28148.6		?	0	520	Calibration	-
1007	10.9473	28151		?	0	520	Calibration	-
1008	10.9582	28143.8		?	0	520	Calibration	-
1009	10.969	28088.8		?	0	520	Calibration	-
1010	10.9799	27919.8		?	0	520	Calibration	-
1011	10.9908	28103.2		?	0	520	Calibration	-
1012	11.0016	27953.8		?	0	520	Calibration	-
1013	11.0125	28157.5		?	0	520	Calibration	-
1014	11.0233	27972.1		?	0	520	Calibration	-
1015	11.0342	27961.6		?	0	520	Calibration	-
1016	11.0451	27971		?	0	520	Calibration	-
1017	11.0559	27779.2		?	0	520	Calibration	-
1018	11.0668	28013		?	0	520	Calibration	-
1019	11.0776	28216.4		?	0	520	Calibration	-
1020	11.0885	27987.6		?	0	520	Calibration	-
1021	11.0994	28106.5		?	0	520	Calibration	-
1022	11.1102	27939.2		?	0	520	Calibration	-
1023	11.1211	28034		?	0	520	Calibration	-
1024	11.1319	27834.9		?	0	520	Calibration	-
1025	11.1428	28075.2		?	0	520	Calibration	-
1026	11.1537	27984.5		?	0	520	Calibration	-
1027	11.1645	28033.3		?	0	520	Calibration	-
1028	11.1754	28047.9		?	0	520	Calibration	-
1029	11.1862	28040.2		?	0	520	Calibration	-
1030	11.1971	27894.8		?	0	520	Calibration	-
1031	11.208	28068.3		?	0	520	Calibration	-
1032	11.2188	27963.1		?	0	520	Calibration	-
1033	11.2297	28059.9		?	0	520	Calibration	-
1034	11.2406	28171.1		?	0	520	Calibration	-
1035	11.2514	28067.8		?	0	520	Calibration	-
1036	11.2623	28220.5		?	0	520	Calibration	-
1037	11.2731	28171.4		?	0	520	Calibration	-
1038	11.284	28224		?	0	520	Calibration	-
1039	11.2949	28062		?	0	520	Calibration	-
1040	11.3057	28048.9		?	0	520	Calibration	-
1041	11.3166	28162.1		?	0	520	Calibration	-
1042	11.3274	28166.3		?	0	520	Calibration	-
1043	11.3383	28033.9		?	0	520	Calibration	-
1044	11.3492	27935.4		?	0	520	Calibration	-
1045	11.36	28139.2		?	0	520	Calibration	-
1046	11.3709	27988.9		?	0	520	Calibration	-
1047	11.3817	27916.2		?	0	520	Calibration	-
1048	11.3926	27726.4		?	0	520	Calibration	-
1049	11.4035	28013.4		?	0	520	Calibration	-
1050	11.4143	27935.1		?	0	520	Calibration	-
1051	11.4252	28077.6		?	0	520	Calibration	-
1052	11.436	28042.9		?	0	520	Calibration	-
1053	11.4469	28089.8		?	0	520	Calibration	-
1054	11.4578	28066.4		?	0	520	Calibration	-
1055	11.4686	28013.2		?	0	520	Calibration	-
1056	11.4795	28077.6		?	0	520	Calibration	-
1057	11.4903	28166.2		?	0	520	Calibration	-
1058	11.5012	27947.9		?	0	520	Calibration	-
1059	11.5121	28030.9		?	0	520	Calibration	-
1060	11.5229	27940.4		?	0	520	Calibration	-
1061	11.5338	27938.9		?	0	520	Calibration	-
1062	11.5446	28172.8		?	0	520	Calibration	-
1063	11.5555	28217.6		?	0	520	Calibration	-
1064	11.5664	27821		?	0	520	Calibration	-
1065	11.5772	28105.2		?	0	520	Calibration	-
1066	11.5881	27914.9		?	0	520	Calibration	-
1067	11.5989	27902.2		?	0	520	Calibration	-
1068	11.6098	27819.1		?	0	520	Calibration	-
1069	11.6207	27993.8		?	0	520	Calibration	-
1070	11.6315	28142.6		?	0	520	Calibration	-
1071	11.6424	27804.8		?	0	520	Calibration	-
1072	11.6532	27987.2		?	0	520	Calibration	-
1073	11.6641	27943.7		?	0	520	Calibration	-
1074	11.675	27994.2		?	0	520	Calibration	-
1075	11.6858	28032.1		?	0	520	Calibration	-
1076	11.6967	27778.8		?	0	520	Calibration	-
1077	11.7076	27895.2		?	0	520	Calibration	-
1078	11.7184	28067.5		?	0	520	Calibration	-
1079	11.7293	28320.8		?	0	520	Calibration	-
1080	11.7401	28132.6		?	0	520	Calibration	-
1081	11.751	28108.3		?	0	520	Calibration	-
1082	11.7619	28197.4		?	0	520	Calibration	-
1083	11.7727	27967.9		?	0	520	Calibration	-
1084	11.7836	28203.1		?	0	520	Calibration	-
1085	11.7944	28231.8		?	0	520	Calibration	-
1086	11.8053	27925.8		?	0	520	Calibration	-
1087	11.8162	28050.1		?	0	520	Calibration	-
1088	11.827	28010.6		?	0	520	Calibration	-
1089	11.8379	28197.9		?	0	520	Calibration	-
1090	11.8487	28191.8		?	0	520	Calibration	-
1091	11.8596	28311.8		?	0	520	Calibration	-
1092	11.8705	28072.9		?	0	520	Calibration	-
1093	11.8813	28154.1		?	0	520	Calibration	-
1094	11.8922	28252.5		?	0	520	Calibration	-
1095	11.903	28108.5		?	0	520	Calibration	-
1096	11.9139	28001.9		?	0	520	Calibration	-
1097	11.9248	27970.2		?	0	520	Calibration	-
1098	11.9356	28148.1		?	0	520	Calibration	-
1099	11.9465	27910.9		?	0	520	Calibration	-
1100	11.9573	28187.1		?	0	520	Calibration	-
1101	11.9682	28020.6		?	0	520	Calibration	-
1102	11.9791	28349.6		?	0	520	Calibration	-
1103	11.9899	28272.9		?	0	520	Calibration	-
1104	12.0008	28024.6		?	0	520	Calibration	-
1105	12.0116	28140.9		?	0	520	Calibration	-
1106	12.0225	28022.9		?	0	520	Calibration	-
1107	12.0334	28225.6		?	0	520	Calibration	-
1108	12.0442	28061.8		?	0	520	Calibration	-
1109	12.0551	27826.9		?	0	520	Calibration	-
1110	12.0659	28020.2		?	0	520	Calibration	-
1111	12.0768	28067.8		?	0	520	Calibration	-
1112	12.0877	28019.1		?	0	520	Calibration	-
1113	12.0985	27899.4		?	0	520	Calibration	-
1114	12.1094	28088.8		?	0	520	Calibration	-
1115	12.1202	28121.4		?	0	520	Calibration	-
1116	12.1311	28091.1		?	0	520	Calibration	-
1117	12.142	28149.4		?	0	520	Calibration	-
1118	12.1528	28010.4		?	0	520	Calibration	-
1119	12.1637	28078.2		?	0	520	Calibration	-
1120	12.1745	27976.4		?	0	520	Calibration	-
1121	12.1854	27889.2		?	0	520	Calibration	-
1122	12.1963	27853.8		?	0	520	Calibration	-
1123	12.2071	28073.2		?	0	520	Calibration	-
1124	12.218	28029.9		?	0	520	Calibration	-
1125	12.2289	28263.6		?	0	520	Calibration	-
1126	12.2397	28098.1		?	0	520	Calibration	-
1127	12.2506	27977.6		?	0	520	Calibration	-
1128	12.2614	28174.1		?	0	520	Calibration	-
1129	12.2723	28174.9		?	0	520	Calibration	-
1130	12.2832	27968.1		?	0	520	Calibration	-
1131	12.294	28110.2		?	0	520	Calibration	-
1132	12.3049	28003.1		?	0	520	Calibration	-
1133	12.3157	28168.6		?	0	520	Calibration	-
1134	12.3266	28106.5		?	0	520	Calibration	-
1135	12.3375	28485.7		?	0	520	Calibration	-
1136	12.3483	28046.1		?	0	520	Calibration	-
1137	12.3592	28083		?	0	520	Calibration	-
1138	12.37	28101.5		?	0	520	Calibration	-
1139	12.3809	27863.6		?	0	520	Calibration	-
1140	12.3918	28136.4		?	0	520	Calibration	-
1141	12.4026	27842.1		?	0	520	Calibration	-
1142	12.4135	28115		?	0	520	Calibration	-
1143	12.4243	28143.6		?	0	520	Calibration	-
1144	12.4352	28127.1		?	0	520	Calibration	-
1145	12.4461	28178.1		?	0	520	Calibration	-
1146	12.4569	27981.2		?	0	520	Calibration	-
1147	12.4678	28084.1		?	0	520	Calibration	-
1148	12.4786	28102		?	0	520	Calibration	-
1149	12.4895	28031.4		?	0	520	Calibration	-
1150	12.5004	28201.9		?	0	520	Calibration	-
1151	12.5112	28002.1		?	0	520	Calibration	-
1152	12.5221	28200.2		?	0	520	Calibration	-
1153	12.5329	27900.9		?	0	520	Calibration	-
1154	12.5438	28095		?	0	520	Calibration	-
1155	12.5547	28204.1		?	0	520	Calibration	-
1156	12.5655	28145.4		?	0	520	Calibration	-
1157	12.5764	28171.8		?	0	520	Calibration	-
1158	12.5872	28221.2		?	0	520	Calibration	-
1159	12.5981	27966.5		?	0	520	Calibration	-
1160	12.609	28177.7		?	0	520	Calibration	-
1161	12.6198	28162.6		?	0	520	Calibration	-
1162	12.6307	28532.1		?	0	520	Calibration	-
1163	12.6415	28220.8		?	0	520	Calibration	-
1164	12.6524	28105.8		?	0	520	Calibration	-
1165	12.6633	28200.6		?	0	520	Calibration	-
1166	12.6741	28355		?	0	520	Calibration	-
1167	12.685	28120.6		?	0	520	Calibration	-
1168	12.6958	28044.3		?	0	520	Calibration	-
1169	12.7067	27928.6		?	0	520	Calibration	-
1170	12.7176	28161.1		?	0	520	Calibration	-
1171	12.7284	27993.8		?	0	520	Calibration	-
1172	12.7393	27984.3		?	0	520	Calibration	-
1173	12.7502	28000		?	0	520	Calibration	-
1174	12.761	28150.8		?	0	520	Calibration	-
1175	12.7719	28179.2		?	0	520	Calibration	-
1176	12.7827	28146.6		?	0	520	Calibration	-
1177	12.7936	28027.3		?	0	520	Calibration	-
1178	12.8045	28246.2		?	0	520	Calibration	-
1179	12.8153	28012.9		?	0	520	Calibration	-
1180	12.8262	28337.6		?	0	520	Calibration	-
1181	12.837	28415.8		?	0	520	Calibration	-
1182	12.8479	28328.7		?	0	520	Calibration	-
1183	12.8588	28385.4		?	0	520	Calibration	-
1184	12.8696	28088.3		?	0	520	Calibration	-
1185	12.8805	28186.5		?	0	520	Calibration	-
1186	12.8913	28156.9		?	0	520	Calibration	-
1187	12.9022	28370.9		?	0	520	Calibration	-
1188	12.9131	28240.3		?	0	520	Calibration	-
1189	12.9239	28143.3		?	0	520	Calibration	-
1190	12.9348	28169.7		?	0	520	Calibration	-
1191	12.9456	28207		?	0	520	Calibration	-
1192	12.9565	28238		?	0	520	Calibration	-
1193	12.9674	27937.2		?	0	520	Calibration	-
1194	12.9782	28141.9		?	0	520	Calibration	-
1195	12.9891	28416.2		?	0	520	Calibration	-
1196	12.9999	28168.3		?	0	520	Calibration	-
1197	13.0108	28184.1		?	0	520	Calibration	-
1198	13.0217	28388.1		?	0	520	Calibration	-
1199	13.0325	28309.2		?	0	520	Calibration	-
1200	13.0434	28291.1		?	0	520	Calibration	-
1201	13.0542	28198.8		?	0	520	Calibration	-
1202	13.0651	28082.5		?	0	520	Calibration	-
1203	13.076	28363.2		?	0	520	Calibration	-
1204	13.0868	28395		?	0	520	Calibration	-
1205	13.0977	28515.7		?	0	520	Calibration	-
1206	13.1085	28127.9		?	0	520	Calibration	-
1207	13.1194	28283.1		?	0	520	Calibration	-
1208	13.1303	27952.2		?	0	520	Calibration	-
1209	13.1411	28402.3		?	0	520	Calibration	-
1210	13.152	28349.8		?	0	520	Calibration	-
1211	13.1628	28320.3		?	0	520	Calibration	-
1212	13.1737	28383.2		?	0	520	Calibration	-
1213	13.1846	28223.4		?	0	520	Calibration	-
1214	13.1954	28319.9		?	0	520	Calibration	-
1215	13.2063	28413.4		?	0	520	Calibration	-
1216	13.2172	28576.6		?	0	520	Calibration	-
1217	13.228	28279.6		?	0	520	Calibration	-
1218	13.2389	28248.2		?	0	520	Calibration	-
1219	13.2497	28223.3		?	0	520	Calibration	-
1220	13.2606	28336.6		?	0	520	Calibration	-
1221	13.2715	28391		?	0	520	Calibration	-
1222	13.2823	28313.1		?	0	520	Calibration	-
1223	13.2932	28258.4		?	0	520	Calibration	-
1224	13.304	28128.1		?	0	520	Calibration	-
1225	13.3149	28076.7		?	0	520	Calibration	-
1226	13.3258	28192.1		?	0	520	Calibration	-
1227	13.3366	28028.1		?	0	520	Calibration	-
1228	13.3475	28129.8		?	0	520	Calibration	-
1229	13.3583	28108.1		?	0	520	Calibration	-
1230	13.3692	28352.6		?	0	520	Calibration	-
1231	13.3801	28305.8		?	0	520	Calibration	-
1232	13.3909	28040		?	0	520	Calibration	-
1233	13.4018	28308.4		?	0	520	Calibration	-
1234	13.4126	28133.9		?	0	520	Calibration	-
1235	13.4235	28239.7		?	0	520	Calibration	-
1236	13.4344	28188.8		?	0	520	Calibration	-
1237	13.4452	28334.8		?	0	520	Calibration	-
1238	13.4561	28202.2		?	0	520	Calibration	-
1239	13.4669	28122.9		?	0	520	Calibration	-
1240	13.4778	28090.9		?	0	520	Calibration	-
1241	13.4887	28085.4		?	0	520	Calibration	-
1242	13.4995	28100.4		?	0	520	Calibration	-
1243	13.5104	28168.4		?	0	520	Calibration	-
1244	13.5212	28326.6		?	0	520	Calibration	-
1245	13.5321	27991.9		?	0	520	Calibration	-
1246	13.543	28234.8		?	0	520	Calibration	-
1247	13.5538	28392.2		?	0	520	Calibration	-
1248	13.5647	28327.2		?	0	520	Calibration	-
1249	13.5755	28306.8		?	0	520	Calibration	-
1250	13.5864	28400.3		?	0	520	Calibration	-
1251	13.5973	28008.3		?	0	520	Calibration	-
1252	13.6081	28178.5		?	0	520	Calibration	-
1253	13.619	28223.8		?	0	520	Calibration	-
1254	13.6298	28219.7		?	0	520	Calibration	-
1255	13.6407	28302		?	0	520	Calibration	-
1256	13.6516	28306.2		?	0	520	Calibration	-
1257	13.6624	28367		?	0	520	Calibration	-
1258	13.6733	28068.8		?	0	520	Calibration	-
1259	13.6841	28227.9		?	0	520	Calibration	-
1260	13.695	28237.4		?	0	520	Calibration	-
1261	13.7059	28093.8		?	0	520	Calibration	-
1262	13.7167	28119.4		?	0	520	Calibration	-
1263	13.7276	28266.2		?	0	520	Calibration	-
1264	13.7385	28118.8		?	0	520	Calibration	-
1265	13.7493	28215.6		?	0	520	Calibration	-
1266	13.7602	28086.6		?	0	520	Calibration	-
1267	13.771	28371.2		?	0	520	Calibration	-
1268	13.7819	28093.2		?	0	520	Calibration	-
1269	13.7928	28379.9		?	0	520	Calibration	-
1270	13.8036	28231.2		?	0	520	Calibration	-
1271	13.8145	28276		?	0	520	Calibration	-
1272	13.8253	28359.6		?	0	520	Calibration	-
1273	13.8362	28285.8		?	0	520	Calibration	-
1274	13.8471	28253.6		?	0	520	Calibration	-
1275	13.8579	28088.4		?	0	520	Calibration	-
1276	13.8688	28333		?	0	520	Calibration	-
1277	13.8796	28275.2		?	0	520	Calibration	-
1278	13.8905	28294		?	0	520	Calibration	-
1279	13.9014	28159.2		?	0	520	Calibration	-
1280	13.9122	28189.8		?	0	520	Calibration	-
1281	13.9231	27836		?	0	520	Calibration	-
1282	13.9339	28093.3		?	0	520	Calibration	-
1283	13.9448	27916.8		?	0	520	Calibration	-
1284	13.9557	28262.2		?	0	520	Calibration	-
1285	13.9665	28000.1		?	0	520	Calibration	-
1286	13.9774	28205.9		?	0	520	Calibration	-
1287	13.9882	28109		?	0	520	Calibration	-
1288	13.9991	28066.1		?	0	520	Calibration	-
1289	14.01	28062.8		?	0	520	Calibration	-
1290	14.0208	27899.4		?	0	520	Calibration	-
1291	14.0317	27865.9		?	0	520	Calibration	-
1292	14.0425	27830.6		?	0	520	Calibration	-
1293	14.0534	28140.7		?	0	520	Calibration	-
1294	14.0643	28003.3		?	0	520	Calibration	-
1295	14.0751	28114.6		?	0	520	Calibration	-
1296	14.086	27945.9		?	0	520	Calibration	-
1297	14.0968	28133.9		?	0	520	Calibration	-
1298	14.1077	27967.5		?	0	520	Calibration	-
1299	14.1186	27799		?	0	520	Calibration	-
1300	14.1294	28041.3		?	0	520	Calibration	-
1301	14.1403	28228.4		?	0	520	Calibration	-
1302	14.1511	28037.1		?	0	520	Calibration	-
1303	14.162	28182.9		?	0	520	Calibration	-
1304	14.1729	27820.4		?	0	520	Calibration	-
1305	14.1837	27953.4		?	0	520	Calibration	-
1306	14.1946	27977.9		?	0	520	Calibration	-
1307	14.2055	27999.5		?	0	520	Calibration	-
1308	14.2163	27774.8		?	0	520	Calibration	-
1309	14.2272	28169.6		?	0	520	Calibration	-
1310	14.238	28138.2		?	0	520	Calibration	-
1311	14.2489	27807.8		?	0	520	Calibration	-
1312	14.2598	28002.9		?	0	520	Calibration	-
1313	14.2706	28012.6		?	0	520	Calibration	-
1314	14.2815	27980.6		?	0	520	Calibration	-
1315	14.2923	28066.4		?	0	520	Calibration	-
1316	14.3032	27948.9		?	0	520	Calibration	-
1317	14.3141	28070.9		?	0	520	Calibration	-
1318	14.3249	27906.1		?	0	520	Calibration	-
1319	14.3358	27942.4		?	0	520	Calibration	-
1320	14.3466	28039.2		?	0	520	Calibration	-
1321	14.3575	27944.3		?	0	520	Calibration	-
1322	14.3684	27895.7		?	0	520	Calibration	-
1323	14.3792	28054.8		?	0	520	Calibration	-
1324	14.3901	27909.8		?	0	520	Calibration	-
1325	14.4009	27966.8		?	0	520	Calibration	-
1326	14.4118	27988.1		?	0	520	Calibration	-
1327	14.4227	27837.5		?	0	520	Calibration	-
1328	14.4335	27811.2		?	0	520	Calibration	-
1329	14.4444	28122.6		?	0	520	Calibration	-
1330	14.4552	27754.1		?	0	520	Calibration	-
1331	14.4661	27948.4		?	0	520	Calibration	-
1332	14.477	28113.2		?	0	520	Calibration	-
1333	14.4878	27842.7		?	0	520	Calibration	-
1334	14.4987	27886.4		?	0	520	Calibration	-
1335	14.5095	27947.6		?	0	520	Calibration	-
1336	14.5204	27869.5		?	0	520	Calibration	-
1337	14.5313	27776.3		?	0	520	Calibration	-
1338	14.5421	27913.1		?	0	520	Calibration	-
1339	14.553	27961.1		?	0	520	Calibration	-
1340	14.5638	27826.5		?	0	520	Calibration	-
1341	14.5747	27796.5		?	0	520	Calibration	-
1342	14.5856	28118.4		?	0	520	Calibration	-
1343	14.5964	27751.5		?	0	520	Calibration	-
1344	14.6073	27820.8		?	0	520	Calibration	-
1345	14.6181	27861.3		?	0	520	Calibration	-
1346	14.629	27701.1		?	0	520	Calibration	-
1347	14.6399	27927.8		?	0	520	Calibration	-
1348	14.6507	27840.7		?	0	520	Calibration	-
1349	14.6616	27918.1		?	0	520	Calibration	-
1350	14.6724	27822.1		?	0	520	Calibration	-
1351	14.6833	28035.1		?	0	520	Calibration	-
1352	14.6942	28130.7		?	0	520	Calibration	-
1353	14.705	28099.1		?	0	520	Calibration	-
1354	14.7159	27844.2		?	0	520	Calibration	-
1355	14.7268	28123.2		?	0	520	Calibration	-
1356	14.7376	28095.4		?	0	520	Calibration	-
1357	14.7485	28122.9		?	0	520	Calibration	-
1358	14.7593	28101.9		?	0	520	Calibration	-
1359	14.7702	27958.1		?	0	520	Calibration	-
1360	14.7811	28037.4		?	0	520	Calibration	-
1361	14.7919	27662.9		?	0	520	Calibration	-
1362	14.8028	28171.2		?	0	520	Calibration	-
1363	14.8136	27976.1		?	0	520	Calibration	-
1364	14.8245	27893.9		?	0	520	Calibration	-
1365	14.8354	27839.8		?	0	520	Calibration	-
1366	14.8462	27878.6		?	0	520	Calibration	-
1367	14.8571	27929		?	0	520	Calibration	-
1368	14.8679	27867.1		?	0	520	Calibration	-
1369	14.8788	27762.9		?	0	520	Calibration	-
1370	14.8897	27866.2		?	0	520	Calibration	-
1371	14.9005	27778.5		?	0	520	Calibration	-
1372	14.9114	27942.4		?	0	520	Calibration	-
1373	14.9222	27714.6		?	0	520	Calibration	-
1374	14.9331	28002.4		?	0	520	Calibration	-
1375	14.944	27942.1		?	0	520	Calibration	-
1376	14.9548	27969.5		?	0	520	Calibration	-
1377	14.9657	27813.9		?	0	520	Calibration	-
1378	14.9765	27974.4		?	0	520	Calibration	-
1379	14.9874	27679		?	0	520	Calibration	-
1380	14.9983	27882.5		?	0	520	Calibration	-
1381	15.0091	27989.4		?	0	520	Calibration	-
1382	15.02	28156.7		?	0	520	Calibration	-
1383	15.0308	28019.1		?	0	520	Calibration	-
1384	15.0417	27595.8		?	0	520	Calibration	-
1385	15.0526	27566.6		?	0	520	Calibration	-
1386	15.0634	27907.9		?	0	520	Calibration	-
1387	15.0743	27826.8		?	0	520	Calibration	-
1388	15.0851	27753.1		?	0	520	Calibration	-
1389	15.096	27946.1		?	0	520	Calibration	-
1390	15.1069	27876.8		?	0	520	Calibration	-
1391	15.1177	27743.5		?	0	520	Calibration	-
1392	15.1286	27910.4		?	0	520	Calibration	-
1393	15.1394	27999.4		?	0	520	Calibration	-
1394	15.1503	27799.3		?	0	520	Calibration	-
1395	15.1612	27796.9		?	0	520	Calibration	-
1396	15.172	27680.9		?	0	520	Calibration	-
1397	15.1829	27955.6		?	0	520	Calibration	-
1398	15.1938	27844.4		?	0	520	Calibration	-
1399	15.2046	27881.1		?	0	520	Calibration	-
1400	15.2155	27869.2		?	0	520	Calibration	-
1401	15.2263	27628.4		?	0	520	Calibration	-
1402	15.2372	27668.9		?	0	520	Calibration	-
1403	15.2481	27701.6		?	0	520	Calibration	-
1404	15.2589	27730.9		?	0	520	Calibration	-
1405	15.2698	27672.1		?	0	520	Calibration	-
1406	15.2806	28007		?	0	520	Calibration	-
1407	15.2915	27907.9		?	0	520	Calibration	-
1408	15.3024	27795.1		?	0	520	Calibration	-
1409	15.3132	28067.7		?	0	520	Calibration	-
1410	15.3241	27907.3		?	0	520	Calibration	-
1411	15.3349	27719.9		?	0	520	Calibration	-
1412	15.3458	27758		?	0	520	Calibration	-
1413	15.3567	27880.8		?	0	520	Calibration	-
1414	15.3675	27767.1		?	0	520	Calibration	-
1415	15.3784	27734.2		?	0	520	Calibration	-
1416	15.3892	27877.8		?	0	520	Calibration	-
1417	15.4001	27911.8		?	0	520	Calibration	-
1418	15.411	27905.3		?	0	520	Calibration	-
1419	15.4218	28032.5		?	0	520	Calibration	-
1420	15.4327	27772.9		?	0	520	Calibration	-
1421	15.4435	27705.8		?	0	520	Calibration	-
1422	15.4544	27691.9		?	0	520	Calibration	-
1423	15.4653	27721.9		?	0	520	Calibration	-
1424	15.4761	27625.6		?	0	520	Calibration	-
1425	15.487	27859.3		?	0	520	Calibration	-
1426	15.4978	27689.2		?	0	520	Calibration	-
1427	15.5087	27887.1		?	0	520	Calibration	-
1428	15.5196	27760.1		?	0	520	Calibration	-
1429	15.5304	27608.1		?	0	520	Calibration	-
1430	15.5413	27823.2		?	0	520	Calibration	-
1431	15.5521	27699.8		?	0	520	Calibration	-
1432	15.563	27698.8		?	0	520	Calibration	-
1433	15.5739	27893.1		?	0	520	Calibration	-
1434	15.5847	27938.8		?	0	520	Calibration	-
1435	15.5956	27860.1		?	0	520	Calibration	-
1436	15.6064	27703.1		?	0	520	Calibration	-
1437	15.6173	27904.7		?	0	520	Calibration	-
1438	15.6282	27729.3		?	0	520	Calibration	-
1439	15.639	27699.2		?	0	520	Calibration	-
1440	15.6499	27973.2		?	0	520	Calibration	-
1441	15.6607	27941.6		?	0	520	Calibration	-
1442	15.6716	27609.9		?	0	520	Calibration	-
1443	15.6825	27807.5		?	0	520	Calibration	-
1444	15.6933	27814.6		?	0	520	Calibration	-
1445	15.7042	27674.6		?	0	520	Calibration	-
1446	15.7151	27763.8		?	0	520	Calibration	-
1447	15.7259	27773		?	0	520	Calibration	-
1448	15.7368	27699.7		?	0	520	Calibration	-
1449	15.7476	28060.9		?	0	520	Calibration	-
1450	15.7585	27695.6		?	0	520	Calibration	-
1451	15.7694	27743.4		?	0	520	Calibration	-
1452	15.7802	27733.9		?	0	520	Calibration	-
1453	15.7911	27952.1		?	0	520	Calibration	-
1454	15.8019	27832.4		?	0	520	Calibration	-
1455	15.8128	27846.2		?	0	520	Calibration	-
1456	15.8237	27527.9		?	0	520	Calibration	-
1457	15.8345	27674.2		?	0	520	Calibration	-
1458	15.8454	27694.2		?	0	520	Calibration	-
1459	15.8562	27833.8		?	0	520	Calibration	-
1460	15.8671	27857.9		?	0	520	Calibration	-
1461	15.878	27635.1		?	0	520	Calibration	-
1462	15.8888	27867.8		?	0	520	Calibration	-
1463	15.8997	27688.1		?	0	520	Calibration	-
1464	15.9105	27809.2		?	0	520	Calibration	-
1465	15.9214	27689		?	0	520	Calibration	-
1466	15.9323	27853.1		?	0	520	Calibration	-
1467	15.9431	27660.1		?	0	520	Calibration	-
1468	15.954	27727		?	0	520	Calibration	-
1469	15.9648	27624.3		?	0	520	Calibration	-
1470	15.9757	27866.9		?	0	520	Calibration	-
1471	15.9866	27975.8		?	0	520	Calibration	-
1472	15.9974	27824.2		?	0	520	Calibration	-
1473	16.0083	27739.9		?	0	520	Calibration	-
1474	16.0191	27657.2		?	0	520	Calibration	-
1475	16.03	27670		?	0	520	Calibration	-
1476	16.0409	27898		?	0	520	Calibration	-
1477	16.0517	27888.2		?	0	520	Calibration	-
1478	16.0626	27753.2		?	0	520	Calibration	-
1479	16.0734	27692.5		?	0	520	Calibration	-
1480	16.0843	27805.4		?	0	520	Calibration	-
1481	16.0952	27674.2		?	0	520	Calibration	-
1482	16.106	27809		?	0	520	Calibration	-
1483	16.1169	27860.9		?	0	520	Calibration	-
1484	16.1277	27919.1		?	0	520	Calibration	-
1485	16.1386	27553.9		?	0	520	Calibration	-
1486	16.1495	27857.1		?	0	520	Calibration	-
1487	16.1603	27809.3		?	0	520	Calibration	-
1488	16.1712	27671.8		?	0	520	Calibration	-
1489	16.182	27607.2		?	0	520	Calibration	-
1490	16.1929	27831.2		?	0	520	Calibration	-
1491	16.2038	27500.6		?	0	520	Calibration	-
1492	16.2146	27824.4		?	0	520	Calibration	-
1493	16.2255	27829.2		?	0	520	Calibration	-
1494	16.2364	27715.2		?	0	520	Calibration	-
1495	16.2472	27629.7		?	0	520	Calibration	-
1496	16.2581	27975.8		?	0	520	Calibration	-
1497	16.2689	27968.2		?	0	520	Calibration	-
1498	16.2798	27886.6		?	0	520	Calibration	-
1499	16.2907	27752.5		?	0	520	Calibration	-
1500	16.3015	27709.1		?	0	520	Calibration	-
1501	16.3124	27862.9		?	0	520	Calibration	-
1502	16.3232	27975.2		?	0	520	Calibration	-
1503	16.3341	27771.9		?	0	520	Calibration	-
1504	16.345	27839.9		?	0	520	Calibration	-
1505	16.3558	27860.6		?	0	520	Calibration	-
1506	16.3667	27647.8		?	0	520	Calibration	-
1507	16.3775	27547.9		?	0	520	Calibration	-
1508	16.3884	27678.4		?	0	520	Calibration	-
1509	16.3993	27659.8		?	0	520	Calibration	-
1510	16.4101	27754.3		?	0	520	Calibration	-
1511	16.421	27660.1		?	0	520	Calibration	-
1512	16.4318	27495.8		?	0	520	Calibration	-
1513	16.4427	27486.1		?	0	520	Calibration	-
1514	16.4536	27528.2		?	0	520	Calibration	-
1515	16.4644	27692.1		?	0	520	Calibration	-
1516	16.4753	27752.2		?	0	520	Calibration	-
1517	16.4861	27692.6		?	0	520	Calibration	-
1518	16.497	27462.4		?	0	520	Calibration	-
1519	16.5079	27818.1		?	0	520	Calibration	-
1520	16.5187	27793.1		?	0	520	Calibration	-
1521	16.5296	27640.9		?	0	520	Calibration	-
1522	16.5404	27547.5		?	0	520	Calibration	-
1523	16.5513	27803.7		?	0	520	Calibration	-
1524	16.5622	27654.7		?	0	520	Calibration	-
1525	16.573	27660.8		?	0	520	Calibration	-
1526	16.5839	27769.5		?	0	520	Calibration	-
1527	16.5947	27752.1		?	0	520	Calibration	-
1528	16.6056	27705.9		?	0	520	Calibration	-
1529	16.6165	27656.4		?	0	520	Calibration	-
1530	16.6273	27538.4		?	0	520	Calibration	-
1531	16.6382	27448.8		?	0	520	Calibration	-
1532	16.649	27520.8		?	0	520	Calibration	-
1533	16.6599	27618.4		?	0	520	Calibration	-
1534	16.6708	27709.8		?	0	520	Calibration	-
1535	16.6816	27413.6		?	0	520	Calibration	-
1536	16.6925	27675.2		?	0	520	Calibration	-
1537	16.7034	27786.1		?	0	520	Calibration	-
1538	16.7142	27691.1		?	0	520	Calibration	-
1539	16.7251	27491.7		?	0	520	Calibration	-
1540	16.7359	27601.5		?	0	520	Calibration	-
1541	16.7468	27518.9		?	0	520	Calibration	-
1542	16.7577	27320.8		?	0	520	Calibration	-
1543	16.7685	27426.9		?	0	520	Calibration	-
1544	16.7794	27533.6		?	0	520	Calibration	-
1545	16.7902	27328.3		?	0	520	Calibration	-
1546	16.8011	27577.8		?	0	520	Calibration	-
1547	16.812	27641.5		?	0	520	Calibration	-
1548	16.8228	27613.4		?	0	520	Calibration	-
1549	16.8337	27587.2		?	0	520	Calibration	-
1550	16.8445	27654.3		?	0	520	Calibration	-
1551	16.8554	27411.4		?	0	520	Calibration	-
1552	16.8663	27392.7		?	0	520	Calibration	-
1553	16.8771	27597.8		?	0	520	Calibration	-
1554	16.888	27507.8		?	0	520	Calibration	-
1555	16.8988	27777.6		?	0	520	Calibration	-
1556	16.9097	27602		?	0	520	Calibration	-
1557	16.9206	27499.5		?	0	520	Calibration	-
1558	16.9314	27607.8		?	0	520	Calibration	-
1559	16.9423	27575.6		?	0	520	Calibration	-
1560	16.9531	27659.7		?	0	520	Calibration	-
1561	16.964	27615.1		?	0	520	Calibration	-
1562	16.9749	27508.1		?	0	520	Calibration	-
1563	16.9857	27592.9		?	0	520	Calibration	-
1564	16.9966	27676.9		?	0	520	Calibration	-
1565	17.0074	27505.2		?	0	520	Calibration	-
1566	17.0183	27534.8		?	0	520	Calibration	-
1567	17.0292	27542.1		?	0	520	Calibration	-
1568	17.04	27684.1		?	0	520	Calibration	-
1569	17.0509	27676		?	0	520	Calibration	-
1570	17.0617	27620.1		?	0	520	Calibration	-
1571	17.0726	27344.1		?	0	520	Calibration	-
1572	17.0835	27713.8		?	0	520	Calibration	-
1573	17.0943	27430.4		?	0	520	Calibration	-
1574	17.1052	27742.9		?	0	520	Calibration	-
1575	17.116	27851.5		?	0	520	Calibration	-
1576	17.1269	27513.6		?	0	520	Calibration	-
1577	17.1378	27584		?	0	520	Calibration	-
1578	17.1486	27528.4		?	0	520	Calibration	-
1579	17.1595	27366.1		?	0	520	Calibration	-
1580	17.1703	27588.6		?	0	520	Calibration	-
1581	17.1812	27589.8		?	0	520	Calibration	-
1582	17.1921	27779.4		?	0	520	Calibration	-
1583	17.2029	27685.4		?	0	520	Calibration	-
1584	17.2138	27649.9		?	0	520	Calibration	-
1585	17.2247	27466.6		?	0	520	Calibration	-
1586	17.2355	27568.8		?	0	520	Calibration	-
1587	17.2464	27463		?	0	520	Calibration	-
1588	17.2572	27729.1		?	0	520	Calibration	-
1589	17.2681	27709.8		?	0	520	Calibration	-
1590	17.279	27755.3		?	0	520	Calibration	-
1591	17.2898	27627.1		?	0	520	Calibration	-
1592	17.3007	27571.1		?	0	520	Calibration	-
1593	17.3115	27440.2		?	0	520	Calibration	-
1594	17.3224	27571.6		?	0	520	Calibration	-
1595	17.3333	27448.1		?	0	520	Calibration	-
1596	17.3441	27405.9		?	0	520	Calibration	-
1597	17.355	27607.4		?	0	520	Calibration	-
1598	17.3658	27577		?	0	520	Calibration	-
1599	17.3767	27671		?	0	520	Calibration	-
1600	17.3876	27654.7		?	0	520	Calibration	-
1601	17.3984	27662.2		?	0	520	Calibration	-
1602	17.4093	27610.1		?	0	520	Calibration	-
1603	17.4201	27856.4		?	0	520	Calibration	-
1604	17.431	27556.7		?	0	520	Calibration	-
1605	17.4419	27515		?	0	520	Calibration	-
1606	17.4527	27441.2		?	0	520	Calibration	-
1607	17.4636	27427.6		?	0	520	Calibration	-
1608	17.4744	27466.5		?	0	520	Calibration	-
1609	17.4853	27699		?	0	520	Calibration	-
1610	17.4962	27572.3		?	0	520	Calibration	-
1611	17.507	27597.9		?	0	520	Calibration	-
1612	17.5179	27522.1		?	0	520	Calibration	-
1613	17.5287	27477.1		?	0	520	Calibration	-
1614	17.5396	27581.8		?	0	520	Calibration	-
1615	17.5505	27506.5		?	0	520	Calibration	-
1616	17.5613	27693.5		?	0	520	Calibration	-
1617	17.5722	27472.5		?	0	520	Calibration	-
1618	17.583	27715.4		?	0	520	Calibration	-
1619	17.5939	27502.6		?	0	520	Calibration	-
1620	17.6048	27515.8		?	0	520	Calibration	-
1621	17.6156	27700.8		?	0	520	Calibration	-
1622	17.6265	27482		?	0	520	Calibration	-
1623	17.6373	27732.8		?	0	520	Calibration	-
1624	17.6482	27630.6		?	0	520	Calibration	-
1625	17.6591	27734.2		?	0	520	Calibration	-
1626	17.6699	27552.2		?	0	520	Calibration	-
1627	17.6808	27429.6		?	0	520	Calibration	-
1628	17.6917	27502.2		?	0	520	Calibration	-
1629	17.7025	27468.5		?	0	520	Calibration	-
1630	17.7134	27642.5		?	0	520	Calibration	-
1631	17.7242	27582		?	0	520	Calibration	-
1632	17.7351	27740.7		?	0	520	Calibration	-
1633	17.746	27581.1		?	0	520	Calibration	-
1634	17.7568	27744.6		?	0	520	Calibration	-
1635	17.7677	27805		?	0	520	Calibration	-
1636	17.7785	27798.2		?	0	520	Calibration	-
1637	17.7894	27833		?	0	520	Calibration	-
1638	17.8003	27532.2		?	0	520	Calibration	-
1639	17.8111	27566.4		?	0	520	Calibration	-
1640	17.822	27634.2		?	0	520	Calibration	-
1641	17.8328	27752		?	0	520	Calibration	-
1642	17.8437	27543.8		?	0	520	Calibration	-
1643	17.8546	27401.2		?	0	520	Calibration	-
1644	17.8654	27475.1		?	0	520	Calibration	-
1645	17.8763	27725.9		?	0	520	Calibration	-
1646	17.8871	27662.3		?	0	520	Calibration	-
1647	17.898	27666.1		?	0	520	Calibration	-
1648	17.9089	27542.4		?	0	520	Calibration	-
1649	17.9197	27687.9		?	0	520	Calibration	-
1650	17.9306	27738		?	0	520	Calibration	-
1651	17.9414	27544.7		?	0	520	Calibration	-
1652	17.9523	27727.7		?	0	520	Calibration	-
1653	17.9632	27572.6		?	0	520	Calibration	-
1654	17.974	27586.1		?	0	520	Calibration	-
1655	17.9849	27594.1		?	0	520	Calibration	-
1656	17.9957	27447.4		?	0	520	Calibration	-
1657	18.0066	27799.6		?	0	520	Calibration	-
1658	18.0175	27720.5		?	0	520	Calibration	-
1659	18.0283	27584.4		?	0	520	Calibration	-
1660	18.0392	27565.8		?	0	520	Calibration	-
1661	18.05	27384.8		?	0	520	Calibration	-
1662	18.0609	27669.6		?	0	520	Calibration	-
1663	18.0718	27398.6		?	0	520	Calibration	-
1664	18.0826	27614.4		?	0	520	Calibration	-
1665	18.0935	27758		?	0	520	Calibration	-
1666	18.1043	27653.2		?	0	520	Calibration	-
1667	18.1152	27704.6		?	0	520	Calibration	-
1668	18.1261	27522.4		?	0	520	Calibration	-
1669	18.1369	27586.6		?	0	520	Calibration	-
1670	18.1478	27486.4		?	0	520	Calibration	-
1671	18.1586	27483		?	0	520	Calibration	-
1672	18.1695	27837.3		?	0	520	Calibration	-
1673	18.1804	27609.3		?	0	520	Calibration	-
1674	18.1912	27305.1		?	0	520	Calibration	-
1675	18.2021	27590.8		?	0	520	Calibration	-
1676	18.213	27780.4		?	0	520	Calibration	-
1677	18.2238	27778.6		?	0	520	Calibration	-
1678	18.2347	27681.7		?	0	520	Calibration	-
1679	18.2455	27465.1		?	0	520	Calibration	-
1680	18.2564	27660.2		?	0	520	Calibration	-
1681	18.2673	27341.6		?	0	520	Calibration	-
1682	18.2781	27626.2		?	0	520	Calibration	-
1683	18.289	27583.9		?	0	520	Calibration	-
1684	18.2998	27532.8		?	0	520	Calibration	-
1685	18.3107	27635.8		?	0	520	Calibration	-
1686	18.3216	27524.7		?	0	520	Calibration	-
1687	18.3324	27379.1		?	0	520	Calibration	-
1688	18.3433	27489		?	0	520	Calibration	-
1689	18.3541	27361.9		?	0	520	Calibration	-
1690	18.365	27573.2		?	0	520	Calibration	-
1691	18.3759	27645.7		?	0	520	Calibration	-
1692	18.3867	27596.5		?	0	520	Calibration	-
1693	18.3976	27351.8		?	0	520	Calibration	-
1694	18.4084	27616.8		?	0	520	Calibration	-
1695	18.4193	27412.4		?	0	520	Calibration	-
1696	18.4302	27512.4		?	0	520	Calibration	-
1697	18.441	27585.3		?	0	520	Calibration	-
1698	18.4519	27634.7		?	0	520	Calibration	-
1699	18.4627	27475.9		?	0	520	Calibration	-
1700	18.4736	27470.8		?	0	520	Calibration	-
1701	18.4845	27633.2		?	0	520	Calibration	-
1702	18.4953	27486.8		?	0	520	Calibration	-
1703	18.5062	27537.5		?	0	520	Calibration	-
1704	18.517	27502.1		?	0	520	Calibration	-
1705	18.5279	27395.3		?	0	520	Calibration	-
1706	18.5388	27628.3		?	0	520	Calibration	-
1707	18.5496	27421.1		?	0	520	Calibration	-
1708	18.5605	27426.2		?	0	520	Calibration	-
1709	18.5713	27519.1		?	0	520	Calibration	-
1710	18.5822	27482.9		?	0	520	Calibration	-
1711	18.5931	27454.7		?	0	520	Calibration	-
1712	18.6039	27713		?	0	520	Calibration	-
1713	18.6148	27303		?	0	520	Calibration	-
1714	18.6256	27535		?	0	520	Calibration	-
1715	18.6365	27374.2		?	0	520	Calibration	-
1716	18.6474	27369		?	0	520	Calibration	-
1717	18.6582	27351.9		?	0	520	Calibration	-
1718	18.6691	27589.6		?	0	520	Calibration	-
1719	18.68	27480.8		?	0	520	Calibration	-
1720	18.6908	27627.2		?	0	520	Calibration	-
1721	18.7017	27490.9		?	0	520	Calibration	-
1722	18.7125	27637.1		?	0	520	Calibration	-
1723	18.7234	27801.9		?	0	520	Calibration	-
1724	18.7343	27714.8		?	0	520	Calibration	-
1725	18.7451	27710.9		?	0	520	Calibration	-
1726	18.756	27546.8		?	0	520	Calibration	-
1727	18.7668	27635.4		?	0	520	Calibration	-
1728	18.7777	27626.7		?	0	520	Calibration	-
1729	18.7886	27764.6		?	0	520	Calibration	-
1730	18.7994	27647		?	0	520	Calibration	-
1731	18.8103	27772.3		?	0	520	Calibration	-
1732	18.8211	27614.6		?	0	520	Calibration	-
1733	18.832	27453.9		?	0	520	Calibration	-
1734	18.8429	27474.9		?	0	520	Calibration	-
1735	18.8537	27536.1		?	0	520	Calibration	-
1736	18.8646	27734.2		?	0	520	Calibration	-
1737	18.8754	27372.3		?	0	520	Calibration	-
1738	18.8863	27611.9		?	0	520	Calibration	-
1739	18.8972	27633.5		?	0	520	Calibration	-
1740	18.908	27578.1		?	0	520	Calibration	-
1741	18.9189	27529.5		?	0	520	Calibration	-
1742	18.9297	27633.1		?	0	520	Calibration	-
1743	18.9406	27441.8		?	0	520	Calibration	-
1744	18.9515	27632.9		?	0	520	Calibration	-
1745	18.9623	27657		?	0	520	Calibration	-
1746	18.9732	27462.9		?	0	520	Calibration	-
1747	18.984	27732.9		?	0	520	Calibration	-
1748	18.9949	27466.2		?	0	520	Calibration	-
1749	19.0058	27710.8		?	0	520	Calibration	-
1750	19.0166	27526.8		?	0	520	Calibration	-
1751	19.0275	27542.3		?	0	520	Calibration	-
1752	19.0383	27265.3		?	0	520	Calibration	-
1753	19.0492	27589.4		?	0	520	Calibration	-
1754	19.0601	27633.6		?	0	520	Calibration	-
1755	19.0709	27583.6		?	0	520	Calibration	-
1756	19.0818	27555.2		?	0	520	Calibration	-
1757	19.0926	27539.5		?	0	520	Calibration	-
1758	19.1035	27497.3		?	0	520	Calibration	-
1759	19.1144	27582.2		?	0	520	Calibration	-
1760	19.1252	27496.1		?	0	520	Calibration	-
1761	19.1361	27767.1		?	0	520	Calibration	-
1762	19.1469	27503.7		?	0	520	Calibration	-
1763	19.1578	27484.5		?	0	520	Calibration	-
1764	19.1687	27679.3		?	0	520	Calibration	-
1765	19.1795	27439.1		?	0	520	Calibration	-
1766	19.1904	27541.3		?	0	520	Calibration	-
1767	19.2013	27562		?	0	520	Calibration	-
1768	19.2121	27604.9		?	0	520	Calibration	-
1769	19.223	27595.2		?	0	520	Calibration	-
1770	19.2338	27526.5		?	0	520	Calibration	-
1771	19.2447	27497.6		?	0	520	Calibration	-
1772	19.2556	27431.8		?	0	520	Calibration	-
1773	19.2664	27524.4		?	0	520	Calibration	-
1774	19.2773	27570.6		?	0	520	Calibration	-
1775	19.2881	27510.2		?	0	520	Calibration	-
1776	19.299	27560.4		?	0	520	Calibration	-
1777	19.3099	27647.1		?	0	520	Calibration	-
1778	19.3207	27486.4		?	0	520	Calibration	-
1779	19.3316	27632.2		?	0	520	Calibration	-
1780	19.3424	27761.1		?	0	520	Calibration	-
1781	19.3533	27598.2		?	0	520	Calibration	-
1782	19.3642	27655.8		?	0	520	Calibration	-
1783	19.375	27740.9		?	0	520	Calibration	-
1784	19.3859	27538.6		?	0	520	Calibration	-
1785	19.3967	27446.9		?	0	520	Calibration	-
1786	19.4076	27397.1		?	0	520	Calibration	-
1787	19.4185	27593.6		?	0	520	Calibration	-
1788	19.4293	27380.1		?	0	520	Calibration	-
1789	19.4402	27478.2		?	0	520	Calibration	-
1790	19.451	27219.5		?	0	520	Calibration	-
1791	19.4619	27278.6		?	0	520	Calibration	-
1792	19.4728	27529.6		?	0	520	Calibration	-
1793	19.4836	27601.1		?	0	520	Calibration	-
1794	19.4945	27505.3		?	0	520	Calibration	-
1795	19.5053	27507.7		?	0	520	Calibration	-
1796	19.5162	27448		?	0	520	Calibration	-
1797	19.5271	27588.9		?	0	520	Calibration	-
1798	19.5379	27572.6		?	0	520	Calibration	-
1799	19.5488	27491.6		?	0	520	Calibration	-
1800	19.5596	27425.9		?	0	520	Calibration	-
1801	19.5705	27477.8		?	0	520	Calibration	-
1802	19.5814	27405.8		?	0	520	Calibration	-
1803	19.5922	27521.1		?	0	520	Calibration	-
1804	19.6031	27565.4		?	0	520	Calibration	-
1805	19.6139	27239		?	0	520	Calibration	-
1806	19.6248	27492.2		?	0	520	Calibration	-
1807	19.6357	27463.9		?	0	520	Calibration	-
1808	19.6465	27404.9		?	0	520	Calibration	-
1809	19.6574	27432		?	0	520	Calibration	-
1810	19.6682	27365		?	0	520	Calibration	-
1811	19.6791	27581.2		?	0	520	Calibration	-
1812	19.69	27444.3		?	0	520	Calibration	-
1813	19.7008	27386.8		?	0	520	Calibration	-
1814	19.7117	27557.5		?	0	520	Calibration	-
1815	19.7226	27404.5		?	0	520	Calibration	-
1816	19.7334	27628.9		?	0	520	Calibration	-
1817	19.7443	27564.6		?	0	520	Calibration	-
1818	19.7551	27613.8		?	0	520	Calibration	-
1819	19.766	27404.8		?	0	520	Calibration	-
1820	19.7769	27637.8		?	0	520	Calibration	-
1821	19.7877	27636.6		?	0	520	Calibration	-
1822	19.7986	27510.4		?	0	520	Calibration	-
1823	19.8094	27614.8		?	0	520	Calibration	-
1824	19.8203	27803.1		?	0	520	Calibration	-
1825	19.8312	27613.3		?	0	520	Calibration	-
1826	19.842	27507.3		?	0	520	Calibration	-
1827	19.8529	27519.4		?	0	520	Calibration	-
1828	19.8637	27543.9		?	0	520	Calibration	-
1829	19.8746	27475.6		?	0	520	Bleach correction function: exp, offset = 3830,2513866143745 * exp(-0,001632038428411578 * x) + 27409,97972674001	-
1830	19.8855	27640.9		?	0	520	Calculating F0: 31615,058611503173	Step 1: 0,0 %
1831	19.8963	27498.1	31121.5	-13.02	-1.56	520	Hold, Current dF/F0 in tolerance range,	Step 1: 0,0 %
1832	19.9072	27717.4	31370.1	-12.33	-0.77	520	Current dF/F0 smaller than holding dF/F0 (0,0 %), --> Change wavelength by 0,0 nm	Step 1: 0,0 %
1833	19.918	27578.8	31213.6	-12.77	-1.27	520	Hold, Current dF/F0 in tolerance range,	Step 1: 0,0 %
1834	19.9289	27597.4	31235	-12.71	-1.2	520	Current dF/F0 smaller than holding dF/F0 (0,0 %), --> Change wavelength by 1,0 nm	Step 1: 0,0 %
1835	19.9398	27255.8	30848.8	-13.79	-2.42	521	Current dF/F0 smaller than holding dF/F0 (0,0 %), --> Change wavelength by 2,0 nm	Step 1: 0,0 %
1836	19.9506	27307.4	30907.5	-13.63	-2.24	523	Current dF/F0 smaller than holding dF/F0 (0,0 %), --> Change wavelength by 2,0 nm	Step 1: 0,0 %
1837	19.9615	27350.3	30956.4	-13.49	-2.08	525	Current dF/F0 smaller than holding dF/F0 (0,0 %), --> Change wavelength by 2,0 nm	Step 1: 0,0 %
1838	19.9723	27497.2	31123	-13.03	-1.56	527	Current dF/F0 smaller than holding dF/F0 (0,0 %), --> Change wavelength by 1,0 nm	Step 1: 0,0 %
1839	19.9832	27736.4	31394.1	-12.27	-0.7	528	Current dF/F0 smaller than holding dF/F0 (0,0 %), --> Change wavelength by 0,0 nm	Step 1: 0,0 %
1840	19.9941	27743	31402	-12.25	-0.67	528	Hold, Current dF/F0 in tolerance range,	Step 1: 0,0 %
1841	20.0049	27705.9	31360.4	-12.36	-0.81	528	Hold, Current dF/F0 in tolerance range,	Step 1: 0,0 %
1842	20.0158	27747.7	31408	-12.23	-0.66	528	Hold, Current dF/F0 in tolerance range,	Step 1: 0,0 %
1843	20.0266	27878.2	31556	-11.82	-0.19	528	Hold, Current dF/F0 in tolerance range,	Step 1: 0,0 %
1844	20.0375	27618.2	31262.2	-12.64	-1.12	528	Hold, Current dF/F0 in tolerance range,	Step 1: 0,0 %
1845	20.0484	27616.7	31260.7	-12.65	-1.12	528	Current dF/F0 smaller than holding dF/F0 (0,0 %), --> Change wavelength by 1,0 nm	Step 1: 0,0 %
1846	20.0592	27756.5	31419.3	-12.2	-0.62	529	Current dF/F0 smaller than holding dF/F0 (0,0 %), --> Change wavelength by 0,0 nm	Step 1: 0,0 %
1847	20.0701	27818.8	31490.2	-12.01	-0.39	529	Hold, Current dF/F0 in tolerance range,	Step 1: 0,0 %
1848	20.0809	27753.8	31417	-12.21	-0.63	529	Hold, Current dF/F0 in tolerance range,	Step 1: 0,0 %
1849	20.0918	27738.5	31400	-12.26	-0.68	529	Hold, Current dF/F0 in tolerance range,	Step 1: 0,0 %
1850	20.1027	27564	31202.8	-12.81	-1.3	529	Hold, Current dF/F0 in tolerance range,	Step 1: 0,0 %
1851	20.1135	27901.6	31585.3	-11.75	-0.09	529	Current dF/F0 smaller than holding dF/F0 (0,0 %), --> Change wavelength by 0,0 nm	Step 1: 0,0 %
1852	20.1244	28110.2	31821.8	-11.09	0.65	529	Hold, Current dF/F0 in tolerance range,	Step 1: 0,0 %
1853	20.1352	27860.8	31539.9	-11.87	-0.24	529	Hold, Current dF/F0 in tolerance range,	Step 1: 0,0 %
1854	20.1461	27508.5	31141.4	-12.99	-1.5	529	Hold, Current dF/F0 in tolerance range,	Step 1: 0,0 %
1855	20.157	27732.6	31395.4	-12.28	-0.69	529	Current dF/F0 smaller than holding dF/F0 (0,0 %), --> Change wavelength by 0,0 nm	Step 1: 0,0 %
1856	20.1678	27792.4	31463.5	-12.09	-0.48	529	Hold, Current dF/F0 in tolerance range,	Step 1: 0,0 %
1857	20.1787	27511.1	31145.3	-12.98	-1.49	529	Hold, Current dF/F0 in tolerance range,	Step 1: 0,0 %
1858	20.1896	27927.2	31616.8	-11.66	0.01	529	Current dF/F0 smaller than holding dF/F0 (0,0 %), --> Change wavelength by 0,0 nm	Step 1: 0,0 %
1859	20.2004	27845	31524	-11.92	-0.29	529	Hold, Current dF/F0 in tolerance range,	Step 1: 0,0 %
1860	20.2113	27485.6	31117.5	-13.06	-1.57	529	Hold, Current dF/F0 in tolerance range,	Step 1: 0,0 %
1861	20.2221	27478.6	31109.9	-13.08	-1.6	529	Current dF/F0 smaller than holding dF/F0 (0,0 %), --> Change wavelength by 1,0 nm	Step 1: 0,0 %
1862	20.233	27803.6	31478.2	-12.06	-0.43	530	Current dF/F0 smaller than holding dF/F0 (0,0 %), --> Change wavelength by 0,0 nm	Step 1: 0,0 %
1863	20.2439	27672.1	31329.6	-12.47	-0.9	530	Hold, Current dF/F0 in tolerance range,	Step 1: 0,0 %
1864	20.2547	27779.8	31452	-12.13	-0.52	530	Hold, Current dF/F0 in tolerance range,	Step 1: 0,0 %
1865	20.2656	27991.4	31691.9	-11.46	0.24	530	Hold, Current dF/F0 in tolerance range,	Step 1: 0,0 %
1866	20.2764	27898.3	31586.8	-11.76	-0.09	530	Hold, Current dF/F0 in tolerance range,	Step 1: 0,0 %
1867	20.2873	27809.6	31486.7	-12.04	-0.41	530	Hold, Current dF/F0 in tolerance range,	Step 1: 0,0 %
1868	20.2982	27882.1	31569.1	-11.81	-0.15	530	Hold, Current dF/F0 in tolerance range,	Step 1: 0,0 %
1869	20.309	27844.4	31526.8	-11.93	-0.28	530	Hold, Current dF/F0 in tolerance range,	Step 1: 0,0 %
1870	20.3199	27737.6	31406.1	-12.26	-0.66	530	Hold, Current dF/F0 in tolerance range,	Step 1: 0,0 %
1871	20.3307	27710.7	31376	-12.35	-0.76	530	Hold, Current dF/F0 in tolerance range,	Step 1: 0,0 %
1872	20.3416	27891.8	31581.5	-11.78	-0.11	530	Hold, Current dF/F0 in tolerance range,	Step 1: 0,0 %
1873	20.3525	27770.9	31444.9	-12.16	-0.54	530	Hold, Current dF/F0 in tolerance range,	Step 1: 0,0 %
1874	20.3633	27927.5	31622.5	-11.66	0.02	530	Hold, Current dF/F0 in tolerance range,	Step 1: 0,0 %
1875	20.3742	27757.9	31430.8	-12.2	-0.58	530	Hold, Current dF/F0 in tolerance range,	Step 1: 0,0 %
1876	20.385	27801	31480	-12.06	-0.43	530	Hold, Current dF/F0 in tolerance range,	Step 1: 0,0 %
1877	20.3959	27763.9	31438.3	-12.18	-0.56	530	Hold, Current dF/F0 in tolerance range,	Step 1: 0,0 %
1878	20.4068	27860.4	31548	-11.88	-0.21	530	Hold, Current dF/F0 in tolerance range,	Step 1: 0,0 %
1879	20.4176	27736.6	31408	-12.27	-0.65	530	Hold, Current dF/F0 in tolerance range,	Step 1: 0,0 %
1880	20.4285	27721.5	31391.3	-12.32	-0.71	530	Hold, Current dF/F0 in tolerance range,	Step 1: 0,0 %
1881	20.4393	27881.9	31573.3	-11.81	-0.13	530	Hold, Current dF/F0 in tolerance range,	Step 1: 0,0 %
1882	20.4502	27741.2	31414.3	-12.25	-0.63	530	Hold, Current dF/F0 in tolerance range,	Step 1: 0,0 %
1883	20.4611	27957.6	31659.7	-11.57	0.14	530	Hold, Current dF/F0 in tolerance range,	Step 1: 0,0 %
1884	20.4719	28069.8	31787	-11.21	0.54	530	Hold, Current dF/F0 in tolerance range,	Step 1: 0,0 %
1885	20.4828	27635.9	31296	-12.59	-1.01	530	Hold, Current dF/F0 in tolerance range,	Step 1: 0,0 %
1886	20.4936	27687.9	31355.3	-12.42	-0.82	530	Current dF/F0 smaller than holding dF/F0 (0,0 %), --> Change wavelength by 0,0 nm	Step 1: 0,0 %
1887	20.5045	27909.1	31606	-11.72	-0.03	530	Hold, Current dF/F0 in tolerance range,	Step 1: 0,0 %
1888	20.5154	27881.7	31575.3	-11.81	-0.13	530	Hold, Current dF/F0 in tolerance range,	Step 1: 0,0 %
1889	20.5262	27800.4	31483.6	-12.07	-0.42	530	Hold, Current dF/F0 in tolerance range,	Step 1: 0,0 %
1890	20.5371	27756.6	31434.3	-12.2	-0.57	530	Hold, Current dF/F0 in tolerance range,	Step 1: 0,0 %
1891	20.5479	27739.7	31415.5	-12.26	-0.63	530	Hold, Current dF/F0 in tolerance range,	Step 1: 0,0 %
1892	20.5588	27619.6	31279.8	-12.64	-1.06	530	Hold, Current dF/F0 in tolerance range,	Step 1: 0,0 %
1893	20.5697	27848.4	31539.2	-11.91	-0.24	530	Current dF/F0 smaller than holding dF/F0 (0,0 %), --> Change wavelength by 0,0 nm	Step 1: 0,0 %
1894	20.5805	27713.6	31386.9	-12.34	-0.72	530	Hold, Current dF/F0 in tolerance range,	Step 1: 0,0 %
1895	20.5914	27863.5	31557	-11.87	-0.18	530	Hold, Current dF/F0 in tolerance range,	Step 1: 0,0 %
1896	20.6022	27524	31172.8	-12.94	-1.4	530	Hold, Current dF/F0 in tolerance range,	Step 1: 0,0 %
1897	20.6131	27823.3	31512.2	-11.99	-0.33	530	Current dF/F0 smaller than holding dF/F0 (0,0 %), --> Change wavelength by 0,0 nm	Step 1: 0,0 %
1898	20.624	27508.7	31156.1	-12.99	-1.45	530	Hold, Current dF/F0 in tolerance range,	Step 1: 0,0 %
1899	20.6348	27766.1	31448	-12.17	-0.53	530	Current dF/F0 smaller than holding dF/F0 (0,0 %), --> Change wavelength by 0,0 nm	Step 1: 0,0 %
1900	20.6457	27809.4	31497.3	-12.04	-0.37	530	Hold, Current dF/F0 in tolerance range,	Step 1: 0,0 %
1901	20.6565	27674	31344.3	-12.47	-0.86	530	Hold, Current dF/F0 in tolerance range,	Step 1: 0,0 %
1902	20.6674	27913.4	31615.8	-11.71	0	530	Hold, Current dF/F0 in tolerance range,	Step 1: 0,0 %
1903	20.6783	27765	31448	-12.18	-0.53	530	Hold, Current dF/F0 in tolerance range,	Step 1: 0,0 %
1904	20.6891	27909.6	31612.1	-11.72	-0.01	530	Hold, Current dF/F0 in tolerance range,	Step 1: 0,0 %
1905	20.7	27729.6	31408.6	-12.29	-0.65	530	Hold, Current dF/F0 in tolerance range,	Step 1: 0,0 %
1906	20.7109	28006.9	31723	-11.41	0.34	530	Hold, Current dF/F0 in tolerance range,	Step 1: 0,0 %
1907	20.7217	27837.1	31531	-11.95	-0.27	530	Hold, Current dF/F0 in tolerance range,	Step 1: 0,0 %
1908	20.7326	27894.1	31595.9	-11.77	-0.06	530	Hold, Current dF/F0 in tolerance range,	Step 1: 0,0 %
1909	20.7434	27646.5	31315.7	-12.55	-0.95	530	Hold, Current dF/F0 in tolerance range,	Step 1: 0,0 %
1910	20.7543	27604.7	31268.7	-12.69	-1.1	530	Hold, Current dF/F0 in tolerance range,	Step 1: 0,0 %
1911	20.7652	27832.9	31527.5	-11.96	-0.28	530	Current dF/F0 smaller than holding dF/F0 (0,0 %), --> Change wavelength by 0,0 nm	Step 1: 0,0 %
1912	20.776	27953.3	31664.2	-11.58	0.16	530	Hold, Current dF/F0 in tolerance range,	Step 1: 0,0 %
1913	20.7869	27786.8	31475.8	-12.11	-0.44	530	Hold, Current dF/F0 in tolerance range,	Step 1: 0,0 %
1914	20.7977	27847.6	31545.1	-11.92	-0.22	530	Hold, Current dF/F0 in tolerance range,	Step 1: 0,0 %
1915	20.8086	27976.2	31691.1	-11.51	0.24	530	Hold, Current dF/F0 in tolerance range,	Step 1: 0,0 %
1916	20.8195	27757.4	31443.5	-12.2	-0.54	530	Hold, Current dF/F0 in tolerance range,	Step 1: 0,0 %
1917	20.8303	27675.4	31351	-12.46	-0.84	530	Hold, Current dF/F0 in tolerance range,	Step 1: 0,0 %
1918	20.8412	27774.8	31463.8	-12.15	-0.48	530	Hold, Current dF/F0 in tolerance range,	Step 1: 0,0 %
1919	20.852	27871.1	31573.2	-11.84	-0.13	530	Hold, Current dF/F0 in tolerance range,	Step 1: 0,0 %
1920	20.8629	27849.4	31549	-11.91	-0.21	530	Hold, Current dF/F0 in tolerance range,	Step 1: 0,0 %
1921	20.8738	27715	31397	-12.34	-0.69	530	Hold, Current dF/F0 in tolerance range,	Step 1: 0,0 %
1922	20.8846	27755	31442.7	-12.21	-0.55	530	Hold, Current dF/F0 in tolerance range,	Step 1: 0,0 %
1923	20.8955	27798.6	31492.4	-12.07	-0.39	530	Hold, Current dF/F0 in tolerance range,	Step 1: 0,0 %
1924	20.9063	27854.7	31556.2	-11.89	-0.19	530	Hold, Current dF/F0 in tolerance range,	Step 1: 0,0 %
1925	20.9172	27677.2	31355.5	-12.46	-0.82	530	Hold, Current dF/F0 in tolerance range,	Step 1: 0,0 %
1926	20.9281	27735.1	31421.4	-12.27	-0.61	530	Hold, Current dF/F0 in tolerance range,	Step 1: 0,0 %
1927	20.9389	27733.4	31419.7	-12.28	-0.62	530	Hold, Current dF/F0 in tolerance range,	Step 1: 0,0 %
1928	20.9498	27858.4	31561.6	-11.88	-0.17	530	Hold, Current dF/F0 in tolerance range,	Step 1: 0,0 %
1929	20.9606	27652.4	31328.6	-12.53	-0.91	530	Hold, Current dF/F0 in tolerance range,	Step 1: 0,0 %
1930	20.9715	27833.2	31533.8	-11.96	-0.26	530	Hold, Current dF/F0 in tolerance range,	Step 1: 0,0 %
1931	20.9824	27716.4	31401.8	-12.33	-0.67	530	Hold, Current dF/F0 in tolerance range,	Step 1: 0,0 %
1932	20.9932	27819.6	31519	-12.01	-0.3	530	Hold, Current dF/F0 in tolerance range,	Step 1: 0,0 %
1933	21.0041	27702.1	31386.1	-12.38	-0.72	530	Hold, Current dF/F0 in tolerance range,	Step 1: 0,0 %
1934	21.0149	27558.9	31224.1	-12.83	-1.24	530	Hold, Current dF/F0 in tolerance range,	Step 1: 0,0 %
1935	21.0258	27814.6	31514.1	-12.02	-0.32	530	Current dF/F0 smaller than holding dF/F0 (0,0 %), --> Change wavelength by 0,0 nm	Step 1: 0,0 %
1936	21.0367	27607.5	31279.8	-12.68	-1.06	530	Hold, Current dF/F0 in tolerance range,	Step 1: 0,0 %
1937	21.0475	27680.8	31363.2	-12.44	-0.8	530	Current dF/F0 smaller than holding dF/F0 (0,0 %), --> Change wavelength by 0,0 nm	Step 1: 0,0 %
1938	21.0584	27301.1	30933.3	-13.65	-2.16	530	Hold, Current dF/F0 in tolerance range,	Step 1: 0,0 %
1939	21.0692	27718.4	31406.4	-12.33	-0.66	530	Current dF/F0 smaller than holding dF/F0 (0,0 %), --> Change wavelength by 0,0 nm	Step 1: 0,0 %
1940	21.0801	27756.9	31450.4	-12.2	-0.52	530	Hold, Current dF/F0 in tolerance range,	Step 1: 0,0 %
1941	21.091	27724.8	31414.2	-12.31	-0.64	530	Hold, Current dF/F0 in tolerance range,	Step 1: 0,0 %
1942	21.1018	27701.1	31387.7	-12.38	-0.72	530	Hold, Current dF/F0 in tolerance range,	Step 1: 0,0 %
1943	21.1127	27924.9	31641.6	-11.67	0.08	530	Hold, Current dF/F0 in tolerance range,	Step 1: 0,0 %
1944	21.1235	27875.2	31585.6	-11.83	-0.09	530	Hold, Current dF/F0 in tolerance range,	Step 1: 0,0 %
1945	21.1344	27840.6	31546.7	-11.94	-0.22	530	Hold, Current dF/F0 in tolerance range,	Step 1: 0,0 %
1946	21.1453	27583.3	31255.4	-12.75	-1.14	530	Hold, Current dF/F0 in tolerance range,	Step 1: 0,0 %
1947	21.1561	27712	31401.5	-12.35	-0.68	530	Current dF/F0 smaller than holding dF/F0 (0,0 %), --> Change wavelength by 0,0 nm	Step 1: 0,0 %
1948	21.167	27701	31389.4	-12.38	-0.71	530	Hold, Current dF/F0 in tolerance range,	Step 1: 0,0 %
1949	21.1779	27763.6	31460.6	-12.18	-0.49	530	Hold, Current dF/F0 in tolerance range,	Step 1: 0,0 %
1950	21.1887	27745.7	31440.6	-12.24	-0.55	530	Hold, Current dF/F0 in tolerance range,	Step 1: 0,0 %
1951	21.1996	27500.2	31162.8	-13.02	-1.43	530	Hold, Current dF/F0 in tolerance range,	Step 1: 0,0 %
1952	21.2104	27775.8	31475.2	-12.14	-0.44	530	Current dF/F0 smaller than holding dF/F0 (0,0 %), --> Change wavelength by 0,0 nm	Step 1: 0,0 %
1953	21.2213	27618.7	31297.6	-12.64	-1	530	Hold, Current dF/F0 in tolerance range,	Step 1: 0,0 %
1954	21.2322	27882.9	31597.2	-11.81	-0.06	530	Current dF/F0 smaller than holding dF/F0 (0,0 %), --> Change wavelength by 0,0 nm	Step 1: 0,0 %
1955	21.243	27737.8	31433.1	-12.26	-0.58	530	Hold, Current dF/F0 in tolerance range,	Step 1: 0,0 %
1956	21.2539	27594.4	31271	-12.72	-1.09	530	Hold, Current dF/F0 in tolerance range,	Step 1: 0,0 %
1957	21.2647	27707.9	31399.8	-12.36	-0.68	530	Current dF/F0 smaller than holding dF/F0 (0,0 %), --> Change wavelength by 0,0 nm	Step 1: 0,0 %
1958	21.2756	27376.4	31024.4	-13.41	-1.87	530	Hold, Current dF/F0 in tolerance range,	Step 1: 0,0 %
1959	21.2865	27598.3	31276.2	-12.71	-1.07	530	Current dF/F0 smaller than holding dF/F0 (0,0 %), --> Change wavelength by 1,0 nm	Step 1: 0,0 %
1960	21.2973	27641.9	31325.9	-12.57	-0.91	531	Current dF/F0 smaller than holding dF/F0 (0,0 %), --> Change wavelength by 0,0 nm	Step 1: 0,0 %
1961	21.3082	27614.2	31294.9	-12.65	-1.01	531	Hold, Current dF/F0 in tolerance range,	Step 1: 0,0 %
1962	21.319	27937.8	31661.8	-11.63	0.15	531	Current dF/F0 smaller than holding dF/F0 (0,0 %), --> Change wavelength by 0,0 nm	Step 1: 0,0 %
1963	21.3299	27462.9	31124	-13.13	-1.55	531	Hold, Current dF/F0 in tolerance range,	Step 1: 0,0 %
1964	21.3408	27727	31423.5	-12.3	-0.61	531	Current dF/F0 smaller than holding dF/F0 (0,0 %), --> Change wavelength by 0,0 nm	Step 1: 0,0 %
1965	21.3516	27541.8	31213.9	-12.88	-1.27	531	Hold, Current dF/F0 in tolerance range,	Step 1: 0,0 %
1966	21.3625	27688.1	31380	-12.42	-0.74	531	Current dF/F0 smaller than holding dF/F0 (0,0 %), --> Change wavelength by 0,0 nm	Step 1: 0,0 %
1967	21.3733	27699.8	31393.6	-12.38	-0.7	531	Hold, Current dF/F0 in tolerance range,	Step 1: 0,0 %
1968	21.3842	27651.4	31339	-12.54	-0.87	531	Hold, Current dF/F0 in tolerance range,	Step 1: 0,0 %
1969	21.3951	27734.1	31433	-12.28	-0.58	531	Hold, Current dF/F0 in tolerance range,	Step 1: 0,0 %
1970	21.4059	27622.5	31306.8	-12.63	-0.98	531	Hold, Current dF/F0 in tolerance range,	Step 1: 0,0 %
1971	21.4168	27791.4	31498.6	-12.09	-0.37	531	Hold, Current dF/F0 in tolerance range,	Step 1: 0,0 %
1972	21.4276	27349.8	30998.2	-13.49	-1.95	531	Hold, Current dF/F0 in tolerance range,	Step 1: 0,0 %
1973	21.4385	27557.9	31234.5	-12.83	-1.2	531	Current dF/F0 smaller than holding dF/F0 (0,0 %), --> Change wavelength by 1,0 nm	Step 1: 0,0 %
1974	21.4494	27554	31230.3	-12.85	-1.22	532	Current dF/F0 smaller than holding dF/F0 (0,0 %), --> Change wavelength by 1,0 nm	Step 1: 0,0 %
1975	21.4602	27724.8	31424.1	-12.31	-0.6	533	Current dF/F0 smaller than holding dF/F0 (0,0 %), --> Change wavelength by 0,0 nm	Step 1: 0,0 %
1976	21.4711	27509.8	31180.7	-12.99	-1.37	533	Hold, Current dF/F0 in tolerance range,	Step 1: 0,0 %
1977	21.4819	27512.4	31184	-12.98	-1.36	533	Current dF/F0 smaller than holding dF/F0 (0,0 %), --> Change wavelength by 1,0 nm	Step 1: 0,0 %
1978	21.4928	27556.6	31234.4	-12.84	-1.2	534	Current dF/F0 smaller than holding dF/F0 (0,0 %), --> Change wavelength by 1,0 nm	Step 1: 0,0 %
1979	21.5037	27783.2	31491.5	-12.12	-0.39	535	Current dF/F0 smaller than holding dF/F0 (0,0 %), --> Change wavelength by 0,0 nm	Step 1: 0,0 %
1980	21.5145	27524.3	31198.3	-12.94	-1.32	535	Hold, Current dF/F0 in tolerance range,	Step 1: 0,0 %
1981	21.5254	27596.4	31280.4	-12.71	-1.06	535	Current dF/F0 smaller than holding dF/F0 (0,0 %), --> Change wavelength by 1,0 nm	Step 1: 0,0 %
1982	21.5362	27790.4	31500.5	-12.1	-0.36	536	Current dF/F0 smaller than holding dF/F0 (0,0 %), --> Change wavelength by 0,0 nm	Step 1: 0,0 %
1983	21.5471	27685.9	31382.4	-12.43	-0.74	536	Hold, Current dF/F0 in tolerance range,	Step 1: 0,0 %
1984	21.558	27721.9	31423.4	-12.31	-0.61	536	Hold, Current dF/F0 in tolerance range,	Step 1: 0,0 %
1985	21.5688	27826.4	31542.2	-11.98	-0.23	536	Hold, Current dF/F0 in tolerance range,	Step 1: 0,0 %
1986	21.5797	27576.6	31259.3	-12.77	-1.13	536	Hold, Current dF/F0 in tolerance range,	Step 1: 0,0 %
1987	21.5905	27842.9	31561.4	-11.93	-0.17	536	Current dF/F0 smaller than holding dF/F0 (0,0 %), --> Change wavelength by 0,0 nm	Step 1: 0,0 %
1988	21.6014	27887.7	31612.5	-11.79	-0.01	536	Hold, Current dF/F0 in tolerance range,	Step 1: 0,0 %
1989	21.6123	27611.2	31299.3	-12.66	-1	536	Hold, Current dF/F0 in tolerance range,	Step 1: 0,0 %
1990	21.6231	27794.9	31507.9	-12.08	-0.34	536	Hold, Current dF/F0 in tolerance range,	Step 1: 0,0 %
1991	21.634	27523.8	31200.8	-12.94	-1.31	536	Hold, Current dF/F0 in tolerance range,	Step 1: 0,0 %
1992	21.6448	27786.2	31498.6	-12.11	-0.37	536	Current dF/F0 smaller than holding dF/F0 (0,0 %), --> Change wavelength by 0,0 nm	Step 1: 0,0 %
1993	21.6557	27840.4	31560.3	-11.94	-0.17	536	Hold, Current dF/F0 in tolerance range,	Step 1: 0,0 %
[truncated: 1,216 more rows]

## Sheet: Figure 4D
Time	dF/F0_bleach_correct	Wavelength	dF/F0_bleach_correct	Wavelength	dF/F0_bleach_correct	Wavelength	dF/F0_bleach_correct	Wavelength	dF/F0_bleach_correct	Wavelength	dF/F0_bleach_correct	Wavelength	dF/F0_bleach_correct	Wavelength	dF/F0_bleach_correct	Wavelength	dF/F0_bleach_correct	Wavelength	dF/F0_bleach_correct	Wavelength	dF/F0_bleach_correct	Wavelength	dF/F0_bleach_correct	Wavelength	dF/F0_bleach_correct	Wavelength	dF/F0_bleach_correct	Wavelength	Mean DF/F0	SEM	Mean wavelength	SEM
0.0109	0	525	0	527	0	530	0	530	0	530	0	530	0	530	0	530	0	530	0	525	0	525	0	530	0	530	0	525	0	0	528.357	0.62553
0.0217	0	525	0	527	0	530	0	530	0	530	0	530	0	530	0	530	0	530	0	525	0	525	0	530	0	530	0	525	0	0	528.357	0.62553
0.0326	0	525	0	527	0	530	0	530	0	530	0	530	0	530	0	530	0	530	0	525	0	525	0	530	0	530	0	525	0	0	528.357	0.62553
0.0434	0	525	0	527	0	530	0	530	0	530	0	530	0	530	0	530	0	530	0	525	0	525	0	530	0	530	0	525	0	0	528.357	0.62553
0.0543	0	525	0	527	0	530	0	530	0	530	0	530	0	530	0	530	0	530	0	525	0	525	0	530	0	530	0	525	0	0	528.357	0.62553
0.0652	0	525	0	527	0	530	0	530	0	530	0	530	0	530	0	530	0	530	0	525	0	525	0	530	0	530	0	525	0	0	528.357	0.62553
0.076	0	525	0	527	0	530	0	530	0	530	0	530	0	530	0	530	0	530	0	525	0	525	0	530	0	530	0	525	0	0	528.357	0.62553
0.0869	0	525	0	527	0	530	0	530	0	530	0	530	0	530	0	530	0	530	0	525	0	525	0	530	0	530	0	525	0	0	528.357	0.62553
0.0977	0	525	0	527	0	530	0	530	0	530	0	530	0	530	0	530	0	530	0	525	0	525	0	530	0	530	0	525	0	0	528.357	0.62553
0.1086	0	525	0	527	0	530	0	530	0	530	0	530	0	530	0	530	0	530	0	525	0	525	0	530	0	530	0	525	0	0	528.357	0.62553
0.1195	0	525	0	527	0	530	0	530	0	530	0	530	0	530	0	530	0	530	0	525	0	525	0	530	0	530	0	525	0	0	528.357	0.62553
0.1303	0	525	0	527	0	530	0	530	0	530	0	530	0	530	0	530	0	530	0	525	0	525	0	530	0	530	0	525	0	0	528.357	0.62553
0.1412	0	525	0	527	0	530	0	530	0	530	0	530	0	530	0	530	0	530	0	525	0	525	0	530	0	530	0	525	0	0	528.357	0.62553
0.152	0	525	0	527	0	530	0	530	0	530	0	530	0	530	0	530	0	530	0	525	0	525	0	530	0	530	0	525	0	0	528.357	0.62553
0.1629	0	525	0	527	0	530	0	530	0	530	0	530	0	530	0	530	0	530	0	525	0	525	0	530	0	530	0	525	0	0	528.357	0.62553
0.1738	0	525	0	527	0	530	0	530	0	530	0	530	0	530	0	530	0	530	0	525	0	525	0	530	0	530	0	525	0	0	528.357	0.62553
0.1846	0	525	0	527	0	530	0	530	0	530	0	530	0	530	0	530	0	530	0	525	0	525	0	530	0	530	0	525	0	0	528.357	0.62553
0.1955	0	525	0	527	0	530	0	530	0	530	0	530	0	530	0	530	0	530	0	525	0	525	0	530	0	530	0	525	0	0	528.357	0.62553
0.2063	0	525	0	527	0	530	0	530	0	530	0	530	0	530	0	530	0	530	0	525	0	525	0	530	0	530	0	525	0	0	528.357	0.62553
0.2172	0	525	0	527	0	530	0	530	0	530	0	530	0	530	0	530	0	530	0	525	0	525	0	530	0	530	0	525	0	0	528.357	0.62553
0.2281	0	525	0	527	0	530	0	530	0	530	0	530	0	530	0	530	0	530	0	525	0	525	0	530	0	530	0	525	0	0	528.357	0.62553
0.2389	0	525	0	527	0	530	0	530	0	530	0	530	0	530	0	530	0	530	0	525	0	525	0	530	0	530	0	525	0	0	528.357	0.62553
0.2498	0	525	0	527	0	530	0	530	0	530	0	530	0	530	0	530	0	530	0	525	0	525	0	530	0	530	0	525	0	0	528.357	0.62553
0.2607	0	525	0	527	0	530	0	530	0	530	0	530	0	530	0	530	0	530	0	525	0	525	0	530	0	530	0	525	0	0	528.357	0.62553
0.2715	0	525	0	527	0	530	0	530	0	530	0	530	0	530	0	530	0	530	0	525	0	525	0	530	0	530	0	525	0	0	528.357	0.62553
0.2824	0	525	0	527	0	530	0	530	0	530	0	530	0	530	0	530	0	530	0	525	0	525	0	530	0	530	0	525	0	0	528.357	0.62553
0.2932	0	525	0	527	0	530	0	530	0	530	0	530	0	530	0	530	0	530	0	525	0	525	0	530	0	530	0	525	0	0	528.357	0.62553
0.3041	0	525	0	527	0	530	0	530	0	530	0	530	0	530	0	530	0	530	0	525	0	525	0	530	0	530	0	525	0	0	528.357	0.62553
0.315	0	525	0	527	0	530	0	530	0	530	0	530	0	530	0	530	0	530	0	525	0	525	0	530	0	530	0	525	0	0	528.357	0.62553
0.3258	0	525	0	527	0	530	0	530	0	530	0	530	0	530	0	530	0	530	0	525	0	525	0	530	0	530	0	525	0	0	528.357	0.62553
0.3367	0	525	0	527	0	530	0	530	0	530	0	530	0	530	0	530	0	530	0	525	0	525	0	530	0	530	0	525	0	0	528.357	0.62553
0.3475	0	525	0	527	0	530	0	530	0	530	0	530	0	530	0	530	0	530	0	525	0	525	0	530	0	530	0	525	0	0	528.357	0.62553
0.3584	0	525	0	527	0	530	0	530	0	530	0	530	0	530	0	530	0	530	0	525	0	525	0	530	0	530	0	525	0	0	528.357	0.62553
0.3693	0	525	0	527	0	530	0	530	0	530	0	530	0	530	0	530	0	530	0	525	0	525	0	530	0	530	0	525	0	0	528.357	0.62553
0.3801	0	525	0	527	0	530	0	530	0	530	0	530	0	530	0	530	0	530	0	525	0	525	0	530	0	530	0	525	0	0	528.357	0.62553
0.391	0	525	0	527	0	530	0	530	0	530	0	530	0	530	0	530	0	530	0	525	0	525	0	530	0	530	0	525	0	0	528.357	0.62553
0.4018	0	525	0	527	0	530	0	530	0	530	0	530	0	530	0	530	0	530	0	525	0	525	0	530	0	530	0	525	0	0	528.357	0.62553
0.4127	0	525	0	527	0	530	0	530	0	530	0	530	0	530	0	530	0	530	0	525	0	525	0	530	0	530	0	525	0	0	528.357	0.62553
0.4236	0	525	0	527	0	530	0	530	0	530	0	530	0	530	0	530	0	530	0	525	0	525	0	530	0	530	0	525	0	0	528.357	0.62553
0.4344	0	525	0	527	0	530	0	530	0	530	0	530	0	530	0	530	0	530	0	525	0	525	0	530	0	530	0	525	0	0	528.357	0.62553
0.4453	0	525	0	527	0	530	0	530	0	530	0	530	0	530	0	530	0	530	0	525	0	525	0	530	0	530	0	525	0	0	528.357	0.62553
0.4561	0	525	0	527	0	530	0	530	0	530	0	530	0	530	0	530	0	530	0	525	0	525	0	530	0	530	0	525	0	0	528.357	0.62553
0.467	0	525	0	527	0	530	0	530	0	530	0	530	0	530	0	530	0	530	0	525	0	525	0	530	0	530	0	525	0	0	528.357	0.62553
0.4779	0	525	0	527	0	530	0	530	0	530	0	530	0	530	0	530	0	530	0	525	0	525	0	530	0	530	0	525	0	0	528.357	0.62553
0.4887	0	525	0	527	0	530	0	530	0	530	0	530	0	530	0	530	0	530	0	525	0	525	0	530	0	530	0	525	0	0	528.357	0.62553
0.4996	0	525	0	527	0	530	0	530	0	530	0	530	0	530	0	530	0	530	0	525	0	525	0	530	0	530	0	525	0	0	528.357	0.62553
0.5104	0	525	0	527	0	530	0	530	0	530	0	530	0	530	0	530	0	530	0	525	0	525	0	530	0	530	0	525	0	0	528.357	0.62553
0.5213	0	525	0	527	0	530	0	530	0	530	0	530	0	530	0	530	0	530	0	525	0	525	0	530	0	530	0	525	0	0	528.357	0.62553
0.5322	0	525	0	527	0	530	0	530	0	530	0	530	0	530	0	530	0	530	0	525	0	525	0	530	0	530	0	525	0	0	528.357	0.62553
0.543	0	525	0	527	0	530	0	530	0	530	0	530	0	530	0	530	0	530	0	525	0	525	0	530	0	530	0	525	0	0	528.357	0.62553
0.5539	0	525	0	527	0	530	0	530	0	530	0	530	0	530	0	530	0	530	0	525	0	525	0	530	0	530	0	525	0	0	528.357	0.62553
0.5647	0	525	0	527	0	530	0	530	0	530	0	530	0	530	0	530	0	530	0	525	0	525	0	530	0	530	0	525	0	0	528.357	0.62553
0.5756	0	525	0	527	0	530	0	530	0	530	0	530	0	530	0	530	0	530	0	525	0	525	0	530	0	530	0	525	0	0	528.357	0.62553
0.5865	0	525	0	527	0	530	0	530	0	530	0	530	0	530	0	530	0	530	0	525	0	525	0	530	0	530	0	525	0	0	528.357	0.62553
0.5973	0	525	0	527	0	530	0	530	0	530	0	530	0	530	0	530	0	530	0	525	0	525	0	530	0	530	0	525	0	0	528.357	0.62553
0.6082	0	525	0	527	0	530	0	530	0	530	0	530	0	530	0	530	0	530	0	525	0	525	0	530	0	530	0	525	0	0	528.357	0.62553
0.619	0	525	0	527	0	530	0	530	0	530	0	530	0	530	0	530	0	530	0	525	0	525	0	530	0	530	0	525	0	0	528.357	0.62553
0.6299	0	525	0	527	0	530	0	530	0	530	0	530	0	530	0	530	0	530	0	525	0	525	0	530	0	530	0	525	0	0	528.357	0.62553
0.6408	0	525	0	527	0	530	0	530	0	530	0	530	0	530	0	530	0	530	0	525	0	525	0	530	0	530	0	525	0	0	528.357	0.62553
0.6516	0	525	0	527	0	530	0	530	0	530	0	530	0	530	0	530	0	530	0	525	0	525	0	530	0	530	0	525	0	0	528.357	0.62553
0.6625	0	525	0	527	0	530	0	530	0	530	0	530	0	530	0	530	0	530	0	525	0	525	0	530	0	530	0	525	0	0	528.357	0.62553
0.6733	0	525	0	527	0	530	0	530	0	530	0	530	0	530	0	530	0	530	0	525	0	525	0	530	0	530	0	525	0	0	528.357	0.62553
0.6842	0	525	0	527	0	530	0	530	0	530	0	530	0	530	0	530	0	530	0	525	0	525	0	530	0	530	0	525	0	0	528.357	0.62553
0.6951	0	525	0	527	0	530	0	530	0	530	0	530	0	530	0	530	0	530	0	525	0	525	0	530	0	530	0	525	0	0	528.357	0.62553
0.7059	0	525	0	527	0	530	0	530	0	530	0	530	0	530	0	530	0	530	0	525	0	525	0	530	0	530	0	525	0	0	528.357	0.62553
0.7168	0	525	0	527	0	530	0	530	0	530	0	530	0	530	0	530	0	530	0	525	0	525	0	530	0	530	0	525	0	0	528.357	0.62553
0.7276	0	525	0	527	0	530	0	530	0	530	0	530	0	530	0	530	0	530	0	525	0	525	0	530	0	530	0	525	0	0	528.357	0.62553
0.7385	0	525	0	527	0	530	0	530	0	530	0	530	0	530	0	530	0	530	0	525	0	525	0	530	0	530	0	525	0	0	528.357	0.62553
0.7494	0	525	0	527	0	530	0	530	0	530	0	530	0	530	0	530	0	530	0	525	0	525	0	530	0	530	0	525	0	0	528.357	0.62553
0.7602	0	525	0	527	0	530	0	530	0	530	0	530	0	530	0	530	0	530	0	525	0	525	0	530	0	530	0	525	0	0	528.357	0.62553
0.7711	0	525	0	527	0	530	0	530	0	530	0	530	0	530	0	530	0	530	0	525	0	525	0	530	0	530	0	525	0	0	528.357	0.62553
0.782	0	525	0	527	0	530	0	530	0	530	0	530	0	530	0	530	0	530	0	525	0	525	0	530	0	530	0	525	0	0	528.357	0.62553
0.7928	0	525	0	527	0	530	0	530	0	530	0	530	0	530	0	530	0	530	0	525	0	525	0	530	0	530	0	525	0	0	528.357	0.62553
0.8037	0	525	0	527	0	530	0	530	0	530	0	530	0	530	0	530	0	530	0	525	0	525	0	530	0	530	0	525	0	0	528.357	0.62553
0.8145	0	525	0	527	0	530	0	530	0	530	0	530	0	530	0	530	0	530	0	525	0	525	0	530	0	530	0	525	0	0	528.357	0.62553
0.8254	0	525	0	527	0	530	0	530	0	530	0	530	0	530	0	530	0	530	0	525	0	525	0	530	0	530	0	525	0	0	528.357	0.62553
0.8363	0	525	0	527	0	530	0	530	0	530	0	530	0	530	0	530	0	530	0	525	0	525	0	530	0	530	0	525	0	0	528.357	0.62553
0.8471	0	525	0	527	0	530	0	530	0	530	0	530	0	530	0	530	0	530	0	525	0	525	0	530	0	530	0	525	0	0	528.357	0.62553
0.858	0	525	0	527	0	530	0	530	0	530	0	530	0	530	0	530	0	530	0	525	0	525	0	530	0	530	0	525	0	0	528.357	0.62553
0.8688	0	525	0	527	0	530	0	530	0	530	0	530	0	530	0	530	0	530	0	525	0	525	0	530	0	530	0	525	0	0	528.357	0.62553
0.8797	0	525	0	527	0	530	0	530	0	530	0	530	0	530	0	530	0	530	0	525	0	525	0	530	0	530	0	525	0	0	528.357	0.62553
0.8906	0	525	0	527	0	530	0	530	0	530	0	530	0	530	0	530	0	530	0	525	0	525	0	530	0	530	0	525	0	0	528.357	0.62553
0.9014	0	525	0	527	0	530	0	530	0	530	0	530	0	530	0	530	0	530	0	525	0	525	0	530	0	530	0	525	0	0	528.357	0.62553
0.9123	0	525	0	527	0	530	0	530	0	530	0	530	0	530	0	530	0	530	0	525	0	525	0	530	0	530	0	525	0	0	528.357	0.62553
0.9231	0	525	0	527	0	530	0	530	0	530	0	530	0	530	0	530	0	530	0	525	0	525	0	530	0	530	0	525	0	0	528.357	0.62553
0.934	0	525	0	527	0	530	0	530	0	530	0	530	0	530	0	530	0	530	0	525	0	525	0	530	0	530	0	525	0	0	528.357	0.62553
0.9449	0	525	0	527	0	530	0	530	0	530	0	530	0	530	0	530	0	530	0	525	0	525	0	530	0	530	0	525	0	0	528.357	0.62553
0.9557	0	525	0	527	0	530	0	530	0	530	0	530	0	530	0	530	0	530	0	525	0	525	0	530	0	530	0	525	0	0	528.357	0.62553
0.9666	0	525	0	527	0	530	0	530	0	530	0	530	0	530	0	530	0	530	0	525	0	525	0	530	0	530	0	525	0	0	528.357	0.62553
0.9774	0	525	0	527	0	530	0	530	0	530	0	530	0	530	0	530	0	530	0	525	0	525	0	530	0	530	0	525	0	0	528.357	0.62553
0.9883	0	525	0	527	0	530	0	530	0	530	0	530	0	530	0	530	0	530	0	525	0	525	0	530	0	530	0	525	0	0	528.357	0.62553
0.9992	0	525	0	527	0	530	0	530	0	530	0	530	0	530	0	530	0	530	0	525	0	525	0	530	0	530	0	525	0	0	528.357	0.62553
1.01	0	525	0	527	0	530	0	530	0	530	0	530	0	530	0	530	0	530	0	525	0	525	0	530	0	530	0	525	0	0	528.357	0.62553
1.0209	0	525	0	527	0	530	0	530	0	530	0	530	0	530	0	530	0	530	0	525	0	525	0	530	0	530	0	525	0	0	528.357	0.62553
1.0317	0	525	0	527	0	530	0	530	0	530	0	530	0	530	0	530	0	530	0	525	0	525	0	530	0	530	0	525	0	0	528.357	0.62553
1.0426	0	525	0	527	0	530	0	530	0	530	0	530	0	530	0	530	0	530	0	525	0	525	0	530	0	530	0	525	0	0	528.357	0.62553
1.0535	0	525	0	527	0	530	0	530	0	530	0	530	0	530	0	530	0	530	0	525	0	525	0	530	0	530	0	525	0	0	528.357	0.62553
1.0643	0	525	0	527	0	530	0	530	0	530	0	530	0	530	0	530	0	530	0	525	0	525	0	530	0	530	0	525	0	0	528.357	0.62553
1.0752	0	525	0	527	0	530	0	530	0	530	0	530	0	530	0	530	0	530	0	525	0	525	0	530	0	530	0	525	0	0	528.357	0.62553
1.086	0	525	0	527	0	530	0	530	0	530	0	530	0	530	0	530	0	530	0	525	0	525	0	530	0	530	0	525	0	0	528.357	0.62553
1.0969	0	525	0	527	0	530	0	530	0	530	0	530	0	530	0	530	0	530	0	525	0	525	0	530	0	530	0	525	0	0	528.357	0.62553
1.1078	0	525	0	527	0	530	0	530	0	530	0	530	0	530	0	530	0	530	0	525	0	525	0	530	0	530	0	525	0	0	528.357	0.62553
1.1186	0	525	0	527	0	530	0	530	0	530	0	530	0	530	0	530	0	530	0	525	0	525	0	530	0	530	0	525	0	0	528.357	0.62553
1.1295	0	525	0	527	0	530	0	530	0	530	0	530	0	530	0	530	0	530	0	525	0	525	0	530	0	530	0	525	0	0	528.357	0.62553
1.1403	0	525	0	527	0	530	0	530	0	530	0	530	0	530	0	530	0	530	0	525	0	525	0	530	0	530	0	525	0	0	528.357	0.62553
1.1512	0	525	0	527	0	530	0	530	0	530	0	530	0	530	0	530	0	530	0	525	0	525	0	530	0	530	0	525	0	0	528.357	0.62553
1.1621	0	525	0	527	0	530	0	530	0	530	0	530	0	530	0	530	0	530	0	525	0	525	0	530	0	530	0	525	0	0	528.357	0.62553
1.1729	0	525	0	527	0	530	0	530	0	530	0	530	0	530	0	530	0	530	0	525	0	525	0	530	0	530	0	525	0	0	528.357	0.62553
1.1838	0	525	0	527	0	530	0	530	0	530	0	530	0	530	0	530	0	530	0	525	0	525	0	530	0	530	0	525	0	0	528.357	0.62553
1.1946	0	525	0	527	0	530	0	530	0	530	0	530	0	530	0	530	0	530	0	525	0	525	0	530	0	530	0	525	0	0	528.357	0.62553
1.2055	0	525	0	527	0	530	0	530	0	530	0	530	0	530	0	530	0	530	0	525	0	525	0	530	0	530	0	525	0	0	528.357	0.62553
1.2164	0	525	0	527	0	530	0	530	0	530	0	530	0	530	0	530	0	530	0	525	0	525	0	530	0	530	0	525	0	0	528.357	0.62553
1.2272	0	525	0	527	0	530	0	530	0	530	0	530	0	530	0	530	0	530	0	525	0	525	0	530	0	530	0	525	0	0	528.357	0.62553
1.2381	0	525	0	527	0	530	0	530	0	530	0	530	0	530	0	530	0	530	0	525	0	525	0	530	0	530	0	525	0	0	528.357	0.62553
1.249	0	525	0	527	0	530	0	530	0	530	0	530	0	530	0	530	0	530	0	525	0	525	0	530	0	530	0	525	0	0	528.357	0.62553
1.2598	0	525	0	527	0	530	0	530	0	530	0	530	0	530	0	530	0	530	0	525	0	525	0	530	0	530	0	525	0	0	528.357	0.62553
1.2707	0	525	0	527	0	530	0	530	0	530	0	530	0	530	0	530	0	530	0	525	0	525	0	530	0	530	0	525	0	0	528.357	0.62553
1.2815	0	525	0	527	0	530	0	530	0	530	0	530	0	530	0	530	0	530	0	525	0	525	0	530	0	530	0	525	0	0	528.357	0.62553
1.2924	0	525	0	527	0	530	0	530	0	530	0	530	0	530	0	530	0	530	0	525	0	525	0	530	0	530	0	525	0	0	528.357	0.62553
1.3033	0	525	0	527	0	530	0	530	0	530	0	530	0	530	0	530	0	530	0	525	0	525	0	530	0	530	0	525	0	0	528.357	0.62553
1.3141	0	525	0	527	0	530	0	530	0	530	0	530	0	530	0	530	0	530	0	525	0	525	0	530	0	530	0	525	0	0	528.357	0.62553
1.325	0	525	0	527	0	530	0	530	0	530	0	530	0	530	0	530	0	530	0	525	0	525	0	530	0	530	0	525	0	0	528.357	0.62553
1.3358	0	525	0	527	0	530	0	530	0	530	0	530	0	530	0	530	0	530	0	525	0	525	0	530	0	530	0	525	0	0	528.357	0.62553
1.3467	0	525	0	527	0	530	0	530	0	530	0	530	0	530	0	530	0	530	0	525	0	525	0	530	0	530	0	525	0	0	528.357	0.62553
1.3576	0	525	0	527	0	530	0	530	0	530	0	530	0	530	0	530	0	530	0	525	0	525	0	530	0	530	0	525	0	0	528.357	0.62553
1.3684	0	525	0	527	0	530	0	530	0	530	0	530	0	530	0	530	0	530	0	525	0	525	0	530	0	530	0	525	0	0	528.357	0.62553
1.3793	0	525	0	527	0	530	0	530	0	530	0	530	0	530	0	530	0	530	0	525	0	525	0	530	0	530	0	525	0	0	528.357	0.62553
1.3901	0	525	0	527	0	530	0	530	0	530	0	530	0	530	0	530	0	530	0	525	0	525	0	530	0	530	0	525	0	0	528.357	0.62553
1.401	0	525	0	527	0	530	0	530	0	530	0	530	0	530	0	530	0	530	0	525	0	525	0	530	0	530	0	525	0	0	528.357	0.62553
1.4119	0	525	0	527	0	530	0	530	0	530	0	530	0	530	0	530	0	530	0	525	0	525	0	530	0	530	0	525	0	0	528.357	0.62553
1.4227	0	525	0	527	0	530	0	530	0	530	0	530	0	530	0	530	0	530	0	525	0	525	0	530	0	530	0	525	0	0	528.357	0.62553
1.4336	0	525	0	527	0	530	0	530	0	530	0	530	0	530	0	530	0	530	0	525	0	525	0	530	0	530	0	525	0	0	528.357	0.62553
1.4444	0	525	0	527	0	530	0	530	0	530	0	530	0	530	0	530	0	530	0	525	0	525	0	530	0	530	0	525	0	0	528.357	0.62553
1.4553	0	525	0	527	0	530	0	530	0	530	0	530	0	530	0	530	0	530	0	525	0	525	0	530	0	530	0	525	0	0	528.357	0.62553
1.4662	0	525	0	527	0	530	0	530	0	530	0	530	0	530	0	530	0	530	0	525	0	525	0	530	0	530	0	525	0	0	528.357	0.62553
1.477	0	525	0	527	0	530	0	530	0	530	0	530	0	530	0	530	0	530	0	525	0	525	0	530	0	530	0	525	0	0	528.357	0.62553
1.4879	0	525	0	527	0	530	0	530	0	530	0	530	0	530	0	530	0	530	0	525	0	525	0	530	0	530	0	525	0	0	528.357	0.62553
1.4987	0	525	0	527	0	530	0	530	0	530	0	530	0	530	0	530	0	530	0	525	0	525	0	530	0	530	0	525	0	0	528.357	0.62553
1.5096	0	525	0	527	0	530	0	530	0	530	0	530	0	530	0	530	0	530	0	525	0	525	0	530	0	530	0	525	0	0	528.357	0.62553
1.5205	0	525	0	527	0	530	0	530	0	530	0	530	0	530	0	530	0	530	0	525	0	525	0	530	0	530	0	525	0	0	528.357	0.62553
1.5313	0	525	0	527	0	530	0	530	0	530	0	530	0	530	0	530	0	530	0	525	0	525	0	530	0	530	0	525	0	0	528.357	0.62553
1.5422	0	525	0	527	0	530	0	530	0	530	0	530	0	530	0	530	0	530	0	525	0	525	0	530	0	530	0	525	0	0	528.357	0.62553
1.553	0	525	0	527	0	530	0	530	0	530	0	530	0	530	0	530	0	530	0	525	0	525	0	530	0	530	0	525	0	0	528.357	0.62553
1.5639	0	525	0	527	0	530	0	530	0	530	0	530	0	530	0	530	0	530	0	525	0	525	0	530	0	530	0	525	0	0	528.357	0.62553
1.5748	0	525	0	527	0	530	0	530	0	530	0	530	0	530	0	530	0	530	0	525	0	525	0	530	0	530	0	525	0	0	528.357	0.62553
1.5856	0	525	0	527	0	530	0	530	0	530	0	530	0	530	0	530	0	530	0	525	0	525	0	530	0	530	0	525	0	0	528.357	0.62553
1.5965	0	525	0	527	0	530	0	530	0	530	0	530	0	530	0	530	0	530	0	525	0	525	0	530	0	530	0	525	0	0	528.357	0.62553
1.6073	0	525	0	527	0	530	0	530	0	530	0	530	0	530	0	530	0	530	0	525	0	525	0	530	0	530	0	525	0	0	528.357	0.62553
1.6182	0	525	0	527	0	530	0	530	0	530	0	530	0	530	0	530	0	530	0	525	0	525	0	530	0	530	0	525	0	0	528.357	0.62553
1.6291	0	525	0	527	0	530	0	530	0	530	0	530	0	530	0	530	0	530	0	525	0	525	0	530	0	530	0	525	0	0	528.357	0.62553
1.6399	0	525	0	527	0	530	0	530	0	530	0	530	0	530	0	530	0	530	0	525	0	525	0	530	0	530	0	525	0	0	528.357	0.62553
1.6508	0	525	0	527	0	530	0	530	0	530	0	530	0	530	0	530	0	530	0	525	0	525	0	530	0	530	0	525	0	0	528.357	0.62553
1.6616	0	525	0	527	0	530	0	530	0	530	0	530	0	530	0	530	0	530	0	525	0	525	0	530	0	530	0	525	0	0	528.357	0.62553
1.6725	0	525	0	527	0	530	0	530	0	530	0	530	0	530	0	530	0	530	0	525	0	525	0	530	0	530	0	525	0	0	528.357	0.62553
1.6834	0	525	0	527	0	530	0	530	0	530	0	530	0	530	0	530	0	530	0	525	0	525	0	530	0	530	0	525	0	0	528.357	0.62553
1.6942	0	525	0	527	0	530	0	530	0	530	0	530	0	530	0	530	0	530	0	525	0	525	0	530	0	530	0	525	0	0	528.357	0.62553
1.7051	0	525	0	527	0	530	0	530	0	530	0	530	0	530	0	530	0	530	0	525	0	525	0	530	0	530	0	525	0	0	528.357	0.62553
1.7159	0	525	0	527	0	530	0	530	0	530	0	530	0	530	0	530	0	530	0	525	0	525	0	530	0	530	0	525	0	0	528.357	0.62553
1.7268	0	525	0	527	0	530	0	530	0	530	0	530	0	530	0	530	0	530	0	525	0	525	0	530	0	530	0	525	0	0	528.357	0.62553
1.7377	0	525	0	527	0	530	0	530	0	530	0	530	0	530	0	530	0	530	0	525	0	525	0	530	0	530	0	525	0	0	528.357	0.62553
1.7485	0	525	0	527	0	530	0	530	0	530	0	530	0	530	0	530	0	530	0	525	0	525	0	530	0	530	0	525	0	0	528.357	0.62553
1.7594	0	525	0	527	0	530	0	530	0	530	0	530	0	530	0	530	0	530	0	525	0	525	0	530	0	530	0	525	0	0	528.357	0.62553
1.7703	0	525	0	527	0	530	0	530	0	530	0	530	0	530	0	530	0	530	0	525	0	525	0	530	0	530	0	525	0	0	528.357	0.62553
1.7811	0	525	0	527	0	530	0	530	0	530	0	530	0	530	0	530	0	530	0	525	0	525	0	530	0	530	0	525	0	0	528.357	0.62553
1.792	0	525	0	527	0	530	0	530	0	530	0	530	0	530	0	530	0	530	0	525	0	525	0	530	0	530	0	525	0	0	528.357	0.62553
1.8028	0	525	0	527	0	530	0	530	0	530	0	530	0	530	0	530	0	530	0	525	0	525	0	530	0	530	0	525	0	0	528.357	0.62553
1.8137	0	525	0	527	0	530	0	530	0	530	0	530	0	530	0	530	0	530	0	525	0	525	0	530	0	530	0	525	0	0	528.357	0.62553
1.8246	0	525	0	527	0	530	0	530	0	530	0	530	0	530	0	530	0	530	0	525	0	525	0	530	0	530	0	525	0	0	528.357	0.62553
1.8354	0	525	0	527	0	530	0	530	0	530	0	530	0	530	0	530	0	530	0	525	0	525	0	530	0	530	0	525	0	0	528.357	0.62553
1.8463	0	525	0	527	0	530	0	530	0	530	0	530	0	530	0	530	0	530	0	525	0	525	0	530	0	530	0	525	0	0	528.357	0.62553
1.8571	0	525	0	527	0	530	0	530	0	530	0	530	0	530	0	530	0	530	0	525	0	525	0	530	0	530	0	525	0	0	528.357	0.62553
1.868	0	525	0	527	0	530	0	530	0	530	0	530	0	530	0	530	0	530	0	525	0	525	0	530	0	530	0	525	0	0	528.357	0.62553
1.8789	0	525	0	527	0	530	0	530	0	530	0	530	0	530	0	530	0	530	0	525	0	525	0	530	0	530	0	525	0	0	528.357	0.62553
1.8897	0	525	0	527	0	530	0	530	0	530	0	530	0	530	0	530	0	530	0	525	0	525	0	530	0	530	0	525	0	0	528.357	0.62553
1.9006	0	525	0	527	0	530	0	530	0	530	0	530	0	530	0	530	0	530	0	525	0	525	0	530	0	530	0	525	0	0	528.357	0.62553
1.9114	0	525	0	527	0	530	0	530	0	530	0	530	0	530	0	530	0	530	0	525	0	525	0	530	0	530	0	525	0	0	528.357	0.62553
1.9223	0	525	0	527	0	530	0	530	0	530	0	530	0	530	0	530	0	530	0	525	0	525	0	530	0	530	0	525	0	0	528.357	0.62553
1.9332	0	525	0	527	0	530	0	530	0	530	0	530	0	530	0	530	0	530	0	525	0	525	0	530	0	530	0	525	0	0	528.357	0.62553
1.944	0	525	0	527	0	530	0	530	0	530	0	530	0	530	0	530	0	530	0	525	0	525	0	530	0	530	0	525	0	0	528.357	0.62553
1.9549	0	525	0	527	0	530	0	530	0	530	0	530	0	530	0	530	0	530	0	525	0	525	0	530	0	530	0	525	0	0	528.357	0.62553
1.9657	0	525	0	527	0	530	0	530	0	530	0	530	0	530	0	530	0	530	0	525	0	525	0	530	0	530	0	525	0	0	528.357	0.62553
1.9766	0	525	0	527	0	530	0	530	0	530	0	530	0	530	0	530	0	530	0	525	0	525	0	530	0	530	0	525	0	0	528.357	0.62553
1.9875	0	525	0	527	0	530	0	530	0	530	0	530	0	530	0	530	0	530	0	525	0	525	0	530	0	530	0	525	0	0	528.357	0.62553
1.9983	0	525	0	527	0	530	0	530	0	530	0	530	0	530	0	530	0	530	0	525	0	525	0	530	0	530	0	525	0	0	528.357	0.62553
2.0092	0	525	0	527	0	530	0	530	0	530	0	530	0	530	0	530	0	530	0	525	0	525	0	530	0	530	0	525	0	0	528.357	0.62553
2.02	0	525	0	527	0	530	0	530	0	530	0	530	0	530	0	530	0	530	0	525	0	525	0	530	0	530	0	525	0	0	528.357	0.62553
2.0309	0	525	0	527	0	530	0	530	0	530	0	530	0	530	0	530	0	530	0	525	0	525	0	530	0	530	0	525	0	0	528.357	0.62553
2.0418	0	525	0	527	0	530	0	530	0	530	0	530	0	530	0	530	0	530	0	525	0	525	0	530	0	530	0	525	0	0	528.357	0.62553
2.0526	0	525	0	527	0	530	0	530	0	530	0	530	0	530	0	530	0	530	0	525	0	525	0	530	0	530	0	525	0	0	528.357	0.62553
2.0635	0	525	0	527	0	530	0	530	0	530	0	530	0	530	0	530	0	530	0	525	0	525	0	530	0	530	0	525	0	0	528.357	0.62553
2.0743	0	525	0	527	0	530	0	530	0	530	0	530	0	530	0	530	0	530	0	525	0	525	0	530	0	530	0	525	0	0	528.357	0.62553
2.0852	0	525	0	527	0	530	0	530	0	530	0	530	0	530	0	530	0	530	0	525	0	525	0	530	0	530	0	525	0	0	528.357	0.62553
2.0961	0	525	0	527	0	530	0	530	0	530	0	530	0	530	0	530	0	530	0	525	0	525	0	530	0	530	0	525	0	0	528.357	0.62553
2.1069	0	525	0	527	0	530	0	530	0	530	0	530	0	530	0	530	0	530	0	525	0	525	0	530	0	530	0	525	0	0	528.357	0.62553
2.1178	0	525	0	527	0	530	0	530	0	530	0	530	0	530	0	530	0	530	0	525	0	525	0	530	0	530	0	525	0	0	528.357	0.62553
2.1286	0	525	0	527	0	530	0	530	0	530	0	530	0	530	0	530	0	530	0	525	0	525	0	530	0	530	0	525	0	0	528.357	0.62553
2.1395	0	525	0	527	0	530	0	530	0	530	0	530	0	530	0	530	0	530	0	525	0	525	0	530	0	530	0	525	0	0	528.357	0.62553
2.1504	0	525	0	527	0	530	0	530	0	530	0	530	0	530	0	530	0	530	0	525	0	525	0	530	0	530	0	525	0	0	528.357	0.62553
2.1612	0	525	0	527	0	530	0	530	0	530	0	530	0	530	0	530	0	530	0	525	0	525	0	530	0	530	0	525	0	0	528.357	0.62553
2.1721	0	525	0	527	0	530	0	530	0	530	0	530	0	530	0	530	0	530	0	525	0	525	0	530	0	530	0	525	0	0	528.357	0.62553
2.1829	0	525	0	527	0	530	0	530	0	530	0	530	0	530	0	530	0	530	0	525	0	525	0	530	0	530	0	525	0	0	528.357	0.62553
2.1938	0	525	0	527	0	530	0	530	0	530	0	530	0	530	0	530	0	530	0	525	0	525	0	530	0	530	0	525	0	0	528.357	0.62553
2.2047	0	525	0	527	0	530	0	530	0	530	0	530	0	530	0	530	0	530	0	525	0	525	0	530	0	530	0	525	0	0	528.357	0.62553
2.2155	0	525	0	527	0	530	0	530	0	530	0	530	0	530	0	530	0	530	0	525	0	525	0	530	0	530	0	525	0	0	528.357	0.62553
2.2264	0	525	0	527	0	530	0	530	0	530	0	530	0	530	0	530	0	530	0	525	0	525	0	530	0	530	0	525	0	0	528.357	0.62553
2.2372	0	525	0	527	0	530	0	530	0	530	0	530	0	530	0	530	0	530	0	525	0	525	0	530	0	530	0	525	0	0	528.357	0.62553
2.2481	0	525	0	527	0	530	0	530	0	530	0	530	0	530	0	530	0	530	0	525	0	525	0	530	0	530	0	525	0	0	528.357	0.62553
2.259	0	525	0	527	0	530	0	530	0	530	0	530	0	530	0	530	0	530	0	525	0	525	0	530	0	530	0	525	0	0	528.357	0.62553
2.2698	0	525	0	527	0	530	0	530	0	530	0	530	0	530	0	530	0	530	0	525	0	525	0	530	0	530	0	525	0	0	528.357	0.62553
2.2807	0	525	0	527	0	530	0	530	0	530	0	530	0	530	0	530	0	530	0	525	0	525	0	530	0	530	0	525	0	0	528.357	0.62553
2.2916	0	525	0	527	0	530	0	530	0	530	0	530	0	530	0	530	0	530	0	525	0	525	0	530	0	530	0	525	0	0	528.357	0.62553
2.3024	0	525	0	527	0	530	0	530	0	530	0	530	0	530	0	530	0	530	0	525	0	525	0	530	0	530	0	525	0	0	528.357	0.62553
2.3133	0	525	0	527	0	530	0	530	0	530	0	530	0	530	0	530	0	530	0	525	0	525	0	530	0	530	0	525	0	0	528.357	0.62553
2.3241	0	525	0	527	0	530	0	530	0	530	0	530	0	530	0	530	0	530	0	525	0	525	0	530	0	530	0	525	0	0	528.357	0.62553
2.335	0	525	0	527	0	530	0	530	0	530	0	530	0	530	0	530	0	530	0	525	0	525	0	530	0	530	0	525	0	0	528.357	0.62553
2.3459	0	525	0	527	0	530	0	530	0	530	0	530	0	530	0	530	0	530	0	525	0	525	0	530	0	530	0	525	0	0	528.357	0.62553
2.3567	0	525	0	527	0	530	0	530	0	530	0	530	0	530	0	530	0	530	0	525	0	525	0	530	0	530	0	525	0	0	528.357	0.62553
2.3676	0	525	0	527	0	530	0	530	0	530	0	530	0	530	0	530	0	530	0	525	0	525	0	530	0	530	0	525	0	0	528.357	0.62553
2.3784	0	525	0	527	0	530	0	530	0	530	0	530	0	530	0	530	0	530	0	525	0	525	0	530	0	530	0	525	0	0	528.357	0.62553
2.3893	0	525	0	527	0	530	0	530	0	530	0	530	0	530	0	530	0	530	0	525	0	525	0	530	0	530	0	525	0	0	528.357	0.62553
2.4002	0	525	0	527	0	530	0	530	0	530	0	530	0	530	0	530	0	530	0	525	0	525	0	530	0	530	0	525	0	0	528.357	0.62553
2.411	0	525	0	527	0	530	0	530	0	530	0	530	0	530	0	530	0	530	0	525	0	525	0	530	0	530	0	525	0	0	528.357	0.62553
2.4219	0	525	0	527	0	530	0	530	0	530	0	530	0	530	0	530	0	530	0	525	0	525	0	530	0	530	0	525	0	0	528.357	0.62553
2.4327	0	525	0	527	0	530	0	530	0	530	0	530	0	530	0	530	0	530	0	525	0	525	0	530	0	530	0	525	0	0	528.357	0.62553
2.4436	0	525	0	527	0	530	0	530	0	530	0	530	0	530	0	530	0	530	0	525	0	525	0	530	0	530	0	525	0	0	528.357	0.62553
2.4545	0	525	0	527	0	530	0	530	0	530	0	530	0	530	0	530	0	530	0	525	0	525	0	530	0	530	0	525	0	0	528.357	0.62553
2.4653	0	525	0	527	0	530	0	530	0	530	0	530	0	530	0	530	0	530	0	525	0	525	0	530	0	530	0	525	0	0	528.357	0.62553
2.4762	0	525	0	527	0	530	0	530	0	530	0	530	0	530	0	530	0	530	0	525	0	525	0	530	0	530	0	525	0	0	528.357	0.62553
2.487	0	525	0	527	0	530	0	530	0	530	0	530	0	530	0	530	0	530	0	525	0	525	0	530	0	530	0	525	0	0	528.357	0.62553
2.4979	0	525	0	527	0	530	0	530	0	530	0	530	0	530	0	530	0	530	0	525	0	525	0	530	0	530	0	525	0	0	528.357	0.62553
2.5088	0	525	0	527	0	530	0	530	0	530	0	530	0	530	0	530	0	530	0	525	0	525	0	530	0	530	0	525	0	0	528.357	0.62553
2.5196	0	525	0	527	0	530	0	530	0	530	0	530	0	530	0	530	0	530	0	525	0	525	0	530	0	530	0	525	0	0	528.357	0.62553
2.5305	0	525	0	527	0	530	0	530	0	530	0	530	0	530	0	530	0	530	0	525	0	525	0	530	0	530	0	525	0	0	528.357	0.62553
2.5413	0	525	0	527	0	530	0	530	0	530	0	530	0	530	0	530	0	530	0	525	0	525	0	530	0	530	0	525	0	0	528.357	0.62553
2.5522	0	525	0	527	0	530	0	530	0	530	0	530	0	530	0	530	0	530	0	525	0	525	0	530	0	530	0	525	0	0	528.357	0.62553
2.5631	0	525	0	527	0	530	0	530	0	530	0	530	0	530	0	530	0	530	0	525	0	525	0	530	0	530	0	525	0	0	528.357	0.62553
2.5739	0	525	0	527	0	530	0	530	0	530	0	530	0	530	0	530	0	530	0	525	0	525	0	530	0	530	0	525	0	0	528.357	0.62553
2.5848	0	525	0	527	0	530	0	530	0	530	0	530	0	530	0	530	0	530	0	525	0	525	0	530	0	530	0	525	0	0	528.357	0.62553
2.5956	0	525	0	527	0	530	0	530	0	530	0	530	0	530	0	530	0	530	0	525	0	525	0	530	0	530	0	525	0	0	528.357	0.62553
2.6065	0	525	0	527	0	530	0	530	0	530	0	530	0	530	0	530	0	530	0	525	0	525	0	530	0	530	0	525	0	0	528.357	0.62553
2.6174	0	525	0	527	0	530	0	530	0	530	0	530	0	530	0	530	0	530	0	525	0	525	0	530	0	530	0	525	0	0	528.357	0.62553
2.6282	0	525	0	527	0	530	0	530	0	530	0	530	0	530	0	530	0	530	0	525	0	525	0	530	0	530	0	525	0	0	528.357	0.62553
2.6391	0	525	0	527	0	530	0	530	0	530	0	530	0	530	0	530	0	530	0	525	0	525	0	530	0	530	0	525	0	0	528.357	0.62553
2.6499	0	525	0	527	0	530	0	530	0	530	0	530	0	530	0	530	0	530	0	525	0	525	0	530	0	530	0	525	0	0	528.357	0.62553
2.6608	0	525	0	527	0	530	0	530	0	530	0	530	0	530	0	530	0	530	0	525	0	525	0	530	0	530	0	525	0	0	528.357	0.62553
2.6717	0	525	0	527	0	530	0	530	0	530	0	530	0	530	0	530	0	530	0	525	0	525	0	530	0	530	0	525	0	0	528.357	0.62553
2.6825	0	525	0	527	0	530	0	530	0	530	0	530	0	530	0	530	0	530	0	525	0	525	0	530	0	530	0	525	0	0	528.357	0.62553
2.6934	0	525	0	527	0	530	0	530	0	530	0	530	0	530	0	530	0	530	0	525	0	525	0	530	0	530	0	525	0	0	528.357	0.62553
2.7042	0	525	0	527	0	530	0	530	0	530	0	530	0	530	0	530	0	530	0	525	0	525	0	530	0	530	0	525	0	0	528.357	0.62553
2.7151	0	525	0	527	0	530	0	530	0	530	0	530	0	530	0	530	0	530	0	525	0	525	0	530	0	530	0	525	0	0	528.357	0.62553
2.726	0	525	0	527	0	530	0	530	0	530	0	530	0	530	0	530	0	530	0	525	0	525	0	530	0	530	0	525	0	0	528.357	0.62553
2.7368	0	525	0	527	0	530	0	530	0	530	0	530	0	530	0	530	0	530	0	525	0	525	0	530	0	530	0	525	0	0	528.357	0.62553
2.7477	0	525	0	527	0	530	0	530	0	530	0	530	0	530	0	530	0	530	0	525	0	525	0	530	0	530	0	525	0	0	528.357	0.62553
2.7586	0	525	0	527	0	530	0	530	0	530	0	530	0	530	0	530	0	530	0	525	0	525	0	530	0	530	0	525	0	0	528.357	0.62553
2.7694	0	525	0	527	0	530	0	530	0	530	0	530	0	530	0	530	0	530	0	525	0	525	0	530	0	530	0	525	0	0	528.357	0.62553
2.7803	0	525	0	527	0	530	0	530	0	530	0	530	0	530	0	530	0	530	0	525	0	525	0	530	0	530	0	525	0	0	528.357	0.62553
2.7911	0	525	0	527	0	530	0	530	0	530	0	530	0	530	0	530	0	530	0	525	0	525	0	530	0	530	0	525	0	0	528.357	0.62553
2.802	0	525	0	527	0	530	0	530	0	530	0	530	0	530	0	530	0	530	0	525	0	525	0	530	0	530	0	525	0	0	528.357	0.62553
2.8129	0	525	0	527	0	530	0	530	0	530	0	530	0	530	0	530	0	530	0	525	0	525	0	530	0	530	0	525	0	0	528.357	0.62553
2.8237	0	525	0	527	0	530	0	530	0	530	0	530	0	530	0	530	0	530	0	525	0	525	0	530	0	530	0	525	0	0	528.357	0.62553
2.8346	0	525	0	527	0	530	0	530	0	530	0	530	0	530	0	530	0	530	0	525	0	525	0	530	0	530	0	525	0	0	528.357	0.62553
2.8454	0	525	0	527	0	530	0	530	0	530	0	530	0	530	0	530	0	530	0	525	0	525	0	530	0	530	0	525	0	0	528.357	0.62553
2.8563	0	525	0	527	0	530	0	530	0	530	0	530	0	530	0	530	0	530	0	525	0	525	0	530	0	530	0	525	0	0	528.357	0.62553
2.8672	0	525	0	527	0	530	0	530	0	530	0	530	0	530	0	530	0	530	0	525	0	525	0	530	0	530	0	525	0	0	528.357	0.62553
2.878	0	525	0	527	0	530	0	530	0	530	0	530	0	530	0	530	0	530	0	525	0	525	0	530	0	530	0	525	0	0	528.357	0.62553
2.8889	0	525	0	527	0	530	0	530	0	530	0	530	0	530	0	530	0	530	0	525	0	525	0	530	0	530	0	525	0	0	528.357	0.62553
2.8997	0	525	0	527	0	530	0	530	0	530	0	530	0	530	0	530	0	530	0	525	0	525	0	530	0	530	0	525	0	0	528.357	0.62553
2.9106	0	525	0	527	0	530	0	530	0	530	0	530	0	530	0	530	0	530	0	525	0	525	0	530	0	530	0	525	0	0	528.357	0.62553
2.9215	0	525	0	527	0	530	0	530	0	530	0	530	0	530	0	530	0	530	0	525	0	525	0	530	0	530	0	525	0	0	528.357	0.62553
2.9323	0	525	0	527	0	530	0	530	0	530	0	530	0	530	0	530	0	530	0	525	0	525	0	530	0	530	0	525	0	0	528.357	0.62553
2.9432	0	525	0	527	0	530	0	530	0	530	0	530	0	530	0	530	0	530	0	525	0	525	0	530	0	530	0	525	0	0	528.357	0.62553
2.954	0	525	0	527	0	530	0	530	0	530	0	530	0	530	0	530	0	530	0	525	0	525	0	530	0	530	0	525	0	0	528.357	0.62553
2.9649	0	525	0	527	0	530	0	530	0	530	0	530	0	530	0	530	0	530	0	525	0	525	0	530	0	530	0	525	0	0	528.357	0.62553
2.9758	0	525	0	527	0	530	0	530	0	530	0	530	0	530	0	530	0	530	0	525	0	525	0	530	0	530	0	525	0	0	528.357	0.62553
2.9866	0	525	0	527	0	530	0	530	0	530	0	530	0	530	0	530	0	530	0	525	0	525	0	530	0	530	0	525	0	0	528.357	0.62553
2.9975	0	525	0	527	0	530	0	530	0	530	0	530	0	530	0	530	0	530	0	525	0	525	0	530	0	530	0	525	0	0	528.357	0.62553
3.0083	0	525	0	527	0	530	0	530	0	530	0	530	0	530	0	530	0	530	0	525	0	525	0	530	0	530	0	525	0	0	528.357	0.62553
3.0192	0	525	0	527	0	530	0	530	0	530	0	530	0	530	0	530	0	530	0	525	0	525	0	530	0	530	0	525	0	0	528.357	0.62553
3.0301	0	525	0	527	0	530	0	530	0	530	0	530	0	530	0	530	0	530	0	525	0	525	0	530	0	530	0	525	0	0	528.357	0.62553
3.0409	0	525	0	527	0	530	0	530	0	530	0	530	0	530	0	530	0	530	0	525	0	525	0	530	0	530	0	525	0	0	528.357	0.62553
3.0518	0	525	0	527	0	530	0	530	0	530	0	530	0	530	0	530	0	530	0	525	0	525	0	530	0	530	0	525	0	0	528.357	0.62553
3.0626	0	525	0	527	0	530	0	530	0	530	0	530	0	530	0	530	0	530	0	525	0	525	0	530	0	530	0	525	0	0	528.357	0.62553
3.0735	0	525	0	527	0	530	0	530	0	530	0	530	0	530	0	530	0	530	0	525	0	525	0	530	0	530	0	525	0	0	528.357	0.62553
3.0844	0	525	0	527	0	530	0	530	0	530	0	530	0	530	0	530	0	530	0	525	0	525	0	530	0	530	0	525	0	0	528.357	0.62553
3.0952	0	525	0	527	0	530	0	530	0	530	0	530	0	530	0	530	0	530	0	525	0	525	0	530	0	530	0	525	0	0	528.357	0.62553
3.1061	0	525	0	527	0	530	0	530	0	530	0	530	0	530	0	530	0	530	0	525	0	525	0	530	0	530	0	525	0	0	528.357	0.62553
3.1169	0	525	0	527	0	530	0	530	0	530	0	530	0	530	0	530	0	530	0	525	0	525	0	530	0	530	0	525	0	0	528.357	0.62553
3.1278	0	525	0	527	0	530	0	530	0	530	0	530	0	530	0	530	0	530	0	525	0	525	0	530	0	530	0	525	0	0	528.357	0.62553
3.1387	0	525	0	527	0	530	0	530	0	530	0	530	0	530	0	530	0	530	0	525	0	525	0	530	0	530	0	525	0	0	528.357	0.62553
3.1495	0	525	0	527	0	530	0	530	0	530	0	530	0	530	0	530	0	530	0	525	0	525	0	530	0	530	0	525	0	0	528.357	0.62553
3.1604	0	525	0	527	0	530	0	530	0	530	0	530	0	530	0	530	0	530	0	525	0	525	0	530	0	530	0	525	0	0	528.357	0.62553
3.1712	0	525	0	527	0	530	0	530	0	530	0	530	0	530	0	530	0	530	0	525	0	525	0	530	0	530	0	525	0	0	528.357	0.62553
3.1821	0	525	0	527	0	530	0	530	0	530	0	530	0	530	0	530	0	530	0	525	0	525	0	530	0	530	0	525	0	0	528.357	0.62553
3.193	0	525	0	527	0	530	0	530	0	530	0	530	0	530	0	530	0	530	0	525	0	525	0	530	0	530	0	525	0	0	528.357	0.62553
3.2038	0	525	0	527	0	530	0	530	0	530	0	530	0	530	0	530	0	530	0	525	0	525	0	530	0	530	0	525	0	0	528.357	0.62553
3.2147	0	525	0	527	0	530	0	530	0	530	0	530	0	530	0	530	0	530	0	525	0	525	0	530	0	530	0	525	0	0	528.357	0.62553
3.2255	0	525	0	527	0	530	0	530	0	530	0	530	0	530	0	530	0	530	0	525	0	525	0	530	0	530	0	525	0	0	528.357	0.62553
3.2364	0	525	0	527	0	530	0	530	0	530	0	530	0	530	0	530	0	530	0	525	0	525	0	530	0	530	0	525	0	0	528.357	0.62553
3.2473	0	525	0	527	0	530	0	530	0	530	0	530	0	530	0	530	0	530	0	525	0	525	0	530	0	530	0	525	0	0	528.357	0.62553
3.2581	0	525	0	527	0	530	0	530	0	530	0	530	0	530	0	530	0	530	0	525	0	525	0	530	0	530	0	525	0	0	528.357	0.62553
3.269	0	525	0	527	0	530	0	530	0	530	0	530	0	530	0	530	0	530	0	525	0	525	0	530	0	530	0	525	0	0	528.357	0.62553
3.2799	0	525	0	527	0	530	0	530	0	530	0	530	0	530	0	530	0	530	0	525	0	525	0	530	0	530	0	525	0	0	528.357	0.62553
3.2907	0	525	0	527	0	530	0	530	0	530	0	530	0	530	0	530	0	530	0	525	0	525	0	530	0	530	0	525	0	0	528.357	0.62553
3.3016	0	525	0	527	0	530	0	530	0	530	0	530	0	530	0	530	0	530	0	525	0	525	0	530	0	530	0	525	0	0	528.357	0.62553
3.3124	0	525	0	527	0	530	0	530	0	530	0	530	0	530	0	530	0	530	0	525	0	525	0	530	0	530	0	525	0	0	528.357	0.62553
3.3233	0	525	0	527	0	530	0	530	0	530	0	530	0	530	0	530	0	530	0	525	0	525	0	530	0	530	0	525	0	0	528.357	0.62553
3.3342	0	525	0	527	0	530	0	530	0	530	0	530	0	530	0	530	0	530	0	525	0	525	0	530	0	530	0	525	0	0	528.357	0.62553
3.345	0	525	0	527	0	530	0	530	0	530	0	530	0	530	0	530	0	530	0	525	0	525	0	530	0	530	0	525	0	0	528.357	0.62553
3.3559	0	525	0	527	0	530	0	530	0	530	0	530	0	530	0	530	0	530	0	525	0	525	0	530	0	530	0	525	0	0	528.357	0.62553
3.3667	0	525	0	527	0	530	0	530	0	530	0	530	0	530	0	530	0	530	0	525	0	525	0	530	0	530	0	525	0	0	528.357	0.62553
3.3776	0	525	0	527	0	530	0	530	0	530	0	530	0	530	0	530	0	530	0	525	0	525	0	530	0	530	0	525	0	0	528.357	0.62553
3.3885	0	525	0	527	0	530	0	530	0	530	0	530	0	530	0	530	0	530	0	525	0	525	0	530	0	530	0	525	0	0	528.357	0.62553
3.3993	0	525	0	527	0	530	0	530	0	530	0	530	0	530	0	530	0	530	0	525	0	525	0	530	0	530	0	525	0	0	528.357	0.62553
3.4102	0	525	0	527	0	530	0	530	0	530	0	530	0	530	0	530	0	530	0	525	0	525	0	530	0	530	0	525	0	0	528.357	0.62553
3.421	0	525	0	527	0	530	0	530	0	530	0	530	0	530	0	530	0	530	0	525	0	525	0	530	0	530	0	525	0	0	528.357	0.62553
3.4319	0	525	0	527	0	530	0	530	0	530	0	530	0	530	0	530	0	530	0	525	0	525	0	530	0	530	0	525	0	0	528.357	0.62553
3.4428	0	525	0	527	0	530	0	530	0	530	0	530	0	530	0	530	0	530	0	525	0	525	0	530	0	530	0	525	0	0	528.357	0.62553
3.4536	0	525	0	527	0	530	0	530	0	530	0	530	0	530	0	530	0	530	0	525	0	525	0	530	0	530	0	525	0	0	528.357	0.62553
3.4645	0	525	0	527	0	530	0	530	0	530	0	530	0	530	0	530	0	530	0	525	0	525	0	530	0	530	0	525	0	0	528.357	0.62553
3.4753	0	525	0	527	0	530	0	530	0	530	0	530	0	530	0	530	0	530	0	525	0	525	0	530	0	530	0	525	0	0	528.357	0.62553
3.4862	0	525	0	527	0	530	0	530	0	530	0	530	0	530	0	530	0	530	0	525	0	525	0	530	0	530	0	525	0	0	528.357	0.62553
3.4971	0	525	0	527	0	530	0	530	0	530	0	530	0	530	0	530	0	530	0	525	0	525	0	530	0	530	0	525	0	0	528.357	0.62553
3.5079	0	525	0	527	0	530	0	530	0	530	0	530	0	530	0	530	0	530	0	525	0	525	0	530	0	530	0	525	0	0	528.357	0.62553
3.5188	0	525	0	527	0	530	0	530	0	530	0	530	0	530	0	530	0	530	0	525	0	525	0	530	0	530	0	525	0	0	528.357	0.62553
3.5296	0	525	0	527	0	530	0	530	0	530	0	530	0	530	0	530	0	530	0	525	0	525	0	530	0	530	0	525	0	0	528.357	0.62553
3.5405	0	525	0	527	0	530	0	530	0	530	0	530	0	530	0	530	0	530	0	525	0	525	0	530	0	530	0	525	0	0	528.357	0.62553
3.5514	0	525	0	527	0	530	0	530	0	530	0	530	0	530	0	530	0	530	0	525	0	525	0	530	0	530	0	525	0	0	528.357	0.62553
3.5622	0	525	0	527	0	530	0	530	0	530	0	530	0	530	0	530	0	530	0	525	0	525	0	530	0	530	0	525	0	0	528.357	0.62553
3.5731	0	525	0	527	0	530	0	530	0	530	0	530	0	530	0	530	0	530	0	525	0	525	0	530	0	530	0	525	0	0	528.357	0.62553
3.5839	0	525	0	527	0	530	0	530	0	530	0	530	0	530	0	530	0	530	0	525	0	525	0	530	0	530	0	525	0	0	528.357	0.62553
3.5948	0	525	0	527	0	530	0	530	0	530	0	530	0	530	0	530	0	530	0	525	0	525	0	530	0	530	0	525	0	0	528.357	0.62553
3.6057	0	525	0	527	0	530	0	530	0	530	0	530	0	530	0	530	0	530	0	525	0	525	0	530	0	530	0	525	0	0	528.357	0.62553
3.6165	0	525	0	527	0	530	0	530	0	530	0	530	0	530	0	530	0	530	0	525	0	525	0	530	0	530	0	525	0	0	528.357	0.62553
3.6274	0	525	0	527	0	530	0	530	0	530	0	530	0	530	0	530	0	530	0	525	0	525	0	530	0	530	0	525	0	0	528.357	0.62553
3.6382	0	525	0	527	0	530	0	530	0	530	0	530	0	530	0	530	0	530	0	525	0	525	0	530	0	530	0	525	0	0	528.357	0.62553
3.6491	0	525	0	527	0	530	0	530	0	530	0	530	0	530	0	530	0	530	0	525	0	525	0	530	0	530	0	525	0	0	528.357	0.62553
3.66	0	525	0	527	0	530	0	530	0	530	0	530	0	530	0	530	0	530	0	525	0	525	0	530	0	530	0	525	0	0	528.357	0.62553
3.6708	0	525	0	527	0	530	0	530	0	530	0	530	0	530	0	530	0	530	0	525	0	525	0	530	0	530	0	525	0	0	528.357	0.62553
3.6817	0	525	0	527	0	530	0	530	0	530	0	530	0	530	0	530	0	530	0	525	0	525	0	530	0	530	0	525	0	0	528.357	0.62553
3.6925	0	525	0	527	0	530	0	530	0	530	0	530	0	530	0	530	0	530	0	525	0	525	0	530	0	530	0	525	0	0	528.357	0.62553
3.7034	0	525	0	527	0	530	0	530	0	530	0	530	0	530	0	530	0	530	0	525	0	525	0	530	0	530	0	525	0	0	528.357	0.62553
3.7143	0	525	0	527	0	530	0	530	0	530	0	530	0	530	0	530	0	530	0	525	0	525	0	530	0	530	0	525	0	0	528.357	0.62553
3.7251	0	525	0	527	0	530	0	530	0	530	0	530	0	530	0	530	0	530	0	525	0	525	0	530	0	530	0	525	0	0	528.357	0.62553
3.736	0	525	0	527	0	530	0	530	0	530	0	530	0	530	0	530	0	530	0	525	0	525	0	530	0	530	0	525	0	0	528.357	0.62553
3.7469	0	525	0	527	0	530	0	530	0	530	0	530	0	530	0	530	0	530	0	525	0	525	0	530	0	530	0	525	0	0	528.357	0.62553
3.7577	0	525	0	527	0	530	0	530	0	530	0	530	0	530	0	530	0	530	0	525	0	525	0	530	0	530	0	525	0	0	528.357	0.62553
3.7686	0	525	0	527	0	530	0	530	0	530	0	530	0	530	0	530	0	530	0	525	0	525	0	530	0	530	0	525	0	0	528.357	0.62553
3.7794	0	525	0	527	0	530	0	530	0	530	0	530	0	530	0	530	0	530	0	525	0	525	0	530	0	530	0	525	0	0	528.357	0.62553
3.7903	0	525	0	527	0	530	0	530	0	530	0	530	0	530	0	530	0	530	0	525	0	525	0	530	0	530	0	525	0	0	528.357	0.62553
3.8012	0	525	0	527	0	530	0	530	0	530	0	530	0	530	0	530	0	530	0	525	0	525	0	530	0	530	0	525	0	0	528.357	0.62553
3.812	0	525	0	527	0	530	0	530	0	530	0	530	0	530	0	530	0	530	0	525	0	525	0	530	0	530	0	525	0	0	528.357	0.62553
3.8229	0	525	0	527	0	530	0	530	0	530	0	530	0	530	0	530	0	530	0	525	0	525	0	530	0	530	0	525	0	0	528.357	0.62553
3.8337	0	525	0	527	0	530	0	530	0	530	0	530	0	530	0	530	0	530	0	525	0	525	0	530	0	530	0	525	0	0	528.357	0.62553
3.8446	0	525	0	527	0	530	0	530	0	530	0	530	0	530	0	530	0	530	0	525	0	525	0	530	0	530	0	525	0	0	528.357	0.62553
3.8555	0	525	0	527	0	530	0	530	0	530	0	530	0	530	0	530	0	530	0	525	0	525	0	530	0	530	0	525	0	0	528.357	0.62553
3.8663	0	525	0	527	0	530	0	530	0	530	0	530	0	530	0	530	0	530	0	525	0	525	0	530	0	530	0	525	0	0	528.357	0.62553
3.8772	0	525	0	527	0	530	0	530	0	530	0	530	0	530	0	530	0	530	0	525	0	525	0	530	0	530	0	525	0	0	528.357	0.62553
3.888	0	525	0	527	0	530	0	530	0	530	0	530	0	530	0	530	0	530	0	525	0	525	0	530	0	530	0	525	0	0	528.357	0.62553
3.8989	0	525	0	527	0	530	0	530	0	530	0	530	0	530	0	530	0	530	0	525	0	525	0	530	0	530	0	525	0	0	528.357	0.62553
3.9098	0	525	0	527	0	530	0	530	0	530	0	530	0	530	0	530	0	530	0	525	0	525	0	530	0	530	0	525	0	0	528.357	0.62553
3.9206	0	525	0	527	0	530	0	530	0	530	0	530	0	530	0	530	0	530	0	525	0	525	0	530	0	530	0	525	0	0	528.357	0.62553
3.9315	0	525	0	527	0	530	0	530	0	530	0	530	0	530	0	530	0	530	0	525	0	525	0	530	0	530	0	525	0	0	528.357	0.62553
3.9423	0	525	0	527	0	530	0	530	0	530	0	530	0	530	0	530	0	530	0	525	0	525	0	530	0	530	0	525	0	0	528.357	0.62553
3.9532	0	525	0	527	0	530	0	530	0	530	0	530	0	530	0	530	0	530	0	525	0	525	0	530	0	530	0	525	0	0	528.357	0.62553
3.9641	0	525	0	527	0	530	0	530	0	530	0	530	0	530	0	530	0	530	0	525	0	525	0	530	0	530	0	525	0	0	528.357	0.62553
3.9749	0	525	0	527	0	530	0	530	0	530	0	530	0	530	0	530	0	530	0	525	0	525	0	530	0	530	0	525	0	0	528.357	0.62553
3.9858	0	525	0	527	0	530	0	530	0	530	0	530	0	530	0	530	0	530	0	525	0	525	0	530	0	530	0	525	0	0	528.357	0.62553
3.9966	0	525	0	527	0	530	0	530	0	530	0	530	0	530	0	530	0	530	0	525	0	525	0	530	0	530	0	525	0	0	528.357	0.62553
4.0075	0	525	0	527	0	530	0	530	0	530	0	530	0	530	0	530	0	530	0	525	0	525	0	530	0	530	0	525	0	0	528.357	0.62553
4.0184	0	525	0	527	0	530	0	530	0	530	0	530	0	530	0	530	0	530	0	525	0	525	0	530	0	530	0	525	0	0	528.357	0.62553
4.0292	0	525	0	527	0	530	0	530	0	530	0	530	0	530	0	530	0	530	0	525	0	525	0	530	0	530	0	525	0	0	528.357	0.62553
4.0401	0	525	0	527	0	530	0	530	0	530	0	530	0	530	0	530	0	530	0	525	0	525	0	530	0	530	0	525	0	0	528.357	0.62553
4.0509	0	525	0	527	0	530	0	530	0	530	0	530	0	530	0	530	0	530	0	525	0	525	0	530	0	530	0	525	0	0	528.357	0.62553
4.0618	0	525	0	527	0	530	0	530	0	530	0	530	0	530	0	530	0	530	0	525	0	525	0	530	0	530	0	525	0	0	528.357	0.62553
4.0727	0	525	0	527	0	530	0	530	0	530	0	530	0	530	0	530	0	530	0	525	0	525	0	530	0	530	0	525	0	0	528.357	0.62553
4.0835	0	525	0	527	0	530	0	530	0	530	0	530	0	530	0	530	0	530	0	525	0	525	0	530	0	530	0	525	0	0	528.357	0.62553
4.0944	0	525	0	527	0	530	0	530	0	530	0	530	0	530	0	530	0	530	0	525	0	525	0	530	0	530	0	525	0	0	528.357	0.62553
4.1052	0	525	0	527	0	530	0	530	0	530	0	530	0	530	0	530	0	530	0	525	0	525	0	530	0	530	0	525	0	0	528.357	0.62553
4.1161	0	525	0	527	0	530	0	530	0	530	0	530	0	530	0	530	0	530	0	525	0	525	0	530	0	530	0	525	0	0	528.357	0.62553
4.127	0	525	0	527	0	530	0	530	0	530	0	530	0	530	0	530	0	530	0	525	0	525	0	530	0	530	0	525	0	0	528.357	0.62553
4.1378	0	525	0	527	0	530	0	530	0	530	0	530	0	530	0	530	0	530	0	525	0	525	0	530	0	530	0	525	0	0	528.357	0.62553
4.1487	0	525	0	527	0	530	0	530	0	530	0	530	0	530	0	530	0	530	0	525	0	525	0	530	0	530	0	525	0	0	528.357	0.62553
4.1595	0	525	0	527	0	530	0	530	0	530	0	530	0	530	0	530	0	530	0	525	0	525	0	530	0	530	0	525	0	0	528.357	0.62553
4.1704	0	525	0	527	0	530	0	530	0	530	0	530	0	530	0	530	0	530	0	525	0	525	0	530	0	530	0	525	0	0	528.357	0.62553
4.1813	0	525	0	527	0	530	0	530	0	530	0	530	0	530	0	530	0	530	0	525	0	525	0	530	0	530	0	525	0	0	528.357	0.62553
4.1921	0	525	0	527	0	530	0	530	0	530	0	530	0	530	0	530	0	530	0	525	0	525	0	530	0	530	0	525	0	0	528.357	0.62553
4.203	0	525	0	527	0	530	0	530	0	530	0	530	0	530	0	530	0	530	0	525	0	525	0	530	0	530	0	525	0	0	528.357	0.62553
4.2138	0	525	0	527	0	530	0	530	0	530	0	530	0	530	0	530	0	530	0	525	0	525	0	530	0	530	0	525	0	0	528.357	0.62553
4.2247	0	525	0	527	0	530	0	530	0	530	0	530	0	530	0	530	0	530	0	525	0	525	0	530	0	530	0	525	0	0	528.357	0.62553
4.2356	0	525	0	527	0	530	0	530	0	530	0	530	0	530	0	530	0	530	0	525	0	525	0	530	0	530	0	525	0	0	528.357	0.62553
4.2464	0	525	0	527	0	530	0	530	0	530	0	530	0	530	0	530	0	530	0	525	0	525	0	530	0	530	0	525	0	0	528.357	0.62553
4.2573	0	525	0	527	0	530	0	530	0	530	0	530	0	530	0	530	0	530	0	525	0	525	0	530	0	530	0	525	0	0	528.357	0.62553
4.2682	0	525	0	527	0	530	0	530	0	530	0	530	0	530	0	530	0	530	0	525	0	525	0	530	0	530	0	525	0	0	528.357	0.62553
4.279	0	525	0	527	0	530	0	530	0	530	0	530	0	530	0	530	0	530	0	525	0	525	0	530	0	530	0	525	0	0	528.357	0.62553
4.2899	0	525	0	527	0	530	0	530	0	530	0	530	0	530	0	530	0	530	0	525	0	525	0	530	0	530	0	525	0	0	528.357	0.62553
4.3007	0	525	0	527	0	530	0	530	0	530	0	530	0	530	0	530	0	530	0	525	0	525	0	530	0	530	0	525	0	0	528.357	0.62553
4.3116	0	525	0	527	0	530	0	530	0	530	0	530	0	530	0	530	0	530	0	525	0	525	0	530	0	530	0	525	0	0	528.357	0.62553
4.3225	0	525	0	527	0	530	0	530	0	530	0	530	0	530	0	530	0	530	0	525	0	525	0	530	0	530	0	525	0	0	528.357	0.62553
4.3333	0	525	0	527	0	530	0	530	0	530	0	530	0	530	0	530	0	530	0	525	0	525	0	530	0	530	0	525	0	0	528.357	0.62553
4.3442	0	525	0	527	0	530	0	530	0	530	0	530	0	530	0	530	0	530	0	525	0	525	0	530	0	530	0	525	0	0	528.357	0.62553
4.355	0	525	0	527	0	530	0	530	0	530	0	530	0	530	0	530	0	530	0	525	0	525	0	530	0	530	0	525	0	0	528.357	0.62553
4.3659	0	525	0	527	0	530	0	530	0	530	0	530	0	530	0	530	0	530	0	525	0	525	0	530	0	530	0	525	0	0	528.357	0.62553
4.3768	0	525	0	527	0	530	0	530	0	530	0	530	0	530	0	530	0	530	0	525	0	525	0	530	0	530	0	525	0	0	528.357	0.62553
4.3876	0	525	0	527	0	530	0	530	0	530	0	530	0	530	0	530	0	530	0	525	0	525	0	530	0	530	0	525	0	0	528.357	0.62553
4.3985	0	525	0	527	0	530	0	530	0	530	0	530	0	530	0	530	0	530	0	525	0	525	0	530	0	530	0	525	0	0	528.357	0.62553
4.4093	0	525	0	527	0	530	0	530	0	530	0	530	0	530	0	530	0	530	0	525	0	525	0	530	0	530	0	525	0	0	528.357	0.62553
4.4202	0	525	0	527	0	530	0	530	0	530	0	530	0	530	0	530	0	530	0	525	0	525	0	530	0	530	0	525	0	0	528.357	0.62553
4.4311	0	525	0	527	0	530	0	530	0	530	0	530	0	530	0	530	0	530	0	525	0	525	0	530	0	530	0	525	0	0	528.357	0.62553
4.4419	0	525	0	527	0	530	0	530	0	530	0	530	0	530	0	530	0	530	0	525	0	525	0	530	0	530	0	525	0	0	528.357	0.62553
4.4528	0	525	0	527	0	530	0	530	0	530	0	530	0	530	0	530	0	530	0	525	0	525	0	530	0	530	0	525	0	0	528.357	0.62553
4.4636	0	525	0	527	0	530	0	530	0	530	0	530	0	530	0	530	0	530	0	525	0	525	0	530	0	530	0	525	0	0	528.357	0.62553
4.4745	0	525	0	527	0	530	0	530	0	530	0	530	0	530	0	530	0	530	0	525	0	525	0	530	0	530	0	525	0	0	528.357	0.62553
4.4854	0	525	0	527	0	530	0	530	0	530	0	530	0	530	0	530	0	530	0	525	0	525	0	530	0	530	0	525	0	0	528.357	0.62553
4.4962	0	525	0	527	0	530	0	530	0	530	0	530	0	530	0	530	0	530	0	525	0	525	0	530	0	530	0	525	0	0	528.357	0.62553
4.5071	0	525	0	527	0	530	0	530	0	530	0	530	0	530	0	530	0	530	0	525	0	525	0	530	0	530	0	525	0	0	528.357	0.62553
4.5179	0	525	0	527	0	530	0	530	0	530	0	530	0	530	0	530	0	530	0	525	0	525	0	530	0	530	0	525	0	0	528.357	0.62553
4.5288	0	525	0	527	0	530	0	530	0	530	0	530	0	530	0	530	0	530	0	525	0	525	0	530	0	530	0	525	0	0	528.357	0.62553
4.5397	0	525	0	527	0	530	0	530	0	530	0	530	0	530	0	530	0	530	0	525	0	525	0	530	0	530	0	525	0	0	528.357	0.62553
4.5505	0	525	0	527	0	530	0	530	0	530	0	530	0	530	0	530	0	530	0	525	0	525	0	530	0	530	0	525	0	0	528.357	0.62553
4.5614	0	525	0	527	0	530	0	530	0	530	0	530	0	530	0	530	0	530	0	525	0	525	0	530	0	530	0	525	0	0	528.357	0.62553
4.5722	0	525	0	527	0	530	0	530	0	530	0	530	0	530	0	530	0	530	0	525	0	525	0	530	0	530	0	525	0	0	528.357	0.62553
4.5831	0	525	0	527	0	530	0	530	0	530	0	530	0	530	0	530	0	530	0	525	0	525	0	530	0	530	0	525	0	0	528.357	0.62553
4.594	0	525	0	527	0	530	0	530	0	530	0	530	0	530	0	530	0	530	0	525	0	525	0	530	0	530	0	525	0	0	528.357	0.62553
4.6048	0	525	0	527	0	530	0	530	0	530	0	530	0	530	0	530	0	530	0	525	0	525	0	530	0	530	0	525	0	0	528.357	0.62553
4.6157	0	525	0	527	0	530	0	530	0	530	0	530	0	530	0	530	0	530	0	525	0	525	0	530	0	530	0	525	0	0	528.357	0.62553
4.6265	0	525	0	527	0	530	0	530	0	530	0	530	0	530	0	530	0	530	0	525	0	525	0	530	0	530	0	525	0	0	528.357	0.62553
4.6374	0	525	0	527	0	530	0	530	0	530	0	530	0	530	0	530	0	530	0	525	0	525	0	530	0	530	0	525	0	0	528.357	0.62553
4.6483	0	525	0	527	0	530	0	530	0	530	0	530	0	530	0	530	0	530	0	525	0	525	0	530	0	530	0	525	0	0	528.357	0.62553
4.6591	0	525	0	527	0	530	0	530	0	530	0	530	0	530	0	530	0	530	0	525	0	525	0	530	0	530	0	525	0	0	528.357	0.62553
4.67	0	525	0	527	0	530	0	530	0	530	0	530	0	530	0	530	0	530	0	525	0	525	0	530	0	530	0	525	0	0	528.357	0.62553
4.6808	0	525	0	527	0	530	0	530	0	530	0	530	0	530	0	530	0	530	0	525	0	525	0	530	0	530	0	525	0	0	528.357	0.62553
4.6917	0	525	0	527	0	530	0	530	0	530	0	530	0	530	0	530	0	530	0	525	0	525	0	530	0	530	0	525	0	0	528.357	0.62553
4.7026	0	525	0	527	0	530	0	530	0	530	0	530	0	530	0	530	0	530	0	525	0	525	0	530	0	530	0	525	0	0	528.357	0.62553
4.7134	0	525	0	527	0	530	0	530	0	530	0	530	0	530	0	530	0	530	0	525	0	525	0	530	0	530	0	525	0	0	528.357	0.62553
4.7243	0	525	0	527	0	530	0	530	0	530	0	530	0	530	0	530	0	530	0	525	0	525	0	530	0	530	0	525	0	0	528.357	0.62553
4.7352	0	525	0	527	0	530	0	530	0	530	0	530	0	530	0	530	0	530	0	525	0	525	0	530	0	530	0	525	0	0	528.357	0.62553
4.746	0	525	0	527	0	530	0	530	0	530	0	530	0	530	0	530	0	530	0	525	0	525	0	530	0	530	0	525	0	0	528.357	0.62553
4.7569	0	525	0	527	0	530	0	530	0	530	0	530	0	530	0	530	0	530	0	525	0	525	0	530	0	530	0	525	0	0	528.357	0.62553
4.7677	0	525	0	527	0	530	0	530	0	530	0	530	0	530	0	530	0	530	0	525	0	525	0	530	0	530	0	525	0	0	528.357	0.62553
4.7786	0	525	0	527	0	530	0	530	0	530	0	530	0	530	0	530	0	530	0	525	0	525	0	530	0	530	0	525	0	0	528.357	0.62553
4.7895	0	525	0	527	0	530	0	530	0	530	0	530	0	530	0	530	0	530	0	525	0	525	0	530	0	530	0	525	0	0	528.357	0.62553
4.8003	0	525	0	527	0	530	0	530	0	530	0	530	0	530	0	530	0	530	0	525	0	525	0	530	0	530	0	525	0	0	528.357	0.62553
4.8112	0	525	0	527	0	530	0	530	0	530	0	530	0	530	0	530	0	530	0	525	0	525	0	530	0	530	0	525	0	0	528.357	0.62553
4.822	0	525	0	527	0	530	0	530	0	530	0	530	0	530	0	530	0	530	0	525	0	525	0	530	0	530	0	525	0	0	528.357	0.62553
4.8329	0	525	0	527	0	530	0	530	0	530	0	530	0	530	0	530	0	530	0	525	0	525	0	530	0	530	0	525	0	0	528.357	0.62553
4.8438	0	525	0	527	0	530	0	530	0	530	0	530	0	530	0	530	0	530	0	525	0	525	0	530	0	530	0	525	0	0	528.357	0.62553
4.8546	0	525	0	527	0	530	0	530	0	530	0	530	0	530	0	530	0	530	0	525	0	525	0	530	0	530	0	525	0	0	528.357	0.62553
4.8655	0	525	0	527	0	530	0	530	0	530	0	530	0	530	0	530	0	530	0	525	0	525	0	530	0	530	0	525	0	0	528.357	0.62553
4.8763	0	525	0	527	0	530	0	530	0	530	0	530	0	530	0	530	0	530	0	525	0	525	0	530	0	530	0	525	0	0	528.357	0.62553
4.8872	0	525	0	527	0	530	0	530	0	530	0	530	0	530	0	530	0	530	0	525	0	525	0	530	0	530	0	525	0	0	528.357	0.62553
4.8981	0	525	0	527	0	530	0	530	0	530	0	530	0	530	0	530	0	530	0	525	0	525	0	530	0	530	0	525	0	0	528.357	0.62553
4.9089	0	525	0	527	0	530	0	530	0	530	0	530	0	530	0	530	0	530	0	525	0	525	0	530	0	530	0	525	0	0	528.357	0.62553
4.9198	0	525	0	527	0	530	0	530	0	530	0	530	0	530	0	530	0	530	0	525	0	525	0	530	0	530	0	525	0	0	528.357	0.62553
4.9306	0	525	0	527	0	530	0	530	0	530	0	530	0	530	0	530	0	530	0	525	0	525	0	530	0	530	0	525	0	0	528.357	0.62553
4.9415	0	525	0	527	0	530	0	530	0	530	0	530	0	530	0	530	0	530	0	525	0	525	0	530	0	530	0	525	0	0	528.357	0.62553
4.9524	0	525	0	527	0	530	0	530	0	530	0	530	0	530	0	530	0	530	0	525	0	525	0	530	0	530	0	525	0	0	528.357	0.62553
4.9632	0	525	0	527	0	530	0	530	0	530	0	530	0	530	0	530	0	530	0	525	0	525	0	530	0	530	0	525	0	0	528.357	0.62553
4.9741	0	525	0	527	0	530	0	530	0	530	0	530	0	530	0	530	0	530	0	525	0	525	0	530	0	530	0	525	0	0	528.357	0.62553
4.9849	0	525	0	527	0	530	0	530	0	530	0	530	0	530	0	530	0	530	0	525	0	525	0	530	0	530	0	525	0	0	528.357	0.62553
4.9958	0	525	0	527	0	530	0	530	0	530	0	530	0	530	0	530	0	530	0	525	0	525	0	530	0	530	0	525	0	0	528.357	0.62553
5.0067	0	525	0	527	0	530	0	530	0	530	0	530	0	530	0	530	0	530	0	525	0	525	0	530	0	530	0	525	0	0	528.357	0.62553
5.0175	0	525	0	527	0	530	0	530	0	530	0	530	0	530	0	530	0	530	0	525	0	525	0	530	0	530	0	525	0	0	528.357	0.62553
5.0284	0	525	0	527	0	530	0	530	0	530	0	530	0	530	0	530	0	530	0	525	0	525	0	530	0	530	0	525	0	0	528.357	0.62553
5.0392	0	525	0	527	0	530	0	530	0	530	0	530	0	530	0	530	0	530	0	525	0	525	0	530	0	530	0	525	0	0	528.357	0.62553
5.0501	0	525	0	527	0	530	0	530	0	530	0	530	0	530	0	530	0	530	0	525	0	525	0	530	0	530	0	525	0	0	528.357	0.62553
5.061	0	525	0	527	0	530	0	530	0	530	0	530	0	530	0	530	0	530	0	525	0	525	0	530	0	530	0	525	0	0	528.357	0.62553
5.0718	0	525	0	527	0	530	0	530	0	530	0	530	0	530	0	530	0	530	0	525	0	525	0	530	0	530	0	525	0	0	528.357	0.62553
5.0827	0	525	0	527	0	530	0	530	0	530	0	530	0	530	0	530	0	530	0	525	0	525	0	530	0	530	0	525	0	0	528.357	0.62553
5.0935	0	525	0	527	0	530	0	530	0	530	0	530	0	530	0	530	0	530	0	525	0	525	0	530	0	530	0	525	0	0	528.357	0.62553
5.1044	0	525	0	527	0	530	0	530	0	530	0	530	0	530	0	530	0	530	0	525	0	525	0	530	0	530	0	525	0	0	528.357	0.62553
5.1153	0	525	0	527	0	530	0	530	0	530	0	530	0	530	0	530	0	530	0	525	0	525	0	530	0	530	0	525	0	0	528.357	0.62553
5.1261	0	525	0	527	0	530	0	530	0	530	0	530	0	530	0	530	0	530	0	525	0	525	0	530	0	530	0	525	0	0	528.357	0.62553
5.137	0	525	0	527	0	530	0	530	0	530	0	530	0	530	0	530	0	530	0	525	0	525	0	530	0	530	0	525	0	0	528.357	0.62553
5.1478	0	525	0	527	0	530	0	530	0	530	0	530	0	530	0	530	0	530	0	525	0	525	0	530	0	530	0	525	0	0	528.357	0.62553
5.1587	0	525	0	527	0	530	0	530	0	530	0	530	0	530	0	530	0	530	0	525	0	525	0	530	0	530	0	525	0	0	528.357	0.62553
5.1696	0	525	0	527	0	530	0	530	0	530	0	530	0	530	0	530	0	530	0	525	0	525	0	530	0	530	0	525	0	0	528.357	0.62553
5.1804	0	525	0	527	0	530	0	530	0	530	0	530	0	530	0	530	0	530	0	525	0	525	0	530	0	530	0	525	0	0	528.357	0.62553
5.1913	0	525	0	527	0	530	0	530	0	530	0	530	0	530	0	530	0	530	0	525	0	525	0	530	0	530	0	525	0	0	528.357	0.62553
5.2021	0	525	0	527	0	530	0	530	0	530	0	530	0	530	0	530	0	530	0	525	0	525	0	530	0	530	0	525	0	0	528.357	0.62553
5.213	0	525	0	527	0	530	0	530	0	530	0	530	0	530	0	530	0	530	0	525	0	525	0	530	0	530	0	525	0	0	528.357	0.62553
5.2239	0	525	0	527	0	530	0	530	0	530	0	530	0	530	0	530	0	530	0	525	0	525	0	530	0	530	0	525	0	0	528.357	0.62553
5.2347	0	525	0	527	0	530	0	530	0	530	0	530	0	530	0	530	0	530	0	525	0	525	0	530	0	530	0	525	0	0	528.357	0.62553
5.2456	0	525	0	527	0	530	0	530	0	530	0	530	0	530	0	530	0	530	0	525	0	525	0	530	0	530	0	525	0	0	528.357	0.62553
5.2565	0	525	0	527	0	530	0	530	0	530	0	530	0	530	0	530	0	530	0	525	0	525	0	530	0	530	0	525	0	0	528.357	0.62553
5.2673	0	525	0	527	0	530	0	530	0	530	0	530	0	530	0	530	0	530	0	525	0	525	0	530	0	530	0	525	0	0	528.357	0.62553
5.2782	0	525	0	527	0	530	0	530	0	530	0	530	0	530	0	530	0	530	0	525	0	525	0	530	0	530	0	525	0	0	528.357	0.62553
5.289	0	525	0	527	0	530	0	530	0	530	0	530	0	530	0	530	0	530	0	525	0	525	0	530	0	530	0	525	0	0	528.357	0.62553
5.2999	0	525	0	527	0	530	0	530	0	530	0	530	0	530	0	530	0	530	0	525	0	525	0	530	0	530	0	525	0	0	528.357	0.62553
5.3108	0	525	0	527	0	530	0	530	0	530	0	530	0	530	0	530	0	530	0	525	0	525	0	530	0	530	0	525	0	0	528.357	0.62553
5.3216	0	525	0	527	0	530	0	530	0	530	0	530	0	530	0	530	0	530	0	525	0	525	0	530	0	530	0	525	0	0	528.357	0.62553
5.3325	0	525	0	527	0	530	0	530	0	530	0	530	0	530	0	530	0	530	0	525	0	525	0	530	0	530	0	525	0	0	528.357	0.62553
5.3433	0	525	0	527	0	530	0	530	0	530	0	530	0	530	0	530	0	530	0	525	0	525	0	530	0	530	0	525	0	0	528.357	0.62553
5.3542	0	525	0	527	0	530	0	530	0	530	0	530	0	530	0	530	0	530	0	525	0	525	0	530	0	530	0	525	0	0	528.357	0.62553
5.3651	0	525	0	527	0	530	0	530	0	530	0	530	0	530	0	530	0	530	0	525	0	525	0	530	0	530	0	525	0	0	528.357	0.62553
5.3759	0	525	0	527	0	530	0	530	0	530	0	530	0	530	0	530	0	530	0	525	0	525	0	530	0	530	0	525	0	0	528.357	0.62553
5.3868	0	525	0	527	0	530	0	530	0	530	0	530	0	530	0	530	0	530	0	525	0	525	0	530	0	530	0	525	0	0	528.357	0.62553
5.3976	0	525	0	527	0	530	0	530	0	530	0	530	0	530	0	530	0	530	0	525	0	525	0	530	0	530	0	525	0	0	528.357	0.62553
5.4085	0	525	0	527	0	530	0	530	0	530	0	530	0	530	0	530	0	530	0	525	0	525	0	530	0	530	0	525	0	0	528.357	0.62553
5.4194	0	525	0	527	0	530	0	530	0	530	0	530	0	530	0	530	0	530	0	525	0	525	0	530	0	530	0	525	0	0	528.357	0.62553
5.4302	0	525	0	527	0	530	0	530	0	530	0	530	0	530	0	530	0	530	0	525	0	525	0	530	0	530	0	525	0	0	528.357	0.62553
5.4411	0	525	0	527	0	530	0	530	0	530	0	530	0	530	0	530	0	530	0	525	0	525	0	530	0	530	0	525	0	0	528.357	0.62553
5.4519	0	525	0	527	0	530	0	530	0	530	0	530	0	530	0	530	0	530	0	525	0	525	0	530	0	530	0	525	0	0	528.357	0.62553
5.4628	0	525	0	527	0	530	0	530	0	530	0	530	0	530	0	530	0	530	0	525	0	525	0	530	0	530	0	525	0	0	528.357	0.62553
5.4737	0	525	0	527	0	530	0	530	0	530	0	530	0	530	0	530	0	530	0	525	0	525	0	530	0	530	0	525	0	0	528.357	0.62553
5.4845	0	525	0	527	0	530	0	530	0	530	0	530	0	530	0	530	0	530	0	525	0	525	0	530	0	530	0	525	0	0	528.357	0.62553
5.4954	0	525	0	527	0	530	0	530	0	530	0	530	0	530	0	530	0	530	0	525	0	525	0	530	0	530	0	525	0	0	528.357	0.62553
5.5062	0	525	0	527	0	530	0	530	0	530	0	530	0	530	0	530	0	530	0	525	0	525	0	530	0	530	0	525	0	0	528.357	0.62553
5.5171	0	525	0	527	0	530	0	530	0	530	0	530	0	530	0	530	0	530	0	525	0	525	0	530	0	530	0	525	0	0	528.357	0.62553
5.528	0	525	0	527	0	530	0	530	0	530	0	530	0	530	0	530	0	530	0	525	0	525	0	530	0	530	0	525	0	0	528.357	0.62553
5.5388	0	525	0	527	0	530	0	530	0	530	0	530	0	530	0	530	0	530	0	525	0	525	0	530	0	530	0	525	0	0	528.357	0.62553
5.5497	0	525	0	527	0	530	0	530	0	530	0	530	0	530	0	530	0	530	0	525	0	525	0	530	0	530	0	525	0	0	528.357	0.62553
5.5605	0	525	0	527	0	530	0	530	0	530	0	530	0	530	0	530	0	530	0	525	0	525	0	530	0	530	0	525	0	0	528.357	0.62553
5.5714	0	525	0	527	0	530	0	530	0	530	0	530	0	530	0	530	0	530	0	525	0	525	0	530	0	530	0	525	0	0	528.357	0.62553
5.5823	0	525	0	527	0	530	0	530	0	530	0	530	0	530	0	530	0	530	0	525	0	525	0	530	0	530	0	525	0	0	528.357	0.62553
5.5931	0	525	0	527	0	530	0	530	0	530	0	530	0	530	0	530	0	530	0	525	0	525	0	530	0	530	0	525	0	0	528.357	0.62553
5.604	0	525	0	527	0	530	0	530	0	530	0	530	0	530	0	530	0	530	0	525	0	525	0	530	0	530	0	525	0	0	528.357	0.62553
5.6148	0	525	0	527	0	530	0	530	0	530	0	530	0	530	0	530	0	530	0	525	0	525	0	530	0	530	0	525	0	0	528.357	0.62553
5.6257	0	525	0	527	0	530	0	530	0	530	0	530	0	530	0	530	0	530	0	525	0	525	0	530	0	530	0	525	0	0	528.357	0.62553
5.6366	0	525	0	527	0	530	0	530	0	530	0	530	0	530	0	530	0	530	0	525	0	525	0	530	0	530	0	525	0	0	528.357	0.62553
5.6474	0	525	0	527	0	530	0	530	0	530	0	530	0	530	0	530	0	530	0	525	0	525	0	530	0	530	0	525	0	0	528.357	0.62553
5.6583	0	525	0	527	0	530	0	530	0	530	0	530	0	530	0	530	0	530	0	525	0	525	0	530	0	530	0	525	0	0	528.357	0.62553
5.6691	0	525	0	527	0	530	0	530	0	530	0	530	0	530	0	530	0	530	0	525	0	525	0	530	0	530	0	525	0	0	528.357	0.62553
5.68	0	525	0	527	0	530	0	530	0	530	0	530	0	530	0	530	0	530	0	525	0	525	0	530	0	530	0	525	0	0	528.357	0.62553
5.6909	0	525	0	527	0	530	0	530	0	530	0	530	0	530	0	530	0	530	0	525	0	525	0	530	0	530	0	525	0	0	528.357	0.62553
5.7017	0	525	0	527	0	530	0	530	0	530	0	530	0	530	0	530	0	530	0	525	0	525	0	530	0	530	0	525	0	0	528.357	0.62553
5.7126	0	525	0	527	0	530	0	530	0	530	0	530	0	530	0	530	0	530	0	525	0	525	0	530	0	530	0	525	0	0	528.357	0.62553
5.7234	0	525	0	527	0	530	0	530	0	530	0	530	0	530	0	530	0	530	0	525	0	525	0	530	0	530	0	525	0	0	528.357	0.62553
5.7343	0	525	0	527	0	530	0	530	0	530	0	530	0	530	0	530	0	530	0	525	0	525	0	530	0	530	0	525	0	0	528.357	0.62553
5.7452	0	525	0	527	0	530	0	530	0	530	0	530	0	530	0	530	0	530	0	525	0	525	0	530	0	530	0	525	0	0	528.357	0.62553
5.756	0	525	0	527	0	530	0	530	0	530	0	530	0	530	0	530	0	530	0	525	0	525	0	530	0	530	0	525	0	0	528.357	0.62553
5.7669	0	525	0	527	0	530	0	530	0	530	0	530	0	530	0	530	0	530	0	525	0	525	0	530	0	530	0	525	0	0	528.357	0.62553
5.7778	0	525	0	527	0	530	0	530	0	530	0	530	0	530	0	530	0	530	0	525	0	525	0	530	0	530	0	525	0	0	528.357	0.62553
5.7886	0	525	0	527	0	530	0	530	0	530	0	530	0	530	0	530	0	530	0	525	0	525	0	530	0	530	0	525	0	0	528.357	0.62553
5.7995	0	525	0	527	0	530	0	530	0	530	0	530	0	530	0	530	0	530	0	525	0	525	0	530	0	530	0	525	0	0	528.357	0.62553
5.8103	0	525	0	527	0	530	0	530	0	530	0	530	0	530	0	530	0	530	0	525	0	525	0	530	0	530	0	525	0	0	528.357	0.62553
5.8212	0	525	0	527	0	530	0	530	0	530	0	530	0	530	0	530	0	530	0	525	0	525	0	530	0	530	0	525	0	0	528.357	0.62553
5.8321	0	525	0	527	0	530	0	530	0	530	0	530	0	530	0	530	0	530	0	525	0	525	0	530	0	530	0	525	0	0	528.357	0.62553
5.8429	0	525	0	527	0	530	0	530	0	530	0	530	0	530	0	530	0	530	0	525	0	525	0	530	0	530	0	525	0	0	528.357	0.62553
5.8538	0	525	0	527	0	530	0	530	0	530	0	530	0	530	0	530	0	530	0	525	0	525	0	530	0	530	0	525	0	0	528.357	0.62553
5.8646	0	525	0	527	0	530	0	530	0	530	0	530	0	530	0	530	0	530	0	525	0	525	0	530	0	530	0	525	0	0	528.357	0.62553
5.8755	0	525	0	527	0	530	0	530	0	530	0	530	0	530	0	530	0	530	0	525	0	525	0	530	0	530	0	525	0	0	528.357	0.62553
5.8864	0	525	0	527	0	530	0	530	0	530	0	530	0	530	0	530	0	530	0	525	0	525	0	530	0	530	0	525	0	0	528.357	0.62553
5.8972	0	525	0	527	0	530	0	530	0	530	0	530	0	530	0	530	0	530	0	525	0	525	0	530	0	530	0	525	0	0	528.357	0.62553
5.9081	0	525	0	527	0	530	0	530	0	530	0	530	0	530	0	530	0	530	0	525	0	525	0	530	0	530	0	525	0	0	528.357	0.62553
5.9189	0	525	0	527	0	530	0	530	0	530	0	530	0	530	0	530	0	530	0	525	0	525	0	530	0	530	0	525	0	0	528.357	0.62553
5.9298	0	525	0	527	0	530	0	530	0	530	0	530	0	530	0	530	0	530	0	525	0	525	0	530	0	530	0	525	0	0	528.357	0.62553
5.9407	0	525	0	527	0	530	0	530	0	530	0	530	0	530	0	530	0	530	0	525	0	525	0	530	0	530	0	525	0	0	528.357	0.62553
5.9515	0	525	0	527	0	530	0	530	0	530	0	530	0	530	0	530	0	530	0	525	0	525	0	530	0	530	0	525	0	0	528.357	0.62553
5.9624	0	525	0	527	0	530	0	530	0	530	0	530	0	530	0	530	0	530	0	525	0	525	0	530	0	530	0	525	0	0	528.357	0.62553
5.9732	0	525	0	527	0	530	0	530	0	530	0	530	0	530	0	530	0	530	0	525	0	525	0	530	0	530	0	525	0	0	528.357	0.62553
5.9841	0	525	0	527	0	530	0	530	0	530	0	530	0	530	0	530	0	530	0	525	0	525	0	530	0	530	0	525	0	0	528.357	0.62553
5.995	0	525	0	527	0	530	0	530	0	530	0	530	0	530	0	530	0	530	0	525	0	525	0	530	0	530	0	525	0	0	528.357	0.62553
6.0058	0	525	0	527	0	530	0	530	0	530	0	530	0	530	0	530	0	530	0	525	0	525	0	530	0	530	0	525	0	0	528.357	0.62553
6.0167	0	525	0	527	0	530	0	530	0	530	0	530	0	530	0	530	0	530	0	525	0	525	0	530	0	530	0	525	0	0	528.357	0.62553
6.0275	0	525	0	527	0	530	0	530	0	530	0	530	0	530	0	530	0	530	0	525	0	525	0	530	0	530	0	525	0	0	528.357	0.62553
6.0384	0	525	0	527	0	530	0	530	0	530	0	530	0	530	0	530	0	530	0	525	0	525	0	530	0	530	0	525	0	0	528.357	0.62553
6.0493	0	525	0	527	0	530	0	530	0	530	0	530	0	530	0	530	0	530	0	525	0	525	0	530	0	530	0	525	0	0	528.357	0.62553
6.0601	0	525	0	527	0	530	0	530	0	530	0	530	0	530	0	530	0	530	0	525	0	525	0	530	0	530	0	525	0	0	528.357	0.62553
6.071	0	525	0	527	0	530	0	530	0	530	0	530	0	530	0	530	0	530	0	525	0	525	0	530	0	530	0	525	0	0	528.357	0.62553
6.0818	0	525	0	527	0	530	0	530	0	530	0	530	0	530	0	530	0	530	0	525	0	525	0	530	0	530	0	525	0	0	528.357	0.62553
6.0927	0	525	0	527	0	530	0	530	0	530	0	530	0	530	0	530	0	530	0	525	0	525	0	530	0	530	0	525	0	0	528.357	0.62553
6.1036	0	525	0	527	0	530	0	530	0	530	0	530	0	530	0	530	0	530	0	525	0	525	0	530	0	530	0	525	0	0	528.357	0.62553
6.1144	0	525	0	527	0	530	0	530	0	530	0	530	0	530	0	530	0	530	0	525	0	525	0	530	0	530	0	525	0	0	528.357	0.62553
6.1253	0	525	0	527	0	530	0	530	0	530	0	530	0	530	0	530	0	530	0	525	0	525	0	530	0	530	0	525	0	0	528.357	0.62553
6.1361	0	525	0	527	0	530	0	530	0	530	0	530	0	530	0	530	0	530	0	525	0	525	0	530	0	530	0	525	0	0	528.357	0.62553
6.147	0	525	0	527	0	530	0	530	0	530	0	530	0	530	0	530	0	530	0	525	0	525	0	530	0	530	0	525	0	0	528.357	0.62553
6.1579	0	525	0	527	0	530	0	530	0	530	0	530	0	530	0	530	0	530	0	525	0	525	0	530	0	530	0	525	0	0	528.357	0.62553
6.1687	0	525	0	527	0	530	0	530	0	530	0	530	0	530	0	530	0	530	0	525	0	525	0	530	0	530	0	525	0	0	528.357	0.62553
6.1796	0	525	0	527	0	530	0	530	0	530	0	530	0	530	0	530	0	530	0	525	0	525	0	530	0	530	0	525	0	0	528.357	0.62553
6.1904	0	525	0	527	0	530	0	530	0	530	0	530	0	530	0	530	0	530	0	525	0	525	0	530	0	530	0	525	0	0	528.357	0.62553
6.2013	0	525	0	527	0	530	0	530	0	530	0	530	0	530	0	530	0	530	0	525	0	525	0	530	0	530	0	525	0	0	528.357	0.62553
6.2122	0	525	0	527	0	530	0	530	0	530	0	530	0	530	0	530	0	530	0	525	0	525	0	530	0	530	0	525	0	0	528.357	0.62553
6.223	0	525	0	527	0	530	0	530	0	530	0	530	0	530	0	530	0	530	0	525	0	525	0	530	0	530	0	525	0	0	528.357	0.62553
6.2339	0	525	0	527	0	530	0	530	0	530	0	530	0	530	0	530	0	530	0	525	0	525	0	530	0	530	0	525	0	0	528.357	0.62553
6.2448	0	525	0	527	0	530	0	530	0	530	0	530	0	530	0	530	0	530	0	525	0	525	0	530	0	530	0	525	0	0	528.357	0.62553
6.2556	0	525	0	527	0	530	0	530	0	530	0	530	0	530	0	530	0	530	0	525	0	525	0	530	0	530	0	525	0	0	528.357	0.62553
6.2665	0	525	0	527	0	530	0	530	0	530	0	530	0	530	0	530	0	530	0	525	0	525	0	530	0	530	0	525	0	0	528.357	0.62553
6.2773	0	525	0	527	0	530	0	530	0	530	0	530	0	530	0	530	0	530	0	525	0	525	0	530	0	530	0	525	0	0	528.357	0.62553
6.2882	0	525	0	527	0	530	0	530	0	530	0	530	0	530	0	530	0	530	0	525	0	525	0	530	0	530	0	525	0	0	528.357	0.62553
6.2991	0	525	0	527	0	530	0	530	0	530	0	530	0	530	0	530	0	530	0	525	0	525	0	530	0	530	0	525	0	0	528.357	0.62553
6.3099	0	525	0	527	0	530	0	530	0	530	0	530	0	530	0	530	0	530	0	525	0	525	0	530	0	530	0	525	0	0	528.357	0.62553
6.3208	0	525	0	527	0	530	0	530	0	530	0	530	0	530	0	530	0	530	0	525	0	525	0	530	0	530	0	525	0	0	528.357	0.62553
6.3316	0	525	0	527	0	530	0	530	0	530	0	530	0	530	0	530	0	530	0	525	0	525	0	530	0	530	0	525	0	0	528.357	0.62553
6.3425	0	525	0	527	0	530	0	530	0	530	0	530	0	530	0	530	0	530	0	525	0	525	0	530	0	530	0	525	0	0	528.357	0.62553
6.3534	0	525	0	527	0	530	0	530	0	530	0	530	0	530	0	530	0	530	0	525	0	525	0	530	0	530	0	525	0	0	528.357	0.62553
6.3642	0	525	0	527	0	530	0	530	0	530	0	530	0	530	0	530	0	530	0	525	0	525	0	530	0	530	0	525	0	0	528.357	0.62553
6.3751	0	525	0	527	0	530	0	530	0	530	0	530	0	530	0	530	0	530	0	525	0	525	0	530	0	530	0	525	0	0	528.357	0.62553
6.3859	0	525	0	527	0	530	0	530	0	530	0	530	0	530	0	530	0	530	0	525	0	525	0	530	0	530	0	525	0	0	528.357	0.62553
6.3968	0	525	0	527	0	530	0	530	0	530	0	530	0	530	0	530	0	530	0	525	0	525	0	530	0	530	0	525	0	0	528.357	0.62553
6.4077	0	525	0	527	0	530	0	530	0	530	0	530	0	530	0	530	0	530	0	525	0	525	0	530	0	530	0	525	0	0	528.357	0.62553
6.4185	0	525	0	527	0	530	0	530	0	530	0	530	0	530	0	530	0	530	0	525	0	525	0	530	0	530	0	525	0	0	528.357	0.62553
6.4294	0	525	0	527	0	530	0	530	0	530	0	530	0	530	0	530	0	530	0	525	0	525	0	530	0	530	0	525	0	0	528.357	0.62553
6.4402	0	525	0	527	0	530	0	530	0	530	0	530	0	530	0	530	0	530	0	525	0	525	0	530	0	530	0	525	0	0	528.357	0.62553
6.4511	0	525	0	527	0	530	0	530	0	530	0	530	0	530	0	530	0	530	0	525	0	525	0	530	0	530	0	525	0	0	528.357	0.62553
6.462	0	525	0	527	0	530	0	530	0	530	0	530	0	530	0	530	0	530	0	525	0	525	0	530	0	530	0	525	0	0	528.357	0.62553
6.4728	0	525	0	527	0	530	0	530	0	530	0	530	0	530	0	530	0	530	0	525	0	525	0	530	0	530	0	525	0	0	528.357	0.62553
6.4837	0	525	0	527	0	530	0	530	0	530	0	530	0	530	0	530	0	530	0	525	0	525	0	530	0	530	0	525	0	0	528.357	0.62553
6.4945	0	525	0	527	0	530	0	530	0	530	0	530	0	530	0	530	0	530	0	525	0	525	0	530	0	530	0	525	0	0	528.357	0.62553
6.5054	0	525	0	527	0	530	0	530	0	530	0	530	0	530	0	530	0	530	0	525	0	525	0	530	0	530	0	525	0	0	528.357	0.62553
6.5163	0	525	0	527	0	530	0	530	0	530	0	530	0	530	0	530	0	530	0	525	0	525	0	530	0	530	0	525	0	0	528.357	0.62553
6.5271	0	525	0	527	0	530	0	530	0	530	0	530	0	530	0	530	0	530	0	525	0	525	0	530	0	530	0	525	0	0	528.357	0.62553
6.538	0	525	0	527	0	530	0	530	0	530	0	530	0	530	0	530	0	530	0	525	0	525	0	530	0	530	0	525	0	0	528.357	0.62553
6.5488	0	525	0	527	0	530	0	530	0	530	0	530	0	530	0	530	0	530	0	525	0	525	0	530	0	530	0	525	0	0	528.357	0.62553
6.5597	0	525	0	527	0	530	0	530	0	530	0	530	0	530	0	530	0	530	0	525	0	525	0	530	0	530	0	525	0	0	528.357	0.62553
6.5706	0	525	0	527	0	530	0	530	0	530	0	530	0	530	0	530	0	530	0	525	0	525	0	530	0	530	0	525	0	0	528.357	0.62553
6.5814	0	525	0	527	0	530	0	530	0	530	0	530	0	530	0	530	0	530	0	525	0	525	0	530	0	530	0	525	0	0	528.357	0.62553
6.5923	0	525	0	527	0	530	0	530	0	530	0	530	0	530	0	530	0	530	0	525	0	525	0	530	0	530	0	525	0	0	528.357	0.62553
6.6031	0	525	0	527	0	530	0	530	0	530	0	530	0	530	0	530	0	530	0	525	0	525	0	530	0	530	0	525	0	0	528.357	0.62553
6.614	0	525	0	527	0	530	0	530	0	530	0	530	0	530	0	530	0	530	0	525	0	525	0	530	0	530	0	525	0	0	528.357	0.62553
6.6249	0	525	0	527	0	530	0	530	0	530	0	530	0	530	0	530	0	530	0	525	0	525	0	530	0	530	0	525	0	0	528.357	0.62553
6.6357	0	525	0	527	0	530	0	530	0	530	0	530	0	530	0	530	0	530	0	525	0	525	0	530	0	530	0	525	0	0	528.357	0.62553
6.6466	0	525	0	527	0	530	0	530	0	530	0	530	0	530	0	530	0	530	0	525	0	525	0	530	0	530	0	525	0	0	528.357	0.62553
6.6574	0	525	0	527	0	530	0	530	0	530	0	530	0	530	0	530	0	530	0	525	0	525	0	530	0	530	0	525	0	0	528.357	0.62553
6.6683	0	525	0	527	0	530	0	530	0	530	0	530	0	530	0	530	0	530	0	525	0	525	0	530	0	530	0	525	0	0	528.357	0.62553
6.6792	0	525	0	527	0	530	0	530	0	530	0	530	0	530	0	530	0	530	0	525	0	525	0	530	0	530	0	525	0	0	528.357	0.62553
6.69	0	525	0	527	0	530	0	530	0	530	0	530	0	530	0	530	0	530	0	525	0	525	0	530	0	530	0	525	0	0	528.357	0.62553
6.7009	0	525	0	527	0	530	0	530	0	530	0	530	0	530	0	530	0	530	0	525	0	525	0	530	0	530	0	525	0	0	528.357	0.62553
6.7117	0	525	0	527	0	530	0	530	0	530	0	530	0	530	0	530	0	530	0	525	0	525	0	530	0	530	0	525	0	0	528.357	0.62553
6.7226	0	525	0	527	0	530	0	530	0	530	0	530	0	530	0	530	0	530	0	525	0	525	0	530	0	530	0	525	0	0	528.357	0.62553
6.7335	0	525	0	527	0	530	0	530	0	530	0	530	0	530	0	530	0	530	0	525	0	525	0	530	0	530	0	525	0	0	528.357	0.62553
6.7443	0	525	0	527	0	530	0	530	0	530	0	530	0	530	0	530	0	530	0	525	0	525	0	530	0	530	0	525	0	0	528.357	0.62553
6.7552	0	525	0	527	0	530	0	530	0	530	0	530	0	530	0	530	0	530	0	525	0	525	0	530	0	530	0	525	0	0	528.357	0.62553
6.7661	0	525	0	527	0	530	0	530	0	530	0	530	0	530	0	530	0	530	0	525	0	525	0	530	0	530	0	525	0	0	528.357	0.62553
6.7769	0	525	0	527	0	530	0	530	0	530	0	530	0	530	0	530	0	530	0	525	0	525	0	530	0	530	0	525	0	0	528.357	0.62553
6.7878	0	525	0	527	0	530	0	530	0	530	0	530	0	530	0	530	0	530	0	525	0	525	0	530	0	530	0	525	0	0	528.357	0.62553
6.7986	0	525	0	527	0	530	0	530	0	530	0	530	0	530	0	530	0	530	0	525	0	525	0	530	0	530	0	525	0	0	528.357	0.62553
6.8095	0	525	0	527	0	530	0	530	0	530	0	530	0	530	0	530	0	530	0	525	0	525	0	530	0	530	0	525	0	0	528.357	0.62553
6.8204	0	525	0	527	0	530	0	530	0	530	0	530	0	530	0	530	0	530	0	525	0	525	0	530	0	530	0	525	0	0	528.357	0.62553
6.8312	0	525	0	527	0	530	0	530	0	530	0	530	0	530	0	530	0	530	0	525	0	525	0	530	0	530	0	525	0	0	528.357	0.62553
6.8421	0	525	0	527	0	530	0	530	0	530	0	530	0	530	0	530	0	530	0	525	0	525	0	530	0	530	0	525	0	0	528.357	0.62553
6.8529	0	525	0	527	0	530	0	530	0	530	0	530	0	530	0	530	0	530	0	525	0	525	0	530	0	530	0	525	0	0	528.357	0.62553
6.8638	0	525	0	527	0	530	0	530	0	530	0	530	0	530	0	530	0	530	0	525	0	525	0	530	0	530	0	525	0	0	528.357	0.62553
6.8747	0	525	0	527	0	530	0	530	0	530	0	530	0	530	0	530	0	530	0	525	0	525	0	530	0	530	0	525	0	0	528.357	0.62553
6.8855	0	525	0	527	0	530	0	530	0	530	0	530	0	530	0	530	0	530	0	525	0	525	0	530	0	530	0	525	0	0	528.357	0.62553
6.8964	0	525	0	527	0	530	0	530	0	530	0	530	0	530	0	530	0	530	0	525	0	525	0	530	0	530	0	525	0	0	528.357	0.62553
6.9072	0	525	0	527	0	530	0	530	0	530	0	530	0	530	0	530	0	530	0	525	0	525	0	530	0	530	0	525	0	0	528.357	0.62553
6.9181	0	525	0	527	0	530	0	530	0	530	0	530	0	530	0	530	0	530	0	525	0	525	0	530	0	530	0	525	0	0	528.357	0.62553
6.929	0	525	0	527	0	530	0	530	0	530	0	530	0	530	0	530	0	530	0	525	0	525	0	530	0	530	0	525	0	0	528.357	0.62553
6.9398	0	525	0	527	0	530	0	530	0	530	0	530	0	530	0	530	0	530	0	525	0	525	0	530	0	530	0	525	0	0	528.357	0.62553
6.9507	0	525	0	527	0	530	0	530	0	530	0	530	0	530	0	530	0	530	0	525	0	525	0	530	0	530	0	525	0	0	528.357	0.62553
6.9615	0	525	0	527	0	530	0	530	0	530	0	530	0	530	0	530	0	530	0	525	0	525	0	530	0	530	0	525	0	0	528.357	0.62553
6.9724	0	525	0	527	0	530	0	530	0	530	0	530	0	530	0	530	0	530	0	525	0	525	0	530	0	530	0	525	0	0	528.357	0.62553
6.9833	0	525	0	527	0	530	0	530	0	530	0	530	0	530	0	530	0	530	0	525	0	525	0	530	0	530	0	525	0	0	528.357	0.62553
6.9941	0	525	0	527	0	530	0	530	0	530	0	530	0	530	0	530	0	530	0	525	0	525	0	530	0	530	0	525	0	0	528.357	0.62553
7.005	0	525	0	527	0	530	0	530	0	530	0	530	0	530	0	530	0	530	0	525	0	525	0	530	0	530	0	525	0	0	528.357	0.62553
7.0158	0	525	0	527	0	530	0	530	0	530	0	530	0	530	0	530	0	530	0	525	0	525	0	530	0	530	0	525	0	0	528.357	0.62553
7.0267	0	525	0	527	0	530	0	530	0	530	0	530	0	530	0	530	0	530	0	525	0	525	0	530	0	530	0	525	0	0	528.357	0.62553
7.0376	0	525	0	527	0	530	0	530	0	530	0	530	0	530	0	530	0	530	0	525	0	525	0	530	0	530	0	525	0	0	528.357	0.62553
7.0484	0	525	0	527	0	530	0	530	0	530	0	530	0	530	0	530	0	530	0	525	0	525	0	530	0	530	0	525	0	0	528.357	0.62553
7.0593	0	525	0	527	0	530	0	530	0	530	0	530	0	530	0	530	0	530	0	525	0	525	0	530	0	530	0	525	0	0	528.357	0.62553
7.0701	0	525	0	527	0	530	0	530	0	530	0	530	0	530	0	530	0	530	0	525	0	525	0	530	0	530	0	525	0	0	528.357	0.62553
7.081	0	525	0	527	0	530	0	530	0	530	0	530	0	530	0	530	0	530	0	525	0	525	0	530	0	530	0	525	0	0	528.357	0.62553
7.0919	0	525	0	527	0	530	0	530	0	530	0	530	0	530	0	530	0	530	0	525	0	525	0	530	0	530	0	525	0	0	528.357	0.62553
7.1027	0	525	0	527	0	530	0	530	0	530	0	530	0	530	0	530	0	530	0	525	0	525	0	530	0	530	0	525	0	0	528.357	0.62553
7.1136	0	525	0	527	0	530	0	530	0	530	0	530	0	530	0	530	0	530	0	525	0	525	0	530	0	530	0	525	0	0	528.357	0.62553
7.1244	0	525	0	527	0	530	0	530	0	530	0	530	0	530	0	530	0	530	0	525	0	525	0	530	0	530	0	525	0	0	528.357	0.62553
7.1353	0	525	0	527	0	530	0	530	0	530	0	530	0	530	0	530	0	530	0	525	0	525	0	530	0	530	0	525	0	0	528.357	0.62553
7.1462	0	525	0	527	0	530	0	530	0	530	0	530	0	530	0	530	0	530	0	525	0	525	0	530	0	530	0	525	0	0	528.357	0.62553
7.157	0	525	0	527	0	530	0	530	0	530	0	530	0	530	0	530	0	530	0	525	0	525	0	530	0	530	0	525	0	0	528.357	0.62553
7.1679	0	525	0	527	0	530	0	530	0	530	0	530	0	530	0	530	0	530	0	525	0	525	0	530	0	530	0	525	0	0	528.357	0.62553
7.1787	0	525	0	527	0	530	0	530	0	530	0	530	0	530	0	530	0	530	0	525	0	525	0	530	0	530	0	525	0	0	528.357	0.62553
7.1896	0	525	0	527	0	530	0	530	0	530	0	530	0	530	0	530	0	530	0	525	0	525	0	530	0	530	0	525	0	0	528.357	0.62553
7.2005	0	525	0	527	0	530	0	530	0	530	0	530	0	530	0	530	0	530	0	525	0	525	0	530	0	530	0	525	0	0	528.357	0.62553
7.2113	0	525	0	527	0	530	0	530	0	530	0	530	0	530	0	530	0	530	0	525	0	525	0	530	0	530	0	525	0	0	528.357	0.62553
7.2222	0	525	0	527	0	530	0	530	0	530	0	530	0	530	0	530	0	530	0	525	0	525	0	530	0	530	0	525	0	0	528.357	0.62553
7.2331	0	525	0	527	0	530	0	530	0	530	0	530	0	530	0	530	0	530	0	525	0	525	0	530	0	530	0	525	0	0	528.357	0.62553
7.2439	0	525	0	527	0	530	0	530	0	530	0	530	0	530	0	530	0	530	0	525	0	525	0	530	0	530	0	525	0	0	528.357	0.62553
7.2548	0	525	0	527	0	530	0	530	0	530	0	530	0	530	0	530	0	530	0	525	0	525	0	530	0	530	0	525	0	0	528.357	0.62553
7.2656	0	525	0	527	0	530	0	530	0	530	0	530	0	530	0	530	0	530	0	525	0	525	0	530	0	530	0	525	0	0	528.357	0.62553
7.2765	0	525	0	527	0	530	0	530	0	530	0	530	0	530	0	530	0	530	0	525	0	525	0	530	0	530	0	525	0	0	528.357	0.62553
7.2874	0	525	0	527	0	530	0	530	0	530	0	530	0	530	0	530	0	530	0	525	0	525	0	530	0	530	0	525	0	0	528.357	0.62553
7.2982	0	525	0	527	0	530	0	530	0	530	0	530	0	530	0	530	0	530	0	525	0	525	0	530	0	530	0	525	0	0	528.357	0.62553
7.3091	0	525	0	527	0	530	0	530	0	530	0	530	0	530	0	530	0	530	0	525	0	525	0	530	0	530	0	525	0	0	528.357	0.62553
7.3199	0	525	0	527	0	530	0	530	0	530	0	530	0	530	0	530	0	530	0	525	0	525	0	530	0	530	0	525	0	0	528.357	0.62553
7.3308	0	525	0	527	0	530	0	530	0	530	0	530	0	530	0	530	0	530	0	525	0	525	0	530	0	530	0	525	0	0	528.357	0.62553
7.3417	0	525	0	527	0	530	0	530	0	530	0	530	0	530	0	530	0	530	0	525	0	525	0	530	0	530	0	525	0	0	528.357	0.62553
7.3525	0	525	0	527	0	530	0	530	0	530	0	530	0	530	0	530	0	530	0	525	0	525	0	530	0	530	0	525	0	0	528.357	0.62553
7.3634	0	525	0	527	0	530	0	530	0	530	0	530	0	530	0	530	0	530	0	525	0	525	0	530	0	530	0	525	0	0	528.357	0.62553
7.3742	0	525	0	527	0	530	0	530	0	530	0	530	0	530	0	530	0	530	0	525	0	525	0	530	0	530	0	525	0	0	528.357	0.62553
7.3851	0	525	0	527	0	530	0	530	0	530	0	530	0	530	0	530	0	530	0	525	0	525	0	530	0	530	0	525	0	0	528.357	0.62553
7.396	0	525	0	527	0	530	0	530	0	530	0	530	0	530	0	530	0	530	0	525	0	525	0	530	0	530	0	525	0	0	528.357	0.62553
7.4068	0	525	0	527	0	530	0	530	0	530	0	530	0	530	0	530	0	530	0	525	0	525	0	530	0	530	0	525	0	0	528.357	0.62553
7.4177	0	525	0	527	0	530	0	530	0	530	0	530	0	530	0	530	0	530	0	525	0	525	0	530	0	530	0	525	0	0	528.357	0.62553
7.4285	0	525	0	527	0	530	0	530	0	530	0	530	0	530	0	530	0	530	0	525	0	525	0	530	0	530	0	525	0	0	528.357	0.62553
7.4394	0	525	0	527	0	530	0	530	0	530	0	530	0	530	0	530	0	530	0	525	0	525	0	530	0	530	0	525	0	0	528.357	0.62553
7.4503	0	525	0	527	0	530	0	530	0	530	0	530	0	530	0	530	0	530	0	525	0	525	0	530	0	530	0	525	0	0	528.357	0.62553
7.4611	0	525	0	527	0	530	0	530	0	530	0	530	0	530	0	530	0	530	0	525	0	525	0	530	0	530	0	525	0	0	528.357	0.62553
7.472	0	525	0	527	0	530	0	530	0	530	0	530	0	530	0	530	0	530	0	525	0	525	0	530	0	530	0	525	0	0	528.357	0.62553
7.4828	0	525	0	527	0	530	0	530	0	530	0	530	0	530	0	530	0	530	0	525	0	525	0	530	0	530	0	525	0	0	528.357	0.62553
7.4937	0	525	0	527	0	530	0	530	0	530	0	530	0	530	0	530	0	530	0	525	0	525	0	530	0	530	0	525	0	0	528.357	0.62553
7.5046	0	525	0	527	0	530	0	530	0	530	0	530	0	530	0	530	0	530	0	525	0	525	0	530	0	530	0	525	0	0	528.357	0.62553
7.5154	0	525	0	527	0	530	0	530	0	530	0	530	0	530	0	530	0	530	0	525	0	525	0	530	0	530	0	525	0	0	528.357	0.62553
7.5263	0	525	0	527	0	530	0	530	0	530	0	530	0	530	0	530	0	530	0	525	0	525	0	530	0	530	0	525	0	0	528.357	0.62553
7.5371	0	525	0	527	0	530	0	530	0	530	0	530	0	530	0	530	0	530	0	525	0	525	0	530	0	530	0	525	0	0	528.357	0.62553
7.548	0	525	0	527	0	530	0	530	0	530	0	530	0	530	0	530	0	530	0	525	0	525	0	530	0	530	0	525	0	0	528.357	0.62553
7.5589	0	525	0	527	0	530	0	530	0	530	0	530	0	530	0	530	0	530	0	525	0	525	0	530	0	530	0	525	0	0	528.357	0.62553
7.5697	0	525	0	527	0	530	0	530	0	530	0	530	0	530	0	530	0	530	0	525	0	525	0	530	0	530	0	525	0	0	528.357	0.62553
7.5806	0	525	0	527	0	530	0	530	0	530	0	530	0	530	0	530	0	530	0	525	0	525	0	530	0	530	0	525	0	0	528.357	0.62553
7.5914	0	525	0	527	0	530	0	530	0	530	0	530	0	530	0	530	0	530	0	525	0	525	0	530	0	530	0	525	0	0	528.357	0.62553
7.6023	0	525	0	527	0	530	0	530	0	530	0	530	0	530	0	530	0	530	0	525	0	525	0	530	0	530	0	525	0	0	528.357	0.62553
7.6132	0	525	0	527	0	530	0	530	0	530	0	530	0	530	0	530	0	530	0	525	0	525	0	530	0	530	0	525	0	0	528.357	0.62553
7.624	0	525	0	527	0	530	0	530	0	530	0	530	0	530	0	530	0	530	0	525	0	525	0	530	0	530	0	525	0	0	528.357	0.62553
7.6349	0	525	0	527	0	530	0	530	0	530	0	530	0	530	0	530	0	530	0	525	0	525	0	530	0	530	0	525	0	0	528.357	0.62553
7.6457	0	525	0	527	0	530	0	530	0	530	0	530	0	530	0	530	0	530	0	525	0	525	0	530	0	530	0	525	0	0	528.357	0.62553
7.6566	0	525	0	527	0	530	0	530	0	530	0	530	0	530	0	530	0	530	0	525	0	525	0	530	0	530	0	525	0	0	528.357	0.62553
7.6675	0	525	0	527	0	530	0	530	0	530	0	530	0	530	0	530	0	530	0	525	0	525	0	530	0	530	0	525	0	0	528.357	0.62553
7.6783	0	525	0	527	0	530	0	530	0	530	0	530	0	530	0	530	0	530	0	525	0	525	0	530	0	530	0	525	0	0	528.357	0.62553
7.6892	0	525	0	527	0	530	0	530	0	530	0	530	0	530	0	530	0	530	0	525	0	525	0	530	0	530	0	525	0	0	528.357	0.62553
7.7	0	525	0	527	0	530	0	530	0	530	0	530	0	530	0	530	0	530	0	525	0	525	0	530	0	530	0	525	0	0	528.357	0.62553
7.7109	0	525	0	527	0	530	0	530	0	530	0	530	0	530	0	530	0	530	0	525	0	525	0	530	0	530	0	525	0	0	528.357	0.62553
7.7218	0	525	0	527	0	530	0	530	0	530	0	530	0	530	0	530	0	530	0	525	0	525	0	530	0	530	0	525	0	0	528.357	0.62553
7.7326	0	525	0	527	0	530	0	530	0	530	0	530	0	530	0	530	0	530	0	525	0	525	0	530	0	530	0	525	0	0	528.357	0.62553
7.7435	0	525	0	527	0	530	0	530	0	530	0	530	0	530	0	530	0	530	0	525	0	525	0	530	0	530	0	525	0	0	528.357	0.62553
7.7544	0	525	0	527	0	530	0	530	0	530	0	530	0	530	0	530	0	530	0	525	0	525	0	530	0	530	0	525	0	0	528.357	0.62553
7.7652	0	525	0	527	0	530	0	530	0	530	0	530	0	530	0	530	0	530	0	525	0	525	0	530	0	530	0	525	0	0	528.357	0.62553
7.7761	0	525	0	527	0	530	0	530	0	530	0	530	0	530	0	530	0	530	0	525	0	525	0	530	0	530	0	525	0	0	528.357	0.62553
7.7869	0	525	0	527	0	530	0	530	0	530	0	530	0	530	0	530	0	530	0	525	0	525	0	530	0	530	0	525	0	0	528.357	0.62553
7.7978	0	525	0	527	0	530	0	530	0	530	0	530	0	530	0	530	0	530	0	525	0	525	0	530	0	530	0	525	0	0	528.357	0.62553
7.8087	0	525	0	527	0	530	0	530	0	530	0	530	0	530	0	530	0	530	0	525	0	525	0	530	0	530	0	525	0	0	528.357	0.62553
7.8195	0	525	0	527	0	530	0	530	0	530	0	530	0	530	0	530	0	530	0	525	0	525	0	530	0	530	0	525	0	0	528.357	0.62553
7.8304	0	525	0	527	0	530	0	530	0	530	0	530	0	530	0	530	0	530	0	525	0	525	0	530	0	530	0	525	0	0	528.357	0.62553
7.8412	0	525	0	527	0	530	0	530	0	530	0	530	0	530	0	530	0	530	0	525	0	525	0	530	0	530	0	525	0	0	528.357	0.62553
7.8521	0	525	0	527	0	530	0	530	0	530	0	530	0	530	0	530	0	530	0	525	0	525	0	530	0	530	0	525	0	0	528.357	0.62553
7.863	0	525	0	527	0	530	0	530	0	530	0	530	0	530	0	530	0	530	0	525	0	525	0	530	0	530	0	525	0	0	528.357	0.62553
7.8738	0	525	0	527	0	530	0	530	0	530	0	530	0	530	0	530	0	530	0	525	0	525	0	530	0	530	0	525	0	0	528.357	0.62553
7.8847	0	525	0	527	0	530	0	530	0	530	0	530	0	530	0	530	0	530	0	525	0	525	0	530	0	530	0	525	0	0	528.357	0.62553
7.8955	0	525	0	527	0	530	0	530	0	530	0	530	0	530	0	530	0	530	0	525	0	525	0	530	0	530	0	525	0	0	528.357	0.62553
7.9064	0	525	0	527	0	530	0	530	0	530	0	530	0	530	0	530	0	530	0	525	0	525	0	530	0	530	0	525	0	0	528.357	0.62553
7.9173	0	525	0	527	0	530	0	530	0	530	0	530	0	530	0	530	0	530	0	525	0	525	0	530	0	530	0	525	0	0	528.357	0.62553
7.9281	0	525	0	527	0	530	0	530	0	530	0	530	0	530	0	530	0	530	0	525	0	525	0	530	0	530	0	525	0	0	528.357	0.62553
7.939	0	525	0	527	0	530	0	530	0	530	0	530	0	530	0	530	0	530	0	525	0	525	0	530	0	530	0	525	0	0	528.357	0.62553
7.9498	0	525	0	527	0	530	0	530	0	530	0	530	0	530	0	530	0	530	0	525	0	525	0	530	0	530	0	525	0	0	528.357	0.62553
7.9607	0	525	0	527	0	530	0	530	0	530	0	530	0	530	0	530	0	530	0	525	0	525	0	530	0	530	0	525	0	0	528.357	0.62553
7.9716	0	525	0	527	0	530	0	530	0	530	0	530	0	530	0	530	0	530	0	525	0	525	0	530	0	530	0	525	0	0	528.357	0.62553
7.9824	0	525	0	527	0	530	0	530	0	530	0	530	0	530	0	530	0	530	0	525	0	525	0	530	0	530	0	525	0	0	528.357	0.62553
7.9933	0	525	0	527	0	530	0	530	0	530	0	530	0	530	0	530	0	530	0	525	0	525	0	530	0	530	0	525	0	0	528.357	0.62553
8.0041	0	525	0	527	0	530	0	530	0	530	0	530	0	530	0	530	0	530	0	525	0	525	0	530	0	530	0	525	0	0	528.357	0.62553
8.015	0	525	0	527	0	530	0	530	0	530	0	530	0	530	0	530	0	530	0	525	0	525	0	530	0	530	0	525	0	0	528.357	0.62553
8.0259	0	525	0	527	0	530	0	530	0	530	0	530	0	530	0	530	0	530	0	525	0	525	0	530	0	530	0	525	0	0	528.357	0.62553
8.0367	0	525	0	527	0	530	0	530	0	530	0	530	0	530	0	530	0	530	0	525	0	525	0	530	0	530	0	525	0	0	528.357	0.62553
8.0476	0	525	0	527	0	530	0	530	0	530	0	530	0	530	0	530	0	530	0	525	0	525	0	530	0	530	0	525	0	0	528.357	0.62553
8.0584	0	525	0	527	0	530	0	530	0	530	0	530	0	530	0	530	0	530	0	525	0	525	0	530	0	530	0	525	0	0	528.357	0.62553
8.0693	0	525	0	527	0	530	0	530	0	530	0	530	0	530	0	530	0	530	0	525	0	525	0	530	0	530	0	525	0	0	528.357	0.62553
8.0802	0	525	0	527	0	530	0	530	0	530	0	530	0	530	0	530	0	530	0	525	0	525	0	530	0	530	0	525	0	0	528.357	0.62553
8.091	0	525	0	527	0	530	0	530	0	530	0	530	0	530	0	530	0	530	0	525	0	525	0	530	0	530	0	525	0	0	528.357	0.62553
8.1019	0	525	0	527	0	530	0	530	0	530	0	530	0	530	0	530	0	530	0	525	0	525	0	530	0	530	0	525	0	0	528.357	0.62553
8.1127	0	525	0	527	0	530	0	530	0	530	0	530	0	530	0	530	0	530	0	525	0	525	0	530	0	530	0	525	0	0	528.357	0.62553
8.1236	0	525	0	527	0	530	0	530	0	530	0	530	0	530	0	530	0	530	0	525	0	525	0	530	0	530	0	525	0	0	528.357	0.62553
8.1345	0	525	0	527	0	530	0	530	0	530	0	530	0	530	0	530	0	530	0	525	0	525	0	530	0	530	0	525	0	0	528.357	0.62553
8.1453	0	525	0	527	0	530	0	530	0	530	0	530	0	530	0	530	0	530	0	525	0	525	0	530	0	530	0	525	0	0	528.357	0.62553
8.1562	0	525	0	527	0	530	0	530	0	530	0	530	0	530	0	530	0	530	0	525	0	525	0	530	0	530	0	525	0	0	528.357	0.62553
8.167	0	525	0	527	0	530	0	530	0	530	0	530	0	530	0	530	0	530	0	525	0	525	0	530	0	530	0	525	0	0	528.357	0.62553
8.1779	0	525	0	527	0	530	0	530	0	530	0	530	0	530	0	530	0	530	0	525	0	525	0	530	0	530	0	525	0	0	528.357	0.62553
8.1888	0	525	0	527	0	530	0	530	0	530	0	530	0	530	0	530	0	530	0	525	0	525	0	530	0	530	0	525	0	0	528.357	0.62553
8.1996	0	525	0	527	0	530	0	530	0	530	0	530	0	530	0	530	0	530	0	525	0	525	0	530	0	530	0	525	0	0	528.357	0.62553
8.2105	0	525	0	527	0	530	0	530	0	530	0	530	0	530	0	530	0	530	0	525	0	525	0	530	0	530	0	525	0	0	528.357	0.62553
8.2214	0	525	0	527	0	530	0	530	0	530	0	530	0	530	0	530	0	530	0	525	0	525	0	530	0	530	0	525	0	0	528.357	0.62553
8.2322	0	525	0	527	0	530	0	530	0	530	0	530	0	530	0	530	0	530	0	525	0	525	0	530	0	530	0	525	0	0	528.357	0.62553
8.2431	0	525	0	527	0	530	0	530	0	530	0	530	0	530	0	530	0	530	0	525	0	525	0	530	0	530	0	525	0	0	528.357	0.62553
8.2539	0	525	0	527	0	530	0	530	0	530	0	530	0	530	0	530	0	530	0	525	0	525	0	530	0	530	0	525	0	0	528.357	0.62553
8.2648	0	525	0	527	0	530	0	530	0	530	0	530	0	530	0	530	0	530	0	525	0	525	0	530	0	530	0	525	0	0	528.357	0.62553
8.2757	0	525	0	527	0	530	0	530	0	530	0	530	0	530	0	530	0	530	0	525	0	525	0	530	0	530	0	525	0	0	528.357	0.62553
8.2865	0	525	0	527	0	530	0	530	0	530	0	530	0	530	0	530	0	530	0	525	0	525	0	530	0	530	0	525	0	0	528.357	0.62553
8.2974	0	525	0	527	0	530	0	530	0	530	0	530	0	530	0	530	0	530	0	525	0	525	0	530	0	530	0	525	0	0	528.357	0.62553
8.3082	0	525	0	527	0	530	0	530	0	530	0	530	0	530	0	530	0	530	0	525	0	525	0	530	0	530	0	525	0	0	528.357	0.62553
8.3191	0	525	0	527	0	530	0	530	0	530	0	530	0	530	0	530	0	530	0	525	0	525	0	530	0	530	0	525	0	0	528.357	0.62553
8.33	0	525	0	527	0	530	0	530	0	530	0	530	0	530	0	530	0	530	0	525	0	525	0	530	0	530	0	525	0	0	528.357	0.62553
8.3408	0	525	0	527	0	530	0	530	0	530	0	530	0	530	0	530	0	530	0	525	0	525	0	530	0	530	0	525	0	0	528.357	0.62553
8.3517	0	525	0	527	0	530	0	530	0	530	0	530	0	530	0	530	0	530	0	525	0	525	0	530	0	530	0	525	0	0	528.357	0.62553
8.3625	0	525	0	527	0	530	0	530	0	530	0	530	0	530	0	530	0	530	0	525	0	525	0	530	0	530	0	525	0	0	528.357	0.62553
8.3734	0	525	0	527	0	530	0	530	0	530	0	530	0	530	0	530	0	530	0	525	0	525	0	530	0	530	0	525	0	0	528.357	0.62553
8.3843	0	525	0	527	0	530	0	530	0	530	0	530	0	530	0	530	0	530	0	525	0	525	0	530	0	530	0	525	0	0	528.357	0.62553
8.3951	0	525	0	527	0	530	0	530	0	530	0	530	0	530	0	530	0	530	0	525	0	525	0	530	0	530	0	525	0	0	528.357	0.62553
8.406	0	525	0	527	0	530	0	530	0	530	0	530	0	530	0	530	0	530	0	525	0	525	0	530	0	530	0	525	0	0	528.357	0.62553
8.4168	0	525	0	527	0	530	0	530	0	530	0	530	0	530	0	530	0	530	0	525	0	525	0	530	0	530	0	525	0	0	528.357	0.62553
8.4277	0	525	0	527	0	530	0	530	0	530	0	530	0	530	0	530	0	530	0	525	0	525	0	530	0	530	0	525	0	0	528.357	0.62553
8.4386	0	525	0	527	0	530	0	530	0	530	0	530	0	530	0	530	0	530	0	525	0	525	0	530	0	530	0	525	0	0	528.357	0.62553
8.4494	0	525	0	527	0	530	0	530	0	530	0	530	0	530	0	530	0	530	0	525	0	525	0	530	0	530	0	525	0	0	528.357	0.62553
8.4603	0	525	0	527	0	530	0	530	0	530	0	530	0	530	0	530	0	530	0	525	0	525	0	530	0	530	0	525	0	0	528.357	0.62553
8.4711	0	525	0	527	0	530	0	530	0	530	0	530	0	530	0	530	0	530	0	525	0	525	0	530	0	530	0	525	0	0	528.357	0.62553
8.482	0	525	0	527	0	530	0	530	0	530	0	530	0	530	0	530	0	530	0	525	0	525	0	530	0	530	0	525	0	0	528.357	0.62553
8.4929	0	525	0	527	0	530	0	530	0	530	0	530	0	530	0	530	0	530	0	525	0	525	0	530	0	530	0	525	0	0	528.357	0.62553
8.5037	0	525	0	527	0	530	0	530	0	530	0	530	0	530	0	530	0	530	0	525	0	525	0	530	0	530	0	525	0	0	528.357	0.62553
8.5146	0	525	0	527	0	530	0	530	0	530	0	530	0	530	0	530	0	530	0	525	0	525	0	530	0	530	0	525	0	0	528.357	0.62553
8.5254	0	525	0	527	0	530	0	530	0	530	0	530	0	530	0	530	0	530	0	525	0	525	0	530	0	530	0	525	0	0	528.357	0.62553
8.5363	0	525	0	527	0	530	0	530	0	530	0	530	0	530	0	530	0	530	0	525	0	525	0	530	0	530	0	525	0	0	528.357	0.62553
8.5472	0	525	0	527	0	530	0	530	0	530	0	530	0	530	0	530	0	530	0	525	0	525	0	530	0	530	0	525	0	0	528.357	0.62553
8.558	0	525	0	527	0	530	0	530	0	530	0	530	0	530	0	530	0	530	0	525	0	525	0	530	0	530	0	525	0	0	528.357	0.62553
8.5689	0	525	0	527	0	530	0	530	0	530	0	530	0	530	0	530	0	530	0	525	0	525	0	530	0	530	0	525	0	0	528.357	0.62553
8.5797	0	525	0	527	0	530	0	530	0	530	0	530	0	530	0	530	0	530	0	525	0	525	0	530	0	530	0	525	0	0	528.357	0.62553
8.5906	0	525	0	527	0	530	0	530	0	530	0	530	0	530	0	530	0	530	0	525	0	525	0	530	0	530	0	525	0	0	528.357	0.62553
8.6015	0	525	0	527	0	530	0	530	0	530	0	530	0	530	0	530	0	530	0	525	0	525	0	530	0	530	0	525	0	0	528.357	0.62553
8.6123	0	525	0	527	0	530	0	530	0	530	0	530	0	530	0	530	0	530	0	525	0	525	0	530	0	530	0	525	0	0	528.357	0.62553
8.6232	0	525	0	527	0	530	0	530	0	530	0	530	0	530	0	530	0	530	0	525	0	525	0	530	0	530	0	525	0	0	528.357	0.62553
8.634	0	525	0	527	0	530	0	530	0	530	0	530	0	530	0	530	0	530	0	525	0	525	0	530	0	530	0	525	0	0	528.357	0.62553
8.6449	0	525	0	527	0	530	0	530	0	530	0	530	0	530	0	530	0	530	0	525	0	525	0	530	0	530	0	525	0	0	528.357	0.62553
8.6558	0	525	0	527	0	530	0	530	0	530	0	530	0	530	0	530	0	530	0	525	0	525	0	530	0	530	0	525	0	0	528.357	0.62553
8.6666	0	525	0	527	0	530	0	530	0	530	0	530	0	530	0	530	0	530	0	525	0	525	0	530	0	530	0	525	0	0	528.357	0.62553
8.6775	0	525	0	527	0	530	0	530	0	530	0	530	0	530	0	530	0	530	0	525	0	525	0	530	0	530	0	525	0	0	528.357	0.62553
8.6883	0	525	0	527	0	530	0	530	0	530	0	530	0	530	0	530	0	530	0	525	0	525	0	530	0	530	0	525	0	0	528.357	0.62553
8.6992	0	525	0	527	0	530	0	530	0	530	0	530	0	530	0	530	0	530	0	525	0	525	0	530	0	530	0	525	0	0	528.357	0.62553
8.7101	0	525	0	527	0	530	0	530	0	530	0	530	0	530	0	530	0	530	0	525	0	525	0	530	0	530	0	525	0	0	528.357	0.62553
8.7209	0	525	0	527	0	530	0	530	0	530	0	530	0	530	0	530	0	530	0	525	0	525	0	530	0	530	0	525	0	0	528.357	0.62553
8.7318	0	525	0	527	0	530	0	530	0	530	0	530	0	530	0	530	0	530	0	525	0	525	0	530	0	530	0	525	0	0	528.357	0.62553
8.7427	0	525	0	527	0	530	0	530	0	530	0	530	0	530	0	530	0	530	0	525	0	525	0	530	0	530	0	525	0	0	528.357	0.62553
8.7535	0	525	0	527	0	530	0	530	0	530	0	530	0	530	0	530	0	530	0	525	0	525	0	530	0	530	0	525	0	0	528.357	0.62553
8.7644	0	525	0	527	0	530	0	530	0	530	0	530	0	530	0	530	0	530	0	525	0	525	0	530	0	530	0	525	0	0	528.357	0.62553
8.7752	0	525	0	527	0	530	0	530	0	530	0	530	0	530	0	530	0	530	0	525	0	525	0	530	0	530	0	525	0	0	528.357	0.62553
8.7861	0	525	0	527	0	530	0	530	0	530	0	530	0	530	0	530	0	530	0	525	0	525	0	530	0	530	0	525	0	0	528.357	0.62553
8.797	0	525	0	527	0	530	0	530	0	530	0	530	0	530	0	530	0	530	0	525	0	525	0	530	0	530	0	525	0	0	528.357	0.62553
8.8078	0	525	0	527	0	530	0	530	0	530	0	530	0	530	0	530	0	530	0	525	0	525	0	530	0	530	0	525	0	0	528.357	0.62553
8.8187	0	525	0	527	0	530	0	530	0	530	0	530	0	530	0	530	0	530	0	525	0	525	0	530	0	530	0	525	0	0	528.357	0.62553
8.8295	0	525	0	527	0	530	0	530	0	530	0	530	0	530	0	530	0	530	0	525	0	525	0	530	0	530	0	525	0	0	528.357	0.62553
8.8404	0	525	0	527	0	530	0	530	0	530	0	530	0	530	0	530	0	530	0	525	0	525	0	530	0	530	0	525	0	0	528.357	0.62553
8.8513	0	525	0	527	0	530	0	530	0	530	0	530	0	530	0	530	0	530	0	525	0	525	0	530	0	530	0	525	0	0	528.357	0.62553
8.8621	0	525	0	527	0	530	0	530	0	530	0	530	0	530	0	530	0	530	0	525	0	525	0	530	0	530	0	525	0	0	528.357	0.62553
8.873	0	525	0	527	0	530	0	530	0	530	0	530	0	530	0	530	0	530	0	525	0	525	0	530	0	530	0	525	0	0	528.357	0.62553
8.8838	0	525	0	527	0	530	0	530	0	530	0	530	0	530	0	530	0	530	0	525	0	525	0	530	0	530	0	525	0	0	528.357	0.62553
8.8947	0	525	0	527	0	530	0	530	0	530	0	530	0	530	0	530	0	530	0	525	0	525	0	530	0	530	0	525	0	0	528.357	0.62553
8.9056	0	525	0	527	0	530	0	530	0	530	0	530	0	530	0	530	0	530	0	525	0	525	0	530	0	530	0	525	0	0	528.357	0.62553
8.9164	0	525	0	527	0	530	0	530	0	530	0	530	0	530	0	530	0	530	0	525	0	525	0	530	0	530	0	525	0	0	528.357	0.62553
8.9273	0	525	0	527	0	530	0	530	0	530	0	530	0	530	0	530	0	530	0	525	0	525	0	530	0	530	0	525	0	0	528.357	0.62553
8.9381	0	525	0	527	0	530	0	530	0	530	0	530	0	530	0	530	0	530	0	525	0	525	0	530	0	530	0	525	0	0	528.357	0.62553
8.949	0	525	0	527	0	530	0	530	0	530	0	530	0	530	0	530	0	530	0	525	0	525	0	530	0	530	0	525	0	0	528.357	0.62553
8.9599	0	525	0	527	0	530	0	530	0	530	0	530	0	530	0	530	0	530	0	525	0	525	0	530	0	530	0	525	0	0	528.357	0.62553
8.9707	0	525	0	527	0	530	0	530	0	530	0	530	0	530	0	530	0	530	0	525	0	525	0	530	0	530	0	525	0	0	528.357	0.62553
8.9816	0	525	0	527	0	530	0	530	0	530	0	530	0	530	0	530	0	530	0	525	0	525	0	530	0	530	0	525	0	0	528.357	0.62553
8.9924	0	525	0	527	0	530	0	530	0	530	0	530	0	530	0	530	0	530	0	525	0	525	0	530	0	530	0	525	0	0	528.357	0.62553
9.0033	0	525	0	527	0	530	0	530	0	530	0	530	0	530	0	530	0	530	0	525	0	525	0	530	0	530	0	525	0	0	528.357	0.62553
9.0142	0	525	0	527	0	530	0	530	0	530	0	530	0	530	0	530	0	530	0	525	0	525	0	530	0	530	0	525	0	0	528.357	0.62553
9.025	0	525	0	527	0	530	0	530	0	530	0	530	0	530	0	530	0	530	0	525	0	525	0	530	0	530	0	525	0	0	528.357	0.62553
9.0359	0	525	0	527	0	530	0	530	0	530	0	530	0	530	0	530	0	530	0	525	0	525	0	530	0	530	0	525	0	0	528.357	0.62553
9.0467	0	525	0	527	0	530	0	530	0	530	0	530	0	530	0	530	0	530	0	525	0	525	0	530	0	530	0	525	0	0	528.357	0.62553
9.0576	0	525	0	527	0	530	0	530	0	530	0	530	0	530	0	530	0	530	0	525	0	525	0	530	0	530	0	525	0	0	528.357	0.62553
9.0685	0	525	0	527	0	530	0	530	0	530	0	530	0	530	0	530	0	530	0	525	0	525	0	530	0	530	0	525	0	0	528.357	0.62553
9.0793	0	525	0	527	0	530	0	530	0	530	0	530	0	530	0	530	0	530	0	525	0	525	0	530	0	530	0	525	0	0	528.357	0.62553
9.0902	0	525	0	527	0	530	0	530	0	530	0	530	0	530	0	530	0	530	0	525	0	525	0	530	0	530	0	525	0	0	528.357	0.62553
9.101	0	525	0	527	0	530	0	530	0	530	0	530	0	530	0	530	0	530	0	525	0	525	0	530	0	530	0	525	0	0	528.357	0.62553
9.1119	0	525	0	527	0	530	0	530	0	530	0	530	0	530	0	530	0	530	0	525	0	525	0	530	0	530	0	525	0	0	528.357	0.62553
9.1228	0	525	0	527	0	530	0	530	0	530	0	530	0	530	0	530	0	530	0	525	0	525	0	530	0	530	0	525	0	0	528.357	0.62553
9.1336	0	525	0	527	0	530	0	530	0	530	0	530	0	530	0	530	0	530	0	525	0	525	0	530	0	530	0	525	0	0	528.357	0.62553
9.1445	0	525	0	527	0	530	0	530	0	530	0	530	0	530	0	530	0	530	0	525	0	525	0	530	0	530	0	525	0	0	528.357	0.62553
9.1553	0	525	0	527	0	530	0	530	0	530	0	530	0	530	0	530	0	530	0	525	0	525	0	530	0	530	0	525	0	0	528.357	0.62553
9.1662	0	525	0	527	0	530	0	530	0	530	0	530	0	530	0	530	0	530	0	525	0	525	0	530	0	530	0	525	0	0	528.357	0.62553
9.1771	0	525	0	527	0	530	0	530	0	530	0	530	0	530	0	530	0	530	0	525	0	525	0	530	0	530	0	525	0	0	528.357	0.62553
9.1879	0	525	0	527	0	530	0	530	0	530	0	530	0	530	0	530	0	530	0	525	0	525	0	530	0	530	0	525	0	0	528.357	0.62553
9.1988	0	525	0	527	0	530	0	530	0	530	0	530	0	530	0	530	0	530	0	525	0	525	0	530	0	530	0	525	0	0	528.357	0.62553
9.2096	0	525	0	527	0	530	0	530	0	530	0	530	0	530	0	530	0	530	0	525	0	525	0	530	0	530	0	525	0	0	528.357	0.62553
9.2205	0	525	0	527	0	530	0	530	0	530	0	530	0	530	0	530	0	530	0	525	0	525	0	530	0	530	0	525	0	0	528.357	0.62553
9.2314	0	525	0	527	0	530	0	530	0	530	0	530	0	530	0	530	0	530	0	525	0	525	0	530	0	530	0	525	0	0	528.357	0.62553
9.2422	0	525	0	527	0	530	0	530	0	530	0	530	0	530	0	530	0	530	0	525	0	525	0	530	0	530	0	525	0	0	528.357	0.62553
9.2531	0	525	0	527	0	530	0	530	0	530	0	530	0	530	0	530	0	530	0	525	0	525	0	530	0	530	0	525	0	0	528.357	0.62553
9.264	0	525	0	527	0	530	0	530	0	530	0	530	0	530	0	530	0	530	0	525	0	525	0	530	0	530	0	525	0	0	528.357	0.62553
9.2748	0	525	0	527	0	530	0	530	0	530	0	530	0	530	0	530	0	530	0	525	0	525	0	530	0	530	0	525	0	0	528.357	0.62553
9.2857	0	525	0	527	0	530	0	530	0	530	0	530	0	530	0	530	0	530	0	525	0	525	0	530	0	530	0	525	0	0	528.357	0.62553
9.2965	0	525	0	527	0	530	0	530	0	530	0	530	0	530	0	530	0	530	0	525	0	525	0	530	0	530	0	525	0	0	528.357	0.62553
9.3074	0	525	0	527	0	530	0	530	0	530	0	530	0	530	0	530	0	530	0	525	0	525	0	530	0	530	0	525	0	0	528.357	0.62553
9.3183	0	525	0	527	0	530	0	530	0	530	0	530	0	530	0	530	0	530	0	525	0	525	0	530	0	530	0	525	0	0	528.357	0.62553
9.3291	0	525	0	527	0	530	0	530	0	530	0	530	0	530	0	530	0	530	0	525	0	525	0	530	0	530	0	525	0	0	528.357	0.62553
9.34	0	525	0	527	0	530	0	530	0	530	0	530	0	530	0	530	0	530	0	525	0	525	0	530	0	530	0	525	0	0	528.357	0.62553
9.3508	0	525	0	527	0	530	0	530	0	530	0	530	0	530	0	530	0	530	0	525	0	525	0	530	0	530	0	525	0	0	528.357	0.62553
9.3617	0	525	0	527	0	530	0	530	0	530	0	530	0	530	0	530	0	530	0	525	0	525	0	530	0	530	0	525	0	0	528.357	0.62553
9.3726	0	525	0	527	0	530	0	530	0	530	0	530	0	530	0	530	0	530	0	525	0	525	0	530	0	530	0	525	0	0	528.357	0.62553
9.3834	0	525	0	527	0	530	0	530	0	530	0	530	0	530	0	530	0	530	0	525	0	525	0	530	0	530	0	525	0	0	528.357	0.62553
9.3943	0	525	0	527	0	530	0	530	0	530	0	530	0	530	0	530	0	530	0	525	0	525	0	530	0	530	0	525	0	0	528.357	0.62553
9.4051	0	525	0	527	0	530	0	530	0	530	0	530	0	530	0	530	0	530	0	525	0	525	0	530	0	530	0	525	0	0	528.357	0.62553
9.416	0	525	0	527	0	530	0	530	0	530	0	530	0	530	0	530	0	530	0	525	0	525	0	530	0	530	0	525	0	0	528.357	0.62553
9.4269	0	525	0	527	0	530	0	530	0	530	0	530	0	530	0	530	0	530	0	525	0	525	0	530	0	530	0	525	0	0	528.357	0.62553
9.4377	0	525	0	527	0	530	0	530	0	530	0	530	0	530	0	530	0	530	0	525	0	525	0	530	0	530	0	525	0	0	528.357	0.62553
9.4486	0	525	0	527	0	530	0	530	0	530	0	530	0	530	0	530	0	530	0	525	0	525	0	530	0	530	0	525	0	0	528.357	0.62553
9.4594	0	525	0	527	0	530	0	530	0	530	0	530	0	530	0	530	0	530	0	525	0	525	0	530	0	530	0	525	0	0	528.357	0.62553
9.4703	0	525	0	527	0	530	0	530	0	530	0	530	0	530	0	530	0	530	0	525	0	525	0	530	0	530	0	525	0	0	528.357	0.62553
9.4812	0	525	0	527	0	530	0	530	0	530	0	530	0	530	0	530	0	530	0	525	0	525	0	530	0	530	0	525	0	0	528.357	0.62553
9.492	0	525	0	527	0	530	0	530	0	530	0	530	0	530	0	530	0	530	0	525	0	525	0	530	0	530	0	525	0	0	528.357	0.62553
9.5029	0	525	0	527	0	530	0	530	0	530	0	530	0	530	0	530	0	530	0	525	0	525	0	530	0	530	0	525	0	0	528.357	0.62553
9.5137	0	525	0	527	0	530	0	530	0	530	0	530	0	530	0	530	0	530	0	525	0	525	0	530	0	530	0	525	0	0	528.357	0.62553
9.5246	0	525	0	527	0	530	0	530	0	530	0	530	0	530	0	530	0	530	0	525	0	525	0	530	0	530	0	525	0	0	528.357	0.62553
9.5355	0	525	0	527	0	530	0	530	0	530	0	530	0	530	0	530	0	530	0	525	0	525	0	530	0	530	0	525	0	0	528.357	0.62553
9.5463	0	525	0	527	0	530	0	530	0	530	0	530	0	530	0	530	0	530	0	525	0	525	0	530	0	530	0	525	0	0	528.357	0.62553
9.5572	0	525	0	527	0	530	0	530	0	530	0	530	0	530	0	530	0	530	0	525	0	525	0	530	0	530	0	525	0	0	528.357	0.62553
9.568	0	525	0	527	0	530	0	530	0	530	0	530	0	530	0	530	0	530	0	525	0	525	0	530	0	530	0	525	0	0	528.357	0.62553
9.5789	0	525	0	527	0	530	0	530	0	530	0	530	0	530	0	530	0	530	0	525	0	525	0	530	0	530	0	525	0	0	528.357	0.62553
9.5898	0	525	0	527	0	530	0	530	0	530	0	530	0	530	0	530	0	530	0	525	0	525	0	530	0	530	0	525	0	0	528.357	0.62553
9.6006	0	525	0	527	0	530	0	530	0	530	0	530	0	530	0	530	0	530	0	525	0	525	0	530	0	530	0	525	0	0	528.357	0.62553
9.6115	0	525	0	527	0	530	0	530	0	530	0	530	0	530	0	530	0	530	0	525	0	525	0	530	0	530	0	525	0	0	528.357	0.62553
9.6223	0	525	0	527	0	530	0	530	0	530	0	530	0	530	0	530	0	530	0	525	0	525	0	530	0	530	0	525	0	0	528.357	0.62553
9.6332	0	525	0	527	0	530	0	530	0	530	0	530	0	530	0	530	0	530	0	525	0	525	0	530	0	530	0	525	0	0	528.357	0.62553
9.6441	0	525	0	527	0	530	0	530	0	530	0	530	0	530	0	530	0	530	0	525	0	525	0	530	0	530	0	525	0	0	528.357	0.62553
9.6549	0	525	0	527	0	530	0	530	0	530	0	530	0	530	0	530	0	530	0	525	0	525	0	530	0	530	0	525	0	0	528.357	0.62553
9.6658	0	525	0	527	0	530	0	530	0	530	0	530	0	530	0	530	0	530	0	525	0	525	0	530	0	530	0	525	0	0	528.357	0.62553
9.6766	0	525	0	527	0	530	0	530	0	530	0	530	0	530	0	530	0	530	0	525	0	525	0	530	0	530	0	525	0	0	528.357	0.62553
9.6875	0	525	0	527	0	530	0	530	0	530	0	530	0	530	0	530	0	530	0	525	0	525	0	530	0	530	0	525	0	0	528.357	0.62553
9.6984	0	525	0	527	0	530	0	530	0	530	0	530	0	530	0	530	0	530	0	525	0	525	0	530	0	530	0	525	0	0	528.357	0.62553
9.7092	0	525	0	527	0	530	0	530	0	530	0	530	0	530	0	530	0	530	0	525	0	525	0	530	0	530	0	525	0	0	528.357	0.62553
9.7201	0	525	0	527	0	530	0	530	0	530	0	530	0	530	0	530	0	530	0	525	0	525	0	530	0	530	0	525	0	0	528.357	0.62553
9.731	0	525	0	527	0	530	0	530	0	530	0	530	0	530	0	530	0	530	0	525	0	525	0	530	0	530	0	525	0	0	528.357	0.62553
9.7418	0	525	0	527	0	530	0	530	0	530	0	530	0	530	0	530	0	530	0	525	0	525	0	530	0	530	0	525	0	0	528.357	0.62553
9.7527	0	525	0	527	0	530	0	530	0	530	0	530	0	530	0	530	0	530	0	525	0	525	0	530	0	530	0	525	0	0	528.357	0.62553
9.7635	0	525	0	527	0	530	0	530	0	530	0	530	0	530	0	530	0	530	0	525	0	525	0	530	0	530	0	525	0	0	528.357	0.62553
9.7744	0	525	0	527	0	530	0	530	0	530	0	530	0	530	0	530	0	530	0	525	0	525	0	530	0	530	0	525	0	0	528.357	0.62553
9.7853	0	525	0	527	0	530	0	530	0	530	0	530	0	530	0	530	0	530	0	525	0	525	0	530	0	530	0	525	0	0	528.357	0.62553
9.7961	0	525	0	527	0	530	0	530	0	530	0	530	0	530	0	530	0	530	0	525	0	525	0	530	0	530	0	525	0	0	528.357	0.62553
9.807	0	525	0	527	0	530	0	530	0	530	0	530	0	530	0	530	0	530	0	525	0	525	0	530	0	530	0	525	0	0	528.357	0.62553
9.8178	0	525	0	527	0	530	0	530	0	530	0	530	0	530	0	530	0	530	0	525	0	525	0	530	0	530	0	525	0	0	528.357	0.62553
9.8287	0	525	0	527	0	530	0	530	0	530	0	530	0	530	0	530	0	530	0	525	0	525	0	530	0	530	0	525	0	0	528.357	0.62553
9.8396	0	525	0	527	0	530	0	530	0	530	0	530	0	530	0	530	0	530	0	525	0	525	0	530	0	530	0	525	0	0	528.357	0.62553
9.8504	0	525	0	527	0	530	0	530	0	530	0	530	0	530	0	530	0	530	0	525	0	525	0	530	0	530	0	525	0	0	528.357	0.62553
9.8613	0	525	0	527	0	530	0	530	0	530	0	530	0	530	0	530	0	530	0	525	0	525	0	530	0	530	0	525	0	0	528.357	0.62553
9.8721	0	525	0	527	0	530	0	530	0	530	0	530	0	530	0	530	0	530	0	525	0	525	0	530	0	530	0	525	0	0	528.357	0.62553
9.883	0	525	0	527	0	530	0	530	0	530	0	530	0	530	0	530	0	530	0	525	0	525	0	530	0	530	0	525	0	0	528.357	0.62553
9.8939	0	525	0	527	0	530	0	530	0	530	0	530	0	530	0	530	0	530	0	525	0	525	0	530	0	530	0	525	0	0	528.357	0.62553
9.9047	0	525	0	527	0	530	0	530	0	530	0	530	0	530	0	530	0	530	0	525	0	525	0	530	0	530	0	525	0	0	528.357	0.62553
9.9156	0	525	0	527	0	530	0	530	0	530	0	530	0	530	0	530	0	530	0	525	0	525	0	530	0	530	0	525	0	0	528.357	0.62553
9.9264	0	525	0	527	0	530	0	530	0	530	0	530	0	530	0	530	0	530	0	525	0	525	0	530	0	530	0	525	0	0	528.357	0.62553
9.9373	0	525	0	527	0	530	0	530	0	530	0	530	0	530	0	530	0	530	0	525	0	525	0	530	0	530	0	525	0	0	528.357	0.62553
9.9482	0	525	0	527	0	530	0	530	0	530	0	530	0	530	0	530	0	530	0	525	0	525	0	530	0	530	0	525	0	0	528.357	0.62553
9.959	0	525	0	527	0	530	0	530	0	530	0	530	0	530	0	530	0	530	0	525	0	525	0	530	0	530	0	525	0	0	528.357	0.62553
9.9699	0	525	0	527	0	530	0	530	0	530	0	530	0	530	0	530	0	530	0	525	0	525	0	530	0	530	0	525	0	0	528.357	0.62553
9.9807	0	525	0	527	0	530	0	530	0	530	0	530	0	530	0	530	0	530	0	525	0	525	0	530	0	530	0	525	0	0	528.357	0.62553
9.9916	0	525	0	527	0	530	0	530	0	530	0	530	0	530	0	530	0	530	0	525	0	525	0	530	0	530	0	525	0	0	528.357	0.62553
10.0025	0	525	0	527	0	530	0	530	0	530	0	530	0	530	0	530	0	530	0	525	0	525	0	530	0	530	0	525	0	0	528.357	0.62553
10.0133	0	525	0	527	0	530	0	530	0	530	0	530	0	530	0	530	0	530	0	525	0	525	0	530	0	530	0	525	0	0	528.357	0.62553
10.0242	0	525	0	527	0	530	0	530	0	530	0	530	0	530	0	530	0	530	0	525	0	525	0	530	0	530	0	525	0	0	528.357	0.62553
10.035	0	525	0	527	0	530	0	530	0	530	0	530	0	530	0	530	0	530	0	525	0	525	0	530	0	530	0	525	0	0	528.357	0.62553
10.0459	0	525	0	527	0	530	0	530	0	530	0	530	0	530	0	530	0	530	0	525	0	525	0	530	0	530	0	525	0	0	528.357	0.62553
10.0568	0	525	0	527	0	530	0	530	0	530	0	530	0	530	0	530	0	530	0	525	0	525	0	530	0	530	0	525	0	0	528.357	0.62553
10.0676	0	525	0	527	0	530	0	530	0	530	0	530	0	530	0	530	0	530	0	525	0	525	0	530	0	530	0	525	0	0	528.357	0.62553
10.0785	0	525	0	527	0	530	0	530	0	530	0	530	0	530	0	530	0	530	0	525	0	525	0	530	0	530	0	525	0	0	528.357	0.62553
10.0893	0	525	0	527	0	530	0	530	0	530	0	530	0	530	0	530	0	530	0	525	0	525	0	530	0	530	0	525	0	0	528.357	0.62553
10.1002	0	525	0	527	0	530	0	530	0	530	0	530	0	530	0	530	0	530	0	525	0	525	0	530	0	530	0	525	0	0	528.357	0.62553
10.1111	0	525	0	527	0	530	0	530	0	530	0	530	0	530	0	530	0	530	0	525	0	525	0	530	0	530	0	525	0	0	528.357	0.62553
10.1219	0	525	0	527	0	530	0	530	0	530	0	530	0	530	0	530	0	530	0	525	0	525	0	530	0	530	0	525	0	0	528.357	0.62553
10.1328	0	525	0	527	0	530	0	530	0	530	0	530	0	530	0	530	0	530	0	525	0	525	0	530	0	530	0	525	0	0	528.357	0.62553
10.1436	0	525	0	527	0	530	0	530	0	530	0	530	0	530	0	530	0	530	0	525	0	525	0	530	0	530	0	525	0	0	528.357	0.62553
10.1545	0	525	0	527	0	530	0	530	0	530	0	530	0	530	0	530	0	530	0	525	0	525	0	530	0	530	0	525	0	0	528.357	0.62553
10.1654	0	525	0	527	0	530	0	530	0	530	0	530	0	530	0	530	0	530	0	525	0	525	0	530	0	530	0	525	0	0	528.357	0.62553
10.1762	0	525	0	527	0	530	0	530	0	530	0	530	0	530	0	530	0	530	0	525	0	525	0	530	0	530	0	525	0	0	528.357	0.62553
10.1871	0	525	0	527	0	530	0	530	0	530	0	530	0	530	0	530	0	530	0	525	0	525	0	530	0	530	0	525	0	0	528.357	0.62553
10.1979	0	525	0	527	0	530	0	530	0	530	0	530	0	530	0	530	0	530	0	525	0	525	0	530	0	530	0	525	0	0	528.357	0.62553
10.2088	0	525	0	527	0	530	0	530	0	530	0	530	0	530	0	530	0	530	0	525	0	525	0	530	0	530	0	525	0	0	528.357	0.62553
10.2197	0	525	0	527	0	530	0	530	0	530	0	530	0	530	0	530	0	530	0	525	0	525	0	530	0	530	0	525	0	0	528.357	0.62553
10.2305	0	525	0	527	0	530	0	530	0	530	0	530	0	530	0	530	0	530	0	525	0	525	0	530	0	530	0	525	0	0	528.357	0.62553
10.2414	0	525	0	527	0	530	0	530	0	530	0	530	0	530	0	530	0	530	0	525	0	525	0	530	0	530	0	525	0	0	528.357	0.62553
10.2523	0	525	0	527	0	530	0	530	0	530	0	530	0	530	0	530	0	530	0	525	0	525	0	530	0	530	0	525	0	0	528.357	0.62553
10.2631	0	525	0	527	0	530	0	530	0	530	0	530	0	530	0	530	0	530	0	525	0	525	0	530	0	530	0	525	0	0	528.357	0.62553
10.274	0	525	0	527	0	530	0	530	0	530	0	530	0	530	0	530	0	530	0	525	0	525	0	530	0	530	0	525	0	0	528.357	0.62553
10.2848	0	525	0	527	0	530	0	530	0	530	0	530	0	530	0	530	0	530	0	525	0	525	0	530	0	530	0	525	0	0	528.357	0.62553
10.2957	0	525	0	527	0	530	0	530	0	530	0	530	0	530	0	530	0	530	0	525	0	525	0	530	0	530	0	525	0	0	528.357	0.62553
10.3066	0	525	0	527	0	530	0	530	0	530	0	530	0	530	0	530	0	530	0	525	0	525	0	530	0	530	0	525	0	0	528.357	0.62553
10.3174	0	525	0	527	0	530	0	530	0	530	0	530	0	530	0	530	0	530	0	525	0	525	0	530	0	530	0	525	0	0	528.357	0.62553
10.3283	0	525	0	527	0	530	0	530	0	530	0	530	0	530	0	530	0	530	0	525	0	525	0	530	0	530	0	525	0	0	528.357	0.62553
10.3391	0	525	0	527	0	530	0	530	0	530	0	530	0	530	0	530	0	530	0	525	0	525	0	530	0	530	0	525	0	0	528.357	0.62553
10.35	0	525	0	527	0	530	0	530	0	530	0	530	0	530	0	530	0	530	0	525	0	525	0	530	0	530	0	525	0	0	528.357	0.62553
10.3609	0	525	0	527	0	530	0	530	0	530	0	530	0	530	0	530	0	530	0	525	0	525	0	530	0	530	0	525	0	0	528.357	0.62553
10.3717	0	525	0	527	0	530	0	530	0	530	0	530	0	530	0	530	0	530	0	525	0	525	0	530	0	530	0	525	0	0	528.357	0.62553
10.3826	0	525	0	527	0	530	0	530	0	530	0	530	0	530	0	530	0	530	0	525	0	525	0	530	0	530	0	525	0	0	528.357	0.62553
10.3934	0	525	0	527	0	530	0	530	0	530	0	530	0	530	0	530	0	530	0	525	0	525	0	530	0	530	0	525	0	0	528.357	0.62553
10.4043	0	525	0	527	0	530	0	530	0	530	0	530	0	530	0	530	0	530	0	525	0	525	0	530	0	530	0	525	0	0	528.357	0.62553
10.4152	0	525	0	527	0	530	0	530	0	530	0	530	0	530	0	530	0	530	0	525	0	525	0	530	0	530	0	525	0	0	528.357	0.62553
10.426	0	525	0	527	0	530	0	530	0	530	0	530	0	530	0	530	0	530	0	525	0	525	0	530	0	530	0	525	0	0	528.357	0.62553
10.4369	0	525	0	527	0	530	0	530	0	530	0	530	0	530	0	530	0	530	0	525	0	525	0	530	0	530	0	525	0	0	528.357	0.62553
10.4477	0	525	0	527	0	530	0	530	0	530	0	530	0	530	0	530	0	530	0	525	0	525	0	530	0	530	0	525	0	0	528.357	0.62553
10.4586	0	525	0	527	0	530	0	530	0	530	0	530	0	530	0	530	0	530	0	525	0	525	0	530	0	530	0	525	0	0	528.357	0.62553
10.4695	0	525	0	527	0	530	0	530	0	530	0	530	0	530	0	530	0	530	0	525	0	525	0	530	0	530	0	525	0	0	528.357	0.62553
10.4803	0	525	0	527	0	530	0	530	0	530	0	530	0	530	0	530	0	530	0	525	0	525	0	530	0	530	0	525	0	0	528.357	0.62553
10.4912	0	525	0	527	0	530	0	530	0	530	0	530	0	530	0	530	0	530	0	525	0	525	0	530	0	530	0	525	0	0	528.357	0.62553
10.502	0	525	0	527	0	530	0	530	0	530	0	530	0	530	0	530	0	530	0	525	0	525	0	530	0	530	0	525	0	0	528.357	0.62553
10.5129	0	525	0	527	0	530	0	530	0	530	0	530	0	530	0	530	0	530	0	525	0	525	0	530	0	530	0	525	0	0	528.357	0.62553
10.5238	0	525	0	527	0	530	0	530	0	530	0	530	0	530	0	530	0	530	0	525	0	525	0	530	0	530	0	525	0	0	528.357	0.62553
10.5346	0	525	0	527	0	530	0	530	0	530	0	530	0	530	0	530	0	530	0	525	0	525	0	530	0	530	0	525	0	0	528.357	0.62553
10.5455	0	525	0	527	0	530	0	530	0	530	0	530	0	530	0	530	0	530	0	525	0	525	0	530	0	530	0	525	0	0	528.357	0.62553
10.5563	0	525	0	527	0	530	0	530	0	530	0	530	0	530	0	530	0	530	0	525	0	525	0	530	0	530	0	525	0	0	528.357	0.62553
10.5672	0	525	0	527	0	530	0	530	0	530	0	530	0	530	0	530	0	530	0	525	0	525	0	530	0	530	0	525	0	0	528.357	0.62553
10.5781	0	525	0	527	0	530	0	530	0	530	0	530	0	530	0	530	0	530	0	525	0	525	0	530	0	530	0	525	0	0	528.357	0.62553
10.5889	0	525	0	527	0	530	0	530	0	530	0	530	0	530	0	530	0	530	0	525	0	525	0	530	0	530	0	525	0	0	528.357	0.62553
10.5998	0	525	0	527	0	530	0	530	0	530	0	530	0	530	0	530	0	530	0	525	0	525	0	530	0	530	0	525	0	0	528.357	0.62553
10.6106	0	525	0	527	0	530	0	530	0	530	0	530	0	530	0	530	0	530	0	525	0	525	0	530	0	530	0	525	0	0	528.357	0.62553
10.6215	0	525	0	527	0	530	0	530	0	530	0	530	0	530	0	530	0	530	0	525	0	525	0	530	0	530	0	525	0	0	528.357	0.62553
10.6324	0	525	0	527	0	530	0	530	0	530	0	530	0	530	0	530	0	530	0	525	0	525	0	530	0	530	0	525	0	0	528.357	0.62553
10.6432	0	525	0	527	0	530	0	530	0	530	0	530	0	530	0	530	0	530	0	525	0	525	0	530	0	530	0	525	0	0	528.357	0.62553
10.6541	0	525	0	527	0	530	0	530	0	530	0	530	0	530	0	530	0	530	0	525	0	525	0	530	0	530	0	525	0	0	528.357	0.62553
10.6649	0	525	0	527	0	530	0	530	0	530	0	530	0	530	0	530	0	530	0	525	0	525	0	530	0	530	0	525	0	0	528.357	0.62553
10.6758	0	525	0	527	0	530	0	530	0	530	0	530	0	530	0	530	0	530	0	525	0	525	0	530	0	530	0	525	0	0	528.357	0.62553
10.6867	0	525	0	527	0	530	0	530	0	530	0	530	0	530	0	530	0	530	0	525	0	525	0	530	0	530	0	525	0	0	528.357	0.62553
10.6975	0	525	0	527	0	530	0	530	0	530	0	530	0	530	0	530	0	530	0	525	0	525	0	530	0	530	0	525	0	0	528.357	0.62553
10.7084	0	525	0	527	0	530	0	530	0	530	0	530	0	530	0	530	0	530	0	525	0	525	0	530	0	530	0	525	0	0	528.357	0.62553
10.7193	0	525	0	527	0	530	0	530	0	530	0	530	0	530	0	530	0	530	0	525	0	525	0	530	0	530	0	525	0	0	528.357	0.62553
10.7301	0	525	0	527	0	530	0	530	0	530	0	530	0	530	0	530	0	530	0	525	0	525	0	530	0	530	0	525	0	0	528.357	0.62553
10.741	0	525	0	527	0	530	0	530	0	530	0	530	0	530	0	530	0	530	0	525	0	525	0	530	0	530	0	525	0	0	528.357	0.62553
10.7518	0	525	0	527	0	530	0	530	0	530	0	530	0	530	0	530	0	530	0	525	0	525	0	530	0	530	0	525	0	0	528.357	0.62553
10.7627	0	525	0	527	0	530	0	530	0	530	0	530	0	530	0	530	0	530	0	525	0	525	0	530	0	530	0	525	0	0	528.357	0.62553
10.7736	0	525	0	527	0	530	0	530	0	530	0	530	0	530	0	530	0	530	0	525	0	525	0	530	0	530	0	525	0	0	528.357	0.62553
10.7844	0	525	0	527	0	530	0	530	0	530	0	530	0	530	0	530	0	530	0	525	0	525	0	530	0	530	0	525	0	0	528.357	0.62553
10.7953	0	525	0	527	0	530	0	530	0	530	0	530	0	530	0	530	0	530	0	525	0	525	0	530	0	530	0	525	0	0	528.357	0.62553
10.8061	0	525	0	527	0	530	0	530	0	530	0	530	0	530	0	530	0	530	0	525	0	525	0	530	0	530	0	525	0	0	528.357	0.62553
10.817	0	525	0	527	0	530	0	530	0	530	0	530	0	530	0	530	0	530	0	525	0	525	0	530	0	530	0	525	0	0	528.357	0.62553
10.8279	0	525	0	527	0	530	0	530	0	530	0	530	0	530	0	530	0	530	0	525	0	525	0	530	0	530	0	525	0	0	528.357	0.62553
10.8387	0	525	0	527	0	530	0	530	0	530	0	530	0	530	0	530	0	530	0	525	0	525	0	530	0	530	0	525	0	0	528.357	0.62553
10.8496	0	525	0	527	0	530	0	530	0	530	0	530	0	530	0	530	0	530	0	525	0	525	0	530	0	530	0	525	0	0	528.357	0.62553
10.8604	0	525	0	527	0	530	0	530	0	530	0	530	0	530	0	530	0	530	0	525	0	525	0	530	0	530	0	525	0	0	528.357	0.62553
10.8713	0	525	0	527	0	530	0	530	0	530	0	530	0	530	0	530	0	530	0	525	0	525	0	530	0	530	0	525	0	0	528.357	0.62553
10.8822	0	525	0	527	0	530	0	530	0	530	0	530	0	530	0	530	0	530	0	525	0	525	0	530	0	530	0	525	0	0	528.357	0.62553
10.893	0	525	0	527	0	530	0	530	0	530	0	530	0	530	0	530	0	530	0	525	0	525	0	530	0	530	0	525	0	0	528.357	0.62553
10.9039	0	525	0	527	0	530	0	530	0	530	0	530	0	530	0	530	0	530	0	525	0	525	0	530	0	530	0	525	0	0	528.357	0.62553
10.9147	0	525	0	527	0	530	0	530	0	530	0	530	0	530	0	530	0	530	0	525	0	525	0	530	0	530	0	525	0	0	528.357	0.62553
10.9256	0	525	0	527	0	530	0	530	0	530	0	530	0	530	0	530	0	530	0	525	0	525	0	530	0	530	0	525	0	0	528.357	0.62553
10.9365	0	525	0	527	0	530	0	530	0	530	0	530	0	530	0	530	0	530	0	525	0	525	0	530	0	530	0	525	0	0	528.357	0.62553
10.9473	0	525	0	527	0	530	0	530	0	530	0	530	0	530	0	530	0	530	0	525	0	525	0	530	0	530	0	525	0	0	528.357	0.62553
10.9582	0	525	0	527	0	530	0	530	0	530	0	530	0	530	0	530	0	530	0	525	0	525	0	530	0	530	0	525	0	0	528.357	0.62553
10.969	0	525	0	527	0	530	0	530	0	530	0	530	0	530	0	530	0	530	0	525	0	525	0	530	0	530	0	525	0	0	528.357	0.62553
10.9799	0	525	0	527	0	530	0	530	0	530	0	530	0	530	0	530	0	530	0	525	0	525	0	530	0	530	0	525	0	0	528.357	0.62553
10.9908	0	525	0	527	0	530	0	530	0	530	0	530	0	530	0	530	0	530	0	525	0	525	0	530	0	530	0	525	0	0	528.357	0.62553
11.0016	0	525	0	527	0	530	0	530	0	530	0	530	0	530	0	530	0	530	0	525	0	525	0	530	0	530	0	525	0	0	528.357	0.62553
11.0125	0	525	0	527	0	530	0	530	0	530	0	530	0	530	0	530	0	530	0	525	0	525	0	530	0	530	0	525	0	0	528.357	0.62553
11.0233	0	525	0	527	0	530	0	530	0	530	0	530	0	530	0	530	0	530	0	525	0	525	0	530	0	530	0	525	0	0	528.357	0.62553
11.0342	0	525	0	527	0	530	0	530	0	530	0	530	0	530	0	530	0	530	0	525	0	525	0	530	0	530	0	525	0	0	528.357	0.62553
11.0451	0	525	0	527	0	530	0	530	0	530	0	530	0	530	0	530	0	530	0	525	0	525	0	530	0	530	0	525	0	0	528.357	0.62553
11.0559	0	525	0	527	0	530	0	530	0	530	0	530	0	530	0	530	0	530	0	525	0	525	0	530	0	530	0	525	0	0	528.357	0.62553
11.0668	0	525	0	527	0	530	0	530	0	530	0	530	0	530	0	530	0	530	0	525	0	525	0	530	0	530	0	525	0	0	528.357	0.62553
11.0776	0	525	0	527	0	530	0	530	0	530	0	530	0	530	0	530	0	530	0	525	0	525	0	530	0	530	0	525	0	0	528.357	0.62553
11.0885	0	525	0	527	0	530	0	530	0	530	0	530	0	530	0	530	0	530	0	525	0	525	0	530	0	530	0	525	0	0	528.357	0.62553
11.0994	0	525	0	527	0	530	0	530	0	530	0	530	0	530	0	530	0	530	0	525	0	525	0	530	0	530	0	525	0	0	528.357	0.62553
11.1102	0	525	0	527	0	530	0	530	0	530	0	530	0	530	0	530	0	530	0	525	0	525	0	530	0	530	0	525	0	0	528.357	0.62553
11.1211	0	525	0	527	0	530	0	530	0	530	0	530	0	530	0	530	0	530	0	525	0	525	0	530	0	530	0	525	0	0	528.357	0.62553
11.1319	0	525	0	527	0	530	0	530	0	530	0	530	0	530	0	530	0	530	0	525	0	525	0	530	0	530	0	525	0	0	528.357	0.62553
11.1428	0	525	0	527	0	530	0	530	0	530	0	530	0	530	0	530	0	530	0	525	0	525	0	530	0	530	0	525	0	0	528.357	0.62553
11.1537	0	525	0	527	0	530	0	530	0	530	0	530	0	530	0	530	0	530	0	525	0	525	0	530	0	530	0	525	0	0	528.357	0.62553
11.1645	0	525	0	527	0	530	0	530	0	530	0	530	0	530	0	530	0	530	0	525	0	525	0	530	0	530	0	525	0	0	528.357	0.62553
11.1754	0	525	0	527	0	530	0	530	0	530	0	530	0	530	0	530	0	530	0	525	0	525	0	530	0	530	0	525	0	0	528.357	0.62553
11.1862	0	525	0	527	0	530	0	530	0	530	0	530	0	530	0	530	0	530	0	525	0	525	0	530	0	530	0	525	0	0	528.357	0.62553
11.1971	0	525	0	527	0	530	0	530	0	530	0	530	0	530	0	530	0	530	0	525	0	525	0	530	0	530	0	525	0	0	528.357	0.62553
11.208	0	525	0	527	0	530	0	530	0	530	0	530	0	530	0	530	0	530	0	525	0	525	0	530	0	530	0	525	0	0	528.357	0.62553
11.2188	0	525	0	527	0	530	0	530	0	530	0	530	0	530	0	530	0	530	0	525	0	525	0	530	0	530	0	525	0	0	528.357	0.62553
11.2297	0	525	0	527	0	530	0	530	0	530	0	530	0	530	0	530	0	530	0	525	0	525	0	530	0	530	0	525	0	0	528.357	0.62553
11.2406	0	525	0	527	0	530	0	530	0	530	0	530	0	530	0	530	0	530	0	525	0	525	0	530	0	530	0	525	0	0	528.357	0.62553
11.2514	0	525	0	527	0	530	0	530	0	530	0	530	0	530	0	530	0	530	0	525	0	525	0	530	0	530	0	525	0	0	528.357	0.62553
11.2623	0	525	0	527	0	530	0	530	0	530	0	530	0	530	0	530	0	530	0	525	0	525	0	530	0	530	0	525	0	0	528.357	0.62553
11.2731	0	525	0	527	0	530	0	530	0	530	0	530	0	530	0	530	0	530	0	525	0	525	0	530	0	530	0	525	0	0	528.357	0.62553
11.284	0	525	0	527	0	530	0	530	0	530	0	530	0	530	0	530	0	530	0	525	0	525	0	530	0	530	0	525	0	0	528.357	0.62553
11.2949	0	525	0	527	0	530	0	530	0	530	0	530	0	530	0	530	0	530	0	525	0	525	0	530	0	530	0	525	0	0	528.357	0.62553
11.3057	0	525	0	527	0	530	0	530	0	530	0	530	0	530	0	530	0	530	0	525	0	525	0	530	0	530	0	525	0	0	528.357	0.62553
11.3166	0	525	0	527	0	530	0	530	0	530	0	530	0	530	0	530	0	530	0	525	0	525	0	530	0	530	0	525	0	0	528.357	0.62553
11.3274	0	525	0	527	0	530	0	530	0	530	0	530	0	530	0	530	0	530	0	525	0	525	0	530	0	530	0	525	0	0	528.357	0.62553
11.3383	0	525	0	527	0	530	0	530	0	530	0	530	0	530	0	530	0	530	0	525	0	525	0	530	0	530	0	525	0	0	528.357	0.62553
11.3492	0	525	0	527	0	530	0	530	0	530	0	530	0	530	0	530	0	530	0	525	0	525	0	530	0	530	0	525	0	0	528.357	0.62553
11.36	0	525	0	527	0	530	0	530	0	530	0	530	0	530	0	530	0	530	0	525	0	525	0	530	0	530	0	525	0	0	528.357	0.62553
11.3709	0	525	0	527	0	530	0	530	0	530	0	530	0	530	0	530	0	530	0	525	0	525	0	530	0	530	0	525	0	0	528.357	0.62553
11.3817	0	525	0	527	0	530	0	530	0	530	0	530	0	530	0	530	0	530	0	525	0	525	0	530	0	530	0	525	0	0	528.357	0.62553
11.3926	0	525	0	527	0	530	0	530	0	530	0	530	0	530	0	530	0	530	0	525	0	525	0	530	0	530	0	525	0	0	528.357	0.62553
11.4035	0	525	0	527	0	530	0	530	0	530	0	530	0	530	0	530	0	530	0	525	0	525	0	530	0	530	0	525	0	0	528.357	0.62553
11.4143	0	525	0	527	0	530	0	530	0	530	0	530	0	530	0	530	0	530	0	525	0	525	0	530	0	530	0	525	0	0	528.357	0.62553
11.4252	0	525	0	527	0	530	0	530	0	530	0	530	0	530	0	530	0	530	0	525	0	525	0	530	0	530	0	525	0	0	528.357	0.62553
11.436	0	525	0	527	0	530	0	530	0	530	0	530	0	530	0	530	0	530	0	525	0	525	0	530	0	530	0	525	0	0	528.357	0.62553
11.4469	0	525	0	527	0	530	0	530	0	530	0	530	0	530	0	530	0	530	0	525	0	525	0	530	0	530	0	525	0	0	528.357	0.62553
11.4578	0	525	0	527	0	530	0	530	0	530	0	530	0	530	0	530	0	530	0	525	0	525	0	530	0	530	0	525	0	0	528.357	0.62553
11.4686	0	525	0	527	0	530	0	530	0	530	0	530	0	530	0	530	0	530	0	525	0	525	0	530	0	530	0	525	0	0	528.357	0.62553
11.4795	0	525	0	527	0	530	0	530	0	530	0	530	0	530	0	530	0	530	0	525	0	525	0	530	0	530	0	525	0	0	528.357	0.62553
11.4903	0	525	0	527	0	530	0	530	0	530	0	530	0	530	0	530	0	530	0	525	0	525	0	530	0	530	0	525	0	0	528.357	0.62553
11.5012	0	525	0	527	0	530	0	530	0	530	0	530	0	530	0	530	0	530	0	525	0	525	0	530	0	530	0	525	0	0	528.357	0.62553
11.5121	0	525	0	527	0	530	0	530	0	530	0	530	0	530	0	530	0	530	0	525	0	525	0	530	0	530	0	525	0	0	528.357	0.62553
11.5229	0	525	0	527	0	530	0	530	0	530	0	530	0	530	0	530	0	530	0	525	0	525	0	530	0	530	0	525	0	0	528.357	0.62553
11.5338	0	525	0	527	0	530	0	530	0	530	0	530	0	530	0	530	0	530	0	525	0	525	0	530	0	530	0	525	0	0	528.357	0.62553
11.5446	0	525	0	527	0	530	0	530	0	530	0	530	0	530	0	530	0	530	0	525	0	525	0	530	0	530	0	525	0	0	528.357	0.62553
11.5555	0	525	0	527	0	530	0	530	0	530	0	530	0	530	0	530	0	530	0	525	0	525	0	530	0	530	0	525	0	0	528.357	0.62553
11.5664	0	525	0	527	0	530	0	530	0	530	0	530	0	530	0	530	0	530	0	525	0	525	0	530	0	530	0	525	0	0	528.357	0.62553
11.5772	0	525	0	527	0	530	0	530	0	530	0	530	0	530	0	530	0	530	0	525	0	525	0	530	0	530	0	525	0	0	528.357	0.62553
11.5881	0	525	0	527	0	530	0	530	0	530	0	530	0	530	0	530	0	530	0	525	0	525	0	530	0	530	0	525	0	0	528.357	0.62553
11.5989	0	525	0	527	0	530	0	530	0	530	0	530	0	530	0	530	0	530	0	525	0	525	0	530	0	530	0	525	0	0	528.357	0.62553
11.6098	0	525	0	527	0	530	0	530	0	530	0	530	0	530	0	530	0	530	0	525	0	525	0	530	0	530	0	525	0	0	528.357	0.62553
11.6207	0	525	0	527	0	530	0	530	0	530	0	530	0	530	0	530	0	530	0	525	0	525	0	530	0	530	0	525	0	0	528.357	0.62553
11.6315	0	525	0	527	0	530	0	530	0	530	0	530	0	530	0	530	0	530	0	525	0	525	0	530	0	530	0	525	0	0	528.357	0.62553
11.6424	0	525	0	527	0	530	0	530	0	530	0	530	0	530	0	530	0	530	0	525	0	525	0	530	0	530	0	525	0	0	528.357	0.62553
11.6532	0	525	0	527	0	530	0	530	0	530	0	530	0	530	0	530	0	530	0	525	0	525	0	530	0	530	0	525	0	0	528.357	0.62553
11.6641	0	525	0	527	0	530	0	530	0	530	0	530	0	530	0	530	0	530	0	525	0	525	0	530	0	530	0	525	0	0	528.357	0.62553
11.675	0	525	0	527	0	530	0	530	0	530	0	530	0	530	0	530	0	530	0	525	0	525	0	530	0	530	0	525	0	0	528.357	0.62553
11.6858	0	525	0	527	0	530	0	530	0	530	0	530	0	530	0	530	0	530	0	525	0	525	0	530	0	530	0	525	0	0	528.357	0.62553
11.6967	0	525	0	527	0	530	0	530	0	530	0	530	0	530	0	530	0	530	0	525	0	525	0	530	0	530	0	525	0	0	528.357	0.62553
11.7076	0	525	0	527	0	530	0	530	0	530	0	530	0	530	0	530	0	530	0	525	0	525	0	530	0	530	0	525	0	0	528.357	0.62553
11.7184	0	525	0	527	0	530	0	530	0	530	0	530	0	530	0	530	0	530	0	525	0	525	0	530	0	530	0	525	0	0	528.357	0.62553
11.7293	0	525	0	527	0	530	0	530	0	530	0	530	0	530	0	530	0	530	0	525	0	525	0	530	0	530	0	525	0	0	528.357	0.62553
11.7401	0	525	0	527	0	530	0	530	0	530	0	530	0	530	0	530	0	530	0	525	0	525	0	530	0	530	0	525	0	0	528.357	0.62553
11.751	0	525	0	527	0	530	0	530	0	530	0	530	0	530	0	530	0	530	0	525	0	525	0	530	0	530	0	525	0	0	528.357	0.62553
11.7619	0	525	0	527	0	530	0	530	0	530	0	530	0	530	0	530	0	530	0	525	0	525	0	530	0	530	0	525	0	0	528.357	0.62553
11.7727	0	525	0	527	0	530	0	530	0	530	0	530	0	530	0	530	0	530	0	525	0	525	0	530	0	530	0	525	0	0	528.357	0.62553
11.7836	0	525	0	527	0	530	0	530	0	530	0	530	0	530	0	530	0	530	0	525	0	525	0	530	0	530	0	525	0	0	528.357	0.62553
11.7944	0	525	0	527	0	530	0	530	0	530	0	530	0	530	0	530	0	530	0	525	0	525	0	530	0	530	0	525	0	0	528.357	0.62553
11.8053	0	525	0	527	0	530	0	530	0	530	0	530	0	530	0	530	0	530	0	525	0	525	0	530	0	530	0	525	0	0	528.357	0.62553
11.8162	0	525	0	527	0	530	0	530	0	530	0	530	0	530	0	530	0	530	0	525	0	525	0	530	0	530	0	525	0	0	528.357	0.62553
11.827	0	525	0	527	0	530	0	530	0	530	0	530	0	530	0	530	0	530	0	525	0	525	0	530	0	530	0	525	0	0	528.357	0.62553
11.8379	0	525	0	527	0	530	0	530	0	530	0	530	0	530	0	530	0	530	0	525	0	525	0	530	0	530	0	525	0	0	528.357	0.62553
11.8487	0	525	0	527	0	530	0	530	0	530	0	530	0	530	0	530	0	530	0	525	0	525	0	530	0	530	0	525	0	0	528.357	0.62553
11.8596	0	525	0	527	0	530	0	530	0	530	0	530	0	530	0	530	0	530	0	525	0	525	0	530	0	530	0	525	0	0	528.357	0.62553
11.8705	0	525	0	527	0	530	0	530	0	530	0	530	0	530	0	530	0	530	0	525	0	525	0	530	0	530	0	525	0	0	528.357	0.62553
11.8813	0	525	0	527	0	530	0	530	0	530	0	530	0	530	0	530	0	530	0	525	0	525	0	530	0	530	0	525	0	0	528.357	0.62553
11.8922	0	525	0	527	0	530	0	530	0	530	0	530	0	530	0	530	0	530	0	525	0	525	0	530	0	530	0	525	0	0	528.357	0.62553
11.903	0	525	0	527	0	530	0	530	0	530	0	530	0	530	0	530	0	530	0	525	0	525	0	530	0	530	0	525	0	0	528.357	0.62553
11.9139	0	525	0	527	0	530	0	530	0	530	0	530	0	530	0	530	0	530	0	525	0	525	0	530	0	530	0	525	0	0	528.357	0.62553
11.9248	0	525	0	527	0	530	0	530	0	530	0	530	0	530	0	530	0	530	0	525	0	525	0	530	0	530	0	525	0	0	528.357	0.62553
11.9356	0	525	0	527	0	530	0	530	0	530	0	530	0	530	0	530	0	530	0	525	0	525	0	530	0	530	0	525	0	0	528.357	0.62553
11.9465	0	525	0	527	0	530	0	530	0	530	0	530	0	530	0	530	0	530	0	525	0	525	0	530	0	530	0	525	0	0	528.357	0.62553
11.9573	0	525	0	527	0	530	0	530	0	530	0	530	0	530	0	530	0	530	0	525	0	525	0	530	0	530	0	525	0	0	528.357	0.62553
11.9682	0	525	0	527	0	530	0	530	0	530	0	530	0	530	0	530	0	530	0	525	0	525	0	530	0	530	0	525	0	0	528.357	0.62553
11.9791	0	525	0	527	0	530	0	530	0	530	0	530	0	530	0	530	0	530	0	525	0	525	0	530	0	530	0	525	0	0	528.357	0.62553
11.9899	0	525	0	527	0	530	0	530	0	530	0	530	0	530	0	530	0	530	0	525	0	525	0	530	0	530	0	525	0	0	528.357	0.62553
12.0008	0	525	0	527	0	530	0	530	0	530	0	530	0	530	0	530	0	530	0	525	0	525	0	530	0	530	0	525	0	0	528.357	0.62553
12.0116	0	525	0	527	0	530	0	530	0	530	0	530	0	530	0	530	0	530	0	525	0	525	0	530	0	530	0	525	0	0	528.357	0.62553
12.0225	0	525	0	527	0	530	0	530	0	530	0	530	0	530	0	530	0	530	0	525	0	525	0	530	0	530	0	525	0	0	528.357	0.62553
12.0334	0	525	0	527	0	530	0	530	0	530	0	530	0	530	0	530	0	530	0	525	0	525	0	530	0	530	0	525	0	0	528.357	0.62553
12.0442	0	525	0	527	0	530	0	530	0	530	0	530	0	530	0	530	0	530	0	525	0	525	0	530	0	530	0	525	0	0	528.357	0.62553
12.0551	0	525	0	527	0	530	0	530	0	530	0	530	0	530	0	530	0	530	0	525	0	525	0	530	0	530	0	525	0	0	528.357	0.62553
12.0659	0	525	0	527	0	530	0	530	0	530	0	530	0	530	0	530	0	530	0	525	0	525	0	530	0	530	0	525	0	0	528.357	0.62553
12.0768	0	525	0	527	0	530	0	530	0	530	0	530	0	530	0	530	0	530	0	525	0	525	0	530	0	530	0	525	0	0	528.357	0.62553
12.0877	0	525	0	527	0	530	0	530	0	530	0	530	0	530	0	530	0	530	0	525	0	525	0	530	0	530	0	525	0	0	528.357	0.62553
12.0985	0	525	0	527	0	530	0	530	0	530	0	530	0	530	0	530	0	530	0	525	0	525	0	530	0	530	0	525	0	0	528.357	0.62553
12.1094	0	525	0	527	0	530	0	530	0	530	0	530	0	530	0	530	0	530	0	525	0	525	0	530	0	530	0	525	0	0	528.357	0.62553
12.1202	0	525	0	527	0	530	0	530	0	530	0	530	0	530	0	530	0	530	0	525	0	525	0	530	0	530	0	525	0	0	528.357	0.62553
12.1311	0	525	0	527	0	530	0	530	0	530	0	530	0	530	0	530	0	530	0	525	0	525	0	530	0	530	0	525	0	0	528.357	0.62553
12.142	0	525	0	527	0	530	0	530	0	530	0	530	0	530	0	530	0	530	0	525	0	525	0	530	0	530	0	525	0	0	528.357	0.62553
12.1528	0	525	0	527	0	530	0	530	0	530	0	530	0	530	0	530	0	530	0	525	0	525	0	530	0	530	0	525	0	0	528.357	0.62553
12.1637	0	525	0	527	0	530	0	530	0	530	0	530	0	530	0	530	0	530	0	525	0	525	0	530	0	530	0	525	0	0	528.357	0.62553
12.1745	0	525	0	527	0	530	0	530	0	530	0	530	0	530	0	530	0	530	0	525	0	525	0	530	0	530	0	525	0	0	528.357	0.62553
12.1854	0	525	0	527	0	530	0	530	0	530	0	530	0	530	0	530	0	530	0	525	0	525	0	530	0	530	0	525	0	0	528.357	0.62553
12.1963	0	525	0	527	0	530	0	530	0	530	0	530	0	530	0	530	0	530	0	525	0	525	0	530	0	530	0	525	0	0	528.357	0.62553
12.2071	0	525	0	527	0	530	0	530	0	530	0	530	0	530	0	530	0	530	0	525	0	525	0	530	0	530	0	525	0	0	528.357	0.62553
12.218	0	525	0	527	0	530	0	530	0	530	0	530	0	530	0	530	0	530	0	525	0	525	0	530	0	530	0	525	0	0	528.357	0.62553
12.2289	0	525	0	527	0	530	0	530	0	530	0	530	0	530	0	530	0	530	0	525	0	525	0	530	0	530	0	525	0	0	528.357	0.62553
12.2397	0	525	0	527	0	530	0	530	0	530	0	530	0	530	0	530	0	530	0	525	0	525	0	530	0	530	0	525	0	0	528.357	0.62553
12.2506	0	525	0	527	0	530	0	530	0	530	0	530	0	530	0	530	0	530	0	525	0	525	0	530	0	530	0	525	0	0	528.357	0.62553
12.2614	0	525	0	527	0	530	0	530	0	530	0	530	0	530	0	530	0	530	0	525	0	525	0	530	0	530	0	525	0	0	528.357	0.62553
12.2723	0	525	0	527	0	530	0	530	0	530	0	530	0	530	0	530	0	530	0	525	0	525	0	530	0	530	0	525	0	0	528.357	0.62553
12.2832	0	525	0	527	0	530	0	530	0	530	0	530	0	530	0	530	0	530	0	525	0	525	0	530	0	530	0	525	0	0	528.357	0.62553
12.294	0	525	0	527	0	530	0	530	0	530	0	530	0	530	0	530	0	530	0	525	0	525	0	530	0	530	0	525	0	0	528.357	0.62553
12.3049	0	525	0	527	0	530	0	530	0	530	0	530	0	530	0	530	0	530	0	525	0	525	0	530	0	530	0	525	0	0	528.357	0.62553
12.3157	0	525	0	527	0	530	0	530	0	530	0	530	0	530	0	530	0	530	0	525	0	525	0	530	0	530	0	525	0	0	528.357	0.62553
12.3266	0	525	0	527	0	530	0	530	0	530	0	530	0	530	0	530	0	530	0	525	0	525	0	530	0	530	0	525	0	0	528.357	0.62553
12.3375	0	525	0	527	0	530	0	530	0	530	0	530	0	530	0	530	0	530	0	525	0	525	0	530	0	530	0	525	0	0	528.357	0.62553
12.3483	0	525	0	527	0	530	0	530	0	530	0	530	0	530	0	530	0	530	0	525	0	525	0	530	0	530	0	525	0	0	528.357	0.62553
12.3592	0	525	0	527	0	530	0	530	0	530	0	530	0	530	0	530	0	530	0	525	0	525	0	530	0	530	0	525	0	0	528.357	0.62553
12.37	0	525	0	527	0	530	0	530	0	530	0	530	0	530	0	530	0	530	0	525	0	525	0	530	0	530	0	525	0	0	528.357	0.62553
12.3809	0	525	0	527	0	530	0	530	0	530	0	530	0	530	0	530	0	530	0	525	0	525	0	530	0	530	0	525	0	0	528.357	0.62553
12.3918	0	525	0	527	0	530	0	530	0	530	0	530	0	530	0	530	0	530	0	525	0	525	0	530	0	530	0	525	0	0	528.357	0.62553
12.4026	0	525	0	527	0	530	0	530	0	530	0	530	0	530	0	530	0	530	0	525	0	525	0	530	0	530	0	525	0	0	528.357	0.62553
12.4135	0	525	0	527	0	530	0	530	0	530	0	530	0	530	0	530	0	530	0	525	0	525	0	530	0	530	0	525	0	0	528.357	0.62553
12.4243	0	525	0	527	0	530	0	530	0	530	0	530	0	530	0	530	0	530	0	525	0	525	0	530	0	530	0	525	0	0	528.357	0.62553
12.4352	0	525	0	527	0	530	0	530	0	530	0	530	0	530	0	530	0	530	0	525	0	525	0	530	0	530	0	525	0	0	528.357	0.62553
12.4461	0	525	0	527	0	530	0	530	0	530	0	530	0	530	0	530	0	530	0	525	0	525	0	530	0	530	0	525	0	0	528.357	0.62553
12.4569	0	525	0	527	0	530	0	530	0	530	0	530	0	530	0	530	0	530	0	525	0	525	0	530	0	530	0	525	0	0	528.357	0.62553
12.4678	0	525	0	527	0	530	0	530	0	530	0	530	0	530	0	530	0	530	0	525	0	525	0	530	0	530	0	525	0	0	528.357	0.62553
12.4786	0	525	0	527	0	530	0	530	0	530	0	530	0	530	0	530	0	530	0	525	0	525	0	530	0	530	0	525	0	0	528.357	0.62553
12.4895	0	525	0	527	0	530	0	530	0	530	0	530	0	530	0	530	0	530	0	525	0	525	0	530	0	530	0	525	0	0	528.357	0.62553
12.5004	0	525	0	527	0	530	0	530	0	530	0	530	0	530	0	530	0	530	0	525	0	525	0	530	0	530	0	525	0	0	528.357	0.62553
12.5112	0	525	0	527	0	530	0	530	0	530	0	530	0	530	0	530	0	530	0	525	0	525	0	530	0	530	0	525	0	0	528.357	0.62553
12.5221	0	525	0	527	0	530	0	530	0	530	0	530	0	530	0	530	0	530	0	525	0	525	0	530	0	530	0	525	0	0	528.357	0.62553
12.5329	0	525	0	527	0	530	0	530	0	530	0	530	0	530	0	530	0	530	0	525	0	525	0	530	0	530	0	525	0	0	528.357	0.62553
12.5438	0	525	0	527	0	530	0	530	0	530	0	530	0	530	0	530	0	530	0	525	0	525	0	530	0	530	0	525	0	0	528.357	0.62553
12.5547	0	525	0	527	0	530	0	530	0	530	0	530	0	530	0	530	0	530	0	525	0	525	0	530	0	530	0	525	0	0	528.357	0.62553
12.5655	0	525	0	527	0	530	0	530	0	530	0	530	0	530	0	530	0	530	0	525	0	525	0	530	0	530	0	525	0	0	528.357	0.62553
12.5764	0	525	0	527	0	530	0	530	0	530	0	530	0	530	0	530	0	530	0	525	0	525	0	530	0	530	0	525	0	0	528.357	0.62553
12.5872	0	525	0	527	0	530	0	530	0	530	0	530	0	530	0	530	0	530	0	525	0	525	0	530	0	530	0	525	0	0	528.357	0.62553
12.5981	0	525	0	527	0	530	0	530	0	530	0	530	0	530	0	530	0	530	0	525	0	525	0	530	0	530	0	525	0	0	528.357	0.62553
12.609	0	525	0	527	0	530	0	530	0	530	0	530	0	530	0	530	0	530	0	525	0	525	0	530	0	530	0	525	0	0	528.357	0.62553
12.6198	0	525	0	527	0	530	0	530	0	530	0	530	0	530	0	530	0	530	0	525	0	525	0	530	0	530	0	525	0	0	528.357	0.62553
12.6307	0	525	0	527	0	530	0	530	0	530	0	530	0	530	0	530	0	530	0	525	0	525	0	530	0	530	0	525	0	0	528.357	0.62553
12.6415	0	525	0	527	0	530	0	530	0	530	0	530	0	530	0	530	0	530	0	525	0	525	0	530	0	530	0	525	0	0	528.357	0.62553
12.6524	0	525	0	527	0	530	0	530	0	530	0	530	0	530	0	530	0	530	0	525	0	525	0	530	0	530	0	525	0	0	528.357	0.62553
12.6633	0	525	0	527	0	530	0	530	0	530	0	530	0	530	0	530	0	530	0	525	0	525	0	530	0	530	0	525	0	0	528.357	0.62553
12.6741	0	525	0	527	0	530	0	530	0	530	0	530	0	530	0	530	0	530	0	525	0	525	0	530	0	530	0	525	0	0	528.357	0.62553
12.685	0	525	0	527	0	530	0	530	0	530	0	530	0	530	0	530	0	530	0	525	0	525	0	530	0	530	0	525	0	0	528.357	0.62553
12.6958	0	525	0	527	0	530	0	530	0	530	0	530	0	530	0	530	0	530	0	525	0	525	0	530	0	530	0	525	0	0	528.357	0.62553
12.7067	0	525	0	527	0	530	0	530	0	530	0	530	0	530	0	530	0	530	0	525	0	525	0	530	0	530	0	525	0	0	528.357	0.62553
12.7176	0	525	0	527	0	530	0	530	0	530	0	530	0	530	0	530	0	530	0	525	0	525	0	530	0	530	0	525	0	0	528.357	0.62553
12.7284	0	525	0	527	0	530	0	530	0	530	0	530	0	530	0	530	0	530	0	525	0	525	0	530	0	530	0	525	0	0	528.357	0.62553
12.7393	0	525	0	527	0	530	0	530	0	530	0	530	0	530	0	530	0	530	0	525	0	525	0	530	0	530	0	525	0	0	528.357	0.62553
12.7502	0	525	0	527	0	530	0	530	0	530	0	530	0	530	0	530	0	530	0	525	0	525	0	530	0	530	0	525	0	0	528.357	0.62553
12.761	0	525	0	527	0	530	0	530	0	530	0	530	0	530	0	530	0	530	0	525	0	525	0	530	0	530	0	525	0	0	528.357	0.62553
12.7719	0	525	0	527	0	530	0	530	0	530	0	530	0	530	0	530	0	530	0	525	0	525	0	530	0	530	0	525	0	0	528.357	0.62553
12.7827	0	525	0	527	0	530	0	530	0	530	0	530	0	530	0	530	0	530	0	525	0	525	0	530	0	530	0	525	0	0	528.357	0.62553
12.7936	0	525	0	527	0	530	0	530	0	530	0	530	0	530	0	530	0	530	0	525	0	525	0	530	0	530	0	525	0	0	528.357	0.62553
12.8045	0	525	0	527	0	530	0	530	0	530	0	530	0	530	0	530	0	530	0	525	0	525	0	530	0	530	0	525	0	0	528.357	0.62553
12.8153	0	525	0	527	0	530	0	530	0	530	0	530	0	530	0	530	0	530	0	525	0	525	0	530	0	530	0	525	0	0	528.357	0.62553
12.8262	0	525	0	527	0	530	0	530	0	530	0	530	0	530	0	530	0	530	0	525	0	525	0	530	0	530	0	525	0	0	528.357	0.62553
12.837	0	525	0	527	0	530	0	530	0	530	0	530	0	530	0	530	0	530	0	525	0	525	0	530	0	530	0	525	0	0	528.357	0.62553
12.8479	0	525	0	527	0	530	0	530	0	530	0	530	0	530	0	530	0	530	0	525	0	525	0	530	0	530	0	525	0	0	528.357	0.62553
12.8588	0	525	0	527	0	530	0	530	0	530	0	530	0	530	0	530	0	530	0	525	0	525	0	530	0	530	0	525	0	0	528.357	0.62553
12.8696	0	525	0	527	0	530	0	530	0	530	0	530	0	530	0	530	0	530	0	525	0	525	0	530	0	530	0	525	0	0	528.357	0.62553
12.8805	0	525	0	527	0	530	0	530	0	530	0	530	0	530	0	530	0	530	0	525	0	525	0	530	0	530	0	525	0	0	528.357	0.62553
12.8913	0	525	0	527	0	530	0	530	0	530	0	530	0	530	0	530	0	530	0	525	0	525	0	530	0	530	0	525	0	0	528.357	0.62553
12.9022	0	525	0	527	0	530	0	530	0	530	0	530	0	530	0	530	0	530	0	525	0	525	0	530	0	530	0	525	0	0	528.357	0.62553
12.9131	0	525	0	527	0	530	0	530	0	530	0	530	0	530	0	530	0	530	0	525	0	525	0	530	0	530	0	525	0	0	528.357	0.62553
12.9239	0	525	0	527	0	530	0	530	0	530	0	530	0	530	0	530	0	530	0	525	0	525	0	530	0	530	0	525	0	0	528.357	0.62553
12.9348	0	525	0	527	0	530	0	530	0	530	0	530	0	530	0	530	0	530	0	525	0	525	0	530	0	530	0	525	0	0	528.357	0.62553
12.9456	0	525	0	527	0	530	0	530	0	530	0	530	0	530	0	530	0	530	0	525	0	525	0	530	0	530	0	525	0	0	528.357	0.62553
12.9565	0	525	0	527	0	530	0	530	0	530	0	530	0	530	0	530	0	530	0	525	0	525	0	530	0	530	0	525	0	0	528.357	0.62553
12.9674	0	525	0	527	0	530	0	530	0	530	0	530	0	530	0	530	0	530	0	525	0	525	0	530	0	530	0	525	0	0	528.357	0.62553
12.9782	0	525	0	527	0	530	0	530	0	530	0	530	0	530	0	530	0	530	0	525	0	525	0	530	0	530	0	525	0	0	528.357	0.62553
12.9891	0	525	0	527	0	530	0	530	0	530	0	530	0	530	0	530	0	530	0	525	0	525	0	530	0	530	0	525	0	0	528.357	0.62553
12.9999	0	525	0	527	0	530	0	530	0	530	0	530	0	530	0	530	0	530	0	525	0	525	0	530	0	530	0	525	0	0	528.357	0.62553
13.0108	0	525	0	527	0	530	0	530	0	530	0	530	0	530	0	530	0	530	0	525	0	525	0	530	0	530	0	525	0	0	528.357	0.62553
13.0217	0	525	0	527	0	530	0	530	0	530	0	530	0	530	0	530	0	530	0	525	0	525	0	530	0	530	0	525	0	0	528.357	0.62553
13.0325	0	525	0	527	0	530	0	530	0	530	0	530	0	530	0	530	0	530	0	525	0	525	0	530	0	530	0	525	0	0	528.357	0.62553
13.0434	0	525	0	527	0	530	0	530	0	530	0	530	0	530	0	530	0	530	0	525	0	525	0	530	0	530	0	525	0	0	528.357	0.62553
13.0542	0	525	0	527	0	530	0	530	0	530	0	530	0	530	0	530	0	530	0	525	0	525	0	530	0	530	0	525	0	0	528.357	0.62553
13.0651	0	525	0	527	0	530	0	530	0	530	0	530	0	530	0	530	0	530	0	525	0	525	0	530	0	530	0	525	0	0	528.357	0.62553
13.076	0	525	0	527	0	530	0	530	0	530	0	530	0	530	0	530	0	530	0	525	0	525	0	530	0	530	0	525	0	0	528.357	0.62553
13.0868	0	525	0	527	0	530	0	530	0	530	0	530	0	530	0	530	0	530	0	525	0	525	0	530	0	530	0	525	0	0	528.357	0.62553
13.0977	0	525	0	527	0	530	0	530	0	530	0	530	0	530	0	530	0	530	0	525	0	525	0	530	0	530	0	525	0	0	528.357	0.62553
13.1085	0	525	0	527	0	530	0	530	0	530	0	530	0	530	0	530	0	530	0	525	0	525	0	530	0	530	0	525	0	0	528.357	0.62553
13.1194	0	525	0	527	0	530	0	530	0	530	0	530	0	530	0	530	0	530	0	525	0	525	0	530	0	530	0	525	0	0	528.357	0.62553
13.1303	0	525	0	527	0	530	0	530	0	530	0	530	0	530	0	530	0	530	0	525	0	525	0	530	0	530	0	525	0	0	528.357	0.62553
13.1411	0	525	0	527	0	530	0	530	0	530	0	530	0	530	0	530	0	530	0	525	0	525	0	530	0	530	0	525	0	0	528.357	0.62553
13.152	0	525	0	527	0	530	0	530	0	530	0	530	0	530	0	530	0	530	0	525	0	525	0	530	0	530	0	525	0	0	528.357	0.62553
13.1628	0	525	0	527	0	530	0	530	0	530	0	530	0	530	0	530	0	530	0	525	0	525	0	530	0	530	0	525	0	0	528.357	0.62553
13.1737	0	525	0	527	0	530	0	530	0	530	0	530	0	530	0	530	0	530	0	525	0	525	0	530	0	530	0	525	0	0	528.357	0.62553
13.1846	0	525	0	527	0	530	0	530	0	530	0	530	0	530	0	530	0	530	0	525	0	525	0	530	0	530	0	525	0	0	528.357	0.62553
13.1954	0	525	0	527	0	530	0	530	0	530	0	530	0	530	0	530	0	530	0	525	0	525	0	530	0	530	0	525	0	0	528.357	0.62553
13.2063	0	525	0	527	0	530	0	530	0	530	0	530	0	530	0	530	0	530	0	525	0	525	0	530	0	530	0	525	0	0	528.357	0.62553
13.2172	0	525	0	527	0	530	0	530	0	530	0	530	0	530	0	530	0	530	0	525	0	525	0	530	0	530	0	525	0	0	528.357	0.62553
13.228	0	525	0	527	0	530	0	530	0	530	0	530	0	530	0	530	0	530	0	525	0	525	0	530	0	530	0	525	0	0	528.357	0.62553
13.2389	0	525	0	527	0	530	0	530	0	530	0	530	0	530	0	530	0	530	0	525	0	525	0	530	0	530	0	525	0	0	528.357	0.62553
13.2497	0	525	0	527	0	530	0	530	0	530	0	530	0	530	0	530	0	530	0	525	0	525	0	530	0	530	0	525	0	0	528.357	0.62553
13.2606	0	525	0	527	0	530	0	530	0	530	0	530	0	530	0	530	0	530	0	525	0	525	0	530	0	530	0	525	0	0	528.357	0.62553
13.2715	0	525	0	527	0	530	0	530	0	530	0	530	0	530	0	530	0	530	0	525	0	525	0	530	0	530	0	525	0	0	528.357	0.62553
13.2823	0	525	0	527	0	530	0	530	0	530	0	530	0	530	0	530	0	530	0	525	0	525	0	530	0	530	0	525	0	0	528.357	0.62553
13.2932	0	525	0	527	0	530	0	530	0	530	0	530	0	530	0	530	0	530	0	525	0	525	0	530	0	530	0	525	0	0	528.357	0.62553
13.304	0	525	0	527	0	530	0	530	0	530	0	530	0	530	0	530	0	530	0	525	0	525	0	530	0	530	0	525	0	0	528.357	0.62553
13.3149	0	525	0	527	0	530	0	530	0	530	0	530	0	530	0	530	0	530	0	525	0	525	0	530	0	530	0	525	0	0	528.357	0.62553
13.3258	0	525	0	527	0	530	0	530	0	530	0	530	0	530	0	530	0	530	0	525	0	525	0	530	0	530	0	525	0	0	528.357	0.62553
13.3366	0	525	0	527	0	530	0	530	0	530	0	530	0	530	0	530	0	530	0	525	0	525	0	530	0	530	0	525	0	0	528.357	0.62553
13.3475	0	525	0	527	0	530	0	530	0	530	0	530	0	530	0	530	0	530	0	525	0	525	0	530	0	530	0	525	0	0	528.357	0.62553
13.3583	0	525	0	527	0	530	0	530	0	530	0	530	0	530	0	530	0	530	0	525	0	525	0	530	0	530	0	525	0	0	528.357	0.62553
13.3692	0	525	0	527	0	530	0	530	0	530	0	530	0	530	0	530	0	530	0	525	0	525	0	530	0	530	0	525	0	0	528.357	0.62553
13.3801	0	525	0	527	0	530	0	530	0	530	0	530	0	530	0	530	0	530	0	525	0	525	0	530	0	530	0	525	0	0	528.357	0.62553
13.3909	0	525	0	527	0	530	0	530	0	530	0	530	0	530	0	530	0	530	0	525	0	525	0	530	0	530	0	525	0	0	528.357	0.62553
13.4018	0	525	0	527	0	530	0	530	0	530	0	530	0	530	0	530	0	530	0	525	0	525	0	530	0	530	0	525	0	0	528.357	0.62553
13.4126	0	525	0	527	0	530	0	530	0	530	0	530	0	530	0	530	0	530	0	525	0	525	0	530	0	530	0	525	0	0	528.357	0.62553
13.4235	0	525	0	527	0	530	0	530	0	530	0	530	0	530	0	530	0	530	0	525	0	525	0	530	0	530	0	525	0	0	528.357	0.62553
13.4344	0	525	0	527	0	530	0	530	0	530	0	530	0	530	0	530	0	530	0	525	0	525	0	530	0	530	0	525	0	0	528.357	0.62553
13.4452	0	525	0	527	0	530	0	530	0	530	0	530	0	530	0	530	0	530	0	525	0	525	0	530	0	530	0	525	0	0	528.357	0.62553
13.4561	0	525	0	527	0	530	0	530	0	530	0	530	0	530	0	530	0	530	0	525	0	525	0	530	0	530	0	525	0	0	528.357	0.62553
13.4669	0	525	0	527	0	530	0	530	0	530	0	530	0	530	0	530	0	530	0	525	0	525	0	530	0	530	0	525	0	0	528.357	0.62553
13.4778	0	525	0	527	0	530	0	530	0	530	0	530	0	530	0	530	0	530	0	525	0	525	0	530	0	530	0	525	0	0	528.357	0.62553
13.4887	0	525	0	527	0	530	0	530	0	530	0	530	0	530	0	530	0	530	0	525	0	525	0	530	0	530	0	525	0	0	528.357	0.62553
13.4995	0	525	0	527	0	530	0	530	0	530	0	530	0	530	0	530	0	530	0	525	0	525	0	530	0	530	0	525	0	0	528.357	0.62553
13.5104	0	525	0	527	0	530	0	530	0	530	0	530	0	530	0	530	0	530	0	525	0	525	0	530	0	530	0	525	0	0	528.357	0.62553
13.5212	0	525	0	527	0	530	0	530	0	530	0	530	0	530	0	530	0	530	0	525	0	525	0	530	0	530	0	525	0	0	528.357	0.62553
13.5321	0	525	0	527	0	530	0	530	0	530	0	530	0	530	0	530	0	530	0	525	0	525	0	530	0	530	0	525	0	0	528.357	0.62553
13.543	0	525	0	527	0	530	0	530	0	530	0	530	0	530	0	530	0	530	0	525	0	525	0	530	0	530	0	525	0	0	528.357	0.62553
13.5538	0	525	0	527	0	530	0	530	0	530	0	530	0	530	0	530	0	530	0	525	0	525	0	530	0	530	0	525	0	0	528.357	0.62553
13.5647	0	525	0	527	0	530	0	530	0	530	0	530	0	530	0	530	0	530	0	525	0	525	0	530	0	530	0	525	0	0	528.357	0.62553
13.5755	0	525	0	527	0	530	0	530	0	530	0	530	0	530	0	530	0	530	0	525	0	525	0	530	0	530	0	525	0	0	528.357	0.62553
13.5864	0	525	0	527	0	530	0	530	0	530	0	530	0	530	0	530	0	530	0	525	0	525	0	530	0	530	0	525	0	0	528.357	0.62553
13.5973	0	525	0	527	0	530	0	530	0	530	0	530	0	530	0	530	0	530	0	525	0	525	0	530	0	530	0	525	0	0	528.357	0.62553
13.6081	0	525	0	527	0	530	0	530	0	530	0	530	0	530	0	530	0	530	0	525	0	525	0	530	0	530	0	525	0	0	528.357	0.62553
13.619	0	525	0	527	0	530	0	530	0	530	0	530	0	530	0	530	0	530	0	525	0	525	0	530	0	530	0	525	0	0	528.357	0.62553
13.6298	0	525	0	527	0	530	0	530	0	530	0	530	0	530	0	530	0	530	0	525	0	525	0	530	0	530	0	525	0	0	528.357	0.62553
13.6407	0	525	0	527	0	530	0	530	0	530	0	530	0	530	0	530	0	530	0	525	0	525	0	530	0	530	0	525	0	0	528.357	0.62553
13.6516	0	525	0	527	0	530	0	530	0	530	0	530	0	530	0	530	0	530	0	525	0	525	0	530	0	530	0	525	0	0	528.357	0.62553
13.6624	0	525	0	527	0	530	0	530	0	530	0	530	0	530	0	530	0	530	0	525	0	525	0	530	0	530	0	525	0	0	528.357	0.62553
13.6733	0	525	0	527	0	530	0	530	0	530	0	530	0	530	0	530	0	530	0	525	0	525	0	530	0	530	0	525	0	0	528.357	0.62553
13.6841	0	525	0	527	0	530	0	530	0	530	0	530	0	530	0	530	0	530	0	525	0	525	0	530	0	530	0	525	0	0	528.357	0.62553
13.695	0	525	0	527	0	530	0	530	0	530	0	530	0	530	0	530	0	530	0	525	0	525	0	530	0	530	0	525	0	0	528.357	0.62553
13.7059	0	525	0	527	0	530	0	530	0	530	0	530	0	530	0	530	0	530	0	525	0	525	0	530	0	530	0	525	0	0	528.357	0.62553
13.7167	0	525	0	527	0	530	0	530	0	530	0	530	0	530	0	530	0	530	0	525	0	525	0	530	0	530	0	525	0	0	528.357	0.62553
13.7276	0	525	0	527	0	530	0	530	0	530	0	530	0	530	0	530	0	530	0	525	0	525	0	530	0	530	0	525	0	0	528.357	0.62553
13.7385	0	525	0	527	0	530	0	530	0	530	0	530	0	530	0	530	0	530	0	525	0	525	0	530	0	530	0	525	0	0	528.357	0.62553
13.7493	0	525	0	527	0	530	0	530	0	530	0	530	0	530	0	530	0	530	0	525	0	525	0	530	0	530	0	525	0	0	528.357	0.62553
13.7602	0	525	0	527	0	530	0	530	0	530	0	530	0	530	0	530	0	530	0	525	0	525	0	530	0	530	0	525	0	0	528.357	0.62553
13.771	0	525	0	527	0	530	0	530	0	530	0	530	0	530	0	530	0	530	0	525	0	525	0	530	0	530	0	525	0	0	528.357	0.62553
13.7819	0	525	0	527	0	530	0	530	0	530	0	530	0	530	0	530	0	530	0	525	0	525	0	530	0	530	0	525	0	0	528.357	0.62553
13.7928	0	525	0	527	0	530	0	530	0	530	0	530	0	530	0	530	0	530	0	525	0	525	0	530	0	530	0	525	0	0	528.357	0.62553
13.8036	0	525	0	527	0	530	0	530	0	530	0	530	0	530	0	530	0	530	0	525	0	525	0	530	0	530	0	525	0	0	528.357	0.62553
13.8145	0	525	0	527	0	530	0	530	0	530	0	530	0	530	0	530	0	530	0	525	0	525	0	530	0	530	0	525	0	0	528.357	0.62553
13.8253	0	525	0	527	0	530	0	530	0	530	0	530	0	530	0	530	0	530	0	525	0	525	0	530	0	530	0	525	0	0	528.357	0.62553
13.8362	0	525	0	527	0	530	0	530	0	530	0	530	0	530	0	530	0	530	0	525	0	525	0	530	0	530	0	525	0	0	528.357	0.62553
13.8471	0	525	0	527	0	530	0	530	0	530	0	530	0	530	0	530	0	530	0	525	0	525	0	530	0	530	0	525	0	0	528.357	0.62553
13.8579	0	525	0	527	0	530	0	530	0	530	0	530	0	530	0	530	0	530	0	525	0	525	0	530	0	530	0	525	0	0	528.357	0.62553
13.8688	0	525	0	527	0	530	0	530	0	530	0	530	0	530	0	530	0	530	0	525	0	525	0	530	0	530	0	525	0	0	528.357	0.62553
13.8796	0	525	0	527	0	530	0	530	0	530	0	530	0	530	0	530	0	530	0	525	0	525	0	530	0	530	0	525	0	0	528.357	0.62553
13.8905	0	525	0	527	0	530	0	530	0	530	0	530	0	530	0	530	0	530	0	525	0	525	0	530	0	530	0	525	0	0	528.357	0.62553
13.9014	0	525	0	527	0	530	0	530	0	530	0	530	0	530	0	530	0	530	0	525	0	525	0	530	0	530	0	525	0	0	528.357	0.62553
13.9122	0	525	0	527	0	530	0	530	0	530	0	530	0	530	0	530	0	530	0	525	0	525	0	530	0	530	0	525	0	0	528.357	0.62553
13.9231	0	525	0	527	0	530	0	530	0	530	0	530	0	530	0	530	0	530	0	525	0	525	0	530	0	530	0	525	0	0	528.357	0.62553
13.9339	0	525	0	527	0	530	0	530	0	530	0	530	0	530	0	530	0	530	0	525	0	525	0	530	0	530	0	525	0	0	528.357	0.62553
13.9448	0	525	0	527	0	530	0	530	0	530	0	530	0	530	0	530	0	530	0	525	0	525	0	530	0	530	0	525	0	0	528.357	0.62553
13.9557	0	525	0	527	0	530	0	530	0	530	0	530	0	530	0	530	0	530	0	525	0	525	0	530	0	530	0	525	0	0	528.357	0.62553
13.9665	0	525	0	527	0	530	0	530	0	530	0	530	0	530	0	530	0	530	0	525	0	525	0	530	0	530	0	525	0	0	528.357	0.62553
13.9774	0	525	0	527	0	530	0	530	0	530	0	530	0	530	0	530	0	530	0	525	0	525	0	530	0	530	0	525	0	0	528.357	0.62553
13.9882	0	525	0	527	0	530	0	530	0	530	0	530	0	530	0	530	0	530	0	525	0	525	0	530	0	530	0	525	0	0	528.357	0.62553
13.9991	0	525	0	527	0	530	0	530	0	530	0	530	0	530	0	530	0	530	0	525	0	525	0	530	0	530	0	525	0	0	528.357	0.62553
14.01	0	525	0	527	0	530	0	530	0	530	0	530	0	530	0	530	0	530	0	525	0	525	0	530	0	530	0	525	0	0	528.357	0.62553
14.0208	0	525	0	527	0	530	0	530	0	530	0	530	0	530	0	530	0	530	0	525	0	525	0	530	0	530	0	525	0	0	528.357	0.62553
14.0317	0	525	0	527	0	530	0	530	0	530	0	530	0	530	0	530	0	530	0	525	0	525	0	530	0	530	0	525	0	0	528.357	0.62553
14.0425	0	525	0	527	0	530	0	530	0	530	0	530	0	530	0	530	0	530	0	525	0	525	0	530	0	530	0	525	0	0	528.357	0.62553
14.0534	0	525	0	527	0	530	0	530	0	530	0	530	0	530	0	530	0	530	0	525	0	525	0	530	0	530	0	525	0	0	528.357	0.62553
14.0643	0	525	0	527	0	530	0	530	0	530	0	530	0	530	0	530	0	530	0	525	0	525	0	530	0	530	0	525	0	0	528.357	0.62553
14.0751	0	525	0	527	0	530	0	530	0	530	0	530	0	530	0	530	0	530	0	525	0	525	0	530	0	530	0	525	0	0	528.357	0.62553
14.086	0	525	0	527	0	530	0	530	0	530	0	530	0	530	0	530	0	530	0	525	0	525	0	530	0	530	0	525	0	0	528.357	0.62553
14.0968	0	525	0	527	0	530	0	530	0	530	0	530	0	530	0	530	0	530	0	525	0	525	0	530	0	530	0	525	0	0	528.357	0.62553
14.1077	0	525	0	527	0	530	0	530	0	530	0	530	0	530	0	530	0	530	0	525	0	525	0	530	0	530	0	525	0	0	528.357	0.62553
14.1186	0	525	0	527	0	530	0	530	0	530	0	530	0	530	0	530	0	530	0	525	0	525	0	530	0	530	0	525	0	0	528.357	0.62553
14.1294	0	525	0	527	0	530	0	530	0	530	0	530	0	530	0	530	0	530	0	525	0	525	0	530	0	530	0	525	0	0	528.357	0.62553
14.1403	0	525	0	527	0	530	0	530	0	530	0	530	0	530	0	530	0	530	0	525	0	525	0	530	0	530	0	525	0	0	528.357	0.62553
14.1511	0	525	0	527	0	530	0	530	0	530	0	530	0	530	0	530	0	530	0	525	0	525	0	530	0	530	0	525	0	0	528.357	0.62553
14.162	0	525	0	527	0	530	0	530	0	530	0	530	0	530	0	530	0	530	0	525	0	525	0	530	0	530	0	525	0	0	528.357	0.62553
14.1729	0	525	0	527	0	530	0	530	0	530	0	530	0	530	0	530	0	530	0	525	0	525	0	530	0	530	0	525	0	0	528.357	0.62553
14.1837	0	525	0	527	0	530	0	530	0	530	0	530	0	530	0	530	0	530	0	525	0	525	0	530	0	530	0	525	0	0	528.357	0.62553
14.1946	0	525	0	527	0	530	0	530	0	530	0	530	0	530	0	530	0	530	0	525	0	525	0	530	0	530	0	525	0	0	528.357	0.62553
14.2055	0	525	0	527	0	530	0	530	0	530	0	530	0	530	0	530	0	530	0	525	0	525	0	530	0	530	0	525	0	0	528.357	0.62553
14.2163	0	525	0	527	0	530	0	530	0	530	0	530	0	530	0	530	0	530	0	525	0	525	0	530	0	530	0	525	0	0	528.357	0.62553
14.2272	0	525	0	527	0	530	0	530	0	530	0	530	0	530	0	530	0	530	0	525	0	525	0	530	0	530	0	525	0	0	528.357	0.62553
14.238	0	525	0	527	0	530	0	530	0	530	0	530	0	530	0	530	0	530	0	525	0	525	0	530	0	530	0	525	0	0	528.357	0.62553
14.2489	0	525	0	527	0	530	0	530	0	530	0	530	0	530	0	530	0	530	0	525	0	525	0	530	0	530	0	525	0	0	528.357	0.62553
14.2598	0	525	0	527	0	530	0	530	0	530	0	530	0	530	0	530	0	530	0	525	0	525	0	530	0	530	0	525	0	0	528.357	0.62553
14.2706	0	525	0	527	0	530	0	530	0	530	0	530	0	530	0	530	0	530	0	525	0	525	0	530	0	530	0	525	0	0	528.357	0.62553
14.2815	0	525	0	527	0	530	0	530	0	530	0	530	0	530	0	530	0	530	0	525	0	525	0	530	0	530	0	525	0	0	528.357	0.62553
14.2923	0	525	0	527	0	530	0	530	0	530	0	530	0	530	0	530	0	530	0	525	0	525	0	530	0	530	0	525	0	0	528.357	0.62553
14.3032	0	525	0	527	0	530	0	530	0	530	0	530	0	530	0	530	0	530	0	525	0	525	0	530	0	530	0	525	0	0	528.357	0.62553
14.3141	0	525	0	527	0	530	0	530	0	530	0	530	0	530	0	530	0	530	0	525	0	525	0	530	0	530	0	525	0	0	528.357	0.62553
14.3249	0	525	0	527	0	530	0	530	0	530	0	530	0	530	0	530	0	530	0	525	0	525	0	530	0	530	0	525	0	0	528.357	0.62553
14.3358	0	525	0	527	0	530	0	530	0	530	0	530	0	530	0	530	0	530	0	525	0	525	0	530	0	530	0	525	0	0	528.357	0.62553
14.3466	0	525	0	527	0	530	0	530	0	530	0	530	0	530	0	530	0	530	0	525	0	525	0	530	0	530	0	525	0	0	528.357	0.62553
14.3575	0	525	0	527	0	530	0	530	0	530	0	530	0	530	0	530	0	530	0	525	0	525	0	530	0	530	0	525	0	0	528.357	0.62553
14.3684	0	525	0	527	0	530	0	530	0	530	0	530	0	530	0	530	0	530	0	525	0	525	0	530	0	530	0	525	0	0	528.357	0.62553
14.3792	0	525	0	527	0	530	0	530	0	530	0	530	0	530	0	530	0	530	0	525	0	525	0	530	0	530	0	525	0	0	528.357	0.62553
14.3901	0	525	0	527	0	530	0	530	0	530	0	530	0	530	0	530	0	530	0	525	0	525	0	530	0	530	0	525	0	0	528.357	0.62553
14.4009	0	525	0	527	0	530	0	530	0	530	0	530	0	530	0	530	0	530	0	525	0	525	0	530	0	530	0	525	0	0	528.357	0.62553
14.4118	0	525	0	527	0	530	0	530	0	530	0	530	0	530	0	530	0	530	0	525	0	525	0	530	0	530	0	525	0	0	528.357	0.62553
14.4227	0	525	0	527	0	530	0	530	0	530	0	530	0	530	0	530	0	530	0	525	0	525	0	530	0	530	0	525	0	0	528.357	0.62553
14.4335	0	525	0	527	0	530	0	530	0	530	0	530	0	530	0	530	0	530	0	525	0	525	0	530	0	530	0	525	0	0	528.357	0.62553
14.4444	0	525	0	527	0	530	0	530	0	530	0	530	0	530	0	530	0	530	0	525	0	525	0	530	0	530	0	525	0	0	528.357	0.62553
14.4552	0	525	0	527	0	530	0	530	0	530	0	530	0	530	0	530	0	530	0	525	0	525	0	530	0	530	0	525	0	0	528.357	0.62553
14.4661	0	525	0	527	0	530	0	530	0	530	0	530	0	530	0	530	0	530	0	525	0	525	0	530	0	530	0	525	0	0	528.357	0.62553
14.477	0	525	0	527	0	530	0	530	0	530	0	530	0	530	0	530	0	530	0	525	0	525	0	530	0	530	0	525	0	0	528.357	0.62553
14.4878	0	525	0	527	0	530	0	530	0	530	0	530	0	530	0	530	0	530	0	525	0	525	0	530	0	530	0	525	0	0	528.357	0.62553
14.4987	0	525	0	527	0	530	0	530	0	530	0	530	0	530	0	530	0	530	0	525	0	525	0	530	0	530	0	525	0	0	528.357	0.62553
14.5095	0	525	0	527	0	530	0	530	0	530	0	530	0	530	0	530	0	530	0	525	0	525	0	530	0	530	0	525	0	0	528.357	0.62553
14.5204	0	525	0	527	0	530	0	530	0	530	0	530	0	530	0	530	0	530	0	525	0	525	0	530	0	530	0	525	0	0	528.357	0.62553
14.5313	0	525	0	527	0	530	0	530	0	530	0	530	0	530	0	530	0	530	0	525	0	525	0	530	0	530	0	525	0	0	528.357	0.62553
14.5421	0	525	0	527	0	530	0	530	0	530	0	530	0	530	0	530	0	530	0	525	0	525	0	530	0	530	0	525	0	0	528.357	0.62553
14.553	0	525	0	527	0	530	0	530	0	530	0	530	0	530	0	530	0	530	0	525	0	525	0	530	0	530	0	525	0	0	528.357	0.62553
14.5638	0	525	0	527	0	530	0	530	0	530	0	530	0	530	0	530	0	530	0	525	0	525	0	530	0	530	0	525	0	0	528.357	0.62553
14.5747	0	525	0	527	0	530	0	530	0	530	0	530	0	530	0	530	0	530	0	525	0	525	0	530	0	530	0	525	0	0	528.357	0.62553
14.5856	0	525	0	527	0	530	0	530	0	530	0	530	0	530	0	530	0	530	0	525	0	525	0	530	0	530	0	525	0	0	528.357	0.62553
14.5964	0	525	0	527	0	530	0	530	0	530	0	530	0	530	0	530	0	530	0	525	0	525	0	530	0	530	0	525	0	0	528.357	0.62553
14.6073	0	525	0	527	0	530	0	530	0	530	0	530	0	530	0	530	0	530	0	525	0	525	0	530	0	530	0	525	0	0	528.357	0.62553
14.6181	0	525	0	527	0	530	0	530	0	530	0	530	0	530	0	530	0	530	0	525	0	525	0	530	0	530	0	525	0	0	528.357	0.62553
14.629	0	525	0	527	0	530	0	530	0	530	0	530	0	530	0	530	0	530	0	525	0	525	0	530	0	530	0	525	0	0	528.357	0.62553
14.6399	0	525	0	527	0	530	0	530	0	530	0	530	0	530	0	530	0	530	0	525	0	525	0	530	0	530	0	525	0	0	528.357	0.62553
14.6507	0	525	0	527	0	530	0	530	0	530	0	530	0	530	0	530	0	530	0	525	0	525	0	530	0	530	0	525	0	0	528.357	0.62553
14.6616	0	525	0	527	0	530	0	530	0	530	0	530	0	530	0	530	0	530	0	525	0	525	0	530	0	530	0	525	0	0	528.357	0.62553
14.6724	0	525	0	527	0	530	0	530	0	530	0	530	0	530	0	530	0	530	0	525	0	525	0	530	0	530	0	525	0	0	528.357	0.62553
14.6833	0	525	0	527	0	530	0	530	0	530	0	530	0	530	0	530	0	530	0	525	0	525	0	530	0	530	0	525	0	0	528.357	0.62553
14.6942	0	525	0	527	0	530	0	530	0	530	0	530	0	530	0	530	0	530	0	525	0	525	0	530	0	530	0	525	0	0	528.357	0.62553
14.705	0	525	0	527	0	530	0	530	0	530	0	530	0	530	0	530	0	530	0	525	0	525	0	530	0	530	0	525	0	0	528.357	0.62553
14.7159	0	525	0	527	0	530	0	530	0	530	0	530	0	530	0	530	0	530	0	525	0	525	0	530	0	530	0	525	0	0	528.357	0.62553
14.7268	0	525	0	527	0	530	0	530	0	530	0	530	0	530	0	530	0	530	0	525	0	525	0	530	0	530	0	525	0	0	528.357	0.62553
14.7376	0	525	0	527	0	530	0	530	0	530	0	530	0	530	0	530	0	530	0	525	0	525	0	530	0	530	0	525	0	0	528.357	0.62553
14.7485	0	525	0	527	0	530	0	530	0	530	0	530	0	530	0	530	0	530	0	525	0	525	0	530	0	530	0	525	0	0	528.357	0.62553
14.7593	0	525	0	527	0	530	0	530	0	530	0	530	0	530	0	530	0	530	0	525	0	525	0	530	0	530	0	525	0	0	528.357	0.62553
14.7702	0	525	0	527	0	530	0	530	0	530	0	530	0	530	0	530	0	530	0	525	0	525	0	530	0	530	0	525	0	0	528.357	0.62553
14.7811	0	525	0	527	0	530	0	530	0	530	0	530	0	530	0	530	0	530	0	525	0	525	0	530	0	530	0	525	0	0	528.357	0.62553
14.7919	0	525	0	527	0	530	0	530	0	530	0	530	0	530	0	530	0	530	0	525	0	525	0	530	0	530	0	525	0	0	528.357	0.62553
14.8028	0	525	0	527	0	530	0	530	0	530	0	530	0	530	0	530	0	530	0	525	0	525	0	530	0	530	0	525	0	0	528.357	0.62553
14.8136	0	525	0	527	0	530	0	530	0	530	0	530	0	530	0	530	0	530	0	525	0	525	0	530	0	530	0	525	0	0	528.357	0.62553
14.8245	0	525	0	527	0	530	0	530	0	530	0	530	0	530	0	530	0	530	0	525	0	525	0	530	0	530	0	525	0	0	528.357	0.62553
14.8354	0	525	0	527	0	530	0	530	0	530	0	530	0	530	0	530	0	530	0	525	0	525	0	530	0	530	0	525	0	0	528.357	0.62553
14.8462	0	525	0	527	0	530	0	530	0	530	0	530	0	530	0	530	0	530	0	525	0	525	0	530	0	530	0	525	0	0	528.357	0.62553
14.8571	0	525	0	527	0	530	0	530	0	530	0	530	0	530	0	530	0	530	0	525	0	525	0	530	0	530	0	525	0	0	528.357	0.62553
14.8679	0	525	0	527	0	530	0	530	0	530	0	530	0	530	0	530	0	530	0	525	0	525	0	530	0	530	0	525	0	0	528.357	0.62553
14.8788	0	525	0	527	0	530	0	530	0	530	0	530	0	530	0	530	0	530	0	525	0	525	0	530	0	530	0	525	0	0	528.357	0.62553
14.8897	0	525	0	527	0	530	0	530	0	530	0	530	0	530	0	530	0	530	0	525	0	525	0	530	0	530	0	525	0	0	528.357	0.62553
14.9005	0	525	0	527	0	530	0	530	0	530	0	530	0	530	0	530	0	530	0	525	0	525	0	530	0	530	0	525	0	0	528.357	0.62553
14.9114	0	525	0	527	0	530	0	530	0	530	0	530	0	530	0	530	0	530	0	525	0	525	0	530	0	530	0	525	0	0	528.357	0.62553
14.9222	0	525	0	527	0	530	0	530	0	530	0	530	0	530	0	530	0	530	0	525	0	525	0	530	0	530	0	525	0	0	528.357	0.62553
14.9331	0	525	0	527	0	530	0	530	0	530	0	530	0	530	0	530	0	530	0	525	0	525	0	530	0	530	0	525	0	0	528.357	0.62553
14.944	0	525	0	527	0	530	0	530	0	530	0	530	0	530	0	530	0	530	0	525	0	525	0	530	0	530	0	525	0	0	528.357	0.62553
14.9548	0	525	0	527	0	530	0	530	0	530	0	530	0	530	0	530	0	530	0	525	0	525	0	530	0	530	0	525	0	0	528.357	0.62553
14.9657	0	525	0	527	0	530	0	530	0	530	0	530	0	530	0	530	0	530	0	525	0	525	0	530	0	530	0	525	0	0	528.357	0.62553
14.9765	0	525	0	527	0	530	0	530	0	530	0	530	0	530	0	530	0	530	0	525	0	525	0	530	0	530	0	525	0	0	528.357	0.62553
14.9874	0	525	0	527	0	530	0	530	0	530	0	530	0	530	0	530	0	530	0	525	0	525	0	530	0	530	0	525	0	0	528.357	0.62553
14.9983	0	525	0	527	0	530	0	530	0	530	0	530	0	530	0	530	0	530	0	525	0	525	0	530	0	530	0	525	0	0	528.357	0.62553
15.0091	0	525	0	527	0	530	0	530	0	530	0	530	0	530	0	530	0	530	0	525	0	525	0	530	0	530	0	525	0	0	528.357	0.62553
15.02	0	525	0	527	0	530	0	530	0	530	0	530	0	530	0	530	0	530	0	525	0	525	0	530	0	530	0	525	0	0	528.357	0.62553
15.0308	0	525	0	527	0	530	0	530	0	530	0	530	0	530	0	530	0	530	0	525	0	525	0	530	0	530	0	525	0	0	528.357	0.62553
15.0417	0	525	0	527	0	530	0	530	0	530	0	530	0	530	0	530	0	530	0	525	0	525	0	530	0	530	0	525	0	0	528.357	0.62553
15.0526	0	525	0	527	0	530	0	530	0	530	0	530	0	530	0	530	0	530	0	525	0	525	0	530	0	530	0	525	0	0	528.357	0.62553
15.0634	0	525	0	527	0	530	0	530	0	530	0	530	0	530	0	530	0	530	0	525	0	525	0	530	0	530	0	525	0	0	528.357	0.62553
15.0743	0	525	0	527	0	530	0	530	0	530	0	530	0	530	0	530	0	530	0	525	0	525	0	530	0	530	0	525	0	0	528.357	0.62553
15.0851	0	525	0	527	0	530	0	530	0	530	0	530	0	530	0	530	0	530	0	525	0	525	0	530	0	530	0	525	0	0	528.357	0.62553
15.096	0	525	0	527	0	530	0	530	0	530	0	530	0	530	0	530	0	530	0	525	0	525	0	530	0	530	0	525	0	0	528.357	0.62553
15.1069	0	525	0	527	0	530	0	530	0	530	0	530	0	530	0	530	0	530	0	525	0	525	0	530	0	530	0	525	0	0	528.357	0.62553
15.1177	0	525	0	527	0	530	0	530	0	530	0	530	0	530	0	530	0	530	0	525	0	525	0	530	0	530	0	525	0	0	528.357	0.62553
15.1286	0	525	0	527	0	530	0	530	0	530	0	530	0	530	0	530	0	530	0	525	0	525	0	530	0	530	0	525	0	0	528.357	0.62553
15.1394	0	525	0	527	0	530	0	530	0	530	0	530	0	530	0	530	0	530	0	525	0	525	0	530	0	530	0	525	0	0	528.357	0.62553
15.1503	0	525	0	527	0	530	0	530	0	530	0	530	0	530	0	530	0	530	0	525	0	525	0	530	0	530	0	525	0	0	528.357	0.62553
15.1612	0	525	0	527	0	530	0	530	0	530	0	530	0	530	0	530	0	530	0	525	0	525	0	530	0	530	0	525	0	0	528.357	0.62553
15.172	0	525	0	527	0	530	0	530	0	530	0	530	0	530	0	530	0	530	0	525	0	525	0	530	0	530	0	525	0	0	528.357	0.62553
15.1829	0	525	0	527	0	530	0	530	0	530	0	530	0	530	0	530	0	530	0	525	0	525	0	530	0	530	0	525	0	0	528.357	0.62553
15.1938	0	525	0	527	0	530	0	530	0	530	0	530	0	530	0	530	0	530	0	525	0	525	0	530	0	530	0	525	0	0	528.357	0.62553
15.2046	0	525	0	527	0	530	0	530	0	530	0	530	0	530	0	530	0	530	0	525	0	525	0	530	0	530	0	525	0	0	528.357	0.62553
15.2155	0	525	0	527	0	530	0	530	0	530	0	530	0	530	0	530	0	530	0	525	0	525	0	530	0	530	0	525	0	0	528.357	0.62553
15.2263	0	525	0	527	0	530	0	530	0	530	0	530	0	530	0	530	0	530	0	525	0	525	0	530	0	530	0	525	0	0	528.357	0.62553
15.2372	0	525	0	527	0	530	0	530	0	530	0	530	0	530	0	530	0	530	0	525	0	525	0	530	0	530	0	525	0	0	528.357	0.62553
15.2481	0	525	0	527	0	530	0	530	0	530	0	530	0	530	0	530	0	530	0	525	0	525	0	530	0	530	0	525	0	0	528.357	0.62553
15.2589	0	525	0	527	0	530	0	530	0	530	0	530	0	530	0	530	0	530	0	525	0	525	0	530	0	530	0	525	0	0	528.357	0.62553
15.2698	0	525	0	527	0	530	0	530	0	530	0	530	0	530	0	530	0	530	0	525	0	525	0	530	0	530	0	525	0	0	528.357	0.62553
15.2806	0	525	0	527	0	530	0	530	0	530	0	530	0	530	0	530	0	530	0	525	0	525	0	530	0	530	0	525	0	0	528.357	0.62553
15.2915	0	525	0	527	0	530	0	530	0	530	0	530	0	530	0	530	0	530	0	525	0	525	0	530	0	530	0	525	0	0	528.357	0.62553
15.3024	0	525	0	527	0	530	0	530	0	530	0	530	0	530	0	530	0	530	0	525	0	525	0	530	0	530	0	525	0	0	528.357	0.62553
15.3132	0	525	0	527	0	530	0	530	0	530	0	530	0	530	0	530	0	530	0	525	0	525	0	530	0	530	0	525	0	0	528.357	0.62553
15.3241	0	525	0	527	0	530	0	530	0	530	0	530	0	530	0	530	0	530	0	525	0	525	0	530	0	530	0	525	0	0	528.357	0.62553
15.3349	0	525	0	527	0	530	0	530	0	530	0	530	0	530	0	530	0	530	0	525	0	525	0	530	0	530	0	525	0	0	528.357	0.62553
15.3458	0	525	0	527	0	530	0	530	0	530	0	530	0	530	0	530	0	530	0	525	0	525	0	530	0	530	0	525	0	0	528.357	0.62553
15.3567	0	525	0	527	0	530	0	530	0	530	0	530	0	530	0	530	0	530	0	525	0	525	0	530	0	530	0	525	0	0	528.357	0.62553
15.3675	0	525	0	527	0	530	0	530	0	530	0	530	0	530	0	530	0	530	0	525	0	525	0	530	0	530	0	525	0	0	528.357	0.62553
15.3784	0	525	0	527	0	530	0	530	0	530	0	530	0	530	0	530	0	530	0	525	0	525	0	530	0	530	0	525	0	0	528.357	0.62553
15.3892	0	525	0	527	0	530	0	530	0	530	0	530	0	530	0	530	0	530	0	525	0	525	0	530	0	530	0	525	0	0	528.357	0.62553
15.4001	0	525	0	527	0	530	0	530	0	530	0	530	0	530	0	530	0	530	0	525	0	525	0	530	0	530	0	525	0	0	528.357	0.62553
15.411	0	525	0	527	0	530	0	530	0	530	0	530	0	530	0	530	0	530	0	525	0	525	0	530	0	530	0	525	0	0	528.357	0.62553
15.4218	0	525	0	527	0	530	0	530	0	530	0	530	0	530	0	530	0	530	0	525	0	525	0	530	0	530	0	525	0	0	528.357	0.62553
15.4327	0	525	0	527	0	530	0	530	0	530	0	530	0	530	0	530	0	530	0	525	0	525	0	530	0	530	0	525	0	0	528.357	0.62553
15.4435	0	525	0	527	0	530	0	530	0	530	0	530	0	530	0	530	0	530	0	525	0	525	0	530	0	530	0	525	0	0	528.357	0.62553
15.4544	0	525	0	527	0	530	0	530	0	530	0	530	0	530	0	530	0	530	0	525	0	525	0	530	0	530	0	525	0	0	528.357	0.62553
15.4653	0	525	0	527	0	530	0	530	0	530	0	530	0	530	0	530	0	530	0	525	0	525	0	530	0	530	0	525	0	0	528.357	0.62553
15.4761	0	525	0	527	0	530	0	530	0	530	0	530	0	530	0	530	0	530	0	525	0	525	0	530	0	530	0	525	0	0	528.357	0.62553
15.487	0	525	0	527	0	530	0	530	0	530	0	530	0	530	0	530	0	530	0	525	0	525	0	530	0	530	0	525	0	0	528.357	0.62553
15.4978	0	525	0	527	0	530	0	530	0	530	0	530	0	530	0	530	0	530	0	525	0	525	0	530	0	530	0	525	0	0	528.357	0.62553
15.5087	0	525	0	527	0	530	0	530	0	530	0	530	0	530	0	530	0	530	0	525	0	525	0	530	0	530	0	525	0	0	528.357	0.62553
15.5196	0	525	0	527	0	530	0	530	0	530	0	530	0	530	0	530	0	530	0	525	0	525	0	530	0	530	0	525	0	0	528.357	0.62553
15.5304	0	525	0	527	0	530	0	530	0	530	0	530	0	530	0	530	0	530	0	525	0	525	0	530	0	530	0	525	0	0	528.357	0.62553
15.5413	0	525	0	527	0	530	0	530	0	530	0	530	0	530	0	530	0	530	0	525	0	525	0	530	0	530	0	525	0	0	528.357	0.62553
15.5521	0	525	0	527	0	530	0	530	0	530	0	530	0	530	0	530	0	530	0	525	0	525	0	530	0	530	0	525	0	0	528.357	0.62553
15.563	0	525	0	527	0	530	0	530	0	530	0	530	0	530	0	530	0	530	0	525	0	525	0	530	0	530	0	525	0	0	528.357	0.62553
15.5739	0	525	0	527	0	530	0	530	0	530	0	530	0	530	0	530	0	530	0	525	0	525	0	530	0	530	0	525	0	0	528.357	0.62553
15.5847	0	525	0	527	0	530	0	530	0	530	0	530	0	530	0	530	0	530	0	525	0	525	0	530	0	530	0	525	0	0	528.357	0.62553
15.5956	0	525	0	527	0	530	0	530	0	530	0	530	0	530	0	530	0	530	0	525	0	525	0	530	0	530	0	525	0	0	528.357	0.62553
15.6064	0	525	0	527	0	530	0	530	0	530	0	530	0	530	0	530	0	530	0	525	0	525	0	530	0	530	0	525	0	0	528.357	0.62553
15.6173	0	525	0	527	0	530	0	530	0	530	0	530	0	530	0	530	0	530	0	525	0	525	0	530	0	530	0	525	0	0	528.357	0.62553
15.6282	0	525	0	527	0	530	0	530	0	530	0	530	0	530	0	530	0	530	0	525	0	525	0	530	0	530	0	525	0	0	528.357	0.62553
15.639	0	525	0	527	0	530	0	530	0	530	0	530	0	530	0	530	0	530	0	525	0	525	0	530	0	530	0	525	0	0	528.357	0.62553
15.6499	0	525	0	527	0	530	0	530	0	530	0	530	0	530	0	530	0	530	0	525	0	525	0	530	0	530	0	525	0	0	528.357	0.62553
15.6607	0	525	0	527	0	530	0	530	0	530	0	530	0	530	0	530	0	530	0	525	0	525	0	530	0	530	0	525	0	0	528.357	0.62553
15.6716	0	525	0	527	0	530	0	530	0	530	0	530	0	530	0	530	0	530	0	525	0	525	0	530	0	530	0	525	0	0	528.357	0.62553
15.6825	0	525	0	527	0	530	0	530	0	530	0	530	0	530	0	530	0	530	0	525	0	525	0	530	0	530	0	525	0	0	528.357	0.62553
15.6933	0	525	0	527	0	530	0	530	0	530	0	530	0	530	0	530	0	530	0	525	0	525	0	530	0	530	0	525	0	0	528.357	0.62553
15.7042	0	525	0	527	0	530	0	530	0	530	0	530	0	530	0	530	0	530	0	525	0	525	0	530	0	530	0	525	0	0	528.357	0.62553
15.7151	0	525	0	527	0	530	0	530	0	530	0	530	0	530	0	530	0	530	0	525	0	525	0	530	0	530	0	525	0	0	528.357	0.62553
15.7259	0	525	0	527	0	530	0	530	0	530	0	530	0	530	0	530	0	530	0	525	0	525	0	530	0	530	0	525	0	0	528.357	0.62553
15.7368	0	525	0	527	0	530	0	530	0	530	0	530	0	530	0	530	0	530	0	525	0	525	0	530	0	530	0	525	0	0	528.357	0.62553
15.7476	0	525	0	527	0	530	0	530	0	530	0	530	0	530	0	530	0	530	0	525	0	525	0	530	0	530	0	525	0	0	528.357	0.62553
15.7585	0	525	0	527	0	530	0	530	0	530	0	530	0	530	0	530	0	530	0	525	0	525	0	530	0	530	0	525	0	0	528.357	0.62553
15.7694	0	525	0	527	0	530	0	530	0	530	0	530	0	530	0	530	0	530	0	525	0	525	0	530	0	530	0	525	0	0	528.357	0.62553
15.7802	0	525	0	527	0	530	0	530	0	530	0	530	0	530	0	530	0	530	0	525	0	525	0	530	0	530	0	525	0	0	528.357	0.62553
15.7911	0	525	0	527	0	530	0	530	0	530	0	530	0	530	0	530	0	530	0	525	0	525	0	530	0	530	0	525	0	0	528.357	0.62553
15.8019	0	525	0	527	0	530	0	530	0	530	0	530	0	530	0	530	0	530	0	525	0	525	0	530	0	530	0	525	0	0	528.357	0.62553
15.8128	0	525	0	527	0	530	0	530	0	530	0	530	0	530	0	530	0	530	0	525	0	525	0	530	0	530	0	525	0	0	528.357	0.62553
15.8237	0	525	0	527	0	530	0	530	0	530	0	530	0	530	0	530	0	530	0	525	0	525	0	530	0	530	0	525	0	0	528.357	0.62553
15.8345	0	525	0	527	0	530	0	530	0	530	0	530	0	530	0	530	0	530	0	525	0	525	0	530	0	530	0	525	0	0	528.357	0.62553
15.8454	0	525	0	527	0	530	0	530	0	530	0	530	0	530	0	530	0	530	0	525	0	525	0	530	0	530	0	525	0	0	528.357	0.62553
15.8562	0	525	0	527	0	530	0	530	0	530	0	530	0	530	0	530	0	530	0	525	0	525	0	530	0	530	0	525	0	0	528.357	0.62553
15.8671	0	525	0	527	0	530	0	530	0	530	0	530	0	530	0	530	0	530	0	525	0	525	0	530	0	530	0	525	0	0	528.357	0.62553
15.878	0	525	0	527	0	530	0	530	0	530	0	530	0	530	0	530	0	530	0	525	0	525	0	530	0	530	0	525	0	0	528.357	0.62553
15.8888	0	525	0	527	0	530	0	530	0	530	0	530	0	530	0	530	0	530	0	525	0	525	0	530	0	530	0	525	0	0	528.357	0.62553
15.8997	0	525	0	527	0	530	0	530	0	530	0	530	0	530	0	530	0	530	0	525	0	525	0	530	0	530	0	525	0	0	528.357	0.62553
15.9105	0	525	0	527	0	530	0	530	0	530	0	530	0	530	0	530	0	530	0	525	0	525	0	530	0	530	0	525	0	0	528.357	0.62553
15.9214	0	525	0	527	0	530	0	530	0	530	0	530	0	530	0	530	0	530	0	525	0	525	0	530	0	530	0	525	0	0	528.357	0.62553
15.9323	0	525	0	527	0	530	0	530	0	530	0	530	0	530	0	530	0	530	0	525	0	525	0	530	0	530	0	525	0	0	528.357	0.62553
15.9431	0	525	0	527	0	530	0	530	0	530	0	530	0	530	0	530	0	530	0	525	0	525	0	530	0	530	0	525	0	0	528.357	0.62553
15.954	0	525	0	527	0	530	0	530	0	530	0	530	0	530	0	530	0	530	0	525	0	525	0	530	0	530	0	525	0	0	528.357	0.62553
15.9648	0	525	0	527	0	530	0	530	0	530	0	530	0	530	0	530	0	530	0	525	0	525	0	530	0	530	0	525	0	0	528.357	0.62553
15.9757	0	525	0	527	0	530	0	530	0	530	0	530	0	530	0	530	0	530	0	525	0	525	0	530	0	530	0	525	0	0	528.357	0.62553
15.9866	0	525	0	527	0	530	0	530	0	530	0	530	0	530	0	530	0	530	0	525	0	525	0	530	0	530	0	525	0	0	528.357	0.62553
15.9974	0	525	0	527	0	530	0	530	0	530	0	530	0	530	0	530	0	530	0	525	0	525	0	530	0	530	0	525	0	0	528.357	0.62553
16.0083	0	525	0	527	0	530	0	530	0	530	0	530	0	530	0	530	0	530	0	525	0	525	0	530	0	530	0	525	0	0	528.357	0.62553
16.0191	0	525	0	527	0	530	0	530	0	530	0	530	0	530	0	530	0	530	0	525	0	525	0	530	0	530	0	525	0	0	528.357	0.62553
16.03	0	525	0	527	0	530	0	530	0	530	0	530	0	530	0	530	0	530	0	525	0	525	0	530	0	530	0	525	0	0	528.357	0.62553
16.0409	0	525	0	527	0	530	0	530	0	530	0	530	0	530	0	530	0	530	0	525	0	525	0	530	0	530	0	525	0	0	528.357	0.62553
16.0517	0	525	0	527	0	530	0	530	0	530	0	530	0	530	0	530	0	530	0	525	0	525	0	530	0	530	0	525	0	0	528.357	0.62553
16.0626	0	525	0	527	0	530	0	530	0	530	0	530	0	530	0	530	0	530	0	525	0	525	0	530	0	530	0	525	0	0	528.357	0.62553
16.0734	0	525	0	527	0	530	0	530	0	530	0	530	0	530	0	530	0	530	0	525	0	525	0	530	0	530	0	525	0	0	528.357	0.62553
16.0843	0	525	0	527	0	530	0	530	0	530	0	530	0	530	0	530	0	530	0	525	0	525	0	530	0	530	0	525	0	0	528.357	0.62553
16.0952	0	525	0	527	0	530	0	530	0	530	0	530	0	530	0	530	0	530	0	525	0	525	0	530	0	530	0	525	0	0	528.357	0.62553
16.106	0	525	0	527	0	530	0	530	0	530	0	530	0	530	0	530	0	530	0	525	0	525	0	530	0	530	0	525	0	0	528.357	0.62553
16.1169	0	525	0	527	0	530	0	530	0	530	0	530	0	530	0	530	0	530	0	525	0	525	0	530	0	530	0	525	0	0	528.357	0.62553
16.1277	0	525	0	527	0	530	0	530	0	530	0	530	0	530	0	530	0	530	0	525	0	525	0	530	0	530	0	525	0	0	528.357	0.62553
16.1386	0	525	0	527	0	530	0	530	0	530	0	530	0	530	0	530	0	530	0	525	0	525	0	530	0	530	0	525	0	0	528.357	0.62553
16.1495	0	525	0	527	0	530	0	530	0	530	0	530	0	530	0	530	0	530	0	525	0	525	0	530	0	530	0	525	0	0	528.357	0.62553
16.1603	0	525	0	527	0	530	0	530	0	530	0	530	0	530	0	530	0	530	0	525	0	525	0	530	0	530	0	525	0	0	528.357	0.62553
16.1712	0	525	0	527	0	530	0	530	0	530	0	530	0	530	0	530	0	530	0	525	0	525	0	530	0	530	0	525	0	0	528.357	0.62553
16.182	0	525	0	527	0	530	0	530	0	530	0	530	0	530	0	530	0	530	0	525	0	525	0	530	0	530	0	525	0	0	528.357	0.62553
16.1929	0	525	0	527	0	530	0	530	0	530	0	530	0	530	0	530	0	530	0	525	0	525	0	530	0	530	0	525	0	0	528.357	0.62553
16.2038	0	525	0	527	0	530	0	530	0	530	0	530	0	530	0	530	0	530	0	525	0	525	0	530	0	530	0	525	0	0	528.357	0.62553
16.2146	0	525	0	527	0	530	0	530	0	530	0	530	0	530	0	530	0	530	0	525	0	525	0	530	0	530	0	525	0	0	528.357	0.62553
16.2255	0	525	0	527	0	530	0	530	0	530	0	530	0	530	0	530	0	530	0	525	0	525	0	530	0	530	0	525	0	0	528.357	0.62553
16.2364	0	525	0	527	0	530	0	530	0	530	0	530	0	530	0	530	0	530	0	525	0	525	0	530	0	530	0	525	0	0	528.357	0.62553
16.2472	0	525	0	527	0	530	0	530	0	530	0	530	0	530	0	530	0	530	0	525	0	525	0	530	0	530	0	525	0	0	528.357	0.62553
16.2581	0	525	0	527	0	530	0	530	0	530	0	530	0	530	0	530	0	530	0	525	0	525	0	530	0	530	0	525	0	0	528.357	0.62553
16.2689	0	525	0	527	0	530	0	530	0	530	0	530	0	530	0	530	0	530	0	525	0	525	0	530	0	530	0	525	0	0	528.357	0.62553
16.2798	0	525	0	527	0	530	0	530	0	530	0	530	0	530	0	530	0	530	0	525	0	525	0	530	0	530	0	525	0	0	528.357	0.62553
16.2907	0	525	0	527	0	530	0	530	0	530	0	530	0	530	0	530	0	530	0	525	0	525	0	530	0	530	0	525	0	0	528.357	0.62553
16.3015	0	525	0	527	0	530	0	530	0	530	0	530	0	530	0	530	0	530	0	525	0	525	0	530	0	530	0	525	0	0	528.357	0.62553
16.3124	0	525	0	527	0	530	0	530	0	530	0	530	0	530	0	530	0	530	0	525	0	525	0	530	0	530	0	525	0	0	528.357	0.62553
16.3232	0	525	0	527	0	530	0	530	0	530	0	530	0	530	0	530	0	530	0	525	0	525	0	530	0	530	0	525	0	0	528.357	0.62553
16.3341	0	525	0	527	0	530	0	530	0	530	0	530	0	530	0	530	0	530	0	525	0	525	0	530	0	530	0	525	0	0	528.357	0.62553
16.345	0	525	0	527	0	530	0	530	0	530	0	530	0	530	0	530	0	530	0	525	0	525	0	530	0	530	0	525	0	0	528.357	0.62553
16.3558	0	525	0	527	0	530	0	530	0	530	0	530	0	530	0	530	0	530	0	525	0	525	0	530	0	530	0	525	0	0	528.357	0.62553
16.3667	0	525	0	527	0	530	0	530	0	530	0	530	0	530	0	530	0	530	0	525	0	525	0	530	0	530	0	525	0	0	528.357	0.62553
16.3775	0	525	0	527	0	530	0	530	0	530	0	530	0	530	0	530	0	530	0	525	0	525	0	530	0	530	0	525	0	0	528.357	0.62553
16.3884	0	525	0	527	0	530	0	530	0	530	0	530	0	530	0	530	0	530	0	525	0	525	0	530	0	530	0	525	0	0	528.357	0.62553
16.3993	0	525	0	527	0	530	0	530	0	530	0	530	0	530	0	530	0	530	0	525	0	525	0	530	0	530	0	525	0	0	528.357	0.62553
16.4101	0	525	0	527	0	530	0	530	0	530	0	530	0	530	0	530	0	530	0	525	0	525	0	530	0	530	0	525	0	0	528.357	0.62553
16.421	0	525	0	527	0	530	0	530	0	530	0	530	0	530	0	530	0	530	0	525	0	525	0	530	0	530	0	525	0	0	528.357	0.62553
16.4318	0	525	0	527	0	530	0	530	0	530	0	530	0	530	0	530	0	530	0	525	0	525	0	530	0	530	0	525	0	0	528.357	0.62553
16.4427	0	525	0	527	0	530	0	530	0	530	0	530	0	530	0	530	0	530	0	525	0	525	0	530	0	530	0	525	0	0	528.357	0.62553
16.4536	0	525	0	527	0	530	0	530	0	530	0	530	0	530	0	530	0	530	0	525	0	525	0	530	0	530	0	525	0	0	528.357	0.62553
16.4644	0	525	0	527	0	530	0	530	0	530	0	530	0	530	0	530	0	530	0	525	0	525	0	530	0	530	0	525	0	0	528.357	0.62553
16.4753	0	525	0	527	0	530	0	530	0	530	0	530	0	530	0	530	0	530	0	525	0	525	0	530	0	530	0	525	0	0	528.357	0.62553
16.4861	0	525	0	527	0	530	0	530	0	530	0	530	0	530	0	530	0	530	0	525	0	525	0	530	0	530	0	525	0	0	528.357	0.62553
16.497	0	525	0	527	0	530	0	530	0	530	0	530	0	530	0	530	0	530	0	525	0	525	0	530	0	530	0	525	0	0	528.357	0.62553
16.5079	0	525	0	527	0	530	0	530	0	530	0	530	0	530	0	530	0	530	0	525	0	525	0	530	0	530	0	525	0	0	528.357	0.62553
16.5187	0	525	0	527	0	530	0	530	0	530	0	530	0	530	0	530	0	530	0	525	0	525	0	530	0	530	0	525	0	0	528.357	0.62553
16.5296	0	525	0	527	0	530	0	530	0	530	0	530	0	530	0	530	0	530	0	525	0	525	0	530	0	530	0	525	0	0	528.357	0.62553
16.5404	0	525	0	527	0	530	0	530	0	530	0	530	0	530	0	530	0	530	0	525	0	525	0	530	0	530	0	525	0	0	528.357	0.62553
16.5513	0	525	0	527	0	530	0	530	0	530	0	530	0	530	0	530	0	530	0	525	0	525	0	530	0	530	0	525	0	0	528.357	0.62553
16.5622	0	525	0	527	0	530	0	530	0	530	0	530	0	530	0	530	0	530	0	525	0	525	0	530	0	530	0	525	0	0	528.357	0.62553
16.573	0	525	0	527	0	530	0	530	0	530	0	530	0	530	0	530	0	530	0	525	0	525	0	530	0	530	0	525	0	0	528.357	0.62553
16.5839	0	525	0	527	0	530	0	530	0	530	0	530	0	530	0	530	0	530	0	525	0	525	0	530	0	530	0	525	0	0	528.357	0.62553
16.5947	0	525	0	527	0	530	0	530	0	530	0	530	0	530	0	530	0	530	0	525	0	525	0	530	0	530	0	525	0	0	528.357	0.62553
16.6056	0	525	0	527	0	530	0	530	0	530	0	530	0	530	0	530	0	530	0	525	0	525	0	530	0	530	0	525	0	0	528.357	0.62553
16.6165	0	525	0	527	0	530	0	530	0	530	0	530	0	530	0	530	0	530	0	525	0	525	0	530	0	530	0	525	0	0	528.357	0.62553
16.6273	0	525	0	527	0	530	0	530	0	530	0	530	0	530	0	530	0	530	0	525	0	525	0	530	0	530	0	525	0	0	528.357	0.62553
16.6382	0	525	0	527	0	530	0	530	0	530	0	530	0	530	0	530	0	530	0	525	0	525	0	530	0	530	0	525	0	0	528.357	0.62553
16.649	0	525	0	527	0	530	0	530	0	530	0	530	0	530	0	530	0	530	0	525	0	525	0	530	0	530	0	525	0	0	528.357	0.62553
16.6599	0	525	0	527	0	530	0	530	0	530	0	530	0	530	0	530	0	530	0	525	0	525	0	530	0	530	0	525	0	0	528.357	0.62553
16.6708	0	525	0	527	0	530	0	530	0	530	0	530	0	530	0	530	0	530	0	525	0	525	0	530	0	530	0	525	0	0	528.357	0.62553
16.6816	0	525	0	527	0	530	0	530	0	530	0	530	0	530	0	530	0	530	0	525	0	525	0	530	0	530	0	525	0	0	528.357	0.62553
16.6925	0	525	0	527	0	530	0	530	0	530	0	530	0	530	0	530	0	530	0	525	0	525	0	530	0	530	0	525	0	0	528.357	0.62553
16.7034	0	525	0	527	0	530	0	530	0	530	0	530	0	530	0	530	0	530	0	525	0	525	0	530	0	530	0	525	0	0	528.357	0.62553
16.7142	0	525	0	527	0	530	0	530	0	530	0	530	0	530	0	530	0	530	0	525	0	525	0	530	0	530	0	525	0	0	528.357	0.62553
16.7251	0	525	0	527	0	530	0	530	0	530	0	530	0	530	0	530	0	530	0	525	0	525	0	530	0	530	0	525	0	0	528.357	0.62553
16.7359	0	525	0	527	0	530	0	530	0	530	0	530	0	530	0	530	0	530	0	525	0	525	0	530	0	530	0	525	0	0	528.357	0.62553
16.7468	0	525	0	527	0	530	0	530	0	530	0	530	0	530	0	530	0	530	0	525	0	525	0	530	0	530	0	525	0	0	528.357	0.62553
16.7577	0	525	0	527	0	530	0	530	0	530	0	530	0	530	0	530	0	530	0	525	0	525	0	530	0	530	0	525	0	0	528.357	0.62553
16.7685	0	525	0	527	0	530	0	530	0	530	0	530	0	530	0	530	0	530	0	525	0	525	0	530	0	530	0	525	0	0	528.357	0.62553
16.7794	0	525	0	527	0	530	0	530	0	530	0	530	0	530	0	530	0	530	0	525	0	525	0	530	0	530	0	525	0	0	528.357	0.62553
16.7902	0	525	0	527	0	530	0	530	0	530	0	530	0	530	0	530	0	530	0	525	0	525	0	530	0	530	0	525	0	0	528.357	0.62553
16.8011	0	525	0	527	0	530	0	530	0	530	0	530	0	530	0	530	0	530	0	525	0	525	0	530	0	530	0	525	0	0	528.357	0.62553
16.812	0	525	0	527	0	530	0	530	0	530	0	530	0	530	0	530	0	530	0	525	0	525	0	530	0	530	0	525	0	0	528.357	0.62553
16.8228	0	525	0	527	0	530	0	530	0	530	0	530	0	530	0	530	0	530	0	525	0	525	0	530	0	530	0	525	0	0	528.357	0.62553
16.8337	0	525	0	527	0	530	0	530	0	530	0	530	0	530	0	530	0	530	0	525	0	525	0	530	0	530	0	525	0	0	528.357	0.62553
16.8445	0	525	0	527	0	530	0	530	0	530	0	530	0	530	0	530	0	530	0	525	0	525	0	530	0	530	0	525	0	0	528.357	0.62553
16.8554	0	525	0	527	0	530	0	530	0	530	0	530	0	530	0	530	0	530	0	525	0	525	0	530	0	530	0	525	0	0	528.357	0.62553
16.8663	0	525	0	527	0	530	0	530	0	530	0	530	0	530	0	530	0	530	0	525	0	525	0	530	0	530	0	525	0	0	528.357	0.62553
16.8771	0	525	0	527	0	530	0	530	0	530	0	530	0	530	0	530	0	530	0	525	0	525	0	530	0	530	0	525	0	0	528.357	0.62553
16.888	0	525	0	527	0	530	0	530	0	530	0	530	0	530	0	530	0	530	0	525	0	525	0	530	0	530	0	525	0	0	528.357	0.62553
16.8988	0	525	0	527	0	530	0	530	0	530	0	530	0	530	0	530	0	530	0	525	0	525	0	530	0	530	0	525	0	0	528.357	0.62553
16.9097	0	525	0	527	0	530	0	530	0	530	0	530	0	530	0	530	0	530	0	525	0	525	0	530	0	530	0	525	0	0	528.357	0.62553
16.9206	0	525	0	527	0	530	0	530	0	530	0	530	0	530	0	530	0	530	0	525	0	525	0	530	0	530	0	525	0	0	528.357	0.62553
16.9314	0	525	0	527	0	530	0	530	0	530	0	530	0	530	0	530	0	530	0	525	0	525	0	530	0	530	0	525	0	0	528.357	0.62553
16.9423	0	525	0	527	0	530	0	530	0	530	0	530	0	530	0	530	0	530	0	525	0	525	0	530	0	530	0	525	0	0	528.357	0.62553
16.9531	0	525	0	527	0	530	0	530	0	530	0	530	0	530	0	530	0	530	0	525	0	525	0	530	0	530	0	525	0	0	528.357	0.62553
16.964	0	525	0	527	0	530	0	530	0	530	0	530	0	530	0	530	0	530	0	525	0	525	0	530	0	530	0	525	0	0	528.357	0.62553
16.9749	0	525	0	527	0	530	0	530	0	530	0	530	0	530	0	530	0	530	0	525	0	525	0	530	0	530	0	525	0	0	528.357	0.62553
16.9857	0	525	0	527	0	530	0	530	0	530	0	530	0	530	0	530	0	530	0	525	0	525	0	530	0	530	0	525	0	0	528.357	0.62553
16.9966	0	525	0	527	0	530	0	530	0	530	0	530	0	530	0	530	0	530	0	525	0	525	0	530	0	530	0	525	0	0	528.357	0.62553
17.0074	0	525	0	527	0	530	0	530	0	530	0	530	0	530	0	530	0	530	0	525	0	525	0	530	0	530	0	525	0	0	528.357	0.62553
17.0183	0	525	0	527	0	530	0	530	0	530	0	530	0	530	0	530	0	530	0	525	0	525	0	530	0	530	0	525	0	0	528.357	0.62553
17.0292	0	525	0	527	0	530	0	530	0	530	0	530	0	530	0	530	0	530	0	525	0	525	0	530	0	530	0	525	0	0	528.357	0.62553
17.04	0	525	0	527	0	530	0	530	0	530	0	530	0	530	0	530	0	530	0	525	0	525	0	530	0	530	0	525	0	0	528.357	0.62553
17.0509	0	525	0	527	0	530	0	530	0	530	0	530	0	530	0	530	0	530	0	525	0	525	0	530	0	530	0	525	0	0	528.357	0.62553
17.0617	0	525	0	527	0	530	0	530	0	530	0	530	0	530	0	530	0	530	0	525	0	525	0	530	0	530	0	525	0	0	528.357	0.62553
17.0726	0	525	0	527	0	530	0	530	0	530	0	530	0	530	0	530	0	530	0	525	0	525	0	530	0	530	0	525	0	0	528.357	0.62553
17.0835	0	525	0	527	0	530	0	530	0	530	0	530	0	530	0	530	0	530	0	525	0	525	0	530	0	530	0	525	0	0	528.357	0.62553
17.0943	0	525	0	527	0	530	0	530	0	530	0	530	0	530	0	530	0	530	0	525	0	525	0	530	0	530	0	525	0	0	528.357	0.62553
17.1052	0	525	0	527	0	530	0	530	0	530	0	530	0	530	0	530	0	530	0	525	0	525	0	530	0	530	0	525	0	0	528.357	0.62553
17.116	0	525	0	527	0	530	0	530	0	530	0	530	0	530	0	530	0	530	0	525	0	525	0	530	0	530	0	525	0	0	528.357	0.62553
17.1269	0	525	0	527	0	530	0	530	0	530	0	530	0	530	0	530	0	530	0	525	0	525	0	530	0	530	0	525	0	0	528.357	0.62553
17.1378	0	525	0	527	0	530	0	530	0	530	0	530	0	530	0	530	0	530	0	525	0	525	0	530	0	530	0	525	0	0	528.357	0.62553
17.1486	0	525	0	527	0	530	0	530	0	530	0	530	0	530	0	530	0	530	0	525	0	525	0	530	0	530	0	525	0	0	528.357	0.62553
17.1595	0	525	0	527	0	530	0	530	0	530	0	530	0	530	0	530	0	530	0	525	0	525	0	530	0	530	0	525	0	0	528.357	0.62553
17.1703	0	525	0	527	0	530	0	530	0	530	0	530	0	530	0	530	0	530	0	525	0	525	0	530	0	530	0	525	0	0	528.357	0.62553
17.1812	0	525	0	527	0	530	0	530	0	530	0	530	0	530	0	530	0	530	0	525	0	525	0	530	0	530	0	525	0	0	528.357	0.62553
17.1921	0	525	0	527	0	530	0	530	0	530	0	530	0	530	0	530	0	530	0	525	0	525	0	530	0	530	0	525	0	0	528.357	0.62553
17.2029	0	525	0	527	0	530	0	530	0	530	0	530	0	530	0	530	0	530	0	525	0	525	0	530	0	530	0	525	0	0	528.357	0.62553
17.2138	0	525	0	527	0	530	0	530	0	530	0	530	0	530	0	530	0	530	0	525	0	525	0	530	0	530	0	525	0	0	528.357	0.62553
17.2247	0	525	0	527	0	530	0	530	0	530	0	530	0	530	0	530	0	530	0	525	0	525	0	530	0	530	0	525	0	0	528.357	0.62553
17.2355	0	525	0	527	0	530	0	530	0	530	0	530	0	530	0	530	0	530	0	525	0	525	0	530	0	530	0	525	0	0	528.357	0.62553
17.2464	0	525	0	527	0	530	0	530	0	530	0	530	0	530	0	530	0	530	0	525	0	525	0	530	0	530	0	525	0	0	528.357	0.62553
17.2572	0	525	0	527	0	530	0	530	0	530	0	530	0	530	0	530	0	530	0	525	0	525	0	530	0	530	0	525	0	0	528.357	0.62553
17.2681	0	525	0	527	0	530	0	530	0	530	0	530	0	530	0	530	0	530	0	525	0	525	0	530	0	530	0	525	0	0	528.357	0.62553
17.279	0	525	0	527	0	530	0	530	0	530	0	530	0	530	0	530	0	530	0	525	0	525	0	530	0	530	0	525	0	0	528.357	0.62553
17.2898	0	525	0	527	0	530	0	530	0	530	0	530	0	530	0	530	0	530	0	525	0	525	0	530	0	530	0	525	0	0	528.357	0.62553
17.3007	0	525	0	527	0	530	0	530	0	530	0	530	0	530	0	530	0	530	0	525	0	525	0	530	0	530	0	525	0	0	528.357	0.62553
17.3115	0	525	0	527	0	530	0	530	0	530	0	530	0	530	0	530	0	530	0	525	0	525	0	530	0	530	0	525	0	0	528.357	0.62553
17.3224	0	525	0	527	0	530	0	530	0	530	0	530	0	530	0	530	0	530	0	525	0	525	0	530	0	530	0	525	0	0	528.357	0.62553
17.3333	0	525	0	527	0	530	0	530	0	530	0	530	0	530	0	530	0	530	0	525	0	525	0	530	0	530	0	525	0	0	528.357	0.62553
17.3441	0	525	0	527	0	530	0	530	0	530	0	530	0	530	0	530	0	530	0	525	0	525	0	530	0	530	0	525	0	0	528.357	0.62553
17.355	0	525	0	527	0	530	0	530	0	530	0	530	0	530	0	530	0	530	0	525	0	525	0	530	0	530	0	525	0	0	528.357	0.62553
17.3658	0	525	0	527	0	530	0	530	0	530	0	530	0	530	0	530	0	530	0	525	0	525	0	530	0	530	0	525	0	0	528.357	0.62553
17.3767	0	525	0	527	0	530	0	530	0	530	0	530	0	530	0	530	0	530	0	525	0	525	0	530	0	530	0	525	0	0	528.357	0.62553
17.3876	0	525	0	527	0	530	0	530	0	530	0	530	0	530	0	530	0	530	0	525	0	525	0	530	0	530	0	525	0	0	528.357	0.62553
17.3984	0	525	0	527	0	530	0	530	0	530	0	530	0	530	0	530	0	530	0	525	0	525	0	530	0	530	0	525	0	0	528.357	0.62553
17.4093	0	525	0	527	0	530	0	530	0	530	0	530	0	530	0	530	0	530	0	525	0	525	0	530	0	530	0	525	0	0	528.357	0.62553
17.4201	0	525	0	527	0	530	0	530	0	530	0	530	0	530	0	530	0	530	0	525	0	525	0	530	0	530	0	525	0	0	528.357	0.62553
17.431	0	525	0	527	0	530	0	530	0	530	0	530	0	530	0	530	0	530	0	525	0	525	0	530	0	530	0	525	0	0	528.357	0.62553
17.4419	0	525	0	527	0	530	0	530	0	530	0	530	0	530	0	530	0	530	0	525	0	525	0	530	0	530	0	525	0	0	528.357	0.62553
17.4527	0	525	0	527	0	530	0	530	0	530	0	530	0	530	0	530	0	530	0	525	0	525	0	530	0	530	0	525	0	0	528.357	0.62553
17.4636	0	525	0	527	0	530	0	530	0	530	0	530	0	530	0	530	0	530	0	525	0	525	0	530	0	530	0	525	0	0	528.357	0.62553
17.4744	0	525	0	527	0	530	0	530	0	530	0	530	0	530	0	530	0	530	0	525	0	525	0	530	0	530	0	525	0	0	528.357	0.62553
17.4853	0	525	0	527	0	530	0	530	0	530	0	530	0	530	0	530	0	530	0	525	0	525	0	530	0	530	0	525	0	0	528.357	0.62553
17.4962	0	525	0	527	0	530	0	530	0	530	0	530	0	530	0	530	0	530	0	525	0	525	0	530	0	530	0	525	0	0	528.357	0.62553
17.507	0	525	0	527	0	530	0	530	0	530	0	530	0	530	0	530	0	530	0	525	0	525	0	530	0	530	0	525	0	0	528.357	0.62553
17.5179	0	525	0	527	0	530	0	530	0	530	0	530	0	530	0	530	0	530	0	525	0	525	0	530	0	530	0	525	0	0	528.357	0.62553
17.5287	0	525	0	527	0	530	0	530	0	530	0	530	0	530	0	530	0	530	0	525	0	525	0	530	0	530	0	525	0	0	528.357	0.62553
17.5396	0	525	0	527	0	530	0	530	0	530	0	530	0	530	0	530	0	530	0	525	0	525	0	530	0	530	0	525	0	0	528.357	0.62553
17.5505	0	525	0	527	0	530	0	530	0	530	0	530	0	530	0	530	0	530	0	525	0	525	0	530	0	530	0	525	0	0	528.357	0.62553
17.5613	0	525	0	527	0	530	0	530	0	530	0	530	0	530	0	530	0	530	0	525	0	525	0	530	0	530	0	525	0	0	528.357	0.62553
17.5722	0	525	0	527	0	530	0	530	0	530	0	530	0	530	0	530	0	530	0	525	0	525	0	530	0	530	0	525	0	0	528.357	0.62553
17.583	0	525	0	527	0	530	0	530	0	530	0	530	0	530	0	530	0	530	0	525	0	525	0	530	0	530	0	525	0	0	528.357	0.62553
17.5939	0	525	0	527	0	530	0	530	0	530	0	530	0	530	0	530	0	530	0	525	0	525	0	530	0	530	0	525	0	0	528.357	0.62553
17.6048	0	525	0	527	0	530	0	530	0	530	0	530	0	530	0	530	0	530	0	525	0	525	0	530	0	530	0	525	0	0	528.357	0.62553
17.6156	0	525	0	527	0	530	0	530	0	530	0	530	0	530	0	530	0	530	0	525	0	525	0	530	0	530	0	525	0	0	528.357	0.62553
17.6265	0	525	0	527	0	530	0	530	0	530	0	530	0	530	0	530	0	530	0	525	0	525	0	530	0	530	0	525	0	0	528.357	0.62553
17.6373	0	525	0	527	0	530	0	530	0	530	0	530	0	530	0	530	0	530	0	525	0	525	0	530	0	530	0	525	0	0	528.357	0.62553
17.6482	0	525	0	527	0	530	0	530	0	530	0	530	0	530	0	530	0	530	0	525	0	525	0	530	0	530	0	525	0	0	528.357	0.62553
17.6591	0	525	0	527	0	530	0	530	0	530	0	530	0	530	0	530	0	530	0	525	0	525	0	530	0	530	0	525	0	0	528.357	0.62553
17.6699	0	525	0	527	0	530	0	530	0	530	0	530	0	530	0	530	0	530	0	525	0	525	0	530	0	530	0	525	0	0	528.357	0.62553
17.6808	0	525	0	527	0	530	0	530	0	530	0	530	0	530	0	530	0	530	0	525	0	525	0	530	0	530	0	525	0	0	528.357	0.62553
17.6917	0	525	0	527	0	530	0	530	0	530	0	530	0	530	0	530	0	530	0	525	0	525	0	530	0	530	0	525	0	0	528.357	0.62553
17.7025	0	525	0	527	0	530	0	530	0	530	0	530	0	530	0	530	0	530	0	525	0	525	0	530	0	530	0	525	0	0	528.357	0.62553
17.7134	0	525	0	527	0	530	0	530	0	530	0	530	0	530	0	530	0	530	0	525	0	525	0	530	0	530	0	525	0	0	528.357	0.62553
17.7242	0	525	0	527	0	530	0	530	0	530	0	530	0	530	0	530	0	530	0	525	0	525	0	530	0	530	0	525	0	0	528.357	0.62553
17.7351	0	525	0	527	0	530	0	530	0	530	0	530	0	530	0	530	0	530	0	525	0	525	0	530	0	530	0	525	0	0	528.357	0.62553
17.746	0	525	0	527	0	530	0	530	0	530	0	530	0	530	0	530	0	530	0	525	0	525	0	530	0	530	0	525	0	0	528.357	0.62553
17.7568	0	525	0	527	0	530	0	530	0	530	0	530	0	530	0	530	0	530	0	525	0	525	0	530	0	530	0	525	0	0	528.357	0.62553
17.7677	0	525	0	527	0	530	0	530	0	530	0	530	0	530	0	530	0	530	0	525	0	525	0	530	0	530	0	525	0	0	528.357	0.62553
17.7785	0	525	0	527	0	530	0	530	0	530	0	530	0	530	0	530	0	530	0	525	0	525	0	530	0	530	0	525	0	0	528.357	0.62553
17.7894	0	525	0	527	0	530	0	530	0	530	0	530	0	530	0	530	0	530	0	525	0	525	0	530	0	530	0	525	0	0	528.357	0.62553
17.8003	0	525	0	527	0	530	0	530	0	530	0	530	0	530	0	530	0	530	0	525	0	525	0	530	0	530	0	525	0	0	528.357	0.62553
17.8111	0	525	0	527	0	530	0	530	0	530	0	530	0	530	0	530	0	530	0	525	0	525	0	530	0	530	0	525	0	0	528.357	0.62553
17.822	0	525	0	527	0	530	0	530	0	530	0	530	0	530	0	530	0	530	0	525	0	525	0	530	0	530	0	525	0	0	528.357	0.62553
17.8328	0	525	0	527	0	530	0	530	0	530	0	530	0	530	0	530	0	530	0	525	0	525	0	530	0	530	0	525	0	0	528.357	0.62553
17.8437	0	525	0	527	0	530	0	530	0	530	0	530	0	530	0	530	0	530	0	525	0	525	0	530	0	530	0	525	0	0	528.357	0.62553
17.8546	0	525	0	527	0	530	0	530	0	530	0	530	0	530	0	530	0	530	0	525	0	525	0	530	0	530	0	525	0	0	528.357	0.62553
17.8654	0	525	0	527	0	530	0	530	0	530	0	530	0	530	0	530	0	530	0	525	0	525	0	530	0	530	0	525	0	0	528.357	0.62553
17.8763	0	525	0	527	0	530	0	530	0	530	0	530	0	530	0	530	0	530	0	525	0	525	0	530	0	530	0	525	0	0	528.357	0.62553
17.8871	0	525	0	527	0	530	0	530	0	530	0	530	0	530	0	530	0	530	0	525	0	525	0	530	0	530	0	525	0	0	528.357	0.62553
17.898	0	525	0	527	0	530	0	530	0	530	0	530	0	530	0	530	0	530	0	525	0	525	0	530	0	530	0	525	0	0	528.357	0.62553
17.9089	0	525	0	527	0	530	0	530	0	530	0	530	0	530	0	530	0	530	0	525	0	525	0	530	0	530	0	525	0	0	528.357	0.62553
17.9197	0	525	0	527	0	530	0	530	0	530	0	530	0	530	0	530	0	530	0	525	0	525	0	530	0	530	0	525	0	0	528.357	0.62553
17.9306	0	525	0	527	0	530	0	530	0	530	0	530	0	530	0	530	0	530	0	525	0	525	0	530	0	530	0	525	0	0	528.357	0.62553
17.9414	0	525	0	527	0	530	0	530	0	530	0	530	0	530	0	530	0	530	0	525	0	525	0	530	0	530	0	525	0	0	528.357	0.62553
17.9523	0	525	0	527	0	530	0	530	0	530	0	530	0	530	0	530	0	530	0	525	0	525	0	530	0	530	0	525	0	0	528.357	0.62553
17.9632	0	525	0	527	0	530	0	530	0	530	0	530	0	530	0	530	0	530	0	525	0	525	0	530	0	530	0	525	0	0	528.357	0.62553
17.974	0	525	0	527	0	530	0	530	0	530	0	530	0	530	0	530	0	530	0	525	0	525	0	530	0	530	0	525	0	0	528.357	0.62553
17.9849	0	525	0	527	0	530	0	530	0	530	0	530	0	530	0	530	0	530	0	525	0	525	0	530	0	530	0	525	0	0	528.357	0.62553
17.9957	0	525	0	527	0	530	0	530	0	530	0	530	0	530	0	530	0	530	0	525	0	525	0	530	0	530	0	525	0	0	528.357	0.62553
18.0066	0	525	0	527	0	530	0	530	0	530	0	530	0	530	0	530	0	530	0	525	0	525	0	530	0	530	0	525	0	0	528.357	0.62553
18.0175	0	525	0	527	0	530	0	530	0	530	0	530	0	530	0	530	0	530	0	525	0	525	0	530	0	530	0	525	0	0	528.357	0.62553
18.0283	0	525	0	527	0	530	0	530	0	530	0	530	0	530	0	530	0	530	0	525	0	525	0	530	0	530	0	525	0	0	528.357	0.62553
18.0392	0	525	0	527	0	530	0	530	0	530	0	530	0	530	0	530	0	530	0	525	0	525	0	530	0	530	0	525	0	0	528.357	0.62553
18.05	0	525	0	527	0	530	0	530	0	530	0	530	0	530	0	530	0	530	0	525	0	525	0	530	0	530	0	525	0	0	528.357	0.62553
18.0609	0	525	0	527	0	530	0	530	0	530	0	530	0	530	0	530	0	530	0	525	0	525	0	530	0	530	0	525	0	0	528.357	0.62553
18.0718	0	525	0	527	0	530	0	530	0	530	0	530	0	530	0	530	0	530	0	525	0	525	0	530	0	530	0	525	0	0	528.357	0.62553
18.0826	0	525	0	527	0	530	0	530	0	530	0	530	0	530	0	530	0	530	0	525	0	525	0	530	0	530	0	525	0	0	528.357	0.62553
18.0935	0	525	0	527	0	530	0	530	0	530	0	530	0	530	0	530	0	530	0	525	0	525	0	530	0	530	0	525	0	0	528.357	0.62553
18.1043	0	525	0	527	0	530	0	530	0	530	0	530	0	530	0	530	0	530	0	525	0	525	0	530	0	530	0	525	0	0	528.357	0.62553
18.1152	0	525	0	527	0	530	0	530	0	530	0	530	0	530	0	530	0	530	0	525	0	525	0	530	0	530	0	525	0	0	528.357	0.62553
18.1261	0	525	0	527	0	530	0	530	0	530	0	530	0	530	0	530	0	530	0	525	0	525	0	530	0	530	0	525	0	0	528.357	0.62553
18.1369	0	525	0	527	0	530	0	530	0	530	0	530	0	530	0	530	0	530	0	525	0	525	0	530	0	530	0	525	0	0	528.357	0.62553
18.1478	0	525	0	527	0	530	0	530	0	530	0	530	0	530	0	530	0	530	0	525	0	525	0	530	0	530	0	525	0	0	528.357	0.62553
18.1586	0	525	0	527	0	530	0	530	0	530	0	530	0	530	0	530	0	530	0	525	0	525	0	530	0	530	0	525	0	0	528.357	0.62553
18.1695	0	525	0	527	0	530	0	530	0	530	0	530	0	530	0	530	0	530	0	525	0	525	0	530	0	530	0	525	0	0	528.357	0.62553
18.1804	0	525	0	527	0	530	0	530	0	530	0	530	0	530	0	530	0	530	0	525	0	525	0	530	0	530	0	525	0	0	528.357	0.62553
18.1912	0	525	0	527	0	530	0	530	0	530	0	530	0	530	0	530	0	530	0	525	0	525	0	530	0	530	0	525	0	0	528.357	0.62553
18.2021	0	525	0	527	0	530	0	530	0	530	0	530	0	530	0	530	0	530	0	525	0	525	0	530	0	530	0	525	0	0	528.357	0.62553
18.213	0	525	0	527	0	530	0	530	0	530	0	530	0	530	0	530	0	530	0	525	0	525	0	530	0	530	0	525	0	0	528.357	0.62553
18.2238	0	525	0	527	0	530	0	530	0	530	0	530	0	530	0	530	0	530	0	525	0	525	0	530	0	530	0	525	0	0	528.357	0.62553
18.2347	0	525	0	527	0	530	0	530	0	530	0	530	0	530	0	530	0	530	0	525	0	525	0	530	0	530	0	525	0	0	528.357	0.62553
18.2455	0	525	0	527	0	530	0	530	0	530	0	530	0	530	0	530	0	530	0	525	0	525	0	530	0	530	0	525	0	0	528.357	0.62553
18.2564	0	525	0	527	0	530	0	530	0	530	0	530	0	530	0	530	0	530	0	525	0	525	0	530	0	530	0	525	0	0	528.357	0.62553
18.2673	0	525	0	527	0	530	0	530	0	530	0	530	0	530	0	530	0	530	0	525	0	525	0	530	0	530	0	525	0	0	528.357	0.62553
18.2781	0	525	0	527	0	530	0	530	0	530	0	530	0	530	0	530	0	530	0	525	0	525	0	530	0	530	0	525	0	0	528.357	0.62553
18.289	0	525	0	527	0	530	0	530	0	530	0	530	0	530	0	530	0	530	0	525	0	525	0	530	0	530	0	525	0	0	528.357	0.62553
18.2998	0	525	0	527	0	530	0	530	0	530	0	530	0	530	0	530	0	530	0	525	0	525	0	530	0	530	0	525	0	0	528.357	0.62553
18.3107	0	525	0	527	0	530	0	530	0	530	0	530	0	530	0	530	0	530	0	525	0	525	0	530	0	530	0	525	0	0	528.357	0.62553
18.3216	0	525	0	527	0	530	0	530	0	530	0	530	0	530	0	530	0	530	0	525	0	525	0	530	0	530	0	525	0	0	528.357	0.62553
18.3324	0	525	0	527	0	530	0	530	0	530	0	530	0	530	0	530	0	530	0	525	0	525	0	530	0	530	0	525	0	0	528.357	0.62553
18.3433	0	525	0	527	0	530	0	530	0	530	0	530	0	530	0	530	0	530	0	525	0	525	0	530	0	530	0	525	0	0	528.357	0.62553
18.3541	0	525	0	527	0	530	0	530	0	530	0	530	0	530	0	530	0	530	0	525	0	525	0	530	0	530	0	525	0	0	528.357	0.62553
18.365	0	525	0	527	0	530	0	530	0	530	0	530	0	530	0	530	0	530	0	525	0	525	0	530	0	530	0	525	0	0	528.357	0.62553
18.3759	0	525	0	527	0	530	0	530	0	530	0	530	0	530	0	530	0	530	0	525	0	525	0	530	0	530	0	525	0	0	528.357	0.62553
18.3867	0	525	0	527	0	530	0	530	0	530	0	530	0	530	0	530	0	530	0	525	0	525	0	530	0	530	0	525	0	0	528.357	0.62553
18.3976	0	525	0	527	0	530	0	530	0	530	0	530	0	530	0	530	0	530	0	525	0	525	0	530	0	530	0	525	0	0	528.357	0.62553
18.4084	0	525	0	527	0	530	0	530	0	530	0	530	0	530	0	530	0	530	0	525	0	525	0	530	0	530	0	525	0	0	528.357	0.62553
18.4193	0	525	0	527	0	530	0	530	0	530	0	530	0	530	0	530	0	530	0	525	0	525	0	530	0	530	0	525	0	0	528.357	0.62553
18.4302	0	525	0	527	0	530	0	530	0	530	0	530	0	530	0	530	0	530	0	525	0	525	0	530	0	530	0	525	0	0	528.357	0.62553
18.441	0	525	0	527	0	530	0	530	0	530	0	530	0	530	0	530	0	530	0	525	0	525	0	530	0	530	0	525	0	0	528.357	0.62553
18.4519	0	525	0	527	0	530	0	530	0	530	0	530	0	530	0	530	0	530	0	525	0	525	0	530	0	530	0	525	0	0	528.357	0.62553
18.4627	0	525	0	527	0	530	0	530	0	530	0	530	0	530	0	530	0	530	0	525	0	525	0	530	0	530	0	525	0	0	528.357	0.62553
18.4736	0	525	0	527	0	530	0	530	0	530	0	530	0	530	0	530	0	530	0	525	0	525	0	530	0	530	0	525	0	0	528.357	0.62553
18.4845	0	525	0	527	0	530	0	530	0	530	0	530	0	530	0	530	0	530	0	525	0	525	0	530	0	530	0	525	0	0	528.357	0.62553
18.4953	0	525	0	527	0	530	0	530	0	530	0	530	0	530	0	530	0	530	0	525	0	525	0	530	0	530	0	525	0	0	528.357	0.62553
18.5062	0	525	0	527	0	530	0	530	0	530	0	530	0	530	0	530	0	530	0	525	0	525	0	530	0	530	0	525	0	0	528.357	0.62553
18.517	0	525	0	527	0	530	0	530	0	530	0	530	0	530	0	530	0	530	0	525	0	525	0	530	0	530	0	525	0	0	528.357	0.62553
18.5279	0	525	0	527	0	530	0	530	0	530	0	530	0	530	0	530	0	530	0	525	0	525	0	530	0	530	0	525	0	0	528.357	0.62553
18.5388	0	525	0	527	0	530	0	530	0	530	0	530	0	530	0	530	0	530	0	525	0	525	0	530	0	530	0	525	0	0	528.357	0.62553
18.5496	0	525	0	527	0	530	0	530	0	530	0	530	0	530	0	530	0	530	0	525	0	525	0	530	0	530	0	525	0	0	528.357	0.62553
18.5605	0	525	0	527	0	530	0	530	0	530	0	530	0	530	0	530	0	530	0	525	0	525	0	530	0	530	0	525	0	0	528.357	0.62553
18.5713	0	525	0	527	0	530	0	530	0	530	0	530	0	530	0	530	0	530	0	525	0	525	0	530	0	530	0	525	0	0	528.357	0.62553
18.5822	0	525	0	527	0	530	0	530	0	530	0	530	0	530	0	530	0	530	0	525	0	525	0	530	0	530	0	525	0	0	528.357	0.62553
18.5931	0	525	0	527	0	530	0	530	0	530	0	530	0	530	0	530	0	530	0	525	0	525	0	530	0	530	0	525	0	0	528.357	0.62553
18.6039	0	525	0	527	0	530	0	530	0	530	0	530	0	530	0	530	0	530	0	525	0	525	0	530	0	530	0	525	0	0	528.357	0.62553
18.6148	0	525	0	527	0	530	0	530	0	530	0	530	0	530	0	530	0	530	0	525	0	525	0	530	0	530	0	525	0	0	528.357	0.62553
18.6256	0	525	0	527	0	530	0	530	0	530	0	530	0	530	0	530	0	530	0	525	0	525	0	530	0	530	0	525	0	0	528.357	0.62553
18.6365	0	525	0	527	0	530	0	530	0	530	0	530	0	530	0	530	0	530	0	525	0	525	0	530	0	530	0	525	0	0	528.357	0.62553
18.6474	0	525	0	527	0	530	0	530	0	530	0	530	0	530	0	530	0	530	0	525	0	525	0	530	0	530	0	525	0	0	528.357	0.62553
18.6582	0	525	0	527	0	530	0	530	0	530	0	530	0	530	0	530	0	530	0	525	0	525	0	530	0	530	0	525	0	0	528.357	0.62553
18.6691	0	525	0	527	0	530	0	530	0	530	0	530	0	530	0	530	0	530	0	525	0	525	0	530	0	530	0	525	0	0	528.357	0.62553
18.68	0	525	0	527	0	530	0	530	0	530	0	530	0	530	0	530	0	530	0	525	0	525	0	530	0	530	0	525	0	0	528.357	0.62553
18.6908	0	525	0	527	0	530	0	530	0	530	0	530	0	530	0	530	0	530	0	525	0	525	0	530	0	530	0	525	0	0	528.357	0.62553
18.7017	0	525	0	527	0	530	0	530	0	530	0	530	0	530	0	530	0	530	0	525	0	525	0	530	0	530	0	525	0	0	528.357	0.62553
18.7125	0	525	0	527	0	530	0	530	0	530	0	530	0	530	0	530	0	530	0	525	0	525	0	530	0	530	0	525	0	0	528.357	0.62553
18.7234	0	525	0	527	0	530	0	530	0	530	0	530	0	530	0	530	0	530	0	525	0	525	0	530	0	530	0	525	0	0	528.357	0.62553
18.7343	0	525	0	527	0	530	0	530	0	530	0	530	0	530	0	530	0	530	0	525	0	525	0	530	0	530	0	525	0	0	528.357	0.62553
18.7451	0	525	0	527	0	530	0	530	0	530	0	530	0	530	0	530	0	530	0	525	0	525	0	530	0	530	0	525	0	0	528.357	0.62553
18.756	0	525	0	527	0	530	0	530	0	530	0	530	0	530	0	530	0	530	0	525	0	525	0	530	0	530	0	525	0	0	528.357	0.62553
18.7668	0	525	0	527	0	530	0	530	0	530	0	530	0	530	0	530	0	530	0	525	0	525	0	530	0	530	0	525	0	0	528.357	0.62553
18.7777	0	525	0	527	0	530	0	530	0	530	0	530	0	530	0	530	0	530	0	525	0	525	0	530	0	530	0	525	0	0	528.357	0.62553
18.7886	0	525	0	527	0	530	0	530	0	530	0	530	0	530	0	530	0	530	0	525	0	525	0	530	0	530	0	525	0	0	528.357	0.62553
18.7994	0	525	0	527	0	530	0	530	0	530	0	530	0	530	0	530	0	530	0	525	0	525	0	530	0	530	0	525	0	0	528.357	0.62553
18.8103	0	525	0	527	0	530	0	530	0	530	0	530	0	530	0	530	0	530	0	525	0	525	0	530	0	530	0	525	0	0	528.357	0.62553
18.8211	0	525	0	527	0	530	0	530	0	530	0	530	0	530	0	530	0	530	0	525	0	525	0	530	0	530	0	525	0	0	528.357	0.62553
18.832	0	525	0	527	0	530	0	530	0	530	0	530	0	530	0	530	0	530	0	525	0	525	0	530	0	530	0	525	0	0	528.357	0.62553
18.8429	0	525	0	527	0	530	0	530	0	530	0	530	0	530	0	530	0	530	0	525	0	525	0	530	0	530	0	525	0	0	528.357	0.62553
18.8537	0	525	0	527	0	530	0	530	0	530	0	530	0	530	0	530	0	530	0	525	0	525	0	530	0	530	0	525	0	0	528.357	0.62553
18.8646	0	525	0	527	0	530	0	530	0	530	0	530	0	530	0	530	0	530	0	525	0	525	0	530	0	530	0	525	0	0	528.357	0.62553
18.8754	0	525	0	527	0	530	0	530	0	530	0	530	0	530	0	530	0	530	0	525	0	525	0	530	0	530	0	525	0	0	528.357	0.62553
18.8863	0	525	0	527	0	530	0	530	0	530	0	530	0	530	0	530	0	530	0	525	0	525	0	530	0	530	0	525	0	0	528.357	0.62553
18.8972	0	525	0	527	0	530	0	530	0	530	0	530	0	530	0	530	0	530	0	525	0	525	0	530	0	530	0	525	0	0	528.357	0.62553
18.908	0	525	0	527	0	530	0	530	0	530	0	530	0	530	0	530	0	530	0	525	0	525	0	530	0	530	0	525	0	0	528.357	0.62553
18.9189	0	525	0	527	0	530	0	530	0	530	0	530	0	530	0	530	0	530	0	525	0	525	0	530	0	530	0	525	0	0	528.357	0.62553
18.9297	0	525	0	527	0	530	0	530	0	530	0	530	0	530	0	530	0	530	0	525	0	525	0	530	0	530	0	525	0	0	528.357	0.62553
18.9406	0	525	0	527	0	530	0	530	0	530	0	530	0	530	0	530	0	530	0	525	0	525	0	530	0	530	0	525	0	0	528.357	0.62553
18.9515	0	525	0	527	0	530	0	530	0	530	0	530	0	530	0	530	0	530	0	525	0	525	0	530	0	530	0	525	0	0	528.357	0.62553
18.9623	0	525	0	527	0	530	0	530	0	530	0	530	0	530	0	530	0	530	0	525	0	525	0	530	0	530	0	525	0	0	528.357	0.62553
18.9732	0	525	0	527	0	530	0	530	0	530	0	530	0	530	0	530	0	530	0	525	0	525	0	530	0	530	0	525	0	0	528.357	0.62553
18.984	0	525	0	527	0	530	0	530	0	530	0	530	0	530	0	530	0	530	0	525	0	525	0	530	0	530	0	525	0	0	528.357	0.62553
18.9949	0	525	0	527	0	530	0	530	0	530	0	530	0	530	0	530	0	530	0	525	0	525	0	530	0	530	0	525	0	0	528.357	0.62553
19.0058	0	525	0	527	0	530	0	530	0	530	0	530	0	530	0	530	0	530	0	525	0	525	0	530	0	530	0	525	0	0	528.357	0.62553
19.0166	0	525	0	527	0	530	0	530	0	530	0	530	0	530	0	530	0	530	0	525	0	525	0	530	0	530	0	525	0	0	528.357	0.62553
19.0275	0	525	0	527	0	530	0	530	0	530	0	530	0	530	0	530	0	530	0	525	0	525	0	530	0	530	0	525	0	0	528.357	0.62553
19.0383	0	525	0	527	0	530	0	530	0	530	0	530	0	530	0	530	0	530	0	525	0	525	0	530	0	530	0	525	0	0	528.357	0.62553
19.0492	0	525	0	527	0	530	0	530	0	530	0	530	0	530	0	530	0	530	0	525	0	525	0	530	0	530	0	525	0	0	528.357	0.62553
19.0601	0	525	0	527	0	530	0	530	0	530	0	530	0	530	0	530	0	530	0	525	0	525	0	530	0	530	0	525	0	0	528.357	0.62553
19.0709	0	525	0	527	0	530	0	530	0	530	0	530	0	530	0	530	0	530	0	525	0	525	0	530	0	530	0	525	0	0	528.357	0.62553
19.0818	0	525	0	527	0	530	0	530	0	530	0	530	0	530	0	530	0	530	0	525	0	525	0	530	0	530	0	525	0	0	528.357	0.62553
19.0926	0	525	0	527	0	530	0	530	0	530	0	530	0	530	0	530	0	530	0	525	0	525	0	530	0	530	0	525	0	0	528.357	0.62553
19.1035	0	525	0	527	0	530	0	530	0	530	0	530	0	530	0	530	0	530	0	525	0	525	0	530	0	530	0	525	0	0	528.357	0.62553
19.1144	0	525	0	527	0	530	0	530	0	530	0	530	0	530	0	530	0	530	0	525	0	525	0	530	0	530	0	525	0	0	528.357	0.62553
19.1252	0	525	0	527	0	530	0	530	0	530	0	530	0	530	0	530	0	530	0	525	0	525	0	530	0	530	0	525	0	0	528.357	0.62553
19.1361	0	525	0	527	0	530	0	530	0	530	0	530	0	530	0	530	0	530	0	525	0	525	0	530	0	530	0	525	0	0	528.357	0.62553
19.1469	0	525	0	527	0	530	0	530	0	530	0	530	0	530	0	530	0	530	0	525	0	525	0	530	0	530	0	525	0	0	528.357	0.62553
19.1578	0	525	0	527	0	530	0	530	0	530	0	530	0	530	0	530	0	530	0	525	0	525	0	530	0	530	0	525	0	0	528.357	0.62553
19.1687	0	525	0	527	0	530	0	530	0	530	0	530	0	530	0	530	0	530	0	525	0	525	0	530	0	530	0	525	0	0	528.357	0.62553
19.1795	0	525	0	527	0	530	0	530	0	530	0	530	0	530	0	530	0	530	0	525	0	525	0	530	0	530	0	525	0	0	528.357	0.62553
19.1904	0	525	0	527	0	530	0	530	0	530	0	530	0	530	0	530	0	530	0	525	0	525	0	530	0	530	0	525	0	0	528.357	0.62553
19.2013	0	525	0	527	0	530	0	530	0	530	0	530	0	530	0	530	0	530	0	525	0	525	0	530	0	530	0	525	0	0	528.357	0.62553
19.2121	0	525	0	527	0	530	0	530	0	530	0	530	0	530	0	530	0	530	0	525	0	525	0	530	0	530	0	525	0	0	528.357	0.62553
19.223	0	525	0	527	0	530	0	530	0	530	0	530	0	530	0	530	0	530	0	525	0	525	0	530	0	530	0	525	0	0	528.357	0.62553
19.2338	0	525	0	527	0	530	0	530	0	530	0	530	0	530	0	530	0	530	0	525	0	525	0	530	0	530	0	525	0	0	528.357	0.62553
19.2447	0	525	0	527	0	530	0	530	0	530	0	530	0	530	0	530	0	530	0	525	0	525	0	530	0	530	0	525	0	0	528.357	0.62553
19.2556	0	525	0	527	0	530	0	530	0	530	0	530	0	530	0	530	0	530	0	525	0	525	0	530	0	530	0	525	0	0	528.357	0.62553
19.2664	0	525	0	527	0	530	0	530	0	530	0	530	0	530	0	530	0	530	0	525	0	525	0	530	0	530	0	525	0	0	528.357	0.62553
19.2773	0	525	0	527	0	530	0	530	0	530	0	530	0	530	0	530	0	530	0	525	0	525	0	530	0	530	0	525	0	0	528.357	0.62553
19.2881	0	525	0	527	0	530	0	530	0	530	0	530	0	530	0	530	0	530	0	525	0	525	0	530	0	530	0	525	0	0	528.357	0.62553
19.299	0	525	0	527	0	530	0	530	0	530	0	530	0	530	0	530	0	530	0	525	0	525	0	530	0	530	0	525	0	0	528.357	0.62553
19.3099	0	525	0	527	0	530	0	530	0	530	0	530	0	530	0	530	0	530	0	525	0	525	0	530	0	530	0	525	0	0	528.357	0.62553
19.3207	0	525	0	527	0	530	0	530	0	530	0	530	0	530	0	530	0	530	0	525	0	525	0	530	0	530	0	525	0	0	528.357	0.62553
19.3316	0	525	0	527	0	530	0	530	0	530	0	530	0	530	0	530	0	530	0	525	0	525	0	530	0	530	0	525	0	0	528.357	0.62553
19.3424	0	525	0	527	0	530	0	530	0	530	0	530	0	530	0	530	0	530	0	525	0	525	0	530	0	530	0	525	0	0	528.357	0.62553
19.3533	0	525	0	527	0	530	0	530	0	530	0	530	0	530	0	530	0	530	0	525	0	525	0	530	0	530	0	525	0	0	528.357	0.62553
19.3642	0	525	0	527	0	530	0	530	0	530	0	530	0	530	0	530	0	530	0	525	0	525	0	530	0	530	0	525	0	0	528.357	0.62553
19.375	0	525	0	527	0	530	0	530	0	530	0	530	0	530	0	530	0	530	0	525	0	525	0	530	0	530	0	525	0	0	528.357	0.62553
19.3859	0	525	0	527	0	530	0	530	0	530	0	530	0	530	0	530	0	530	0	525	0	525	0	530	0	530	0	525	0	0	528.357	0.62553
19.3967	0	525	0	527	0	530	0	530	0	530	0	530	0	530	0	530	0	530	0	525	0	525	0	530	0	530	0	525	0	0	528.357	0.62553
19.4076	0	525	0	527	0	530	0	530	0	530	0	530	0	530	0	530	0	530	0	525	0	525	0	530	0	530	0	525	0	0	528.357	0.62553
19.4185	0	525	0	527	0	530	0	530	0	530	0	530	0	530	0	530	0	530	0	525	0	525	0	530	0	530	0	525	0	0	528.357	0.62553
19.4293	0	525	0	527	0	530	0	530	0	530	0	530	0	530	0	530	0	530	0	525	0	525	0	530	0	530	0	525	0	0	528.357	0.62553
19.4402	0	525	0	527	0	530	0	530	0	530	0	530	0	530	0	530	0	530	0	525	0	525	0	530	0	530	0	525	0	0	528.357	0.62553
19.451	0	525	0	527	0	530	0	530	0	530	0	530	0	530	0	530	0	530	0	525	0	525	0	530	0	530	0	525	0	0	528.357	0.62553
19.4619	0	525	0	527	0	530	0	530	0	530	0	530	0	530	0	530	0	530	0	525	0	525	0	530	0	530	0	525	0	0	528.357	0.62553
19.4728	0	525	0	527	0	530	0	530	0	530	0	530	0	530	0	530	0	530	0	525	0	525	0	530	0	530	0	525	0	0	528.357	0.62553
19.4836	0	525	0	527	0	530	0	530	0	530	0	530	0	530	0	530	0	530	0	525	0	525	0	530	0	530	0	525	0	0	528.357	0.62553
19.4945	0	525	0	527	0	530	0	530	0	530	0	530	0	530	0	530	0	530	0	525	0	525	0	530	0	530	0	525	0	0	528.357	0.62553
19.5053	0	525	0	527	0	530	0	530	0	530	0	530	0	530	0	530	0	530	0	525	0	525	0	530	0	530	0	525	0	0	528.357	0.62553
19.5162	0	525	0	527	0	530	0	530	0	530	0	530	0	530	0	530	0	530	0	525	0	525	0	530	0	530	0	525	0	0	528.357	0.62553
19.5271	0	525	0	527	0	530	0	530	0	530	0	530	0	530	0	530	0	530	0	525	0	525	0	530	0	530	0	525	0	0	528.357	0.62553
19.5379	0	525	0	527	0	530	0	530	0	530	0	530	0	530	0	530	0	530	0	525	0	525	0	530	0	530	0	525	0	0	528.357	0.62553
19.5488	0	525	0	527	0	530	0	530	0	530	0	530	0	530	0	530	0	530	0	525	0	525	0	530	0	530	0	525	0	0	528.357	0.62553
19.5596	0	525	0	527	0	530	0	530	0	530	0	530	0	530	0	530	0	530	0	525	0	525	0	530	0	530	0	525	0	0	528.357	0.62553
19.5705	0	525	0	527	0	530	0	530	0	530	0	530	0	530	0	530	0	530	0	525	0	525	0	530	0	530	0	525	0	0	528.357	0.62553
19.5814	0	525	0	527	0	530	0	530	0	530	0	530	0	530	0	530	0	530	0	525	0	525	0	530	0	530	0	525	0	0	528.357	0.62553
19.5922	0	525	0	527	0	530	0	530	0	530	0	530	0	530	0	530	0	530	0	525	0	525	0	530	0	530	0	525	0	0	528.357	0.62553
19.6031	0	525	0	527	0	530	0	530	0	530	0	530	0	530	0	530	0	530	0	525	0	525	0	530	0	530	0	525	0	0	528.357	0.62553
19.6139	0	525	0	527	0	530	0	530	0	530	0	530	0	530	0	530	0	530	0	525	0	525	0	530	0	530	0	525	0	0	528.357	0.62553
19.6248	0	525	0	527	0	530	0	530	0	530	0	530	0	530	0	530	0	530	0	525	0	525	0	530	0	530	0	525	0	0	528.357	0.62553
19.6357	0	525	0	527	0	530	0	530	0	530	0	530	0	530	0	530	0	530	0	525	0	525	0	530	0	530	0	525	0	0	528.357	0.62553
19.6465	0	525	0	527	0	530	0	530	0	530	0	530	0	530	0	530	0	530	0	525	0	525	0	530	0	530	0	525	0	0	528.357	0.62553
19.6574	0	525	0	527	0	530	0	530	0	530	0	530	0	530	0	530	0	530	0	525	0	525	0	530	0	530	0	525	0	0	528.357	0.62553
19.6682	0	525	0	527	0	530	0	530	0	530	0	530	0	530	0	530	0	530	0	525	0	525	0	530	0	530	0	525	0	0	528.357	0.62553
19.6791	0	525	0	527	0	530	0	530	0	530	0	530	0	530	0	530	0	530	0	525	0	525	0	530	0	530	0	525	0	0	528.357	0.62553
19.69	0	525	0	527	0	530	0	530	0	530	0	530	0	530	0	530	0	530	0	525	0	525	0	530	0	530	0	525	0	0	528.357	0.62553
19.7008	0	525	0	527	0	530	0	530	0	530	0	530	0	530	0	530	0	530	0	525	0	525	0	530	0	530	0	525	0	0	528.357	0.62553
19.7117	0	525	0	527	0	530	0	530	0	530	0	530	0	530	0	530	0	530	0	525	0	525	0	530	0	530	0	525	0	0	528.357	0.62553
19.7226	0	525	0	527	0	530	0	530	0	530	0	530	0	530	0	530	0	530	0	525	0	525	0	530	0	530	0	525	0	0	528.357	0.62553
19.7334	0	525	0	527	0	530	0	530	0	530	0	530	0	530	0	530	0	530	0	525	0	525	0	530	0	530	0	525	0	0	528.357	0.62553
19.7443	0	525	0	527	0	530	0	530	0	530	0	530	0	530	0	530	0	530	0	525	0	525	0	530	0	530	0	525	0	0	528.357	0.62553
19.7551	0	525	0	527	0	530	0	530	0	530	0	530	0	530	0	530	0	530	0	525	0	525	0	530	0	530	0	525	0	0	528.357	0.62553
19.766	0	525	0	527	0	530	0	530	0	530	0	530	0	530	0	530	0	530	0	525	0	525	0	530	0	530	0	525	0	0	528.357	0.62553
19.7769	0	525	0	527	0	530	0	530	0	530	0	530	0	530	0	530	0	530	0	525	0	525	0	530	0	530	0	525	0	0	528.357	0.62553
19.7877	0	525	0	527	0	530	0	530	0	530	0	530	0	530	0	530	0	530	0	525	0	525	0	530	0	530	0	525	0	0	528.357	0.62553
19.7986	0	525	0	527	0	530	0	530	0	530	0	530	0	530	0	530	0	530	0	525	0	525	0	530	0	530	0	525	0	0	528.357	0.62553
19.8094	0	525	0	527	0	530	0	530	0	530	0	530	0	530	0	530	0	530	0	525	0	525	0	530	0	530	0	525	0	0	528.357	0.62553
19.8203	0	525	0	527	0	530	0	530	0	530	0	530	0	530	0	530	0	530	0	525	0	525	0	530	0	530	0	525	0	0	528.357	0.62553
19.8312	0	525	0	527	0	530	0	530	0	530	0	530	0	530	0	530	0	530	0	525	0	525	0	530	0	530	0	525	0	0	528.357	0.62553
19.842	0	525	0	527	0	530	0	530	0	530	0	530	0	530	0	530	0	530	0	525	0	525	0	530	0	530	0	525	0	0	528.357	0.62553
19.8529	0	525	0	527	0	530	0	530	0	530	0	530	0	530	0	530	0	530	0	525	0	525	0	530	0	530	0	525	0	0	528.357	0.62553
19.8637	0	525	0	527	0	530	0	530	0	530	0	530	0	530	0	530	0	530	0	525	0	525	0	530	0	530	0	525	0	0	528.357	0.62553
19.8746	0	525	0	527	0	530	0	530	0	530	0	530	0	530	0	530	0	530	0	525	0	525	0	530	0	530	0	525	0	0	528.357	0.62553
19.8855	0	525	0	527	0	530	0	530	0	530	0	530	0	530	0	530	0	530	0	525	0	525	0	530	0	530	0	525	0	0	528.357	0.62553
19.8963	0.46	525	1.64	527	-0.43	530	-0.95	530	0.35	530	-1.09	530	-1.42	530	0.01	530	4.9	530	5.45	525	-2.55	525	-0.74	530	0.05	530	-0.77	525	0.350714	0.60652	528.357	0.62553
19.9072	-0.29	525	2.46	527	-0.77	530	-0.87	530	0.2	530	-1.19	530	-0.95	530	0.02	530	4.9	530	5.68	525	-2.58	525	-0.81	530	0.18	530	-0.58	525	0.385714	0.627726	528.357	0.62553
19.918	0.01	525	1.77	525	-0.17	530	-0.47	530	-0.25	530	-0.7	531	-1.7	530	0.44	530	4.72	526	5.25	520	-3	527	-1.27	530	0.42	530	-1.12	525	0.280714	0.610352	527.786	0.852782
19.9289	-0.93	525	2.12	524	-0.65	530	0.04	530	-0.28	530	-0.94	531	-1.19	530	0.05	530	4.27	522	5.7	515	-2.74	529	-0.94	530	0.57	530	-0.78	525	0.307143	0.606244	527.214	1.21429
19.9398	0.36	525	1.63	522	-0.97	530	-0.65	530	0.07	530	-0.68	531	-1.48	531	-0.33	530	4.4	518	5.62	510	-2.46	531	-0.97	530	0.76	530	-1.04	525	0.304286	0.598608	526.643	1.6628
19.9506	0.29	525	1.6	521	-0.91	530	0.02	530	0.22	530	-0.54	531	-1.55	532	0.28	530	4.68	514	4.67	505	-2.91	533	-0.62	530	0.2	530	-1.97	525	0.247143	0.583298	526.143	2.11965
19.9615	-0.02	525	1.19	520	-0.22	530	-0.43	530	0.36	530	-0.68	531	-1.44	533	-0.47	530	4.65	510	5.07	501	-2.45	535	-0.96	530	0.5	530	-0.55	526	0.325	0.563844	525.786	2.53368
19.9723	0.06	525	1.14	519	-0.9	530	-0.25	530	-0.09	530	-0.19	531	-0.88	534	-0.02	530	4.66	506	4.78	496	-2.52	537	-1.2	530	0.49	530	-0.53	526	0.325	0.546675	525.286	3.00993
19.9832	0.23	525	1.15	518	-0.5	530	-0.57	530	0.26	530	-0.72	531	-0.07	534	-0.41	530	4.29	502	4.99	492	-3.04	539	-0.73	530	0.32	530	-0.85	526	0.310714	0.551029	524.786	3.42129
19.9941	0.26	525	1.17	517	-1.01	530	-0.68	530	0.03	530	-0.96	531	-0.72	534	-0.19	530	4.04	498	5.16	488	-2.48	542	-0.96	530	0.63	530	-0.48	526	0.272143	0.544733	524.357	3.86106
20.0049	-0.01	525	1.12	516	-0.52	530	-0.66	530	-0.14	530	-1.06	531	0.19	534	0.08	530	3.91	494	4.68	483	-2.49	544	-0.95	530	0.32	530	-0.8	526	0.262143	0.509361	523.786	4.33131
20.0158	0.15	525	0.79	515	-0.7	530	-0.75	530	-0.61	530	-1.08	531	-0.73	534	0.44	530	3.81	491	4.96	479	-2.13	546	-1.27	530	0.28	530	-0.74	526	0.172857	0.521195	523.357	4.71333
20.0266	0.19	525	0.68	515	-0.36	530	-0.73	530	-0.4	530	-1.03	532	-0.34	534	0.07	530	4.28	488	4.87	475	-2.02	548	-1.05	530	0.42	530	-0.5	526	0.291429	0.518652	523.071	5.09629
20.0375	-0.08	525	-0.34	515	-0.92	530	-0.7	530	0.14	530	-0.26	533	-0.44	534	-0.15	530	3.95	484	4.64	471	-1.97	550	-0.8	531	0.66	530	-0.97	526	0.197143	0.493068	522.786	5.52733
20.0484	0.01	525	1.11	515	-0.75	530	-0.59	530	0.05	530	-1.38	533	-0.6	534	-0.1	530	3.7	481	4.8	467	-2.18	551	-0.67	531	0.25	530	-0.44	526	0.229286	0.502035	522.357	5.87658
20.0592	-0.74	525	0.38	515	-0.96	530	-0.4	530	-0.18	530	-1.43	533	0.66	534	0.21	530	4.2	478	5.04	463	-2.06	553	-0.85	531	0.26	530	-0.63	526	0.25	0.534151	522	6.25379
20.0701	0.35	525	0.3	515	-0.32	530	-1.01	530	0.32	530	-0.47	534	0.42	534	0.13	530	3.92	474	4.65	458	-1.92	555	-0.98	531	0.42	530	-0.84	526	0.355	0.483832	521.571	6.7325
20.0809	-0.02	525	0.31	515	-1.06	530	-1.14	530	0.65	530	-1.29	534	-0.03	534	-0.12	530	4.23	471	4.26	454	-1.66	556	-0.69	531	0.87	530	-0.7	526	0.257857	0.49286	521.143	7.08415
20.0918	-0.42	525	0.55	515	-0.42	530	-0.72	531	0.52	530	-0.57	534	-0.28	534	0.13	530	4.47	467	3.92	450	-1.72	557	-1.12	531	0.82	530	-0.37	526	0.342143	0.47228	520.714	7.4829
20.1027	-0.11	525	0.19	515	-1.22	530	-0.35	531	0.09	530	-0.75	534	0.57	534	0.02	530	4.08	463	3.63	447	-1.74	558	-0.8	531	0.51	530	0.12	526	0.302857	0.438756	520.286	7.82391
20.1135	0.75	525	-0.54	515	-1.3	530	-0.68	531	0.11	530	0.62	534	-0.52	534	0.31	530	3.95	459	2.22	444	-1.93	559	-1.31	531	0.61	530	-0.02	526	0.162143	0.404275	519.857	8.16644
20.1244	-0.14	525	-0.25	515	0	531	-0.16	531	-0.29	530	-0.73	534	0.02	534	-0.69	530	3.44	456	1.92	442	-1.64	560	-0.86	531	0.56	530	0.1	526	0.0914286	0.334442	519.643	8.42524
20.1352	0	525	0.47	515	0.13	531	-0.56	531	0.49	530	-0.6	534	-0.63	534	0.09	530	3.4	453	0.64	441	-1.91	561	-0.9	531	0.89	530	0.28	526	0.127857	0.319906	519.429	8.62765
20.1461	-0.15	525	-0.04	515	-0.35	531	0.18	531	-0.08	530	-0.8	534	0.27	534	0.07	530	2.86	450	0.11	441	-1.66	562	-1.14	531	0.33	530	-0.08	526	-0.0342857	0.269808	519.286	8.78274
20.157	-0.37	525	0.35	515	-0.99	531	-0.26	531	0.23	530	-0.51	534	-0.54	534	-0.36	530	1.93	448	-0.38	441	-1.24	563	-0.96	531	0.46	530	-0.3	526	-0.21	0.210363	519.214	8.89696
20.1678	-0.41	525	0.56	515	-0.78	531	-0.64	531	0.18	530	-0.29	534	0.23	534	-0.05	530	1.69	447	-1.44	441	-1.6	564	-1.27	531	0.2	530	-0.69	526	-0.307857	0.233975	519.214	8.96831
20.1787	0.11	525	0.05	515	-0.32	531	-0.17	531	0.58	530	-0.13	534	-0.26	534	-0.24	530	0.7	446	-1.15	441	-1.3	565	-0.64	531	0.5	530	-0.63	526	-0.207143	0.158681	519.214	9.04031
20.1896	-0.68	525	0.32	515	-1.4	531	-1.48	531	-0.6	530	-0.66	534	-0.19	534	-0.18	530	0.14	446	-1.67	442	-1.06	566	-0.97	531	0.51	530	-0.04	526	-0.568571	0.184393	519.357	9.0211
20.2004	-0.36	525	-0.16	515	-0.36	531	-0.05	531	-0.35	530	-0.32	534	-0.82	534	0.17	530	0.38	446	-1.92	443	-0.64	567	-0.9	531	0.63	530	0.04	526	-0.332857	0.167583	519.5	9.0029
20.2113	0.81	525	0.42	515	-0.24	531	-0.75	531	-0.52	530	-0.19	534	-0.04	534	-0.07	530	-0.01	446	-1.85	444	-0.52	567	-1.1	531	0.49	530	-0.56	526	-0.295	0.181628	519.571	8.95637
20.2221	0.17	525	0.6	515	-0.74	531	0.35	531	0.43	530	-0.05	534	0.38	534	0.08	530	-0.88	446	-1.67	445	-0.68	567	-1.42	531	0.51	530	-0.61	526	-0.252143	0.198641	519.643	8.91018
20.233	-0.41	525	0.74	515	-0.2	531	-0.31	531	0.36	530	-0.42	534	0.21	534	-0.09	530	-0.68	446	-1.01	446	-0.18	567	-1.33	532	0.7	530	-1.12	526	-0.267143	0.169665	519.786	8.8716
20.2439	0.45	525	-0.54	515	-0.07	531	-0.02	531	0.13	530	-0.37	534	-0.56	534	-0.38	530	-0.31	446	-1.21	447	-0.61	567	-0.91	533	0.2	530	-0.53	526	-0.337857	0.119395	519.929	8.83392
20.2547	0.17	525	0	515	-0.95	531	0.43	531	-0.26	530	-1.25	534	-0.5	534	0.5	530	-1.02	446	-0.71	448	-0.74	567	-0.91	533	0.42	530	-0.73	526	-0.396429	0.160283	520	8.78873
20.2656	0.07	525	0.14	515	-0.28	531	-0.45	531	0.17	530	-0.78	534	-0.92	534	-0.47	530	-1.58	446	-0.04	448	-0.75	567	-1.25	533	0.13	530	-1.29	526	-0.521429	0.157375	520	8.78873
20.2764	0.7	525	0.21	515	-0.63	531	-0.17	531	0.1	530	-0.83	534	-0.14	534	-0.39	530	-1.25	447	0.05	448	-0.43	567	-0.76	533	0.12	530	-0.81	526	-0.302143	0.139671	520.071	8.74264
20.2873	0.06	525	0.13	515	-0.4	531	-0.89	531	-0.55	530	-1.21	534	0.1	534	-0.11	530	-0.59	448	-0.16	448	-0.2	567	-0.68	533	0.1	530	-1.04	526	-0.388571	0.119871	520.143	8.69688
20.2982	0.52	525	-0.44	515	-0.8	531	0.11	531	0.18	530	-0.45	534	-0.31	534	-0.17	530	-0.75	448	1.02	448	-0.42	567	-0.93	533	0.23	530	-0.34	526	-0.182143	0.144956	520.143	8.69688
20.309	0.25	525	-0.08	515	-0.91	531	0	531	-0.09	530	-0.74	534	0.26	534	-0.08	530	-0.37	448	0.41	448	0.06	567	-0.93	533	-0.02	530	-1.33	526	-0.255	0.139842	520.143	8.69688
20.3199	0.17	525	0.16	515	-0.39	531	0.01	531	-0.95	530	-0.86	534	-0.69	534	0.03	530	-0.14	448	1.3	448	-0.23	567	-1	533	0.15	530	-0.89	526	-0.237857	0.167575	520.143	8.69688
20.3307	-0.42	525	-0.39	515	-1.45	531	-0.45	531	0.19	530	-0.02	534	0.01	534	-0.07	530	-0.16	448	1.36	448	-0.16	567	-0.89	533	0.4	530	-0.79	526	-0.202857	0.175034	520.143	8.69688
20.3416	-0.27	525	0.15	515	-0.97	531	-0.73	531	0.28	530	-1.08	534	-0.65	534	-0.3	530	0.38	448	1.49	447	-0.24	567	-0.85	533	0.4	530	-0.64	526	-0.216429	0.187302	520.071	8.74264
20.3525	-0.1	525	0.54	515	-0.76	531	-0.24	531	0.71	530	-1.08	534	-0.49	534	-0.37	530	0.37	448	2.11	446	-0.01	567	-0.8	533	0.58	530	-0.73	526	-0.0192857	0.22333	520	8.78873
20.3633	0.67	525	0.09	515	-0.07	531	0.21	531	0.12	530	-0.55	535	-0.78	534	0.03	530	0.52	448	1.25	444	-0.22	567	-1.07	533	0.34	530	-0.28	526	0.0185714	0.1598	519.929	8.89095
20.3742	-0.62	525	0.02	515	-0.25	531	0.5	531	-0.31	530	-0.2	535	-0.59	534	-0.47	530	0.3	448	2.06	443	-0.08	567	-1.05	533	0.16	530	-0.9	526	-0.102143	0.203465	519.857	8.93804
20.385	0.54	525	0.06	515	-0.89	531	0.62	531	-0.51	530	-0.29	535	-0.22	534	-0.39	530	0.31	448	1.77	441	-0.09	567	-0.81	534	0.65	530	-0.61	526	0.01	0.191908	519.786	9.04153
20.3959	-0.17	525	0.45	515	-0.96	531	0.41	531	-0.45	530	-0.11	535	-0.83	534	0.24	530	0.93	448	1.59	440	0.08	567	-0.79	534	0.33	530	-0.75	526	-0.00214286	0.195794	519.714	9.08956
20.4068	0.3	525	0.89	515	-0.3	531	0.2	531	-0.41	530	-0.29	535	-0.35	534	-0.58	530	1.27	448	1.27	439	0.21	567	-1.18	534	0.88	530	-0.92	526	0.0707143	0.208821	519.643	9.1379
20.4176	-0.01	525	0.41	515	-0.26	531	-0.01	531	-0.15	530	-0.65	535	-0.85	534	-0.54	530	1.03	448	0.79	438	0.1	567	-1.03	534	0.37	530	-0.55	526	-0.0964286	0.161724	519.571	9.18654
20.4285	0.44	525	-0.21	515	-0.93	531	-0.68	531	-0.54	530	-0.5	535	-0.19	534	-0.65	530	1.3	447	0.85	438	0.55	567	-0.89	535	0.97	530	-1.08	526	-0.111429	0.209733	519.571	9.23843
20.4393	0.88	525	-0.54	515	-0.62	531	-0.57	531	-0.76	530	0.29	535	0.26	534	-0.29	530	1.14	446	0.64	438	0.29	567	-0.82	535	0.47	530	-0.47	526	-0.00714286	0.173767	519.5	9.28176
20.4502	0.15	525	-0.75	515	-0.67	531	-0.13	531	0.13	530	-0.46	535	-0.1	534	-0.19	530	1.25	445	0.27	438	0.23	567	-1.01	535	0.24	530	-0.53	526	-0.112143	0.151843	519.429	9.32544
20.4611	0	525	-0.06	515	0.34	531	-0.72	531	-1.04	530	-0.03	535	0.28	534	-0.57	530	1.45	444	0.37	438	-0.13	567	-0.92	535	0.55	530	-0.19	526	-0.0478571	0.174353	519.357	9.36947
20.4719	0.99	525	-0.26	515	-0.57	531	-0.22	531	-0.57	530	-0.32	535	-0.53	534	-0.33	530	0.58	443	0.18	438	0.36	567	-0.67	535	0.44	530	-1.19	526	-0.150714	0.156842	519.286	9.41382
20.4828	0.1	525	-0.07	515	-0.31	531	-0.61	531	-0.92	530	-0.45	535	-0.92	534	0.12	530	1.31	443	-0.36	438	0.46	567	-0.87	535	0.74	530	-0.67	526	-0.175	0.178127	519.286	9.41382
20.4936	0.45	525	-0.49	515	-1.15	531	-0.55	531	-0.26	530	-0.33	535	0.12	534	-0.23	530	1	443	-0.16	438	0.43	567	-1.12	535	0.43	530	-0.53	526	-0.170714	0.162975	519.286	9.41382
20.5045	0.6	525	0.54	515	-0.86	531	0.16	531	-0.43	530	-0.96	535	0.63	534	-0.08	530	1.04	443	0.26	438	0.69	567	-0.18	535	0.73	530	-1.3	526	0.06	0.192679	519.286	9.41382
20.5154	-0.21	525	-0.5	515	-0.38	531	-0.36	531	-0.89	530	-0.24	535	-0.62	534	-0.07	530	1.28	443	0.65	438	0.46	567	-0.66	535	0.54	530	-0.39	526	-0.0992857	0.162753	519.286	9.41382
20.5262	0.2	525	-0.93	515	-0.13	531	-0.4	531	-0.7	530	-0.58	535	-0.49	534	-0.61	530	1.02	442	0.14	438	0.13	567	-0.85	535	0.46	530	-1.04	526	-0.27	0.158849	519.214	9.45851
20.5371	0.35	525	0.34	515	-0.47	531	0.19	531	-0.64	530	-0.36	535	-0.12	534	-0.62	530	0.87	441	0.16	438	0.55	567	-0.54	535	0.49	530	-0.96	526	-0.0542857	0.14695	519.143	9.50353
20.5479	-0.58	525	-0.7	515	0.19	531	0.25	531	-0.11	530	-0.54	535	-0.46	534	-0.19	530	0.71	441	0.35	438	0.8	567	-0.82	535	0.66	530	-0.38	526	-0.0585714	0.147271	519.143	9.50353
20.5588	-0.26	525	0.48	515	-0.56	531	-0.69	531	-0.66	530	0.33	535	-0.4	534	-0.7	530	0.95	441	0.36	438	0.47	567	-0.49	535	0.57	530	-0.69	526	-0.0921429	0.156497	519.143	9.50353
20.5697	0.17	525	-0.33	515	-0.75	531	0.07	531	-1.06	530	-0.42	535	-0.36	534	-0.29	530	0.61	441	0.28	438	0.39	567	-0.73	535	0.4	530	-0.65	526	-0.190714	0.137235	519.143	9.50353
20.5805	0.37	525	0.11	515	-0.3	531	-0.72	531	-0.15	530	-0.02	535	0.15	534	-0.61	530	0.81	441	0.12	438	0.34	567	-0.84	535	0.73	530	-1.01	526	-0.0728571	0.150918	519.143	9.50353
20.5914	0.41	525	0.11	515	-0.44	531	-0.1	531	-0.53	530	0.21	535	-0.32	534	-0.63	530	1.41	441	0.11	438	0.9	567	-0.71	535	0.58	530	-0.96	526	0.00285714	0.178213	519.143	9.50353
20.6022	-0.01	525	-0.3	515	-0.88	531	-0.49	531	-0.17	530	-0.2	535	-0.91	534	-0.43	530	1.22	441	0.7	438	0.91	567	-0.82	535	1.14	530	-1.61	526	-0.132143	0.226204	519.143	9.50353
20.6131	0.28	525	0.16	515	-0.76	531	0.42	531	-0.26	530	-0.33	535	-0.53	534	-0.58	530	1.25	440	0.35	438	0.87	567	-0.67	535	0.59	530	-1.06	526	-0.0192857	0.181706	519.071	9.54887
20.624	0.9	525	1.03	515	-0.1	531	0.24	531	-0.74	530	-0.08	535	-1.23	534	-0.53	530	0.88	439	0.07	438	0.5	567	-0.95	535	0.3	530	-1.27	527	-0.07	0.207714	519.071	9.5988
20.6348	0.74	525	-0.55	515	0.05	531	-0.1	531	-0.08	530	-0.92	535	-0.25	534	-0.71	530	1.19	439	0.33	438	0.82	567	-0.38	535	0.6	530	-0.36	528	0.0271429	0.167448	519.143	9.6036
20.6457	0.41	525	-0.17	515	-0.79	531	0.28	531	-0.57	530	-0.61	535	-0.86	534	-0.94	530	0.96	439	0.44	438	1.17	567	-0.82	535	0.31	530	-0.9	528	-0.149286	0.1957	519.143	9.6036
20.6565	0.04	525	-0.1	515	-0.39	531	-0.32	531	0.21	530	0.28	535	-0.76	534	-0.51	530	1.15	439	0.22	438	1.12	567	-0.81	535	0.62	530	-0.66	528	0.00642857	0.171084	519.143	9.6036
20.6674	-0.47	525	-0.13	515	-0.02	531	-0.17	531	-0.6	530	-0.16	535	-0.26	534	-0.78	530	1.19	439	0.15	438	1.25	566	-0.45	535	0.49	530	-1.19	528	-0.0821429	0.182986	519.071	9.57645
20.6783	-0.18	525	-0.12	515	-0.21	531	0.23	531	-0.22	530	-0.65	535	-0.18	534	-0.28	530	1.29	438	-0.28	438	0.82	565	-0.66	535	0.56	530	-0.57	528	-0.0321429	0.151912	518.929	9.59594
20.6891	-0.13	525	0.21	515	-0.25	531	-0.41	531	-0.46	530	-0.65	535	-0.76	534	-0.43	530	1.31	437	-0.18	438	0.57	565	-0.93	535	0.91	530	-0.93	528	-0.152143	0.181499	518.857	9.64243
20.7	-0.58	525	0.12	515	-0.46	531	-0.3	531	-0.81	530	-0.39	535	-1.24	534	-1.01	530	1.29	436	-0.35	438	0.86	565	-1.1	535	0.63	530	-0.43	528	-0.269286	0.200564	518.786	9.68923
20.7109	0.13	525	-0.3	515	-0.84	531	0.9	531	-0.07	530	0.28	535	0.06	534	-0.97	530	1.06	435	-0.36	438	0.97	565	-1.13	535	0.76	530	-1.07	528	-0.0414286	0.207282	518.714	9.73632
20.7217	-0.6	525	-0.43	515	0.08	531	-0.36	531	-1.05	530	-0.13	535	-0.81	534	-0.86	530	1.34	434	-0.49	438	1.38	565	-0.89	536	0.93	530	-1.24	528	-0.223571	0.230037	518.714	9.79315
20.7326	0.35	525	-0.12	515	-0.67	531	0.66	531	-0.52	530	0.07	535	-0.52	534	-0.07	530	1.67	433	-0.94	438	1.05	565	-0.77	536	0.63	530	-0.43	529	0.0278571	0.203146	518.714	9.84631
20.7434	-0.34	525	0.55	515	0.11	531	0.35	531	-0.99	530	0.26	535	-0.71	534	-0.65	530	1.31	432	-0.41	438	0.56	564	-0.99	536	0.86	530	0.89	529	0.0571429	0.198772	518.571	9.86876
20.7543	-0.12	525	0.08	515	-0.83	531	0.55	531	-0.45	530	-0.11	535	-1.15	534	-0.61	530	1.02	431	-0.86	438	1.08	564	-0.55	536	0.44	530	-0.1	529	-0.115	0.184402	518.5	9.9171
20.7652	0.21	525	0.08	515	-0.4	531	-0.16	531	-0.21	530	-0.51	535	-0.35	534	-0.89	530	0.72	430	-0.79	438	1.16	564	-0.71	536	0.78	530	-0.42	529	-0.106429	0.166959	518.429	9.96572
20.776	0.21	525	-0.07	515	-0.37	531	-0.93	531	-0.38	530	-0.36	535	-0.48	534	-0.88	530	0.63	430	-1.58	438	1.19	563	-0.78	536	0.64	530	-0.36	529	-0.251429	0.194732	518.357	9.94082
20.7869	0.45	525	0.21	515	-0.32	531	0.6	531	-0.6	530	0.03	535	-0.93	534	-0.51	530	0.33	430	-1.33	438	1.15	562	-0.86	536	0.22	530	-0.56	529	-0.151429	0.184209	518.286	9.91637
20.7977	0.01	525	0.35	515	0.01	531	0.05	531	-1.22	530	-1.07	535	-1.82	534	-0.4	530	0.74	430	-0.89	439	1.2	561	-1.12	536	0.46	530	-0.63	529	-0.309286	0.22888	518.286	9.84798
20.8086	-0.1	525	-0.39	515	-0.55	531	-0.06	531	-1.06	530	-1.3	535	-1.43	534	-0.61	530	0.35	430	-1.24	439	0.55	560	-0.71	536	0.48	530	0.14	529	-0.423571	0.180106	518.214	9.82438
20.8195	-0.26	525	-0.09	515	-0.91	531	0.55	531	-0.78	531	-0.6	536	-1.29	535	-1.42	530	0.68	430	-1.55	439	0.79	560	-0.86	536	0.77	530	-0.82	529	-0.413571	0.221812	518.429	9.84981
20.8303	-0.05	525	0.16	515	-1.17	531	-1.06	531	-1.12	531	-0.56	536	-0.49	536	-0.44	530	0.62	430	-1.65	440	1.32	560	-0.85	536	0.49	530	-0.12	529	-0.351429	0.217624	518.571	9.81517
20.8412	0.19	525	-0.27	515	-0.53	531	-0.51	531	-1.14	531	0.3	536	-0.19	536	-0.86	530	0.86	430	-1.47	441	1.37	560	-0.87	536	0.28	530	-0.48	529	-0.237143	0.207961	518.643	9.77135
20.852	0.75	525	-0.27	515	-1.6	531	0.26	531	-0.69	532	0.03	536	0.04	536	-0.33	530	0.66	430	-1.03	442	0.51	559	-0.9	536	0.56	530	-0.56	529	-0.183571	0.190034	518.714	9.71202
20.8629	-0.3	525	-0.45	515	-0.79	531	0.29	531	-0.95	532	-0.15	536	-0.38	536	-0.21	530	0.75	430	-1.31	443	1.33	559	-0.56	536	0.3	530	-0.52	529	-0.210714	0.184779	518.786	9.66879
20.8738	0.3	525	-0.69	515	-0.86	531	0.89	531	-1.34	532	-0.06	536	-0.08	536	-0.67	530	0.33	430	-1.56	444	1.24	559	-0.7	536	0.05	530	-0.43	529	-0.255714	0.212188	518.857	9.62589
20.8846	-0.24	525	0.41	515	-0.41	531	-0.14	531	-0.17	532	-0.52	536	-0.88	536	-0.82	530	0.65	430	-1.03	445	1.08	558	-0.9	536	0.18	530	0.03	529	-0.197143	0.167537	518.857	9.5606
20.8955	0.6	525	-0.19	515	-1.1	531	-0.66	531	-0.66	532	0.32	536	0.1	536	-0.65	530	0.45	430	-1.09	446	0.97	557	-0.97	536	0.43	530	-0.3	529	-0.196429	0.18186	518.857	9.49601
20.9063	0.78	525	-0.06	515	-0.75	531	0.1	531	-0.83	532	-0.57	536	-0.26	536	-0.39	530	0.85	430	-0.55	447	1.17	557	-1	536	0.39	530	-0.08	529	-0.0857143	0.179553	518.929	9.45403
20.9172	0.14	525	-0.14	515	-0.77	531	0.01	531	-0.67	532	-0.15	536	-0.2	536	-0.35	530	0.93	430	-0.26	447	1.45	557	-0.7	536	0.57	530	-0.09	529	-0.0164286	0.167731	518.929	9.45403
20.9281	0.16	525	0.01	515	-0.1	531	-0.46	531	-0.96	532	-0.31	536	-0.43	536	-1.1	530	1.01	430	-0.15	447	1.45	556	-1.07	536	0.21	530	-0.32	529	-0.147143	0.193199	518.857	9.43215
20.9389	0.27	525	0.4	515	-0.94	531	-0.33	531	-0.54	532	-0.37	536	-0.7	536	-0.57	530	0.6	430	0.01	447	0.99	555	-1.14	536	0.27	530	-0.41	529	-0.175714	0.164373	518.786	9.41076
20.9498	0.37	525	-0.25	515	-0.46	531	0.68	531	-0.83	532	-0.42	536	-0.28	536	-0.97	530	0.83	430	-0.04	447	1.45	555	-1	537	0.88	530	-0.71	529	-0.0535714	0.206878	518.857	9.42108
20.9606	0.59	525	-0.06	515	-0.43	531	0.73	531	-0.67	532	-0.88	536	-0.73	536	-0.22	530	1.03	430	0.3	447	1.2	555	-1.27	538	0.37	530	-1.48	529	-0.108571	0.225322	518.929	9.43192
20.9715	0.61	525	-0.6	515	-0.56	531	-0.56	531	-0.5	532	-0.22	536	-0.16	536	-0.04	530	0.76	430	0.51	447	1.31	554	-1.13	539	0.53	530	-0.74	529	-0.0564286	0.186045	518.929	9.4226
20.9824	-0.18	525	-0.16	515	-0.99	531	-0.29	531	-0.69	532	-0.87	536	-0.78	536	-0.86	530	0.84	430	0.16	447	2.04	553	-1.06	540	0.39	530	0.03	529	-0.172857	0.227918	518.929	9.41443
20.9932	0.03	525	-0.05	515	-0.62	531	0.01	531	-0.4	532	-0.73	536	-0.64	536	-0.82	530	0.42	430	0.48	447	1.32	551	-1.49	541	0.38	530	-0.8	529	-0.207857	0.192034	518.857	9.38836
21.0041	-0.37	525	0.34	515	-0.53	531	-0.27	531	-0.61	532	-0.55	536	-0.14	536	-0.69	530	0.44	430	0.61	447	1.34	550	-0.83	542	0.24	530	0.15	529	-0.0621429	0.163291	518.857	9.38309
21.0149	-0.2	525	-0.29	515	-0.82	531	-0.53	531	-1.46	532	-0.48	536	-0.89	536	-0.17	530	0.01	430	0.19	447	1.48	549	-0.75	542	0.26	530	0.15	529	-0.25	0.185529	518.786	9.36511
21.0258	0.26	525	-0.02	515	-0.98	531	0.03	531	-0.89	532	-1.21	536	0.42	536	-0.62	530	0.52	430	0.43	447	1.72	548	-1.21	542	0.73	530	0.36	529	-0.0328571	0.226918	518.714	9.34764
21.0367	-0.22	525	-0.92	515	-0.66	531	0.4	531	-0.7	532	-0.74	536	-0.89	536	-1.21	530	0.13	430	0.46	447	1.76	547	-1.14	542	0.63	530	-0.15	529	-0.232143	0.223297	518.643	9.33068
21.0475	-0.05	525	-0.24	515	-0.04	531	-0.27	531	-0.83	532	0.08	536	0.41	536	-0.56	530	0.12	430	0.93	447	1.22	546	-0.88	543	0.79	530	0.19	529	0.0621429	0.166737	518.643	9.32833
21.0584	0.46	525	0.22	515	-0.08	531	-0.68	531	-1.76	532	-0.82	536	-0.23	536	-0.89	530	0.41	430	0.24	447	1.35	545	-1.08	543	0.54	530	-0.04	529	-0.168571	0.215521	518.571	9.31247
21.0692	0.87	525	0.09	515	-1.36	531	-0.83	531	-0.5	532	-0.53	536	-0.73	536	-0.94	530	-0.31	430	0.54	447	1.21	544	-0.95	543	0.48	530	-1.26	529	-0.301429	0.216759	518.5	9.29714
21.0801	0.28	525	-0.24	515	-1.37	531	0.26	531	-0.98	532	-0.33	536	-1.07	536	-0.29	530	-0.46	430	0.54	447	1.36	543	-0.94	543	0.37	530	-0.62	529	-0.249286	0.199814	518.429	9.28233
21.091	-0.09	525	-0.45	515	-0.44	532	0.21	531	-0.61	532	-0.22	536	-0.33	536	-1.08	530	-0.28	430	-0.04	447	1.21	542	-1.1	543	0.22	530	-0.01	529	-0.215	0.153701	518.429	9.27582
21.1018	0	525	-0.22	515	-0.5	532	0.06	531	-1.29	532	-0.42	536	-0.17	536	-0.43	530	-0.6	430	0.72	447	1.56	541	-0.86	543	0.59	530	-0.35	529	-0.136429	0.190689	518.357	9.26212
21.1127	0.25	525	-0.09	515	0.26	532	0.41	531	-1.54	532	-0.22	536	0.25	536	-0.85	530	-0.78	430	1.05	447	1.46	540	-1.29	543	0.49	530	0.2	529	-0.0285714	0.225887	518.286	9.24896
21.1235	0.47	525	-0.2	515	-0.06	532	0.19	531	-1.29	533	-0.58	536	-0.99	536	-0.96	530	-0.81	430	0.48	447	1.7	539	-1.03	543	0.12	530	-0.29	529	-0.232143	0.214633	518.286	9.2448
21.1344	-0.03	525	-0.35	515	-0.11	532	0.11	531	-0.98	534	-0.34	536	-0.02	536	-0.97	530	-1.01	430	0.63	447	1.51	538	-0.91	544	0.51	530	-1.08	529	-0.217143	0.20241	518.357	9.25678
21.1453	0.6	525	-0.39	515	-0.59	532	0.2	531	-0.39	534	-0.21	536	-0.85	536	-0.81	530	-1.01	430	0.32	447	1.09	537	-1.05	544	0.09	530	-0.24	529	-0.231429	0.169095	518.286	9.24539
21.1561	0.18	525	-0.54	515	-1.07	532	-0.43	531	-1.08	534	-0.73	536	-0.81	536	-0.51	530	-1.25	431	0.34	447	1.39	536	-1.26	544	0.6	530	0.2	529	-0.355	0.210999	518.286	9.18218
21.167	-0.11	525	-0.49	515	-0.53	532	0.21	531	-0.98	534	0.07	536	0.49	536	-0.84	530	-1.27	432	0.38	447	1.43	535	-0.95	545	0.12	530	-0.27	529	-0.195714	0.192496	518.357	9.13549
21.1779	0.98	525	-0.1	515	-1.2	532	0.15	531	0.17	534	-0.51	536	0.07	536	-0.76	530	-1.26	433	0	447	1.25	534	-0.89	545	0.79	530	0.13	529	-0.0842857	0.206862	518.357	9.07394
21.1887	0.46	525	-0.71	515	-1.3	532	0.15	531	-1.15	534	-0.55	536	-0.87	536	-1.05	530	-1.16	434	0.27	447	1.27	533	-1.11	545	0.29	530	0.27	529	-0.370714	0.214951	518.357	9.01318
21.1996	0.17	525	-0.69	515	-0.15	533	-0.15	531	-1.18	534	-0.02	536	-0.44	536	-0.89	530	-1.09	435	0.59	447	1.48	532	-1.01	545	0.42	530	0.04	529	-0.208571	0.199507	518.429	8.96189
21.2104	0.89	525	-0.44	515	-0.83	533	-0.05	531	-0.7	535	-0.38	536	-0.2	536	-0.35	530	-1.4	436	0.27	447	1.38	531	-0.49	546	0.15	530	0.3	529	-0.132143	0.189265	518.571	8.92934
21.2213	1.44	525	-0.32	515	-0.93	533	-0.54	531	-1.32	535	-0.35	536	-0.06	536	-0.89	530	-1.04	437	0.45	447	1.41	530	-0.99	546	0.25	530	0.4	529	-0.177857	0.234697	518.571	8.87131
21.2322	0.42	525	-1.15	515	-1.37	533	0.36	531	-0.69	535	0.13	536	0.47	536	-0.25	530	-0.83	438	0.36	447	0.88	529	-1	546	0.39	530	-0.31	529	-0.185	0.191061	518.571	8.81415
21.243	0.21	525	-0.45	515	0.19	533	0.06	531	-1.36	535	-0.6	536	-1.08	536	-0.92	530	-0.51	438	0.59	447	1.18	529	-1.02	546	0.71	530	0.39	529	-0.186429	0.205946	518.571	8.81415
21.2539	1.02	525	0.29	515	-0.47	533	-0.6	531	-0.33	535	-0.12	536	-0.07	536	-0.99	530	-0.71	438	0.91	447	1.17	529	-0.95	546	0.41	530	0.17	529	-0.0192857	0.190562	518.571	8.81415
21.2647	0.1	525	-0.36	515	-0.49	533	-0.41	531	-1.1	535	-0.55	536	0.47	536	-0.73	530	-0.73	438	0.15	447	1.21	528	-0.99	546	0.48	530	0.26	529	-0.192143	0.175331	518.5	8.80793
21.2756	1.04	525	-0.38	515	0.25	533	-0.2	531	-0.76	535	0.18	536	0.24	536	-0.71	530	0.06	438	0.93	447	1.39	527	-0.98	546	0.46	530	1.16	529	0.191429	0.200348	518.429	8.80229
21.2865	0.63	525	-0.63	515	-0.54	533	-0.37	531	-0.71	535	-0.65	536	-0.63	536	-0.74	530	-0.41	438	0.32	447	1.38	526	-0.81	546	0.58	530	0.92	529	-0.118571	0.194857	518.357	8.79723
21.2973	0.5	525	-0.65	515	-1.19	533	-0.46	531	0.03	535	-0.35	536	0.25	536	-0.57	530	-0.28	438	0.59	447	1.23	525	-1.01	546	0.36	530	0.43	529	-0.08	0.181499	518.286	8.79275
21.3082	-0.05	525	0.14	515	-0.68	533	0.13	531	-0.84	535	-1.14	536	0.03	536	-1.11	530	-0.09	438	0.47	447	1.15	524	-0.9	546	0.77	530	0.22	529	-0.135714	0.188757	518.214	8.78884
21.319	0.64	525	-0.62	515	-0.64	533	-0.4	531	-0.23	535	0.19	536	-0.14	536	-0.85	530	-0.47	438	-0.04	447	1.16	523	-1.02	546	0.93	530	0.06	529	-0.102143	0.174243	518.143	8.78551
21.3299	-0.2	525	-0.39	515	0.04	533	-0.41	531	-0.45	535	-0.26	536	0.04	536	-1.2	530	0.28	438	0.77	447	1.63	522	-0.79	546	0.38	530	0.9	529	0.0242857	0.195723	518.071	8.78277
21.3408	0.06	525	-0.9	515	-0.31	533	-0.73	531	-1.39	535	0.23	536	-0.62	536	-0.91	530	-0.18	438	0.5	447	1.26	521	-0.84	546	0.55	530	1.55	529	-0.123571	0.230943	518	8.7806
21.3516	0.64	525	-0.95	515	-0.45	533	0.02	531	-0.72	535	-0.51	536	-0.09	536	-1.04	530	-0.1	438	0.64	447	0.67	520	-1.31	546	0.33	530	1.36	529	-0.107857	0.206534	517.929	8.77901
21.3625	0.45	525	-0.86	515	-0.38	533	-0.47	531	-0.77	535	-0.36	536	0.19	536	-1.58	530	0.12	438	0.69	447	0.68	520	-1.28	546	0.51	530	-0.01	528	-0.219286	0.192449	517.857	8.77237
21.3733	0.84	525	-0.66	515	-0.47	533	-0.75	531	-0.23	535	-0.33	536	-0.08	536	-1.32	531	0.04	438	0.69	447	1.27	520	-1.1	547	0.36	530	-0.18	528	-0.137143	0.196599	518	8.7981
21.3842	-0.07	525	-0.87	515	-0.65	533	-0.48	531	-0.31	535	-0.49	536	0.08	536	-1.15	532	0.05	438	0.74	447	0.77	520	-1.6	548	0.23	530	0.38	528	-0.240714	0.184106	518.143	8.82483
21.3951	0.79	525	-0.17	515	-0.53	533	-0.85	531	-0.98	535	0.1	536	-0.14	536	-1.3	533	0.25	438	0.37	447	0.89	520	-1.05	549	0.33	530	0.11	528	-0.155714	0.184747	518.286	8.85253
21.4059	0.45	525	-0.88	515	-0.56	533	0.11	531	-0.2	535	-0.41	536	-0.41	536	-1.25	534	0.18	438	0.21	447	0.66	520	-1.19	550	0.59	530	-0.37	528	-0.219286	0.165438	518.429	8.88122
21.4168	0.77	525	-0.39	515	-0.92	533	-1.15	531	-0.62	535	-0.58	536	0.39	536	-1.36	535	0.16	438	0.7	447	1.1	520	-0.96	551	0.51	530	-0.3	528	-0.189286	0.211381	518.571	8.91086
21.4276	0.53	525	-0.14	515	0.19	533	0.66	531	-0.71	535	-0.01	536	-0.45	536	-1.22	536	-0.22	438	0.21	447	0.98	520	-1.12	551	0.28	530	-0.17	528	-0.085	0.170338	518.643	8.92127
21.4385	-0.44	525	-0.18	515	-0.62	533	-0.51	531	-0.73	535	-0.33	536	0.18	536	-1.09	537	-0.33	438	0.85	447	0.93	520	-1.11	551	0.04	530	0.02	528	-0.237143	0.163678	518.714	8.93224
21.4494	0.48	525	-0.66	515	-0.46	533	-0.5	531	-1.14	535	-0.26	536	-0.73	536	-1.44	538	-0.08	438	0.73	447	1.11	520	-0.93	552	0.21	530	-0.18	528	-0.275	0.192659	518.857	8.96382
21.4602	0.79	525	0	515	0.19	533	-0.15	531	-0.71	535	0.02	536	0.22	536	-0.88	539	-0.26	438	0.43	447	1.32	520	-1.18	552	0.27	530	-0.17	528	-0.00785714	0.17381	518.929	8.97583
21.4711	0.72	525	-0.37	515	0.51	533	-0.51	531	-1.07	535	-0.09	536	-0.1	536	-0.75	539	-0.35	438	0.71	447	0.89	519	-1	552	0.27	530	-0.46	528	-0.114286	0.172591	518.857	8.97546
21.4819	0.33	525	-0.28	515	0.14	533	-0.21	531	-0.22	535	0.02	536	-0.06	536	-0.55	539	-0.27	438	0.63	447	1.19	519	-0.71	552	0.45	530	0.13	528	0.0421429	0.1324	518.857	8.97546
21.4928	0.61	525	0.31	515	0.13	533	-0.46	531	-0.77	535	-0.89	536	-0.14	536	-1.29	539	-0.02	438	0.7	447	1.27	519	-1.01	552	0.41	530	0.12	528	-0.0735714	0.196053	518.857	8.97546
21.5037	-0.36	525	-0.56	515	-0.52	533	-1.31	531	-0.79	535	0.75	536	-0.21	536	-0.76	539	-0.46	438	0.82	447	1.44	518	-1.14	552	0.32	530	0.5	528	-0.162857	0.215808	518.786	8.97566
21.5145	0.47	525	0.09	515	0.42	533	0.12	531	-0.77	535	-0.3	536	-0.35	536	-0.86	539	-0.24	438	0.78	447	1.39	517	-0.92	553	0.51	530	-0.3	528	0.00285714	0.177889	518.786	8.99706
21.5254	0.7	525	-0.81	515	-0.23	533	-0.18	531	-0.52	535	-0.7	536	-0.57	536	-0.87	539	-0.07	438	0.94	447	1.16	516	-0.73	553	0.45	530	-0.44	528	-0.133571	0.18137	518.714	8.99843
21.5362	-0.03	525	-0.34	515	-0.6	533	-0.18	531	-1.06	535	-0.01	536	-0.23	536	-0.46	539	-0.24	438	0.68	447	0.87	515	-1.06	553	0.38	530	0.82	528	-0.104286	0.16512	518.643	9.00037
21.5471	0.9	525	-0.42	515	-0.18	533	-0.07	531	-0.7	535	-0.62	536	-0.36	536	-0.73	539	-0.54	438	1	447	1.18	515	-1.32	553	0.34	530	0.2	528	-0.0942857	0.19637	518.643	9.00037
21.558	0.21	525	0.51	515	-0.11	533	-0.29	531	-0.85	535	-0.56	536	-0.27	536	-0.72	539	-0.74	438	0.85	447	1.44	515	-0.81	554	0.58	530	-0.66	528	-0.101429	0.19123	518.714	9.0216
21.5688	0.43	525	-0.43	515	-0.46	533	-0.23	531	-0.38	535	-0.42	536	-0.04	536	-0.65	539	-0.54	438	0.61	447	1.25	514	-1.16	554	0.53	530	0.77	528	-0.0514286	0.178328	518.643	9.02415
21.5797	0.33	525	-0.8	515	-0.64	533	-1.39	531	-0.56	535	-0.79	536	-0.55	536	-0.89	539	0.09	438	0.82	447	1.62	513	-1.05	554	0.49	530	-0.61	528	-0.280714	0.22286	518.571	9.02726
21.5905	0.17	525	0.08	515	0.11	533	-0.66	531	-0.13	535	-0.29	536	-0.37	536	-0.48	539	-0.62	438	0.48	447	1.31	512	-0.69	555	0.6	530	0.26	528	-0.0164286	0.151587	518.571	9.05278
21.6014	0.59	525	-0.4	515	-0.57	533	-1.24	531	-0.39	535	0.26	536	0.22	536	-0.63	539	-0.61	438	1.11	447	1.38	511	-0.76	555	0.24	530	0.31	528	-0.035	0.199702	518.5	9.05705
21.6123	0.79	525	-0.44	515	0.59	533	-0.38	531	-1.2	535	0.07	536	-0.03	536	-0.5	539	-0.59	438	0.98	447	1.22	510	-0.89	555	0.52	530	0.94	528	0.0771429	0.20523	518.429	9.06188
21.6231	0.26	525	0.38	515	-0.09	533	-0.62	531	-0.37	535	-0.92	536	-0.28	536	-0.78	539	-0.17	438	0.31	447	1.31	509	-1.05	555	0.22	530	-0.03	528	-0.130714	0.166217	518.357	9.06727
21.634	0.33	525	-0.31	515	-0.54	533	-0.37	531	-1.24	535	-0.01	536	-0.68	536	-0.87	539	-0.74	438	0.71	447	1.15	508	-1.09	555	0.18	530	0.4	528	-0.22	0.188511	518.286	9.07322
21.6448	0.09	525	-0.21	515	0.22	533	-0.98	531	-0.04	535	0.04	536	-1.15	536	-0.94	539	-0.44	438	0.92	447	1.09	507	-1.28	556	0.53	530	-0.13	528	-0.162857	0.197001	518.286	9.10224
21.6557	0.38	525	-0.14	515	0.03	533	-0.34	531	-0.57	535	0.02	536	-0.53	536	-0.16	539	-0.57	438	0.88	447	0.78	506	-1	557	0.42	530	1.21	528	0.0292857	0.169817	518.286	9.13238
21.6666	-0.04	525	-0.63	515	-0.04	533	0.28	531	-0.46	535	-0.36	536	-0.57	536	-0.32	539	-0.91	438	0.67	447	0.95	506	-0.99	558	0.34	530	0.2	528	-0.134286	0.153883	518.357	9.15592
21.6774	1.31	525	-0.78	515	-0.05	533	-0.49	531	-1	535	-0.09	536	-0.25	536	-0.51	539	-0.78	438	0.65	447	0.71	506	-1.23	558	0.54	530	0.24	528	-0.123571	0.197249	518.357	9.15592
21.6883	0.16	525	-0.8	515	-0.55	533	-0.31	531	-0.95	535	0.03	536	0.31	536	-0.81	539	-0.42	438	0.57	447	0.86	506	-0.5	558	0.53	530	0.52	528	-0.0971429	0.159496	518.357	9.15592
21.6992	0.35	525	0.21	515	-0.94	533	0.38	531	-0.02	535	-0.93	536	-0.22	536	-1.12	539	-0.68	438	0.91	447	1.41	506	-1.11	558	0.68	530	0.3	528	-0.0557143	0.214609	518.357	9.15592
21.71	0.26	525	-0.37	515	-0.32	533	0.31	531	-0.67	535	0.62	536	-0.82	536	-1.11	539	-0.47	438	0.68	447	1.04	506	-1.19	558	0.49	530	0.08	528	-0.105	0.187727	518.357	9.15592
[truncated: 1,211 more rows]

## Sheet: Figure 4E
Time	dF/F0_bleach_correct	Wavelength	dF/F0_bleach_correct	Wavelength	dF/F0_bleach_correct	Wavelength	dF/F0_bleach_correct	Wavelength	dF/F0_bleach_correct	Wavelength	dF/F0_bleach_correct	Wavelength	dF/F0_bleach_correct	Wavelength	Mean DF/F0	SEM	Mean wavelength	SEM
0.0109	0	545	0	535	0	540	0	540	0	535	0	535	0	540	0	0	538.571	1.42857
0.0217	0	545	0	535	0	540	0	540	0	535	0	535	0	540	0	0	538.571	1.42857
0.0326	0	545	0	535	0	540	0	540	0	535	0	535	0	540	0	0	538.571	1.42857
0.0434	0	545	0	535	0	540	0	540	0	535	0	535	0	540	0	0	538.571	1.42857
0.0543	0	545	0	535	0	540	0	540	0	535	0	535	0	540	0	0	538.571	1.42857
0.0652	0	545	0	535	0	540	0	540	0	535	0	535	0	540	0	0	538.571	1.42857
0.076	0	545	0	535	0	540	0	540	0	535	0	535	0	540	0	0	538.571	1.42857
0.0869	0	545	0	535	0	540	0	540	0	535	0	535	0	540	0	0	538.571	1.42857
0.0977	0	545	0	535	0	540	0	540	0	535	0	535	0	540	0	0	538.571	1.42857
0.1086	0	545	0	535	0	540	0	540	0	535	0	535	0	540	0	0	538.571	1.42857
0.1195	0	545	0	535	0	540	0	540	0	535	0	535	0	540	0	0	538.571	1.42857
0.1303	0	545	0	535	0	540	0	540	0	535	0	535	0	540	0	0	538.571	1.42857
0.1412	0	545	0	535	0	540	0	540	0	535	0	535	0	540	0	0	538.571	1.42857
0.152	0	545	0	535	0	540	0	540	0	535	0	535	0	540	0	0	538.571	1.42857
0.1629	0	545	0	535	0	540	0	540	0	535	0	535	0	540	0	0	538.571	1.42857
0.1738	0	545	0	535	0	540	0	540	0	535	0	535	0	540	0	0	538.571	1.42857
0.1846	0	545	0	535	0	540	0	540	0	535	0	535	0	540	0	0	538.571	1.42857
0.1955	0	545	0	535	0	540	0	540	0	535	0	535	0	540	0	0	538.571	1.42857
0.2063	0	545	0	535	0	540	0	540	0	535	0	535	0	540	0	0	538.571	1.42857
0.2172	0	545	0	535	0	540	0	540	0	535	0	535	0	540	0	0	538.571	1.42857
0.2281	0	545	0	535	0	540	0	540	0	535	0	535	0	540	0	0	538.571	1.42857
0.2389	0	545	0	535	0	540	0	540	0	535	0	535	0	540	0	0	538.571	1.42857
0.2498	0	545	0	535	0	540	0	540	0	535	0	535	0	540	0	0	538.571	1.42857
0.2607	0	545	0	535	0	540	0	540	0	535	0	535	0	540	0	0	538.571	1.42857
0.2715	0	545	0	535	0	540	0	540	0	535	0	535	0	540	0	0	538.571	1.42857
0.2824	0	545	0	535	0	540	0	540	0	535	0	535	0	540	0	0	538.571	1.42857
0.2932	0	545	0	535	0	540	0	540	0	535	0	535	0	540	0	0	538.571	1.42857
0.3041	0	545	0	535	0	540	0	540	0	535	0	535	0	540	0	0	538.571	1.42857
0.315	0	545	0	535	0	540	0	540	0	535	0	535	0	540	0	0	538.571	1.42857
0.3258	0	545	0	535	0	540	0	540	0	535	0	535	0	540	0	0	538.571	1.42857
0.3367	0	545	0	535	0	540	0	540	0	535	0	535	0	540	0	0	538.571	1.42857
0.3475	0	545	0	535	0	540	0	540	0	535	0	535	0	540	0	0	538.571	1.42857
0.3584	0	545	0	535	0	540	0	540	0	535	0	535	0	540	0	0	538.571	1.42857
0.3693	0	545	0	535	0	540	0	540	0	535	0	535	0	540	0	0	538.571	1.42857
0.3801	0	545	0	535	0	540	0	540	0	535	0	535	0	540	0	0	538.571	1.42857
0.391	0	545	0	535	0	540	0	540	0	535	0	535	0	540	0	0	538.571	1.42857
0.4018	0	545	0	535	0	540	0	540	0	535	0	535	0	540	0	0	538.571	1.42857
0.4127	0	545	0	535	0	540	0	540	0	535	0	535	0	540	0	0	538.571	1.42857
0.4236	0	545	0	535	0	540	0	540	0	535	0	535	0	540	0	0	538.571	1.42857
0.4344	0	545	0	535	0	540	0	540	0	535	0	535	0	540	0	0	538.571	1.42857
0.4453	0	545	0	535	0	540	0	540	0	535	0	535	0	540	0	0	538.571	1.42857
0.4561	0	545	0	535	0	540	0	540	0	535	0	535	0	540	0	0	538.571	1.42857
0.467	0	545	0	535	0	540	0	540	0	535	0	535	0	540	0	0	538.571	1.42857
0.4779	0	545	0	535	0	540	0	540	0	535	0	535	0	540	0	0	538.571	1.42857
0.4887	0	545	0	535	0	540	0	540	0	535	0	535	0	540	0	0	538.571	1.42857
0.4996	0	545	0	535	0	540	0	540	0	535	0	535	0	540	0	0	538.571	1.42857
0.5104	0	545	0	535	0	540	0	540	0	535	0	535	0	540	0	0	538.571	1.42857
0.5213	0	545	0	535	0	540	0	540	0	535	0	535	0	540	0	0	538.571	1.42857
0.5322	0	545	0	535	0	540	0	540	0	535	0	535	0	540	0	0	538.571	1.42857
0.543	0	545	0	535	0	540	0	540	0	535	0	535	0	540	0	0	538.571	1.42857
0.5539	0	545	0	535	0	540	0	540	0	535	0	535	0	540	0	0	538.571	1.42857
0.5647	0	545	0	535	0	540	0	540	0	535	0	535	0	540	0	0	538.571	1.42857
0.5756	0	545	0	535	0	540	0	540	0	535	0	535	0	540	0	0	538.571	1.42857
0.5865	0	545	0	535	0	540	0	540	0	535	0	535	0	540	0	0	538.571	1.42857
0.5973	0	545	0	535	0	540	0	540	0	535	0	535	0	540	0	0	538.571	1.42857
0.6082	0	545	0	535	0	540	0	540	0	535	0	535	0	540	0	0	538.571	1.42857
0.619	0	545	0	535	0	540	0	540	0	535	0	535	0	540	0	0	538.571	1.42857
0.6299	0	545	0	535	0	540	0	540	0	535	0	535	0	540	0	0	538.571	1.42857
0.6408	0	545	0	535	0	540	0	540	0	535	0	535	0	540	0	0	538.571	1.42857
0.6516	0	545	0	535	0	540	0	540	0	535	0	535	0	540	0	0	538.571	1.42857
0.6625	0	545	0	535	0	540	0	540	0	535	0	535	0	540	0	0	538.571	1.42857
0.6733	0	545	0	535	0	540	0	540	0	535	0	535	0	540	0	0	538.571	1.42857
0.6842	0	545	0	535	0	540	0	540	0	535	0	535	0	540	0	0	538.571	1.42857
0.6951	0	545	0	535	0	540	0	540	0	535	0	535	0	540	0	0	538.571	1.42857
0.7059	0	545	0	535	0	540	0	540	0	535	0	535	0	540	0	0	538.571	1.42857
0.7168	0	545	0	535	0	540	0	540	0	535	0	535	0	540	0	0	538.571	1.42857
0.7276	0	545	0	535	0	540	0	540	0	535	0	535	0	540	0	0	538.571	1.42857
0.7385	0	545	0	535	0	540	0	540	0	535	0	535	0	540	0	0	538.571	1.42857
0.7494	0	545	0	535	0	540	0	540	0	535	0	535	0	540	0	0	538.571	1.42857
0.7602	0	545	0	535	0	540	0	540	0	535	0	535	0	540	0	0	538.571	1.42857
0.7711	0	545	0	535	0	540	0	540	0	535	0	535	0	540	0	0	538.571	1.42857
0.782	0	545	0	535	0	540	0	540	0	535	0	535	0	540	0	0	538.571	1.42857
0.7928	0	545	0	535	0	540	0	540	0	535	0	535	0	540	0	0	538.571	1.42857
0.8037	0	545	0	535	0	540	0	540	0	535	0	535	0	540	0	0	538.571	1.42857
0.8145	0	545	0	535	0	540	0	540	0	535	0	535	0	540	0	0	538.571	1.42857
0.8254	0	545	0	535	0	540	0	540	0	535	0	535	0	540	0	0	538.571	1.42857
0.8363	0	545	0	535	0	540	0	540	0	535	0	535	0	540	0	0	538.571	1.42857
0.8471	0	545	0	535	0	540	0	540	0	535	0	535	0	540	0	0	538.571	1.42857
0.858	0	545	0	535	0	540	0	540	0	535	0	535	0	540	0	0	538.571	1.42857
0.8688	0	545	0	535	0	540	0	540	0	535	0	535	0	540	0	0	538.571	1.42857
0.8797	0	545	0	535	0	540	0	540	0	535	0	535	0	540	0	0	538.571	1.42857
0.8906	0	545	0	535	0	540	0	540	0	535	0	535	0	540	0	0	538.571	1.42857
0.9014	0	545	0	535	0	540	0	540	0	535	0	535	0	540	0	0	538.571	1.42857
0.9123	0	545	0	535	0	540	0	540	0	535	0	535	0	540	0	0	538.571	1.42857
0.9231	0	545	0	535	0	540	0	540	0	535	0	535	0	540	0	0	538.571	1.42857
0.934	0	545	0	535	0	540	0	540	0	535	0	535	0	540	0	0	538.571	1.42857
0.9449	0	545	0	535	0	540	0	540	0	535	0	535	0	540	0	0	538.571	1.42857
0.9557	0	545	0	535	0	540	0	540	0	535	0	535	0	540	0	0	538.571	1.42857
0.9666	0	545	0	535	0	540	0	540	0	535	0	535	0	540	0	0	538.571	1.42857
0.9774	0	545	0	535	0	540	0	540	0	535	0	535	0	540	0	0	538.571	1.42857
0.9883	0	545	0	535	0	540	0	540	0	535	0	535	0	540	0	0	538.571	1.42857
0.9992	0	545	0	535	0	540	0	540	0	535	0	535	0	540	0	0	538.571	1.42857
1.01	0	545	0	535	0	540	0	540	0	535	0	535	0	540	0	0	538.571	1.42857
1.0209	0	545	0	535	0	540	0	540	0	535	0	535	0	540	0	0	538.571	1.42857
1.0317	0	545	0	535	0	540	0	540	0	535	0	535	0	540	0	0	538.571	1.42857
1.0426	0	545	0	535	0	540	0	540	0	535	0	535	0	540	0	0	538.571	1.42857
1.0535	0	545	0	535	0	540	0	540	0	535	0	535	0	540	0	0	538.571	1.42857
1.0643	0	545	0	535	0	540	0	540	0	535	0	535	0	540	0	0	538.571	1.42857
1.0752	0	545	0	535	0	540	0	540	0	535	0	535	0	540	0	0	538.571	1.42857
1.086	0	545	0	535	0	540	0	540	0	535	0	535	0	540	0	0	538.571	1.42857
1.0969	0	545	0	535	0	540	0	540	0	535	0	535	0	540	0	0	538.571	1.42857
1.1078	0	545	0	535	0	540	0	540	0	535	0	535	0	540	0	0	538.571	1.42857
1.1186	0	545	0	535	0	540	0	540	0	535	0	535	0	540	0	0	538.571	1.42857
1.1295	0	545	0	535	0	540	0	540	0	535	0	535	0	540	0	0	538.571	1.42857
1.1403	0	545	0	535	0	540	0	540	0	535	0	535	0	540	0	0	538.571	1.42857
1.1512	0	545	0	535	0	540	0	540	0	535	0	535	0	540	0	0	538.571	1.42857
1.1621	0	545	0	535	0	540	0	540	0	535	0	535	0	540	0	0	538.571	1.42857
1.1729	0	545	0	535	0	540	0	540	0	535	0	535	0	540	0	0	538.571	1.42857
1.1838	0	545	0	535	0	540	0	540	0	535	0	535	0	540	0	0	538.571	1.42857
1.1946	0	545	0	535	0	540	0	540	0	535	0	535	0	540	0	0	538.571	1.42857
1.2055	0	545	0	535	0	540	0	540	0	535	0	535	0	540	0	0	538.571	1.42857
1.2164	0	545	0	535	0	540	0	540	0	535	0	535	0	540	0	0	538.571	1.42857
1.2272	0	545	0	535	0	540	0	540	0	535	0	535	0	540	0	0	538.571	1.42857
1.2381	0	545	0	535	0	540	0	540	0	535	0	535	0	540	0	0	538.571	1.42857
1.249	0	545	0	535	0	540	0	540	0	535	0	535	0	540	0	0	538.571	1.42857
1.2598	0	545	0	535	0	540	0	540	0	535	0	535	0	540	0	0	538.571	1.42857
1.2707	0	545	0	535	0	540	0	540	0	535	0	535	0	540	0	0	538.571	1.42857
1.2815	0	545	0	535	0	540	0	540	0	535	0	535	0	540	0	0	538.571	1.42857
1.2924	0	545	0	535	0	540	0	540	0	535	0	535	0	540	0	0	538.571	1.42857
1.3033	0	545	0	535	0	540	0	540	0	535	0	535	0	540	0	0	538.571	1.42857
1.3141	0	545	0	535	0	540	0	540	0	535	0	535	0	540	0	0	538.571	1.42857
1.325	0	545	0	535	0	540	0	540	0	535	0	535	0	540	0	0	538.571	1.42857
1.3358	0	545	0	535	0	540	0	540	0	535	0	535	0	540	0	0	538.571	1.42857
1.3467	0	545	0	535	0	540	0	540	0	535	0	535	0	540	0	0	538.571	1.42857
1.3576	0	545	0	535	0	540	0	540	0	535	0	535	0	540	0	0	538.571	1.42857
1.3684	0	545	0	535	0	540	0	540	0	535	0	535	0	540	0	0	538.571	1.42857
1.3793	0	545	0	535	0	540	0	540	0	535	0	535	0	540	0	0	538.571	1.42857
1.3901	0	545	0	535	0	540	0	540	0	535	0	535	0	540	0	0	538.571	1.42857
1.401	0	545	0	535	0	540	0	540	0	535	0	535	0	540	0	0	538.571	1.42857
1.4119	0	545	0	535	0	540	0	540	0	535	0	535	0	540	0	0	538.571	1.42857
1.4227	0	545	0	535	0	540	0	540	0	535	0	535	0	540	0	0	538.571	1.42857
1.4336	0	545	0	535	0	540	0	540	0	535	0	535	0	540	0	0	538.571	1.42857
1.4444	0	545	0	535	0	540	0	540	0	535	0	535	0	540	0	0	538.571	1.42857
1.4553	0	545	0	535	0	540	0	540	0	535	0	535	0	540	0	0	538.571	1.42857
1.4662	0	545	0	535	0	540	0	540	0	535	0	535	0	540	0	0	538.571	1.42857
1.477	0	545	0	535	0	540	0	540	0	535	0	535	0	540	0	0	538.571	1.42857
1.4879	0	545	0	535	0	540	0	540	0	535	0	535	0	540	0	0	538.571	1.42857
1.4987	0	545	0	535	0	540	0	540	0	535	0	535	0	540	0	0	538.571	1.42857
1.5096	0	545	0	535	0	540	0	540	0	535	0	535	0	540	0	0	538.571	1.42857
1.5205	0	545	0	535	0	540	0	540	0	535	0	535	0	540	0	0	538.571	1.42857
1.5313	0	545	0	535	0	540	0	540	0	535	0	535	0	540	0	0	538.571	1.42857
1.5422	0	545	0	535	0	540	0	540	0	535	0	535	0	540	0	0	538.571	1.42857
1.553	0	545	0	535	0	540	0	540	0	535	0	535	0	540	0	0	538.571	1.42857
1.5639	0	545	0	535	0	540	0	540	0	535	0	535	0	540	0	0	538.571	1.42857
1.5748	0	545	0	535	0	540	0	540	0	535	0	535	0	540	0	0	538.571	1.42857
1.5856	0	545	0	535	0	540	0	540	0	535	0	535	0	540	0	0	538.571	1.42857
1.5965	0	545	0	535	0	540	0	540	0	535	0	535	0	540	0	0	538.571	1.42857
1.6073	0	545	0	535	0	540	0	540	0	535	0	535	0	540	0	0	538.571	1.42857
1.6182	0	545	0	535	0	540	0	540	0	535	0	535	0	540	0	0	538.571	1.42857
1.6291	0	545	0	535	0	540	0	540	0	535	0	535	0	540	0	0	538.571	1.42857
1.6399	0	545	0	535	0	540	0	540	0	535	0	535	0	540	0	0	538.571	1.42857
1.6508	0	545	0	535	0	540	0	540	0	535	0	535	0	540	0	0	538.571	1.42857
1.6616	0	545	0	535	0	540	0	540	0	535	0	535	0	540	0	0	538.571	1.42857
1.6725	0	545	0	535	0	540	0	540	0	535	0	535	0	540	0	0	538.571	1.42857
1.6834	0	545	0	535	0	540	0	540	0	535	0	535	0	540	0	0	538.571	1.42857
1.6942	0	545	0	535	0	540	0	540	0	535	0	535	0	540	0	0	538.571	1.42857
1.7051	0	545	0	535	0	540	0	540	0	535	0	535	0	540	0	0	538.571	1.42857
1.7159	0	545	0	535	0	540	0	540	0	535	0	535	0	540	0	0	538.571	1.42857
1.7268	0	545	0	535	0	540	0	540	0	535	0	535	0	540	0	0	538.571	1.42857
1.7377	0	545	0	535	0	540	0	540	0	535	0	535	0	540	0	0	538.571	1.42857
1.7485	0	545	0	535	0	540	0	540	0	535	0	535	0	540	0	0	538.571	1.42857
1.7594	0	545	0	535	0	540	0	540	0	535	0	535	0	540	0	0	538.571	1.42857
1.7703	0	545	0	535	0	540	0	540	0	535	0	535	0	540	0	0	538.571	1.42857
1.7811	0	545	0	535	0	540	0	540	0	535	0	535	0	540	0	0	538.571	1.42857
1.792	0	545	0	535	0	540	0	540	0	535	0	535	0	540	0	0	538.571	1.42857
1.8028	0	545	0	535	0	540	0	540	0	535	0	535	0	540	0	0	538.571	1.42857
1.8137	0	545	0	535	0	540	0	540	0	535	0	535	0	540	0	0	538.571	1.42857
1.8246	0	545	0	535	0	540	0	540	0	535	0	535	0	540	0	0	538.571	1.42857
1.8354	0	545	0	535	0	540	0	540	0	535	0	535	0	540	0	0	538.571	1.42857
1.8463	0	545	0	535	0	540	0	540	0	535	0	535	0	540	0	0	538.571	1.42857
1.8571	0	545	0	535	0	540	0	540	0	535	0	535	0	540	0	0	538.571	1.42857
1.868	0	545	0	535	0	540	0	540	0	535	0	535	0	540	0	0	538.571	1.42857
1.8789	0	545	0	535	0	540	0	540	0	535	0	535	0	540	0	0	538.571	1.42857
1.8897	0	545	0	535	0	540	0	540	0	535	0	535	0	540	0	0	538.571	1.42857
1.9006	0	545	0	535	0	540	0	540	0	535	0	535	0	540	0	0	538.571	1.42857
1.9114	0	545	0	535	0	540	0	540	0	535	0	535	0	540	0	0	538.571	1.42857
1.9223	0	545	0	535	0	540	0	540	0	535	0	535	0	540	0	0	538.571	1.42857
1.9332	0	545	0	535	0	540	0	540	0	535	0	535	0	540	0	0	538.571	1.42857
1.944	0	545	0	535	0	540	0	540	0	535	0	535	0	540	0	0	538.571	1.42857
1.9549	0	545	0	535	0	540	0	540	0	535	0	535	0	540	0	0	538.571	1.42857
1.9657	0	545	0	535	0	540	0	540	0	535	0	535	0	540	0	0	538.571	1.42857
1.9766	0	545	0	535	0	540	0	540	0	535	0	535	0	540	0	0	538.571	1.42857
1.9875	0	545	0	535	0	540	0	540	0	535	0	535	0	540	0	0	538.571	1.42857
1.9983	0	545	0	535	0	540	0	540	0	535	0	535	0	540	0	0	538.571	1.42857
2.0092	0	545	0	535	0	540	0	540	0	535	0	535	0	540	0	0	538.571	1.42857
2.02	0	545	0	535	0	540	0	540	0	535	0	535	0	540	0	0	538.571	1.42857
2.0309	0	545	0	535	0	540	0	540	0	535	0	535	0	540	0	0	538.571	1.42857
2.0418	0	545	0	535	0	540	0	540	0	535	0	535	0	540	0	0	538.571	1.42857
2.0526	0	545	0	535	0	540	0	540	0	535	0	535	0	540	0	0	538.571	1.42857
2.0635	0	545	0	535	0	540	0	540	0	535	0	535	0	540	0	0	538.571	1.42857
2.0743	0	545	0	535	0	540	0	540	0	535	0	535	0	540	0	0	538.571	1.42857
2.0852	0	545	0	535	0	540	0	540	0	535	0	535	0	540	0	0	538.571	1.42857
2.0961	0	545	0	535	0	540	0	540	0	535	0	535	0	540	0	0	538.571	1.42857
2.1069	0	545	0	535	0	540	0	540	0	535	0	535	0	540	0	0	538.571	1.42857
2.1178	0	545	0	535	0	540	0	540	0	535	0	535	0	540	0	0	538.571	1.42857
2.1286	0	545	0	535	0	540	0	540	0	535	0	535	0	540	0	0	538.571	1.42857
2.1395	0	545	0	535	0	540	0	540	0	535	0	535	0	540	0	0	538.571	1.42857
2.1504	0	545	0	535	0	540	0	540	0	535	0	535	0	540	0	0	538.571	1.42857
2.1612	0	545	0	535	0	540	0	540	0	535	0	535	0	540	0	0	538.571	1.42857
2.1721	0	545	0	535	0	540	0	540	0	535	0	535	0	540	0	0	538.571	1.42857
2.1829	0	545	0	535	0	540	0	540	0	535	0	535	0	540	0	0	538.571	1.42857
2.1938	0	545	0	535	0	540	0	540	0	535	0	535	0	540	0	0	538.571	1.42857
2.2047	0	545	0	535	0	540	0	540	0	535	0	535	0	540	0	0	538.571	1.42857
2.2155	0	545	0	535	0	540	0	540	0	535	0	535	0	540	0	0	538.571	1.42857
2.2264	0	545	0	535	0	540	0	540	0	535	0	535	0	540	0	0	538.571	1.42857
2.2372	0	545	0	535	0	540	0	540	0	535	0	535	0	540	0	0	538.571	1.42857
2.2481	0	545	0	535	0	540	0	540	0	535	0	535	0	540	0	0	538.571	1.42857
2.259	0	545	0	535	0	540	0	540	0	535	0	535	0	540	0	0	538.571	1.42857
2.2698	0	545	0	535	0	540	0	540	0	535	0	535	0	540	0	0	538.571	1.42857
2.2807	0	545	0	535	0	540	0	540	0	535	0	535	0	540	0	0	538.571	1.42857
2.2916	0	545	0	535	0	540	0	540	0	535	0	535	0	540	0	0	538.571	1.42857
2.3024	0	545	0	535	0	540	0	540	0	535	0	535	0	540	0	0	538.571	1.42857
2.3133	0	545	0	535	0	540	0	540	0	535	0	535	0	540	0	0	538.571	1.42857
2.3241	0	545	0	535	0	540	0	540	0	535	0	535	0	540	0	0	538.571	1.42857
2.335	0	545	0	535	0	540	0	540	0	535	0	535	0	540	0	0	538.571	1.42857
2.3459	0	545	0	535	0	540	0	540	0	535	0	535	0	540	0	0	538.571	1.42857
2.3567	0	545	0	535	0	540	0	540	0	535	0	535	0	540	0	0	538.571	1.42857
2.3676	0	545	0	535	0	540	0	540	0	535	0	535	0	540	0	0	538.571	1.42857
2.3784	0	545	0	535	0	540	0	540	0	535	0	535	0	540	0	0	538.571	1.42857
2.3893	0	545	0	535	0	540	0	540	0	535	0	535	0	540	0	0	538.571	1.42857
2.4002	0	545	0	535	0	540	0	540	0	535	0	535	0	540	0	0	538.571	1.42857
2.411	0	545	0	535	0	540	0	540	0	535	0	535	0	540	0	0	538.571	1.42857
2.4219	0	545	0	535	0	540	0	540	0	535	0	535	0	540	0	0	538.571	1.42857
2.4327	0	545	0	535	0	540	0	540	0	535	0	535	0	540	0	0	538.571	1.42857
2.4436	0	545	0	535	0	540	0	540	0	535	0	535	0	540	0	0	538.571	1.42857
2.4545	0	545	0	535	0	540	0	540	0	535	0	535	0	540	0	0	538.571	1.42857
2.4653	0	545	0	535	0	540	0	540	0	535	0	535	0	540	0	0	538.571	1.42857
2.4762	0	545	0	535	0	540	0	540	0	535	0	535	0	540	0	0	538.571	1.42857
2.487	0	545	0	535	0	540	0	540	0	535	0	535	0	540	0	0	538.571	1.42857
2.4979	0	545	0	535	0	540	0	540	0	535	0	535	0	540	0	0	538.571	1.42857
2.5088	0	545	0	535	0	540	0	540	0	535	0	535	0	540	0	0	538.571	1.42857
2.5196	0	545	0	535	0	540	0	540	0	535	0	535	0	540	0	0	538.571	1.42857
2.5305	0	545	0	535	0	540	0	540	0	535	0	535	0	540	0	0	538.571	1.42857
2.5413	0	545	0	535	0	540	0	540	0	535	0	535	0	540	0	0	538.571	1.42857
2.5522	0	545	0	535	0	540	0	540	0	535	0	535	0	540	0	0	538.571	1.42857
2.5631	0	545	0	535	0	540	0	540	0	535	0	535	0	540	0	0	538.571	1.42857
2.5739	0	545	0	535	0	540	0	540	0	535	0	535	0	540	0	0	538.571	1.42857
2.5848	0	545	0	535	0	540	0	540	0	535	0	535	0	540	0	0	538.571	1.42857
2.5956	0	545	0	535	0	540	0	540	0	535	0	535	0	540	0	0	538.571	1.42857
2.6065	0	545	0	535	0	540	0	540	0	535	0	535	0	540	0	0	538.571	1.42857
2.6174	0	545	0	535	0	540	0	540	0	535	0	535	0	540	0	0	538.571	1.42857
2.6282	0	545	0	535	0	540	0	540	0	535	0	535	0	540	0	0	538.571	1.42857
2.6391	0	545	0	535	0	540	0	540	0	535	0	535	0	540	0	0	538.571	1.42857
2.6499	0	545	0	535	0	540	0	540	0	535	0	535	0	540	0	0	538.571	1.42857
2.6608	0	545	0	535	0	540	0	540	0	535	0	535	0	540	0	0	538.571	1.42857
2.6717	0	545	0	535	0	540	0	540	0	535	0	535	0	540	0	0	538.571	1.42857
2.6825	0	545	0	535	0	540	0	540	0	535	0	535	0	540	0	0	538.571	1.42857
2.6934	0	545	0	535	0	540	0	540	0	535	0	535	0	540	0	0	538.571	1.42857
2.7042	0	545	0	535	0	540	0	540	0	535	0	535	0	540	0	0	538.571	1.42857
2.7151	0	545	0	535	0	540	0	540	0	535	0	535	0	540	0	0	538.571	1.42857
2.726	0	545	0	535	0	540	0	540	0	535	0	535	0	540	0	0	538.571	1.42857
2.7368	0	545	0	535	0	540	0	540	0	535	0	535	0	540	0	0	538.571	1.42857
2.7477	0	545	0	535	0	540	0	540	0	535	0	535	0	540	0	0	538.571	1.42857
2.7586	0	545	0	535	0	540	0	540	0	535	0	535	0	540	0	0	538.571	1.42857
2.7694	0	545	0	535	0	540	0	540	0	535	0	535	0	540	0	0	538.571	1.42857
2.7803	0	545	0	535	0	540	0	540	0	535	0	535	0	540	0	0	538.571	1.42857
2.7911	0	545	0	535	0	540	0	540	0	535	0	535	0	540	0	0	538.571	1.42857
2.802	0	545	0	535	0	540	0	540	0	535	0	535	0	540	0	0	538.571	1.42857
2.8129	0	545	0	535	0	540	0	540	0	535	0	535	0	540	0	0	538.571	1.42857
2.8237	0	545	0	535	0	540	0	540	0	535	0	535	0	540	0	0	538.571	1.42857
2.8346	0	545	0	535	0	540	0	540	0	535	0	535	0	540	0	0	538.571	1.42857
2.8454	0	545	0	535	0	540	0	540	0	535	0	535	0	540	0	0	538.571	1.42857
2.8563	0	545	0	535	0	540	0	540	0	535	0	535	0	540	0	0	538.571	1.42857
2.8672	0	545	0	535	0	540	0	540	0	535	0	535	0	540	0	0	538.571	1.42857
2.878	0	545	0	535	0	540	0	540	0	535	0	535	0	540	0	0	538.571	1.42857
2.8889	0	545	0	535	0	540	0	540	0	535	0	535	0	540	0	0	538.571	1.42857
2.8997	0	545	0	535	0	540	0	540	0	535	0	535	0	540	0	0	538.571	1.42857
2.9106	0	545	0	535	0	540	0	540	0	535	0	535	0	540	0	0	538.571	1.42857
2.9215	0	545	0	535	0	540	0	540	0	535	0	535	0	540	0	0	538.571	1.42857
2.9323	0	545	0	535	0	540	0	540	0	535	0	535	0	540	0	0	538.571	1.42857
2.9432	0	545	0	535	0	540	0	540	0	535	0	535	0	540	0	0	538.571	1.42857
2.954	0	545	0	535	0	540	0	540	0	535	0	535	0	540	0	0	538.571	1.42857
2.9649	0	545	0	535	0	540	0	540	0	535	0	535	0	540	0	0	538.571	1.42857
2.9758	0	545	0	535	0	540	0	540	0	535	0	535	0	540	0	0	538.571	1.42857
2.9866	0	545	0	535	0	540	0	540	0	535	0	535	0	540	0	0	538.571	1.42857
2.9975	0	545	0	535	0	540	0	540	0	535	0	535	0	540	0	0	538.571	1.42857
3.0083	0	545	0	535	0	540	0	540	0	535	0	535	0	540	0	0	538.571	1.42857
3.0192	0	545	0	535	0	540	0	540	0	535	0	535	0	540	0	0	538.571	1.42857
3.0301	0	545	0	535	0	540	0	540	0	535	0	535	0	540	0	0	538.571	1.42857
3.0409	0	545	0	535	0	540	0	540	0	535	0	535	0	540	0	0	538.571	1.42857
3.0518	0	545	0	535	0	540	0	540	0	535	0	535	0	540	0	0	538.571	1.42857
3.0626	0	545	0	535	0	540	0	540	0	535	0	535	0	540	0	0	538.571	1.42857
3.0735	0	545	0	535	0	540	0	540	0	535	0	535	0	540	0	0	538.571	1.42857
3.0844	0	545	0	535	0	540	0	540	0	535	0	535	0	540	0	0	538.571	1.42857
3.0952	0	545	0	535	0	540	0	540	0	535	0	535	0	540	0	0	538.571	1.42857
3.1061	0	545	0	535	0	540	0	540	0	535	0	535	0	540	0	0	538.571	1.42857
3.1169	0	545	0	535	0	540	0	540	0	535	0	535	0	540	0	0	538.571	1.42857
3.1278	0	545	0	535	0	540	0	540	0	535	0	535	0	540	0	0	538.571	1.42857
3.1387	0	545	0	535	0	540	0	540	0	535	0	535	0	540	0	0	538.571	1.42857
3.1495	0	545	0	535	0	540	0	540	0	535	0	535	0	540	0	0	538.571	1.42857
3.1604	0	545	0	535	0	540	0	540	0	535	0	535	0	540	0	0	538.571	1.42857
3.1712	0	545	0	535	0	540	0	540	0	535	0	535	0	540	0	0	538.571	1.42857
3.1821	0	545	0	535	0	540	0	540	0	535	0	535	0	540	0	0	538.571	1.42857
3.193	0	545	0	535	0	540	0	540	0	535	0	535	0	540	0	0	538.571	1.42857
3.2038	0	545	0	535	0	540	0	540	0	535	0	535	0	540	0	0	538.571	1.42857
3.2147	0	545	0	535	0	540	0	540	0	535	0	535	0	540	0	0	538.571	1.42857
3.2255	0	545	0	535	0	540	0	540	0	535	0	535	0	540	0	0	538.571	1.42857
3.2364	0	545	0	535	0	540	0	540	0	535	0	535	0	540	0	0	538.571	1.42857
3.2473	0	545	0	535	0	540	0	540	0	535	0	535	0	540	0	0	538.571	1.42857
3.2581	0	545	0	535	0	540	0	540	0	535	0	535	0	540	0	0	538.571	1.42857
3.269	0	545	0	535	0	540	0	540	0	535	0	535	0	540	0	0	538.571	1.42857
3.2799	0	545	0	535	0	540	0	540	0	535	0	535	0	540	0	0	538.571	1.42857
3.2907	0	545	0	535	0	540	0	540	0	535	0	535	0	540	0	0	538.571	1.42857
3.3016	0	545	0	535	0	540	0	540	0	535	0	535	0	540	0	0	538.571	1.42857
3.3124	0	545	0	535	0	540	0	540	0	535	0	535	0	540	0	0	538.571	1.42857
3.3233	0	545	0	535	0	540	0	540	0	535	0	535	0	540	0	0	538.571	1.42857
3.3342	0	545	0	535	0	540	0	540	0	535	0	535	0	540	0	0	538.571	1.42857
3.345	0	545	0	535	0	540	0	540	0	535	0	535	0	540	0	0	538.571	1.42857
3.3559	0	545	0	535	0	540	0	540	0	535	0	535	0	540	0	0	538.571	1.42857
3.3667	0	545	0	535	0	540	0	540	0	535	0	535	0	540	0	0	538.571	1.42857
3.3776	0	545	0	535	0	540	0	540	0	535	0	535	0	540	0	0	538.571	1.42857
3.3885	0	545	0	535	0	540	0	540	0	535	0	535	0	540	0	0	538.571	1.42857
3.3993	0	545	0	535	0	540	0	540	0	535	0	535	0	540	0	0	538.571	1.42857
3.4102	0	545	0	535	0	540	0	540	0	535	0	535	0	540	0	0	538.571	1.42857
3.421	0	545	0	535	0	540	0	540	0	535	0	535	0	540	0	0	538.571	1.42857
3.4319	0	545	0	535	0	540	0	540	0	535	0	535	0	540	0	0	538.571	1.42857
3.4428	0	545	0	535	0	540	0	540	0	535	0	535	0	540	0	0	538.571	1.42857
3.4536	0	545	0	535	0	540	0	540	0	535	0	535	0	540	0	0	538.571	1.42857
3.4645	0	545	0	535	0	540	0	540	0	535	0	535	0	540	0	0	538.571	1.42857
3.4753	0	545	0	535	0	540	0	540	0	535	0	535	0	540	0	0	538.571	1.42857
3.4862	0	545	0	535	0	540	0	540	0	535	0	535	0	540	0	0	538.571	1.42857
3.4971	0	545	0	535	0	540	0	540	0	535	0	535	0	540	0	0	538.571	1.42857
3.5079	0	545	0	535	0	540	0	540	0	535	0	535	0	540	0	0	538.571	1.42857
3.5188	0	545	0	535	0	540	0	540	0	535	0	535	0	540	0	0	538.571	1.42857
3.5296	0	545	0	535	0	540	0	540	0	535	0	535	0	540	0	0	538.571	1.42857
3.5405	0	545	0	535	0	540	0	540	0	535	0	535	0	540	0	0	538.571	1.42857
3.5514	0	545	0	535	0	540	0	540	0	535	0	535	0	540	0	0	538.571	1.42857
3.5622	0	545	0	535	0	540	0	540	0	535	0	535	0	540	0	0	538.571	1.42857
3.5731	0	545	0	535	0	540	0	540	0	535	0	535	0	540	0	0	538.571	1.42857
3.5839	0	545	0	535	0	540	0	540	0	535	0	535	0	540	0	0	538.571	1.42857
3.5948	0	545	0	535	0	540	0	540	0	535	0	535	0	540	0	0	538.571	1.42857
3.6057	0	545	0	535	0	540	0	540	0	535	0	535	0	540	0	0	538.571	1.42857
3.6165	0	545	0	535	0	540	0	540	0	535	0	535	0	540	0	0	538.571	1.42857
3.6274	0	545	0	535	0	540	0	540	0	535	0	535	0	540	0	0	538.571	1.42857
3.6382	0	545	0	535	0	540	0	540	0	535	0	535	0	540	0	0	538.571	1.42857
3.6491	0	545	0	535	0	540	0	540	0	535	0	535	0	540	0	0	538.571	1.42857
3.66	0	545	0	535	0	540	0	540	0	535	0	535	0	540	0	0	538.571	1.42857
3.6708	0	545	0	535	0	540	0	540	0	535	0	535	0	540	0	0	538.571	1.42857
3.6817	0	545	0	535	0	540	0	540	0	535	0	535	0	540	0	0	538.571	1.42857
3.6925	0	545	0	535	0	540	0	540	0	535	0	535	0	540	0	0	538.571	1.42857
3.7034	0	545	0	535	0	540	0	540	0	535	0	535	0	540	0	0	538.571	1.42857
3.7143	0	545	0	535	0	540	0	540	0	535	0	535	0	540	0	0	538.571	1.42857
3.7251	0	545	0	535	0	540	0	540	0	535	0	535	0	540	0	0	538.571	1.42857
3.736	0	545	0	535	0	540	0	540	0	535	0	535	0	540	0	0	538.571	1.42857
3.7469	0	545	0	535	0	540	0	540	0	535	0	535	0	540	0	0	538.571	1.42857
3.7577	0	545	0	535	0	540	0	540	0	535	0	535	0	540	0	0	538.571	1.42857
3.7686	0	545	0	535	0	540	0	540	0	535	0	535	0	540	0	0	538.571	1.42857
3.7794	0	545	0	535	0	540	0	540	0	535	0	535	0	540	0	0	538.571	1.42857
3.7903	0	545	0	535	0	540	0	540	0	535	0	535	0	540	0	0	538.571	1.42857
3.8012	0	545	0	535	0	540	0	540	0	535	0	535	0	540	0	0	538.571	1.42857
3.812	0	545	0	535	0	540	0	540	0	535	0	535	0	540	0	0	538.571	1.42857
3.8229	0	545	0	535	0	540	0	540	0	535	0	535	0	540	0	0	538.571	1.42857
3.8337	0	545	0	535	0	540	0	540	0	535	0	535	0	540	0	0	538.571	1.42857
3.8446	0	545	0	535	0	540	0	540	0	535	0	535	0	540	0	0	538.571	1.42857
3.8555	0	545	0	535	0	540	0	540	0	535	0	535	0	540	0	0	538.571	1.42857
3.8663	0	545	0	535	0	540	0	540	0	535	0	535	0	540	0	0	538.571	1.42857
3.8772	0	545	0	535	0	540	0	540	0	535	0	535	0	540	0	0	538.571	1.42857
3.888	0	545	0	535	0	540	0	540	0	535	0	535	0	540	0	0	538.571	1.42857
3.8989	0	545	0	535	0	540	0	540	0	535	0	535	0	540	0	0	538.571	1.42857
3.9098	0	545	0	535	0	540	0	540	0	535	0	535	0	540	0	0	538.571	1.42857
3.9206	0	545	0	535	0	540	0	540	0	535	0	535	0	540	0	0	538.571	1.42857
3.9315	0	545	0	535	0	540	0	540	0	535	0	535	0	540	0	0	538.571	1.42857
3.9423	0	545	0	535	0	540	0	540	0	535	0	535	0	540	0	0	538.571	1.42857
3.9532	0	545	0	535	0	540	0	540	0	535	0	535	0	540	0	0	538.571	1.42857
3.9641	0	545	0	535	0	540	0	540	0	535	0	535	0	540	0	0	538.571	1.42857
3.9749	0	545	0	535	0	540	0	540	0	535	0	535	0	540	0	0	538.571	1.42857
3.9858	0	545	0	535	0	540	0	540	0	535	0	535	0	540	0	0	538.571	1.42857
3.9966	0	545	0	535	0	540	0	540	0	535	0	535	0	540	0	0	538.571	1.42857
4.0075	0	545	0	535	0	540	0	540	0	535	0	535	0	540	0	0	538.571	1.42857
4.0184	0	545	0	535	0	540	0	540	0	535	0	535	0	540	0	0	538.571	1.42857
4.0292	0	545	0	535	0	540	0	540	0	535	0	535	0	540	0	0	538.571	1.42857
4.0401	0	545	0	535	0	540	0	540	0	535	0	535	0	540	0	0	538.571	1.42857
4.0509	0	545	0	535	0	540	0	540	0	535	0	535	0	540	0	0	538.571	1.42857
4.0618	0	545	0	535	0	540	0	540	0	535	0	535	0	540	0	0	538.571	1.42857
4.0727	0	545	0	535	0	540	0	540	0	535	0	535	0	540	0	0	538.571	1.42857
4.0835	0	545	0	535	0	540	0	540	0	535	0	535	0	540	0	0	538.571	1.42857
4.0944	0	545	0	535	0	540	0	540	0	535	0	535	0	540	0	0	538.571	1.42857
4.1052	0	545	0	535	0	540	0	540	0	535	0	535	0	540	0	0	538.571	1.42857
4.1161	0	545	0	535	0	540	0	540	0	535	0	535	0	540	0	0	538.571	1.42857
4.127	0	545	0	535	0	540	0	540	0	535	0	535	0	540	0	0	538.571	1.42857
4.1378	0	545	0	535	0	540	0	540	0	535	0	535	0	540	0	0	538.571	1.42857
4.1487	0	545	0	535	0	540	0	540	0	535	0	535	0	540	0	0	538.571	1.42857
4.1595	0	545	0	535	0	540	0	540	0	535	0	535	0	540	0	0	538.571	1.42857
4.1704	0	545	0	535	0	540	0	540	0	535	0	535	0	540	0	0	538.571	1.42857
4.1813	0	545	0	535	0	540	0	540	0	535	0	535	0	540	0	0	538.571	1.42857
4.1921	0	545	0	535	0	540	0	540	0	535	0	535	0	540	0	0	538.571	1.42857
4.203	0	545	0	535	0	540	0	540	0	535	0	535	0	540	0	0	538.571	1.42857
4.2138	0	545	0	535	0	540	0	540	0	535	0	535	0	540	0	0	538.571	1.42857
4.2247	0	545	0	535	0	540	0	540	0	535	0	535	0	540	0	0	538.571	1.42857
4.2356	0	545	0	535	0	540	0	540	0	535	0	535	0	540	0	0	538.571	1.42857
4.2464	0	545	0	535	0	540	0	540	0	535	0	535	0	540	0	0	538.571	1.42857
4.2573	0	545	0	535	0	540	0	540	0	535	0	535	0	540	0	0	538.571	1.42857
4.2682	0	545	0	535	0	540	0	540	0	535	0	535	0	540	0	0	538.571	1.42857
4.279	0	545	0	535	0	540	0	540	0	535	0	535	0	540	0	0	538.571	1.42857
4.2899	0	545	0	535	0	540	0	540	0	535	0	535	0	540	0	0	538.571	1.42857
4.3007	0	545	0	535	0	540	0	540	0	535	0	535	0	540	0	0	538.571	1.42857
4.3116	0	545	0	535	0	540	0	540	0	535	0	535	0	540	0	0	538.571	1.42857
4.3225	0	545	0	535	0	540	0	540	0	535	0	535	0	540	0	0	538.571	1.42857
4.3333	0	545	0	535	0	540	0	540	0	535	0	535	0	540	0	0	538.571	1.42857
4.3442	0	545	0	535	0	540	0	540	0	535	0	535	0	540	0	0	538.571	1.42857
4.355	0	545	0	535	0	540	0	540	0	535	0	535	0	540	0	0	538.571	1.42857
4.3659	0	545	0	535	0	540	0	540	0	535	0	535	0	540	0	0	538.571	1.42857
4.3768	0	545	0	535	0	540	0	540	0	535	0	535	0	540	0	0	538.571	1.42857
4.3876	0	545	0	535	0	540	0	540	0	535	0	535	0	540	0	0	538.571	1.42857
4.3985	0	545	0	535	0	540	0	540	0	535	0	535	0	540	0	0	538.571	1.42857
4.4093	0	545	0	535	0	540	0	540	0	535	0	535	0	540	0	0	538.571	1.42857
4.4202	0	545	0	535	0	540	0	540	0	535	0	535	0	540	0	0	538.571	1.42857
4.4311	0	545	0	535	0	540	0	540	0	535	0	535	0	540	0	0	538.571	1.42857
4.4419	0	545	0	535	0	540	0	540	0	535	0	535	0	540	0	0	538.571	1.42857
4.4528	0	545	0	535	0	540	0	540	0	535	0	535	0	540	0	0	538.571	1.42857
4.4636	0	545	0	535	0	540	0	540	0	535	0	535	0	540	0	0	538.571	1.42857
4.4745	0	545	0	535	0	540	0	540	0	535	0	535	0	540	0	0	538.571	1.42857
4.4854	0	545	0	535	0	540	0	540	0	535	0	535	0	540	0	0	538.571	1.42857
4.4962	0	545	0	535	0	540	0	540	0	535	0	535	0	540	0	0	538.571	1.42857
4.5071	0	545	0	535	0	540	0	540	0	535	0	535	0	540	0	0	538.571	1.42857
4.5179	0	545	0	535	0	540	0	540	0	535	0	535	0	540	0	0	538.571	1.42857
4.5288	0	545	0	535	0	540	0	540	0	535	0	535	0	540	0	0	538.571	1.42857
4.5397	0	545	0	535	0	540	0	540	0	535	0	535	0	540	0	0	538.571	1.42857
4.5505	0	545	0	535	0	540	0	540	0	535	0	535	0	540	0	0	538.571	1.42857
4.5614	0	545	0	535	0	540	0	540	0	535	0	535	0	540	0	0	538.571	1.42857
4.5722	0	545	0	535	0	540	0	540	0	535	0	535	0	540	0	0	538.571	1.42857
4.5831	0	545	0	535	0	540	0	540	0	535	0	535	0	540	0	0	538.571	1.42857
4.594	0	545	0	535	0	540	0	540	0	535	0	535	0	540	0	0	538.571	1.42857
4.6048	0	545	0	535	0	540	0	540	0	535	0	535	0	540	0	0	538.571	1.42857
4.6157	0	545	0	535	0	540	0	540	0	535	0	535	0	540	0	0	538.571	1.42857
4.6265	0	545	0	535	0	540	0	540	0	535	0	535	0	540	0	0	538.571	1.42857
4.6374	0	545	0	535	0	540	0	540	0	535	0	535	0	540	0	0	538.571	1.42857
4.6483	0	545	0	535	0	540	0	540	0	535	0	535	0	540	0	0	538.571	1.42857
4.6591	0	545	0	535	0	540	0	540	0	535	0	535	0	540	0	0	538.571	1.42857
4.67	0	545	0	535	0	540	0	540	0	535	0	535	0	540	0	0	538.571	1.42857
4.6808	0	545	0	535	0	540	0	540	0	535	0	535	0	540	0	0	538.571	1.42857
4.6917	0	545	0	535	0	540	0	540	0	535	0	535	0	540	0	0	538.571	1.42857
4.7026	0	545	0	535	0	540	0	540	0	535	0	535	0	540	0	0	538.571	1.42857
4.7134	0	545	0	535	0	540	0	540	0	535	0	535	0	540	0	0	538.571	1.42857
4.7243	0	545	0	535	0	540	0	540	0	535	0	535	0	540	0	0	538.571	1.42857
4.7352	0	545	0	535	0	540	0	540	0	535	0	535	0	540	0	0	538.571	1.42857
4.746	0	545	0	535	0	540	0	540	0	535	0	535	0	540	0	0	538.571	1.42857
4.7569	0	545	0	535	0	540	0	540	0	535	0	535	0	540	0	0	538.571	1.42857
4.7677	0	545	0	535	0	540	0	540	0	535	0	535	0	540	0	0	538.571	1.42857
4.7786	0	545	0	535	0	540	0	540	0	535	0	535	0	540	0	0	538.571	1.42857
4.7895	0	545	0	535	0	540	0	540	0	535	0	535	0	540	0	0	538.571	1.42857
4.8003	0	545	0	535	0	540	0	540	0	535	0	535	0	540	0	0	538.571	1.42857
4.8112	0	545	0	535	0	540	0	540	0	535	0	535	0	540	0	0	538.571	1.42857
4.822	0	545	0	535	0	540	0	540	0	535	0	535	0	540	0	0	538.571	1.42857
4.8329	0	545	0	535	0	540	0	540	0	535	0	535	0	540	0	0	538.571	1.42857
4.8438	0	545	0	535	0	540	0	540	0	535	0	535	0	540	0	0	538.571	1.42857
4.8546	0	545	0	535	0	540	0	540	0	535	0	535	0	540	0	0	538.571	1.42857
4.8655	0	545	0	535	0	540	0	540	0	535	0	535	0	540	0	0	538.571	1.42857
4.8763	0	545	0	535	0	540	0	540	0	535	0	535	0	540	0	0	538.571	1.42857
4.8872	0	545	0	535	0	540	0	540	0	535	0	535	0	540	0	0	538.571	1.42857
4.8981	0	545	0	535	0	540	0	540	0	535	0	535	0	540	0	0	538.571	1.42857
4.9089	0	545	0	535	0	540	0	540	0	535	0	535	0	540	0	0	538.571	1.42857
4.9198	0	545	0	535	0	540	0	540	0	535	0	535	0	540	0	0	538.571	1.42857
4.9306	0	545	0	535	0	540	0	540	0	535	0	535	0	540	0	0	538.571	1.42857
4.9415	0	545	0	535	0	540	0	540	0	535	0	535	0	540	0	0	538.571	1.42857
4.9524	0	545	0	535	0	540	0	540	0	535	0	535	0	540	0	0	538.571	1.42857
4.9632	0	545	0	535	0	540	0	540	0	535	0	535	0	540	0	0	538.571	1.42857
4.9741	0	545	0	535	0	540	0	540	0	535	0	535	0	540	0	0	538.571	1.42857
4.9849	0	545	0	535	0	540	0	540	0	535	0	535	0	540	0	0	538.571	1.42857
4.9958	0	545	0	535	0	540	0	540	0	535	0	535	0	540	0	0	538.571	1.42857
5.0067	0	545	0	535	0	540	0	540	0	535	0	535	0	540	0	0	538.571	1.42857
5.0175	0	545	0	535	0	540	0	540	0	535	0	535	0	540	0	0	538.571	1.42857
5.0284	0	545	0	535	0	540	0	540	0	535	0	535	0	540	0	0	538.571	1.42857
5.0392	0	545	0	535	0	540	0	540	0	535	0	535	0	540	0	0	538.571	1.42857
5.0501	0	545	0	535	0	540	0	540	0	535	0	535	0	540	0	0	538.571	1.42857
5.061	0	545	0	535	0	540	0	540	0	535	0	535	0	540	0	0	538.571	1.42857
5.0718	0	545	0	535	0	540	0	540	0	535	0	535	0	540	0	0	538.571	1.42857
5.0827	0	545	0	535	0	540	0	540	0	535	0	535	0	540	0	0	538.571	1.42857
5.0935	0	545	0	535	0	540	0	540	0	535	0	535	0	540	0	0	538.571	1.42857
5.1044	0	545	0	535	0	540	0	540	0	535	0	535	0	540	0	0	538.571	1.42857
5.1153	0	545	0	535	0	540	0	540	0	535	0	535	0	540	0	0	538.571	1.42857
5.1261	0	545	0	535	0	540	0	540	0	535	0	535	0	540	0	0	538.571	1.42857
5.137	0	545	0	535	0	540	0	540	0	535	0	535	0	540	0	0	538.571	1.42857
5.1478	0	545	0	535	0	540	0	540	0	535	0	535	0	540	0	0	538.571	1.42857
5.1587	0	545	0	535	0	540	0	540	0	535	0	535	0	540	0	0	538.571	1.42857
5.1696	0	545	0	535	0	540	0	540	0	535	0	535	0	540	0	0	538.571	1.42857
5.1804	0	545	0	535	0	540	0	540	0	535	0	535	0	540	0	0	538.571	1.42857
5.1913	0	545	0	535	0	540	0	540	0	535	0	535	0	540	0	0	538.571	1.42857
5.2021	0	545	0	535	0	540	0	540	0	535	0	535	0	540	0	0	538.571	1.42857
5.213	0	545	0	535	0	540	0	540	0	535	0	535	0	540	0	0	538.571	1.42857
5.2239	0	545	0	535	0	540	0	540	0	535	0	535	0	540	0	0	538.571	1.42857
5.2347	0	545	0	535	0	540	0	540	0	535	0	535	0	540	0	0	538.571	1.42857
5.2456	0	545	0	535	0	540	0	540	0	535	0	535	0	540	0	0	538.571	1.42857
5.2565	0	545	0	535	0	540	0	540	0	535	0	535	0	540	0	0	538.571	1.42857
5.2673	0	545	0	535	0	540	0	540	0	535	0	535	0	540	0	0	538.571	1.42857
5.2782	0	545	0	535	0	540	0	540	0	535	0	535	0	540	0	0	538.571	1.42857
5.289	0	545	0	535	0	540	0	540	0	535	0	535	0	540	0	0	538.571	1.42857
5.2999	0	545	0	535	0	540	0	540	0	535	0	535	0	540	0	0	538.571	1.42857
5.3108	0	545	0	535	0	540	0	540	0	535	0	535	0	540	0	0	538.571	1.42857
5.3216	0	545	0	535	0	540	0	540	0	535	0	535	0	540	0	0	538.571	1.42857
5.3325	0	545	0	535	0	540	0	540	0	535	0	535	0	540	0	0	538.571	1.42857
5.3433	0	545	0	535	0	540	0	540	0	535	0	535	0	540	0	0	538.571	1.42857
5.3542	0	545	0	535	0	540	0	540	0	535	0	535	0	540	0	0	538.571	1.42857
5.3651	0	545	0	535	0	540	0	540	0	535	0	535	0	540	0	0	538.571	1.42857
5.3759	0	545	0	535	0	540	0	540	0	535	0	535	0	540	0	0	538.571	1.42857
5.3868	0	545	0	535	0	540	0	540	0	535	0	535	0	540	0	0	538.571	1.42857
5.3976	0	545	0	535	0	540	0	540	0	535	0	535	0	540	0	0	538.571	1.42857
5.4085	0	545	0	535	0	540	0	540	0	535	0	535	0	540	0	0	538.571	1.42857
5.4194	0	545	0	535	0	540	0	540	0	535	0	535	0	540	0	0	538.571	1.42857
5.4302	0	545	0	535	0	540	0	540	0	535	0	535	0	540	0	0	538.571	1.42857
5.4411	0	545	0	535	0	540	0	540	0	535	0	535	0	540	0	0	538.571	1.42857
5.4519	0	545	0	535	0	540	0	540	0	535	0	535	0	540	0	0	538.571	1.42857
5.4628	0	545	0	535	0	540	0	540	0	535	0	535	0	540	0	0	538.571	1.42857
5.4737	0	545	0	535	0	540	0	540	0	535	0	535	0	540	0	0	538.571	1.42857
5.4845	0	545	0	535	0	540	0	540	0	535	0	535	0	540	0	0	538.571	1.42857
5.4954	0	545	0	535	0	540	0	540	0	535	0	535	0	540	0	0	538.571	1.42857
5.5062	0	545	0	535	0	540	0	540	0	535	0	535	0	540	0	0	538.571	1.42857
5.5171	0	545	0	535	0	540	0	540	0	535	0	535	0	540	0	0	538.571	1.42857
5.528	0	545	0	535	0	540	0	540	0	535	0	535	0	540	0	0	538.571	1.42857
5.5388	0	545	0	535	0	540	0	540	0	535	0	535	0	540	0	0	538.571	1.42857
5.5497	0	545	0	535	0	540	0	540	0	535	0	535	0	540	0	0	538.571	1.42857
5.5605	0	545	0	535	0	540	0	540	0	535	0	535	0	540	0	0	538.571	1.42857
5.5714	0	545	0	535	0	540	0	540	0	535	0	535	0	540	0	0	538.571	1.42857
5.5823	0	545	0	535	0	540	0	540	0	535	0	535	0	540	0	0	538.571	1.42857
5.5931	0	545	0	535	0	540	0	540	0	535	0	535	0	540	0	0	538.571	1.42857
5.604	0	545	0	535	0	540	0	540	0	535	0	535	0	540	0	0	538.571	1.42857
5.6148	0	545	0	535	0	540	0	540	0	535	0	535	0	540	0	0	538.571	1.42857
5.6257	0	545	0	535	0	540	0	540	0	535	0	535	0	540	0	0	538.571	1.42857
5.6366	0	545	0	535	0	540	0	540	0	535	0	535	0	540	0	0	538.571	1.42857
5.6474	0	545	0	535	0	540	0	540	0	535	0	535	0	540	0	0	538.571	1.42857
5.6583	0	545	0	535	0	540	0	540	0	535	0	535	0	540	0	0	538.571	1.42857
5.6691	0	545	0	535	0	540	0	540	0	535	0	535	0	540	0	0	538.571	1.42857
5.68	0	545	0	535	0	540	0	540	0	535	0	535	0	540	0	0	538.571	1.42857
5.6909	0	545	0	535	0	540	0	540	0	535	0	535	0	540	0	0	538.571	1.42857
5.7017	0	545	0	535	0	540	0	540	0	535	0	535	0	540	0	0	538.571	1.42857
5.7126	0	545	0	535	0	540	0	540	0	535	0	535	0	540	0	0	538.571	1.42857
5.7234	0	545	0	535	0	540	0	540	0	535	0	535	0	540	0	0	538.571	1.42857
5.7343	0	545	0	535	0	540	0	540	0	535	0	535	0	540	0	0	538.571	1.42857
5.7452	0	545	0	535	0	540	0	540	0	535	0	535	0	540	0	0	538.571	1.42857
5.756	0	545	0	535	0	540	0	540	0	535	0	535	0	540	0	0	538.571	1.42857
5.7669	0	545	0	535	0	540	0	540	0	535	0	535	0	540	0	0	538.571	1.42857
5.7778	0	545	0	535	0	540	0	540	0	535	0	535	0	540	0	0	538.571	1.42857
5.7886	0	545	0	535	0	540	0	540	0	535	0	535	0	540	0	0	538.571	1.42857
5.7995	0	545	0	535	0	540	0	540	0	535	0	535	0	540	0	0	538.571	1.42857
5.8103	0	545	0	535	0	540	0	540	0	535	0	535	0	540	0	0	538.571	1.42857
5.8212	0	545	0	535	0	540	0	540	0	535	0	535	0	540	0	0	538.571	1.42857
5.8321	0	545	0	535	0	540	0	540	0	535	0	535	0	540	0	0	538.571	1.42857
5.8429	0	545	0	535	0	540	0	540	0	535	0	535	0	540	0	0	538.571	1.42857
5.8538	0	545	0	535	0	540	0	540	0	535	0	535	0	540	0	0	538.571	1.42857
5.8646	0	545	0	535	0	540	0	540	0	535	0	535	0	540	0	0	538.571	1.42857
5.8755	0	545	0	535	0	540	0	540	0	535	0	535	0	540	0	0	538.571	1.42857
5.8864	0	545	0	535	0	540	0	540	0	535	0	535	0	540	0	0	538.571	1.42857
5.8972	0	545	0	535	0	540	0	540	0	535	0	535	0	540	0	0	538.571	1.42857
5.9081	0	545	0	535	0	540	0	540	0	535	0	535	0	540	0	0	538.571	1.42857
5.9189	0	545	0	535	0	540	0	540	0	535	0	535	0	540	0	0	538.571	1.42857
5.9298	0	545	0	535	0	540	0	540	0	535	0	535	0	540	0	0	538.571	1.42857
5.9407	0	545	0	535	0	540	0	540	0	535	0	535	0	540	0	0	538.571	1.42857
5.9515	0	545	0	535	0	540	0	540	0	535	0	535	0	540	0	0	538.571	1.42857
5.9624	0	545	0	535	0	540	0	540	0	535	0	535	0	540	0	0	538.571	1.42857
5.9732	0	545	0	535	0	540	0	540	0	535	0	535	0	540	0	0	538.571	1.42857
5.9841	0	545	0	535	0	540	0	540	0	535	0	535	0	540	0	0	538.571	1.42857
5.995	0	545	0	535	0	540	0	540	0	535	0	535	0	540	0	0	538.571	1.42857
6.0058	0	545	0	535	0	540	0	540	0	535	0	535	0	540	0	0	538.571	1.42857
6.0167	0	545	0	535	0	540	0	540	0	535	0	535	0	540	0	0	538.571	1.42857
6.0275	0	545	0	535	0	540	0	540	0	535	0	535	0	540	0	0	538.571	1.42857
6.0384	0	545	0	535	0	540	0	540	0	535	0	535	0	540	0	0	538.571	1.42857
6.0493	0	545	0	535	0	540	0	540	0	535	0	535	0	540	0	0	538.571	1.42857
6.0601	0	545	0	535	0	540	0	540	0	535	0	535	0	540	0	0	538.571	1.42857
6.071	0	545	0	535	0	540	0	540	0	535	0	535	0	540	0	0	538.571	1.42857
6.0818	0	545	0	535	0	540	0	540	0	535	0	535	0	540	0	0	538.571	1.42857
6.0927	0	545	0	535	0	540	0	540	0	535	0	535	0	540	0	0	538.571	1.42857
6.1036	0	545	0	535	0	540	0	540	0	535	0	535	0	540	0	0	538.571	1.42857
6.1144	0	545	0	535	0	540	0	540	0	535	0	535	0	540	0	0	538.571	1.42857
6.1253	0	545	0	535	0	540	0	540	0	535	0	535	0	540	0	0	538.571	1.42857
6.1361	0	545	0	535	0	540	0	540	0	535	0	535	0	540	0	0	538.571	1.42857
6.147	0	545	0	535	0	540	0	540	0	535	0	535	0	540	0	0	538.571	1.42857
6.1579	0	545	0	535	0	540	0	540	0	535	0	535	0	540	0	0	538.571	1.42857
6.1687	0	545	0	535	0	540	0	540	0	535	0	535	0	540	0	0	538.571	1.42857
6.1796	0	545	0	535	0	540	0	540	0	535	0	535	0	540	0	0	538.571	1.42857
6.1904	0	545	0	535	0	540	0	540	0	535	0	535	0	540	0	0	538.571	1.42857
6.2013	0	545	0	535	0	540	0	540	0	535	0	535	0	540	0	0	538.571	1.42857
6.2122	0	545	0	535	0	540	0	540	0	535	0	535	0	540	0	0	538.571	1.42857
6.223	0	545	0	535	0	540	0	540	0	535	0	535	0	540	0	0	538.571	1.42857
6.2339	0	545	0	535	0	540	0	540	0	535	0	535	0	540	0	0	538.571	1.42857
6.2448	0	545	0	535	0	540	0	540	0	535	0	535	0	540	0	0	538.571	1.42857
6.2556	0	545	0	535	0	540	0	540	0	535	0	535	0	540	0	0	538.571	1.42857
6.2665	0	545	0	535	0	540	0	540	0	535	0	535	0	540	0	0	538.571	1.42857
6.2773	0	545	0	535	0	540	0	540	0	535	0	535	0	540	0	0	538.571	1.42857
6.2882	0	545	0	535	0	540	0	540	0	535	0	535	0	540	0	0	538.571	1.42857
6.2991	0	545	0	535	0	540	0	540	0	535	0	535	0	540	0	0	538.571	1.42857
6.3099	0	545	0	535	0	540	0	540	0	535	0	535	0	540	0	0	538.571	1.42857
6.3208	0	545	0	535	0	540	0	540	0	535	0	535	0	540	0	0	538.571	1.42857
6.3316	0	545	0	535	0	540	0	540	0	535	0	535	0	540	0	0	538.571	1.42857
6.3425	0	545	0	535	0	540	0	540	0	535	0	535	0	540	0	0	538.571	1.42857
6.3534	0	545	0	535	0	540	0	540	0	535	0	535	0	540	0	0	538.571	1.42857
6.3642	0	545	0	535	0	540	0	540	0	535	0	535	0	540	0	0	538.571	1.42857
6.3751	0	545	0	535	0	540	0	540	0	535	0	535	0	540	0	0	538.571	1.42857
6.3859	0	545	0	535	0	540	0	540	0	535	0	535	0	540	0	0	538.571	1.42857
6.3968	0	545	0	535	0	540	0	540	0	535	0	535	0	540	0	0	538.571	1.42857
6.4077	0	545	0	535	0	540	0	540	0	535	0	535	0	540	0	0	538.571	1.42857
6.4185	0	545	0	535	0	540	0	540	0	535	0	535	0	540	0	0	538.571	1.42857
6.4294	0	545	0	535	0	540	0	540	0	535	0	535	0	540	0	0	538.571	1.42857
6.4402	0	545	0	535	0	540	0	540	0	535	0	535	0	540	0	0	538.571	1.42857
6.4511	0	545	0	535	0	540	0	540	0	535	0	535	0	540	0	0	538.571	1.42857
6.462	0	545	0	535	0	540	0	540	0	535	0	535	0	540	0	0	538.571	1.42857
6.4728	0	545	0	535	0	540	0	540	0	535	0	535	0	540	0	0	538.571	1.42857
6.4837	0	545	0	535	0	540	0	540	0	535	0	535	0	540	0	0	538.571	1.42857
6.4945	0	545	0	535	0	540	0	540	0	535	0	535	0	540	0	0	538.571	1.42857
6.5054	0	545	0	535	0	540	0	540	0	535	0	535	0	540	0	0	538.571	1.42857
6.5163	0	545	0	535	0	540	0	540	0	535	0	535	0	540	0	0	538.571	1.42857
6.5271	0	545	0	535	0	540	0	540	0	535	0	535	0	540	0	0	538.571	1.42857
6.538	0	545	0	535	0	540	0	540	0	535	0	535	0	540	0	0	538.571	1.42857
6.5488	0	545	0	535	0	540	0	540	0	535	0	535	0	540	0	0	538.571	1.42857
6.5597	0	545	0	535	0	540	0	540	0	535	0	535	0	540	0	0	538.571	1.42857
6.5706	0	545	0	535	0	540	0	540	0	535	0	535	0	540	0	0	538.571	1.42857
6.5814	0	545	0	535	0	540	0	540	0	535	0	535	0	540	0	0	538.571	1.42857
6.5923	0	545	0	535	0	540	0	540	0	535	0	535	0	540	0	0	538.571	1.42857
6.6031	0	545	0	535	0	540	0	540	0	535	0	535	0	540	0	0	538.571	1.42857
6.614	0	545	0	535	0	540	0	540	0	535	0	535	0	540	0	0	538.571	1.42857
6.6249	0	545	0	535	0	540	0	540	0	535	0	535	0	540	0	0	538.571	1.42857
6.6357	0	545	0	535	0	540	0	540	0	535	0	535	0	540	0	0	538.571	1.42857
6.6466	0	545	0	535	0	540	0	540	0	535	0	535	0	540	0	0	538.571	1.42857
6.6574	0	545	0	535	0	540	0	540	0	535	0	535	0	540	0	0	538.571	1.42857
6.6683	0	545	0	535	0	540	0	540	0	535	0	535	0	540	0	0	538.571	1.42857
6.6792	0	545	0	535	0	540	0	540	0	535	0	535	0	540	0	0	538.571	1.42857
6.69	0	545	0	535	0	540	0	540	0	535	0	535	0	540	0	0	538.571	1.42857
6.7009	0	545	0	535	0	540	0	540	0	535	0	535	0	540	0	0	538.571	1.42857
6.7117	0	545	0	535	0	540	0	540	0	535	0	535	0	540	0	0	538.571	1.42857
6.7226	0	545	0	535	0	540	0	540	0	535	0	535	0	540	0	0	538.571	1.42857
6.7335	0	545	0	535	0	540	0	540	0	535	0	535	0	540	0	0	538.571	1.42857
6.7443	0	545	0	535	0	540	0	540	0	535	0	535	0	540	0	0	538.571	1.42857
6.7552	0	545	0	535	0	540	0	540	0	535	0	535	0	540	0	0	538.571	1.42857
6.7661	0	545	0	535	0	540	0	540	0	535	0	535	0	540	0	0	538.571	1.42857
6.7769	0	545	0	535	0	540	0	540	0	535	0	535	0	540	0	0	538.571	1.42857
6.7878	0	545	0	535	0	540	0	540	0	535	0	535	0	540	0	0	538.571	1.42857
6.7986	0	545	0	535	0	540	0	540	0	535	0	535	0	540	0	0	538.571	1.42857
6.8095	0	545	0	535	0	540	0	540	0	535	0	535	0	540	0	0	538.571	1.42857
6.8204	0	545	0	535	0	540	0	540	0	535	0	535	0	540	0	0	538.571	1.42857
6.8312	0	545	0	535	0	540	0	540	0	535	0	535	0	540	0	0	538.571	1.42857
6.8421	0	545	0	535	0	540	0	540	0	535	0	535	0	540	0	0	538.571	1.42857
6.8529	0	545	0	535	0	540	0	540	0	535	0	535	0	540	0	0	538.571	1.42857
6.8638	0	545	0	535	0	540	0	540	0	535	0	535	0	540	0	0	538.571	1.42857
6.8747	0	545	0	535	0	540	0	540	0	535	0	535	0	540	0	0	538.571	1.42857
6.8855	0	545	0	535	0	540	0	540	0	535	0	535	0	540	0	0	538.571	1.42857
6.8964	0	545	0	535	0	540	0	540	0	535	0	535	0	540	0	0	538.571	1.42857
6.9072	0	545	0	535	0	540	0	540	0	535	0	535	0	540	0	0	538.571	1.42857
6.9181	0	545	0	535	0	540	0	540	0	535	0	535	0	540	0	0	538.571	1.42857
6.929	0	545	0	535	0	540	0	540	0	535	0	535	0	540	0	0	538.571	1.42857
6.9398	0	545	0	535	0	540	0	540	0	535	0	535	0	540	0	0	538.571	1.42857
6.9507	0	545	0	535	0	540	0	540	0	535	0	535	0	540	0	0	538.571	1.42857
6.9615	0	545	0	535	0	540	0	540	0	535	0	535	0	540	0	0	538.571	1.42857
6.9724	0	545	0	535	0	540	0	540	0	535	0	535	0	540	0	0	538.571	1.42857
6.9833	0	545	0	535	0	540	0	540	0	535	0	535	0	540	0	0	538.571	1.42857
6.9941	0	545	0	535	0	540	0	540	0	535	0	535	0	540	0	0	538.571	1.42857
7.005	0	545	0	535	0	540	0	540	0	535	0	535	0	540	0	0	538.571	1.42857
7.0158	0	545	0	535	0	540	0	540	0	535	0	535	0	540	0	0	538.571	1.42857
7.0267	0	545	0	535	0	540	0	540	0	535	0	535	0	540	0	0	538.571	1.42857
7.0376	0	545	0	535	0	540	0	540	0	535	0	535	0	540	0	0	538.571	1.42857
7.0484	0	545	0	535	0	540	0	540	0	535	0	535	0	540	0	0	538.571	1.42857
7.0593	0	545	0	535	0	540	0	540	0	535	0	535	0	540	0	0	538.571	1.42857
7.0701	0	545	0	535	0	540	0	540	0	535	0	535	0	540	0	0	538.571	1.42857
7.081	0	545	0	535	0	540	0	540	0	535	0	535	0	540	0	0	538.571	1.42857
7.0919	0	545	0	535	0	540	0	540	0	535	0	535	0	540	0	0	538.571	1.42857
7.1027	0	545	0	535	0	540	0	540	0	535	0	535	0	540	0	0	538.571	1.42857
7.1136	0	545	0	535	0	540	0	540	0	535	0	535	0	540	0	0	538.571	1.42857
7.1244	0	545	0	535	0	540	0	540	0	535	0	535	0	540	0	0	538.571	1.42857
7.1353	0	545	0	535	0	540	0	540	0	535	0	535	0	540	0	0	538.571	1.42857
7.1462	0	545	0	535	0	540	0	540	0	535	0	535	0	540	0	0	538.571	1.42857
7.157	0	545	0	535	0	540	0	540	0	535	0	535	0	540	0	0	538.571	1.42857
7.1679	0	545	0	535	0	540	0	540	0	535	0	535	0	540	0	0	538.571	1.42857
7.1787	0	545	0	535	0	540	0	540	0	535	0	535	0	540	0	0	538.571	1.42857
7.1896	0	545	0	535	0	540	0	540	0	535	0	535	0	540	0	0	538.571	1.42857
7.2005	0	545	0	535	0	540	0	540	0	535	0	535	0	540	0	0	538.571	1.42857
7.2113	0	545	0	535	0	540	0	540	0	535	0	535	0	540	0	0	538.571	1.42857
7.2222	0	545	0	535	0	540	0	540	0	535	0	535	0	540	0	0	538.571	1.42857
7.2331	0	545	0	535	0	540	0	540	0	535	0	535	0	540	0	0	538.571	1.42857
7.2439	0	545	0	535	0	540	0	540	0	535	0	535	0	540	0	0	538.571	1.42857
7.2548	0	545	0	535	0	540	0	540	0	535	0	535	0	540	0	0	538.571	1.42857
7.2656	0	545	0	535	0	540	0	540	0	535	0	535	0	540	0	0	538.571	1.42857
7.2765	0	545	0	535	0	540	0	540	0	535	0	535	0	540	0	0	538.571	1.42857
7.2874	0	545	0	535	0	540	0	540	0	535	0	535	0	540	0	0	538.571	1.42857
7.2982	0	545	0	535	0	540	0	540	0	535	0	535	0	540	0	0	538.571	1.42857
7.3091	0	545	0	535	0	540	0	540	0	535	0	535	0	540	0	0	538.571	1.42857
7.3199	0	545	0	535	0	540	0	540	0	535	0	535	0	540	0	0	538.571	1.42857
7.3308	0	545	0	535	0	540	0	540	0	535	0	535	0	540	0	0	538.571	1.42857
7.3417	0	545	0	535	0	540	0	540	0	535	0	535	0	540	0	0	538.571	1.42857
7.3525	0	545	0	535	0	540	0	540	0	535	0	535	0	540	0	0	538.571	1.42857
7.3634	0	545	0	535	0	540	0	540	0	535	0	535	0	540	0	0	538.571	1.42857
7.3742	0	545	0	535	0	540	0	540	0	535	0	535	0	540	0	0	538.571	1.42857
7.3851	0	545	0	535	0	540	0	540	0	535	0	535	0	540	0	0	538.571	1.42857
7.396	0	545	0	535	0	540	0	540	0	535	0	535	0	540	0	0	538.571	1.42857
7.4068	0	545	0	535	0	540	0	540	0	535	0	535	0	540	0	0	538.571	1.42857
7.4177	0	545	0	535	0	540	0	540	0	535	0	535	0	540	0	0	538.571	1.42857
7.4285	0	545	0	535	0	540	0	540	0	535	0	535	0	540	0	0	538.571	1.42857
7.4394	0	545	0	535	0	540	0	540	0	535	0	535	0	540	0	0	538.571	1.42857
7.4503	0	545	0	535	0	540	0	540	0	535	0	535	0	540	0	0	538.571	1.42857
7.4611	0	545	0	535	0	540	0	540	0	535	0	535	0	540	0	0	538.571	1.42857
7.472	0	545	0	535	0	540	0	540	0	535	0	535	0	540	0	0	538.571	1.42857
7.4828	0	545	0	535	0	540	0	540	0	535	0	535	0	540	0	0	538.571	1.42857
7.4937	0	545	0	535	0	540	0	540	0	535	0	535	0	540	0	0	538.571	1.42857
7.5046	0	545	0	535	0	540	0	540	0	535	0	535	0	540	0	0	538.571	1.42857
7.5154	0	545	0	535	0	540	0	540	0	535	0	535	0	540	0	0	538.571	1.42857
7.5263	0	545	0	535	0	540	0	540	0	535	0	535	0	540	0	0	538.571	1.42857
7.5371	0	545	0	535	0	540	0	540	0	535	0	535	0	540	0	0	538.571	1.42857
7.548	0	545	0	535	0	540	0	540	0	535	0	535	0	540	0	0	538.571	1.42857
7.5589	0	545	0	535	0	540	0	540	0	535	0	535	0	540	0	0	538.571	1.42857
7.5697	0	545	0	535	0	540	0	540	0	535	0	535	0	540	0	0	538.571	1.42857
7.5806	0	545	0	535	0	540	0	540	0	535	0	535	0	540	0	0	538.571	1.42857
7.5914	0	545	0	535	0	540	0	540	0	535	0	535	0	540	0	0	538.571	1.42857
7.6023	0	545	0	535	0	540	0	540	0	535	0	535	0	540	0	0	538.571	1.42857
7.6132	0	545	0	535	0	540	0	540	0	535	0	535	0	540	0	0	538.571	1.42857
7.624	0	545	0	535	0	540	0	540	0	535	0	535	0	540	0	0	538.571	1.42857
7.6349	0	545	0	535	0	540	0	540	0	535	0	535	0	540	0	0	538.571	1.42857
7.6457	0	545	0	535	0	540	0	540	0	535	0	535	0	540	0	0	538.571	1.42857
7.6566	0	545	0	535	0	540	0	540	0	535	0	535	0	540	0	0	538.571	1.42857
7.6675	0	545	0	535	0	540	0	540	0	535	0	535	0	540	0	0	538.571	1.42857
7.6783	0	545	0	535	0	540	0	540	0	535	0	535	0	540	0	0	538.571	1.42857
7.6892	0	545	0	535	0	540	0	540	0	535	0	535	0	540	0	0	538.571	1.42857
7.7	0	545	0	535	0	540	0	540	0	535	0	535	0	540	0	0	538.571	1.42857
7.7109	0	545	0	535	0	540	0	540	0	535	0	535	0	540	0	0	538.571	1.42857
7.7218	0	545	0	535	0	540	0	540	0	535	0	535	0	540	0	0	538.571	1.42857
7.7326	0	545	0	535	0	540	0	540	0	535	0	535	0	540	0	0	538.571	1.42857
7.7435	0	545	0	535	0	540	0	540	0	535	0	535	0	540	0	0	538.571	1.42857
7.7544	0	545	0	535	0	540	0	540	0	535	0	535	0	540	0	0	538.571	1.42857
7.7652	0	545	0	535	0	540	0	540	0	535	0	535	0	540	0	0	538.571	1.42857
7.7761	0	545	0	535	0	540	0	540	0	535	0	535	0	540	0	0	538.571	1.42857
7.7869	0	545	0	535	0	540	0	540	0	535	0	535	0	540	0	0	538.571	1.42857
7.7978	0	545	0	535	0	540	0	540	0	535	0	535	0	540	0	0	538.571	1.42857
7.8087	0	545	0	535	0	540	0	540	0	535	0	535	0	540	0	0	538.571	1.42857
7.8195	0	545	0	535	0	540	0	540	0	535	0	535	0	540	0	0	538.571	1.42857
7.8304	0	545	0	535	0	540	0	540	0	535	0	535	0	540	0	0	538.571	1.42857
7.8412	0	545	0	535	0	540	0	540	0	535	0	535	0	540	0	0	538.571	1.42857
7.8521	0	545	0	535	0	540	0	540	0	535	0	535	0	540	0	0	538.571	1.42857
7.863	0	545	0	535	0	540	0	540	0	535	0	535	0	540	0	0	538.571	1.42857
7.8738	0	545	0	535	0	540	0	540	0	535	0	535	0	540	0	0	538.571	1.42857
7.8847	0	545	0	535	0	540	0	540	0	535	0	535	0	540	0	0	538.571	1.42857
7.8955	0	545	0	535	0	540	0	540	0	535	0	535	0	540	0	0	538.571	1.42857
7.9064	0	545	0	535	0	540	0	540	0	535	0	535	0	540	0	0	538.571	1.42857
7.9173	0	545	0	535	0	540	0	540	0	535	0	535	0	540	0	0	538.571	1.42857
7.9281	0	545	0	535	0	540	0	540	0	535	0	535	0	540	0	0	538.571	1.42857
7.939	0	545	0	535	0	540	0	540	0	535	0	535	0	540	0	0	538.571	1.42857
7.9498	0	545	0	535	0	540	0	540	0	535	0	535	0	540	0	0	538.571	1.42857
7.9607	0	545	0	535	0	540	0	540	0	535	0	535	0	540	0	0	538.571	1.42857
7.9716	0	545	0	535	0	540	0	540	0	535	0	535	0	540	0	0	538.571	1.42857
7.9824	0	545	0	535	0	540	0	540	0	535	0	535	0	540	0	0	538.571	1.42857
7.9933	0	545	0	535	0	540	0	540	0	535	0	535	0	540	0	0	538.571	1.42857
8.0041	0	545	0	535	0	540	0	540	0	535	0	535	0	540	0	0	538.571	1.42857
8.015	0	545	0	535	0	540	0	540	0	535	0	535	0	540	0	0	538.571	1.42857
8.0259	0	545	0	535	0	540	0	540	0	535	0	535	0	540	0	0	538.571	1.42857
8.0367	0	545	0	535	0	540	0	540	0	535	0	535	0	540	0	0	538.571	1.42857
8.0476	0	545	0	535	0	540	0	540	0	535	0	535	0	540	0	0	538.571	1.42857
8.0584	0	545	0	535	0	540	0	540	0	535	0	535	0	540	0	0	538.571	1.42857
8.0693	0	545	0	535	0	540	0	540	0	535	0	535	0	540	0	0	538.571	1.42857
8.0802	0	545	0	535	0	540	0	540	0	535	0	535	0	540	0	0	538.571	1.42857
8.091	0	545	0	535	0	540	0	540	0	535	0	535	0	540	0	0	538.571	1.42857
8.1019	0	545	0	535	0	540	0	540	0	535	0	535	0	540	0	0	538.571	1.42857
8.1127	0	545	0	535	0	540	0	540	0	535	0	535	0	540	0	0	538.571	1.42857
8.1236	0	545	0	535	0	540	0	540	0	535	0	535	0	540	0	0	538.571	1.42857
8.1345	0	545	0	535	0	540	0	540	0	535	0	535	0	540	0	0	538.571	1.42857
8.1453	0	545	0	535	0	540	0	540	0	535	0	535	0	540	0	0	538.571	1.42857
8.1562	0	545	0	535	0	540	0	540	0	535	0	535	0	540	0	0	538.571	1.42857
8.167	0	545	0	535	0	540	0	540	0	535	0	535	0	540	0	0	538.571	1.42857
8.1779	0	545	0	535	0	540	0	540	0	535	0	535	0	540	0	0	538.571	1.42857
8.1888	0	545	0	535	0	540	0	540	0	535	0	535	0	540	0	0	538.571	1.42857
8.1996	0	545	0	535	0	540	0	540	0	535	0	535	0	540	0	0	538.571	1.42857
8.2105	0	545	0	535	0	540	0	540	0	535	0	535	0	540	0	0	538.571	1.42857
8.2214	0	545	0	535	0	540	0	540	0	535	0	535	0	540	0	0	538.571	1.42857
8.2322	0	545	0	535	0	540	0	540	0	535	0	535	0	540	0	0	538.571	1.42857
8.2431	0	545	0	535	0	540	0	540	0	535	0	535	0	540	0	0	538.571	1.42857
8.2539	0	545	0	535	0	540	0	540	0	535	0	535	0	540	0	0	538.571	1.42857
8.2648	0	545	0	535	0	540	0	540	0	535	0	535	0	540	0	0	538.571	1.42857
8.2757	0	545	0	535	0	540	0	540	0	535	0	535	0	540	0	0	538.571	1.42857
8.2865	0	545	0	535	0	540	0	540	0	535	0	535	0	540	0	0	538.571	1.42857
8.2974	0	545	0	535	0	540	0	540	0	535	0	535	0	540	0	0	538.571	1.42857
8.3082	0	545	0	535	0	540	0	540	0	535	0	535	0	540	0	0	538.571	1.42857
8.3191	0	545	0	535	0	540	0	540	0	535	0	535	0	540	0	0	538.571	1.42857
8.33	0	545	0	535	0	540	0	540	0	535	0	535	0	540	0	0	538.571	1.42857
8.3408	0	545	0	535	0	540	0	540	0	535	0	535	0	540	0	0	538.571	1.42857
8.3517	0	545	0	535	0	540	0	540	0	535	0	535	0	540	0	0	538.571	1.42857
8.3625	0	545	0	535	0	540	0	540	0	535	0	535	0	540	0	0	538.571	1.42857
8.3734	0	545	0	535	0	540	0	540	0	535	0	535	0	540	0	0	538.571	1.42857
8.3843	0	545	0	535	0	540	0	540	0	535	0	535	0	540	0	0	538.571	1.42857
8.3951	0	545	0	535	0	540	0	540	0	535	0	535	0	540	0	0	538.571	1.42857
8.406	0	545	0	535	0	540	0	540	0	535	0	535	0	540	0	0	538.571	1.42857
8.4168	0	545	0	535	0	540	0	540	0	535	0	535	0	540	0	0	538.571	1.42857
8.4277	0	545	0	535	0	540	0	540	0	535	0	535	0	540	0	0	538.571	1.42857
8.4386	0	545	0	535	0	540	0	540	0	535	0	535	0	540	0	0	538.571	1.42857
8.4494	0	545	0	535	0	540	0	540	0	535	0	535	0	540	0	0	538.571	1.42857
8.4603	0	545	0	535	0	540	0	540	0	535	0	535	0	540	0	0	538.571	1.42857
8.4711	0	545	0	535	0	540	0	540	0	535	0	535	0	540	0	0	538.571	1.42857
8.482	0	545	0	535	0	540	0	540	0	535	0	535	0	540	0	0	538.571	1.42857
8.4929	0	545	0	535	0	540	0	540	0	535	0	535	0	540	0	0	538.571	1.42857
8.5037	0	545	0	535	0	540	0	540	0	535	0	535	0	540	0	0	538.571	1.42857
8.5146	0	545	0	535	0	540	0	540	0	535	0	535	0	540	0	0	538.571	1.42857
8.5254	0	545	0	535	0	540	0	540	0	535	0	535	0	540	0	0	538.571	1.42857
8.5363	0	545	0	535	0	540	0	540	0	535	0	535	0	540	0	0	538.571	1.42857
8.5472	0	545	0	535	0	540	0	540	0	535	0	535	0	540	0	0	538.571	1.42857
8.558	0	545	0	535	0	540	0	540	0	535	0	535	0	540	0	0	538.571	1.42857
8.5689	0	545	0	535	0	540	0	540	0	535	0	535	0	540	0	0	538.571	1.42857
8.5797	0	545	0	535	0	540	0	540	0	535	0	535	0	540	0	0	538.571	1.42857
8.5906	0	545	0	535	0	540	0	540	0	535	0	535	0	540	0	0	538.571	1.42857
8.6015	0	545	0	535	0	540	0	540	0	535	0	535	0	540	0	0	538.571	1.42857
8.6123	0	545	0	535	0	540	0	540	0	535	0	535	0	540	0	0	538.571	1.42857
8.6232	0	545	0	535	0	540	0	540	0	535	0	535	0	540	0	0	538.571	1.42857
8.634	0	545	0	535	0	540	0	540	0	535	0	535	0	540	0	0	538.571	1.42857
8.6449	0	545	0	535	0	540	0	540	0	535	0	535	0	540	0	0	538.571	1.42857
8.6558	0	545	0	535	0	540	0	540	0	535	0	535	0	540	0	0	538.571	1.42857
8.6666	0	545	0	535	0	540	0	540	0	535	0	535	0	540	0	0	538.571	1.42857
8.6775	0	545	0	535	0	540	0	540	0	535	0	535	0	540	0	0	538.571	1.42857
8.6883	0	545	0	535	0	540	0	540	0	535	0	535	0	540	0	0	538.571	1.42857
8.6992	0	545	0	535	0	540	0	540	0	535	0	535	0	540	0	0	538.571	1.42857
8.7101	0	545	0	535	0	540	0	540	0	535	0	535	0	540	0	0	538.571	1.42857
8.7209	0	545	0	535	0	540	0	540	0	535	0	535	0	540	0	0	538.571	1.42857
8.7318	0	545	0	535	0	540	0	540	0	535	0	535	0	540	0	0	538.571	1.42857
8.7427	0	545	0	535	0	540	0	540	0	535	0	535	0	540	0	0	538.571	1.42857
8.7535	0	545	0	535	0	540	0	540	0	535	0	535	0	540	0	0	538.571	1.42857
8.7644	0	545	0	535	0	540	0	540	0	535	0	535	0	540	0	0	538.571	1.42857
8.7752	0	545	0	535	0	540	0	540	0	535	0	535	0	540	0	0	538.571	1.42857
8.7861	0	545	0	535	0	540	0	540	0	535	0	535	0	540	0	0	538.571	1.42857
8.797	0	545	0	535	0	540	0	540	0	535	0	535	0	540	0	0	538.571	1.42857
8.8078	0	545	0	535	0	540	0	540	0	535	0	535	0	540	0	0	538.571	1.42857
8.8187	0	545	0	535	0	540	0	540	0	535	0	535	0	540	0	0	538.571	1.42857
8.8295	0	545	0	535	0	540	0	540	0	535	0	535	0	540	0	0	538.571	1.42857
8.8404	0	545	0	535	0	540	0	540	0	535	0	535	0	540	0	0	538.571	1.42857
8.8513	0	545	0	535	0	540	0	540	0	535	0	535	0	540	0	0	538.571	1.42857
8.8621	0	545	0	535	0	540	0	540	0	535	0	535	0	540	0	0	538.571	1.42857
8.873	0	545	0	535	0	540	0	540	0	535	0	535	0	540	0	0	538.571	1.42857
8.8838	0	545	0	535	0	540	0	540	0	535	0	535	0	540	0	0	538.571	1.42857
8.8947	0	545	0	535	0	540	0	540	0	535	0	535	0	540	0	0	538.571	1.42857
8.9056	0	545	0	535	0	540	0	540	0	535	0	535	0	540	0	0	538.571	1.42857
8.9164	0	545	0	535	0	540	0	540	0	535	0	535	0	540	0	0	538.571	1.42857
8.9273	0	545	0	535	0	540	0	540	0	535	0	535	0	540	0	0	538.571	1.42857
8.9381	0	545	0	535	0	540	0	540	0	535	0	535	0	540	0	0	538.571	1.42857
8.949	0	545	0	535	0	540	0	540	0	535	0	535	0	540	0	0	538.571	1.42857
8.9599	0	545	0	535	0	540	0	540	0	535	0	535	0	540	0	0	538.571	1.42857
8.9707	0	545	0	535	0	540	0	540	0	535	0	535	0	540	0	0	538.571	1.42857
8.9816	0	545	0	535	0	540	0	540	0	535	0	535	0	540	0	0	538.571	1.42857
8.9924	0	545	0	535	0	540	0	540	0	535	0	535	0	540	0	0	538.571	1.42857
9.0033	0	545	0	535	0	540	0	540	0	535	0	535	0	540	0	0	538.571	1.42857
9.0142	0	545	0	535	0	540	0	540	0	535	0	535	0	540	0	0	538.571	1.42857
9.025	0	545	0	535	0	540	0	540	0	535	0	535	0	540	0	0	538.571	1.42857
9.0359	0	545	0	535	0	540	0	540	0	535	0	535	0	540	0	0	538.571	1.42857
9.0467	0	545	0	535	0	540	0	540	0	535	0	535	0	540	0	0	538.571	1.42857
9.0576	0	545	0	535	0	540	0	540	0	535	0	535	0	540	0	0	538.571	1.42857
9.0685	0	545	0	535	0	540	0	540	0	535	0	535	0	540	0	0	538.571	1.42857
9.0793	0	545	0	535	0	540	0	540	0	535	0	535	0	540	0	0	538.571	1.42857
9.0902	0	545	0	535	0	540	0	540	0	535	0	535	0	540	0	0	538.571	1.42857
9.101	0	545	0	535	0	540	0	540	0	535	0	535	0	540	0	0	538.571	1.42857
9.1119	0	545	0	535	0	540	0	540	0	535	0	535	0	540	0	0	538.571	1.42857
9.1228	0	545	0	535	0	540	0	540	0	535	0	535	0	540	0	0	538.571	1.42857
9.1336	0	545	0	535	0	540	0	540	0	535	0	535	0	540	0	0	538.571	1.42857
9.1445	0	545	0	535	0	540	0	540	0	535	0	535	0	540	0	0	538.571	1.42857
9.1553	0	545	0	535	0	540	0	540	0	535	0	535	0	540	0	0	538.571	1.42857
9.1662	0	545	0	535	0	540	0	540	0	535	0	535	0	540	0	0	538.571	1.42857
9.1771	0	545	0	535	0	540	0	540	0	535	0	535	0	540	0	0	538.571	1.42857
9.1879	0	545	0	535	0	540	0	540	0	535	0	535	0	540	0	0	538.571	1.42857
9.1988	0	545	0	535	0	540	0	540	0	535	0	535	0	540	0	0	538.571	1.42857
9.2096	0	545	0	535	0	540	0	540	0	535	0	535	0	540	0	0	538.571	1.42857
9.2205	0	545	0	535	0	540	0	540	0	535	0	535	0	540	0	0	538.571	1.42857
9.2314	0	545	0	535	0	540	0	540	0	535	0	535	0	540	0	0	538.571	1.42857
9.2422	0	545	0	535	0	540	0	540	0	535	0	535	0	540	0	0	538.571	1.42857
9.2531	0	545	0	535	0	540	0	540	0	535	0	535	0	540	0	0	538.571	1.42857
9.264	0	545	0	535	0	540	0	540	0	535	0	535	0	540	0	0	538.571	1.42857
9.2748	0	545	0	535	0	540	0	540	0	535	0	535	0	540	0	0	538.571	1.42857
9.2857	0	545	0	535	0	540	0	540	0	535	0	535	0	540	0	0	538.571	1.42857
9.2965	0	545	0	535	0	540	0	540	0	535	0	535	0	540	0	0	538.571	1.42857
9.3074	0	545	0	535	0	540	0	540	0	535	0	535	0	540	0	0	538.571	1.42857
9.3183	0	545	0	535	0	540	0	540	0	535	0	535	0	540	0	0	538.571	1.42857
9.3291	0	545	0	535	0	540	0	540	0	535	0	535	0	540	0	0	538.571	1.42857
9.34	0	545	0	535	0	540	0	540	0	535	0	535	0	540	0	0	538.571	1.42857
9.3508	0	545	0	535	0	540	0	540	0	535	0	535	0	540	0	0	538.571	1.42857
9.3617	0	545	0	535	0	540	0	540	0	535	0	535	0	540	0	0	538.571	1.42857
9.3726	0	545	0	535	0	540	0	540	0	535	0	535	0	540	0	0	538.571	1.42857
9.3834	0	545	0	535	0	540	0	540	0	535	0	535	0	540	0	0	538.571	1.42857
9.3943	0	545	0	535	0	540	0	540	0	535	0	535	0	540	0	0	538.571	1.42857
9.4051	0	545	0	535	0	540	0	540	0	535	0	535	0	540	0	0	538.571	1.42857
9.416	0	545	0	535	0	540	0	540	0	535	0	535	0	540	0	0	538.571	1.42857
9.4269	0	545	0	535	0	540	0	540	0	535	0	535	0	540	0	0	538.571	1.42857
9.4377	0	545	0	535	0	540	0	540	0	535	0	535	0	540	0	0	538.571	1.42857
9.4486	0	545	0	535	0	540	0	540	0	535	0	535	0	540	0	0	538.571	1.42857
9.4594	0	545	0	535	0	540	0	540	0	535	0	535	0	540	0	0	538.571	1.42857
9.4703	0	545	0	535	0	540	0	540	0	535	0	535	0	540	0	0	538.571	1.42857
9.4812	0	545	0	535	0	540	0	540	0	535	0	535	0	540	0	0	538.571	1.42857
9.492	0	545	0	535	0	540	0	540	0	535	0	535	0	540	0	0	538.571	1.42857
9.5029	0	545	0	535	0	540	0	540	0	535	0	535	0	540	0	0	538.571	1.42857
9.5137	0	545	0	535	0	540	0	540	0	535	0	535	0	540	0	0	538.571	1.42857
9.5246	0	545	0	535	0	540	0	540	0	535	0	535	0	540	0	0	538.571	1.42857
9.5355	0	545	0	535	0	540	0	540	0	535	0	535	0	540	0	0	538.571	1.42857
9.5463	0	545	0	535	0	540	0	540	0	535	0	535	0	540	0	0	538.571	1.42857
9.5572	0	545	0	535	0	540	0	540	0	535	0	535	0	540	0	0	538.571	1.42857
9.568	0	545	0	535	0	540	0	540	0	535	0	535	0	540	0	0	538.571	1.42857
9.5789	0	545	0	535	0	540	0	540	0	535	0	535	0	540	0	0	538.571	1.42857
9.5898	0	545	0	535	0	540	0	540	0	535	0	535	0	540	0	0	538.571	1.42857
9.6006	0	545	0	535	0	540	0	540	0	535	0	535	0	540	0	0	538.571	1.42857
9.6115	0	545	0	535	0	540	0	540	0	535	0	535	0	540	0	0	538.571	1.42857
9.6223	0	545	0	535	0	540	0	540	0	535	0	535	0	540	0	0	538.571	1.42857
9.6332	0	545	0	535	0	540	0	540	0	535	0	535	0	540	0	0	538.571	1.42857
9.6441	0	545	0	535	0	540	0	540	0	535	0	535	0	540	0	0	538.571	1.42857
9.6549	0	545	0	535	0	540	0	540	0	535	0	535	0	540	0	0	538.571	1.42857
9.6658	0	545	0	535	0	540	0	540	0	535	0	535	0	540	0	0	538.571	1.42857
9.6766	0	545	0	535	0	540	0	540	0	535	0	535	0	540	0	0	538.571	1.42857
9.6875	0	545	0	535	0	540	0	540	0	535	0	535	0	540	0	0	538.571	1.42857
9.6984	0	545	0	535	0	540	0	540	0	535	0	535	0	540	0	0	538.571	1.42857
9.7092	0	545	0	535	0	540	0	540	0	535	0	535	0	540	0	0	538.571	1.42857
9.7201	0	545	0	535	0	540	0	540	0	535	0	535	0	540	0	0	538.571	1.42857
9.731	0	545	0	535	0	540	0	540	0	535	0	535	0	540	0	0	538.571	1.42857
9.7418	0	545	0	535	0	540	0	540	0	535	0	535	0	540	0	0	538.571	1.42857
9.7527	0	545	0	535	0	540	0	540	0	535	0	535	0	540	0	0	538.571	1.42857
9.7635	0	545	0	535	0	540	0	540	0	535	0	535	0	540	0	0	538.571	1.42857
9.7744	0	545	0	535	0	540	0	540	0	535	0	535	0	540	0	0	538.571	1.42857
9.7853	0	545	0	535	0	540	0	540	0	535	0	535	0	540	0	0	538.571	1.42857
9.7961	0	545	0	535	0	540	0	540	0	535	0	535	0	540	0	0	538.571	1.42857
9.807	0	545	0	535	0	540	0	540	0	535	0	535	0	540	0	0	538.571	1.42857
9.8178	0	545	0	535	0	540	0	540	0	535	0	535	0	540	0	0	538.571	1.42857
9.8287	0	545	0	535	0	540	0	540	0	535	0	535	0	540	0	0	538.571	1.42857
9.8396	0	545	0	535	0	540	0	540	0	535	0	535	0	540	0	0	538.571	1.42857
9.8504	0	545	0	535	0	540	0	540	0	535	0	535	0	540	0	0	538.571	1.42857
9.8613	0	545	0	535	0	540	0	540	0	535	0	535	0	540	0	0	538.571	1.42857
9.8721	0	545	0	535	0	540	0	540	0	535	0	535	0	540	0	0	538.571	1.42857
9.883	0	545	0	535	0	540	0	540	0	535	0	535	0	540	0	0	538.571	1.42857
9.8939	0	545	0	535	0	540	0	540	0	535	0	535	0	540	0	0	538.571	1.42857
9.9047	0	545	0	535	0	540	0	540	0	535	0	535	0	540	0	0	538.571	1.42857
9.9156	0	545	0	535	0	540	0	540	0	535	0	535	0	540	0	0	538.571	1.42857
9.9264	0	545	0	535	0	540	0	540	0	535	0	535	0	540	0	0	538.571	1.42857
9.9373	0	545	0	535	0	540	0	540	0	535	0	535	0	540	0	0	538.571	1.42857
9.9482	0	545	0	535	0	540	0	540	0	535	0	535	0	540	0	0	538.571	1.42857
9.959	0	545	0	535	0	540	0	540	0	535	0	535	0	540	0	0	538.571	1.42857
9.9699	0	545	0	535	0	540	0	540	0	535	0	535	0	540	0	0	538.571	1.42857
9.9807	0	545	0	535	0	540	0	540	0	535	0	535	0	540	0	0	538.571	1.42857
9.9916	0	545	0	535	0	540	0	540	0	535	0	535	0	540	0	0	538.571	1.42857
10.0025	0	545	0	535	0	540	0	540	0	535	0	535	0	540	0	0	538.571	1.42857
10.0133	0	545	0	535	0	540	0	540	0	535	0	535	0	540	0	0	538.571	1.42857
10.0242	0	545	0	535	0	540	0	540	0	535	0	535	0	540	0	0	538.571	1.42857
10.035	0	545	0	535	0	540	0	540	0	535	0	535	0	540	0	0	538.571	1.42857
10.0459	0	545	0	535	0	540	0	540	0	535	0	535	0	540	0	0	538.571	1.42857
10.0568	0	545	0	535	0	540	0	540	0	535	0	535	0	540	0	0	538.571	1.42857
10.0676	0	545	0	535	0	540	0	540	0	535	0	535	0	540	0	0	538.571	1.42857
10.0785	0	545	0	535	0	540	0	540	0	535	0	535	0	540	0	0	538.571	1.42857
10.0893	0	545	0	535	0	540	0	540	0	535	0	535	0	540	0	0	538.571	1.42857
10.1002	0	545	0	535	0	540	0	540	0	535	0	535	0	540	0	0	538.571	1.42857
10.1111	0	545	0	535	0	540	0	540	0	535	0	535	0	540	0	0	538.571	1.42857
10.1219	0	545	0	535	0	540	0	540	0	535	0	535	0	540	0	0	538.571	1.42857
10.1328	0	545	0	535	0	540	0	540	0	535	0	535	0	540	0	0	538.571	1.42857
10.1436	0	545	0	535	0	540	0	540	0	535	0	535	0	540	0	0	538.571	1.42857
10.1545	0	545	0	535	0	540	0	540	0	535	0	535	0	540	0	0	538.571	1.42857
10.1654	0	545	0	535	0	540	0	540	0	535	0	535	0	540	0	0	538.571	1.42857
10.1762	0	545	0	535	0	540	0	540	0	535	0	535	0	540	0	0	538.571	1.42857
10.1871	0	545	0	535	0	540	0	540	0	535	0	535	0	540	0	0	538.571	1.42857
10.1979	0	545	0	535	0	540	0	540	0	535	0	535	0	540	0	0	538.571	1.42857
10.2088	0	545	0	535	0	540	0	540	0	535	0	535	0	540	0	0	538.571	1.42857
10.2197	0	545	0	535	0	540	0	540	0	535	0	535	0	540	0	0	538.571	1.42857
10.2305	0	545	0	535	0	540	0	540	0	535	0	535	0	540	0	0	538.571	1.42857
10.2414	0	545	0	535	0	540	0	540	0	535	0	535	0	540	0	0	538.571	1.42857
10.2523	0	545	0	535	0	540	0	540	0	535	0	535	0	540	0	0	538.571	1.42857
10.2631	0	545	0	535	0	540	0	540	0	535	0	535	0	540	0	0	538.571	1.42857
10.274	0	545	0	535	0	540	0	540	0	535	0	535	0	540	0	0	538.571	1.42857
[truncated: 1,574 more rows]

## Sheet: Figure 4F
0 → -5	-5 → 5
0.2969	0.3518
0.33	0.2529
0.2419	0.3189
[truncated: 11 more rows]

## Sheet: Figure 4G
0 → -5	-5 → 5
[truncated: 7 more rows]
