# Supplementary material for: All-optical closed-loop voltage clamp for precise control of muscles and neurons in live animals
Source: Research Square preprint supplement (doi:10.21203/rs.3.rs-1505565/v1), 2023-03-29
Supplement: Supplementary file 12 [file a456430373af6596807e52fb.xlsx]

## Sheet: ED Figure 1D
Depolarisation	Time (s)					Mean DF/F0	SEM
	0.0142857	0.0877778	0.0866667	0.0325	0.1	0.0767361	0.0150515
	0.0285714	-0.382222	0.146667	0.0133333	-0.0766667	-0.0747222	0.112297
	0.0428571	0.0877778	-0.0333333	0.22	0.515	0.197361	0.11784
	0.0571428	-0.162222	-0.433333	0	0	-0.148889	0.102234
	0.0714286	-0.102222	-0.203333	0.175	0.345	0.0536111	0.125813
	0.0857143	-0.0622222	-0.553333	0.156667	0.503333	0.0111111	0.221255
	0.1	1.16778	0.546667	0.4475	1.165	0.831736	0.19427
	0.114286	2.81778	2.84667	4.134	2.324	3.03061	0.386857
	0.128571	4.25778	5.68667	8.995	2.85333	5.44819	1.31615
	Time (s)								Mean DF/F0	SEM
Hyperpolarisation:	0.0714286	-0.0488889	0.0655556	0.342222	0.245556	-0.147778	0.537778	-3.39	-0.342222	0.515646
	0.0857143	-0.548889	0.135556	0.112222	-0.304444	0.282222	0.407778	-2.79	-0.386508	0.420013
	0.1	-0.0188889	-0.0544444	0.122222	0.135556	-0.177778	0.397778	-3.06	-0.379365	0.452049
	0.114286	0.201111	-0.694444	-0.0777778	0.0355556	0.0122222	-0.332222	-3.73	-0.655079	0.524394
	0.128571	-0.218889	0.0855556	-0.327778	-0.354444	0.272222	-0.662222	-3.24	-0.635079	0.449213
	0.142857	0.0511111	0.425556	0.352222	-0.294444	-0.0177778	-0.442222	-3.92	-0.549365	0.574127
	0.157143	0.291111	-0.194444	0.162222	0.185556	-0.167778	-0.102222	-2.58	-0.343651	0.379587
	0.171429	-3.30889	-3.34444	-1.30778	-3.38444	-3.17778	-3.94222	-5.1	-3.36651	0.425792
	0.185714	-9.03889	-6.59444	-6.28778	-9.47444	-8.23778	-8.38222	-8.77	-8.11222	0.459501

## Sheet: ED Figure 1E
Time (s)										Fit parameter:	a	b	a	b	a	b
0	1.20206	1.24098	1.21122	1.03464	1.21592	1.15398	1.16723	1.12737		y = a · exp(-bx) + c	1st 20 s	1st 20 s	2nd 20 s	2nd 20 s	full dataset	full dataset
1	1.19782	1.23762	1.21907	1.03525	1.21993	1.1617	1.16631	1.13225			0.20217	0.0016	0.1607	0.00038807	0.21818	0.00106
2	1.17888	1.24448	1.20065	1.03487	1.20815	1.14923	1.16279	1.13076			0.26677	0.00123	1.73	0.00212	0.2805	0.00106
3	1.20018	1.24563	1.21996	1.03831	1.2045	1.14015	1.16252	1.12833			0.24739	0.0013	0.12204	0.00074522	0.25463	0.00118
4	1.19473	1.24006	1.22199	1.037	1.1979	1.15543	1.17129	1.13379			0.10278	0.00029462	-0.00062533	-0.00104	0.07647	0.00039984
5	1.19115	1.23838	1.22497	1.03475	1.20131	1.15065	1.16952	1.12835			0.2338	0.0013	0.41164	0.00106	0.23661	0.00111
6	1.20653	1.244	1.21321	1.03281	1.20492	1.1582	1.17441	1.11941			0.17631	0.00187	0.06962	0.00027527	0.1857	0.00119
7	1.19879	1.23448	1.21075	1.0351	1.19863	1.16172	1.1719	1.12334			0.16621	0.00196	0.075	0.00072752	0.1716	0.00144
8	1.19359	1.22475	1.20888	1.03736	1.19469	1.16203	1.16046	1.13397			0.13634	0.00187	0.76698	0.00164	0.14316	0.00132
9	1.18584	1.22273	1.21078	1.03646	1.20081	1.16617	1.15441	1.14324
10	1.19556	1.214	1.20633	1.03994	1.19281	1.17737	1.15817	1.13568				p-value
11	1.19802	1.22743	1.20822	1.03758	1.19206	1.18014	1.14725	1.13331		Parameter a	1st 20 s / 2nd 20 s	0.29777
12	1.201	1.22731	1.21381	1.0357	1.19533	1.18569	1.14626	1.13125			1st 20 s / full data set	1
13	1.18517	1.22635	1.2099	1.03485	1.19386	1.18542	1.13632	1.12511			2nd 20 s / full data set	0.63254
14	1.19315	1.22461	1.21328	1.03711	1.1835	1.19119	1.13088	1.12312		Parameter b	1st 20 s / 2nd 20 s	0.09717
15	1.18788	1.22246	1.2129	1.03696	1.1862	1.17313	1.12752	1.12231			1st 20 s / full data set	0.97414
16	1.18269	1.22628	1.20828	1.0352	1.18755	1.17678	1.1268	1.13007			2nd 20 s / full data set	0.86977
17	1.18421	1.22705	1.2087	1.03208	1.1906	1.1652	1.13281	1.13606
18	1.18562	1.22523	1.22429	1.03224	1.19394	1.1676	1.14278	1.13447
19	1.18905	1.21945	1.21531	1.03459	1.19256	1.16154	1.14552	1.13103
20	1.18269	1.21666	1.20573	1.0361	1.19526	1.15534	1.14565	1.11909
21	1.19097	1.21709	1.2045	1.02952	1.1991	1.15107	1.14771	1.11008
22	1.18169	1.222	1.2102	1.03893	1.20001	1.15568	1.15762	1.10554
23	1.18384	1.21671	1.1973	1.03761	1.19568	1.1554	1.15812	1.11142
24	1.17748	1.22219	1.20717	1.03647	1.19515	1.1502	1.16675	1.10891
25	1.17632	1.21796	1.20002	1.03486	1.18814	1.138	1.16221	1.113
26	1.17489	1.21598	1.20159	1.03748	1.19217	1.13298	1.15702	1.11571
27	1.18284	1.21844	1.20282	1.03768	1.2009	1.12669	1.15066	1.11174
28	1.1713	1.21577	1.19507	1.03225	1.19649	1.12417	1.1573	1.10693
29	1.17018	1.21487	1.19527	1.0331	1.19309	1.12075	1.15476	1.11013
30	1.16533	1.22149	1.2076	1.03476	1.18762	1.13431	1.16198	1.11106
31	1.16252	1.23505	1.20794	1.03378	1.18321	1.12575	1.15271	1.11592
32	1.17638	1.23107	1.19572	1.03033	1.17929	1.13359	1.16393	1.11887
33	1.17663	1.23605	1.19842	1.03431	1.16872	1.12855	1.16322	1.10922
34	1.17672	1.22267	1.20702	1.03458	1.17436	1.128	1.16185	1.10998
35	1.16735	1.22746	1.19571	1.03731	1.17547	1.11983	1.16768	1.11376
36	1.17268	1.21696	1.20383	1.04088	1.17604	1.11651	1.1546	1.11647
37	1.15768	1.21936	1.20086	1.04111	1.18053	1.12097	1.14568	1.12206
38	1.17854	1.21589	1.19333	1.03966	1.17526	1.12797	1.14063	1.12024
39	1.16766	1.21778	1.17918	1.04425	1.17293	1.13403	1.13534	1.1233
40	1.17577	1.21455	1.19055	1.03602	1.16368	1.13929	1.1308	1.12071
41	1.16774	1.20996	1.18799	1.0356	1.15877	1.15091	1.13466	1.1113
42	1.16419	1.2011	1.1995	1.03348	1.15009	1.15121	1.13259	1.11241
43	1.161	1.21266	1.18417	1.03287	1.15227	1.15322	1.14151	1.11369
44	1.161	1.20897	1.18344	1.03282	1.15931	1.16269	1.13356	1.11174
45	1.16556	1.20458	1.19435	1.02988	1.16012	1.16395	1.13905	1.10273
46	1.16394	1.21562	1.19677	1.03271	1.16013	1.16533	1.14072	1.10019
47	1.15867	1.21098	1.19505	1.03521	1.16215	1.17088	1.14373	1.10959
48	1.15459	1.20109	1.19188	1.0334	1.16197	1.16677	1.142	1.11371
49	1.16142	1.1981	1.19645	1.03738	1.16885	1.1642	1.14338	1.1125
50	1.16618	1.19888	1.18941	1.04201	1.16174	1.17388	1.13364	1.10049
51	1.15453	1.19691	1.1973	1.0432	1.16659	1.19064	1.12524	1.11097
52	1.15173	1.20902	1.18683	1.03895	1.16683	1.19886	1.12581	1.10983
53	1.15737	1.2167	1.18238	1.03687	1.16065	1.19108	1.13155	1.10518
54	1.16468	1.20555	1.18662	1.03622	1.15751	1.18995	1.14346	1.1059
55	1.16201	1.19504	1.1937	1.03592	1.16147	1.19505	1.12937	1.10848
56	1.16399	1.19623	1.19151	1.03556	1.16867	1.20877	1.14164	1.1027
57	1.17142	1.20295	1.19494	1.03874	1.16639	1.21716	1.13526	1.09539
58	1.15598	1.19935	1.1885	1.03951	1.17144	1.23229	1.13307	1.1077
59	1.16631	1.19375	1.18055	1.03629	1.17805	1.2307	1.13809	1.11109
60	1.1634	1.19281	1.18328	1.0349	1.18085	1.22455	1.13691	1.11092
61	1.16604	1.18006	1.18808	1.03548	1.17984	1.22693	1.14995	1.11908
62	1.1705	1.17717	1.19859	1.03543	1.1738	1.2166	1.1449	1.11696
63	1.17294	1.18797	1.17607	1.03431	1.17544	1.20367	1.13275	1.11128
64	1.16406	1.1922	1.18214	1.03317	1.17461	1.19497	1.1423	1.1186
65	1.16312	1.19002	1.18072	1.03126	1.17794	1.19215	1.15068	1.11843
66	1.16853	1.19006	1.18608	1.03676	1.17975	1.19136	1.15594	1.11887
67	1.16908	1.19885	1.17955	1.03898	1.18582	1.1894	1.16031	1.1201
68	1.16935	1.19613	1.18714	1.04024	1.18015	1.18461	1.16498	1.11158
69	1.16346	1.1989	1.18622	1.03422	1.17556	1.18047	1.16284	1.11222
70	1.16778	1.18974	1.18325	1.03352	1.18084	1.15631	1.15354	1.108
71	1.15564	1.18895	1.17952	1.03321	1.18517	1.1481	1.15428	1.10768
72	1.17133	1.19335	1.17613	1.03451	1.19675	1.13872	1.14589	1.10355
73	1.1613	1.1934	1.18807	1.03792	1.19604	1.1186	1.12699	1.09997
74	1.16134	1.19223	1.18225	1.03999	1.20256	1.11043	1.13182	1.10216
75	1.15446	1.18777	1.17592	1.03812	1.20184	1.10305	1.13766	1.10412
76	1.14547	1.19261	1.17632	1.03834	1.20144	1.10143	1.14342	1.10977
77	1.14457	1.1925	1.1813	1.04064	1.20416	1.09215	1.13113	1.10763
78	1.15638	1.19278	1.17817	1.03779	1.2041	1.07982	1.13678	1.10594
79	1.14345	1.187	1.19103	1.03509	1.20386	1.07977	1.12963	1.09903
80	1.1428	1.18622	1.16618	1.03323	1.18964	1.0711	1.10958	1.10243
81	1.15194	1.18472	1.18051	1.03507	1.19209	1.07169	1.10278	1.09996
82	1.14983	1.19197	1.17007	1.0287	1.18755	1.07477	1.10064	1.10425
83	1.15952	1.19385	1.17653	1.02956	1.18089	1.07448	1.10366	1.10016
84	1.14209	1.19121	1.18554	1.03588	1.17589	1.07461	1.10296	1.10461
85	1.14512	1.19416	1.17471	1.03695	1.17776	1.07497	1.10975	1.11049
86	1.14939	1.18738	1.16125	1.03725	1.18278	1.07209	1.11798	1.11493
87	1.13776	1.19533	1.16982	1.03509	1.17469	1.07224	1.12586	1.11083
88	1.15191	1.19185	1.17823	1.03523	1.16713	1.07438	1.11735	1.1166
89	1.15818	1.18326	1.17302	1.03363	1.16498	1.0773	1.12726	1.11318
90	1.14752	1.17631	1.1662	1.03242	1.15989	1.07719	1.12797	1.11392
91	1.15412	1.1813	1.18425	1.03666	1.16104	1.07459	1.13564	1.10905
92	1.14839	1.18249	1.16992	1.03057	1.16373	1.08335	1.13439	1.09859
93	1.14008	1.19696	1.16675	1.03048	1.15607	1.09532	1.14268	1.09356
94	1.14412	1.18466	1.16013	1.03257	1.15616	1.086	1.13654	1.09482
95	1.13633	1.18201	1.18023	1.03355	1.16007	1.07949	1.12111	1.09949
96	1.15447	1.18168	1.18557	1.03004	1.16457	1.08201	1.11426	1.10684
97	1.14605	1.18553	1.18952	1.03127	1.1612	1.08324	1.10728	1.10111
98	1.13504	1.17767	1.18178	1.03275	1.16248	1.08652	1.10328	1.09404
99	1.13927	1.18155	1.17541	1.02914	1.15978	1.0862	1.10128	1.09385
100	1.13669	1.18331	1.17492	1.02844	1.1609	1.09191	1.09852	1.09138
101	1.13844	1.17997	1.17652	1.0286	1.15371	1.09014	1.09993	1.09159
102	1.15593	1.18959	1.18331	1.02401	1.15587	1.10169	1.11065	1.09995
103	1.14173	1.1926	1.18132	1.0282	1.15475	1.10242	1.11283	1.10759
104	1.13691	1.19157	1.17055	1.03293	1.15445	1.10999	1.11101	1.09532
105	1.15558	1.18698	1.1662	1.0384	1.14917	1.10597	1.11917	1.09868
106	1.14533	1.18603	1.16798	1.03473	1.14643	1.10359	1.11609	1.09917
107	1.15913	1.18982	1.16003	1.03489	1.15219	1.10967	1.12597	1.10002
108	1.13874	1.18511	1.16947	1.03747	1.15537	1.11929	1.11935	1.09868
109	1.13665	1.18496	1.16417	1.02992	1.14884	1.11992	1.11938	1.08441
110	1.14653	1.18296	1.16397	1.032	1.14421	1.13289	1.11363	1.08793
111	1.1331	1.18843	1.15015	1.03064	1.14758	1.1439	1.10837	1.09319
112	1.13655	1.19277	1.15723	1.03418	1.13819	1.15399	1.10648	1.08529
113	1.13922	1.19128	1.15973	1.03471	1.14313	1.16295	1.11419	1.09002
114	1.12291	1.19384	1.16607	1.03296	1.13997	1.16474	1.11639	1.08729
115	1.14516	1.1962	1.15765	1.0339	1.14267	1.18069	1.11697	1.08835
116	1.13526	1.19918	1.15768	1.03628	1.14033	1.18111	1.12081	1.09173
117	1.13746	1.19961	1.15852	1.03154	1.14382	1.1887	1.11828	1.09584
118	1.13945	1.19013	1.15727	1.02891	1.15667	1.17647	1.10401	1.10478
119	1.13408	1.1788	1.14393	1.0307	1.15414	1.16904	1.11165	1.11771
120	1.14447	1.19325	1.16166	1.0316	1.15249	1.17619	1.10985	1.11087
121	1.13835	1.20047	1.15234	1.03579	1.15002	1.19117	1.12071	1.09832
122	1.13607	1.21321	1.15193	1.03397	1.16239	1.21043	1.11002	1.08802
123	1.13129	1.20424	1.15755	1.03636	1.16493	1.20027	1.11052	1.08569
124	1.14563	1.20587	1.15439	1.03518	1.15928	1.18135	1.11217	1.08719
125	1.13049	1.19892	1.1566	1.03359	1.15552	1.18812	1.12132	1.09394
126	1.12977	1.19196	1.14695	1.0322	1.15367	1.19966	1.12257	1.0933
127	1.12657	1.19455	1.16202	1.03186	1.14836	1.21164	1.12484	1.09729
128	1.13478	1.18743	1.15096	1.03142	1.14872	1.22478	1.11336	1.1002
129	1.13615	1.19124	1.15844	1.03296	1.14438	1.23246	1.10616	1.10946
130	1.12976	1.18736	1.15097	1.03607	1.14157	1.23947	1.11199	1.1084
131	1.12279	1.17714	1.15855	1.03609	1.14063	1.22976	1.11167	1.10433
132	1.12992	1.1776	1.15598	1.03052	1.15048	1.2253	1.10706	1.1008
133	1.14669	1.17581	1.15203	1.03562	1.15673	1.23471	1.09986	1.10326
134	1.13479	1.165	1.15523	1.02786	1.15005	1.24418	1.097	1.1073
135	1.14563	1.16782	1.14528	1.02623	1.15106	1.24067	1.10223	1.09977
136	1.13822	1.17351	1.16712	1.0313	1.14563	1.23766	1.10506	1.09611
137	1.13934	1.18079	1.15765	1.0315	1.14258	1.23844	1.10479	1.09246
138	1.13975	1.1826	1.16131	1.03495	1.14076	1.22928	1.10985	1.09897
139	1.15359	1.18255	1.15754	1.03823	1.14519	1.22125	1.10897	1.0922
140	1.13943	1.16605	1.15385	1.03426	1.14277	1.2063	1.12065	1.0903
141	1.13392	1.17571	1.15212	1.03685	1.14271	1.1905	1.11015	1.09367
142	1.12923	1.16848	1.15927	1.03167	1.14084	1.18291	1.10549	1.1007
143	1.12688	1.17664	1.14361	1.02939	1.14467	1.16459	1.10401	1.09462
144	1.12771	1.17609	1.14709	1.03024	1.13675	1.14593	1.10342	1.09538
145	1.12032	1.1714	1.15635	1.03336	1.14185	1.13293	1.10018	1.1063
146	1.13385	1.17433	1.15041	1.03584	1.14011	1.10876	1.10368	1.10698
147	1.13993	1.17405	1.14815	1.03387	1.13884	1.0912	1.10628	1.1054
148	1.12909	1.17239	1.14199	1.0359	1.13369	1.08754	1.10324	1.10311
149	1.14733	1.16651	1.14785	1.0365	1.12855	1.08504	1.10293	1.1058
150	1.14073	1.16678	1.15363	1.03444	1.12544	1.07781	1.11214	1.10624
151	1.13124	1.16014	1.1541	1.03169	1.13647	1.06189	1.11621	1.10167
152	1.13449	1.16169	1.15033	1.03277	1.13595	1.06146	1.11364	1.10288
153	1.13066	1.15951	1.15424	1.03156	1.13731	1.05439	1.10191	1.09416
154	1.14271	1.15133	1.15743	1.03281	1.14021	1.04878	1.08441	1.09882
155	1.13909	1.15148	1.14932	1.03192	1.14203	1.05083	1.0858	1.09218
156	1.12556	1.1498	1.15214	1.03269	1.13066	1.04825	1.07465	1.09053
157	1.13028	1.15712	1.1574	1.03419	1.13802	1.04883	1.07906	1.08434
158	1.13385	1.15246	1.15879	1.02987	1.13313	1.03712	1.0903	1.08714
159	1.12601	1.15353	1.14575	1.02993	1.13635	1.03704	1.09725	1.0871
160	1.13622	1.15349	1.15322	1.02859	1.14033	1.03805	1.1028	1.08763
161	1.1304	1.15528	1.15004	1.03431	1.14067	1.03518	1.11161	1.08211
162	1.12131	1.16082	1.14655	1.03434	1.14828	1.04187	1.10385	1.08675
163	1.13073	1.15793	1.15784	1.03517	1.14333	1.03777	1.10301	1.08149
164	1.13362	1.15156	1.14622	1.03407	1.14268	1.03951	1.10234	1.08355
165	1.12172	1.15141	1.14857	1.03603	1.14727	1.03194	1.10829	1.08672
166	1.12059	1.14823	1.12915	1.03198	1.15807	1.02882	1.1077	1.09528
167	1.11379	1.14945	1.14129	1.03206	1.15369	1.0274	1.10542	1.09582
168	1.11496	1.14868	1.14294	1.0315	1.1432	1.02679	1.08979	1.08127
169	1.13964	1.149	1.14479	1.03037	1.13796	1.02493	1.09633	1.07883
170	1.12808	1.15476	1.13965	1.02955	1.14674	1.03096	1.09704	1.08662
171	1.12658	1.15881	1.14017	1.02798	1.14263	1.0349	1.11035	1.07963
172	1.12101	1.15243	1.13138	1.03122	1.14766	1.03154	1.11963	1.08247
173	1.12858	1.15731	1.15292	1.02938	1.15188	1.03284	1.12039	1.08516
174	1.12164	1.15033	1.14515	1.02812	1.15047	1.03317	1.11313	1.08878
175	1.1229	1.15063	1.1463	1.0265	1.14566	1.03006	1.11101	1.09862
176	1.1213	1.1479	1.14001	1.02797	1.14038	1.02862	1.11771	1.08871
177	1.13012	1.15108	1.14033	1.03073	1.13812	1.03223	1.11824	1.08586
178	1.12391	1.15226	1.13299	1.03192	1.13938	1.02656	1.12595	1.07647
179	1.11721	1.15532	1.14191	1.03302	1.13573	1.02825	1.12631	1.07501
180	1.11803	1.15183	1.14289	1.03425	1.13788	1.03234	1.10789	1.08011
181	1.12466	1.15483	1.13685	1.03026	1.13885	1.03544	1.09365	1.07932
182	1.12485	1.15151	1.13496	1.02645	1.14321	1.02837	1.0969	1.07213
183	1.11672	1.14983	1.13293	1.03109	1.14461	1.0385	1.10297	1.06448
184	1.1253	1.14622	1.13515	1.02647	1.136	1.03605	1.10375	1.06848
185	1.12549	1.15161	1.14956	1.02416	1.12515	1.03889	1.10633	1.08264
186	1.12979	1.15409	1.1278	1.02513	1.11713	1.04173	1.11768	1.08074
187	1.12966	1.16038	1.13504	1.02049	1.11038	1.04653	1.10979	1.07695
188	1.13692	1.16353	1.14062	1.02436	1.10806	1.05528	1.11213	1.07206
189	1.11869	1.16774	1.14211	1.02569	1.10851	1.05699	1.10295	1.07135
190	1.11802	1.17068	1.14391	1.02506	1.10943	1.06156	1.09211	1.07615
191	1.11568	1.17597	1.14445	1.02671	1.11376	1.05642	1.10074	1.07794
192	1.12089	1.17101	1.12465	1.02696	1.10914	1.05443	1.09186	1.08112
193	1.116	1.1621	1.13739	1.02343	1.11293	1.05568	1.097	1.07961
194	1.10595	1.16391	1.12549	1.02312	1.10459	1.06088	1.10834	1.07217
195	1.11634	1.16343	1.15165	1.0275	1.11011	1.05889	1.0997	1.06854
196	1.1239	1.16351	1.12094	1.0329	1.10566	1.06835	1.10387	1.06444
197	1.1188	1.16892	1.13799	1.02769	1.10327	1.0769	1.09792	1.07555
198	1.11792	1.15022	1.13527	1.02964	1.09889	1.07877	1.08173	1.06996
199	1.11976	1.14271	1.13496	1.03158	1.09829	1.0837	1.08971	1.06836
200	1.13439	1.14187	1.13624	1.02398	1.09914	1.07865	1.08714	1.07485
201	1.11196	1.13109	1.13956	1.02653	1.1013	1.08931	1.08905	1.07214
202	1.11715	1.14326	1.14486	1.02388	1.10003	1.09722	1.09342	1.07301
203	1.11169	1.14178	1.13945	1.0284	1.09921	1.10299	1.09126	1.08238
204	1.11964	1.14351	1.14083	1.02705	1.09916	1.09941	1.08594	1.07878
205	1.11269	1.14453	1.14381	1.02274	1.09763	1.10079	1.07936	1.08196
206	1.11618	1.14451	1.13607	1.0297	1.09624	1.09767	1.07517	1.07432
207	1.10828	1.14046	1.13458	1.02761	1.09557	1.09761	1.07302	1.07716
208	1.11036	1.14097	1.13823	1.0315	1.10434	1.09812	1.08317	1.07699
209	1.11422	1.14341	1.12817	1.03105	1.11155	1.10586	1.09333	1.08052
210	1.12573	1.13742	1.13066	1.02797	1.10981	1.11718	1.09864	1.07929
211	1.12556	1.13956	1.14461	1.02967	1.10937	1.13407	1.08418	1.07739
212	1.11101	1.14108	1.14596	1.03296	1.10112	1.14696	1.08209	1.07292
213	1.10492	1.14024	1.13495	1.03139	1.10498	1.1538	1.07871	1.06782
214	1.11939	1.1395	1.13958	1.03147	1.10655	1.14142	1.07521	1.07775
215	1.11283	1.13891	1.13477	1.03497	1.10343	1.13966	1.07801	1.07081
216	1.11025	1.13855	1.12998	1.03277	1.10656	1.13614	1.08805	1.07969
217	1.11629	1.14045	1.13018	1.03083	1.11272	1.13622	1.08673	1.08099
218	1.11703	1.13795	1.13987	1.03581	1.11493	1.13273	1.08191	1.07763
219	1.11225	1.13159	1.14282	1.03045	1.11501	1.14555	1.08093	1.08575
220	1.11001	1.13049	1.12388	1.02805	1.12118	1.1543	1.08332	1.08761
221	1.12204	1.13328	1.13027	1.02824	1.1266	1.15289	1.08723	1.08037
222	1.11471	1.13674	1.13505	1.02896	1.12722	1.16242	1.0943	1.07998
223	1.11025	1.11979	1.12852	1.02599	1.13214	1.1479	1.09746	1.07651
224	1.11882	1.12254	1.12601	1.02951	1.13014	1.15436	1.10326	1.07888
225	1.10481	1.12322	1.13529	1.0319	1.12203	1.14754	1.09304	1.07223
226	1.1165	1.12846	1.12704	1.02796	1.11826	1.14998	1.08796	1.06805
227	1.10991	1.12898	1.11956	1.03164	1.11988	1.15209	1.0761	1.06184
228	1.11811	1.12928	1.12351	1.02764	1.11607	1.17085	1.07492	1.05462
229	1.11916	1.1243	1.12957	1.03078	1.10495	1.16038	1.06868	1.0644
230	1.11203	1.12457	1.1192	1.03066	1.10758	1.14108	1.06827	1.06818
231	1.11329	1.12827	1.13728	1.02939	1.11343	1.11582	1.07031	1.07531
232	1.1225	1.13399	1.13199	1.02801	1.11652	1.11871	1.07527	1.06629
233	1.11448	1.13537	1.12657	1.02516	1.11626	1.11558	1.07229	1.06454
234	1.11192	1.1305	1.12484	1.02688	1.11168	1.11347	1.08041	1.06885
235	1.11057	1.13037	1.11625	1.02901	1.11134	1.1003	1.0833	1.07498
236	1.1289	1.12914	1.12723	1.02608	1.11508	1.09442	1.07305	1.07756
237	1.10663	1.12531	1.12496	1.03011	1.11811	1.0936	1.07254	1.0789
238	1.12671	1.13744	1.11569	1.02902	1.11395	1.09998	1.06895	1.0857
239	1.10951	1.14018	1.11326	1.02882	1.11748	1.09534	1.06568	1.07918
240	1.09808	1.1449	1.13223	1.03303	1.11999	1.09472	1.05689	1.07393
241	1.10923	1.13978	1.12506	1.03188	1.1213	1.09101	1.06615	1.06815
242	1.11358	1.13823	1.1328	1.03258	1.11733	1.08913	1.07653	1.06653
243	1.11853	1.13937	1.12053	1.03422	1.11044	1.081	1.07787	1.06368
244	1.11543	1.13619	1.126	1.03121	1.10736	1.07239	1.07343	1.07006
245	1.11248	1.12402	1.11899	1.03127	1.10511	1.07716	1.06918	1.07488
246	1.11757	1.13127	1.12824	1.03258	1.10948	1.07464	1.06671	1.07463
247	1.1107	1.13611	1.12538	1.02993	1.10884	1.07186	1.06526	1.07737
248	1.11331	1.12946	1.12624	1.029	1.11186	1.07586	1.07834	1.07751
249	1.11122	1.13879	1.12501	1.02951	1.10852	1.06953	1.08418	1.07596
250	1.11898	1.12877	1.13316	1.02822	1.11258	1.07504	1.06806	1.06984
251	1.11609	1.13033	1.12958	1.03121	1.11091	1.06641	1.06706	1.07679
252	1.11252	1.13264	1.12158	1.0279	1.11239	1.06329	1.07767	1.07519
253	1.10854	1.12961	1.12433	1.02647	1.1074	1.05972	1.0832	1.07263
254	1.11481	1.13965	1.1381	1.02894	1.11928	1.06259	1.0835	1.07541
255	1.11276	1.13769	1.12565	1.03073	1.12655	1.06101	1.09583	1.07856
256	1.1236	1.12991	1.13987	1.02579	1.12859	1.06044	1.0949	1.07281
257	1.12261	1.12639	1.12307	1.02292	1.11958	1.05835	1.09368	1.07412
258	1.11954	1.13041	1.12959	1.02333	1.12197	1.06531	1.09546	1.07689
259	1.12659	1.12879	1.12185	1.02098	1.12508	1.06755	1.09718	1.07641
260	1.11634	1.13292	1.11529	1.02723	1.12793	1.06338	1.09365	1.07503
261	1.10636	1.13424	1.12367	1.0275	1.13172	1.06928	1.08716	1.08159
262	1.12465	1.13679	1.13421	1.02376	1.12959	1.06653	1.07287	1.08172
263	1.12614	1.13405	1.11646	1.02797	1.12847	1.07048	1.08025	1.08365
264	1.11786	1.13082	1.12394	1.02948	1.13454	1.07036	1.07295	1.07457
265	1.09392	1.13458	1.12237	1.03439	1.13652	1.06941	1.08587	1.0788
266	1.09688	1.13478	1.11664	1.03651	1.14559	1.06651	1.08171	1.07238
267	1.11012	1.12954	1.11872	1.03389	1.15043	1.06542	1.08975	1.07195
268	1.11664	1.12867	1.1271	1.03511	1.14246	1.06786	1.08573	1.0635
269	1.1033	1.13503	1.14064	1.02993	1.14086	1.0648	1.06744	1.06169
270	1.08794	1.12751	1.11956	1.02466	1.12992	1.07809	1.05511	1.05856
271	1.10441	1.12933	1.12085	1.02319	1.12784	1.09444	1.06076	1.05965
272	1.10158	1.12715	1.13017	1.0241	1.13567	1.10044	1.06928	1.06831
273	1.10317	1.13313	1.12008	1.02358	1.12683	1.10748	1.07391	1.07273
274	1.10434	1.13858	1.13277	1.02829	1.11706	1.08952	1.0645	1.06723
275	1.11511	1.14099	1.11867	1.02823	1.11778	1.08624	1.06871	1.05831
276	1.10123	1.13555	1.11764	1.02426	1.12299	1.08455	1.07476	1.06112
277	1.09596	1.12809	1.11939	1.02658	1.1218	1.08572	1.06489	1.05938
278	1.10132	1.1314	1.1126	1.02585	1.12594	1.0779	1.05715	1.05765
279	1.10429	1.12755	1.13842	1.02846	1.12754	1.08162	1.05459	1.06332
280	1.11128	1.124	1.11778	1.02859	1.13958	1.08282	1.05779	1.06964
281	1.10502	1.13365	1.12322	1.02906	1.13931	1.08523	1.0677	1.05847
282	1.12256	1.13191	1.11426	1.02887	1.13567	1.09279	1.08231	1.05574
283	1.10807	1.12149	1.12565	1.02741	1.12808	1.08933	1.09513	1.0556
284	1.114	1.11835	1.11151	1.02863	1.11901	1.09311	1.08551	1.06144
285	1.11726	1.11688	1.11986	1.02761	1.11161	1.09525	1.07844	1.06185
286	1.1124	1.12972	1.10992	1.03353	1.10934	1.10998	1.0787	1.06765
287	1.10053	1.12728	1.10855	1.03335	1.10739	1.11496	1.08261	1.07231
288	1.11294	1.12939	1.10762	1.03	1.10656	1.11651	1.08132	1.06844
289	1.10779	1.13372	1.11217	1.02675	1.10837	1.13004	1.08954	1.0693
290	1.11878	1.13647	1.11907	1.02611	1.09148	1.14132	1.08071	1.06918
291	1.10315	1.13241	1.11149	1.02829	1.09077	1.14983	1.07586	1.0666
292	1.0998	1.12789	1.11155	1.03256	1.10297	1.13892	1.08527	1.06802
293	1.10964	1.13442	1.12343	1.03496	1.11123	1.15158	1.0872	1.07346
294	1.11627	1.13721	1.10622	1.03449	1.11245	1.16881	1.08691	1.06926
295	1.09953	1.1411	1.10114	1.03573	1.11031	1.17986	1.08372	1.06441
296	1.10191	1.13282	1.11939	1.03092	1.10868	1.19208	1.07506	1.06061
297	1.10424	1.13301	1.12541	1.02855	1.10967	1.19032	1.07669	1.0602
298	1.11774	1.13092	1.12231	1.02859	1.11057	1.18598	1.08134	1.0699
299	1.1023	1.12837	1.12688	1.02919	1.11293	1.19484	1.07501	1.06722
300	1.1103	1.12556	1.11576	1.02932	1.1086	1.20152	1.07863	1.06885
301	1.0903	1.12632	1.11377	1.02953	1.09915	1.20402	1.07393	1.06834
302	1.0937	1.12715	1.11746	1.03357	1.09577	1.19934	1.08551	1.06407
303	1.08507	1.121	1.1169	1.02943	1.09626	1.17156	1.09245	1.06531
304	1.09585	1.12431	1.12168	1.02617	1.10717	1.15665	1.08858	1.0609
305	1.10729	1.12886	1.11387	1.02501	1.11408	1.14794	1.09105	1.06256
306	1.09709	1.12313	1.12303	1.02124	1.11679	1.13269	1.07421	1.0585
307	1.09213	1.13008	1.11925	1.02262	1.11594	1.13444	1.07128	1.06001
308	1.10899	1.13566	1.11711	1.02218	1.11695	1.13294	1.07042	1.05918
309	1.10276	1.12975	1.11236	1.02723	1.12126	1.13135	1.06827	1.0607
310	1.09747	1.1227	1.12255	1.02992	1.12956	1.13227	1.07061	1.06412
311	1.09656	1.12126	1.11664	1.02715	1.13185	1.12469	1.08096	1.06759
312	1.10836	1.11091	1.12183	1.03029	1.11776	1.12118	1.08443	1.07136
313	1.09966	1.1123	1.11859	1.02624	1.1159	1.11648	1.08523	1.07224
314	1.10232	1.10896	1.11036	1.02946	1.11538	1.11015	1.0812	1.06683
315	1.09851	1.10917	1.10991	1.0242	1.11597	1.11009	1.08298	1.0559
316	1.09746	1.11053	1.10843	1.0255	1.11569	1.11237	1.07371	1.05802
317	1.10846	1.11983	1.11588	1.02691	1.10282	1.10957	1.07059	1.05423
318	1.10778	1.11767	1.11507	1.0238	1.10309	1.11513	1.07488	1.05354
319	1.10434	1.11604	1.10808	1.02524	1.1028	1.10538	1.073	1.04761
320	1.1049	1.12169	1.12788	1.02813	1.10309	1.09644	1.07082	1.04937
321	1.09648	1.13423	1.12301	1.018	1.10462	1.08896	1.06776	1.05438
322	1.10328	1.12659	1.11898	1.0201	1.11214	1.07486	1.07919	1.06308
323	1.10337	1.13255	1.11629	1.02632	1.11591	1.06812	1.08407	1.06913
324	1.10171	1.12274	1.10965	1.02804	1.1205	1.06175	1.07133	1.06651
325	1.0998	1.12018	1.11725	1.03303	1.12501	1.05947	1.06414	1.07198
326	1.08705	1.12328	1.11434	1.03598	1.12758	1.0675	1.07009	1.06483
327	1.09589	1.12567	1.11244	1.03561	1.13341	1.06774	1.06746	1.05853
328	1.08964	1.11884	1.10861	1.031	1.14022	1.06009	1.05353	1.05348
329	1.0889	1.1219	1.09892	1.03219	1.14793	1.05601	1.0572	1.05535
330	1.08314	1.11736	1.11212	1.02959	1.15252	1.05606	1.06189	1.06003
331	1.08793	1.11571	1.11329	1.02421	1.14927	1.06238	1.06705	1.05948
332	1.09591	1.10823	1.11124	1.02832	1.1339	1.05727	1.06088	1.05929
333	1.08955	1.11014	1.10078	1.03271	1.13269	1.03703	1.06497	1.0711
334	1.08766	1.10298	1.11544	1.0295	1.11686	1.03409	1.06573	1.06797
335	1.08793	1.10893	1.10829	1.02899	1.11838	1.04889	1.05744	1.06495
336	1.08485	1.11157	1.09783	1.02542	1.11773	1.05559	1.0568	1.05912
337	1.0925	1.11996	1.11456	1.02019	1.11454	1.03876	1.06338	1.06009
338	1.08895	1.1166	1.11596	1.02451	1.11492	1.03272	1.05682	1.05734
339	1.09098	1.11212	1.12249	1.02007	1.11972	1.04227	1.05929	1.05917
340	1.09292	1.10891	1.10282	1.02398	1.11614	1.04102	1.06657	1.05304
341	1.09865	1.11081	1.11059	1.0299	1.11923	1.04712	1.0673	1.05659
342	1.0909	1.10373	1.11585	1.02757	1.11433	1.04485	1.07505	1.05613
343	1.08696	1.10654	1.1108	1.03003	1.11532	1.04437	1.07232	1.06041
344	1.08186	1.11158	1.10471	1.03441	1.10764	1.05152	1.06561	1.05315
345	1.09583	1.11598	1.10861	1.03019	1.09911	1.05719	1.06665	1.06169
346	1.09356	1.09951	1.12101	1.02287	1.09941	1.06816	1.07232	1.05869
347	1.09005	1.0977	1.09626	1.01939	1.10552	1.08024	1.05907	1.06296
348	1.09396	1.10957	1.10368	1.02175	1.10025	1.08426	1.05331	1.0601
349	1.09796	1.10511	1.11119	1.02245	1.10121	1.08092	1.05844	1.05475
350	1.0956	1.10207	1.10846	1.02423	1.09884	1.08984	1.05988	1.05433
351	1.09257	1.10176	1.09838	1.02756	1.09731	1.09755	1.06053	1.05425
352	1.09357	1.11197	1.10807	1.03096	1.09031	1.10418	1.04778	1.04764
353	1.0844	1.10679	1.10262	1.03136	1.09775	1.10124	1.03752	1.05178
354	1.07422	1.10316	1.09891	1.03265	1.09448	1.11784	1.0438	1.05376
355	1.09193	1.10025	1.11026	1.0294	1.09666	1.1233	1.04393	1.05439
356	1.08793	1.10592	1.10062	1.02912	1.09738	1.12124	1.03884	1.04646
357	1.08012	1.10493	1.0977	1.03278	1.09894	1.10822	1.03841	1.04137
358	1.0856	1.11315	1.10889	1.03369	1.09747	1.08685	1.03677	1.04238
359	1.08059	1.11394	1.10781	1.0238	1.09549	1.07278	1.05073	1.04478
360	1.07556	1.11489	1.11121	1.03062	1.09558	1.05772	1.05556	1.04729
361	1.09347	1.12035	1.10736	1.02632	1.08932	1.0543	1.06269	1.04973
362	1.07281	1.12124	1.10511	1.02542	1.08925	1.06498	1.05235	1.05745
363	1.08893	1.12794	1.09667	1.01894	1.08279	1.07442	1.05485	1.06589
364	1.0718	1.12301	1.09841	1.02272	1.07955	1.07973	1.05606	1.05339
365	1.0833	1.12134	1.11514	1.02365	1.07529	1.07145	1.05211	1.04646
366	1.08465	1.11481	1.10832	1.02518	1.07973	1.06766	1.04877	1.04878
367	1.08431	1.1099	1.11803	1.01934	1.08319	1.07359	1.04366	1.05913
368	1.06839	1.11659	1.10925	1.0221	1.08483	1.08108	1.04548	1.05284
369	1.0754	1.12475	1.11645	1.02342	1.08334	1.08935	1.0433	1.05522
370	1.07122	1.12493	1.11204	1.02529	1.08929	1.08981	1.03529	1.06188
371	1.07373	1.1122	1.10294	1.02314	1.0853	1.07222	1.04681	1.0603
372	1.07623	1.11836	1.10832	1.02522	1.09208	1.05798	1.04827	1.06078
373	1.08791	1.11626	1.10385	1.02409	1.09551	1.06063	1.04623	1.05165
374	1.0838	1.11869	1.11666	1.02537	1.09935	1.05729	1.05287	1.05499
375	1.0897	1.1084	1.10919	1.0233	1.09877	1.03485	1.05732	1.05123
376	1.08703	1.1108	1.09862	1.02044	1.1027	1.02591	1.06256	1.0526
377	1.07092	1.11927	1.0964	1.02366	1.09589	1.03333	1.06452	1.05019
378	1.0847	1.11859	1.10825	1.02361	1.09227	1.04007	1.05471	1.04819
379	1.07603	1.11722	1.10135	1.02258	1.09308	1.04339	1.04559	1.0402
380	1.07755	1.10828	1.09635	1.02675	1.08799	1.05467	1.05049	1.03995
381	1.08626	1.11566	1.0978	1.02558	1.09851	1.05405	1.05025	1.04452
382	1.09068	1.11834	1.0991	1.02444	1.10085	1.05589	1.06019	1.04508
383	1.08864	1.11742	1.1054	1.0211	1.09417	1.05423	1.05993	1.04506
384	1.09002	1.12277	1.10669	1.01936	1.10021	1.05929	1.04981	1.04227
385	1.08596	1.12226	1.10379	1.02034	1.10021	1.06312	1.05357	1.04968
386	1.09318	1.11544	1.10153	1.02072	1.08534	1.06279	1.05447	1.05306
387	1.0855	1.11304	1.10153	1.02463	1.08143	1.06342	1.04704	1.04361
388	1.07501	1.11573	1.10205	1.02804	1.08447	1.06968	1.04995	1.04231
389	1.08083	1.11177	1.08653	1.02932	1.09099	1.06005	1.0543	1.03967
390	1.08202	1.10151	1.10824	1.02544	1.08523	1.06107	1.04926	1.04518
391	1.08512	1.10985	1.08491	1.03042	1.08801	1.07371	1.05144	1.05032
392	1.08399	1.11187	1.09815	1.02798	1.08206	1.07481	1.05529	1.04918
393	1.07238	1.11182	1.10182	1.0269	1.08246	1.08169	1.05293	1.05098
394	1.09697	1.11336	1.09063	1.03302	1.08078	1.0788	1.06363	1.05752
395	1.07836	1.11031	1.09044	1.02728	1.08031	1.0658	1.07039	1.0669
396	1.09029	1.10802	1.10421	1.03378	1.08272	1.0671	1.07441	1.07283
397	1.09239	1.09992	1.11138	1.02935	1.08137	1.07373	1.08376	1.06713
398	1.07126	1.10432	1.09947	1.03306	1.08482	1.07738	1.08503	1.05695
399	1.08657	1.1053	1.09444	1.02819	1.09932	1.0838	1.08038	1.04975
400	1.08534	1.10134	1.07934	1.02813	1.09558	1.09451	1.08212	1.05517
401	1.07228	1.10419	1.07718	1.02878	1.09499	1.10043	1.08047	1.04869
402	1.06456	1.09928	1.09684	1.02575	1.09303	1.10198	1.0736	1.04343
403	1.07919	1.10388	1.09263	1.02911	1.08548	1.10393	1.07787	1.04636
404	1.078	1.10637	1.10352	1.02978	1.08217	1.11366	1.06326	1.04194
405	1.0862	1.10748	1.08919	1.03078	1.08833	1.12006	1.05861	1.0422
406	1.08728	1.1105	1.08307	1.02795	1.08196	1.13266	1.05058	1.04441
407	1.0742	1.11157	1.08951	1.02882	1.09076	1.13877	1.04872	1.03538
408	1.06639	1.1136	1.09288	1.02768	1.09415	1.13358	1.04408	1.04198
409	1.08647	1.12417	1.10612	1.02577	1.09447	1.12658	1.04504	1.04829
410	1.07683	1.12721	1.10436	1.02842	1.09636	1.12403	1.03934	1.05569
411	1.07714	1.12843	1.09885	1.0298	1.09115	1.12417	1.05191	1.04535
412	1.08153	1.12311	1.11005	1.02735	1.0907	1.13257	1.05972	1.04528
413	1.08534	1.12734	1.1053	1.02836	1.08904	1.11954	1.0737	1.04145
414	1.08974	1.13555	1.09094	1.02796	1.08871	1.10866	1.07572	1.05581
415	1.06961	1.12496	1.10011	1.02718	1.09293	1.10121	1.08205	1.06347
416	1.08538	1.12965	1.09817	1.02643	1.08864	1.09526	1.08178	1.0629
417	1.07565	1.12892	1.09342	1.02571	1.08617	1.09295	1.07405	1.05337
418	1.08316	1.11692	1.10317	1.02551	1.08308	1.09142	1.06455	1.0516
419	1.07459	1.11852	1.10702	1.02476	1.08014	1.09948	1.05884	1.04462
420	1.07795	1.1124	1.10946	1.03117	1.0733	1.09973	1.05587	1.04437
421	1.06477	1.11115	1.105	1.03293	1.07637	1.08884	1.05329	1.04052
422	1.07253	1.11574	1.09282	1.03297	1.07495	1.07156	1.04438	1.03355
423	1.07235	1.11487	1.09952	1.03046	1.07504	1.06262	1.03649	1.04194
424	1.07886	1.10641	1.09956	1.02701	1.07742	1.06019	1.03446	1.04763
425	1.06181	1.10227	1.0848	1.0214	1.07959	1.06111	1.03084	1.04266
426	1.0725	1.10416	1.10405	1.02759	1.08162	1.06237	1.03832	1.04183
427	1.07715	1.10023	1.09523	1.02728	1.07744	1.04934	1.04478	1.04102
428	1.07473	1.1062	1.1015	1.02122	1.07509	1.05122	1.04135	1.03627
429	1.08357	1.11179	1.10289	1.02678	1.07321	1.04673	1.04452	1.04144
430	1.08089	1.10856	1.09623	1.02571	1.08105	1.0382	1.04786	1.03878
431	1.07511	1.10573	1.10772	1.02616	1.08857	1.02756	1.05002	1.03324
432	1.07164	1.10347	1.10053	1.0299	1.09267	1.02483	1.05108	1.03583
433	1.0739	1.10254	1.09994	1.02935	1.0977	1.01991	1.06043	1.033
434	1.07345	1.09631	1.09071	1.02817	1.09204	1.03267	1.06095	1.02904
435	1.07336	1.1011	1.10046	1.02955	1.0997	1.02776	1.06096	1.03783
436	1.07997	1.094	1.10375	1.02175	1.10794	1.02038	1.05727	1.03243
437	1.06836	1.09264	1.09462	1.02042	1.10672	1.02633	1.04626	1.03425
438	1.07451	1.09895	1.09436	1.0249	1.10919	1.01859	1.04014	1.0473
439	1.07484	1.09528	1.10311	1.02752	1.10184	1.03174	1.03897	1.04216
440	1.0765	1.10055	1.09534	1.03073	1.09808	1.02748	1.04996	1.0362
441	1.07676	1.09396	1.102	1.02801	1.09902	1.02484	1.05788	1.04111
442	1.07905	1.09298	1.08946	1.02626	1.09936	1.02502	1.05923	1.04194
443	1.07698	1.09211	1.09631	1.02681	1.09855	1.02259	1.05719	1.05151
444	1.0704	1.09133	1.0905	1.02565	1.09437	1.01883	1.05522	1.049
445	1.07986	1.09201	1.1088	1.02638	1.09675	1.01817	1.05316	1.04589
446	1.07085	1.08853	1.10012	1.02708	1.09887	1.02216	1.05825	1.04161
447	1.07739	1.09262	1.0924	1.02287	1.10087	1.02299	1.06361	1.03387
448	1.07393	1.1032	1.09268	1.02162	1.10438	1.02212	1.05438	1.03232
449	1.07603	1.09657	1.09043	1.02433	1.09829	1.01963	1.04126	1.03838
450	1.06399	1.09399	1.09149	1.02384	1.092	1.02355	1.04499	1.03397
451	1.06903	1.09333	1.11562	1.02305	1.094	1.0217	1.06023	1.03041
452	1.06721	1.08382	1.08953	1.02515	1.08975	1.01385	1.06191	1.04098
453	1.07078	1.08615	1.09684	1.02732	1.09141	1.01194	1.06453	1.04761
454	1.0832	1.09097	1.08283	1.02672	1.09549	1.00865	1.06614	1.0437
455	1.07061	1.08785	1.09881	1.02667	1.1007	1.00594	1.05251	1.04007
456	1.07411	1.09532	1.10151	1.02562	1.09416	1.01335	1.05244	1.04846
457	1.06413	1.09175	1.08311	1.02847	1.08692	1.02903	1.04747	1.03971
458	1.06741	1.09445	1.08975	1.02723	1.08244	1.04497	1.04611	1.03837
459	1.06189	1.09587	1.08202	1.02355	1.07753	1.05461	1.03818	1.03341
460	1.0699	1.09898	1.09539	1.02437	1.08893	1.05338	1.03131	1.034
461	1.07101	1.10054	1.08096	1.01918	1.08693	1.05729	1.03242	1.04269
462	1.07424	1.09753	1.08162	1.01801	1.08556	1.05496	1.0263	1.04105
463	1.07615	1.0924	1.09356	1.02078	1.09309	1.05202	1.02477	1.03731
464	1.07487	1.09843	1.08848	1.01871	1.09142	1.06387	1.02461	1.03157
465	1.07263	1.09968	1.0717	1.02148	1.08952	1.06326	1.03459	1.02977
466	1.07274	1.09198	1.09023	1.02078	1.08527	1.08458	1.04269	1.03254
467	1.07312	1.09119	1.08277	1.02001	1.07826	1.0873	1.047	1.02739
468	1.06883	1.0916	1.08755	1.02268	1.07724	1.08724	1.03206	1.02788
469	1.07033	1.10082	1.09227	1.02401	1.0778	1.0828	1.02845	1.02899
470	1.07691	1.09119	1.09162	1.02165	1.07964	1.07333	1.03318	1.0198
471	1.0684	1.09345	1.08675	1.02588	1.08459	1.06195	1.03008	1.02037
472	1.07089	1.09509	1.08673	1.02248	1.0773	1.06017	1.03488	1.00992
473	1.06644	1.0929	1.07724	1.02627	1.07543	1.04978	1.03719	1.02158
474	1.06916	1.09607	1.0759	1.0241	1.07269	1.05417	1.04453	1.02474
475	1.06929	1.10099	1.09135	1.02747	1.06419	1.0543	1.04824	1.0295
476	1.07571	1.09897	1.07944	1.02768	1.07183	1.05601	1.04392	1.02913
477	1.07077	1.09785	1.08881	1.02598	1.0668	1.06206	1.05	1.03547
478	1.06841	1.09162	1.09317	1.02522	1.06841	1.05423	1.0428	1.04195
479	1.06491	1.09492	1.09856	1.02265	1.06914	1.05543	1.03489	1.04428
480	1.06085	1.09885	1.09733	1.02664	1.06894	1.05441	1.0299	1.0393
481	1.06552	1.09404	1.08011	1.02322	1.05931	1.0637	1.03597	1.03881
482	1.07081	1.08998	1.09262	1.0237	1.05476	1.07202	1.04427	1.03122
483	1.06636	1.0955	1.08564	1.02382	1.05882	1.07689	1.04254	1.02809
484	1.07152	1.09532	1.08622	1.02325	1.05761	1.07849	1.033	1.02881
485	1.06008	1.09585	1.08739	1.02152	1.05376	1.06704	1.02954	1.02915
486	1.06651	1.09224	1.08103	1.02333	1.05442	1.06898	1.04177	1.02888
487	1.0604	1.09137	1.08054	1.02568	1.05287	1.06747	1.04662	1.0353
488	1.06647	1.09171	1.09197	1.02375	1.05589	1.06719	1.05025	1.03594
489	1.05291	1.08396	1.07772	1.02905	1.05617	1.06971	1.05341	1.03506
490	1.0593	1.08836	1.0759	1.02601	1.04737	1.06483	1.06004	1.04179
491	1.05912	1.09559	1.07973	1.02572	1.04846	1.066	1.06325	1.05123
492	1.06347	1.09069	1.07535	1.02909	1.06206	1.04601	1.07051	1.05759
493	1.06804	1.09629	1.07801	1.02726	1.06196	1.04269	1.06483	1.04974
494	1.06323	1.10405	1.07671	1.02763	1.06976	1.04162	1.06533	1.0504
495	1.06972	1.08983	1.07345	1.02574	1.06752	1.03141	1.06609	1.04682
496	1.062	1.08734	1.08661	1.02287	1.0659	1.01904	1.05141	1.04984
497	1.05783	1.08981	1.08005	1.02059	1.06588	1.01835	1.05069	1.0463
498	1.06492	1.08382	1.07743	1.02203	1.0687	1.01241	1.04316	1.04567
499	1.06057	1.0821	1.08576	1.02392	1.05997	1.02468	1.04231	1.04963
500	1.0467	1.07971	1.07357	1.02123	1.06096	1.02885	1.05155	1.04181
501	1.06001	1.07742	1.07547	1.0221	1.07035	1.0276	1.04604	1.04147
502	1.05893	1.07732	1.10358	1.02846	1.06554	1.02634	1.06236	1.04057
503	1.05097	1.08314	1.08244	1.02404	1.07299	1.02947	1.07207	1.04467
504	1.06198	1.08844	1.08121	1.02312	1.07283	1.0241	1.08158	1.04598
505	1.06276	1.0815	1.08297	1.02405	1.06952	1.02615	1.07001	1.04573
506	1.07055	1.08798	1.08669	1.023	1.07398	1.02364	1.0549	1.0466
507	1.0641	1.09552	1.08464	1.02095	1.08469	1.02415	1.04225	1.04804
508	1.05486	1.09199	1.0943	1.02139	1.08444	1.03201	1.04808	1.04959
509	1.06291	1.08873	1.08374	1.01717	1.09746	1.02897	1.05199	1.04629
510	1.06049	1.08557	1.07582	1.01558	1.09597	1.02693	1.04591	1.04029
511	1.0778	1.08436	1.08311	1.02124	1.0889	1.01582	1.04679	1.04716
512	1.07067	1.08081	1.0666	1.01852	1.08766	1.02083	1.05091	1.04224
513	1.05631	1.09515	1.07522	1.01933	1.08391	1.02292	1.04737	1.03981
514	1.05421	1.09849	1.05931	1.0241	1.08497	1.02066	1.04825	1.03883
515	1.06741	1.09253	1.08008	1.02603	1.07524	1.01018	1.03623	1.03673
516	1.06053	1.08323	1.07464	1.01997	1.07669	1.01142	1.04276	1.04238
517	1.04655	1.0749	1.07217	1.01986	1.08575	1.01512	1.04	1.04091
518	1.06193	1.07475	1.0655	1.02564	1.08099	1.02071	1.03977	1.04675
519	1.05496	1.08357	1.072	1.02662	1.07709	1.0161	1.03845	1.04621
520	1.06039	1.08251	1.06259	1.02597	1.07921	1.01023	1.02096	1.04403
521	1.04694	1.08352	1.07359	1.02774	1.07533	1.01797	1.02664	1.03931
522	1.06418	1.07463	1.07689	1.02661	1.07068	1.01791	1.02396	1.03786
523	1.06073	1.07509	1.07328	1.02574	1.07052	1.02797	1.02806	1.03609
524	1.06402	1.07595	1.08152	1.02137	1.06547	1.0326	1.03331	1.03017
525	1.06189	1.07616	1.07445	1.02164	1.05768	1.04415	1.04061	1.03153
526	1.05937	1.07368	1.07992	1.0201	1.05851	1.03623	1.04137	1.03133
527	1.05723	1.06991	1.08067	1.02156	1.06195	1.03762	1.04012	1.03431
528	1.05407	1.07931	1.08315	1.02164	1.06858	1.03899	1.03862	1.03414
529	1.06171	1.07538	1.07671	1.02331	1.06362	1.02996	1.03338	1.03564
530	1.04895	1.06515	1.06857	1.02439	1.06511	1.02215	1.04529	1.03742
531	1.04173	1.0748	1.09526	1.02319	1.06389	1.01965	1.04579	1.04063
532	1.04461	1.07473	1.07762	1.02329	1.07355	1.01219	1.0467	1.03827
533	1.05279	1.07747	1.0944	1.02373	1.10813	1.01501	1.04145	1.03426
534	1.05034	1.08226	1.0778	1.02074	1.10042	1.01654	1.03604	1.03274
535	1.05406	1.08593	1.07301	1.01952	1.10114	1.01203	1.04064	1.02993
536	1.05606	1.09004	1.07523	1.02253	1.09657	1.0121	1.04159	1.02627
537	1.05494	1.09236	1.0896	1.02267	1.08651	1.01661	1.04432	1.02862
538	1.05653	1.08979	1.08878	1.02191	1.07534	1.01109	1.04257	1.02717
539	1.05446	1.08907	1.07781	1.02584	1.07557	1.00464	1.04535	1.02691
540	1.05935	1.091	1.08022	1.02229	1.06848	1.00733	1.05291	1.02397
541	1.07157	1.09025	1.08845	1.01816	1.07333	1.00457	1.06507	1.02434
542	1.06968	1.08761	1.07891	1.02053	1.07259	1.01023	1.06234	1.02532
543	1.06281	1.09181	1.08723	1.01935	1.0745	1.00202	1.06371	1.02424
544	1.05103	1.0851	1.08027	1.02296	1.06548	1.00671	1.0596	1.03421
545	1.05595	1.09124	1.08191	1.02369	1.06706	1.00807	1.05428	1.02948
546	1.07434	1.08599	1.07272	1.02691	1.06497	1.01416	1.05467	1.04351
547	1.05596	1.08325	1.07742	1.02481	1.05496	1.02959	1.0448	1.04076
548	1.06993	1.08905	1.08156	1.02509	1.05844	1.03523	1.05214	1.04273
549	1.06092	1.08931	1.07397	1.01998	1.05766	1.03683	1.04862	1.03933
550	1.06713	1.09063	1.08853	1.01532	1.05441	1.04224	1.04943	1.03783
551	1.0587	1.08841	1.0638	1.01961	1.05545	1.049	1.06044	1.04248
552	1.05674	1.09115	1.07339	1.01804	1.04894	1.05205	1.05075	1.03648
553	1.05986	1.09265	1.07286	1.02392	1.0491	1.0442	1.04392	1.04537
554	1.06494	1.09007	1.06948	1.02556	1.05515	1.0496	1.04086	1.04691
555	1.05655	1.09205	1.0787	1.02225	1.06161	1.05571	1.04281	1.03976
556	1.06364	1.08394	1.0683	1.02504	1.05866	1.0488	1.04454	1.03289
557	1.06774	1.08762	1.08124	1.02477	1.05582	1.0469	1.04068	1.02697
558	1.06429	1.07902	1.0743	1.02177	1.05547	1.0417	1.02861	1.01833
559	1.0516	1.08005	1.07017	1.0188	1.05747	1.04303	1.03412	1.02942
560	1.06385	1.08433	1.06502	1.01622	1.06283	1.03454	1.03232	1.02858
561	1.05633	1.0771	1.06857	1.02063	1.07622	1.03434	1.03824	1.04372
562	1.06324	1.07485	1.06889	1.02182	1.06938	1.04696	1.03308	1.04879
563	1.05918	1.07407	1.0579	1.01989	1.06646	1.05758	1.02633	1.04286
564	1.04855	1.08236	1.07278	1.01938	1.05956	1.05273	1.03319	1.03192
565	1.06908	1.08359	1.05882	1.02005	1.05369	1.0489	1.04491	1.02641
566	1.05756	1.07837	1.05665	1.01735	1.05895	1.05195	1.05429	1.02849
567	1.05821	1.08161	1.06466	1.02175	1.05681	1.05005	1.04582	1.03937
568	1.05489	1.08619	1.06423	1.02584	1.06032	1.04206	1.04357	1.03163
569	1.05849	1.08964	1.04365	1.02841	1.05677	1.04838	1.04435	1.02632
570	1.05	1.08052	1.05923	1.02485	1.06465	1.05866	1.04562	1.02688
571	1.06314	1.07489	1.06084	1.02554	1.06456	1.06027	1.04654	1.02368
572	1.05883	1.07599	1.05625	1.02874	1.06436	1.04921	1.03745	1.02618
573	1.05459	1.07585	1.05334	1.02526	1.05891	1.0514	1.04494	1.03087
574	1.06914	1.07031	1.06018	1.0252	1.05713	1.06261	1.04777	1.02642
575	1.05585	1.06489	1.06141	1.02747	1.06788	1.05806	1.04163	1.02561
576	1.06274	1.06523	1.05591	1.02504	1.06803	1.06348	1.03017	1.0276
577	1.06076	1.06629	1.05782	1.02261	1.07403	1.06295	1.02464	1.02664
578	1.05407	1.07455	1.05084	1.02268	1.07627	1.07256	1.0222	1.02861
579	1.06724	1.07648	1.07328	1.02875	1.07177	1.08241	1.02954	1.02766
580	1.04781	1.06979	1.07045	1.0277	1.06951	1.08097	1.03164	1.02532
581	1.05619	1.0752	1.07187	1.02305	1.06853	1.07993	1.02821	1.03461
582	1.06647	1.08489	1.06269	1.02359	1.06867	1.07611	1.02837	1.04305
583	1.06425	1.08534	1.07292	1.02649	1.06154	1.06639	1.036	1.03631
584	1.06113	1.08611	1.06226	1.02904	1.06122	1.05763	1.04322	1.03236
585	1.05519	1.08352	1.05678	1.0297	1.06037	1.0463	1.02428	1.04023
586	1.05881	1.07994	1.06553	1.02806	1.05894	1.03177	1.02972	1.03871
587	1.04965	1.07917	1.06403	1.02378	1.05791	1.03288	1.02678	1.03554
588	1.05596	1.07921	1.06373	1.02561	1.0587	1.04086	1.03241	1.03155
589	1.05504	1.07671	1.06086	1.0263	1.05639	1.03611	1.04272	1.03465
590	1.04442	1.08065	1.0665	1.02902	1.0589	1.02432	1.044	1.04492
591	1.04514	1.08564	1.06546	1.02987	1.05777	1.0206	1.04023	1.04556
592	1.04713	1.07625	1.06385	1.02671	1.05999	1.02288	1.04482	1.04441
593	1.05044	1.07855	1.07003	1.02957	1.05915	1.02247	1.0461	1.05562
594	1.05717	1.08425	1.07331	1.02788	1.05387	1.01752	1.04019	1.04391
595	1.05545	1.08508	1.05608	1.02439	1.05512	1.0189	1.03673	1.03859
596	1.0471	1.08875	1.06113	1.01792	1.05122	1.02127	1.03703	1.03744
597	1.05345	1.08813	1.06767	1.02242	1.04976	1.01288	1.03562	1.03075
598	1.0602	1.084	1.05041	1.01989	1.05078	1.00926	1.03899	1.027
599	1.05184	1.08634	1.06102	1.0241	1.05424	1.00473	1.04485	1.03008
600	1.05625	1.0847	1.07482	1.02031	1.0654	1.00501	1.03636	1.03065
601	1.05269	1.07165	1.05467	1.01892	1.06116	1.01274	1.03516	1.03032
602	1.05675	1.06997	1.06366	1.02205	1.06606	1.02051	1.02888	1.03143
603	1.05708	1.07597	1.06679	1.02009	1.05747	1.02653	1.02593	1.03179
604	1.0561	1.06808	1.06462	1.02177	1.05421	1.02438	1.02794	1.02399
605	1.05158	1.06854	1.06215	1.02245	1.05182	1.02547	1.03017	1.02678
606	1.05262	1.07014	1.0656	1.02423	1.05156	1.02633	1.02674	1.0282
607	1.05434	1.06925	1.0494	1.02541	1.05609	1.01979	1.02292	1.02302
608	1.04893	1.06452	1.07624	1.02574	1.05297	1.00089	1.02567	1.02884
609	1.04889	1.0629	1.07289	1.02221	1.04982	0.992129	1.02654	1.02921
610	1.04535	1.06242	1.05793	1.02468	1.04966	0.996451	1.02594	1.02868
611	1.03979	1.05865	1.04769	1.02086	1.05666	1.00596	1.0236	1.03362
612	1.04803	1.06457	1.07259	1.02009	1.06299	1.00826	1.02772	1.03863
613	1.04673	1.05616	1.06236	1.02228	1.05885	1.00695	1.02007	1.03351
614	1.05278	1.06149	1.08071	1.01973	1.05218	1.01405	1.02312	1.03144
615	1.04499	1.06433	1.07672	1.01734	1.05639	1.01643	1.02163	1.02906
616	1.05778	1.06687	1.06026	1.02208	1.05944	1.01484	1.02909	1.025
617	1.04181	1.0688	1.06071	1.01966	1.0515	1.02425	1.02831	1.02812
618	1.04908	1.06408	1.0715	1.02363	1.05383	1.02163	1.02893	1.02732
619	1.0595	1.06578	1.05625	1.02452	1.05846	1.01358	1.03119	1.01725
620	1.05357	1.066	1.07049	1.01507	1.0487	1.00121	1.04228	1.02448
621	1.05065	1.06224	1.05899	1.01875	1.04853	1.00317	1.04954	1.02704
622	1.04119	1.05632	1.06217	1.02264	1.06074	1.008	1.04253	1.03386
623	1.07116	1.05141	1.07151	1.0187	1.06726	1.00246	1.03838	1.03351
624	1.0516	1.05703	1.0634	1.02282	1.0669	0.999383	1.04363	1.03111
625	1.05029	1.05173	1.05851	1.02112	1.06644	0.995246	1.04563	1.02907
626	1.04652	1.05163	1.07177	1.02606	1.06696	0.989645	1.0436	1.03566
627	1.05472	1.05246	1.06402	1.02409	1.06303	0.986089	1.0559	1.03299
628	1.0506	1.058	1.0527	1.02271	1.07037	0.985297	1.05619	1.02775
629	1.05533	1.05575	1.05454	1.02452	1.06889	0.987731	1.05703	1.02662
630	1.0506	1.05457	1.06722	1.02478	1.06624	0.988823	1.06027	1.03317
631	1.04188	1.05834	1.06865	1.01827	1.07042	0.990851	1.04663	1.0265
632	1.05083	1.06493	1.06314	1.0206	1.06974	0.99194	1.0428	1.02514
633	1.0415	1.06451	1.06654	1.02139	1.06439	0.996781	1.04699	1.02458
634	1.04748	1.06507	1.05541	1.02035	1.06774	1.006	1.05346	1.03226
635	1.04871	1.06444	1.05445	1.01781	1.06935	0.993062	1.0484	1.0367
636	1.04878	1.06603	1.04958	1.01763	1.06848	0.990693	1.04005	1.02828
637	1.0531	1.05678	1.06399	1.0189	1.06548	0.98724	1.04421	1.02683
638	1.03554	1.05457	1.06056	1.0169	1.05936	0.988362	1.03856	1.0356
639	1.05344	1.05638	1.05162	1.0192	1.06118	0.995877	1.04043	1.03099
640	1.05766	1.061	1.04948	1.02056	1.05476	0.991843	1.03849	1.03328
641	1.04988	1.05727	1.0529	1.01895	1.0528	0.999093	1.04204	1.03501
642	1.04378	1.06239	1.05819	1.01882	1.04921	1.01113	1.03908	1.02788
643	1.04374	1.06505	1.05401	1.01705	1.04763	1.01471	1.02267	1.02801
644	1.0548	1.06666	1.0435	1.02433	1.04724	1.02375	1.02521	1.02945
645	1.06233	1.06472	1.04735	1.0245	1.04374	1.02588	1.024	1.02955
646	1.04984	1.06444	1.04443	1.02181	1.04833	1.01009	1.03233	1.0325
647	1.05792	1.0754	1.05211	1.01886	1.05401	1.01192	1.01981	1.04374
648	1.05093	1.06938	1.06098	1.01508	1.06197	1.01642	1.01991	1.04074
649	1.0473	1.06896	1.05732	1.01932	1.05888	1.01821	1.01591	1.03427
650	1.04272	1.07216	1.04909	1.02112	1.05189	1.01277	1.02075	1.03123
651	1.05374	1.06698	1.06235	1.01962	1.05211	1.00892	1.02475	1.03603
652	1.04405	1.067	1.05008	1.02169	1.0411	0.989647	1.01667	1.03675
653	1.05772	1.06252	1.05389	1.01882	1.04898	0.991179	1.00634	1.03336
654	1.05663	1.06451	1.06665	1.01517	1.0467	0.991312	1.01035	1.03049
655	1.045	1.06908	1.05449	1.01472	1.04359	0.993312	1.02498	1.03889
656	1.04264	1.07434	1.04926	1.01902	1.04386	1.00156	1.03069	1.02946
657	1.04586	1.07428	1.0547	1.01704	1.04278	0.995025	1.02956	1.02447
658	1.04207	1.07644	1.05268	1.02087	1.03721	1.00488	1.02945	1.02566
659	1.04396	1.07666	1.06173	1.01888	1.04424	1.01086	1.02605	1.02882
660	1.04216	1.07247	1.04362	1.02088	1.04529	1.01411	1.0248	1.03078
661	1.05121	1.07188	1.04618	1.02033	1.04572	1.00884	1.02086	1.03317
662	1.04803	1.07771	1.04795	1.01907	1.04214	1.01437	1.02095	1.0361
663	1.03873	1.07801	1.05331	1.02093	1.03513	1.02125	1.02451	1.04381
664	1.04199	1.0789	1.05206	1.02063	1.03853	1.02437	1.01982	1.03799
665	1.04853	1.07585	1.05611	1.01603	1.03857	1.02261	1.01788	1.03429
666	1.04524	1.07621	1.0437	1.01879	1.04751	1.03236	1.02776	1.03563
667	1.04845	1.07249	1.04848	1.01341	1.05267	1.03462	1.03213	1.03086
668	1.04667	1.07564	1.05688	1.01302	1.05565	1.03892	1.02918	1.03475
669	1.04638	1.06837	1.05812	1.01717	1.04925	1.03732	1.02425	1.03166
670	1.03949	1.07009	1.06863	1.01731	1.04117	1.05069	1.02565	1.03221
671	1.0486	1.067	1.06248	1.01448	1.04173	1.06446	1.02411	1.03162
672	1.0604	1.0642	1.06842	1.01858	1.04586	1.06416	1.02743	1.02793
673	1.04658	1.06766	1.04405	1.01053	1.04025	1.07041	1.03261	1.02335
674	1.04417	1.06574	1.05887	1.01494	1.04078	1.08089	1.02916	1.02194
675	1.04353	1.06829	1.04605	1.01478	1.04265	1.08968	1.01863	1.02619
676	1.04409	1.06138	1.06426	1.01684	1.04164	1.08054	1.01775	1.03094
677	1.04445	1.06214	1.05606	1.01852	1.04652	1.06571	1.02229	1.03066
678	1.03902	1.0597	1.07156	1.01938	1.0412	1.07232	1.04228	1.03201
679	1.04891	1.06246	1.05289	1.0227	1.04177	1.07102	1.04478	1.03391
680	1.04242	1.06616	1.05672	1.02228	1.03973	1.08308	1.03757	1.02743
681	1.04537	1.06025	1.05673	1.02102	1.0427	1.08661	1.03097	1.02855
682	1.04338	1.06263	1.05672	1.01967	1.0477	1.09616	1.0435	1.02372
683	1.04206	1.06365	1.06179	1.01575	1.04675	1.09602	1.04661	1.02023
684	1.05012	1.06216	1.05728	1.0146	1.0483	1.09004	1.04964	1.02726
685	1.0419	1.06344	1.05217	1.01193	1.05104	1.09453	1.05308	1.03312
686	1.05473	1.05994	1.05256	1.01868	1.04936	1.10238	1.05554	1.03688
687	1.05658	1.05484	1.05329	1.01663	1.04788	1.08918	1.05915	1.04284
688	1.04832	1.056	1.05552	1.02149	1.05009	1.08869	1.03858	1.03788
689	1.04505	1.05503	1.05312	1.01835	1.05132	1.08168	1.03433	1.0221
690	1.05025	1.05752	1.06405	1.01878	1.04266	1.066	1.0193	1.01968
691	1.04088	1.04838	1.05473	1.01523	1.0391	1.06483	1.02194	1.02062
692	1.04039	1.047	1.0552	1.01091	1.03647	1.07265	1.01914	1.02082
693	1.04882	1.04644	1.05591	1.01288	1.04113	1.08168	1.02212	1.0232
694	1.05134	1.04452	1.03492	1.01077	1.04507	1.08137	1.02223	1.03131
695	1.04385	1.04924	1.04149	1.01277	1.05145	1.0834	1.0166	1.02812
696	1.04613	1.04377	1.0532	1.01331	1.05033	1.08616	1.01956	1.02807
697	1.03978	1.04945	1.05422	1.01256	1.0445	1.08815	1.02009	1.02037
698	1.03137	1.04743	1.05536	1.0128	1.04137	1.08768	1.02624	1.02223
699	1.04256	1.04465	1.04949	1.0148	1.04977	1.08007	1.02256	1.02189
700	1.03835	1.03393	1.04891	1.01269	1.05523	1.07053	1.02006	1.02097
701	1.03768	1.04035	1.05535	1.01793	1.05793	1.05711	1.02045	1.03222
702	1.05604	1.04394	1.04107	1.02019	1.06049	1.04222	1.03	1.06188
703	1.05439	1.04279	1.05321	1.01192	1.05406	1.03522	1.02833	1.0528
704	1.04412	1.03576	1.04316	1.01416	1.05246	1.0301	1.02571	1.04183
705	1.0494	1.0411	1.03865	1.01397	1.05466	1.02923	1.02843	1.03629
706	1.03212	1.05001	1.05103	1.01546	1.05443	1.03364	1.02829	1.02732
707	1.03817	1.05169	1.04251	1.01635	1.05463	1.03402	1.0212	1.02761
708	1.03425	1.05255	1.0506	1.01999	1.04867	1.03856	1.02103	1.01605
709	1.04036	1.05219	1.06208	1.01704	1.04781	1.02711	1.02473	1.01513
710	1.02904	1.04794	1.05488	1.01872	1.04309	1.03442	1.01912	1.02417
711	1.0343	1.04319	1.05187	1.01642	1.04493	1.04032	1.01454	1.02357
712	1.0394	1.04405	1.05816	1.0227	1.04303	1.04554	1.02079	1.02188
713	1.03219	1.0484	1.052	1.02055	1.03955	1.03304	1.02	1.01862
714	1.04037	1.0553	1.05851	1.02172	1.0406	1.02281	1.01285	1.02414
715	1.04561	1.0541	1.05643	1.0208	1.03799	1.01734	1.02585	1.02411
716	1.03142	1.06301	1.05415	1.01648	1.04513	1.01675	1.02593	1.02685
717	1.03415	1.07224	1.0603	1.01192	1.05053	1.0221	1.01764	1.03112
718	1.04578	1.0746	1.05942	1.00991	1.04676	1.02424	1.01689	1.03764
719	1.03954	1.06973	1.05251	1.01021	1.04137	1.02425	1.0101	1.0321
720	1.03676	1.06721	1.04931	1.01234	1.04027	1.03265	1.01625	1.02782
721	1.0376	1.06459	1.05356	1.01444	1.04182	1.02831	1.02789	1.0165
722	1.03445	1.06324	1.04423	1.01322	1.03627	1.01853	1.02938	1.01648
723	1.04309	1.06778	1.04012	1.0184	1.03712	1.01742	1.03328	1.0172
724	1.03742	1.06056	1.04371	1.01452	1.03828	1.02024	1.03099	1.0071
725	1.03603	1.05837	1.05483	1.01102	1.03024	1.02823	1.03611	1.01187
726	1.03882	1.06328	1.04753	1.01157	1.03774	1.02759	1.02932	1.01666
727	1.04292	1.06641	1.05145	1.01109	1.04489	1.03035	1.0307	1.02599
728	1.05371	1.06941	1.05618	1.01084	1.05195	1.02047	1.02856	1.0276
729	1.03736	1.07402	1.06186	1.01367	1.04824	1.01476	1.02515	1.0283
730	1.03287	1.07663	1.05052	1.0119	1.03926	1.014	1.02113	1.02752
731	1.0547	1.0783	1.05236	1.01374	1.04135	1.01517	1.01795	1.01735
732	1.05213	1.08553	1.05497	1.01881	1.04304	1.01565	1.03288	1.01046
733	1.0398	1.08325	1.05898	1.01442	1.05169	1.01444	1.02784	1.01321
734	1.0398	1.08913	1.04508	1.01607	1.0541	1.01159	1.03247	1.01198
735	1.03872	1.08546	1.04942	1.01249	1.03879	1.01235	1.03539	1.00998
736	1.03621	1.08276	1.05707	1.01326	1.04806	1.02122	1.02962	1.00782
737	1.03324	1.08471	1.04285	1.01416	1.05209	1.02023	1.02702	1.01185
738	1.0334	1.08846	1.0316	1.00837	1.04966	1.02244	1.02956	1.01666
739	1.05111	1.07795	1.04566	1.01366	1.05499	1.02833	1.03018	1.02209
740	1.03176	1.07233	1.05298	1.01299	1.05939	1.0277	1.02902	1.02348
741	1.04318	1.07412	1.03823	1.01342	1.05158	1.02484	1.03355	1.0218
742	1.03873	1.07829	1.03716	1.01687	1.05019	1.02193	1.02969	1.02091
743	1.04515	1.08226	1.03837	1.01258	1.05185	1.02644	1.02938	1.01833
744	1.03406	1.08168	1.03347	1.01192	1.05789	1.03308	1.03609	1.02234
745	1.03551	1.08493	1.04011	1.01116	1.06897	1.03742	1.03615	1.02727
746	1.04269	1.0804	1.04315	1.01292	1.07264	1.05082	1.03525	1.02673
747	1.02942	1.07661	1.03579	1.01689	1.06929	1.04218	1.04295	1.02496
748	1.04053	1.07542	1.04806	1.01871	1.06688	1.03225	1.03347	1.02092
749	1.0369	1.07882	1.04068	1.02215	1.06368	1.02376	1.03629	1.02356
750	1.03823	1.08225	1.04822	1.02109	1.06016	1.02255	1.0365	1.02328
751	1.03214	1.07358	1.05402	1.02011	1.05776	1.02338	1.03416	1.02227
752	1.04162	1.07829	1.04553	1.01857	1.05795	1.03066	1.02618	1.03075
753	1.03632	1.07844	1.04588	1.01532	1.06684	1.03827	1.03184	1.02656
754	1.03757	1.06998	1.05305	1.01622	1.06663	1.04533	1.03342	1.01714
755	1.03178	1.07335	1.04346	1.01197	1.06136	1.04221	1.01891	1.01602
756	1.03215	1.07465	1.04589	1.01352	1.05305	1.02327	1.01446	1.01151
757	1.03028	1.07069	1.04711	1.01	1.05808	1.01257	1.01647	1.01716
758	1.05208	1.07661	1.04554	1.01125	1.05632	1.00491	1.01764	1.01884
759	1.04086	1.08203	1.03917	1.01535	1.05574	1.01449	1.0136	1.00968
760	1.04916	1.08021	1.05214	1.01531	1.05442	1.02103	1.01733	1.01423
761	1.03373	1.08648	1.04521	1.01028	1.04733	1.02189	1.02041	1.00794
762	1.04793	1.085	1.03665	1.01285	1.04179	1.01472	1.02781	1.0107
763	1.04162	1.08982	1.0452	1.00991	1.0393	1.01689	1.02694	1.00861
764	1.04355	1.0853	1.05738	1.00959	1.04603	1.01081	1.01592	1.00859
765	1.04304	1.07341	1.03596	1.00692	1.04874	1.00842	1.02085	1.00849
766	1.02843	1.07613	1.04336	1.00761	1.04541	1.02103	1.02348	1.01643
767	1.03784	1.07332	1.04687	1.01105	1.04998	1.01512	1.03049	1.02335
768	1.03049	1.06996	1.04414	1.0118	1.03823	1.01696	1.03094	1.02165
769	1.032	1.06628	1.03221	1.0119	1.0283	1.01981	1.02968	1.02288
770	1.03124	1.06394	1.05018	1.01245	1.02916	1.02737	1.04061	1.02608
771	1.03668	1.06531	1.031	1.01508	1.03636	1.02487	1.03724	1.02855
772	1.0363	1.0611	1.03277	1.02167	1.04062	1.01927	1.03443	1.02548
773	1.03167	1.05659	1.03634	1.0171	1.03991	1.02646	1.01845	1.01979
774	1.03929	1.05695	1.0384	1.02208	1.03501	1.03514	1.0226	1.0246
775	1.02586	1.05603	1.04561	1.02543	1.03729	1.02703	1.02247	1.01957
776	1.03986	1.05683	1.04009	1.02203	1.04386	1.02046	1.02561	1.01887
777	1.03337	1.06009	1.03485	1.02456	1.0449	1.02996	1.01304	1.02138
778	1.03472	1.05999	1.03369	1.0204	1.04693	1.03161	1.00626	1.01945
779	1.03359	1.05242	1.03354	1.01911	1.04597	1.03057	1.01047	1.01863
780	1.0361	1.06585	1.04481	1.01936	1.06097	1.02261	1.01707	1.01646
781	1.03601	1.07587	1.03271	1.01352	1.05547	1.01182	1.01456	1.01059
782	1.03324	1.07404	1.0317	1.0187	1.04978	1.01364	1.01349	1.01849
783	1.02717	1.07857	1.02953	1.01761	1.04699	1.01926	1.02098	1.0246
784	1.02552	1.06832	1.03414	1.01395	1.04534	1.01671	1.02745	1.03498
785	1.02996	1.07215	1.02482	1.01255	1.05335	1.0319	1.02285	1.02942
786	1.03149	1.06042	1.02868	1.01359	1.05261	1.03004	1.02524	1.02392
787	1.02053	1.05395	1.02663	1.01586	1.04161	1.03226	1.04042	1.02428
788	1.02961	1.05192	1.03576	1.01537	1.04216	1.05177	1.03399	1.0251
789	1.03164	1.0468	1.02429	1.01701	1.04691	1.0663	1.03166	1.01797
790	1.04231	1.04625	1.03139	1.01884	1.0446	1.0742	1.0251	1.02096
791	1.03076	1.04711	1.02917	1.01242	1.04737	1.08211	1.02422	1.02035
792	1.02092	1.04251	1.0297	1.0168	1.04289	1.08501	1.01445	1.0204
793	1.03095	1.04051	1.02892	1.01347	1.04411	1.1	1.03033	1.02123
794	1.03325	1.04141	1.04255	1.01035	1.04291	1.08057	1.02358	1.01372
795	1.04036	1.0374	1.04354	1.01618	1.04474	1.06121	1.01274	1.0124
796	1.03514	1.03984	1.02652	1.01969	1.03837	1.04836	1.00975	1.01396
797	1.04098	1.04236	1.04343	1.01808	1.03894	1.0465	0.998743	1.01785
798	1.03051	1.04761	1.03505	1.01782	1.03648	1.05076	1.00149	1.01935
799	1.02638	1.05595	1.03335	1.01687	1.03165	1.06677	1.00801	1.01827
800	1.036	1.0503	1.02855	1.01471	1.03059	1.07445	1.00065	1.01638
801	1.02959	1.05176	1.0336	1.01438	1.03872	1.09132	1.00452	1.01847
802	1.03082	1.04948	1.03066	1.01502	1.04108	1.09477	1.00439	1.01225
803	1.03319	1.05259	1.03139	1.01551	1.04182	1.10664	1.01034	1.01614
804	1.03834	1.06303	1.03895	1.01165	1.04423	1.11285	1.00821	1.01309
805	1.04203	1.06129	1.03738	1.01368	1.04573	1.11969	1.00998	1.01477
806	1.02944	1.06313	1.03472	1.01173	1.03325	1.1189	1.01591	1.01015
807	1.02909	1.06209	1.04059	1.01228	1.03398	1.08572	1.02664	1.00683
808	1.03481	1.06327	1.0455	1.01549	1.02444	1.07232	1.03658	1.00612
809	1.02771	1.05819	1.02826	1.0149	1.01892	1.06361	1.03541	1.00396
810	1.03353	1.0542	1.03563	1.00905	1.0164	1.05226	1.03741	1.01329
811	1.03453	1.04802	1.04422	1.01048	1.01956	1.04536	1.03062	1.00665
812	1.04044	1.04989	1.0376	1.0138	1.02229	1.03796	1.02731	1.00864
813	1.02301	1.0506	1.04244	1.01453	1.02702	1.02261	1.0284	1.01283
814	1.03385	1.0528	1.03531	1.01299	1.02423	1.01899	1.02679	1.00898
815	1.02363	1.05219	1.03227	1.01199	1.02994	1.02066	1.02741	1.00904
816	1.02264	1.05086	1.03774	1.01251	1.03357	1.01463	1.04381	1.00948
817	1.02333	1.05606	1.03806	1.01389	1.03354	1.01599	1.04012	1.0133
818	1.01939	1.05235	1.03322	1.01474	1.02607	1.0152	1.03688	1.01199
819	1.02994	1.05876	1.03957	1.0174	1.02636	1.02206	1.04608	1.00405
820	1.0248	1.05651	1.04288	1.02209	1.02141	1.01732	1.04255	1.01405
821	1.03138	1.05644	1.03455	1.01723	1.02037	1.00986	1.03796	1.01068
822	1.0276	1.05496	1.03636	1.02083	1.02396	1.00225	1.04836	1.00503
823	1.03217	1.05589	1.04307	1.01624	1.03467	1.00298	1.05968	1.01197
824	1.03225	1.05802	1.02998	1.01927	1.03796	1.00095	1.05988	1.01193
825	1.02105	1.05428	1.02631	1.0156	1.03468	0.989324	1.06037	1.00946
826	1.02211	1.05781	1.03963	1.01596	1.03227	0.991554	1.0571	1.00565
827	1.02338	1.05886	1.03759	1.01663	1.02843	0.993001	1.0552	1.01453
828	1.0273	1.06001	1.03921	1.01497	1.03478	0.994479	1.05101	1.01825
829	1.02623	1.06821	1.03817	1.01485	1.02989	0.993722	1.03903	1.0197
830	1.02462	1.06485	1.03839	1.01418	1.03598	0.989164	1.03005	1.01484
831	1.0323	1.07344	1.04616	1.01342	1.03542	0.995726	1.02458	1.01336
832	1.02589	1.08351	1.04374	1.02113	1.04336	0.996648	1.01743	1.01647
833	1.0318	1.09139	1.03342	1.01978	1.03691	0.99459	1.01813	1.01063
834	1.02562	1.09661	1.04617	1.02245	1.03655	1.00284	1.02505	1.00812
835	1.03572	1.08958	1.03092	1.02217	1.03512	1.00476	1.03396	1.00154
836	1.03208	1.0817	1.04513	1.02156	1.03201	0.995641	1.0182	1.00709
837	1.03107	1.07456	1.04759	1.01786	1.02395	0.991867	1.01999	1.01753
838	1.04442	1.06352	1.02573	1.01315	1.02887	0.984989	1.01787	1.01368
839	1.04072	1.06134	1.04041	1.0141	1.03194	0.980547	1.01021	1.01371
840	1.03983	1.05594	1.0449	1.01565	1.03124	0.985228	1.0162	1.01521
841	1.03248	1.0523	1.04253	1.01348	1.03366	0.990855	1.01206	1.0111
842	1.02945	1.05541	1.0413	1.01259	1.03082	0.993692	0.999187	1.01373
843	1.03874	1.06034	1.04365	1.01395	1.02499	0.995982	0.999433	1.02047
844	1.02869	1.05228	1.03401	1.01649	1.02086	0.996268	0.994474	1.01883
845	1.03836	1.04562	1.04579	1.01488	1.02615	0.988632	1.00037	1.01308
846	1.02603	1.04598	1.03701	1.01461	1.02479	0.992804	1.00286	1.0146
847	1.03727	1.04612	1.03112	1.01473	1.02638	0.998366	1.0039	1.0111
848	1.03119	1.04707	1.03089	1.01806	1.02509	1.0012	1.00737	1.00944
849	1.02838	1.04224	1.03855	1.01879	1.02572	1.00539	1.01424	1.01198
850	1.01491	1.04726	1.03433	1.00948	1.01979	0.985823	1.01928	1.01366
851	1.03589	1.04807	1.04691	1.01395	1.01944	0.981688	1.00507	1.01197
852	1.03104	1.05174	1.03552	1.01747	1.02174	0.988531	1.00539	1.01586
853	1.0262	1.05289	1.03965	1.02014	1.0101	1.00349	0.998043	1.01752
854	1.02996	1.05401	1.03948	1.01963	1.01085	1.02155	0.995901	1.01304
855	1.04142	1.04847	1.04009	1.0169	1.01623	1.03274	1.00248	1.0142
856	1.02102	1.04573	1.03549	1.0138	1.01642	1.03678	0.991713	1.0151
857	1.02733	1.05275	1.03121	1.01346	1.02069	1.0321	0.990657	1.0137
858	1.03022	1.05036	1.03737	1.01807	1.02285	1.02119	0.992141	1.01205
859	1.03759	1.05457	1.03412	1.01331	1.03322	1.02764	1.00135	1.01285
860	1.03086	1.06302	1.03538	1.01759	1.03363	1.02783	1.0063	1.02231
861	1.02991	1.05938	1.02394	1.01547	1.02922	1.0278	1.00195	1.01606
862	1.04264	1.06396	1.02656	1.0172	1.02803	1.03226	1.01081	1.0189
863	1.02528	1.06744	1.0235	1.01065	1.0254	1.04403	0.998202	1.01935
864	1.03015	1.07203	1.03025	1.00802	1.02124	1.03939	1.00289	1.01193
865	1.02304	1.06823	1.0436	1.01081	1.02476	1.04183	1.00726	1.01401
866	1.02431	1.06427	1.04487	1.01549	1.01947	1.05667	1.00625	1.01983
867	1.03168	1.05569	1.02609	1.0158	1.0174	1.05896	1.00306	1.02277
868	1.03089	1.05289	1.03312	1.01441	1.02066	1.0451	0.997074	1.02317
869	1.0276	1.05014	1.0327	1.01772	1.0193	1.03071	1.00001	1.01739
870	1.01773	1.03731	1.03719	1.01585	1.01915	1.0261	1.00444	1.00813
871	1.03751	1.03583	1.04211	1.01815	1.01624	1.01601	1.00528	1.00815
872	1.02851	1.03436	1.0248	1.01849	1.01738	1.01075	0.995911	1.02256
873	1.02807	1.03266	1.03592	1.01851	1.01708	1.00978	0.997304	1.02313
874	1.02672	1.03654	1.03255	1.02044	1.01765	1.01459	0.996207	1.01706
875	1.03181	1.03944	1.03644	1.02054	1.0176	1.00665	1.00693	1.01534
876	1.01691	1.03849	1.02918	1.01986	1.02108	1.02325	1.00237	1.01178
877	1.03125	1.03363	1.03179	1.01486	1.02091	1.02146	1.00386	1.01023
878	1.02783	1.03696	1.02329	1.01574	1.01251	1.0308	1.00368	1.01828
879	1.03697	1.03266	1.0294	1.01289	1.02089	1.04532	0.994892	1.01544
880	1.0387	1.0296	1.0284	1.00977	1.02972	1.06158	1.00081	1.0146
881	1.03031	1.0271	1.01991	1.01436	1.03279	1.06888	1.0053	1.00859
882	1.02704	1.03003	1.0383	1.01379	1.02841	1.0757	1.00042	1.00881
883	1.0341	1.02813	1.02613	1.01426	1.03134	1.07131	1.00825	1.01495
884	1.02647	1.02511	1.0271	1.01367	1.04229	1.07434	1.00866	1.0104
885	1.0408	1.02277	1.03641	1.01568	1.04814	1.07817	1.02162	1.01166
886	1.03288	1.02892	1.03554	1.0218	1.05355	1.08804	1.02494	1.01215
887	1.02634	1.03058	1.02485	1.01844	1.05434	1.09618	1.02253	1.01221
888	1.03164	1.0322	1.029	1.02355	1.04684	1.10663	1.01844	1.00569
889	1.03104	1.03668	1.03518	1.01976	1.0467	1.11565	1.01802	1.00531
890	1.02344	1.03962	1.02552	1.01565	1.04779	1.11518	1.01924	1.00799
891	1.02765	1.03925	1.02556	1.01829	1.05077	1.12005	1.01564	1.00405
892	1.03098	1.03905	1.0344	1.01819	1.05329	1.13221	1.01913	1.00581
893	1.02729	1.03427	1.03218	1.01797	1.05316	1.1121	1.00621	1.0032
894	1.04516	1.0355	1.02847	1.01382	1.05106	1.09357	1.00502	1.0045
895	1.02715	1.03085	1.0375	1.01905	1.04529	1.0862	1.00132	1.00645
896	1.02315	1.02903	1.02326	1.01782	1.03983	1.07467	1.0062	1.00711
897	1.02754	1.03233	1.03325	1.01719	1.03462	1.05839	1.00136	1.0077
898	1.02321	1.02451	1.03311	1.01388	1.04285	1.05273	1.00818	1.00549
899	1.0346	1.02596	1.03339	1.01604	1.04189	1.04014	1.01252	1.00181
900	1.02518	1.02553	1.02802	1.01269	1.04051	1.04659	1.0064	1.0112
901	1.04359	1.02428	1.03489	1.01376	1.03728	1.03073	1.0104	1.01218
902	1.03692	1.02588	1.02191	1.01309	1.03727	1.03174	1.01302	1.00973
903	1.02131	1.02368	1.04234	1.01209	1.03018	1.02398	1.0102	1.00981
904	1.01811	1.02262	1.0231	1.01539	1.04362	1.00838	1.01804	1.01736
905	1.0289	1.02658	1.03592	1.01672	1.04912	1.00946	1.02025	1.01124
906	1.01952	1.03451	1.03511	1.01061	1.04296	1.01168	1.0199	1.01305
907	1.00835	1.03072	1.02958	1.01586	1.03223	1.00656	1.01994	1.0088
908	1.01442	1.03312	1.03089	1.01371	1.03054	0.998732	1.02227	1.01119
909	1.02946	1.03412	1.03323	1.01774	1.0294	0.998336	1.01622	1.0131
910	1.0069	1.03082	1.02129	1.01943	1.03835	0.998293	1.01138	1.00863
911	1.01845	1.03579	1.02897	1.0191	1.03638	0.993007	1.02074	1.00715
912	1.01998	1.03064	1.0304	1.01724	1.04153	0.998106	1.02806	1.01431
913	1.02045	1.02106	1.0344	1.02025	1.03647	0.991569	1.0356	1.01894
914	1.02499	1.02632	1.03256	1.01893	1.04279	0.983102	1.02408	1.01716
915	1.01686	1.02617	1.03221	1.01934	1.0382	0.982724	1.01544	1.01982
916	1.02897	1.02732	1.0255	1.0215	1.02979	0.983298	1.01663	1.02205
917	1.026	1.02223	1.02772	1.0217	1.03295	0.989707	1.01942	1.02118
918	1.02433	1.02711	1.03042	1.02082	1.03409	0.991076	1.01692	1.01209
919	1.0259	1.02909	1.02875	1.01912	1.03216	0.988763	1.00929	1.01712
920	1.01325	1.02895	1.02014	1.01938	1.02516	0.983143	0.995985	1.01758
921	1.02292	1.026	1.02526	1.01891	1.02642	0.982216	0.995705	1.0212
922	1.02567	1.02611	1.03086	1.01805	1.02445	0.983537	0.997425	1.02006
923	1.01672	1.02511	1.022	1.01526	1.02423	0.980162	1.01093	1.0048
924	1.0283	1.02498	1.03094	1.01938	1.02499	0.98601	1.02419	1.00507
925	1.02241	1.02033	1.02777	1.01728	1.02089	0.982534	1.02171	1.01137
926	1.03152	1.0154	1.02534	1.01698	1.02203	0.9872	1.01682	1.0135
927	1.01825	1.01773	1.02978	1.02096	1.01537	0.98514	0.997388	1.00979
928	1.01827	1.01841	1.02858	1.01535	1.01453	0.986143	1.00486	1.01282
929	1.00794	1.01591	1.03124	1.0123	1.0163	0.994793	1.01247	1.01628
930	1.01097	1.01716	1.02811	1.01844	1.02449	0.986892	1.00798	1.01107
931	1.00473	1.02224	1.02384	1.01354	1.03065	0.990659	1.00716	1.01185
932	1.02168	1.02427	1.01569	1.0162	1.02477	0.988785	1.00224	1.01448
933	1.02931	1.01861	1.02772	1.01899	1.01888	0.993271	1.00083	1.01416
934	1.02551	1.01609	1.02909	1.02108	1.01825	0.995178	1.00123	1.0104
935	1.02736	1.01785	1.0342	1.0182	1.01772	0.984617	1.00977	1.00581
936	1.01928	1.01938	1.02875	1.01667	1.01713	0.992808	1.00646	1.00684
937	1.0237	1.01515	1.03087	1.01424	1.02066	0.995408	1.00279	1.01284
938	1.01469	1.0228	1.02856	1.01494	1.01769	0.994437	1.00817	1.01244
939	1.01805	1.02512	1.03374	1.0142	1.01267	0.990046	1.00378	1.0093
940	1.01507	1.02337	1.03429	1.01339	1.02232	0.989347	1.01535	1.01195
941	1.02195	1.01996	1.01369	1.01368	1.02005	1.00264	1.02048	1.00954
942	1.01375	1.0235	1.03937	1.01011	1.01954	0.996986	1.0162	1.01394
943	1.01235	1.02048	1.03482	1.01597	1.01596	0.987031	1.02229	1.01118
944	1.02068	1.01981	1.02453	1.01625	1.01845	0.995806	1.03004	1.01085
945	1.01416	1.02024	1.02671	1.01307	1.00871	0.991952	1.02054	1.0124
946	1.02298	1.02618	1.01718	1.01513	1.01377	0.986181	1.02253	1.01134
947	1.0203	1.0269	1.02874	1.01197	1.01915	0.988579	1.01974	1.01304
948	1.02158	1.0234	1.02357	1.0112	1.01705	0.988547	1.02585	1.00219
949	1.0214	1.02614	1.02132	1.00818	1.0171	0.989701	1.02444	1.00275
950	1.03437	1.02862	1.02587	1.0106	1.01318	0.999751	1.00984	1.00718
951	1.0136	1.02403	1.02725	1.01325	1.01924	0.995879	0.992931	1.00621
952	1.02402	1.02336	1.03165	1.01088	1.01736	0.981568	0.994543	1.00202
953	1.02404	1.02901	1.03888	1.01744	1.0176	0.988257	1.00284	1.01165
954	1.02359	1.02678	1.044	1.02048	1.01484	0.991131	1.00836	1.00706
955	1.0256	1.01958	1.03931	1.01298	1.01536	0.985943	1.00651	1.00654
956	1.00779	1.02401	1.03381	1.01327	1.0192	0.987858	1.00059	1.01
957	1.01378	1.0244	1.0373	1.00579	1.01465	0.991541	0.997214	1.01507
958	1.01527	1.02146	1.03423	1.0084	1.01751	1.00154	1.00242	1.02031
959	1.02959	1.02006	1.03098	1.00976	1.02016	1.00311	1.00047	1.02057
960	1.02276	1.02749	1.03485	1.00993	1.01831	1.01514	0.988651	1.0142
961	1.01729	1.02871	1.01675	1.01209	1.0217	1.01306	0.989962	1.01044
962	1.0084	1.02508	1.03244	1.0124	1.01326	1.00675	0.988932	1.00772
963	1.01307	1.03284	1.02637	1.01098	1.02796	0.993495	1.00014	1.0121
964	1.02817	1.02232	1.02524	1.00945	1.02676	0.99751	1.00255	1.00625
965	1.02155	1.02639	1.01289	1.01205	1.03138	0.997538	1.00569	1.0111
966	1.01764	1.02782	1.02955	1.01026	1.0342	0.989626	0.999665	1.01789
967	1.02387	1.03023	1.02013	1.01266	1.03416	0.990736	0.992384	1.01039
968	1.01534	1.02539	1.02889	1.01133	1.04316	0.997017	0.996672	1.01154
969	1.01795	1.02334	1.03026	1.01156	1.05301	1.00121	1.00224	1.01108
970	1.02258	1.02478	1.02233	1.01617	1.04915	1.00898	1.00688	1.02218
971	1.02069	1.02547	1.02718	1.00982	1.03939	1.01716	1.00354	1.01494
972	1.02076	1.03176	1.01921	1.00853	1.03783	1.02295	1.01817	1.0136
973	1.01736	1.03282	1.01746	1.00898	1.03482	1.02233	1.01961	1.01486
974	1.02517	1.02094	1.01916	1.01369	1.0339	1.01569	1.014	1.00893
975	1.02294	1.01878	1.02658	1.00971	1.03824	1.00071	1.01276	1.01107
976	1.02652	1.01683	1.01202	1.01228	1.0366	1.00694	1.01112	1.02149
977	1.03355	1.01619	1.01723	1.01737	1.03646	1.01975	1.01922	1.01155
978	1.02635	1.0187	1.01824	1.01295	1.0418	1.0153	1.02263	1.01628
979	1.01861	1.0113	1.02857	1.01081	1.03357	1.01669	1.02171	1.00928
980	1.01926	1.01779	1.02725	1.00763	1.02193	1.02245	1.02244	1.00804
981	1.01294	1.01764	1.01778	1.01154	1.02667	1.01564	1.02247	1.00895
982	1.02582	1.01611	1.02474	1.01545	1.02754	1.0203	1.01694	1.01148
983	1.01824	1.0206	1.01279	1.01791	1.02658	1.01601	1.01341	1.01389
984	1.0241	1.02567	1.02764	1.01709	1.02146	1.01582	1.02313	1.01861
985	1.01722	1.0333	1.01925	1.01784	1.02078	1.02815	1.02263	1.02325
986	1.02456	1.03527	1.02165	1.01786	1.01792	1.02958	1.01583	1.01164
987	1.01783	1.03942	1.02096	1.0161	1.02532	1.0224	1.022	1.01185
988	1.02694	1.03567	1.02652	1.01609	1.02214	1.03543	1.0274	1.01606
989	1.02838	1.04164	1.02081	1.01892	1.01586	1.04575	1.02347	1.01809
990	1.01969	1.04013	1.0295	1.01701	1.00777	1.06616	1.02266	1.01556
991	1.01334	1.03368	1.01798	1.01579	1.00387	1.06525	1.01685	1.02028
992	1.0169	1.03206	1.02129	1.01727	1.00218	1.06239	1.01919	1.02424
993	1.02592	1.02799	1.03654	1.01219	0.997574	1.06595	1.02734	1.01463
994	1.0266	1.02985	1.01623	1.01115	0.99539	1.07492	1.0349	1.01018
995	1.01999	1.02443	1.02079	1.01252	0.996856	1.08544	1.02444	1.01089
996	1.02097	1.02729	1.03985	1.00936	0.994879	1.09323	1.01367	1.01319
997	1.0253	1.02799	1.02261	1.01117	1.00671	1.09682	1.00583	1.011
998	1.01904	1.0236	1.0162	1.01181	1.00915	1.08924	0.99999	1.00779
999	1.00819	1.01779	1.02435	1.01224	1.01128	1.10442	0.993933	1.00439
1000	1.01428	1.02547	1.02888	1.0131	1.01419	1.08808	0.988641	1.01249
1001	1.02116	1.02272	1.01029	1.01028	1.0082	1.08709	0.989547	1.01417
1002	1.01742	1.0221	1.00581	1.00362	1.00485	1.0726	0.992115	1.01055
1003	1.02549	1.01957	1.01225	1.00806	1.01043	1.07472	0.990593	1.01024
1004	1.01435	1.0158	1.02415	0.999819	1.01912	1.0731	0.992503	1.00716
1005	1.019	1.02027	1.01793	1.00179	1.01932	1.06486	1.00178	1.00679
1006	1.0136	1.01878	1.02137	1.00405	1.02638	1.06198	0.995925	1.01032
1007	1.02019	1.0145	1.02247	1.00896	1.02309	1.0545	0.984649	1.00807
1008	1.01679	1.01053	1.02331	1.01069	1.01928	1.04481	0.9903	1.00168
1009	1.02113	1.01205	1.01637	1.00905	1.01498	1.03027	0.997613	1.00004
1010	1.02173	1.01218	1.00735	1.01145	1.01595	1.02093	1.00849	1.00105
1011	1.01698	1.02207	1.01837	1.01126	1.02054	1.01555	1.00353	1.0081
1012	1.01567	1.01976	1.01343	1.00822	1.02465	1.00359	1.01186	1.00705
1013	1.02618	1.02151	1.02071	1.00694	1.02206	0.995869	1.01731	1.00783
1014	1.03185	1.02509	1.02413	1.00915	1.02156	0.980678	1.01335	1.01344
1015	1.01786	1.01941	1.02939	1.00871	1.02055	0.977808	1.01413	1.01483
1016	1.03421	1.01607	1.01975	1.01229	1.01744	0.973765	1.00644	1.01205
1017	1.01917	1.02339	1.01363	1.00902	1.01492	0.983773	1.00876	1.01078
1018	1.01415	1.01977	1.02527	1.01255	1.01166	0.980809	1.02447	1.01138
1019	1.02532	1.02178	1.01022	1.0115	1.01376	0.978797	1.02636	1.01503
1020	1.02904	1.02209	1.03205	1.01118	1.01712	0.983	1.03508	1.01314
1021	1.03309	1.02651	1.03812	1.0137	1.00674	0.977535	1.02457	1.00744
1022	1.02326	1.02564	1.03227	1.0154	1.01029	0.98302	1.02231	1.01135
1023	1.02102	1.03371	1.031	1.00775	1.00861	0.987257	1.02586	1.0146
1024	1.02879	1.03583	1.02254	1.00689	1.01345	0.990106	1.0282	1.01084
1025	1.00784	1.0203	1.01157	1.01081	1.01134	0.992403	1.02082	1.01015
1026	1.02718	1.0224	1.01311	1.01234	1.02347	0.990784	1.01221	1.01159
1027	1.02373	1.02229	0.997173	1.01008	1.0335	0.990589	1.00265	1.01342
1028	1.00963	1.02674	1.00158	1.01238	1.03597	0.979065	1.00225	1.01152
1029	1.02806	1.02589	1.00558	1.01217	1.0329	0.978503	1.00336	1.01182
1030	1.01485	1.02753	1.01	1.01471	1.03552	0.975724	1.00024	1.01525
1031	1.02572	1.03267	1.01079	1.01316	1.03321	0.972643	0.998395	1.01508
1032	1.03107	1.03658	1.01521	1.01482	1.02939	0.974226	1.00001	1.01454
1033	1.02791	1.0378	1.00254	1.01018	1.02284	0.97391	0.999779	1.01463
1034	1.01623	1.04052	1.02126	1.01237	1.02685	0.969399	1.01255	1.01205
1035	1.02173	1.04181	1.01916	1.01188	1.02516	0.972054	1.00288	1.01317
1036	1.02074	1.03574	1.01783	1.01241	1.02707	0.968926	1.00558	1.01225
1037	1.01633	1.03853	1.00842	1.01471	1.03208	0.971544	1.00274	1.00381
1038	1.01799	1.03216	1.01764	1.01136	1.01899	0.977013	1.00507	0.997526
1039	1.01286	1.03575	1.01301	1.00984	1.02623	0.979739	1.0066	1.00552
1040	1.01687	1.03791	1.01484	1.00246	1.02838	0.988706	1.00564	1.00195
1041	1.01384	1.03894	1.01101	1.00747	1.02092	0.990344	1.00207	1.00491
1042	1.01301	1.02904	1.02193	1.0047	1.01666	0.990392	0.997393	1.00552
1043	1.01416	1.03194	1.01058	1.00331	1.01701	0.998964	0.998614	1.0045
1044	1.01272	1.03674	1.01424	1.00522	1.01581	1.00663	1.00159	1.00432
1045	1.01679	1.03614	1.01809	1.00681	1.01577	1.00529	1.00228	1.01216
1046	1.0142	1.04231	1.01809	1.00597	1.01646	1.00489	1.00495	1.01054
1047	1.0106	1.03122	1.01255	1.00699	1.01273	0.999683	1.00663	1.00992
1048	1.00913	1.03211	1.02438	1.01034	1.01241	1.0004	1.01822	1.00627
1049	1.0151	1.03306	1.01023	1.0101	1.0065	0.993408	1.01857	1.01801
1050	1.00921	1.03586	1.00771	1.01085	1.00364	1.00035	1.0062	1.01889
1051	1.01441	1.04689	1.01342	1.01046	1.00956	0.984437	1.00436	1.00679
1052	1.01623	1.04099	1.00939	1.00983	1.02101	0.976526	0.993338	1.01468
1053	1.02456	1.03883	1.01296	1.00733	1.01589	0.97355	0.997354	1.02602
1054	1.02103	1.03752	1.0153	1.0048	1.0216	0.971584	0.999441	1.01623
1055	1.01688	1.03313	1.01794	1.00708	1.02024	0.978298	1.01007	1.01246
1056	1.00543	1.03217	1.02614	1.00382	1.02346	0.980684	1.01213	1.01679
1057	1.01937	1.03932	1.01859	1.00234	1.01884	0.989681	1.01245	1.0074
1058	1.01735	1.04395	1.02457	1.0039	1.01596	1.00309	1.01386	1.00744
1059	1.01551	1.0458	1.03006	1.006	1.01082	1.00469	1.00169	1.0122
1060	1.01523	1.0488	1.01743	1.00606	1.01615	0.993255	0.997983	1.0129
1061	1.01765	1.04956	1.01288	1.00986	1.01498	0.998986	1.0029	1.01384
1062	1.00842	1.04156	1.01807	1.00351	1.02373	1.00899	1.00148	1.01731
1063	1.02405	1.04028	1.0205	1.00336	1.02176	0.996376	1.00682	1.01643
1064	1.01073	1.03861	1.02591	1.00606	1.02775	0.991983	1.01079	1.01963
1065	1.01707	1.0407	1.01095	1.00292	1.02458	0.988178	1.02419	1.015
1066	1.02261	1.03862	1.02009	1.00555	1.02189	0.996736	1.01639	1.00463
1067	1.00735	1.04	1.0247	1.00444	1.02401	0.994817	1.0154	1.00094
1068	1.03628	1.05171	1.01373	1.00645	1.02336	0.994598	1.01236	1.01071
1069	1.02736	1.06255	1.02045	1.00645	1.02307	0.996171	1.02313	1.00835
1070	1.02744	1.0577	1.01443	1.00662	1.01443	0.990831	1.01251	1.01226
1071	1.02242	1.04758	1.01198	1.00282	1.01294	0.998976	1.00949	1.01036
1072	1.01063	1.04133	1.02216	1.00938	1.00582	1.00687	1.01766	1.01072
1073	1.02716	1.05316	1.01939	1.01079	1.00546	1.01446	1.01301	1.00589
1074	1.02508	1.04523	1.01671	1.01019	1.00946	1.01684	1.0151	1.01231
1075	1.03152	1.04057	1.01153	1.00854	1.01271	1.00944	1.01257	1.01117
1076	1.01446	1.04273	1.02567	1.00644	1.01485	0.997379	1.00039	1.00811
1077	1.00882	1.04031	1.02328	1.00747	1.01416	0.9898	0.994316	1.00708
1078	1.02237	1.03836	1.01997	1.00751	1.01924	1.00211	0.994252	1.01261
1079	1.01929	1.0352	1.02795	1.01077	1.01801	1.00245	1.00921	1.00872
1080	1.01225	1.02851	1.00591	1.01028	1.01666	1.00513	1.01444	1.01278
1081	1.01386	1.02568	1.00647	1.01157	1.01254	1.00216	1.01522	1.01585
1082	1.01523	1.03225	0.996468	1.00936	1.00945	1.00224	1.01332	1.01044
1083	1.0117	1.03042	1.01899	1.00717	1.00633	1.00742	1.01561	1.00804
1084	1.01149	1.02911	1.00085	1.00559	1.0125	1.01252	1.01297	1.0108
1085	1.0004	1.02861	1.00526	1.00589	1.01195	1.01655	1.01064	1.00972
1086	1.00979	1.02736	1.01481	1.01048	1.01167	1.01104	1.013	1.0062
1087	1.01547	1.03514	1.01608	1.00833	1.00979	1.00587	1.01557	1.00676
1088	1.01381	1.03742	1.01645	1.0125	1.01659	1.01899	1.0159	1.01525
1089	1.00291	1.03066	1.01049	1.01042	1.01971	1.02885	1.01381	1.00852
1090	1.00945	1.02502	1.00456	1.01605	1.00839	1.04516	1.01058	1.00943
1091	1.01855	1.0264	1.0175	1.01203	1.01452	1.04136	1.01423	1.00512
1092	1.01	1.02242	1.0153	1.00562	1.01441	1.05097	1.01317	1.00366
1093	1.00896	1.02298	1.00683	1.00487	1.01134	1.05913	1.01034	1.00443
1094	1.01208	1.02097	1.01777	1.00888	1.01035	1.06049	1.00454	0.999726
1095	1.01423	1.01848	1.00777	1.00834	1.01361	1.04631	1.01336	1.00107
1096	1.01989	1.01642	1.02559	1.00851	1.00991	1.04114	1.02015	1.00305
1097	0.993643	1.01634	1.02929	1.00812	1.012	1.04519	1.01646	1.00336
1098	1.0188	1.01799	1.01038	1.00886	1.01825	1.04042	1.01281	1.01455
1099	1.02342	1.00804	1.00943	1.00614	1.02322	1.04724	1.00166	1.00931
1100	1.01149	1.01338	1.02138	1.00365	1.02566	1.0499	0.997916	1.01025
1101	1.02351	1.01278	1.00947	1.00098	1.03503	1.05019	1.00516	1.0085
1102	1.02437	1.01717	1.0087	1.00253	1.02482	1.04512	1.00524	1.0075
1103	1.01731	1.0213	1.01793	1.00495	1.02435	1.05191	1.0053	1.00018
1104	1.0083	1.01884	1.01638	1.00464	1.03027	1.06495	1.00596	0.999559
1105	1.00036	1.01804	1.01374	1.009	1.02761	1.07568	1.00414	1.00561
1106	1.02099	1.02741	1.00814	1.00743	1.02885	1.08018	0.995444	1.00979
1107	1.01565	1.02209	1.01359	1.00461	1.02802	1.08651	0.987951	1.01069
1108	1.01212	1.0195	1.00814	1.00436	1.03425	1.08828	0.987751	1.01028
1109	1.01763	1.02625	1.00924	1.00237	1.03387	1.07686	1.00394	1.00289
1110	1.00606	1.02369	1.00918	1.00435	1.03965	1.07209	1.01152	1.00596
1111	1.02066	1.01745	1.01153	1.00243	1.043	1.08459	1.00401	1.00741
1112	1.01054	1.0122	1.01309	1.00407	1.04152	1.07868	0.997338	1.01271
1113	1.01808	1.01075	1.01621	0.997817	1.04352	1.07553	0.997996	1.01603
1114	1.00376	1.00535	1.01067	1.00117	1.0452	1.06226	0.996749	1.01518
1115	1.00804	1.01538	1.02389	1.00644	1.04125	1.0672	0.993269	1.01217
1116	1.01457	1.02266	1.01666	1.00644	1.03469	1.0636	0.992387	1.01474
1117	1.01331	1.02455	1.01752	1.00819	1.02673	1.05679	0.998582	1.01
1118	1.01634	1.00942	1.0101	1.01152	1.0164	1.04376	1.00166	1.00751
1119	1.00967	1.01847	1.01489	1.00645	1.01912	1.03534	1.00676	1.00563
1120	1.01598	1.01846	1.00378	1.00785	1.01621	1.03118	1.00098	1.0063
1121	1.02929	1.02271	1.01318	1.00158	1.01358	1.02725	0.993832	1.00488
1122	1.01023	1.02739	1.00961	1.00305	1.00394	1.01352	0.991486	0.998479
1123	1.01466	1.03201	1.01405	1.00316	1.0002	1.00979	1.0047	0.999877
1124	1.01094	1.03163	1.01231	1.00657	0.994316	1.00083	1.0041	1.0017
1125	1.01566	1.03402	1.01008	1.00716	0.996579	0.997579	1.00213	1.00575
1126	1.00955	1.0242	1.01631	1.00895	0.995301	0.990091	1.01375	1.00278
1127	1.00776	1.01616	0.99794	1.00739	0.997731	0.99396	1.01889	1.00534
1128	1.01443	1.01849	1.0164	1.00643	0.999657	1.00162	1.02183	1.00159
1129	1.00706	1.00871	1.01001	1.00438	0.99837	0.991183	1.02531	1.00649
1130	1.00632	1.01001	1.00969	1.00635	1.00287	0.99365	1.02331	1.00862
1131	1.00521	1.00736	1.00852	1.00622	0.998591	0.998354	1.03297	1.01209
1132	1.0118	1.0157	1.00754	1.00879	1.00075	0.996088	1.03607	1.00334
1133	1.00987	1.01307	1.01035	1.00621	1.00254	0.992339	1.03124	0.998609
1134	1.00891	1.0113	1.02002	1.00587	0.998307	0.991375	1.0357	0.998066
1135	1.02056	1.01513	1.01168	0.99966	1.00313	0.988735	1.03281	0.997979
1136	1.00531	1.01978	1.01406	0.998858	0.995009	0.980098	1.0209	1.00249
1137	1.0215	1.02291	1.00313	1.00353	1.00093	0.981676	1.01313	1.00347
1138	1.005	1.02153	1.00934	1.00403	1.00108	0.981167	1.01795	1.00878
1139	1.0162	1.02057	1.01306	1.00529	0.999033	0.981151	1.02397	1.0112
1140	1.01578	1.02559	1.00335	1.00494	0.999861	0.977065	1.01816	1.00905
1141	1.01691	1.02808	1.0142	1.00514	0.992957	0.973018	1.01299	1.00466
1142	1.01696	1.02663	1.01915	1.00759	0.995525	0.971578	1.01534	1.00488
1143	1.00828	1.02382	1.01246	1.00419	0.99704	0.968973	1.01755	1.00514
1144	1.01589	1.02558	1.00782	1.002	0.998815	0.981884	1.0255	1.00254
1145	1.01275	1.02162	1.01424	1.00354	1.00156	0.977106	1.02049	1.00547
1146	1.00714	1.03115	1.00839	1.00244	0.999753	0.980797	1.0153	1.005
1147	1.00672	1.02834	1.01617	1.00074	1.00517	0.988583	1.0227	1.00892
1148	1.01729	1.01903	1.01362	1.00049	1.00211	0.986008	1.03277	1.00511
1149	1.0211	1.02922	1.00378	1.00454	0.989535	0.983984	1.02759	1.00176
1150	1.008	1.03074	1.00576	1.00441	0.988166	0.973429	1.0213	1.00543
1151	1.00582	1.03349	1.00007	1.00139	0.985008	0.961663	1.01097	1.01207
1152	0.998082	1.02761	1.00841	1.00334	0.990563	0.968769	1.01536	1.00987
1153	0.996741	1.03251	1.00476	1.00238	0.98755	0.971184	1.01908	1.00552
1154	1.00351	1.03125	0.997475	1.00239	0.990242	0.974556	1.01989	1.00694
1155	0.994264	1.02095	1.0167	1.00253	0.99159	0.982315	1.00567	1.01601
1156	1.00629	1.01753	1.00574	1.00965	0.99719	0.983106	1.00186	1.01148
1157	1.01393	1.01029	1.00887	1.01387	0.995351	0.980171	1.0009	1.00095
1158	0.996366	1.01349	1.00193	1.01076	1.00387	0.984522	0.998133	0.99863
1159	1.0111	1.01678	1.01282	1.01322	0.999211	0.99687	0.990284	0.997244
1160	1.00153	1.02959	1.00751	1.00822	0.993943	0.990237	0.996614	1.0011
1161	0.999524	1.02145	1.007	1.0088	0.993768	0.990593	0.997943	1.00267
1162	1.01771	1.01523	1.00418	1.0073	0.996904	0.986819	1.00653	1.00997
1163	1.00464	1.02073	1.00168	1.0098	1.00665	0.97624	1.0187	1.01235
1164	1.00948	1.01676	1.0028	1.01437	1.00192	0.984093	1.01725	1.00947
1165	0.9994	1.00888	1.01532	1.01206	1.00086	0.984317	1.00656	1.00692
1166	1.00079	1.016	1.0078	1.01318	1.00196	0.983894	1.00007	1.00066
1167	1.00239	1.01625	1.01172	1.00612	1.00681	0.984443	0.992876	1.0005
1168	1.01168	1.01291	1.00407	1.0111	1.00638	0.986685	0.985096	0.994717
1169	1.00981	1.01727	1.01264	1.00537	1.01108	0.988356	0.976137	0.990678
1170	1.01537	1.01296	1.01184	1.00686	1.01138	0.988747	0.987434	0.992134
1171	1.01375	1.01188	1.00975	1.00559	1.00864	0.982786	0.979431	0.997798
1172	1.00784	1.008	1.0121	1.005	1.01316	0.981872	0.97251	0.994786
1173	1.00985	1.00733	1.01254	1.00423	1.01582	0.988857	0.971675	0.988749
1174	1.0092	1.00242	1.00682	1.00181	1.01355	0.983912	0.98154	0.995344
1175	1.00821	1.00713	1.00846	1.00714	1.00861	0.979653	0.988622	1.00307
1176	1.00401	1.00314	1.02675	1.00561	1.00327	0.972798	0.991071	1.00238
1177	1.01218	1.00406	1.0254	1.00723	1.00714	0.966461	1.00151	0.998722
1178	1.01015	1.00403	1.01093	1.00831	1.01519	0.967066	1.00737	1.00068
1179	1.01948	0.993773	1.00989	1.01051	1.01492	0.973439	1.00951	1.00533
1180	1.02285	1.00001	1.00942	1.01145	1.01173	0.978608	1.01546	1.01107
1181	1.01423	1.00201	1.00558	1.01207	1.01789	0.981727	1.00535	1.00671
1182	1.00698	1.00041	1.01247	1.01325	1.02371	0.984099	1.00484	1.00851
1183	1.01838	1.00537	1.00897	1.00879	1.01902	0.996042	1.0021	1.01242
1184	1.00723	1.00692	1.00272	1.00642	1.01625	0.992591	1.00631	1.00997
1185	1.00169	0.999245	1.01496	1.00543	1.01616	0.995538	1.00107	0.998965
1186	1.01017	0.998458	1.01616	1.00438	1.01504	1.00531	1.00282	1.00072
1187	1.00939	1.00019	1.00693	1.00427	1.01376	1.00909	1.00406	1.00408
1188	1.01497	1.00023	1.01571	1.00351	1.01663	1.016	1.00907	1.00785
1189	1.01817	0.99435	1.01452	1.0062	1.02109	1.02228	1.00285	1.00618
1190	1.00994	0.997104	1.01805	1.00757	1.01921	1.0091	1.00193	1.00241
1191	1.01467	0.988653	1.00458	1.00615	1.02284	1.00983	1.01487	1.00092
1192	1.00304	0.984274	1.01524	1.00604	1.02943	1.02231	1.00689	1.00502
1193	1.01119	0.982352	1.00779	1.00265	1.02634	1.02074	0.996881	1.00851
1194	1.01308	0.988675	1.00978	0.997556	1.01926	1.01974	0.991095	1.01225
1195	1.00393	0.989285	1.00583	0.998739	1.01594	1.02481	0.988469	1.00779
1196	1.01067	0.987081	1.00574	0.997523	1.01176	1.0164	0.9904	1.00929
1197	1.01687	0.993567	1.00787	1.0003	1.00531	1.00527	1.00373	1.00596
1198	1.0033	0.999118	1.00739	0.999609	1.00032	1.0061	0.996572	1.00792
1199	1.00463	1.00009	1.00854	0.997916	0.999814	1.0117	0.991835	1.01196
1200	1.01541	0.998308	1.00847	1.00133	0.997534	1.00464	0.991248	1.01419
1201	0.997243	1.00079	1.01274	0.998641	0.994579	1.01506	0.996987	1.01437
1202	1.01023	1.00645	1.00555	1.00249	0.999169	1.02563	0.995317	1.01623
1203	1.0139	1.008	1.00349	1.00061	0.995649	1.03825	1.00294	1.01544
1204	0.998211	1.00568	1.00532	1.00109	0.99829	1.04979	1.00058	1.01145
1205	1.00602	1.00594	1.01251	1.00011	0.992204	1.05659	0.999042	1.00674
1206	1.01079	0.999318	0.996626	0.996744	0.991483	1.06085	0.996297	1.01282
1207	0.997146	0.998923	1.01327	1.00107	0.991112	1.06303	0.999317	1.01054
1208	1.00708	0.999797	1.00271	1.00357	0.987289	1.0525	1.00354	1.00709
1209	1.00779	1.00009	1.00941	1.00115	0.991478	1.06269	1.00658	1.00171
1210	0.999712	1.00139	0.994066	0.999039	0.988973	1.06511	1.0043	1.00698
1211	1.00982	0.994262	0.999586	1.00383	0.986727	1.07141	0.987637	1.00133
1212	1.01418	0.99088	0.998745	1.00143	0.984378	1.06911	0.992847	1.00551
1213	1.00353	0.995311	0.997625	1.00135	0.986172	1.06902	0.996083	1.00161
1214	1.00752	0.999371	1.00068	0.998757	0.991636	1.07507	0.99467	1.01386
1215	1.00959	1.00712	1.00425	0.999958	0.995008	1.07549	1.0005	1.00837
1216	1.00437	1.00986	1.01104	0.999168	1.00039	1.09058	1.00305	1.00293
1217	1.00062	1.01392	1.00747	1.0009	0.998982	1.09973	0.999293	0.997848
1218	0.995278	1.02316	1.00616	1.00393	1.00354	1.10068	0.982427	1.00611
1219	1.01304	1.02018	1.01192	1.00505	0.992011	1.07706	0.994495	1.00543
1220	1.00233	1.00664	1.00461	1.00432	0.98892	1.04394	1.00098	1.00072
1221	1.00796	1.01302	0.995672	1.00489	0.983837	1.03712	1.01149	1.00746
1222	1.00043	1.00973	1.00277	1.00364	0.984269	1.03597	1.01634	1.01034
1223	1.01066	1.00613	1.01397	1.00552	0.989191	1.02593	1.02141	1.01107
1224	1.01258	1.01012	1.00114	1.00649	0.993546	1.02789	1.02055	1.01153
1225	1.0075	1.00527	0.989267	1.00771	0.990607	1.00787	1.01719	1.01308
1226	1.01588	1.00482	1.01194	1.00351	0.991624	0.995587	1.02166	1.01113
1227	1.00293	1.01252	1.00381	1.00941	0.988936	0.990229	1.01761	0.994636
1228	1.00666	1.01045	0.996174	1.00988	0.98704	0.985577	1.02548	0.994751
1229	1.00911	1.01295	1.00582	1.00892	0.983196	0.976956	1.01428	1.00121
1230	1.00095	1.00707	1.00275	1.00286	0.989363	0.97564	0.999008	0.99713
1231	1.0147	1.00073	1.00047	0.999595	0.997698	0.984474	0.996876	0.998634
1232	1.01399	1.00007	0.999315	1.00431	0.994858	0.989681	1.00675	1.00158
1233	0.998386	0.998124	1.00305	1.00152	0.99083	0.996769	1.00951	1.01134
1234	1.02146	1.00567	1.00251	0.998305	0.995961	1.00521	1.02143	1.01162
1235	1.01012	0.995558	1.0031	0.99731	1.00396	1.01069	1.01217	1.01094
1236	1.00941	0.99848	1.00444	0.999535	1.00425	1.00331	1.00574	0.99723
1237	1.00485	0.997705	1.00987	1.00244	1.00737	1.00296	1.00592	1.00096
1238	1.01328	0.995601	1.00936	1.00348	0.997701	1.01077	1.00944	0.993744
1239	1.00896	1.00331	0.998789	1.00159	0.989969	1.01046	1.0075	0.999512
1240	1.01861	0.996894	1.0048	1.0063	0.987716	1.01776	1.01492	0.995153
1241	1.00516	1.00174	1.00137	1.0049	1.00202	1.0193	1.00643	0.988394
1242	1.0104	1.00093	0.996379	1.00141	1.00142	0.993774	0.99948	0.989875
1243	1.00413	1.00322	1.00191	1.0066	1.00137	0.978857	0.995209	0.996346
1244	1.00525	1.00275	1.01297	1.00005	0.994256	0.979798	0.990416	0.998971
1245	1.00877	0.993811	0.996971	1.00068	0.991216	0.990247	0.985246	1.00602
1246	0.994814	1.00007	1.00657	1.00135	0.99434	0.988223	0.986971	1.00924
1247	0.997843	1.00844	1.01318	1.00185	0.993395	0.99162	0.981011	1.01108
1248	1.00432	1.01295	0.996805	1.00113	0.992652	1.00095	0.979653	1.00634
1249	1.01603	1.01316	1.00688	1.00286	0.991537	0.991408	0.980018	1.00546
1250	1.01305	1.01914	1.0015	1.00229	0.99197	0.99575	0.97797	1.00661
1251	0.996756	1.02595	1.0089	1.00213	0.996137	0.99198	0.984834	1.00246
1252	0.998312	1.01554	1.00777	1.0034	0.996148	0.993505	0.989249	1.01265
1253	0.994003	1.00953	1.00434	1.00336	0.989966	0.997579	0.999845	1.01042
1254	1.00495	1.00936	1.0101	1.00035	0.985321	0.990613	1.00993	1.01027
1255	1.00434	1.00534	1.0074	0.999802	0.993154	0.998994	1.01897	1.01425
1256	1.00093	1.00784	1.01769	1.00181	0.997816	0.998484	1.01699	1.00982
1257	1.00041	1.00885	1.01747	1.00085	0.99324	1.00395	1.01451	1.01378
1258	1.00116	1.00824	1.01051	0.998084	1.00293	1.00595	1.00324	1.01265
1259	1.00214	1.00779	1.0146	1.00253	1.00375	1.0099	1.00356	1.00753
1260	1.00156	1.00863	1.0134	1.00198	1.0054	1.01056	1.0072	0.999568
1261	1.00315	1.00664	1.00911	1.00216	1.00447	1.01203	1.00645	1.00203
1262	1.0065	1.00282	1.01741	1.00321	1.00901	1.00915	1.01016	1.00631
1263	1.00815	1.00699	1.02801	1.00301	1.01142	1.00539	1.01311	1.00811
1264	1.00714	1.00299	1.01009	1.00077	1.01964	1.00153	1.00647	1.00499
1265	1.00151	1.00231	1.00719	1.00339	1.02092	0.994948	1.00629	0.997616
1266	1.00914	1.01314	1.00093	1.00037	1.01998	1.00122	1.00381	0.999815
1267	1.00717	1.02219	1.00718	1.00399	1.01486	1.00698	1.01664	1.00788
1268	0.9969	1.02887	1.01698	1.00303	1.02176	1.01914	1.02147	1.00401
1269	1.00424	1.01915	0.997504	0.997032	1.02367	1.01698	1.01224	1.00153
1270	1.00313	1.01599	0.991459	0.997841	1.02829	1.01332	1.00607	0.994502
1271	0.992969	1.00794	0.991414	0.997133	1.03035	1.02114	0.994194	1.00141
1272	1.00901	1.00377	1.00754	0.999002	1.01677	1.03407	0.994757	0.996836
1273	1.00031	1.00935	0.999938	0.996257	1.01016	1.04138	1.0009	0.989991
1274	1.00794	1.00942	0.997625	0.999492	1.0161	1.03945	0.996511	0.992562
1275	0.993628	1.01244	1.00035	0.996028	1.01804	1.03983	0.992395	1.00078
1276	1.00703	1.01251	0.997699	0.998656	1.01722	1.03946	0.995851	1.01072
1277	1.00682	1.00622	0.997565	1.00059	1.02006	1.04878	0.995074	1.01697
1278	1.00347	1.00181	0.996963	0.998429	1.02304	1.03687	0.99426	1.01912
1279	1.00217	0.998034	1.00012	1.00053	1.02345	1.04329	1.00086	1.01372
1280	1.0068	1.00185	1.00478	1.00421	1.01521	1.04172	1.00663	1.00686
1281	0.996756	0.99559	1.00435	1.00033	1.01765	1.04204	1.01283	1.00158
1282	1.00921	0.992552	1.0081	1.00055	1.01295	1.05298	1.01449	1.00426
1283	1.0176	0.992788	1.02002	1.00838	1.01017	1.05374	0.996736	1.00723
1284	0.994018	0.988278	1.01469	1.00621	1.00436	1.0632	0.990638	1.00222
1285	1.00251	0.99114	1.01842	1.00251	1.00149	1.07092	0.994368	0.998354
1286	1.01156	0.993877	1.01277	1.00426	1.00464	1.06621	0.996408	1.00188
1287	0.995177	0.996932	1.0171	1.00522	0.999166	1.05514	1.00083	1.00093
1288	1.00049	0.994289	1.0083	1.00286	1.00006	1.03446	0.999686	0.989508
1289	1.00461	0.988165	1.01613	1.00596	1.0049	1.03716	1.00047	0.986981
1290	1.00375	0.994418	1.00737	1.00551	1.01288	1.03789	0.990638	0.986357
1291	1.00583	0.991581	1.01148	1.00482	1.01295	1.02485	0.996308	0.992076
1292	1.00444	0.985124	1.00595	1.00339	1.01271	1.03027	1.00168	0.99339
1293	1.00946	0.988318	0.999375	1.00184	1.00334	1.01828	0.991502	1.00201
1294	1.0053	0.982757	0.996747	1.00291	0.999012	1.01046	0.997499	1.00721
1295	1.0081	0.990296	0.998834	1.00036	0.99036	1.00991	0.998833	0.999255
1296	0.996163	0.995643	0.990888	0.999458	0.994421	0.999091	1.01109	0.998522
1297	1.00334	0.990197	1.00481	1.00137	0.98929	1.00027	1.00454	0.999252
1298	0.994822	0.990709	1.00518	0.999233	0.992437	1.00509	1.00781	0.995116
1299	1.01477	0.995161	0.999029	1.00301	0.99433	1.00844	1.0111	0.995855
1300	0.998459	0.993445	0.988757	1.00321	0.996493	1.01112	1.01673	0.994771
1301	1.00052	0.997168	0.990715	1.00313	0.993095	1.0107	1.01734	1.00026
1302	1.00246	0.995003	1.00369	1.00978	0.994549	1.0182	1.01452	1.0003
1303	1.00204	1.00299	0.98416	1.00817	0.990769	1.01809	1.02282	0.998635
1304	0.989955	1.00534	0.992045	1.0102	0.991094	1.01487	1.01932	0.999417
1305	0.99541	1.00487	0.998361	1.01263	0.992985	1.02367	1.02152	0.993498
1306	0.995828	1.0018	0.99927	1.00872	0.993572	1.01722	1.0109	0.993699
1307	1.01688	1.00662	0.998616	1.00691	0.989448	1.01476	0.99957	0.990137
1308	1.00842	1.00759	1.00671	1.00663	0.994427	1.01679	0.990081	0.992141
1309	0.998269	0.999418	0.99773	1.00758	0.990026	1.01279	0.988667	0.990579
1310	1.01035	1.00121	1.00616	1.00466	0.993533	1.01931	0.984974	0.992325
1311	1.00178	1.00616	0.988455	1.00525	0.994112	1.01111	0.989935	0.985309
1312	1.0085	1.01277	0.990386	1.00305	0.988906	1.0061	0.991906	0.982857
1313	1.00357	1.01317	1.00959	1.00255	0.991587	1.00668	0.98742	0.987693
1314	0.9952	1.01886	1.00311	1.00394	0.986584	0.999769	0.997895	0.992859
1315	1.00761	1.01377	1.00031	0.997109	0.993682	1.00707	0.998688	1.00425
1316	1.00196	1.01711	1.00832	0.999648	0.987915	1.01019	1.00362	0.995902
1317	1.00704	1.00993	1.0079	0.996746	0.997175	1.00255	0.997238	0.998419
1318	1.00782	1.00091	1.00724	0.999711	0.997801	0.983527	0.998527	0.997772
1319	1.01331	1.00237	1.01	1.00422	1.00437	0.986558	1.00474	0.997004
1320	1.0052	1.00994	1.00589	1.00318	1.00097	0.990587	1.00397	0.99978
1321	1.0054	1.01067	0.998915	1.0056	1.00818	0.993616	0.99649	1.00061
1322	1.01186	1.00711	1.00965	1.00411	1.00887	0.995575	0.996899	1.00851
1323	1.01211	1.00481	0.999404	1.00145	1.00645	1.00149	0.993938	1.00652
1324	1.00492	1.00353	0.997617	1.00328	1.00681	0.997635	0.995993	1.01121
1325	1.00729	0.999497	0.991985	1.00312	1.01074	1.00095	1.00324	1.00593
1326	1.01529	0.99652	0.990965	1.00541	1.01045	1.00155	1.00695	0.998481
1327	1.00293	0.994058	0.993614	1.00359	1.0081	1.00031	0.996112	0.991639
1328	1.00653	0.988367	0.998106	1.00324	0.999682	1.00217	0.989729	0.993535
1329	1.00314	0.994639	0.990754	1.00383	0.995349	0.999538	0.992543	1.00127
1330	1.01112	0.9983	0.989283	1.00398	0.990512	0.994659	0.995539	0.999166
1331	1.00999	0.987641	0.989919	1.00521	0.998042	0.983966	0.999129	0.994297
1332	1.00419	0.987398	0.998834	1.00178	1.00103	0.979077	0.999023	0.997381
1333	0.9983	1.00174	1.01336	1.00366	0.997851	0.971343	0.998329	0.996435
1334	0.99848	1.00439	0.989716	1.00654	0.997975	0.96558	1.00388	0.997678
1335	1.00848	1.00043	1.00323	1.00092	1.00054	0.9686	1.01269	0.998725
1336	1.013	1.00128	1.00413	1.00274	1.00083	0.964542	1.00835	1.00164
1337	1.00493	1.00242	1.00365	1.00084	0.989729	0.957545	1.00769	1.00442
1338	1.01476	1.00148	1.00061	1.00132	0.988436	0.966331	0.998286	1.01058
1339	1.00502	1.00393	1.01407	1.00476	0.988098	0.9674	0.999285	0.996267
1340	1.0079	0.995037	0.987322	1.00356	0.993099	0.970141	1.01014	0.99664
1341	0.996322	1.00067	1.01067	1.00352	0.987442	0.972456	1.00021	0.997054
1342	1.00131	1.01118	1.01049	1.00271	0.989214	0.973553	1.00873	1.00122
1343	0.997653	1.00739	1.00619	1.00373	0.992063	0.973598	1.00442	1.0054
1344	1.00774	1.00076	0.997819	1.00679	0.989658	0.977913	1.00145	1.00567
1345	1.00424	0.996049	1.00207	1.00188	0.987537	0.971205	1.0068	0.997856
1346	0.992077	1.00713	1.02365	1.00318	0.992915	0.976792	1.01335	0.993307
1347	0.991671	1.01986	1.00132	1.0039	0.995306	0.975543	1.0027	0.9949
1348	0.999255	1.01677	1.00966	1.0052	0.994584	0.97352	1.01209	1.00606
1349	1.0023	1.00359	1.01027	1.00546	0.985779	0.967602	1.00164	1.00456
1350	1.00793	0.997779	0.999675	1.00247	0.98053	0.965841	0.99351	1.0026
1351	0.996771	0.989082	1.00154	1.0024	0.981527	0.959021	0.983719	1.00569
1352	1.00253	0.990191	0.998458	1.00121	0.975044	0.9594	0.983637	1.00397
1353	1.00118	0.999832	0.997641	0.998686	0.977032	0.97012	0.983714	0.99
1354	0.996018	0.999208	0.991107	0.993322	0.983887	0.984663	0.977516	0.991334
1355	1.00407	0.991307	0.997557	0.996998	0.980948	0.997773	0.984913	0.991369
1356	0.995598	0.995089	0.991422	1.00193	0.980977	1.00557	0.994862	0.997695
1357	1.00252	0.988868	0.987629	1.00267	0.972598	1.00562	0.990218	0.998838
1358	0.997372	0.984604	0.993396	1.00139	0.975528	1.00071	0.986942	0.996964
1359	1.0039	0.985679	0.997023	1.00181	0.979114	1.00002	0.991505	0.999977
1360	0.995227	0.989057	0.99209	1.00021	0.982183	0.994423	0.99654	0.999362
1361	0.995975	0.993339	0.986299	1.00013	0.981129	1.00352	0.994453	0.997983
1362	1.01204	0.995773	1.00387	1.00138	0.980066	1.00225	0.997597	0.991301
1363	0.99557	0.995941	0.986796	1.00132	0.986075	0.996966	0.992469	0.990923
1364	0.995321	0.999177	0.985203	1.00194	0.982992	0.992959	0.99063	0.997497
1365	0.996082	0.999524	0.993359	1.00305	0.982779	1.00547	0.981989	0.995605
1366	1.00138	1.00114	1.00309	1.00072	0.980342	1.00628	0.979857	0.996898
1367	0.993613	1.0009	1.01482	0.999168	0.984235	0.998082	0.98067	0.991029
1368	0.997395	0.996746	0.999893	1.00387	0.980257	1.00487	0.973733	1.00003
1369	0.994396	0.998182	0.993254	1.00311	0.985303	0.999914	0.974594	1.00156
1370	0.991222	0.985151	0.99716	1.00131	0.977959	1.00112	0.976071	0.997726
1371	0.99181	0.984046	1.00356	1.00237	0.979057	0.987524	0.974568	0.993209
1372	1.00433	0.982816	1.01047	1.00695	0.983157	0.994379	0.980686	0.994801
1373	0.99123	0.989957	1.00683	0.999754	0.981457	1.00734	0.990202	0.992442
1374	1.01585	0.985905	0.996963	0.999296	0.978527	1.01826	0.993779	0.991446
1375	0.998827	0.982444	1.00951	1.00074	0.978875	1.02233	0.98997	0.992412
1376	1.00102	0.985135	1.00909	1.00348	0.991116	1.01922	0.999449	0.993931
1377	1.00318	0.982704	0.992345	1.00354	0.981845	1.01989	1.00405	0.999377
1378	0.997451	0.981258	1.0026	1.00369	0.981249	1.02739	1.00167	1.00082
1379	0.99525	0.984687	1.00335	1.00465	0.981989	1.03825	0.995103	0.996589
1380	1.00332	0.982447	0.995927	1.00111	0.977788	1.04373	0.993333	0.996985
1381	0.998921	0.984362	0.99122	1.00227	0.975435	1.02916	0.999132	0.985664
1382	0.989377	0.979481	0.996642	1.00055	0.977466	1.03249	1.0016	1.00094
1383	0.997575	0.988624	0.990865	0.99859	0.97815	1.05035	1.00926	1.00014
1384	1.00347	0.988607	0.984378	0.998664	0.976921	1.0502	1.00331	0.997267
1385	0.982627	0.989211	0.994184	0.99808	0.977178	1.04994	0.989687	0.989218
1386	0.997785	0.987958	0.982651	0.999127	0.977676	1.06661	0.990752	0.990765
1387	1.00747	0.991848	0.989335	1.00343	0.983302	1.06745	0.996329	0.997487
1388	1.00102	0.98975	1.00012	1.00847	0.976618	1.06872	0.997533	1.00018
1389	1.00585	0.986699	0.995328	1.00832	0.981787	1.06369	1.00121	0.997666
1390	1.00248	0.981498	0.988074	1.00705	0.986514	1.06046	1.00896	1.00115
1391	0.996525	0.988208	0.995567	1.00435	0.986835	1.0635	0.999776	0.994184
1392	1.00205	0.997619	0.999052	1.00685	0.993293	1.03248	1.00335	0.99185
1393	0.993078	1.00393	0.998248	1.00485	0.992263	1.01384	1.0084	0.998421
1394	1.00414	1.01091	1.00057	1.00675	0.990579	1.0122	1.01378	0.993769
1395	0.985385	1.01254	0.99272	1.00689	0.99411	1.01282	1.0091	0.994155
1396	0.99811	1.00582	1.0029	1.00938	0.994834	1.01419	1.0058	0.993962
1397	0.996994	0.999739	1.00338	1.01243	0.996943	1.00468	1.00853	0.99884
1398	0.999357	1.01214	1.00825	1.00698	0.992152	0.999874	1.0026	1.00444
1399	1.00613	1.01912	1.0021	1.00592	0.995491	0.999358	1.00053	1.00279
1400	0.988862	1.01494	0.985437	1.00735	0.989841	1.00014	0.998004	1.00063
1401	0.990695	1.00427	0.980509	1.00702	0.994925	0.993917	1.00142	0.9978
1402	1.00317	0.996468	0.991002	1.00102	0.984966	0.994525	1.00039	0.994568
1403	1.00837	1.00149	0.99824	0.99975	0.983894	0.98635	0.999227	0.991383
1404	0.998675	1.00191	1.00415	1.00293	0.986796	0.984292	0.99751	0.993298
1405	1.00365	0.999856	0.992757	1.00082	0.984867	0.973268	1.00295	0.990266
1406	0.997146	1.00787	0.999728	1.00312	0.986282	0.974206	0.995483	0.990381
1407	0.98884	1.0126	0.999283	1.00501	0.9858	0.971218	0.992731	0.995854
1408	0.997902	1.00863	0.99691	1.00941	0.986167	0.975114	0.987592	0.990643
1409	0.998401	1.01458	1.00033	1.00893	0.989927	0.97955	1.00005	0.988647
1410	1.00002	1.0153	0.992841	1.00743	0.995492	0.977388	1.0087	0.991464
1411	1.00276	1.00623	0.998248	1.00591	1.00221	0.977984	1.003	0.993259
1412	1.0052	0.99672	0.99209	1.00004	1.00173	0.983783	0.994825	1.00095
1413	0.99722	0.993894	1.0032	1.00236	0.995996	0.97709	1.00387	0.998956
1414	0.992895	0.991256	0.993412	1.00013	1.00094	0.977764	1.00754	1.00589
1415	0.997306	0.993637	0.993165	1.00321	0.986026	0.965499	1.00196	1.00828
1416	0.994576	0.990357	0.996258	1.00313	0.993669	0.965789	1.00566	1.0083
1417	1.00824	0.9856	0.993073	1.00532	0.991039	0.97366	1.01173	0.996518
1418	0.999342	0.982779	0.990339	1.00496	0.996359	0.975986	1.00472	0.993929
1419	1.00266	0.990379	0.993901	1.00366	1.001	0.973187	1.00404	0.991097
1420	1.00824	0.987953	0.992789	1.00452	0.998067	0.974298	1.01725	0.987556
1421	0.9969	0.984382	0.986023	0.999537	1.0126	0.968238	1.0295	0.996336
1422	0.987514	0.98326	0.987758	1.00199	1.01289	0.977198	1.01483	1.00407
1423	1.00169	0.982226	0.99649	1.00027	1.01609	0.97808	1.01106	0.996645
1424	1.00204	0.986583	0.99312	1.00152	1.01812	0.976443	1.00778	1.00201
1425	0.993273	0.990786	0.989695	1.00479	1.02175	0.990718	1.00146	0.99505
1426	1.0025	0.988693	0.995951	1.00092	1.02014	0.996952	1.01149	0.994678
1427	1.00169	0.99456	0.989643	0.998485	1.015	0.999447	1.01252	0.999923
1428	1.00172	0.991058	0.993291	0.997421	1.00795	0.996553	1.0007	1.00327
1429	0.995286	0.989486	0.993125	0.99536	0.99974	0.992999	0.995784	1.00756
1430	0.988819	0.98535	0.997107	0.996309	1.00401	0.986413	1.01117	1.00371
1431	0.995438	0.988865	0.997588	0.997371	1.00786	0.985037	1.00902	1.00739
1432	0.997235	0.988129	0.989485	0.996707	0.999458	0.983946	1.01155	1.00023
1433	1.00447	0.986864	0.990904	0.995644	0.995024	0.990112	1.00402	1.00068
1434	1.00156	0.9825	1.00545	0.996691	1.00154	0.992667	1.00164	0.997234
1435	0.996284	0.986313	1.00708	0.996402	0.992566	0.990504	0.995888	1.00321
1436	0.9969	0.983578	0.999615	0.995913	0.990495	0.987532	0.999274	1.00715
1437	1.00331	0.981415	0.999344	0.995605	0.986275	0.987448	1.00534	1.00909
1438	0.994708	0.988627	0.995328	0.992164	0.983638	0.976187	1.01527	1.00872
1439	1.00102	0.992324	0.996739	0.991432	0.982167	0.964273	1.01158	0.994255
1440	0.990629	0.991747	0.989756	0.990267	0.980768	0.968073	1.00104	0.994458
1441	1.00264	0.983702	0.981794	0.996404	0.979366	0.959871	0.989333	0.996929
1442	0.996619	0.986169	0.986554	0.992614	0.978402	0.958856	0.985217	0.990276
1443	1.00433	0.989616	0.991835	0.994952	0.98226	0.96703	0.978462	0.987566
1444	0.995995	0.993945	0.997451	0.997109	0.980393	0.967468	0.985106	0.99601
1445	0.995025	0.999015	0.991564	1.0013	0.978111	0.974621	0.983183	1.00746
1446	0.987205	1.00475	0.990281	1.00031	0.974514	0.982403	0.973508	1.00152
1447	1.00739	1.01199	0.992579	0.997926	0.974751	0.990736	0.977643	0.99474
1448	0.99593	1.01382	0.990234	1.00198	0.975927	1.00486	0.97871	0.994815
1449	1.00022	0.995861	1.00212	1.00202	0.97091	0.998011	0.976071	0.9988
1450	0.985516	0.990582	0.993501	0.997767	0.968653	0.990603	0.980995	0.996126
1451	1.01014	0.988284	1.00011	0.999845	0.967534	0.989983	0.986245	1.0025
1452	0.987116	0.986133	0.987088	0.999295	0.978074	0.986523	0.980079	1.00281
1453	0.991491	0.983457	0.988928	0.997625	0.9834	0.993215	0.975701	0.988035
1454	0.994011	0.980023	0.989966	1.0008	0.981087	0.999364	0.967857	0.987209
1455	0.987319	0.973392	0.998353	1.00141	0.975607	0.996137	0.976396	0.991268
1456	0.998589	0.978995	0.997714	1.00337	0.974574	0.976733	0.97963	1.0038
1457	1.00466	0.974219	0.991204	0.998996	0.972974	0.959621	0.974734	1.00919
1458	1.00225	0.978682	0.993472	1.00002	0.9763	0.960924	0.98485	1.00481
1459	0.987096	0.979929	0.984302	1.00251	0.976859	0.970533	0.988538	1.00161
1460	0.980685	0.976923	0.997678	0.998919	0.976156	0.962617	0.992268	0.993388
1461	1.00821	0.982937	0.999967	0.998572	0.975228	0.96779	0.991161	0.995819
1462	1.00196	0.981037	0.999877	0.996757	0.981568	0.969859	0.999142	1.00403
1463	1.00108	0.985409	0.997286	1.00365	0.981799	0.975312	0.992641	1.00323
1464	0.993293	0.988677	0.989057	1.00016	0.983944	0.976962	0.981875	1.00753
1465	0.996416	0.991318	0.998329	1.00314	0.988948	0.97037	0.978663	1.00033
1466	1.00514	0.988597	0.993209	1.00499	0.990509	0.975869	0.987531	0.999423
1467	0.997648	0.995434	0.995386	1.0012	0.986896	0.976703	0.989597	0.987909
1468	0.985037	0.991484	0.995341	1.00105	0.988715	0.97278	0.997639	0.989736
1469	0.988079	0.99407	0.982409	1.0009	0.992499	0.970976	0.993782	0.989489
1470	0.990774	0.991736	0.989927	0.995011	0.99086	0.9688	0.98309	0.982205
1471	0.99816	0.996341	0.994171	0.998525	0.985953	0.969158	0.982417	0.983655
1472	1.00793	1.01033	1.00111	0.995575	0.977609	0.973222	0.987434	0.986971
1473	0.993425	1.01458	1.0042	0.996872	0.973785	0.973675	0.987735	0.987923
1474	0.995656	1.01222	0.995717	0.996729	0.973779	0.979804	0.99827	0.990759
1475	0.998429	1.01562	0.990549	0.997879	0.96668	0.98274	1.00083	0.985267
1476	1.00368	1.00765	0.996542	0.998635	0.968469	0.987506	0.9977	0.985452
1477	0.995367	1.00873	0.996311	0.99982	0.970523	0.984216	1.00309	0.99258
1478	1.00122	1.01268	0.997383	0.999282	0.972493	0.98426	0.995166	0.988535
1479	0.994865	1.00735	1.00158	1.00028	0.975545	0.986125	0.993106	0.983361
1480	0.997828	1.01509	0.983763	1.00258	0.978212	0.976598	0.997763	0.982884
1481	0.996089	1.00923	0.98386	1.00466	0.975377	0.959524	1.00964	0.986971
1482	0.998401	1.00218	1.0005	1.00351	0.977156	0.950276	1.00816	0.99119
1483	0.987666	1.00765	1.00461	1.00169	0.978569	0.955674	1.01139	0.988585
1484	0.996685	1.00233	0.990302	1.00248	0.979233	0.957915	1.01322	0.988678
1485	0.991651	0.991197	0.986667	1.00577	0.980987	0.966037	1.00611	0.995323
1486	0.991788	0.99106	0.984835	1.0035	0.982139	0.967978	0.997277	1.00272
1487	0.992186	0.985969	0.983266	1.0107	0.976386	0.978968	1.00582	0.998777
1488	1.00343	0.99244	0.993322	1.00654	0.976375	0.974371	1.01352	1.00238
1489	1.0049	0.999211	1.0108	1.00271	0.972929	0.979584	1.00725	1.00733
1490	1.00842	1.0055	0.998324	1.0051	0.971848	0.985319	1.01175	1.00361
1491	0.998764	1.00313	0.999029	1.00677	0.973181	0.992536	1.00977	0.998997
1492	1.00217	0.991258	0.99568	1.005	0.982486	0.999747	0.999697	0.99697
1493	0.996163	0.984762	0.987908	1.00255	0.980712	0.995359	0.991608	0.997375
1494	1.01365	0.983825	0.991543	1.00079	0.973995	0.990508	1.00283	0.992166
1495	1.00784	0.990505	0.982178	0.999997	0.976457	0.988255	1.00078	0.994795
1496	0.990188	0.987341	0.987133	1.00456	0.979869	0.982065	1.00621	0.99674
1497	0.996163	0.983688	0.997948	1.00392	0.971637	0.991783	1.00575	0.989865
1498	0.992099	0.976763	0.982118	1.0065	0.973804	0.995666	1.00694	0.995153
1499	0.98067	0.967709	0.995275	1.00354	0.972306	0.992524	1.00799	0.988714
1500	0.991113	0.965502	0.996093	1.00207	0.979845	0.993643	1.00045	0.992873
1501	0.979258	0.968323	1.00178	1.00109	0.985397	0.976051	0.990923	0.993587
1502	0.990404	0.972741	0.995822	1.00176	0.985549	0.98039	0.991581	0.991931
1503	0.984213	0.970207	0.98974	1.00198	0.983424	0.97923	0.993325	1.00066
1504	0.990317	0.975615	0.99327	1.00566	0.981465	0.977712	1.00126	1.0039
1505	0.985988	0.970192	0.99511	0.999162	0.980426	0.97962	0.997658	0.998327
1506	1.00267	0.969967	0.994171	1.00207	0.980493	0.98386	0.994818	0.995481
1507	0.992817	0.972281	0.989942	1.00233	0.971671	0.985913	0.995523	0.997184
1508	0.989681	0.96778	0.998797	1.00239	0.976651	0.993257	0.990387	0.993875
1509	0.999993	0.969273	1.00226	0.998543	0.974686	0.999465	0.996965	0.985396
1510	0.993222	0.973224	0.983716	0.997584	0.97641	1.00128	0.986055	0.989522
1511	0.988883	0.976693	0.981847	0.995091	0.982124	1.00643	0.98928	0.988836
1512	0.988224	0.97873	0.989138	0.995311	0.990246	0.996709	0.999473	0.991776
1513	0.988964	0.973864	0.986675	0.998803	0.985084	0.989586	1.011	0.998742
1514	0.974507	0.979583	0.991596	1.00392	0.987966	1.00081	1.00912	0.995552
1515	0.994685	0.98188	0.988494	1.0029	0.990743	1.01024	1.00422	0.999184
1516	0.996026	0.987166	0.989808	1.00418	0.986155	1.01773	1.00099	0.997076
1517	0.978056	0.981064	0.985556	0.999738	0.989064	1.02408	0.996125	1.0004
1518	0.992794	0.981363	0.986857	1.00223	0.99438	1.02698	0.990995	0.9999
1519	0.989623	0.986722	0.984055	1.00277	0.998624	1.02413	0.986115	0.995448
1520	0.982393	0.990293	0.988357	1.00222	1.00431	1.01785	0.981217	0.997469
1521	0.994642	0.992452	0.988936	1.00305	1.00226	1.01961	0.981936	0.998145
1522	0.995359	0.988502	0.98308	1.00257	1.00211	1.02593	0.978784	0.996315
1523	0.978071	0.979918	0.98268	1.00711	1.00519	1.02695	0.97321	1.00141
1524	0.990601	0.980992	0.990423	1.00874	1.00962	1.04136	0.960386	0.99539
1525	0.984495	0.981834	0.991706	1.00338	1.01494	1.04073	0.954233	0.992394
1526	0.997445	0.983354	0.998038	1.0036	1.01406	1.03812	0.9592	0.997838
1527	0.974885	0.985833	0.995296	1.00005	1.01719	1.04503	0.96883	1.00356
1528	0.999326	0.98458	0.976312	0.997785	1.01296	1.05607	0.971892	1.00101
1529	0.982642	0.987833	0.974164	0.99663	1.01431	1.05713	0.974349	0.993902
1530	0.973131	0.981953	0.996169	0.998805	1.01669	1.05541	0.973191	0.997197
1531	0.982061	0.985436	0.986623	0.996817	1.01272	1.06594	0.975117	0.989151
1532	0.991912	0.9847	0.989057	0.994369	1.01761	1.06454	0.982641	0.984871
1533	0.984421	0.984628	0.978972	0.995993	1.019	1.07338	0.977852	0.983629
1534	0.988594	0.983092	0.997961	0.999375	1.0179	1.06034	0.979999	0.992948
1535	0.990158	0.980787	0.978932	0.997127	1.0191	1.06129	0.974885	0.996933
1536	0.993265	0.981998	0.998548	0.999037	1.02752	1.06137	0.973091	0.995813
1537	0.983496	0.984681	0.981823	1.00112	1.02712	1.06207	0.979899	0.991361
1538	0.982112	0.98879	0.985745	1.00434	1.02568	1.04002	0.990987	0.992558
1539	0.9869	0.987443	0.977184	1.0004	1.01327	1.01317	0.995161	0.992043
1540	0.988066	0.988782	0.991895	1.00197	1.00344	1.00219	0.997988	0.992782
1541	0.994054	0.989042	0.987908	1.00128	1.00622	0.994252	1.00175	0.983031
1542	0.985349	0.991741	0.997168	1.0006	1.01196	0.987484	0.996913	0.990825
1543	0.995671	1.00067	0.985309	1.00003	1.00448	0.983952	1.00484	0.988413
1544	0.990905	1.00015	0.986804	0.999109	1.00321	0.976768	1.00229	0.990923
1545	0.987319	1.01322	0.992878	1.00209	1.00285	0.978258	0.99882	0.99869
1546	0.995329	1.01435	0.984722	0.998544	0.999329	0.981542	0.986752	0.998628
1547	0.9938	1.00269	0.980772	1.00277	0.997841	0.987657	0.99515	1.00175
1548	0.990251	1.01239	0.984084	0.998647	1.00293	0.987071	1.00507	1.00131
1549	0.996213	1.01268	1.00173	1.00077	1.00549	0.982844	1.01181	1.00488
1550	1.00319	1.00838	0.991301	1.0012	0.999862	0.984741	1.0072	1.00183
1551	0.99176	0.999816	0.997609	0.998939	0.985587	0.981777	0.995679	0.993851
1552	1.00415	0.996482	0.996122	1.00043	0.980033	0.97212	0.996817	1.00106
1553	0.994482	0.993056	0.989545	1.00226	0.984796	0.968264	0.991967	1.00259
1554	0.999372	0.985848	0.989619	1.00205	0.98073	0.965328	0.986332	0.996016
1555	0.994251	0.987655	0.970327	0.995532	0.977131	0.974794	0.982871	0.993217
1556	0.979701	0.982594	0.977048	0.997424	0.97932	0.972323	0.982514	0.987131
1557	1.00798	0.98077	0.990544	0.996381	0.971104	0.978291	0.979276	0.998554
1558	1.00618	0.988325	0.982696	0.994785	0.972163	0.982766	0.98652	0.999091
1559	1.00373	0.986835	0.992247	0.996895	0.971265	0.979538	0.985531	0.99919
1560	0.990723	0.987303	0.973189	1.00028	0.972182	0.974959	0.99184	1.00653
1561	0.992411	0.981843	0.97919	1.00249	0.96705	0.983785	0.983709	1.00541
1562	0.993301	0.98304	0.988171	1.00115	0.978038	0.982613	0.975905	1.00746
1563	0.984807	0.987201	0.983965	1.00281	0.972895	0.989977	0.990617	1.00201
1564	0.9932	0.974391	0.993441	1.00481	0.973192	0.980561	0.989122	1.00452
1565	1.00918	0.974632	0.989267	1.00211	0.978824	0.986846	0.992102	1.00094
1566	0.992817	0.984598	0.985503	1.00263	0.981354	0.988835	0.990842	0.99675
1567	0.996931	0.981818	0.983395	1.00386	0.979941	0.988184	1.00291	0.995354
1568	1.00015	0.985614	0.984055	1.00281	0.973793	0.975466	1.00183	0.994025
1569	0.998951	0.974163	0.999465	1.0039	0.972469	0.980261	0.999597	0.993353
1570	0.999985	0.974627	0.993383	1.00122	0.968839	0.986894	1.00297	0.998707
1571	1.0011	0.970157	0.98437	1.00249	0.969465	0.982388	0.995552	0.995064
1572	0.98616	0.973588	0.985498	1.0032	0.972089	0.976041	0.998566	0.989894
1573	0.995772	0.966684	0.995596	0.999439	0.967519	0.987552	0.986068	0.991724
1574	0.997395	0.971292	1.00637	0.995585	0.965289	0.992808	0.985064	0.984539
1575	0.993293	0.970354	0.997068	0.997898	0.967901	0.981862	0.987711	0.995823
1576	0.991281	0.981233	0.997286	0.99524	0.964495	0.97483	1.00139	0.989183
1577	0.993344	0.964982	0.993546	0.994673	0.963489	0.971953	1.00335	0.991915
1578	0.995777	0.959688	0.986157	1.00061	0.96699	0.982227	0.997951	0.992913
1579	0.991861	0.968607	0.98847	0.999735	0.968396	0.990827	1.01033	0.991833
1580	0.996018	0.976591	0.997128	1.00065	0.969514	0.995422	1.01338	0.986456
1581	0.995316	0.986136	0.991091	1.00061	0.966123	0.98656	1.00546	0.985894
1582	0.983301	0.989576	0.981321	1.00168	0.963952	0.990339	1.00283	0.993856
1583	0.992236	0.986939	0.994771	0.999059	0.961917	0.993736	1.00196	1.00082
1584	1.00215	0.981547	0.984378	1.00087	0.962662	0.995647	0.999216	0.999844
1585	0.994657	0.970805	0.989493	1.0002	0.958471	1.00307	0.990736	0.997083
1586	0.991752	0.974269	0.977957	0.997163	0.961811	1.00606	0.997095	0.997167
1587	0.996639	0.985393	0.989461	0.996862	0.962579	1.00198	0.995248	0.996213
1588	1.00873	0.993078	0.984835	0.995388	0.967307	1.00139	0.994691	0.99697
1589	0.982845	1.00119	0.980961	0.995389	0.963992	1.01069	0.99184	0.992707
1590	0.988016	0.990562	0.982013	0.999232	0.966774	1.00388	0.989291	0.994579
1591	0.999205	0.982062	0.986029	0.996318	0.965482	0.997415	0.985114	0.995835
1592	1.01033	0.979395	0.980083	0.993024	0.962591	0.994352	0.97204	0.995041
1593	0.999053	0.988177	0.982559	0.995825	0.962198	1.00298	0.972063	0.987892
1594	0.981344	0.991015	0.976409	0.99536	0.965945	0.998346	0.977286	0.993375
1595	1.00201	0.983128	0.965814	0.994348	0.97846	0.988841	0.987708	0.987164
1596	0.983808	0.980865	0.986081	0.999124	0.975654	0.989836	0.995433	0.990222
1597	0.997937	0.976819	0.977108	0.993831	0.966857	0.984399	1.00283	0.996114
1598	0.987914	0.986097	0.984394	0.999376	0.968786	0.980353	1.00959	0.991471
1599	0.987108	0.978118	0.97617	1.00033	0.964275	0.974444	1.00304	0.987023
1600	0.993141	0.982364	0.983926	0.997108	0.963105	0.978739	0.997272	0.986998
1601	0.994525	0.984586	0.988042	1.00102	0.966139	0.975591	0.995032	0.989618
1602	0.990855	0.9858	0.990371	1.0035	0.966872	0.976415	0.996249	0.988239
1603	0.983227	0.977972	0.975983	0.999314	0.964389	0.981906	0.996078	0.991203
1604	1.00105	0.980707	0.976417	0.996716	0.966916	0.974164	0.998669	0.985278
1605	0.989303	0.98149	0.975854	0.99761	0.970731	0.968175	0.989423	0.987971
1606	0.992743	0.972085	0.984925	0.998977	0.968227	0.972368	0.981067	0.990688
1607	0.989978	0.974929	0.982126	0.998772	0.969479	0.980527	0.98084	0.996369
1608	1.00047	0.977854	0.985393	0.997205	0.964463	0.995706	0.977223	0.991278
1609	0.990847	0.988933	0.982741	0.995493	0.966589	0.997679	0.97665	0.989319
1610	0.991425	0.984926	0.984843	0.998805	0.964616	0.991292	0.986216	0.986212
1611	0.982452	0.977901	0.983671	0.998726	0.970784	1.00046	0.985299	0.991477
1612	1.00165	0.978497	0.990807	0.994922	0.97349	0.999123	0.977262	0.993894
1613	0.998885	0.981945	0.99107	0.992687	0.974029	0.993607	0.971086	0.994381
1614	0.991542	0.97975	0.98769	0.994445	0.976848	1.00251	0.964965	0.991989
1615	0.981894	0.980444	0.991617	0.992651	0.97701	0.996874	0.975186	0.992759
1616	0.994011	0.98235	0.991467	0.996092	0.975293	0.994916	0.978763	0.992141
1617	0.980946	0.987025	0.992547	0.995931	0.978078	0.995553	0.978538	0.984925
1618	0.999103	0.987741	0.992142	0.998595	0.971638	0.991058	0.987014	0.984508
1619	0.983314	0.984613	0.972317	1.00048	0.972586	0.993482	0.979981	0.988085
1620	0.991636	0.985849	0.986502	1.00239	0.968303	0.98639	0.981579	0.98239
1621	0.983734	0.988948	0.989356	0.996313	0.973176	0.986771	0.980443	0.984404
1622	0.979207	0.98628	0.987921	0.996932	0.974027	0.986207	0.984731	0.987778
1623	0.977412	0.995193	0.988208	1.00107	0.972786	0.981985	0.987893	0.994352
1624	0.983025	0.988674	0.990242	0.995896	0.967514	0.986399	0.987743	0.986139
1625	0.990804	0.985546	0.983432	0.998799	0.971116	0.98605	0.988229	0.9895
1626	0.968599	0.981789	0.989425	0.994077	0.970123	0.982599	0.994913	0.989244
1627	0.990087	0.984847	0.98401	1.00065	0.978809	0.985764	1.00676	0.991274
1628	0.984155	0.976139	0.978249	1.00073	0.973141	0.986231	1.00979	0.991458
1629	0.975384	0.976414	0.987929	1.00199	0.974018	0.98271	1.00008	0.9939
1630	0.99215	0.983222	0.987997	1.00135	0.978766	0.987701	0.992963	0.992064
1631	0.985263	0.979614	0.973578	0.997697	0.981874	0.985794	0.981746	0.995027
1632	0.995418	0.979537	0.983251	0.997957	0.981659	0.99341	0.9789	0.994041
1633	0.991752	0.983896	0.972401	0.995419	0.973734	0.992871	0.978002	0.990649
1634	0.994482	0.985471	0.983408	0.998533	0.974585	0.994802	0.984076	0.986489
1635	0.993344	0.988581	0.992841	1.00053	0.975714	0.992943	0.998828	0.989357
1636	0.982381	0.984396	0.980646	1.0003	0.968195	0.995756	1.00427	0.985468
1637	0.987739	0.976326	0.979489	1.00064	0.97172	0.99188	1.00355	0.987074
1638	0.986292	0.981384	1.00387	0.996525	0.969625	0.988759	1.00435	0.982353
1639	0.986812	0.981698	0.986586	0.994143	0.976017	0.981697	1.00639	0.977587
1640	0.986487	0.966933	0.987067	0.997462	0.980566	0.980384	1.00116	0.976844
1641	0.98903	0.969015	0.983837	0.99679	0.985218	0.982474	0.990044	0.974801
1642	0.98958	0.962642	0.986097	0.994873	0.985542	0.969895	0.984108	0.979132
1643	1.0006	0.976094	0.991249	0.998261	0.983938	0.971904	0.978837	0.980079
1644	1.00635	0.974128	0.984341	1.00001	0.981026	0.97277	0.978887	0.98412
1645	1.00384	0.966	0.974277	0.995465	0.977715	0.976747	0.981748	0.990912
1646	0.992381	0.976814	0.970958	0.99683	0.979455	0.983281	0.986509	0.987695
1647	0.990601	0.980951	0.983237	1.00052	0.978372	0.986405	0.976798	0.989313
1648	0.987182	0.982873	0.976606	0.996807	0.974939	0.998728	0.987423	0.992844
1649	0.983656	0.985621	0.988951	0.996729	0.974477	1.00403	0.985896	0.994284
1650	0.980974	0.981086	0.989643	0.995853	0.973348	1.01219	0.977527	0.991209
1651	0.988543	0.978097	0.995567	0.99431	0.97221	1.02222	0.973965	0.993668
1652	0.992969	0.971455	0.978564	0.996572	0.98005	1.00808	0.97629	1.00014
1653	1.00016	0.97604	0.987059	0.998678	0.988545	0.992704	0.985236	1.00147
1654	0.988616	0.979298	0.987343	0.997711	0.990301	0.993974	0.988078	1.00274
1655	0.990695	0.985353	0.981006	0.998068	0.988642	0.995681	0.986187	0.997604
1656	0.976832	0.980604	0.992526	0.999205	0.982409	1.00307	0.984731	0.997008
1657	0.987869	0.978727	0.972745	0.998536	0.984508	0.993676	0.991174	1.00602
1658	0.986414	0.981767	0.97786	1.00009	0.979348	0.998132	0.990369	1.00303
1659	0.990239	0.98205	0.976251	0.995569	0.979283	1.01085	0.98895	0.99953
1660	0.995582	0.981665	0.979368	0.997829	0.978924	1.01737	0.987209	0.992771
1661	0.990708	0.984644	0.988891	0.998843	0.982773	1.03405	0.987027	0.989409
1662	0.994627	0.985548	0.974735	0.995853	0.988542	1.04107	0.987154	0.985444
1663	0.993998	0.990701	0.985563	0.997839	0.98615	1.04227	0.979244	0.980128
1664	0.977455	0.995198	0.9834	0.993036	0.991436	1.04816	0.976142	0.991149
1665	0.993815	0.990999	0.974248	0.995835	0.99627	1.0527	0.986786	0.993041
1666	0.990404	0.988322	0.981855	0.997917	1.00425	1.06616	0.987243	0.99097
1667	0.989521	0.983453	0.977318	1.00214	1.00427	1.06257	0.986469	0.980994
1668	0.990246	0.985196	0.977355	1.00263	1.00578	1.06159	0.985912	0.984998
1669	0.993694	0.987494	0.986893	0.998743	1.01109	1.05868	0.976988	0.986166
1670	0.979846	0.994781	0.970808	0.996636	1.00913	1.03046	0.97252	0.988925
1671	0.988239	0.997413	0.986675	0.996951	1.01292	1.02655	0.977799	0.992363
1672	0.985552	0.995442	0.983214	0.997445	0.997161	1.01529	0.967052	0.993524
1673	0.989217	0.998867	0.983521	0.993881	0.999558	1.01257	0.965887	0.990199
1674	0.988855	0.992311	0.992736	0.996712	0.99518	1.01413	0.973424	0.983475
1675	0.981063	0.996254	0.985571	0.992829	0.995122	1.02226	0.972555	0.982371
1676	0.979296	0.995083	0.980698	1.00108	0.989436	1.02423	0.971411	0.985919
1677	0.988804	0.986562	0.993764	1.00244	0.992055	1.02355	0.974597	0.986894
1678	0.981937	0.985454	0.983243	0.999496	0.991901	1.03632	0.977215	0.983865
1679	0.985524	0.984586	0.995785	0.996142	0.994482	1.04201	0.989349	0.990029
1680	0.988761	0.983973	0.983881	0.997712	0.991028	1.04479	0.989891	0.98894
1681	0.97668	0.978127	0.987448	0.996073	0.983699	1.04571	0.984348	0.989547
1682	0.990781	0.980209	0.993929	0.997758	0.98943	1.03909	0.975146	0.988539
1683	0.988624	0.983433	0.991204	0.997142	0.98704	1.03928	0.963784	0.984246
1684	0.977144	0.989069	0.98099	1.00326	0.989954	1.03003	0.965424	0.985471
1685	0.98451	0.988098	0.987593	0.998324	0.985274	1.02906	0.965422	0.9785
1686	0.980403	0.990516	0.979715	1.00327	0.988934	1.03081	0.968074	0.980091
1687	0.980011	0.985331	0.982869	0.997167	0.988244	1.01713	0.971083	0.985695
1688	0.989319	0.976643	0.987961	0.998317	0.99075	1.01484	0.976414	0.989131
1689	0.98508	0.978378	0.984859	0.993231	0.984581	1.00341	0.988794	0.986695
1690	0.98382	0.978365	0.992218	0.991051	0.983872	0.983294	0.998495	0.992215
1691	0.986312	0.962674	0.983905	0.99251	0.98115	0.968191	0.994918	0.99273
1692	0.975521	0.957463	0.976146	0.99346	0.980138	0.965722	1.00303	0.983568
1693	0.98325	0.955604	0.988231	0.995323	0.973668	0.96925	1.0075	0.980411
1694	0.984234	0.960892	0.9794	0.994052	0.980814	0.965598	1.00936	0.985705
1695	0.991729	0.959017	0.975013	0.994186	0.974709	0.959609	0.999052	0.986848
1696	0.989701	0.959428	0.979445	0.994908	0.974234	0.961741	0.988329	0.987049
1697	0.981395	0.961104	0.989327	0.996119	0.97255	0.956935	0.978081	0.980089
1698	0.98745	0.959363	0.976898	1.00158	0.971738	0.960034	0.982948	0.979531
1699	0.988	0.95512	0.979037	0.997192	0.964858	0.962805	0.976071	0.981874
1700	0.991499	0.960938	0.98226	0.998524	0.966779	0.964515	0.981022	0.974861
1701	0.991745	0.963919	0.972887	0.999814	0.962328	0.963878	0.988099	0.97768
1702	0.985559	0.959144	0.980299	1.00149	0.957909	0.957366	0.98187	0.980168
1703	0.984959	0.957814	0.986675	0.999777	0.963056	0.960654	0.981064	0.978052
1704	0.992852	0.965157	1.0131	1.00711	0.954798	0.960219	0.976488	0.977622
1705	0.995511	0.962746	0.987419	1.00223	0.956701	0.959339	0.976784	0.976448
1706	0.99816	0.963653	0.988321	1.0017	0.960982	0.961913	0.968626	0.980558
1707	0.991012	0.967427	0.991543	0.994675	0.964466	0.957864	0.971234	0.988691
1708	1.00049	0.973265	0.981058	0.996962	0.959806	0.955826	0.98951	0.991948
1709	0.985777	0.974012	0.976004	0.995524	0.964328	0.958447	0.984382	0.993915
1710	0.99378	0.97112	0.967678	0.99444	0.969482	0.962851	0.977941	0.995809
1711	0.993795	0.977194	0.97644	0.993112	0.970096	0.952745	0.988585	1.00028
1712	0.990376	0.977884	0.970214	0.996426	0.970335	0.952326	0.984039	0.998435
1713	1.00471	0.983112	0.978414	0.9951	0.967444	0.954205	0.986411	0.987908
1714	0.98309	0.9852	0.97475	0.990813	0.969802	0.952328	0.982892	0.997726
1715	1.00115	0.98034	0.964148	0.990196	0.961128	0.954366	0.98089	0.987029
1716	1.00602	0.981367	0.978099	0.991968	0.959997	0.952372	0.980058	0.991458
1717	0.995091	0.981614	0.966994	0.995026	0.955548	0.962841	0.979939	0.985539
1718	0.989065	0.978986	0.970516	0.992223	0.95922	0.9559	0.97834	0.99273
1719	0.977354	0.976385	0.974564	0.991445	0.960228	0.953969	0.980533	0.992163
1720	0.984206	0.970277	0.969065	0.993554	0.962905	0.946389	0.972512	0.995188
1721	0.997509	0.978077	0.959062	0.997332	0.961773	0.944425	0.969334	0.996531
1722	0.988464	0.984419	0.962526	0.995032	0.965161	0.942608	0.968906	0.991487
1723	0.9776	0.986514	0.969373	0.988536	0.97395	0.943053	0.964996	0.986917
1724	0.97508	0.97724	0.965927	0.991636	0.969338	0.944259	0.969374	0.980894
1725	0.986044	0.966741	0.959469	0.990634	0.97157	0.950733	0.972082	0.989027
1726	0.989853	0.972216	0.957088	0.993515	0.972599	0.9482	0.978945	0.994306
1727	0.989194	0.967843	0.972535	0.99426	0.972909	0.950069	0.976895	0.994014
1728	0.992173	0.967102	0.970319	0.994024	0.964301	0.953768	0.979233	0.985896
1729	0.982931	0.970719	0.955203	0.992685	0.960553	0.943669	0.980279	0.983469
1730	0.984741	0.968369	0.966902	0.996293	0.961162	0.94788	0.972932	0.985656
1731	0.977433	0.973887	0.973775	0.998931	0.96199	0.942884	0.969744	0.988624
1732	0.981613	0.979672	0.962006	0.99685	0.967126	0.939717	0.975096	0.985995
1733	0.979245	0.978671	0.970411	1.00244	0.967538	0.947837	0.985703	0.983332
1734	0.987884	0.972769	0.964492	0.996922	0.972217	0.954953	0.974475	0.978037
1735	0.984125	0.972852	0.957448	0.996616	0.973347	0.960969	0.984068	0.975625
1736	0.985524	0.969911	0.95554	0.994564	0.969704	0.956003	0.985819	0.974357
1737	0.987225	0.973063	0.968818	0.998481	0.975697	0.966908	0.98517	0.974938
1738	0.983676	0.973564	0.962224	0.994236	0.970831	0.978213	0.979659	0.971852
1739	0.984016	0.967293	0.973925	0.991767	0.972095	0.977772	0.973471	0.977363
1740	0.984776	0.969742	0.963388	0.990325	0.974175	0.973227	0.964727	0.982726
1741	0.983554	0.972753	0.953918	0.991104	0.970939	0.967295	0.973556	0.987275
1742	0.989035	0.974743	0.954904	0.994154	0.972494	0.963753	0.967776	0.985384
1743	0.995879	0.977884	0.966206	0.994364	0.972474	0.963294	0.973244	0.979205
1744	0.983017	0.978308	0.960865	0.994824	0.976578	0.957398	0.977521	0.981114
1745	0.986371	0.976585	0.971386	0.99327	0.972146	0.957642	0.982956	0.98823
1746	0.982736	0.973303	0.958273	0.988131	0.970502	0.958518	0.992453	0.983264
1747	0.976289	0.976805	0.964545	0.994771	0.969835	0.95744	0.990398	0.99002
1748	0.991339	0.97872	0.958131	0.996032	0.973353	0.960461	0.993198	0.981328
1749	0.996003	0.982103	0.960791	0.993703	0.979244	0.963296	0.99812	0.982216
1750	0.982895	0.978783	0.955684	0.996422	0.983881	0.957916	0.989793	0.987369
1751	0.991767	0.982518	0.961722	0.997172	0.987298	0.968574	0.993003	0.988498
1752	0.985805	0.979554	0.965446	0.993306	0.984647	0.964531	0.993454	0.985847
1753	0.98067	0.986047	0.969028	0.993923	0.984696	0.96061	0.992712	0.985517
1754	0.993035	0.993019	0.952612	0.996851	0.981061	0.965999	0.995095	0.986865
1755	0.995438	0.990193	0.961099	0.99433	0.980106	0.973054	0.997938	0.993046
1756	0.990028	0.992748	0.95642	0.995318	0.984741	0.979399	0.997348	0.997668
1757	0.981126	1.00391	0.952846	0.997484	0.991966	0.972827	0.994273	0.998844
1758	0.974898	0.998061	0.962736	0.995991	0.997344	0.963228	0.996619	0.99922
1759	0.979896	0.999758	0.961172	0.993449	1.0019	0.9629	0.993634	0.99734
1760	0.979643	0.989981	0.959777	0.995817	1.006	0.967003	0.999977	0.989589
1761	0.979752	0.992121	0.959874	0.997617	0.992797	0.961297	0.989042	0.983765
1762	0.965765	0.982119	0.966093	0.994564	0.991591	0.960825	0.994403	0.988109
1763	0.976434	0.973135	0.947048	0.994216	0.986433	0.964776	0.989093	0.984649
1764	0.980895	0.977815	0.955818	0.995585	0.991331	0.963725	0.981439	0.979295
1765	0.986812	0.975214	0.956991	0.996221	0.988406	0.958518	0.976613	0.973809
1766	0.978789	0.973455	0.949195	1.00012	0.986836	0.959229	0.960048	0.982319
1767	0.981063	0.97413	0.961527	0.997484	0.989153	0.963866	0.965839	0.988109
1768	0.991912	0.971285	0.950719	0.999864	0.988976	0.964537	0.962687	0.988612
1769	0.983757	0.971554	0.955119	0.996534	0.992296	0.961464	0.96422	0.988284
1770	0.972211	0.970163	0.954707	0.99598	0.991384	0.957307	0.963417	0.987373
1771	0.975139	0.966201	0.957734	0.997031	0.996952	0.964655	0.972983	0.982265
1772	0.975993	0.965879	0.961151	0.996947	0.985003	0.982136	0.971786	0.983811
1773	0.97216	0.970808	0.962487	0.993975	0.986986	0.996487	0.977622	0.986197
1774	0.993433	0.973766	0.962413	0.996364	0.997709	1.00116	0.982034	0.983738
1775	0.985988	0.967944	0.970035	0.995772	1.00313	1.00034	0.979455	0.982129
1776	0.979663	0.970164	0.955984	0.998314	1.00075	1.00508	0.9787	0.985271
1777	0.98508	0.966343	0.957853	1.00126	0.996578	0.997784	0.986147	0.978336
1778	0.983212	0.970263	0.984026	1.00163	0.995797	1.00571	0.995623	0.98589
1779	0.992201	0.975877	0.966077	0.998654	1.00131	1.00994	0.985328	0.992499
1780	0.982662	0.980987	0.963456	0.999813	0.988328	1.00854	0.992538	0.995321
1781	0.976208	0.974219	0.973623	1.00298	0.988132	1.0018	0.992202	0.997711
1782	0.985415	0.97046	0.963651	0.9989	0.984339	0.993414	0.991211	0.99505
1783	0.986457	0.970996	0.966558	0.998573	0.984824	0.993118	0.990823	0.992945
1784	0.992657	0.973665	0.961067	0.997693	0.977591	0.983124	0.995898	0.995056
1785	0.977628	0.969158	0.963472	0.994622	0.976028	0.973508	0.998799	0.997052
1786	0.97891	0.963885	0.960258	0.998935	0.978259	0.974782	0.989436	0.997753
1787	0.975362	0.964569	0.96179	0.995286	0.981361	0.978338	0.992239	0.995247
1788	0.979144	0.968041	0.962899	0.997711	0.97683	0.973781	0.989777	0.994743
1789	0.977303	0.972184	0.94981	0.99998	0.980362	0.971234	0.982411	0.997138
1790	0.984467	0.971753	0.96266	1.00131	0.982088	0.981345	0.990268	0.992566
1791	0.972429	0.967004	0.962968	0.997888	0.98192	0.985734	0.996305	0.986629
1792	0.981706	0.9673	0.972566	0.996935	0.978381	0.984349	0.999412	0.987243
1793	0.98721	0.967314	0.97065	0.997602	0.981162	0.986974	0.999256	0.985278
1794	0.980338	0.974909	0.955316	0.999712	0.982006	0.98216	0.996345	0.987908
1795	0.978028	0.980098	0.962931	0.998321	0.975139	0.985686	0.992984	0.991875
1796	0.987065	0.980603	0.966926	0.997394	0.971089	0.982689	0.977286	0.989197
1797	0.972269	0.982108	0.981697	0.994613	0.969283	0.984939	0.964473	1.0015
1798	0.980903	0.978563	0.963104	0.991799	0.965271	0.999306	0.967789	1.00651
1799	0.976609	0.978272	0.962563	0.99301	0.967373	0.998202	0.969548	1.00373
1800	0.97164	0.980974	0.965401	0.995535	0.968753	1.00984	0.961129	1.00784
1801	0.984082	0.974681	0.962292	0.998126	0.980511	0.995855	0.96711	1.00209
1802	0.986725	0.973031	0.980917	0.996598	0.9784	1.00684	0.969406	0.992435
1803	0.976391	0.977449	0.970687	0.999737	0.980277	1.01707	0.962772	0.991624
1804	0.994966	0.971055	0.965633	0.99865	0.977032	1.00108	0.959367	0.984639
1805	0.989428	0.967808	0.968713	0.99509	0.978841	0.992141	0.966235	0.982162
1806	0.990274	0.969522	0.973662	0.996189	0.973204	0.997359	0.972314	0.98463
1807	0.978926	0.974701	0.958365	0.993353	0.965238	1.00008	0.972483	0.988491
1808	0.981083	0.976374	0.963065	0.991255	0.970057	1.0004	0.967548	0.987385
1809	0.991151	0.974943	0.961556	0.994771	0.971681	1.0104	0.970066	0.983301
1810	0.977331	0.974702	0.972264	0.991937	0.975511	1.01051	0.972642	0.983504
1811	0.983286	0.976337	0.972624	0.994448	0.978998	1.00746	0.981445	0.984498
1812	0.984885	0.977063	0.962013	0.99738	0.982002	1.0213	0.982322	0.989199
1813	0.976609	0.979404	0.954407	0.993586	0.983068	1.02704	0.978594	0.986269
1814	0.982482	0.981346	0.963081	0.996862	0.977835	1.01994	0.978826	0.98889
1815	0.982097	0.986966	0.970327	0.99702	0.972381	1.00168	0.975989	0.992467
1816	0.977912	0.986814	0.967068	0.996648	0.957974	0.996863	0.974219	0.990016
1817	0.991027	0.98542	0.958491	0.994795	0.967315	0.987665	0.984105	0.997885
1818	0.981461	0.983884	0.964395	0.996439	0.97109	0.983012	0.975271	0.998429
1819	0.977831	0.988202	0.962268	0.996645	0.975169	0.978833	0.973405	1.00289
1820	0.978649	0.986459	0.960197	0.997788	0.970757	0.980474	0.968737	0.9915
1821	0.978338	0.991603	0.966258	0.995386	0.970293	0.97009	0.977241	0.990869
1822	0.978142	0.987826	0.967346	1.00062	0.968766	0.966747	0.987233	0.993415
1823	0.985291	0.988313	0.970379	0.996516	0.970901	0.962076	0.976525	0.987396
1824	0.979744	0.986251	0.961879	0.993692	0.966429	0.968419	0.985397	0.988639
1825	0.980895	0.985161	0.968143	0.993789	0.967853	0.974766	0.993193	0.98823
1826	0.986523	0.985144	0.970755	0.989008	0.973737	0.969583	0.996043	0.988004
1827	0.984046	0.981327	0.96046	0.991747	0.991881	0.960354	0.993956	0.984114
1828	0.983828	0.981614	0.959903	0.995781	0.991346	0.957733	0.98532	0.98711
1829	0.96927	0.991051	0.957614	0.994602	0.989249	0.952588	0.992059	0.991014
1830	0.977144	0.989638	0.966505	0.99497	0.987209	0.960022	1.00342	0.994844
1831	0.969808	0.989116	0.95765	0.995335	0.984488	0.961413	0.999784	0.989599
1832	0.97377	0.985066	0.958373	0.993238	0.978399	0.954184	0.989817	0.991338
1833	0.972406	0.98757	0.959114	0.996901	0.968995	0.95495	0.993148	0.993802
1834	0.965846	0.983543	0.961677	0.999019	0.964831	0.965251	0.98881	0.993168
1835	0.976441	0.977586	0.964702	0.996232	0.96256	0.982943	0.985138	0.989942
1836	0.978107	0.979852	0.958875	0.997206	0.969151	0.988094	0.981994	0.985543
1837	0.972877	0.985291	0.955984	1.00075	0.979071	0.987045	0.986517	0.991651
1838	0.97854	0.976891	0.963372	0.997308	0.982481	0.970948	0.992139	0.990703
1839	0.971863	0.974115	0.967827	0.998111	0.9739	0.963105	0.985624	0.996873
1840	0.981425	0.973333	0.967428	0.997387	0.973286	0.959269	0.987862	0.991885
1841	0.969161	0.973113	0.962781	1.00062	0.971104	0.957704	0.993911	0.983718
1842	0.978216	0.965951	0.966829	0.997764	0.975154	0.953987	0.99589	0.975571
1843	0.98524	0.972894	0.96562	0.998098	0.966764	0.951633	0.992337	0.987236
1844	0.976087	0.964326	0.96767	0.994089	0.976998	0.957549	0.989962	0.985801
1845	0.981917	0.963404	0.965462	0.99466	0.990202	0.955701	0.977965	0.99028
1846	0.976254	0.96659	0.972033	0.990376	0.98389	0.952604	0.976827	0.986539
1847	0.98067	0.968261	0.96803	0.99219	0.977405	0.958779	0.978618	0.986095
1848	0.988999	0.961822	0.982365	0.98932	0.974759	0.964822	0.980552	0.980622
1849	0.985712	0.967969	0.966784	0.988771	0.978866	0.976652	0.979579	0.977425
1850	0.97939	0.972989	0.958326	0.991486	1.00124	0.974311	0.984454	0.974826
1851	0.984097	0.97037	0.964552	0.996699	1.0048	0.980444	0.98345	0.979214
1852	0.993331	0.96561	0.96435	0.996376	0.999691	0.981183	0.982739	0.974033
1853	0.981359	0.959637	0.963845	0.996927	0.999186	0.986385	0.986567	0.980218
1854	0.979983	0.959538	0.96881	0.998004	0.994152	0.990472	0.97968	0.983191
1855	0.978824	0.96243	0.967323	1.00106	1.00425	0.993823	0.980911	0.988228
1856	0.980322	0.968589	0.968345	1.00077	0.988356	0.980569	0.97633	0.984072
1857	0.977767	0.968121	0.966461	1.00023	0.978229	0.97161	0.971627	0.974718
1858	0.987065	0.966852	0.956744	0.998328	0.982967	0.967188	0.970906	0.980939
1859	0.981765	0.975032	0.964681	0.999799	0.976648	0.966637	0.969054	0.976438
1860	0.970604	0.966472	0.973788	0.998581	0.977778	0.976044	0.97061	0.979695
1861	0.974261	0.966879	0.958583	0.996824	0.983454	0.979121	0.97038	0.979616
1862	0.986449	0.96041	0.96507	0.996071	0.999852	0.978499	0.976716	0.977871
1863	0.970893	0.957386	0.970311	0.994256	1.00443	0.982963	0.975638	0.969558
1864	0.978672	0.953506	0.953145	0.991602	0.999107	0.987959	0.97499	0.977261
1865	0.976469	0.95293	0.970492	0.996179	0.990745	0.983783	0.988408	0.982274
1866	0.974117	0.958744	0.969583	0.996314	0.981973	0.988706	0.983542	0.983551
1867	0.970713	0.95753	0.962668	0.997765	0.980828	1.00559	0.984742	0.986315
1868	0.982272	0.958413	0.962531	0.999218	0.987873	1.00111	0.988504	0.982572
1869	0.978388	0.958281	0.954601	1.00172	0.983966	0.994693	0.99985	0.993573
1870	0.98708	0.961274	0.954693	1.00209	0.966989	0.993082	0.988377	0.990363
1871	0.967382	0.963224	0.966016	1.00369	0.964559	0.992269	0.978639	0.984475
1872	0.969851	0.963257	0.948443	0.996161	0.969675	1.00088	0.973891	0.979919
1873	0.968649	0.964022	0.965838	0.996209	0.976847	1.00978	0.984004	0.984524
1874	0.977128	0.968818	0.969667	0.995203	0.976322	1.00686	0.981637	0.987682
1875	0.97818	0.962252	0.965987	0.99357	0.979399	0.999346	0.988427	0.985037
1876	0.977919	0.961878	0.95989	0.996062	0.973762	0.987953	0.986456	0.982245
1877	0.976064	0.956741	0.962931	0.993649	0.975605	0.984377	0.981717	0.979751
1878	0.980467	0.961893	0.971941	0.99785	0.982639	0.993106	0.991027	0.977979
1879	0.987217	0.968425	0.962802	0.996378	0.978996	0.989808	0.979429	0.981556
1880	0.981562	0.964918	0.967835	0.993251	0.966923	0.985331	0.974496	0.989784
1881	0.970604	0.966852	0.956644	0.998432	0.975053	0.993267	0.972932	0.981411
1882	0.964137	0.973057	0.969449	0.998453	0.973081	1.00211	0.974235	0.986939
1883	0.970885	0.974316	0.962211	1.00068	0.968377	0.996658	0.979077	0.998797
1884	0.979425	0.972604	0.963893	0.997524	0.963169	1.00219	0.986068	0.989097
1885	0.97889	0.983798	0.961835	0.996058	0.971722	0.991122	0.973619	0.994483
1886	0.976071	0.978444	0.949623	0.999721	0.977428	0.993539	0.962056	0.994512
1887	0.986343	0.974017	0.961435	1.00194	0.978164	0.999485	0.961234	0.99016
1888	0.976738	0.970841	0.948911	0.994587	0.971548	0.998342	0.967451	0.988871
1889	0.983554	0.95778	0.963044	0.988707	0.966571	1.00136	0.973487	0.996062
1890	0.974	0.967201	0.961585	0.994207	0.969957	1.02647	0.970164	0.990803
1891	0.986921	0.968595	0.964868	0.994087	0.967598	1.03869	0.970898	0.995053
1892	0.977108	0.975753	0.968353	0.994947	0.971965	1.0403	0.973604	0.98857
1893	0.976543	0.981249	0.963262	1.00049	0.980175	1.02829	0.975072	0.982836
1894	0.986125	0.985253	0.961414	1.00081	0.989497	1.02477	0.978055	0.982979
1895	0.981402	0.997166	0.96824	0.998585	0.992171	1.02794	0.978224	0.985377
1896	0.982229	0.982399	0.964576	1.00157	1.00112	1.0222	0.981098	0.979508
1897	0.978997	0.986705	0.9752	0.992686	0.99742	1.01596	0.965873	0.979853
1898	0.974464	0.97432	0.964897	0.993136	0.985099	1.00912	0.959121	0.979272
1899	0.978832	0.977477	0.968795	0.993063	0.9888	1.01099	0.957488	0.986054
1900	0.98049	0.978233	0.969885	0.9934	0.991224	1.01706	0.96036	0.982736
1901	0.972074	0.969713	0.967917	0.998353	0.976154	1.00505	0.964296	0.987265
1902	0.972959	0.969463	0.972243	0.996673	0.980999	0.984087	0.978121	0.981695
1903	0.984213	0.964805	0.966857	0.996451	0.984414	0.9828	0.980953	0.981289
1904	0.986703	0.963201	0.959911	0.993934	0.990195	0.984802	0.985627	0.981481
1905	0.974703	0.965734	0.972474	0.995345	0.988858	0.98628	0.983658	0.985454
1906	0.985423	0.968195	0.95596	0.993969	0.984895	0.979	0.97797	0.977987
1907	0.985684	0.969356	0.967993	0.997718	0.980969	0.980628	0.985381	0.984249
1908	0.979128	0.968426	0.955632	0.998069	0.986944	0.985241	0.975989	0.98845
1909	0.973435	0.972917	0.958846	0.995217	0.97456	0.978555	0.981077	0.988074
1910	0.974297	0.979669	0.968976	0.992754	0.973171	0.969349	0.97637	0.981873
1911	0.973876	0.974556	0.966926	0.98843	0.977019	0.961385	0.980871	0.981307
1912	0.977253	0.968314	0.957771	0.991968	0.989248	0.955093	0.969437	0.990321
1913	0.982343	0.97121	0.951539	0.995518	0.995906	0.963654	0.979299	0.994585
1914	0.984545	0.97851	0.964739	0.992449	0.99241	0.951404	0.983875	0.989082
1915	0.981121	0.978192	0.961879	0.992142	0.981989	0.941098	0.983429	0.985002
1916	0.979367	0.971554	0.954746	0.991235	0.981746	0.942369	0.9788	0.979664
1917	0.982409	0.968006	0.957905	0.995871	0.981992	0.93991	0.975965	0.980077
1918	0.974812	0.973959	0.962179	0.996106	0.984905	0.943536	0.989193	0.976659
1919	0.976383	0.972088	0.955482	0.99935	0.968744	0.946505	0.995518	0.972431
1920	0.968097	0.969804	0.961758	1.00272	0.977171	0.947414	0.996107	0.971684
1921	0.980279	0.966949	0.971783	1.00121	0.986948	0.94854	0.99729	0.97332
1922	0.973732	0.964809	0.965191	1.00054	0.981653	0.950596	0.988139	0.972946
1923	0.970023	0.966906	0.966497	0.999207	0.981117	0.969939	0.983069	0.979485
1924	0.978345	0.960487	0.955309	0.998396	0.979556	0.975062	0.978819	0.980206
1925	0.978692	0.953955	0.968855	0.997577	0.990568	0.967398	0.986107	0.984217
1926	0.989035	0.958319	0.956946	0.995815	0.99274	0.978646	0.982367	0.983099
1927	0.9709	0.958604	0.957508	0.994107	0.985437	0.984292	0.986945	0.97723
1928	0.984452	0.95651	0.957719	0.996959	0.973325	0.992973	0.984277	0.976981
1929	0.97505	0.95951	0.965733	0.996831	0.977408	0.994713	0.968101	0.979218
1930	0.977281	0.955588	0.967593	0.996675	0.977856	0.987464	0.968095	0.975415
1931	0.984987	0.966345	0.970019	0.996797	0.975311	0.984407	0.973762	0.977164
1932	0.988348	0.962891	0.961961	0.99586	0.980929	0.984334	0.97959	0.976446
1933	0.974	0.961912	0.958431	0.99323	0.982333	0.986231	0.978557	0.974948
1934	0.970226	0.96458	0.973526	0.993035	0.985127	0.994538	0.97637	0.979836
1935	0.96252	0.95742	0.965175	0.991771	0.986753	0.997222	0.97722	0.978929
1936	0.981402	0.9625	0.965896	0.991899	0.977639	0.999282	0.980575	0.98161
1937	0.984553	0.962766	0.965664	0.989862	0.97726	0.985484	0.980739	0.983073
1938	0.977673	0.960544	0.95995	0.996245	0.975876	0.982784	0.985426	0.982239
1939	0.979113	0.957203	0.968156	0.991533	0.966824	0.978006	0.979511	0.976224
1940	0.978715	0.963351	0.955224	0.996454	0.969403	0.967338	0.987167	0.981089
1941	0.974725	0.973272	0.967533	0.996328	0.976545	0.96062	0.982409	0.986174
1942	0.977635	0.966842	0.978265	0.988415	0.97866	0.978565	0.979659	0.98745
1943	0.974398	0.964523	0.967052	0.988551	0.983433	0.99694	0.977196	0.983257
1944	0.978064	0.976876	0.976724	0.984222	0.986916	1.00334	0.985156	0.984089
1945	0.981519	0.978032	0.958273	0.988454	0.984971	1.00412	0.978015	0.987074
1946	0.983357	0.976618	0.974516	0.988748	0.975913	0.999498	0.975511	0.986755
1947	0.980041	0.972824	0.958604	0.989594	0.974426	0.992848	0.986092	0.979429
1948	0.988675	0.964266	0.959057	0.987641	0.976035	0.981407	0.991573	0.972803
1949	0.978606	0.963532	0.961059	0.992868	0.986412	0.978308	0.993362	0.974545
1950	0.968408	0.963965	0.970521	0.994128	0.981852	0.989498	0.993557	0.972386
1951	0.97581	0.967963	0.961819	0.994881	0.974192	0.999908	0.985183	0.978485
1952	0.981902	0.968017	0.959566	0.996774	0.973145	1.00668	0.990289	0.980661
1953	0.983894	0.971795	0.955766	0.992984	0.973249	1.00344	0.992332	0.980158
1954	0.979063	0.978986	0.959101	0.993508	0.977005	1.00562	0.983658	0.983168
1955	0.960479	0.984454	0.962142	0.998198	0.981588	1.00738	0.974066	0.984421
1956	0.978477	0.977689	0.959425	0.993936	0.980587	1.00162	0.973659	0.995351
1957	0.982373	0.981591	0.960003	0.994058	0.98755	0.982659	0.96515	0.996317
1958	0.985415	0.979645	0.955758	0.9975	0.997111	0.980025	0.971873	0.993452
1959	0.97705	0.98335	0.953287	0.995587	1.00572	0.978479	0.976029	0.9854
1960	0.985189	0.975499	0.954047	0.991471	1.00501	0.978858	0.976911	0.985205
1961	0.982872	0.967566	0.953093	0.992893	0.996439	0.970988	0.963105	0.991512
1962	0.97868	0.958282	0.958289	0.99449	0.991551	0.969047	0.96362	0.991689
1963	0.980692	0.960417	0.959267	0.995328	0.980017	0.977279	0.962479	0.989066
1964	0.991238	0.963823	0.953093	0.994763	0.984084	0.967241	0.966832	0.984854
1965	0.975455	0.962338	0.959693	0.995479	0.995042	0.967545	0.979167	0.979463
1966	0.975978	0.966289	0.959611	0.994373	0.99199	0.972154	0.988332	0.978102
1967	0.978738	0.967041	0.955398	0.994635	0.979624	0.9799	0.988253	0.977774
1968	0.963767	0.968014	0.939402	0.996368	0.974041	0.971359	0.985135	0.981759
1969	0.985494	0.966021	0.956081	0.991605	0.979744	0.973876	0.979495	0.980558
1970	0.978325	0.971527	0.952935	0.995257	0.98392	0.973338	0.98774	0.98196
1971	0.969792	0.968112	0.965604	0.990546	0.985875	0.969482	0.984406	0.97827
1972	0.974956	0.973014	0.957169	0.991152	0.984694	0.968133	0.984834	0.974037
1973	0.980084	0.959707	0.95596	0.990134	0.979411	0.980921	0.989692	0.982075
1974	0.964664	0.952998	0.959498	0.988437	0.981912	0.994854	0.987209	0.979429
1975	0.972487	0.948753	0.96957	0.993872	0.9834	0.996249	0.977165	0.989145
1976	0.97868	0.958874	0.967977	0.995613	0.985558	1.00094	0.994059	0.98605
1977	0.981012	0.963125	0.968826	0.995487	0.978929	0.998269	0.979638	0.99041
1978	0.980903	0.965651	0.961354	0.988399	0.987109	1.01546	0.979521	0.984654
1979	0.973559	0.964988	0.963501	0.994101	0.986223	1.02856	0.976784	0.975402
1980	0.979585	0.973025	0.960294	0.992358	0.991582	1.04351	0.969229	0.976176
1981	0.973146	0.974358	0.975705	0.993664	0.987982	1.05667	0.976158	0.977917
1982	0.963478	0.978714	0.967788	0.988843	0.982231	1.05809	0.976628	0.981699
1983	0.974594	0.970862	0.957485	0.990854	0.974174	1.05772	0.98666	0.978649
1984	0.970089	0.970894	0.969433	0.996335	0.970483	1.0534	0.985476	0.982624
1985	0.963296	0.975273	0.974916	0.994184	0.970902	1.04584	0.974135	0.977853
1986	0.976563	0.973786	0.950622	0.995613	0.972102	1.03574	0.976996	0.985103
1987	0.965815	0.977313	0.966295	0.992032	0.972465	1.03506	0.978034	0.978361
1988	0.970791	0.96818	0.967144	0.993829	0.974655	1.03768	0.984676	0.98196
1989	0.971661	0.968202	0.958762	0.991134	0.979783	1.04405	0.989801	0.983238
1990	0.968287	0.970897	0.967783	0.989341	0.980248	1.03468	0.982916	0.984361
1991	0.966497	0.976779	0.962502	0.991547	0.973145	1.02672	0.981843	0.97768
1992	0.974391	0.973793	0.960481	0.995846	0.969938	1.01058	0.984203	0.98667
1993	0.968872	0.964652	0.957545	0.992327	0.973738	1.01706	0.975197	0.990524
1994	0.970335	0.955558	0.968563	0.995386	0.977386	1.01727	0.974047	0.999188
1995	0.971625	0.953843	0.974766	0.992935	0.983088	1.01822	0.979173	0.989803
1996	0.977339	0.949903	0.965146	0.994169	0.993549	1.02168	0.976813	0.992574
1997	0.967425	0.954285	0.967173	0.989891	0.999266	1.01289	0.979772	0.987321
1998	0.980736	0.955706	0.960218	0.989597	1.0062	1.00897	0.979611	0.985488
[truncated: 1,668 more rows]

## Sheet: ED Figure 1F
637 + 470 nm	Y(x) = 1518 * exp(-0.00148 * x)		637 nm	Y(x) = 1649 * exp(-0.00135 * x)				637	637	637 + 470	637 + 470
Time (s)	Fluorescence (a.u.)		Time (s)	Fluorescence (a.u.)			Fit parameter:	a	b	a	b
0	1518		0	1649			y = a · exp(-bx) + c	2196	0.00138	443	0.00207
32.4141	1446.9		32.4141	1578.4				5282	0.00057231	939	0.00235
64.8283	1379.12		64.8283	1510.82				1090	0.0013	416	0.00119
97.2424	1314.52		97.2424	1446.13				1335	0.0016	762	0.00249
129.657	1252.95		129.657	1384.21				1125	0.00137	881	0.00057281
162.071	1194.26		162.071	1324.95				552	0.00159	527	0.00074372
194.485	1138.32		194.485	1268.22				1413	0.00174	3770	0.00141
226.899	1085		226.899	1213.92				1089	0.00181	3623	0.00144
259.313	1034.18		259.313	1161.95				764	0.00081954	2307	0.00115
291.727	985.74		291.727	1112.2				1089	0.00181	4728	0.00146
324.141	939.567		324.141	1064.58				764	0.00081954
356.556	895.558		356.556	1019
388.97	853.609		388.97	975.368					p-value:
421.384	813.626		421.384	933.608			Parameter a	637 + 470 / 637	0.62431
453.798	775.515		453.798	893.635			Parameter b	637 + 470 / 637	0.56032
486.212	739.19		486.212	855.373
518.626	704.566		518.626	818.75
551.04	671.564		551.04	783.695
583.455	640.108		583.455	750.141
615.869	610.125		615.869	718.023
648.283	581.546		648.283	687.28
680.697	554.306		680.697	657.854
713.111	528.342		713.111	629.688
745.525	503.595		745.525	602.728
777.939	480.006		777.939	576.921
810.354	457.522		810.354	552.22
842.768	436.092		842.768	528.577
875.182	415.665		875.182	505.945
907.596	396.195		907.596	484.283
940.01	377.637		940.01	463.548
972.424	359.949		972.424	443.701
1004.84	343.088		1004.84	424.704
1037.25	327.018		1037.25	406.52
1069.67	311.7		1069.67	389.115
1102.08	297.1		1102.08	372.455
1134.49	283.184		1134.49	356.508
1166.91	269.919		1166.91	341.244
1199.32	257.276		1199.32	326.633
1231.74	245.225		1231.74	312.648
1264.15	233.739		1264.15	299.262
1296.57	222.79		1296.57	286.449
1328.98	212.355		1328.98	274.185
1361.39	202.408		1361.39	262.445
1393.81	192.927		1393.81	251.209
1426.22	183.89		1426.22	240.453
1458.64	175.277		1458.64	230.158
1491.05	167.067		1491.05	220.304
1523.46	159.241		1523.46	210.871
1555.88	151.782		1555.88	201.843
1588.29	144.673		1588.29	193.201
1620.71	137.896		1620.71	184.929
1653.12	131.437		1653.12	177.011
1685.54	125.281		1685.54	169.432
1717.95	119.412		1717.95	162.178
1750.36	113.819		1750.36	155.234
1782.78	108.488		1782.78	148.588
1815.19	103.406		1815.19	142.226
1847.61	98.5626		1847.61	136.136
1880.02	93.9459		1880.02	130.308
1912.43	89.5454		1912.43	124.728
1944.85	85.3511		1944.85	119.388
1977.26	81.3532		1977.26	114.276
2009.68	77.5426		2009.68	109.384
2042.09	73.9105		2042.09	104.7
2074.51	70.4485		2074.51	100.217
2106.92	67.1486		2106.92	95.9266
2139.33	64.0034		2139.33	91.8195
2171.75	61.0054		2171.75	87.8882
2204.16	58.1479		2204.16	84.1252
2236.58	55.4242		2236.58	80.5233
2268.99	52.8281		2268.99	77.0757
2301.4	50.3536		2301.4	73.7757
2333.82	47.9951		2333.82	70.6169
2366.23	45.7469		2366.23	67.5934
2398.65	43.6041		2398.65	64.6994
2431.06	41.5617		2431.06	61.9292
2463.47	39.6149		2463.47	59.2777
2495.89	37.7594		2495.89	56.7397
2528.3	35.9907		2528.3	54.3104
2560.72	34.3049		2560.72	51.9851
2593.13	32.698		2593.13	49.7593
2625.55	31.1664		2625.55	47.6288
2657.96	29.7066		2657.96	45.5896
2690.37	28.3151		2690.37	43.6376
2722.79	26.9888		2722.79	41.7693
2755.2	25.7247		2755.2	39.9809
2787.62	24.5197		2787.62	38.2691
2820.03	23.3712		2820.03	36.6306
2852.44	22.2765		2852.44	35.0622
2884.86	21.233		2884.86	33.561
2917.27	20.2385		2917.27	32.1241
2949.69	19.2905		2949.69	30.7487
2982.1	18.3869		2982.1	29.4322
3014.52	17.5257		3014.52	28.172
3046.93	16.7048		3046.93	26.9658
3079.34	15.9223		3079.34	25.8113
3111.76	15.1765		3111.76	24.7061
3144.17	14.4656		3144.17	23.6483
3176.59	13.788		3176.59	22.6358
3209	13.1422		3209	21.6667

## Sheet: ED Figure 1G
wild type	egl-19(n2368)	unc-13(n2813)
2099	2204	2266
2590	2414	2889
2316	2424	2216
2290	2784	2575
2580	2334	2517
2566	2564	2122
2661	2625	2481
2463	2199	2621
2200	2417	2424
2761		2386
	p-value:
egl-19(n2368) / wild type	1
unc-13(n2813) / wild type	1
unc-13(n2813) / egl-19(n2368)	1

## Sheet: ED Figure 1H
																	DF/F0		Wavelength
Time	dF/F0_bleach_correct	Wavelength	dF/F0_bleach_correct	Wavelength	dF/F0_bleach_correct	Wavelength	dF/F0_bleach_correct	Wavelength	dF/F0_bleach_correct	Wavelength	dF/F0_bleach_correct	Wavelength	dF/F0_bleach_correct	Wavelength	dF/F0_bleach_correct	Wavelength	mean	SEM	mean	SEM
0.011	0	520	0	520	0	520	0	520	0	520	0	520	0	520	0	520	0	0	520	0
0.0221	0	520	0	520	0	520	0	520	0	520	0	520	0	520	0	520	0	0	520	0
0.0331	0	520	0	520	0	520	0	520	0	520	0	520	0	520	0	520	0	0	520	0
0.0441	0	520	0	520	0	520	0	520	0	520	0	520	0	520	0	520	0	0	520	0
0.0552	0	520	0	520	0	520	0	520	0	520	0	520	0	520	0	520	0	0	520	0
0.0662	0	520	0	520	0	520	0	520	0	520	0	520	0	520	0	520	0	0	520	0
0.0772	0	520	0	520	0	520	0	520	0	520	0	520	0	520	0	520	0	0	520	0
0.0883	0	520	0	520	0	520	0	520	0	520	0	520	0	520	0	520	0	0	520	0
0.0993	0	520	0	520	0	520	0	520	0	520	0	520	0	520	0	520	0	0	520	0
0.1104	0	520	0	520	0	520	0	520	0	520	0	520	0	520	0	520	0	0	520	0
0.1214	0	520	0	520	0	520	0	520	0	520	0	520	0	520	0	520	0	0	520	0
0.1324	0	520	0	520	0	520	0	520	0	520	0	520	0	520	0	520	0	0	520	0
0.1435	0	520	0	520	0	520	0	520	0	520	0	520	0	520	0	520	0	0	520	0
0.1545	0	520	0	520	0	520	0	520	0	520	0	520	0	520	0	520	0	0	520	0
0.1655	0	520	0	520	0	520	0	520	0	520	0	520	0	520	0	520	0	0	520	0
0.1766	0	520	0	520	0	520	0	520	0	520	0	520	0	520	0	520	0	0	520	0
0.1876	0	520	0	520	0	520	0	520	0	520	0	520	0	520	0	520	0	0	520	0
0.1986	0	520	0	520	0	520	0	520	0	520	0	520	0	520	0	520	0	0	520	0
0.2097	0	520	0	520	0	520	0	520	0	520	0	520	0	520	0	520	0	0	520	0
0.2207	0	520	0	520	0	520	0	520	0	520	0	520	0	520	0	520	0	0	520	0
0.2317	0	520	0	520	0	520	0	520	0	520	0	520	0	520	0	520	0	0	520	0
0.2428	0	520	0	520	0	520	0	520	0	520	0	520	0	520	0	520	0	0	520	0
0.2538	0	520	0	520	0	520	0	520	0	520	0	520	0	520	0	520	0	0	520	0
0.2648	0	520	0	520	0	520	0	520	0	520	0	520	0	520	0	520	0	0	520	0
0.2759	0	520	0	520	0	520	0	520	0	520	0	520	0	520	0	520	0	0	520	0
0.2869	0	520	0	520	0	520	0	520	0	520	0	520	0	520	0	520	0	0	520	0
0.298	0	520	0	520	0	520	0	520	0	520	0	520	0	520	0	520	0	0	520	0
0.309	0	520	0	520	0	520	0	520	0	520	0	520	0	520	0	520	0	0	520	0
0.32	0	520	0	520	0	520	0	520	0	520	0	520	0	520	0	520	0	0	520	0
0.3311	0	520	0	520	0	520	0	520	0	520	0	520	0	520	0	520	0	0	520	0
0.3421	0	520	0	520	0	520	0	520	0	520	0	520	0	520	0	520	0	0	520	0
0.3531	0	520	0	520	0	520	0	520	0	520	0	520	0	520	0	520	0	0	520	0
0.3642	0	520	0	520	0	520	0	520	0	520	0	520	0	520	0	520	0	0	520	0
0.3752	0	520	0	520	0	520	0	520	0	520	0	520	0	520	0	520	0	0	520	0
0.3862	0	520	0	520	0	520	0	520	0	520	0	520	0	520	0	520	0	0	520	0
0.3973	0	520	0	520	0	520	0	520	0	520	0	520	0	520	0	520	0	0	520	0
0.4083	0	520	0	520	0	520	0	520	0	520	0	520	0	520	0	520	0	0	520	0
0.4193	0	520	0	520	0	520	0	520	0	520	0	520	0	520	0	520	0	0	520	0
0.4304	0	520	0	520	0	520	0	520	0	520	0	520	0	520	0	520	0	0	520	0
0.4414	0	520	0	520	0	520	0	520	0	520	0	520	0	520	0	520	0	0	520	0
0.4524	0	520	0	520	0	520	0	520	0	520	0	520	0	520	0	520	0	0	520	0
0.4635	0	520	0	520	0	520	0	520	0	520	0	520	0	520	0	520	0	0	520	0
0.4745	0	520	0	520	0	520	0	520	0	520	0	520	0	520	0	520	0	0	520	0
0.4855	0	520	0	520	0	520	0	520	0	520	0	520	0	520	0	520	0	0	520	0
0.4966	0	520	0	520	0	520	0	520	0	520	0	520	0	520	0	520	0	0	520	0
0.5076	0	520	0	520	0	520	0	520	0	520	0	520	0	520	0	520	0	0	520	0
0.5187	0	520	0	520	0	520	0	520	0	520	0	520	0	520	0	520	0	0	520	0
0.5297	0	520	0	520	0	520	0	520	0	520	0	520	0	520	0	520	0	0	520	0
0.5407	0	520	0	520	0	520	0	520	0	520	0	520	0	520	0	520	0	0	520	0
0.5518	0	520	0	520	0	520	0	520	0	520	0	520	0	520	0	520	0	0	520	0
0.5628	0	520	0	520	0	520	0	520	0	520	0	520	0	520	0	520	0	0	520	0
0.5738	0	520	0	520	0	520	0	520	0	520	0	520	0	520	0	520	0	0	520	0
0.5849	0	520	0	520	0	520	0	520	0	520	0	520	0	520	0	520	0	0	520	0
0.5959	0	520	0	520	0	520	0	520	0	520	0	520	0	520	0	520	0	0	520	0
0.6069	0	520	0	520	0	520	0	520	0	520	0	520	0	520	0	520	0	0	520	0
0.618	0	520	0	520	0	520	0	520	0	520	0	520	0	520	0	520	0	0	520	0
0.629	0	520	0	520	0	520	0	520	0	520	0	520	0	520	0	520	0	0	520	0
0.64	0	520	0	520	0	520	0	520	0	520	0	520	0	520	0	520	0	0	520	0
0.6511	0	520	0	520	0	520	0	520	0	520	0	520	0	520	0	520	0	0	520	0
0.6621	0	520	0	520	0	520	0	520	0	520	0	520	0	520	0	520	0	0	520	0
0.6731	0	520	0	520	0	520	0	520	0	520	0	520	0	520	0	520	0	0	520	0
0.6842	0	520	0	520	0	520	0	520	0	520	0	520	0	520	0	520	0	0	520	0
0.6952	0	520	0	520	0	520	0	520	0	520	0	520	0	520	0	520	0	0	520	0
0.7063	0	520	0	520	0	520	0	520	0	520	0	520	0	520	0	520	0	0	520	0
0.7173	0	520	0	520	0	520	0	520	0	520	0	520	0	520	0	520	0	0	520	0
0.7283	0	520	0	520	0	520	0	520	0	520	0	520	0	520	0	520	0	0	520	0
0.7394	0	520	0	520	0	520	0	520	0	520	0	520	0	520	0	520	0	0	520	0
0.7504	0	520	0	520	0	520	0	520	0	520	0	520	0	520	0	520	0	0	520	0
0.7614	0	520	0	520	0	520	0	520	0	520	0	520	0	520	0	520	0	0	520	0
0.7725	0	520	0	520	0	520	0	520	0	520	0	520	0	520	0	520	0	0	520	0
0.7835	0	520	0	520	0	520	0	520	0	520	0	520	0	520	0	520	0	0	520	0
0.7945	0	520	0	520	0	520	0	520	0	520	0	520	0	520	0	520	0	0	520	0
0.8056	0	520	0	520	0	520	0	520	0	520	0	520	0	520	0	520	0	0	520	0
0.8166	0	520	0	520	0	520	0	520	0	520	0	520	0	520	0	520	0	0	520	0
0.8276	0	520	0	520	0	520	0	520	0	520	0	520	0	520	0	520	0	0	520	0
0.8387	0	520	0	520	0	520	0	520	0	520	0	520	0	520	0	520	0	0	520	0
0.8497	0	520	0	520	0	520	0	520	0	520	0	520	0	520	0	520	0	0	520	0
0.8607	0	520	0	520	0	520	0	520	0	520	0	520	0	520	0	520	0	0	520	0
0.8718	0	520	0	520	0	520	0	520	0	520	0	520	0	520	0	520	0	0	520	0
0.8828	0	520	0	520	0	520	0	520	0	520	0	520	0	520	0	520	0	0	520	0
0.8939	0	520	0	520	0	520	0	520	0	520	0	520	0	520	0	520	0	0	520	0
0.9049	0	520	0	520	0	520	0	520	0	520	0	520	0	520	0	520	0	0	520	0
0.9159	0	520	0	520	0	520	0	520	0	520	0	520	0	520	0	520	0	0	520	0
0.927	0	520	0	520	0	520	0	520	0	520	0	520	0	520	0	520	0	0	520	0
0.938	0	520	0	520	0	520	0	520	0	520	0	520	0	520	0	520	0	0	520	0
0.949	0	520	0	520	0	520	0	520	0	520	0	520	0	520	0	520	0	0	520	0
0.9601	0	520	0	520	0	520	0	520	0	520	0	520	0	520	0	520	0	0	520	0
0.9711	0	520	0	520	0	520	0	520	0	520	0	520	0	520	0	520	0	0	520	0
0.9821	0	520	0	520	0	520	0	520	0	520	0	520	0	520	0	520	0	0	520	0
0.9932	0	520	0	520	0	520	0	520	0	520	0	520	0	520	0	520	0	0	520	0
1.0042	0	520	0	520	0	520	0	520	0	520	0	520	0	520	0	520	0	0	520	0
1.0152	0	520	0	520	0	520	0	520	0	520	0	520	0	520	0	520	0	0	520	0
1.0263	0	520	0	520	0	520	0	520	0	520	0	520	0	520	0	520	0	0	520	0
1.0373	0	520	0	520	0	520	0	520	0	520	0	520	0	520	0	520	0	0	520	0
1.0483	0	520	0	520	0	520	0	520	0	520	0	520	0	520	0	520	0	0	520	0
1.0594	0	520	0	520	0	520	0	520	0	520	0	520	0	520	0	520	0	0	520	0
1.0704	0	520	0	520	0	520	0	520	0	520	0	520	0	520	0	520	0	0	520	0
1.0814	0	520	0	520	0	520	0	520	0	520	0	520	0	520	0	520	0	0	520	0
1.0925	0	520	0	520	0	520	0	520	0	520	0	520	0	520	0	520	0	0	520	0
1.1035	0	520	0	520	0	520	0	520	0	520	0	520	0	520	0	520	0	0	520	0
1.1146	0	520	0	520	0	520	0	520	0	520	0	520	0	520	0	520	0	0	520	0
1.1256	0	520	0	520	0	520	0	520	0	520	0	520	0	520	0	520	0	0	520	0
1.1366	0	520	0	520	0	520	0	520	0	520	0	520	0	520	0	520	0	0	520	0
1.1477	0	520	0	520	0	520	0	520	0	520	0	520	0	520	0	520	0	0	520	0
1.1587	0	520	0	520	0	520	0	520	0	520	0	520	0	520	0	520	0	0	520	0
1.1697	0	520	0	520	0	520	0	520	0	520	0	520	0	520	0	520	0	0	520	0
1.1808	0	520	0	520	0	520	0	520	0	520	0	520	0	520	0	520	0	0	520	0
1.1918	0	520	0	520	0	520	0	520	0	520	0	520	0	520	0	520	0	0	520	0
1.2028	0	520	0	520	0	520	0	520	0	520	0	520	0	520	0	520	0	0	520	0
1.2139	0	520	0	520	0	520	0	520	0	520	0	520	0	520	0	520	0	0	520	0
1.2249	0	520	0	520	0	520	0	520	0	520	0	520	0	520	0	520	0	0	520	0
1.2359	0	520	0	520	0	520	0	520	0	520	0	520	0	520	0	520	0	0	520	0
1.247	0	520	0	520	0	520	0	520	0	520	0	520	0	520	0	520	0	0	520	0
1.258	0	520	0	520	0	520	0	520	0	520	0	520	0	520	0	520	0	0	520	0
1.269	0	520	0	520	0	520	0	520	0	520	0	520	0	520	0	520	0	0	520	0
1.2801	0	520	0	520	0	520	0	520	0	520	0	520	0	520	0	520	0	0	520	0
1.2911	0	520	0	520	0	520	0	520	0	520	0	520	0	520	0	520	0	0	520	0
1.3022	0	520	0	520	0	520	0	520	0	520	0	520	0	520	0	520	0	0	520	0
1.3132	0	520	0	520	0	520	0	520	0	520	0	520	0	520	0	520	0	0	520	0
1.3242	0	520	0	520	0	520	0	520	0	520	0	520	0	520	0	520	0	0	520	0
1.3353	0	520	0	520	0	520	0	520	0	520	0	520	0	520	0	520	0	0	520	0
1.3463	0	520	0	520	0	520	0	520	0	520	0	520	0	520	0	520	0	0	520	0
1.3573	0	520	0	520	0	520	0	520	0	520	0	520	0	520	0	520	0	0	520	0
1.3684	0	520	0	520	0	520	0	520	0	520	0	520	0	520	0	520	0	0	520	0
1.3794	0	520	0	520	0	520	0	520	0	520	0	520	0	520	0	520	0	0	520	0
1.3904	0	520	0	520	0	520	0	520	0	520	0	520	0	520	0	520	0	0	520	0
1.4015	0	520	0	520	0	520	0	520	0	520	0	520	0	520	0	520	0	0	520	0
1.4125	0	520	0	520	0	520	0	520	0	520	0	520	0	520	0	520	0	0	520	0
1.4235	0	520	0	520	0	520	0	520	0	520	0	520	0	520	0	520	0	0	520	0
1.4346	0	520	0	520	0	520	0	520	0	520	0	520	0	520	0	520	0	0	520	0
1.4456	0	520	0	520	0	520	0	520	0	520	0	520	0	520	0	520	0	0	520	0
1.4566	0	520	0	520	0	520	0	520	0	520	0	520	0	520	0	520	0	0	520	0
1.4677	0	520	0	520	0	520	0	520	0	520	0	520	0	520	0	520	0	0	520	0
1.4787	0	520	0	520	0	520	0	520	0	520	0	520	0	520	0	520	0	0	520	0
1.4898	0	520	0	520	0	520	0	520	0	520	0	520	0	520	0	520	0	0	520	0
1.5008	0	520	0	520	0	520	0	520	0	520	0	520	0	520	0	520	0	0	520	0
1.5118	0	520	0	520	0	520	0	520	0	520	0	520	0	520	0	520	0	0	520	0
1.5229	0	520	0	520	0	520	0	520	0	520	0	520	0	520	0	520	0	0	520	0
1.5339	0	520	0	520	0	520	0	520	0	520	0	520	0	520	0	520	0	0	520	0
1.5449	0	520	0	520	0	520	0	520	0	520	0	520	0	520	0	520	0	0	520	0
1.556	0	520	0	520	0	520	0	520	0	520	0	520	0	520	0	520	0	0	520	0
1.567	0	520	0	520	0	520	0	520	0	520	0	520	0	520	0	520	0	0	520	0
1.578	0	520	0	520	0	520	0	520	0	520	0	520	0	520	0	520	0	0	520	0
1.5891	0	520	0	520	0	520	0	520	0	520	0	520	0	520	0	520	0	0	520	0
1.6001	0	520	0	520	0	520	0	520	0	520	0	520	0	520	0	520	0	0	520	0
1.6111	0	520	0	520	0	520	0	520	0	520	0	520	0	520	0	520	0	0	520	0
1.6222	0	520	0	520	0	520	0	520	0	520	0	520	0	520	0	520	0	0	520	0
1.6332	0	520	0	520	0	520	0	520	0	520	0	520	0	520	0	520	0	0	520	0
1.6442	0	520	0	520	0	520	0	520	0	520	0	520	0	520	0	520	0	0	520	0
1.6553	0	520	0	520	0	520	0	520	0	520	0	520	0	520	0	520	0	0	520	0
1.6663	0	520	0	520	0	520	0	520	0	520	0	520	0	520	0	520	0	0	520	0
1.6774	0	520	0	520	0	520	0	520	0	520	0	520	0	520	0	520	0	0	520	0
1.6884	0	520	0	520	0	520	0	520	0	520	0	520	0	520	0	520	0	0	520	0
1.6994	0	520	0	520	0	520	0	520	0	520	0	520	0	520	0	520	0	0	520	0
1.7105	0	520	0	520	0	520	0	520	0	520	0	520	0	520	0	520	0	0	520	0
1.7215	0	520	0	520	0	520	0	520	0	520	0	520	0	520	0	520	0	0	520	0
1.7325	0	520	0	520	0	520	0	520	0	520	0	520	0	520	0	520	0	0	520	0
1.7436	0	520	0	520	0	520	0	520	0	520	0	520	0	520	0	520	0	0	520	0
1.7546	0	520	0	520	0	520	0	520	0	520	0	520	0	520	0	520	0	0	520	0
1.7656	0	520	0	520	0	520	0	520	0	520	0	520	0	520	0	520	0	0	520	0
1.7767	0	520	0	520	0	520	0	520	0	520	0	520	0	520	0	520	0	0	520	0
1.7877	0	520	0	520	0	520	0	520	0	520	0	520	0	520	0	520	0	0	520	0
1.7987	0	520	0	520	0	520	0	520	0	520	0	520	0	520	0	520	0	0	520	0
1.8098	0	520	0	520	0	520	0	520	0	520	0	520	0	520	0	520	0	0	520	0
1.8208	0	520	0	520	0	520	0	520	0	520	0	520	0	520	0	520	0	0	520	0
1.8318	0	520	0	520	0	520	0	520	0	520	0	520	0	520	0	520	0	0	520	0
1.8429	0	520	0	520	0	520	0	520	0	520	0	520	0	520	0	520	0	0	520	0
1.8539	0	520	0	520	0	520	0	520	0	520	0	520	0	520	0	520	0	0	520	0
1.8649	0	520	0	520	0	520	0	520	0	520	0	520	0	520	0	520	0	0	520	0
1.876	0	520	0	520	0	520	0	520	0	520	0	520	0	520	0	520	0	0	520	0
1.887	0	520	0	520	0	520	0	520	0	520	0	520	0	520	0	520	0	0	520	0
1.8981	0	520	0	520	0	520	0	520	0	520	0	520	0	520	0	520	0	0	520	0
1.9091	0	520	0	520	0	520	0	520	0	520	0	520	0	520	0	520	0	0	520	0
1.9201	0	520	0	520	0	520	0	520	0	520	0	520	0	520	0	520	0	0	520	0
1.9312	0	520	0	520	0	520	0	520	0	520	0	520	0	520	0	520	0	0	520	0
1.9422	0	520	0	520	0	520	0	520	0	520	0	520	0	520	0	520	0	0	520	0
1.9532	0	520	0	520	0	520	0	520	0	520	0	520	0	520	0	520	0	0	520	0
1.9643	0	520	0	520	0	520	0	520	0	520	0	520	0	520	0	520	0	0	520	0
1.9753	0	520	0	520	0	520	0	520	0	520	0	520	0	520	0	520	0	0	520	0
1.9863	0	520	0	520	0	520	0	520	0	520	0	520	0	520	0	520	0	0	520	0
1.9974	0	520	0	520	0	520	0	520	0	520	0	520	0	520	0	520	0	0	520	0
2.0084	0	520	0	520	0	520	0	520	0	520	0	520	0	520	0	520	0	0	520	0
2.0194	0	520	0	520	0	520	0	520	0	520	0	520	0	520	0	520	0	0	520	0
2.0305	0	520	0	520	0	520	0	520	0	520	0	520	0	520	0	520	0	0	520	0
2.0415	0	520	0	520	0	520	0	520	0	520	0	520	0	520	0	520	0	0	520	0
2.0525	0	520	0	520	0	520	0	520	0	520	0	520	0	520	0	520	0	0	520	0
2.0636	0	520	0	520	0	520	0	520	0	520	0	520	0	520	0	520	0	0	520	0
2.0746	0	520	0	520	0	520	0	520	0	520	0	520	0	520	0	520	0	0	520	0
2.0857	0	520	0	520	0	520	0	520	0	520	0	520	0	520	0	520	0	0	520	0
2.0967	0	520	0	520	0	520	0	520	0	520	0	520	0	520	0	520	0	0	520	0
2.1077	0	520	0	520	0	520	0	520	0	520	0	520	0	520	0	520	0	0	520	0
2.1188	0	520	0	520	0	520	0	520	0	520	0	520	0	520	0	520	0	0	520	0
2.1298	0	520	0	520	0	520	0	520	0	520	0	520	0	520	0	520	0	0	520	0
2.1408	0	520	0	520	0	520	0	520	0	520	0	520	0	520	0	520	0	0	520	0
2.1519	0	520	0	520	0	520	0	520	0	520	0	520	0	520	0	520	0	0	520	0
2.1629	0	520	0	520	0	520	0	520	0	520	0	520	0	520	0	520	0	0	520	0
2.1739	0	520	0	520	0	520	0	520	0	520	0	520	0	520	0	520	0	0	520	0
2.185	0	520	0	520	0	520	0	520	0	520	0	520	0	520	0	520	0	0	520	0
2.196	0	520	0	520	0	520	0	520	0	520	0	520	0	520	0	520	0	0	520	0
2.207	0	520	0	520	0	520	0	520	0	520	0	520	0	520	0	520	0	0	520	0
2.2181	0	520	0	520	0	520	0	520	0	520	0	520	0	520	0	520	0	0	520	0
2.2291	0	520	0	520	0	520	0	520	0	520	0	520	0	520	0	520	0	0	520	0
2.2401	0	520	0	520	0	520	0	520	0	520	0	520	0	520	0	520	0	0	520	0
2.2512	0	520	0	520	0	520	0	520	0	520	0	520	0	520	0	520	0	0	520	0
2.2622	0	520	0	520	0	520	0	520	0	520	0	520	0	520	0	520	0	0	520	0
2.2733	0	520	0	520	0	520	0	520	0	520	0	520	0	520	0	520	0	0	520	0
2.2843	0	520	0	520	0	520	0	520	0	520	0	520	0	520	0	520	0	0	520	0
2.2953	0	520	0	520	0	520	0	520	0	520	0	520	0	520	0	520	0	0	520	0
2.3064	0	520	0	520	0	520	0	520	0	520	0	520	0	520	0	520	0	0	520	0
2.3174	0	520	0	520	0	520	0	520	0	520	0	520	0	520	0	520	0	0	520	0
2.3284	0	520	0	520	0	520	0	520	0	520	0	520	0	520	0	520	0	0	520	0
2.3395	0	520	0	520	0	520	0	520	0	520	0	520	0	520	0	520	0	0	520	0
2.3505	0	520	0	520	0	520	0	520	0	520	0	520	0	520	0	520	0	0	520	0
2.3615	0	520	0	520	0	520	0	520	0	520	0	520	0	520	0	520	0	0	520	0
2.3726	0	520	0	520	0	520	0	520	0	520	0	520	0	520	0	520	0	0	520	0
2.3836	0	520	0	520	0	520	0	520	0	520	0	520	0	520	0	520	0	0	520	0
2.3946	0	520	0	520	0	520	0	520	0	520	0	520	0	520	0	520	0	0	520	0
2.4057	0	520	0	520	0	520	0	520	0	520	0	520	0	520	0	520	0	0	520	0
2.4167	0	520	0	520	0	520	0	520	0	520	0	520	0	520	0	520	0	0	520	0
2.4277	0	520	0	520	0	520	0	520	0	520	0	520	0	520	0	520	0	0	520	0
2.4388	0	520	0	520	0	520	0	520	0	520	0	520	0	520	0	520	0	0	520	0
2.4498	0	520	0	520	0	520	0	520	0	520	0	520	0	520	0	520	0	0	520	0
2.4609	0	520	0	520	0	520	0	520	0	520	0	520	0	520	0	520	0	0	520	0
2.4719	0	520	0	520	0	520	0	520	0	520	0	520	0	520	0	520	0	0	520	0
2.4829	0	520	0	520	0	520	0	520	0	520	0	520	0	520	0	520	0	0	520	0
2.494	0	520	0	520	0	520	0	520	0	520	0	520	0	520	0	520	0	0	520	0
2.505	0	520	0	520	0	520	0	520	0	520	0	520	0	520	0	520	0	0	520	0
2.516	0	520	0	520	0	520	0	520	0	520	0	520	0	520	0	520	0	0	520	0
2.5271	0	520	0	520	0	520	0	520	0	520	0	520	0	520	0	520	0	0	520	0
2.5381	0	520	0	520	0	520	0	520	0	520	0	520	0	520	0	520	0	0	520	0
2.5491	0	520	0	520	0	520	0	520	0	520	0	520	0	520	0	520	0	0	520	0
2.5602	0	520	0	520	0	520	0	520	0	520	0	520	0	520	0	520	0	0	520	0
2.5712	0	520	0	520	0	520	0	520	0	520	0	520	0	520	0	520	0	0	520	0
2.5822	0	520	0	520	0	520	0	520	0	520	0	520	0	520	0	520	0	0	520	0
2.5933	0	520	0	520	0	520	0	520	0	520	0	520	0	520	0	520	0	0	520	0
2.6043	0	520	0	520	0	520	0	520	0	520	0	520	0	520	0	520	0	0	520	0
2.6153	0	520	0	520	0	520	0	520	0	520	0	520	0	520	0	520	0	0	520	0
2.6264	0	520	0	520	0	520	0	520	0	520	0	520	0	520	0	520	0	0	520	0
2.6374	0	520	0	520	0	520	0	520	0	520	0	520	0	520	0	520	0	0	520	0
2.6484	0	520	0	520	0	520	0	520	0	520	0	520	0	520	0	520	0	0	520	0
2.6595	0	520	0	520	0	520	0	520	0	520	0	520	0	520	0	520	0	0	520	0
2.6705	0	520	0	520	0	520	0	520	0	520	0	520	0	520	0	520	0	0	520	0
2.6816	0	520	0	520	0	520	0	520	0	520	0	520	0	520	0	520	0	0	520	0
2.6926	0	520	0	520	0	520	0	520	0	520	0	520	0	520	0	520	0	0	520	0
2.7036	0	520	0	520	0	520	0	520	0	520	0	520	0	520	0	520	0	0	520	0
2.7147	0	520	0	520	0	520	0	520	0	520	0	520	0	520	0	520	0	0	520	0
2.7257	0	520	0	520	0	520	0	520	0	520	0	520	0	520	0	520	0	0	520	0
2.7367	0	520	0	520	0	520	0	520	0	520	0	520	0	520	0	520	0	0	520	0
2.7478	0	520	0	520	0	520	0	520	0	520	0	520	0	520	0	520	0	0	520	0
2.7588	0	520	0	520	0	520	0	520	0	520	0	520	0	520	0	520	0	0	520	0
2.7698	0	520	0	520	0	520	0	520	0	520	0	520	0	520	0	520	0	0	520	0
2.7809	0	520	0	520	0	520	0	520	0	520	0	520	0	520	0	520	0	0	520	0
2.7919	0	520	0	520	0	520	0	520	0	520	0	520	0	520	0	520	0	0	520	0
2.8029	0	520	0	520	0	520	0	520	0	520	0	520	0	520	0	520	0	0	520	0
2.814	0	520	0	520	0	520	0	520	0	520	0	520	0	520	0	520	0	0	520	0
2.825	0	520	0	520	0	520	0	520	0	520	0	520	0	520	0	520	0	0	520	0
2.836	0	520	0	520	0	520	0	520	0	520	0	520	0	520	0	520	0	0	520	0
2.8471	0	520	0	520	0	520	0	520	0	520	0	520	0	520	0	520	0	0	520	0
2.8581	0	520	0	520	0	520	0	520	0	520	0	520	0	520	0	520	0	0	520	0
2.8692	0	520	0	520	0	520	0	520	0	520	0	520	0	520	0	520	0	0	520	0
2.8802	0	520	0	520	0	520	0	520	0	520	0	520	0	520	0	520	0	0	520	0
2.8912	0	520	0	520	0	520	0	520	0	520	0	520	0	520	0	520	0	0	520	0
2.9023	0	520	0	520	0	520	0	520	0	520	0	520	0	520	0	520	0	0	520	0
2.9133	0	520	0	520	0	520	0	520	0	520	0	520	0	520	0	520	0	0	520	0
2.9243	0	520	0	520	0	520	0	520	0	520	0	520	0	520	0	520	0	0	520	0
2.9354	0	520	0	520	0	520	0	520	0	520	0	520	0	520	0	520	0	0	520	0
2.9464	0	520	0	520	0	520	0	520	0	520	0	520	0	520	0	520	0	0	520	0
2.9574	0	520	0	520	0	520	0	520	0	520	0	520	0	520	0	520	0	0	520	0
2.9685	0	520	0	520	0	520	0	520	0	520	0	520	0	520	0	520	0	0	520	0
2.9795	0	520	0	520	0	520	0	520	0	520	0	520	0	520	0	520	0	0	520	0
2.9905	0	520	0	520	0	520	0	520	0	520	0	520	0	520	0	520	0	0	520	0
3.0016	0	520	0	520	0	520	0	520	0	520	0	520	0	520	0	520	0	0	520	0
3.0126	0	520	0	520	0	520	0	520	0	520	0	520	0	520	0	520	0	0	520	0
3.0236	0	520	0	520	0	520	0	520	0	520	0	520	0	520	0	520	0	0	520	0
3.0347	0	520	0	520	0	520	0	520	0	520	0	520	0	520	0	520	0	0	520	0
3.0457	0	520	0	520	0	520	0	520	0	520	0	520	0	520	0	520	0	0	520	0
3.0568	0	520	0	520	0	520	0	520	0	520	0	520	0	520	0	520	0	0	520	0
3.0678	0	520	0	520	0	520	0	520	0	520	0	520	0	520	0	520	0	0	520	0
3.0788	0	520	0	520	0	520	0	520	0	520	0	520	0	520	0	520	0	0	520	0
3.0899	0	520	0	520	0	520	0	520	0	520	0	520	0	520	0	520	0	0	520	0
3.1009	0	520	0	520	0	520	0	520	0	520	0	520	0	520	0	520	0	0	520	0
3.1119	0	520	0	520	0	520	0	520	0	520	0	520	0	520	0	520	0	0	520	0
3.123	0	520	0	520	0	520	0	520	0	520	0	520	0	520	0	520	0	0	520	0
3.134	0	520	0	520	0	520	0	520	0	520	0	520	0	520	0	520	0	0	520	0
3.145	0	520	0	520	0	520	0	520	0	520	0	520	0	520	0	520	0	0	520	0
3.1561	0	520	0	520	0	520	0	520	0	520	0	520	0	520	0	520	0	0	520	0
3.1671	0	520	0	520	0	520	0	520	0	520	0	520	0	520	0	520	0	0	520	0
3.1781	0	520	0	520	0	520	0	520	0	520	0	520	0	520	0	520	0	0	520	0
3.1892	0	520	0	520	0	520	0	520	0	520	0	520	0	520	0	520	0	0	520	0
3.2002	0	520	0	520	0	520	0	520	0	520	0	520	0	520	0	520	0	0	520	0
3.2112	0	520	0	520	0	520	0	520	0	520	0	520	0	520	0	520	0	0	520	0
3.2223	0	520	0	520	0	520	0	520	0	520	0	520	0	520	0	520	0	0	520	0
3.2333	0	520	0	520	0	520	0	520	0	520	0	520	0	520	0	520	0	0	520	0
3.2443	0	520	0	520	0	520	0	520	0	520	0	520	0	520	0	520	0	0	520	0
3.2554	0	520	0	520	0	520	0	520	0	520	0	520	0	520	0	520	0	0	520	0
3.2664	0	520	0	520	0	520	0	520	0	520	0	520	0	520	0	520	0	0	520	0
3.2775	0	520	0	520	0	520	0	520	0	520	0	520	0	520	0	520	0	0	520	0
3.2885	0	520	0	520	0	520	0	520	0	520	0	520	0	520	0	520	0	0	520	0
3.2995	0	520	0	520	0	520	0	520	0	520	0	520	0	520	0	520	0	0	520	0
3.3106	0	520	0	520	0	520	0	520	0	520	0	520	0	520	0	520	0	0	520	0
3.3216	0	520	0	520	0	520	0	520	0	520	0	520	0	520	0	520	0	0	520	0
3.3326	0	520	0	520	0	520	0	520	0	520	0	520	0	520	0	520	0	0	520	0
3.3437	0	520	0	520	0	520	0	520	0	520	0	520	0	520	0	520	0	0	520	0
3.3547	0	520	0	520	0	520	0	520	0	520	0	520	0	520	0	520	0	0	520	0
3.3657	0	520	0	520	0	520	0	520	0	520	0	520	0	520	0	520	0	0	520	0
3.3768	0	520	0	520	0	520	0	520	0	520	0	520	0	520	0	520	0	0	520	0
3.3878	0	520	0	520	0	520	0	520	0	520	0	520	0	520	0	520	0	0	520	0
3.3988	0	520	0	520	0	520	0	520	0	520	0	520	0	520	0	520	0	0	520	0
3.4099	0	520	0	520	0	520	0	520	0	520	0	520	0	520	0	520	0	0	520	0
3.4209	0	520	0	520	0	520	0	520	0	520	0	520	0	520	0	520	0	0	520	0
3.4319	0	520	0	520	0	520	0	520	0	520	0	520	0	520	0	520	0	0	520	0
3.443	0	520	0	520	0	520	0	520	0	520	0	520	0	520	0	520	0	0	520	0
3.454	0	520	0	520	0	520	0	520	0	520	0	520	0	520	0	520	0	0	520	0
3.4651	0	520	0	520	0	520	0	520	0	520	0	520	0	520	0	520	0	0	520	0
3.4761	0	520	0	520	0	520	0	520	0	520	0	520	0	520	0	520	0	0	520	0
3.4871	0	520	0	520	0	520	0	520	0	520	0	520	0	520	0	520	0	0	520	0
3.4982	0	520	0	520	0	520	0	520	0	520	0	520	0	520	0	520	0	0	520	0
3.5092	0	520	0	520	0	520	0	520	0	520	0	520	0	520	0	520	0	0	520	0
3.5202	0	520	0	520	0	520	0	520	0	520	0	520	0	520	0	520	0	0	520	0
3.5313	0	520	0	520	0	520	0	520	0	520	0	520	0	520	0	520	0	0	520	0
3.5423	0	520	0	520	0	520	0	520	0	520	0	520	0	520	0	520	0	0	520	0
3.5533	0	520	0	520	0	520	0	520	0	520	0	520	0	520	0	520	0	0	520	0
3.5644	0	520	0	520	0	520	0	520	0	520	0	520	0	520	0	520	0	0	520	0
3.5754	0	520	0	520	0	520	0	520	0	520	0	520	0	520	0	520	0	0	520	0
3.5864	0	520	0	520	0	520	0	520	0	520	0	520	0	520	0	520	0	0	520	0
3.5975	0	520	0	520	0	520	0	520	0	520	0	520	0	520	0	520	0	0	520	0
3.6085	0	520	0	520	0	520	0	520	0	520	0	520	0	520	0	520	0	0	520	0
3.6195	0	520	0	520	0	520	0	520	0	520	0	520	0	520	0	520	0	0	520	0
3.6306	0	520	0	520	0	520	0	520	0	520	0	520	0	520	0	520	0	0	520	0
3.6416	0	520	0	520	0	520	0	520	0	520	0	520	0	520	0	520	0	0	520	0
3.6527	0	520	0	520	0	520	0	520	0	520	0	520	0	520	0	520	0	0	520	0
3.6637	0	520	0	520	0	520	0	520	0	520	0	520	0	520	0	520	0	0	520	0
3.6747	0	520	0	520	0	520	0	520	0	520	0	520	0	520	0	520	0	0	520	0
3.6858	0	520	0	520	0	520	0	520	0	520	0	520	0	520	0	520	0	0	520	0
3.6968	0	520	0	520	0	520	0	520	0	520	0	520	0	520	0	520	0	0	520	0
3.7078	0	520	0	520	0	520	0	520	0	520	0	520	0	520	0	520	0	0	520	0
3.7189	0	520	0	520	0	520	0	520	0	520	0	520	0	520	0	520	0	0	520	0
3.7299	0	520	0	520	0	520	0	520	0	520	0	520	0	520	0	520	0	0	520	0
3.7409	0	520	0	520	0	520	0	520	0	520	0	520	0	520	0	520	0	0	520	0
3.752	0	520	0	520	0	520	0	520	0	520	0	520	0	520	0	520	0	0	520	0
3.763	0	520	0	520	0	520	0	520	0	520	0	520	0	520	0	520	0	0	520	0
3.774	0	520	0	520	0	520	0	520	0	520	0	520	0	520	0	520	0	0	520	0
3.7851	0	520	0	520	0	520	0	520	0	520	0	520	0	520	0	520	0	0	520	0
3.7961	0	520	0	520	0	520	0	520	0	520	0	520	0	520	0	520	0	0	520	0
3.8071	0	520	0	520	0	520	0	520	0	520	0	520	0	520	0	520	0	0	520	0
3.8182	0	520	0	520	0	520	0	520	0	520	0	520	0	520	0	520	0	0	520	0
3.8292	0	520	0	520	0	520	0	520	0	520	0	520	0	520	0	520	0	0	520	0
3.8403	0	520	0	520	0	520	0	520	0	520	0	520	0	520	0	520	0	0	520	0
3.8513	0	520	0	520	0	520	0	520	0	520	0	520	0	520	0	520	0	0	520	0
3.8623	0	520	0	520	0	520	0	520	0	520	0	520	0	520	0	520	0	0	520	0
3.8734	0	520	0	520	0	520	0	520	0	520	0	520	0	520	0	520	0	0	520	0
3.8844	0	520	0	520	0	520	0	520	0	520	0	520	0	520	0	520	0	0	520	0
3.8954	0	520	0	520	0	520	0	520	0	520	0	520	0	520	0	520	0	0	520	0
3.9065	0	520	0	520	0	520	0	520	0	520	0	520	0	520	0	520	0	0	520	0
3.9175	0	520	0	520	0	520	0	520	0	520	0	520	0	520	0	520	0	0	520	0
3.9285	0	520	0	520	0	520	0	520	0	520	0	520	0	520	0	520	0	0	520	0
3.9396	0	520	0	520	0	520	0	520	0	520	0	520	0	520	0	520	0	0	520	0
3.9506	0	520	0	520	0	520	0	520	0	520	0	520	0	520	0	520	0	0	520	0
3.9616	0	520	0	520	0	520	0	520	0	520	0	520	0	520	0	520	0	0	520	0
3.9727	0	520	0	520	0	520	0	520	0	520	0	520	0	520	0	520	0	0	520	0
3.9837	0	520	0	520	0	520	0	520	0	520	0	520	0	520	0	520	0	0	520	0
3.9947	0	520	0	520	0	520	0	520	0	520	0	520	0	520	0	520	0	0	520	0
4.0058	0	520	0	520	0	520	0	520	0	520	0	520	0	520	0	520	0	0	520	0
4.0168	0	520	0	520	0	520	0	520	0	520	0	520	0	520	0	520	0	0	520	0
4.0278	0	520	0	520	0	520	0	520	0	520	0	520	0	520	0	520	0	0	520	0
4.0389	0	520	0	520	0	520	0	520	0	520	0	520	0	520	0	520	0	0	520	0
4.0499	0	520	0	520	0	520	0	520	0	520	0	520	0	520	0	520	0	0	520	0
4.061	0	520	0	520	0	520	0	520	0	520	0	520	0	520	0	520	0	0	520	0
4.072	0	520	0	520	0	520	0	520	0	520	0	520	0	520	0	520	0	0	520	0
4.083	0	520	0	520	0	520	0	520	0	520	0	520	0	520	0	520	0	0	520	0
4.0941	0	520	0	520	0	520	0	520	0	520	0	520	0	520	0	520	0	0	520	0
4.1051	0	520	0	520	0	520	0	520	0	520	0	520	0	520	0	520	0	0	520	0
4.1161	0	520	0	520	0	520	0	520	0	520	0	520	0	520	0	520	0	0	520	0
4.1272	0	520	0	520	0	520	0	520	0	520	0	520	0	520	0	520	0	0	520	0
4.1382	0	520	0	520	0	520	0	520	0	520	0	520	0	520	0	520	0	0	520	0
4.1492	0	520	0	520	0	520	0	520	0	520	0	520	0	520	0	520	0	0	520	0
4.1603	0	520	0	520	0	520	0	520	0	520	0	520	0	520	0	520	0	0	520	0
4.1713	0	520	0	520	0	520	0	520	0	520	0	520	0	520	0	520	0	0	520	0
4.1823	0	520	0	520	0	520	0	520	0	520	0	520	0	520	0	520	0	0	520	0
4.1934	0	520	0	520	0	520	0	520	0	520	0	520	0	520	0	520	0	0	520	0
4.2044	0	520	0	520	0	520	0	520	0	520	0	520	0	520	0	520	0	0	520	0
4.2154	0	520	0	520	0	520	0	520	0	520	0	520	0	520	0	520	0	0	520	0
4.2265	0	520	0	520	0	520	0	520	0	520	0	520	0	520	0	520	0	0	520	0
4.2375	0	520	0	520	0	520	0	520	0	520	0	520	0	520	0	520	0	0	520	0
4.2486	0	520	0	520	0	520	0	520	0	520	0	520	0	520	0	520	0	0	520	0
4.2596	0	520	0	520	0	520	0	520	0	520	0	520	0	520	0	520	0	0	520	0
4.2706	0	520	0	520	0	520	0	520	0	520	0	520	0	520	0	520	0	0	520	0
4.2817	0	520	0	520	0	520	0	520	0	520	0	520	0	520	0	520	0	0	520	0
4.2927	0	520	0	520	0	520	0	520	0	520	0	520	0	520	0	520	0	0	520	0
4.3037	0	520	0	520	0	520	0	520	0	520	0	520	0	520	0	520	0	0	520	0
4.3148	0	520	0	520	0	520	0	520	0	520	0	520	0	520	0	520	0	0	520	0
4.3258	0	520	0	520	0	520	0	520	0	520	0	520	0	520	0	520	0	0	520	0
4.3368	0	520	0	520	0	520	0	520	0	520	0	520	0	520	0	520	0	0	520	0
4.3479	0	520	0	520	0	520	0	520	0	520	0	520	0	520	0	520	0	0	520	0
4.3589	0	520	0	520	0	520	0	520	0	520	0	520	0	520	0	520	0	0	520	0
4.3699	0	520	0	520	0	520	0	520	0	520	0	520	0	520	0	520	0	0	520	0
4.381	0	520	0	520	0	520	0	520	0	520	0	520	0	520	0	520	0	0	520	0
4.392	0	520	0	520	0	520	0	520	0	520	0	520	0	520	0	520	0	0	520	0
4.403	0	520	0	520	0	520	0	520	0	520	0	520	0	520	0	520	0	0	520	0
4.4141	0	520	0	520	0	520	0	520	0	520	0	520	0	520	0	520	0	0	520	0
4.4251	0	520	0	520	0	520	0	520	0	520	0	520	0	520	0	520	0	0	520	0
4.4362	0	520	0	520	0	520	0	520	0	520	0	520	0	520	0	520	0	0	520	0
4.4472	0	520	0	520	0	520	0	520	0	520	0	520	0	520	0	520	0	0	520	0
4.4582	0	520	0	520	0	520	0	520	0	520	0	520	0	520	0	520	0	0	520	0
4.4693	0	520	0	520	0	520	0	520	0	520	0	520	0	520	0	520	0	0	520	0
4.4803	0	520	0	520	0	520	0	520	0	520	0	520	0	520	0	520	0	0	520	0
4.4913	0	520	0	520	0	520	0	520	0	520	0	520	0	520	0	520	0	0	520	0
4.5024	0	520	0	520	0	520	0	520	0	520	0	520	0	520	0	520	0	0	520	0
4.5134	0	520	0	520	0	520	0	520	0	520	0	520	0	520	0	520	0	0	520	0
4.5244	0	520	0	520	0	520	0	520	0	520	0	520	0	520	0	520	0	0	520	0
4.5355	0	520	0	520	0	520	0	520	0	520	0	520	0	520	0	520	0	0	520	0
4.5465	0	520	0	520	0	520	0	520	0	520	0	520	0	520	0	520	0	0	520	0
4.5575	0	520	0	520	0	520	0	520	0	520	0	520	0	520	0	520	0	0	520	0
4.5686	0	520	0	520	0	520	0	520	0	520	0	520	0	520	0	520	0	0	520	0
4.5796	0	520	0	520	0	520	0	520	0	520	0	520	0	520	0	520	0	0	520	0
4.5906	0	520	0	520	0	520	0	520	0	520	0	520	0	520	0	520	0	0	520	0
4.6017	0	520	0	520	0	520	0	520	0	520	0	520	0	520	0	520	0	0	520	0
4.6127	0	520	0	520	0	520	0	520	0	520	0	520	0	520	0	520	0	0	520	0
4.6237	0	520	0	520	0	520	0	520	0	520	0	520	0	520	0	520	0	0	520	0
4.6348	0	520	0	520	0	520	0	520	0	520	0	520	0	520	0	520	0	0	520	0
4.6458	0	520	0	520	0	520	0	520	0	520	0	520	0	520	0	520	0	0	520	0
4.6569	0	520	0	520	0	520	0	520	0	520	0	520	0	520	0	520	0	0	520	0
4.6679	0	520	0	520	0	520	0	520	0	520	0	520	0	520	0	520	0	0	520	0
4.6789	0	520	0	520	0	520	0	520	0	520	0	520	0	520	0	520	0	0	520	0
4.69	0	520	0	520	0	520	0	520	0	520	0	520	0	520	0	520	0	0	520	0
4.701	0	520	0	520	0	520	0	520	0	520	0	520	0	520	0	520	0	0	520	0
4.712	0	520	0	520	0	520	0	520	0	520	0	520	0	520	0	520	0	0	520	0
4.7231	0	520	0	520	0	520	0	520	0	520	0	520	0	520	0	520	0	0	520	0
4.7341	0	520	0	520	0	520	0	520	0	520	0	520	0	520	0	520	0	0	520	0
4.7451	0	520	0	520	0	520	0	520	0	520	0	520	0	520	0	520	0	0	520	0
4.7562	0	520	0	520	0	520	0	520	0	520	0	520	0	520	0	520	0	0	520	0
4.7672	0	520	0	520	0	520	0	520	0	520	0	520	0	520	0	520	0	0	520	0
4.7782	0	520	0	520	0	520	0	520	0	520	0	520	0	520	0	520	0	0	520	0
4.7893	0	520	0	520	0	520	0	520	0	520	0	520	0	520	0	520	0	0	520	0
4.8003	0	520	0	520	0	520	0	520	0	520	0	520	0	520	0	520	0	0	520	0
4.8113	0	520	0	520	0	520	0	520	0	520	0	520	0	520	0	520	0	0	520	0
4.8224	0	520	0	520	0	520	0	520	0	520	0	520	0	520	0	520	0	0	520	0
4.8334	0	520	0	520	0	520	0	520	0	520	0	520	0	520	0	520	0	0	520	0
4.8445	0	520	0	520	0	520	0	520	0	520	0	520	0	520	0	520	0	0	520	0
4.8555	0	520	0	520	0	520	0	520	0	520	0	520	0	520	0	520	0	0	520	0
4.8665	0	520	0	520	0	520	0	520	0	520	0	520	0	520	0	520	0	0	520	0
4.8776	0	520	0	520	0	520	0	520	0	520	0	520	0	520	0	520	0	0	520	0
4.8886	0	520	0	520	0	520	0	520	0	520	0	520	0	520	0	520	0	0	520	0
4.8996	0	520	0	520	0	520	0	520	0	520	0	520	0	520	0	520	0	0	520	0
4.9107	0	520	0	520	0	520	0	520	0	520	0	520	0	520	0	520	0	0	520	0
4.9217	0	520	0	520	0	520	0	520	0	520	0	520	0	520	0	520	0	0	520	0
4.9327	0	520	0	520	0	520	0	520	0	520	0	520	0	520	0	520	0	0	520	0
4.9438	0	520	0	520	0	520	0	520	0	520	0	520	0	520	0	520	0	0	520	0
4.9548	0	520	0	520	0	520	0	520	0	520	0	520	0	520	0	520	0	0	520	0
4.9658	0	520	0	520	0	520	0	520	0	520	0	520	0	520	0	520	0	0	520	0
4.9769	0	520	0	520	0	520	0	520	0	520	0	520	0	520	0	520	0	0	520	0
4.9879	0	520	0	520	0	520	0	520	0	520	0	520	0	520	0	520	0	0	520	0
4.9989	0	520	0	520	0	520	0	520	0	520	0	520	0	520	0	520	0	0	520	0
5.01	0	520	0	520	0	520	0	520	0	520	0	520	0	520	0	520	0	0	520	0
5.021	0	520	0	520	0	520	0	520	0	520	0	520	0	520	0	520	0	0	520	0
5.0321	0	520	0	520	0	520	0	520	0	520	0	520	0	520	0	520	0	0	520	0
5.0431	0	520	0	520	0	520	0	520	0	520	0	520	0	520	0	520	0	0	520	0
5.0541	0	520	0	520	0	520	0	520	0	520	0	520	0	520	0	520	0	0	520	0
5.0652	0	520	0	520	0	520	0	520	0	520	0	520	0	520	0	520	0	0	520	0
5.0762	0	520	0	520	0	520	0	520	0	520	0	520	0	520	0	520	0	0	520	0
5.0872	0	520	0	520	0	520	0	520	0	520	0	520	0	520	0	520	0	0	520	0
5.0983	0	520	0	520	0	520	0	520	0	520	0	520	0	520	0	520	0	0	520	0
5.1093	0	520	0	520	0	520	0	520	0	520	0	520	0	520	0	520	0	0	520	0
5.1203	0	520	0	520	0	520	0	520	0	520	0	520	0	520	0	520	0	0	520	0
5.1314	0	520	0	520	0	520	0	520	0	520	0	520	0	520	0	520	0	0	520	0
5.1424	0	520	0	520	0	520	0	520	0	520	0	520	0	520	0	520	0	0	520	0
5.1534	0	520	0	520	0	520	0	520	0	520	0	520	0	520	0	520	0	0	520	0
5.1645	0	520	0	520	0	520	0	520	0	520	0	520	0	520	0	520	0	0	520	0
5.1755	0	520	0	520	0	520	0	520	0	520	0	520	0	520	0	520	0	0	520	0
5.1865	0	520	0	520	0	520	0	520	0	520	0	520	0	520	0	520	0	0	520	0
5.1976	0	520	0	520	0	520	0	520	0	520	0	520	0	520	0	520	0	0	520	0
5.2086	0	520	0	520	0	520	0	520	0	520	0	520	0	520	0	520	0	0	520	0
5.2197	0	520	0	520	0	520	0	520	0	520	0	520	0	520	0	520	0	0	520	0
5.2307	0	520	0	520	0	520	0	520	0	520	0	520	0	520	0	520	0	0	520	0
5.2417	0	520	0	520	0	520	0	520	0	520	0	520	0	520	0	520	0	0	520	0
5.2528	0	520	0	520	0	520	0	520	0	520	0	520	0	520	0	520	0	0	520	0
5.2638	0	520	0	520	0	520	0	520	0	520	0	520	0	520	0	520	0	0	520	0
5.2748	0	520	0	520	0	520	0	520	0	520	0	520	0	520	0	520	0	0	520	0
5.2859	0	520	0	520	0	520	0	520	0	520	0	520	0	520	0	520	0	0	520	0
5.2969	0	520	0	520	0	520	0	520	0	520	0	520	0	520	0	520	0	0	520	0
5.3079	0	520	0	520	0	520	0	520	0	520	0	520	0	520	0	520	0	0	520	0
5.319	0	520	0	520	0	520	0	520	0	520	0	520	0	520	0	520	0	0	520	0
5.33	0	520	0	520	0	520	0	520	0	520	0	520	0	520	0	520	0	0	520	0
5.341	0	520	0	520	0	520	0	520	0	520	0	520	0	520	0	520	0	0	520	0
5.3521	0	520	0	520	0	520	0	520	0	520	0	520	0	520	0	520	0	0	520	0
5.3631	0	520	0	520	0	520	0	520	0	520	0	520	0	520	0	520	0	0	520	0
5.3741	0	520	0	520	0	520	0	520	0	520	0	520	0	520	0	520	0	0	520	0
5.3852	0	520	0	520	0	520	0	520	0	520	0	520	0	520	0	520	0	0	520	0
5.3962	0	520	0	520	0	520	0	520	0	520	0	520	0	520	0	520	0	0	520	0
5.4072	0	520	0	520	0	520	0	520	0	520	0	520	0	520	0	520	0	0	520	0
5.4183	0	520	0	520	0	520	0	520	0	520	0	520	0	520	0	520	0	0	520	0
5.4293	0	520	0	520	0	520	0	520	0	520	0	520	0	520	0	520	0	0	520	0
5.4404	0	520	0	520	0	520	0	520	0	520	0	520	0	520	0	520	0	0	520	0
5.4514	0	520	0	520	0	520	0	520	0	520	0	520	0	520	0	520	0	0	520	0
5.4624	0	520	0	520	0	520	0	520	0	520	0	520	0	520	0	520	0	0	520	0
5.4735	0	520	0	520	0	520	0	520	0	520	0	520	0	520	0	520	0	0	520	0
5.4845	0	520	0	520	0	520	0	520	0	520	0	520	0	520	0	520	0	0	520	0
5.4955	0	520	0	520	0	520	0	520	0	520	0	520	0	520	0	520	0	0	520	0
5.5066	0	520	0	520	0	520	0	520	0	520	0	520	0	520	0	520	0	0	520	0
5.5176	0	520	0	520	0	520	0	520	0	520	0	520	0	520	0	520	0	0	520	0
5.5286	0	520	0	520	0	520	0	520	0	520	0	520	0	520	0	520	0	0	520	0
5.5397	0	520	0	520	0	520	0	520	0	520	0	520	0	520	0	520	0	0	520	0
5.5507	0	520	0	520	0	520	0	520	0	520	0	520	0	520	0	520	0	0	520	0
5.5617	0	520	0	520	0	520	0	520	0	520	0	520	0	520	0	520	0	0	520	0
5.5728	0	520	0	520	0	520	0	520	0	520	0	520	0	520	0	520	0	0	520	0
5.5838	0	520	0	520	0	520	0	520	0	520	0	520	0	520	0	520	0	0	520	0
5.5948	0	520	0	520	0	520	0	520	0	520	0	520	0	520	0	520	0	0	520	0
5.6059	0	520	0	520	0	520	0	520	0	520	0	520	0	520	0	520	0	0	520	0
5.6169	0	520	0	520	0	520	0	520	0	520	0	520	0	520	0	520	0	0	520	0
5.628	0	520	0	520	0	520	0	520	0	520	0	520	0	520	0	520	0	0	520	0
5.639	0	520	0	520	0	520	0	520	0	520	0	520	0	520	0	520	0	0	520	0
5.65	0	520	0	520	0	520	0	520	0	520	0	520	0	520	0	520	0	0	520	0
5.6611	0	520	0	520	0	520	0	520	0	520	0	520	0	520	0	520	0	0	520	0
5.6721	0	520	0	520	0	520	0	520	0	520	0	520	0	520	0	520	0	0	520	0
5.6831	0	520	0	520	0	520	0	520	0	520	0	520	0	520	0	520	0	0	520	0
5.6942	0	520	0	520	0	520	0	520	0	520	0	520	0	520	0	520	0	0	520	0
5.7052	0	520	0	520	0	520	0	520	0	520	0	520	0	520	0	520	0	0	520	0
5.7162	0	520	0	520	0	520	0	520	0	520	0	520	0	520	0	520	0	0	520	0
5.7273	0	520	0	520	0	520	0	520	0	520	0	520	0	520	0	520	0	0	520	0
5.7383	0	520	0	520	0	520	0	520	0	520	0	520	0	520	0	520	0	0	520	0
5.7493	0	520	0	520	0	520	0	520	0	520	0	520	0	520	0	520	0	0	520	0
5.7604	0	520	0	520	0	520	0	520	0	520	0	520	0	520	0	520	0	0	520	0
5.7714	0	520	0	520	0	520	0	520	0	520	0	520	0	520	0	520	0	0	520	0
5.7824	0	520	0	520	0	520	0	520	0	520	0	520	0	520	0	520	0	0	520	0
5.7935	0	520	0	520	0	520	0	520	0	520	0	520	0	520	0	520	0	0	520	0
5.8045	0	520	0	520	0	520	0	520	0	520	0	520	0	520	0	520	0	0	520	0
5.8156	0	520	0	520	0	520	0	520	0	520	0	520	0	520	0	520	0	0	520	0
5.8266	0	520	0	520	0	520	0	520	0	520	0	520	0	520	0	520	0	0	520	0
5.8376	0	520	0	520	0	520	0	520	0	520	0	520	0	520	0	520	0	0	520	0
5.8487	0	520	0	520	0	520	0	520	0	520	0	520	0	520	0	520	0	0	520	0
5.8597	0	520	0	520	0	520	0	520	0	520	0	520	0	520	0	520	0	0	520	0
5.8707	0	520	0	520	0	520	0	520	0	520	0	520	0	520	0	520	0	0	520	0
5.8818	0	520	0	520	0	520	0	520	0	520	0	520	0	520	0	520	0	0	520	0
5.8928	0	520	0	520	0	520	0	520	0	520	0	520	0	520	0	520	0	0	520	0
5.9038	0	520	0	520	0	520	0	520	0	520	0	520	0	520	0	520	0	0	520	0
5.9149	0	520	0	520	0	520	0	520	0	520	0	520	0	520	0	520	0	0	520	0
5.9259	0	520	0	520	0	520	0	520	0	520	0	520	0	520	0	520	0	0	520	0
5.9369	0	520	0	520	0	520	0	520	0	520	0	520	0	520	0	520	0	0	520	0
5.948	0	520	0	520	0	520	0	520	0	520	0	520	0	520	0	520	0	0	520	0
5.959	0	520	0	520	0	520	0	520	0	520	0	520	0	520	0	520	0	0	520	0
5.97	0	520	0	520	0	520	0	520	0	520	0	520	0	520	0	520	0	0	520	0
5.9811	0	520	0	520	0	520	0	520	0	520	0	520	0	520	0	520	0	0	520	0
5.9921	0	520	0	520	0	520	0	520	0	520	0	520	0	520	0	520	0	0	520	0
6.0032	0	520	0	520	0	520	0	520	0	520	0	520	0	520	0	520	0	0	520	0
6.0142	0	520	0	520	0	520	0	520	0	520	0	520	0	520	0	520	0	0	520	0
6.0252	0	520	0	520	0	520	0	520	0	520	0	520	0	520	0	520	0	0	520	0
6.0363	0	520	0	520	0	520	0	520	0	520	0	520	0	520	0	520	0	0	520	0
6.0473	0	520	0	520	0	520	0	520	0	520	0	520	0	520	0	520	0	0	520	0
6.0583	0	520	0	520	0	520	0	520	0	520	0	520	0	520	0	520	0	0	520	0
6.0694	0	520	0	520	0	520	0	520	0	520	0	520	0	520	0	520	0	0	520	0
6.0804	0	520	0	520	0	520	0	520	0	520	0	520	0	520	0	520	0	0	520	0
6.0914	0	520	0	520	0	520	0	520	0	520	0	520	0	520	0	520	0	0	520	0
6.1025	0	520	0	520	0	520	0	520	0	520	0	520	0	520	0	520	0	0	520	0
6.1135	0	520	0	520	0	520	0	520	0	520	0	520	0	520	0	520	0	0	520	0
6.1245	0	520	0	520	0	520	0	520	0	520	0	520	0	520	0	520	0	0	520	0
6.1356	0	520	0	520	0	520	0	520	0	520	0	520	0	520	0	520	0	0	520	0
6.1466	0	520	0	520	0	520	0	520	0	520	0	520	0	520	0	520	0	0	520	0
6.1576	0	520	0	520	0	520	0	520	0	520	0	520	0	520	0	520	0	0	520	0
6.1687	0	520	0	520	0	520	0	520	0	520	0	520	0	520	0	520	0	0	520	0
6.1797	0	520	0	520	0	520	0	520	0	520	0	520	0	520	0	520	0	0	520	0
6.1907	0	520	0	520	0	520	0	520	0	520	0	520	0	520	0	520	0	0	520	0
6.2018	0	520	0	520	0	520	0	520	0	520	0	520	0	520	0	520	0	0	520	0
6.2128	0	520	0	520	0	520	0	520	0	520	0	520	0	520	0	520	0	0	520	0
6.2239	0	520	0	520	0	520	0	520	0	520	0	520	0	520	0	520	0	0	520	0
6.2349	0	520	0	520	0	520	0	520	0	520	0	520	0	520	0	520	0	0	520	0
6.2459	0	520	0	520	0	520	0	520	0	520	0	520	0	520	0	520	0	0	520	0
6.257	0	520	0	520	0	520	0	520	0	520	0	520	0	520	0	520	0	0	520	0
6.268	0	520	0	520	0	520	0	520	0	520	0	520	0	520	0	520	0	0	520	0
6.279	0	520	0	520	0	520	0	520	0	520	0	520	0	520	0	520	0	0	520	0
6.2901	0	520	0	520	0	520	0	520	0	520	0	520	0	520	0	520	0	0	520	0
6.3011	0	520	0	520	0	520	0	520	0	520	0	520	0	520	0	520	0	0	520	0
6.3121	0	520	0	520	0	520	0	520	0	520	0	520	0	520	0	520	0	0	520	0
6.3232	0	520	0	520	0	520	0	520	0	520	0	520	0	520	0	520	0	0	520	0
6.3342	0	520	0	520	0	520	0	520	0	520	0	520	0	520	0	520	0	0	520	0
6.3452	0	520	0	520	0	520	0	520	0	520	0	520	0	520	0	520	0	0	520	0
6.3563	0	520	0	520	0	520	0	520	0	520	0	520	0	520	0	520	0	0	520	0
6.3673	0	520	0	520	0	520	0	520	0	520	0	520	0	520	0	520	0	0	520	0
6.3783	0	520	0	520	0	520	0	520	0	520	0	520	0	520	0	520	0	0	520	0
6.3894	0	520	0	520	0	520	0	520	0	520	0	520	0	520	0	520	0	0	520	0
6.4004	0	520	0	520	0	520	0	520	0	520	0	520	0	520	0	520	0	0	520	0
6.4115	0	520	0	520	0	520	0	520	0	520	0	520	0	520	0	520	0	0	520	0
6.4225	0	520	0	520	0	520	0	520	0	520	0	520	0	520	0	520	0	0	520	0
6.4335	0	520	0	520	0	520	0	520	0	520	0	520	0	520	0	520	0	0	520	0
6.4446	0	520	0	520	0	520	0	520	0	520	0	520	0	520	0	520	0	0	520	0
6.4556	0	520	0	520	0	520	0	520	0	520	0	520	0	520	0	520	0	0	520	0
6.4666	0	520	0	520	0	520	0	520	0	520	0	520	0	520	0	520	0	0	520	0
6.4777	0	520	0	520	0	520	0	520	0	520	0	520	0	520	0	520	0	0	520	0
6.4887	0	520	0	520	0	520	0	520	0	520	0	520	0	520	0	520	0	0	520	0
6.4997	0	520	0	520	0	520	0	520	0	520	0	520	0	520	0	520	0	0	520	0
6.5108	0	520	0	520	0	520	0	520	0	520	0	520	0	520	0	520	0	0	520	0
6.5218	0	520	0	520	0	520	0	520	0	520	0	520	0	520	0	520	0	0	520	0
6.5328	0	520	0	520	0	520	0	520	0	520	0	520	0	520	0	520	0	0	520	0
6.5439	0	520	0	520	0	520	0	520	0	520	0	520	0	520	0	520	0	0	520	0
6.5549	0	520	0	520	0	520	0	520	0	520	0	520	0	520	0	520	0	0	520	0
6.5659	0	520	0	520	0	520	0	520	0	520	0	520	0	520	0	520	0	0	520	0
6.577	0	520	0	520	0	520	0	520	0	520	0	520	0	520	0	520	0	0	520	0
6.588	0	520	0	520	0	520	0	520	0	520	0	520	0	520	0	520	0	0	520	0
6.5991	0	520	0	520	0	520	0	520	0	520	0	520	0	520	0	520	0	0	520	0
6.6101	0	520	0	520	0	520	0	520	0	520	0	520	0	520	0	520	0	0	520	0
6.6211	0	520	0	520	0	520	0	520	0	520	0	520	0	520	0	520	0	0	520	0
6.6322	0	520	0	520	0	520	0	520	0	520	0	520	0	520	0	520	0	0	520	0
6.6432	0	520	0	520	0	520	0	520	0	520	0	520	0	520	0	520	0	0	520	0
6.6542	0	520	0	520	0	520	0	520	0	520	0	520	0	520	0	520	0	0	520	0
6.6653	0	520	0	520	0	520	0	520	0	520	0	520	0	520	0	520	0	0	520	0
6.6763	0	520	0	520	0	520	0	520	0	520	0	520	0	520	0	520	0	0	520	0
6.6873	0	520	0	520	0	520	0	520	0	520	0	520	0	520	0	520	0	0	520	0
6.6984	0	520	0	520	0	520	0	520	0	520	0	520	0	520	0	520	0	0	520	0
6.7094	0	520	0	520	0	520	0	520	0	520	0	520	0	520	0	520	0	0	520	0
6.7204	0	520	0	520	0	520	0	520	0	520	0	520	0	520	0	520	0	0	520	0
6.7315	0	520	0	520	0	520	0	520	0	520	0	520	0	520	0	520	0	0	520	0
6.7425	0	520	0	520	0	520	0	520	0	520	0	520	0	520	0	520	0	0	520	0
6.7535	0	520	0	520	0	520	0	520	0	520	0	520	0	520	0	520	0	0	520	0
6.7646	0	520	0	520	0	520	0	520	0	520	0	520	0	520	0	520	0	0	520	0
6.7756	0	520	0	520	0	520	0	520	0	520	0	520	0	520	0	520	0	0	520	0
6.7866	0	520	0	520	0	520	0	520	0	520	0	520	0	520	0	520	0	0	520	0
6.7977	0	520	0	520	0	520	0	520	0	520	0	520	0	520	0	520	0	0	520	0
6.8087	0	520	0	520	0	520	0	520	0	520	0	520	0	520	0	520	0	0	520	0
6.8198	0	520	0	520	0	520	0	520	0	520	0	520	0	520	0	520	0	0	520	0
6.8308	0	520	0	520	0	520	0	520	0	520	0	520	0	520	0	520	0	0	520	0
6.8418	0	520	0	520	0	520	0	520	0	520	0	520	0	520	0	520	0	0	520	0
6.8529	0	520	0	520	0	520	0	520	0	520	0	520	0	520	0	520	0	0	520	0
6.8639	0	520	0	520	0	520	0	520	0	520	0	520	0	520	0	520	0	0	520	0
6.8749	0	520	0	520	0	520	0	520	0	520	0	520	0	520	0	520	0	0	520	0
6.886	0	520	0	520	0	520	0	520	0	520	0	520	0	520	0	520	0	0	520	0
6.897	0	520	0	520	0	520	0	520	0	520	0	520	0	520	0	520	0	0	520	0
6.908	0	520	0	520	0	520	0	520	0	520	0	520	0	520	0	520	0	0	520	0
6.9191	0	520	0	520	0	520	0	520	0	520	0	520	0	520	0	520	0	0	520	0
6.9301	0	520	0	520	0	520	0	520	0	520	0	520	0	520	0	520	0	0	520	0
6.9411	0	520	0	520	0	520	0	520	0	520	0	520	0	520	0	520	0	0	520	0
6.9522	0	520	0	520	0	520	0	520	0	520	0	520	0	520	0	520	0	0	520	0
6.9632	0	520	0	520	0	520	0	520	0	520	0	520	0	520	0	520	0	0	520	0
6.9742	0	520	0	520	0	520	0	520	0	520	0	520	0	520	0	520	0	0	520	0
6.9853	0	520	0	520	0	520	0	520	0	520	0	520	0	520	0	520	0	0	520	0
6.9963	0	520	0	520	0	520	0	520	0	520	0	520	0	520	0	520	0	0	520	0
7.0074	0	520	0	520	0	520	0	520	0	520	0	520	0	520	0	520	0	0	520	0
7.0184	0	520	0	520	0	520	0	520	0	520	0	520	0	520	0	520	0	0	520	0
7.0294	0	520	0	520	0	520	0	520	0	520	0	520	0	520	0	520	0	0	520	0
7.0405	0	520	0	520	0	520	0	520	0	520	0	520	0	520	0	520	0	0	520	0
7.0515	0	520	0	520	0	520	0	520	0	520	0	520	0	520	0	520	0	0	520	0
7.0625	0	520	0	520	0	520	0	520	0	520	0	520	0	520	0	520	0	0	520	0
7.0736	0	520	0	520	0	520	0	520	0	520	0	520	0	520	0	520	0	0	520	0
7.0846	0	520	0	520	0	520	0	520	0	520	0	520	0	520	0	520	0	0	520	0
7.0956	0	520	0	520	0	520	0	520	0	520	0	520	0	520	0	520	0	0	520	0
7.1067	0	520	0	520	0	520	0	520	0	520	0	520	0	520	0	520	0	0	520	0
7.1177	0	520	0	520	0	520	0	520	0	520	0	520	0	520	0	520	0	0	520	0
7.1287	0	520	0	520	0	520	0	520	0	520	0	520	0	520	0	520	0	0	520	0
7.1398	0	520	0	520	0	520	0	520	0	520	0	520	0	520	0	520	0	0	520	0
7.1508	0	520	0	520	0	520	0	520	0	520	0	520	0	520	0	520	0	0	520	0
7.1618	0	520	0	520	0	520	0	520	0	520	0	520	0	520	0	520	0	0	520	0
7.1729	0	520	0	520	0	520	0	520	0	520	0	520	0	520	0	520	0	0	520	0
7.1839	0	520	0	520	0	520	0	520	0	520	0	520	0	520	0	520	0	0	520	0
7.195	0	520	0	520	0	520	0	520	0	520	0	520	0	520	0	520	0	0	520	0
7.206	0	520	0	520	0	520	0	520	0	520	0	520	0	520	0	520	0	0	520	0
7.217	0	520	0	520	0	520	0	520	0	520	0	520	0	520	0	520	0	0	520	0
7.2281	0	520	0	520	0	520	0	520	0	520	0	520	0	520	0	520	0	0	520	0
7.2391	0	520	0	520	0	520	0	520	0	520	0	520	0	520	0	520	0	0	520	0
7.2501	0	520	0	520	0	520	0	520	0	520	0	520	0	520	0	520	0	0	520	0
7.2612	0	520	0	520	0	520	0	520	0	520	0	520	0	520	0	520	0	0	520	0
7.2722	0	520	0	520	0	520	0	520	0	520	0	520	0	520	0	520	0	0	520	0
7.2832	0	520	0	520	0	520	0	520	0	520	0	520	0	520	0	520	0	0	520	0
7.2943	0	520	0	520	0	520	0	520	0	520	0	520	0	520	0	520	0	0	520	0
7.3053	0	520	0	520	0	520	0	520	0	520	0	520	0	520	0	520	0	0	520	0
7.3163	0	520	0	520	0	520	0	520	0	520	0	520	0	520	0	520	0	0	520	0
7.3274	0	520	0	520	0	520	0	520	0	520	0	520	0	520	0	520	0	0	520	0
7.3384	0	520	0	520	0	520	0	520	0	520	0	520	0	520	0	520	0	0	520	0
7.3494	0	520	0	520	0	520	0	520	0	520	0	520	0	520	0	520	0	0	520	0
7.3605	0	520	0	520	0	520	0	520	0	520	0	520	0	520	0	520	0	0	520	0
7.3715	0	520	0	520	0	520	0	520	0	520	0	520	0	520	0	520	0	0	520	0
7.3826	0	520	0	520	0	520	0	520	0	520	0	520	0	520	0	520	0	0	520	0
7.3936	0	520	0	520	0	520	0	520	0	520	0	520	0	520	0	520	0	0	520	0
7.4046	0	520	0	520	0	520	0	520	0	520	0	520	0	520	0	520	0	0	520	0
7.4157	0	520	0	520	0	520	0	520	0	520	0	520	0	520	0	520	0	0	520	0
7.4267	0	520	0	520	0	520	0	520	0	520	0	520	0	520	0	520	0	0	520	0
7.4377	0	520	0	520	0	520	0	520	0	520	0	520	0	520	0	520	0	0	520	0
7.4488	0	520	0	520	0	520	0	520	0	520	0	520	0	520	0	520	0	0	520	0
7.4598	0	520	0	520	0	520	0	520	0	520	0	520	0	520	0	520	0	0	520	0
7.4708	0	520	0	520	0	520	0	520	0	520	0	520	0	520	0	520	0	0	520	0
7.4819	0	520	0	520	0	520	0	520	0	520	0	520	0	520	0	520	0	0	520	0
7.4929	0	520	0	520	0	520	0	520	0	520	0	520	0	520	0	520	0	0	520	0
7.5039	0	520	0	520	0	520	0	520	0	520	0	520	0	520	0	520	0	0	520	0
7.515	0	520	0	520	0	520	0	520	0	520	0	520	0	520	0	520	0	0	520	0
7.526	0	520	0	520	0	520	0	520	0	520	0	520	0	520	0	520	0	0	520	0
7.537	0	520	0	520	0	520	0	520	0	520	0	520	0	520	0	520	0	0	520	0
7.5481	0	520	0	520	0	520	0	520	0	520	0	520	0	520	0	520	0	0	520	0
7.5591	0	520	0	520	0	520	0	520	0	520	0	520	0	520	0	520	0	0	520	0
7.5701	0	520	0	520	0	520	0	520	0	520	0	520	0	520	0	520	0	0	520	0
7.5812	0	520	0	520	0	520	0	520	0	520	0	520	0	520	0	520	0	0	520	0
7.5922	0	520	0	520	0	520	0	520	0	520	0	520	0	520	0	520	0	0	520	0
7.6033	0	520	0	520	0	520	0	520	0	520	0	520	0	520	0	520	0	0	520	0
7.6143	0	520	0	520	0	520	0	520	0	520	0	520	0	520	0	520	0	0	520	0
7.6253	0	520	0	520	0	520	0	520	0	520	0	520	0	520	0	520	0	0	520	0
7.6364	0	520	0	520	0	520	0	520	0	520	0	520	0	520	0	520	0	0	520	0
7.6474	0	520	0	520	0	520	0	520	0	520	0	520	0	520	0	520	0	0	520	0
7.6584	0	520	0	520	0	520	0	520	0	520	0	520	0	520	0	520	0	0	520	0
7.6695	0	520	0	520	0	520	0	520	0	520	0	520	0	520	0	520	0	0	520	0
7.6805	0	520	0	520	0	520	0	520	0	520	0	520	0	520	0	520	0	0	520	0
7.6915	0	520	0	520	0	520	0	520	0	520	0	520	0	520	0	520	0	0	520	0
7.7026	0	520	0	520	0	520	0	520	0	520	0	520	0	520	0	520	0	0	520	0
7.7136	0	520	0	520	0	520	0	520	0	520	0	520	0	520	0	520	0	0	520	0
7.7246	0	520	0	520	0	520	0	520	0	520	0	520	0	520	0	520	0	0	520	0
7.7357	0	520	0	520	0	520	0	520	0	520	0	520	0	520	0	520	0	0	520	0
7.7467	0	520	0	520	0	520	0	520	0	520	0	520	0	520	0	520	0	0	520	0
7.7577	0	520	0	520	0	520	0	520	0	520	0	520	0	520	0	520	0	0	520	0
7.7688	0	520	0	520	0	520	0	520	0	520	0	520	0	520	0	520	0	0	520	0
7.7798	0	520	0	520	0	520	0	520	0	520	0	520	0	520	0	520	0	0	520	0
7.7909	0	520	0	520	0	520	0	520	0	520	0	520	0	520	0	520	0	0	520	0
7.8019	0	520	0	520	0	520	0	520	0	520	0	520	0	520	0	520	0	0	520	0
7.8129	0	520	0	520	0	520	0	520	0	520	0	520	0	520	0	520	0	0	520	0
7.824	0	520	0	520	0	520	0	520	0	520	0	520	0	520	0	520	0	0	520	0
7.835	0	520	0	520	0	520	0	520	0	520	0	520	0	520	0	520	0	0	520	0
7.846	0	520	0	520	0	520	0	520	0	520	0	520	0	520	0	520	0	0	520	0
7.8571	0	520	0	520	0	520	0	520	0	520	0	520	0	520	0	520	0	0	520	0
7.8681	0	520	0	520	0	520	0	520	0	520	0	520	0	520	0	520	0	0	520	0
7.8791	0	520	0	520	0	520	0	520	0	520	0	520	0	520	0	520	0	0	520	0
7.8902	0	520	0	520	0	520	0	520	0	520	0	520	0	520	0	520	0	0	520	0
7.9012	0	520	0	520	0	520	0	520	0	520	0	520	0	520	0	520	0	0	520	0
7.9122	0	520	0	520	0	520	0	520	0	520	0	520	0	520	0	520	0	0	520	0
7.9233	0	520	0	520	0	520	0	520	0	520	0	520	0	520	0	520	0	0	520	0
7.9343	0	520	0	520	0	520	0	520	0	520	0	520	0	520	0	520	0	0	520	0
7.9453	0	520	0	520	0	520	0	520	0	520	0	520	0	520	0	520	0	0	520	0
7.9564	0	520	0	520	0	520	0	520	0	520	0	520	0	520	0	520	0	0	520	0
7.9674	0	520	0	520	0	520	0	520	0	520	0	520	0	520	0	520	0	0	520	0
7.9785	0	520	0	520	0	520	0	520	0	520	0	520	0	520	0	520	0	0	520	0
7.9895	0	520	0	520	0	520	0	520	0	520	0	520	0	520	0	520	0	0	520	0
8.0005	0	520	0	520	0	520	0	520	0	520	0	520	0	520	0	520	0	0	520	0
8.0116	0	520	0	520	0	520	0	520	0	520	0	520	0	520	0	520	0	0	520	0
8.0226	0	520	0	520	0	520	0	520	0	520	0	520	0	520	0	520	0	0	520	0
8.0336	0	520	0	520	0	520	0	520	0	520	0	520	0	520	0	520	0	0	520	0
8.0447	0	520	0	520	0	520	0	520	0	520	0	520	0	520	0	520	0	0	520	0
8.0557	0	520	0	520	0	520	0	520	0	520	0	520	0	520	0	520	0	0	520	0
8.0667	0	520	0	520	0	520	0	520	0	520	0	520	0	520	0	520	0	0	520	0
8.0778	0	520	0	520	0	520	0	520	0	520	0	520	0	520	0	520	0	0	520	0
8.0888	0	520	0	520	0	520	0	520	0	520	0	520	0	520	0	520	0	0	520	0
8.0998	0	520	0	520	0	520	0	520	0	520	0	520	0	520	0	520	0	0	520	0
8.1109	0	520	0	520	0	520	0	520	0	520	0	520	0	520	0	520	0	0	520	0
8.1219	0	520	0	520	0	520	0	520	0	520	0	520	0	520	0	520	0	0	520	0
8.1329	0	520	0	520	0	520	0	520	0	520	0	520	0	520	0	520	0	0	520	0
8.144	0	520	0	520	0	520	0	520	0	520	0	520	0	520	0	520	0	0	520	0
8.155	0	520	0	520	0	520	0	520	0	520	0	520	0	520	0	520	0	0	520	0
8.166	0	520	0	520	0	520	0	520	0	520	0	520	0	520	0	520	0	0	520	0
8.1771	0	520	0	520	0	520	0	520	0	520	0	520	0	520	0	520	0	0	520	0
8.1881	0	520	0	520	0	520	0	520	0	520	0	520	0	520	0	520	0	0	520	0
8.1992	0	520	0	520	0	520	0	520	0	520	0	520	0	520	0	520	0	0	520	0
8.2102	0	520	0	520	0	520	0	520	0	520	0	520	0	520	0	520	0	0	520	0
8.2212	0	520	0	520	0	520	0	520	0	520	0	520	0	520	0	520	0	0	520	0
8.2323	0	520	0	520	0	520	0	520	0	520	0	520	0	520	0	520	0	0	520	0
8.2433	0	520	0	520	0	520	0	520	0	520	0	520	0	520	0	520	0	0	520	0
8.2543	0	520	0	520	0	520	0	520	0	520	0	520	0	520	0	520	0	0	520	0
8.2654	0	520	0	520	0	520	0	520	0	520	0	520	0	520	0	520	0	0	520	0
8.2764	0	520	0	520	0	520	0	520	0	520	0	520	0	520	0	520	0	0	520	0
8.2874	0	520	0	520	0	520	0	520	0	520	0	520	0	520	0	520	0	0	520	0
8.2985	0	520	0	520	0	520	0	520	0	520	0	520	0	520	0	520	0	0	520	0
8.3095	0	520	0	520	0	520	0	520	0	520	0	520	0	520	0	520	0	0	520	0
8.3205	0	520	0	520	0	520	0	520	0	520	0	520	0	520	0	520	0	0	520	0
8.3316	0	520	0	520	0	520	0	520	0	520	0	520	0	520	0	520	0	0	520	0
8.3426	0	520	0	520	0	520	0	520	0	520	0	520	0	520	0	520	0	0	520	0
8.3536	0	520	0	520	0	520	0	520	0	520	0	520	0	520	0	520	0	0	520	0
8.3647	0	520	0	520	0	520	0	520	0	520	0	520	0	520	0	520	0	0	520	0
8.3757	0	520	0	520	0	520	0	520	0	520	0	520	0	520	0	520	0	0	520	0
8.3868	0	520	0	520	0	520	0	520	0	520	0	520	0	520	0	520	0	0	520	0
8.3978	0	520	0	520	0	520	0	520	0	520	0	520	0	520	0	520	0	0	520	0
8.4088	0	520	0	520	0	520	0	520	0	520	0	520	0	520	0	520	0	0	520	0
8.4199	0	520	0	520	0	520	0	520	0	520	0	520	0	520	0	520	0	0	520	0
8.4309	0	520	0	520	0	520	0	520	0	520	0	520	0	520	0	520	0	0	520	0
8.4419	0	520	0	520	0	520	0	520	0	520	0	520	0	520	0	520	0	0	520	0
8.453	0	520	0	520	0	520	0	520	0	520	0	520	0	520	0	520	0	0	520	0
8.464	0	520	0	520	0	520	0	520	0	520	0	520	0	520	0	520	0	0	520	0
8.475	0	520	0	520	0	520	0	520	0	520	0	520	0	520	0	520	0	0	520	0
8.4861	0	520	0	520	0	520	0	520	0	520	0	520	0	520	0	520	0	0	520	0
8.4971	0	520	0	520	0	520	0	520	0	520	0	520	0	520	0	520	0	0	520	0
8.5081	0	520	0	520	0	520	0	520	0	520	0	520	0	520	0	520	0	0	520	0
8.5192	0	520	0	520	0	520	0	520	0	520	0	520	0	520	0	520	0	0	520	0
8.5302	0	520	0	520	0	520	0	520	0	520	0	520	0	520	0	520	0	0	520	0
8.5412	0	520	0	520	0	520	0	520	0	520	0	520	0	520	0	520	0	0	520	0
8.5523	0	520	0	520	0	520	0	520	0	520	0	520	0	520	0	520	0	0	520	0
8.5633	0	520	0	520	0	520	0	520	0	520	0	520	0	520	0	520	0	0	520	0
8.5744	0	520	0	520	0	520	0	520	0	520	0	520	0	520	0	520	0	0	520	0
8.5854	0	520	0	520	0	520	0	520	0	520	0	520	0	520	0	520	0	0	520	0
8.5964	0	520	0	520	0	520	0	520	0	520	0	520	0	520	0	520	0	0	520	0
8.6075	0	520	0	520	0	520	0	520	0	520	0	520	0	520	0	520	0	0	520	0
8.6185	0	520	0	520	0	520	0	520	0	520	0	520	0	520	0	520	0	0	520	0
8.6295	0	520	0	520	0	520	0	520	0	520	0	520	0	520	0	520	0	0	520	0
8.6406	0	520	0	520	0	520	0	520	0	520	0	520	0	520	0	520	0	0	520	0
8.6516	0	520	0	520	0	520	0	520	0	520	0	520	0	520	0	520	0	0	520	0
8.6626	0	520	0	520	0	520	0	520	0	520	0	520	0	520	0	520	0	0	520	0
8.6737	0	520	0	520	0	520	0	520	0	520	0	520	0	520	0	520	0	0	520	0
8.6847	0	520	0	520	0	520	0	520	0	520	0	520	0	520	0	520	0	0	520	0
8.6957	0	520	0	520	0	520	0	520	0	520	0	520	0	520	0	520	0	0	520	0
8.7068	0	520	0	520	0	520	0	520	0	520	0	520	0	520	0	520	0	0	520	0
8.7178	0	520	0	520	0	520	0	520	0	520	0	520	0	520	0	520	0	0	520	0
8.7288	0	520	0	520	0	520	0	520	0	520	0	520	0	520	0	520	0	0	520	0
8.7399	0	520	0	520	0	520	0	520	0	520	0	520	0	520	0	520	0	0	520	0
8.7509	0	520	0	520	0	520	0	520	0	520	0	520	0	520	0	520	0	0	520	0
8.762	0	520	0	520	0	520	0	520	0	520	0	520	0	520	0	520	0	0	520	0
8.773	0	520	0	520	0	520	0	520	0	520	0	520	0	520	0	520	0	0	520	0
8.784	0	520	0	520	0	520	0	520	0	520	0	520	0	520	0	520	0	0	520	0
8.7951	0	520	0	520	0	520	0	520	0	520	0	520	0	520	0	520	0	0	520	0
8.8061	0	520	0	520	0	520	0	520	0	520	0	520	0	520	0	520	0	0	520	0
8.8171	0	520	0	520	0	520	0	520	0	520	0	520	0	520	0	520	0	0	520	0
8.8282	0	520	0	520	0	520	0	520	0	520	0	520	0	520	0	520	0	0	520	0
8.8392	0	520	0	520	0	520	0	520	0	520	0	520	0	520	0	520	0	0	520	0
8.8502	0	520	0	520	0	520	0	520	0	520	0	520	0	520	0	520	0	0	520	0
8.8613	0	520	0	520	0	520	0	520	0	520	0	520	0	520	0	520	0	0	520	0
8.8723	0	520	0	520	0	520	0	520	0	520	0	520	0	520	0	520	0	0	520	0
8.8833	0	520	0	520	0	520	0	520	0	520	0	520	0	520	0	520	0	0	520	0
8.8944	0	520	0	520	0	520	0	520	0	520	0	520	0	520	0	520	0	0	520	0
8.9054	0	520	0	520	0	520	0	520	0	520	0	520	0	520	0	520	0	0	520	0
8.9164	0	520	0	520	0	520	0	520	0	520	0	520	0	520	0	520	0	0	520	0
8.9275	0	520	0	520	0	520	0	520	0	520	0	520	0	520	0	520	0	0	520	0
8.9385	0	520	0	520	0	520	0	520	0	520	0	520	0	520	0	520	0	0	520	0
8.9495	0	520	0	520	0	520	0	520	0	520	0	520	0	520	0	520	0	0	520	0
8.9606	0	520	0	520	0	520	0	520	0	520	0	520	0	520	0	520	0	0	520	0
8.9716	0	520	0	520	0	520	0	520	0	520	0	520	0	520	0	520	0	0	520	0
8.9827	0	520	0	520	0	520	0	520	0	520	0	520	0	520	0	520	0	0	520	0
8.9937	0	520	0	520	0	520	0	520	0	520	0	520	0	520	0	520	0	0	520	0
9.0047	0	520	0	520	0	520	0	520	0	520	0	520	0	520	0	520	0	0	520	0
9.0158	0	520	0	520	0	520	0	520	0	520	0	520	0	520	0	520	0	0	520	0
9.0268	0	520	0	520	0	520	0	520	0	520	0	520	0	520	0	520	0	0	520	0
9.0378	0	520	0	520	0	520	0	520	0	520	0	520	0	520	0	520	0	0	520	0
9.0489	0	520	0	520	0	520	0	520	0	520	0	520	0	520	0	520	0	0	520	0
9.0599	0	520	0	520	0	520	0	520	0	520	0	520	0	520	0	520	0	0	520	0
9.0709	0	520	0	520	0	520	0	520	0	520	0	520	0	520	0	520	0	0	520	0
9.082	0	520	0	520	0	520	0	520	0	520	0	520	0	520	0	520	0	0	520	0
9.093	0	520	0	520	0	520	0	520	0	520	0	520	0	520	0	520	0	0	520	0
9.104	0	520	0	520	0	520	0	520	0	520	0	520	0	520	0	520	0	0	520	0
9.1151	0	520	0	520	0	520	0	520	0	520	0	520	0	520	0	520	0	0	520	0
9.1261	0	520	0	520	0	520	0	520	0	520	0	520	0	520	0	520	0	0	520	0
9.1371	0	520	0	520	0	520	0	520	0	520	0	520	0	520	0	520	0	0	520	0
9.1482	0	520	0	520	0	520	0	520	0	520	0	520	0	520	0	520	0	0	520	0
9.1592	0	520	0	520	0	520	0	520	0	520	0	520	0	520	0	520	0	0	520	0
9.1703	0	520	0	520	0	520	0	520	0	520	0	520	0	520	0	520	0	0	520	0
9.1813	0	520	0	520	0	520	0	520	0	520	0	520	0	520	0	520	0	0	520	0
9.1923	0	520	0	520	0	520	0	520	0	520	0	520	0	520	0	520	0	0	520	0
9.2034	0	520	0	520	0	520	0	520	0	520	0	520	0	520	0	520	0	0	520	0
9.2144	0	520	0	520	0	520	0	520	0	520	0	520	0	520	0	520	0	0	520	0
9.2254	0	520	0	520	0	520	0	520	0	520	0	520	0	520	0	520	0	0	520	0
9.2365	0	520	0	520	0	520	0	520	0	520	0	520	0	520	0	520	0	0	520	0
9.2475	0	520	0	520	0	520	0	520	0	520	0	520	0	520	0	520	0	0	520	0
9.2585	0	520	0	520	0	520	0	520	0	520	0	520	0	520	0	520	0	0	520	0
9.2696	0	520	0	520	0	520	0	520	0	520	0	520	0	520	0	520	0	0	520	0
9.2806	0	520	0	520	0	520	0	520	0	520	0	520	0	520	0	520	0	0	520	0
9.2916	0	520	0	520	0	520	0	520	0	520	0	520	0	520	0	520	0	0	520	0
9.3027	0	520	0	520	0	520	0	520	0	520	0	520	0	520	0	520	0	0	520	0
9.3137	0	520	0	520	0	520	0	520	0	520	0	520	0	520	0	520	0	0	520	0
9.3247	0	520	0	520	0	520	0	520	0	520	0	520	0	520	0	520	0	0	520	0
9.3358	0	520	0	520	0	520	0	520	0	520	0	520	0	520	0	520	0	0	520	0
9.3468	0	520	0	520	0	520	0	520	0	520	0	520	0	520	0	520	0	0	520	0
9.3579	0	520	0	520	0	520	0	520	0	520	0	520	0	520	0	520	0	0	520	0
9.3689	0	520	0	520	0	520	0	520	0	520	0	520	0	520	0	520	0	0	520	0
9.3799	0	520	0	520	0	520	0	520	0	520	0	520	0	520	0	520	0	0	520	0
9.391	0	520	0	520	0	520	0	520	0	520	0	520	0	520	0	520	0	0	520	0
9.402	0	520	0	520	0	520	0	520	0	520	0	520	0	520	0	520	0	0	520	0
9.413	0	520	0	520	0	520	0	520	0	520	0	520	0	520	0	520	0	0	520	0
9.4241	0	520	0	520	0	520	0	520	0	520	0	520	0	520	0	520	0	0	520	0
9.4351	0	520	0	520	0	520	0	520	0	520	0	520	0	520	0	520	0	0	520	0
9.4461	0	520	0	520	0	520	0	520	0	520	0	520	0	520	0	520	0	0	520	0
9.4572	0	520	0	520	0	520	0	520	0	520	0	520	0	520	0	520	0	0	520	0
9.4682	0	520	0	520	0	520	0	520	0	520	0	520	0	520	0	520	0	0	520	0
9.4792	0	520	0	520	0	520	0	520	0	520	0	520	0	520	0	520	0	0	520	0
9.4903	0	520	0	520	0	520	0	520	0	520	0	520	0	520	0	520	0	0	520	0
9.5013	0	520	0	520	0	520	0	520	0	520	0	520	0	520	0	520	0	0	520	0
9.5123	0	520	0	520	0	520	0	520	0	520	0	520	0	520	0	520	0	0	520	0
9.5234	0	520	0	520	0	520	0	520	0	520	0	520	0	520	0	520	0	0	520	0
9.5344	0	520	0	520	0	520	0	520	0	520	0	520	0	520	0	520	0	0	520	0
9.5455	0	520	0	520	0	520	0	520	0	520	0	520	0	520	0	520	0	0	520	0
9.5565	0	520	0	520	0	520	0	520	0	520	0	520	0	520	0	520	0	0	520	0
9.5675	0	520	0	520	0	520	0	520	0	520	0	520	0	520	0	520	0	0	520	0
9.5786	0	520	0	520	0	520	0	520	0	520	0	520	0	520	0	520	0	0	520	0
9.5896	0	520	0	520	0	520	0	520	0	520	0	520	0	520	0	520	0	0	520	0
9.6006	0	520	0	520	0	520	0	520	0	520	0	520	0	520	0	520	0	0	520	0
9.6117	0	520	0	520	0	520	0	520	0	520	0	520	0	520	0	520	0	0	520	0
9.6227	0	520	0	520	0	520	0	520	0	520	0	520	0	520	0	520	0	0	520	0
9.6337	0	520	0	520	0	520	0	520	0	520	0	520	0	520	0	520	0	0	520	0
9.6448	0	520	0	520	0	520	0	520	0	520	0	520	0	520	0	520	0	0	520	0
9.6558	0	520	0	520	0	520	0	520	0	520	0	520	0	520	0	520	0	0	520	0
9.6668	0	520	0	520	0	520	0	520	0	520	0	520	0	520	0	520	0	0	520	0
9.6779	0	520	0	520	0	520	0	520	0	520	0	520	0	520	0	520	0	0	520	0
9.6889	0	520	0	520	0	520	0	520	0	520	0	520	0	520	0	520	0	0	520	0
9.6999	0	520	0	520	0	520	0	520	0	520	0	520	0	520	0	520	0	0	520	0
9.711	0	520	0	520	0	520	0	520	0	520	0	520	0	520	0	520	0	0	520	0
9.722	0	520	0	520	0	520	0	520	0	520	0	520	0	520	0	520	0	0	520	0
9.733	0	520	0	520	0	520	0	520	0	520	0	520	0	520	0	520	0	0	520	0
9.7441	0	520	0	520	0	520	0	520	0	520	0	520	0	520	0	520	0	0	520	0
9.7551	0	520	0	520	0	520	0	520	0	520	0	520	0	520	0	520	0	0	520	0
9.7662	0	520	0	520	0	520	0	520	0	520	0	520	0	520	0	520	0	0	520	0
9.7772	0	520	0	520	0	520	0	520	0	520	0	520	0	520	0	520	0	0	520	0
9.7882	0	520	0	520	0	520	0	520	0	520	0	520	0	520	0	520	0	0	520	0
9.7993	0	520	0	520	0	520	0	520	0	520	0	520	0	520	0	520	0	0	520	0
9.8103	0	520	0	520	0	520	0	520	0	520	0	520	0	520	0	520	0	0	520	0
9.8213	0	520	0	520	0	520	0	520	0	520	0	520	0	520	0	520	0	0	520	0
9.8324	0	520	0	520	0	520	0	520	0	520	0	520	0	520	0	520	0	0	520	0
9.8434	0	520	0	520	0	520	0	520	0	520	0	520	0	520	0	520	0	0	520	0
9.8544	0	520	0	520	0	520	0	520	0	520	0	520	0	520	0	520	0	0	520	0
9.8655	0	520	0	520	0	520	0	520	0	520	0	520	0	520	0	520	0	0	520	0
9.8765	0	520	0	520	0	520	0	520	0	520	0	520	0	520	0	520	0	0	520	0
9.8875	0	520	0	520	0	520	0	520	0	520	0	520	0	520	0	520	0	0	520	0
9.8986	0	520	0	520	0	520	0	520	0	520	0	520	0	520	0	520	0	0	520	0
9.9096	0	520	0	520	0	520	0	520	0	520	0	520	0	520	0	520	0	0	520	0
9.9206	0	520	0	520	0	520	0	520	0	520	0	520	0	520	0	520	0	0	520	0
9.9317	0	520	0	520	0	520	0	520	0	520	0	520	0	520	0	520	0	0	520	0
9.9427	0	520	0	520	0	520	0	520	0	520	0	520	0	520	0	520	0	0	520	0
9.9538	0	520	0	520	0	520	0	520	0	520	0	520	0	520	0	520	0	0	520	0
9.9648	0	520	0	520	0	520	0	520	0	520	0	520	0	520	0	520	0	0	520	0
9.9758	0	520	0	520	0	520	0	520	0	520	0	520	0	520	0	520	0	0	520	0
9.9869	0	520	0	520	0	520	0	520	0	520	0	520	0	520	0	520	0	0	520	0
9.9979	0	520	0	520	0	520	0	520	0	520	0	520	0	520	0	520	0	0	520	0
10.0089	0	520	0	520	0	520	0	520	0	520	0	520	0	520	0	520	0	0	520	0
10.02	0	520	0	520	0	520	0	520	0	520	0	520	0	520	0	520	0	0	520	0
10.031	0	520	0	520	0	520	0	520	0	520	0	520	0	520	0	520	0	0	520	0
10.042	0	520	0	520	0	520	0	520	0	520	0	520	0	520	0	520	0	0	520	0
10.0531	0	520	0	520	0	520	0	520	0	520	0	520	0	520	0	520	0	0	520	0
10.0641	0	520	0	520	0	520	0	520	0	520	0	520	0	520	0	520	0	0	520	0
10.0751	0	520	0	520	0	520	0	520	0	520	0	520	0	520	0	520	0	0	520	0
10.0862	0	520	0	520	0	520	0	520	0	520	0	520	0	520	0	520	0	0	520	0
10.0972	0	520	0	520	0	520	0	520	0	520	0	520	0	520	0	520	0	0	520	0
10.1082	0	520	0	520	0	520	0	520	0	520	0	520	0	520	0	520	0	0	520	0
10.1193	0	520	0	520	0	520	0	520	0	520	0	520	0	520	0	520	0	0	520	0
10.1303	0	520	0	520	0	520	0	520	0	520	0	520	0	520	0	520	0	0	520	0
10.1414	0	520	0	520	0	520	0	520	0	520	0	520	0	520	0	520	0	0	520	0
10.1524	0	520	0	520	0	520	0	520	0	520	0	520	0	520	0	520	0	0	520	0
10.1634	0	520	0	520	0	520	0	520	0	520	0	520	0	520	0	520	0	0	520	0
10.1745	0	520	0	520	0	520	0	520	0	520	0	520	0	520	0	520	0	0	520	0
10.1855	0	520	0	520	0	520	0	520	0	520	0	520	0	520	0	520	0	0	520	0
10.1965	0	520	0	520	0	520	0	520	0	520	0	520	0	520	0	520	0	0	520	0
10.2076	0	520	0	520	0	520	0	520	0	520	0	520	0	520	0	520	0	0	520	0
10.2186	0	520	0	520	0	520	0	520	0	520	0	520	0	520	0	520	0	0	520	0
10.2296	0	520	0	520	0	520	0	520	0	520	0	520	0	520	0	520	0	0	520	0
10.2407	0	520	0	520	0	520	0	520	0	520	0	520	0	520	0	520	0	0	520	0
10.2517	0	520	0	520	0	520	0	520	0	520	0	520	0	520	0	520	0	0	520	0
10.2627	0	520	0	520	0	520	0	520	0	520	0	520	0	520	0	520	0	0	520	0
10.2738	0	520	0	520	0	520	0	520	0	520	0	520	0	520	0	520	0	0	520	0
10.2848	0	520	0	520	0	520	0	520	0	520	0	520	0	520	0	520	0	0	520	0
10.2958	0	520	0	520	0	520	0	520	0	520	0	520	0	520	0	520	0	0	520	0
10.3069	0	520	0	520	0	520	0	520	0	520	0	520	0	520	0	520	0	0	520	0
10.3179	0	520	0	520	0	520	0	520	0	520	0	520	0	520	0	520	0	0	520	0
10.3289	0	520	0	520	0	520	0	520	0	520	0	520	0	520	0	520	0	0	520	0
10.34	0	520	0	520	0	520	0	520	0	520	0	520	0	520	0	520	0	0	520	0
10.351	0	520	0	520	0	520	0	520	0	520	0	520	0	520	0	520	0	0	520	0
10.3621	0	520	0	520	0	520	0	520	0	520	0	520	0	520	0	520	0	0	520	0
10.3731	0	520	0	520	0	520	0	520	0	520	0	520	0	520	0	520	0	0	520	0
10.3841	0	520	0	520	0	520	0	520	0	520	0	520	0	520	0	520	0	0	520	0
10.3952	0	520	0	520	0	520	0	520	0	520	0	520	0	520	0	520	0	0	520	0
10.4062	0	520	0	520	0	520	0	520	0	520	0	520	0	520	0	520	0	0	520	0
10.4172	0	520	0	520	0	520	0	520	0	520	0	520	0	520	0	520	0	0	520	0
10.4283	0	520	0	520	0	520	0	520	0	520	0	520	0	520	0	520	0	0	520	0
10.4393	0	520	0	520	0	520	0	520	0	520	0	520	0	520	0	520	0	0	520	0
10.4503	0	520	0	520	0	520	0	520	0	520	0	520	0	520	0	520	0	0	520	0
10.4614	0	520	0	520	0	520	0	520	0	520	0	520	0	520	0	520	0	0	520	0
10.4724	0	520	0	520	0	520	0	520	0	520	0	520	0	520	0	520	0	0	520	0
10.4834	0	520	0	520	0	520	0	520	0	520	0	520	0	520	0	520	0	0	520	0
10.4945	0	520	0	520	0	520	0	520	0	520	0	520	0	520	0	520	0	0	520	0
10.5055	0	520	0	520	0	520	0	520	0	520	0	520	0	520	0	520	0	0	520	0
10.5165	0	520	0	520	0	520	0	520	0	520	0	520	0	520	0	520	0	0	520	0
10.5276	0	520	0	520	0	520	0	520	0	520	0	520	0	520	0	520	0	0	520	0
10.5386	0	520	0	520	0	520	0	520	0	520	0	520	0	520	0	520	0	0	520	0
10.5497	0	520	0	520	0	520	0	520	0	520	0	520	0	520	0	520	0	0	520	0
10.5607	0	520	0	520	0	520	0	520	0	520	0	520	0	520	0	520	0	0	520	0
10.5717	0	520	0	520	0	520	0	520	0	520	0	520	0	520	0	520	0	0	520	0
10.5828	0	520	0	520	0	520	0	520	0	520	0	520	0	520	0	520	0	0	520	0
10.5938	0	520	0	520	0	520	0	520	0	520	0	520	0	520	0	520	0	0	520	0
10.6048	0	520	0	520	0	520	0	520	0	520	0	520	0	520	0	520	0	0	520	0
10.6159	0	520	0	520	0	520	0	520	0	520	0	520	0	520	0	520	0	0	520	0
10.6269	0	520	0	520	0	520	0	520	0	520	0	520	0	520	0	520	0	0	520	0
10.6379	0	520	0	520	0	520	0	520	0	520	0	520	0	520	0	520	0	0	520	0
10.649	0	520	0	520	0	520	0	520	0	520	0	520	0	520	0	520	0	0	520	0
10.66	0	520	0	520	0	520	0	520	0	520	0	520	0	520	0	520	0	0	520	0
10.671	0	520	0	520	0	520	0	520	0	520	0	520	0	520	0	520	0	0	520	0
10.6821	0	520	0	520	0	520	0	520	0	520	0	520	0	520	0	520	0	0	520	0
10.6931	0	520	0	520	0	520	0	520	0	520	0	520	0	520	0	520	0	0	520	0
10.7041	0	520	0	520	0	520	0	520	0	520	0	520	0	520	0	520	0	0	520	0
10.7152	0	520	0	520	0	520	0	520	0	520	0	520	0	520	0	520	0	0	520	0
10.7262	0	520	0	520	0	520	0	520	0	520	0	520	0	520	0	520	0	0	520	0
10.7373	0	520	0	520	0	520	0	520	0	520	0	520	0	520	0	520	0	0	520	0
10.7483	0	520	0	520	0	520	0	520	0	520	0	520	0	520	0	520	0	0	520	0
10.7593	0	520	0	520	0	520	0	520	0	520	0	520	0	520	0	520	0	0	520	0
10.7704	0	520	0	520	0	520	0	520	0	520	0	520	0	520	0	520	0	0	520	0
10.7814	0	520	0	520	0	520	0	520	0	520	0	520	0	520	0	520	0	0	520	0
10.7924	0	520	0	520	0	520	0	520	0	520	0	520	0	520	0	520	0	0	520	0
10.8035	0	520	0	520	0	520	0	520	0	520	0	520	0	520	0	520	0	0	520	0
10.8145	0	520	0	520	0	520	0	520	0	520	0	520	0	520	0	520	0	0	520	0
10.8255	0	520	0	520	0	520	0	520	0	520	0	520	0	520	0	520	0	0	520	0
10.8366	0	520	0	520	0	520	0	520	0	520	0	520	0	520	0	520	0	0	520	0
10.8476	0	520	0	520	0	520	0	520	0	520	0	520	0	520	0	520	0	0	520	0
10.8586	0	520	0	520	0	520	0	520	0	520	0	520	0	520	0	520	0	0	520	0
10.8697	0	520	0	520	0	520	0	520	0	520	0	520	0	520	0	520	0	0	520	0
10.8807	0	520	0	520	0	520	0	520	0	520	0	520	0	520	0	520	0	0	520	0
10.8917	0	520	0	520	0	520	0	520	0	520	0	520	0	520	0	520	0	0	520	0
10.9028	0	520	0	520	0	520	0	520	0	520	0	520	0	520	0	520	0	0	520	0
10.9138	0	520	0	520	0	520	0	520	0	520	0	520	0	520	0	520	0	0	520	0
10.9249	0	520	0	520	0	520	0	520	0	520	0	520	0	520	0	520	0	0	520	0
10.9359	0	520	0	520	0	520	0	520	0	520	0	520	0	520	0	520	0	0	520	0
10.9469	0	520	0	520	0	520	0	520	0	520	0	520	0	520	0	520	0	0	520	0
10.958	0	520	0	520	0	520	0	520	0	520	0	520	0	520	0	520	0	0	520	0
10.969	0	520	0	520	0	520	0	520	0	520	0	520	0	520	0	520	0	0	520	0
10.98	0	520	0	520	0	520	0	520	0	520	0	520	0	520	0	520	0	0	520	0
10.9911	0	520	0	520	0	520	0	520	0	520	0	520	0	520	0	520	0	0	520	0
11.0021	0	520	0	520	0	520	0	520	0	520	0	520	0	520	0	520	0	0	520	0
11.0131	0	520	0	520	0	520	0	520	0	520	0	520	0	520	0	520	0	0	520	0
11.0242	0	520	0	520	0	520	0	520	0	520	0	520	0	520	0	520	0	0	520	0
11.0352	0	520	0	520	0	520	0	520	0	520	0	520	0	520	0	520	0	0	520	0
11.0462	0	520	0	520	0	520	0	520	0	520	0	520	0	520	0	520	0	0	520	0
11.0573	0	520	0	520	0	520	0	520	0	520	0	520	0	520	0	520	0	0	520	0
11.0683	0	520	0	520	0	520	0	520	0	520	0	520	0	520	0	520	0	0	520	0
11.0793	0	520	0	520	0	520	0	520	0	520	0	520	0	520	0	520	0	0	520	0
11.0904	0	520	0	520	0	520	0	520	0	520	0	520	0	520	0	520	0	0	520	0
11.1014	0	520	0	520	0	520	0	520	0	520	0	520	0	520	0	520	0	0	520	0
11.1124	0	520	0	520	0	520	0	520	0	520	0	520	0	520	0	520	0	0	520	0
11.1235	0	520	0	520	0	520	0	520	0	520	0	520	0	520	0	520	0	0	520	0
11.1345	0	520	0	520	0	520	0	520	0	520	0	520	0	520	0	520	0	0	520	0
11.1456	0	520	0	520	0	520	0	520	0	520	0	520	0	520	0	520	0	0	520	0
11.1566	0	520	0	520	0	520	0	520	0	520	0	520	0	520	0	520	0	0	520	0
11.1676	0	520	0	520	0	520	0	520	0	520	0	520	0	520	0	520	0	0	520	0
11.1787	0	520	0	520	0	520	0	520	0	520	0	520	0	520	0	520	0	0	520	0
11.1897	0	520	0	520	0	520	0	520	0	520	0	520	0	520	0	520	0	0	520	0
11.2007	0	520	0	520	0	520	0	520	0	520	0	520	0	520	0	520	0	0	520	0
11.2118	0	520	0	520	0	520	0	520	0	520	0	520	0	520	0	520	0	0	520	0
11.2228	0	520	0	520	0	520	0	520	0	520	0	520	0	520	0	520	0	0	520	0
11.2338	0	520	0	520	0	520	0	520	0	520	0	520	0	520	0	520	0	0	520	0
11.2449	0	520	0	520	0	520	0	520	0	520	0	520	0	520	0	520	0	0	520	0
11.2559	0	520	0	520	0	520	0	520	0	520	0	520	0	520	0	520	0	0	520	0
11.2669	0	520	0	520	0	520	0	520	0	520	0	520	0	520	0	520	0	0	520	0
11.278	0	520	0	520	0	520	0	520	0	520	0	520	0	520	0	520	0	0	520	0
11.289	0	520	0	520	0	520	0	520	0	520	0	520	0	520	0	520	0	0	520	0
11.3	0	520	0	520	0	520	0	520	0	520	0	520	0	520	0	520	0	0	520	0
11.3111	0	520	0	520	0	520	0	520	0	520	0	520	0	520	0	520	0	0	520	0
11.3221	0	520	0	520	0	520	0	520	0	520	0	520	0	520	0	520	0	0	520	0
11.3332	0	520	0	520	0	520	0	520	0	520	0	520	0	520	0	520	0	0	520	0
11.3442	0	520	0	520	0	520	0	520	0	520	0	520	0	520	0	520	0	0	520	0
11.3552	0	520	0	520	0	520	0	520	0	520	0	520	0	520	0	520	0	0	520	0
11.3663	0	520	0	520	0	520	0	520	0	520	0	520	0	520	0	520	0	0	520	0
11.3773	0	520	0	520	0	520	0	520	0	520	0	520	0	520	0	520	0	0	520	0
11.3883	0	520	0	520	0	520	0	520	0	520	0	520	0	520	0	520	0	0	520	0
11.3994	0	520	0	520	0	520	0	520	0	520	0	520	0	520	0	520	0	0	520	0
11.4104	0	520	0	520	0	520	0	520	0	520	0	520	0	520	0	520	0	0	520	0
11.4214	0	520	0	520	0	520	0	520	0	520	0	520	0	520	0	520	0	0	520	0
11.4325	0	520	0	520	0	520	0	520	0	520	0	520	0	520	0	520	0	0	520	0
11.4435	0	520	0	520	0	520	0	520	0	520	0	520	0	520	0	520	0	0	520	0
11.4545	0	520	0	520	0	520	0	520	0	520	0	520	0	520	0	520	0	0	520	0
11.4656	0	520	0	520	0	520	0	520	0	520	0	520	0	520	0	520	0	0	520	0
11.4766	0	520	0	520	0	520	0	520	0	520	0	520	0	520	0	520	0	0	520	0
11.4876	0	520	0	520	0	520	0	520	0	520	0	520	0	520	0	520	0	0	520	0
11.4987	0	520	0	520	0	520	0	520	0	520	0	520	0	520	0	520	0	0	520	0
11.5097	0	520	0	520	0	520	0	520	0	520	0	520	0	520	0	520	0	0	520	0
11.5208	0	520	0	520	0	520	0	520	0	520	0	520	0	520	0	520	0	0	520	0
11.5318	0	520	0	520	0	520	0	520	0	520	0	520	0	520	0	520	0	0	520	0
11.5428	0	520	0	520	0	520	0	520	0	520	0	520	0	520	0	520	0	0	520	0
11.5539	0	520	0	520	0	520	0	520	0	520	0	520	0	520	0	520	0	0	520	0
11.5649	0	520	0	520	0	520	0	520	0	520	0	520	0	520	0	520	0	0	520	0
11.5759	0	520	0	520	0	520	0	520	0	520	0	520	0	520	0	520	0	0	520	0
11.587	0	520	0	520	0	520	0	520	0	520	0	520	0	520	0	520	0	0	520	0
11.598	0	520	0	520	0	520	0	520	0	520	0	520	0	520	0	520	0	0	520	0
11.609	0	520	0	520	0	520	0	520	0	520	0	520	0	520	0	520	0	0	520	0
11.6201	0	520	0	520	0	520	0	520	0	520	0	520	0	520	0	520	0	0	520	0
11.6311	0	520	0	520	0	520	0	520	0	520	0	520	0	520	0	520	0	0	520	0
11.6421	0	520	0	520	0	520	0	520	0	520	0	520	0	520	0	520	0	0	520	0
11.6532	0	520	0	520	0	520	0	520	0	520	0	520	0	520	0	520	0	0	520	0
11.6642	0	520	0	520	0	520	0	520	0	520	0	520	0	520	0	520	0	0	520	0
11.6752	0	520	0	520	0	520	0	520	0	520	0	520	0	520	0	520	0	0	520	0
11.6863	0	520	0	520	0	520	0	520	0	520	0	520	0	520	0	520	0	0	520	0
11.6973	0	520	0	520	0	520	0	520	0	520	0	520	0	520	0	520	0	0	520	0
11.7083	0	520	0	520	0	520	0	520	0	520	0	520	0	520	0	520	0	0	520	0
11.7194	0	520	0	520	0	520	0	520	0	520	0	520	0	520	0	520	0	0	520	0
11.7304	0	520	0	520	0	520	0	520	0	520	0	520	0	520	0	520	0	0	520	0
11.7415	0	520	0	520	0	520	0	520	0	520	0	520	0	520	0	520	0	0	520	0
11.7525	0	520	0	520	0	520	0	520	0	520	0	520	0	520	0	520	0	0	520	0
11.7635	0	520	0	520	0	520	0	520	0	520	0	520	0	520	0	520	0	0	520	0
11.7746	0	520	0	520	0	520	0	520	0	520	0	520	0	520	0	520	0	0	520	0
11.7856	0	520	0	520	0	520	0	520	0	520	0	520	0	520	0	520	0	0	520	0
11.7966	0	520	0	520	0	520	0	520	0	520	0	520	0	520	0	520	0	0	520	0
11.8077	0	520	0	520	0	520	0	520	0	520	0	520	0	520	0	520	0	0	520	0
11.8187	0	520	0	520	0	520	0	520	0	520	0	520	0	520	0	520	0	0	520	0
11.8297	0	520	0	520	0	520	0	520	0	520	0	520	0	520	0	520	0	0	520	0
11.8408	0	520	0	520	0	520	0	520	0	520	0	520	0	520	0	520	0	0	520	0
11.8518	0	520	0	520	0	520	0	520	0	520	0	520	0	520	0	520	0	0	520	0
11.8628	0	520	0	520	0	520	0	520	0	520	0	520	0	520	0	520	0	0	520	0
11.8739	0	520	0	520	0	520	0	520	0	520	0	520	0	520	0	520	0	0	520	0
11.8849	0	520	0	520	0	520	0	520	0	520	0	520	0	520	0	520	0	0	520	0
11.8959	0	520	0	520	0	520	0	520	0	520	0	520	0	520	0	520	0	0	520	0
11.907	0	520	0	520	0	520	0	520	0	520	0	520	0	520	0	520	0	0	520	0
11.918	0	520	0	520	0	520	0	520	0	520	0	520	0	520	0	520	0	0	520	0
11.9291	0	520	0	520	0	520	0	520	0	520	0	520	0	520	0	520	0	0	520	0
11.9401	0	520	0	520	0	520	0	520	0	520	0	520	0	520	0	520	0	0	520	0
11.9511	0	520	0	520	0	520	0	520	0	520	0	520	0	520	0	520	0	0	520	0
11.9622	0	520	0	520	0	520	0	520	0	520	0	520	0	520	0	520	0	0	520	0
11.9732	0	520	0	520	0	520	0	520	0	520	0	520	0	520	0	520	0	0	520	0
11.9842	0	520	0	520	0	520	0	520	0	520	0	520	0	520	0	520	0	0	520	0
11.9953	0	520	0	520	0	520	0	520	0	520	0	520	0	520	0	520	0	0	520	0
12.0063	0	520	0	520	0	520	0	520	0	520	0	520	0	520	0	520	0	0	520	0
12.0173	0	520	0	520	0	520	0	520	0	520	0	520	0	520	0	520	0	0	520	0
12.0284	0	520	0	520	0	520	0	520	0	520	0	520	0	520	0	520	0	0	520	0
12.0394	0	520	0	520	0	520	0	520	0	520	0	520	0	520	0	520	0	0	520	0
12.0504	0	520	0	520	0	520	0	520	0	520	0	520	0	520	0	520	0	0	520	0
12.0615	0	520	0	520	0	520	0	520	0	520	0	520	0	520	0	520	0	0	520	0
12.0725	0	520	0	520	0	520	0	520	0	520	0	520	0	520	0	520	0	0	520	0
12.0835	0	520	0	520	0	520	0	520	0	520	0	520	0	520	0	520	0	0	520	0
12.0946	0	520	0	520	0	520	0	520	0	520	0	520	0	520	0	520	0	0	520	0
12.1056	0	520	0	520	0	520	0	520	0	520	0	520	0	520	0	520	0	0	520	0
12.1167	0	520	0	520	0	520	0	520	0	520	0	520	0	520	0	520	0	0	520	0
12.1277	0	520	0	520	0	520	0	520	0	520	0	520	0	520	0	520	0	0	520	0
12.1387	0	520	0	520	0	520	0	520	0	520	0	520	0	520	0	520	0	0	520	0
12.1498	0	520	0	520	0	520	0	520	0	520	0	520	0	520	0	520	0	0	520	0
12.1608	0	520	0	520	0	520	0	520	0	520	0	520	0	520	0	520	0	0	520	0
12.1718	0	520	0	520	0	520	0	520	0	520	0	520	0	520	0	520	0	0	520	0
12.1829	0	520	0	520	0	520	0	520	0	520	0	520	0	520	0	520	0	0	520	0
12.1939	0	520	0	520	0	520	0	520	0	520	0	520	0	520	0	520	0	0	520	0
12.2049	0	520	0	520	0	520	0	520	0	520	0	520	0	520	0	520	0	0	520	0
12.216	0	520	0	520	0	520	0	520	0	520	0	520	0	520	0	520	0	0	520	0
12.227	0	520	0	520	0	520	0	520	0	520	0	520	0	520	0	520	0	0	520	0
12.238	0	520	0	520	0	520	0	520	0	520	0	520	0	520	0	520	0	0	520	0
12.2491	0	520	0	520	0	520	0	520	0	520	0	520	0	520	0	520	0	0	520	0
12.2601	0	520	0	520	0	520	0	520	0	520	0	520	0	520	0	520	0	0	520	0
12.2711	0	520	0	520	0	520	0	520	0	520	0	520	0	520	0	520	0	0	520	0
12.2822	0	520	0	520	0	520	0	520	0	520	0	520	0	520	0	520	0	0	520	0
12.2932	0	520	0	520	0	520	0	520	0	520	0	520	0	520	0	520	0	0	520	0
12.3043	0	520	0	520	0	520	0	520	0	520	0	520	0	520	0	520	0	0	520	0
12.3153	0	520	0	520	0	520	0	520	0	520	0	520	0	520	0	520	0	0	520	0
12.3263	0	520	0	520	0	520	0	520	0	520	0	520	0	520	0	520	0	0	520	0
12.3374	0	520	0	520	0	520	0	520	0	520	0	520	0	520	0	520	0	0	520	0
12.3484	0	520	0	520	0	520	0	520	0	520	0	520	0	520	0	520	0	0	520	0
12.3594	0	520	0	520	0	520	0	520	0	520	0	520	0	520	0	520	0	0	520	0
12.3705	0	520	0	520	0	520	0	520	0	520	0	520	0	520	0	520	0	0	520	0
12.3815	0	520	0	520	0	520	0	520	0	520	0	520	0	520	0	520	0	0	520	0
12.3925	0	520	0	520	0	520	0	520	0	520	0	520	0	520	0	520	0	0	520	0
12.4036	0	520	0	520	0	520	0	520	0	520	0	520	0	520	0	520	0	0	520	0
12.4146	0	520	0	520	0	520	0	520	0	520	0	520	0	520	0	520	0	0	520	0
12.4256	0	520	0	520	0	520	0	520	0	520	0	520	0	520	0	520	0	0	520	0
12.4367	0	520	0	520	0	520	0	520	0	520	0	520	0	520	0	520	0	0	520	0
12.4477	0	520	0	520	0	520	0	520	0	520	0	520	0	520	0	520	0	0	520	0
12.4587	0	520	0	520	0	520	0	520	0	520	0	520	0	520	0	520	0	0	520	0
12.4698	0	520	0	520	0	520	0	520	0	520	0	520	0	520	0	520	0	0	520	0
12.4808	0	520	0	520	0	520	0	520	0	520	0	520	0	520	0	520	0	0	520	0
12.4918	0	520	0	520	0	520	0	520	0	520	0	520	0	520	0	520	0	0	520	0
12.5029	0	520	0	520	0	520	0	520	0	520	0	520	0	520	0	520	0	0	520	0
12.5139	0	520	0	520	0	520	0	520	0	520	0	520	0	520	0	520	0	0	520	0
12.525	0	520	0	520	0	520	0	520	0	520	0	520	0	520	0	520	0	0	520	0
12.536	0	520	0	520	0	520	0	520	0	520	0	520	0	520	0	520	0	0	520	0
12.547	0	520	0	520	0	520	0	520	0	520	0	520	0	520	0	520	0	0	520	0
12.5581	0	520	0	520	0	520	0	520	0	520	0	520	0	520	0	520	0	0	520	0
12.5691	0	520	0	520	0	520	0	520	0	520	0	520	0	520	0	520	0	0	520	0
12.5801	0	520	0	520	0	520	0	520	0	520	0	520	0	520	0	520	0	0	520	0
12.5912	0	520	0	520	0	520	0	520	0	520	0	520	0	520	0	520	0	0	520	0
12.6022	0	520	0	520	0	520	0	520	0	520	0	520	0	520	0	520	0	0	520	0
12.6132	0	520	0	520	0	520	0	520	0	520	0	520	0	520	0	520	0	0	520	0
12.6243	0	520	0	520	0	520	0	520	0	520	0	520	0	520	0	520	0	0	520	0
12.6353	0	520	0	520	0	520	0	520	0	520	0	520	0	520	0	520	0	0	520	0
12.6463	0	520	0	520	0	520	0	520	0	520	0	520	0	520	0	520	0	0	520	0
12.6574	0	520	0	520	0	520	0	520	0	520	0	520	0	520	0	520	0	0	520	0
12.6684	0	520	0	520	0	520	0	520	0	520	0	520	0	520	0	520	0	0	520	0
12.6794	0	520	0	520	0	520	0	520	0	520	0	520	0	520	0	520	0	0	520	0
12.6905	0	520	0	520	0	520	0	520	0	520	0	520	0	520	0	520	0	0	520	0
12.7015	0	520	0	520	0	520	0	520	0	520	0	520	0	520	0	520	0	0	520	0
12.7126	0	520	0	520	0	520	0	520	0	520	0	520	0	520	0	520	0	0	520	0
12.7236	0	520	0	520	0	520	0	520	0	520	0	520	0	520	0	520	0	0	520	0
12.7346	0	520	0	520	0	520	0	520	0	520	0	520	0	520	0	520	0	0	520	0
12.7457	0	520	0	520	0	520	0	520	0	520	0	520	0	520	0	520	0	0	520	0
12.7567	0	520	0	520	0	520	0	520	0	520	0	520	0	520	0	520	0	0	520	0
12.7677	0	520	0	520	0	520	0	520	0	520	0	520	0	520	0	520	0	0	520	0
12.7788	0	520	0	520	0	520	0	520	0	520	0	520	0	520	0	520	0	0	520	0
12.7898	0	520	0	520	0	520	0	520	0	520	0	520	0	520	0	520	0	0	520	0
12.8008	0	520	0	520	0	520	0	520	0	520	0	520	0	520	0	520	0	0	520	0
12.8119	0	520	0	520	0	520	0	520	0	520	0	520	0	520	0	520	0	0	520	0
12.8229	0	520	0	520	0	520	0	520	0	520	0	520	0	520	0	520	0	0	520	0
12.8339	0	520	0	520	0	520	0	520	0	520	0	520	0	520	0	520	0	0	520	0
12.845	0	520	0	520	0	520	0	520	0	520	0	520	0	520	0	520	0	0	520	0
12.856	0	520	0	520	0	520	0	520	0	520	0	520	0	520	0	520	0	0	520	0
12.867	0	520	0	520	0	520	0	520	0	520	0	520	0	520	0	520	0	0	520	0
12.8781	0	520	0	520	0	520	0	520	0	520	0	520	0	520	0	520	0	0	520	0
12.8891	0	520	0	520	0	520	0	520	0	520	0	520	0	520	0	520	0	0	520	0
12.9002	0	520	0	520	0	520	0	520	0	520	0	520	0	520	0	520	0	0	520	0
12.9112	0	520	0	520	0	520	0	520	0	520	0	520	0	520	0	520	0	0	520	0
12.9222	0	520	0	520	0	520	0	520	0	520	0	520	0	520	0	520	0	0	520	0
12.9333	0	520	0	520	0	520	0	520	0	520	0	520	0	520	0	520	0	0	520	0
12.9443	0	520	0	520	0	520	0	520	0	520	0	520	0	520	0	520	0	0	520	0
12.9553	0	520	0	520	0	520	0	520	0	520	0	520	0	520	0	520	0	0	520	0
12.9664	0	520	0	520	0	520	0	520	0	520	0	520	0	520	0	520	0	0	520	0
12.9774	0	520	0	520	0	520	0	520	0	520	0	520	0	520	0	520	0	0	520	0
12.9884	0	520	0	520	0	520	0	520	0	520	0	520	0	520	0	520	0	0	520	0
12.9995	0	520	0	520	0	520	0	520	0	520	0	520	0	520	0	520	0	0	520	0
13.0105	0	520	0	520	0	520	0	520	0	520	0	520	0	520	0	520	0	0	520	0
13.0215	0	520	0	520	0	520	0	520	0	520	0	520	0	520	0	520	0	0	520	0
13.0326	0	520	0	520	0	520	0	520	0	520	0	520	0	520	0	520	0	0	520	0
13.0436	0	520	0	520	0	520	0	520	0	520	0	520	0	520	0	520	0	0	520	0
13.0546	0	520	0	520	0	520	0	520	0	520	0	520	0	520	0	520	0	0	520	0
13.0657	0	520	0	520	0	520	0	520	0	520	0	520	0	520	0	520	0	0	520	0
13.0767	0	520	0	520	0	520	0	520	0	520	0	520	0	520	0	520	0	0	520	0
13.0878	0	520	0	520	0	520	0	520	0	520	0	520	0	520	0	520	0	0	520	0
13.0988	0	520	0	520	0	520	0	520	0	520	0	520	0	520	0	520	0	0	520	0
13.1098	0	520	0	520	0	520	0	520	0	520	0	520	0	520	0	520	0	0	520	0
13.1209	0	520	0	520	0	520	0	520	0	520	0	520	0	520	0	520	0	0	520	0
13.1319	0	520	0	520	0	520	0	520	0	520	0	520	0	520	0	520	0	0	520	0
13.1429	0	520	0	520	0	520	0	520	0	520	0	520	0	520	0	520	0	0	520	0
13.154	0	520	0	520	0	520	0	520	0	520	0	520	0	520	0	520	0	0	520	0
13.165	0	520	0	520	0	520	0	520	0	520	0	520	0	520	0	520	0	0	520	0
13.176	0	520	0	520	0	520	0	520	0	520	0	520	0	520	0	520	0	0	520	0
13.1871	0	520	0	520	0	520	0	520	0	520	0	520	0	520	0	520	0	0	520	0
13.1981	0	520	0	520	0	520	0	520	0	520	0	520	0	520	0	520	0	0	520	0
13.2091	0	520	0	520	0	520	0	520	0	520	0	520	0	520	0	520	0	0	520	0
13.2202	0	520	0	520	0	520	0	520	0	520	0	520	0	520	0	520	0	0	520	0
13.2312	0	520	0	520	0	520	0	520	0	520	0	520	0	520	0	520	0	0	520	0
13.2422	0	520	0	520	0	520	0	520	0	520	0	520	0	520	0	520	0	0	520	0
13.2533	0	520	0	520	0	520	0	520	0	520	0	520	0	520	0	520	0	0	520	0
13.2643	0	520	0	520	0	520	0	520	0	520	0	520	0	520	0	520	0	0	520	0
13.2753	0	520	0	520	0	520	0	520	0	520	0	520	0	520	0	520	0	0	520	0
13.2864	0	520	0	520	0	520	0	520	0	520	0	520	0	520	0	520	0	0	520	0
13.2974	0	520	0	520	0	520	0	520	0	520	0	520	0	520	0	520	0	0	520	0
13.3085	0	520	0	520	0	520	0	520	0	520	0	520	0	520	0	520	0	0	520	0
13.3195	0	520	0	520	0	520	0	520	0	520	0	520	0	520	0	520	0	0	520	0
13.3305	0	520	0	520	0	520	0	520	0	520	0	520	0	520	0	520	0	0	520	0
13.3416	0	520	0	520	0	520	0	520	0	520	0	520	0	520	0	520	0	0	520	0
13.3526	0	520	0	520	0	520	0	520	0	520	0	520	0	520	0	520	0	0	520	0
13.3636	0	520	0	520	0	520	0	520	0	520	0	520	0	520	0	520	0	0	520	0
13.3747	0	520	0	520	0	520	0	520	0	520	0	520	0	520	0	520	0	0	520	0
13.3857	0	520	0	520	0	520	0	520	0	520	0	520	0	520	0	520	0	0	520	0
13.3967	0	520	0	520	0	520	0	520	0	520	0	520	0	520	0	520	0	0	520	0
13.4078	0	520	0	520	0	520	0	520	0	520	0	520	0	520	0	520	0	0	520	0
13.4188	0	520	0	520	0	520	0	520	0	520	0	520	0	520	0	520	0	0	520	0
13.4298	0	520	0	520	0	520	0	520	0	520	0	520	0	520	0	520	0	0	520	0
13.4409	0	520	0	520	0	520	0	520	0	520	0	520	0	520	0	520	0	0	520	0
13.4519	0	520	0	520	0	520	0	520	0	520	0	520	0	520	0	520	0	0	520	0
13.4629	0	520	0	520	0	520	0	520	0	520	0	520	0	520	0	520	0	0	520	0
13.474	0	520	0	520	0	520	0	520	0	520	0	520	0	520	0	520	0	0	520	0
13.485	0	520	0	520	0	520	0	520	0	520	0	520	0	520	0	520	0	0	520	0
13.4961	0	520	0	520	0	520	0	520	0	520	0	520	0	520	0	520	0	0	520	0
13.5071	0	520	0	520	0	520	0	520	0	520	0	520	0	520	0	520	0	0	520	0
13.5181	0	520	0	520	0	520	0	520	0	520	0	520	0	520	0	520	0	0	520	0
13.5292	0	520	0	520	0	520	0	520	0	520	0	520	0	520	0	520	0	0	520	0
13.5402	0	520	0	520	0	520	0	520	0	520	0	520	0	520	0	520	0	0	520	0
13.5512	0	520	0	520	0	520	0	520	0	520	0	520	0	520	0	520	0	0	520	0
13.5623	0	520	0	520	0	520	0	520	0	520	0	520	0	520	0	520	0	0	520	0
13.5733	0	520	0	520	0	520	0	520	0	520	0	520	0	520	0	520	0	0	520	0
13.5843	0	520	0	520	0	520	0	520	0	520	0	520	0	520	0	520	0	0	520	0
13.5954	0	520	0	520	0	520	0	520	0	520	0	520	0	520	0	520	0	0	520	0
13.6064	0	520	0	520	0	520	0	520	0	520	0	520	0	520	0	520	0	0	520	0
13.6174	0	520	0	520	0	520	0	520	0	520	0	520	0	520	0	520	0	0	520	0
13.6285	0	520	0	520	0	520	0	520	0	520	0	520	0	520	0	520	0	0	520	0
13.6395	0	520	0	520	0	520	0	520	0	520	0	520	0	520	0	520	0	0	520	0
13.6505	0	520	0	520	0	520	0	520	0	520	0	520	0	520	0	520	0	0	520	0
13.6616	0	520	0	520	0	520	0	520	0	520	0	520	0	520	0	520	0	0	520	0
13.6726	0	520	0	520	0	520	0	520	0	520	0	520	0	520	0	520	0	0	520	0
13.6837	0	520	0	520	0	520	0	520	0	520	0	520	0	520	0	520	0	0	520	0
13.6947	0	520	0	520	0	520	0	520	0	520	0	520	0	520	0	520	0	0	520	0
13.7057	0	520	0	520	0	520	0	520	0	520	0	520	0	520	0	520	0	0	520	0
13.7168	0	520	0	520	0	520	0	520	0	520	0	520	0	520	0	520	0	0	520	0
13.7278	0	520	0	520	0	520	0	520	0	520	0	520	0	520	0	520	0	0	520	0
13.7388	0	520	0	520	0	520	0	520	0	520	0	520	0	520	0	520	0	0	520	0
13.7499	0	520	0	520	0	520	0	520	0	520	0	520	0	520	0	520	0	0	520	0
13.7609	0	520	0	520	0	520	0	520	0	520	0	520	0	520	0	520	0	0	520	0
13.7719	0	520	0	520	0	520	0	520	0	520	0	520	0	520	0	520	0	0	520	0
13.783	0	520	0	520	0	520	0	520	0	520	0	520	0	520	0	520	0	0	520	0
13.794	0	520	0	520	0	520	0	520	0	520	0	520	0	520	0	520	0	0	520	0
13.805	0	520	0	520	0	520	0	520	0	520	0	520	0	520	0	520	0	0	520	0
13.8161	0	520	0	520	0	520	0	520	0	520	0	520	0	520	0	520	0	0	520	0
13.8271	0	520	0	520	0	520	0	520	0	520	0	520	0	520	0	520	0	0	520	0
13.8381	0	520	0	520	0	520	0	520	0	520	0	520	0	520	0	520	0	0	520	0
13.8492	0	520	0	520	0	520	0	520	0	520	0	520	0	520	0	520	0	0	520	0
13.8602	0	520	0	520	0	520	0	520	0	520	0	520	0	520	0	520	0	0	520	0
13.8712	0	520	0	520	0	520	0	520	0	520	0	520	0	520	0	520	0	0	520	0
13.8823	0	520	0	520	0	520	0	520	0	520	0	520	0	520	0	520	0	0	520	0
13.8933	0	520	0	520	0	520	0	520	0	520	0	520	0	520	0	520	0	0	520	0
13.9044	0	520	0	520	0	520	0	520	0	520	0	520	0	520	0	520	0	0	520	0
13.9154	0	520	0	520	0	520	0	520	0	520	0	520	0	520	0	520	0	0	520	0
13.9264	0	520	0	520	0	520	0	520	0	520	0	520	0	520	0	520	0	0	520	0
13.9375	0	520	0	520	0	520	0	520	0	520	0	520	0	520	0	520	0	0	520	0
13.9485	0	520	0	520	0	520	0	520	0	520	0	520	0	520	0	520	0	0	520	0
13.9595	0	520	0	520	0	520	0	520	0	520	0	520	0	520	0	520	0	0	520	0
13.9706	0	520	0	520	0	520	0	520	0	520	0	520	0	520	0	520	0	0	520	0
13.9816	0	520	0	520	0	520	0	520	0	520	0	520	0	520	0	520	0	0	520	0
13.9926	0	520	0	520	0	520	0	520	0	520	0	520	0	520	0	520	0	0	520	0
14.0037	0	520	0	520	0	520	0	520	0	520	0	520	0	520	0	520	0	0	520	0
14.0147	0	520	0	520	0	520	0	520	0	520	0	520	0	520	0	520	0	0	520	0
14.0257	0	520	0	520	0	520	0	520	0	520	0	520	0	520	0	520	0	0	520	0
14.0368	0	520	0	520	0	520	0	520	0	520	0	520	0	520	0	520	0	0	520	0
14.0478	0	520	0	520	0	520	0	520	0	520	0	520	0	520	0	520	0	0	520	0
14.0588	0	520	0	520	0	520	0	520	0	520	0	520	0	520	0	520	0	0	520	0
14.0699	0	520	0	520	0	520	0	520	0	520	0	520	0	520	0	520	0	0	520	0
14.0809	0	520	0	520	0	520	0	520	0	520	0	520	0	520	0	520	0	0	520	0
14.092	0	520	0	520	0	520	0	520	0	520	0	520	0	520	0	520	0	0	520	0
14.103	0	520	0	520	0	520	0	520	0	520	0	520	0	520	0	520	0	0	520	0
14.114	0	520	0	520	0	520	0	520	0	520	0	520	0	520	0	520	0	0	520	0
14.1251	0	520	0	520	0	520	0	520	0	520	0	520	0	520	0	520	0	0	520	0
14.1361	0	520	0	520	0	520	0	520	0	520	0	520	0	520	0	520	0	0	520	0
14.1471	0	520	0	520	0	520	0	520	0	520	0	520	0	520	0	520	0	0	520	0
14.1582	0	520	0	520	0	520	0	520	0	520	0	520	0	520	0	520	0	0	520	0
14.1692	0	520	0	520	0	520	0	520	0	520	0	520	0	520	0	520	0	0	520	0
14.1802	0	520	0	520	0	520	0	520	0	520	0	520	0	520	0	520	0	0	520	0
14.1913	0	520	0	520	0	520	0	520	0	520	0	520	0	520	0	520	0	0	520	0
14.2023	0	520	0	520	0	520	0	520	0	520	0	520	0	520	0	520	0	0	520	0
14.2133	0	520	0	520	0	520	0	520	0	520	0	520	0	520	0	520	0	0	520	0
14.2244	0	520	0	520	0	520	0	520	0	520	0	520	0	520	0	520	0	0	520	0
14.2354	0	520	0	520	0	520	0	520	0	520	0	520	0	520	0	520	0	0	520	0
14.2464	0	520	0	520	0	520	0	520	0	520	0	520	0	520	0	520	0	0	520	0
14.2575	0	520	0	520	0	520	0	520	0	520	0	520	0	520	0	520	0	0	520	0
14.2685	0	520	0	520	0	520	0	520	0	520	0	520	0	520	0	520	0	0	520	0
14.2796	0	520	0	520	0	520	0	520	0	520	0	520	0	520	0	520	0	0	520	0
14.2906	0	520	0	520	0	520	0	520	0	520	0	520	0	520	0	520	0	0	520	0
14.3016	0	520	0	520	0	520	0	520	0	520	0	520	0	520	0	520	0	0	520	0
14.3127	0	520	0	520	0	520	0	520	0	520	0	520	0	520	0	520	0	0	520	0
14.3237	0	520	0	520	0	520	0	520	0	520	0	520	0	520	0	520	0	0	520	0
14.3347	0	520	0	520	0	520	0	520	0	520	0	520	0	520	0	520	0	0	520	0
14.3458	0	520	0	520	0	520	0	520	0	520	0	520	0	520	0	520	0	0	520	0
14.3568	0	520	0	520	0	520	0	520	0	520	0	520	0	520	0	520	0	0	520	0
14.3678	0	520	0	520	0	520	0	520	0	520	0	520	0	520	0	520	0	0	520	0
14.3789	0	520	0	520	0	520	0	520	0	520	0	520	0	520	0	520	0	0	520	0
14.3899	0	520	0	520	0	520	0	520	0	520	0	520	0	520	0	520	0	0	520	0
14.4009	0	520	0	520	0	520	0	520	0	520	0	520	0	520	0	520	0	0	520	0
14.412	0	520	0	520	0	520	0	520	0	520	0	520	0	520	0	520	0	0	520	0
14.423	0	520	0	520	0	520	0	520	0	520	0	520	0	520	0	520	0	0	520	0
14.434	0	520	0	520	0	520	0	520	0	520	0	520	0	520	0	520	0	0	520	0
14.4451	0	520	0	520	0	520	0	520	0	520	0	520	0	520	0	520	0	0	520	0
14.4561	0	520	0	520	0	520	0	520	0	520	0	520	0	520	0	520	0	0	520	0
14.4672	0	520	0	520	0	520	0	520	0	520	0	520	0	520	0	520	0	0	520	0
14.4782	0	520	0	520	0	520	0	520	0	520	0	520	0	520	0	520	0	0	520	0
14.4892	0	520	0	520	0	520	0	520	0	520	0	520	0	520	0	520	0	0	520	0
14.5003	0	520	0	520	0	520	0	520	0	520	0	520	0	520	0	520	0	0	520	0
14.5113	0	520	0	520	0	520	0	520	0	520	0	520	0	520	0	520	0	0	520	0
14.5223	0	520	0	520	0	520	0	520	0	520	0	520	0	520	0	520	0	0	520	0
14.5334	0	520	0	520	0	520	0	520	0	520	0	520	0	520	0	520	0	0	520	0
14.5444	0	520	0	520	0	520	0	520	0	520	0	520	0	520	0	520	0	0	520	0
14.5554	0	520	0	520	0	520	0	520	0	520	0	520	0	520	0	520	0	0	520	0
14.5665	0	520	0	520	0	520	0	520	0	520	0	520	0	520	0	520	0	0	520	0
14.5775	0	520	0	520	0	520	0	520	0	520	0	520	0	520	0	520	0	0	520	0
14.5885	0	520	0	520	0	520	0	520	0	520	0	520	0	520	0	520	0	0	520	0
14.5996	0	520	0	520	0	520	0	520	0	520	0	520	0	520	0	520	0	0	520	0
14.6106	0	520	0	520	0	520	0	520	0	520	0	520	0	520	0	520	0	0	520	0
14.6216	0	520	0	520	0	520	0	520	0	520	0	520	0	520	0	520	0	0	520	0
14.6327	0	520	0	520	0	520	0	520	0	520	0	520	0	520	0	520	0	0	520	0
14.6437	0	520	0	520	0	520	0	520	0	520	0	520	0	520	0	520	0	0	520	0
14.6547	0	520	0	520	0	520	0	520	0	520	0	520	0	520	0	520	0	0	520	0
14.6658	0	520	0	520	0	520	0	520	0	520	0	520	0	520	0	520	0	0	520	0
14.6768	0	520	0	520	0	520	0	520	0	520	0	520	0	520	0	520	0	0	520	0
14.6879	0	520	0	520	0	520	0	520	0	520	0	520	0	520	0	520	0	0	520	0
14.6989	0	520	0	520	0	520	0	520	0	520	0	520	0	520	0	520	0	0	520	0
14.7099	0	520	0	520	0	520	0	520	0	520	0	520	0	520	0	520	0	0	520	0
14.721	0	520	0	520	0	520	0	520	0	520	0	520	0	520	0	520	0	0	520	0
14.732	0	520	0	520	0	520	0	520	0	520	0	520	0	520	0	520	0	0	520	0
14.743	0	520	0	520	0	520	0	520	0	520	0	520	0	520	0	520	0	0	520	0
14.7541	0	520	0	520	0	520	0	520	0	520	0	520	0	520	0	520	0	0	520	0
14.7651	0	520	0	520	0	520	0	520	0	520	0	520	0	520	0	520	0	0	520	0
14.7761	0	520	0	520	0	520	0	520	0	520	0	520	0	520	0	520	0	0	520	0
14.7872	0	520	0	520	0	520	0	520	0	520	0	520	0	520	0	520	0	0	520	0
14.7982	0	520	0	520	0	520	0	520	0	520	0	520	0	520	0	520	0	0	520	0
14.8092	0	520	0	520	0	520	0	520	0	520	0	520	0	520	0	520	0	0	520	0
14.8203	0	520	0	520	0	520	0	520	0	520	0	520	0	520	0	520	0	0	520	0
14.8313	0	520	0	520	0	520	0	520	0	520	0	520	0	520	0	520	0	0	520	0
14.8423	0	520	0	520	0	520	0	520	0	520	0	520	0	520	0	520	0	0	520	0
14.8534	0	520	0	520	0	520	0	520	0	520	0	520	0	520	0	520	0	0	520	0
14.8644	0	520	0	520	0	520	0	520	0	520	0	520	0	520	0	520	0	0	520	0
14.8755	0	520	0	520	0	520	0	520	0	520	0	520	0	520	0	520	0	0	520	0
14.8865	0	520	0	520	0	520	0	520	0	520	0	520	0	520	0	520	0	0	520	0
14.8975	0	520	0	520	0	520	0	520	0	520	0	520	0	520	0	520	0	0	520	0
14.9086	0	520	0	520	0	520	0	520	0	520	0	520	0	520	0	520	0	0	520	0
14.9196	0	520	0	520	0	520	0	520	0	520	0	520	0	520	0	520	0	0	520	0
14.9306	0	520	0	520	0	520	0	520	0	520	0	520	0	520	0	520	0	0	520	0
14.9417	0	520	0	520	0	520	0	520	0	520	0	520	0	520	0	520	0	0	520	0
14.9527	0	520	0	520	0	520	0	520	0	520	0	520	0	520	0	520	0	0	520	0
14.9637	0	520	0	520	0	520	0	520	0	520	0	520	0	520	0	520	0	0	520	0
14.9748	0	520	0	520	0	520	0	520	0	520	0	520	0	520	0	520	0	0	520	0
14.9858	0	520	0	520	0	520	0	520	0	520	0	520	0	520	0	520	0	0	520	0
14.9968	0	520	0	520	0	520	0	520	0	520	0	520	0	520	0	520	0	0	520	0
15.0079	0	520	0	520	0	520	0	520	0	520	0	520	0	520	0	520	0	0	520	0
15.0189	0	520	0	520	0	520	0	520	0	520	0	520	0	520	0	520	0	0	520	0
15.0299	0	520	0	520	0	520	0	520	0	520	0	520	0	520	0	520	0	0	520	0
15.041	0	520	0	520	0	520	0	520	0	520	0	520	0	520	0	520	0	0	520	0
15.052	0	520	0	520	0	520	0	520	0	520	0	520	0	520	0	520	0	0	520	0
15.0631	0	520	0	520	0	520	0	520	0	520	0	520	0	520	0	520	0	0	520	0
15.0741	0	520	0	520	0	520	0	520	0	520	0	520	0	520	0	520	0	0	520	0
15.0851	0	520	0	520	0	520	0	520	0	520	0	520	0	520	0	520	0	0	520	0
15.0962	0	520	0	520	0	520	0	520	0	520	0	520	0	520	0	520	0	0	520	0
15.1072	0	520	0	520	0	520	0	520	0	520	0	520	0	520	0	520	0	0	520	0
15.1182	0	520	0	520	0	520	0	520	0	520	0	520	0	520	0	520	0	0	520	0
15.1293	0	520	0	520	0	520	0	520	0	520	0	520	0	520	0	520	0	0	520	0
15.1403	0	520	0	520	0	520	0	520	0	520	0	520	0	520	0	520	0	0	520	0
15.1513	0	520	0	520	0	520	0	520	0	520	0	520	0	520	0	520	0	0	520	0
15.1624	0	520	0	520	0	520	0	520	0	520	0	520	0	520	0	520	0	0	520	0
15.1734	0	520	0	520	0	520	0	520	0	520	0	520	0	520	0	520	0	0	520	0
15.1844	0	520	0	520	0	520	0	520	0	520	0	520	0	520	0	520	0	0	520	0
15.1955	0	520	0	520	0	520	0	520	0	520	0	520	0	520	0	520	0	0	520	0
15.2065	0	520	0	520	0	520	0	520	0	520	0	520	0	520	0	520	0	0	520	0
15.2175	0	520	0	520	0	520	0	520	0	520	0	520	0	520	0	520	0	0	520	0
15.2286	0	520	0	520	0	520	0	520	0	520	0	520	0	520	0	520	0	0	520	0
15.2396	0	520	0	520	0	520	0	520	0	520	0	520	0	520	0	520	0	0	520	0
15.2506	0	520	0	520	0	520	0	520	0	520	0	520	0	520	0	520	0	0	520	0
15.2617	0	520	0	520	0	520	0	520	0	520	0	520	0	520	0	520	0	0	520	0
15.2727	0	520	0	520	0	520	0	520	0	520	0	520	0	520	0	520	0	0	520	0
15.2838	0	520	0	520	0	520	0	520	0	520	0	520	0	520	0	520	0	0	520	0
15.2948	0	520	0	520	0	520	0	520	0	520	0	520	0	520	0	520	0	0	520	0
15.3058	0	520	0	520	0	520	0	520	0	520	0	520	0	520	0	520	0	0	520	0
15.3169	0	520	0	520	0	520	0	520	0	520	0	520	0	520	0	520	0	0	520	0
15.3279	0	520	0	520	0	520	0	520	0	520	0	520	0	520	0	520	0	0	520	0
15.3389	0	520	0	520	0	520	0	520	0	520	0	520	0	520	0	520	0	0	520	0
15.35	0	520	0	520	0	520	0	520	0	520	0	520	0	520	0	520	0	0	520	0
15.361	0	520	0	520	0	520	0	520	0	520	0	520	0	520	0	520	0	0	520	0
15.372	0	520	0	520	0	520	0	520	0	520	0	520	0	520	0	520	0	0	520	0
15.3831	0	520	0	520	0	520	0	520	0	520	0	520	0	520	0	520	0	0	520	0
15.3941	0	520	0	520	0	520	0	520	0	520	0	520	0	520	0	520	0	0	520	0
15.4051	0	520	0	520	0	520	0	520	0	520	0	520	0	520	0	520	0	0	520	0
15.4162	0	520	0	520	0	520	0	520	0	520	0	520	0	520	0	520	0	0	520	0
15.4272	0	520	0	520	0	520	0	520	0	520	0	520	0	520	0	520	0	0	520	0
15.4382	0	520	0	520	0	520	0	520	0	520	0	520	0	520	0	520	0	0	520	0
15.4493	0	520	0	520	0	520	0	520	0	520	0	520	0	520	0	520	0	0	520	0
15.4603	0	520	0	520	0	520	0	520	0	520	0	520	0	520	0	520	0	0	520	0
15.4714	0	520	0	520	0	520	0	520	0	520	0	520	0	520	0	520	0	0	520	0
15.4824	0	520	0	520	0	520	0	520	0	520	0	520	0	520	0	520	0	0	520	0
15.4934	0	520	0	520	0	520	0	520	0	520	0	520	0	520	0	520	0	0	520	0
15.5045	0	520	0	520	0	520	0	520	0	520	0	520	0	520	0	520	0	0	520	0
15.5155	0	520	0	520	0	520	0	520	0	520	0	520	0	520	0	520	0	0	520	0
15.5265	0	520	0	520	0	520	0	520	0	520	0	520	0	520	0	520	0	0	520	0
15.5376	0	520	0	520	0	520	0	520	0	520	0	520	0	520	0	520	0	0	520	0
15.5486	0	520	0	520	0	520	0	520	0	520	0	520	0	520	0	520	0	0	520	0
15.5596	0	520	0	520	0	520	0	520	0	520	0	520	0	520	0	520	0	0	520	0
15.5707	0	520	0	520	0	520	0	520	0	520	0	520	0	520	0	520	0	0	520	0
15.5817	0	520	0	520	0	520	0	520	0	520	0	520	0	520	0	520	0	0	520	0
15.5927	0	520	0	520	0	520	0	520	0	520	0	520	0	520	0	520	0	0	520	0
15.6038	0	520	0	520	0	520	0	520	0	520	0	520	0	520	0	520	0	0	520	0
15.6148	0	520	0	520	0	520	0	520	0	520	0	520	0	520	0	520	0	0	520	0
15.6258	0	520	0	520	0	520	0	520	0	520	0	520	0	520	0	520	0	0	520	0
15.6369	0	520	0	520	0	520	0	520	0	520	0	520	0	520	0	520	0	0	520	0
15.6479	0	520	0	520	0	520	0	520	0	520	0	520	0	520	0	520	0	0	520	0
15.659	0	520	0	520	0	520	0	520	0	520	0	520	0	520	0	520	0	0	520	0
15.67	0	520	0	520	0	520	0	520	0	520	0	520	0	520	0	520	0	0	520	0
15.681	0	520	0	520	0	520	0	520	0	520	0	520	0	520	0	520	0	0	520	0
15.6921	0	520	0	520	0	520	0	520	0	520	0	520	0	520	0	520	0	0	520	0
15.7031	0	520	0	520	0	520	0	520	0	520	0	520	0	520	0	520	0	0	520	0
15.7141	0	520	0	520	0	520	0	520	0	520	0	520	0	520	0	520	0	0	520	0
15.7252	0	520	0	520	0	520	0	520	0	520	0	520	0	520	0	520	0	0	520	0
15.7362	0	520	0	520	0	520	0	520	0	520	0	520	0	520	0	520	0	0	520	0
15.7472	0	520	0	520	0	520	0	520	0	520	0	520	0	520	0	520	0	0	520	0
15.7583	0	520	0	520	0	520	0	520	0	520	0	520	0	520	0	520	0	0	520	0
15.7693	0	520	0	520	0	520	0	520	0	520	0	520	0	520	0	520	0	0	520	0
15.7803	0	520	0	520	0	520	0	520	0	520	0	520	0	520	0	520	0	0	520	0
15.7914	0	520	0	520	0	520	0	520	0	520	0	520	0	520	0	520	0	0	520	0
15.8024	0	520	0	520	0	520	0	520	0	520	0	520	0	520	0	520	0	0	520	0
15.8134	0	520	0	520	0	520	0	520	0	520	0	520	0	520	0	520	0	0	520	0
15.8245	0	520	0	520	0	520	0	520	0	520	0	520	0	520	0	520	0	0	520	0
15.8355	0	520	0	520	0	520	0	520	0	520	0	520	0	520	0	520	0	0	520	0
15.8466	0	520	0	520	0	520	0	520	0	520	0	520	0	520	0	520	0	0	520	0
15.8576	0	520	0	520	0	520	0	520	0	520	0	520	0	520	0	520	0	0	520	0
15.8686	0	520	0	520	0	520	0	520	0	520	0	520	0	520	0	520	0	0	520	0
15.8797	0	520	0	520	0	520	0	520	0	520	0	520	0	520	0	520	0	0	520	0
15.8907	0	520	0	520	0	520	0	520	0	520	0	520	0	520	0	520	0	0	520	0
15.9017	0	520	0	520	0	520	0	520	0	520	0	520	0	520	0	520	0	0	520	0
15.9128	0	520	0	520	0	520	0	520	0	520	0	520	0	520	0	520	0	0	520	0
15.9238	0	520	0	520	0	520	0	520	0	520	0	520	0	520	0	520	0	0	520	0
15.9348	0	520	0	520	0	520	0	520	0	520	0	520	0	520	0	520	0	0	520	0
15.9459	0	520	0	520	0	520	0	520	0	520	0	520	0	520	0	520	0	0	520	0
15.9569	0	520	0	520	0	520	0	520	0	520	0	520	0	520	0	520	0	0	520	0
15.9679	0	520	0	520	0	520	0	520	0	520	0	520	0	520	0	520	0	0	520	0
15.979	0	520	0	520	0	520	0	520	0	520	0	520	0	520	0	520	0	0	520	0
15.99	0	520	0	520	0	520	0	520	0	520	0	520	0	520	0	520	0	0	520	0
16.001	0	520	0	520	0	520	0	520	0	520	0	520	0	520	0	520	0	0	520	0
16.0121	0	520	0	520	0	520	0	520	0	520	0	520	0	520	0	520	0	0	520	0
16.0231	0	520	0	520	0	520	0	520	0	520	0	520	0	520	0	520	0	0	520	0
16.0341	0	520	0	520	0	520	0	520	0	520	0	520	0	520	0	520	0	0	520	0
16.0452	0	520	0	520	0	520	0	520	0	520	0	520	0	520	0	520	0	0	520	0
16.0562	0	520	0	520	0	520	0	520	0	520	0	520	0	520	0	520	0	0	520	0
16.0673	0	520	0	520	0	520	0	520	0	520	0	520	0	520	0	520	0	0	520	0
16.0783	0	520	0	520	0	520	0	520	0	520	0	520	0	520	0	520	0	0	520	0
16.0893	0	520	0	520	0	520	0	520	0	520	0	520	0	520	0	520	0	0	520	0
16.1004	0	520	0	520	0	520	0	520	0	520	0	520	0	520	0	520	0	0	520	0
16.1114	0	520	0	520	0	520	0	520	0	520	0	520	0	520	0	520	0	0	520	0
16.1224	0	520	0	520	0	520	0	520	0	520	0	520	0	520	0	520	0	0	520	0
16.1335	0	520	0	520	0	520	0	520	0	520	0	520	0	520	0	520	0	0	520	0
16.1445	0	520	0	520	0	520	0	520	0	520	0	520	0	520	0	520	0	0	520	0
16.1555	0	520	0	520	0	520	0	520	0	520	0	520	0	520	0	520	0	0	520	0
16.1666	0	520	0	520	0	520	0	520	0	520	0	520	0	520	0	520	0	0	520	0
16.1776	0	520	0	520	0	520	0	520	0	520	0	520	0	520	0	520	0	0	520	0
16.1886	0	520	0	520	0	520	0	520	0	520	0	520	0	520	0	520	0	0	520	0
16.1997	0	520	0	520	0	520	0	520	0	520	0	520	0	520	0	520	0	0	520	0
16.2107	0	520	0	520	0	520	0	520	0	520	0	520	0	520	0	520	0	0	520	0
16.2217	0	520	0	520	0	520	0	520	0	520	0	520	0	520	0	520	0	0	520	0
16.2328	0	520	0	520	0	520	0	520	0	520	0	520	0	520	0	520	0	0	520	0
16.2438	0	520	0	520	0	520	0	520	0	520	0	520	0	520	0	520	0	0	520	0
16.2549	0	520	0	520	0	520	0	520	0	520	0	520	0	520	0	520	0	0	520	0
16.2659	0	520	0	520	0	520	0	520	0	520	0	520	0	520	0	520	0	0	520	0
16.2769	0	520	0	520	0	520	0	520	0	520	0	520	0	520	0	520	0	0	520	0
16.288	0	520	0	520	0	520	0	520	0	520	0	520	0	520	0	520	0	0	520	0
16.299	0	520	0	520	0	520	0	520	0	520	0	520	0	520	0	520	0	0	520	0
16.31	0	520	0	520	0	520	0	520	0	520	0	520	0	520	0	520	0	0	520	0
16.3211	0	520	0	520	0	520	0	520	0	520	0	520	0	520	0	520	0	0	520	0
16.3321	0	520	0	520	0	520	0	520	0	520	0	520	0	520	0	520	0	0	520	0
16.3431	0	520	0	520	0	520	0	520	0	520	0	520	0	520	0	520	0	0	520	0
16.3542	0	520	0	520	0	520	0	520	0	520	0	520	0	520	0	520	0	0	520	0
16.3652	0	520	0	520	0	520	0	520	0	520	0	520	0	520	0	520	0	0	520	0
16.3762	0	520	0	520	0	520	0	520	0	520	0	520	0	520	0	520	0	0	520	0
16.3873	0	520	0	520	0	520	0	520	0	520	0	520	0	520	0	520	0	0	520	0
16.3983	0	520	0	520	0	520	0	520	0	520	0	520	0	520	0	520	0	0	520	0
16.4093	0	520	0	520	0	520	0	520	0	520	0	520	0	520	0	520	0	0	520	0
16.4204	0	520	0	520	0	520	0	520	0	520	0	520	0	520	0	520	0	0	520	0
16.4314	0	520	0	520	0	520	0	520	0	520	0	520	0	520	0	520	0	0	520	0
16.4425	0	520	0	520	0	520	0	520	0	520	0	520	0	520	0	520	0	0	520	0
16.4535	0	520	0	520	0	520	0	520	0	520	0	520	0	520	0	520	0	0	520	0
16.4645	0	520	0	520	0	520	0	520	0	520	0	520	0	520	0	520	0	0	520	0
16.4756	0	520	0	520	0	520	0	520	0	520	0	520	0	520	0	520	0	0	520	0
16.4866	0	520	0	520	0	520	0	520	0	520	0	520	0	520	0	520	0	0	520	0
16.4976	0	520	0	520	0	520	0	520	0	520	0	520	0	520	0	520	0	0	520	0
16.5087	0	520	0	520	0	520	0	520	0	520	0	520	0	520	0	520	0	0	520	0
16.5197	0	520	0	520	0	520	0	520	0	520	0	520	0	520	0	520	0	0	520	0
16.5307	0	520	0	520	0	520	0	520	0	520	0	520	0	520	0	520	0	0	520	0
16.5418	0	520	0	520	0	520	0	520	0	520	0	520	0	520	0	520	0	0	520	0
16.5528	0	520	0	520	0	520	0	520	0	520	0	520	0	520	0	520	0	0	520	0
16.5638	0	520	0	520	0	520	0	520	0	520	0	520	0	520	0	520	0	0	520	0
16.5749	0	520	0	520	0	520	0	520	0	520	0	520	0	520	0	520	0	0	520	0
16.5859	0	520	0	520	0	520	0	520	0	520	0	520	0	520	0	520	0	0	520	0
16.5969	0	520	0	520	0	520	0	520	0	520	0	520	0	520	0	520	0	0	520	0
16.608	0	520	0	520	0	520	0	520	0	520	0	520	0	520	0	520	0	0	520	0
16.619	0	520	0	520	0	520	0	520	0	520	0	520	0	520	0	520	0	0	520	0
16.6301	0	520	0	520	0	520	0	520	0	520	0	520	0	520	0	520	0	0	520	0
16.6411	0	520	0	520	0	520	0	520	0	520	0	520	0	520	0	520	0	0	520	0
16.6521	0	520	0	520	0	520	0	520	0	520	0	520	0	520	0	520	0	0	520	0
16.6632	0	520	0	520	0	520	0	520	0	520	0	520	0	520	0	520	0	0	520	0
16.6742	0	520	0	520	0	520	0	520	0	520	0	520	0	520	0	520	0	0	520	0
16.6852	0	520	0	520	0	520	0	520	0	520	0	520	0	520	0	520	0	0	520	0
16.6963	0	520	0	520	0	520	0	520	0	520	0	520	0	520	0	520	0	0	520	0
16.7073	0	520	0	520	0	520	0	520	0	520	0	520	0	520	0	520	0	0	520	0
16.7183	0	520	0	520	0	520	0	520	0	520	0	520	0	520	0	520	0	0	520	0
16.7294	0	520	0	520	0	520	0	520	0	520	0	520	0	520	0	520	0	0	520	0
16.7404	0	520	0	520	0	520	0	520	0	520	0	520	0	520	0	520	0	0	520	0
16.7514	0	520	0	520	0	520	0	520	0	520	0	520	0	520	0	520	0	0	520	0
16.7625	0	520	0	520	0	520	0	520	0	520	0	520	0	520	0	520	0	0	520	0
16.7735	0	520	0	520	0	520	0	520	0	520	0	520	0	520	0	520	0	0	520	0
16.7845	0	520	0	520	0	520	0	520	0	520	0	520	0	520	0	520	0	0	520	0
16.7956	0	520	0	520	0	520	0	520	0	520	0	520	0	520	0	520	0	0	520	0
16.8066	0	520	0	520	0	520	0	520	0	520	0	520	0	520	0	520	0	0	520	0
16.8176	0	520	0	520	0	520	0	520	0	520	0	520	0	520	0	520	0	0	520	0
16.8287	0	520	0	520	0	520	0	520	0	520	0	520	0	520	0	520	0	0	520	0
16.8397	0	520	0	520	0	520	0	520	0	520	0	520	0	520	0	520	0	0	520	0
16.8508	0	520	0	520	0	520	0	520	0	520	0	520	0	520	0	520	0	0	520	0
16.8618	0	520	0	520	0	520	0	520	0	520	0	520	0	520	0	520	0	0	520	0
16.8728	0	520	0	520	0	520	0	520	0	520	0	520	0	520	0	520	0	0	520	0
16.8839	0	520	0	520	0	520	0	520	0	520	0	520	0	520	0	520	0	0	520	0
16.8949	0	520	0	520	0	520	0	520	0	520	0	520	0	520	0	520	0	0	520	0
16.9059	0	520	0	520	0	520	0	520	0	520	0	520	0	520	0	520	0	0	520	0
16.917	0	520	0	520	0	520	0	520	0	520	0	520	0	520	0	520	0	0	520	0
16.928	0	520	0	520	0	520	0	520	0	520	0	520	0	520	0	520	0	0	520	0
16.939	0	520	0	520	0	520	0	520	0	520	0	520	0	520	0	520	0	0	520	0
16.9501	0	520	0	520	0	520	0	520	0	520	0	520	0	520	0	520	0	0	520	0
16.9611	0	520	0	520	0	520	0	520	0	520	0	520	0	520	0	520	0	0	520	0
16.9721	0	520	0	520	0	520	0	520	0	520	0	520	0	520	0	520	0	0	520	0
16.9832	0	520	0	520	0	520	0	520	0	520	0	520	0	520	0	520	0	0	520	0
16.9942	0	520	0	520	0	520	0	520	0	520	0	520	0	520	0	520	0	0	520	0
17.0052	0	520	0	520	0	520	0	520	0	520	0	520	0	520	0	520	0	0	520	0
17.0163	0	520	0	520	0	520	0	520	0	520	0	520	0	520	0	520	0	0	520	0
17.0273	0	520	0	520	0	520	0	520	0	520	0	520	0	520	0	520	0	0	520	0
17.0384	0	520	0	520	0	520	0	520	0	520	0	520	0	520	0	520	0	0	520	0
17.0494	0	520	0	520	0	520	0	520	0	520	0	520	0	520	0	520	0	0	520	0
17.0604	0	520	0	520	0	520	0	520	0	520	0	520	0	520	0	520	0	0	520	0
17.0715	0	520	0	520	0	520	0	520	0	520	0	520	0	520	0	520	0	0	520	0
17.0825	0	520	0	520	0	520	0	520	0	520	0	520	0	520	0	520	0	0	520	0
17.0935	0	520	0	520	0	520	0	520	0	520	0	520	0	520	0	520	0	0	520	0
17.1046	0	520	0	520	0	520	0	520	0	520	0	520	0	520	0	520	0	0	520	0
17.1156	0	520	0	520	0	520	0	520	0	520	0	520	0	520	0	520	0	0	520	0
17.1266	0	520	0	520	0	520	0	520	0	520	0	520	0	520	0	520	0	0	520	0
17.1377	0	520	0	520	0	520	0	520	0	520	0	520	0	520	0	520	0	0	520	0
17.1487	0	520	0	520	0	520	0	520	0	520	0	520	0	520	0	520	0	0	520	0
17.1597	0	520	0	520	0	520	0	520	0	520	0	520	0	520	0	520	0	0	520	0
17.1708	0	520	0	520	0	520	0	520	0	520	0	520	0	520	0	520	0	0	520	0
17.1818	0	520	0	520	0	520	0	520	0	520	0	520	0	520	0	520	0	0	520	0
17.1928	0	520	0	520	0	520	0	520	0	520	0	520	0	520	0	520	0	0	520	0
17.2039	0	520	0	520	0	520	0	520	0	520	0	520	0	520	0	520	0	0	520	0
17.2149	0	520	0	520	0	520	0	520	0	520	0	520	0	520	0	520	0	0	520	0
17.226	0	520	0	520	0	520	0	520	0	520	0	520	0	520	0	520	0	0	520	0
17.237	0	520	0	520	0	520	0	520	0	520	0	520	0	520	0	520	0	0	520	0
17.248	0	520	0	520	0	520	0	520	0	520	0	520	0	520	0	520	0	0	520	0
17.2591	0	520	0	520	0	520	0	520	0	520	0	520	0	520	0	520	0	0	520	0
17.2701	0	520	0	520	0	520	0	520	0	520	0	520	0	520	0	520	0	0	520	0
17.2811	0	520	0	520	0	520	0	520	0	520	0	520	0	520	0	520	0	0	520	0
17.2922	0	520	0	520	0	520	0	520	0	520	0	520	0	520	0	520	0	0	520	0
17.3032	0	520	0	520	0	520	0	520	0	520	0	520	0	520	0	520	0	0	520	0
17.3142	0	520	0	520	0	520	0	520	0	520	0	520	0	520	0	520	0	0	520	0
17.3253	0	520	0	520	0	520	0	520	0	520	0	520	0	520	0	520	0	0	520	0
17.3363	0	520	0	520	0	520	0	520	0	520	0	520	0	520	0	520	0	0	520	0
17.3473	0	520	0	520	0	520	0	520	0	520	0	520	0	520	0	520	0	0	520	0
17.3584	0	520	0	520	0	520	0	520	0	520	0	520	0	520	0	520	0	0	520	0
17.3694	0	520	0	520	0	520	0	520	0	520	0	520	0	520	0	520	0	0	520	0
17.3804	0	520	0	520	0	520	0	520	0	520	0	520	0	520	0	520	0	0	520	0
17.3915	0	520	0	520	0	520	0	520	0	520	0	520	0	520	0	520	0	0	520	0
17.4025	0	520	0	520	0	520	0	520	0	520	0	520	0	520	0	520	0	0	520	0
17.4135	0	520	0	520	0	520	0	520	0	520	0	520	0	520	0	520	0	0	520	0
17.4246	0	520	0	520	0	520	0	520	0	520	0	520	0	520	0	520	0	0	520	0
17.4356	0	520	0	520	0	520	0	520	0	520	0	520	0	520	0	520	0	0	520	0
17.4467	0	520	0	520	0	520	0	520	0	520	0	520	0	520	0	520	0	0	520	0
17.4577	0	520	0	520	0	520	0	520	0	520	0	520	0	520	0	520	0	0	520	0
17.4687	0	520	0	520	0	520	0	520	0	520	0	520	0	520	0	520	0	0	520	0
17.4798	0	520	0	520	0	520	0	520	0	520	0	520	0	520	0	520	0	0	520	0
17.4908	0	520	0	520	0	520	0	520	0	520	0	520	0	520	0	520	0	0	520	0
17.5018	0	520	0	520	0	520	0	520	0	520	0	520	0	520	0	520	0	0	520	0
17.5129	0	520	0	520	0	520	0	520	0	520	0	520	0	520	0	520	0	0	520	0
17.5239	0	520	0	520	0	520	0	520	0	520	0	520	0	520	0	520	0	0	520	0
17.5349	0	520	0	520	0	520	0	520	0	520	0	520	0	520	0	520	0	0	520	0
17.546	0	520	0	520	0	520	0	520	0	520	0	520	0	520	0	520	0	0	520	0
17.557	0	520	0	520	0	520	0	520	0	520	0	520	0	520	0	520	0	0	520	0
17.568	0	520	0	520	0	520	0	520	0	520	0	520	0	520	0	520	0	0	520	0
17.5791	0	520	0	520	0	520	0	520	0	520	0	520	0	520	0	520	0	0	520	0
17.5901	0	520	0	520	0	520	0	520	0	520	0	520	0	520	0	520	0	0	520	0
17.6011	0	520	0	520	0	520	0	520	0	520	0	520	0	520	0	520	0	0	520	0
17.6122	0	520	0	520	0	520	0	520	0	520	0	520	0	520	0	520	0	0	520	0
17.6232	0	520	0	520	0	520	0	520	0	520	0	520	0	520	0	520	0	0	520	0
17.6343	0	520	0	520	0	520	0	520	0	520	0	520	0	520	0	520	0	0	520	0
17.6453	0	520	0	520	0	520	0	520	0	520	0	520	0	520	0	520	0	0	520	0
17.6563	0	520	0	520	0	520	0	520	0	520	0	520	0	520	0	520	0	0	520	0
17.6674	0	520	0	520	0	520	0	520	0	520	0	520	0	520	0	520	0	0	520	0
17.6784	0	520	0	520	0	520	0	520	0	520	0	520	0	520	0	520	0	0	520	0
17.6894	0	520	0	520	0	520	0	520	0	520	0	520	0	520	0	520	0	0	520	0
17.7005	0	520	0	520	0	520	0	520	0	520	0	520	0	520	0	520	0	0	520	0
17.7115	0	520	0	520	0	520	0	520	0	520	0	520	0	520	0	520	0	0	520	0
17.7225	0	520	0	520	0	520	0	520	0	520	0	520	0	520	0	520	0	0	520	0
17.7336	0	520	0	520	0	520	0	520	0	520	0	520	0	520	0	520	0	0	520	0
17.7446	0	520	0	520	0	520	0	520	0	520	0	520	0	520	0	520	0	0	520	0
17.7556	0	520	0	520	0	520	0	520	0	520	0	520	0	520	0	520	0	0	520	0
17.7667	0	520	0	520	0	520	0	520	0	520	0	520	0	520	0	520	0	0	520	0
17.7777	0	520	0	520	0	520	0	520	0	520	0	520	0	520	0	520	0	0	520	0
17.7887	0	520	0	520	0	520	0	520	0	520	0	520	0	520	0	520	0	0	520	0
17.7998	0	520	0	520	0	520	0	520	0	520	0	520	0	520	0	520	0	0	520	0
17.8108	0	520	0	520	0	520	0	520	0	520	0	520	0	520	0	520	0	0	520	0
17.8219	0	520	0	520	0	520	0	520	0	520	0	520	0	520	0	520	0	0	520	0
17.8329	0	520	0	520	0	520	0	520	0	520	0	520	0	520	0	520	0	0	520	0
17.8439	0	520	0	520	0	520	0	520	0	520	0	520	0	520	0	520	0	0	520	0
17.855	0	520	0	520	0	520	0	520	0	520	0	520	0	520	0	520	0	0	520	0
17.866	0	520	0	520	0	520	0	520	0	520	0	520	0	520	0	520	0	0	520	0
17.877	0	520	0	520	0	520	0	520	0	520	0	520	0	520	0	520	0	0	520	0
17.8881	0	520	0	520	0	520	0	520	0	520	0	520	0	520	0	520	0	0	520	0
17.8991	0	520	0	520	0	520	0	520	0	520	0	520	0	520	0	520	0	0	520	0
17.9101	0	520	0	520	0	520	0	520	0	520	0	520	0	520	0	520	0	0	520	0
17.9212	0	520	0	520	0	520	0	520	0	520	0	520	0	520	0	520	0	0	520	0
17.9322	0	520	0	520	0	520	0	520	0	520	0	520	0	520	0	520	0	0	520	0
17.9432	0	520	0	520	0	520	0	520	0	520	0	520	0	520	0	520	0	0	520	0
17.9543	0	520	0	520	0	520	0	520	0	520	0	520	0	520	0	520	0	0	520	0
17.9653	0	520	0	520	0	520	0	520	0	520	0	520	0	520	0	520	0	0	520	0
17.9763	0	520	0	520	0	520	0	520	0	520	0	520	0	520	0	520	0	0	520	0
17.9874	0	520	0	520	0	520	0	520	0	520	0	520	0	520	0	520	0	0	520	0
17.9984	0	520	0	520	0	520	0	520	0	520	0	520	0	520	0	520	0	0	520	0
18.0095	0	520	0	520	0	520	0	520	0	520	0	520	0	520	0	520	0	0	520	0
18.0205	0	520	0	520	0	520	0	520	0	520	0	520	0	520	0	520	0	0	520	0
18.0315	0	520	0	520	0	520	0	520	0	520	0	520	0	520	0	520	0	0	520	0
18.0426	0	520	0	520	0	520	0	520	0	520	0	520	0	520	0	520	0	0	520	0
18.0536	0	520	0	520	0	520	0	520	0	520	0	520	0	520	0	520	0	0	520	0
18.0646	0	520	0	520	0	520	0	520	0	520	0	520	0	520	0	520	0	0	520	0
18.0757	0	520	0	520	0	520	0	520	0	520	0	520	0	520	0	520	0	0	520	0
18.0867	0	520	0	520	0	520	0	520	0	520	0	520	0	520	0	520	0	0	520	0
18.0977	0	520	0	520	0	520	0	520	0	520	0	520	0	520	0	520	0	0	520	0
18.1088	0	520	0	520	0	520	0	520	0	520	0	520	0	520	0	520	0	0	520	0
18.1198	0	520	0	520	0	520	0	520	0	520	0	520	0	520	0	520	0	0	520	0
18.1308	0	520	0	520	0	520	0	520	0	520	0	520	0	520	0	520	0	0	520	0
18.1419	0	520	0	520	0	520	0	520	0	520	0	520	0	520	0	520	0	0	520	0
18.1529	0	520	0	520	0	520	0	520	0	520	0	520	0	520	0	520	0	0	520	0
18.1639	0	520	0	520	0	520	0	520	0	520	0	520	0	520	0	520	0	0	520	0
18.175	0	520	0	520	0	520	0	520	0	520	0	520	0	520	0	520	0	0	520	0
18.186	0	520	0	520	0	520	0	520	0	520	0	520	0	520	0	520	0	0	520	0
18.197	0	520	0	520	0	520	0	520	0	520	0	520	0	520	0	520	0	0	520	0
18.2081	0	520	0	520	0	520	0	520	0	520	0	520	0	520	0	520	0	0	520	0
18.2191	0	520	0	520	0	520	0	520	0	520	0	520	0	520	0	520	0	0	520	0
18.2302	0	520	0	520	0	520	0	520	0	520	0	520	0	520	0	520	0	0	520	0
18.2412	0	520	0	520	0	520	0	520	0	520	0	520	0	520	0	520	0	0	520	0
18.2522	0	520	0	520	0	520	0	520	0	520	0	520	0	520	0	520	0	0	520	0
18.2633	0	520	0	520	0	520	0	520	0	520	0	520	0	520	0	520	0	0	520	0
18.2743	0	520	0	520	0	520	0	520	0	520	0	520	0	520	0	520	0	0	520	0
18.2853	0	520	0	520	0	520	0	520	0	520	0	520	0	520	0	520	0	0	520	0
18.2964	0	520	0	520	0	520	0	520	0	520	0	520	0	520	0	520	0	0	520	0
18.3074	0	520	0	520	0	520	0	520	0	520	0	520	0	520	0	520	0	0	520	0
18.3184	0	520	0	520	0	520	0	520	0	520	0	520	0	520	0	520	0	0	520	0
18.3295	0	520	0	520	0	520	0	520	0	520	0	520	0	520	0	520	0	0	520	0
18.3405	0	520	0	520	0	520	0	520	0	520	0	520	0	520	0	520	0	0	520	0
18.3515	0	520	0	520	0	520	0	520	0	520	0	520	0	520	0	520	0	0	520	0
18.3626	0	520	0	520	0	520	0	520	0	520	0	520	0	520	0	520	0	0	520	0
18.3736	0	520	0	520	0	520	0	520	0	520	0	520	0	520	0	520	0	0	520	0
18.3846	0	520	0	520	0	520	0	520	0	520	0	520	0	520	0	520	0	0	520	0
18.3957	0	520	0	520	0	520	0	520	0	520	0	520	0	520	0	520	0	0	520	0
18.4067	0	520	0	520	0	520	0	520	0	520	0	520	0	520	0	520	0	0	520	0
18.4178	0	520	0	520	0	520	0	520	0	520	0	520	0	520	0	520	0	0	520	0
18.4288	0	520	0	520	0	520	0	520	0	520	0	520	0	520	0	520	0	0	520	0
18.4398	0	520	0	520	0	520	0	520	0	520	0	520	0	520	0	520	0	0	520	0
18.4509	0	520	0	520	0	520	0	520	0	520	0	520	0	520	0	520	0	0	520	0
18.4619	0	520	0	520	0	520	0	520	0	520	0	520	0	520	0	520	0	0	520	0
18.4729	0	520	0	520	0	520	0	520	0	520	0	520	0	520	0	520	0	0	520	0
18.484	0	520	0	520	0	520	0	520	0	520	0	520	0	520	0	520	0	0	520	0
18.495	0	520	0	520	0	520	0	520	0	520	0	520	0	520	0	520	0	0	520	0
18.506	0	520	0	520	0	520	0	520	0	520	0	520	0	520	0	520	0	0	520	0
18.5171	0	520	0	520	0	520	0	520	0	520	0	520	0	520	0	520	0	0	520	0
18.5281	0	520	0	520	0	520	0	520	0	520	0	520	0	520	0	520	0	0	520	0
18.5391	0	520	0	520	0	520	0	520	0	520	0	520	0	520	0	520	0	0	520	0
18.5502	0	520	0	520	0	520	0	520	0	520	0	520	0	520	0	520	0	0	520	0
18.5612	0	520	0	520	0	520	0	520	0	520	0	520	0	520	0	520	0	0	520	0
18.5722	0	520	0	520	0	520	0	520	0	520	0	520	0	520	0	520	0	0	520	0
18.5833	0	520	0	520	0	520	0	520	0	520	0	520	0	520	0	520	0	0	520	0
18.5943	0	520	0	520	0	520	0	520	0	520	0	520	0	520	0	520	0	0	520	0
18.6054	0	520	0	520	0	520	0	520	0	520	0	520	0	520	0	520	0	0	520	0
18.6164	0	520	0	520	0	520	0	520	0	520	0	520	0	520	0	520	0	0	520	0
18.6274	0	520	0	520	0	520	0	520	0	520	0	520	0	520	0	520	0	0	520	0
18.6385	0	520	0	520	0	520	0	520	0	520	0	520	0	520	0	520	0	0	520	0
18.6495	0	520	0	520	0	520	0	520	0	520	0	520	0	520	0	520	0	0	520	0
18.6605	0	520	0	520	0	520	0	520	0	520	0	520	0	520	0	520	0	0	520	0
18.6716	0	520	0	520	0	520	0	520	0	520	0	520	0	520	0	520	0	0	520	0
18.6826	0	520	0	520	0	520	0	520	0	520	0	520	0	520	0	520	0	0	520	0
18.6936	0	520	0	520	0	520	0	520	0	520	0	520	0	520	0	520	0	0	520	0
18.7047	0	520	0	520	0	520	0	520	0	520	0	520	0	520	0	520	0	0	520	0
18.7157	0	520	0	520	0	520	0	520	0	520	0	520	0	520	0	520	0	0	520	0
18.7267	0	520	0	520	0	520	0	520	0	520	0	520	0	520	0	520	0	0	520	0
18.7378	0	520	0	520	0	520	0	520	0	520	0	520	0	520	0	520	0	0	520	0
18.7488	0	520	0	520	0	520	0	520	0	520	0	520	0	520	0	520	0	0	520	0
18.7598	0	520	0	520	0	520	0	520	0	520	0	520	0	520	0	520	0	0	520	0
18.7709	0	520	0	520	0	520	0	520	0	520	0	520	0	520	0	520	0	0	520	0
18.7819	0	520	0	520	0	520	0	520	0	520	0	520	0	520	0	520	0	0	520	0
18.7929	0	520	0	520	0	520	0	520	0	520	0	520	0	520	0	520	0	0	520	0
18.804	0	520	0	520	0	520	0	520	0	520	0	520	0	520	0	520	0	0	520	0
18.815	0	520	0	520	0	520	0	520	0	520	0	520	0	520	0	520	0	0	520	0
18.8261	0	520	0	520	0	520	0	520	0	520	0	520	0	520	0	520	0	0	520	0
18.8371	0	520	0	520	0	520	0	520	0	520	0	520	0	520	0	520	0	0	520	0
18.8481	0	520	0	520	0	520	0	520	0	520	0	520	0	520	0	520	0	0	520	0
18.8592	0	520	0	520	0	520	0	520	0	520	0	520	0	520	0	520	0	0	520	0
18.8702	0	520	0	520	0	520	0	520	0	520	0	520	0	520	0	520	0	0	520	0
18.8812	0	520	0	520	0	520	0	520	0	520	0	520	0	520	0	520	0	0	520	0
18.8923	0	520	0	520	0	520	0	520	0	520	0	520	0	520	0	520	0	0	520	0
18.9033	0	520	0	520	0	520	0	520	0	520	0	520	0	520	0	520	0	0	520	0
18.9143	0	520	0	520	0	520	0	520	0	520	0	520	0	520	0	520	0	0	520	0
18.9254	0	520	0	520	0	520	0	520	0	520	0	520	0	520	0	520	0	0	520	0
18.9364	0	520	0	520	0	520	0	520	0	520	0	520	0	520	0	520	0	0	520	0
18.9474	0	520	0	520	0	520	0	520	0	520	0	520	0	520	0	520	0	0	520	0
18.9585	0	520	0	520	0	520	0	520	0	520	0	520	0	520	0	520	0	0	520	0
18.9695	0	520	0	520	0	520	0	520	0	520	0	520	0	520	0	520	0	0	520	0
18.9805	0	520	0	520	0	520	0	520	0	520	0	520	0	520	0	520	0	0	520	0
18.9916	0	520	0	520	0	520	0	520	0	520	0	520	0	520	0	520	0	0	520	0
19.0026	0	520	0	520	0	520	0	520	0	520	0	520	0	520	0	520	0	0	520	0
19.0137	0	520	0	520	0	520	0	520	0	520	0	520	0	520	0	520	0	0	520	0
19.0247	0	520	0	520	0	520	0	520	0	520	0	520	0	520	0	520	0	0	520	0
19.0357	0	520	0	520	0	520	0	520	0	520	0	520	0	520	0	520	0	0	520	0
19.0468	0	520	0	520	0	520	0	520	0	520	0	520	0	520	0	520	0	0	520	0
19.0578	0	520	0	520	0	520	0	520	0	520	0	520	0	520	0	520	0	0	520	0
19.0688	0	520	0	520	0	520	0	520	0	520	0	520	0	520	0	520	0	0	520	0
19.0799	0	520	0	520	0	520	0	520	0	520	0	520	0	520	0	520	0	0	520	0
19.0909	0	520	0	520	0	520	0	520	0	520	0	520	0	520	0	520	0	0	520	0
19.1019	0	520	0	520	0	520	0	520	0	520	0	520	0	520	0	520	0	0	520	0
19.113	0	520	0	520	0	520	0	520	0	520	0	520	0	520	0	520	0	0	520	0
19.124	0	520	0	520	0	520	0	520	0	520	0	520	0	520	0	520	0	0	520	0
19.135	0	520	0	520	0	520	0	520	0	520	0	520	0	520	0	520	0	0	520	0
19.1461	0	520	0	520	0	520	0	520	0	520	0	520	0	520	0	520	0	0	520	0
19.1571	0	520	0	520	0	520	0	520	0	520	0	520	0	520	0	520	0	0	520	0
19.1681	0	520	0	520	0	520	0	520	0	520	0	520	0	520	0	520	0	0	520	0
19.1792	0	520	0	520	0	520	0	520	0	520	0	520	0	520	0	520	0	0	520	0
19.1902	0	520	0	520	0	520	0	520	0	520	0	520	0	520	0	520	0	0	520	0
19.2013	0	520	0	520	0	520	0	520	0	520	0	520	0	520	0	520	0	0	520	0
19.2123	0	520	0	520	0	520	0	520	0	520	0	520	0	520	0	520	0	0	520	0
19.2233	0	520	0	520	0	520	0	520	0	520	0	520	0	520	0	520	0	0	520	0
19.2344	0	520	0	520	0	520	0	520	0	520	0	520	0	520	0	520	0	0	520	0
19.2454	0	520	0	520	0	520	0	520	0	520	0	520	0	520	0	520	0	0	520	0
19.2564	0	520	0	520	0	520	0	520	0	520	0	520	0	520	0	520	0	0	520	0
19.2675	0	520	0	520	0	520	0	520	0	520	0	520	0	520	0	520	0	0	520	0
19.2785	0	520	0	520	0	520	0	520	0	520	0	520	0	520	0	520	0	0	520	0
19.2895	0	520	0	520	0	520	0	520	0	520	0	520	0	520	0	520	0	0	520	0
19.3006	0	520	0	520	0	520	0	520	0	520	0	520	0	520	0	520	0	0	520	0
19.3116	0	520	0	520	0	520	0	520	0	520	0	520	0	520	0	520	0	0	520	0
19.3226	0	520	0	520	0	520	0	520	0	520	0	520	0	520	0	520	0	0	520	0
19.3337	0	520	0	520	0	520	0	520	0	520	0	520	0	520	0	520	0	0	520	0
19.3447	0	520	0	520	0	520	0	520	0	520	0	520	0	520	0	520	0	0	520	0
19.3557	0	520	0	520	0	520	0	520	0	520	0	520	0	520	0	520	0	0	520	0
19.3668	0	520	0	520	0	520	0	520	0	520	0	520	0	520	0	520	0	0	520	0
19.3778	0	520	0	520	0	520	0	520	0	520	0	520	0	520	0	520	0	0	520	0
19.3889	0	520	0	520	0	520	0	520	0	520	0	520	0	520	0	520	0	0	520	0
19.3999	0	520	0	520	0	520	0	520	0	520	0	520	0	520	0	520	0	0	520	0
19.4109	0	520	0	520	0	520	0	520	0	520	0	520	0	520	0	520	0	0	520	0
19.422	0	520	0	520	0	520	0	520	0	520	0	520	0	520	0	520	0	0	520	0
19.433	0	520	0	520	0	520	0	520	0	520	0	520	0	520	0	520	0	0	520	0
19.444	0	520	0	520	0	520	0	520	0	520	0	520	0	520	0	520	0	0	520	0
19.4551	0	520	0	520	0	520	0	520	0	520	0	520	0	520	0	520	0	0	520	0
19.4661	0	520	0	520	0	520	0	520	0	520	0	520	0	520	0	520	0	0	520	0
19.4771	0	520	0	520	0	520	0	520	0	520	0	520	0	520	0	520	0	0	520	0
19.4882	0	520	0	520	0	520	0	520	0	520	0	520	0	520	0	520	0	0	520	0
19.4992	0	520	0	520	0	520	0	520	0	520	0	520	0	520	0	520	0	0	520	0
19.5102	0	520	0	520	0	520	0	520	0	520	0	520	0	520	0	520	0	0	520	0
19.5213	0	520	0	520	0	520	0	520	0	520	0	520	0	520	0	520	0	0	520	0
19.5323	0	520	0	520	0	520	0	520	0	520	0	520	0	520	0	520	0	0	520	0
19.5433	0	520	0	520	0	520	0	520	0	520	0	520	0	520	0	520	0	0	520	0
19.5544	0	520	0	520	0	520	0	520	0	520	0	520	0	520	0	520	0	0	520	0
19.5654	0	520	0	520	0	520	0	520	0	520	0	520	0	520	0	520	0	0	520	0
19.5764	0	520	0	520	0	520	0	520	0	520	0	520	0	520	0	520	0	0	520	0
19.5875	0	520	0	520	0	520	0	520	0	520	0	520	0	520	0	520	0	0	520	0
19.5985	0	520	0	520	0	520	0	520	0	520	0	520	0	520	0	520	0	0	520	0
19.6096	0	520	0	520	0	520	0	520	0	520	0	520	0	520	0	520	0	0	520	0
19.6206	0	520	0	520	0	520	0	520	0	520	0	520	0	520	0	520	0	0	520	0
19.6316	0	520	0	520	0	520	0	520	0	520	0	520	0	520	0	520	0	0	520	0
19.6427	0	520	0	520	0	520	0	520	0	520	0	520	0	520	0	520	0	0	520	0
19.6537	0	520	0	520	0	520	0	520	0	520	0	520	0	520	0	520	0	0	520	0
19.6647	0	520	0	520	0	520	0	520	0	520	0	520	0	520	0	520	0	0	520	0
19.6758	0	520	0	520	0	520	0	520	0	520	0	520	0	520	0	520	0	0	520	0
19.6868	0	520	0	520	0	520	0	520	0	520	0	520	0	520	0	520	0	0	520	0
19.6978	0	520	0	520	0	520	0	520	0	520	0	520	0	520	0	520	0	0	520	0
19.7089	0	520	0	520	0	520	0	520	0	520	0	520	0	520	0	520	0	0	520	0
19.7199	0	520	0	520	0	520	0	520	0	520	0	520	0	520	0	520	0	0	520	0
19.7309	0	520	0	520	0	520	0	520	0	520	0	520	0	520	0	520	0	0	520	0
19.742	0	520	0	520	0	520	0	520	0	520	0	520	0	520	0	520	0	0	520	0
19.753	0	520	0	520	0	520	0	520	0	520	0	520	0	520	0	520	0	0	520	0
19.764	0	520	0	520	0	520	0	520	0	520	0	520	0	520	0	520	0	0	520	0
19.7751	0	520	0	520	0	520	0	520	0	520	0	520	0	520	0	520	0	0	520	0
19.7861	0	520	0	520	0	520	0	520	0	520	0	520	0	520	0	520	0	0	520	0
19.7972	0	520	0	520	0	520	0	520	0	520	0	520	0	520	0	520	0	0	520	0
19.8082	0	520	0	520	0	520	0	520	0	520	0	520	0	520	0	520	0	0	520	0
19.8192	0	520	0	520	0	520	0	520	0	520	0	520	0	520	0	520	0	0	520	0
19.8303	0	520	0	520	0	520	0	520	0	520	0	520	0	520	0	520	0	0	520	0
19.8413	0	520	0	520	0	520	0	520	0	520	0	520	0	520	0	520	0	0	520	0
19.8523	0	520	0	520	0	520	0	520	0	520	0	520	0	520	0	520	0	0	520	0
19.8634	0	520	0	520	0	520	0	520	0	520	0	520	0	520	0	520	0	0	520	0
19.8744	0	520	0	520	0	520	0	520	0	520	0	520	0	520	0	520	0	0	520	0
19.8854	0	520	0	520	0	520	0	520	0	520	0	520	0	520	0	520	0	0	520	0
19.8965	0	520	0	520	0	520	0	520	0	520	0	520	0	520	0	520	0	0	520	0
19.9075	0	520	0	520	0	520	0	520	0	520	0	520	0	520	0	520	0	0	520	0
19.9185	0	520	0	520	0	520	0	520	0	520	0	520	0	520	0	520	0	0	520	0
19.9296	0	520	0	520	0	520	0	520	0	520	0	520	0	520	0	520	0	0	520	0
19.9406	0	520	0	520	0	520	0	520	0	520	0	520	0	520	0	520	0	0	520	0
19.9516	0	520	0	520	0	520	0	520	0	520	0	520	0	520	0	520	0	0	520	0
19.9627	0	520	0	520	0	520	0	520	0	520	0	520	0	520	0	520	0	0	520	0
19.9737	0	520	0	520	0	520	0	520	0	520	0	520	0	520	0	520	0	0	520	0
19.9848	0	520	0	520	0	520	0	520	0	520	0	520	0	520	0	520	0	0	520	0
19.9958	0	520	0	520	0	520	0	520	0	520	0	520	0	520	0	520	0	0	520	0
20.0068	0	520	0	520	0	520	0	520	0	520	0	520	0	520	0	520	0	0	520	0
20.0179	0	520	0	520	0	520	0	520	0	520	0	520	0	520	0	520	0	0	520	0
20.0289	0	520	0	520	0	520	0	520	0	520	0	520	0	520	0	520	0	0	520	0
20.0399	0	520	0	520	0	520	0	520	0	520	0	520	0	520	0	520	0	0	520	0
20.051	0	520	0	520	0	520	0	520	0	520	0	520	0	520	0	520	0	0	520	0
20.062	0	520	0	520	0	520	0	520	0	520	0	520	0	520	0	520	0	0	520	0
20.073	0	520	0	520	0	520	0	520	0	520	0	520	0	520	0	520	0	0	520	0
20.0841	0	520	0	520	0	520	0	520	0	520	0	520	0	520	0	520	0	0	520	0
20.0951	0	520	0	520	0	520	0	520	0	520	0	520	0	520	0	520	0	0	520	0
20.1061	0	520	0	520	0	520	0	520	0	520	0	520	0	520	0	520	0	0	520	0
20.1172	0	520	0	520	0	520	0	520	0	520	0	520	0	520	0	520	0	0	520	0
20.1282	0	520	0	520	0	520	0	520	0	520	0	520	0	520	0	520	0	0	520	0
20.1392	0	520	0	520	0	520	0	520	0	520	0	520	0	520	0	520	0	0	520	0
20.1503	0	520	0	520	0	520	0	520	0	520	0	520	0	520	0	520	0	0	520	0
20.1613	0	520	0	520	0	520	0	520	0	520	0	520	0	520	0	520	0	0	520	0
20.1724	0	520	0	520	0	520	0	520	0	520	0	520	0	520	0	520	0	0	520	0
20.1834	0	520	0	520	0	520	0	520	0	520	0	520	0	520	0	520	0	0	520	0
20.1944	0	520	0	520	0	520	0	520	0	520	0	520	0	520	0	520	0	0	520	0
20.2055	0	520	0	520	0	520	0	520	0	520	0	520	0	520	0	520	0	0	520	0
20.2165	-4.32	520	0.33	520	-1.06	520	-0.76	520	0.3	520	-1.67	520	0.22	520	5.38	520	-0.1975	0.963922	520	0
20.2275	-4.75	520	0.68	520	-1.18	520	-0.49	520	-0.25	520	-1.41	520	-0.41	520	5.32	520	-0.31125	0.985642	520	0
20.2386	-4.69	524	0.1	520	-1.35	521	-1.22	520	-0.23	520	-1.97	521	-0.41	520	6.07	515	-0.4625	1.07365	520.125	0.875
20.2496	-4.52	528	0.28	520	-0.99	522	-1.03	520	-0.16	520	-1.53	522	-0.66	520	6.73	509	-0.235	1.11965	520.125	1.85585
20.2606	-3.9	532	-0.02	520	-1.01	522	-0.97	521	-0.05	520	-1.34	523	-0.12	520	5.77	503	-0.205	0.963074	520.125	2.82487
20.2717	-4.95	535	-0.46	520	-1.17	522	-0.53	521	-0.07	520	-1.22	524	-0.48	520	6.07	498	-0.35125	1.06859	520	3.6105
20.2827	-4.95	539	-0.04	520	-1.14	523	-0.64	521	0.12	520	-1.08	525	-0.99	520	5.56	492	-0.395	1.01805	520	4.59036
20.2937	-4.57	543	-0.22	520	-1.3	524	-1.13	521	-0.1	520	-1.32	526	-1.08	520	5.28	487	-0.555	0.965782	520.125	5.46233
20.3048	-4.21	547	0.09	520	-1.56	525	-1.19	521	-0.04	520	-1.75	527	-0.49	520	5.3	482	-0.48125	0.955466	520.25	6.33513
20.3158	-4.54	551	0.03	520	-1.46	526	-1.77	522	0.05	520	-1.25	528	0.07	520	5.15	477	-0.465	0.965842	520.5	7.2111
20.3268	-4.36	555	-0.43	520	-1.23	527	-1.6	523	-0.05	520	-1.84	529	0.09	520	4.75	472	-0.58375	0.911239	520.75	8.08824
20.3379	-4.38	559	0.09	520	-1.45	528	-1.72	524	0.31	520	-1.21	530	0.68	520	5.01	468	-0.33375	0.949483	521.125	8.85889
20.3489	-4.97	563	-0.12	520	-1.39	529	-1.54	525	0.17	520	-1.08	531	0.48	520	4.51	463	-0.4925	0.933927	521.375	9.73751
20.3599	-4.86	567	0.09	520	-1.12	530	-1.75	526	0.35	520	-2	532	0.77	520	5.63	459	-0.36125	1.06329	521.75	10.5098
20.371	-4.25	571	-0.11	520	-1.06	531	-2.23	527	-0.16	520	-1.5	533	1.01	520	5.73	454	-0.32125	1.03055	522	11.3892
20.382	-4.67	575	-0.03	520	-1.07	532	-1.67	529	-0.3	520	-1.29	534	1.08	520	6.84	449	-0.13875	1.15955	522.375	12.2779
20.3931	-3.64	579	-0.32	520	-0.98	533	-1.21	530	-0.55	520	-1.56	535	1.55	519	7.87	443	0.145	1.21511	522.375	13.2691
20.4041	-2.73	582	-0.02	520	-1.25	533	-1.5	531	-0.3	520	-1.16	536	1.35	518	7.33	436	0.215	1.101	522	14.2791
20.4151	-1.62	584	0.55	520	-1.08	533	-2.41	532	-0.41	520	-1.45	537	0.67	517	6.97	429	0.1525	1.04382	521.5	15.2186
20.4262	-0.87	585	0.04	520	-1.2	534	-2.11	534	-0.31	520	-1.54	538	-0.15	517	7.48	423	0.1675	1.07626	521.375	16.0044
20.4372	0.47	585	0.19	520	-1.05	535	-1.79	536	-0.38	520	-0.93	539	-0.31	517	7.46	416	0.4575	1.03204	521	16.8417
20.4482	2.07	585	0	520	-1.08	536	-2.03	537	-0.36	520	-0.95	539	0.7	517	7.06	409	0.67625	1.01136	520.375	17.6574
20.4593	1.49	585	-0.04	520	-1.05	537	-1.88	539	-0.32	520	-0.62	539	0.88	517	6.35	402	0.60125	0.901886	519.875	18.5014
20.4703	-1.92	584	0.18	520	-1.25	538	-1.16	540	0.13	520	-0.76	539	1.49	517	5.44	400	0.26875	0.828696	519.75	18.7033
20.4813	-3.19	583	0.13	520	-1.44	539	-1.34	541	-0.03	520	-0.4	539	1.42	517	5.39	400	0.0675	0.898959	519.875	18.68
20.4924	-3.37	586	0.23	520	-1.39	540	-1.26	542	-0.55	520	-0.44	539	1.44	516	6.28	400	0.1175	1.00736	520.375	18.9057
20.5034	-3.44	589	0.25	520	-1.32	541	-0.93	543	-0.61	520	-0.07	539	0.21	515	7.86	400	0.24375	1.16672	520.875	19.1381
20.5144	-2.79	592	0.63	520	-1.39	542	-0.51	543	-0.95	520	-0.47	539	0	515	7.62	400	0.2675	1.10993	521.375	19.3501
20.5255	-2.98	594	0.44	520	-1	543	-1	543	-0.94	520	-0.43	539	-0.65	515	6.36	400	-0.025	0.972934	521.75	19.5007
20.5365	-1.99	596	0.47	520	-1.6	543	-1.01	543	-0.71	520	0.04	539	-0.91	515	5.45	400	-0.0325	0.832262	522	19.6342
20.5475	-1.8	597	0.26	520	-1.16	543	-1.08	544	-0.68	520	0.38	539	-0.58	515	5.61	400	0.11875	0.825077	522.25	19.721
20.5586	-2.89	598	0.12	520	-1.06	544	-1.07	545	0.27	520	0.64	539	-0.93	515	4.76	400	-0.02	0.786457	522.625	19.8278
20.5696	-3.47	600	0.24	520	-1.13	545	-1.25	546	0.08	520	-0.04	539	-0.98	515	4.71	400	-0.23	0.820139	523.125	20.004
20.5807	-3.82	600	0.34	520	-1.13	546	-1.58	547	-0.07	520	0.03	539	-1.38	515	4.9	400	-0.33875	0.881187	523.375	20.0445
20.5917	-2.83	600	0.28	520	-1.32	547	-1.2	548	-0.3	520	-0.18	539	-1.55	515	5.32	400	-0.2225	0.862937	523.625	20.0864
20.6027	-2.52	600	0.41	520	-1.52	548	-1.01	549	-0.16	520	-0.34	539	-0.66	516	5.9	400	0.0125	0.898755	524	20.1219
20.6138	-2.16	600	0.31	520	-0.99	549	-1.54	550	0.03	520	-0.54	539	-0.93	516	6.4	400	0.0725	0.946693	524.25	20.1661
20.6248	-2.03	600	0	520	-1.13	549	-1.13	551	0.51	520	-0.07	539	-0.91	516	6.03	400	0.15875	0.885671	524.375	20.1892
20.6358	-1.49	600	0.03	520	-1.08	549	-0.99	552	0.46	520	-0.44	539	-1.45	516	6.34	400	0.1725	0.914494	524.5	20.2131
20.6469	0.22	600	0.28	520	-0.96	550	-0.92	552	0.71	520	-0.77	539	-0.92	516	6.99	400	0.57875	0.945088	524.625	20.2352
20.6579	1.59	600	0.41	520	-1	550	-0.83	552	0.89	520	-0.87	539	-0.35	516	5.85	400	0.71125	0.804364	524.625	20.2352
20.6689	1.43	600	0.37	520	-1.04	550	-1.23	552	0.71	520	-1.17	539	-0.11	516	6.67	400	0.70375	0.917958	524.625	20.2352
20.68	-0.01	599	0.26	520	-1.3	551	-0.98	552	0.51	520	-1.41	539	0.5	516	6.81	400	0.5475	0.937268	524.625	20.1919
20.691	-1.43	599	-0.44	520	-0.9	552	-1.15	552	0.24	520	-1.1	540	0.21	516	5.99	400	0.1775	0.85889	524.875	20.2285
20.702	-0.88	599	0.39	520	-0.97	552	-1.2	552	0.08	520	-1.66	541	0.15	516	6.44	400	0.29375	0.914908	525	20.2423
20.7131	-1.5	599	0.09	520	-1.27	552	-1.03	553	-0.39	520	-1.65	542	0.79	516	5.93	400	0.12125	0.88113	525.25	20.2808
20.7241	-1.59	599	0.19	520	-1.23	552	-0.95	554	-0.16	520	-2.52	543	1.63	516	5.32	400	0.08625	0.868654	525.5	20.3206
20.7351	-2.02	600	0.35	520	-0.99	553	-0.62	554	-0.69	520	-2.23	545	1.26	516	4.7	400	-0.03	0.787024	526	20.4407
20.7462	-2.32	600	-0.23	520	-1.41	553	-0.78	554	-0.59	520	-2.25	547	1.28	515	4.8	400	-0.1875	0.822014	526.125	20.4847
20.7572	-1.72	600	-0.08	520	-1.23	553	-0.77	554	-1.09	520	-2.49	549	1.08	514	5.31	400	-0.12375	0.862914	526.25	20.5329
20.7683	-1.03	600	0.01	520	-1.47	554	-0.38	554	-1.43	520	-2.41	551	0.76	513	5.11	400	-0.105	0.82181	526.5	20.6086
20.7793	-0.77	600	-0.15	520	-1.4	555	-0.93	554	-1.21	521	-2.2	553	0.44	513	4.48	400	-0.2175	0.727397	527	20.6709
20.7903	-0.14	600	-0.17	520	-1.71	556	-0.95	554	-1.29	522	-2.58	555	0.31	513	3.71	400	-0.3525	0.668978	527.5	20.7364
20.8014	0.35	600	-0.34	520	-1.87	557	-1.12	554	-1.47	523	-2.53	557	-0.23	513	4.56	400	-0.33125	0.773673	528	20.8052
20.8124	0.55	600	-0.2	520	-1.65	558	-1.28	554	-0.95	524	-2.67	559	-1.1	513	4.37	400	-0.36625	0.755558	528.5	20.8772
20.8234	0.66	600	-0.33	520	-1.34	559	-1.46	555	-0.65	524	-2.25	561	-1.76	513	3.77	400	-0.42	0.679496	529	20.9779
20.8345	0.17	600	0.18	520	-1.41	560	-2.04	556	-0.81	524	-2.26	563	-0.73	514	3.23	400	-0.45875	0.616107	529.625	21.0679
20.8455	-1.41	600	-0.01	520	-1.53	561	-2.11	558	-0.64	524	-2.68	565	0.32	514	3.09	400	-0.62125	0.639979	530.25	21.197
20.8565	-1.53	600	0.03	520	-1.11	562	-2.84	560	-0.74	524	-2.57	567	0.15	514	2.46	400	-0.76875	0.599677	530.875	21.3303
20.8676	-2.31	600	0.27	520	-1.8	563	-2.86	562	-0.23	524	-1.89	569	0.04	514	1.86	400	-0.865	0.565827	531.5	21.4676
20.8786	-2.02	600	0.31	520	-1.68	564	-2.89	564	-0.01	524	-2.37	570	1.43	514	1.71	400	-0.69	0.628607	532	21.5771
20.8896	-2.58	600	0.13	520	-1.34	565	-3.21	566	0.39	524	-2.59	572	1.5	514	1.23	400	-0.80875	0.65688	532.625	21.7214
20.9007	-3.58	600	-0.11	520	-1.19	566	-2.85	569	-0.15	524	-2.14	574	1.94	513	0.86	400	-0.9025	0.66757	533.25	21.9144
20.9117	-3.55	600	0.45	520	-0.99	567	-3.21	571	-0.55	524	-1.96	576	0.92	512	0.87	400	-1.0025	0.623878	533.75	22.0849
20.9227	-4.11	600	0.19	520	-0.92	567	-3.19	574	-0.27	524	-1.9	577	0.25	512	0.98	400	-1.12125	0.635257	534.25	22.2122
20.9338	-5.15	600	-0.15	520	-1.61	567	-3.14	577	-0.59	524	-2.2	578	-0.17	512	0.06	400	-1.61875	0.644406	534.75	22.3453
20.9448	-5.29	600	-0.16	520	-1.57	567	-3.92	580	-0.35	524	-1.7	580	-1.27	512	0.39	400	-1.73375	0.688832	535.375	22.519
20.9558	-4.84	600	-0.05	520	-1.59	568	-4.29	583	-0.29	524	-1.68	581	-1.61	512	0.04	400	-1.78875	0.658237	536	22.6881
20.9669	-5.04	600	0.56	520	-1.32	569	-3.41	587	-0.43	524	-1.39	582	-0.96	513	-0.09	400	-1.51	0.653174	536.875	22.882
20.9779	-4.3	600	0.65	520	-1.36	570	-3.41	590	-0.88	524	-1.39	583	-1.19	513	-0.74	400	-1.5775	0.553437	537.5	23.062
20.989	-4.46	600	0.46	520	-1.28	571	-2.84	593	-0.59	524	-1.83	584	-0.45	513	-1.27	400	-1.5325	0.543322	538.125	23.2467
21	-4.55	600	0.43	520	-1.16	572	-3.02	595	-0.85	524	-1.51	585	-1.12	513	-0.39	400	-1.52125	0.554992	538.625	23.3926
21.011	-4.23	600	0.28	520	-1	573	-2.11	598	-0.41	524	-0.93	586	-1.13	513	-0.89	400	-1.3025	0.480947	539.25	23.5848
21.0221	-4.55	600	0.07	520	-1.19	573	-2.43	600	-0.2	524	-1.63	586	-0.82	514	-0.82	400	-1.44625	0.52333	539.625	23.6552
21.0331	-4.78	600	0.04	520	-1.04	573	-2.18	600	-0.18	524	-1.06	586	-0.28	514	-0.15	400	-1.20375	0.572413	539.625	23.6552
21.0441	-4.49	600	-0.04	520	-1.02	574	-1.86	600	0.2	524	-1.07	587	-0.88	514	0.26	400	-1.1125	0.547516	539.875	23.7159
21.0552	-4.64	600	0.2	520	-1.34	575	-1.4	600	-0.09	524	-1.08	588	-0.73	514	0.4	400	-1.085	0.563389	540.125	23.7776
21.0662	-4.42	600	0.04	520	-1.07	576	-1.55	600	0.13	524	-0.11	589	-0.78	514	-0.62	400	-1.0475	0.523197	540.375	23.8402
21.0772	-4.23	600	0.1	520	-1.26	577	-1.82	600	-0.37	524	-0.15	589	-0.56	514	-1.18	400	-1.18375	0.490229	540.5	23.8672
21.0883	-4.39	600	-0.12	520	-1.13	578	-1.49	600	-0.14	524	-0.08	589	-0.47	514	-1.51	400	-1.16625	0.50761	540.625	23.8948
21.0993	-3.48	600	-0.01	520	-1.01	579	-1.34	600	-0.27	524	-0.24	589	0.02	514	-1.77	401	-1.0125	0.422339	540.875	23.8181
21.1103	-2	600	-0.02	520	-1.25	580	-1.25	600	-0.58	524	0.44	589	1	514	-0.87	402	-0.56625	0.349673	541.125	23.7422
21.1214	-0.59	600	-0.05	520	-1.42	581	-1.45	600	-0.63	524	0.17	589	0.73	514	-0.57	402	-0.47625	0.265202	541.25	23.7718
21.1324	0.34	600	0.19	520	-0.99	582	-0.61	600	-0.96	524	0.11	589	0.63	514	-0.88	402	-0.27125	0.232236	541.375	23.802
21.1434	0.56	600	0.05	520	-1.14	582	-1.19	600	-0.86	524	0.62	589	1.35	514	-1.13	402	-0.2175	0.350427	541.375	23.802
21.1545	0.91	600	-0.2	520	-1.53	582	-1.2	600	-1.35	524	0.08	589	1.37	514	-0.41	402	-0.29125	0.374268	541.375	23.802
21.1655	-0.54	600	-0.25	520	-1.18	583	-0.96	600	-0.18	524	-0.23	589	1.84	513	-1.37	402	-0.35875	0.353207	541.375	23.8537
21.1766	-0.9	600	-0.46	520	-1.02	584	-1.35	600	-0.69	524	-0.47	589	1.74	512	-1.56	402	-0.58875	0.3603	541.375	23.9068
21.1876	-0.38	600	0.05	520	-1.11	585	-0.99	600	-0.58	524	-0.46	589	1.6	511	-1.44	403	-0.41375	0.331964	541.5	23.8575
21.1986	-0.69	600	-0.01	520	-1.12	586	-0.59	600	-0.29	524	-0.75	589	0.66	510	-1.58	404	-0.54625	0.241653	541.625	23.8102
21.2097	-1.21	600	0.3	520	-1.07	587	-0.27	600	-0.56	524	-1.33	589	-0.98	510	-1.73	405	-0.85625	0.229222	541.875	23.7407
21.2207	-1.14	600	-0.01	520	-0.93	588	-0.46	600	-0.54	524	-1.36	589	-1.08	510	-1.67	406	-0.89875	0.189487	542.125	23.6722
21.2317	-0.04	600	0.05	520	-1.2	588	-0.44	600	0.01	524	-1.34	590	-0.9	510	-1.78	407	-0.705	0.247689	542.375	23.6053
21.2428	0.62	600	-0.19	520	-1.45	588	-0.39	600	0.08	524	-2.07	591	-1.48	510	-2.03	408	-0.86375	0.361277	542.625	23.5394
21.2538	-0.46	600	0.08	520	-1.27	589	-0.8	600	-0.14	524	-1.84	593	-1.86	510	-1.43	410	-0.965	0.264939	543.25	23.445
21.2648	-1.07	600	0.09	520	-1.55	590	-0.71	600	-0.7	524	-1.76	594	-1.66	511	-2.21	411	-1.19625	0.26182	543.75	23.3917
21.2759	0.05	600	-0.02	520	-1.21	591	-0.9	600	-0.33	524	-2.01	595	-1.08	512	-1.69	413	-0.89875	0.266809	544.375	23.2386
21.2869	0.27	600	-0.21	520	-1.34	592	-0.82	600	-0.4	524	-1.41	597	-1.26	513	-2.08	414	-0.90625	0.269814	545	23.2279
21.2979	-1.41	600	-0.04	520	-1.52	593	-1.29	600	-0.6	524	-1.97	598	-1.51	514	-1.88	416	-1.2775	0.230045	545.625	23.079
21.309	-2.83	600	-0.18	520	-1.4	594	-1.99	600	0.01	524	-2.38	599	-1.63	515	-2.05	417	-1.55625	0.35632	546.125	23.0321
21.32	-3.89	600	-0.17	520	-1.05	595	-2.34	600	-0.29	524	-2.16	600	-1.36	516	-2.31	419	-1.69625	0.436225	546.75	22.887
21.331	-3.65	600	-0.28	520	-1.46	596	-2.5	600	-0.74	524	-2.12	600	-1.15	517	-1.29	421	-1.64875	0.379475	547.25	22.7021
21.3421	-4.2	600	-0.01	520	-1.18	597	-2.32	600	-0.21	524	-1.91	600	-0.3	518	-1.25	422	-1.4225	0.49229	547.625	22.6179
21.3531	-4.12	600	0.05	520	-1.45	598	-2.29	600	0.02	524	-1.67	600	-0.87	518	-1.56	423	-1.48625	0.47494	547.875	22.5582
21.3642	-4.13	600	0.26	520	-1.54	599	-1.7	600	0.2	524	-1.94	600	-0.35	518	-1.25	424	-1.30625	0.503991	548.125	22.4996
21.3752	-4.76	600	-0.06	520	-1.62	600	-2.15	600	-0.55	524	-1.69	600	-0.54	518	-0.96	425	-1.54125	0.522294	548.375	22.4419
21.3862	-5	600	-0.16	520	-1.26	600	-1.42	600	0.12	524	-1.43	600	0.69	518	-0.99	425	-1.18125	0.612114	548.375	22.4419
21.3973	-4.73	600	0.42	520	-1.39	600	-1.67	600	-0.49	524	-1.6	600	0.66	518	-0.49	425	-1.16125	0.596988	548.375	22.4419
21.4083	-4.68	600	0.02	520	-0.98	600	-1.78	600	-0.36	524	-1.54	600	0.26	518	-1.13	425	-1.27375	0.549314	548.375	22.4419
21.4193	-5.19	600	-0.41	520	-1.68	600	-1.21	600	-0.3	524	-1.48	600	0.06	518	-0.39	425	-1.325	0.594345	548.375	22.4419
21.4304	-5.98	600	-0.46	520	-1.14	600	-1.24	600	-0.21	524	-1.32	600	0.01	518	-0.99	425	-1.41625	0.675196	548.375	22.4419
21.4414	-5.18	600	-0.01	520	-1.13	600	-1.11	600	-0.4	524	-0.68	600	-0.41	518	-1.3	425	-1.2775	0.578884	548.375	22.4419
21.4524	-5.7	600	0.03	520	-0.87	600	-0.89	600	-0.59	524	-0.37	600	-0.82	518	-0.99	425	-1.275	0.643267	548.375	22.4419
21.4635	-5.6	600	0.11	520	-1.39	600	-0.96	600	-0.37	524	-1.02	600	-0.17	518	-0.85	425	-1.28125	0.641172	548.375	22.4419
21.4745	-6.45	600	0.17	520	-0.99	600	-0.8	600	-0.74	524	-0.37	600	0.27	518	-0.12	425	-1.12875	0.777251	548.375	22.4419
21.4855	-6.49	600	-0.21	520	-1.27	600	-0.81	600	-0.56	524	-0.5	600	-0.06	518	-0.27	425	-1.27125	0.757636	548.375	22.4419
21.4966	-6.39	600	0.24	520	-1.29	600	-0.81	600	-0.7	524	-0.11	600	0.14	518	0.16	425	-1.095	0.781082	548.375	22.4419
21.5076	-6.23	600	-0.04	520	-1.13	600	-0.85	600	-0.59	524	0.12	600	-0.02	518	-0.43	425	-1.14625	0.742229	548.375	22.4419
21.5186	-5.23	600	-0.08	520	-0.9	600	-1.15	600	-0.35	524	-0.11	600	-0.52	518	-0.64	425	-1.1225	0.600987	548.375	22.4419
21.5297	-5.58	600	-0.23	520	-1.18	600	-1.64	600	-0.51	524	-0.9	600	-1.14	518	-0.75	425	-1.49125	0.603751	548.375	22.4419
21.5407	-4.69	600	0.03	520	-1.44	600	-1.23	600	-1.08	524	-0.21	600	-1.09	518	-0.53	425	-1.28	0.52023	548.375	22.4419
21.5518	-5.21	600	0.02	520	-1.39	600	-1.08	600	-0.61	524	-0.18	600	-1.33	519	-0.77	425	-1.31875	0.58396	548.5	22.4181
21.5628	-4.93	600	0.23	520	-1.34	600	-1.11	600	-1.18	524	0.23	600	-1.47	520	-1.63	425	-1.4	0.566452	548.625	22.3949
21.5738	-3.85	600	0.1	520	-1.43	600	-1.37	600	-0.44	524	-0.03	600	-2.33	521	-1.85	425	-1.4	0.465223	548.75	22.3725
21.5849	-4.26	600	0	520	-1.15	600	-1.12	600	-0.46	524	-0.12	600	-2.32	523	-1.74	426	-1.39625	0.495775	549.125	22.2305
21.5959	-3.74	600	0.18	520	-1.39	600	-1.63	600	-0.54	524	-0.3	600	-1.36	525	-0.79	427	-1.19625	0.422919	549.5	22.0907
21.6069	-3.8	600	0.07	520	-1.22	600	-1.7	600	-0.63	524	-0.74	600	-1.4	526	-1.09	427	-1.31375	0.403299	549.625	22.0713
21.618	-3.97	600	0.12	520	-1.31	600	-1.45	600	-1.09	524	-0.75	600	-1.36	527	-1.26	427	-1.38375	0.411087	549.75	22.0525
21.629	-4	600	0.04	520	-1.16	600	-1.41	600	-0.18	524	-0.71	600	-0.94	528	-1.47	428	-1.22875	0.439921	550	21.935
21.64	-3.64	600	-0.22	520	-1.43	600	-1.35	600	-0.21	524	-0.81	600	-1.43	528	-2.06	429	-1.39375	0.392196	550.125	21.8358
21.6511	-3.08	600	-0.33	520	-1.29	600	-1.39	600	-0.54	524	-0.87	600	-0.88	528	-1.95	431	-1.29125	0.312772	550.375	21.6382
21.6621	-1.45	600	-0.28	520	-1.06	600	-1.34	600	-0.34	524	-1.39	600	-0.54	528	-2.62	432	-1.1275	0.271693	550.5	21.5398
21.6731	-1.07	600	-0.26	520	-1.31	600	-1.17	600	-0.36	524	-1.1	600	-0.18	528	-2.3	434	-0.96875	0.248269	550.75	21.3439
21.6842	-2.18	600	0.01	520	-1.14	600	-1.3	600	-0.45	524	-1.21	600	0.83	528	-2.34	436	-0.9725	0.378133	551	21.1491
21.6952	-1.87	600	0.21	520	-1.15	600	-1.17	600	-0.58	524	-0.89	600	1.66	528	-2.65	438	-0.805	0.462037	551.25	20.9555
21.7062	-1.74	600	0.18	520	-1.2	600	-0.88	600	-0.75	524	-1.56	600	2.03	528	-1.9	440	-0.7275	0.458401	551.5	20.7631
21.7173	-0.95	600	0.21	520	-0.93	600	-1.15	600	-0.99	524	-1.11	600	1.42	526	-1.34	441	-0.605	0.333542	551.375	20.7097
21.7283	-0.92	600	0.45	520	-0.86	600	-1.37	600	-0.91	524	-1.04	600	0.96	525	-0.55	442	-0.53	0.285106	551.375	20.6371
21.7393	-0.35	600	-0.16	520	-0.91	600	-1.11	600	-0.23	524	-1.4	600	0.66	525	-0.34	442	-0.48	0.228708	551.375	20.6371
21.7504	0.38	600	0.37	520	-0.84	600	-1	600	-0.02	524	-1.54	600	0.13	525	-0.21	442	-0.34125	0.249581	551.375	20.6371
21.7614	0.22	600	0.33	520	-1.1	600	-1.19	600	-0.03	524	-1.76	600	0.57	525	-0.54	442	-0.4375	0.297824	551.375	20.6371
21.7725	-0.71	600	0.3	520	-1.13	600	-2.12	600	0.06	524	-1.58	600	-0.17	525	-0.26	442	-0.70125	0.299639	551.375	20.6371
21.7835	-1.79	600	0.11	520	-1.1	600	-2.61	600	0.01	524	-2.34	600	-0.61	525	-0.31	442	-1.08	0.374428	551.375	20.6371
21.7945	-3.17	600	-0.1	520	-1.46	600	-2.61	600	-0.49	524	-1.31	600	-0.99	525	-0.89	442	-1.3775	0.367203	551.375	20.6371
21.8056	-3.91	600	0.07	520	-1.29	600	-2.98	600	-0.47	524	-1.56	600	-1.28	525	-0.26	442	-1.46	0.484495	551.375	20.6371
21.8166	-3.2	600	0	520	-1.27	600	-2.9	600	-0.8	524	-1.33	600	-1.19	525	-0.06	442	-1.34375	0.415034	551.375	20.6371
21.8276	-3.29	600	-0.43	520	-1.19	600	-3.04	600	-0.76	524	-1.34	600	-1.72	526	0.78	442	-1.37375	0.472629	551.5	20.6147
21.8387	-3.42	600	0.06	520	-0.83	600	-2.67	600	-1.01	524	-1.86	600	-1.85	527	1.83	442	-1.21875	0.580734	551.625	20.5929
21.8497	-3.34	600	0.28	520	-1.25	600	-2.65	600	-1.12	524	-1.56	600	-2.56	528	0.6	442	-1.45	0.492816	551.75	20.572
21.8607	-3.2	600	-0.02	520	-0.99	600	-2.12	600	-0.9	525	-1.06	600	-2.08	530	0.49	442	-1.235	0.422856	552.125	20.5082
21.8718	-3.68	600	-0.44	520	-1.35	600	-1.65	600	-0.68	525	-1.26	600	-1.69	532	1.64	442	-1.13875	0.52615	552.375	20.4712
21.8828	-3.19	600	-0.04	520	-1.43	600	-1.52	600	-1.49	525	-0.82	600	-1.21	533	2.49	442	-0.90125	0.57619	552.5	20.4538
21.8938	-3.47	600	-0.05	520	-1.27	600	-1.52	600	-1.41	525	-1.2	600	-1.11	534	2.81	440	-0.9025	0.626882	552.375	20.6311
21.9049	-2.16	600	0.46	520	-1.62	600	-1.33	600	-1.02	526	-1.29	600	-0.66	535	3.26	438	-0.545	0.607424	552.375	20.788
21.9159	-1.42	600	-0.14	520	-1.63	600	-2.34	600	-1.03	527	-1.42	600	-1.2	535	3.48	435	-0.7125	0.637167	552.125	21.0624
21.9269	-1.32	600	0.06	520	-1.33	600	-2.18	600	-0.51	528	-1.27	600	-1.13	535	3.2	432	-0.56	0.584753	551.875	21.3411
21.938	-2.35	600	0.08	520	-1.66	600	-2	600	-0.8	528	-0.54	600	-1.29	536	3.32	429	-0.655	0.633449	551.625	21.63
21.949	-2.95	600	0.24	520	-1.65	600	-2.06	600	-1.06	528	-1.25	600	-1.78	537	3.19	426	-0.915	0.668941	551.375	21.9227
21.9601	-3.23	600	0.52	520	-1.39	600	-1.96	600	-0.94	528	-0.87	600	-1.3	538	3.6	423	-0.69625	0.718249	551.125	22.2192
21.9711	-3.92	600	0.14	520	-1.72	600	-2.05	600	-0.92	528	-0.84	600	-1.19	539	3.75	420	-0.84375	0.777843	550.875	22.5194
21.9821	-3.56	600	0.08	520	-1.61	600	-2.26	600	-0.82	528	-0.96	600	-0.66	540	4.13	417	-0.7075	0.795767	550.625	22.823
21.9932	-3.37	600	0.44	520	-1.55	600	-1.73	600	-0.78	528	-0.95	600	0.95	540	3.41	413	-0.4475	0.724388	550.125	23.2428
22.0042	-3.36	600	0.44	520	-1.28	600	-1.96	600	-1.35	528	-1.04	600	1.88	540	4.13	410	-0.3175	0.841471	549.75	23.5598
22.0152	-2.27	600	0.51	520	-1.41	600	-1.65	600	-1.39	528	-0.87	600	1.88	540	3.65	406	-0.19375	0.724189	549.25	23.9849
22.0263	-1.78	600	0.3	520	-1.61	600	-1.87	600	-1.59	529	-1.32	600	1.15	539	2.74	403	-0.4975	0.604565	548.875	24.2976
22.0373	-1.59	600	0.55	520	-1.53	600	-1.82	600	-1.55	530	-0.82	600	0.3	538	2.9	401	-0.445	0.574372	548.625	24.5058
22.0483	0.05	600	0.48	520	-1.6	600	-2.12	600	-1.61	531	-0.54	600	-0.87	538	3.37	400	-0.355	0.616392	548.625	24.6003
[truncated: 1,212 more rows]
