# Supplementary material for: All-optical closed-loop voltage clamp for precise control of muscles and neurons in live animals
Source: Research Square preprint supplement (doi:10.21203/rs.3.rs-1505565/v1), 2023-03-29
Supplement: Supplementary file 13 [file bb32abe854591086dea964c5.xlsx]

## Sheet: ED Figure 9B
dF/F0_bleach_correct	Wavelength	dF/F0_bleach_correct	Wavelength	dF/F0_bleach_correct	Wavelength	dF/F0_bleach_correct	Wavelength	dF/F0_bleach_correct	Wavelength	dF/F0_bleach_correct	Wavelength	dF/F0_bleach_correct	Wavelength	dF/F0_bleach_correct	Wavelength	dF/F0_bleach_correct	Wavelength	dF/F0_bleach_correct	Wavelength	dF/F0_bleach_correct	Wavelength	dF/F0_bleach_correct	Wavelength	dF/F0_bleach_correct	Wavelength	Time	Wavelength	Mean DF/F0	SEM
0	525	0	525	0	525	0	525	0	525	0	525	0	525	0	525	0	525	0	525	0	525	0	525	0	525	0.01	525	0	0
0	525	0	525	0	525	0	525	0	525	0	525	0	525	0	525	0	525	0	525	0	525	0	525	0	525	0.02	525	0	0
0	525	0	525	0	525	0	525	0	525	0	525	0	525	0	525	0	525	0	525	0	525	0	525	0	525	0.03	525	0	0
0	525	0	525	0	525	0	525	0	525	0	525	0	525	0	525	0	525	0	525	0	525	0	525	0	525	0.0401	525	0	0
0	525	0	525	0	525	0	525	0	525	0	525	0	525	0	525	0	525	0	525	0	525	0	525	0	525	0.0501	525	0	0
0	525	0	525	0	525	0	525	0	525	0	525	0	525	0	525	0	525	0	525	0	525	0	525	0	525	0.0601	525	0	0
0	525	0	525	0	525	0	525	0	525	0	525	0	525	0	525	0	525	0	525	0	525	0	525	0	525	0.0701	525	0	0
0	525	0	525	0	525	0	525	0	525	0	525	0	525	0	525	0	525	0	525	0	525	0	525	0	525	0.0801	525	0	0
0	525	0	525	0	525	0	525	0	525	0	525	0	525	0	525	0	525	0	525	0	525	0	525	0	525	0.0901	525	0	0
0	525	0	525	0	525	0	525	0	525	0	525	0	525	0	525	0	525	0	525	0	525	0	525	0	525	0.1002	525	0	0
0	525	0	525	0	525	0	525	0	525	0	525	0	525	0	525	0	525	0	525	0	525	0	525	0	525	0.1102	525	0	0
0	525	0	525	0	525	0	525	0	525	0	525	0	525	0	525	0	525	0	525	0	525	0	525	0	525	0.1202	525	0	0
0	525	0	525	0	525	0	525	0	525	0	525	0	525	0	525	0	525	0	525	0	525	0	525	0	525	0.1302	525	0	0
0	525	0	525	0	525	0	525	0	525	0	525	0	525	0	525	0	525	0	525	0	525	0	525	0	525	0.1402	525	0	0
0	525	0	525	0	525	0	525	0	525	0	525	0	525	0	525	0	525	0	525	0	525	0	525	0	525	0.1502	525	0	0
0	525	0	525	0	525	0	525	0	525	0	525	0	525	0	525	0	525	0	525	0	525	0	525	0	525	0.1603	525	0	0
0	525	0	525	0	525	0	525	0	525	0	525	0	525	0	525	0	525	0	525	0	525	0	525	0	525	0.1703	525	0	0
0	525	0	525	0	525	0	525	0	525	0	525	0	525	0	525	0	525	0	525	0	525	0	525	0	525	0.1803	525	0	0
0	525	0	525	0	525	0	525	0	525	0	525	0	525	0	525	0	525	0	525	0	525	0	525	0	525	0.1903	525	0	0
0	525	0	525	0	525	0	525	0	525	0	525	0	525	0	525	0	525	0	525	0	525	0	525	0	525	0.2003	525	0	0
0	525	0	525	0	525	0	525	0	525	0	525	0	525	0	525	0	525	0	525	0	525	0	525	0	525	0.2103	525	0	0
0	525	0	525	0	525	0	525	0	525	0	525	0	525	0	525	0	525	0	525	0	525	0	525	0	525	0.2203	525	0	0
0	525	0	525	0	525	0	525	0	525	0	525	0	525	0	525	0	525	0	525	0	525	0	525	0	525	0.2304	525	0	0
0	525	0	525	0	525	0	525	0	525	0	525	0	525	0	525	0	525	0	525	0	525	0	525	0	525	0.2404	525	0	0
0	525	0	525	0	525	0	525	0	525	0	525	0	525	0	525	0	525	0	525	0	525	0	525	0	525	0.2504	525	0	0
0	525	0	525	0	525	0	525	0	525	0	525	0	525	0	525	0	525	0	525	0	525	0	525	0	525	0.2604	525	0	0
0	525	0	525	0	525	0	525	0	525	0	525	0	525	0	525	0	525	0	525	0	525	0	525	0	525	0.2704	525	0	0
0	525	0	525	0	525	0	525	0	525	0	525	0	525	0	525	0	525	0	525	0	525	0	525	0	525	0.2804	525	0	0
0	525	0	525	0	525	0	525	0	525	0	525	0	525	0	525	0	525	0	525	0	525	0	525	0	525	0.2905	525	0	0
0	525	0	525	0	525	0	525	0	525	0	525	0	525	0	525	0	525	0	525	0	525	0	525	0	525	0.3005	525	0	0
0	525	0	525	0	525	0	525	0	525	0	525	0	525	0	525	0	525	0	525	0	525	0	525	0	525	0.3105	525	0	0
0	525	0	525	0	525	0	525	0	525	0	525	0	525	0	525	0	525	0	525	0	525	0	525	0	525	0.3205	525	0	0
0	525	0	525	0	525	0	525	0	525	0	525	0	525	0	525	0	525	0	525	0	525	0	525	0	525	0.3305	525	0	0
0	525	0	525	0	525	0	525	0	525	0	525	0	525	0	525	0	525	0	525	0	525	0	525	0	525	0.3405	525	0	0
0	525	0	525	0	525	0	525	0	525	0	525	0	525	0	525	0	525	0	525	0	525	0	525	0	525	0.3506	525	0	0
0	525	0	525	0	525	0	525	0	525	0	525	0	525	0	525	0	525	0	525	0	525	0	525	0	525	0.3606	525	0	0
0	525	0	525	0	525	0	525	0	525	0	525	0	525	0	525	0	525	0	525	0	525	0	525	0	525	0.3706	525	0	0
0	525	0	525	0	525	0	525	0	525	0	525	0	525	0	525	0	525	0	525	0	525	0	525	0	525	0.3806	525	0	0
0	525	0	525	0	525	0	525	0	525	0	525	0	525	0	525	0	525	0	525	0	525	0	525	0	525	0.3906	525	0	0
0	525	0	525	0	525	0	525	0	525	0	525	0	525	0	525	0	525	0	525	0	525	0	525	0	525	0.4006	525	0	0
0	525	0	525	0	525	0	525	0	525	0	525	0	525	0	525	0	525	0	525	0	525	0	525	0	525	0.4106	525	0	0
0	525	0	525	0	525	0	525	0	525	0	525	0	525	0	525	0	525	0	525	0	525	0	525	0	525	0.4207	525	0	0
0	525	0	525	0	525	0	525	0	525	0	525	0	525	0	525	0	525	0	525	0	525	0	525	0	525	0.4307	525	0	0
0	525	0	525	0	525	0	525	0	525	0	525	0	525	0	525	0	525	0	525	0	525	0	525	0	525	0.4407	525	0	0
0	525	0	525	0	525	0	525	0	525	0	525	0	525	0	525	0	525	0	525	0	525	0	525	0	525	0.4507	525	0	0
0	525	0	525	0	525	0	525	0	525	0	525	0	525	0	525	0	525	0	525	0	525	0	525	0	525	0.4607	525	0	0
0	525	0	525	0	525	0	525	0	525	0	525	0	525	0	525	0	525	0	525	0	525	0	525	0	525	0.4707	525	0	0
0	525	0	525	0	525	0	525	0	525	0	525	0	525	0	525	0	525	0	525	0	525	0	525	0	525	0.4808	525	0	0
0	525	0	525	0	525	0	525	0	525	0	525	0	525	0	525	0	525	0	525	0	525	0	525	0	525	0.4908	525	0	0
0	525	0	525	0	525	0	525	0	525	0	525	0	525	0	525	0	525	0	525	0	525	0	525	0	525	0.5008	525	0	0
0	525	0	525	0	525	0	525	0	525	0	525	0	525	0	525	0	525	0	525	0	525	0	525	0	525	0.5108	525	0	0
0	525	0	525	0	525	0	525	0	525	0	525	0	525	0	525	0	525	0	525	0	525	0	525	0	525	0.5208	525	0	0
0	525	0	525	0	525	0	525	0	525	0	525	0	525	0	525	0	525	0	525	0	525	0	525	0	525	0.5308	525	0	0
0	525	0	525	0	525	0	525	0	525	0	525	0	525	0	525	0	525	0	525	0	525	0	525	0	525	0.5409	525	0	0
0	525	0	525	0	525	0	525	0	525	0	525	0	525	0	525	0	525	0	525	0	525	0	525	0	525	0.5509	525	0	0
0	525	0	525	0	525	0	525	0	525	0	525	0	525	0	525	0	525	0	525	0	525	0	525	0	525	0.5609	525	0	0
0	525	0	525	0	525	0	525	0	525	0	525	0	525	0	525	0	525	0	525	0	525	0	525	0	525	0.5709	525	0	0
0	525	0	525	0	525	0	525	0	525	0	525	0	525	0	525	0	525	0	525	0	525	0	525	0	525	0.5809	525	0	0
0	525	0	525	0	525	0	525	0	525	0	525	0	525	0	525	0	525	0	525	0	525	0	525	0	525	0.5909	525	0	0
0	525	0	525	0	525	0	525	0	525	0	525	0	525	0	525	0	525	0	525	0	525	0	525	0	525	0.601	525	0	0
0	525	0	525	0	525	0	525	0	525	0	525	0	525	0	525	0	525	0	525	0	525	0	525	0	525	0.611	525	0	0
0	525	0	525	0	525	0	525	0	525	0	525	0	525	0	525	0	525	0	525	0	525	0	525	0	525	0.621	525	0	0
0	525	0	525	0	525	0	525	0	525	0	525	0	525	0	525	0	525	0	525	0	525	0	525	0	525	0.631	525	0	0
0	525	0	525	0	525	0	525	0	525	0	525	0	525	0	525	0	525	0	525	0	525	0	525	0	525	0.641	525	0	0
0	525	0	525	0	525	0	525	0	525	0	525	0	525	0	525	0	525	0	525	0	525	0	525	0	525	0.651	525	0	0
0	525	0	525	0	525	0	525	0	525	0	525	0	525	0	525	0	525	0	525	0	525	0	525	0	525	0.661	525	0	0
0	525	0	525	0	525	0	525	0	525	0	525	0	525	0	525	0	525	0	525	0	525	0	525	0	525	0.6711	525	0	0
0	525	0	525	0	525	0	525	0	525	0	525	0	525	0	525	0	525	0	525	0	525	0	525	0	525	0.6811	525	0	0
0	525	0	525	0	525	0	525	0	525	0	525	0	525	0	525	0	525	0	525	0	525	0	525	0	525	0.6911	525	0	0
0	525	0	525	0	525	0	525	0	525	0	525	0	525	0	525	0	525	0	525	0	525	0	525	0	525	0.7011	525	0	0
0	525	0	525	0	525	0	525	0	525	0	525	0	525	0	525	0	525	0	525	0	525	0	525	0	525	0.7111	525	0	0
0	525	0	525	0	525	0	525	0	525	0	525	0	525	0	525	0	525	0	525	0	525	0	525	0	525	0.7211	525	0	0
0	525	0	525	0	525	0	525	0	525	0	525	0	525	0	525	0	525	0	525	0	525	0	525	0	525	0.7312	525	0	0
0	525	0	525	0	525	0	525	0	525	0	525	0	525	0	525	0	525	0	525	0	525	0	525	0	525	0.7412	525	0	0
0	525	0	525	0	525	0	525	0	525	0	525	0	525	0	525	0	525	0	525	0	525	0	525	0	525	0.7512	525	0	0
0	525	0	525	0	525	0	525	0	525	0	525	0	525	0	525	0	525	0	525	0	525	0	525	0	525	0.7612	525	0	0
0	525	0	525	0	525	0	525	0	525	0	525	0	525	0	525	0	525	0	525	0	525	0	525	0	525	0.7712	525	0	0
0	525	0	525	0	525	0	525	0	525	0	525	0	525	0	525	0	525	0	525	0	525	0	525	0	525	0.7812	525	0	0
0	525	0	525	0	525	0	525	0	525	0	525	0	525	0	525	0	525	0	525	0	525	0	525	0	525	0.7913	525	0	0
0	525	0	525	0	525	0	525	0	525	0	525	0	525	0	525	0	525	0	525	0	525	0	525	0	525	0.8013	525	0	0
0	525	0	525	0	525	0	525	0	525	0	525	0	525	0	525	0	525	0	525	0	525	0	525	0	525	0.8113	525	0	0
0	525	0	525	0	525	0	525	0	525	0	525	0	525	0	525	0	525	0	525	0	525	0	525	0	525	0.8213	525	0	0
0	525	0	525	0	525	0	525	0	525	0	525	0	525	0	525	0	525	0	525	0	525	0	525	0	525	0.8313	525	0	0
0	525	0	525	0	525	0	525	0	525	0	525	0	525	0	525	0	525	0	525	0	525	0	525	0	525	0.8413	525	0	0
0	525	0	525	0	525	0	525	0	525	0	525	0	525	0	525	0	525	0	525	0	525	0	525	0	525	0.8513	525	0	0
0	525	0	525	0	525	0	525	0	525	0	525	0	525	0	525	0	525	0	525	0	525	0	525	0	525	0.8614	525	0	0
0	525	0	525	0	525	0	525	0	525	0	525	0	525	0	525	0	525	0	525	0	525	0	525	0	525	0.8714	525	0	0
0	525	0	525	0	525	0	525	0	525	0	525	0	525	0	525	0	525	0	525	0	525	0	525	0	525	0.8814	525	0	0
0	525	0	525	0	525	0	525	0	525	0	525	0	525	0	525	0	525	0	525	0	525	0	525	0	525	0.8914	525	0	0
0	525	0	525	0	525	0	525	0	525	0	525	0	525	0	525	0	525	0	525	0	525	0	525	0	525	0.9014	525	0	0
0	525	0	525	0	525	0	525	0	525	0	525	0	525	0	525	0	525	0	525	0	525	0	525	0	525	0.9114	525	0	0
0	525	0	525	0	525	0	525	0	525	0	525	0	525	0	525	0	525	0	525	0	525	0	525	0	525	0.9215	525	0	0
0	525	0	525	0	525	0	525	0	525	0	525	0	525	0	525	0	525	0	525	0	525	0	525	0	525	0.9315	525	0	0
0	525	0	525	0	525	0	525	0	525	0	525	0	525	0	525	0	525	0	525	0	525	0	525	0	525	0.9415	525	0	0
0	525	0	525	0	525	0	525	0	525	0	525	0	525	0	525	0	525	0	525	0	525	0	525	0	525	0.9515	525	0	0
0	525	0	525	0	525	0	525	0	525	0	525	0	525	0	525	0	525	0	525	0	525	0	525	0	525	0.9615	525	0	0
0	525	0	525	0	525	0	525	0	525	0	525	0	525	0	525	0	525	0	525	0	525	0	525	0	525	0.9715	525	0	0
0	525	0	525	0	525	0	525	0	525	0	525	0	525	0	525	0	525	0	525	0	525	0	525	0	525	0.9816	525	0	0
0	525	0	525	0	525	0	525	0	525	0	525	0	525	0	525	0	525	0	525	0	525	0	525	0	525	0.9916	525	0	0
0	525	0	525	0	525	0	525	0	525	0	525	0	525	0	525	0	525	0	525	0	525	0	525	0	525	1.0016	525	0	0
0	525	0	525	0	525	0	525	0	525	0	525	0	525	0	525	0	525	0	525	0	525	0	525	0	525	1.0116	525	0	0
0	525	0	525	0	525	0	525	0	525	0	525	0	525	0	525	0	525	0	525	0	525	0	525	0	525	1.0216	525	0	0
0	525	0	525	0	525	0	525	0	525	0	525	0	525	0	525	0	525	0	525	0	525	0	525	0	525	1.0316	525	0	0
0	525	0	525	0	525	0	525	0	525	0	525	0	525	0	525	0	525	0	525	0	525	0	525	0	525	1.0416	525	0	0
0	525	0	525	0	525	0	525	0	525	0	525	0	525	0	525	0	525	0	525	0	525	0	525	0	525	1.0517	525	0	0
0	525	0	525	0	525	0	525	0	525	0	525	0	525	0	525	0	525	0	525	0	525	0	525	0	525	1.0617	525	0	0
0	525	0	525	0	525	0	525	0	525	0	525	0	525	0	525	0	525	0	525	0	525	0	525	0	525	1.0717	525	0	0
0	525	0	525	0	525	0	525	0	525	0	525	0	525	0	525	0	525	0	525	0	525	0	525	0	525	1.0817	525	0	0
0	525	0	525	0	525	0	525	0	525	0	525	0	525	0	525	0	525	0	525	0	525	0	525	0	525	1.0917	525	0	0
0	525	0	525	0	525	0	525	0	525	0	525	0	525	0	525	0	525	0	525	0	525	0	525	0	525	1.1017	525	0	0
0	525	0	525	0	525	0	525	0	525	0	525	0	525	0	525	0	525	0	525	0	525	0	525	0	525	1.1118	525	0	0
0	525	0	525	0	525	0	525	0	525	0	525	0	525	0	525	0	525	0	525	0	525	0	525	0	525	1.1218	525	0	0
0	525	0	525	0	525	0	525	0	525	0	525	0	525	0	525	0	525	0	525	0	525	0	525	0	525	1.1318	525	0	0
0	525	0	525	0	525	0	525	0	525	0	525	0	525	0	525	0	525	0	525	0	525	0	525	0	525	1.1418	525	0	0
0	525	0	525	0	525	0	525	0	525	0	525	0	525	0	525	0	525	0	525	0	525	0	525	0	525	1.1518	525	0	0
0	525	0	525	0	525	0	525	0	525	0	525	0	525	0	525	0	525	0	525	0	525	0	525	0	525	1.1618	525	0	0
0	525	0	525	0	525	0	525	0	525	0	525	0	525	0	525	0	525	0	525	0	525	0	525	0	525	1.1719	525	0	0
0	525	0	525	0	525	0	525	0	525	0	525	0	525	0	525	0	525	0	525	0	525	0	525	0	525	1.1819	525	0	0
0	525	0	525	0	525	0	525	0	525	0	525	0	525	0	525	0	525	0	525	0	525	0	525	0	525	1.1919	525	0	0
0	525	0	525	0	525	0	525	0	525	0	525	0	525	0	525	0	525	0	525	0	525	0	525	0	525	1.2019	525	0	0
0	525	0	525	0	525	0	525	0	525	0	525	0	525	0	525	0	525	0	525	0	525	0	525	0	525	1.2119	525	0	0
0	525	0	525	0	525	0	525	0	525	0	525	0	525	0	525	0	525	0	525	0	525	0	525	0	525	1.2219	525	0	0
0	525	0	525	0	525	0	525	0	525	0	525	0	525	0	525	0	525	0	525	0	525	0	525	0	525	1.2319	525	0	0
0	525	0	525	0	525	0	525	0	525	0	525	0	525	0	525	0	525	0	525	0	525	0	525	0	525	1.242	525	0	0
0	525	0	525	0	525	0	525	0	525	0	525	0	525	0	525	0	525	0	525	0	525	0	525	0	525	1.252	525	0	0
0	525	0	525	0	525	0	525	0	525	0	525	0	525	0	525	0	525	0	525	0	525	0	525	0	525	1.262	525	0	0
0	525	0	525	0	525	0	525	0	525	0	525	0	525	0	525	0	525	0	525	0	525	0	525	0	525	1.272	525	0	0
0	525	0	525	0	525	0	525	0	525	0	525	0	525	0	525	0	525	0	525	0	525	0	525	0	525	1.282	525	0	0
0	525	0	525	0	525	0	525	0	525	0	525	0	525	0	525	0	525	0	525	0	525	0	525	0	525	1.292	525	0	0
0	525	0	525	0	525	0	525	0	525	0	525	0	525	0	525	0	525	0	525	0	525	0	525	0	525	1.3021	525	0	0
0	525	0	525	0	525	0	525	0	525	0	525	0	525	0	525	0	525	0	525	0	525	0	525	0	525	1.3121	525	0	0
0	525	0	525	0	525	0	525	0	525	0	525	0	525	0	525	0	525	0	525	0	525	0	525	0	525	1.3221	525	0	0
0	525	0	525	0	525	0	525	0	525	0	525	0	525	0	525	0	525	0	525	0	525	0	525	0	525	1.3321	525	0	0
0	525	0	525	0	525	0	525	0	525	0	525	0	525	0	525	0	525	0	525	0	525	0	525	0	525	1.3421	525	0	0
0	525	0	525	0	525	0	525	0	525	0	525	0	525	0	525	0	525	0	525	0	525	0	525	0	525	1.3521	525	0	0
0	525	0	525	0	525	0	525	0	525	0	525	0	525	0	525	0	525	0	525	0	525	0	525	0	525	1.3622	525	0	0
0	525	0	525	0	525	0	525	0	525	0	525	0	525	0	525	0	525	0	525	0	525	0	525	0	525	1.3722	525	0	0
0	525	0	525	0	525	0	525	0	525	0	525	0	525	0	525	0	525	0	525	0	525	0	525	0	525	1.3822	525	0	0
0	525	0	525	0	525	0	525	0	525	0	525	0	525	0	525	0	525	0	525	0	525	0	525	0	525	1.3922	525	0	0
0	525	0	525	0	525	0	525	0	525	0	525	0	525	0	525	0	525	0	525	0	525	0	525	0	525	1.4022	525	0	0
0	525	0	525	0	525	0	525	0	525	0	525	0	525	0	525	0	525	0	525	0	525	0	525	0	525	1.4122	525	0	0
0	525	0	525	0	525	0	525	0	525	0	525	0	525	0	525	0	525	0	525	0	525	0	525	0	525	1.4223	525	0	0
0	525	0	525	0	525	0	525	0	525	0	525	0	525	0	525	0	525	0	525	0	525	0	525	0	525	1.4323	525	0	0
0	525	0	525	0	525	0	525	0	525	0	525	0	525	0	525	0	525	0	525	0	525	0	525	0	525	1.4423	525	0	0
0	525	0	525	0	525	0	525	0	525	0	525	0	525	0	525	0	525	0	525	0	525	0	525	0	525	1.4523	525	0	0
0	525	0	525	0	525	0	525	0	525	0	525	0	525	0	525	0	525	0	525	0	525	0	525	0	525	1.4623	525	0	0
0	525	0	525	0	525	0	525	0	525	0	525	0	525	0	525	0	525	0	525	0	525	0	525	0	525	1.4723	525	0	0
0	525	0	525	0	525	0	525	0	525	0	525	0	525	0	525	0	525	0	525	0	525	0	525	0	525	1.4823	525	0	0
0	525	0	525	0	525	0	525	0	525	0	525	0	525	0	525	0	525	0	525	0	525	0	525	0	525	1.4924	525	0	0
0	525	0	525	0	525	0	525	0	525	0	525	0	525	0	525	0	525	0	525	0	525	0	525	0	525	1.5024	525	0	0
0	525	0	525	0	525	0	525	0	525	0	525	0	525	0	525	0	525	0	525	0	525	0	525	0	525	1.5124	525	0	0
0	525	0	525	0	525	0	525	0	525	0	525	0	525	0	525	0	525	0	525	0	525	0	525	0	525	1.5224	525	0	0
0	525	0	525	0	525	0	525	0	525	0	525	0	525	0	525	0	525	0	525	0	525	0	525	0	525	1.5324	525	0	0
0	525	0	525	0	525	0	525	0	525	0	525	0	525	0	525	0	525	0	525	0	525	0	525	0	525	1.5424	525	0	0
0	525	0	525	0	525	0	525	0	525	0	525	0	525	0	525	0	525	0	525	0	525	0	525	0	525	1.5525	525	0	0
0	525	0	525	0	525	0	525	0	525	0	525	0	525	0	525	0	525	0	525	0	525	0	525	0	525	1.5625	525	0	0
0	525	0	525	0	525	0	525	0	525	0	525	0	525	0	525	0	525	0	525	0	525	0	525	0	525	1.5725	525	0	0
0	525	0	525	0	525	0	525	0	525	0	525	0	525	0	525	0	525	0	525	0	525	0	525	0	525	1.5825	525	0	0
0	525	0	525	0	525	0	525	0	525	0	525	0	525	0	525	0	525	0	525	0	525	0	525	0	525	1.5925	525	0	0
0	525	0	525	0	525	0	525	0	525	0	525	0	525	0	525	0	525	0	525	0	525	0	525	0	525	1.6025	525	0	0
0	525	0	525	0	525	0	525	0	525	0	525	0	525	0	525	0	525	0	525	0	525	0	525	0	525	1.6126	525	0	0
0	525	0	525	0	525	0	525	0	525	0	525	0	525	0	525	0	525	0	525	0	525	0	525	0	525	1.6226	525	0	0
0	525	0	525	0	525	0	525	0	525	0	525	0	525	0	525	0	525	0	525	0	525	0	525	0	525	1.6326	525	0	0
0	525	0	525	0	525	0	525	0	525	0	525	0	525	0	525	0	525	0	525	0	525	0	525	0	525	1.6426	525	0	0
0	525	0	525	0	525	0	525	0	525	0	525	0	525	0	525	0	525	0	525	0	525	0	525	0	525	1.6526	525	0	0
0	525	0	525	0	525	0	525	0	525	0	525	0	525	0	525	0	525	0	525	0	525	0	525	0	525	1.6626	525	0	0
0	525	0	525	0	525	0	525	0	525	0	525	0	525	0	525	0	525	0	525	0	525	0	525	0	525	1.6726	525	0	0
0	525	0	525	0	525	0	525	0	525	0	525	0	525	0	525	0	525	0	525	0	525	0	525	0	525	1.6827	525	0	0
0	525	0	525	0	525	0	525	0	525	0	525	0	525	0	525	0	525	0	525	0	525	0	525	0	525	1.6927	525	0	0
0	525	0	525	0	525	0	525	0	525	0	525	0	525	0	525	0	525	0	525	0	525	0	525	0	525	1.7027	525	0	0
0	525	0	525	0	525	0	525	0	525	0	525	0	525	0	525	0	525	0	525	0	525	0	525	0	525	1.7127	525	0	0
0	525	0	525	0	525	0	525	0	525	0	525	0	525	0	525	0	525	0	525	0	525	0	525	0	525	1.7227	525	0	0
0	525	0	525	0	525	0	525	0	525	0	525	0	525	0	525	0	525	0	525	0	525	0	525	0	525	1.7327	525	0	0
0	525	0	525	0	525	0	525	0	525	0	525	0	525	0	525	0	525	0	525	0	525	0	525	0	525	1.7428	525	0	0
0	525	0	525	0	525	0	525	0	525	0	525	0	525	0	525	0	525	0	525	0	525	0	525	0	525	1.7528	525	0	0
0	525	0	525	0	525	0	525	0	525	0	525	0	525	0	525	0	525	0	525	0	525	0	525	0	525	1.7628	525	0	0
0	525	0	525	0	525	0	525	0	525	0	525	0	525	0	525	0	525	0	525	0	525	0	525	0	525	1.7728	525	0	0
0	525	0	525	0	525	0	525	0	525	0	525	0	525	0	525	0	525	0	525	0	525	0	525	0	525	1.7828	525	0	0
0	525	0	525	0	525	0	525	0	525	0	525	0	525	0	525	0	525	0	525	0	525	0	525	0	525	1.7928	525	0	0
0	525	0	525	0	525	0	525	0	525	0	525	0	525	0	525	0	525	0	525	0	525	0	525	0	525	1.8029	525	0	0
0	525	0	525	0	525	0	525	0	525	0	525	0	525	0	525	0	525	0	525	0	525	0	525	0	525	1.8129	525	0	0
0	525	0	525	0	525	0	525	0	525	0	525	0	525	0	525	0	525	0	525	0	525	0	525	0	525	1.8229	525	0	0
0	525	0	525	0	525	0	525	0	525	0	525	0	525	0	525	0	525	0	525	0	525	0	525	0	525	1.8329	525	0	0
0	525	0	525	0	525	0	525	0	525	0	525	0	525	0	525	0	525	0	525	0	525	0	525	0	525	1.8429	525	0	0
0	525	0	525	0	525	0	525	0	525	0	525	0	525	0	525	0	525	0	525	0	525	0	525	0	525	1.8529	525	0	0
0	525	0	525	0	525	0	525	0	525	0	525	0	525	0	525	0	525	0	525	0	525	0	525	0	525	1.8629	525	0	0
0	525	0	525	0	525	0	525	0	525	0	525	0	525	0	525	0	525	0	525	0	525	0	525	0	525	1.873	525	0	0
0	525	0	525	0	525	0	525	0	525	0	525	0	525	0	525	0	525	0	525	0	525	0	525	0	525	1.883	525	0	0
0	525	0	525	0	525	0	525	0	525	0	525	0	525	0	525	0	525	0	525	0	525	0	525	0	525	1.893	525	0	0
0	525	0	525	0	525	0	525	0	525	0	525	0	525	0	525	0	525	0	525	0	525	0	525	0	525	1.903	525	0	0
0	525	0	525	0	525	0	525	0	525	0	525	0	525	0	525	0	525	0	525	0	525	0	525	0	525	1.913	525	0	0
0	525	0	525	0	525	0	525	0	525	0	525	0	525	0	525	0	525	0	525	0	525	0	525	0	525	1.923	525	0	0
0	525	0	525	0	525	0	525	0	525	0	525	0	525	0	525	0	525	0	525	0	525	0	525	0	525	1.9331	525	0	0
0	525	0	525	0	525	0	525	0	525	0	525	0	525	0	525	0	525	0	525	0	525	0	525	0	525	1.9431	525	0	0
0	525	0	525	0	525	0	525	0	525	0	525	0	525	0	525	0	525	0	525	0	525	0	525	0	525	1.9531	525	0	0
0	525	0	525	0	525	0	525	0	525	0	525	0	525	0	525	0	525	0	525	0	525	0	525	0	525	1.9631	525	0	0
0	525	0	525	0	525	0	525	0	525	0	525	0	525	0	525	0	525	0	525	0	525	0	525	0	525	1.9731	525	0	0
0	525	0	525	0	525	0	525	0	525	0	525	0	525	0	525	0	525	0	525	0	525	0	525	0	525	1.9831	525	0	0
0	525	0	525	0	525	0	525	0	525	0	525	0	525	0	525	0	525	0	525	0	525	0	525	0	525	1.9932	525	0	0
0	525	0	525	0	525	0	525	0	525	0	525	0	525	0	525	0	525	0	525	0	525	0	525	0	525	2.0032	525	0	0
0	525	0	525	0	525	0	525	0	525	0	525	0	525	0	525	0	525	0	525	0	525	0	525	0	525	2.0132	525	0	0
0	525	0	525	0	525	0	525	0	525	0	525	0	525	0	525	0	525	0	525	0	525	0	525	0	525	2.0232	525	0	0
0	525	0	525	0	525	0	525	0	525	0	525	0	525	0	525	0	525	0	525	0	525	0	525	0	525	2.0332	525	0	0
0	525	0	525	0	525	0	525	0	525	0	525	0	525	0	525	0	525	0	525	0	525	0	525	0	525	2.0432	525	0	0
0	525	0	525	0	525	0	525	0	525	0	525	0	525	0	525	0	525	0	525	0	525	0	525	0	525	2.0532	525	0	0
0	525	0	525	0	525	0	525	0	525	0	525	0	525	0	525	0	525	0	525	0	525	0	525	0	525	2.0633	525	0	0
0	525	0	525	0	525	0	525	0	525	0	525	0	525	0	525	0	525	0	525	0	525	0	525	0	525	2.0733	525	0	0
0	525	0	525	0	525	0	525	0	525	0	525	0	525	0	525	0	525	0	525	0	525	0	525	0	525	2.0833	525	0	0
0	525	0	525	0	525	0	525	0	525	0	525	0	525	0	525	0	525	0	525	0	525	0	525	0	525	2.0933	525	0	0
0	525	0	525	0	525	0	525	0	525	0	525	0	525	0	525	0	525	0	525	0	525	0	525	0	525	2.1033	525	0	0
0	525	0	525	0	525	0	525	0	525	0	525	0	525	0	525	0	525	0	525	0	525	0	525	0	525	2.1133	525	0	0
0	525	0	525	0	525	0	525	0	525	0	525	0	525	0	525	0	525	0	525	0	525	0	525	0	525	2.1234	525	0	0
0	525	0	525	0	525	0	525	0	525	0	525	0	525	0	525	0	525	0	525	0	525	0	525	0	525	2.1334	525	0	0
0	525	0	525	0	525	0	525	0	525	0	525	0	525	0	525	0	525	0	525	0	525	0	525	0	525	2.1434	525	0	0
0	525	0	525	0	525	0	525	0	525	0	525	0	525	0	525	0	525	0	525	0	525	0	525	0	525	2.1534	525	0	0
0	525	0	525	0	525	0	525	0	525	0	525	0	525	0	525	0	525	0	525	0	525	0	525	0	525	2.1634	525	0	0
0	525	0	525	0	525	0	525	0	525	0	525	0	525	0	525	0	525	0	525	0	525	0	525	0	525	2.1734	525	0	0
0	525	0	525	0	525	0	525	0	525	0	525	0	525	0	525	0	525	0	525	0	525	0	525	0	525	2.1835	525	0	0
0	525	0	525	0	525	0	525	0	525	0	525	0	525	0	525	0	525	0	525	0	525	0	525	0	525	2.1935	525	0	0
0	525	0	525	0	525	0	525	0	525	0	525	0	525	0	525	0	525	0	525	0	525	0	525	0	525	2.2035	525	0	0
0	525	0	525	0	525	0	525	0	525	0	525	0	525	0	525	0	525	0	525	0	525	0	525	0	525	2.2135	525	0	0
0	525	0	525	0	525	0	525	0	525	0	525	0	525	0	525	0	525	0	525	0	525	0	525	0	525	2.2235	525	0	0
0	525	0	525	0	525	0	525	0	525	0	525	0	525	0	525	0	525	0	525	0	525	0	525	0	525	2.2335	525	0	0
0	525	0	525	0	525	0	525	0	525	0	525	0	525	0	525	0	525	0	525	0	525	0	525	0	525	2.2435	525	0	0
0	525	0	525	0	525	0	525	0	525	0	525	0	525	0	525	0	525	0	525	0	525	0	525	0	525	2.2536	525	0	0
0	525	0	525	0	525	0	525	0	525	0	525	0	525	0	525	0	525	0	525	0	525	0	525	0	525	2.2636	525	0	0
0	525	0	525	0	525	0	525	0	525	0	525	0	525	0	525	0	525	0	525	0	525	0	525	0	525	2.2736	525	0	0
0	525	0	525	0	525	0	525	0	525	0	525	0	525	0	525	0	525	0	525	0	525	0	525	0	525	2.2836	525	0	0
0	525	0	525	0	525	0	525	0	525	0	525	0	525	0	525	0	525	0	525	0	525	0	525	0	525	2.2936	525	0	0
0	525	0	525	0	525	0	525	0	525	0	525	0	525	0	525	0	525	0	525	0	525	0	525	0	525	2.3036	525	0	0
0	525	0	525	0	525	0	525	0	525	0	525	0	525	0	525	0	525	0	525	0	525	0	525	0	525	2.3137	525	0	0
0	525	0	525	0	525	0	525	0	525	0	525	0	525	0	525	0	525	0	525	0	525	0	525	0	525	2.3237	525	0	0
0	525	0	525	0	525	0	525	0	525	0	525	0	525	0	525	0	525	0	525	0	525	0	525	0	525	2.3337	525	0	0
0	525	0	525	0	525	0	525	0	525	0	525	0	525	0	525	0	525	0	525	0	525	0	525	0	525	2.3437	525	0	0
0	525	0	525	0	525	0	525	0	525	0	525	0	525	0	525	0	525	0	525	0	525	0	525	0	525	2.3537	525	0	0
0	525	0	525	0	525	0	525	0	525	0	525	0	525	0	525	0	525	0	525	0	525	0	525	0	525	2.3637	525	0	0
0	525	0	525	0	525	0	525	0	525	0	525	0	525	0	525	0	525	0	525	0	525	0	525	0	525	2.3738	525	0	0
0	525	0	525	0	525	0	525	0	525	0	525	0	525	0	525	0	525	0	525	0	525	0	525	0	525	2.3838	525	0	0
0	525	0	525	0	525	0	525	0	525	0	525	0	525	0	525	0	525	0	525	0	525	0	525	0	525	2.3938	525	0	0
0	525	0	525	0	525	0	525	0	525	0	525	0	525	0	525	0	525	0	525	0	525	0	525	0	525	2.4038	525	0	0
0	525	0	525	0	525	0	525	0	525	0	525	0	525	0	525	0	525	0	525	0	525	0	525	0	525	2.4138	525	0	0
0	525	0	525	0	525	0	525	0	525	0	525	0	525	0	525	0	525	0	525	0	525	0	525	0	525	2.4238	525	0	0
0	525	0	525	0	525	0	525	0	525	0	525	0	525	0	525	0	525	0	525	0	525	0	525	0	525	2.4339	525	0	0
0	525	0	525	0	525	0	525	0	525	0	525	0	525	0	525	0	525	0	525	0	525	0	525	0	525	2.4439	525	0	0
0	525	0	525	0	525	0	525	0	525	0	525	0	525	0	525	0	525	0	525	0	525	0	525	0	525	2.4539	525	0	0
0	525	0	525	0	525	0	525	0	525	0	525	0	525	0	525	0	525	0	525	0	525	0	525	0	525	2.4639	525	0	0
0	525	0	525	0	525	0	525	0	525	0	525	0	525	0	525	0	525	0	525	0	525	0	525	0	525	2.4739	525	0	0
0	525	0	525	0	525	0	525	0	525	0	525	0	525	0	525	0	525	0	525	0	525	0	525	0	525	2.4839	525	0	0
0	525	0	525	0	525	0	525	0	525	0	525	0	525	0	525	0	525	0	525	0	525	0	525	0	525	2.4939	525	0	0
0	525	0	525	0	525	0	525	0	525	0	525	0	525	0	525	0	525	0	525	0	525	0	525	0	525	2.504	525	0	0
0	525	0	525	0	525	0	525	0	525	0	525	0	525	0	525	0	525	0	525	0	525	0	525	0	525	2.514	525	0	0
0	525	0	525	0	525	0	525	0	525	0	525	0	525	0	525	0	525	0	525	0	525	0	525	0	525	2.524	525	0	0
0	525	0	525	0	525	0	525	0	525	0	525	0	525	0	525	0	525	0	525	0	525	0	525	0	525	2.534	525	0	0
0	525	0	525	0	525	0	525	0	525	0	525	0	525	0	525	0	525	0	525	0	525	0	525	0	525	2.544	525	0	0
0	525	0	525	0	525	0	525	0	525	0	525	0	525	0	525	0	525	0	525	0	525	0	525	0	525	2.554	525	0	0
0	525	0	525	0	525	0	525	0	525	0	525	0	525	0	525	0	525	0	525	0	525	0	525	0	525	2.5641	525	0	0
0	525	0	525	0	525	0	525	0	525	0	525	0	525	0	525	0	525	0	525	0	525	0	525	0	525	2.5741	525	0	0
0	525	0	525	0	525	0	525	0	525	0	525	0	525	0	525	0	525	0	525	0	525	0	525	0	525	2.5841	525	0	0
0	525	0	525	0	525	0	525	0	525	0	525	0	525	0	525	0	525	0	525	0	525	0	525	0	525	2.5941	525	0	0
0	525	0	525	0	525	0	525	0	525	0	525	0	525	0	525	0	525	0	525	0	525	0	525	0	525	2.6041	525	0	0
0	525	0	525	0	525	0	525	0	525	0	525	0	525	0	525	0	525	0	525	0	525	0	525	0	525	2.6141	525	0	0
0	525	0	525	0	525	0	525	0	525	0	525	0	525	0	525	0	525	0	525	0	525	0	525	0	525	2.6242	525	0	0
0	525	0	525	0	525	0	525	0	525	0	525	0	525	0	525	0	525	0	525	0	525	0	525	0	525	2.6342	525	0	0
0	525	0	525	0	525	0	525	0	525	0	525	0	525	0	525	0	525	0	525	0	525	0	525	0	525	2.6442	525	0	0
0	525	0	525	0	525	0	525	0	525	0	525	0	525	0	525	0	525	0	525	0	525	0	525	0	525	2.6542	525	0	0
0	525	0	525	0	525	0	525	0	525	0	525	0	525	0	525	0	525	0	525	0	525	0	525	0	525	2.6642	525	0	0
0	525	0	525	0	525	0	525	0	525	0	525	0	525	0	525	0	525	0	525	0	525	0	525	0	525	2.6742	525	0	0
0	525	0	525	0	525	0	525	0	525	0	525	0	525	0	525	0	525	0	525	0	525	0	525	0	525	2.6842	525	0	0
0	525	0	525	0	525	0	525	0	525	0	525	0	525	0	525	0	525	0	525	0	525	0	525	0	525	2.6943	525	0	0
0	525	0	525	0	525	0	525	0	525	0	525	0	525	0	525	0	525	0	525	0	525	0	525	0	525	2.7043	525	0	0
0	525	0	525	0	525	0	525	0	525	0	525	0	525	0	525	0	525	0	525	0	525	0	525	0	525	2.7143	525	0	0
0	525	0	525	0	525	0	525	0	525	0	525	0	525	0	525	0	525	0	525	0	525	0	525	0	525	2.7243	525	0	0
0	525	0	525	0	525	0	525	0	525	0	525	0	525	0	525	0	525	0	525	0	525	0	525	0	525	2.7343	525	0	0
0	525	0	525	0	525	0	525	0	525	0	525	0	525	0	525	0	525	0	525	0	525	0	525	0	525	2.7443	525	0	0
0	525	0	525	0	525	0	525	0	525	0	525	0	525	0	525	0	525	0	525	0	525	0	525	0	525	2.7544	525	0	0
0	525	0	525	0	525	0	525	0	525	0	525	0	525	0	525	0	525	0	525	0	525	0	525	0	525	2.7644	525	0	0
0	525	0	525	0	525	0	525	0	525	0	525	0	525	0	525	0	525	0	525	0	525	0	525	0	525	2.7744	525	0	0
0	525	0	525	0	525	0	525	0	525	0	525	0	525	0	525	0	525	0	525	0	525	0	525	0	525	2.7844	525	0	0
0	525	0	525	0	525	0	525	0	525	0	525	0	525	0	525	0	525	0	525	0	525	0	525	0	525	2.7944	525	0	0
0	525	0	525	0	525	0	525	0	525	0	525	0	525	0	525	0	525	0	525	0	525	0	525	0	525	2.8044	525	0	0
0	525	0	525	0	525	0	525	0	525	0	525	0	525	0	525	0	525	0	525	0	525	0	525	0	525	2.8145	525	0	0
0	525	0	525	0	525	0	525	0	525	0	525	0	525	0	525	0	525	0	525	0	525	0	525	0	525	2.8245	525	0	0
0	525	0	525	0	525	0	525	0	525	0	525	0	525	0	525	0	525	0	525	0	525	0	525	0	525	2.8345	525	0	0
0	525	0	525	0	525	0	525	0	525	0	525	0	525	0	525	0	525	0	525	0	525	0	525	0	525	2.8445	525	0	0
0	525	0	525	0	525	0	525	0	525	0	525	0	525	0	525	0	525	0	525	0	525	0	525	0	525	2.8545	525	0	0
0	525	0	525	0	525	0	525	0	525	0	525	0	525	0	525	0	525	0	525	0	525	0	525	0	525	2.8645	525	0	0
0	525	0	525	0	525	0	525	0	525	0	525	0	525	0	525	0	525	0	525	0	525	0	525	0	525	2.8745	525	0	0
0	525	0	525	0	525	0	525	0	525	0	525	0	525	0	525	0	525	0	525	0	525	0	525	0	525	2.8846	525	0	0
0	525	0	525	0	525	0	525	0	525	0	525	0	525	0	525	0	525	0	525	0	525	0	525	0	525	2.8946	525	0	0
0	525	0	525	0	525	0	525	0	525	0	525	0	525	0	525	0	525	0	525	0	525	0	525	0	525	2.9046	525	0	0
0	525	0	525	0	525	0	525	0	525	0	525	0	525	0	525	0	525	0	525	0	525	0	525	0	525	2.9146	525	0	0
0	525	0	525	0	525	0	525	0	525	0	525	0	525	0	525	0	525	0	525	0	525	0	525	0	525	2.9246	525	0	0
0	525	0	525	0	525	0	525	0	525	0	525	0	525	0	525	0	525	0	525	0	525	0	525	0	525	2.9346	525	0	0
0	525	0	525	0	525	0	525	0	525	0	525	0	525	0	525	0	525	0	525	0	525	0	525	0	525	2.9447	525	0	0
0	525	0	525	0	525	0	525	0	525	0	525	0	525	0	525	0	525	0	525	0	525	0	525	0	525	2.9547	525	0	0
0	525	0	525	0	525	0	525	0	525	0	525	0	525	0	525	0	525	0	525	0	525	0	525	0	525	2.9647	525	0	0
0	525	0	525	0	525	0	525	0	525	0	525	0	525	0	525	0	525	0	525	0	525	0	525	0	525	2.9747	525	0	0
0	525	0	525	0	525	0	525	0	525	0	525	0	525	0	525	0	525	0	525	0	525	0	525	0	525	2.9847	525	0	0
0	525	0	525	0	525	0	525	0	525	0	525	0	525	0	525	0	525	0	525	0	525	0	525	0	525	2.9947	525	0	0
0	525	0	525	0	525	0	525	0	525	0	525	0	525	0	525	0	525	0	525	0	525	0	525	0	525	3.0048	525	0	0
0	525	0	525	0	525	0	525	0	525	0	525	0	525	0	525	0	525	0	525	0	525	0	525	0	525	3.0148	525	0	0
0	525	0	525	0	525	0	525	0	525	0	525	0	525	0	525	0	525	0	525	0	525	0	525	0	525	3.0248	525	0	0
0	525	0	525	0	525	0	525	0	525	0	525	0	525	0	525	0	525	0	525	0	525	0	525	0	525	3.0348	525	0	0
0	525	0	525	0	525	0	525	0	525	0	525	0	525	0	525	0	525	0	525	0	525	0	525	0	525	3.0448	525	0	0
0	525	0	525	0	525	0	525	0	525	0	525	0	525	0	525	0	525	0	525	0	525	0	525	0	525	3.0548	525	0	0
0	525	0	525	0	525	0	525	0	525	0	525	0	525	0	525	0	525	0	525	0	525	0	525	0	525	3.0648	525	0	0
0	525	0	525	0	525	0	525	0	525	0	525	0	525	0	525	0	525	0	525	0	525	0	525	0	525	3.0749	525	0	0
0	525	0	525	0	525	0	525	0	525	0	525	0	525	0	525	0	525	0	525	0	525	0	525	0	525	3.0849	525	0	0
0	525	0	525	0	525	0	525	0	525	0	525	0	525	0	525	0	525	0	525	0	525	0	525	0	525	3.0949	525	0	0
0	525	0	525	0	525	0	525	0	525	0	525	0	525	0	525	0	525	0	525	0	525	0	525	0	525	3.1049	525	0	0
0	525	0	525	0	525	0	525	0	525	0	525	0	525	0	525	0	525	0	525	0	525	0	525	0	525	3.1149	525	0	0
0	525	0	525	0	525	0	525	0	525	0	525	0	525	0	525	0	525	0	525	0	525	0	525	0	525	3.1249	525	0	0
0	525	0	525	0	525	0	525	0	525	0	525	0	525	0	525	0	525	0	525	0	525	0	525	0	525	3.135	525	0	0
0	525	0	525	0	525	0	525	0	525	0	525	0	525	0	525	0	525	0	525	0	525	0	525	0	525	3.145	525	0	0
0	525	0	525	0	525	0	525	0	525	0	525	0	525	0	525	0	525	0	525	0	525	0	525	0	525	3.155	525	0	0
0	525	0	525	0	525	0	525	0	525	0	525	0	525	0	525	0	525	0	525	0	525	0	525	0	525	3.165	525	0	0
0	525	0	525	0	525	0	525	0	525	0	525	0	525	0	525	0	525	0	525	0	525	0	525	0	525	3.175	525	0	0
0	525	0	525	0	525	0	525	0	525	0	525	0	525	0	525	0	525	0	525	0	525	0	525	0	525	3.185	525	0	0
0	525	0	525	0	525	0	525	0	525	0	525	0	525	0	525	0	525	0	525	0	525	0	525	0	525	3.1951	525	0	0
0	525	0	525	0	525	0	525	0	525	0	525	0	525	0	525	0	525	0	525	0	525	0	525	0	525	3.2051	525	0	0
0	525	0	525	0	525	0	525	0	525	0	525	0	525	0	525	0	525	0	525	0	525	0	525	0	525	3.2151	525	0	0
0	525	0	525	0	525	0	525	0	525	0	525	0	525	0	525	0	525	0	525	0	525	0	525	0	525	3.2251	525	0	0
0	525	0	525	0	525	0	525	0	525	0	525	0	525	0	525	0	525	0	525	0	525	0	525	0	525	3.2351	525	0	0
0	525	0	525	0	525	0	525	0	525	0	525	0	525	0	525	0	525	0	525	0	525	0	525	0	525	3.2451	525	0	0
0	525	0	525	0	525	0	525	0	525	0	525	0	525	0	525	0	525	0	525	0	525	0	525	0	525	3.2551	525	0	0
0	525	0	525	0	525	0	525	0	525	0	525	0	525	0	525	0	525	0	525	0	525	0	525	0	525	3.2652	525	0	0
0	525	0	525	0	525	0	525	0	525	0	525	0	525	0	525	0	525	0	525	0	525	0	525	0	525	3.2752	525	0	0
0	525	0	525	0	525	0	525	0	525	0	525	0	525	0	525	0	525	0	525	0	525	0	525	0	525	3.2852	525	0	0
0	525	0	525	0	525	0	525	0	525	0	525	0	525	0	525	0	525	0	525	0	525	0	525	0	525	3.2952	525	0	0
0	525	0	525	0	525	0	525	0	525	0	525	0	525	0	525	0	525	0	525	0	525	0	525	0	525	3.3052	525	0	0
0	525	0	525	0	525	0	525	0	525	0	525	0	525	0	525	0	525	0	525	0	525	0	525	0	525	3.3152	525	0	0
0	525	0	525	0	525	0	525	0	525	0	525	0	525	0	525	0	525	0	525	0	525	0	525	0	525	3.3253	525	0	0
0	525	0	525	0	525	0	525	0	525	0	525	0	525	0	525	0	525	0	525	0	525	0	525	0	525	3.3353	525	0	0
0	525	0	525	0	525	0	525	0	525	0	525	0	525	0	525	0	525	0	525	0	525	0	525	0	525	3.3453	525	0	0
0	525	0	525	0	525	0	525	0	525	0	525	0	525	0	525	0	525	0	525	0	525	0	525	0	525	3.3553	525	0	0
0	525	0	525	0	525	0	525	0	525	0	525	0	525	0	525	0	525	0	525	0	525	0	525	0	525	3.3653	525	0	0
0	525	0	525	0	525	0	525	0	525	0	525	0	525	0	525	0	525	0	525	0	525	0	525	0	525	3.3753	525	0	0
0	525	0	525	0	525	0	525	0	525	0	525	0	525	0	525	0	525	0	525	0	525	0	525	0	525	3.3854	525	0	0
0	525	0	525	0	525	0	525	0	525	0	525	0	525	0	525	0	525	0	525	0	525	0	525	0	525	3.3954	525	0	0
0	525	0	525	0	525	0	525	0	525	0	525	0	525	0	525	0	525	0	525	0	525	0	525	0	525	3.4054	525	0	0
0	525	0	525	0	525	0	525	0	525	0	525	0	525	0	525	0	525	0	525	0	525	0	525	0	525	3.4154	525	0	0
0	525	0	525	0	525	0	525	0	525	0	525	0	525	0	525	0	525	0	525	0	525	0	525	0	525	3.4254	525	0	0
0	525	0	525	0	525	0	525	0	525	0	525	0	525	0	525	0	525	0	525	0	525	0	525	0	525	3.4354	525	0	0
0	525	0	525	0	525	0	525	0	525	0	525	0	525	0	525	0	525	0	525	0	525	0	525	0	525	3.4455	525	0	0
0	525	0	525	0	525	0	525	0	525	0	525	0	525	0	525	0	525	0	525	0	525	0	525	0	525	3.4555	525	0	0
0	525	0	525	0	525	0	525	0	525	0	525	0	525	0	525	0	525	0	525	0	525	0	525	0	525	3.4655	525	0	0
0	525	0	525	0	525	0	525	0	525	0	525	0	525	0	525	0	525	0	525	0	525	0	525	0	525	3.4755	525	0	0
0	525	0	525	0	525	0	525	0	525	0	525	0	525	0	525	0	525	0	525	0	525	0	525	0	525	3.4855	525	0	0
0	525	0	525	0	525	0	525	0	525	0	525	0	525	0	525	0	525	0	525	0	525	0	525	0	525	3.4955	525	0	0
0	525	0	525	0	525	0	525	0	525	0	525	0	525	0	525	0	525	0	525	0	525	0	525	0	525	3.5055	525	0	0
0	525	0	525	0	525	0	525	0	525	0	525	0	525	0	525	0	525	0	525	0	525	0	525	0	525	3.5156	525	0	0
0	525	0	525	0	525	0	525	0	525	0	525	0	525	0	525	0	525	0	525	0	525	0	525	0	525	3.5256	525	0	0
0	525	0	525	0	525	0	525	0	525	0	525	0	525	0	525	0	525	0	525	0	525	0	525	0	525	3.5356	525	0	0
0	525	0	525	0	525	0	525	0	525	0	525	0	525	0	525	0	525	0	525	0	525	0	525	0	525	3.5456	525	0	0
0	525	0	525	0	525	0	525	0	525	0	525	0	525	0	525	0	525	0	525	0	525	0	525	0	525	3.5556	525	0	0
0	525	0	525	0	525	0	525	0	525	0	525	0	525	0	525	0	525	0	525	0	525	0	525	0	525	3.5656	525	0	0
0	525	0	525	0	525	0	525	0	525	0	525	0	525	0	525	0	525	0	525	0	525	0	525	0	525	3.5757	525	0	0
0	525	0	525	0	525	0	525	0	525	0	525	0	525	0	525	0	525	0	525	0	525	0	525	0	525	3.5857	525	0	0
0	525	0	525	0	525	0	525	0	525	0	525	0	525	0	525	0	525	0	525	0	525	0	525	0	525	3.5957	525	0	0
0	525	0	525	0	525	0	525	0	525	0	525	0	525	0	525	0	525	0	525	0	525	0	525	0	525	3.6057	525	0	0
0	525	0	525	0	525	0	525	0	525	0	525	0	525	0	525	0	525	0	525	0	525	0	525	0	525	3.6157	525	0	0
0	525	0	525	0	525	0	525	0	525	0	525	0	525	0	525	0	525	0	525	0	525	0	525	0	525	3.6257	525	0	0
0	525	0	525	0	525	0	525	0	525	0	525	0	525	0	525	0	525	0	525	0	525	0	525	0	525	3.6358	525	0	0
0	525	0	525	0	525	0	525	0	525	0	525	0	525	0	525	0	525	0	525	0	525	0	525	0	525	3.6458	525	0	0
0	525	0	525	0	525	0	525	0	525	0	525	0	525	0	525	0	525	0	525	0	525	0	525	0	525	3.6558	525	0	0
0	525	0	525	0	525	0	525	0	525	0	525	0	525	0	525	0	525	0	525	0	525	0	525	0	525	3.6658	525	0	0
0	525	0	525	0	525	0	525	0	525	0	525	0	525	0	525	0	525	0	525	0	525	0	525	0	525	3.6758	525	0	0
0	525	0	525	0	525	0	525	0	525	0	525	0	525	0	525	0	525	0	525	0	525	0	525	0	525	3.6858	525	0	0
0	525	0	525	0	525	0	525	0	525	0	525	0	525	0	525	0	525	0	525	0	525	0	525	0	525	3.6958	525	0	0
0	525	0	525	0	525	0	525	0	525	0	525	0	525	0	525	0	525	0	525	0	525	0	525	0	525	3.7059	525	0	0
0	525	0	525	0	525	0	525	0	525	0	525	0	525	0	525	0	525	0	525	0	525	0	525	0	525	3.7159	525	0	0
0	525	0	525	0	525	0	525	0	525	0	525	0	525	0	525	0	525	0	525	0	525	0	525	0	525	3.7259	525	0	0
0	525	0	525	0	525	0	525	0	525	0	525	0	525	0	525	0	525	0	525	0	525	0	525	0	525	3.7359	525	0	0
0	525	0	525	0	525	0	525	0	525	0	525	0	525	0	525	0	525	0	525	0	525	0	525	0	525	3.7459	525	0	0
0	525	0	525	0	525	0	525	0	525	0	525	0	525	0	525	0	525	0	525	0	525	0	525	0	525	3.7559	525	0	0
0	525	0	525	0	525	0	525	0	525	0	525	0	525	0	525	0	525	0	525	0	525	0	525	0	525	3.766	525	0	0
0	525	0	525	0	525	0	525	0	525	0	525	0	525	0	525	0	525	0	525	0	525	0	525	0	525	3.776	525	0	0
0	525	0	525	0	525	0	525	0	525	0	525	0	525	0	525	0	525	0	525	0	525	0	525	0	525	3.786	525	0	0
0	525	0	525	0	525	0	525	0	525	0	525	0	525	0	525	0	525	0	525	0	525	0	525	0	525	3.796	525	0	0
0	525	0	525	0	525	0	525	0	525	0	525	0	525	0	525	0	525	0	525	0	525	0	525	0	525	3.806	525	0	0
0	525	0	525	0	525	0	525	0	525	0	525	0	525	0	525	0	525	0	525	0	525	0	525	0	525	3.816	525	0	0
0	525	0	525	0	525	0	525	0	525	0	525	0	525	0	525	0	525	0	525	0	525	0	525	0	525	3.8261	525	0	0
0	525	0	525	0	525	0	525	0	525	0	525	0	525	0	525	0	525	0	525	0	525	0	525	0	525	3.8361	525	0	0
0	525	0	525	0	525	0	525	0	525	0	525	0	525	0	525	0	525	0	525	0	525	0	525	0	525	3.8461	525	0	0
0	525	0	525	0	525	0	525	0	525	0	525	0	525	0	525	0	525	0	525	0	525	0	525	0	525	3.8561	525	0	0
0	525	0	525	0	525	0	525	0	525	0	525	0	525	0	525	0	525	0	525	0	525	0	525	0	525	3.8661	525	0	0
0	525	0	525	0	525	0	525	0	525	0	525	0	525	0	525	0	525	0	525	0	525	0	525	0	525	3.8761	525	0	0
0	525	0	525	0	525	0	525	0	525	0	525	0	525	0	525	0	525	0	525	0	525	0	525	0	525	3.8861	525	0	0
0	525	0	525	0	525	0	525	0	525	0	525	0	525	0	525	0	525	0	525	0	525	0	525	0	525	3.8962	525	0	0
0	525	0	525	0	525	0	525	0	525	0	525	0	525	0	525	0	525	0	525	0	525	0	525	0	525	3.9062	525	0	0
0	525	0	525	0	525	0	525	0	525	0	525	0	525	0	525	0	525	0	525	0	525	0	525	0	525	3.9162	525	0	0
0	525	0	525	0	525	0	525	0	525	0	525	0	525	0	525	0	525	0	525	0	525	0	525	0	525	3.9262	525	0	0
0	525	0	525	0	525	0	525	0	525	0	525	0	525	0	525	0	525	0	525	0	525	0	525	0	525	3.9362	525	0	0
0	525	0	525	0	525	0	525	0	525	0	525	0	525	0	525	0	525	0	525	0	525	0	525	0	525	3.9462	525	0	0
0	525	0	525	0	525	0	525	0	525	0	525	0	525	0	525	0	525	0	525	0	525	0	525	0	525	3.9563	525	0	0
0	525	0	525	0	525	0	525	0	525	0	525	0	525	0	525	0	525	0	525	0	525	0	525	0	525	3.9663	525	0	0
0	525	0	525	0	525	0	525	0	525	0	525	0	525	0	525	0	525	0	525	0	525	0	525	0	525	3.9763	525	0	0
0	525	0	525	0	525	0	525	0	525	0	525	0	525	0	525	0	525	0	525	0	525	0	525	0	525	3.9863	525	0	0
0	525	0	525	0	525	0	525	0	525	0	525	0	525	0	525	0	525	0	525	0	525	0	525	0	525	3.9963	525	0	0
0	525	0	525	0	525	0	525	0	525	0	525	0	525	0	525	0	525	0	525	0	525	0	525	0	525	4.0063	525	0	0
0	525	0	525	0	525	0	525	0	525	0	525	0	525	0	525	0	525	0	525	0	525	0	525	0	525	4.0164	525	0	0
0	525	0	525	0	525	0	525	0	525	0	525	0	525	0	525	0	525	0	525	0	525	0	525	0	525	4.0264	525	0	0
0	525	0	525	0	525	0	525	0	525	0	525	0	525	0	525	0	525	0	525	0	525	0	525	0	525	4.0364	525	0	0
0	525	0	525	0	525	0	525	0	525	0	525	0	525	0	525	0	525	0	525	0	525	0	525	0	525	4.0464	525	0	0
0	525	0	525	0	525	0	525	0	525	0	525	0	525	0	525	0	525	0	525	0	525	0	525	0	525	4.0564	525	0	0
0	525	0	525	0	525	0	525	0	525	0	525	0	525	0	525	0	525	0	525	0	525	0	525	0	525	4.0664	525	0	0
0	525	0	525	0	525	0	525	0	525	0	525	0	525	0	525	0	525	0	525	0	525	0	525	0	525	4.0764	525	0	0
0	525	0	525	0	525	0	525	0	525	0	525	0	525	0	525	0	525	0	525	0	525	0	525	0	525	4.0865	525	0	0
0	525	0	525	0	525	0	525	0	525	0	525	0	525	0	525	0	525	0	525	0	525	0	525	0	525	4.0965	525	0	0
0	525	0	525	0	525	0	525	0	525	0	525	0	525	0	525	0	525	0	525	0	525	0	525	0	525	4.1065	525	0	0
0	525	0	525	0	525	0	525	0	525	0	525	0	525	0	525	0	525	0	525	0	525	0	525	0	525	4.1165	525	0	0
0	525	0	525	0	525	0	525	0	525	0	525	0	525	0	525	0	525	0	525	0	525	0	525	0	525	4.1265	525	0	0
0	525	0	525	0	525	0	525	0	525	0	525	0	525	0	525	0	525	0	525	0	525	0	525	0	525	4.1365	525	0	0
0	525	0	525	0	525	0	525	0	525	0	525	0	525	0	525	0	525	0	525	0	525	0	525	0	525	4.1466	525	0	0
0	525	0	525	0	525	0	525	0	525	0	525	0	525	0	525	0	525	0	525	0	525	0	525	0	525	4.1566	525	0	0
0	525	0	525	0	525	0	525	0	525	0	525	0	525	0	525	0	525	0	525	0	525	0	525	0	525	4.1666	525	0	0
0	525	0	525	0	525	0	525	0	525	0	525	0	525	0	525	0	525	0	525	0	525	0	525	0	525	4.1766	525	0	0
0	525	0	525	0	525	0	525	0	525	0	525	0	525	0	525	0	525	0	525	0	525	0	525	0	525	4.1866	525	0	0
0	525	0	525	0	525	0	525	0	525	0	525	0	525	0	525	0	525	0	525	0	525	0	525	0	525	4.1966	525	0	0
0	525	0	525	0	525	0	525	0	525	0	525	0	525	0	525	0	525	0	525	0	525	0	525	0	525	4.2067	525	0	0
0	525	0	525	0	525	0	525	0	525	0	525	0	525	0	525	0	525	0	525	0	525	0	525	0	525	4.2167	525	0	0
0	525	0	525	0	525	0	525	0	525	0	525	0	525	0	525	0	525	0	525	0	525	0	525	0	525	4.2267	525	0	0
0	525	0	525	0	525	0	525	0	525	0	525	0	525	0	525	0	525	0	525	0	525	0	525	0	525	4.2367	525	0	0
0	525	0	525	0	525	0	525	0	525	0	525	0	525	0	525	0	525	0	525	0	525	0	525	0	525	4.2467	525	0	0
0	525	0	525	0	525	0	525	0	525	0	525	0	525	0	525	0	525	0	525	0	525	0	525	0	525	4.2567	525	0	0
0	525	0	525	0	525	0	525	0	525	0	525	0	525	0	525	0	525	0	525	0	525	0	525	0	525	4.2668	525	0	0
0	525	0	525	0	525	0	525	0	525	0	525	0	525	0	525	0	525	0	525	0	525	0	525	0	525	4.2768	525	0	0
0	525	0	525	0	525	0	525	0	525	0	525	0	525	0	525	0	525	0	525	0	525	0	525	0	525	4.2868	525	0	0
0	525	0	525	0	525	0	525	0	525	0	525	0	525	0	525	0	525	0	525	0	525	0	525	0	525	4.2968	525	0	0
0	525	0	525	0	525	0	525	0	525	0	525	0	525	0	525	0	525	0	525	0	525	0	525	0	525	4.3068	525	0	0
0	525	0	525	0	525	0	525	0	525	0	525	0	525	0	525	0	525	0	525	0	525	0	525	0	525	4.3168	525	0	0
0	525	0	525	0	525	0	525	0	525	0	525	0	525	0	525	0	525	0	525	0	525	0	525	0	525	4.3268	525	0	0
0	525	0	525	0	525	0	525	0	525	0	525	0	525	0	525	0	525	0	525	0	525	0	525	0	525	4.3369	525	0	0
0	525	0	525	0	525	0	525	0	525	0	525	0	525	0	525	0	525	0	525	0	525	0	525	0	525	4.3469	525	0	0
0	525	0	525	0	525	0	525	0	525	0	525	0	525	0	525	0	525	0	525	0	525	0	525	0	525	4.3569	525	0	0
0	525	0	525	0	525	0	525	0	525	0	525	0	525	0	525	0	525	0	525	0	525	0	525	0	525	4.3669	525	0	0
0	525	0	525	0	525	0	525	0	525	0	525	0	525	0	525	0	525	0	525	0	525	0	525	0	525	4.3769	525	0	0
0	525	0	525	0	525	0	525	0	525	0	525	0	525	0	525	0	525	0	525	0	525	0	525	0	525	4.3869	525	0	0
0	525	0	525	0	525	0	525	0	525	0	525	0	525	0	525	0	525	0	525	0	525	0	525	0	525	4.397	525	0	0
0	525	0	525	0	525	0	525	0	525	0	525	0	525	0	525	0	525	0	525	0	525	0	525	0	525	4.407	525	0	0
0	525	0	525	0	525	0	525	0	525	0	525	0	525	0	525	0	525	0	525	0	525	0	525	0	525	4.417	525	0	0
0	525	0	525	0	525	0	525	0	525	0	525	0	525	0	525	0	525	0	525	0	525	0	525	0	525	4.427	525	0	0
0	525	0	525	0	525	0	525	0	525	0	525	0	525	0	525	0	525	0	525	0	525	0	525	0	525	4.437	525	0	0
0	525	0	525	0	525	0	525	0	525	0	525	0	525	0	525	0	525	0	525	0	525	0	525	0	525	4.447	525	0	0
0	525	0	525	0	525	0	525	0	525	0	525	0	525	0	525	0	525	0	525	0	525	0	525	0	525	4.4571	525	0	0
0	525	0	525	0	525	0	525	0	525	0	525	0	525	0	525	0	525	0	525	0	525	0	525	0	525	4.4671	525	0	0
0	525	0	525	0	525	0	525	0	525	0	525	0	525	0	525	0	525	0	525	0	525	0	525	0	525	4.4771	525	0	0
0	525	0	525	0	525	0	525	0	525	0	525	0	525	0	525	0	525	0	525	0	525	0	525	0	525	4.4871	525	0	0
0	525	0	525	0	525	0	525	0	525	0	525	0	525	0	525	0	525	0	525	0	525	0	525	0	525	4.4971	525	0	0
0	525	0	525	0	525	0	525	0	525	0	525	0	525	0	525	0	525	0	525	0	525	0	525	0	525	4.5071	525	0	0
0	525	0	525	0	525	0	525	0	525	0	525	0	525	0	525	0	525	0	525	0	525	0	525	0	525	4.5171	525	0	0
0	525	0	525	0	525	0	525	0	525	0	525	0	525	0	525	0	525	0	525	0	525	0	525	0	525	4.5272	525	0	0
0	525	0	525	0	525	0	525	0	525	0	525	0	525	0	525	0	525	0	525	0	525	0	525	0	525	4.5372	525	0	0
0	525	0	525	0	525	0	525	0	525	0	525	0	525	0	525	0	525	0	525	0	525	0	525	0	525	4.5472	525	0	0
0	525	0	525	0	525	0	525	0	525	0	525	0	525	0	525	0	525	0	525	0	525	0	525	0	525	4.5572	525	0	0
0	525	0	525	0	525	0	525	0	525	0	525	0	525	0	525	0	525	0	525	0	525	0	525	0	525	4.5672	525	0	0
0	525	0	525	0	525	0	525	0	525	0	525	0	525	0	525	0	525	0	525	0	525	0	525	0	525	4.5772	525	0	0
0	525	0	525	0	525	0	525	0	525	0	525	0	525	0	525	0	525	0	525	0	525	0	525	0	525	4.5873	525	0	0
0	525	0	525	0	525	0	525	0	525	0	525	0	525	0	525	0	525	0	525	0	525	0	525	0	525	4.5973	525	0	0
0	525	0	525	0	525	0	525	0	525	0	525	0	525	0	525	0	525	0	525	0	525	0	525	0	525	4.6073	525	0	0
0	525	0	525	0	525	0	525	0	525	0	525	0	525	0	525	0	525	0	525	0	525	0	525	0	525	4.6173	525	0	0
0	525	0	525	0	525	0	525	0	525	0	525	0	525	0	525	0	525	0	525	0	525	0	525	0	525	4.6273	525	0	0
0	525	0	525	0	525	0	525	0	525	0	525	0	525	0	525	0	525	0	525	0	525	0	525	0	525	4.6373	525	0	0
0	525	0	525	0	525	0	525	0	525	0	525	0	525	0	525	0	525	0	525	0	525	0	525	0	525	4.6474	525	0	0
0	525	0	525	0	525	0	525	0	525	0	525	0	525	0	525	0	525	0	525	0	525	0	525	0	525	4.6574	525	0	0
0	525	0	525	0	525	0	525	0	525	0	525	0	525	0	525	0	525	0	525	0	525	0	525	0	525	4.6674	525	0	0
0	525	0	525	0	525	0	525	0	525	0	525	0	525	0	525	0	525	0	525	0	525	0	525	0	525	4.6774	525	0	0
0	525	0	525	0	525	0	525	0	525	0	525	0	525	0	525	0	525	0	525	0	525	0	525	0	525	4.6874	525	0	0
0	525	0	525	0	525	0	525	0	525	0	525	0	525	0	525	0	525	0	525	0	525	0	525	0	525	4.6974	525	0	0
0	525	0	525	0	525	0	525	0	525	0	525	0	525	0	525	0	525	0	525	0	525	0	525	0	525	4.7074	525	0	0
0	525	0	525	0	525	0	525	0	525	0	525	0	525	0	525	0	525	0	525	0	525	0	525	0	525	4.7175	525	0	0
0	525	0	525	0	525	0	525	0	525	0	525	0	525	0	525	0	525	0	525	0	525	0	525	0	525	4.7275	525	0	0
0	525	0	525	0	525	0	525	0	525	0	525	0	525	0	525	0	525	0	525	0	525	0	525	0	525	4.7375	525	0	0
0	525	0	525	0	525	0	525	0	525	0	525	0	525	0	525	0	525	0	525	0	525	0	525	0	525	4.7475	525	0	0
0	525	0	525	0	525	0	525	0	525	0	525	0	525	0	525	0	525	0	525	0	525	0	525	0	525	4.7575	525	0	0
0	525	0	525	0	525	0	525	0	525	0	525	0	525	0	525	0	525	0	525	0	525	0	525	0	525	4.7675	525	0	0
0	525	0	525	0	525	0	525	0	525	0	525	0	525	0	525	0	525	0	525	0	525	0	525	0	525	4.7776	525	0	0
0	525	0	525	0	525	0	525	0	525	0	525	0	525	0	525	0	525	0	525	0	525	0	525	0	525	4.7876	525	0	0
0	525	0	525	0	525	0	525	0	525	0	525	0	525	0	525	0	525	0	525	0	525	0	525	0	525	4.7976	525	0	0
0	525	0	525	0	525	0	525	0	525	0	525	0	525	0	525	0	525	0	525	0	525	0	525	0	525	4.8076	525	0	0
0	525	0	525	0	525	0	525	0	525	0	525	0	525	0	525	0	525	0	525	0	525	0	525	0	525	4.8176	525	0	0
0	525	0	525	0	525	0	525	0	525	0	525	0	525	0	525	0	525	0	525	0	525	0	525	0	525	4.8276	525	0	0
0	525	0	525	0	525	0	525	0	525	0	525	0	525	0	525	0	525	0	525	0	525	0	525	0	525	4.8377	525	0	0
0	525	0	525	0	525	0	525	0	525	0	525	0	525	0	525	0	525	0	525	0	525	0	525	0	525	4.8477	525	0	0
0	525	0	525	0	525	0	525	0	525	0	525	0	525	0	525	0	525	0	525	0	525	0	525	0	525	4.8577	525	0	0
0	525	0	525	0	525	0	525	0	525	0	525	0	525	0	525	0	525	0	525	0	525	0	525	0	525	4.8677	525	0	0
0	525	0	525	0	525	0	525	0	525	0	525	0	525	0	525	0	525	0	525	0	525	0	525	0	525	4.8777	525	0	0
0	525	0	525	0	525	0	525	0	525	0	525	0	525	0	525	0	525	0	525	0	525	0	525	0	525	4.8877	525	0	0
0	525	0	525	0	525	0	525	0	525	0	525	0	525	0	525	0	525	0	525	0	525	0	525	0	525	4.8977	525	0	0
0	525	0	525	0	525	0	525	0	525	0	525	0	525	0	525	0	525	0	525	0	525	0	525	0	525	4.9078	525	0	0
0	525	0	525	0	525	0	525	0	525	0	525	0	525	0	525	0	525	0	525	0	525	0	525	0	525	4.9178	525	0	0
0	525	0	525	0	525	0	525	0	525	0	525	0	525	0	525	0	525	0	525	0	525	0	525	0	525	4.9278	525	0	0
0	525	0	525	0	525	0	525	0	525	0	525	0	525	0	525	0	525	0	525	0	525	0	525	0	525	4.9378	525	0	0
0	525	0	525	0	525	0	525	0	525	0	525	0	525	0	525	0	525	0	525	0	525	0	525	0	525	4.9478	525	0	0
0	525	0	525	0	525	0	525	0	525	0	525	0	525	0	525	0	525	0	525	0	525	0	525	0	525	4.9578	525	0	0
0	525	0	525	0	525	0	525	0	525	0	525	0	525	0	525	0	525	0	525	0	525	0	525	0	525	4.9679	525	0	0
0	525	0	525	0	525	0	525	0	525	0	525	0	525	0	525	0	525	0	525	0	525	0	525	0	525	4.9779	525	0	0
0	525	0	525	0	525	0	525	0	525	0	525	0	525	0	525	0	525	0	525	0	525	0	525	0	525	4.9879	525	0	0
0	525	0	525	0	525	0	525	0	525	0	525	0	525	0	525	0	525	0	525	0	525	0	525	0	525	4.9979	525	0	0
0	525	0	525	0	525	0	525	0	525	0	525	0	525	0	525	0	525	0	525	0	525	0	525	0	525	5.0079	525	0	0
0	525	0	525	0	525	0	525	0	525	0	525	0	525	0	525	0	525	0	525	0	525	0	525	0	525	5.0179	525	0	0
0	525	0	525	0	525	0	525	0	525	0	525	0	525	0	525	0	525	0	525	0	525	0	525	0	525	5.028	525	0	0
0	525	0	525	0	525	0	525	0	525	0	525	0	525	0	525	0	525	0	525	0	525	0	525	0	525	5.038	525	0	0
0	525	0	525	0	525	0	525	0	525	0	525	0	525	0	525	0	525	0	525	0	525	0	525	0	525	5.048	525	0	0
0	525	0	525	0	525	0	525	0	525	0	525	0	525	0	525	0	525	0	525	0	525	0	525	0	525	5.058	525	0	0
0	525	0	525	0	525	0	525	0	525	0	525	0	525	0	525	0	525	0	525	0	525	0	525	0	525	5.068	525	0	0
0	525	0	525	0	525	0	525	0	525	0	525	0	525	0	525	0	525	0	525	0	525	0	525	0	525	5.078	525	0	0
0	525	0	525	0	525	0	525	0	525	0	525	0	525	0	525	0	525	0	525	0	525	0	525	0	525	5.088	525	0	0
0	525	0	525	0	525	0	525	0	525	0	525	0	525	0	525	0	525	0	525	0	525	0	525	0	525	5.0981	525	0	0
0	525	0	525	0	525	0	525	0	525	0	525	0	525	0	525	0	525	0	525	0	525	0	525	0	525	5.1081	525	0	0
0	525	0	525	0	525	0	525	0	525	0	525	0	525	0	525	0	525	0	525	0	525	0	525	0	525	5.1181	525	0	0
0	525	0	525	0	525	0	525	0	525	0	525	0	525	0	525	0	525	0	525	0	525	0	525	0	525	5.1281	525	0	0
0	525	0	525	0	525	0	525	0	525	0	525	0	525	0	525	0	525	0	525	0	525	0	525	0	525	5.1381	525	0	0
0	525	0	525	0	525	0	525	0	525	0	525	0	525	0	525	0	525	0	525	0	525	0	525	0	525	5.1481	525	0	0
0	525	0	525	0	525	0	525	0	525	0	525	0	525	0	525	0	525	0	525	0	525	0	525	0	525	5.1582	525	0	0
0	525	0	525	0	525	0	525	0	525	0	525	0	525	0	525	0	525	0	525	0	525	0	525	0	525	5.1682	525	0	0
0	525	0	525	0	525	0	525	0	525	0	525	0	525	0	525	0	525	0	525	0	525	0	525	0	525	5.1782	525	0	0
0	525	0	525	0	525	0	525	0	525	0	525	0	525	0	525	0	525	0	525	0	525	0	525	0	525	5.1882	525	0	0
0	525	0	525	0	525	0	525	0	525	0	525	0	525	0	525	0	525	0	525	0	525	0	525	0	525	5.1982	525	0	0
0	525	0	525	0	525	0	525	0	525	0	525	0	525	0	525	0	525	0	525	0	525	0	525	0	525	5.2082	525	0	0
0	525	0	525	0	525	0	525	0	525	0	525	0	525	0	525	0	525	0	525	0	525	0	525	0	525	5.2183	525	0	0
0	525	0	525	0	525	0	525	0	525	0	525	0	525	0	525	0	525	0	525	0	525	0	525	0	525	5.2283	525	0	0
0	525	0	525	0	525	0	525	0	525	0	525	0	525	0	525	0	525	0	525	0	525	0	525	0	525	5.2383	525	0	0
0	525	0	525	0	525	0	525	0	525	0	525	0	525	0	525	0	525	0	525	0	525	0	525	0	525	5.2483	525	0	0
0	525	0	525	0	525	0	525	0	525	0	525	0	525	0	525	0	525	0	525	0	525	0	525	0	525	5.2583	525	0	0
0	525	0	525	0	525	0	525	0	525	0	525	0	525	0	525	0	525	0	525	0	525	0	525	0	525	5.2683	525	0	0
0	525	0	525	0	525	0	525	0	525	0	525	0	525	0	525	0	525	0	525	0	525	0	525	0	525	5.2784	525	0	0
0	525	0	525	0	525	0	525	0	525	0	525	0	525	0	525	0	525	0	525	0	525	0	525	0	525	5.2884	525	0	0
0	525	0	525	0	525	0	525	0	525	0	525	0	525	0	525	0	525	0	525	0	525	0	525	0	525	5.2984	525	0	0
0	525	0	525	0	525	0	525	0	525	0	525	0	525	0	525	0	525	0	525	0	525	0	525	0	525	5.3084	525	0	0
0	525	0	525	0	525	0	525	0	525	0	525	0	525	0	525	0	525	0	525	0	525	0	525	0	525	5.3184	525	0	0
0	525	0	525	0	525	0	525	0	525	0	525	0	525	0	525	0	525	0	525	0	525	0	525	0	525	5.3284	525	0	0
0	525	0	525	0	525	0	525	0	525	0	525	0	525	0	525	0	525	0	525	0	525	0	525	0	525	5.3384	525	0	0
0	525	0	525	0	525	0	525	0	525	0	525	0	525	0	525	0	525	0	525	0	525	0	525	0	525	5.3485	525	0	0
0	525	0	525	0	525	0	525	0	525	0	525	0	525	0	525	0	525	0	525	0	525	0	525	0	525	5.3585	525	0	0
0	525	0	525	0	525	0	525	0	525	0	525	0	525	0	525	0	525	0	525	0	525	0	525	0	525	5.3685	525	0	0
0	525	0	525	0	525	0	525	0	525	0	525	0	525	0	525	0	525	0	525	0	525	0	525	0	525	5.3785	525	0	0
0	525	0	525	0	525	0	525	0	525	0	525	0	525	0	525	0	525	0	525	0	525	0	525	0	525	5.3885	525	0	0
0	525	0	525	0	525	0	525	0	525	0	525	0	525	0	525	0	525	0	525	0	525	0	525	0	525	5.3985	525	0	0
0	525	0	525	0	525	0	525	0	525	0	525	0	525	0	525	0	525	0	525	0	525	0	525	0	525	5.4086	525	0	0
0	525	0	525	0	525	0	525	0	525	0	525	0	525	0	525	0	525	0	525	0	525	0	525	0	525	5.4186	525	0	0
0	525	0	525	0	525	0	525	0	525	0	525	0	525	0	525	0	525	0	525	0	525	0	525	0	525	5.4286	525	0	0
0	525	0	525	0	525	0	525	0	525	0	525	0	525	0	525	0	525	0	525	0	525	0	525	0	525	5.4386	525	0	0
0	525	0	525	0	525	0	525	0	525	0	525	0	525	0	525	0	525	0	525	0	525	0	525	0	525	5.4486	525	0	0
0	525	0	525	0	525	0	525	0	525	0	525	0	525	0	525	0	525	0	525	0	525	0	525	0	525	5.4586	525	0	0
0	525	0	525	0	525	0	525	0	525	0	525	0	525	0	525	0	525	0	525	0	525	0	525	0	525	5.4687	525	0	0
0	525	0	525	0	525	0	525	0	525	0	525	0	525	0	525	0	525	0	525	0	525	0	525	0	525	5.4787	525	0	0
0	525	0	525	0	525	0	525	0	525	0	525	0	525	0	525	0	525	0	525	0	525	0	525	0	525	5.4887	525	0	0
0	525	0	525	0	525	0	525	0	525	0	525	0	525	0	525	0	525	0	525	0	525	0	525	0	525	5.4987	525	0	0
0	525	0	525	0	525	0	525	0	525	0	525	0	525	0	525	0	525	0	525	0	525	0	525	0	525	5.5087	525	0	0
0	525	0	525	0	525	0	525	0	525	0	525	0	525	0	525	0	525	0	525	0	525	0	525	0	525	5.5187	525	0	0
0	525	0	525	0	525	0	525	0	525	0	525	0	525	0	525	0	525	0	525	0	525	0	525	0	525	5.5287	525	0	0
0	525	0	525	0	525	0	525	0	525	0	525	0	525	0	525	0	525	0	525	0	525	0	525	0	525	5.5388	525	0	0
0	525	0	525	0	525	0	525	0	525	0	525	0	525	0	525	0	525	0	525	0	525	0	525	0	525	5.5488	525	0	0
0	525	0	525	0	525	0	525	0	525	0	525	0	525	0	525	0	525	0	525	0	525	0	525	0	525	5.5588	525	0	0
0	525	0	525	0	525	0	525	0	525	0	525	0	525	0	525	0	525	0	525	0	525	0	525	0	525	5.5688	525	0	0
0	525	0	525	0	525	0	525	0	525	0	525	0	525	0	525	0	525	0	525	0	525	0	525	0	525	5.5788	525	0	0
0	525	0	525	0	525	0	525	0	525	0	525	0	525	0	525	0	525	0	525	0	525	0	525	0	525	5.5888	525	0	0
0	525	0	525	0	525	0	525	0	525	0	525	0	525	0	525	0	525	0	525	0	525	0	525	0	525	5.5989	525	0	0
0	525	0	525	0	525	0	525	0	525	0	525	0	525	0	525	0	525	0	525	0	525	0	525	0	525	5.6089	525	0	0
0	525	0	525	0	525	0	525	0	525	0	525	0	525	0	525	0	525	0	525	0	525	0	525	0	525	5.6189	525	0	0
0	525	0	525	0	525	0	525	0	525	0	525	0	525	0	525	0	525	0	525	0	525	0	525	0	525	5.6289	525	0	0
0	525	0	525	0	525	0	525	0	525	0	525	0	525	0	525	0	525	0	525	0	525	0	525	0	525	5.6389	525	0	0
0	525	0	525	0	525	0	525	0	525	0	525	0	525	0	525	0	525	0	525	0	525	0	525	0	525	5.6489	525	0	0
0	525	0	525	0	525	0	525	0	525	0	525	0	525	0	525	0	525	0	525	0	525	0	525	0	525	5.659	525	0	0
0	525	0	525	0	525	0	525	0	525	0	525	0	525	0	525	0	525	0	525	0	525	0	525	0	525	5.669	525	0	0
0	525	0	525	0	525	0	525	0	525	0	525	0	525	0	525	0	525	0	525	0	525	0	525	0	525	5.679	525	0	0
0	525	0	525	0	525	0	525	0	525	0	525	0	525	0	525	0	525	0	525	0	525	0	525	0	525	5.689	525	0	0
0	525	0	525	0	525	0	525	0	525	0	525	0	525	0	525	0	525	0	525	0	525	0	525	0	525	5.699	525	0	0
0	525	0	525	0	525	0	525	0	525	0	525	0	525	0	525	0	525	0	525	0	525	0	525	0	525	5.709	525	0	0
0	525	0	525	0	525	0	525	0	525	0	525	0	525	0	525	0	525	0	525	0	525	0	525	0	525	5.719	525	0	0
0	525	0	525	0	525	0	525	0	525	0	525	0	525	0	525	0	525	0	525	0	525	0	525	0	525	5.7291	525	0	0
0	525	0	525	0	525	0	525	0	525	0	525	0	525	0	525	0	525	0	525	0	525	0	525	0	525	5.7391	525	0	0
0	525	0	525	0	525	0	525	0	525	0	525	0	525	0	525	0	525	0	525	0	525	0	525	0	525	5.7491	525	0	0
0	525	0	525	0	525	0	525	0	525	0	525	0	525	0	525	0	525	0	525	0	525	0	525	0	525	5.7591	525	0	0
0	525	0	525	0	525	0	525	0	525	0	525	0	525	0	525	0	525	0	525	0	525	0	525	0	525	5.7691	525	0	0
0	525	0	525	0	525	0	525	0	525	0	525	0	525	0	525	0	525	0	525	0	525	0	525	0	525	5.7791	525	0	0
0	525	0	525	0	525	0	525	0	525	0	525	0	525	0	525	0	525	0	525	0	525	0	525	0	525	5.7892	525	0	0
0	525	0	525	0	525	0	525	0	525	0	525	0	525	0	525	0	525	0	525	0	525	0	525	0	525	5.7992	525	0	0
0	525	0	525	0	525	0	525	0	525	0	525	0	525	0	525	0	525	0	525	0	525	0	525	0	525	5.8092	525	0	0
0	525	0	525	0	525	0	525	0	525	0	525	0	525	0	525	0	525	0	525	0	525	0	525	0	525	5.8192	525	0	0
0	525	0	525	0	525	0	525	0	525	0	525	0	525	0	525	0	525	0	525	0	525	0	525	0	525	5.8292	525	0	0
0	525	0	525	0	525	0	525	0	525	0	525	0	525	0	525	0	525	0	525	0	525	0	525	0	525	5.8392	525	0	0
0	525	0	525	0	525	0	525	0	525	0	525	0	525	0	525	0	525	0	525	0	525	0	525	0	525	5.8493	525	0	0
0	525	0	525	0	525	0	525	0	525	0	525	0	525	0	525	0	525	0	525	0	525	0	525	0	525	5.8593	525	0	0
0	525	0	525	0	525	0	525	0	525	0	525	0	525	0	525	0	525	0	525	0	525	0	525	0	525	5.8693	525	0	0
0	525	0	525	0	525	0	525	0	525	0	525	0	525	0	525	0	525	0	525	0	525	0	525	0	525	5.8793	525	0	0
0	525	0	525	0	525	0	525	0	525	0	525	0	525	0	525	0	525	0	525	0	525	0	525	0	525	5.8893	525	0	0
0	525	0	525	0	525	0	525	0	525	0	525	0	525	0	525	0	525	0	525	0	525	0	525	0	525	5.8993	525	0	0
0	525	0	525	0	525	0	525	0	525	0	525	0	525	0	525	0	525	0	525	0	525	0	525	0	525	5.9093	525	0	0
0	525	0	525	0	525	0	525	0	525	0	525	0	525	0	525	0	525	0	525	0	525	0	525	0	525	5.9194	525	0	0
0	525	0	525	0	525	0	525	0	525	0	525	0	525	0	525	0	525	0	525	0	525	0	525	0	525	5.9294	525	0	0
0	525	0	525	0	525	0	525	0	525	0	525	0	525	0	525	0	525	0	525	0	525	0	525	0	525	5.9394	525	0	0
0	525	0	525	0	525	0	525	0	525	0	525	0	525	0	525	0	525	0	525	0	525	0	525	0	525	5.9494	525	0	0
0	525	0	525	0	525	0	525	0	525	0	525	0	525	0	525	0	525	0	525	0	525	0	525	0	525	5.9594	525	0	0
0	525	0	525	0	525	0	525	0	525	0	525	0	525	0	525	0	525	0	525	0	525	0	525	0	525	5.9694	525	0	0
0	525	0	525	0	525	0	525	0	525	0	525	0	525	0	525	0	525	0	525	0	525	0	525	0	525	5.9795	525	0	0
0	525	0	525	0	525	0	525	0	525	0	525	0	525	0	525	0	525	0	525	0	525	0	525	0	525	5.9895	525	0	0
0	525	0	525	0	525	0	525	0	525	0	525	0	525	0	525	0	525	0	525	0	525	0	525	0	525	5.9995	525	0	0
0	525	0	525	0	525	0	525	0	525	0	525	0	525	0	525	0	525	0	525	0	525	0	525	0	525	6.0095	525	0	0
0	525	0	525	0	525	0	525	0	525	0	525	0	525	0	525	0	525	0	525	0	525	0	525	0	525	6.0195	525	0	0
0	525	0	525	0	525	0	525	0	525	0	525	0	525	0	525	0	525	0	525	0	525	0	525	0	525	6.0295	525	0	0
0	525	0	525	0	525	0	525	0	525	0	525	0	525	0	525	0	525	0	525	0	525	0	525	0	525	6.0396	525	0	0
0	525	0	525	0	525	0	525	0	525	0	525	0	525	0	525	0	525	0	525	0	525	0	525	0	525	6.0496	525	0	0
0	525	0	525	0	525	0	525	0	525	0	525	0	525	0	525	0	525	0	525	0	525	0	525	0	525	6.0596	525	0	0
0	525	0	525	0	525	0	525	0	525	0	525	0	525	0	525	0	525	0	525	0	525	0	525	0	525	6.0696	525	0	0
0	525	0	525	0	525	0	525	0	525	0	525	0	525	0	525	0	525	0	525	0	525	0	525	0	525	6.0796	525	0	0
0	525	0	525	0	525	0	525	0	525	0	525	0	525	0	525	0	525	0	525	0	525	0	525	0	525	6.0896	525	0	0
0	525	0	525	0	525	0	525	0	525	0	525	0	525	0	525	0	525	0	525	0	525	0	525	0	525	6.0997	525	0	0
0	525	0	525	0	525	0	525	0	525	0	525	0	525	0	525	0	525	0	525	0	525	0	525	0	525	6.1097	525	0	0
0	525	0	525	0	525	0	525	0	525	0	525	0	525	0	525	0	525	0	525	0	525	0	525	0	525	6.1197	525	0	0
0	525	0	525	0	525	0	525	0	525	0	525	0	525	0	525	0	525	0	525	0	525	0	525	0	525	6.1297	525	0	0
0	525	0	525	0	525	0	525	0	525	0	525	0	525	0	525	0	525	0	525	0	525	0	525	0	525	6.1397	525	0	0
0	525	0	525	0	525	0	525	0	525	0	525	0	525	0	525	0	525	0	525	0	525	0	525	0	525	6.1497	525	0	0
0	525	0	525	0	525	0	525	0	525	0	525	0	525	0	525	0	525	0	525	0	525	0	525	0	525	6.1597	525	0	0
0	525	0	525	0	525	0	525	0	525	0	525	0	525	0	525	0	525	0	525	0	525	0	525	0	525	6.1698	525	0	0
0	525	0	525	0	525	0	525	0	525	0	525	0	525	0	525	0	525	0	525	0	525	0	525	0	525	6.1798	525	0	0
0	525	0	525	0	525	0	525	0	525	0	525	0	525	0	525	0	525	0	525	0	525	0	525	0	525	6.1898	525	0	0
0	525	0	525	0	525	0	525	0	525	0	525	0	525	0	525	0	525	0	525	0	525	0	525	0	525	6.1998	525	0	0
0	525	0	525	0	525	0	525	0	525	0	525	0	525	0	525	0	525	0	525	0	525	0	525	0	525	6.2098	525	0	0
0	525	0	525	0	525	0	525	0	525	0	525	0	525	0	525	0	525	0	525	0	525	0	525	0	525	6.2198	525	0	0
0	525	0	525	0	525	0	525	0	525	0	525	0	525	0	525	0	525	0	525	0	525	0	525	0	525	6.2299	525	0	0
0	525	0	525	0	525	0	525	0	525	0	525	0	525	0	525	0	525	0	525	0	525	0	525	0	525	6.2399	525	0	0
0	525	0	525	0	525	0	525	0	525	0	525	0	525	0	525	0	525	0	525	0	525	0	525	0	525	6.2499	525	0	0
0	525	0	525	0	525	0	525	0	525	0	525	0	525	0	525	0	525	0	525	0	525	0	525	0	525	6.2599	525	0	0
0	525	0	525	0	525	0	525	0	525	0	525	0	525	0	525	0	525	0	525	0	525	0	525	0	525	6.2699	525	0	0
0	525	0	525	0	525	0	525	0	525	0	525	0	525	0	525	0	525	0	525	0	525	0	525	0	525	6.2799	525	0	0
0	525	0	525	0	525	0	525	0	525	0	525	0	525	0	525	0	525	0	525	0	525	0	525	0	525	6.29	525	0	0
0	525	0	525	0	525	0	525	0	525	0	525	0	525	0	525	0	525	0	525	0	525	0	525	0	525	6.3	525	0	0
0	525	0	525	0	525	0	525	0	525	0	525	0	525	0	525	0	525	0	525	0	525	0	525	0	525	6.31	525	0	0
0	525	0	525	0	525	0	525	0	525	0	525	0	525	0	525	0	525	0	525	0	525	0	525	0	525	6.32	525	0	0
0	525	0	525	0	525	0	525	0	525	0	525	0	525	0	525	0	525	0	525	0	525	0	525	0	525	6.33	525	0	0
0	525	0	525	0	525	0	525	0	525	0	525	0	525	0	525	0	525	0	525	0	525	0	525	0	525	6.34	525	0	0
0	525	0	525	0	525	0	525	0	525	0	525	0	525	0	525	0	525	0	525	0	525	0	525	0	525	6.35	525	0	0
0	525	0	525	0	525	0	525	0	525	0	525	0	525	0	525	0	525	0	525	0	525	0	525	0	525	6.3601	525	0	0
0	525	0	525	0	525	0	525	0	525	0	525	0	525	0	525	0	525	0	525	0	525	0	525	0	525	6.3701	525	0	0
0	525	0	525	0	525	0	525	0	525	0	525	0	525	0	525	0	525	0	525	0	525	0	525	0	525	6.3801	525	0	0
0	525	0	525	0	525	0	525	0	525	0	525	0	525	0	525	0	525	0	525	0	525	0	525	0	525	6.3901	525	0	0
0	525	0	525	0	525	0	525	0	525	0	525	0	525	0	525	0	525	0	525	0	525	0	525	0	525	6.4001	525	0	0
0	525	0	525	0	525	0	525	0	525	0	525	0	525	0	525	0	525	0	525	0	525	0	525	0	525	6.4101	525	0	0
0	525	0	525	0	525	0	525	0	525	0	525	0	525	0	525	0	525	0	525	0	525	0	525	0	525	6.4202	525	0	0
0	525	0	525	0	525	0	525	0	525	0	525	0	525	0	525	0	525	0	525	0	525	0	525	0	525	6.4302	525	0	0
0	525	0	525	0	525	0	525	0	525	0	525	0	525	0	525	0	525	0	525	0	525	0	525	0	525	6.4402	525	0	0
0	525	0	525	0	525	0	525	0	525	0	525	0	525	0	525	0	525	0	525	0	525	0	525	0	525	6.4502	525	0	0
0	525	0	525	0	525	0	525	0	525	0	525	0	525	0	525	0	525	0	525	0	525	0	525	0	525	6.4602	525	0	0
0	525	0	525	0	525	0	525	0	525	0	525	0	525	0	525	0	525	0	525	0	525	0	525	0	525	6.4702	525	0	0
0	525	0	525	0	525	0	525	0	525	0	525	0	525	0	525	0	525	0	525	0	525	0	525	0	525	6.4803	525	0	0
0	525	0	525	0	525	0	525	0	525	0	525	0	525	0	525	0	525	0	525	0	525	0	525	0	525	6.4903	525	0	0
0	525	0	525	0	525	0	525	0	525	0	525	0	525	0	525	0	525	0	525	0	525	0	525	0	525	6.5003	525	0	0
0	525	0	525	0	525	0	525	0	525	0	525	0	525	0	525	0	525	0	525	0	525	0	525	0	525	6.5103	525	0	0
0	525	0	525	0	525	0	525	0	525	0	525	0	525	0	525	0	525	0	525	0	525	0	525	0	525	6.5203	525	0	0
0	525	0	525	0	525	0	525	0	525	0	525	0	525	0	525	0	525	0	525	0	525	0	525	0	525	6.5303	525	0	0
0	525	0	525	0	525	0	525	0	525	0	525	0	525	0	525	0	525	0	525	0	525	0	525	0	525	6.5403	525	0	0
0	525	0	525	0	525	0	525	0	525	0	525	0	525	0	525	0	525	0	525	0	525	0	525	0	525	6.5504	525	0	0
0	525	0	525	0	525	0	525	0	525	0	525	0	525	0	525	0	525	0	525	0	525	0	525	0	525	6.5604	525	0	0
0	525	0	525	0	525	0	525	0	525	0	525	0	525	0	525	0	525	0	525	0	525	0	525	0	525	6.5704	525	0	0
0	525	0	525	0	525	0	525	0	525	0	525	0	525	0	525	0	525	0	525	0	525	0	525	0	525	6.5804	525	0	0
0	525	0	525	0	525	0	525	0	525	0	525	0	525	0	525	0	525	0	525	0	525	0	525	0	525	6.5904	525	0	0
0	525	0	525	0	525	0	525	0	525	0	525	0	525	0	525	0	525	0	525	0	525	0	525	0	525	6.6004	525	0	0
0	525	0	525	0	525	0	525	0	525	0	525	0	525	0	525	0	525	0	525	0	525	0	525	0	525	6.6105	525	0	0
0	525	0	525	0	525	0	525	0	525	0	525	0	525	0	525	0	525	0	525	0	525	0	525	0	525	6.6205	525	0	0
0	525	0	525	0	525	0	525	0	525	0	525	0	525	0	525	0	525	0	525	0	525	0	525	0	525	6.6305	525	0	0
0	525	0	525	0	525	0	525	0	525	0	525	0	525	0	525	0	525	0	525	0	525	0	525	0	525	6.6405	525	0	0
0	525	0	525	0	525	0	525	0	525	0	525	0	525	0	525	0	525	0	525	0	525	0	525	0	525	6.6505	525	0	0
0	525	0	525	0	525	0	525	0	525	0	525	0	525	0	525	0	525	0	525	0	525	0	525	0	525	6.6605	525	0	0
0	525	0	525	0	525	0	525	0	525	0	525	0	525	0	525	0	525	0	525	0	525	0	525	0	525	6.6706	525	0	0
0	525	0	525	0	525	0	525	0	525	0	525	0	525	0	525	0	525	0	525	0	525	0	525	0	525	6.6806	525	0	0
0	525	0	525	0	525	0	525	0	525	0	525	0	525	0	525	0	525	0	525	0	525	0	525	0	525	6.6906	525	0	0
0	525	0	525	0	525	0	525	0	525	0	525	0	525	0	525	0	525	0	525	0	525	0	525	0	525	6.7006	525	0	0
0	525	0	525	0	525	0	525	0	525	0	525	0	525	0	525	0	525	0	525	0	525	0	525	0	525	6.7106	525	0	0
0	525	0	525	0	525	0	525	0	525	0	525	0	525	0	525	0	525	0	525	0	525	0	525	0	525	6.7206	525	0	0
0	525	0	525	0	525	0	525	0	525	0	525	0	525	0	525	0	525	0	525	0	525	0	525	0	525	6.7306	525	0	0
0	525	0	525	0	525	0	525	0	525	0	525	0	525	0	525	0	525	0	525	0	525	0	525	0	525	6.7407	525	0	0
0	525	0	525	0	525	0	525	0	525	0	525	0	525	0	525	0	525	0	525	0	525	0	525	0	525	6.7507	525	0	0
0	525	0	525	0	525	0	525	0	525	0	525	0	525	0	525	0	525	0	525	0	525	0	525	0	525	6.7607	525	0	0
0	525	0	525	0	525	0	525	0	525	0	525	0	525	0	525	0	525	0	525	0	525	0	525	0	525	6.7707	525	0	0
0	525	0	525	0	525	0	525	0	525	0	525	0	525	0	525	0	525	0	525	0	525	0	525	0	525	6.7807	525	0	0
0	525	0	525	0	525	0	525	0	525	0	525	0	525	0	525	0	525	0	525	0	525	0	525	0	525	6.7907	525	0	0
0	525	0	525	0	525	0	525	0	525	0	525	0	525	0	525	0	525	0	525	0	525	0	525	0	525	6.8008	525	0	0
0	525	0	525	0	525	0	525	0	525	0	525	0	525	0	525	0	525	0	525	0	525	0	525	0	525	6.8108	525	0	0
0	525	0	525	0	525	0	525	0	525	0	525	0	525	0	525	0	525	0	525	0	525	0	525	0	525	6.8208	525	0	0
0	525	0	525	0	525	0	525	0	525	0	525	0	525	0	525	0	525	0	525	0	525	0	525	0	525	6.8308	525	0	0
0	525	0	525	0	525	0	525	0	525	0	525	0	525	0	525	0	525	0	525	0	525	0	525	0	525	6.8408	525	0	0
0	525	0	525	0	525	0	525	0	525	0	525	0	525	0	525	0	525	0	525	0	525	0	525	0	525	6.8508	525	0	0
0	525	0	525	0	525	0	525	0	525	0	525	0	525	0	525	0	525	0	525	0	525	0	525	0	525	6.8609	525	0	0
0	525	0	525	0	525	0	525	0	525	0	525	0	525	0	525	0	525	0	525	0	525	0	525	0	525	6.8709	525	0	0
0	525	0	525	0	525	0	525	0	525	0	525	0	525	0	525	0	525	0	525	0	525	0	525	0	525	6.8809	525	0	0
0	525	0	525	0	525	0	525	0	525	0	525	0	525	0	525	0	525	0	525	0	525	0	525	0	525	6.8909	525	0	0
0	525	0	525	0	525	0	525	0	525	0	525	0	525	0	525	0	525	0	525	0	525	0	525	0	525	6.9009	525	0	0
0	525	0	525	0	525	0	525	0	525	0	525	0	525	0	525	0	525	0	525	0	525	0	525	0	525	6.9109	525	0	0
0	525	0	525	0	525	0	525	0	525	0	525	0	525	0	525	0	525	0	525	0	525	0	525	0	525	6.9209	525	0	0
0	525	0	525	0	525	0	525	0	525	0	525	0	525	0	525	0	525	0	525	0	525	0	525	0	525	6.931	525	0	0
0	525	0	525	0	525	0	525	0	525	0	525	0	525	0	525	0	525	0	525	0	525	0	525	0	525	6.941	525	0	0
0	525	0	525	0	525	0	525	0	525	0	525	0	525	0	525	0	525	0	525	0	525	0	525	0	525	6.951	525	0	0
0	525	0	525	0	525	0	525	0	525	0	525	0	525	0	525	0	525	0	525	0	525	0	525	0	525	6.961	525	0	0
0	525	0	525	0	525	0	525	0	525	0	525	0	525	0	525	0	525	0	525	0	525	0	525	0	525	6.971	525	0	0
0	525	0	525	0	525	0	525	0	525	0	525	0	525	0	525	0	525	0	525	0	525	0	525	0	525	6.981	525	0	0
0	525	0	525	0	525	0	525	0	525	0	525	0	525	0	525	0	525	0	525	0	525	0	525	0	525	6.9911	525	0	0
0	525	0	525	0	525	0	525	0	525	0	525	0	525	0	525	0	525	0	525	0	525	0	525	0	525	7.0011	525	0	0
0	525	0	525	0	525	0	525	0	525	0	525	0	525	0	525	0	525	0	525	0	525	0	525	0	525	7.0111	525	0	0
0	525	0	525	0	525	0	525	0	525	0	525	0	525	0	525	0	525	0	525	0	525	0	525	0	525	7.0211	525	0	0
0	525	0	525	0	525	0	525	0	525	0	525	0	525	0	525	0	525	0	525	0	525	0	525	0	525	7.0311	525	0	0
0	525	0	525	0	525	0	525	0	525	0	525	0	525	0	525	0	525	0	525	0	525	0	525	0	525	7.0411	525	0	0
0	525	0	525	0	525	0	525	0	525	0	525	0	525	0	525	0	525	0	525	0	525	0	525	0	525	7.0512	525	0	0
0	525	0	525	0	525	0	525	0	525	0	525	0	525	0	525	0	525	0	525	0	525	0	525	0	525	7.0612	525	0	0
0	525	0	525	0	525	0	525	0	525	0	525	0	525	0	525	0	525	0	525	0	525	0	525	0	525	7.0712	525	0	0
0	525	0	525	0	525	0	525	0	525	0	525	0	525	0	525	0	525	0	525	0	525	0	525	0	525	7.0812	525	0	0
0	525	0	525	0	525	0	525	0	525	0	525	0	525	0	525	0	525	0	525	0	525	0	525	0	525	7.0912	525	0	0
0	525	0	525	0	525	0	525	0	525	0	525	0	525	0	525	0	525	0	525	0	525	0	525	0	525	7.1012	525	0	0
0	525	0	525	0	525	0	525	0	525	0	525	0	525	0	525	0	525	0	525	0	525	0	525	0	525	7.1113	525	0	0
0	525	0	525	0	525	0	525	0	525	0	525	0	525	0	525	0	525	0	525	0	525	0	525	0	525	7.1213	525	0	0
0	525	0	525	0	525	0	525	0	525	0	525	0	525	0	525	0	525	0	525	0	525	0	525	0	525	7.1313	525	0	0
0	525	0	525	0	525	0	525	0	525	0	525	0	525	0	525	0	525	0	525	0	525	0	525	0	525	7.1413	525	0	0
0	525	0	525	0	525	0	525	0	525	0	525	0	525	0	525	0	525	0	525	0	525	0	525	0	525	7.1513	525	0	0
0	525	0	525	0	525	0	525	0	525	0	525	0	525	0	525	0	525	0	525	0	525	0	525	0	525	7.1613	525	0	0
0	525	0	525	0	525	0	525	0	525	0	525	0	525	0	525	0	525	0	525	0	525	0	525	0	525	7.1713	525	0	0
0	525	0	525	0	525	0	525	0	525	0	525	0	525	0	525	0	525	0	525	0	525	0	525	0	525	7.1814	525	0	0
0	525	0	525	0	525	0	525	0	525	0	525	0	525	0	525	0	525	0	525	0	525	0	525	0	525	7.1914	525	0	0
0	525	0	525	0	525	0	525	0	525	0	525	0	525	0	525	0	525	0	525	0	525	0	525	0	525	7.2014	525	0	0
0	525	0	525	0	525	0	525	0	525	0	525	0	525	0	525	0	525	0	525	0	525	0	525	0	525	7.2114	525	0	0
0	525	0	525	0	525	0	525	0	525	0	525	0	525	0	525	0	525	0	525	0	525	0	525	0	525	7.2214	525	0	0
0	525	0	525	0	525	0	525	0	525	0	525	0	525	0	525	0	525	0	525	0	525	0	525	0	525	7.2314	525	0	0
0	525	0	525	0	525	0	525	0	525	0	525	0	525	0	525	0	525	0	525	0	525	0	525	0	525	7.2415	525	0	0
0	525	0	525	0	525	0	525	0	525	0	525	0	525	0	525	0	525	0	525	0	525	0	525	0	525	7.2515	525	0	0
0	525	0	525	0	525	0	525	0	525	0	525	0	525	0	525	0	525	0	525	0	525	0	525	0	525	7.2615	525	0	0
0	525	0	525	0	525	0	525	0	525	0	525	0	525	0	525	0	525	0	525	0	525	0	525	0	525	7.2715	525	0	0
0	525	0	525	0	525	0	525	0	525	0	525	0	525	0	525	0	525	0	525	0	525	0	525	0	525	7.2815	525	0	0
0	525	0	525	0	525	0	525	0	525	0	525	0	525	0	525	0	525	0	525	0	525	0	525	0	525	7.2915	525	0	0
0	525	0	525	0	525	0	525	0	525	0	525	0	525	0	525	0	525	0	525	0	525	0	525	0	525	7.3016	525	0	0
0	525	0	525	0	525	0	525	0	525	0	525	0	525	0	525	0	525	0	525	0	525	0	525	0	525	7.3116	525	0	0
0	525	0	525	0	525	0	525	0	525	0	525	0	525	0	525	0	525	0	525	0	525	0	525	0	525	7.3216	525	0	0
0	525	0	525	0	525	0	525	0	525	0	525	0	525	0	525	0	525	0	525	0	525	0	525	0	525	7.3316	525	0	0
0	525	0	525	0	525	0	525	0	525	0	525	0	525	0	525	0	525	0	525	0	525	0	525	0	525	7.3416	525	0	0
0	525	0	525	0	525	0	525	0	525	0	525	0	525	0	525	0	525	0	525	0	525	0	525	0	525	7.3516	525	0	0
0	525	0	525	0	525	0	525	0	525	0	525	0	525	0	525	0	525	0	525	0	525	0	525	0	525	7.3616	525	0	0
0	525	0	525	0	525	0	525	0	525	0	525	0	525	0	525	0	525	0	525	0	525	0	525	0	525	7.3717	525	0	0
0	525	0	525	0	525	0	525	0	525	0	525	0	525	0	525	0	525	0	525	0	525	0	525	0	525	7.3817	525	0	0
0	525	0	525	0	525	0	525	0	525	0	525	0	525	0	525	0	525	0	525	0	525	0	525	0	525	7.3917	525	0	0
0	525	0	525	0	525	0	525	0	525	0	525	0	525	0	525	0	525	0	525	0	525	0	525	0	525	7.4017	525	0	0
0	525	0	525	0	525	0	525	0	525	0	525	0	525	0	525	0	525	0	525	0	525	0	525	0	525	7.4117	525	0	0
0	525	0	525	0	525	0	525	0	525	0	525	0	525	0	525	0	525	0	525	0	525	0	525	0	525	7.4217	525	0	0
0	525	0	525	0	525	0	525	0	525	0	525	0	525	0	525	0	525	0	525	0	525	0	525	0	525	7.4318	525	0	0
0	525	0	525	0	525	0	525	0	525	0	525	0	525	0	525	0	525	0	525	0	525	0	525	0	525	7.4418	525	0	0
0	525	0	525	0	525	0	525	0	525	0	525	0	525	0	525	0	525	0	525	0	525	0	525	0	525	7.4518	525	0	0
0	525	0	525	0	525	0	525	0	525	0	525	0	525	0	525	0	525	0	525	0	525	0	525	0	525	7.4618	525	0	0
0	525	0	525	0	525	0	525	0	525	0	525	0	525	0	525	0	525	0	525	0	525	0	525	0	525	7.4718	525	0	0
0	525	0	525	0	525	0	525	0	525	0	525	0	525	0	525	0	525	0	525	0	525	0	525	0	525	7.4818	525	0	0
0	525	0	525	0	525	0	525	0	525	0	525	0	525	0	525	0	525	0	525	0	525	0	525	0	525	7.4919	525	0	0
0	525	0	525	0	525	0	525	0	525	0	525	0	525	0	525	0	525	0	525	0	525	0	525	0	525	7.5019	525	0	0
0	525	0	525	0	525	0	525	0	525	0	525	0	525	0	525	0	525	0	525	0	525	0	525	0	525	7.5119	525	0	0
0	525	0	525	0	525	0	525	0	525	0	525	0	525	0	525	0	525	0	525	0	525	0	525	0	525	7.5219	525	0	0
0	525	0	525	0	525	0	525	0	525	0	525	0	525	0	525	0	525	0	525	0	525	0	525	0	525	7.5319	525	0	0
0	525	0	525	0	525	0	525	0	525	0	525	0	525	0	525	0	525	0	525	0	525	0	525	0	525	7.5419	525	0	0
0	525	0	525	0	525	0	525	0	525	0	525	0	525	0	525	0	525	0	525	0	525	0	525	0	525	7.5519	525	0	0
0	525	0	525	0	525	0	525	0	525	0	525	0	525	0	525	0	525	0	525	0	525	0	525	0	525	7.562	525	0	0
0	525	0	525	0	525	0	525	0	525	0	525	0	525	0	525	0	525	0	525	0	525	0	525	0	525	7.572	525	0	0
0	525	0	525	0	525	0	525	0	525	0	525	0	525	0	525	0	525	0	525	0	525	0	525	0	525	7.582	525	0	0
0	525	0	525	0	525	0	525	0	525	0	525	0	525	0	525	0	525	0	525	0	525	0	525	0	525	7.592	525	0	0
0	525	0	525	0	525	0	525	0	525	0	525	0	525	0	525	0	525	0	525	0	525	0	525	0	525	7.602	525	0	0
0	525	0	525	0	525	0	525	0	525	0	525	0	525	0	525	0	525	0	525	0	525	0	525	0	525	7.612	525	0	0
0	525	0	525	0	525	0	525	0	525	0	525	0	525	0	525	0	525	0	525	0	525	0	525	0	525	7.6221	525	0	0
0	525	0	525	0	525	0	525	0	525	0	525	0	525	0	525	0	525	0	525	0	525	0	525	0	525	7.6321	525	0	0
0	525	0	525	0	525	0	525	0	525	0	525	0	525	0	525	0	525	0	525	0	525	0	525	0	525	7.6421	525	0	0
0	525	0	525	0	525	0	525	0	525	0	525	0	525	0	525	0	525	0	525	0	525	0	525	0	525	7.6521	525	0	0
0	525	0	525	0	525	0	525	0	525	0	525	0	525	0	525	0	525	0	525	0	525	0	525	0	525	7.6621	525	0	0
0	525	0	525	0	525	0	525	0	525	0	525	0	525	0	525	0	525	0	525	0	525	0	525	0	525	7.6721	525	0	0
0	525	0	525	0	525	0	525	0	525	0	525	0	525	0	525	0	525	0	525	0	525	0	525	0	525	7.6822	525	0	0
0	525	0	525	0	525	0	525	0	525	0	525	0	525	0	525	0	525	0	525	0	525	0	525	0	525	7.6922	525	0	0
0	525	0	525	0	525	0	525	0	525	0	525	0	525	0	525	0	525	0	525	0	525	0	525	0	525	7.7022	525	0	0
0	525	0	525	0	525	0	525	0	525	0	525	0	525	0	525	0	525	0	525	0	525	0	525	0	525	7.7122	525	0	0
0	525	0	525	0	525	0	525	0	525	0	525	0	525	0	525	0	525	0	525	0	525	0	525	0	525	7.7222	525	0	0
0	525	0	525	0	525	0	525	0	525	0	525	0	525	0	525	0	525	0	525	0	525	0	525	0	525	7.7322	525	0	0
0	525	0	525	0	525	0	525	0	525	0	525	0	525	0	525	0	525	0	525	0	525	0	525	0	525	7.7422	525	0	0
0	525	0	525	0	525	0	525	0	525	0	525	0	525	0	525	0	525	0	525	0	525	0	525	0	525	7.7523	525	0	0
0	525	0	525	0	525	0	525	0	525	0	525	0	525	0	525	0	525	0	525	0	525	0	525	0	525	7.7623	525	0	0
0	525	0	525	0	525	0	525	0	525	0	525	0	525	0	525	0	525	0	525	0	525	0	525	0	525	7.7723	525	0	0
0	525	0	525	0	525	0	525	0	525	0	525	0	525	0	525	0	525	0	525	0	525	0	525	0	525	7.7823	525	0	0
0	525	0	525	0	525	0	525	0	525	0	525	0	525	0	525	0	525	0	525	0	525	0	525	0	525	7.7923	525	0	0
0	525	0	525	0	525	0	525	0	525	0	525	0	525	0	525	0	525	0	525	0	525	0	525	0	525	7.8023	525	0	0
0	525	0	525	0	525	0	525	0	525	0	525	0	525	0	525	0	525	0	525	0	525	0	525	0	525	7.8124	525	0	0
0	525	0	525	0	525	0	525	0	525	0	525	0	525	0	525	0	525	0	525	0	525	0	525	0	525	7.8224	525	0	0
0	525	0	525	0	525	0	525	0	525	0	525	0	525	0	525	0	525	0	525	0	525	0	525	0	525	7.8324	525	0	0
0	525	0	525	0	525	0	525	0	525	0	525	0	525	0	525	0	525	0	525	0	525	0	525	0	525	7.8424	525	0	0
0	525	0	525	0	525	0	525	0	525	0	525	0	525	0	525	0	525	0	525	0	525	0	525	0	525	7.8524	525	0	0
0	525	0	525	0	525	0	525	0	525	0	525	0	525	0	525	0	525	0	525	0	525	0	525	0	525	7.8624	525	0	0
0	525	0	525	0	525	0	525	0	525	0	525	0	525	0	525	0	525	0	525	0	525	0	525	0	525	7.8725	525	0	0
0	525	0	525	0	525	0	525	0	525	0	525	0	525	0	525	0	525	0	525	0	525	0	525	0	525	7.8825	525	0	0
0	525	0	525	0	525	0	525	0	525	0	525	0	525	0	525	0	525	0	525	0	525	0	525	0	525	7.8925	525	0	0
0	525	0	525	0	525	0	525	0	525	0	525	0	525	0	525	0	525	0	525	0	525	0	525	0	525	7.9025	525	0	0
0	525	0	525	0	525	0	525	0	525	0	525	0	525	0	525	0	525	0	525	0	525	0	525	0	525	7.9125	525	0	0
0	525	0	525	0	525	0	525	0	525	0	525	0	525	0	525	0	525	0	525	0	525	0	525	0	525	7.9225	525	0	0
0	525	0	525	0	525	0	525	0	525	0	525	0	525	0	525	0	525	0	525	0	525	0	525	0	525	7.9325	525	0	0
0	525	0	525	0	525	0	525	0	525	0	525	0	525	0	525	0	525	0	525	0	525	0	525	0	525	7.9426	525	0	0
0	525	0	525	0	525	0	525	0	525	0	525	0	525	0	525	0	525	0	525	0	525	0	525	0	525	7.9526	525	0	0
0	525	0	525	0	525	0	525	0	525	0	525	0	525	0	525	0	525	0	525	0	525	0	525	0	525	7.9626	525	0	0
0	525	0	525	0	525	0	525	0	525	0	525	0	525	0	525	0	525	0	525	0	525	0	525	0	525	7.9726	525	0	0
0	525	0	525	0	525	0	525	0	525	0	525	0	525	0	525	0	525	0	525	0	525	0	525	0	525	7.9826	525	0	0
0	525	0	525	0	525	0	525	0	525	0	525	0	525	0	525	0	525	0	525	0	525	0	525	0	525	7.9926	525	0	0
0	525	0	525	0	525	0	525	0	525	0	525	0	525	0	525	0	525	0	525	0	525	0	525	0	525	8.0027	525	0	0
0	525	0	525	0	525	0	525	0	525	0	525	0	525	0	525	0	525	0	525	0	525	0	525	0	525	8.0127	525	0	0
0	525	0	525	0	525	0	525	0	525	0	525	0	525	0	525	0	525	0	525	0	525	0	525	0	525	8.0227	525	0	0
0	525	0	525	0	525	0	525	0	525	0	525	0	525	0	525	0	525	0	525	0	525	0	525	0	525	8.0327	525	0	0
0	525	0	525	0	525	0	525	0	525	0	525	0	525	0	525	0	525	0	525	0	525	0	525	0	525	8.0427	525	0	0
0	525	0	525	0	525	0	525	0	525	0	525	0	525	0	525	0	525	0	525	0	525	0	525	0	525	8.0527	525	0	0
0	525	0	525	0	525	0	525	0	525	0	525	0	525	0	525	0	525	0	525	0	525	0	525	0	525	8.0628	525	0	0
0	525	0	525	0	525	0	525	0	525	0	525	0	525	0	525	0	525	0	525	0	525	0	525	0	525	8.0728	525	0	0
0	525	0	525	0	525	0	525	0	525	0	525	0	525	0	525	0	525	0	525	0	525	0	525	0	525	8.0828	525	0	0
0	525	0	525	0	525	0	525	0	525	0	525	0	525	0	525	0	525	0	525	0	525	0	525	0	525	8.0928	525	0	0
0	525	0	525	0	525	0	525	0	525	0	525	0	525	0	525	0	525	0	525	0	525	0	525	0	525	8.1028	525	0	0
0	525	0	525	0	525	0	525	0	525	0	525	0	525	0	525	0	525	0	525	0	525	0	525	0	525	8.1128	525	0	0
0	525	0	525	0	525	0	525	0	525	0	525	0	525	0	525	0	525	0	525	0	525	0	525	0	525	8.1229	525	0	0
0	525	0	525	0	525	0	525	0	525	0	525	0	525	0	525	0	525	0	525	0	525	0	525	0	525	8.1329	525	0	0
0	525	0	525	0	525	0	525	0	525	0	525	0	525	0	525	0	525	0	525	0	525	0	525	0	525	8.1429	525	0	0
0	525	0	525	0	525	0	525	0	525	0	525	0	525	0	525	0	525	0	525	0	525	0	525	0	525	8.1529	525	0	0
0	525	0	525	0	525	0	525	0	525	0	525	0	525	0	525	0	525	0	525	0	525	0	525	0	525	8.1629	525	0	0
0	525	0	525	0	525	0	525	0	525	0	525	0	525	0	525	0	525	0	525	0	525	0	525	0	525	8.1729	525	0	0
0	525	0	525	0	525	0	525	0	525	0	525	0	525	0	525	0	525	0	525	0	525	0	525	0	525	8.1829	525	0	0
0	525	0	525	0	525	0	525	0	525	0	525	0	525	0	525	0	525	0	525	0	525	0	525	0	525	8.193	525	0	0
0	525	0	525	0	525	0	525	0	525	0	525	0	525	0	525	0	525	0	525	0	525	0	525	0	525	8.203	525	0	0
0	525	0	525	0	525	0	525	0	525	0	525	0	525	0	525	0	525	0	525	0	525	0	525	0	525	8.213	525	0	0
0	525	0	525	0	525	0	525	0	525	0	525	0	525	0	525	0	525	0	525	0	525	0	525	0	525	8.223	525	0	0
0	525	0	525	0	525	0	525	0	525	0	525	0	525	0	525	0	525	0	525	0	525	0	525	0	525	8.233	525	0	0
0	525	0	525	0	525	0	525	0	525	0	525	0	525	0	525	0	525	0	525	0	525	0	525	0	525	8.243	525	0	0
0	525	0	525	0	525	0	525	0	525	0	525	0	525	0	525	0	525	0	525	0	525	0	525	0	525	8.2531	525	0	0
0	525	0	525	0	525	0	525	0	525	0	525	0	525	0	525	0	525	0	525	0	525	0	525	0	525	8.2631	525	0	0
0	525	0	525	0	525	0	525	0	525	0	525	0	525	0	525	0	525	0	525	0	525	0	525	0	525	8.2731	525	0	0
0	525	0	525	0	525	0	525	0	525	0	525	0	525	0	525	0	525	0	525	0	525	0	525	0	525	8.2831	525	0	0
0	525	0	525	0	525	0	525	0	525	0	525	0	525	0	525	0	525	0	525	0	525	0	525	0	525	8.2931	525	0	0
0	525	0	525	0	525	0	525	0	525	0	525	0	525	0	525	0	525	0	525	0	525	0	525	0	525	8.3031	525	0	0
0	525	0	525	0	525	0	525	0	525	0	525	0	525	0	525	0	525	0	525	0	525	0	525	0	525	8.3132	525	0	0
0	525	0	525	0	525	0	525	0	525	0	525	0	525	0	525	0	525	0	525	0	525	0	525	0	525	8.3232	525	0	0
0	525	0	525	0	525	0	525	0	525	0	525	0	525	0	525	0	525	0	525	0	525	0	525	0	525	8.3332	525	0	0
0	525	0	525	0	525	0	525	0	525	0	525	0	525	0	525	0	525	0	525	0	525	0	525	0	525	8.3432	525	0	0
0	525	0	525	0	525	0	525	0	525	0	525	0	525	0	525	0	525	0	525	0	525	0	525	0	525	8.3532	525	0	0
0	525	0	525	0	525	0	525	0	525	0	525	0	525	0	525	0	525	0	525	0	525	0	525	0	525	8.3632	525	0	0
0	525	0	525	0	525	0	525	0	525	0	525	0	525	0	525	0	525	0	525	0	525	0	525	0	525	8.3732	525	0	0
0	525	0	525	0	525	0	525	0	525	0	525	0	525	0	525	0	525	0	525	0	525	0	525	0	525	8.3833	525	0	0
0	525	0	525	0	525	0	525	0	525	0	525	0	525	0	525	0	525	0	525	0	525	0	525	0	525	8.3933	525	0	0
0	525	0	525	0	525	0	525	0	525	0	525	0	525	0	525	0	525	0	525	0	525	0	525	0	525	8.4033	525	0	0
0	525	0	525	0	525	0	525	0	525	0	525	0	525	0	525	0	525	0	525	0	525	0	525	0	525	8.4133	525	0	0
0	525	0	525	0	525	0	525	0	525	0	525	0	525	0	525	0	525	0	525	0	525	0	525	0	525	8.4233	525	0	0
0	525	0	525	0	525	0	525	0	525	0	525	0	525	0	525	0	525	0	525	0	525	0	525	0	525	8.4333	525	0	0
0	525	0	525	0	525	0	525	0	525	0	525	0	525	0	525	0	525	0	525	0	525	0	525	0	525	8.4434	525	0	0
0	525	0	525	0	525	0	525	0	525	0	525	0	525	0	525	0	525	0	525	0	525	0	525	0	525	8.4534	525	0	0
0	525	0	525	0	525	0	525	0	525	0	525	0	525	0	525	0	525	0	525	0	525	0	525	0	525	8.4634	525	0	0
0	525	0	525	0	525	0	525	0	525	0	525	0	525	0	525	0	525	0	525	0	525	0	525	0	525	8.4734	525	0	0
0	525	0	525	0	525	0	525	0	525	0	525	0	525	0	525	0	525	0	525	0	525	0	525	0	525	8.4834	525	0	0
0	525	0	525	0	525	0	525	0	525	0	525	0	525	0	525	0	525	0	525	0	525	0	525	0	525	8.4934	525	0	0
0	525	0	525	0	525	0	525	0	525	0	525	0	525	0	525	0	525	0	525	0	525	0	525	0	525	8.5035	525	0	0
0	525	0	525	0	525	0	525	0	525	0	525	0	525	0	525	0	525	0	525	0	525	0	525	0	525	8.5135	525	0	0
0	525	0	525	0	525	0	525	0	525	0	525	0	525	0	525	0	525	0	525	0	525	0	525	0	525	8.5235	525	0	0
0	525	0	525	0	525	0	525	0	525	0	525	0	525	0	525	0	525	0	525	0	525	0	525	0	525	8.5335	525	0	0
0	525	0	525	0	525	0	525	0	525	0	525	0	525	0	525	0	525	0	525	0	525	0	525	0	525	8.5435	525	0	0
0	525	0	525	0	525	0	525	0	525	0	525	0	525	0	525	0	525	0	525	0	525	0	525	0	525	8.5535	525	0	0
0	525	0	525	0	525	0	525	0	525	0	525	0	525	0	525	0	525	0	525	0	525	0	525	0	525	8.5635	525	0	0
0	525	0	525	0	525	0	525	0	525	0	525	0	525	0	525	0	525	0	525	0	525	0	525	0	525	8.5736	525	0	0
0	525	0	525	0	525	0	525	0	525	0	525	0	525	0	525	0	525	0	525	0	525	0	525	0	525	8.5836	525	0	0
0	525	0	525	0	525	0	525	0	525	0	525	0	525	0	525	0	525	0	525	0	525	0	525	0	525	8.5936	525	0	0
0	525	0	525	0	525	0	525	0	525	0	525	0	525	0	525	0	525	0	525	0	525	0	525	0	525	8.6036	525	0	0
0	525	0	525	0	525	0	525	0	525	0	525	0	525	0	525	0	525	0	525	0	525	0	525	0	525	8.6136	525	0	0
0	525	0	525	0	525	0	525	0	525	0	525	0	525	0	525	0	525	0	525	0	525	0	525	0	525	8.6236	525	0	0
0	525	0	525	0	525	0	525	0	525	0	525	0	525	0	525	0	525	0	525	0	525	0	525	0	525	8.6337	525	0	0
0	525	0	525	0	525	0	525	0	525	0	525	0	525	0	525	0	525	0	525	0	525	0	525	0	525	8.6437	525	0	0
0	525	0	525	0	525	0	525	0	525	0	525	0	525	0	525	0	525	0	525	0	525	0	525	0	525	8.6537	525	0	0
0	525	0	525	0	525	0	525	0	525	0	525	0	525	0	525	0	525	0	525	0	525	0	525	0	525	8.6637	525	0	0
0	525	0	525	0	525	0	525	0	525	0	525	0	525	0	525	0	525	0	525	0	525	0	525	0	525	8.6737	525	0	0
0	525	0	525	0	525	0	525	0	525	0	525	0	525	0	525	0	525	0	525	0	525	0	525	0	525	8.6837	525	0	0
0	525	0	525	0	525	0	525	0	525	0	525	0	525	0	525	0	525	0	525	0	525	0	525	0	525	8.6938	525	0	0
0	525	0	525	0	525	0	525	0	525	0	525	0	525	0	525	0	525	0	525	0	525	0	525	0	525	8.7038	525	0	0
0	525	0	525	0	525	0	525	0	525	0	525	0	525	0	525	0	525	0	525	0	525	0	525	0	525	8.7138	525	0	0
0	525	0	525	0	525	0	525	0	525	0	525	0	525	0	525	0	525	0	525	0	525	0	525	0	525	8.7238	525	0	0
0	525	0	525	0	525	0	525	0	525	0	525	0	525	0	525	0	525	0	525	0	525	0	525	0	525	8.7338	525	0	0
0	525	0	525	0	525	0	525	0	525	0	525	0	525	0	525	0	525	0	525	0	525	0	525	0	525	8.7438	525	0	0
0	525	0	525	0	525	0	525	0	525	0	525	0	525	0	525	0	525	0	525	0	525	0	525	0	525	8.7538	525	0	0
0	525	0	525	0	525	0	525	0	525	0	525	0	525	0	525	0	525	0	525	0	525	0	525	0	525	8.7639	525	0	0
0	525	0	525	0	525	0	525	0	525	0	525	0	525	0	525	0	525	0	525	0	525	0	525	0	525	8.7739	525	0	0
0	525	0	525	0	525	0	525	0	525	0	525	0	525	0	525	0	525	0	525	0	525	0	525	0	525	8.7839	525	0	0
0	525	0	525	0	525	0	525	0	525	0	525	0	525	0	525	0	525	0	525	0	525	0	525	0	525	8.7939	525	0	0
0	525	0	525	0	525	0	525	0	525	0	525	0	525	0	525	0	525	0	525	0	525	0	525	0	525	8.8039	525	0	0
0	525	0	525	0	525	0	525	0	525	0	525	0	525	0	525	0	525	0	525	0	525	0	525	0	525	8.8139	525	0	0
0	525	0	525	0	525	0	525	0	525	0	525	0	525	0	525	0	525	0	525	0	525	0	525	0	525	8.824	525	0	0
0	525	0	525	0	525	0	525	0	525	0	525	0	525	0	525	0	525	0	525	0	525	0	525	0	525	8.834	525	0	0
0	525	0	525	0	525	0	525	0	525	0	525	0	525	0	525	0	525	0	525	0	525	0	525	0	525	8.844	525	0	0
0	525	0	525	0	525	0	525	0	525	0	525	0	525	0	525	0	525	0	525	0	525	0	525	0	525	8.854	525	0	0
0	525	0	525	0	525	0	525	0	525	0	525	0	525	0	525	0	525	0	525	0	525	0	525	0	525	8.864	525	0	0
0	525	0	525	0	525	0	525	0	525	0	525	0	525	0	525	0	525	0	525	0	525	0	525	0	525	8.874	525	0	0
0	525	0	525	0	525	0	525	0	525	0	525	0	525	0	525	0	525	0	525	0	525	0	525	0	525	8.8841	525	0	0
0	525	0	525	0	525	0	525	0	525	0	525	0	525	0	525	0	525	0	525	0	525	0	525	0	525	8.8941	525	0	0
0	525	0	525	0	525	0	525	0	525	0	525	0	525	0	525	0	525	0	525	0	525	0	525	0	525	8.9041	525	0	0
0	525	0	525	0	525	0	525	0	525	0	525	0	525	0	525	0	525	0	525	0	525	0	525	0	525	8.9141	525	0	0
0	525	0	525	0	525	0	525	0	525	0	525	0	525	0	525	0	525	0	525	0	525	0	525	0	525	8.9241	525	0	0
0	525	0	525	0	525	0	525	0	525	0	525	0	525	0	525	0	525	0	525	0	525	0	525	0	525	8.9341	525	0	0
0	525	0	525	0	525	0	525	0	525	0	525	0	525	0	525	0	525	0	525	0	525	0	525	0	525	8.9442	525	0	0
0	525	0	525	0	525	0	525	0	525	0	525	0	525	0	525	0	525	0	525	0	525	0	525	0	525	8.9542	525	0	0
0	525	0	525	0	525	0	525	0	525	0	525	0	525	0	525	0	525	0	525	0	525	0	525	0	525	8.9642	525	0	0
0	525	0	525	0	525	0	525	0	525	0	525	0	525	0	525	0	525	0	525	0	525	0	525	0	525	8.9742	525	0	0
0	525	0	525	0	525	0	525	0	525	0	525	0	525	0	525	0	525	0	525	0	525	0	525	0	525	8.9842	525	0	0
0	525	0	525	0	525	0	525	0	525	0	525	0	525	0	525	0	525	0	525	0	525	0	525	0	525	8.9942	525	0	0
0	525	0	525	0	525	0	525	0	525	0	525	0	525	0	525	0	525	0	525	0	525	0	525	0	525	9.0042	525	0	0
0	525	0	525	0	525	0	525	0	525	0	525	0	525	0	525	0	525	0	525	0	525	0	525	0	525	9.0143	525	0	0
0	525	0	525	0	525	0	525	0	525	0	525	0	525	0	525	0	525	0	525	0	525	0	525	0	525	9.0243	525	0	0
0	525	0	525	0	525	0	525	0	525	0	525	0	525	0	525	0	525	0	525	0	525	0	525	0	525	9.0343	525	0	0
0	525	0	525	0	525	0	525	0	525	0	525	0	525	0	525	0	525	0	525	0	525	0	525	0	525	9.0443	525	0	0
0	525	0	525	0	525	0	525	0	525	0	525	0	525	0	525	0	525	0	525	0	525	0	525	0	525	9.0543	525	0	0
0	525	0	525	0	525	0	525	0	525	0	525	0	525	0	525	0	525	0	525	0	525	0	525	0	525	9.0643	525	0	0
0	525	0	525	0	525	0	525	0	525	0	525	0	525	0	525	0	525	0	525	0	525	0	525	0	525	9.0744	525	0	0
0	525	0	525	0	525	0	525	0	525	0	525	0	525	0	525	0	525	0	525	0	525	0	525	0	525	9.0844	525	0	0
0	525	0	525	0	525	0	525	0	525	0	525	0	525	0	525	0	525	0	525	0	525	0	525	0	525	9.0944	525	0	0
0	525	0	525	0	525	0	525	0	525	0	525	0	525	0	525	0	525	0	525	0	525	0	525	0	525	9.1044	525	0	0
0	525	0	525	0	525	0	525	0	525	0	525	0	525	0	525	0	525	0	525	0	525	0	525	0	525	9.1144	525	0	0
0	525	0	525	0	525	0	525	0	525	0	525	0	525	0	525	0	525	0	525	0	525	0	525	0	525	9.1244	525	0	0
0	525	0	525	0	525	0	525	0	525	0	525	0	525	0	525	0	525	0	525	0	525	0	525	0	525	9.1345	525	0	0
0	525	0	525	0	525	0	525	0	525	0	525	0	525	0	525	0	525	0	525	0	525	0	525	0	525	9.1445	525	0	0
0	525	0	525	0	525	0	525	0	525	0	525	0	525	0	525	0	525	0	525	0	525	0	525	0	525	9.1545	525	0	0
0	525	0	525	0	525	0	525	0	525	0	525	0	525	0	525	0	525	0	525	0	525	0	525	0	525	9.1645	525	0	0
0	525	0	525	0	525	0	525	0	525	0	525	0	525	0	525	0	525	0	525	0	525	0	525	0	525	9.1745	525	0	0
0	525	0	525	0	525	0	525	0	525	0	525	0	525	0	525	0	525	0	525	0	525	0	525	0	525	9.1845	525	0	0
0	525	0	525	0	525	0	525	0	525	0	525	0	525	0	525	0	525	0	525	0	525	0	525	0	525	9.1945	525	0	0
0	525	0	525	0	525	0	525	0	525	0	525	0	525	0	525	0	525	0	525	0	525	0	525	0	525	9.2046	525	0	0
0	525	0	525	0	525	0	525	0	525	0	525	0	525	0	525	0	525	0	525	0	525	0	525	0	525	9.2146	525	0	0
0	525	0	525	0	525	0	525	0	525	0	525	0	525	0	525	0	525	0	525	0	525	0	525	0	525	9.2246	525	0	0
0	525	0	525	0	525	0	525	0	525	0	525	0	525	0	525	0	525	0	525	0	525	0	525	0	525	9.2346	525	0	0
0	525	0	525	0	525	0	525	0	525	0	525	0	525	0	525	0	525	0	525	0	525	0	525	0	525	9.2446	525	0	0
0	525	0	525	0	525	0	525	0	525	0	525	0	525	0	525	0	525	0	525	0	525	0	525	0	525	9.2546	525	0	0
0	525	0	525	0	525	0	525	0	525	0	525	0	525	0	525	0	525	0	525	0	525	0	525	0	525	9.2647	525	0	0
0	525	0	525	0	525	0	525	0	525	0	525	0	525	0	525	0	525	0	525	0	525	0	525	0	525	9.2747	525	0	0
0	525	0	525	0	525	0	525	0	525	0	525	0	525	0	525	0	525	0	525	0	525	0	525	0	525	9.2847	525	0	0
0	525	0	525	0	525	0	525	0	525	0	525	0	525	0	525	0	525	0	525	0	525	0	525	0	525	9.2947	525	0	0
0	525	0	525	0	525	0	525	0	525	0	525	0	525	0	525	0	525	0	525	0	525	0	525	0	525	9.3047	525	0	0
0	525	0	525	0	525	0	525	0	525	0	525	0	525	0	525	0	525	0	525	0	525	0	525	0	525	9.3147	525	0	0
0	525	0	525	0	525	0	525	0	525	0	525	0	525	0	525	0	525	0	525	0	525	0	525	0	525	9.3248	525	0	0
0	525	0	525	0	525	0	525	0	525	0	525	0	525	0	525	0	525	0	525	0	525	0	525	0	525	9.3348	525	0	0
0	525	0	525	0	525	0	525	0	525	0	525	0	525	0	525	0	525	0	525	0	525	0	525	0	525	9.3448	525	0	0
0	525	0	525	0	525	0	525	0	525	0	525	0	525	0	525	0	525	0	525	0	525	0	525	0	525	9.3548	525	0	0
0	525	0	525	0	525	0	525	0	525	0	525	0	525	0	525	0	525	0	525	0	525	0	525	0	525	9.3648	525	0	0
0	525	0	525	0	525	0	525	0	525	0	525	0	525	0	525	0	525	0	525	0	525	0	525	0	525	9.3748	525	0	0
0	525	0	525	0	525	0	525	0	525	0	525	0	525	0	525	0	525	0	525	0	525	0	525	0	525	9.3848	525	0	0
0	525	0	525	0	525	0	525	0	525	0	525	0	525	0	525	0	525	0	525	0	525	0	525	0	525	9.3949	525	0	0
0	525	0	525	0	525	0	525	0	525	0	525	0	525	0	525	0	525	0	525	0	525	0	525	0	525	9.4049	525	0	0
0	525	0	525	0	525	0	525	0	525	0	525	0	525	0	525	0	525	0	525	0	525	0	525	0	525	9.4149	525	0	0
0	525	0	525	0	525	0	525	0	525	0	525	0	525	0	525	0	525	0	525	0	525	0	525	0	525	9.4249	525	0	0
0	525	0	525	0	525	0	525	0	525	0	525	0	525	0	525	0	525	0	525	0	525	0	525	0	525	9.4349	525	0	0
0	525	0	525	0	525	0	525	0	525	0	525	0	525	0	525	0	525	0	525	0	525	0	525	0	525	9.4449	525	0	0
0	525	0	525	0	525	0	525	0	525	0	525	0	525	0	525	0	525	0	525	0	525	0	525	0	525	9.455	525	0	0
0	525	0	525	0	525	0	525	0	525	0	525	0	525	0	525	0	525	0	525	0	525	0	525	0	525	9.465	525	0	0
0	525	0	525	0	525	0	525	0	525	0	525	0	525	0	525	0	525	0	525	0	525	0	525	0	525	9.475	525	0	0
0	525	0	525	0	525	0	525	0	525	0	525	0	525	0	525	0	525	0	525	0	525	0	525	0	525	9.485	525	0	0
0	525	0	525	0	525	0	525	0	525	0	525	0	525	0	525	0	525	0	525	0	525	0	525	0	525	9.495	525	0	0
0	525	0	525	0	525	0	525	0	525	0	525	0	525	0	525	0	525	0	525	0	525	0	525	0	525	9.505	525	0	0
0	525	0	525	0	525	0	525	0	525	0	525	0	525	0	525	0	525	0	525	0	525	0	525	0	525	9.5151	525	0	0
0	525	0	525	0	525	0	525	0	525	0	525	0	525	0	525	0	525	0	525	0	525	0	525	0	525	9.5251	525	0	0
0	525	0	525	0	525	0	525	0	525	0	525	0	525	0	525	0	525	0	525	0	525	0	525	0	525	9.5351	525	0	0
0	525	0	525	0	525	0	525	0	525	0	525	0	525	0	525	0	525	0	525	0	525	0	525	0	525	9.5451	525	0	0
0	525	0	525	0	525	0	525	0	525	0	525	0	525	0	525	0	525	0	525	0	525	0	525	0	525	9.5551	525	0	0
0	525	0	525	0	525	0	525	0	525	0	525	0	525	0	525	0	525	0	525	0	525	0	525	0	525	9.5651	525	0	0
0	525	0	525	0	525	0	525	0	525	0	525	0	525	0	525	0	525	0	525	0	525	0	525	0	525	9.5751	525	0	0
0	525	0	525	0	525	0	525	0	525	0	525	0	525	0	525	0	525	0	525	0	525	0	525	0	525	9.5852	525	0	0
0	525	0	525	0	525	0	525	0	525	0	525	0	525	0	525	0	525	0	525	0	525	0	525	0	525	9.5952	525	0	0
0	525	0	525	0	525	0	525	0	525	0	525	0	525	0	525	0	525	0	525	0	525	0	525	0	525	9.6052	525	0	0
0	525	0	525	0	525	0	525	0	525	0	525	0	525	0	525	0	525	0	525	0	525	0	525	0	525	9.6152	525	0	0
0	525	0	525	0	525	0	525	0	525	0	525	0	525	0	525	0	525	0	525	0	525	0	525	0	525	9.6252	525	0	0
0	525	0	525	0	525	0	525	0	525	0	525	0	525	0	525	0	525	0	525	0	525	0	525	0	525	9.6352	525	0	0
0	525	0	525	0	525	0	525	0	525	0	525	0	525	0	525	0	525	0	525	0	525	0	525	0	525	9.6453	525	0	0
0	525	0	525	0	525	0	525	0	525	0	525	0	525	0	525	0	525	0	525	0	525	0	525	0	525	9.6553	525	0	0
0	525	0	525	0	525	0	525	0	525	0	525	0	525	0	525	0	525	0	525	0	525	0	525	0	525	9.6653	525	0	0
0	525	0	525	0	525	0	525	0	525	0	525	0	525	0	525	0	525	0	525	0	525	0	525	0	525	9.6753	525	0	0
0	525	0	525	0	525	0	525	0	525	0	525	0	525	0	525	0	525	0	525	0	525	0	525	0	525	9.6853	525	0	0
0	525	0	525	0	525	0	525	0	525	0	525	0	525	0	525	0	525	0	525	0	525	0	525	0	525	9.6953	525	0	0
0	525	0	525	0	525	0	525	0	525	0	525	0	525	0	525	0	525	0	525	0	525	0	525	0	525	9.7054	525	0	0
0	525	0	525	0	525	0	525	0	525	0	525	0	525	0	525	0	525	0	525	0	525	0	525	0	525	9.7154	525	0	0
0	525	0	525	0	525	0	525	0	525	0	525	0	525	0	525	0	525	0	525	0	525	0	525	0	525	9.7254	525	0	0
0	525	0	525	0	525	0	525	0	525	0	525	0	525	0	525	0	525	0	525	0	525	0	525	0	525	9.7354	525	0	0
0	525	0	525	0	525	0	525	0	525	0	525	0	525	0	525	0	525	0	525	0	525	0	525	0	525	9.7454	525	0	0
0	525	0	525	0	525	0	525	0	525	0	525	0	525	0	525	0	525	0	525	0	525	0	525	0	525	9.7554	525	0	0
0	525	0	525	0	525	0	525	0	525	0	525	0	525	0	525	0	525	0	525	0	525	0	525	0	525	9.7654	525	0	0
0	525	0	525	0	525	0	525	0	525	0	525	0	525	0	525	0	525	0	525	0	525	0	525	0	525	9.7755	525	0	0
0	525	0	525	0	525	0	525	0	525	0	525	0	525	0	525	0	525	0	525	0	525	0	525	0	525	9.7855	525	0	0
0	525	0	525	0	525	0	525	0	525	0	525	0	525	0	525	0	525	0	525	0	525	0	525	0	525	9.7955	525	0	0
0	525	0	525	0	525	0	525	0	525	0	525	0	525	0	525	0	525	0	525	0	525	0	525	0	525	9.8055	525	0	0
0	525	0	525	0	525	0	525	0	525	0	525	0	525	0	525	0	525	0	525	0	525	0	525	0	525	9.8155	525	0	0
0	525	0	525	0	525	0	525	0	525	0	525	0	525	0	525	0	525	0	525	0	525	0	525	0	525	9.8255	525	0	0
0	525	0	525	0	525	0	525	0	525	0	525	0	525	0	525	0	525	0	525	0	525	0	525	0	525	9.8356	525	0	0
0	525	0	525	0	525	0	525	0	525	0	525	0	525	0	525	0	525	0	525	0	525	0	525	0	525	9.8456	525	0	0
0	525	0	525	0	525	0	525	0	525	0	525	0	525	0	525	0	525	0	525	0	525	0	525	0	525	9.8556	525	0	0
0	525	0	525	0	525	0	525	0	525	0	525	0	525	0	525	0	525	0	525	0	525	0	525	0	525	9.8656	525	0	0
0	525	0	525	0	525	0	525	0	525	0	525	0	525	0	525	0	525	0	525	0	525	0	525	0	525	9.8756	525	0	0
0	525	0	525	0	525	0	525	0	525	0	525	0	525	0	525	0	525	0	525	0	525	0	525	0	525	9.8856	525	0	0
0	525	0	525	0	525	0	525	0	525	0	525	0	525	0	525	0	525	0	525	0	525	0	525	0	525	9.8957	525	0	0
0	525	0	525	0	525	0	525	0	525	0	525	0	525	0	525	0	525	0	525	0	525	0	525	0	525	9.9057	525	0	0
0	525	0	525	0	525	0	525	0	525	0	525	0	525	0	525	0	525	0	525	0	525	0	525	0	525	9.9157	525	0	0
0	525	0	525	0	525	0	525	0	525	0	525	0	525	0	525	0	525	0	525	0	525	0	525	0	525	9.9257	525	0	0
0	525	0	525	0	525	0	525	0	525	0	525	0	525	0	525	0	525	0	525	0	525	0	525	0	525	9.9357	525	0	0
0	525	0	525	0	525	0	525	0	525	0	525	0	525	0	525	0	525	0	525	0	525	0	525	0	525	9.9457	525	0	0
0	525	0	525	0	525	0	525	0	525	0	525	0	525	0	525	0	525	0	525	0	525	0	525	0	525	9.9558	525	0	0
0	525	0	525	0	525	0	525	0	525	0	525	0	525	0	525	0	525	0	525	0	525	0	525	0	525	9.9658	525	0	0
0	525	0	525	0	525	0	525	0	525	0	525	0	525	0	525	0	525	0	525	0	525	0	525	0	525	9.9758	525	0	0
0	525	0	525	0	525	0	525	0	525	0	525	0	525	0	525	0	525	0	525	0	525	0	525	0	525	9.9858	525	0	0
0	525	0	525	0	525	0	525	0	525	0	525	0	525	0	525	0	525	0	525	0	525	0	525	0	525	9.9958	525	0	0
0	525	0	525	0	525	0	525	0	525	0	525	0	525	0	525	0	525	0	525	0	525	0	525	0	525	10.0058	525	0	0
0	525	0	525	0	525	0	525	0	525	0	525	0	525	0	525	0	525	0	525	0	525	0	525	0	525	10.0158	525	0	0
0	525	0	525	0	525	0	525	0	525	0	525	0	525	0	525	0	525	0	525	0	525	0	525	0	525	10.0259	525	0	0
0	525	0	525	0	525	0	525	0	525	0	525	0	525	0	525	0	525	0	525	0	525	0	525	0	525	10.0359	525	0	0
0	525	0	525	0	525	0	525	0	525	0	525	0	525	0	525	0	525	0	525	0	525	0	525	0	525	10.0459	525	0	0
0	525	0	525	0	525	0	525	0	525	0	525	0	525	0	525	0	525	0	525	0	525	0	525	0	525	10.0559	525	0	0
0	525	0	525	0	525	0	525	0	525	0	525	0	525	0	525	0	525	0	525	0	525	0	525	0	525	10.0659	525	0	0
0	525	0	525	0	525	0	525	0	525	0	525	0	525	0	525	0	525	0	525	0	525	0	525	0	525	10.0759	525	0	0
0	525	0	525	0	525	0	525	0	525	0	525	0	525	0	525	0	525	0	525	0	525	0	525	0	525	10.086	525	0	0
0	525	0	525	0	525	0	525	0	525	0	525	0	525	0	525	0	525	0	525	0	525	0	525	0	525	10.096	525	0	0
0	525	0	525	0	525	0	525	0	525	0	525	0	525	0	525	0	525	0	525	0	525	0	525	0	525	10.106	525	0	0
0	525	0	525	0	525	0	525	0	525	0	525	0	525	0	525	0	525	0	525	0	525	0	525	0	525	10.116	525	0	0
0	525	0	525	0	525	0	525	0	525	0	525	0	525	0	525	0	525	0	525	0	525	0	525	0	525	10.126	525	0	0
0	525	0	525	0	525	0	525	0	525	0	525	0	525	0	525	0	525	0	525	0	525	0	525	0	525	10.136	525	0	0
0	525	0	525	0	525	0	525	0	525	0	525	0	525	0	525	0	525	0	525	0	525	0	525	0	525	10.1461	525	0	0
0	525	0	525	0	525	0	525	0	525	0	525	0	525	0	525	0	525	0	525	0	525	0	525	0	525	10.1561	525	0	0
0	525	0	525	0	525	0	525	0	525	0	525	0	525	0	525	0	525	0	525	0	525	0	525	0	525	10.1661	525	0	0
0	525	0	525	0	525	0	525	0	525	0	525	0	525	0	525	0	525	0	525	0	525	0	525	0	525	10.1761	525	0	0
0	525	0	525	0	525	0	525	0	525	0	525	0	525	0	525	0	525	0	525	0	525	0	525	0	525	10.1861	525	0	0
0	525	0	525	0	525	0	525	0	525	0	525	0	525	0	525	0	525	0	525	0	525	0	525	0	525	10.1961	525	0	0
0	525	0	525	0	525	0	525	0	525	0	525	0	525	0	525	0	525	0	525	0	525	0	525	0	525	10.2061	525	0	0
0	525	0	525	0	525	0	525	0	525	0	525	0	525	0	525	0	525	0	525	0	525	0	525	0	525	10.2162	525	0	0
0	525	0	525	0	525	0	525	0	525	0	525	0	525	0	525	0	525	0	525	0	525	0	525	0	525	10.2262	525	0	0
0	525	0	525	0	525	0	525	0	525	0	525	0	525	0	525	0	525	0	525	0	525	0	525	0	525	10.2362	525	0	0
0	525	0	525	0	525	0	525	0	525	0	525	0	525	0	525	0	525	0	525	0	525	0	525	0	525	10.2462	525	0	0
0	525	0	525	0	525	0	525	0	525	0	525	0	525	0	525	0	525	0	525	0	525	0	525	0	525	10.2562	525	0	0
0	525	0	525	0	525	0	525	0	525	0	525	0	525	0	525	0	525	0	525	0	525	0	525	0	525	10.2662	525	0	0
0	525	0	525	0	525	0	525	0	525	0	525	0	525	0	525	0	525	0	525	0	525	0	525	0	525	10.2763	525	0	0
0	525	0	525	0	525	0	525	0	525	0	525	0	525	0	525	0	525	0	525	0	525	0	525	0	525	10.2863	525	0	0
0	525	0	525	0	525	0	525	0	525	0	525	0	525	0	525	0	525	0	525	0	525	0	525	0	525	10.2963	525	0	0
0	525	0	525	0	525	0	525	0	525	0	525	0	525	0	525	0	525	0	525	0	525	0	525	0	525	10.3063	525	0	0
0	525	0	525	0	525	0	525	0	525	0	525	0	525	0	525	0	525	0	525	0	525	0	525	0	525	10.3163	525	0	0
0	525	0	525	0	525	0	525	0	525	0	525	0	525	0	525	0	525	0	525	0	525	0	525	0	525	10.3263	525	0	0
0	525	0	525	0	525	0	525	0	525	0	525	0	525	0	525	0	525	0	525	0	525	0	525	0	525	10.3364	525	0	0
0	525	0	525	0	525	0	525	0	525	0	525	0	525	0	525	0	525	0	525	0	525	0	525	0	525	10.3464	525	0	0
0	525	0	525	0	525	0	525	0	525	0	525	0	525	0	525	0	525	0	525	0	525	0	525	0	525	10.3564	525	0	0
0	525	0	525	0	525	0	525	0	525	0	525	0	525	0	525	0	525	0	525	0	525	0	525	0	525	10.3664	525	0	0
0	525	0	525	0	525	0	525	0	525	0	525	0	525	0	525	0	525	0	525	0	525	0	525	0	525	10.3764	525	0	0
0	525	0	525	0	525	0	525	0	525	0	525	0	525	0	525	0	525	0	525	0	525	0	525	0	525	10.3864	525	0	0
0	525	0	525	0	525	0	525	0	525	0	525	0	525	0	525	0	525	0	525	0	525	0	525	0	525	10.3964	525	0	0
0	525	0	525	0	525	0	525	0	525	0	525	0	525	0	525	0	525	0	525	0	525	0	525	0	525	10.4065	525	0	0
0	525	0	525	0	525	0	525	0	525	0	525	0	525	0	525	0	525	0	525	0	525	0	525	0	525	10.4165	525	0	0
0	525	0	525	0	525	0	525	0	525	0	525	0	525	0	525	0	525	0	525	0	525	0	525	0	525	10.4265	525	0	0
0	525	0	525	0	525	0	525	0	525	0	525	0	525	0	525	0	525	0	525	0	525	0	525	0	525	10.4365	525	0	0
0	525	0	525	0	525	0	525	0	525	0	525	0	525	0	525	0	525	0	525	0	525	0	525	0	525	10.4465	525	0	0
0	525	0	525	0	525	0	525	0	525	0	525	0	525	0	525	0	525	0	525	0	525	0	525	0	525	10.4565	525	0	0
0	525	0	525	0	525	0	525	0	525	0	525	0	525	0	525	0	525	0	525	0	525	0	525	0	525	10.4666	525	0	0
0	525	0	525	0	525	0	525	0	525	0	525	0	525	0	525	0	525	0	525	0	525	0	525	0	525	10.4766	525	0	0
0	525	0	525	0	525	0	525	0	525	0	525	0	525	0	525	0	525	0	525	0	525	0	525	0	525	10.4866	525	0	0
0	525	0	525	0	525	0	525	0	525	0	525	0	525	0	525	0	525	0	525	0	525	0	525	0	525	10.4966	525	0	0
0	525	0	525	0	525	0	525	0	525	0	525	0	525	0	525	0	525	0	525	0	525	0	525	0	525	10.5066	525	0	0
0	525	0	525	0	525	0	525	0	525	0	525	0	525	0	525	0	525	0	525	0	525	0	525	0	525	10.5166	525	0	0
0	525	0	525	0	525	0	525	0	525	0	525	0	525	0	525	0	525	0	525	0	525	0	525	0	525	10.5267	525	0	0
0	525	0	525	0	525	0	525	0	525	0	525	0	525	0	525	0	525	0	525	0	525	0	525	0	525	10.5367	525	0	0
0	525	0	525	0	525	0	525	0	525	0	525	0	525	0	525	0	525	0	525	0	525	0	525	0	525	10.5467	525	0	0
0	525	0	525	0	525	0	525	0	525	0	525	0	525	0	525	0	525	0	525	0	525	0	525	0	525	10.5567	525	0	0
0	525	0	525	0	525	0	525	0	525	0	525	0	525	0	525	0	525	0	525	0	525	0	525	0	525	10.5667	525	0	0
0	525	0	525	0	525	0	525	0	525	0	525	0	525	0	525	0	525	0	525	0	525	0	525	0	525	10.5767	525	0	0
0	525	0	525	0	525	0	525	0	525	0	525	0	525	0	525	0	525	0	525	0	525	0	525	0	525	10.5867	525	0	0
0	525	0	525	0	525	0	525	0	525	0	525	0	525	0	525	0	525	0	525	0	525	0	525	0	525	10.5968	525	0	0
0	525	0	525	0	525	0	525	0	525	0	525	0	525	0	525	0	525	0	525	0	525	0	525	0	525	10.6068	525	0	0
0	525	0	525	0	525	0	525	0	525	0	525	0	525	0	525	0	525	0	525	0	525	0	525	0	525	10.6168	525	0	0
0	525	0	525	0	525	0	525	0	525	0	525	0	525	0	525	0	525	0	525	0	525	0	525	0	525	10.6268	525	0	0
0	525	0	525	0	525	0	525	0	525	0	525	0	525	0	525	0	525	0	525	0	525	0	525	0	525	10.6368	525	0	0
0	525	0	525	0	525	0	525	0	525	0	525	0	525	0	525	0	525	0	525	0	525	0	525	0	525	10.6468	525	0	0
0	525	0	525	0	525	0	525	0	525	0	525	0	525	0	525	0	525	0	525	0	525	0	525	0	525	10.6569	525	0	0
0	525	0	525	0	525	0	525	0	525	0	525	0	525	0	525	0	525	0	525	0	525	0	525	0	525	10.6669	525	0	0
0	525	0	525	0	525	0	525	0	525	0	525	0	525	0	525	0	525	0	525	0	525	0	525	0	525	10.6769	525	0	0
0	525	0	525	0	525	0	525	0	525	0	525	0	525	0	525	0	525	0	525	0	525	0	525	0	525	10.6869	525	0	0
0	525	0	525	0	525	0	525	0	525	0	525	0	525	0	525	0	525	0	525	0	525	0	525	0	525	10.6969	525	0	0
0	525	0	525	0	525	0	525	0	525	0	525	0	525	0	525	0	525	0	525	0	525	0	525	0	525	10.7069	525	0	0
0	525	0	525	0	525	0	525	0	525	0	525	0	525	0	525	0	525	0	525	0	525	0	525	0	525	10.717	525	0	0
0	525	0	525	0	525	0	525	0	525	0	525	0	525	0	525	0	525	0	525	0	525	0	525	0	525	10.727	525	0	0
0	525	0	525	0	525	0	525	0	525	0	525	0	525	0	525	0	525	0	525	0	525	0	525	0	525	10.737	525	0	0
0	525	0	525	0	525	0	525	0	525	0	525	0	525	0	525	0	525	0	525	0	525	0	525	0	525	10.747	525	0	0
0	525	0	525	0	525	0	525	0	525	0	525	0	525	0	525	0	525	0	525	0	525	0	525	0	525	10.757	525	0	0
0	525	0	525	0	525	0	525	0	525	0	525	0	525	0	525	0	525	0	525	0	525	0	525	0	525	10.767	525	0	0
0	525	0	525	0	525	0	525	0	525	0	525	0	525	0	525	0	525	0	525	0	525	0	525	0	525	10.7771	525	0	0
0	525	0	525	0	525	0	525	0	525	0	525	0	525	0	525	0	525	0	525	0	525	0	525	0	525	10.7871	525	0	0
0	525	0	525	0	525	0	525	0	525	0	525	0	525	0	525	0	525	0	525	0	525	0	525	0	525	10.7971	525	0	0
0	525	0	525	0	525	0	525	0	525	0	525	0	525	0	525	0	525	0	525	0	525	0	525	0	525	10.8071	525	0	0
0	525	0	525	0	525	0	525	0	525	0	525	0	525	0	525	0	525	0	525	0	525	0	525	0	525	10.8171	525	0	0
0	525	0	525	0	525	0	525	0	525	0	525	0	525	0	525	0	525	0	525	0	525	0	525	0	525	10.8271	525	0	0
0	525	0	525	0	525	0	525	0	525	0	525	0	525	0	525	0	525	0	525	0	525	0	525	0	525	10.8371	525	0	0
0	525	0	525	0	525	0	525	0	525	0	525	0	525	0	525	0	525	0	525	0	525	0	525	0	525	10.8472	525	0	0
0	525	0	525	0	525	0	525	0	525	0	525	0	525	0	525	0	525	0	525	0	525	0	525	0	525	10.8572	525	0	0
0	525	0	525	0	525	0	525	0	525	0	525	0	525	0	525	0	525	0	525	0	525	0	525	0	525	10.8672	525	0	0
0	525	0	525	0	525	0	525	0	525	0	525	0	525	0	525	0	525	0	525	0	525	0	525	0	525	10.8772	525	0	0
0	525	0	525	0	525	0	525	0	525	0	525	0	525	0	525	0	525	0	525	0	525	0	525	0	525	10.8872	525	0	0
0	525	0	525	0	525	0	525	0	525	0	525	0	525	0	525	0	525	0	525	0	525	0	525	0	525	10.8972	525	0	0
0	525	0	525	0	525	0	525	0	525	0	525	0	525	0	525	0	525	0	525	0	525	0	525	0	525	10.9073	525	0	0
0	525	0	525	0	525	0	525	0	525	0	525	0	525	0	525	0	525	0	525	0	525	0	525	0	525	10.9173	525	0	0
0	525	0	525	0	525	0	525	0	525	0	525	0	525	0	525	0	525	0	525	0	525	0	525	0	525	10.9273	525	0	0
0	525	0	525	0	525	0	525	0	525	0	525	0	525	0	525	0	525	0	525	0	525	0	525	0	525	10.9373	525	0	0
0	525	0	525	0	525	0	525	0	525	0	525	0	525	0	525	0	525	0	525	0	525	0	525	0	525	10.9473	525	0	0
0	525	0	525	0	525	0	525	0	525	0	525	0	525	0	525	0	525	0	525	0	525	0	525	0	525	10.9573	525	0	0
0	525	0	525	0	525	0	525	0	525	0	525	0	525	0	525	0	525	0	525	0	525	0	525	0	525	10.9674	525	0	0
0	525	0	525	0	525	0	525	0	525	0	525	0	525	0	525	0	525	0	525	0	525	0	525	0	525	10.9774	525	0	0
0	525	0	525	0	525	0	525	0	525	0	525	0	525	0	525	0	525	0	525	0	525	0	525	0	525	10.9874	525	0	0
0	525	0	525	0	525	0	525	0	525	0	525	0	525	0	525	0	525	0	525	0	525	0	525	0	525	10.9974	525	0	0
0	525	0	525	0	525	0	525	0	525	0	525	0	525	0	525	0	525	0	525	0	525	0	525	0	525	11.0074	525	0	0
0	525	0	525	0	525	0	525	0	525	0	525	0	525	0	525	0	525	0	525	0	525	0	525	0	525	11.0174	525	0	0
0	525	0	525	0	525	0	525	0	525	0	525	0	525	0	525	0	525	0	525	0	525	0	525	0	525	11.0274	525	0	0
0	525	0	525	0	525	0	525	0	525	0	525	0	525	0	525	0	525	0	525	0	525	0	525	0	525	11.0375	525	0	0
0	525	0	525	0	525	0	525	0	525	0	525	0	525	0	525	0	525	0	525	0	525	0	525	0	525	11.0475	525	0	0
0	525	0	525	0	525	0	525	0	525	0	525	0	525	0	525	0	525	0	525	0	525	0	525	0	525	11.0575	525	0	0
0	525	0	525	0	525	0	525	0	525	0	525	0	525	0	525	0	525	0	525	0	525	0	525	0	525	11.0675	525	0	0
0	525	0	525	0	525	0	525	0	525	0	525	0	525	0	525	0	525	0	525	0	525	0	525	0	525	11.0775	525	0	0
0	525	0	525	0	525	0	525	0	525	0	525	0	525	0	525	0	525	0	525	0	525	0	525	0	525	11.0875	525	0	0
0	525	0	525	0	525	0	525	0	525	0	525	0	525	0	525	0	525	0	525	0	525	0	525	0	525	11.0976	525	0	0
0	525	0	525	0	525	0	525	0	525	0	525	0	525	0	525	0	525	0	525	0	525	0	525	0	525	11.1076	525	0	0
0	525	0	525	0	525	0	525	0	525	0	525	0	525	0	525	0	525	0	525	0	525	0	525	0	525	11.1176	525	0	0
0	525	0	525	0	525	0	525	0	525	0	525	0	525	0	525	0	525	0	525	0	525	0	525	0	525	11.1276	525	0	0
0	525	0	525	0	525	0	525	0	525	0	525	0	525	0	525	0	525	0	525	0	525	0	525	0	525	11.1376	525	0	0
0	525	0	525	0	525	0	525	0	525	0	525	0	525	0	525	0	525	0	525	0	525	0	525	0	525	11.1476	525	0	0
0	525	0	525	0	525	0	525	0	525	0	525	0	525	0	525	0	525	0	525	0	525	0	525	0	525	11.1577	525	0	0
0	525	0	525	0	525	0	525	0	525	0	525	0	525	0	525	0	525	0	525	0	525	0	525	0	525	11.1677	525	0	0
0	525	0	525	0	525	0	525	0	525	0	525	0	525	0	525	0	525	0	525	0	525	0	525	0	525	11.1777	525	0	0
0	525	0	525	0	525	0	525	0	525	0	525	0	525	0	525	0	525	0	525	0	525	0	525	0	525	11.1877	525	0	0
0	525	0	525	0	525	0	525	0	525	0	525	0	525	0	525	0	525	0	525	0	525	0	525	0	525	11.1977	525	0	0
0	525	0	525	0	525	0	525	0	525	0	525	0	525	0	525	0	525	0	525	0	525	0	525	0	525	11.2077	525	0	0
0	525	0	525	0	525	0	525	0	525	0	525	0	525	0	525	0	525	0	525	0	525	0	525	0	525	11.2177	525	0	0
0	525	0	525	0	525	0	525	0	525	0	525	0	525	0	525	0	525	0	525	0	525	0	525	0	525	11.2278	525	0	0
0	525	0	525	0	525	0	525	0	525	0	525	0	525	0	525	0	525	0	525	0	525	0	525	0	525	11.2378	525	0	0
0	525	0	525	0	525	0	525	0	525	0	525	0	525	0	525	0	525	0	525	0	525	0	525	0	525	11.2478	525	0	0
0	525	0	525	0	525	0	525	0	525	0	525	0	525	0	525	0	525	0	525	0	525	0	525	0	525	11.2578	525	0	0
0	525	0	525	0	525	0	525	0	525	0	525	0	525	0	525	0	525	0	525	0	525	0	525	0	525	11.2678	525	0	0
0	525	0	525	0	525	0	525	0	525	0	525	0	525	0	525	0	525	0	525	0	525	0	525	0	525	11.2778	525	0	0
0	525	0	525	0	525	0	525	0	525	0	525	0	525	0	525	0	525	0	525	0	525	0	525	0	525	11.2879	525	0	0
0	525	0	525	0	525	0	525	0	525	0	525	0	525	0	525	0	525	0	525	0	525	0	525	0	525	11.2979	525	0	0
0	525	0	525	0	525	0	525	0	525	0	525	0	525	0	525	0	525	0	525	0	525	0	525	0	525	11.3079	525	0	0
0	525	0	525	0	525	0	525	0	525	0	525	0	525	0	525	0	525	0	525	0	525	0	525	0	525	11.3179	525	0	0
0	525	0	525	0	525	0	525	0	525	0	525	0	525	0	525	0	525	0	525	0	525	0	525	0	525	11.3279	525	0	0
0	525	0	525	0	525	0	525	0	525	0	525	0	525	0	525	0	525	0	525	0	525	0	525	0	525	11.3379	525	0	0
0	525	0	525	0	525	0	525	0	525	0	525	0	525	0	525	0	525	0	525	0	525	0	525	0	525	11.348	525	0	0
0	525	0	525	0	525	0	525	0	525	0	525	0	525	0	525	0	525	0	525	0	525	0	525	0	525	11.358	525	0	0
0	525	0	525	0	525	0	525	0	525	0	525	0	525	0	525	0	525	0	525	0	525	0	525	0	525	11.368	525	0	0
0	525	0	525	0	525	0	525	0	525	0	525	0	525	0	525	0	525	0	525	0	525	0	525	0	525	11.378	525	0	0
0	525	0	525	0	525	0	525	0	525	0	525	0	525	0	525	0	525	0	525	0	525	0	525	0	525	11.388	525	0	0
0	525	0	525	0	525	0	525	0	525	0	525	0	525	0	525	0	525	0	525	0	525	0	525	0	525	11.398	525	0	0
0	525	0	525	0	525	0	525	0	525	0	525	0	525	0	525	0	525	0	525	0	525	0	525	0	525	11.408	525	0	0
0	525	0	525	0	525	0	525	0	525	0	525	0	525	0	525	0	525	0	525	0	525	0	525	0	525	11.4181	525	0	0
0	525	0	525	0	525	0	525	0	525	0	525	0	525	0	525	0	525	0	525	0	525	0	525	0	525	11.4281	525	0	0
0	525	0	525	0	525	0	525	0	525	0	525	0	525	0	525	0	525	0	525	0	525	0	525	0	525	11.4381	525	0	0
0	525	0	525	0	525	0	525	0	525	0	525	0	525	0	525	0	525	0	525	0	525	0	525	0	525	11.4481	525	0	0
0	525	0	525	0	525	0	525	0	525	0	525	0	525	0	525	0	525	0	525	0	525	0	525	0	525	11.4581	525	0	0
0	525	0	525	0	525	0	525	0	525	0	525	0	525	0	525	0	525	0	525	0	525	0	525	0	525	11.4681	525	0	0
0	525	0	525	0	525	0	525	0	525	0	525	0	525	0	525	0	525	0	525	0	525	0	525	0	525	11.4782	525	0	0
0	525	0	525	0	525	0	525	0	525	0	525	0	525	0	525	0	525	0	525	0	525	0	525	0	525	11.4882	525	0	0
0	525	0	525	0	525	0	525	0	525	0	525	0	525	0	525	0	525	0	525	0	525	0	525	0	525	11.4982	525	0	0
0	525	0	525	0	525	0	525	0	525	0	525	0	525	0	525	0	525	0	525	0	525	0	525	0	525	11.5082	525	0	0
0	525	0	525	0	525	0	525	0	525	0	525	0	525	0	525	0	525	0	525	0	525	0	525	0	525	11.5182	525	0	0
0	525	0	525	0	525	0	525	0	525	0	525	0	525	0	525	0	525	0	525	0	525	0	525	0	525	11.5282	525	0	0
0	525	0	525	0	525	0	525	0	525	0	525	0	525	0	525	0	525	0	525	0	525	0	525	0	525	11.5383	525	0	0
0	525	0	525	0	525	0	525	0	525	0	525	0	525	0	525	0	525	0	525	0	525	0	525	0	525	11.5483	525	0	0
0	525	0	525	0	525	0	525	0	525	0	525	0	525	0	525	0	525	0	525	0	525	0	525	0	525	11.5583	525	0	0
0	525	0	525	0	525	0	525	0	525	0	525	0	525	0	525	0	525	0	525	0	525	0	525	0	525	11.5683	525	0	0
0	525	0	525	0	525	0	525	0	525	0	525	0	525	0	525	0	525	0	525	0	525	0	525	0	525	11.5783	525	0	0
0	525	0	525	0	525	0	525	0	525	0	525	0	525	0	525	0	525	0	525	0	525	0	525	0	525	11.5883	525	0	0
0	525	0	525	0	525	0	525	0	525	0	525	0	525	0	525	0	525	0	525	0	525	0	525	0	525	11.5983	525	0	0
0	525	0	525	0	525	0	525	0	525	0	525	0	525	0	525	0	525	0	525	0	525	0	525	0	525	11.6084	525	0	0
0	525	0	525	0	525	0	525	0	525	0	525	0	525	0	525	0	525	0	525	0	525	0	525	0	525	11.6184	525	0	0
0	525	0	525	0	525	0	525	0	525	0	525	0	525	0	525	0	525	0	525	0	525	0	525	0	525	11.6284	525	0	0
0	525	0	525	0	525	0	525	0	525	0	525	0	525	0	525	0	525	0	525	0	525	0	525	0	525	11.6384	525	0	0
0	525	0	525	0	525	0	525	0	525	0	525	0	525	0	525	0	525	0	525	0	525	0	525	0	525	11.6484	525	0	0
0	525	0	525	0	525	0	525	0	525	0	525	0	525	0	525	0	525	0	525	0	525	0	525	0	525	11.6584	525	0	0
0	525	0	525	0	525	0	525	0	525	0	525	0	525	0	525	0	525	0	525	0	525	0	525	0	525	11.6685	525	0	0
0	525	0	525	0	525	0	525	0	525	0	525	0	525	0	525	0	525	0	525	0	525	0	525	0	525	11.6785	525	0	0
0	525	0	525	0	525	0	525	0	525	0	525	0	525	0	525	0	525	0	525	0	525	0	525	0	525	11.6885	525	0	0
0	525	0	525	0	525	0	525	0	525	0	525	0	525	0	525	0	525	0	525	0	525	0	525	0	525	11.6985	525	0	0
0	525	0	525	0	525	0	525	0	525	0	525	0	525	0	525	0	525	0	525	0	525	0	525	0	525	11.7085	525	0	0
0	525	0	525	0	525	0	525	0	525	0	525	0	525	0	525	0	525	0	525	0	525	0	525	0	525	11.7185	525	0	0
0	525	0	525	0	525	0	525	0	525	0	525	0	525	0	525	0	525	0	525	0	525	0	525	0	525	11.7286	525	0	0
0	525	0	525	0	525	0	525	0	525	0	525	0	525	0	525	0	525	0	525	0	525	0	525	0	525	11.7386	525	0	0
0	525	0	525	0	525	0	525	0	525	0	525	0	525	0	525	0	525	0	525	0	525	0	525	0	525	11.7486	525	0	0
0	525	0	525	0	525	0	525	0	525	0	525	0	525	0	525	0	525	0	525	0	525	0	525	0	525	11.7586	525	0	0
0	525	0	525	0	525	0	525	0	525	0	525	0	525	0	525	0	525	0	525	0	525	0	525	0	525	11.7686	525	0	0
0	525	0	525	0	525	0	525	0	525	0	525	0	525	0	525	0	525	0	525	0	525	0	525	0	525	11.7786	525	0	0
0	525	0	525	0	525	0	525	0	525	0	525	0	525	0	525	0	525	0	525	0	525	0	525	0	525	11.7887	525	0	0
0	525	0	525	0	525	0	525	0	525	0	525	0	525	0	525	0	525	0	525	0	525	0	525	0	525	11.7987	525	0	0
0	525	0	525	0	525	0	525	0	525	0	525	0	525	0	525	0	525	0	525	0	525	0	525	0	525	11.8087	525	0	0
0	525	0	525	0	525	0	525	0	525	0	525	0	525	0	525	0	525	0	525	0	525	0	525	0	525	11.8187	525	0	0
0	525	0	525	0	525	0	525	0	525	0	525	0	525	0	525	0	525	0	525	0	525	0	525	0	525	11.8287	525	0	0
0	525	0	525	0	525	0	525	0	525	0	525	0	525	0	525	0	525	0	525	0	525	0	525	0	525	11.8387	525	0	0
0	525	0	525	0	525	0	525	0	525	0	525	0	525	0	525	0	525	0	525	0	525	0	525	0	525	11.8487	525	0	0
0	525	0	525	0	525	0	525	0	525	0	525	0	525	0	525	0	525	0	525	0	525	0	525	0	525	11.8588	525	0	0
0	525	0	525	0	525	0	525	0	525	0	525	0	525	0	525	0	525	0	525	0	525	0	525	0	525	11.8688	525	0	0
0	525	0	525	0	525	0	525	0	525	0	525	0	525	0	525	0	525	0	525	0	525	0	525	0	525	11.8788	525	0	0
0	525	0	525	0	525	0	525	0	525	0	525	0	525	0	525	0	525	0	525	0	525	0	525	0	525	11.8888	525	0	0
0	525	0	525	0	525	0	525	0	525	0	525	0	525	0	525	0	525	0	525	0	525	0	525	0	525	11.8988	525	0	0
0	525	0	525	0	525	0	525	0	525	0	525	0	525	0	525	0	525	0	525	0	525	0	525	0	525	11.9088	525	0	0
0	525	0	525	0	525	0	525	0	525	0	525	0	525	0	525	0	525	0	525	0	525	0	525	0	525	11.9189	525	0	0
0	525	0	525	0	525	0	525	0	525	0	525	0	525	0	525	0	525	0	525	0	525	0	525	0	525	11.9289	525	0	0
0	525	0	525	0	525	0	525	0	525	0	525	0	525	0	525	0	525	0	525	0	525	0	525	0	525	11.9389	525	0	0
0	525	0	525	0	525	0	525	0	525	0	525	0	525	0	525	0	525	0	525	0	525	0	525	0	525	11.9489	525	0	0
0	525	0	525	0	525	0	525	0	525	0	525	0	525	0	525	0	525	0	525	0	525	0	525	0	525	11.9589	525	0	0
0	525	0	525	0	525	0	525	0	525	0	525	0	525	0	525	0	525	0	525	0	525	0	525	0	525	11.9689	525	0	0
0	525	0	525	0	525	0	525	0	525	0	525	0	525	0	525	0	525	0	525	0	525	0	525	0	525	11.979	525	0	0
0	525	0	525	0	525	0	525	0	525	0	525	0	525	0	525	0	525	0	525	0	525	0	525	0	525	11.989	525	0	0
0	525	0	525	0	525	0	525	0	525	0	525	0	525	0	525	0	525	0	525	0	525	0	525	0	525	11.999	525	0	0
0	525	0	525	0	525	0	525	0	525	0	525	0	525	0	525	0	525	0	525	0	525	0	525	0	525	12.009	525	0	0
0	525	0	525	0	525	0	525	0	525	0	525	0	525	0	525	0	525	0	525	0	525	0	525	0	525	12.019	525	0	0
0	525	0	525	0	525	0	525	0	525	0	525	0	525	0	525	0	525	0	525	0	525	0	525	0	525	12.029	525	0	0
0	525	0	525	0	525	0	525	0	525	0	525	0	525	0	525	0	525	0	525	0	525	0	525	0	525	12.039	525	0	0
0	525	0	525	0	525	0	525	0	525	0	525	0	525	0	525	0	525	0	525	0	525	0	525	0	525	12.0491	525	0	0
0	525	0	525	0	525	0	525	0	525	0	525	0	525	0	525	0	525	0	525	0	525	0	525	0	525	12.0591	525	0	0
0	525	0	525	0	525	0	525	0	525	0	525	0	525	0	525	0	525	0	525	0	525	0	525	0	525	12.0691	525	0	0
0	525	0	525	0	525	0	525	0	525	0	525	0	525	0	525	0	525	0	525	0	525	0	525	0	525	12.0791	525	0	0
0	525	0	525	0	525	0	525	0	525	0	525	0	525	0	525	0	525	0	525	0	525	0	525	0	525	12.0891	525	0	0
0	525	0	525	0	525	0	525	0	525	0	525	0	525	0	525	0	525	0	525	0	525	0	525	0	525	12.0991	525	0	0
0	525	0	525	0	525	0	525	0	525	0	525	0	525	0	525	0	525	0	525	0	525	0	525	0	525	12.1092	525	0	0
0	525	0	525	0	525	0	525	0	525	0	525	0	525	0	525	0	525	0	525	0	525	0	525	0	525	12.1192	525	0	0
0	525	0	525	0	525	0	525	0	525	0	525	0	525	0	525	0	525	0	525	0	525	0	525	0	525	12.1292	525	0	0
0	525	0	525	0	525	0	525	0	525	0	525	0	525	0	525	0	525	0	525	0	525	0	525	0	525	12.1392	525	0	0
0	525	0	525	0	525	0	525	0	525	0	525	0	525	0	525	0	525	0	525	0	525	0	525	0	525	12.1492	525	0	0
0	525	0	525	0	525	0	525	0	525	0	525	0	525	0	525	0	525	0	525	0	525	0	525	0	525	12.1592	525	0	0
0	525	0	525	0	525	0	525	0	525	0	525	0	525	0	525	0	525	0	525	0	525	0	525	0	525	12.1693	525	0	0
0	525	0	525	0	525	0	525	0	525	0	525	0	525	0	525	0	525	0	525	0	525	0	525	0	525	12.1793	525	0	0
0	525	0	525	0	525	0	525	0	525	0	525	0	525	0	525	0	525	0	525	0	525	0	525	0	525	12.1893	525	0	0
0	525	0	525	0	525	0	525	0	525	0	525	0	525	0	525	0	525	0	525	0	525	0	525	0	525	12.1993	525	0	0
0	525	0	525	0	525	0	525	0	525	0	525	0	525	0	525	0	525	0	525	0	525	0	525	0	525	12.2093	525	0	0
0	525	0	525	0	525	0	525	0	525	0	525	0	525	0	525	0	525	0	525	0	525	0	525	0	525	12.2193	525	0	0
0	525	0	525	0	525	0	525	0	525	0	525	0	525	0	525	0	525	0	525	0	525	0	525	0	525	12.2293	525	0	0
0	525	0	525	0	525	0	525	0	525	0	525	0	525	0	525	0	525	0	525	0	525	0	525	0	525	12.2394	525	0	0
0	525	0	525	0	525	0	525	0	525	0	525	0	525	0	525	0	525	0	525	0	525	0	525	0	525	12.2494	525	0	0
0	525	0	525	0	525	0	525	0	525	0	525	0	525	0	525	0	525	0	525	0	525	0	525	0	525	12.2594	525	0	0
0	525	0	525	0	525	0	525	0	525	0	525	0	525	0	525	0	525	0	525	0	525	0	525	0	525	12.2694	525	0	0
0	525	0	525	0	525	0	525	0	525	0	525	0	525	0	525	0	525	0	525	0	525	0	525	0	525	12.2794	525	0	0
0	525	0	525	0	525	0	525	0	525	0	525	0	525	0	525	0	525	0	525	0	525	0	525	0	525	12.2894	525	0	0
0	525	0	525	0	525	0	525	0	525	0	525	0	525	0	525	0	525	0	525	0	525	0	525	0	525	12.2995	525	0	0
0	525	0	525	0	525	0	525	0	525	0	525	0	525	0	525	0	525	0	525	0	525	0	525	0	525	12.3095	525	0	0
0	525	0	525	0	525	0	525	0	525	0	525	0	525	0	525	0	525	0	525	0	525	0	525	0	525	12.3195	525	0	0
0	525	0	525	0	525	0	525	0	525	0	525	0	525	0	525	0	525	0	525	0	525	0	525	0	525	12.3295	525	0	0
0	525	0	525	0	525	0	525	0	525	0	525	0	525	0	525	0	525	0	525	0	525	0	525	0	525	12.3395	525	0	0
0	525	0	525	0	525	0	525	0	525	0	525	0	525	0	525	0	525	0	525	0	525	0	525	0	525	12.3495	525	0	0
0	525	0	525	0	525	0	525	0	525	0	525	0	525	0	525	0	525	0	525	0	525	0	525	0	525	12.3596	525	0	0
0	525	0	525	0	525	0	525	0	525	0	525	0	525	0	525	0	525	0	525	0	525	0	525	0	525	12.3696	525	0	0
0	525	0	525	0	525	0	525	0	525	0	525	0	525	0	525	0	525	0	525	0	525	0	525	0	525	12.3796	525	0	0
0	525	0	525	0	525	0	525	0	525	0	525	0	525	0	525	0	525	0	525	0	525	0	525	0	525	12.3896	525	0	0
0	525	0	525	0	525	0	525	0	525	0	525	0	525	0	525	0	525	0	525	0	525	0	525	0	525	12.3996	525	0	0
0	525	0	525	0	525	0	525	0	525	0	525	0	525	0	525	0	525	0	525	0	525	0	525	0	525	12.4096	525	0	0
0	525	0	525	0	525	0	525	0	525	0	525	0	525	0	525	0	525	0	525	0	525	0	525	0	525	12.4196	525	0	0
0	525	0	525	0	525	0	525	0	525	0	525	0	525	0	525	0	525	0	525	0	525	0	525	0	525	12.4297	525	0	0
0	525	0	525	0	525	0	525	0	525	0	525	0	525	0	525	0	525	0	525	0	525	0	525	0	525	12.4397	525	0	0
0	525	0	525	0	525	0	525	0	525	0	525	0	525	0	525	0	525	0	525	0	525	0	525	0	525	12.4497	525	0	0
0	525	0	525	0	525	0	525	0	525	0	525	0	525	0	525	0	525	0	525	0	525	0	525	0	525	12.4597	525	0	0
0	525	0	525	0	525	0	525	0	525	0	525	0	525	0	525	0	525	0	525	0	525	0	525	0	525	12.4697	525	0	0
0	525	0	525	0	525	0	525	0	525	0	525	0	525	0	525	0	525	0	525	0	525	0	525	0	525	12.4797	525	0	0
0	525	0	525	0	525	0	525	0	525	0	525	0	525	0	525	0	525	0	525	0	525	0	525	0	525	12.4898	525	0	0
0	525	0	525	0	525	0	525	0	525	0	525	0	525	0	525	0	525	0	525	0	525	0	525	0	525	12.4998	525	0	0
0	525	0	525	0	525	0	525	0	525	0	525	0	525	0	525	0	525	0	525	0	525	0	525	0	525	12.5098	525	0	0
0	525	0	525	0	525	0	525	0	525	0	525	0	525	0	525	0	525	0	525	0	525	0	525	0	525	12.5198	525	0	0
0	525	0	525	0	525	0	525	0	525	0	525	0	525	0	525	0	525	0	525	0	525	0	525	0	525	12.5298	525	0	0
0	525	0	525	0	525	0	525	0	525	0	525	0	525	0	525	0	525	0	525	0	525	0	525	0	525	12.5398	525	0	0
0	525	0	525	0	525	0	525	0	525	0	525	0	525	0	525	0	525	0	525	0	525	0	525	0	525	12.5499	525	0	0
0	525	0	525	0	525	0	525	0	525	0	525	0	525	0	525	0	525	0	525	0	525	0	525	0	525	12.5599	525	0	0
0	525	0	525	0	525	0	525	0	525	0	525	0	525	0	525	0	525	0	525	0	525	0	525	0	525	12.5699	525	0	0
0	525	0	525	0	525	0	525	0	525	0	525	0	525	0	525	0	525	0	525	0	525	0	525	0	525	12.5799	525	0	0
0	525	0	525	0	525	0	525	0	525	0	525	0	525	0	525	0	525	0	525	0	525	0	525	0	525	12.5899	525	0	0
0	525	0	525	0	525	0	525	0	525	0	525	0	525	0	525	0	525	0	525	0	525	0	525	0	525	12.5999	525	0	0
0	525	0	525	0	525	0	525	0	525	0	525	0	525	0	525	0	525	0	525	0	525	0	525	0	525	12.6099	525	0	0
0	525	0	525	0	525	0	525	0	525	0	525	0	525	0	525	0	525	0	525	0	525	0	525	0	525	12.62	525	0	0
0	525	0	525	0	525	0	525	0	525	0	525	0	525	0	525	0	525	0	525	0	525	0	525	0	525	12.63	525	0	0
0	525	0	525	0	525	0	525	0	525	0	525	0	525	0	525	0	525	0	525	0	525	0	525	0	525	12.64	525	0	0
0	525	0	525	0	525	0	525	0	525	0	525	0	525	0	525	0	525	0	525	0	525	0	525	0	525	12.65	525	0	0
0	525	0	525	0	525	0	525	0	525	0	525	0	525	0	525	0	525	0	525	0	525	0	525	0	525	12.66	525	0	0
0	525	0	525	0	525	0	525	0	525	0	525	0	525	0	525	0	525	0	525	0	525	0	525	0	525	12.67	525	0	0
0	525	0	525	0	525	0	525	0	525	0	525	0	525	0	525	0	525	0	525	0	525	0	525	0	525	12.6801	525	0	0
0	525	0	525	0	525	0	525	0	525	0	525	0	525	0	525	0	525	0	525	0	525	0	525	0	525	12.6901	525	0	0
0	525	0	525	0	525	0	525	0	525	0	525	0	525	0	525	0	525	0	525	0	525	0	525	0	525	12.7001	525	0	0
0	525	0	525	0	525	0	525	0	525	0	525	0	525	0	525	0	525	0	525	0	525	0	525	0	525	12.7101	525	0	0
0	525	0	525	0	525	0	525	0	525	0	525	0	525	0	525	0	525	0	525	0	525	0	525	0	525	12.7201	525	0	0
0	525	0	525	0	525	0	525	0	525	0	525	0	525	0	525	0	525	0	525	0	525	0	525	0	525	12.7301	525	0	0
0	525	0	525	0	525	0	525	0	525	0	525	0	525	0	525	0	525	0	525	0	525	0	525	0	525	12.7402	525	0	0
0	525	0	525	0	525	0	525	0	525	0	525	0	525	0	525	0	525	0	525	0	525	0	525	0	525	12.7502	525	0	0
0	525	0	525	0	525	0	525	0	525	0	525	0	525	0	525	0	525	0	525	0	525	0	525	0	525	12.7602	525	0	0
0	525	0	525	0	525	0	525	0	525	0	525	0	525	0	525	0	525	0	525	0	525	0	525	0	525	12.7702	525	0	0
0	525	0	525	0	525	0	525	0	525	0	525	0	525	0	525	0	525	0	525	0	525	0	525	0	525	12.7802	525	0	0
0	525	0	525	0	525	0	525	0	525	0	525	0	525	0	525	0	525	0	525	0	525	0	525	0	525	12.7902	525	0	0
0	525	0	525	0	525	0	525	0	525	0	525	0	525	0	525	0	525	0	525	0	525	0	525	0	525	12.8003	525	0	0
0	525	0	525	0	525	0	525	0	525	0	525	0	525	0	525	0	525	0	525	0	525	0	525	0	525	12.8103	525	0	0
0	525	0	525	0	525	0	525	0	525	0	525	0	525	0	525	0	525	0	525	0	525	0	525	0	525	12.8203	525	0	0
0	525	0	525	0	525	0	525	0	525	0	525	0	525	0	525	0	525	0	525	0	525	0	525	0	525	12.8303	525	0	0
0	525	0	525	0	525	0	525	0	525	0	525	0	525	0	525	0	525	0	525	0	525	0	525	0	525	12.8403	525	0	0
0	525	0	525	0	525	0	525	0	525	0	525	0	525	0	525	0	525	0	525	0	525	0	525	0	525	12.8503	525	0	0
0	525	0	525	0	525	0	525	0	525	0	525	0	525	0	525	0	525	0	525	0	525	0	525	0	525	12.8603	525	0	0
0	525	0	525	0	525	0	525	0	525	0	525	0	525	0	525	0	525	0	525	0	525	0	525	0	525	12.8704	525	0	0
0	525	0	525	0	525	0	525	0	525	0	525	0	525	0	525	0	525	0	525	0	525	0	525	0	525	12.8804	525	0	0
0	525	0	525	0	525	0	525	0	525	0	525	0	525	0	525	0	525	0	525	0	525	0	525	0	525	12.8904	525	0	0
0	525	0	525	0	525	0	525	0	525	0	525	0	525	0	525	0	525	0	525	0	525	0	525	0	525	12.9004	525	0	0
0	525	0	525	0	525	0	525	0	525	0	525	0	525	0	525	0	525	0	525	0	525	0	525	0	525	12.9104	525	0	0
0	525	0	525	0	525	0	525	0	525	0	525	0	525	0	525	0	525	0	525	0	525	0	525	0	525	12.9204	525	0	0
0	525	0	525	0	525	0	525	0	525	0	525	0	525	0	525	0	525	0	525	0	525	0	525	0	525	12.9305	525	0	0
0	525	0	525	0	525	0	525	0	525	0	525	0	525	0	525	0	525	0	525	0	525	0	525	0	525	12.9405	525	0	0
0	525	0	525	0	525	0	525	0	525	0	525	0	525	0	525	0	525	0	525	0	525	0	525	0	525	12.9505	525	0	0
0	525	0	525	0	525	0	525	0	525	0	525	0	525	0	525	0	525	0	525	0	525	0	525	0	525	12.9605	525	0	0
0	525	0	525	0	525	0	525	0	525	0	525	0	525	0	525	0	525	0	525	0	525	0	525	0	525	12.9705	525	0	0
0	525	0	525	0	525	0	525	0	525	0	525	0	525	0	525	0	525	0	525	0	525	0	525	0	525	12.9805	525	0	0
0	525	0	525	0	525	0	525	0	525	0	525	0	525	0	525	0	525	0	525	0	525	0	525	0	525	12.9906	525	0	0
0	525	0	525	0	525	0	525	0	525	0	525	0	525	0	525	0	525	0	525	0	525	0	525	0	525	13.0006	525	0	0
0	525	0	525	0	525	0	525	0	525	0	525	0	525	0	525	0	525	0	525	0	525	0	525	0	525	13.0106	525	0	0
0	525	0	525	0	525	0	525	0	525	0	525	0	525	0	525	0	525	0	525	0	525	0	525	0	525	13.0206	525	0	0
0	525	0	525	0	525	0	525	0	525	0	525	0	525	0	525	0	525	0	525	0	525	0	525	0	525	13.0306	525	0	0
0	525	0	525	0	525	0	525	0	525	0	525	0	525	0	525	0	525	0	525	0	525	0	525	0	525	13.0406	525	0	0
0	525	0	525	0	525	0	525	0	525	0	525	0	525	0	525	0	525	0	525	0	525	0	525	0	525	13.0506	525	0	0
0	525	0	525	0	525	0	525	0	525	0	525	0	525	0	525	0	525	0	525	0	525	0	525	0	525	13.0607	525	0	0
0	525	0	525	0	525	0	525	0	525	0	525	0	525	0	525	0	525	0	525	0	525	0	525	0	525	13.0707	525	0	0
0	525	0	525	0	525	0	525	0	525	0	525	0	525	0	525	0	525	0	525	0	525	0	525	0	525	13.0807	525	0	0
0	525	0	525	0	525	0	525	0	525	0	525	0	525	0	525	0	525	0	525	0	525	0	525	0	525	13.0907	525	0	0
0	525	0	525	0	525	0	525	0	525	0	525	0	525	0	525	0	525	0	525	0	525	0	525	0	525	13.1007	525	0	0
0	525	0	525	0	525	0	525	0	525	0	525	0	525	0	525	0	525	0	525	0	525	0	525	0	525	13.1107	525	0	0
0	525	0	525	0	525	0	525	0	525	0	525	0	525	0	525	0	525	0	525	0	525	0	525	0	525	13.1208	525	0	0
0	525	0	525	0	525	0	525	0	525	0	525	0	525	0	525	0	525	0	525	0	525	0	525	0	525	13.1308	525	0	0
0	525	0	525	0	525	0	525	0	525	0	525	0	525	0	525	0	525	0	525	0	525	0	525	0	525	13.1408	525	0	0
0	525	0	525	0	525	0	525	0	525	0	525	0	525	0	525	0	525	0	525	0	525	0	525	0	525	13.1508	525	0	0
0	525	0	525	0	525	0	525	0	525	0	525	0	525	0	525	0	525	0	525	0	525	0	525	0	525	13.1608	525	0	0
0	525	0	525	0	525	0	525	0	525	0	525	0	525	0	525	0	525	0	525	0	525	0	525	0	525	13.1708	525	0	0
0	525	0	525	0	525	0	525	0	525	0	525	0	525	0	525	0	525	0	525	0	525	0	525	0	525	13.1809	525	0	0
0	525	0	525	0	525	0	525	0	525	0	525	0	525	0	525	0	525	0	525	0	525	0	525	0	525	13.1909	525	0	0
0	525	0	525	0	525	0	525	0	525	0	525	0	525	0	525	0	525	0	525	0	525	0	525	0	525	13.2009	525	0	0
0	525	0	525	0	525	0	525	0	525	0	525	0	525	0	525	0	525	0	525	0	525	0	525	0	525	13.2109	525	0	0
0	525	0	525	0	525	0	525	0	525	0	525	0	525	0	525	0	525	0	525	0	525	0	525	0	525	13.2209	525	0	0
0	525	0	525	0	525	0	525	0	525	0	525	0	525	0	525	0	525	0	525	0	525	0	525	0	525	13.2309	525	0	0
0	525	0	525	0	525	0	525	0	525	0	525	0	525	0	525	0	525	0	525	0	525	0	525	0	525	13.2409	525	0	0
0	525	0	525	0	525	0	525	0	525	0	525	0	525	0	525	0	525	0	525	0	525	0	525	0	525	13.251	525	0	0
0	525	0	525	0	525	0	525	0	525	0	525	0	525	0	525	0	525	0	525	0	525	0	525	0	525	13.261	525	0	0
0	525	0	525	0	525	0	525	0	525	0	525	0	525	0	525	0	525	0	525	0	525	0	525	0	525	13.271	525	0	0
0	525	0	525	0	525	0	525	0	525	0	525	0	525	0	525	0	525	0	525	0	525	0	525	0	525	13.281	525	0	0
0	525	0	525	0	525	0	525	0	525	0	525	0	525	0	525	0	525	0	525	0	525	0	525	0	525	13.291	525	0	0
0	525	0	525	0	525	0	525	0	525	0	525	0	525	0	525	0	525	0	525	0	525	0	525	0	525	13.301	525	0	0
0	525	0	525	0	525	0	525	0	525	0	525	0	525	0	525	0	525	0	525	0	525	0	525	0	525	13.3111	525	0	0
0	525	0	525	0	525	0	525	0	525	0	525	0	525	0	525	0	525	0	525	0	525	0	525	0	525	13.3211	525	0	0
0	525	0	525	0	525	0	525	0	525	0	525	0	525	0	525	0	525	0	525	0	525	0	525	0	525	13.3311	525	0	0
0	525	0	525	0	525	0	525	0	525	0	525	0	525	0	525	0	525	0	525	0	525	0	525	0	525	13.3411	525	0	0
0	525	0	525	0	525	0	525	0	525	0	525	0	525	0	525	0	525	0	525	0	525	0	525	0	525	13.3511	525	0	0
0	525	0	525	0	525	0	525	0	525	0	525	0	525	0	525	0	525	0	525	0	525	0	525	0	525	13.3611	525	0	0
0	525	0	525	0	525	0	525	0	525	0	525	0	525	0	525	0	525	0	525	0	525	0	525	0	525	13.3712	525	0	0
0	525	0	525	0	525	0	525	0	525	0	525	0	525	0	525	0	525	0	525	0	525	0	525	0	525	13.3812	525	0	0
0	525	0	525	0	525	0	525	0	525	0	525	0	525	0	525	0	525	0	525	0	525	0	525	0	525	13.3912	525	0	0
0	525	0	525	0	525	0	525	0	525	0	525	0	525	0	525	0	525	0	525	0	525	0	525	0	525	13.4012	525	0	0
0	525	0	525	0	525	0	525	0	525	0	525	0	525	0	525	0	525	0	525	0	525	0	525	0	525	13.4112	525	0	0
0	525	0	525	0	525	0	525	0	525	0	525	0	525	0	525	0	525	0	525	0	525	0	525	0	525	13.4212	525	0	0
0	525	0	525	0	525	0	525	0	525	0	525	0	525	0	525	0	525	0	525	0	525	0	525	0	525	13.4312	525	0	0
0	525	0	525	0	525	0	525	0	525	0	525	0	525	0	525	0	525	0	525	0	525	0	525	0	525	13.4413	525	0	0
0	525	0	525	0	525	0	525	0	525	0	525	0	525	0	525	0	525	0	525	0	525	0	525	0	525	13.4513	525	0	0
0	525	0	525	0	525	0	525	0	525	0	525	0	525	0	525	0	525	0	525	0	525	0	525	0	525	13.4613	525	0	0
0	525	0	525	0	525	0	525	0	525	0	525	0	525	0	525	0	525	0	525	0	525	0	525	0	525	13.4713	525	0	0
0	525	0	525	0	525	0	525	0	525	0	525	0	525	0	525	0	525	0	525	0	525	0	525	0	525	13.4813	525	0	0
0	525	0	525	0	525	0	525	0	525	0	525	0	525	0	525	0	525	0	525	0	525	0	525	0	525	13.4913	525	0	0
0	525	0	525	0	525	0	525	0	525	0	525	0	525	0	525	0	525	0	525	0	525	0	525	0	525	13.5014	525	0	0
0	525	0	525	0	525	0	525	0	525	0	525	0	525	0	525	0	525	0	525	0	525	0	525	0	525	13.5114	525	0	0
0	525	0	525	0	525	0	525	0	525	0	525	0	525	0	525	0	525	0	525	0	525	0	525	0	525	13.5214	525	0	0
0	525	0	525	0	525	0	525	0	525	0	525	0	525	0	525	0	525	0	525	0	525	0	525	0	525	13.5314	525	0	0
0	525	0	525	0	525	0	525	0	525	0	525	0	525	0	525	0	525	0	525	0	525	0	525	0	525	13.5414	525	0	0
0	525	0	525	0	525	0	525	0	525	0	525	0	525	0	525	0	525	0	525	0	525	0	525	0	525	13.5514	525	0	0
0	525	0	525	0	525	0	525	0	525	0	525	0	525	0	525	0	525	0	525	0	525	0	525	0	525	13.5615	525	0	0
0	525	0	525	0	525	0	525	0	525	0	525	0	525	0	525	0	525	0	525	0	525	0	525	0	525	13.5715	525	0	0
0	525	0	525	0	525	0	525	0	525	0	525	0	525	0	525	0	525	0	525	0	525	0	525	0	525	13.5815	525	0	0
0	525	0	525	0	525	0	525	0	525	0	525	0	525	0	525	0	525	0	525	0	525	0	525	0	525	13.5915	525	0	0
0	525	0	525	0	525	0	525	0	525	0	525	0	525	0	525	0	525	0	525	0	525	0	525	0	525	13.6015	525	0	0
0	525	0	525	0	525	0	525	0	525	0	525	0	525	0	525	0	525	0	525	0	525	0	525	0	525	13.6115	525	0	0
0	525	0	525	0	525	0	525	0	525	0	525	0	525	0	525	0	525	0	525	0	525	0	525	0	525	13.6216	525	0	0
0	525	0	525	0	525	0	525	0	525	0	525	0	525	0	525	0	525	0	525	0	525	0	525	0	525	13.6316	525	0	0
0	525	0	525	0	525	0	525	0	525	0	525	0	525	0	525	0	525	0	525	0	525	0	525	0	525	13.6416	525	0	0
0	525	0	525	0	525	0	525	0	525	0	525	0	525	0	525	0	525	0	525	0	525	0	525	0	525	13.6516	525	0	0
0	525	0	525	0	525	0	525	0	525	0	525	0	525	0	525	0	525	0	525	0	525	0	525	0	525	13.6616	525	0	0
0	525	0	525	0	525	0	525	0	525	0	525	0	525	0	525	0	525	0	525	0	525	0	525	0	525	13.6716	525	0	0
0	525	0	525	0	525	0	525	0	525	0	525	0	525	0	525	0	525	0	525	0	525	0	525	0	525	13.6816	525	0	0
0	525	0	525	0	525	0	525	0	525	0	525	0	525	0	525	0	525	0	525	0	525	0	525	0	525	13.6917	525	0	0
0	525	0	525	0	525	0	525	0	525	0	525	0	525	0	525	0	525	0	525	0	525	0	525	0	525	13.7017	525	0	0
0	525	0	525	0	525	0	525	0	525	0	525	0	525	0	525	0	525	0	525	0	525	0	525	0	525	13.7117	525	0	0
0	525	0	525	0	525	0	525	0	525	0	525	0	525	0	525	0	525	0	525	0	525	0	525	0	525	13.7217	525	0	0
0	525	0	525	0	525	0	525	0	525	0	525	0	525	0	525	0	525	0	525	0	525	0	525	0	525	13.7317	525	0	0
0	525	0	525	0	525	0	525	0	525	0	525	0	525	0	525	0	525	0	525	0	525	0	525	0	525	13.7417	525	0	0
0	525	0	525	0	525	0	525	0	525	0	525	0	525	0	525	0	525	0	525	0	525	0	525	0	525	13.7518	525	0	0
0	525	0	525	0	525	0	525	0	525	0	525	0	525	0	525	0	525	0	525	0	525	0	525	0	525	13.7618	525	0	0
0	525	0	525	0	525	0	525	0	525	0	525	0	525	0	525	0	525	0	525	0	525	0	525	0	525	13.7718	525	0	0
0	525	0	525	0	525	0	525	0	525	0	525	0	525	0	525	0	525	0	525	0	525	0	525	0	525	13.7818	525	0	0
0	525	0	525	0	525	0	525	0	525	0	525	0	525	0	525	0	525	0	525	0	525	0	525	0	525	13.7918	525	0	0
0	525	0	525	0	525	0	525	0	525	0	525	0	525	0	525	0	525	0	525	0	525	0	525	0	525	13.8018	525	0	0
0	525	0	525	0	525	0	525	0	525	0	525	0	525	0	525	0	525	0	525	0	525	0	525	0	525	13.8119	525	0	0
0	525	0	525	0	525	0	525	0	525	0	525	0	525	0	525	0	525	0	525	0	525	0	525	0	525	13.8219	525	0	0
0	525	0	525	0	525	0	525	0	525	0	525	0	525	0	525	0	525	0	525	0	525	0	525	0	525	13.8319	525	0	0
0	525	0	525	0	525	0	525	0	525	0	525	0	525	0	525	0	525	0	525	0	525	0	525	0	525	13.8419	525	0	0
0	525	0	525	0	525	0	525	0	525	0	525	0	525	0	525	0	525	0	525	0	525	0	525	0	525	13.8519	525	0	0
0	525	0	525	0	525	0	525	0	525	0	525	0	525	0	525	0	525	0	525	0	525	0	525	0	525	13.8619	525	0	0
0	525	0	525	0	525	0	525	0	525	0	525	0	525	0	525	0	525	0	525	0	525	0	525	0	525	13.8719	525	0	0
0	525	0	525	0	525	0	525	0	525	0	525	0	525	0	525	0	525	0	525	0	525	0	525	0	525	13.882	525	0	0
0	525	0	525	0	525	0	525	0	525	0	525	0	525	0	525	0	525	0	525	0	525	0	525	0	525	13.892	525	0	0
0	525	0	525	0	525	0	525	0	525	0	525	0	525	0	525	0	525	0	525	0	525	0	525	0	525	13.902	525	0	0
0	525	0	525	0	525	0	525	0	525	0	525	0	525	0	525	0	525	0	525	0	525	0	525	0	525	13.912	525	0	0
0	525	0	525	0	525	0	525	0	525	0	525	0	525	0	525	0	525	0	525	0	525	0	525	0	525	13.922	525	0	0
0	525	0	525	0	525	0	525	0	525	0	525	0	525	0	525	0	525	0	525	0	525	0	525	0	525	13.932	525	0	0
0	525	0	525	0	525	0	525	0	525	0	525	0	525	0	525	0	525	0	525	0	525	0	525	0	525	13.9421	525	0	0
0	525	0	525	0	525	0	525	0	525	0	525	0	525	0	525	0	525	0	525	0	525	0	525	0	525	13.9521	525	0	0
0	525	0	525	0	525	0	525	0	525	0	525	0	525	0	525	0	525	0	525	0	525	0	525	0	525	13.9621	525	0	0
0	525	0	525	0	525	0	525	0	525	0	525	0	525	0	525	0	525	0	525	0	525	0	525	0	525	13.9721	525	0	0
0	525	0	525	0	525	0	525	0	525	0	525	0	525	0	525	0	525	0	525	0	525	0	525	0	525	13.9821	525	0	0
0	525	0	525	0	525	0	525	0	525	0	525	0	525	0	525	0	525	0	525	0	525	0	525	0	525	13.9921	525	0	0
0	525	0	525	0	525	0	525	0	525	0	525	0	525	0	525	0	525	0	525	0	525	0	525	0	525	14.0022	525	0	0
0	525	0	525	0	525	0	525	0	525	0	525	0	525	0	525	0	525	0	525	0	525	0	525	0	525	14.0122	525	0	0
0	525	0	525	0	525	0	525	0	525	0	525	0	525	0	525	0	525	0	525	0	525	0	525	0	525	14.0222	525	0	0
0	525	0	525	0	525	0	525	0	525	0	525	0	525	0	525	0	525	0	525	0	525	0	525	0	525	14.0322	525	0	0
0	525	0	525	0	525	0	525	0	525	0	525	0	525	0	525	0	525	0	525	0	525	0	525	0	525	14.0422	525	0	0
0	525	0	525	0	525	0	525	0	525	0	525	0	525	0	525	0	525	0	525	0	525	0	525	0	525	14.0522	525	0	0
0	525	0	525	0	525	0	525	0	525	0	525	0	525	0	525	0	525	0	525	0	525	0	525	0	525	14.0622	525	0	0
0	525	0	525	0	525	0	525	0	525	0	525	0	525	0	525	0	525	0	525	0	525	0	525	0	525	14.0723	525	0	0
0	525	0	525	0	525	0	525	0	525	0	525	0	525	0	525	0	525	0	525	0	525	0	525	0	525	14.0823	525	0	0
0	525	0	525	0	525	0	525	0	525	0	525	0	525	0	525	0	525	0	525	0	525	0	525	0	525	14.0923	525	0	0
0	525	0	525	0	525	0	525	0	525	0	525	0	525	0	525	0	525	0	525	0	525	0	525	0	525	14.1023	525	0	0
0	525	0	525	0	525	0	525	0	525	0	525	0	525	0	525	0	525	0	525	0	525	0	525	0	525	14.1123	525	0	0
0	525	0	525	0	525	0	525	0	525	0	525	0	525	0	525	0	525	0	525	0	525	0	525	0	525	14.1223	525	0	0
0	525	0	525	0	525	0	525	0	525	0	525	0	525	0	525	0	525	0	525	0	525	0	525	0	525	14.1324	525	0	0
0	525	0	525	0	525	0	525	0	525	0	525	0	525	0	525	0	525	0	525	0	525	0	525	0	525	14.1424	525	0	0
0	525	0	525	0	525	0	525	0	525	0	525	0	525	0	525	0	525	0	525	0	525	0	525	0	525	14.1524	525	0	0
0	525	0	525	0	525	0	525	0	525	0	525	0	525	0	525	0	525	0	525	0	525	0	525	0	525	14.1624	525	0	0
0	525	0	525	0	525	0	525	0	525	0	525	0	525	0	525	0	525	0	525	0	525	0	525	0	525	14.1724	525	0	0
0	525	0	525	0	525	0	525	0	525	0	525	0	525	0	525	0	525	0	525	0	525	0	525	0	525	14.1824	525	0	0
0	525	0	525	0	525	0	525	0	525	0	525	0	525	0	525	0	525	0	525	0	525	0	525	0	525	14.1925	525	0	0
0	525	0	525	0	525	0	525	0	525	0	525	0	525	0	525	0	525	0	525	0	525	0	525	0	525	14.2025	525	0	0
0	525	0	525	0	525	0	525	0	525	0	525	0	525	0	525	0	525	0	525	0	525	0	525	0	525	14.2125	525	0	0
0	525	0	525	0	525	0	525	0	525	0	525	0	525	0	525	0	525	0	525	0	525	0	525	0	525	14.2225	525	0	0
0	525	0	525	0	525	0	525	0	525	0	525	0	525	0	525	0	525	0	525	0	525	0	525	0	525	14.2325	525	0	0
0	525	0	525	0	525	0	525	0	525	0	525	0	525	0	525	0	525	0	525	0	525	0	525	0	525	14.2425	525	0	0
0	525	0	525	0	525	0	525	0	525	0	525	0	525	0	525	0	525	0	525	0	525	0	525	0	525	14.2525	525	0	0
0	525	0	525	0	525	0	525	0	525	0	525	0	525	0	525	0	525	0	525	0	525	0	525	0	525	14.2626	525	0	0
0	525	0	525	0	525	0	525	0	525	0	525	0	525	0	525	0	525	0	525	0	525	0	525	0	525	14.2726	525	0	0
0	525	0	525	0	525	0	525	0	525	0	525	0	525	0	525	0	525	0	525	0	525	0	525	0	525	14.2826	525	0	0
0	525	0	525	0	525	0	525	0	525	0	525	0	525	0	525	0	525	0	525	0	525	0	525	0	525	14.2926	525	0	0
0	525	0	525	0	525	0	525	0	525	0	525	0	525	0	525	0	525	0	525	0	525	0	525	0	525	14.3026	525	0	0
0	525	0	525	0	525	0	525	0	525	0	525	0	525	0	525	0	525	0	525	0	525	0	525	0	525	14.3126	525	0	0
0	525	0	525	0	525	0	525	0	525	0	525	0	525	0	525	0	525	0	525	0	525	0	525	0	525	14.3227	525	0	0
0	525	0	525	0	525	0	525	0	525	0	525	0	525	0	525	0	525	0	525	0	525	0	525	0	525	14.3327	525	0	0
0	525	0	525	0	525	0	525	0	525	0	525	0	525	0	525	0	525	0	525	0	525	0	525	0	525	14.3427	525	0	0
0	525	0	525	0	525	0	525	0	525	0	525	0	525	0	525	0	525	0	525	0	525	0	525	0	525	14.3527	525	0	0
0	525	0	525	0	525	0	525	0	525	0	525	0	525	0	525	0	525	0	525	0	525	0	525	0	525	14.3627	525	0	0
0	525	0	525	0	525	0	525	0	525	0	525	0	525	0	525	0	525	0	525	0	525	0	525	0	525	14.3727	525	0	0
0	525	0	525	0	525	0	525	0	525	0	525	0	525	0	525	0	525	0	525	0	525	0	525	0	525	14.3828	525	0	0
0	525	0	525	0	525	0	525	0	525	0	525	0	525	0	525	0	525	0	525	0	525	0	525	0	525	14.3928	525	0	0
0	525	0	525	0	525	0	525	0	525	0	525	0	525	0	525	0	525	0	525	0	525	0	525	0	525	14.4028	525	0	0
0	525	0	525	0	525	0	525	0	525	0	525	0	525	0	525	0	525	0	525	0	525	0	525	0	525	14.4128	525	0	0
0	525	0	525	0	525	0	525	0	525	0	525	0	525	0	525	0	525	0	525	0	525	0	525	0	525	14.4228	525	0	0
0	525	0	525	0	525	0	525	0	525	0	525	0	525	0	525	0	525	0	525	0	525	0	525	0	525	14.4328	525	0	0
0	525	0	525	0	525	0	525	0	525	0	525	0	525	0	525	0	525	0	525	0	525	0	525	0	525	14.4428	525	0	0
0	525	0	525	0	525	0	525	0	525	0	525	0	525	0	525	0	525	0	525	0	525	0	525	0	525	14.4529	525	0	0
0	525	0	525	0	525	0	525	0	525	0	525	0	525	0	525	0	525	0	525	0	525	0	525	0	525	14.4629	525	0	0
0	525	0	525	0	525	0	525	0	525	0	525	0	525	0	525	0	525	0	525	0	525	0	525	0	525	14.4729	525	0	0
0	525	0	525	0	525	0	525	0	525	0	525	0	525	0	525	0	525	0	525	0	525	0	525	0	525	14.4829	525	0	0
0	525	0	525	0	525	0	525	0	525	0	525	0	525	0	525	0	525	0	525	0	525	0	525	0	525	14.4929	525	0	0
0	525	0	525	0	525	0	525	0	525	0	525	0	525	0	525	0	525	0	525	0	525	0	525	0	525	14.5029	525	0	0
0	525	0	525	0	525	0	525	0	525	0	525	0	525	0	525	0	525	0	525	0	525	0	525	0	525	14.513	525	0	0
0	525	0	525	0	525	0	525	0	525	0	525	0	525	0	525	0	525	0	525	0	525	0	525	0	525	14.523	525	0	0
0	525	0	525	0	525	0	525	0	525	0	525	0	525	0	525	0	525	0	525	0	525	0	525	0	525	14.533	525	0	0
0	525	0	525	0	525	0	525	0	525	0	525	0	525	0	525	0	525	0	525	0	525	0	525	0	525	14.543	525	0	0
0	525	0	525	0	525	0	525	0	525	0	525	0	525	0	525	0	525	0	525	0	525	0	525	0	525	14.553	525	0	0
0	525	0	525	0	525	0	525	0	525	0	525	0	525	0	525	0	525	0	525	0	525	0	525	0	525	14.563	525	0	0
0	525	0	525	0	525	0	525	0	525	0	525	0	525	0	525	0	525	0	525	0	525	0	525	0	525	14.5731	525	0	0
0	525	0	525	0	525	0	525	0	525	0	525	0	525	0	525	0	525	0	525	0	525	0	525	0	525	14.5831	525	0	0
0	525	0	525	0	525	0	525	0	525	0	525	0	525	0	525	0	525	0	525	0	525	0	525	0	525	14.5931	525	0	0
0	525	0	525	0	525	0	525	0	525	0	525	0	525	0	525	0	525	0	525	0	525	0	525	0	525	14.6031	525	0	0
0	525	0	525	0	525	0	525	0	525	0	525	0	525	0	525	0	525	0	525	0	525	0	525	0	525	14.6131	525	0	0
0	525	0	525	0	525	0	525	0	525	0	525	0	525	0	525	0	525	0	525	0	525	0	525	0	525	14.6231	525	0	0
0	525	0	525	0	525	0	525	0	525	0	525	0	525	0	525	0	525	0	525	0	525	0	525	0	525	14.6332	525	0	0
0	525	0	525	0	525	0	525	0	525	0	525	0	525	0	525	0	525	0	525	0	525	0	525	0	525	14.6432	525	0	0
0	525	0	525	0	525	0	525	0	525	0	525	0	525	0	525	0	525	0	525	0	525	0	525	0	525	14.6532	525	0	0
0	525	0	525	0	525	0	525	0	525	0	525	0	525	0	525	0	525	0	525	0	525	0	525	0	525	14.6632	525	0	0
0	525	0	525	0	525	0	525	0	525	0	525	0	525	0	525	0	525	0	525	0	525	0	525	0	525	14.6732	525	0	0
0	525	0	525	0	525	0	525	0	525	0	525	0	525	0	525	0	525	0	525	0	525	0	525	0	525	14.6832	525	0	0
0	525	0	525	0	525	0	525	0	525	0	525	0	525	0	525	0	525	0	525	0	525	0	525	0	525	14.6932	525	0	0
0	525	0	525	0	525	0	525	0	525	0	525	0	525	0	525	0	525	0	525	0	525	0	525	0	525	14.7033	525	0	0
0	525	0	525	0	525	0	525	0	525	0	525	0	525	0	525	0	525	0	525	0	525	0	525	0	525	14.7133	525	0	0
0	525	0	525	0	525	0	525	0	525	0	525	0	525	0	525	0	525	0	525	0	525	0	525	0	525	14.7233	525	0	0
0	525	0	525	0	525	0	525	0	525	0	525	0	525	0	525	0	525	0	525	0	525	0	525	0	525	14.7333	525	0	0
0	525	0	525	0	525	0	525	0	525	0	525	0	525	0	525	0	525	0	525	0	525	0	525	0	525	14.7433	525	0	0
0	525	0	525	0	525	0	525	0	525	0	525	0	525	0	525	0	525	0	525	0	525	0	525	0	525	14.7533	525	0	0
0	525	0	525	0	525	0	525	0	525	0	525	0	525	0	525	0	525	0	525	0	525	0	525	0	525	14.7634	525	0	0
0	525	0	525	0	525	0	525	0	525	0	525	0	525	0	525	0	525	0	525	0	525	0	525	0	525	14.7734	525	0	0
0	525	0	525	0	525	0	525	0	525	0	525	0	525	0	525	0	525	0	525	0	525	0	525	0	525	14.7834	525	0	0
0	525	0	525	0	525	0	525	0	525	0	525	0	525	0	525	0	525	0	525	0	525	0	525	0	525	14.7934	525	0	0
0	525	0	525	0	525	0	525	0	525	0	525	0	525	0	525	0	525	0	525	0	525	0	525	0	525	14.8034	525	0	0
0	525	0	525	0	525	0	525	0	525	0	525	0	525	0	525	0	525	0	525	0	525	0	525	0	525	14.8134	525	0	0
0	525	0	525	0	525	0	525	0	525	0	525	0	525	0	525	0	525	0	525	0	525	0	525	0	525	14.8235	525	0	0
0	525	0	525	0	525	0	525	0	525	0	525	0	525	0	525	0	525	0	525	0	525	0	525	0	525	14.8335	525	0	0
0	525	0	525	0	525	0	525	0	525	0	525	0	525	0	525	0	525	0	525	0	525	0	525	0	525	14.8435	525	0	0
0	525	0	525	0	525	0	525	0	525	0	525	0	525	0	525	0	525	0	525	0	525	0	525	0	525	14.8535	525	0	0
0	525	0	525	0	525	0	525	0	525	0	525	0	525	0	525	0	525	0	525	0	525	0	525	0	525	14.8635	525	0	0
0	525	0	525	0	525	0	525	0	525	0	525	0	525	0	525	0	525	0	525	0	525	0	525	0	525	14.8735	525	0	0
0	525	0	525	0	525	0	525	0	525	0	525	0	525	0	525	0	525	0	525	0	525	0	525	0	525	14.8835	525	0	0
0	525	0	525	0	525	0	525	0	525	0	525	0	525	0	525	0	525	0	525	0	525	0	525	0	525	14.8936	525	0	0
0	525	0	525	0	525	0	525	0	525	0	525	0	525	0	525	0	525	0	525	0	525	0	525	0	525	14.9036	525	0	0
0	525	0	525	0	525	0	525	0	525	0	525	0	525	0	525	0	525	0	525	0	525	0	525	0	525	14.9136	525	0	0
0	525	0	525	0	525	0	525	0	525	0	525	0	525	0	525	0	525	0	525	0	525	0	525	0	525	14.9236	525	0	0
0	525	0	525	0	525	0	525	0	525	0	525	0	525	0	525	0	525	0	525	0	525	0	525	0	525	14.9336	525	0	0
0	525	0	525	0	525	0	525	0	525	0	525	0	525	0	525	0	525	0	525	0	525	0	525	0	525	14.9436	525	0	0
0	525	0	525	0	525	0	525	0	525	0	525	0	525	0	525	0	525	0	525	0	525	0	525	0	525	14.9537	525	0	0
0	525	0	525	0	525	0	525	0	525	0	525	0	525	0	525	0	525	0	525	0	525	0	525	0	525	14.9637	525	0	0
0	525	0	525	0	525	0	525	0	525	0	525	0	525	0	525	0	525	0	525	0	525	0	525	0	525	14.9737	525	0	0
0	525	0	525	0	525	0	525	0	525	0	525	0	525	0	525	0	525	0	525	0	525	0	525	0	525	14.9837	525	0	0
0	525	0	525	0	525	0	525	0	525	0	525	0	525	0	525	0	525	0	525	0	525	0	525	0	525	14.9937	525	0	0
0	525	0	525	0	525	0	525	0	525	0	525	0	525	0	525	0	525	0	525	0	525	0	525	0	525	15.0037	525	0	0
0	525	0	525	0	525	0	525	0	525	0	525	0	525	0	525	0	525	0	525	0	525	0	525	0	525	15.0138	525	0	0
0	525	0	525	0	525	0	525	0	525	0	525	0	525	0	525	0	525	0	525	0	525	0	525	0	525	15.0238	525	0	0
0	525	0	525	0	525	0	525	0	525	0	525	0	525	0	525	0	525	0	525	0	525	0	525	0	525	15.0338	525	0	0
0	525	0	525	0	525	0	525	0	525	0	525	0	525	0	525	0	525	0	525	0	525	0	525	0	525	15.0438	525	0	0
0	525	0	525	0	525	0	525	0	525	0	525	0	525	0	525	0	525	0	525	0	525	0	525	0	525	15.0538	525	0	0
0	525	0	525	0	525	0	525	0	525	0	525	0	525	0	525	0	525	0	525	0	525	0	525	0	525	15.0638	525	0	0
0	525	0	525	0	525	0	525	0	525	0	525	0	525	0	525	0	525	0	525	0	525	0	525	0	525	15.0738	525	0	0
0	525	0	525	0	525	0	525	0	525	0	525	0	525	0	525	0	525	0	525	0	525	0	525	0	525	15.0839	525	0	0
0	525	0	525	0	525	0	525	0	525	0	525	0	525	0	525	0	525	0	525	0	525	0	525	0	525	15.0939	525	0	0
0	525	0	525	0	525	0	525	0	525	0	525	0	525	0	525	0	525	0	525	0	525	0	525	0	525	15.1039	525	0	0
0	525	0	525	0	525	0	525	0	525	0	525	0	525	0	525	0	525	0	525	0	525	0	525	0	525	15.1139	525	0	0
0	525	0	525	0	525	0	525	0	525	0	525	0	525	0	525	0	525	0	525	0	525	0	525	0	525	15.1239	525	0	0
0	525	0	525	0	525	0	525	0	525	0	525	0	525	0	525	0	525	0	525	0	525	0	525	0	525	15.1339	525	0	0
0	525	0	525	0	525	0	525	0	525	0	525	0	525	0	525	0	525	0	525	0	525	0	525	0	525	15.144	525	0	0
0	525	0	525	0	525	0	525	0	525	0	525	0	525	0	525	0	525	0	525	0	525	0	525	0	525	15.154	525	0	0
0	525	0	525	0	525	0	525	0	525	0	525	0	525	0	525	0	525	0	525	0	525	0	525	0	525	15.164	525	0	0
0	525	0	525	0	525	0	525	0	525	0	525	0	525	0	525	0	525	0	525	0	525	0	525	0	525	15.174	525	0	0
0	525	0	525	0	525	0	525	0	525	0	525	0	525	0	525	0	525	0	525	0	525	0	525	0	525	15.184	525	0	0
0	525	0	525	0	525	0	525	0	525	0	525	0	525	0	525	0	525	0	525	0	525	0	525	0	525	15.194	525	0	0
0	525	0	525	0	525	0	525	0	525	0	525	0	525	0	525	0	525	0	525	0	525	0	525	0	525	15.2041	525	0	0
0	525	0	525	0	525	0	525	0	525	0	525	0	525	0	525	0	525	0	525	0	525	0	525	0	525	15.2141	525	0	0
0	525	0	525	0	525	0	525	0	525	0	525	0	525	0	525	0	525	0	525	0	525	0	525	0	525	15.2241	525	0	0
0	525	0	525	0	525	0	525	0	525	0	525	0	525	0	525	0	525	0	525	0	525	0	525	0	525	15.2341	525	0	0
0	525	0	525	0	525	0	525	0	525	0	525	0	525	0	525	0	525	0	525	0	525	0	525	0	525	15.2441	525	0	0
0	525	0	525	0	525	0	525	0	525	0	525	0	525	0	525	0	525	0	525	0	525	0	525	0	525	15.2541	525	0	0
0	525	0	525	0	525	0	525	0	525	0	525	0	525	0	525	0	525	0	525	0	525	0	525	0	525	15.2641	525	0	0
0	525	0	525	0	525	0	525	0	525	0	525	0	525	0	525	0	525	0	525	0	525	0	525	0	525	15.2742	525	0	0
0	525	0	525	0	525	0	525	0	525	0	525	0	525	0	525	0	525	0	525	0	525	0	525	0	525	15.2842	525	0	0
0	525	0	525	0	525	0	525	0	525	0	525	0	525	0	525	0	525	0	525	0	525	0	525	0	525	15.2942	525	0	0
0	525	0	525	0	525	0	525	0	525	0	525	0	525	0	525	0	525	0	525	0	525	0	525	0	525	15.3042	525	0	0
0	525	0	525	0	525	0	525	0	525	0	525	0	525	0	525	0	525	0	525	0	525	0	525	0	525	15.3142	525	0	0
0	525	0	525	0	525	0	525	0	525	0	525	0	525	0	525	0	525	0	525	0	525	0	525	0	525	15.3242	525	0	0
0	525	0	525	0	525	0	525	0	525	0	525	0	525	0	525	0	525	0	525	0	525	0	525	0	525	15.3343	525	0	0
0	525	0	525	0	525	0	525	0	525	0	525	0	525	0	525	0	525	0	525	0	525	0	525	0	525	15.3443	525	0	0
0	525	0	525	0	525	0	525	0	525	0	525	0	525	0	525	0	525	0	525	0	525	0	525	0	525	15.3543	525	0	0
0	525	0	525	0	525	0	525	0	525	0	525	0	525	0	525	0	525	0	525	0	525	0	525	0	525	15.3643	525	0	0
0	525	0	525	0	525	0	525	0	525	0	525	0	525	0	525	0	525	0	525	0	525	0	525	0	525	15.3743	525	0	0
0	525	0	525	0	525	0	525	0	525	0	525	0	525	0	525	0	525	0	525	0	525	0	525	0	525	15.3843	525	0	0
0	525	0	525	0	525	0	525	0	525	0	525	0	525	0	525	0	525	0	525	0	525	0	525	0	525	15.3944	525	0	0
0	525	0	525	0	525	0	525	0	525	0	525	0	525	0	525	0	525	0	525	0	525	0	525	0	525	15.4044	525	0	0
0	525	0	525	0	525	0	525	0	525	0	525	0	525	0	525	0	525	0	525	0	525	0	525	0	525	15.4144	525	0	0
0	525	0	525	0	525	0	525	0	525	0	525	0	525	0	525	0	525	0	525	0	525	0	525	0	525	15.4244	525	0	0
0	525	0	525	0	525	0	525	0	525	0	525	0	525	0	525	0	525	0	525	0	525	0	525	0	525	15.4344	525	0	0
0	525	0	525	0	525	0	525	0	525	0	525	0	525	0	525	0	525	0	525	0	525	0	525	0	525	15.4444	525	0	0
0	525	0	525	0	525	0	525	0	525	0	525	0	525	0	525	0	525	0	525	0	525	0	525	0	525	15.4545	525	0	0
0	525	0	525	0	525	0	525	0	525	0	525	0	525	0	525	0	525	0	525	0	525	0	525	0	525	15.4645	525	0	0
0	525	0	525	0	525	0	525	0	525	0	525	0	525	0	525	0	525	0	525	0	525	0	525	0	525	15.4745	525	0	0
0	525	0	525	0	525	0	525	0	525	0	525	0	525	0	525	0	525	0	525	0	525	0	525	0	525	15.4845	525	0	0
0	525	0	525	0	525	0	525	0	525	0	525	0	525	0	525	0	525	0	525	0	525	0	525	0	525	15.4945	525	0	0
0	525	0	525	0	525	0	525	0	525	0	525	0	525	0	525	0	525	0	525	0	525	0	525	0	525	15.5045	525	0	0
0	525	0	525	0	525	0	525	0	525	0	525	0	525	0	525	0	525	0	525	0	525	0	525	0	525	15.5145	525	0	0
0	525	0	525	0	525	0	525	0	525	0	525	0	525	0	525	0	525	0	525	0	525	0	525	0	525	15.5246	525	0	0
0	525	0	525	0	525	0	525	0	525	0	525	0	525	0	525	0	525	0	525	0	525	0	525	0	525	15.5346	525	0	0
0	525	0	525	0	525	0	525	0	525	0	525	0	525	0	525	0	525	0	525	0	525	0	525	0	525	15.5446	525	0	0
0	525	0	525	0	525	0	525	0	525	0	525	0	525	0	525	0	525	0	525	0	525	0	525	0	525	15.5546	525	0	0
0	525	0	525	0	525	0	525	0	525	0	525	0	525	0	525	0	525	0	525	0	525	0	525	0	525	15.5646	525	0	0
0	525	0	525	0	525	0	525	0	525	0	525	0	525	0	525	0	525	0	525	0	525	0	525	0	525	15.5746	525	0	0
0	525	0	525	0	525	0	525	0	525	0	525	0	525	0	525	0	525	0	525	0	525	0	525	0	525	15.5847	525	0	0
0	525	0	525	0	525	0	525	0	525	0	525	0	525	0	525	0	525	0	525	0	525	0	525	0	525	15.5947	525	0	0
0	525	0	525	0	525	0	525	0	525	0	525	0	525	0	525	0	525	0	525	0	525	0	525	0	525	15.6047	525	0	0
0	525	0	525	0	525	0	525	0	525	0	525	0	525	0	525	0	525	0	525	0	525	0	525	0	525	15.6147	525	0	0
0	525	0	525	0	525	0	525	0	525	0	525	0	525	0	525	0	525	0	525	0	525	0	525	0	525	15.6247	525	0	0
0	525	0	525	0	525	0	525	0	525	0	525	0	525	0	525	0	525	0	525	0	525	0	525	0	525	15.6347	525	0	0
0	525	0	525	0	525	0	525	0	525	0	525	0	525	0	525	0	525	0	525	0	525	0	525	0	525	15.6448	525	0	0
0	525	0	525	0	525	0	525	0	525	0	525	0	525	0	525	0	525	0	525	0	525	0	525	0	525	15.6548	525	0	0
0	525	0	525	0	525	0	525	0	525	0	525	0	525	0	525	0	525	0	525	0	525	0	525	0	525	15.6648	525	0	0
0	525	0	525	0	525	0	525	0	525	0	525	0	525	0	525	0	525	0	525	0	525	0	525	0	525	15.6748	525	0	0
0	525	0	525	0	525	0	525	0	525	0	525	0	525	0	525	0	525	0	525	0	525	0	525	0	525	15.6848	525	0	0
0	525	0	525	0	525	0	525	0	525	0	525	0	525	0	525	0	525	0	525	0	525	0	525	0	525	15.6948	525	0	0
0	525	0	525	0	525	0	525	0	525	0	525	0	525	0	525	0	525	0	525	0	525	0	525	0	525	15.7048	525	0	0
0	525	0	525	0	525	0	525	0	525	0	525	0	525	0	525	0	525	0	525	0	525	0	525	0	525	15.7149	525	0	0
0	525	0	525	0	525	0	525	0	525	0	525	0	525	0	525	0	525	0	525	0	525	0	525	0	525	15.7249	525	0	0
0	525	0	525	0	525	0	525	0	525	0	525	0	525	0	525	0	525	0	525	0	525	0	525	0	525	15.7349	525	0	0
0	525	0	525	0	525	0	525	0	525	0	525	0	525	0	525	0	525	0	525	0	525	0	525	0	525	15.7449	525	0	0
0	525	0	525	0	525	0	525	0	525	0	525	0	525	0	525	0	525	0	525	0	525	0	525	0	525	15.7549	525	0	0
0	525	0	525	0	525	0	525	0	525	0	525	0	525	0	525	0	525	0	525	0	525	0	525	0	525	15.7649	525	0	0
0	525	0	525	0	525	0	525	0	525	0	525	0	525	0	525	0	525	0	525	0	525	0	525	0	525	15.775	525	0	0
0	525	0	525	0	525	0	525	0	525	0	525	0	525	0	525	0	525	0	525	0	525	0	525	0	525	15.785	525	0	0
0	525	0	525	0	525	0	525	0	525	0	525	0	525	0	525	0	525	0	525	0	525	0	525	0	525	15.795	525	0	0
0	525	0	525	0	525	0	525	0	525	0	525	0	525	0	525	0	525	0	525	0	525	0	525	0	525	15.805	525	0	0
0	525	0	525	0	525	0	525	0	525	0	525	0	525	0	525	0	525	0	525	0	525	0	525	0	525	15.815	525	0	0
0	525	0	525	0	525	0	525	0	525	0	525	0	525	0	525	0	525	0	525	0	525	0	525	0	525	15.825	525	0	0
0	525	0	525	0	525	0	525	0	525	0	525	0	525	0	525	0	525	0	525	0	525	0	525	0	525	15.8351	525	0	0
0	525	0	525	0	525	0	525	0	525	0	525	0	525	0	525	0	525	0	525	0	525	0	525	0	525	15.8451	525	0	0
0	525	0	525	0	525	0	525	0	525	0	525	0	525	0	525	0	525	0	525	0	525	0	525	0	525	15.8551	525	0	0
0	525	0	525	0	525	0	525	0	525	0	525	0	525	0	525	0	525	0	525	0	525	0	525	0	525	15.8651	525	0	0
0	525	0	525	0	525	0	525	0	525	0	525	0	525	0	525	0	525	0	525	0	525	0	525	0	525	15.8751	525	0	0
0	525	0	525	0	525	0	525	0	525	0	525	0	525	0	525	0	525	0	525	0	525	0	525	0	525	15.8851	525	0	0
0	525	0	525	0	525	0	525	0	525	0	525	0	525	0	525	0	525	0	525	0	525	0	525	0	525	15.8951	525	0	0
0	525	0	525	0	525	0	525	0	525	0	525	0	525	0	525	0	525	0	525	0	525	0	525	0	525	15.9052	525	0	0
0	525	0	525	0	525	0	525	0	525	0	525	0	525	0	525	0	525	0	525	0	525	0	525	0	525	15.9152	525	0	0
0	525	0	525	0	525	0	525	0	525	0	525	0	525	0	525	0	525	0	525	0	525	0	525	0	525	15.9252	525	0	0
0	525	0	525	0	525	0	525	0	525	0	525	0	525	0	525	0	525	0	525	0	525	0	525	0	525	15.9352	525	0	0
0	525	0	525	0	525	0	525	0	525	0	525	0	525	0	525	0	525	0	525	0	525	0	525	0	525	15.9452	525	0	0
0	525	0	525	0	525	0	525	0	525	0	525	0	525	0	525	0	525	0	525	0	525	0	525	0	525	15.9552	525	0	0
0	525	0	525	0	525	0	525	0	525	0	525	0	525	0	525	0	525	0	525	0	525	0	525	0	525	15.9653	525	0	0
0	525	0	525	0	525	0	525	0	525	0	525	0	525	0	525	0	525	0	525	0	525	0	525	0	525	15.9753	525	0	0
0	525	0	525	0	525	0	525	0	525	0	525	0	525	0	525	0	525	0	525	0	525	0	525	0	525	15.9853	525	0	0
0	525	0	525	0	525	0	525	0	525	0	525	0	525	0	525	0	525	0	525	0	525	0	525	0	525	15.9953	525	0	0
0	525	0	525	0	525	0	525	0	525	0	525	0	525	0	525	0	525	0	525	0	525	0	525	0	525	16.0053	525	0	0
0	525	0	525	0	525	0	525	0	525	0	525	0	525	0	525	0	525	0	525	0	525	0	525	0	525	16.0153	525	0	0
0	525	0	525	0	525	0	525	0	525	0	525	0	525	0	525	0	525	0	525	0	525	0	525	0	525	16.0254	525	0	0
0	525	0	525	0	525	0	525	0	525	0	525	0	525	0	525	0	525	0	525	0	525	0	525	0	525	16.0354	525	0	0
0	525	0	525	0	525	0	525	0	525	0	525	0	525	0	525	0	525	0	525	0	525	0	525	0	525	16.0454	525	0	0
0	525	0	525	0	525	0	525	0	525	0	525	0	525	0	525	0	525	0	525	0	525	0	525	0	525	16.0554	525	0	0
0	525	0	525	0	525	0	525	0	525	0	525	0	525	0	525	0	525	0	525	0	525	0	525	0	525	16.0654	525	0	0
0	525	0	525	0	525	0	525	0	525	0	525	0	525	0	525	0	525	0	525	0	525	0	525	0	525	16.0754	525	0	0
0	525	0	525	0	525	0	525	0	525	0	525	0	525	0	525	0	525	0	525	0	525	0	525	0	525	16.0854	525	0	0
0	525	0	525	0	525	0	525	0	525	0	525	0	525	0	525	0	525	0	525	0	525	0	525	0	525	16.0955	525	0	0
0	525	0	525	0	525	0	525	0	525	0	525	0	525	0	525	0	525	0	525	0	525	0	525	0	525	16.1055	525	0	0
0	525	0	525	0	525	0	525	0	525	0	525	0	525	0	525	0	525	0	525	0	525	0	525	0	525	16.1155	525	0	0
0	525	0	525	0	525	0	525	0	525	0	525	0	525	0	525	0	525	0	525	0	525	0	525	0	525	16.1255	525	0	0
0	525	0	525	0	525	0	525	0	525	0	525	0	525	0	525	0	525	0	525	0	525	0	525	0	525	16.1355	525	0	0
0	525	0	525	0	525	0	525	0	525	0	525	0	525	0	525	0	525	0	525	0	525	0	525	0	525	16.1455	525	0	0
0	525	0	525	0	525	0	525	0	525	0	525	0	525	0	525	0	525	0	525	0	525	0	525	0	525	16.1556	525	0	0
0	525	0	525	0	525	0	525	0	525	0	525	0	525	0	525	0	525	0	525	0	525	0	525	0	525	16.1656	525	0	0
0	525	0	525	0	525	0	525	0	525	0	525	0	525	0	525	0	525	0	525	0	525	0	525	0	525	16.1756	525	0	0
0	525	0	525	0	525	0	525	0	525	0	525	0	525	0	525	0	525	0	525	0	525	0	525	0	525	16.1856	525	0	0
0	525	0	525	0	525	0	525	0	525	0	525	0	525	0	525	0	525	0	525	0	525	0	525	0	525	16.1956	525	0	0
0	525	0	525	0	525	0	525	0	525	0	525	0	525	0	525	0	525	0	525	0	525	0	525	0	525	16.2056	525	0	0
0	525	0	525	0	525	0	525	0	525	0	525	0	525	0	525	0	525	0	525	0	525	0	525	0	525	16.2157	525	0	0
0	525	0	525	0	525	0	525	0	525	0	525	0	525	0	525	0	525	0	525	0	525	0	525	0	525	16.2257	525	0	0
0	525	0	525	0	525	0	525	0	525	0	525	0	525	0	525	0	525	0	525	0	525	0	525	0	525	16.2357	525	0	0
0	525	0	525	0	525	0	525	0	525	0	525	0	525	0	525	0	525	0	525	0	525	0	525	0	525	16.2457	525	0	0
0	525	0	525	0	525	0	525	0	525	0	525	0	525	0	525	0	525	0	525	0	525	0	525	0	525	16.2557	525	0	0
0	525	0	525	0	525	0	525	0	525	0	525	0	525	0	525	0	525	0	525	0	525	0	525	0	525	16.2657	525	0	0
0	525	0	525	0	525	0	525	0	525	0	525	0	525	0	525	0	525	0	525	0	525	0	525	0	525	16.2757	525	0	0
0	525	0	525	0	525	0	525	0	525	0	525	0	525	0	525	0	525	0	525	0	525	0	525	0	525	16.2858	525	0	0
0	525	0	525	0	525	0	525	0	525	0	525	0	525	0	525	0	525	0	525	0	525	0	525	0	525	16.2958	525	0	0
0	525	0	525	0	525	0	525	0	525	0	525	0	525	0	525	0	525	0	525	0	525	0	525	0	525	16.3058	525	0	0
0	525	0	525	0	525	0	525	0	525	0	525	0	525	0	525	0	525	0	525	0	525	0	525	0	525	16.3158	525	0	0
0	525	0	525	0	525	0	525	0	525	0	525	0	525	0	525	0	525	0	525	0	525	0	525	0	525	16.3258	525	0	0
0	525	0	525	0	525	0	525	0	525	0	525	0	525	0	525	0	525	0	525	0	525	0	525	0	525	16.3358	525	0	0
0	525	0	525	0	525	0	525	0	525	0	525	0	525	0	525	0	525	0	525	0	525	0	525	0	525	16.3459	525	0	0
0	525	0	525	0	525	0	525	0	525	0	525	0	525	0	525	0	525	0	525	0	525	0	525	0	525	16.3559	525	0	0
0	525	0	525	0	525	0	525	0	525	0	525	0	525	0	525	0	525	0	525	0	525	0	525	0	525	16.3659	525	0	0
0	525	0	525	0	525	0	525	0	525	0	525	0	525	0	525	0	525	0	525	0	525	0	525	0	525	16.3759	525	0	0
0	525	0	525	0	525	0	525	0	525	0	525	0	525	0	525	0	525	0	525	0	525	0	525	0	525	16.3859	525	0	0
0	525	0	525	0	525	0	525	0	525	0	525	0	525	0	525	0	525	0	525	0	525	0	525	0	525	16.3959	525	0	0
0	525	0	525	0	525	0	525	0	525	0	525	0	525	0	525	0	525	0	525	0	525	0	525	0	525	16.406	525	0	0
0	525	0	525	0	525	0	525	0	525	0	525	0	525	0	525	0	525	0	525	0	525	0	525	0	525	16.416	525	0	0
0	525	0	525	0	525	0	525	0	525	0	525	0	525	0	525	0	525	0	525	0	525	0	525	0	525	16.426	525	0	0
0	525	0	525	0	525	0	525	0	525	0	525	0	525	0	525	0	525	0	525	0	525	0	525	0	525	16.436	525	0	0
0	525	0	525	0	525	0	525	0	525	0	525	0	525	0	525	0	525	0	525	0	525	0	525	0	525	16.446	525	0	0
0	525	0	525	0	525	0	525	0	525	0	525	0	525	0	525	0	525	0	525	0	525	0	525	0	525	16.456	525	0	0
0	525	0	525	0	525	0	525	0	525	0	525	0	525	0	525	0	525	0	525	0	525	0	525	0	525	16.4661	525	0	0
0	525	0	525	0	525	0	525	0	525	0	525	0	525	0	525	0	525	0	525	0	525	0	525	0	525	16.4761	525	0	0
0	525	0	525	0	525	0	525	0	525	0	525	0	525	0	525	0	525	0	525	0	525	0	525	0	525	16.4861	525	0	0
0	525	0	525	0	525	0	525	0	525	0	525	0	525	0	525	0	525	0	525	0	525	0	525	0	525	16.4961	525	0	0
0	525	0	525	0	525	0	525	0	525	0	525	0	525	0	525	0	525	0	525	0	525	0	525	0	525	16.5061	525	0	0
0	525	0	525	0	525	0	525	0	525	0	525	0	525	0	525	0	525	0	525	0	525	0	525	0	525	16.5161	525	0	0
0	525	0	525	0	525	0	525	0	525	0	525	0	525	0	525	0	525	0	525	0	525	0	525	0	525	16.5261	525	0	0
0	525	0	525	0	525	0	525	0	525	0	525	0	525	0	525	0	525	0	525	0	525	0	525	0	525	16.5362	525	0	0
0	525	0	525	0	525	0	525	0	525	0	525	0	525	0	525	0	525	0	525	0	525	0	525	0	525	16.5462	525	0	0
0	525	0	525	0	525	0	525	0	525	0	525	0	525	0	525	0	525	0	525	0	525	0	525	0	525	16.5562	525	0	0
0	525	0	525	0	525	0	525	0	525	0	525	0	525	0	525	0	525	0	525	0	525	0	525	0	525	16.5662	525	0	0
0	525	0	525	0	525	0	525	0	525	0	525	0	525	0	525	0	525	0	525	0	525	0	525	0	525	16.5762	525	0	0
0	525	0	525	0	525	0	525	0	525	0	525	0	525	0	525	0	525	0	525	0	525	0	525	0	525	16.5862	525	0	0
0	525	0	525	0	525	0	525	0	525	0	525	0	525	0	525	0	525	0	525	0	525	0	525	0	525	16.5963	525	0	0
0	525	0	525	0	525	0	525	0	525	0	525	0	525	0	525	0	525	0	525	0	525	0	525	0	525	16.6063	525	0	0
0	525	0	525	0	525	0	525	0	525	0	525	0	525	0	525	0	525	0	525	0	525	0	525	0	525	16.6163	525	0	0
0	525	0	525	0	525	0	525	0	525	0	525	0	525	0	525	0	525	0	525	0	525	0	525	0	525	16.6263	525	0	0
0	525	0	525	0	525	0	525	0	525	0	525	0	525	0	525	0	525	0	525	0	525	0	525	0	525	16.6363	525	0	0
0	525	0	525	0	525	0	525	0	525	0	525	0	525	0	525	0	525	0	525	0	525	0	525	0	525	16.6463	525	0	0
0	525	0	525	0	525	0	525	0	525	0	525	0	525	0	525	0	525	0	525	0	525	0	525	0	525	16.6564	525	0	0
0	525	0	525	0	525	0	525	0	525	0	525	0	525	0	525	0	525	0	525	0	525	0	525	0	525	16.6664	525	0	0
0	525	0	525	0	525	0	525	0	525	0	525	0	525	0	525	0	525	0	525	0	525	0	525	0	525	16.6764	525	0	0
0	525	0	525	0	525	0	525	0	525	0	525	0	525	0	525	0	525	0	525	0	525	0	525	0	525	16.6864	525	0	0
0	525	0	525	0	525	0	525	0	525	0	525	0	525	0	525	0	525	0	525	0	525	0	525	0	525	16.6964	525	0	0
0	525	0	525	0	525	0	525	0	525	0	525	0	525	0	525	0	525	0	525	0	525	0	525	0	525	16.7064	525	0	0
0	525	0	525	0	525	0	525	0	525	0	525	0	525	0	525	0	525	0	525	0	525	0	525	0	525	16.7164	525	0	0
0	525	0	525	0	525	0	525	0	525	0	525	0	525	0	525	0	525	0	525	0	525	0	525	0	525	16.7265	525	0	0
0	525	0	525	0	525	0	525	0	525	0	525	0	525	0	525	0	525	0	525	0	525	0	525	0	525	16.7365	525	0	0
0	525	0	525	0	525	0	525	0	525	0	525	0	525	0	525	0	525	0	525	0	525	0	525	0	525	16.7465	525	0	0
0	525	0	525	0	525	0	525	0	525	0	525	0	525	0	525	0	525	0	525	0	525	0	525	0	525	16.7565	525	0	0
0	525	0	525	0	525	0	525	0	525	0	525	0	525	0	525	0	525	0	525	0	525	0	525	0	525	16.7665	525	0	0
0	525	0	525	0	525	0	525	0	525	0	525	0	525	0	525	0	525	0	525	0	525	0	525	0	525	16.7765	525	0	0
0	525	0	525	0	525	0	525	0	525	0	525	0	525	0	525	0	525	0	525	0	525	0	525	0	525	16.7866	525	0	0
0	525	0	525	0	525	0	525	0	525	0	525	0	525	0	525	0	525	0	525	0	525	0	525	0	525	16.7966	525	0	0
0	525	0	525	0	525	0	525	0	525	0	525	0	525	0	525	0	525	0	525	0	525	0	525	0	525	16.8066	525	0	0
0	525	0	525	0	525	0	525	0	525	0	525	0	525	0	525	0	525	0	525	0	525	0	525	0	525	16.8166	525	0	0
0	525	0	525	0	525	0	525	0	525	0	525	0	525	0	525	0	525	0	525	0	525	0	525	0	525	16.8266	525	0	0
0	525	0	525	0	525	0	525	0	525	0	525	0	525	0	525	0	525	0	525	0	525	0	525	0	525	16.8366	525	0	0
0	525	0	525	0	525	0	525	0	525	0	525	0	525	0	525	0	525	0	525	0	525	0	525	0	525	16.8467	525	0	0
0	525	0	525	0	525	0	525	0	525	0	525	0	525	0	525	0	525	0	525	0	525	0	525	0	525	16.8567	525	0	0
0	525	0	525	0	525	0	525	0	525	0	525	0	525	0	525	0	525	0	525	0	525	0	525	0	525	16.8667	525	0	0
0	525	0	525	0	525	0	525	0	525	0	525	0	525	0	525	0	525	0	525	0	525	0	525	0	525	16.8767	525	0	0
0	525	0	525	0	525	0	525	0	525	0	525	0	525	0	525	0	525	0	525	0	525	0	525	0	525	16.8867	525	0	0
0	525	0	525	0	525	0	525	0	525	0	525	0	525	0	525	0	525	0	525	0	525	0	525	0	525	16.8967	525	0	0
0	525	0	525	0	525	0	525	0	525	0	525	0	525	0	525	0	525	0	525	0	525	0	525	0	525	16.9067	525	0	0
0	525	0	525	0	525	0	525	0	525	0	525	0	525	0	525	0	525	0	525	0	525	0	525	0	525	16.9168	525	0	0
0	525	0	525	0	525	0	525	0	525	0	525	0	525	0	525	0	525	0	525	0	525	0	525	0	525	16.9268	525	0	0
0	525	0	525	0	525	0	525	0	525	0	525	0	525	0	525	0	525	0	525	0	525	0	525	0	525	16.9368	525	0	0
0	525	0	525	0	525	0	525	0	525	0	525	0	525	0	525	0	525	0	525	0	525	0	525	0	525	16.9468	525	0	0
0	525	0	525	0	525	0	525	0	525	0	525	0	525	0	525	0	525	0	525	0	525	0	525	0	525	16.9568	525	0	0
0	525	0	525	0	525	0	525	0	525	0	525	0	525	0	525	0	525	0	525	0	525	0	525	0	525	16.9668	525	0	0
0	525	0	525	0	525	0	525	0	525	0	525	0	525	0	525	0	525	0	525	0	525	0	525	0	525	16.9769	525	0	0
0	525	0	525	0	525	0	525	0	525	0	525	0	525	0	525	0	525	0	525	0	525	0	525	0	525	16.9869	525	0	0
0	525	0	525	0	525	0	525	0	525	0	525	0	525	0	525	0	525	0	525	0	525	0	525	0	525	16.9969	525	0	0
0	525	0	525	0	525	0	525	0	525	0	525	0	525	0	525	0	525	0	525	0	525	0	525	0	525	17.0069	525	0	0
0	525	0	525	0	525	0	525	0	525	0	525	0	525	0	525	0	525	0	525	0	525	0	525	0	525	17.0169	525	0	0
0	525	0	525	0	525	0	525	0	525	0	525	0	525	0	525	0	525	0	525	0	525	0	525	0	525	17.0269	525	0	0
0	525	0	525	0	525	0	525	0	525	0	525	0	525	0	525	0	525	0	525	0	525	0	525	0	525	17.037	525	0	0
0	525	0	525	0	525	0	525	0	525	0	525	0	525	0	525	0	525	0	525	0	525	0	525	0	525	17.047	525	0	0
0	525	0	525	0	525	0	525	0	525	0	525	0	525	0	525	0	525	0	525	0	525	0	525	0	525	17.057	525	0	0
0	525	0	525	0	525	0	525	0	525	0	525	0	525	0	525	0	525	0	525	0	525	0	525	0	525	17.067	525	0	0
0	525	0	525	0	525	0	525	0	525	0	525	0	525	0	525	0	525	0	525	0	525	0	525	0	525	17.077	525	0	0
0	525	0	525	0	525	0	525	0	525	0	525	0	525	0	525	0	525	0	525	0	525	0	525	0	525	17.087	525	0	0
0	525	0	525	0	525	0	525	0	525	0	525	0	525	0	525	0	525	0	525	0	525	0	525	0	525	17.097	525	0	0
0	525	0	525	0	525	0	525	0	525	0	525	0	525	0	525	0	525	0	525	0	525	0	525	0	525	17.1071	525	0	0
0	525	0	525	0	525	0	525	0	525	0	525	0	525	0	525	0	525	0	525	0	525	0	525	0	525	17.1171	525	0	0
0	525	0	525	0	525	0	525	0	525	0	525	0	525	0	525	0	525	0	525	0	525	0	525	0	525	17.1271	525	0	0
0	525	0	525	0	525	0	525	0	525	0	525	0	525	0	525	0	525	0	525	0	525	0	525	0	525	17.1371	525	0	0
0	525	0	525	0	525	0	525	0	525	0	525	0	525	0	525	0	525	0	525	0	525	0	525	0	525	17.1471	525	0	0
0	525	0	525	0	525	0	525	0	525	0	525	0	525	0	525	0	525	0	525	0	525	0	525	0	525	17.1571	525	0	0
0	525	0	525	0	525	0	525	0	525	0	525	0	525	0	525	0	525	0	525	0	525	0	525	0	525	17.1672	525	0	0
0	525	0	525	0	525	0	525	0	525	0	525	0	525	0	525	0	525	0	525	0	525	0	525	0	525	17.1772	525	0	0
0	525	0	525	0	525	0	525	0	525	0	525	0	525	0	525	0	525	0	525	0	525	0	525	0	525	17.1872	525	0	0
0	525	0	525	0	525	0	525	0	525	0	525	0	525	0	525	0	525	0	525	0	525	0	525	0	525	17.1972	525	0	0
0	525	0	525	0	525	0	525	0	525	0	525	0	525	0	525	0	525	0	525	0	525	0	525	0	525	17.2072	525	0	0
0	525	0	525	0	525	0	525	0	525	0	525	0	525	0	525	0	525	0	525	0	525	0	525	0	525	17.2172	525	0	0
0	525	0	525	0	525	0	525	0	525	0	525	0	525	0	525	0	525	0	525	0	525	0	525	0	525	17.2273	525	0	0
0	525	0	525	0	525	0	525	0	525	0	525	0	525	0	525	0	525	0	525	0	525	0	525	0	525	17.2373	525	0	0
0	525	0	525	0	525	0	525	0	525	0	525	0	525	0	525	0	525	0	525	0	525	0	525	0	525	17.2473	525	0	0
0	525	0	525	0	525	0	525	0	525	0	525	0	525	0	525	0	525	0	525	0	525	0	525	0	525	17.2573	525	0	0
0	525	0	525	0	525	0	525	0	525	0	525	0	525	0	525	0	525	0	525	0	525	0	525	0	525	17.2673	525	0	0
0	525	0	525	0	525	0	525	0	525	0	525	0	525	0	525	0	525	0	525	0	525	0	525	0	525	17.2773	525	0	0
0	525	0	525	0	525	0	525	0	525	0	525	0	525	0	525	0	525	0	525	0	525	0	525	0	525	17.2873	525	0	0
0	525	0	525	0	525	0	525	0	525	0	525	0	525	0	525	0	525	0	525	0	525	0	525	0	525	17.2974	525	0	0
0	525	0	525	0	525	0	525	0	525	0	525	0	525	0	525	0	525	0	525	0	525	0	525	0	525	17.3074	525	0	0
0	525	0	525	0	525	0	525	0	525	0	525	0	525	0	525	0	525	0	525	0	525	0	525	0	525	17.3174	525	0	0
0	525	0	525	0	525	0	525	0	525	0	525	0	525	0	525	0	525	0	525	0	525	0	525	0	525	17.3274	525	0	0
0	525	0	525	0	525	0	525	0	525	0	525	0	525	0	525	0	525	0	525	0	525	0	525	0	525	17.3374	525	0	0
0	525	0	525	0	525	0	525	0	525	0	525	0	525	0	525	0	525	0	525	0	525	0	525	0	525	17.3474	525	0	0
0	525	0	525	0	525	0	525	0	525	0	525	0	525	0	525	0	525	0	525	0	525	0	525	0	525	17.3575	525	0	0
0	525	0	525	0	525	0	525	0	525	0	525	0	525	0	525	0	525	0	525	0	525	0	525	0	525	17.3675	525	0	0
0	525	0	525	0	525	0	525	0	525	0	525	0	525	0	525	0	525	0	525	0	525	0	525	0	525	17.3775	525	0	0
0	525	0	525	0	525	0	525	0	525	0	525	0	525	0	525	0	525	0	525	0	525	0	525	0	525	17.3875	525	0	0
0	525	0	525	0	525	0	525	0	525	0	525	0	525	0	525	0	525	0	525	0	525	0	525	0	525	17.3975	525	0	0
0	525	0	525	0	525	0	525	0	525	0	525	0	525	0	525	0	525	0	525	0	525	0	525	0	525	17.4075	525	0	0
0	525	0	525	0	525	0	525	0	525	0	525	0	525	0	525	0	525	0	525	0	525	0	525	0	525	17.4176	525	0	0
0	525	0	525	0	525	0	525	0	525	0	525	0	525	0	525	0	525	0	525	0	525	0	525	0	525	17.4276	525	0	0
0	525	0	525	0	525	0	525	0	525	0	525	0	525	0	525	0	525	0	525	0	525	0	525	0	525	17.4376	525	0	0
0	525	0	525	0	525	0	525	0	525	0	525	0	525	0	525	0	525	0	525	0	525	0	525	0	525	17.4476	525	0	0
0	525	0	525	0	525	0	525	0	525	0	525	0	525	0	525	0	525	0	525	0	525	0	525	0	525	17.4576	525	0	0
0	525	0	525	0	525	0	525	0	525	0	525	0	525	0	525	0	525	0	525	0	525	0	525	0	525	17.4676	525	0	0
0	525	0	525	0	525	0	525	0	525	0	525	0	525	0	525	0	525	0	525	0	525	0	525	0	525	17.4777	525	0	0
0	525	0	525	0	525	0	525	0	525	0	525	0	525	0	525	0	525	0	525	0	525	0	525	0	525	17.4877	525	0	0
0	525	0	525	0	525	0	525	0	525	0	525	0	525	0	525	0	525	0	525	0	525	0	525	0	525	17.4977	525	0	0
0	525	0	525	0	525	0	525	0	525	0	525	0	525	0	525	0	525	0	525	0	525	0	525	0	525	17.5077	525	0	0
0	525	0	525	0	525	0	525	0	525	0	525	0	525	0	525	0	525	0	525	0	525	0	525	0	525	17.5177	525	0	0
0	525	0	525	0	525	0	525	0	525	0	525	0	525	0	525	0	525	0	525	0	525	0	525	0	525	17.5277	525	0	0
0	525	0	525	0	525	0	525	0	525	0	525	0	525	0	525	0	525	0	525	0	525	0	525	0	525	17.5377	525	0	0
0	525	0	525	0	525	0	525	0	525	0	525	0	525	0	525	0	525	0	525	0	525	0	525	0	525	17.5478	525	0	0
0	525	0	525	0	525	0	525	0	525	0	525	0	525	0	525	0	525	0	525	0	525	0	525	0	525	17.5578	525	0	0
0	525	0	525	0	525	0	525	0	525	0	525	0	525	0	525	0	525	0	525	0	525	0	525	0	525	17.5678	525	0	0
0	525	0	525	0	525	0	525	0	525	0	525	0	525	0	525	0	525	0	525	0	525	0	525	0	525	17.5778	525	0	0
0	525	0	525	0	525	0	525	0	525	0	525	0	525	0	525	0	525	0	525	0	525	0	525	0	525	17.5878	525	0	0
0	525	0	525	0	525	0	525	0	525	0	525	0	525	0	525	0	525	0	525	0	525	0	525	0	525	17.5978	525	0	0
0	525	0	525	0	525	0	525	0	525	0	525	0	525	0	525	0	525	0	525	0	525	0	525	0	525	17.6079	525	0	0
0	525	0	525	0	525	0	525	0	525	0	525	0	525	0	525	0	525	0	525	0	525	0	525	0	525	17.6179	525	0	0
0	525	0	525	0	525	0	525	0	525	0	525	0	525	0	525	0	525	0	525	0	525	0	525	0	525	17.6279	525	0	0
0	525	0	525	0	525	0	525	0	525	0	525	0	525	0	525	0	525	0	525	0	525	0	525	0	525	17.6379	525	0	0
0	525	0	525	0	525	0	525	0	525	0	525	0	525	0	525	0	525	0	525	0	525	0	525	0	525	17.6479	525	0	0
0	525	0	525	0	525	0	525	0	525	0	525	0	525	0	525	0	525	0	525	0	525	0	525	0	525	17.6579	525	0	0
0	525	0	525	0	525	0	525	0	525	0	525	0	525	0	525	0	525	0	525	0	525	0	525	0	525	17.668	525	0	0
0	525	0	525	0	525	0	525	0	525	0	525	0	525	0	525	0	525	0	525	0	525	0	525	0	525	17.678	525	0	0
0	525	0	525	0	525	0	525	0	525	0	525	0	525	0	525	0	525	0	525	0	525	0	525	0	525	17.688	525	0	0
0	525	0	525	0	525	0	525	0	525	0	525	0	525	0	525	0	525	0	525	0	525	0	525	0	525	17.698	525	0	0
0	525	0	525	0	525	0	525	0	525	0	525	0	525	0	525	0	525	0	525	0	525	0	525	0	525	17.708	525	0	0
0	525	0	525	0	525	0	525	0	525	0	525	0	525	0	525	0	525	0	525	0	525	0	525	0	525	17.718	525	0	0
0	525	0	525	0	525	0	525	0	525	0	525	0	525	0	525	0	525	0	525	0	525	0	525	0	525	17.728	525	0	0
0	525	0	525	0	525	0	525	0	525	0	525	0	525	0	525	0	525	0	525	0	525	0	525	0	525	17.7381	525	0	0
0	525	0	525	0	525	0	525	0	525	0	525	0	525	0	525	0	525	0	525	0	525	0	525	0	525	17.7481	525	0	0
0	525	0	525	0	525	0	525	0	525	0	525	0	525	0	525	0	525	0	525	0	525	0	525	0	525	17.7581	525	0	0
0	525	0	525	0	525	0	525	0	525	0	525	0	525	0	525	0	525	0	525	0	525	0	525	0	525	17.7681	525	0	0
0	525	0	525	0	525	0	525	0	525	0	525	0	525	0	525	0	525	0	525	0	525	0	525	0	525	17.7781	525	0	0
0	525	0	525	0	525	0	525	0	525	0	525	0	525	0	525	0	525	0	525	0	525	0	525	0	525	17.7881	525	0	0
0	525	0	525	0	525	0	525	0	525	0	525	0	525	0	525	0	525	0	525	0	525	0	525	0	525	17.7982	525	0	0
0	525	0	525	0	525	0	525	0	525	0	525	0	525	0	525	0	525	0	525	0	525	0	525	0	525	17.8082	525	0	0
0	525	0	525	0	525	0	525	0	525	0	525	0	525	0	525	0	525	0	525	0	525	0	525	0	525	17.8182	525	0	0
0	525	0	525	0	525	0	525	0	525	0	525	0	525	0	525	0	525	0	525	0	525	0	525	0	525	17.8282	525	0	0
0	525	0	525	0	525	0	525	0	525	0	525	0	525	0	525	0	525	0	525	0	525	0	525	0	525	17.8382	525	0	0
0	525	0	525	0	525	0	525	0	525	0	525	0	525	0	525	0	525	0	525	0	525	0	525	0	525	17.8482	525	0	0
0	525	0	525	0	525	0	525	0	525	0	525	0	525	0	525	0	525	0	525	0	525	0	525	0	525	17.8583	525	0	0
0	525	0	525	0	525	0	525	0	525	0	525	0	525	0	525	0	525	0	525	0	525	0	525	0	525	17.8683	525	0	0
0	525	0	525	0	525	0	525	0	525	0	525	0	525	0	525	0	525	0	525	0	525	0	525	0	525	17.8783	525	0	0
0	525	0	525	0	525	0	525	0	525	0	525	0	525	0	525	0	525	0	525	0	525	0	525	0	525	17.8883	525	0	0
0	525	0	525	0	525	0	525	0	525	0	525	0	525	0	525	0	525	0	525	0	525	0	525	0	525	17.8983	525	0	0
0	525	0	525	0	525	0	525	0	525	0	525	0	525	0	525	0	525	0	525	0	525	0	525	0	525	17.9083	525	0	0
0	525	0	525	0	525	0	525	0	525	0	525	0	525	0	525	0	525	0	525	0	525	0	525	0	525	17.9183	525	0	0
0	525	0	525	0	525	0	525	0	525	0	525	0	525	0	525	0	525	0	525	0	525	0	525	0	525	17.9284	525	0	0
0	525	0	525	0	525	0	525	0	525	0	525	0	525	0	525	0	525	0	525	0	525	0	525	0	525	17.9384	525	0	0
0	525	0	525	0	525	0	525	0	525	0	525	0	525	0	525	0	525	0	525	0	525	0	525	0	525	17.9484	525	0	0
0	525	0	525	0	525	0	525	0	525	0	525	0	525	0	525	0	525	0	525	0	525	0	525	0	525	17.9584	525	0	0
0	525	0	525	0	525	0	525	0	525	0	525	0	525	0	525	0	525	0	525	0	525	0	525	0	525	17.9684	525	0	0
0	525	0	525	0	525	0	525	0	525	0	525	0	525	0	525	0	525	0	525	0	525	0	525	0	525	17.9784	525	0	0
0	525	0	525	0	525	0	525	0	525	0	525	0	525	0	525	0	525	0	525	0	525	0	525	0	525	17.9885	525	0	0
0	525	0	525	0	525	0	525	0	525	0	525	0	525	0	525	0	525	0	525	0	525	0	525	0	525	17.9985	525	0	0
0	525	0	525	0	525	0	525	0	525	0	525	0	525	0	525	0	525	0	525	0	525	0	525	0	525	18.0085	525	0	0
0	525	0	525	0	525	0	525	0	525	0	525	0	525	0	525	0	525	0	525	0	525	0	525	0	525	18.0185	525	0	0
0	525	0	525	0	525	0	525	0	525	0	525	0	525	0	525	0	525	0	525	0	525	0	525	0	525	18.0285	525	0	0
0	525	0	525	0	525	0	525	0	525	0	525	0	525	0	525	0	525	0	525	0	525	0	525	0	525	18.0385	525	0	0
0	525	0	525	0	525	0	525	0	525	0	525	0	525	0	525	0	525	0	525	0	525	0	525	0	525	18.0486	525	0	0
0	525	0	525	0	525	0	525	0	525	0	525	0	525	0	525	0	525	0	525	0	525	0	525	0	525	18.0586	525	0	0
0	525	0	525	0	525	0	525	0	525	0	525	0	525	0	525	0	525	0	525	0	525	0	525	0	525	18.0686	525	0	0
0	525	0	525	0	525	0	525	0	525	0	525	0	525	0	525	0	525	0	525	0	525	0	525	0	525	18.0786	525	0	0
0	525	0	525	0	525	0	525	0	525	0	525	0	525	0	525	0	525	0	525	0	525	0	525	0	525	18.0886	525	0	0
0	525	0	525	0	525	0	525	0	525	0	525	0	525	0	525	0	525	0	525	0	525	0	525	0	525	18.0986	525	0	0
0	525	0	525	0	525	0	525	0	525	0	525	0	525	0	525	0	525	0	525	0	525	0	525	0	525	18.1086	525	0	0
0	525	0	525	0	525	0	525	0	525	0	525	0	525	0	525	0	525	0	525	0	525	0	525	0	525	18.1187	525	0	0
0	525	0	525	0	525	0	525	0	525	0	525	0	525	0	525	0	525	0	525	0	525	0	525	0	525	18.1287	525	0	0
0	525	0	525	0	525	0	525	0	525	0	525	0	525	0	525	0	525	0	525	0	525	0	525	0	525	18.1387	525	0	0
0	525	0	525	0	525	0	525	0	525	0	525	0	525	0	525	0	525	0	525	0	525	0	525	0	525	18.1487	525	0	0
0	525	0	525	0	525	0	525	0	525	0	525	0	525	0	525	0	525	0	525	0	525	0	525	0	525	18.1587	525	0	0
0	525	0	525	0	525	0	525	0	525	0	525	0	525	0	525	0	525	0	525	0	525	0	525	0	525	18.1687	525	0	0
0	525	0	525	0	525	0	525	0	525	0	525	0	525	0	525	0	525	0	525	0	525	0	525	0	525	18.1788	525	0	0
0	525	0	525	0	525	0	525	0	525	0	525	0	525	0	525	0	525	0	525	0	525	0	525	0	525	18.1888	525	0	0
0	525	0	525	0	525	0	525	0	525	0	525	0	525	0	525	0	525	0	525	0	525	0	525	0	525	18.1988	525	0	0
0	525	0	525	0	525	0	525	0	525	0	525	0	525	0	525	0	525	0	525	0	525	0	525	0	525	18.2088	525	0	0
0	525	0	525	0	525	0	525	0	525	0	525	0	525	0	525	0	525	0	525	0	525	0	525	0	525	18.2188	525	0	0
0	525	0	525	0	525	0	525	0	525	0	525	0	525	0	525	0	525	0	525	0	525	0	525	0	525	18.2288	525	0	0
0	525	0	525	0	525	0	525	0	525	0	525	0	525	0	525	0	525	0	525	0	525	0	525	0	525	18.2389	525	0	0
0	525	0	525	0	525	0	525	0	525	0	525	0	525	0	525	0	525	0	525	0	525	0	525	0	525	18.2489	525	0	0
0	525	0	525	0	525	0	525	0	525	0	525	0	525	0	525	0	525	0	525	0	525	0	525	0	525	18.2589	525	0	0
0	525	0	525	0	525	0	525	0	525	0	525	0	525	0	525	0	525	0	525	0	525	0	525	0	525	18.2689	525	0	0
0	525	0	525	0	525	0	525	0	525	0	525	0	525	0	525	0	525	0	525	0	525	0	525	0	525	18.2789	525	0	0
0	525	0	525	0	525	0	525	0	525	0	525	0	525	0	525	0	525	0	525	0	525	0	525	0	525	18.2889	525	0	0
0	525	0	525	0	525	0	525	0	525	0	525	0	525	0	525	0	525	0	525	0	525	0	525	0	525	18.299	525	0	0
0	525	0	525	0	525	0	525	0	525	0	525	0	525	0	525	0	525	0	525	0	525	0	525	0	525	18.309	525	0	0
0	525	0	525	0	525	0	525	0	525	0	525	0	525	0	525	0	525	0	525	0	525	0	525	0	525	18.319	525	0	0
0	525	0	525	0	525	0	525	0	525	0	525	0	525	0	525	0	525	0	525	0	525	0	525	0	525	18.329	525	0	0
0	525	0	525	0	525	0	525	0	525	0	525	0	525	0	525	0	525	0	525	0	525	0	525	0	525	18.339	525	0	0
1.17	525	2.04	525	0.49	525	-0.45	525	0.12	525	0.27	525	0.41	525	0.1	525	1.42	525	-1.06	525	-1.73	525	0.71	525	-0.11	525	18.349	525	0.26	0.277452
1.03	525	1.8	525	0.35	525	-0.45	525	-0.05	525	0.69	525	0.34	525	0.36	525	1.22	525	-0.38	525	-1.82	525	0.86	525	-0.01	525	18.359	525	0.303077	0.251157
1.42	525	1.71	525	1.07	525	-0.58	525	-0.38	525	0.26	525	0.1	525	0.47	525	1.32	525	-0.86	525	-1.77	525	0.77	525	-0.03	525	18.3691	525	0.269231	0.278861
1.41	525	1.53	525	1.37	525	-0.43	525	-0.23	525	0.07	525	0.02	525	0.34	525	1.24	525	-0.69	525	-1.89	525	0.99	525	-0.06	525	18.3791	525	0.282308	0.278481
1.32	525	1.35	525	0.67	525	-0.21	525	0.09	525	0.72	525	0.05	525	0.39	525	0.86	525	-0.43	525	-2.02	525	1.02	525	0.12	525	18.3891	525	0.302308	0.248207
1.06	525	1.7	525	0.62	525	-0.25	525	0.04	525	0.46	525	0.13	525	0.73	525	0.89	525	-0.89	525	-1.88	525	0.92	525	0.26	525	18.3991	525	0.291538	0.255091
1.14	525	1.75	525	0.68	525	-0.26	525	0.29	525	0.11	525	-0.11	525	0.39	525	1.23	525	-0.69	525	-1.89	525	0.88	525	0.41	525	18.4091	525	0.302308	0.259042
1.62	525	1.81	525	0.94	525	0.23	525	-0.1	525	-0.21	525	0.13	525	0.37	525	1.29	525	-0.36	525	-1.76	525	0.98	525	0.38	525	18.4191	525	0.409231	0.263895
1.69	525	1.83	525	0.59	525	-0.15	525	-0.01	525	0.3	525	0.42	525	0.41	525	1.33	525	-0.56	525	-1.51	525	1.15	525	0.56	525	18.4292	525	0.465385	0.25562
1.63	525	1.96	525	0.87	525	-0.49	525	-0.19	525	0.35	525	0.56	525	0.59	525	1.35	525	-0.68	525	-1.52	525	0.87	525	0.51	525	18.4392	525	0.446923	0.269514
1.56	525	2.06	525	1.14	525	-0.19	525	-0.04	525	0.48	525	0.8	525	0.32	525	1.24	525	-0.44	525	-1.6	525	0.71	525	0.63	525	18.4492	525	0.513077	0.262596
1.54	525	2	525	0.86	525	-0.78	525	-0.18	525	0.27	525	0.94	525	0.18	525	0.98	525	-0.11	525	-1.56	525	0.91	525	0.46	525	18.4592	525	0.423846	0.263742
1.58	525	2.16	525	0.87	525	-0.42	525	-0.03	525	0.72	525	0.55	525	0.21	525	1.03	525	0.17	525	-1.46	525	0.92	525	0.27	525	18.4692	525	0.505385	0.250404
1.41	525	2.5	525	0.49	525	-0.19	525	-0.11	525	0.27	525	0.65	525	-0.07	525	1.21	525	-0.61	525	-1.49	525	0.94	525	0.32	525	18.4792	525	0.409231	0.276098
1.08	525	1.88	525	-0.12	525	-0.4	525	0.04	525	0.39	525	0.67	525	0.31	525	1.32	525	0.06	525	-1.46	525	1.11	525	0.31	525	18.4893	525	0.399231	0.236259
1.56	525	1.96	525	-0.55	525	-0.43	525	-0.25	525	0.08	525	0.14	525	0.3	525	1.31	525	0.03	525	-1.45	525	0.45	525	0.08	525	18.4993	525	0.248462	0.25529
1.25	525	2.28	525	0.66	525	-0.03	525	-0.47	525	0.03	525	-0.07	525	0.82	525	1.06	525	-0.07	525	-1.58	525	0.45	525	0.12	525	18.5093	525	0.342308	0.258385
1.47	525	1.98	525	1.03	525	0.25	525	-0.11	525	-0.12	525	-0.01	525	0.54	525	1.12	525	0.33	525	-1.84	525	0.63	525	0.11	525	18.5193	525	0.413846	0.258872
1.66	525	1.72	525	-0.21	525	0.35	525	0.18	525	0.52	525	0.39	525	0.33	525	1.01	525	0.05	525	-1.64	525	0.6	525	0.35	525	18.5293	525	0.408462	0.233015
1.94	525	1.8	525	0.04	525	0.23	525	0.13	525	0.29	525	0.82	525	0.14	525	1.14	525	1.14	525	-1.54	525	0.65	525	0.29	525	18.5393	525	0.543846	0.24656
1.96	525	2.18	525	-0.05	525	0.03	525	-0.01	525	0.05	525	0.45	525	0.2	525	0.96	525	-0.21	525	-1.51	525	0.48	525	0.35	525	18.5493	525	0.375385	0.260784
1.86	525	2.41	525	0.37	525	0.19	525	-0.3	525	0.35	525	0.8	525	0.28	525	1	525	-0.53	525	-1.4	525	0.49	525	0.5	525	18.5594	525	0.463077	0.269316
1.29	525	2.32	525	0.56	525	0.42	525	-0.12	525	0.23	525	0.75	525	0.01	525	1.06	525	-0.73	525	-1.58	525	0.49	525	0.6	525	18.5694	525	0.407692	0.262613
1.45	525	2.23	525	-0.26	525	0.22	525	-0.3	525	0.7	525	0.99	525	0.26	525	0.92	525	-0.58	525	-1.39	525	0.54	525	0.23	525	18.5794	525	0.385385	0.257549
1.47	525	2.03	525	0.01	525	0.47	525	-0.23	525	0.22	525	1.2	525	0.27	525	1.28	525	-1.04	525	-1.72	525	0.53	525	0.51	525	18.5894	525	0.384615	0.282086
1.11	525	2.07	525	0.19	525	0.48	525	-0.22	525	0.59	525	1.96	525	-0.01	525	1.17	525	-0.64	525	-1.64	525	0.78	525	0.66	525	18.5994	525	0.5	0.280611
0.81	525	1.84	525	0.47	525	0.93	525	-0.1	525	0.44	525	2.17	525	0.15	525	1.4	525	-0.6	525	-1.74	525	0.98	525	0.4	525	18.6094	525	0.55	0.284177
1.31	525	1.44	525	0.39	525	1.36	525	-0.17	525	0.51	525	2.11	525	0.04	525	1.23	525	-0.32	525	-2	525	0.78	525	0.52	525	18.6195	525	0.553846	0.289125
1.45	525	1.71	525	0.43	525	1.63	525	0.11	525	0.49	525	1.74	525	0.11	525	0.75	525	-1.04	525	-2.08	525	0.71	525	0.31	525	18.6295	525	0.486154	0.306537
1.64	525	1.94	525	0.75	525	1.61	525	0.01	525	0.41	525	1.2	525	0.05	525	0.83	525	-1.17	525	-1.89	525	0.88	525	0.11	525	18.6395	525	0.49	0.305018
1.65	525	1.76	525	0.3	525	1.79	525	0.13	525	0.25	525	1.11	525	0.33	525	0.76	525	-1.08	525	-2.03	525	1.02	525	0.17	525	18.6495	525	0.473846	0.305399
1.45	525	1.75	525	1.01	525	1.42	525	0.08	525	0.48	525	0.78	525	0	525	0.79	525	-1.42	525	-1.64	525	1.27	525	0.32	525	18.6595	525	0.483846	0.289215
1.46	525	1.89	525	0.63	525	1.27	525	-0.38	525	0.34	525	0.45	525	0.22	525	1.07	525	-1.73	525	-1.88	525	1.27	525	0.26	525	18.6695	525	0.374615	0.317772
1.24	525	1.93	525	0.33	525	1.44	525	-0.59	525	0.6	525	0.45	525	0.19	525	0.69	525	-1.45	525	-2.17	525	1.22	525	0.55	525	18.6796	525	0.340769	0.319861
1.57	525	2.19	525	0.15	525	1.55	525	-0.71	525	0.21	525	0.26	525	0.09	525	0.83	525	-0.51	525	-2.15	525	0.85	525	0.5	525	18.6896	525	0.371538	0.3107
1.31	525	2.06	525	0.34	525	1.31	525	-0.73	525	0.05	525	0.32	525	0.14	525	0.94	525	-0.19	525	-1.98	525	0.79	525	0.43	525	18.6996	525	0.368462	0.281172
0.99	525	1.93	525	0.76	525	1.19	525	-0.8	525	0.31	525	0.87	525	0.08	525	0.74	525	0.08	525	-1.6	525	0.9	525	0.62	525	18.7096	525	0.466923	0.249002
1.26	525	1.97	525	1.02	525	1.63	525	-0.53	525	0.4	525	1.49	525	-0.01	525	0.96	525	-0.48	525	-1.52	525	1.16	525	0.33	525	18.7196	525	0.590769	0.279728
1.56	525	2.19	525	0.84	525	1.09	525	-0.49	525	0.36	525	1.31	525	0.08	525	1.09	525	0.11	525	-1.73	525	1.19	525	0.38	525	18.7296	525	0.613846	0.278166
1.77	525	2.17	525	0.65	525	0.65	525	0.1	525	0.44	525	0.54	525	0.08	525	1.46	525	-0.17	525	-2.03	525	1.18	525	0.61	525	18.7396	525	0.573077	0.288285
1.43	525	2.13	525	1.34	525	0.69	525	0.01	525	0.35	525	-0.3	525	0.09	525	1.37	525	-0.33	525	-1.9	525	1.22	525	0.42	525	18.7497	525	0.501538	0.289393
1.27	525	1.66	525	0.73	525	0.52	525	-0.37	525	0.39	525	-0.07	525	0.49	525	1.07	525	-0.86	525	-1.97	525	1.2	525	0.51	525	18.7597	525	0.351538	0.272274
1.1	525	1.48	525	0.59	525	0.67	525	-0.38	525	0.38	525	0.79	525	0.28	525	0.86	525	-1.15	525	-2.27	525	1.11	525	0.59	525	18.7697	525	0.311538	0.285574
0.76	525	1.66	525	-0.19	525	1.01	525	-0.26	525	0.38	525	0.79	525	0.48	525	1.02	525	-0.57	525	-2.07	525	1.1	525	0.37	525	18.7797	525	0.344615	0.264443
1.12	525	1.95	525	0.19	525	0.16	525	-0.38	525	0.45	525	1.11	525	0.35	525	0.99	525	-0.88	525	-1.97	525	1.21	525	0.42	525	18.7897	525	0.363077	0.281733
0.87	525	1.71	525	0.48	525	0	525	-0.16	525	0.6	525	1.46	525	0.4	525	1.42	525	-0.27	525	-1.72	525	0.66	525	0.35	525	18.7997	525	0.446154	0.248156
0.59	525	1.96	525	0.03	525	0.11	525	-0.26	525	0.48	525	1.51	525	-0.2	525	1.22	525	0.21	525	-1.96	525	0.21	525	0.18	525	18.8098	525	0.313846	0.265433
0.85	525	1.63	525	0.03	525	0.27	525	-0.25	525	0.62	525	1.09	525	-0.03	525	1.05	525	0.02	525	-1.85	525	0.59	525	0.49	525	18.8198	525	0.346923	0.235313
1.04	525	1.52	525	0.33	525	-0.03	525	-0.27	525	0.47	525	0.6	525	0.03	525	0.84	525	0.16	525	-1.95	525	0.33	525	0.14	525	18.8298	525	0.246923	0.226824
0.93	525	1.29	525	0.75	525	0.58	525	-0.08	525	0.54	525	1.17	525	0.2	525	0.61	525	-0.22	525	-2.01	525	0.62	525	0.11	525	18.8398	525	0.345385	0.232615
1.25	525	1.55	525	0.52	525	0.57	525	-0.13	525	0.42	525	1.24	525	0.07	525	0.42	525	-0.71	525	-1.94	525	0.73	525	0.35	525	18.8498	525	0.333846	0.252509
1.6	525	1.47	525	1.34	525	1.01	525	-0.34	525	0.3	525	0.72	525	0.14	525	0.96	525	-0.38	525	-1.99	525	0.76	525	0.31	525	18.8598	525	0.453846	0.269167
1.85	525	1.39	525	1.16	525	1.08	525	0.21	525	0.32	525	-0.09	525	0.17	525	0.85	525	-0.61	525	-2.19	525	0.84	525	0.49	525	18.8699	525	0.420769	0.284029
1.19	525	1.59	525	1.62	525	1.29	525	-0.29	525	0.28	525	-0.14	525	-0.04	525	0.99	525	-0.59	525	-1.82	525	0.9	525	0.61	525	18.8799	525	0.43	0.275441
0.96	525	1.82	525	1.13	525	1.62	525	-0.04	525	0.58	525	0.19	525	0.17	525	0.75	525	-0.04	525	-1.4	525	1.01	525	0.44	525	18.8899	525	0.553077	0.230655
0.61	525	1.98	525	0.87	525	1.53	525	-0.21	525	0.1	525	0.11	525	0.14	525	1.07	525	-0.76	525	-1.66	525	0.78	525	0.62	525	18.8999	525	0.398462	0.264126
0.54	525	2.02	525	0.96	525	1.51	525	0.13	525	0.02	525	0.6	525	0.16	525	1.35	525	-0.94	525	-1.77	525	0.91	525	0.46	525	18.9099	525	0.457692	0.278872
0.9	525	2.05	525	1.21	525	1.99	525	-0.2	525	0.04	525	0.73	525	0.11	525	0.92	525	-0.36	525	-1.72	525	0.64	525	0.61	525	18.9199	525	0.532308	0.277995
0.96	525	2.18	525	1.58	525	1.91	525	-0.34	525	0.13	525	0.94	525	0.04	525	1.03	525	-1.36	525	-1.77	525	0.69	525	0.37	525	18.9299	525	0.489231	0.324048
1.09	525	2.07	525	0.83	525	1.84	525	0.04	525	0.33	525	1.36	525	-0.03	525	0.61	525	-1.64	525	-1.7	525	1.01	525	0.4	525	18.94	525	0.477692	0.316975
1.02	525	1.89	525	1	525	1.54	525	-0.26	525	0.22	525	2.27	525	-0.15	525	0.66	525	-0.97	525	-1.78	525	0.77	525	0.32	525	18.95	525	0.502308	0.312513
0.98	525	1.98	525	0.86	525	1.45	525	0.05	525	0.16	525	1.47	525	0.19	525	0.74	525	-1.23	525	-1.55	525	0.82	525	0.57	525	18.96	525	0.499231	0.279288
1.29	525	2.42	525	1.03	525	1.38	525	-0.09	525	0.11	525	1.37	525	0.03	525	0.72	525	-1.19	525	-1.34	525	1.01	525	0.65	525	18.97	525	0.568462	0.292596
0.65	525	2.18	525	0.8	525	1.63	525	-0.19	525	0.32	525	1.31	525	0.15	525	0.41	525	-1.29	525	-1.64	525	1.1	525	0.57	525	18.98	525	0.461538	0.295656
1.02	525	2.06	525	0.69	525	1.64	525	-0.13	525	0.5	525	1.46	525	-0.09	525	0.66	525	-1.06	525	-1.75	525	0.82	525	0.47	525	18.99	525	0.483846	0.292293
0.92	525	1.8	525	0.85	525	1.48	525	0.14	525	0.31	525	1.02	525	0.01	525	0.97	525	-0.47	525	-1.75	525	0.77	525	0.31	525	19.0001	525	0.489231	0.252644
1.01	525	1.88	525	0.78	525	1.55	525	-0.17	525	0.38	525	0.85	525	0.44	525	0.62	525	-0.45	525	-2.21	525	1.24	525	0.41	525	19.0101	525	0.486923	0.285878
0.84	525	2.13	525	0.98	525	1.87	525	-0.33	525	0.4	525	0.86	525	0.19	525	0.96	525	-0.2	525	-2.43	525	1.28	525	0.4	525	19.0201	525	0.534615	0.317176
0.86	525	2.04	525	0.93	525	2.23	525	-0.43	525	0.26	525	1.06	525	0.35	525	0.9	525	-0.08	525	-2.18	525	0.86	525	0.44	525	19.0301	525	0.556923	0.307048
0.96	525	2.13	525	1.21	525	2.48	525	-0.58	525	0.48	525	0.56	525	0.28	525	0.8	525	-0.03	525	-2.03	525	1.16	525	0.44	525	19.0401	525	0.604615	0.31603
1.05	525	2.13	525	0.82	525	2.32	525	-0.18	525	0.63	525	0.02	525	0.14	525	0.87	525	0.19	525	-1.86	525	0.94	525	0.43	525	19.0501	525	0.576923	0.2902
1.22	525	1.96	525	0.96	525	2.63	525	-0.07	525	0.33	525	0.05	525	-0.13	525	1.02	525	0.23	525	-1.65	525	0.82	525	0.28	525	19.0602	525	0.588462	0.292717
0.86	525	2.09	525	0.84	525	2.2	525	-0.34	525	0.05	525	0.43	525	0.07	525	0.68	525	0.91	525	-1.89	525	0.61	525	0.54	525	19.0702	525	0.542308	0.284923
0.91	525	1.88	525	0.43	525	2	525	-0.4	525	-0.01	525	0.86	525	-0.12	525	0.63	525	-0.2	525	-1.86	525	0.91	525	0.56	525	19.0802	525	0.43	0.278457
1.24	525	1.63	525	0.28	525	1.08	525	-0.16	525	0.23	525	1.46	525	0.13	525	1.07	525	-0.6	525	-1.73	525	0.74	525	0.38	525	19.0902	525	0.442308	0.257115
1.41	525	2.12	525	0.16	525	0.76	525	-0.2	525	0	525	1.75	525	0.23	525	1.25	525	-1.77	525	-1.72	525	0.88	525	0.32	525	19.1002	525	0.399231	0.327184
0.95	525	2.43	525	0.69	525	1.02	525	-0.38	525	0.58	525	1.59	525	0.2	525	1.39	525	-1.24	525	-1.61	525	0.78	525	0.45	525	19.1102	525	0.526923	0.306302
0.91	525	2	525	0.67	525	1.03	525	-0.1	525	0.41	525	1.75	525	0.15	525	1.06	525	-0.77	525	-1.6	525	0.89	525	0.67	525	19.1202	525	0.543846	0.268824
1.04	525	2.16	525	0.73	525	0.8	525	0.04	525	0.01	525	1.52	525	-0.23	525	0.69	525	-0.7	525	-1.49	525	0.95	525	0.54	525	19.1303	525	0.466154	0.26361
1.34	525	2.11	525	0.49	525	0.62	525	-0.46	525	0.61	525	0.83	525	-0.13	525	0.96	525	-0.12	525	-1.47	525	0.47	525	0.71	525	19.1403	525	0.458462	0.243521
1.84	525	2.01	525	0.34	525	0.58	525	-0.07	525	0.75	525	0.8	525	-0.09	525	1.58	525	-0.36	525	-2.07	525	0.39	525	0.59	525	19.1503	525	0.483846	0.293748
2.05	525	1.4	525	0.55	525	0.36	525	-0.09	525	0.72	525	1.01	525	0.12	525	0.7	525	-0.38	525	-1.83	525	0.59	525	0.81	525	19.1603	525	0.462308	0.257759
1.67	525	1.7	525	0.65	525	0.39	525	0.05	525	0.49	525	0.64	525	-0.09	525	0.75	525	-0.7	525	-1.98	525	0.72	525	0.48	525	19.1703	525	0.366923	0.264154
1.23	525	1.98	525	0.46	525	0.42	525	0.12	525	0.65	525	0.69	525	0.29	525	0.55	525	-0.16	525	-2.13	525	0.68	525	0.48	525	19.1803	525	0.404615	0.256304
1.46	525	1.96	525	0.58	525	0.26	525	-0.02	525	0.38	525	0.93	525	0.47	525	0.58	525	-0.13	525	-1.99	525	0.55	525	0.36	525	19.1904	525	0.414615	0.254681
1.59	525	1.37	525	0.55	525	-0.3	525	-0.09	525	0.43	525	0.97	525	0.19	525	0.91	525	-0.8	525	-1.73	525	0.6	525	0.57	525	19.2004	525	0.327692	0.249582
1.31	525	1.25	525	0.5	525	0.09	525	-0.39	525	0.34	525	0.66	525	0.08	525	1.73	525	-0.65	525	-1.79	525	0.69	525	0.91	525	19.2104	525	0.363846	0.258808
0.98	525	1.62	525	-0.06	525	0.1	525	-0.55	525	0.2	525	0.78	525	0.27	525	1.38	525	-0.83	525	-1.8	525	0.8	525	0.87	525	19.2204	525	0.289231	0.262689
1.1	525	1.74	525	-0.11	525	-0.03	525	-0.18	525	0.56	525	1.11	525	0.22	525	0.78	525	-0.12	525	-1.87	525	0.67	525	0.56	525	19.2304	525	0.340769	0.243501
1.48	525	2	525	-0.04	525	0.09	525	-0.28	525	0.17	525	1.16	525	0.11	525	0.81	525	0.12	525	-1.54	525	1.02	525	0.31	525	19.2404	525	0.416154	0.24797
1.96	525	1.83	525	-0.27	525	0.04	525	-0.43	525	0.22	525	1.16	525	0.11	525	0.97	525	-0.14	525	-1.93	525	0.87	525	0.31	525	19.2505	525	0.361538	0.285271
2.1	525	1.91	525	0.2	525	-0.07	525	-0.17	525	0.65	525	0.71	525	-0.11	525	1.05	525	-0.34	525	-1.99	525	0.83	525	0.65	525	19.2605	525	0.416923	0.289789
1.99	525	1.81	525	0.43	525	-0.13	525	-0.07	525	0.23	525	0.32	525	-0.14	525	0.98	525	0.15	525	-1.88	525	0.73	525	0.48	525	19.2705	525	0.376923	0.266163
1.98	525	1.04	525	-0.09	525	0.43	525	-0.06	525	0.22	525	0.61	525	0.18	525	1.22	525	-0.14	525	-2.02	525	0.97	525	0.29	525	19.2805	525	0.356154	0.260865
2.17	525	0.87	525	0.12	525	1.4	525	-0.31	525	0.29	525	1.35	525	-0.06	525	0.91	525	0.19	525	-1.93	525	1.33	525	0.23	525	19.2905	525	0.504615	0.283602
2.55	525	0.96	525	-0.05	525	1.17	525	-0.15	525	0.09	525	1.53	525	0.2	525	0.97	525	-0.7	525	-2	525	1.31	525	-0.08	525	19.3005	525	0.446154	0.317973
2.23	525	1.37	525	0.2	525	1.71	525	-0.07	525	0.16	525	0.93	525	0.16	525	1.12	525	-0.29	525	-2.2	525	1.01	525	0.27	525	19.3106	525	0.507692	0.306507
1.91	525	1.54	525	0.14	525	1.72	525	-0.24	525	0.3	525	0.41	525	0	525	0.45	525	-1.21	525	-2.01	525	0.77	525	0.4	525	19.3206	525	0.321538	0.304127
1.82	525	1.64	525	0.91	525	1.32	525	0.23	525	0.12	525	0.52	525	0.12	525	0.48	525	-1.45	525	-2	525	1.01	525	0.38	525	19.3306	525	0.392308	0.304046
1.76	525	1.79	525	0.49	525	1.18	525	-0.46	525	0.1	525	0.51	525	0.27	525	0.64	525	-1.17	525	-1.92	525	1.18	525	0.53	525	19.3406	525	0.376923	0.29721
1.67	525	1.9	525	0.59	525	1.49	525	-0.27	525	-0.14	525	0.76	525	0.29	525	0.68	525	-0.95	525	-1.95	525	1.44	525	0.53	525	19.3506	525	0.464615	0.304211
1.96	525	1.85	525	0.74	525	1.69	525	-0.36	525	-0.09	525	0.95	525	0.54	525	0.45	525	-0.63	525	-1.68	525	0.96	525	0.26	525	19.3606	525	0.510769	0.288887
2	525	1.99	525	0.51	525	1.58	525	-0.4	525	0.14	525	0.93	525	0.38	525	1	525	-0.74	525	-1.63	525	1.11	525	0.23	525	19.3706	525	0.546154	0.294363
2.59	525	1.41	525	0.82	525	1.68	525	-0.16	525	0.04	525	0.86	525	0.1	525	0.82	525	-0.78	525	-1.53	525	1.25	525	0.34	525	19.3807	525	0.572308	0.299675
2.39	525	1.54	525	0.31	525	1.17	525	0.04	525	0.09	525	0.49	525	0.16	525	0.73	525	-0.95	525	-1.45	525	0.76	525	0.28	525	19.3907	525	0.427692	0.273159
2.2	525	1.22	525	0.59	525	1.89	525	-0.05	525	0.31	525	0.53	525	0.24	525	0.69	525	-0.67	525	-1.5	525	0.8	525	0.34	525	19.4007	525	0.506923	0.268849
1.86	525	1.55	525	0.3	525	1.29	525	-0.53	525	0.33	525	0.64	525	0.21	525	0.67	525	-0.68	525	-1.82	525	1.13	525	0.56	525	19.4107	525	0.423846	0.276639
2	525	1.43	525	0.5	525	1.51	525	-0.06	525	0.49	525	0.82	525	0.28	525	0.55	525	-1.01	525	-1.79	525	0.72	525	0.69	525	19.4207	525	0.471538	0.279654
2.3	525	1.3	525	0.29	525	1.41	525	-0.12	525	0.44	525	0.78	525	0.13	525	0.84	525	-0.96	525	-1.72	525	0.83	525	0.5	525	19.4307	525	0.463077	0.28445
2.74	525	1.84	525	0.39	525	1.58	525	-0.21	525	0.21	525	0.96	525	0.11	525	0.57	525	-1.53	525	-1.97	525	1.06	525	0.27	525	19.4408	525	0.463077	0.353726
2.71	525	1.58	525	0.1	525	1.51	525	-0.31	525	0.49	525	0.75	525	0.19	525	0.37	525	-0.92	525	-2.09	525	0.32	525	0.4	525	19.4508	525	0.392308	0.326976
2.43	525	1.2	525	-0.48	525	1.68	525	-0.78	525	0.27	525	1.12	525	0.4	525	0.48	525	-1.01	525	-2.16	525	0.29	525	0.38	525	19.4608	525	0.293846	0.33508
2.43	525	1.9	525	-0.24	525	1.75	525	-0.6	525	0.07	525	0.72	525	0.34	525	0.29	525	-1.14	525	-2.14	525	0.51	525	0.15	525	19.4708	525	0.310769	0.345524
1.94	525	1.96	525	0	525	1.36	525	-0.04	525	0.49	525	0.16	525	0.23	525	0.74	525	-1.21	525	-1.95	525	0.29	525	0.35	525	19.4808	525	0.332308	0.303402
2.01	525	1.79	525	-0.19	525	1	525	-0.02	525	0.33	525	0.18	525	0.12	525	0.53	525	-1	525	-2.06	525	0.29	525	0.49	525	19.4908	525	0.266923	0.292633
2.54	525	1.57	525	0.28	525	0.75	525	0.01	525	0.65	525	0.61	525	0.06	525	0.67	525	-0.64	525	-2.26	525	0.75	525	0.47	525	19.5009	525	0.42	0.308137
2.73	525	1.51	525	0.09	525	0.78	525	0	525	0.15	525	0.6	525	0.21	525	0.99	525	-0.83	525	-2.07	525	0.26	525	0.56	525	19.5109	525	0.383077	0.312183
2.58	525	1.88	525	0.73	525	0.79	525	-0.57	525	0.06	525	0.85	525	0.11	525	0.83	525	-0.81	525	-2.18	525	0.28	525	0.83	525	19.5209	525	0.413846	0.330589
2.49	525	1.73	525	0.34	525	0.7	525	-0.38	525	0.13	525	0.76	525	0.12	525	0.67	525	-0.98	525	-2.06	525	0.04	525	0.76	525	19.5309	525	0.332308	0.313668
2.52	525	1.61	525	0.45	525	0.81	525	-0.21	525	0.16	525	0.63	525	0.21	525	0.7	525	-1.48	525	-2.07	525	0.39	525	0.17	525	19.5409	525	0.299231	0.323186
2.82	525	1.85	525	0.4	525	1.03	525	-0.29	525	0.23	525	0.61	525	0.26	525	0.85	525	-1.66	525	-1.98	525	0.33	525	0.29	525	19.5509	525	0.364615	0.349319
2.84	525	1.67	525	0.15	525	0.61	525	-0.6	525	0.18	525	1.33	525	0.09	525	0.99	525	-0.83	525	-2.09	525	-0.01	525	0.44	525	19.5609	525	0.366923	0.338729
2.72	525	1.5	525	0.28	525	0.99	525	-0.7	525	-0.06	525	1.74	525	0.32	525	0.98	525	-1.25	525	-1.92	525	0.38	525	0.45	525	19.571	525	0.417692	0.345471
2.9	525	1.52	525	0.06	525	0.87	525	-0.47	525	-0.1	525	1.89	525	0.17	525	0.77	525	-1.17	525	-1.79	525	0.18	525	0.11	525	19.581	525	0.38	0.345725
2.96	525	1.54	525	0.2	525	0.9	525	-0.44	525	0.2	525	1.54	525	0.32	525	0.47	525	-0.52	525	-1.87	525	0.36	525	0.44	525	19.591	525	0.469231	0.321653
3.15	525	1.64	525	0.03	525	0.69	525	-0.68	525	0.22	525	1.1	525	0.26	525	0.78	525	-0.68	525	-2.31	525	0.78	525	0.44	525	19.601	525	0.416923	0.356503
2.8	525	1.78	525	-0.19	525	0.35	525	-0.63	525	0.38	525	0.81	525	-0.05	525	0.61	525	-0.49	525	-2.06	525	1.09	525	0.2	525	19.611	525	0.353846	0.328391
2.63	525	1.48	525	-0.04	525	0.41	525	-0.23	525	0.41	525	1.03	525	0.06	525	0.55	525	-0.62	525	-1.97	525	0.87	525	0.33	525	19.621	525	0.377692	0.301084
2.3	525	1.63	525	-0.02	525	0.62	525	0.03	525	0.47	525	1.32	525	0.26	525	0.96	525	-0.7	525	-2.12	525	0.41	525	0.23	525	19.6311	525	0.414615	0.302296
2.27	525	1.24	525	-0.21	525	1.09	525	0.34	525	0.44	525	1.4	525	0.18	525	1.04	525	-1.08	525	-1.95	525	0.11	525	0.14	525	19.6411	525	0.385385	0.303566
2.28	525	1.4	525	0.12	525	0.2	525	0.07	525	0.12	525	2.25	525	0.09	525	0.29	525	-0.74	525	-2.18	525	0.41	525	0.49	525	19.6511	525	0.369231	0.32347
2.4	525	1.6	525	0.33	525	0.52	525	0.03	525	0.31	525	2.12	525	0.22	525	0.59	525	-1.12	525	-2.21	525	0.52	525	0.48	525	19.6611	525	0.445385	0.337294
1.75	525	1.36	525	0.97	525	0.7	525	-0.39	525	0.54	525	1.69	525	0.22	525	0.25	525	-0.89	525	-2.14	525	0.62	525	0.15	525	19.6711	525	0.371538	0.296753
1.51	525	1.41	525	0.62	525	1.1	525	-1.08	525	0.49	525	1.13	525	0.42	525	0.48	525	-1.03	525	-2.2	525	0.46	525	0.12	525	19.6811	525	0.263846	0.301436
1.94	525	1.33	525	0.6	525	0.98	525	-0.93	525	0.31	525	1.02	525	0.14	525	0.67	525	-1.12	525	-2.15	525	0.5	525	0.19	525	19.6912	525	0.267692	0.305445
2.71	525	1.62	525	0.56	525	0.94	525	-0.8	525	-0.05	525	1.32	525	0.19	525	0.56	525	-1	525	-2.05	525	0.66	525	0.03	525	19.7012	525	0.360769	0.338239
2.15	525	1.64	525	0.95	525	1.03	525	-0.18	525	0.28	525	1.24	525	0.1	525	0.83	525	0.04	525	-1.59	525	0.73	525	0.17	525	19.7112	525	0.568462	0.259602
2.57	525	1.54	525	0.22	525	1.52	525	-0.84	525	0.23	525	1.48	525	0.2	525	0.56	525	0.25	525	-1.62	525	0.76	525	0.03	525	19.7212	525	0.530769	0.302139
2.44	525	1.48	525	0.21	525	1.48	525	-0.58	525	0.1	525	1.59	525	0.08	525	0.68	525	0.31	525	-1.35	525	0.82	525	0.18	525	19.7312	525	0.572308	0.278356
2.76	525	1.41	525	0.2	525	1.64	525	-0.81	525	-0.04	525	1.26	525	-0.08	525	0.4	525	-0.02	525	-1.63	525	0.79	525	0	525	19.7412	525	0.452308	0.313876
2.94	525	1.17	525	0.41	525	1.61	525	-0.99	525	0.3	525	0.24	525	0.33	525	0.55	525	-0.04	525	-1.69	525	0.75	525	0.3	525	19.7512	525	0.452308	0.311761
2.9	525	1.34	525	-0.01	525	1.62	525	-0.5	525	-0.02	525	0.25	525	0.09	525	0.22	525	0.2	525	-1.99	525	0.62	525	0.43	525	19.7613	525	0.396154	0.31753
2.76	525	1.41	525	-0.11	525	1.46	525	-0.44	525	0.69	525	0.25	525	0.09	525	0.66	525	0.17	525	-2.36	525	0.53	525	0.52	525	19.7713	525	0.433077	0.326568
2.61	525	1.81	525	0.44	525	1.65	525	-0.63	525	0.62	525	0.42	525	-0.21	525	1.03	525	0.39	525	-2.39	525	0.52	525	0.68	525	19.7813	525	0.533846	0.339297
2.55	525	1.69	525	0.79	525	2.45	525	-0.77	525	0.38	525	0.46	525	-0.07	525	0.7	525	-0.03	525	-2.34	525	0.54	525	0.7	525	19.7913	525	0.542308	0.356836
2.79	525	1.75	525	0.86	525	1.88	525	-0.36	525	0.32	525	0.5	525	0	525	0.88	525	0.06	525	-2.45	525	0.72	525	0.53	525	19.8013	525	0.575385	0.347874
2.66	525	2.03	525	1.03	525	2.36	525	-0.15	525	0.39	525	0.54	525	0.21	525	0.73	525	-0.49	525	-2.49	525	0.59	525	0.57	525	19.8113	525	0.613846	0.367641
2.52	525	1.57	525	0.51	525	2.01	525	-0.6	525	0.08	525	0.81	525	0.41	525	0.98	525	-1.3	525	-2.22	525	0.82	525	0.23	525	19.8214	525	0.447692	0.358099
3.08	525	1.56	525	0.17	525	2	525	-0.07	525	0.28	525	0.62	525	0.25	525	0.91	525	-1.66	525	-1.9	525	0.8	525	0.24	525	19.8314	525	0.483077	0.369829
2.71	525	1.58	525	0.23	525	1.91	525	-0.6	525	0.21	525	0.36	525	0.08	525	0.62	525	-1.07	525	-1.9	525	1	525	0.13	525	19.8414	525	0.404615	0.340715
2.9	525	1.94	525	0.35	525	1.81	525	-0.7	525	0.09	525	0.36	525	0.08	525	1.08	525	-1.17	525	-1.82	525	0.76	525	0.23	525	19.8514	525	0.454615	0.358037
2.69	525	1.79	525	0.39	525	2.18	525	-0.39	525	0.35	525	0.28	525	-0.01	525	0.72	525	-1.07	525	-2.09	525	0.55	525	0.51	525	19.8614	525	0.453846	0.354586
2.75	525	1.71	525	0.65	525	2.09	525	-0.5	525	0.61	525	0.49	525	-0.08	525	1.02	525	-0.66	525	-2.3	525	0.62	525	0.42	525	19.8714	525	0.524615	0.357114
2.67	525	1.44	525	0.42	525	2.04	525	-0.5	525	0.17	525	0.44	525	0.2	525	0.42	525	-0.75	525	-2.16	525	0.98	525	0.53	525	19.8815	525	0.453846	0.339882
2.66	525	1.64	525	0.69	525	1.57	525	-0.52	525	0.42	525	0.61	525	0.02	525	0.66	525	-0.92	525	-2.14	525	1.38	525	0.3	525	19.8915	525	0.49	0.342129
2.36	525	1.67	525	1.19	525	1.16	525	-0.73	525	0.57	525	0.69	525	0.26	525	0.59	525	-0.87	525	-1.94	525	0.84	525	0.34	525	19.9015	525	0.471538	0.313387
2.77	525	1.67	525	1.38	525	1.44	525	-0.36	525	0.66	525	1.41	525	0.31	525	1.08	525	-0.39	525	-2.14	525	0.87	525	0.61	525	19.9115	525	0.716154	0.334443
2.6	525	1.5	525	0.82	525	1.49	525	-0.04	525	0.63	525	1.53	525	0.2	525	0.82	525	-0.09	525	-2.39	525	0.62	525	0.29	525	19.9215	525	0.613846	0.326643
1.95	525	1.23	525	0.94	525	1.02	525	-0.41	525	0.24	525	0.95	525	0.03	525	1.14	525	-0.4	525	-2.6	525	0.75	525	0.28	525	19.9315	525	0.393846	0.312276
2.27	525	1.42	525	0.49	525	1.46	525	-0.3	525	0.11	525	0.38	525	0.33	525	0.69	525	-0.85	525	-2.01	525	0.8	525	0.43	525	19.9415	525	0.401538	0.298113
2.65	525	1.52	525	0.65	525	1.49	525	-0.29	525	0.13	525	0.48	525	0.14	525	0.71	525	-0.98	525	-2.3	525	0.63	525	0.5	525	19.9516	525	0.41	0.335339
2.73	525	1.78	525	0.3	525	1.24	525	-0.42	525	0.34	525	-0.01	525	0.13	525	0.98	525	-1.23	525	-2.42	525	0.56	525	0.49	525	19.9616	525	0.343846	0.3572
2.05	525	1.32	525	-0.66	525	1.28	525	-0.39	525	0.42	525	0.46	525	-0.04	525	1.24	525	-1.29	525	-2.35	525	0.48	525	0.42	525	19.9716	525	0.226154	0.330372
1.76	525	1.99	525	-0.05	525	1.14	525	-0.63	525	0.77	525	0.94	525	-0.35	525	0.9	525	-0.85	525	-2.01	525	0.36	525	0.29	525	19.9816	525	0.327692	0.307451
1.97	525	1.77	525	0.66	525	0.69	525	-0.76	525	0.69	525	1.33	525	-0.16	525	0.64	525	-1.06	525	-2.14	525	0.29	525	0.34	525	19.9916	525	0.327692	0.317141
2.02	525	1.66	525	0.65	525	0.61	525	-0.8	525	0.9	525	1.56	525	-0.06	525	0.58	525	-1.07	525	-2.16	525	0.51	525	0.22	525	20.0016	525	0.355385	0.323555
2.18	525	1.55	525	0.59	525	0.45	525	-0.71	525	0.69	525	1.66	525	-0.16	525	0.88	525	-1.27	525	-2.32	525	0.82	525	0.01	525	20.0117	525	0.336154	0.343811
2.3	525	1.3	525	0.4	525	0.72	525	-1.05	525	0.33	525	1.69	525	-0.01	525	1.02	525	-1.19	525	-2.3	525	0.75	525	0.18	525	20.0217	525	0.318462	0.346678
[truncated: 336 more rows]

## Sheet: ED Figure 9C
dF/F0_bleach_correct	Wavelength	dF/F0_bleach_correct	Wavelength	dF/F0_bleach_correct	Wavelength	dF/F0_bleach_correct	Wavelength	Time	Wavelength	Mean DF/F0	SEM
0	525	0	525	0	525	0	525	0.01	525	0	0
0	525	0	525	0	525	0	525	0.02	525	0	0
0	525	0	525	0	525	0	525	0.03	525	0	0
0	525	0	525	0	525	0	525	0.0401	525	0	0
0	525	0	525	0	525	0	525	0.0501	525	0	0
0	525	0	525	0	525	0	525	0.0601	525	0	0
0	525	0	525	0	525	0	525	0.0701	525	0	0
0	525	0	525	0	525	0	525	0.0801	525	0	0
0	525	0	525	0	525	0	525	0.0901	525	0	0
0	525	0	525	0	525	0	525	0.1002	525	0	0
0	525	0	525	0	525	0	525	0.1102	525	0	0
0	525	0	525	0	525	0	525	0.1202	525	0	0
0	525	0	525	0	525	0	525	0.1302	525	0	0
0	525	0	525	0	525	0	525	0.1402	525	0	0
0	525	0	525	0	525	0	525	0.1502	525	0	0
0	525	0	525	0	525	0	525	0.1603	525	0	0
0	525	0	525	0	525	0	525	0.1703	525	0	0
0	525	0	525	0	525	0	525	0.1803	525	0	0
0	525	0	525	0	525	0	525	0.1903	525	0	0
0	525	0	525	0	525	0	525	0.2003	525	0	0
0	525	0	525	0	525	0	525	0.2103	525	0	0
0	525	0	525	0	525	0	525	0.2203	525	0	0
0	525	0	525	0	525	0	525	0.2304	525	0	0
0	525	0	525	0	525	0	525	0.2404	525	0	0
0	525	0	525	0	525	0	525	0.2504	525	0	0
0	525	0	525	0	525	0	525	0.2604	525	0	0
0	525	0	525	0	525	0	525	0.2704	525	0	0
0	525	0	525	0	525	0	525	0.2804	525	0	0
0	525	0	525	0	525	0	525	0.2905	525	0	0
0	525	0	525	0	525	0	525	0.3005	525	0	0
0	525	0	525	0	525	0	525	0.3105	525	0	0
0	525	0	525	0	525	0	525	0.3205	525	0	0
0	525	0	525	0	525	0	525	0.3305	525	0	0
0	525	0	525	0	525	0	525	0.3405	525	0	0
0	525	0	525	0	525	0	525	0.3506	525	0	0
0	525	0	525	0	525	0	525	0.3606	525	0	0
0	525	0	525	0	525	0	525	0.3706	525	0	0
0	525	0	525	0	525	0	525	0.3806	525	0	0
0	525	0	525	0	525	0	525	0.3906	525	0	0
0	525	0	525	0	525	0	525	0.4006	525	0	0
0	525	0	525	0	525	0	525	0.4106	525	0	0
0	525	0	525	0	525	0	525	0.4207	525	0	0
0	525	0	525	0	525	0	525	0.4307	525	0	0
0	525	0	525	0	525	0	525	0.4407	525	0	0
0	525	0	525	0	525	0	525	0.4507	525	0	0
0	525	0	525	0	525	0	525	0.4607	525	0	0
0	525	0	525	0	525	0	525	0.4707	525	0	0
0	525	0	525	0	525	0	525	0.4808	525	0	0
0	525	0	525	0	525	0	525	0.4908	525	0	0
0	525	0	525	0	525	0	525	0.5008	525	0	0
0	525	0	525	0	525	0	525	0.5108	525	0	0
0	525	0	525	0	525	0	525	0.5208	525	0	0
0	525	0	525	0	525	0	525	0.5308	525	0	0
0	525	0	525	0	525	0	525	0.5409	525	0	0
0	525	0	525	0	525	0	525	0.5509	525	0	0
0	525	0	525	0	525	0	525	0.5609	525	0	0
0	525	0	525	0	525	0	525	0.5709	525	0	0
0	525	0	525	0	525	0	525	0.5809	525	0	0
0	525	0	525	0	525	0	525	0.5909	525	0	0
0	525	0	525	0	525	0	525	0.601	525	0	0
0	525	0	525	0	525	0	525	0.611	525	0	0
0	525	0	525	0	525	0	525	0.621	525	0	0
0	525	0	525	0	525	0	525	0.631	525	0	0
0	525	0	525	0	525	0	525	0.641	525	0	0
0	525	0	525	0	525	0	525	0.651	525	0	0
0	525	0	525	0	525	0	525	0.661	525	0	0
0	525	0	525	0	525	0	525	0.6711	525	0	0
0	525	0	525	0	525	0	525	0.6811	525	0	0
0	525	0	525	0	525	0	525	0.6911	525	0	0
0	525	0	525	0	525	0	525	0.7011	525	0	0
0	525	0	525	0	525	0	525	0.7111	525	0	0
0	525	0	525	0	525	0	525	0.7211	525	0	0
0	525	0	525	0	525	0	525	0.7312	525	0	0
0	525	0	525	0	525	0	525	0.7412	525	0	0
0	525	0	525	0	525	0	525	0.7512	525	0	0
0	525	0	525	0	525	0	525	0.7612	525	0	0
0	525	0	525	0	525	0	525	0.7712	525	0	0
0	525	0	525	0	525	0	525	0.7812	525	0	0
0	525	0	525	0	525	0	525	0.7913	525	0	0
0	525	0	525	0	525	0	525	0.8013	525	0	0
0	525	0	525	0	525	0	525	0.8113	525	0	0
0	525	0	525	0	525	0	525	0.8213	525	0	0
0	525	0	525	0	525	0	525	0.8313	525	0	0
0	525	0	525	0	525	0	525	0.8413	525	0	0
0	525	0	525	0	525	0	525	0.8513	525	0	0
0	525	0	525	0	525	0	525	0.8614	525	0	0
0	525	0	525	0	525	0	525	0.8714	525	0	0
0	525	0	525	0	525	0	525	0.8814	525	0	0
0	525	0	525	0	525	0	525	0.8914	525	0	0
0	525	0	525	0	525	0	525	0.9014	525	0	0
0	525	0	525	0	525	0	525	0.9114	525	0	0
0	525	0	525	0	525	0	525	0.9215	525	0	0
0	525	0	525	0	525	0	525	0.9315	525	0	0
0	525	0	525	0	525	0	525	0.9415	525	0	0
0	525	0	525	0	525	0	525	0.9515	525	0	0
0	525	0	525	0	525	0	525	0.9615	525	0	0
0	525	0	525	0	525	0	525	0.9715	525	0	0
0	525	0	525	0	525	0	525	0.9816	525	0	0
0	525	0	525	0	525	0	525	0.9916	525	0	0
0	525	0	525	0	525	0	525	1.0016	525	0	0
0	525	0	525	0	525	0	525	1.0116	525	0	0
0	525	0	525	0	525	0	525	1.0216	525	0	0
0	525	0	525	0	525	0	525	1.0316	525	0	0
0	525	0	525	0	525	0	525	1.0416	525	0	0
0	525	0	525	0	525	0	525	1.0517	525	0	0
0	525	0	525	0	525	0	525	1.0617	525	0	0
0	525	0	525	0	525	0	525	1.0717	525	0	0
0	525	0	525	0	525	0	525	1.0817	525	0	0
0	525	0	525	0	525	0	525	1.0917	525	0	0
0	525	0	525	0	525	0	525	1.1017	525	0	0
0	525	0	525	0	525	0	525	1.1118	525	0	0
0	525	0	525	0	525	0	525	1.1218	525	0	0
0	525	0	525	0	525	0	525	1.1318	525	0	0
0	525	0	525	0	525	0	525	1.1418	525	0	0
0	525	0	525	0	525	0	525	1.1518	525	0	0
0	525	0	525	0	525	0	525	1.1618	525	0	0
0	525	0	525	0	525	0	525	1.1719	525	0	0
0	525	0	525	0	525	0	525	1.1819	525	0	0
0	525	0	525	0	525	0	525	1.1919	525	0	0
0	525	0	525	0	525	0	525	1.2019	525	0	0
0	525	0	525	0	525	0	525	1.2119	525	0	0
0	525	0	525	0	525	0	525	1.2219	525	0	0
0	525	0	525	0	525	0	525	1.2319	525	0	0
0	525	0	525	0	525	0	525	1.242	525	0	0
0	525	0	525	0	525	0	525	1.252	525	0	0
0	525	0	525	0	525	0	525	1.262	525	0	0
0	525	0	525	0	525	0	525	1.272	525	0	0
0	525	0	525	0	525	0	525	1.282	525	0	0
0	525	0	525	0	525	0	525	1.292	525	0	0
0	525	0	525	0	525	0	525	1.3021	525	0	0
0	525	0	525	0	525	0	525	1.3121	525	0	0
0	525	0	525	0	525	0	525	1.3221	525	0	0
0	525	0	525	0	525	0	525	1.3321	525	0	0
0	525	0	525	0	525	0	525	1.3421	525	0	0
0	525	0	525	0	525	0	525	1.3521	525	0	0
0	525	0	525	0	525	0	525	1.3622	525	0	0
0	525	0	525	0	525	0	525	1.3722	525	0	0
0	525	0	525	0	525	0	525	1.3822	525	0	0
0	525	0	525	0	525	0	525	1.3922	525	0	0
0	525	0	525	0	525	0	525	1.4022	525	0	0
0	525	0	525	0	525	0	525	1.4122	525	0	0
0	525	0	525	0	525	0	525	1.4223	525	0	0
0	525	0	525	0	525	0	525	1.4323	525	0	0
0	525	0	525	0	525	0	525	1.4423	525	0	0
0	525	0	525	0	525	0	525	1.4523	525	0	0
0	525	0	525	0	525	0	525	1.4623	525	0	0
0	525	0	525	0	525	0	525	1.4723	525	0	0
0	525	0	525	0	525	0	525	1.4823	525	0	0
0	525	0	525	0	525	0	525	1.4924	525	0	0
0	525	0	525	0	525	0	525	1.5024	525	0	0
0	525	0	525	0	525	0	525	1.5124	525	0	0
0	525	0	525	0	525	0	525	1.5224	525	0	0
0	525	0	525	0	525	0	525	1.5324	525	0	0
0	525	0	525	0	525	0	525	1.5424	525	0	0
0	525	0	525	0	525	0	525	1.5525	525	0	0
0	525	0	525	0	525	0	525	1.5625	525	0	0
0	525	0	525	0	525	0	525	1.5725	525	0	0
0	525	0	525	0	525	0	525	1.5825	525	0	0
0	525	0	525	0	525	0	525	1.5925	525	0	0
0	525	0	525	0	525	0	525	1.6025	525	0	0
0	525	0	525	0	525	0	525	1.6126	525	0	0
0	525	0	525	0	525	0	525	1.6226	525	0	0
0	525	0	525	0	525	0	525	1.6326	525	0	0
0	525	0	525	0	525	0	525	1.6426	525	0	0
0	525	0	525	0	525	0	525	1.6526	525	0	0
0	525	0	525	0	525	0	525	1.6626	525	0	0
0	525	0	525	0	525	0	525	1.6726	525	0	0
0	525	0	525	0	525	0	525	1.6827	525	0	0
0	525	0	525	0	525	0	525	1.6927	525	0	0
0	525	0	525	0	525	0	525	1.7027	525	0	0
0	525	0	525	0	525	0	525	1.7127	525	0	0
0	525	0	525	0	525	0	525	1.7227	525	0	0
0	525	0	525	0	525	0	525	1.7327	525	0	0
0	525	0	525	0	525	0	525	1.7428	525	0	0
0	525	0	525	0	525	0	525	1.7528	525	0	0
0	525	0	525	0	525	0	525	1.7628	525	0	0
0	525	0	525	0	525	0	525	1.7728	525	0	0
0	525	0	525	0	525	0	525	1.7828	525	0	0
0	525	0	525	0	525	0	525	1.7928	525	0	0
0	525	0	525	0	525	0	525	1.8029	525	0	0
0	525	0	525	0	525	0	525	1.8129	525	0	0
0	525	0	525	0	525	0	525	1.8229	525	0	0
0	525	0	525	0	525	0	525	1.8329	525	0	0
0	525	0	525	0	525	0	525	1.8429	525	0	0
0	525	0	525	0	525	0	525	1.8529	525	0	0
0	525	0	525	0	525	0	525	1.8629	525	0	0
0	525	0	525	0	525	0	525	1.873	525	0	0
0	525	0	525	0	525	0	525	1.883	525	0	0
0	525	0	525	0	525	0	525	1.893	525	0	0
0	525	0	525	0	525	0	525	1.903	525	0	0
0	525	0	525	0	525	0	525	1.913	525	0	0
0	525	0	525	0	525	0	525	1.923	525	0	0
0	525	0	525	0	525	0	525	1.9331	525	0	0
0	525	0	525	0	525	0	525	1.9431	525	0	0
0	525	0	525	0	525	0	525	1.9531	525	0	0
0	525	0	525	0	525	0	525	1.9631	525	0	0
0	525	0	525	0	525	0	525	1.9731	525	0	0
0	525	0	525	0	525	0	525	1.9831	525	0	0
0	525	0	525	0	525	0	525	1.9932	525	0	0
0	525	0	525	0	525	0	525	2.0032	525	0	0
0	525	0	525	0	525	0	525	2.0132	525	0	0
0	525	0	525	0	525	0	525	2.0232	525	0	0
0	525	0	525	0	525	0	525	2.0332	525	0	0
0	525	0	525	0	525	0	525	2.0432	525	0	0
0	525	0	525	0	525	0	525	2.0532	525	0	0
0	525	0	525	0	525	0	525	2.0633	525	0	0
0	525	0	525	0	525	0	525	2.0733	525	0	0
0	525	0	525	0	525	0	525	2.0833	525	0	0
0	525	0	525	0	525	0	525	2.0933	525	0	0
0	525	0	525	0	525	0	525	2.1033	525	0	0
0	525	0	525	0	525	0	525	2.1133	525	0	0
0	525	0	525	0	525	0	525	2.1234	525	0	0
0	525	0	525	0	525	0	525	2.1334	525	0	0
0	525	0	525	0	525	0	525	2.1434	525	0	0
0	525	0	525	0	525	0	525	2.1534	525	0	0
0	525	0	525	0	525	0	525	2.1634	525	0	0
0	525	0	525	0	525	0	525	2.1734	525	0	0
0	525	0	525	0	525	0	525	2.1835	525	0	0
0	525	0	525	0	525	0	525	2.1935	525	0	0
0	525	0	525	0	525	0	525	2.2035	525	0	0
0	525	0	525	0	525	0	525	2.2135	525	0	0
0	525	0	525	0	525	0	525	2.2235	525	0	0
0	525	0	525	0	525	0	525	2.2335	525	0	0
0	525	0	525	0	525	0	525	2.2435	525	0	0
0	525	0	525	0	525	0	525	2.2536	525	0	0
0	525	0	525	0	525	0	525	2.2636	525	0	0
0	525	0	525	0	525	0	525	2.2736	525	0	0
0	525	0	525	0	525	0	525	2.2836	525	0	0
0	525	0	525	0	525	0	525	2.2936	525	0	0
0	525	0	525	0	525	0	525	2.3036	525	0	0
0	525	0	525	0	525	0	525	2.3137	525	0	0
0	525	0	525	0	525	0	525	2.3237	525	0	0
0	525	0	525	0	525	0	525	2.3337	525	0	0
0	525	0	525	0	525	0	525	2.3437	525	0	0
0	525	0	525	0	525	0	525	2.3537	525	0	0
0	525	0	525	0	525	0	525	2.3637	525	0	0
0	525	0	525	0	525	0	525	2.3738	525	0	0
0	525	0	525	0	525	0	525	2.3838	525	0	0
0	525	0	525	0	525	0	525	2.3938	525	0	0
0	525	0	525	0	525	0	525	2.4038	525	0	0
0	525	0	525	0	525	0	525	2.4138	525	0	0
0	525	0	525	0	525	0	525	2.4238	525	0	0
0	525	0	525	0	525	0	525	2.4339	525	0	0
0	525	0	525	0	525	0	525	2.4439	525	0	0
0	525	0	525	0	525	0	525	2.4539	525	0	0
0	525	0	525	0	525	0	525	2.4639	525	0	0
0	525	0	525	0	525	0	525	2.4739	525	0	0
0	525	0	525	0	525	0	525	2.4839	525	0	0
0	525	0	525	0	525	0	525	2.4939	525	0	0
0	525	0	525	0	525	0	525	2.504	525	0	0
0	525	0	525	0	525	0	525	2.514	525	0	0
0	525	0	525	0	525	0	525	2.524	525	0	0
0	525	0	525	0	525	0	525	2.534	525	0	0
0	525	0	525	0	525	0	525	2.544	525	0	0
0	525	0	525	0	525	0	525	2.554	525	0	0
0	525	0	525	0	525	0	525	2.5641	525	0	0
0	525	0	525	0	525	0	525	2.5741	525	0	0
0	525	0	525	0	525	0	525	2.5841	525	0	0
0	525	0	525	0	525	0	525	2.5941	525	0	0
0	525	0	525	0	525	0	525	2.6041	525	0	0
0	525	0	525	0	525	0	525	2.6141	525	0	0
0	525	0	525	0	525	0	525	2.6242	525	0	0
0	525	0	525	0	525	0	525	2.6342	525	0	0
0	525	0	525	0	525	0	525	2.6442	525	0	0
0	525	0	525	0	525	0	525	2.6542	525	0	0
0	525	0	525	0	525	0	525	2.6642	525	0	0
0	525	0	525	0	525	0	525	2.6742	525	0	0
0	525	0	525	0	525	0	525	2.6842	525	0	0
0	525	0	525	0	525	0	525	2.6943	525	0	0
0	525	0	525	0	525	0	525	2.7043	525	0	0
0	525	0	525	0	525	0	525	2.7143	525	0	0
0	525	0	525	0	525	0	525	2.7243	525	0	0
0	525	0	525	0	525	0	525	2.7343	525	0	0
0	525	0	525	0	525	0	525	2.7443	525	0	0
0	525	0	525	0	525	0	525	2.7544	525	0	0
0	525	0	525	0	525	0	525	2.7644	525	0	0
0	525	0	525	0	525	0	525	2.7744	525	0	0
0	525	0	525	0	525	0	525	2.7844	525	0	0
0	525	0	525	0	525	0	525	2.7944	525	0	0
0	525	0	525	0	525	0	525	2.8044	525	0	0
0	525	0	525	0	525	0	525	2.8145	525	0	0
0	525	0	525	0	525	0	525	2.8245	525	0	0
0	525	0	525	0	525	0	525	2.8345	525	0	0
0	525	0	525	0	525	0	525	2.8445	525	0	0
0	525	0	525	0	525	0	525	2.8545	525	0	0
0	525	0	525	0	525	0	525	2.8645	525	0	0
0	525	0	525	0	525	0	525	2.8745	525	0	0
0	525	0	525	0	525	0	525	2.8846	525	0	0
0	525	0	525	0	525	0	525	2.8946	525	0	0
0	525	0	525	0	525	0	525	2.9046	525	0	0
0	525	0	525	0	525	0	525	2.9146	525	0	0
0	525	0	525	0	525	0	525	2.9246	525	0	0
0	525	0	525	0	525	0	525	2.9346	525	0	0
0	525	0	525	0	525	0	525	2.9447	525	0	0
0	525	0	525	0	525	0	525	2.9547	525	0	0
0	525	0	525	0	525	0	525	2.9647	525	0	0
0	525	0	525	0	525	0	525	2.9747	525	0	0
0	525	0	525	0	525	0	525	2.9847	525	0	0
0	525	0	525	0	525	0	525	2.9947	525	0	0
0	525	0	525	0	525	0	525	3.0048	525	0	0
0	525	0	525	0	525	0	525	3.0148	525	0	0
0	525	0	525	0	525	0	525	3.0248	525	0	0
0	525	0	525	0	525	0	525	3.0348	525	0	0
0	525	0	525	0	525	0	525	3.0448	525	0	0
0	525	0	525	0	525	0	525	3.0548	525	0	0
0	525	0	525	0	525	0	525	3.0648	525	0	0
0	525	0	525	0	525	0	525	3.0749	525	0	0
0	525	0	525	0	525	0	525	3.0849	525	0	0
0	525	0	525	0	525	0	525	3.0949	525	0	0
0	525	0	525	0	525	0	525	3.1049	525	0	0
0	525	0	525	0	525	0	525	3.1149	525	0	0
0	525	0	525	0	525	0	525	3.1249	525	0	0
0	525	0	525	0	525	0	525	3.135	525	0	0
0	525	0	525	0	525	0	525	3.145	525	0	0
0	525	0	525	0	525	0	525	3.155	525	0	0
0	525	0	525	0	525	0	525	3.165	525	0	0
0	525	0	525	0	525	0	525	3.175	525	0	0
0	525	0	525	0	525	0	525	3.185	525	0	0
0	525	0	525	0	525	0	525	3.1951	525	0	0
0	525	0	525	0	525	0	525	3.2051	525	0	0
0	525	0	525	0	525	0	525	3.2151	525	0	0
0	525	0	525	0	525	0	525	3.2251	525	0	0
0	525	0	525	0	525	0	525	3.2351	525	0	0
0	525	0	525	0	525	0	525	3.2451	525	0	0
0	525	0	525	0	525	0	525	3.2551	525	0	0
0	525	0	525	0	525	0	525	3.2652	525	0	0
0	525	0	525	0	525	0	525	3.2752	525	0	0
0	525	0	525	0	525	0	525	3.2852	525	0	0
0	525	0	525	0	525	0	525	3.2952	525	0	0
0	525	0	525	0	525	0	525	3.3052	525	0	0
0	525	0	525	0	525	0	525	3.3152	525	0	0
0	525	0	525	0	525	0	525	3.3253	525	0	0
0	525	0	525	0	525	0	525	3.3353	525	0	0
0	525	0	525	0	525	0	525	3.3453	525	0	0
0	525	0	525	0	525	0	525	3.3553	525	0	0
0	525	0	525	0	525	0	525	3.3653	525	0	0
0	525	0	525	0	525	0	525	3.3753	525	0	0
0	525	0	525	0	525	0	525	3.3854	525	0	0
0	525	0	525	0	525	0	525	3.3954	525	0	0
0	525	0	525	0	525	0	525	3.4054	525	0	0
0	525	0	525	0	525	0	525	3.4154	525	0	0
0	525	0	525	0	525	0	525	3.4254	525	0	0
0	525	0	525	0	525	0	525	3.4354	525	0	0
0	525	0	525	0	525	0	525	3.4455	525	0	0
0	525	0	525	0	525	0	525	3.4555	525	0	0
0	525	0	525	0	525	0	525	3.4655	525	0	0
0	525	0	525	0	525	0	525	3.4755	525	0	0
0	525	0	525	0	525	0	525	3.4855	525	0	0
0	525	0	525	0	525	0	525	3.4955	525	0	0
0	525	0	525	0	525	0	525	3.5055	525	0	0
0	525	0	525	0	525	0	525	3.5156	525	0	0
0	525	0	525	0	525	0	525	3.5256	525	0	0
0	525	0	525	0	525	0	525	3.5356	525	0	0
0	525	0	525	0	525	0	525	3.5456	525	0	0
0	525	0	525	0	525	0	525	3.5556	525	0	0
0	525	0	525	0	525	0	525	3.5656	525	0	0
0	525	0	525	0	525	0	525	3.5757	525	0	0
0	525	0	525	0	525	0	525	3.5857	525	0	0
0	525	0	525	0	525	0	525	3.5957	525	0	0
0	525	0	525	0	525	0	525	3.6057	525	0	0
0	525	0	525	0	525	0	525	3.6157	525	0	0
0	525	0	525	0	525	0	525	3.6257	525	0	0
0	525	0	525	0	525	0	525	3.6358	525	0	0
0	525	0	525	0	525	0	525	3.6458	525	0	0
0	525	0	525	0	525	0	525	3.6558	525	0	0
0	525	0	525	0	525	0	525	3.6658	525	0	0
0	525	0	525	0	525	0	525	3.6758	525	0	0
0	525	0	525	0	525	0	525	3.6858	525	0	0
0	525	0	525	0	525	0	525	3.6958	525	0	0
0	525	0	525	0	525	0	525	3.7059	525	0	0
0	525	0	525	0	525	0	525	3.7159	525	0	0
0	525	0	525	0	525	0	525	3.7259	525	0	0
0	525	0	525	0	525	0	525	3.7359	525	0	0
0	525	0	525	0	525	0	525	3.7459	525	0	0
0	525	0	525	0	525	0	525	3.7559	525	0	0
0	525	0	525	0	525	0	525	3.766	525	0	0
0	525	0	525	0	525	0	525	3.776	525	0	0
0	525	0	525	0	525	0	525	3.786	525	0	0
0	525	0	525	0	525	0	525	3.796	525	0	0
0	525	0	525	0	525	0	525	3.806	525	0	0
0	525	0	525	0	525	0	525	3.816	525	0	0
0	525	0	525	0	525	0	525	3.8261	525	0	0
0	525	0	525	0	525	0	525	3.8361	525	0	0
0	525	0	525	0	525	0	525	3.8461	525	0	0
0	525	0	525	0	525	0	525	3.8561	525	0	0
0	525	0	525	0	525	0	525	3.8661	525	0	0
0	525	0	525	0	525	0	525	3.8761	525	0	0
0	525	0	525	0	525	0	525	3.8861	525	0	0
0	525	0	525	0	525	0	525	3.8962	525	0	0
0	525	0	525	0	525	0	525	3.9062	525	0	0
0	525	0	525	0	525	0	525	3.9162	525	0	0
0	525	0	525	0	525	0	525	3.9262	525	0	0
0	525	0	525	0	525	0	525	3.9362	525	0	0
0	525	0	525	0	525	0	525	3.9462	525	0	0
0	525	0	525	0	525	0	525	3.9563	525	0	0
0	525	0	525	0	525	0	525	3.9663	525	0	0
0	525	0	525	0	525	0	525	3.9763	525	0	0
0	525	0	525	0	525	0	525	3.9863	525	0	0
0	525	0	525	0	525	0	525	3.9963	525	0	0
0	525	0	525	0	525	0	525	4.0063	525	0	0
0	525	0	525	0	525	0	525	4.0164	525	0	0
0	525	0	525	0	525	0	525	4.0264	525	0	0
0	525	0	525	0	525	0	525	4.0364	525	0	0
0	525	0	525	0	525	0	525	4.0464	525	0	0
0	525	0	525	0	525	0	525	4.0564	525	0	0
0	525	0	525	0	525	0	525	4.0664	525	0	0
0	525	0	525	0	525	0	525	4.0764	525	0	0
0	525	0	525	0	525	0	525	4.0865	525	0	0
0	525	0	525	0	525	0	525	4.0965	525	0	0
0	525	0	525	0	525	0	525	4.1065	525	0	0
0	525	0	525	0	525	0	525	4.1165	525	0	0
0	525	0	525	0	525	0	525	4.1265	525	0	0
0	525	0	525	0	525	0	525	4.1365	525	0	0
0	525	0	525	0	525	0	525	4.1466	525	0	0
0	525	0	525	0	525	0	525	4.1566	525	0	0
0	525	0	525	0	525	0	525	4.1666	525	0	0
0	525	0	525	0	525	0	525	4.1766	525	0	0
0	525	0	525	0	525	0	525	4.1866	525	0	0
0	525	0	525	0	525	0	525	4.1966	525	0	0
0	525	0	525	0	525	0	525	4.2067	525	0	0
0	525	0	525	0	525	0	525	4.2167	525	0	0
0	525	0	525	0	525	0	525	4.2267	525	0	0
0	525	0	525	0	525	0	525	4.2367	525	0	0
0	525	0	525	0	525	0	525	4.2467	525	0	0
0	525	0	525	0	525	0	525	4.2567	525	0	0
0	525	0	525	0	525	0	525	4.2668	525	0	0
0	525	0	525	0	525	0	525	4.2768	525	0	0
0	525	0	525	0	525	0	525	4.2868	525	0	0
0	525	0	525	0	525	0	525	4.2968	525	0	0
0	525	0	525	0	525	0	525	4.3068	525	0	0
0	525	0	525	0	525	0	525	4.3168	525	0	0
0	525	0	525	0	525	0	525	4.3268	525	0	0
0	525	0	525	0	525	0	525	4.3369	525	0	0
0	525	0	525	0	525	0	525	4.3469	525	0	0
0	525	0	525	0	525	0	525	4.3569	525	0	0
0	525	0	525	0	525	0	525	4.3669	525	0	0
0	525	0	525	0	525	0	525	4.3769	525	0	0
0	525	0	525	0	525	0	525	4.3869	525	0	0
0	525	0	525	0	525	0	525	4.397	525	0	0
0	525	0	525	0	525	0	525	4.407	525	0	0
0	525	0	525	0	525	0	525	4.417	525	0	0
0	525	0	525	0	525	0	525	4.427	525	0	0
0	525	0	525	0	525	0	525	4.437	525	0	0
0	525	0	525	0	525	0	525	4.447	525	0	0
0	525	0	525	0	525	0	525	4.4571	525	0	0
0	525	0	525	0	525	0	525	4.4671	525	0	0
0	525	0	525	0	525	0	525	4.4771	525	0	0
0	525	0	525	0	525	0	525	4.4871	525	0	0
0	525	0	525	0	525	0	525	4.4971	525	0	0
0	525	0	525	0	525	0	525	4.5071	525	0	0
0	525	0	525	0	525	0	525	4.5171	525	0	0
0	525	0	525	0	525	0	525	4.5272	525	0	0
0	525	0	525	0	525	0	525	4.5372	525	0	0
0	525	0	525	0	525	0	525	4.5472	525	0	0
0	525	0	525	0	525	0	525	4.5572	525	0	0
0	525	0	525	0	525	0	525	4.5672	525	0	0
0	525	0	525	0	525	0	525	4.5772	525	0	0
0	525	0	525	0	525	0	525	4.5873	525	0	0
0	525	0	525	0	525	0	525	4.5973	525	0	0
0	525	0	525	0	525	0	525	4.6073	525	0	0
0	525	0	525	0	525	0	525	4.6173	525	0	0
0	525	0	525	0	525	0	525	4.6273	525	0	0
0	525	0	525	0	525	0	525	4.6373	525	0	0
0	525	0	525	0	525	0	525	4.6474	525	0	0
0	525	0	525	0	525	0	525	4.6574	525	0	0
0	525	0	525	0	525	0	525	4.6674	525	0	0
0	525	0	525	0	525	0	525	4.6774	525	0	0
0	525	0	525	0	525	0	525	4.6874	525	0	0
0	525	0	525	0	525	0	525	4.6974	525	0	0
0	525	0	525	0	525	0	525	4.7074	525	0	0
0	525	0	525	0	525	0	525	4.7175	525	0	0
0	525	0	525	0	525	0	525	4.7275	525	0	0
0	525	0	525	0	525	0	525	4.7375	525	0	0
0	525	0	525	0	525	0	525	4.7475	525	0	0
0	525	0	525	0	525	0	525	4.7575	525	0	0
0	525	0	525	0	525	0	525	4.7675	525	0	0
0	525	0	525	0	525	0	525	4.7776	525	0	0
0	525	0	525	0	525	0	525	4.7876	525	0	0
0	525	0	525	0	525	0	525	4.7976	525	0	0
0	525	0	525	0	525	0	525	4.8076	525	0	0
0	525	0	525	0	525	0	525	4.8176	525	0	0
0	525	0	525	0	525	0	525	4.8276	525	0	0
0	525	0	525	0	525	0	525	4.8377	525	0	0
0	525	0	525	0	525	0	525	4.8477	525	0	0
0	525	0	525	0	525	0	525	4.8577	525	0	0
0	525	0	525	0	525	0	525	4.8677	525	0	0
0	525	0	525	0	525	0	525	4.8777	525	0	0
0	525	0	525	0	525	0	525	4.8877	525	0	0
0	525	0	525	0	525	0	525	4.8977	525	0	0
0	525	0	525	0	525	0	525	4.9078	525	0	0
0	525	0	525	0	525	0	525	4.9178	525	0	0
0	525	0	525	0	525	0	525	4.9278	525	0	0
0	525	0	525	0	525	0	525	4.9378	525	0	0
0	525	0	525	0	525	0	525	4.9478	525	0	0
0	525	0	525	0	525	0	525	4.9578	525	0	0
0	525	0	525	0	525	0	525	4.9679	525	0	0
0	525	0	525	0	525	0	525	4.9779	525	0	0
0	525	0	525	0	525	0	525	4.9879	525	0	0
0	525	0	525	0	525	0	525	4.9979	525	0	0
0	525	0	525	0	525	0	525	5.0079	525	0	0
0	525	0	525	0	525	0	525	5.0179	525	0	0
0	525	0	525	0	525	0	525	5.028	525	0	0
0	525	0	525	0	525	0	525	5.038	525	0	0
0	525	0	525	0	525	0	525	5.048	525	0	0
0	525	0	525	0	525	0	525	5.058	525	0	0
0	525	0	525	0	525	0	525	5.068	525	0	0
0	525	0	525	0	525	0	525	5.078	525	0	0
0	525	0	525	0	525	0	525	5.088	525	0	0
0	525	0	525	0	525	0	525	5.0981	525	0	0
0	525	0	525	0	525	0	525	5.1081	525	0	0
0	525	0	525	0	525	0	525	5.1181	525	0	0
0	525	0	525	0	525	0	525	5.1281	525	0	0
0	525	0	525	0	525	0	525	5.1381	525	0	0
0	525	0	525	0	525	0	525	5.1481	525	0	0
0	525	0	525	0	525	0	525	5.1582	525	0	0
0	525	0	525	0	525	0	525	5.1682	525	0	0
0	525	0	525	0	525	0	525	5.1782	525	0	0
0	525	0	525	0	525	0	525	5.1882	525	0	0
0	525	0	525	0	525	0	525	5.1982	525	0	0
0	525	0	525	0	525	0	525	5.2082	525	0	0
0	525	0	525	0	525	0	525	5.2183	525	0	0
0	525	0	525	0	525	0	525	5.2283	525	0	0
0	525	0	525	0	525	0	525	5.2383	525	0	0
0	525	0	525	0	525	0	525	5.2483	525	0	0
0	525	0	525	0	525	0	525	5.2583	525	0	0
0	525	0	525	0	525	0	525	5.2683	525	0	0
0	525	0	525	0	525	0	525	5.2784	525	0	0
0	525	0	525	0	525	0	525	5.2884	525	0	0
0	525	0	525	0	525	0	525	5.2984	525	0	0
0	525	0	525	0	525	0	525	5.3084	525	0	0
0	525	0	525	0	525	0	525	5.3184	525	0	0
0	525	0	525	0	525	0	525	5.3284	525	0	0
0	525	0	525	0	525	0	525	5.3384	525	0	0
0	525	0	525	0	525	0	525	5.3485	525	0	0
0	525	0	525	0	525	0	525	5.3585	525	0	0
0	525	0	525	0	525	0	525	5.3685	525	0	0
0	525	0	525	0	525	0	525	5.3785	525	0	0
0	525	0	525	0	525	0	525	5.3885	525	0	0
0	525	0	525	0	525	0	525	5.3985	525	0	0
0	525	0	525	0	525	0	525	5.4086	525	0	0
0	525	0	525	0	525	0	525	5.4186	525	0	0
0	525	0	525	0	525	0	525	5.4286	525	0	0
0	525	0	525	0	525	0	525	5.4386	525	0	0
0	525	0	525	0	525	0	525	5.4486	525	0	0
0	525	0	525	0	525	0	525	5.4586	525	0	0
0	525	0	525	0	525	0	525	5.4687	525	0	0
0	525	0	525	0	525	0	525	5.4787	525	0	0
0	525	0	525	0	525	0	525	5.4887	525	0	0
0	525	0	525	0	525	0	525	5.4987	525	0	0
0	525	0	525	0	525	0	525	5.5087	525	0	0
0	525	0	525	0	525	0	525	5.5187	525	0	0
0	525	0	525	0	525	0	525	5.5287	525	0	0
0	525	0	525	0	525	0	525	5.5388	525	0	0
0	525	0	525	0	525	0	525	5.5488	525	0	0
0	525	0	525	0	525	0	525	5.5588	525	0	0
0	525	0	525	0	525	0	525	5.5688	525	0	0
0	525	0	525	0	525	0	525	5.5788	525	0	0
0	525	0	525	0	525	0	525	5.5888	525	0	0
0	525	0	525	0	525	0	525	5.5989	525	0	0
0	525	0	525	0	525	0	525	5.6089	525	0	0
0	525	0	525	0	525	0	525	5.6189	525	0	0
0	525	0	525	0	525	0	525	5.6289	525	0	0
0	525	0	525	0	525	0	525	5.6389	525	0	0
0	525	0	525	0	525	0	525	5.6489	525	0	0
0	525	0	525	0	525	0	525	5.659	525	0	0
0	525	0	525	0	525	0	525	5.669	525	0	0
0	525	0	525	0	525	0	525	5.679	525	0	0
0	525	0	525	0	525	0	525	5.689	525	0	0
0	525	0	525	0	525	0	525	5.699	525	0	0
0	525	0	525	0	525	0	525	5.709	525	0	0
0	525	0	525	0	525	0	525	5.719	525	0	0
0	525	0	525	0	525	0	525	5.7291	525	0	0
0	525	0	525	0	525	0	525	5.7391	525	0	0
0	525	0	525	0	525	0	525	5.7491	525	0	0
0	525	0	525	0	525	0	525	5.7591	525	0	0
0	525	0	525	0	525	0	525	5.7691	525	0	0
0	525	0	525	0	525	0	525	5.7791	525	0	0
0	525	0	525	0	525	0	525	5.7892	525	0	0
0	525	0	525	0	525	0	525	5.7992	525	0	0
0	525	0	525	0	525	0	525	5.8092	525	0	0
0	525	0	525	0	525	0	525	5.8192	525	0	0
0	525	0	525	0	525	0	525	5.8292	525	0	0
0	525	0	525	0	525	0	525	5.8392	525	0	0
0	525	0	525	0	525	0	525	5.8493	525	0	0
0	525	0	525	0	525	0	525	5.8593	525	0	0
0	525	0	525	0	525	0	525	5.8693	525	0	0
0	525	0	525	0	525	0	525	5.8793	525	0	0
0	525	0	525	0	525	0	525	5.8893	525	0	0
0	525	0	525	0	525	0	525	5.8993	525	0	0
0	525	0	525	0	525	0	525	5.9093	525	0	0
0	525	0	525	0	525	0	525	5.9194	525	0	0
0	525	0	525	0	525	0	525	5.9294	525	0	0
0	525	0	525	0	525	0	525	5.9394	525	0	0
0	525	0	525	0	525	0	525	5.9494	525	0	0
0	525	0	525	0	525	0	525	5.9594	525	0	0
0	525	0	525	0	525	0	525	5.9694	525	0	0
0	525	0	525	0	525	0	525	5.9795	525	0	0
0	525	0	525	0	525	0	525	5.9895	525	0	0
0	525	0	525	0	525	0	525	5.9995	525	0	0
0	525	0	525	0	525	0	525	6.0095	525	0	0
0	525	0	525	0	525	0	525	6.0195	525	0	0
0	525	0	525	0	525	0	525	6.0295	525	0	0
0	525	0	525	0	525	0	525	6.0396	525	0	0
0	525	0	525	0	525	0	525	6.0496	525	0	0
0	525	0	525	0	525	0	525	6.0596	525	0	0
0	525	0	525	0	525	0	525	6.0696	525	0	0
0	525	0	525	0	525	0	525	6.0796	525	0	0
0	525	0	525	0	525	0	525	6.0896	525	0	0
0	525	0	525	0	525	0	525	6.0997	525	0	0
0	525	0	525	0	525	0	525	6.1097	525	0	0
0	525	0	525	0	525	0	525	6.1197	525	0	0
0	525	0	525	0	525	0	525	6.1297	525	0	0
0	525	0	525	0	525	0	525	6.1397	525	0	0
0	525	0	525	0	525	0	525	6.1497	525	0	0
0	525	0	525	0	525	0	525	6.1597	525	0	0
0	525	0	525	0	525	0	525	6.1698	525	0	0
0	525	0	525	0	525	0	525	6.1798	525	0	0
0	525	0	525	0	525	0	525	6.1898	525	0	0
0	525	0	525	0	525	0	525	6.1998	525	0	0
0	525	0	525	0	525	0	525	6.2098	525	0	0
0	525	0	525	0	525	0	525	6.2198	525	0	0
0	525	0	525	0	525	0	525	6.2299	525	0	0
0	525	0	525	0	525	0	525	6.2399	525	0	0
0	525	0	525	0	525	0	525	6.2499	525	0	0
0	525	0	525	0	525	0	525	6.2599	525	0	0
0	525	0	525	0	525	0	525	6.2699	525	0	0
0	525	0	525	0	525	0	525	6.2799	525	0	0
0	525	0	525	0	525	0	525	6.29	525	0	0
0	525	0	525	0	525	0	525	6.3	525	0	0
0	525	0	525	0	525	0	525	6.31	525	0	0
0	525	0	525	0	525	0	525	6.32	525	0	0
0	525	0	525	0	525	0	525	6.33	525	0	0
0	525	0	525	0	525	0	525	6.34	525	0	0
0	525	0	525	0	525	0	525	6.35	525	0	0
0	525	0	525	0	525	0	525	6.3601	525	0	0
0	525	0	525	0	525	0	525	6.3701	525	0	0
0	525	0	525	0	525	0	525	6.3801	525	0	0
0	525	0	525	0	525	0	525	6.3901	525	0	0
0	525	0	525	0	525	0	525	6.4001	525	0	0
0	525	0	525	0	525	0	525	6.4101	525	0	0
0	525	0	525	0	525	0	525	6.4202	525	0	0
0	525	0	525	0	525	0	525	6.4302	525	0	0
0	525	0	525	0	525	0	525	6.4402	525	0	0
0	525	0	525	0	525	0	525	6.4502	525	0	0
0	525	0	525	0	525	0	525	6.4602	525	0	0
0	525	0	525	0	525	0	525	6.4702	525	0	0
0	525	0	525	0	525	0	525	6.4803	525	0	0
0	525	0	525	0	525	0	525	6.4903	525	0	0
0	525	0	525	0	525	0	525	6.5003	525	0	0
0	525	0	525	0	525	0	525	6.5103	525	0	0
0	525	0	525	0	525	0	525	6.5203	525	0	0
0	525	0	525	0	525	0	525	6.5303	525	0	0
0	525	0	525	0	525	0	525	6.5403	525	0	0
0	525	0	525	0	525	0	525	6.5504	525	0	0
0	525	0	525	0	525	0	525	6.5604	525	0	0
0	525	0	525	0	525	0	525	6.5704	525	0	0
0	525	0	525	0	525	0	525	6.5804	525	0	0
0	525	0	525	0	525	0	525	6.5904	525	0	0
0	525	0	525	0	525	0	525	6.6004	525	0	0
0	525	0	525	0	525	0	525	6.6105	525	0	0
0	525	0	525	0	525	0	525	6.6205	525	0	0
0	525	0	525	0	525	0	525	6.6305	525	0	0
0	525	0	525	0	525	0	525	6.6405	525	0	0
0	525	0	525	0	525	0	525	6.6505	525	0	0
0	525	0	525	0	525	0	525	6.6605	525	0	0
0	525	0	525	0	525	0	525	6.6706	525	0	0
0	525	0	525	0	525	0	525	6.6806	525	0	0
0	525	0	525	0	525	0	525	6.6906	525	0	0
0	525	0	525	0	525	0	525	6.7006	525	0	0
0	525	0	525	0	525	0	525	6.7106	525	0	0
0	525	0	525	0	525	0	525	6.7206	525	0	0
0	525	0	525	0	525	0	525	6.7306	525	0	0
0	525	0	525	0	525	0	525	6.7407	525	0	0
0	525	0	525	0	525	0	525	6.7507	525	0	0
0	525	0	525	0	525	0	525	6.7607	525	0	0
0	525	0	525	0	525	0	525	6.7707	525	0	0
0	525	0	525	0	525	0	525	6.7807	525	0	0
0	525	0	525	0	525	0	525	6.7907	525	0	0
0	525	0	525	0	525	0	525	6.8008	525	0	0
0	525	0	525	0	525	0	525	6.8108	525	0	0
0	525	0	525	0	525	0	525	6.8208	525	0	0
0	525	0	525	0	525	0	525	6.8308	525	0	0
0	525	0	525	0	525	0	525	6.8408	525	0	0
0	525	0	525	0	525	0	525	6.8508	525	0	0
0	525	0	525	0	525	0	525	6.8609	525	0	0
0	525	0	525	0	525	0	525	6.8709	525	0	0
0	525	0	525	0	525	0	525	6.8809	525	0	0
0	525	0	525	0	525	0	525	6.8909	525	0	0
0	525	0	525	0	525	0	525	6.9009	525	0	0
0	525	0	525	0	525	0	525	6.9109	525	0	0
0	525	0	525	0	525	0	525	6.9209	525	0	0
0	525	0	525	0	525	0	525	6.931	525	0	0
0	525	0	525	0	525	0	525	6.941	525	0	0
0	525	0	525	0	525	0	525	6.951	525	0	0
0	525	0	525	0	525	0	525	6.961	525	0	0
0	525	0	525	0	525	0	525	6.971	525	0	0
0	525	0	525	0	525	0	525	6.981	525	0	0
0	525	0	525	0	525	0	525	6.9911	525	0	0
0	525	0	525	0	525	0	525	7.0011	525	0	0
0	525	0	525	0	525	0	525	7.0111	525	0	0
0	525	0	525	0	525	0	525	7.0211	525	0	0
0	525	0	525	0	525	0	525	7.0311	525	0	0
0	525	0	525	0	525	0	525	7.0411	525	0	0
0	525	0	525	0	525	0	525	7.0512	525	0	0
0	525	0	525	0	525	0	525	7.0612	525	0	0
0	525	0	525	0	525	0	525	7.0712	525	0	0
0	525	0	525	0	525	0	525	7.0812	525	0	0
0	525	0	525	0	525	0	525	7.0912	525	0	0
0	525	0	525	0	525	0	525	7.1012	525	0	0
0	525	0	525	0	525	0	525	7.1113	525	0	0
0	525	0	525	0	525	0	525	7.1213	525	0	0
0	525	0	525	0	525	0	525	7.1313	525	0	0
0	525	0	525	0	525	0	525	7.1413	525	0	0
0	525	0	525	0	525	0	525	7.1513	525	0	0
0	525	0	525	0	525	0	525	7.1613	525	0	0
0	525	0	525	0	525	0	525	7.1713	525	0	0
0	525	0	525	0	525	0	525	7.1814	525	0	0
0	525	0	525	0	525	0	525	7.1914	525	0	0
0	525	0	525	0	525	0	525	7.2014	525	0	0
0	525	0	525	0	525	0	525	7.2114	525	0	0
0	525	0	525	0	525	0	525	7.2214	525	0	0
0	525	0	525	0	525	0	525	7.2314	525	0	0
0	525	0	525	0	525	0	525	7.2415	525	0	0
0	525	0	525	0	525	0	525	7.2515	525	0	0
0	525	0	525	0	525	0	525	7.2615	525	0	0
0	525	0	525	0	525	0	525	7.2715	525	0	0
0	525	0	525	0	525	0	525	7.2815	525	0	0
0	525	0	525	0	525	0	525	7.2915	525	0	0
0	525	0	525	0	525	0	525	7.3016	525	0	0
0	525	0	525	0	525	0	525	7.3116	525	0	0
0	525	0	525	0	525	0	525	7.3216	525	0	0
0	525	0	525	0	525	0	525	7.3316	525	0	0
0	525	0	525	0	525	0	525	7.3416	525	0	0
0	525	0	525	0	525	0	525	7.3516	525	0	0
0	525	0	525	0	525	0	525	7.3616	525	0	0
0	525	0	525	0	525	0	525	7.3717	525	0	0
0	525	0	525	0	525	0	525	7.3817	525	0	0
0	525	0	525	0	525	0	525	7.3917	525	0	0
0	525	0	525	0	525	0	525	7.4017	525	0	0
0	525	0	525	0	525	0	525	7.4117	525	0	0
0	525	0	525	0	525	0	525	7.4217	525	0	0
0	525	0	525	0	525	0	525	7.4318	525	0	0
0	525	0	525	0	525	0	525	7.4418	525	0	0
0	525	0	525	0	525	0	525	7.4518	525	0	0
0	525	0	525	0	525	0	525	7.4618	525	0	0
0	525	0	525	0	525	0	525	7.4718	525	0	0
0	525	0	525	0	525	0	525	7.4818	525	0	0
0	525	0	525	0	525	0	525	7.4919	525	0	0
0	525	0	525	0	525	0	525	7.5019	525	0	0
0	525	0	525	0	525	0	525	7.5119	525	0	0
0	525	0	525	0	525	0	525	7.5219	525	0	0
0	525	0	525	0	525	0	525	7.5319	525	0	0
0	525	0	525	0	525	0	525	7.5419	525	0	0
0	525	0	525	0	525	0	525	7.5519	525	0	0
0	525	0	525	0	525	0	525	7.562	525	0	0
0	525	0	525	0	525	0	525	7.572	525	0	0
0	525	0	525	0	525	0	525	7.582	525	0	0
0	525	0	525	0	525	0	525	7.592	525	0	0
0	525	0	525	0	525	0	525	7.602	525	0	0
0	525	0	525	0	525	0	525	7.612	525	0	0
0	525	0	525	0	525	0	525	7.6221	525	0	0
0	525	0	525	0	525	0	525	7.6321	525	0	0
0	525	0	525	0	525	0	525	7.6421	525	0	0
0	525	0	525	0	525	0	525	7.6521	525	0	0
0	525	0	525	0	525	0	525	7.6621	525	0	0
0	525	0	525	0	525	0	525	7.6721	525	0	0
0	525	0	525	0	525	0	525	7.6822	525	0	0
0	525	0	525	0	525	0	525	7.6922	525	0	0
0	525	0	525	0	525	0	525	7.7022	525	0	0
0	525	0	525	0	525	0	525	7.7122	525	0	0
0	525	0	525	0	525	0	525	7.7222	525	0	0
0	525	0	525	0	525	0	525	7.7322	525	0	0
0	525	0	525	0	525	0	525	7.7422	525	0	0
0	525	0	525	0	525	0	525	7.7523	525	0	0
0	525	0	525	0	525	0	525	7.7623	525	0	0
0	525	0	525	0	525	0	525	7.7723	525	0	0
0	525	0	525	0	525	0	525	7.7823	525	0	0
0	525	0	525	0	525	0	525	7.7923	525	0	0
0	525	0	525	0	525	0	525	7.8023	525	0	0
0	525	0	525	0	525	0	525	7.8124	525	0	0
0	525	0	525	0	525	0	525	7.8224	525	0	0
0	525	0	525	0	525	0	525	7.8324	525	0	0
0	525	0	525	0	525	0	525	7.8424	525	0	0
0	525	0	525	0	525	0	525	7.8524	525	0	0
0	525	0	525	0	525	0	525	7.8624	525	0	0
0	525	0	525	0	525	0	525	7.8725	525	0	0
0	525	0	525	0	525	0	525	7.8825	525	0	0
0	525	0	525	0	525	0	525	7.8925	525	0	0
0	525	0	525	0	525	0	525	7.9025	525	0	0
0	525	0	525	0	525	0	525	7.9125	525	0	0
0	525	0	525	0	525	0	525	7.9225	525	0	0
0	525	0	525	0	525	0	525	7.9325	525	0	0
0	525	0	525	0	525	0	525	7.9426	525	0	0
0	525	0	525	0	525	0	525	7.9526	525	0	0
0	525	0	525	0	525	0	525	7.9626	525	0	0
0	525	0	525	0	525	0	525	7.9726	525	0	0
0	525	0	525	0	525	0	525	7.9826	525	0	0
0	525	0	525	0	525	0	525	7.9926	525	0	0
0	525	0	525	0	525	0	525	8.0027	525	0	0
0	525	0	525	0	525	0	525	8.0127	525	0	0
0	525	0	525	0	525	0	525	8.0227	525	0	0
0	525	0	525	0	525	0	525	8.0327	525	0	0
0	525	0	525	0	525	0	525	8.0427	525	0	0
0	525	0	525	0	525	0	525	8.0527	525	0	0
0	525	0	525	0	525	0	525	8.0628	525	0	0
0	525	0	525	0	525	0	525	8.0728	525	0	0
0	525	0	525	0	525	0	525	8.0828	525	0	0
0	525	0	525	0	525	0	525	8.0928	525	0	0
0	525	0	525	0	525	0	525	8.1028	525	0	0
0	525	0	525	0	525	0	525	8.1128	525	0	0
0	525	0	525	0	525	0	525	8.1229	525	0	0
0	525	0	525	0	525	0	525	8.1329	525	0	0
0	525	0	525	0	525	0	525	8.1429	525	0	0
0	525	0	525	0	525	0	525	8.1529	525	0	0
0	525	0	525	0	525	0	525	8.1629	525	0	0
0	525	0	525	0	525	0	525	8.1729	525	0	0
0	525	0	525	0	525	0	525	8.1829	525	0	0
0	525	0	525	0	525	0	525	8.193	525	0	0
0	525	0	525	0	525	0	525	8.203	525	0	0
0	525	0	525	0	525	0	525	8.213	525	0	0
0	525	0	525	0	525	0	525	8.223	525	0	0
0	525	0	525	0	525	0	525	8.233	525	0	0
0	525	0	525	0	525	0	525	8.243	525	0	0
0	525	0	525	0	525	0	525	8.2531	525	0	0
0	525	0	525	0	525	0	525	8.2631	525	0	0
0	525	0	525	0	525	0	525	8.2731	525	0	0
0	525	0	525	0	525	0	525	8.2831	525	0	0
0	525	0	525	0	525	0	525	8.2931	525	0	0
0	525	0	525	0	525	0	525	8.3031	525	0	0
0	525	0	525	0	525	0	525	8.3132	525	0	0
0	525	0	525	0	525	0	525	8.3232	525	0	0
0	525	0	525	0	525	0	525	8.3332	525	0	0
0	525	0	525	0	525	0	525	8.3432	525	0	0
0	525	0	525	0	525	0	525	8.3532	525	0	0
0	525	0	525	0	525	0	525	8.3632	525	0	0
0	525	0	525	0	525	0	525	8.3732	525	0	0
0	525	0	525	0	525	0	525	8.3833	525	0	0
0	525	0	525	0	525	0	525	8.3933	525	0	0
0	525	0	525	0	525	0	525	8.4033	525	0	0
0	525	0	525	0	525	0	525	8.4133	525	0	0
0	525	0	525	0	525	0	525	8.4233	525	0	0
0	525	0	525	0	525	0	525	8.4333	525	0	0
0	525	0	525	0	525	0	525	8.4434	525	0	0
0	525	0	525	0	525	0	525	8.4534	525	0	0
0	525	0	525	0	525	0	525	8.4634	525	0	0
0	525	0	525	0	525	0	525	8.4734	525	0	0
0	525	0	525	0	525	0	525	8.4834	525	0	0
0	525	0	525	0	525	0	525	8.4934	525	0	0
0	525	0	525	0	525	0	525	8.5035	525	0	0
0	525	0	525	0	525	0	525	8.5135	525	0	0
0	525	0	525	0	525	0	525	8.5235	525	0	0
0	525	0	525	0	525	0	525	8.5335	525	0	0
0	525	0	525	0	525	0	525	8.5435	525	0	0
0	525	0	525	0	525	0	525	8.5535	525	0	0
0	525	0	525	0	525	0	525	8.5635	525	0	0
0	525	0	525	0	525	0	525	8.5736	525	0	0
0	525	0	525	0	525	0	525	8.5836	525	0	0
0	525	0	525	0	525	0	525	8.5936	525	0	0
0	525	0	525	0	525	0	525	8.6036	525	0	0
0	525	0	525	0	525	0	525	8.6136	525	0	0
0	525	0	525	0	525	0	525	8.6236	525	0	0
0	525	0	525	0	525	0	525	8.6337	525	0	0
0	525	0	525	0	525	0	525	8.6437	525	0	0
0	525	0	525	0	525	0	525	8.6537	525	0	0
0	525	0	525	0	525	0	525	8.6637	525	0	0
0	525	0	525	0	525	0	525	8.6737	525	0	0
0	525	0	525	0	525	0	525	8.6837	525	0	0
0	525	0	525	0	525	0	525	8.6938	525	0	0
0	525	0	525	0	525	0	525	8.7038	525	0	0
0	525	0	525	0	525	0	525	8.7138	525	0	0
0	525	0	525	0	525	0	525	8.7238	525	0	0
0	525	0	525	0	525	0	525	8.7338	525	0	0
0	525	0	525	0	525	0	525	8.7438	525	0	0
0	525	0	525	0	525	0	525	8.7538	525	0	0
0	525	0	525	0	525	0	525	8.7639	525	0	0
0	525	0	525	0	525	0	525	8.7739	525	0	0
0	525	0	525	0	525	0	525	8.7839	525	0	0
0	525	0	525	0	525	0	525	8.7939	525	0	0
0	525	0	525	0	525	0	525	8.8039	525	0	0
0	525	0	525	0	525	0	525	8.8139	525	0	0
0	525	0	525	0	525	0	525	8.824	525	0	0
0	525	0	525	0	525	0	525	8.834	525	0	0
0	525	0	525	0	525	0	525	8.844	525	0	0
0	525	0	525	0	525	0	525	8.854	525	0	0
0	525	0	525	0	525	0	525	8.864	525	0	0
0	525	0	525	0	525	0	525	8.874	525	0	0
0	525	0	525	0	525	0	525	8.8841	525	0	0
0	525	0	525	0	525	0	525	8.8941	525	0	0
0	525	0	525	0	525	0	525	8.9041	525	0	0
0	525	0	525	0	525	0	525	8.9141	525	0	0
0	525	0	525	0	525	0	525	8.9241	525	0	0
0	525	0	525	0	525	0	525	8.9341	525	0	0
0	525	0	525	0	525	0	525	8.9442	525	0	0
0	525	0	525	0	525	0	525	8.9542	525	0	0
0	525	0	525	0	525	0	525	8.9642	525	0	0
0	525	0	525	0	525	0	525	8.9742	525	0	0
0	525	0	525	0	525	0	525	8.9842	525	0	0
0	525	0	525	0	525	0	525	8.9942	525	0	0
0	525	0	525	0	525	0	525	9.0042	525	0	0
0	525	0	525	0	525	0	525	9.0143	525	0	0
0	525	0	525	0	525	0	525	9.0243	525	0	0
0	525	0	525	0	525	0	525	9.0343	525	0	0
0	525	0	525	0	525	0	525	9.0443	525	0	0
0	525	0	525	0	525	0	525	9.0543	525	0	0
0	525	0	525	0	525	0	525	9.0643	525	0	0
0	525	0	525	0	525	0	525	9.0744	525	0	0
0	525	0	525	0	525	0	525	9.0844	525	0	0
0	525	0	525	0	525	0	525	9.0944	525	0	0
0	525	0	525	0	525	0	525	9.1044	525	0	0
0	525	0	525	0	525	0	525	9.1144	525	0	0
0	525	0	525	0	525	0	525	9.1244	525	0	0
0	525	0	525	0	525	0	525	9.1345	525	0	0
0	525	0	525	0	525	0	525	9.1445	525	0	0
0	525	0	525	0	525	0	525	9.1545	525	0	0
0	525	0	525	0	525	0	525	9.1645	525	0	0
0	525	0	525	0	525	0	525	9.1745	525	0	0
0	525	0	525	0	525	0	525	9.1845	525	0	0
0	525	0	525	0	525	0	525	9.1945	525	0	0
0	525	0	525	0	525	0	525	9.2046	525	0	0
0	525	0	525	0	525	0	525	9.2146	525	0	0
0	525	0	525	0	525	0	525	9.2246	525	0	0
0	525	0	525	0	525	0	525	9.2346	525	0	0
0	525	0	525	0	525	0	525	9.2446	525	0	0
0	525	0	525	0	525	0	525	9.2546	525	0	0
0	525	0	525	0	525	0	525	9.2647	525	0	0
0	525	0	525	0	525	0	525	9.2747	525	0	0
0	525	0	525	0	525	0	525	9.2847	525	0	0
0	525	0	525	0	525	0	525	9.2947	525	0	0
0	525	0	525	0	525	0	525	9.3047	525	0	0
0	525	0	525	0	525	0	525	9.3147	525	0	0
0	525	0	525	0	525	0	525	9.3248	525	0	0
0	525	0	525	0	525	0	525	9.3348	525	0	0
0	525	0	525	0	525	0	525	9.3448	525	0	0
0	525	0	525	0	525	0	525	9.3548	525	0	0
0	525	0	525	0	525	0	525	9.3648	525	0	0
0	525	0	525	0	525	0	525	9.3748	525	0	0
0	525	0	525	0	525	0	525	9.3848	525	0	0
0	525	0	525	0	525	0	525	9.3949	525	0	0
0	525	0	525	0	525	0	525	9.4049	525	0	0
0	525	0	525	0	525	0	525	9.4149	525	0	0
0	525	0	525	0	525	0	525	9.4249	525	0	0
0	525	0	525	0	525	0	525	9.4349	525	0	0
0	525	0	525	0	525	0	525	9.4449	525	0	0
0	525	0	525	0	525	0	525	9.455	525	0	0
0	525	0	525	0	525	0	525	9.465	525	0	0
0	525	0	525	0	525	0	525	9.475	525	0	0
0	525	0	525	0	525	0	525	9.485	525	0	0
0	525	0	525	0	525	0	525	9.495	525	0	0
0	525	0	525	0	525	0	525	9.505	525	0	0
0	525	0	525	0	525	0	525	9.5151	525	0	0
0	525	0	525	0	525	0	525	9.5251	525	0	0
0	525	0	525	0	525	0	525	9.5351	525	0	0
0	525	0	525	0	525	0	525	9.5451	525	0	0
0	525	0	525	0	525	0	525	9.5551	525	0	0
0	525	0	525	0	525	0	525	9.5651	525	0	0
0	525	0	525	0	525	0	525	9.5751	525	0	0
0	525	0	525	0	525	0	525	9.5852	525	0	0
0	525	0	525	0	525	0	525	9.5952	525	0	0
0	525	0	525	0	525	0	525	9.6052	525	0	0
0	525	0	525	0	525	0	525	9.6152	525	0	0
0	525	0	525	0	525	0	525	9.6252	525	0	0
0	525	0	525	0	525	0	525	9.6352	525	0	0
0	525	0	525	0	525	0	525	9.6453	525	0	0
0	525	0	525	0	525	0	525	9.6553	525	0	0
0	525	0	525	0	525	0	525	9.6653	525	0	0
0	525	0	525	0	525	0	525	9.6753	525	0	0
0	525	0	525	0	525	0	525	9.6853	525	0	0
0	525	0	525	0	525	0	525	9.6953	525	0	0
0	525	0	525	0	525	0	525	9.7054	525	0	0
0	525	0	525	0	525	0	525	9.7154	525	0	0
0	525	0	525	0	525	0	525	9.7254	525	0	0
0	525	0	525	0	525	0	525	9.7354	525	0	0
0	525	0	525	0	525	0	525	9.7454	525	0	0
0	525	0	525	0	525	0	525	9.7554	525	0	0
0	525	0	525	0	525	0	525	9.7654	525	0	0
0	525	0	525	0	525	0	525	9.7755	525	0	0
0	525	0	525	0	525	0	525	9.7855	525	0	0
0	525	0	525	0	525	0	525	9.7955	525	0	0
0	525	0	525	0	525	0	525	9.8055	525	0	0
0	525	0	525	0	525	0	525	9.8155	525	0	0
0	525	0	525	0	525	0	525	9.8255	525	0	0
0	525	0	525	0	525	0	525	9.8356	525	0	0
0	525	0	525	0	525	0	525	9.8456	525	0	0
0	525	0	525	0	525	0	525	9.8556	525	0	0
0	525	0	525	0	525	0	525	9.8656	525	0	0
0	525	0	525	0	525	0	525	9.8756	525	0	0
0	525	0	525	0	525	0	525	9.8856	525	0	0
0	525	0	525	0	525	0	525	9.8957	525	0	0
0	525	0	525	0	525	0	525	9.9057	525	0	0
0	525	0	525	0	525	0	525	9.9157	525	0	0
0	525	0	525	0	525	0	525	9.9257	525	0	0
0	525	0	525	0	525	0	525	9.9357	525	0	0
0	525	0	525	0	525	0	525	9.9457	525	0	0
0	525	0	525	0	525	0	525	9.9558	525	0	0
0	525	0	525	0	525	0	525	9.9658	525	0	0
0	525	0	525	0	525	0	525	9.9758	525	0	0
0	525	0	525	0	525	0	525	9.9858	525	0	0
0	525	0	525	0	525	0	525	9.9958	525	0	0
0	525	0	525	0	525	0	525	10.0058	525	0	0
0	525	0	525	0	525	0	525	10.0158	525	0	0
0	525	0	525	0	525	0	525	10.0259	525	0	0
0	525	0	525	0	525	0	525	10.0359	525	0	0
0	525	0	525	0	525	0	525	10.0459	525	0	0
0	525	0	525	0	525	0	525	10.0559	525	0	0
0	525	0	525	0	525	0	525	10.0659	525	0	0
0	525	0	525	0	525	0	525	10.0759	525	0	0
0	525	0	525	0	525	0	525	10.086	525	0	0
0	525	0	525	0	525	0	525	10.096	525	0	0
0	525	0	525	0	525	0	525	10.106	525	0	0
0	525	0	525	0	525	0	525	10.116	525	0	0
0	525	0	525	0	525	0	525	10.126	525	0	0
0	525	0	525	0	525	0	525	10.136	525	0	0
0	525	0	525	0	525	0	525	10.1461	525	0	0
0	525	0	525	0	525	0	525	10.1561	525	0	0
0	525	0	525	0	525	0	525	10.1661	525	0	0
0	525	0	525	0	525	0	525	10.1761	525	0	0
0	525	0	525	0	525	0	525	10.1861	525	0	0
0	525	0	525	0	525	0	525	10.1961	525	0	0
0	525	0	525	0	525	0	525	10.2061	525	0	0
0	525	0	525	0	525	0	525	10.2162	525	0	0
0	525	0	525	0	525	0	525	10.2262	525	0	0
0	525	0	525	0	525	0	525	10.2362	525	0	0
0	525	0	525	0	525	0	525	10.2462	525	0	0
0	525	0	525	0	525	0	525	10.2562	525	0	0
0	525	0	525	0	525	0	525	10.2662	525	0	0
0	525	0	525	0	525	0	525	10.2763	525	0	0
0	525	0	525	0	525	0	525	10.2863	525	0	0
0	525	0	525	0	525	0	525	10.2963	525	0	0
0	525	0	525	0	525	0	525	10.3063	525	0	0
0	525	0	525	0	525	0	525	10.3163	525	0	0
0	525	0	525	0	525	0	525	10.3263	525	0	0
0	525	0	525	0	525	0	525	10.3364	525	0	0
0	525	0	525	0	525	0	525	10.3464	525	0	0
0	525	0	525	0	525	0	525	10.3564	525	0	0
0	525	0	525	0	525	0	525	10.3664	525	0	0
0	525	0	525	0	525	0	525	10.3764	525	0	0
0	525	0	525	0	525	0	525	10.3864	525	0	0
0	525	0	525	0	525	0	525	10.3964	525	0	0
0	525	0	525	0	525	0	525	10.4065	525	0	0
0	525	0	525	0	525	0	525	10.4165	525	0	0
0	525	0	525	0	525	0	525	10.4265	525	0	0
0	525	0	525	0	525	0	525	10.4365	525	0	0
0	525	0	525	0	525	0	525	10.4465	525	0	0
0	525	0	525	0	525	0	525	10.4565	525	0	0
0	525	0	525	0	525	0	525	10.4666	525	0	0
0	525	0	525	0	525	0	525	10.4766	525	0	0
0	525	0	525	0	525	0	525	10.4866	525	0	0
0	525	0	525	0	525	0	525	10.4966	525	0	0
0	525	0	525	0	525	0	525	10.5066	525	0	0
0	525	0	525	0	525	0	525	10.5166	525	0	0
0	525	0	525	0	525	0	525	10.5267	525	0	0
0	525	0	525	0	525	0	525	10.5367	525	0	0
0	525	0	525	0	525	0	525	10.5467	525	0	0
0	525	0	525	0	525	0	525	10.5567	525	0	0
0	525	0	525	0	525	0	525	10.5667	525	0	0
0	525	0	525	0	525	0	525	10.5767	525	0	0
0	525	0	525	0	525	0	525	10.5867	525	0	0
0	525	0	525	0	525	0	525	10.5968	525	0	0
0	525	0	525	0	525	0	525	10.6068	525	0	0
0	525	0	525	0	525	0	525	10.6168	525	0	0
0	525	0	525	0	525	0	525	10.6268	525	0	0
0	525	0	525	0	525	0	525	10.6368	525	0	0
0	525	0	525	0	525	0	525	10.6468	525	0	0
0	525	0	525	0	525	0	525	10.6569	525	0	0
0	525	0	525	0	525	0	525	10.6669	525	0	0
0	525	0	525	0	525	0	525	10.6769	525	0	0
0	525	0	525	0	525	0	525	10.6869	525	0	0
0	525	0	525	0	525	0	525	10.6969	525	0	0
0	525	0	525	0	525	0	525	10.7069	525	0	0
0	525	0	525	0	525	0	525	10.717	525	0	0
0	525	0	525	0	525	0	525	10.727	525	0	0
0	525	0	525	0	525	0	525	10.737	525	0	0
0	525	0	525	0	525	0	525	10.747	525	0	0
0	525	0	525	0	525	0	525	10.757	525	0	0
0	525	0	525	0	525	0	525	10.767	525	0	0
0	525	0	525	0	525	0	525	10.7771	525	0	0
0	525	0	525	0	525	0	525	10.7871	525	0	0
0	525	0	525	0	525	0	525	10.7971	525	0	0
0	525	0	525	0	525	0	525	10.8071	525	0	0
0	525	0	525	0	525	0	525	10.8171	525	0	0
0	525	0	525	0	525	0	525	10.8271	525	0	0
0	525	0	525	0	525	0	525	10.8371	525	0	0
0	525	0	525	0	525	0	525	10.8472	525	0	0
0	525	0	525	0	525	0	525	10.8572	525	0	0
0	525	0	525	0	525	0	525	10.8672	525	0	0
0	525	0	525	0	525	0	525	10.8772	525	0	0
0	525	0	525	0	525	0	525	10.8872	525	0	0
0	525	0	525	0	525	0	525	10.8972	525	0	0
0	525	0	525	0	525	0	525	10.9073	525	0	0
0	525	0	525	0	525	0	525	10.9173	525	0	0
0	525	0	525	0	525	0	525	10.9273	525	0	0
0	525	0	525	0	525	0	525	10.9373	525	0	0
0	525	0	525	0	525	0	525	10.9473	525	0	0
0	525	0	525	0	525	0	525	10.9573	525	0	0
0	525	0	525	0	525	0	525	10.9674	525	0	0
0	525	0	525	0	525	0	525	10.9774	525	0	0
0	525	0	525	0	525	0	525	10.9874	525	0	0
0	525	0	525	0	525	0	525	10.9974	525	0	0
0	525	0	525	0	525	0	525	11.0074	525	0	0
0	525	0	525	0	525	0	525	11.0174	525	0	0
0	525	0	525	0	525	0	525	11.0274	525	0	0
0	525	0	525	0	525	0	525	11.0375	525	0	0
0	525	0	525	0	525	0	525	11.0475	525	0	0
0	525	0	525	0	525	0	525	11.0575	525	0	0
0	525	0	525	0	525	0	525	11.0675	525	0	0
0	525	0	525	0	525	0	525	11.0775	525	0	0
0	525	0	525	0	525	0	525	11.0875	525	0	0
0	525	0	525	0	525	0	525	11.0976	525	0	0
0	525	0	525	0	525	0	525	11.1076	525	0	0
0	525	0	525	0	525	0	525	11.1176	525	0	0
0	525	0	525	0	525	0	525	11.1276	525	0	0
0	525	0	525	0	525	0	525	11.1376	525	0	0
0	525	0	525	0	525	0	525	11.1476	525	0	0
0	525	0	525	0	525	0	525	11.1577	525	0	0
0	525	0	525	0	525	0	525	11.1677	525	0	0
0	525	0	525	0	525	0	525	11.1777	525	0	0
0	525	0	525	0	525	0	525	11.1877	525	0	0
0	525	0	525	0	525	0	525	11.1977	525	0	0
0	525	0	525	0	525	0	525	11.2077	525	0	0
0	525	0	525	0	525	0	525	11.2177	525	0	0
0	525	0	525	0	525	0	525	11.2278	525	0	0
0	525	0	525	0	525	0	525	11.2378	525	0	0
0	525	0	525	0	525	0	525	11.2478	525	0	0
0	525	0	525	0	525	0	525	11.2578	525	0	0
0	525	0	525	0	525	0	525	11.2678	525	0	0
0	525	0	525	0	525	0	525	11.2778	525	0	0
0	525	0	525	0	525	0	525	11.2879	525	0	0
0	525	0	525	0	525	0	525	11.2979	525	0	0
0	525	0	525	0	525	0	525	11.3079	525	0	0
0	525	0	525	0	525	0	525	11.3179	525	0	0
0	525	0	525	0	525	0	525	11.3279	525	0	0
0	525	0	525	0	525	0	525	11.3379	525	0	0
0	525	0	525	0	525	0	525	11.348	525	0	0
0	525	0	525	0	525	0	525	11.358	525	0	0
0	525	0	525	0	525	0	525	11.368	525	0	0
0	525	0	525	0	525	0	525	11.378	525	0	0
0	525	0	525	0	525	0	525	11.388	525	0	0
0	525	0	525	0	525	0	525	11.398	525	0	0
0	525	0	525	0	525	0	525	11.408	525	0	0
0	525	0	525	0	525	0	525	11.4181	525	0	0
0	525	0	525	0	525	0	525	11.4281	525	0	0
0	525	0	525	0	525	0	525	11.4381	525	0	0
0	525	0	525	0	525	0	525	11.4481	525	0	0
0	525	0	525	0	525	0	525	11.4581	525	0	0
0	525	0	525	0	525	0	525	11.4681	525	0	0
0	525	0	525	0	525	0	525	11.4782	525	0	0
0	525	0	525	0	525	0	525	11.4882	525	0	0
0	525	0	525	0	525	0	525	11.4982	525	0	0
0	525	0	525	0	525	0	525	11.5082	525	0	0
0	525	0	525	0	525	0	525	11.5182	525	0	0
0	525	0	525	0	525	0	525	11.5282	525	0	0
0	525	0	525	0	525	0	525	11.5383	525	0	0
0	525	0	525	0	525	0	525	11.5483	525	0	0
0	525	0	525	0	525	0	525	11.5583	525	0	0
0	525	0	525	0	525	0	525	11.5683	525	0	0
0	525	0	525	0	525	0	525	11.5783	525	0	0
0	525	0	525	0	525	0	525	11.5883	525	0	0
0	525	0	525	0	525	0	525	11.5983	525	0	0
0	525	0	525	0	525	0	525	11.6084	525	0	0
0	525	0	525	0	525	0	525	11.6184	525	0	0
0	525	0	525	0	525	0	525	11.6284	525	0	0
0	525	0	525	0	525	0	525	11.6384	525	0	0
0	525	0	525	0	525	0	525	11.6484	525	0	0
0	525	0	525	0	525	0	525	11.6584	525	0	0
0	525	0	525	0	525	0	525	11.6685	525	0	0
0	525	0	525	0	525	0	525	11.6785	525	0	0
0	525	0	525	0	525	0	525	11.6885	525	0	0
0	525	0	525	0	525	0	525	11.6985	525	0	0
0	525	0	525	0	525	0	525	11.7085	525	0	0
0	525	0	525	0	525	0	525	11.7185	525	0	0
0	525	0	525	0	525	0	525	11.7286	525	0	0
0	525	0	525	0	525	0	525	11.7386	525	0	0
0	525	0	525	0	525	0	525	11.7486	525	0	0
0	525	0	525	0	525	0	525	11.7586	525	0	0
0	525	0	525	0	525	0	525	11.7686	525	0	0
0	525	0	525	0	525	0	525	11.7786	525	0	0
0	525	0	525	0	525	0	525	11.7887	525	0	0
0	525	0	525	0	525	0	525	11.7987	525	0	0
0	525	0	525	0	525	0	525	11.8087	525	0	0
0	525	0	525	0	525	0	525	11.8187	525	0	0
0	525	0	525	0	525	0	525	11.8287	525	0	0
0	525	0	525	0	525	0	525	11.8387	525	0	0
0	525	0	525	0	525	0	525	11.8487	525	0	0
0	525	0	525	0	525	0	525	11.8588	525	0	0
0	525	0	525	0	525	0	525	11.8688	525	0	0
0	525	0	525	0	525	0	525	11.8788	525	0	0
0	525	0	525	0	525	0	525	11.8888	525	0	0
0	525	0	525	0	525	0	525	11.8988	525	0	0
0	525	0	525	0	525	0	525	11.9088	525	0	0
0	525	0	525	0	525	0	525	11.9189	525	0	0
0	525	0	525	0	525	0	525	11.9289	525	0	0
0	525	0	525	0	525	0	525	11.9389	525	0	0
0	525	0	525	0	525	0	525	11.9489	525	0	0
0	525	0	525	0	525	0	525	11.9589	525	0	0
0	525	0	525	0	525	0	525	11.9689	525	0	0
0	525	0	525	0	525	0	525	11.979	525	0	0
0	525	0	525	0	525	0	525	11.989	525	0	0
0	525	0	525	0	525	0	525	11.999	525	0	0
0	525	0	525	0	525	0	525	12.009	525	0	0
0	525	0	525	0	525	0	525	12.019	525	0	0
0	525	0	525	0	525	0	525	12.029	525	0	0
0	525	0	525	0	525	0	525	12.039	525	0	0
0	525	0	525	0	525	0	525	12.0491	525	0	0
0	525	0	525	0	525	0	525	12.0591	525	0	0
0	525	0	525	0	525	0	525	12.0691	525	0	0
0	525	0	525	0	525	0	525	12.0791	525	0	0
0	525	0	525	0	525	0	525	12.0891	525	0	0
0	525	0	525	0	525	0	525	12.0991	525	0	0
0	525	0	525	0	525	0	525	12.1092	525	0	0
0	525	0	525	0	525	0	525	12.1192	525	0	0
0	525	0	525	0	525	0	525	12.1292	525	0	0
0	525	0	525	0	525	0	525	12.1392	525	0	0
0	525	0	525	0	525	0	525	12.1492	525	0	0
0	525	0	525	0	525	0	525	12.1592	525	0	0
0	525	0	525	0	525	0	525	12.1693	525	0	0
0	525	0	525	0	525	0	525	12.1793	525	0	0
0	525	0	525	0	525	0	525	12.1893	525	0	0
0	525	0	525	0	525	0	525	12.1993	525	0	0
0	525	0	525	0	525	0	525	12.2093	525	0	0
0	525	0	525	0	525	0	525	12.2193	525	0	0
0	525	0	525	0	525	0	525	12.2293	525	0	0
0	525	0	525	0	525	0	525	12.2394	525	0	0
0	525	0	525	0	525	0	525	12.2494	525	0	0
0	525	0	525	0	525	0	525	12.2594	525	0	0
0	525	0	525	0	525	0	525	12.2694	525	0	0
0	525	0	525	0	525	0	525	12.2794	525	0	0
0	525	0	525	0	525	0	525	12.2894	525	0	0
0	525	0	525	0	525	0	525	12.2995	525	0	0
0	525	0	525	0	525	0	525	12.3095	525	0	0
0	525	0	525	0	525	0	525	12.3195	525	0	0
0	525	0	525	0	525	0	525	12.3295	525	0	0
0	525	0	525	0	525	0	525	12.3395	525	0	0
0	525	0	525	0	525	0	525	12.3495	525	0	0
0	525	0	525	0	525	0	525	12.3596	525	0	0
0	525	0	525	0	525	0	525	12.3696	525	0	0
0	525	0	525	0	525	0	525	12.3796	525	0	0
0	525	0	525	0	525	0	525	12.3896	525	0	0
0	525	0	525	0	525	0	525	12.3996	525	0	0
0	525	0	525	0	525	0	525	12.4096	525	0	0
0	525	0	525	0	525	0	525	12.4196	525	0	0
0	525	0	525	0	525	0	525	12.4297	525	0	0
0	525	0	525	0	525	0	525	12.4397	525	0	0
0	525	0	525	0	525	0	525	12.4497	525	0	0
0	525	0	525	0	525	0	525	12.4597	525	0	0
0	525	0	525	0	525	0	525	12.4697	525	0	0
0	525	0	525	0	525	0	525	12.4797	525	0	0
0	525	0	525	0	525	0	525	12.4898	525	0	0
0	525	0	525	0	525	0	525	12.4998	525	0	0
0	525	0	525	0	525	0	525	12.5098	525	0	0
0	525	0	525	0	525	0	525	12.5198	525	0	0
0	525	0	525	0	525	0	525	12.5298	525	0	0
0	525	0	525	0	525	0	525	12.5398	525	0	0
0	525	0	525	0	525	0	525	12.5499	525	0	0
0	525	0	525	0	525	0	525	12.5599	525	0	0
0	525	0	525	0	525	0	525	12.5699	525	0	0
0	525	0	525	0	525	0	525	12.5799	525	0	0
0	525	0	525	0	525	0	525	12.5899	525	0	0
0	525	0	525	0	525	0	525	12.5999	525	0	0
0	525	0	525	0	525	0	525	12.6099	525	0	0
0	525	0	525	0	525	0	525	12.62	525	0	0
0	525	0	525	0	525	0	525	12.63	525	0	0
0	525	0	525	0	525	0	525	12.64	525	0	0
0	525	0	525	0	525	0	525	12.65	525	0	0
0	525	0	525	0	525	0	525	12.66	525	0	0
0	525	0	525	0	525	0	525	12.67	525	0	0
0	525	0	525	0	525	0	525	12.6801	525	0	0
0	525	0	525	0	525	0	525	12.6901	525	0	0
0	525	0	525	0	525	0	525	12.7001	525	0	0
0	525	0	525	0	525	0	525	12.7101	525	0	0
0	525	0	525	0	525	0	525	12.7201	525	0	0
0	525	0	525	0	525	0	525	12.7301	525	0	0
0	525	0	525	0	525	0	525	12.7402	525	0	0
0	525	0	525	0	525	0	525	12.7502	525	0	0
0	525	0	525	0	525	0	525	12.7602	525	0	0
0	525	0	525	0	525	0	525	12.7702	525	0	0
0	525	0	525	0	525	0	525	12.7802	525	0	0
0	525	0	525	0	525	0	525	12.7902	525	0	0
0	525	0	525	0	525	0	525	12.8003	525	0	0
0	525	0	525	0	525	0	525	12.8103	525	0	0
0	525	0	525	0	525	0	525	12.8203	525	0	0
0	525	0	525	0	525	0	525	12.8303	525	0	0
0	525	0	525	0	525	0	525	12.8403	525	0	0
0	525	0	525	0	525	0	525	12.8503	525	0	0
0	525	0	525	0	525	0	525	12.8603	525	0	0
0	525	0	525	0	525	0	525	12.8704	525	0	0
0	525	0	525	0	525	0	525	12.8804	525	0	0
0	525	0	525	0	525	0	525	12.8904	525	0	0
0	525	0	525	0	525	0	525	12.9004	525	0	0
0	525	0	525	0	525	0	525	12.9104	525	0	0
0	525	0	525	0	525	0	525	12.9204	525	0	0
0	525	0	525	0	525	0	525	12.9305	525	0	0
0	525	0	525	0	525	0	525	12.9405	525	0	0
0	525	0	525	0	525	0	525	12.9505	525	0	0
0	525	0	525	0	525	0	525	12.9605	525	0	0
0	525	0	525	0	525	0	525	12.9705	525	0	0
0	525	0	525	0	525	0	525	12.9805	525	0	0
0	525	0	525	0	525	0	525	12.9906	525	0	0
0	525	0	525	0	525	0	525	13.0006	525	0	0
0	525	0	525	0	525	0	525	13.0106	525	0	0
0	525	0	525	0	525	0	525	13.0206	525	0	0
0	525	0	525	0	525	0	525	13.0306	525	0	0
0	525	0	525	0	525	0	525	13.0406	525	0	0
0	525	0	525	0	525	0	525	13.0506	525	0	0
0	525	0	525	0	525	0	525	13.0607	525	0	0
0	525	0	525	0	525	0	525	13.0707	525	0	0
0	525	0	525	0	525	0	525	13.0807	525	0	0
0	525	0	525	0	525	0	525	13.0907	525	0	0
0	525	0	525	0	525	0	525	13.1007	525	0	0
0	525	0	525	0	525	0	525	13.1107	525	0	0
0	525	0	525	0	525	0	525	13.1208	525	0	0
0	525	0	525	0	525	0	525	13.1308	525	0	0
0	525	0	525	0	525	0	525	13.1408	525	0	0
0	525	0	525	0	525	0	525	13.1508	525	0	0
0	525	0	525	0	525	0	525	13.1608	525	0	0
0	525	0	525	0	525	0	525	13.1708	525	0	0
0	525	0	525	0	525	0	525	13.1809	525	0	0
0	525	0	525	0	525	0	525	13.1909	525	0	0
0	525	0	525	0	525	0	525	13.2009	525	0	0
0	525	0	525	0	525	0	525	13.2109	525	0	0
0	525	0	525	0	525	0	525	13.2209	525	0	0
0	525	0	525	0	525	0	525	13.2309	525	0	0
0	525	0	525	0	525	0	525	13.2409	525	0	0
0	525	0	525	0	525	0	525	13.251	525	0	0
0	525	0	525	0	525	0	525	13.261	525	0	0
0	525	0	525	0	525	0	525	13.271	525	0	0
0	525	0	525	0	525	0	525	13.281	525	0	0
0	525	0	525	0	525	0	525	13.291	525	0	0
0	525	0	525	0	525	0	525	13.301	525	0	0
0	525	0	525	0	525	0	525	13.3111	525	0	0
0	525	0	525	0	525	0	525	13.3211	525	0	0
0	525	0	525	0	525	0	525	13.3311	525	0	0
0	525	0	525	0	525	0	525	13.3411	525	0	0
0	525	0	525	0	525	0	525	13.3511	525	0	0
0	525	0	525	0	525	0	525	13.3611	525	0	0
0	525	0	525	0	525	0	525	13.3712	525	0	0
0	525	0	525	0	525	0	525	13.3812	525	0	0
0	525	0	525	0	525	0	525	13.3912	525	0	0
0	525	0	525	0	525	0	525	13.4012	525	0	0
0	525	0	525	0	525	0	525	13.4112	525	0	0
0	525	0	525	0	525	0	525	13.4212	525	0	0
0	525	0	525	0	525	0	525	13.4312	525	0	0
0	525	0	525	0	525	0	525	13.4413	525	0	0
0	525	0	525	0	525	0	525	13.4513	525	0	0
0	525	0	525	0	525	0	525	13.4613	525	0	0
0	525	0	525	0	525	0	525	13.4713	525	0	0
0	525	0	525	0	525	0	525	13.4813	525	0	0
0	525	0	525	0	525	0	525	13.4913	525	0	0
0	525	0	525	0	525	0	525	13.5014	525	0	0
0	525	0	525	0	525	0	525	13.5114	525	0	0
0	525	0	525	0	525	0	525	13.5214	525	0	0
0	525	0	525	0	525	0	525	13.5314	525	0	0
0	525	0	525	0	525	0	525	13.5414	525	0	0
0	525	0	525	0	525	0	525	13.5514	525	0	0
0	525	0	525	0	525	0	525	13.5615	525	0	0
0	525	0	525	0	525	0	525	13.5715	525	0	0
0	525	0	525	0	525	0	525	13.5815	525	0	0
0	525	0	525	0	525	0	525	13.5915	525	0	0
0	525	0	525	0	525	0	525	13.6015	525	0	0
0	525	0	525	0	525	0	525	13.6115	525	0	0
0	525	0	525	0	525	0	525	13.6216	525	0	0
0	525	0	525	0	525	0	525	13.6316	525	0	0
0	525	0	525	0	525	0	525	13.6416	525	0	0
0	525	0	525	0	525	0	525	13.6516	525	0	0
0	525	0	525	0	525	0	525	13.6616	525	0	0
0	525	0	525	0	525	0	525	13.6716	525	0	0
0	525	0	525	0	525	0	525	13.6816	525	0	0
0	525	0	525	0	525	0	525	13.6917	525	0	0
0	525	0	525	0	525	0	525	13.7017	525	0	0
0	525	0	525	0	525	0	525	13.7117	525	0	0
0	525	0	525	0	525	0	525	13.7217	525	0	0
0	525	0	525	0	525	0	525	13.7317	525	0	0
0	525	0	525	0	525	0	525	13.7417	525	0	0
0	525	0	525	0	525	0	525	13.7518	525	0	0
0	525	0	525	0	525	0	525	13.7618	525	0	0
0	525	0	525	0	525	0	525	13.7718	525	0	0
0	525	0	525	0	525	0	525	13.7818	525	0	0
0	525	0	525	0	525	0	525	13.7918	525	0	0
0	525	0	525	0	525	0	525	13.8018	525	0	0
0	525	0	525	0	525	0	525	13.8119	525	0	0
0	525	0	525	0	525	0	525	13.8219	525	0	0
0	525	0	525	0	525	0	525	13.8319	525	0	0
0	525	0	525	0	525	0	525	13.8419	525	0	0
0	525	0	525	0	525	0	525	13.8519	525	0	0
0	525	0	525	0	525	0	525	13.8619	525	0	0
0	525	0	525	0	525	0	525	13.8719	525	0	0
0	525	0	525	0	525	0	525	13.882	525	0	0
0	525	0	525	0	525	0	525	13.892	525	0	0
0	525	0	525	0	525	0	525	13.902	525	0	0
0	525	0	525	0	525	0	525	13.912	525	0	0
0	525	0	525	0	525	0	525	13.922	525	0	0
0	525	0	525	0	525	0	525	13.932	525	0	0
0	525	0	525	0	525	0	525	13.9421	525	0	0
0	525	0	525	0	525	0	525	13.9521	525	0	0
0	525	0	525	0	525	0	525	13.9621	525	0	0
0	525	0	525	0	525	0	525	13.9721	525	0	0
0	525	0	525	0	525	0	525	13.9821	525	0	0
0	525	0	525	0	525	0	525	13.9921	525	0	0
0	525	0	525	0	525	0	525	14.0022	525	0	0
0	525	0	525	0	525	0	525	14.0122	525	0	0
0	525	0	525	0	525	0	525	14.0222	525	0	0
0	525	0	525	0	525	0	525	14.0322	525	0	0
0	525	0	525	0	525	0	525	14.0422	525	0	0
0	525	0	525	0	525	0	525	14.0522	525	0	0
0	525	0	525	0	525	0	525	14.0622	525	0	0
0	525	0	525	0	525	0	525	14.0723	525	0	0
0	525	0	525	0	525	0	525	14.0823	525	0	0
0	525	0	525	0	525	0	525	14.0923	525	0	0
0	525	0	525	0	525	0	525	14.1023	525	0	0
0	525	0	525	0	525	0	525	14.1123	525	0	0
0	525	0	525	0	525	0	525	14.1223	525	0	0
0	525	0	525	0	525	0	525	14.1324	525	0	0
0	525	0	525	0	525	0	525	14.1424	525	0	0
0	525	0	525	0	525	0	525	14.1524	525	0	0
0	525	0	525	0	525	0	525	14.1624	525	0	0
0	525	0	525	0	525	0	525	14.1724	525	0	0
0	525	0	525	0	525	0	525	14.1824	525	0	0
0	525	0	525	0	525	0	525	14.1925	525	0	0
0	525	0	525	0	525	0	525	14.2025	525	0	0
0	525	0	525	0	525	0	525	14.2125	525	0	0
0	525	0	525	0	525	0	525	14.2225	525	0	0
0	525	0	525	0	525	0	525	14.2325	525	0	0
0	525	0	525	0	525	0	525	14.2425	525	0	0
0	525	0	525	0	525	0	525	14.2525	525	0	0
0	525	0	525	0	525	0	525	14.2626	525	0	0
0	525	0	525	0	525	0	525	14.2726	525	0	0
0	525	0	525	0	525	0	525	14.2826	525	0	0
0	525	0	525	0	525	0	525	14.2926	525	0	0
0	525	0	525	0	525	0	525	14.3026	525	0	0
0	525	0	525	0	525	0	525	14.3126	525	0	0
0	525	0	525	0	525	0	525	14.3227	525	0	0
0	525	0	525	0	525	0	525	14.3327	525	0	0
0	525	0	525	0	525	0	525	14.3427	525	0	0
0	525	0	525	0	525	0	525	14.3527	525	0	0
0	525	0	525	0	525	0	525	14.3627	525	0	0
0	525	0	525	0	525	0	525	14.3727	525	0	0
0	525	0	525	0	525	0	525	14.3828	525	0	0
0	525	0	525	0	525	0	525	14.3928	525	0	0
0	525	0	525	0	525	0	525	14.4028	525	0	0
0	525	0	525	0	525	0	525	14.4128	525	0	0
0	525	0	525	0	525	0	525	14.4228	525	0	0
0	525	0	525	0	525	0	525	14.4328	525	0	0
0	525	0	525	0	525	0	525	14.4428	525	0	0
0	525	0	525	0	525	0	525	14.4529	525	0	0
0	525	0	525	0	525	0	525	14.4629	525	0	0
0	525	0	525	0	525	0	525	14.4729	525	0	0
0	525	0	525	0	525	0	525	14.4829	525	0	0
0	525	0	525	0	525	0	525	14.4929	525	0	0
0	525	0	525	0	525	0	525	14.5029	525	0	0
0	525	0	525	0	525	0	525	14.513	525	0	0
0	525	0	525	0	525	0	525	14.523	525	0	0
0	525	0	525	0	525	0	525	14.533	525	0	0
0	525	0	525	0	525	0	525	14.543	525	0	0
0	525	0	525	0	525	0	525	14.553	525	0	0
0	525	0	525	0	525	0	525	14.563	525	0	0
0	525	0	525	0	525	0	525	14.5731	525	0	0
0	525	0	525	0	525	0	525	14.5831	525	0	0
0	525	0	525	0	525	0	525	14.5931	525	0	0
0	525	0	525	0	525	0	525	14.6031	525	0	0
0	525	0	525	0	525	0	525	14.6131	525	0	0
0	525	0	525	0	525	0	525	14.6231	525	0	0
0	525	0	525	0	525	0	525	14.6332	525	0	0
0	525	0	525	0	525	0	525	14.6432	525	0	0
0	525	0	525	0	525	0	525	14.6532	525	0	0
0	525	0	525	0	525	0	525	14.6632	525	0	0
0	525	0	525	0	525	0	525	14.6732	525	0	0
0	525	0	525	0	525	0	525	14.6832	525	0	0
0	525	0	525	0	525	0	525	14.6932	525	0	0
0	525	0	525	0	525	0	525	14.7033	525	0	0
0	525	0	525	0	525	0	525	14.7133	525	0	0
0	525	0	525	0	525	0	525	14.7233	525	0	0
0	525	0	525	0	525	0	525	14.7333	525	0	0
0	525	0	525	0	525	0	525	14.7433	525	0	0
0	525	0	525	0	525	0	525	14.7533	525	0	0
0	525	0	525	0	525	0	525	14.7634	525	0	0
0	525	0	525	0	525	0	525	14.7734	525	0	0
0	525	0	525	0	525	0	525	14.7834	525	0	0
0	525	0	525	0	525	0	525	14.7934	525	0	0
0	525	0	525	0	525	0	525	14.8034	525	0	0
0	525	0	525	0	525	0	525	14.8134	525	0	0
0	525	0	525	0	525	0	525	14.8235	525	0	0
0	525	0	525	0	525	0	525	14.8335	525	0	0
0	525	0	525	0	525	0	525	14.8435	525	0	0
0	525	0	525	0	525	0	525	14.8535	525	0	0
0	525	0	525	0	525	0	525	14.8635	525	0	0
0	525	0	525	0	525	0	525	14.8735	525	0	0
0	525	0	525	0	525	0	525	14.8835	525	0	0
0	525	0	525	0	525	0	525	14.8936	525	0	0
0	525	0	525	0	525	0	525	14.9036	525	0	0
0	525	0	525	0	525	0	525	14.9136	525	0	0
0	525	0	525	0	525	0	525	14.9236	525	0	0
0	525	0	525	0	525	0	525	14.9336	525	0	0
0	525	0	525	0	525	0	525	14.9436	525	0	0
0	525	0	525	0	525	0	525	14.9537	525	0	0
0	525	0	525	0	525	0	525	14.9637	525	0	0
0	525	0	525	0	525	0	525	14.9737	525	0	0
0	525	0	525	0	525	0	525	14.9837	525	0	0
0	525	0	525	0	525	0	525	14.9937	525	0	0
0	525	0	525	0	525	0	525	15.0037	525	0	0
0	525	0	525	0	525	0	525	15.0138	525	0	0
0	525	0	525	0	525	0	525	15.0238	525	0	0
0	525	0	525	0	525	0	525	15.0338	525	0	0
0	525	0	525	0	525	0	525	15.0438	525	0	0
0	525	0	525	0	525	0	525	15.0538	525	0	0
0	525	0	525	0	525	0	525	15.0638	525	0	0
0	525	0	525	0	525	0	525	15.0738	525	0	0
0	525	0	525	0	525	0	525	15.0839	525	0	0
0	525	0	525	0	525	0	525	15.0939	525	0	0
0	525	0	525	0	525	0	525	15.1039	525	0	0
0	525	0	525	0	525	0	525	15.1139	525	0	0
0	525	0	525	0	525	0	525	15.1239	525	0	0
0	525	0	525	0	525	0	525	15.1339	525	0	0
0	525	0	525	0	525	0	525	15.144	525	0	0
0	525	0	525	0	525	0	525	15.154	525	0	0
0	525	0	525	0	525	0	525	15.164	525	0	0
0	525	0	525	0	525	0	525	15.174	525	0	0
0	525	0	525	0	525	0	525	15.184	525	0	0
0	525	0	525	0	525	0	525	15.194	525	0	0
0	525	0	525	0	525	0	525	15.2041	525	0	0
0	525	0	525	0	525	0	525	15.2141	525	0	0
0	525	0	525	0	525	0	525	15.2241	525	0	0
0	525	0	525	0	525	0	525	15.2341	525	0	0
0	525	0	525	0	525	0	525	15.2441	525	0	0
0	525	0	525	0	525	0	525	15.2541	525	0	0
0	525	0	525	0	525	0	525	15.2641	525	0	0
0	525	0	525	0	525	0	525	15.2742	525	0	0
0	525	0	525	0	525	0	525	15.2842	525	0	0
0	525	0	525	0	525	0	525	15.2942	525	0	0
0	525	0	525	0	525	0	525	15.3042	525	0	0
0	525	0	525	0	525	0	525	15.3142	525	0	0
0	525	0	525	0	525	0	525	15.3242	525	0	0
0	525	0	525	0	525	0	525	15.3343	525	0	0
0	525	0	525	0	525	0	525	15.3443	525	0	0
0	525	0	525	0	525	0	525	15.3543	525	0	0
0	525	0	525	0	525	0	525	15.3643	525	0	0
0	525	0	525	0	525	0	525	15.3743	525	0	0
0	525	0	525	0	525	0	525	15.3843	525	0	0
0	525	0	525	0	525	0	525	15.3944	525	0	0
0	525	0	525	0	525	0	525	15.4044	525	0	0
0	525	0	525	0	525	0	525	15.4144	525	0	0
0	525	0	525	0	525	0	525	15.4244	525	0	0
0	525	0	525	0	525	0	525	15.4344	525	0	0
0	525	0	525	0	525	0	525	15.4444	525	0	0
0	525	0	525	0	525	0	525	15.4545	525	0	0
0	525	0	525	0	525	0	525	15.4645	525	0	0
0	525	0	525	0	525	0	525	15.4745	525	0	0
0	525	0	525	0	525	0	525	15.4845	525	0	0
0	525	0	525	0	525	0	525	15.4945	525	0	0
0	525	0	525	0	525	0	525	15.5045	525	0	0
0	525	0	525	0	525	0	525	15.5145	525	0	0
0	525	0	525	0	525	0	525	15.5246	525	0	0
0	525	0	525	0	525	0	525	15.5346	525	0	0
0	525	0	525	0	525	0	525	15.5446	525	0	0
0	525	0	525	0	525	0	525	15.5546	525	0	0
0	525	0	525	0	525	0	525	15.5646	525	0	0
0	525	0	525	0	525	0	525	15.5746	525	0	0
0	525	0	525	0	525	0	525	15.5847	525	0	0
0	525	0	525	0	525	0	525	15.5947	525	0	0
0	525	0	525	0	525	0	525	15.6047	525	0	0
0	525	0	525	0	525	0	525	15.6147	525	0	0
0	525	0	525	0	525	0	525	15.6247	525	0	0
0	525	0	525	0	525	0	525	15.6347	525	0	0
0	525	0	525	0	525	0	525	15.6448	525	0	0
0	525	0	525	0	525	0	525	15.6548	525	0	0
0	525	0	525	0	525	0	525	15.6648	525	0	0
0	525	0	525	0	525	0	525	15.6748	525	0	0
0	525	0	525	0	525	0	525	15.6848	525	0	0
0	525	0	525	0	525	0	525	15.6948	525	0	0
0	525	0	525	0	525	0	525	15.7048	525	0	0
0	525	0	525	0	525	0	525	15.7149	525	0	0
0	525	0	525	0	525	0	525	15.7249	525	0	0
0	525	0	525	0	525	0	525	15.7349	525	0	0
0	525	0	525	0	525	0	525	15.7449	525	0	0
0	525	0	525	0	525	0	525	15.7549	525	0	0
0	525	0	525	0	525	0	525	15.7649	525	0	0
0	525	0	525	0	525	0	525	15.775	525	0	0
0	525	0	525	0	525	0	525	15.785	525	0	0
0	525	0	525	0	525	0	525	15.795	525	0	0
0	525	0	525	0	525	0	525	15.805	525	0	0
0	525	0	525	0	525	0	525	15.815	525	0	0
0	525	0	525	0	525	0	525	15.825	525	0	0
0	525	0	525	0	525	0	525	15.8351	525	0	0
0	525	0	525	0	525	0	525	15.8451	525	0	0
0	525	0	525	0	525	0	525	15.8551	525	0	0
0	525	0	525	0	525	0	525	15.8651	525	0	0
0	525	0	525	0	525	0	525	15.8751	525	0	0
0	525	0	525	0	525	0	525	15.8851	525	0	0
0	525	0	525	0	525	0	525	15.8951	525	0	0
0	525	0	525	0	525	0	525	15.9052	525	0	0
0	525	0	525	0	525	0	525	15.9152	525	0	0
0	525	0	525	0	525	0	525	15.9252	525	0	0
0	525	0	525	0	525	0	525	15.9352	525	0	0
0	525	0	525	0	525	0	525	15.9452	525	0	0
0	525	0	525	0	525	0	525	15.9552	525	0	0
0	525	0	525	0	525	0	525	15.9653	525	0	0
0	525	0	525	0	525	0	525	15.9753	525	0	0
0	525	0	525	0	525	0	525	15.9853	525	0	0
0	525	0	525	0	525	0	525	15.9953	525	0	0
0	525	0	525	0	525	0	525	16.0053	525	0	0
0	525	0	525	0	525	0	525	16.0153	525	0	0
0	525	0	525	0	525	0	525	16.0254	525	0	0
0	525	0	525	0	525	0	525	16.0354	525	0	0
0	525	0	525	0	525	0	525	16.0454	525	0	0
0	525	0	525	0	525	0	525	16.0554	525	0	0
0	525	0	525	0	525	0	525	16.0654	525	0	0
0	525	0	525	0	525	0	525	16.0754	525	0	0
0	525	0	525	0	525	0	525	16.0854	525	0	0
0	525	0	525	0	525	0	525	16.0955	525	0	0
0	525	0	525	0	525	0	525	16.1055	525	0	0
0	525	0	525	0	525	0	525	16.1155	525	0	0
0	525	0	525	0	525	0	525	16.1255	525	0	0
0	525	0	525	0	525	0	525	16.1355	525	0	0
0	525	0	525	0	525	0	525	16.1455	525	0	0
0	525	0	525	0	525	0	525	16.1556	525	0	0
0	525	0	525	0	525	0	525	16.1656	525	0	0
0	525	0	525	0	525	0	525	16.1756	525	0	0
0	525	0	525	0	525	0	525	16.1856	525	0	0
0	525	0	525	0	525	0	525	16.1956	525	0	0
0	525	0	525	0	525	0	525	16.2056	525	0	0
0	525	0	525	0	525	0	525	16.2157	525	0	0
0	525	0	525	0	525	0	525	16.2257	525	0	0
0	525	0	525	0	525	0	525	16.2357	525	0	0
0	525	0	525	0	525	0	525	16.2457	525	0	0
0	525	0	525	0	525	0	525	16.2557	525	0	0
0	525	0	525	0	525	0	525	16.2657	525	0	0
0	525	0	525	0	525	0	525	16.2757	525	0	0
0	525	0	525	0	525	0	525	16.2858	525	0	0
0	525	0	525	0	525	0	525	16.2958	525	0	0
0	525	0	525	0	525	0	525	16.3058	525	0	0
0	525	0	525	0	525	0	525	16.3158	525	0	0
0	525	0	525	0	525	0	525	16.3258	525	0	0
0	525	0	525	0	525	0	525	16.3358	525	0	0
0	525	0	525	0	525	0	525	16.3459	525	0	0
0	525	0	525	0	525	0	525	16.3559	525	0	0
0	525	0	525	0	525	0	525	16.3659	525	0	0
0	525	0	525	0	525	0	525	16.3759	525	0	0
0	525	0	525	0	525	0	525	16.3859	525	0	0
0	525	0	525	0	525	0	525	16.3959	525	0	0
0	525	0	525	0	525	0	525	16.406	525	0	0
0	525	0	525	0	525	0	525	16.416	525	0	0
0	525	0	525	0	525	0	525	16.426	525	0	0
0	525	0	525	0	525	0	525	16.436	525	0	0
0	525	0	525	0	525	0	525	16.446	525	0	0
0	525	0	525	0	525	0	525	16.456	525	0	0
0	525	0	525	0	525	0	525	16.4661	525	0	0
0	525	0	525	0	525	0	525	16.4761	525	0	0
0	525	0	525	0	525	0	525	16.4861	525	0	0
0	525	0	525	0	525	0	525	16.4961	525	0	0
0	525	0	525	0	525	0	525	16.5061	525	0	0
0	525	0	525	0	525	0	525	16.5161	525	0	0
0	525	0	525	0	525	0	525	16.5261	525	0	0
0	525	0	525	0	525	0	525	16.5362	525	0	0
0	525	0	525	0	525	0	525	16.5462	525	0	0
0	525	0	525	0	525	0	525	16.5562	525	0	0
0	525	0	525	0	525	0	525	16.5662	525	0	0
0	525	0	525	0	525	0	525	16.5762	525	0	0
0	525	0	525	0	525	0	525	16.5862	525	0	0
0	525	0	525	0	525	0	525	16.5963	525	0	0
0	525	0	525	0	525	0	525	16.6063	525	0	0
0	525	0	525	0	525	0	525	16.6163	525	0	0
0	525	0	525	0	525	0	525	16.6263	525	0	0
0	525	0	525	0	525	0	525	16.6363	525	0	0
0	525	0	525	0	525	0	525	16.6463	525	0	0
0	525	0	525	0	525	0	525	16.6564	525	0	0
0	525	0	525	0	525	0	525	16.6664	525	0	0
0	525	0	525	0	525	0	525	16.6764	525	0	0
0	525	0	525	0	525	0	525	16.6864	525	0	0
0	525	0	525	0	525	0	525	16.6964	525	0	0
0	525	0	525	0	525	0	525	16.7064	525	0	0
0	525	0	525	0	525	0	525	16.7164	525	0	0
0	525	0	525	0	525	0	525	16.7265	525	0	0
0	525	0	525	0	525	0	525	16.7365	525	0	0
0	525	0	525	0	525	0	525	16.7465	525	0	0
0	525	0	525	0	525	0	525	16.7565	525	0	0
0	525	0	525	0	525	0	525	16.7665	525	0	0
0	525	0	525	0	525	0	525	16.7765	525	0	0
0	525	0	525	0	525	0	525	16.7866	525	0	0
0	525	0	525	0	525	0	525	16.7966	525	0	0
0	525	0	525	0	525	0	525	16.8066	525	0	0
0	525	0	525	0	525	0	525	16.8166	525	0	0
0	525	0	525	0	525	0	525	16.8266	525	0	0
0	525	0	525	0	525	0	525	16.8366	525	0	0
0	525	0	525	0	525	0	525	16.8467	525	0	0
0	525	0	525	0	525	0	525	16.8567	525	0	0
0	525	0	525	0	525	0	525	16.8667	525	0	0
0	525	0	525	0	525	0	525	16.8767	525	0	0
0	525	0	525	0	525	0	525	16.8867	525	0	0
0	525	0	525	0	525	0	525	16.8967	525	0	0
0	525	0	525	0	525	0	525	16.9067	525	0	0
0	525	0	525	0	525	0	525	16.9168	525	0	0
0	525	0	525	0	525	0	525	16.9268	525	0	0
0	525	0	525	0	525	0	525	16.9368	525	0	0
0	525	0	525	0	525	0	525	16.9468	525	0	0
0	525	0	525	0	525	0	525	16.9568	525	0	0
0	525	0	525	0	525	0	525	16.9668	525	0	0
0	525	0	525	0	525	0	525	16.9769	525	0	0
0	525	0	525	0	525	0	525	16.9869	525	0	0
0	525	0	525	0	525	0	525	16.9969	525	0	0
0	525	0	525	0	525	0	525	17.0069	525	0	0
0	525	0	525	0	525	0	525	17.0169	525	0	0
0	525	0	525	0	525	0	525	17.0269	525	0	0
0	525	0	525	0	525	0	525	17.037	525	0	0
0	525	0	525	0	525	0	525	17.047	525	0	0
0	525	0	525	0	525	0	525	17.057	525	0	0
0	525	0	525	0	525	0	525	17.067	525	0	0
0	525	0	525	0	525	0	525	17.077	525	0	0
0	525	0	525	0	525	0	525	17.087	525	0	0
0	525	0	525	0	525	0	525	17.097	525	0	0
0	525	0	525	0	525	0	525	17.1071	525	0	0
0	525	0	525	0	525	0	525	17.1171	525	0	0
0	525	0	525	0	525	0	525	17.1271	525	0	0
0	525	0	525	0	525	0	525	17.1371	525	0	0
0	525	0	525	0	525	0	525	17.1471	525	0	0
0	525	0	525	0	525	0	525	17.1571	525	0	0
0	525	0	525	0	525	0	525	17.1672	525	0	0
0	525	0	525	0	525	0	525	17.1772	525	0	0
0	525	0	525	0	525	0	525	17.1872	525	0	0
0	525	0	525	0	525	0	525	17.1972	525	0	0
0	525	0	525	0	525	0	525	17.2072	525	0	0
0	525	0	525	0	525	0	525	17.2172	525	0	0
0	525	0	525	0	525	0	525	17.2273	525	0	0
0	525	0	525	0	525	0	525	17.2373	525	0	0
0	525	0	525	0	525	0	525	17.2473	525	0	0
0	525	0	525	0	525	0	525	17.2573	525	0	0
0	525	0	525	0	525	0	525	17.2673	525	0	0
0	525	0	525	0	525	0	525	17.2773	525	0	0
0	525	0	525	0	525	0	525	17.2873	525	0	0
0	525	0	525	0	525	0	525	17.2974	525	0	0
0	525	0	525	0	525	0	525	17.3074	525	0	0
0	525	0	525	0	525	0	525	17.3174	525	0	0
0	525	0	525	0	525	0	525	17.3274	525	0	0
0	525	0	525	0	525	0	525	17.3374	525	0	0
0	525	0	525	0	525	0	525	17.3474	525	0	0
0	525	0	525	0	525	0	525	17.3575	525	0	0
0	525	0	525	0	525	0	525	17.3675	525	0	0
0	525	0	525	0	525	0	525	17.3775	525	0	0
0	525	0	525	0	525	0	525	17.3875	525	0	0
0	525	0	525	0	525	0	525	17.3975	525	0	0
0	525	0	525	0	525	0	525	17.4075	525	0	0
0	525	0	525	0	525	0	525	17.4176	525	0	0
0	525	0	525	0	525	0	525	17.4276	525	0	0
0	525	0	525	0	525	0	525	17.4376	525	0	0
0	525	0	525	0	525	0	525	17.4476	525	0	0
0	525	0	525	0	525	0	525	17.4576	525	0	0
0	525	0	525	0	525	0	525	17.4676	525	0	0
0	525	0	525	0	525	0	525	17.4777	525	0	0
0	525	0	525	0	525	0	525	17.4877	525	0	0
0	525	0	525	0	525	0	525	17.4977	525	0	0
0	525	0	525	0	525	0	525	17.5077	525	0	0
0	525	0	525	0	525	0	525	17.5177	525	0	0
0	525	0	525	0	525	0	525	17.5277	525	0	0
0	525	0	525	0	525	0	525	17.5377	525	0	0
0	525	0	525	0	525	0	525	17.5478	525	0	0
0	525	0	525	0	525	0	525	17.5578	525	0	0
0	525	0	525	0	525	0	525	17.5678	525	0	0
0	525	0	525	0	525	0	525	17.5778	525	0	0
0	525	0	525	0	525	0	525	17.5878	525	0	0
0	525	0	525	0	525	0	525	17.5978	525	0	0
0	525	0	525	0	525	0	525	17.6079	525	0	0
0	525	0	525	0	525	0	525	17.6179	525	0	0
0	525	0	525	0	525	0	525	17.6279	525	0	0
0	525	0	525	0	525	0	525	17.6379	525	0	0
0	525	0	525	0	525	0	525	17.6479	525	0	0
0	525	0	525	0	525	0	525	17.6579	525	0	0
0	525	0	525	0	525	0	525	17.668	525	0	0
0	525	0	525	0	525	0	525	17.678	525	0	0
0	525	0	525	0	525	0	525	17.688	525	0	0
0	525	0	525	0	525	0	525	17.698	525	0	0
0	525	0	525	0	525	0	525	17.708	525	0	0
0	525	0	525	0	525	0	525	17.718	525	0	0
0	525	0	525	0	525	0	525	17.728	525	0	0
0	525	0	525	0	525	0	525	17.7381	525	0	0
0	525	0	525	0	525	0	525	17.7481	525	0	0
0	525	0	525	0	525	0	525	17.7581	525	0	0
0	525	0	525	0	525	0	525	17.7681	525	0	0
0	525	0	525	0	525	0	525	17.7781	525	0	0
0	525	0	525	0	525	0	525	17.7881	525	0	0
0	525	0	525	0	525	0	525	17.7982	525	0	0
0	525	0	525	0	525	0	525	17.8082	525	0	0
0	525	0	525	0	525	0	525	17.8182	525	0	0
0	525	0	525	0	525	0	525	17.8282	525	0	0
0	525	0	525	0	525	0	525	17.8382	525	0	0
0	525	0	525	0	525	0	525	17.8482	525	0	0
0	525	0	525	0	525	0	525	17.8583	525	0	0
0	525	0	525	0	525	0	525	17.8683	525	0	0
0	525	0	525	0	525	0	525	17.8783	525	0	0
0	525	0	525	0	525	0	525	17.8883	525	0	0
0	525	0	525	0	525	0	525	17.8983	525	0	0
0	525	0	525	0	525	0	525	17.9083	525	0	0
0	525	0	525	0	525	0	525	17.9183	525	0	0
0	525	0	525	0	525	0	525	17.9284	525	0	0
0	525	0	525	0	525	0	525	17.9384	525	0	0
0	525	0	525	0	525	0	525	17.9484	525	0	0
0	525	0	525	0	525	0	525	17.9584	525	0	0
0	525	0	525	0	525	0	525	17.9684	525	0	0
0	525	0	525	0	525	0	525	17.9784	525	0	0
0	525	0	525	0	525	0	525	17.9885	525	0	0
0	525	0	525	0	525	0	525	17.9985	525	0	0
0	525	0	525	0	525	0	525	18.0085	525	0	0
0	525	0	525	0	525	0	525	18.0185	525	0	0
0	525	0	525	0	525	0	525	18.0285	525	0	0
0	525	0	525	0	525	0	525	18.0385	525	0	0
0	525	0	525	0	525	0	525	18.0486	525	0	0
0	525	0	525	0	525	0	525	18.0586	525	0	0
0	525	0	525	0	525	0	525	18.0686	525	0	0
0	525	0	525	0	525	0	525	18.0786	525	0	0
0	525	0	525	0	525	0	525	18.0886	525	0	0
0	525	0	525	0	525	0	525	18.0986	525	0	0
0	525	0	525	0	525	0	525	18.1086	525	0	0
0	525	0	525	0	525	0	525	18.1187	525	0	0
0	525	0	525	0	525	0	525	18.1287	525	0	0
0	525	0	525	0	525	0	525	18.1387	525	0	0
0	525	0	525	0	525	0	525	18.1487	525	0	0
0	525	0	525	0	525	0	525	18.1587	525	0	0
0	525	0	525	0	525	0	525	18.1687	525	0	0
0	525	0	525	0	525	0	525	18.1788	525	0	0
0	525	0	525	0	525	0	525	18.1888	525	0	0
0	525	0	525	0	525	0	525	18.1988	525	0	0
0	525	0	525	0	525	0	525	18.2088	525	0	0
0	525	0	525	0	525	0	525	18.2188	525	0	0
0	525	0	525	0	525	0	525	18.2288	525	0	0
0	525	0	525	0	525	0	525	18.2389	525	0	0
0	525	0	525	0	525	0	525	18.2489	525	0	0
0	525	0	525	0	525	0	525	18.2589	525	0	0
0	525	0	525	0	525	0	525	18.2689	525	0	0
0	525	0	525	0	525	0	525	18.2789	525	0	0
0	525	0	525	0	525	0	525	18.2889	525	0	0
0	525	0	525	0	525	0	525	18.299	525	0	0
0	525	0	525	0	525	0	525	18.309	525	0	0
0	525	0	525	0	525	0	525	18.319	525	0	0
0	525	0	525	0	525	0	525	18.329	525	0	0
0	525	0	525	0	525	0	525	18.339	525	0	0
0.22	525	0.15	525	0.28	525	0.28	525	18.349	525	0.2325	0.0309233
0.19	525	0.02	525	0.42	525	0.21	525	18.359	525	0.21	0.0819553
0.19	525	0.44	525	0.47	525	0.23	525	18.3691	525	0.3325	0.071458
0.27	525	0.46	525	0.95	525	0.08	525	18.3791	525	0.44	0.18686
-0.16	525	0.3	525	0.93	525	0.01	525	18.3891	525	0.27	0.239618
-0.03	525	0.4	525	1.31	525	0	525	18.3991	525	0.42	0.312437
-0.34	525	0.57	525	1.61	525	-0.02	525	18.4091	525	0.455	0.428651
-0.44	525	0.56	525	1.45	525	0.01	525	18.4191	525	0.395	0.406786
-0.74	525	0.7	525	0.56	525	0.55	525	18.4292	525	0.2675	0.337574
-0.76	525	0.73	525	0.56	525	0.1	525	18.4392	525	0.1575	0.333526
-0.55	525	0.7	525	0.46	525	-0.04	525	18.4492	525	0.1425	0.27756
-0.15	525	0.53	525	-0.05	525	-0.06	525	18.4592	525	0.0675	0.155798
-0.6	525	0.34	525	-0.37	525	0.04	525	18.4692	525	-0.1475	0.209578
-0.67	525	0.47	525	-0.2	525	0.1	525	18.4792	525	-0.075	0.241057
-0.63	525	0.44	525	-0.13	525	0.5	525	18.4893	525	0.045	0.266036
-0.41	525	0.4	525	-0.36	525	0.45	525	18.4993	525	0.02	0.234272
-0.23	525	0.67	525	-0.37	525	0.31	525	18.5093	525	0.095	0.241299
-0.43	525	0.55	525	-0.54	525	0.02	525	18.5193	525	-0.1	0.248227
-0.3	525	0.77	525	-0.25	525	-0.11	525	18.5293	525	0.0275	0.250745
-0.01	525	0.81	525	0.27	525	0.16	525	18.5393	525	0.3075	0.177124
-0.1	525	0.77	525	-0.12	525	0.1	525	18.5493	525	0.1625	0.208502
0.14	525	0.77	525	0.01	525	0	525	18.5594	525	0.23	0.182802
0.08	525	0.42	525	0.29	525	0.01	525	18.5694	525	0.2	0.0944281
-0.44	525	0.91	525	0.68	525	-0.1	525	18.5794	525	0.2625	0.318653
-0.09	525	0.6	525	-0.24	525	-0.02	525	18.5894	525	0.0625	0.184949
-0.44	525	0.88	525	-0.55	525	-0.03	525	18.5994	525	-0.035	0.324872
-0.25	525	0.76	525	-0.34	525	-0.1	525	18.6094	525	0.0175	0.252401
0.11	525	0.71	525	-0.03	525	0.06	525	18.6195	525	0.2125	0.168344
0	525	1.07	525	-0.09	525	0.25	525	18.6295	525	0.3075	0.264146
0.06	525	1.1	525	0.04	525	0.1	525	18.6395	525	0.325	0.258634
0.4	525	0.64	525	-0.18	525	0.38	525	18.6495	525	0.31	0.173686
0.07	525	0.67	525	-0.2	525	-0.02	525	18.6595	525	0.13	0.188547
-0.07	525	0.5	525	0.12	525	-0.03	525	18.6695	525	0.13	0.129936
-0.15	525	0.26	525	0.56	525	-0.16	525	18.6796	525	0.1275	0.17423
0	525	0.39	525	0.31	525	-0.3	525	18.6896	525	0.1	0.157639
0.31	525	0.31	525	-0.5	525	-0.12	525	18.6996	525	0	0.195064
-0.02	525	0.56	525	-0.84	525	0.1	525	18.7096	525	-0.05	0.29149
-0.01	525	0.94	525	-0.43	525	0.41	525	18.7196	525	0.2275	0.292927
-0.14	525	0.24	525	-0.47	525	0.21	525	18.7296	525	-0.04	0.167282
-0.77	525	-0.1	525	-0.32	525	0.23	525	18.7396	525	-0.24	0.209722
-0.73	525	0.15	525	-0.11	525	0.22	525	18.7497	525	-0.1175	0.216155
-0.29	525	0.21	525	0.05	525	0.42	525	18.7597	525	0.0975	0.149743
-0.4	525	0.33	525	-0.17	525	0.04	525	18.7697	525	-0.05	0.155295
-0.53	525	1.18	525	-0.19	525	0.11	525	18.7797	525	0.1425	0.369716
-0.58	525	1	525	-0.35	525	0.18	525	18.7897	525	0.0625	0.350675
-0.8	525	0.83	525	0.06	525	-0.09	525	18.7997	525	0	0.33424
-0.65	525	0.44	525	0.36	525	0.12	525	18.8098	525	0.0675	0.248642
-0.96	525	0.71	525	0.71	525	-0.1	525	18.8198	525	0.09	0.398685
-0.55	525	0.12	525	0.61	525	-0.08	525	18.8298	525	0.025	0.240295
-0.27	525	0.21	525	0.43	525	0.06	525	18.8398	525	0.1075	0.146991
-0.46	525	0.62	525	0.34	525	0.42	525	18.8498	525	0.23	0.237417
0.01	525	0.42	525	-0.22	525	0.14	525	18.8598	525	0.0875	0.133502
0.05	525	0.3	525	-0.03	525	-0.12	525	18.8699	525	0.05	0.0902774
-0.34	525	0.28	525	0.09	525	0.18	525	18.8799	525	0.0525	0.136466
-0.15	525	0.28	525	0.09	525	0.54	525	18.8899	525	0.19	0.146116
-0.7	525	0.52	525	0.18	525	0.78	525	18.8999	525	0.195	0.322632
-0.39	525	0.46	525	-0.69	525	0.77	525	18.9099	525	0.0375	0.344852
-0.14	525	0.59	525	-0.77	525	0.59	525	18.9199	525	0.0675	0.327932
-0.01	525	0.47	525	-0.78	525	0.46	525	18.9299	525	0.035	0.29384
-0.31	525	0.9	525	-0.77	525	0.73	525	18.94	525	0.1375	0.403761
-0.22	525	0.56	525	-0.81	525	0.44	525	18.95	525	-0.0075	0.317736
-0.08	525	0.52	525	-0.82	525	0.67	525	18.96	525	0.0725	0.338757
-0.39	525	1.16	525	-1.2	525	0.34	525	18.97	525	-0.0225	0.504255
-0.39	525	0.63	525	-1.03	525	-0.14	525	18.98	525	-0.2325	0.343181
-0.96	525	0.56	525	-0.44	525	0.32	525	18.99	525	-0.13	0.349237
-0.72	525	0.66	525	0.21	525	0.16	525	19.0001	525	0.0775	0.288628
-0.79	525	1.02	525	0.61	525	0.39	525	19.0101	525	0.3075	0.388424
-0.94	525	0.84	525	0.48	525	0.41	525	19.0201	525	0.1975	0.390691
-1.08	525	1.16	525	0.92	525	0.24	525	19.0301	525	0.31	0.502626
-1.12	525	0.61	525	1.3	525	0.29	525	19.0401	525	0.27	0.509002
-1.3	525	0.37	525	0.13	525	-0.1	525	19.0501	525	-0.225	0.370956
-1.09	525	0.43	525	-0.15	525	0.21	525	19.0602	525	-0.15	0.335361
-0.75	525	-0.4	525	-0.42	525	0.35	525	19.0702	525	-0.305	0.232612
-0.76	525	-0.17	525	-0.31	525	0.07	525	19.0802	525	-0.2925	0.174469
-0.29	525	0.51	525	-0.14	525	0.46	525	19.0902	525	0.135	0.204634
-0.29	525	0.2	525	0.82	525	0.19	525	19.1002	525	0.23	0.227486
-0.04	525	0.62	525	1.42	525	0.79	525	19.1102	525	0.6975	0.300066
0.12	525	0.89	525	1.18	525	0.67	525	19.1202	525	0.715	0.224147
-0.01	525	0.48	525	0.7	525	0.5	525	19.1303	525	0.4175	0.150907
-0.01	525	0.8	525	-0.01	525	0.4	525	19.1403	525	0.295	0.1941
0.71	525	0.87	525	0.03	525	0.24	525	19.1503	525	0.4625	0.196612
0.05	525	0.82	525	0.17	525	0.61	525	19.1603	525	0.4125	0.181493
0.14	525	0.87	525	0.7	525	0.08	525	19.1703	525	0.4475	0.1983
-0.11	525	0.44	525	0.9	525	0.5	525	19.1803	525	0.4325	0.207661
-0.48	525	0.78	525	1.05	525	0.39	525	19.1904	525	0.435	0.333729
-0.36	525	0.63	525	0.61	525	0.52	525	19.2004	525	0.35	0.237873
-0.18	525	0.98	525	0.6	525	0.24	525	19.2104	525	0.41	0.247992
0	525	0.73	525	0.56	525	0.33	525	19.2204	525	0.405	0.157929
-0.06	525	0.68	525	0.56	525	0.44	525	19.2304	525	0.405	0.162558
-0.07	525	0.45	525	-0.14	525	0.48	525	19.2404	525	0.18	0.165278
-0.52	525	0.68	525	-0.13	525	0.47	525	19.2505	525	0.125	0.275091
-0.33	525	0.26	525	0.54	525	0.56	525	19.2605	525	0.2575	0.20746
-0.12	525	0.74	525	0.83	525	0.58	525	19.2705	525	0.5075	0.21546
-0.4	525	0.65	525	0.34	525	0.07	525	19.2805	525	0.165	0.222505
-0.59	525	0.6	525	0.46	525	0.51	525	19.2905	525	0.245	0.279836
-0.65	525	0.54	525	0.65	525	0.59	525	19.3005	525	0.2825	0.311645
-0.38	525	0.18	525	0.38	525	0.8	525	19.3106	525	0.245	0.245136
-0.48	525	0.37	525	0.12	525	0.19	525	19.3206	525	0.05	0.184346
-0.27	525	0.41	525	0.08	525	0.54	525	19.3306	525	0.19	0.181338
-0.32	525	0.19	525	-0.37	525	0.47	525	19.3406	525	-0.0075	0.203321
-0.34	525	0.45	525	-0.65	525	0.39	525	19.3506	525	-0.0375	0.271888
-0.8	525	0.68	525	0.12	525	0.38	525	19.3606	525	0.095	0.319518
-0.8	525	0.72	525	0.56	525	0.39	525	19.3706	525	0.2175	0.345793
-0.37	525	0.7	525	0.11	525	0.63	525	19.3807	525	0.2675	0.249946
-0.57	525	0.24	525	0	525	0.69	525	19.3907	525	0.09	0.262393
-0.32	525	0.69	525	-0.64	525	0.79	525	19.4007	525	0.13	0.358771
-0.31	525	0.23	525	-0.41	525	0.87	525	19.4107	525	0.095	0.294095
-0.32	525	1.18	525	0.06	525	0.8	525	19.4207	525	0.43	0.341419
-0.44	525	0.22	525	0.68	525	0.63	525	19.4307	525	0.2725	0.258888
-0.03	525	0.06	525	0.69	525	0.56	525	19.4408	525	0.32	0.179025
-0.81	525	0.44	525	0.75	525	0.32	525	19.4508	525	0.175	0.3406
0.08	525	0.8	525	0.9	525	0.06	525	19.4608	525	0.46	0.226127
-0.46	525	0.89	525	1.13	525	-0.01	525	19.4708	525	0.3875	0.374174
-0.56	525	0.22	525	-0.15	525	-0.03	525	19.4808	525	-0.13	0.162737
-0.48	525	0.26	525	-0.93	525	0.19	525	19.4908	525	-0.24	0.284107
-0.77	525	0.45	525	-0.69	525	-0.26	525	19.5009	525	-0.3175	0.279266
-0.11	525	0.29	525	-0.15	525	-0.02	525	19.5109	525	0.0025	0.0996138
-0.67	525	0.11	525	0.38	525	-0.1	525	19.5209	525	-0.07	0.222823
-0.64	525	0.85	525	0.14	525	-0.18	525	19.5309	525	0.0425	0.313166
-0.69	525	0.75	525	-0.15	525	0.19	525	19.5409	525	0.025	0.302035
-0.61	525	0.95	525	0.29	525	-0.05	525	19.5509	525	0.145	0.326228
-0.98	525	0.98	525	0.84	525	-0.08	525	19.5609	525	0.19	0.455375
-0.48	525	0.95	525	1.16	525	0.17	525	19.571	525	0.45	0.376098
-0.81	525	1.04	525	1.41	525	-0.03	525	19.581	525	0.4025	0.506514
-0.71	525	0.81	525	1.02	525	-0.03	525	19.591	525	0.2725	0.39838
-0.89	525	0.73	525	0.4	525	0.02	525	19.601	525	0.065	0.349821
-0.55	525	1.33	525	0.34	525	0.38	525	19.611	525	0.375	0.383938
-0.45	525	0.75	525	0.44	525	0.74	525	19.621	525	0.37	0.282636
-0.36	525	0.83	525	0.45	525	0.6	525	19.6311	525	0.38	0.258747
-0.72	525	0.21	525	0.19	525	0.57	525	19.6411	525	0.0625	0.275057
-0.87	525	0.4	525	0.51	525	0.39	525	19.6511	525	0.1075	0.326965
-1.06	525	0.33	525	0.74	525	0.43	525	19.6611	525	0.11	0.399646
-1.09	525	0.6	525	0.04	525	0.13	525	19.6711	525	-0.08	0.358353
-1.16	525	0.44	525	-0.37	525	-0.45	525	19.6811	525	-0.385	0.327325
-1.5	525	0.97	525	-0.53	525	0.16	525	19.6912	525	-0.225	0.523999
-0.98	525	0.5	525	0.11	525	0.22	525	19.7012	525	-0.0375	0.324715
-0.66	525	0.76	525	0.63	525	0.43	525	19.7112	525	0.29	0.323857
-0.41	525	1	525	-0.13	525	0.13	525	19.7212	525	0.1475	0.304805
-0.57	525	0.96	525	-0.5	525	0.21	525	19.7312	525	0.025	0.358015
-0.6	525	0.83	525	0.02	525	0.43	525	19.7412	525	0.17	0.305314
-0.4	525	0.48	525	0.21	525	0.39	525	19.7512	525	0.17	0.198116
-0.08	525	0.61	525	0.75	525	0.37	525	19.7613	525	0.4125	0.181951
-0.77	525	0.62	525	1.4	525	0.36	525	19.7713	525	0.4025	0.448969
-0.44	525	0.83	525	1.66	525	0.27	525	19.7813	525	0.58	0.443978
-0.69	525	0.94	525	1.1	525	0.53	525	19.7913	525	0.47	0.404866
-0.51	525	1.12	525	0.89	525	0.73	525	19.8013	525	0.5575	0.364723
-0.4	525	0.73	525	0.94	525	0.82	525	19.8113	525	0.5225	0.310494
-0.69	525	0.4	525	0.99	525	0.76	525	19.8214	525	0.365	0.372033
-0.42	525	0.42	525	1.31	525	0.92	525	19.8314	525	0.5575	0.373282
-0.11	525	0.49	525	1.17	525	0.44	525	19.8414	525	0.4975	0.262151
-0.62	525	0.28	525	0.84	525	0.73	525	19.8514	525	0.3075	0.332049
-0.96	525	0.55	525	1.04	525	0.84	525	19.8614	525	0.3675	0.453787
-0.99	525	0.29	525	0.76	525	0.44	525	19.8714	525	0.125	0.384372
-0.75	525	0.73	525	0.66	525	0.4	525	19.8815	525	0.26	0.344069
-1.01	525	0.78	525	0.59	525	0.3	525	19.8915	525	0.165	0.403908
-0.86	525	0.68	525	0.43	525	0.03	525	19.9015	525	0.07	0.337664
-0.63	525	0.72	525	0.99	525	0.29	525	19.9115	525	0.3425	0.354762
-0.9	525	0.62	525	0.8	525	0.57	525	19.9215	525	0.2725	0.393941
-0.38	525	0.73	525	0.39	525	0.86	525	19.9315	525	0.4	0.278239
-0.43	525	0.99	525	0.05	525	0.2	525	19.9415	525	0.2025	0.294883
-0.49	525	0.63	525	-0.18	525	0.19	525	19.9516	525	0.0375	0.241501
-0.48	525	0.61	525	0.35	525	0.52	525	19.9616	525	0.25	0.249232
-0.3	525	0.45	525	0.49	525	0.45	525	19.9716	525	0.2725	0.191066
-0.58	525	0.77	525	0.6	525	0.59	525	19.9816	525	0.345	0.311087
-0.65	525	0.76	525	0.6	525	0.81	525	19.9916	525	0.38	0.346242
-0.64	525	0.63	525	0.96	525	0.72	525	20.0016	525	0.4175	0.359314
-0.77	525	0.47	525	1.13	525	0.75	525	20.0117	525	0.395	0.411208
-0.53	525	0.37	525	0.18	525	0.64	525	20.0217	525	0.165	0.25015
[truncated: 336 more rows]

## Sheet: ED Figure 9F
Title: 1 Date: 2020/07/15 19:24
Parameters: Exposure time: 10 ms Binning: 4x4
Bleaching correction function: exp. offset = -2274,99 * exp(--0,0003 * x) + 31897,95 R^2: 0,9540 Video duration: 30,99 s Framerate: 91,32
# Measurement	Time	F	F_bleach_correct	dF/F0	dF/F0_bleach_correct	Wavelength	Holding DF/F0	Info
0	0.011	29781.8	0	?	0	520	0	Calibration
1	0.0219	29883.2	0	?	0	520	0	Calibration
2	0.0329	29616.6	0	?	0	520	0	Calibration
3	0.0438	29720.8	0	?	0	520	0	Calibration
4	0.0548	29686.4	0	?	0	520	0	Calibration
5	0.0657	29678.8	0	?	0	520	0	Calibration
6	0.0767	29586.1	0	?	0	520	0	Calibration
7	0.0876	29658.1	0	?	0	520	0	Calibration
8	0.0986	29649.6	0	?	0	520	0	Calibration
9	0.1095	29647.9	0	?	0	520	0	Calibration
10	0.1205	29696.9	0	?	0	520	0	Calibration
11	0.1314	29762.8	0	?	0	520	0	Calibration
12	0.1424	29498.3	0	?	0	520	0	Calibration
13	0.1533	29590.4	0	?	0	520	0	Calibration
14	0.1643	29565.3	0	?	0	520	0	Calibration
15	0.1752	29444.8	0	?	0	520	0	Calibration
16	0.1862	29641	0	?	0	520	0	Calibration
17	0.1971	29556.9	0	?	0	520	0	Calibration
18	0.2081	29672	0	?	0	520	0	Calibration
19	0.219	29568.8	0	?	0	520	0	Calibration
20	0.23	29540.2	0	?	0	520	0	Calibration
21	0.2409	29655.8	0	?	0	520	0	Calibration
22	0.2519	29608.6	0	?	0	520	0	Calibration
23	0.2628	29588.9	0	?	0	520	0	Calibration
24	0.2738	29838.3	0	?	0	520	0	Calibration
25	0.2847	29583.2	0	?	0	520	0	Calibration
26	0.2957	29737.4	0	?	0	520	0	Calibration
27	0.3066	29681	0	?	0	520	0	Calibration
28	0.3176	29520.4	0	?	0	520	0	Calibration
29	0.3285	29601.7	0	?	0	520	0	Calibration
30	0.3395	29464.8	0	?	0	520	0	Calibration
31	0.3504	29588.5	0	?	0	520	0	Calibration
32	0.3614	29627.5	0	?	0	520	0	Calibration
33	0.3723	29645.7	0	?	0	520	0	Calibration
34	0.3833	29618.3	0	?	0	520	0	Calibration
35	0.3942	29521.9	0	?	0	520	0	Calibration
36	0.4052	29560.2	0	?	0	520	0	Calibration
37	0.4161	29650.1	0	?	0	520	0	Calibration
38	0.4271	29414.6	0	?	0	520	0	Calibration
39	0.438	29503.3	0	?	0	520	0	Calibration
40	0.449	29523.3	0	?	0	520	0	Calibration
41	0.4599	29477.4	0	?	0	520	0	Calibration
42	0.4709	29305.3	0	?	0	520	0	Calibration
43	0.4818	29555.9	0	?	0	520	0	Calibration
44	0.4928	29435	0	?	0	520	0	Calibration
45	0.5037	29608.8	0	?	0	520	0	Calibration
46	0.5147	29551.4	0	?	0	520	0	Calibration
47	0.5256	29663.9	0	?	0	520	0	Calibration
48	0.5366	29430.3	0	?	0	520	0	Calibration
49	0.5475	29500.4	0	?	0	520	0	Calibration
50	0.5585	29613.6	0	?	0	520	0	Calibration
51	0.5694	29515.8	0	?	0	520	0	Calibration
52	0.5804	29638.9	0	?	0	520	0	Calibration
53	0.5913	29543.2	0	?	0	520	0	Calibration
54	0.6023	29372.9	0	?	0	520	0	Calibration
55	0.6132	29430.2	0	?	0	520	0	Calibration
56	0.6242	29449.8	0	?	0	520	0	Calibration
57	0.6351	29460.8	0	?	0	520	0	Calibration
58	0.6461	29607	0	?	0	520	0	Calibration
59	0.657	29586.2	0	?	0	520	0	Calibration
60	0.668	29524.8	0	?	0	520	0	Calibration
61	0.6789	29398.9	0	?	0	520	0	Calibration
62	0.6899	29382.2	0	?	0	520	0	Calibration
63	0.7008	29351.4	0	?	0	520	0	Calibration
64	0.7118	29535.9	0	?	0	520	0	Calibration
65	0.7227	29424.9	0	?	0	520	0	Calibration
66	0.7337	29489.3	0	?	0	520	0	Calibration
67	0.7446	29460	0	?	0	520	0	Calibration
68	0.7556	29517.1	0	?	0	520	0	Calibration
69	0.7665	29560.4	0	?	0	520	0	Calibration
70	0.7775	29596	0	?	0	520	0	Calibration
71	0.7884	29621.6	0	?	0	520	0	Calibration
72	0.7994	29514.8	0	?	0	520	0	Calibration
73	0.8103	29531.6	0	?	0	520	0	Calibration
74	0.8213	29531.9	0	?	0	520	0	Calibration
75	0.8322	29661.3	0	?	0	520	0	Calibration
76	0.8432	29698.5	0	?	0	520	0	Calibration
77	0.8541	29403.4	0	?	0	520	0	Calibration
78	0.8651	29562.2	0	?	0	520	0	Calibration
79	0.876	29656.3	0	?	0	520	0	Calibration
80	0.887	29631.3	0	?	0	520	0	Calibration
81	0.8979	29697.6	0	?	0	520	0	Calibration
82	0.9089	29547.3	0	?	0	520	0	Calibration
83	0.9198	29571	0	?	0	520	0	Calibration
84	0.9308	29569.6	0	?	0	520	0	Calibration
85	0.9417	29590.6	0	?	0	520	0	Calibration
86	0.9527	29585.4	0	?	0	520	0	Calibration
87	0.9636	29674.5	0	?	0	520	0	Calibration
88	0.9746	29577.2	0	?	0	520	0	Calibration
89	0.9855	29591.3	0	?	0	520	0	Calibration
90	0.9965	29508.1	0	?	0	520	0	Calibration
91	1.0074	29635	0	?	0	520	0	Calibration
92	1.0184	29688.2	0	?	0	520	0	Calibration
93	1.0293	29533	0	?	0	520	0	Calibration
94	1.0403	29451.5	0	?	0	520	0	Calibration
95	1.0512	29446.6	0	?	0	520	0	Calibration
96	1.0622	29591.3	0	?	0	520	0	Calibration
97	1.0731	29578.5	0	?	0	520	0	Calibration
98	1.0841	29543.5	0	?	0	520	0	Calibration
99	1.095	29462.2	0	?	0	520	0	Calibration
100	1.106	29625.1	0	?	0	520	0	Calibration
101	1.1169	29640	0	?	0	520	0	Calibration
102	1.1279	29522.5	0	?	0	520	0	Calibration
103	1.1388	29545.4	0	?	0	520	0	Calibration
104	1.1498	29452.5	0	?	0	520	0	Calibration
105	1.1607	29584	0	?	0	520	0	Calibration
106	1.1717	29473.6	0	?	0	520	0	Calibration
107	1.1826	29575	0	?	0	520	0	Calibration
108	1.1936	29604.4	0	?	0	520	0	Calibration
109	1.2045	29747.5	0	?	0	520	0	Calibration
110	1.2155	29498.7	0	?	0	520	0	Calibration
111	1.2264	29589.4	0	?	0	520	0	Calibration
112	1.2374	29425.7	0	?	0	520	0	Calibration
113	1.2483	29441.6	0	?	0	520	0	Calibration
114	1.2593	29476.8	0	?	0	520	0	Calibration
115	1.2702	29585.2	0	?	0	520	0	Calibration
116	1.2812	29540.1	0	?	0	520	0	Calibration
117	1.2921	29543.2	0	?	0	520	0	Calibration
118	1.3031	29414.9	0	?	0	520	0	Calibration
119	1.314	29527.7	0	?	0	520	0	Calibration
120	1.325	29512.6	0	?	0	520	0	Calibration
121	1.3359	29540.8	0	?	0	520	0	Calibration
122	1.3469	29438.1	0	?	0	520	0	Calibration
123	1.3578	29429.2	0	?	0	520	0	Calibration
124	1.3688	29418.8	0	?	0	520	0	Calibration
125	1.3797	29447	0	?	0	520	0	Calibration
126	1.3907	29542.1	0	?	0	520	0	Calibration
127	1.4016	29547	0	?	0	520	0	Calibration
128	1.4126	29556.4	0	?	0	520	0	Calibration
129	1.4235	29587.2	0	?	0	520	0	Calibration
130	1.4345	29450.6	0	?	0	520	0	Calibration
131	1.4454	29429.7	0	?	0	520	0	Calibration
132	1.4564	29514.5	0	?	0	520	0	Calibration
133	1.4673	29601.9	0	?	0	520	0	Calibration
134	1.4783	29579.8	0	?	0	520	0	Calibration
135	1.4892	29398.9	0	?	0	520	0	Calibration
136	1.5002	29545.4	0	?	0	520	0	Calibration
137	1.5111	29440.6	0	?	0	520	0	Calibration
138	1.5221	29518.8	0	?	0	520	0	Calibration
139	1.533	29566.5	0	?	0	520	0	Calibration
140	1.544	29382.7	0	?	0	520	0	Calibration
141	1.5549	29340.6	0	?	0	520	0	Calibration
142	1.5659	29441.2	0	?	0	520	0	Calibration
143	1.5768	29415.2	0	?	0	520	0	Calibration
144	1.5878	29488.9	0	?	0	520	0	Calibration
145	1.5987	29623	0	?	0	520	0	Calibration
146	1.6097	29617.9	0	?	0	520	0	Calibration
147	1.6206	29424.6	0	?	0	520	0	Calibration
148	1.6316	29485.5	0	?	0	520	0	Calibration
149	1.6425	29426.8	0	?	0	520	0	Calibration
150	1.6535	29513.6	0	?	0	520	0	Calibration
151	1.6644	29428.4	0	?	0	520	0	Calibration
152	1.6754	29515.1	0	?	0	520	0	Calibration
153	1.6863	29679.8	0	?	0	520	0	Calibration
154	1.6973	29373.6	0	?	0	520	0	Calibration
155	1.7082	29626.2	0	?	0	520	0	Calibration
156	1.7192	29451.8	0	?	0	520	0	Calibration
157	1.7301	29504.8	0	?	0	520	0	Calibration
158	1.7411	29537.9	0	?	0	520	0	Calibration
159	1.752	29440.5	0	?	0	520	0	Calibration
160	1.763	29493.8	0	?	0	520	0	Calibration
161	1.7739	29404.9	0	?	0	520	0	Calibration
162	1.7849	29426.1	0	?	0	520	0	Calibration
163	1.7958	29469	0	?	0	520	0	Calibration
164	1.8068	29449.3	0	?	0	520	0	Calibration
165	1.8177	29608.6	0	?	0	520	0	Calibration
166	1.8287	29543.7	0	?	0	520	0	Calibration
167	1.8396	29504.7	0	?	0	520	0	Calibration
168	1.8506	29522.3	0	?	0	520	0	Calibration
169	1.8615	29590.8	0	?	0	520	0	Calibration
170	1.8725	29482.2	0	?	0	520	0	Calibration
171	1.8834	29427.2	0	?	0	520	0	Calibration
172	1.8944	29636.9	0	?	0	520	0	Calibration
173	1.9053	29355.1	0	?	0	520	0	Calibration
174	1.9163	29589.9	0	?	0	520	0	Calibration
175	1.9272	29449.6	0	?	0	520	0	Calibration
176	1.9382	29547.8	0	?	0	520	0	Calibration
177	1.9491	29436.7	0	?	0	520	0	Calibration
178	1.9601	29443.9	0	?	0	520	0	Calibration
179	1.971	29599.7	0	?	0	520	0	Calibration
180	1.982	29681.2	0	?	0	520	0	Calibration
181	1.9929	29504.5	0	?	0	520	0	Calibration
182	2.0039	29642.5	0	?	0	520	0	Calibration
183	2.0148	29452.7	0	?	0	520	0	Calibration
184	2.0258	29338.1	0	?	0	520	0	Calibration
185	2.0367	29447.7	0	?	0	520	0	Calibration
186	2.0477	29289.6	0	?	0	520	0	Calibration
187	2.0586	29454.5	0	?	0	520	0	Calibration
188	2.0696	29453	0	?	0	520	0	Calibration
189	2.0805	29358.1	0	?	0	520	0	Calibration
190	2.0915	29407.6	0	?	0	520	0	Calibration
191	2.1024	29561.8	0	?	0	520	0	Calibration
192	2.1134	29556.5	0	?	0	520	0	Calibration
193	2.1243	29443.3	0	?	0	520	0	Calibration
194	2.1353	29541.5	0	?	0	520	0	Calibration
195	2.1462	29494	0	?	0	520	0	Calibration
196	2.1572	29447.1	0	?	0	520	0	Calibration
197	2.1681	29602.8	0	?	0	520	0	Calibration
198	2.1791	29594.9	0	?	0	520	0	Calibration
199	2.19	29512.1	0	?	0	520	0	Calibration
200	2.201	29457.4	0	?	0	520	0	Calibration
201	2.2119	29444.7	0	?	0	520	0	Calibration
202	2.2229	29361.5	0	?	0	520	0	Calibration
203	2.2338	29433.5	0	?	0	520	0	Calibration
204	2.2448	29571.4	0	?	0	520	0	Calibration
205	2.2557	29451.9	0	?	0	520	0	Calibration
206	2.2667	29578.6	0	?	0	520	0	Calibration
207	2.2776	29438.9	0	?	0	520	0	Calibration
208	2.2886	29590.9	0	?	0	520	0	Calibration
209	2.2995	29418.9	0	?	0	520	0	Calibration
210	2.3105	29584.1	0	?	0	520	0	Calibration
211	2.3214	29642.8	0	?	0	520	0	Calibration
212	2.3324	29614.8	0	?	0	520	0	Calibration
213	2.3433	29450.5	0	?	0	520	0	Calibration
214	2.3543	29446.4	0	?	0	520	0	Calibration
215	2.3652	29470.9	0	?	0	520	0	Calibration
216	2.3762	29585.2	0	?	0	520	0	Calibration
217	2.3871	29581.3	0	?	0	520	0	Calibration
218	2.3981	29481.5	0	?	0	520	0	Calibration
219	2.409	29529	0	?	0	520	0	Calibration
220	2.42	29469.7	0	?	0	520	0	Calibration
221	2.4309	29510.5	0	?	0	520	0	Calibration
222	2.4419	29330.3	0	?	0	520	0	Calibration
223	2.4528	29493.2	0	?	0	520	0	Calibration
224	2.4638	29442.4	0	?	0	520	0	Calibration
225	2.4747	29331.6	0	?	0	520	0	Calibration
226	2.4857	29527.1	0	?	0	520	0	Calibration
227	2.4966	29433	0	?	0	520	0	Calibration
228	2.5076	29426.5	0	?	0	520	0	Calibration
229	2.5185	29489.5	0	?	0	520	0	Calibration
230	2.5295	29505.8	0	?	0	520	0	Calibration
231	2.5404	29362.6	0	?	0	520	0	Calibration
232	2.5514	29382.6	0	?	0	520	0	Calibration
233	2.5623	29614.2	0	?	0	520	0	Calibration
234	2.5733	29570.5	0	?	0	520	0	Calibration
235	2.5842	29367.8	0	?	0	520	0	Calibration
236	2.5952	29564.5	0	?	0	520	0	Calibration
237	2.6061	29472.2	0	?	0	520	0	Calibration
238	2.6171	29609.4	0	?	0	520	0	Calibration
239	2.628	29583.9	0	?	0	520	0	Calibration
240	2.639	29390	0	?	0	520	0	Calibration
241	2.6499	29519.6	0	?	0	520	0	Calibration
242	2.6609	29516.8	0	?	0	520	0	Calibration
243	2.6718	29454.1	0	?	0	520	0	Calibration
244	2.6828	29431.5	0	?	0	520	0	Calibration
245	2.6937	29535.4	0	?	0	520	0	Calibration
246	2.7047	29402.1	0	?	0	520	0	Calibration
247	2.7156	29295.7	0	?	0	520	0	Calibration
248	2.7266	29521	0	?	0	520	0	Calibration
249	2.7375	29456.4	0	?	0	520	0	Calibration
250	2.7485	29426.2	0	?	0	520	0	Calibration
251	2.7594	29425.6	0	?	0	520	0	Calibration
252	2.7704	29437.3	0	?	0	520	0	Calibration
253	2.7813	29516.2	0	?	0	520	0	Calibration
254	2.7923	29467.2	0	?	0	520	0	Calibration
255	2.8032	29416.5	0	?	0	520	0	Calibration
256	2.8142	29505.1	0	?	0	520	0	Calibration
257	2.8251	29521	0	?	0	520	0	Calibration
258	2.8361	29568.9	0	?	0	520	0	Calibration
259	2.847	29516.1	0	?	0	520	0	Calibration
260	2.858	29523.6	0	?	0	520	0	Calibration
261	2.8689	29481.9	0	?	0	520	0	Calibration
262	2.8799	29528	0	?	0	520	0	Calibration
263	2.8908	29596.6	0	?	0	520	0	Calibration
264	2.9018	29553	0	?	0	520	0	Calibration
265	2.9127	29502.2	0	?	0	520	0	Calibration
266	2.9237	29444.4	0	?	0	520	0	Calibration
267	2.9346	29523.8	0	?	0	520	0	Calibration
268	2.9456	29427.3	0	?	0	520	0	Calibration
269	2.9565	29384.3	0	?	0	520	0	Calibration
270	2.9675	29391.2	0	?	0	520	0	Calibration
271	2.9784	29525.8	0	?	0	520	0	Calibration
272	2.9894	29462.7	0	?	0	520	0	Calibration
273	3.0003	29614.8	0	?	0	520	0	Calibration
274	3.0113	29365.3	0	?	0	520	0	Calibration
275	3.0222	29451.3	0	?	0	520	0	Calibration
276	3.0332	29434.4	0	?	0	520	0	Calibration
277	3.0441	29550.9	0	?	0	520	0	Calibration
278	3.0551	29393.8	0	?	0	520	0	Calibration
279	3.066	29526.2	0	?	0	520	0	Calibration
280	3.077	29501.6	0	?	0	520	0	Calibration
281	3.0879	29421.6	0	?	0	520	0	Calibration
282	3.0989	29447.6	0	?	0	520	0	Calibration
283	3.1099	29390.3	0	?	0	520	0	Calibration
284	3.1208	29591.8	0	?	0	520	0	Calibration
285	3.1318	29348	0	?	0	520	0	Calibration
286	3.1427	29418.6	0	?	0	520	0	Calibration
287	3.1537	29429	0	?	0	520	0	Calibration
288	3.1646	29487.4	0	?	0	520	0	Calibration
289	3.1756	29497.3	0	?	0	520	0	Calibration
290	3.1865	29376.9	0	?	0	520	0	Calibration
291	3.1975	29286.2	0	?	0	520	0	Calibration
292	3.2084	29444.5	0	?	0	520	0	Calibration
293	3.2194	29413.8	0	?	0	520	0	Calibration
294	3.2303	29333	0	?	0	520	0	Calibration
295	3.2413	29438.9	0	?	0	520	0	Calibration
296	3.2522	29485.8	0	?	0	520	0	Calibration
297	3.2632	29513	0	?	0	520	0	Calibration
298	3.2741	29546.1	0	?	0	520	0	Calibration
299	3.2851	29396.8	0	?	0	520	0	Calibration
300	3.296	29467.7	0	?	0	520	0	Calibration
301	3.307	29403.2	0	?	0	520	0	Calibration
302	3.3179	29392.4	0	?	0	520	0	Calibration
303	3.3289	29300.8	0	?	0	520	0	Calibration
304	3.3398	29329.6	0	?	0	520	0	Calibration
305	3.3508	29350.6	0	?	0	520	0	Calibration
306	3.3617	29326.2	0	?	0	520	0	Calibration
307	3.3727	29420.7	0	?	0	520	0	Calibration
308	3.3836	29451.3	0	?	0	520	0	Calibration
309	3.3946	29472.8	0	?	0	520	0	Calibration
310	3.4055	29307.9	0	?	0	520	0	Calibration
311	3.4165	29476.2	0	?	0	520	0	Calibration
312	3.4274	29308.2	0	?	0	520	0	Calibration
313	3.4384	29428.4	0	?	0	520	0	Calibration
314	3.4493	29447.1	0	?	0	520	0	Calibration
315	3.4603	29543.3	0	?	0	520	0	Calibration
316	3.4712	29406.9	0	?	0	520	0	Calibration
317	3.4822	29483.1	0	?	0	520	0	Calibration
318	3.4931	29495.6	0	?	0	520	0	Calibration
319	3.5041	29470.7	0	?	0	520	0	Calibration
320	3.515	29309.4	0	?	0	520	0	Calibration
321	3.526	29439.7	0	?	0	520	0	Calibration
322	3.5369	29399.1	0	?	0	520	0	Calibration
323	3.5479	29242.8	0	?	0	520	0	Calibration
324	3.5588	29218.6	0	?	0	520	0	Calibration
325	3.5698	29277.9	0	?	0	520	0	Calibration
326	3.5807	29498.8	0	?	0	520	0	Calibration
327	3.5917	29344.5	0	?	0	520	0	Calibration
328	3.6026	29490.5	0	?	0	520	0	Calibration
329	3.6136	29338.9	0	?	0	520	0	Calibration
330	3.6245	29454.4	0	?	0	520	0	Calibration
331	3.6355	29191.6	0	?	0	520	0	Calibration
332	3.6464	29440.8	0	?	0	520	0	Calibration
333	3.6574	29405.5	0	?	0	520	0	Calibration
334	3.6683	29507.4	0	?	0	520	0	Calibration
335	3.6793	29548.9	0	?	0	520	0	Calibration
336	3.6902	29288.8	0	?	0	520	0	Calibration
337	3.7012	29318.3	0	?	0	520	0	Calibration
338	3.7121	29470.4	0	?	0	520	0	Calibration
339	3.7231	29415.7	0	?	0	520	0	Calibration
340	3.734	29444.7	0	?	0	520	0	Calibration
341	3.745	29517.1	0	?	0	520	0	Calibration
342	3.7559	29468.5	0	?	0	520	0	Calibration
343	3.7669	29288.5	0	?	0	520	0	Calibration
344	3.7778	29425.1	0	?	0	520	0	Calibration
345	3.7888	29495.8	0	?	0	520	0	Calibration
346	3.7997	29489.6	0	?	0	520	0	Calibration
347	3.8107	29516.4	0	?	0	520	0	Calibration
348	3.8216	29256.5	0	?	0	520	0	Calibration
349	3.8326	29571.9	0	?	0	520	0	Calibration
350	3.8435	29475.3	0	?	0	520	0	Calibration
351	3.8545	29604.5	0	?	0	520	0	Calibration
352	3.8654	29284.9	0	?	0	520	0	Calibration
353	3.8764	29512.5	0	?	0	520	0	Calibration
354	3.8873	29463.4	0	?	0	520	0	Calibration
355	3.8983	29445.9	0	?	0	520	0	Calibration
356	3.9092	29461.5	0	?	0	520	0	Calibration
357	3.9202	29347.4	0	?	0	520	0	Calibration
358	3.9311	29417.7	0	?	0	520	0	Calibration
359	3.9421	29398.8	0	?	0	520	0	Calibration
360	3.953	29259.7	0	?	0	520	0	Calibration
361	3.964	29413.5	0	?	0	520	0	Calibration
362	3.9749	29310.7	0	?	0	520	0	Calibration
363	3.9859	29390.1	0	?	0	520	0	Calibration
364	3.9968	29438.9	0	?	0	520	0	Calibration
365	4.0078	29298.6	0	?	0	520	0	Calibration
366	4.0187	29474.9	0	?	0	520	0	Calibration
367	4.0297	29397.9	0	?	0	520	0	Calibration
368	4.0406	29289.4	0	?	0	520	0	Calibration
369	4.0516	29563.1	0	?	0	520	0	Calibration
370	4.0625	29324.3	0	?	0	520	0	Calibration
371	4.0735	29421.5	0	?	0	520	0	Calibration
372	4.0844	29550.9	0	?	0	520	0	Calibration
373	4.0954	29433.7	0	?	0	520	0	Calibration
374	4.1063	29473.7	0	?	0	520	0	Calibration
375	4.1173	29190.6	0	?	0	520	0	Calibration
376	4.1282	29296.1	0	?	0	520	0	Calibration
377	4.1392	29283.1	0	?	0	520	0	Calibration
378	4.1501	29443	0	?	0	520	0	Calibration
379	4.1611	29344.9	0	?	0	520	0	Calibration
380	4.172	29495.8	0	?	0	520	0	Calibration
381	4.183	29459	0	?	0	520	0	Calibration
382	4.1939	29298.4	0	?	0	520	0	Calibration
383	4.2049	29283.5	0	?	0	520	0	Calibration
384	4.2158	29557.9	0	?	0	520	0	Calibration
385	4.2268	29317.1	0	?	0	520	0	Calibration
386	4.2377	29481.5	0	?	0	520	0	Calibration
387	4.2487	29319.4	0	?	0	520	0	Calibration
388	4.2596	29382.2	0	?	0	520	0	Calibration
389	4.2706	29466.2	0	?	0	520	0	Calibration
390	4.2815	29432.6	0	?	0	520	0	Calibration
391	4.2925	29462.9	0	?	0	520	0	Calibration
392	4.3034	29448.4	0	?	0	520	0	Calibration
393	4.3144	29448.9	0	?	0	520	0	Calibration
394	4.3253	29415	0	?	0	520	0	Calibration
395	4.3363	29375.8	0	?	0	520	0	Calibration
396	4.3472	29528	0	?	0	520	0	Calibration
397	4.3582	29441.8	0	?	0	520	0	Calibration
398	4.3691	29470.7	0	?	0	520	0	Calibration
399	4.3801	29516.1	0	?	0	520	0	Calibration
400	4.391	29431	0	?	0	520	0	Calibration
401	4.402	29250.6	0	?	0	520	0	Calibration
402	4.4129	29344.4	0	?	0	520	0	Calibration
403	4.4239	29326.7	0	?	0	520	0	Calibration
404	4.4348	29259	0	?	0	520	0	Calibration
405	4.4458	29495.3	0	?	0	520	0	Calibration
406	4.4567	29405.6	0	?	0	520	0	Calibration
407	4.4677	29305	0	?	0	520	0	Calibration
408	4.4786	29333	0	?	0	520	0	Calibration
409	4.4896	29430.2	0	?	0	520	0	Calibration
410	4.5005	29418	0	?	0	520	0	Calibration
411	4.5115	29376.4	0	?	0	520	0	Calibration
412	4.5224	29186.5	0	?	0	520	0	Calibration
413	4.5334	29340.5	0	?	0	520	0	Calibration
414	4.5443	29316.6	0	?	0	520	0	Calibration
415	4.5553	29425.6	0	?	0	520	0	Calibration
416	4.5662	29479	0	?	0	520	0	Calibration
417	4.5772	29426.4	0	?	0	520	0	Calibration
418	4.5881	29517.3	0	?	0	520	0	Calibration
419	4.5991	29425	0	?	0	520	0	Calibration
420	4.61	29323.7	0	?	0	520	0	Calibration
421	4.621	29258.5	0	?	0	520	0	Calibration
422	4.6319	29447.4	0	?	0	520	0	Calibration
423	4.6429	29388.2	0	?	0	520	0	Calibration
424	4.6538	29391	0	?	0	520	0	Calibration
425	4.6648	29341.1	0	?	0	520	0	Calibration
426	4.6757	29483.8	0	?	0	520	0	Calibration
427	4.6867	29382.9	0	?	0	520	0	Calibration
428	4.6976	29503.8	0	?	0	520	0	Calibration
429	4.7086	29472.1	0	?	0	520	0	Calibration
430	4.7195	29466.4	0	?	0	520	0	Calibration
431	4.7305	29304.3	0	?	0	520	0	Calibration
432	4.7414	29570.7	0	?	0	520	0	Calibration
433	4.7524	29460.2	0	?	0	520	0	Calibration
434	4.7633	29252.9	0	?	0	520	0	Calibration
435	4.7743	29356.8	0	?	0	520	0	Calibration
436	4.7852	29416.9	0	?	0	520	0	Calibration
437	4.7962	29449.4	0	?	0	520	0	Calibration
438	4.8071	29443	0	?	0	520	0	Calibration
439	4.8181	29333.5	0	?	0	520	0	Calibration
440	4.829	29501.8	0	?	0	520	0	Calibration
441	4.84	29417.3	0	?	0	520	0	Calibration
442	4.8509	29356.4	0	?	0	520	0	Calibration
443	4.8619	29379.2	0	?	0	520	0	Calibration
444	4.8728	29212.3	0	?	0	520	0	Calibration
445	4.8838	29537.9	0	?	0	520	0	Calibration
446	4.8947	29419.8	0	?	0	520	0	Calibration
447	4.9057	29250.1	0	?	0	520	0	Calibration
448	4.9166	29417.6	0	?	0	520	0	Calibration
449	4.9276	29358.2	0	?	0	520	0	Calibration
450	4.9385	29295.2	0	?	0	520	0	Calibration
451	4.9495	29466.2	0	?	0	520	0	Calibration
452	4.9604	29478.2	0	?	0	520	0	Calibration
453	4.9714	29351	0	?	0	520	0	Calibration
454	4.9823	29164.6	0	?	0	520	0	Calibration
455	4.9933	29434.4	0	?	0	520	0	Calibration
456	5.0042	29414.1	0	?	0	520	0	Calibration
457	5.0152	29353	0	?	0	520	0	Calibration
458	5.0261	29335.2	0	?	0	520	0	Calibration
459	5.0371	29345	0	?	0	520	0	Calibration
460	5.048	29268	0	?	0	520	0	Calibration
461	5.059	29291	0	?	0	520	0	Calibration
462	5.0699	29328.3	0	?	0	520	0	Calibration
463	5.0809	29326.7	0	?	0	520	0	Calibration
464	5.0918	29448.1	0	?	0	520	0	Calibration
465	5.1028	29279	0	?	0	520	0	Calibration
466	5.1137	29531.4	0	?	0	520	0	Calibration
467	5.1247	29390.7	0	?	0	520	0	Calibration
468	5.1356	29459.8	0	?	0	520	0	Calibration
469	5.1466	29435.4	0	?	0	520	0	Calibration
470	5.1575	29429.5	0	?	0	520	0	Calibration
471	5.1685	29261.8	0	?	0	520	0	Calibration
472	5.1794	29422.3	0	?	0	520	0	Calibration
473	5.1904	29209.6	0	?	0	520	0	Calibration
474	5.2013	29445.6	0	?	0	520	0	Calibration
475	5.2123	29288.9	0	?	0	520	0	Calibration
476	5.2232	29393.4	0	?	0	520	0	Calibration
477	5.2342	29349.1	0	?	0	520	0	Calibration
478	5.2451	29297.3	0	?	0	520	0	Calibration
479	5.2561	29376.8	0	?	0	520	0	Calibration
480	5.267	29455.4	0	?	0	520	0	Calibration
481	5.278	29472.2	0	?	0	520	0	Calibration
482	5.2889	29383.8	0	?	0	520	0	Calibration
483	5.2999	29322.2	0	?	0	520	0	Calibration
484	5.3108	29314.9	0	?	0	520	0	Calibration
485	5.3218	29278.5	0	?	0	520	0	Calibration
486	5.3327	29353.6	0	?	0	520	0	Calibration
487	5.3437	29365.1	0	?	0	520	0	Calibration
488	5.3546	29402.7	0	?	0	520	0	Calibration
489	5.3656	29331.9	0	?	0	520	0	Calibration
490	5.3765	29256.4	0	?	0	520	0	Calibration
491	5.3875	29459.4	0	?	0	520	0	Calibration
492	5.3984	29314.6	0	?	0	520	0	Calibration
493	5.4094	29513.2	0	?	0	520	0	Calibration
494	5.4203	29392.7	0	?	0	520	0	Calibration
495	5.4313	29322.6	0	?	0	520	0	Calibration
496	5.4422	29398.3	0	?	0	520	0	Calibration
497	5.4532	29394.5	0	?	0	520	0	Calibration
498	5.4641	29386.3	0	?	0	520	0	Calibration
499	5.4751	29409	0	?	0	520	0	Calibration
500	5.486	29262.1	0	?	0	520	0	Calibration
501	5.497	29377.3	0	?	0	520	0	Calibration
502	5.5079	29267.3	0	?	0	520	0	Calibration
503	5.5189	29374.1	0	?	0	520	0	Calibration
504	5.5298	29293.4	0	?	0	520	0	Calibration
505	5.5408	29352.6	0	?	0	520	0	Calibration
506	5.5517	29253.5	0	?	0	520	0	Calibration
507	5.5627	29199.9	0	?	0	520	0	Calibration
508	5.5736	29327.6	0	?	0	520	0	Calibration
509	5.5846	29275.4	0	?	0	520	0	Calibration
510	5.5955	29371.9	0	?	0	520	0	Calibration
511	5.6065	29383.5	0	?	0	520	0	Calibration
512	5.6174	29162.7	0	?	0	520	0	Calibration
513	5.6284	29331.2	0	?	0	520	0	Calibration
514	5.6393	29271.5	0	?	0	520	0	Calibration
515	5.6503	29236	0	?	0	520	0	Calibration
516	5.6612	29373.5	0	?	0	520	0	Calibration
517	5.6722	29213.7	0	?	0	520	0	Calibration
518	5.6831	29499.5	0	?	0	520	0	Calibration
519	5.6941	29286	0	?	0	520	0	Calibration
520	5.705	29345.4	0	?	0	520	0	Calibration
521	5.716	29347.4	0	?	0	520	0	Calibration
522	5.7269	29326.3	0	?	0	520	0	Calibration
523	5.7379	29451.9	0	?	0	520	0	Calibration
524	5.7488	29240.8	0	?	0	520	0	Calibration
525	5.7598	29418.3	0	?	0	520	0	Calibration
526	5.7707	29351.3	0	?	0	520	0	Calibration
527	5.7817	29387.2	0	?	0	520	0	Calibration
528	5.7926	29424.8	0	?	0	520	0	Calibration
529	5.8036	29327	0	?	0	520	0	Calibration
530	5.8145	29343.2	0	?	0	520	0	Calibration
531	5.8255	29315.8	0	?	0	520	0	Calibration
532	5.8364	29477.5	0	?	0	520	0	Calibration
533	5.8474	29372	0	?	0	520	0	Calibration
534	5.8583	29292.6	0	?	0	520	0	Calibration
535	5.8693	29429.3	0	?	0	520	0	Calibration
536	5.8802	29368.5	0	?	0	520	0	Calibration
537	5.8912	29302.5	0	?	0	520	0	Calibration
538	5.9021	29369.5	0	?	0	520	0	Calibration
539	5.9131	29280.2	0	?	0	520	0	Calibration
540	5.924	29307.4	0	?	0	520	0	Calibration
541	5.935	29271.2	0	?	0	520	0	Calibration
542	5.9459	29291.8	0	?	0	520	0	Calibration
543	5.9569	29256.6	0	?	0	520	0	Calibration
544	5.9678	29480	0	?	0	520	0	Calibration
545	5.9788	29442.1	0	?	0	520	0	Calibration
546	5.9897	29382.8	0	?	0	520	0	Calibration
547	6.0007	29330	0	?	0	520	0	Calibration
548	6.0116	29376.3	0	?	0	520	0	Calibration
549	6.0226	29273	0	?	0	520	0	Calibration
550	6.0335	29296.9	0	?	0	520	0	Calibration
551	6.0445	29329.5	0	?	0	520	0	Calibration
552	6.0554	29243.2	0	?	0	520	0	Calibration
553	6.0664	29212.4	0	?	0	520	0	Calibration
554	6.0773	29318.4	0	?	0	520	0	Calibration
555	6.0883	29241.5	0	?	0	520	0	Calibration
556	6.0992	29361.4	0	?	0	520	0	Calibration
557	6.1102	29368.7	0	?	0	520	0	Calibration
558	6.1211	29345.3	0	?	0	520	0	Calibration
559	6.1321	29322.4	0	?	0	520	0	Calibration
560	6.143	29332.5	0	?	0	520	0	Calibration
561	6.154	29313.5	0	?	0	520	0	Calibration
562	6.1649	29399	0	?	0	520	0	Calibration
563	6.1759	29239.2	0	?	0	520	0	Calibration
564	6.1868	29291.7	0	?	0	520	0	Calibration
565	6.1978	29060.9	0	?	0	520	0	Calibration
566	6.2088	29334.2	0	?	0	520	0	Calibration
567	6.2197	29398.5	0	?	0	520	0	Calibration
568	6.2307	29366.7	0	?	0	520	0	Calibration
569	6.2416	29262.5	0	?	0	520	0	Calibration
570	6.2526	29326.6	0	?	0	520	0	Calibration
571	6.2635	29167.1	0	?	0	520	0	Calibration
572	6.2745	29283.8	0	?	0	520	0	Calibration
573	6.2854	29231.2	0	?	0	520	0	Calibration
574	6.2964	29232.1	0	?	0	520	0	Calibration
575	6.3073	29206.5	0	?	0	520	0	Calibration
576	6.3183	29143.4	0	?	0	520	0	Calibration
577	6.3292	29228.1	0	?	0	520	0	Calibration
578	6.3402	29265.9	0	?	0	520	0	Calibration
579	6.3511	29192.6	0	?	0	520	0	Calibration
580	6.3621	29268.6	0	?	0	520	0	Calibration
581	6.373	29224.9	0	?	0	520	0	Calibration
582	6.384	29231	0	?	0	520	0	Calibration
583	6.3949	29254.3	0	?	0	520	0	Calibration
584	6.4059	29247.8	0	?	0	520	0	Calibration
585	6.4168	29279.7	0	?	0	520	0	Calibration
586	6.4278	29231.5	0	?	0	520	0	Calibration
587	6.4387	29262.5	0	?	0	520	0	Calibration
588	6.4497	29369.7	0	?	0	520	0	Calibration
589	6.4606	29201.6	0	?	0	520	0	Calibration
590	6.4716	29180.3	0	?	0	520	0	Calibration
591	6.4825	29166.4	0	?	0	520	0	Calibration
592	6.4935	29326.5	0	?	0	520	0	Calibration
593	6.5044	29256.5	0	?	0	520	0	Calibration
594	6.5154	29200.7	0	?	0	520	0	Calibration
595	6.5263	29134.1	0	?	0	520	0	Calibration
596	6.5373	29244.8	0	?	0	520	0	Calibration
597	6.5482	29310.5	0	?	0	520	0	Calibration
598	6.5592	29143	0	?	0	520	0	Calibration
599	6.5701	29158.7	0	?	0	520	0	Calibration
600	6.5811	29219.6	0	?	0	520	0	Calibration
601	6.592	29321.8	0	?	0	520	0	Calibration
602	6.603	29326.2	0	?	0	520	0	Calibration
603	6.6139	29075	0	?	0	520	0	Calibration
604	6.6249	29177.7	0	?	0	520	0	Calibration
605	6.6358	29199.6	0	?	0	520	0	Calibration
606	6.6468	29365	0	?	0	520	0	Calibration
607	6.6577	29289.7	0	?	0	520	0	Calibration
608	6.6687	29245	0	?	0	520	0	Calibration
609	6.6796	29229.6	0	?	0	520	0	Calibration
610	6.6906	29245.4	0	?	0	520	0	Calibration
611	6.7015	29277.6	0	?	0	520	0	Calibration
612	6.7125	29311	0	?	0	520	0	Calibration
613	6.7234	29325.7	0	?	0	520	0	Calibration
614	6.7344	29242.8	0	?	0	520	0	Calibration
615	6.7453	29360.4	0	?	0	520	0	Calibration
616	6.7563	29119	0	?	0	520	0	Calibration
617	6.7672	29187.4	0	?	0	520	0	Calibration
618	6.7782	29368.5	0	?	0	520	0	Calibration
619	6.7891	29293.5	0	?	0	520	0	Calibration
620	6.8001	29324.7	0	?	0	520	0	Calibration
621	6.811	29109.8	0	?	0	520	0	Calibration
622	6.822	29209.4	0	?	0	520	0	Calibration
623	6.8329	29129.9	0	?	0	520	0	Calibration
624	6.8439	29276.6	0	?	0	520	0	Calibration
625	6.8548	29246.6	0	?	0	520	0	Calibration
626	6.8658	29384.5	0	?	0	520	0	Calibration
627	6.8767	29138.7	0	?	0	520	0	Calibration
628	6.8877	29235.2	0	?	0	520	0	Calibration
629	6.8986	29254.9	0	?	0	520	0	Calibration
630	6.9096	29284	0	?	0	520	0	Calibration
631	6.9205	29258	0	?	0	520	0	Calibration
632	6.9315	29225.2	0	?	0	520	0	Calibration
633	6.9424	29368.5	0	?	0	520	0	Calibration
634	6.9534	29269.7	0	?	0	520	0	Calibration
635	6.9643	29268.5	0	?	0	520	0	Calibration
636	6.9753	29102.1	0	?	0	520	0	Calibration
637	6.9862	29265.9	0	?	0	520	0	Calibration
638	6.9972	29224.2	0	?	0	520	0	Calibration
639	7.0081	29186	0	?	0	520	0	Calibration
640	7.0191	29266.8	0	?	0	520	0	Calibration
641	7.03	29257.4	0	?	0	520	0	Calibration
642	7.041	29210	0	?	0	520	0	Calibration
643	7.0519	29166.4	0	?	0	520	0	Calibration
644	7.0629	29211.6	0	?	0	520	0	Calibration
645	7.0738	29198.9	0	?	0	520	0	Calibration
646	7.0848	29213.8	0	?	0	520	0	Calibration
647	7.0957	29280.3	0	?	0	520	0	Calibration
648	7.1067	29209.4	0	?	0	520	0	Calibration
649	7.1176	29375.5	0	?	0	520	0	Calibration
650	7.1286	29300.1	0	?	0	520	0	Calibration
651	7.1395	29327.6	0	?	0	520	0	Calibration
652	7.1505	29143.3	0	?	0	520	0	Calibration
653	7.1614	29165.6	0	?	0	520	0	Calibration
654	7.1724	28989.6	0	?	0	520	0	Calibration
655	7.1833	29254.9	0	?	0	520	0	Calibration
656	7.1943	29350	0	?	0	520	0	Calibration
657	7.2052	29278.5	0	?	0	520	0	Calibration
658	7.2162	29227.2	0	?	0	520	0	Calibration
659	7.2271	29348.2	0	?	0	520	0	Calibration
660	7.2381	29321.9	0	?	0	520	0	Calibration
661	7.249	29278.4	0	?	0	520	0	Calibration
662	7.26	29175.9	0	?	0	520	0	Calibration
663	7.2709	29108	0	?	0	520	0	Calibration
664	7.2819	29242.2	0	?	0	520	0	Calibration
665	7.2928	29115.1	0	?	0	520	0	Calibration
666	7.3038	29311.5	0	?	0	520	0	Calibration
667	7.3147	29310.5	0	?	0	520	0	Calibration
668	7.3257	29127	0	?	0	520	0	Calibration
669	7.3366	29274	0	?	0	520	0	Calibration
670	7.3476	29259	0	?	0	520	0	Calibration
671	7.3585	29178	0	?	0	520	0	Calibration
672	7.3695	29067	0	?	0	520	0	Calibration
673	7.3804	29113.5	0	?	0	520	0	Calibration
674	7.3914	29147.7	0	?	0	520	0	Calibration
675	7.4023	29384.6	0	?	0	520	0	Calibration
676	7.4133	29209.8	0	?	0	520	0	Calibration
677	7.4242	29206.1	0	?	0	520	0	Calibration
678	7.4352	29274.9	0	?	0	520	0	Calibration
679	7.4461	29198.2	0	?	0	520	0	Calibration
680	7.4571	29086.8	0	?	0	520	0	Calibration
681	7.468	29315.8	0	?	0	520	0	Calibration
682	7.479	29200.1	0	?	0	520	0	Calibration
683	7.4899	29205.4	0	?	0	520	0	Calibration
684	7.5009	29170.5	0	?	0	520	0	Calibration
685	7.5118	29114.6	0	?	0	520	0	Calibration
686	7.5228	29299.7	0	?	0	520	0	Calibration
687	7.5337	29062.5	0	?	0	520	0	Calibration
688	7.5447	29143.9	0	?	0	520	0	Calibration
689	7.5556	29111.9	0	?	0	520	0	Calibration
690	7.5666	29228.6	0	?	0	520	0	Calibration
691	7.5775	29197.7	0	?	0	520	0	Calibration
692	7.5885	29251.9	0	?	0	520	0	Calibration
693	7.5994	29310.9	0	?	0	520	0	Calibration
694	7.6104	28889.2	0	?	0	520	0	Calibration
695	7.6213	29249.3	0	?	0	520	0	Calibration
696	7.6323	29240	0	?	0	520	0	Calibration
697	7.6432	29196.3	0	?	0	520	0	Calibration
698	7.6542	29149.3	0	?	0	520	0	Calibration
699	7.6651	29330.5	0	?	0	520	0	Calibration
700	7.6761	29199.7	0	?	0	520	0	Calibration
701	7.687	29082.7	0	?	0	520	0	Calibration
702	7.698	29284.2	0	?	0	520	0	Calibration
703	7.7089	29354	0	?	0	520	0	Calibration
704	7.7199	29023.2	0	?	0	520	0	Calibration
705	7.7308	29171.2	0	?	0	520	0	Calibration
706	7.7418	29165	0	?	0	520	0	Calibration
707	7.7527	29124	0	?	0	520	0	Calibration
708	7.7637	29059	0	?	0	520	0	Calibration
709	7.7746	29227.4	0	?	0	520	0	Calibration
710	7.7856	29105.1	0	?	0	520	0	Calibration
711	7.7965	29163.1	0	?	0	520	0	Calibration
712	7.8075	29251.7	0	?	0	520	0	Calibration
713	7.8184	29081.3	0	?	0	520	0	Calibration
714	7.8294	29272.9	0	?	0	520	0	Calibration
715	7.8403	29168.5	0	?	0	520	0	Calibration
716	7.8513	29178.4	0	?	0	520	0	Calibration
717	7.8622	29000.2	0	?	0	520	0	Calibration
718	7.8732	29252.2	0	?	0	520	0	Calibration
719	7.8841	29157.7	0	?	0	520	0	Calibration
720	7.8951	29052.9	0	?	0	520	0	Calibration
721	7.906	29231.4	0	?	0	520	0	Calibration
722	7.917	29044.1	0	?	0	520	0	Calibration
723	7.9279	29148.1	0	?	0	520	0	Calibration
724	7.9389	29016.3	0	?	0	520	0	Calibration
725	7.9498	29328.3	0	?	0	520	0	Calibration
726	7.9608	29191.1	0	?	0	520	0	Calibration
727	7.9717	29259.5	0	?	0	520	0	Calibration
728	7.9827	29320.1	0	?	0	520	0	Calibration
729	7.9936	29142	0	?	0	520	0	Calibration
730	8.0046	29148.2	0	?	0	520	0	Calibration
731	8.0155	29213	0	?	0	520	0	Calibration
732	8.0265	29240.6	0	?	0	520	0	Calibration
733	8.0374	29046.2	0	?	0	520	0	Calibration
734	8.0484	29151.1	0	?	0	520	0	Calibration
735	8.0593	29114.6	0	?	0	520	0	Calibration
736	8.0703	29277.1	0	?	0	520	0	Calibration
737	8.0812	29101.6	0	?	0	520	0	Calibration
738	8.0922	29094.9	0	?	0	520	0	Calibration
739	8.1031	29190.7	0	?	0	520	0	Calibration
740	8.1141	29179.5	0	?	0	520	0	Calibration
741	8.125	29154.7	0	?	0	520	0	Calibration
742	8.136	29114	0	?	0	520	0	Calibration
743	8.1469	29187.9	0	?	0	520	0	Calibration
744	8.1579	29241.8	0	?	0	520	0	Calibration
745	8.1688	29225.5	0	?	0	520	0	Calibration
746	8.1798	29185.4	0	?	0	520	0	Calibration
747	8.1907	29272.3	0	?	0	520	0	Calibration
748	8.2017	29107.6	0	?	0	520	0	Calibration
749	8.2126	29087.7	0	?	0	520	0	Calibration
750	8.2236	29046.5	0	?	0	520	0	Calibration
751	8.2345	29124.2	0	?	0	520	0	Calibration
752	8.2455	29185.9	0	?	0	520	0	Calibration
753	8.2564	29146.8	0	?	0	520	0	Calibration
754	8.2674	29106.4	0	?	0	520	0	Calibration
755	8.2783	29108.4	0	?	0	520	0	Calibration
756	8.2893	29138.9	0	?	0	520	0	Calibration
757	8.3002	29036.5	0	?	0	520	0	Calibration
758	8.3112	28999.5	0	?	0	520	0	Calibration
759	8.3221	29044.3	0	?	0	520	0	Calibration
760	8.3331	29070.5	0	?	0	520	0	Calibration
761	8.344	29138.8	0	?	0	520	0	Calibration
762	8.355	29015.8	0	?	0	520	0	Calibration
763	8.3659	29149.4	0	?	0	520	0	Calibration
764	8.3769	29133.1	0	?	0	520	0	Calibration
765	8.3878	29158	0	?	0	520	0	Calibration
766	8.3988	29067	0	?	0	520	0	Calibration
767	8.4097	29286.5	0	?	0	520	0	Calibration
768	8.4207	29059.1	0	?	0	520	0	Calibration
769	8.4316	29062.2	0	?	0	520	0	Calibration
770	8.4426	29079	0	?	0	520	0	Calibration
771	8.4535	29141.1	0	?	0	520	0	Calibration
772	8.4645	29111.4	0	?	0	520	0	Calibration
773	8.4754	29210.8	0	?	0	520	0	Calibration
774	8.4864	29097.1	0	?	0	520	0	Calibration
775	8.4973	29170	0	?	0	520	0	Calibration
776	8.5083	29074.4	0	?	0	520	0	Calibration
777	8.5192	29154.9	0	?	0	520	0	Calibration
778	8.5302	29072.6	0	?	0	520	0	Calibration
779	8.5411	29079.6	0	?	0	520	0	Calibration
780	8.5521	29179.2	0	?	0	520	0	Calibration
781	8.563	29236.1	0	?	0	520	0	Calibration
782	8.574	29065.9	0	?	0	520	0	Calibration
783	8.5849	29237.2	0	?	0	520	0	Calibration
784	8.5959	29005.7	0	?	0	520	0	Calibration
785	8.6068	29121.2	0	?	0	520	0	Calibration
786	8.6178	28981	0	?	0	520	0	Calibration
787	8.6287	29007.8	0	?	0	520	0	Calibration
788	8.6397	29167.2	0	?	0	520	0	Calibration
789	8.6506	29110.8	0	?	0	520	0	Calibration
790	8.6616	29044.6	0	?	0	520	0	Calibration
791	8.6725	28867.9	0	?	0	520	0	Calibration
792	8.6835	29065.1	0	?	0	520	0	Calibration
793	8.6944	29238.6	0	?	0	520	0	Calibration
794	8.7054	29161.5	0	?	0	520	0	Calibration
795	8.7163	29081	0	?	0	520	0	Calibration
796	8.7273	29258.4	0	?	0	520	0	Calibration
797	8.7382	29148.3	0	?	0	520	0	Calibration
798	8.7492	29192.5	0	?	0	520	0	Calibration
799	8.7601	29138	0	?	0	520	0	Calibration
800	8.7711	29005.1	0	?	0	520	0	Calibration
801	8.782	29031.6	0	?	0	520	0	Calibration
802	8.793	29109.7	0	?	0	520	0	Calibration
803	8.8039	29195.6	0	?	0	520	0	Calibration
804	8.8149	29208.1	0	?	0	520	0	Calibration
805	8.8258	29219.8	0	?	0	520	0	Calibration
806	8.8368	29092.6	0	?	0	520	0	Calibration
807	8.8477	29161.3	0	?	0	520	0	Calibration
808	8.8587	29007.9	0	?	0	520	0	Calibration
809	8.8696	29027.5	0	?	0	520	0	Calibration
810	8.8806	29036.4	0	?	0	520	0	Calibration
811	8.8915	29073.7	0	?	0	520	0	Calibration
812	8.9025	28941.9	0	?	0	520	0	Calibration
813	8.9134	29095.1	0	?	0	520	0	Calibration
814	8.9244	28974.7	0	?	0	520	0	Calibration
815	8.9353	29206.9	0	?	0	520	0	Calibration
816	8.9463	29196.9	0	?	0	520	0	Calibration
817	8.9572	29202.8	0	?	0	520	0	Calibration
818	8.9682	29084.4	0	?	0	520	0	Calibration
819	8.9791	29142.8	0	?	0	520	0	Calibration
820	8.9901	29166.5	0	?	0	520	0	Calibration
821	9.001	29172.4	0	?	0	520	0	Calibration
822	9.012	29030.5	0	?	0	520	0	Calibration
823	9.0229	29158.5	0	?	0	520	0	Calibration
824	9.0339	29011.8	0	?	0	520	0	Calibration
825	9.0448	29166.4	0	?	0	520	0	Calibration
826	9.0558	28931.3	0	?	0	520	0	Calibration
827	9.0667	29030.9	0	?	0	520	0	Calibration
828	9.0777	29052.3	0	?	0	520	0	Calibration
829	9.0886	29127.1	0	?	0	520	0	Calibration
830	9.0996	29167.5	0	?	0	520	0	Calibration
831	9.1105	29110.7	0	?	0	520	0	Calibration
832	9.1215	28971.8	0	?	0	520	0	Calibration
833	9.1324	28989.9	0	?	0	520	0	Calibration
834	9.1434	29017.5	0	?	0	520	0	Calibration
835	9.1543	29082.5	0	?	0	520	0	Calibration
836	9.1653	29040.1	0	?	0	520	0	Calibration
837	9.1762	28996.5	0	?	0	520	0	Calibration
838	9.1872	29014.4	0	?	0	520	0	Calibration
839	9.1981	29123	0	?	0	520	0	Calibration
840	9.2091	29096.1	0	?	0	520	0	Calibration
841	9.22	29130.9	0	?	0	520	0	Calibration
842	9.231	29080.7	0	?	0	520	0	Calibration
843	9.2419	28983.1	0	?	0	520	0	Calibration
844	9.2529	29212.3	0	?	0	520	0	Calibration
845	9.2638	28914	0	?	0	520	0	Calibration
846	9.2748	29122.8	0	?	0	520	0	Calibration
847	9.2857	28888.6	0	?	0	520	0	Calibration
848	9.2967	28967.6	0	?	0	520	0	Calibration
849	9.3077	28986.1	0	?	0	520	0	Calibration
850	9.3186	28924.9	0	?	0	520	0	Calibration
851	9.3296	28958.3	0	?	0	520	0	Calibration
852	9.3405	29013.2	0	?	0	520	0	Calibration
853	9.3515	29141.3	0	?	0	520	0	Calibration
854	9.3624	29156.8	0	?	0	520	0	Calibration
855	9.3734	29127.4	0	?	0	520	0	Calibration
856	9.3843	28980.5	0	?	0	520	0	Calibration
857	9.3953	28920.6	0	?	0	520	0	Calibration
858	9.4062	29120.6	0	?	0	520	0	Calibration
859	9.4172	29059.1	0	?	0	520	0	Calibration
860	9.4281	29071	0	?	0	520	0	Calibration
861	9.4391	28955.8	0	?	0	520	0	Calibration
862	9.45	29067.6	0	?	0	520	0	Calibration
863	9.461	29004.9	0	?	0	520	0	Calibration
864	9.4719	28923.6	0	?	0	520	0	Calibration
865	9.4829	29040.5	0	?	0	520	0	Calibration
866	9.4938	29123.9	0	?	0	520	0	Calibration
867	9.5048	28956.2	0	?	0	520	0	Calibration
868	9.5157	29066.2	0	?	0	520	0	Calibration
869	9.5267	29068	0	?	0	520	0	Calibration
870	9.5376	29070.8	0	?	0	520	0	Calibration
871	9.5486	29112.9	0	?	0	520	0	Calibration
872	9.5595	29049.2	0	?	0	520	0	Calibration
873	9.5705	29091.6	0	?	0	520	0	Calibration
874	9.5814	29148.1	0	?	0	520	0	Calibration
875	9.5924	29005.1	0	?	0	520	0	Calibration
876	9.6033	29124.8	0	?	0	520	0	Calibration
877	9.6143	29033.7	0	?	0	520	0	Calibration
878	9.6252	28884.4	0	?	0	520	0	Calibration
879	9.6362	28891	0	?	0	520	0	Calibration
880	9.6471	28934.5	0	?	0	520	0	Calibration
881	9.6581	29118.4	0	?	0	520	0	Calibration
882	9.669	29150.6	0	?	0	520	0	Calibration
883	9.68	28947.3	0	?	0	520	0	Calibration
884	9.6909	28996.3	0	?	0	520	0	Calibration
885	9.7019	29039.3	0	?	0	520	0	Calibration
886	9.7128	29059.4	0	?	0	520	0	Calibration
887	9.7238	29125.9	0	?	0	520	0	Calibration
888	9.7347	28939.8	0	?	0	520	0	Calibration
889	9.7457	29029.8	0	?	0	520	0	Calibration
890	9.7566	28956.7	0	?	0	520	0	Calibration
891	9.7676	29036.1	0	?	0	520	0	Calibration
892	9.7785	28970.2	0	?	0	520	0	Calibration
893	9.7895	28904.4	0	?	0	520	0	Calibration
894	9.8004	28896.5	0	?	0	520	0	Calibration
895	9.8114	29068.3	0	?	0	520	0	Calibration
896	9.8223	28978.3	0	?	0	520	0	Calibration
897	9.8333	28903.8	0	?	0	520	0	Calibration
898	9.8442	29136.9	0	?	0	520	0	Calibration
899	9.8552	28926	0	?	0	520	0	Calibration
900	9.8661	28835.9	0	?	0	520	0	Calibration
901	9.8771	28875.5	0	?	0	520	0	Calibration
902	9.888	29088.8	0	?	0	520	0	Calibration
903	9.899	28950.9	0	?	0	520	0	Calibration
904	9.9099	28901.7	0	?	0	520	0	Calibration
905	9.9209	28958.1	0	?	0	520	0	Calibration
906	9.9318	28882.9	0	?	0	520	0	Calibration
907	9.9428	29075.3	0	?	0	520	0	Calibration
908	9.9537	29124.7	0	?	0	520	0	Calibration
909	9.9647	29100	0	?	0	520	0	Calibration
910	9.9756	29008	0	?	0	520	0	Calibration
911	9.9866	28963.6	0	?	0	520	0	Calibration
912	9.9975	29047.7	0	?	0	520	0	Calibration
913	10.0085	29004.9	0	?	0	520	0	Calibration
914	10.0194	28935.2	0	?	0	520	0	Calibration
915	10.0304	28922.8	0	?	0	520	0	Calibration
916	10.0413	28984.7	0	?	0	520	0	Calibration
917	10.0523	29019.8	0	?	0	520	0	Calibration
918	10.0632	28910.4	0	?	0	520	0	Calibration
919	10.0742	29064.8	0	?	0	520	0	Calibration
920	10.0851	28932.7	0	?	0	520	0	Calibration
921	10.0961	28966.8	0	?	0	520	0	Calibration
922	10.107	29100.8	0	?	0	520	0	Calibration
923	10.118	29132.2	0	?	0	520	0	Calibration
924	10.1289	28974.1	0	?	0	520	0	Calibration
925	10.1399	28878.2	0	?	0	520	0	Calibration
926	10.1508	29144.4	0	?	0	520	0	Calibration
927	10.1618	28929.4	0	?	0	520	0	Calibration
928	10.1727	28903.9	0	?	0	520	0	Calibration
929	10.1837	29052	0	?	0	520	0	Calibration
930	10.1946	28890.7	0	?	0	520	0	Calibration
931	10.2056	29046.1	0	?	0	520	0	Calibration
932	10.2165	28938.6	0	?	0	520	0	Calibration
933	10.2275	29166	0	?	0	520	0	Calibration
934	10.2384	28969.4	0	?	0	520	0	Calibration
935	10.2494	29085.6	0	?	0	520	0	Calibration
936	10.2603	29108.8	0	?	0	520	0	Calibration
937	10.2713	28913.1	0	?	0	520	0	Calibration
938	10.2822	29208.2	0	?	0	520	0	Calibration
939	10.2932	29030.9	0	?	0	520	0	Calibration
940	10.3041	28974.1	0	?	0	520	0	Calibration
941	10.3151	28985.1	0	?	0	520	0	Calibration
942	10.326	29045.2	0	?	0	520	0	Calibration
943	10.337	29065.8	0	?	0	520	0	Calibration
944	10.3479	29017	0	?	0	520	0	Calibration
945	10.3589	29047.5	0	?	0	520	0	Calibration
946	10.3698	29130.4	0	?	0	520	0	Calibration
947	10.3808	28892.2	0	?	0	520	0	Calibration
948	10.3917	29018.2	0	?	0	520	0	Calibration
949	10.4027	28920	0	?	0	520	0	Calibration
950	10.4136	28985.8	0	?	0	520	0	Calibration
951	10.4246	28877.7	0	?	0	520	0	Calibration
952	10.4355	29124.6	0	?	0	520	0	Calibration
953	10.4465	28961	0	?	0	520	0	Calibration
954	10.4574	29012.9	0	?	0	520	0	Calibration
955	10.4684	28938.8	0	?	0	520	0	Calibration
956	10.4793	28968.4	0	?	0	520	0	Calibration
957	10.4903	29054.9	0	?	0	520	0	Calibration
958	10.5012	29017.6	0	?	0	520	0	Calibration
959	10.5122	29168.4	0	?	0	520	0	Calibration
960	10.5231	29045.9	0	?	0	520	0	Calibration
961	10.5341	29105.4	0	?	0	520	0	Calibration
962	10.545	29060	0	?	0	520	0	Calibration
963	10.556	29090.6	0	?	0	520	0	Calibration
964	10.5669	29092	0	?	0	520	0	Calibration
965	10.5779	29037.6	0	?	0	520	0	Calibration
966	10.5888	28897.4	0	?	0	520	0	Calibration
967	10.5998	29088.5	0	?	0	520	0	Calibration
968	10.6107	29029.3	0	?	0	520	0	Calibration
969	10.6217	29088.3	0	?	0	520	0	Calibration
970	10.6326	28951.1	0	?	0	520	0	Calibration
971	10.6436	29106.8	0	?	0	520	0	Calibration
972	10.6545	29113.1	0	?	0	520	0	Calibration
973	10.6655	28941	0	?	0	520	0	Calibration
974	10.6764	28928.6	0	?	0	520	0	Calibration
975	10.6874	28957.6	0	?	0	520	0	Calibration
976	10.6983	28922.4	0	?	0	520	0	Calibration
977	10.7093	28936	0	?	0	520	0	Calibration
978	10.7202	29014.5	0	?	0	520	0	Calibration
979	10.7312	28968.1	0	?	0	520	0	Calibration
980	10.7421	29031.6	0	?	0	520	0	Calibration
981	10.7531	29053.9	0	?	0	520	0	Calibration
982	10.764	28857.1	0	?	0	520	0	Calibration
983	10.775	28931.8	0	?	0	520	0	Calibration
984	10.7859	29093	0	?	0	520	0	Calibration
985	10.7969	28980.9	0	?	0	520	0	Calibration
986	10.8078	28839.3	0	?	0	520	0	Calibration
987	10.8188	28902.2	0	?	0	520	0	Calibration
988	10.8297	28890.1	0	?	0	520	0	Calibration
989	10.8407	29164.4	0	?	0	520	0	Calibration
990	10.8516	29109.4	0	?	0	520	0	Calibration
991	10.8626	28890.3	0	?	0	520	0	Calibration
992	10.8735	28919.5	0	?	0	520	0	Calibration
993	10.8845	28984.3	0	?	0	520	0	Calibration
994	10.8954	29116.3	0	?	0	520	0	Calibration
995	10.9064	28905.1	0	?	0	520	0	Calibration
996	10.9173	28943.6	0	?	0	520	0	Calibration
997	10.9283	29128.6	0	?	0	520	0	Calibration
998	10.9392	28967.1	0	?	0	520	0	Calibration
999	10.9502	28930.1	0	?	0	520	0	Calibration
1000	10.9611	28972.2	0	?	0	520	0	Calibration
1001	10.9721	28982.2	0	?	0	520	0	Calibration
1002	10.983	29067.4	0	?	0	520	0	Calibration
1003	10.994	28909.4	0	?	0	520	0	Calibration
1004	11.0049	28890.2	0	?	0	520	0	Calibration
1005	11.0159	28938.2	0	?	0	520	0	Calibration
1006	11.0268	28929.3	0	?	0	520	0	Calibration
1007	11.0378	28934.8	0	?	0	520	0	Calibration
1008	11.0487	28917.3	0	?	0	520	0	Calibration
1009	11.0597	28862.5	0	?	0	520	0	Calibration
1010	11.0706	28977.3	0	?	0	520	0	Calibration
1011	11.0816	28803.9	0	?	0	520	0	Calibration
1012	11.0925	28908.4	0	?	0	520	0	Calibration
1013	11.1035	28854.3	0	?	0	520	0	Calibration
1014	11.1144	28841.1	0	?	0	520	0	Calibration
1015	11.1254	28833.4	0	?	0	520	0	Calibration
1016	11.1363	28912.8	0	?	0	520	0	Calibration
1017	11.1473	29088.9	0	?	0	520	0	Calibration
1018	11.1582	28827.9	0	?	0	520	0	Calibration
1019	11.1692	28927.7	0	?	0	520	0	Calibration
1020	11.1801	28783.7	0	?	0	520	0	Calibration
1021	11.1911	28976.3	0	?	0	520	0	Calibration
1022	11.202	29017.6	0	?	0	520	0	Calibration
1023	11.213	29033.8	0	?	0	520	0	Calibration
1024	11.2239	29047.4	0	?	0	520	0	Calibration
1025	11.2349	28937.6	0	?	0	520	0	Calibration
1026	11.2458	28931	0	?	0	520	0	Calibration
1027	11.2568	28929.2	0	?	0	520	0	Calibration
1028	11.2677	28858.6	0	?	0	520	0	Calibration
1029	11.2787	28926.4	0	?	0	520	0	Calibration
1030	11.2896	29075.1	0	?	0	520	0	Calibration
1031	11.3006	28916.9	0	?	0	520	0	Calibration
1032	11.3115	28923.8	0	?	0	520	0	Calibration
1033	11.3225	28878.3	0	?	0	520	0	Calibration
1034	11.3334	28934.9	0	?	0	520	0	Calibration
1035	11.3444	28879	0	?	0	520	0	Calibration
1036	11.3553	28912.6	0	?	0	520	0	Calibration
1037	11.3663	29095.8	0	?	0	520	0	Calibration
1038	11.3772	28857.9	0	?	0	520	0	Calibration
1039	11.3882	28865.4	0	?	0	520	0	Calibration
1040	11.3991	28933.4	0	?	0	520	0	Calibration
1041	11.4101	28983.1	0	?	0	520	0	Calibration
1042	11.421	29090.3	0	?	0	520	0	Calibration
1043	11.432	28994.6	0	?	0	520	0	Calibration
1044	11.4429	28947.5	0	?	0	520	0	Calibration
1045	11.4539	28831	0	?	0	520	0	Calibration
1046	11.4648	28860.3	0	?	0	520	0	Calibration
1047	11.4758	28940.1	0	?	0	520	0	Calibration
1048	11.4867	28901.1	0	?	0	520	0	Calibration
1049	11.4977	28951.2	0	?	0	520	0	Calibration
1050	11.5086	29026.8	0	?	0	520	0	Calibration
1051	11.5196	28962.6	0	?	0	520	0	Calibration
1052	11.5305	28852.9	0	?	0	520	0	Calibration
1053	11.5415	28802.3	0	?	0	520	0	Calibration
1054	11.5524	28821.7	0	?	0	520	0	Calibration
1055	11.5634	28922	0	?	0	520	0	Calibration
1056	11.5743	28734.2	0	?	0	520	0	Calibration
1057	11.5853	29038.2	0	?	0	520	0	Calibration
1058	11.5962	28913.4	0	?	0	520	0	Calibration
1059	11.6072	28930.4	0	?	0	520	0	Calibration
1060	11.6181	28769.4	0	?	0	520	0	Calibration
1061	11.6291	28883.2	0	?	0	520	0	Calibration
1062	11.64	28844	0	?	0	520	0	Calibration
1063	11.651	28843.2	0	?	0	520	0	Calibration
1064	11.6619	28919.8	0	?	0	520	0	Calibration
1065	11.6729	28890	0	?	0	520	0	Calibration
1066	11.6838	28930.7	0	?	0	520	0	Calibration
1067	11.6948	28881.7	0	?	0	520	0	Calibration
1068	11.7057	28947	0	?	0	520	0	Calibration
1069	11.7167	28982.9	0	?	0	520	0	Calibration
1070	11.7276	28895.6	0	?	0	520	0	Calibration
1071	11.7386	28867.1	0	?	0	520	0	Calibration
1072	11.7495	28732.1	0	?	0	520	0	Calibration
1073	11.7605	28887.6	0	?	0	520	0	Calibration
1074	11.7714	28820.6	0	?	0	520	0	Calibration
1075	11.7824	28929.2	0	?	0	520	0	Calibration
1076	11.7933	28798	0	?	0	520	0	Calibration
1077	11.8043	28734.9	0	?	0	520	0	Calibration
1078	11.8152	28818	0	?	0	520	0	Calibration
1079	11.8262	28728.9	0	?	0	520	0	Calibration
1080	11.8371	28849.5	0	?	0	520	0	Calibration
1081	11.8481	28820.2	0	?	0	520	0	Calibration
1082	11.859	28899.1	0	?	0	520	0	Calibration
1083	11.87	29006.1	0	?	0	520	0	Calibration
1084	11.8809	28947.5	0	?	0	520	0	Calibration
1085	11.8919	28891.2	0	?	0	520	0	Calibration
1086	11.9028	28891.6	0	?	0	520	0	Calibration
1087	11.9138	28846.7	0	?	0	520	0	Calibration
1088	11.9247	28808.4	0	?	0	520	0	Calibration
1089	11.9357	28871	0	?	0	520	0	Calibration
1090	11.9466	28975.5	0	?	0	520	0	Calibration
1091	11.9576	28754.5	0	?	0	520	0	Calibration
1092	11.9685	28937.8	0	?	0	520	0	Calibration
1093	11.9795	28975.5	0	?	0	520	0	Calibration
1094	11.9904	28781.2	0	?	0	520	0	Calibration
1095	12.0014	28789.1	0	?	0	520	0	Calibration
1096	12.0123	28795.5	0	?	0	520	0	Calibration
1097	12.0233	28982.1	0	?	0	520	0	Calibration
1098	12.0342	28956.1	0	?	0	520	0	Calibration
1099	12.0452	28828.3	0	?	0	520	0	Calibration
1100	12.0561	28952	0	?	0	520	0	Calibration
1101	12.0671	28733.8	0	?	0	520	0	Calibration
1102	12.078	28946.6	0	?	0	520	0	Calibration
1103	12.089	28984.9	0	?	0	520	0	Calibration
1104	12.0999	28972.5	0	?	0	520	0	Calibration
1105	12.1109	28964.7	0	?	0	520	0	Calibration
1106	12.1218	28803.8	0	?	0	520	0	Calibration
1107	12.1328	28875.5	0	?	0	520	0	Calibration
1108	12.1437	28865.8	0	?	0	520	0	Calibration
1109	12.1547	28901.1	0	?	0	520	0	Calibration
1110	12.1656	29041	0	?	0	520	0	Calibration
1111	12.1766	28875.6	0	?	0	520	0	Calibration
1112	12.1875	28678.4	0	?	0	520	0	Calibration
1113	12.1985	28817.6	0	?	0	520	0	Calibration
1114	12.2094	28677.8	0	?	0	520	0	Calibration
1115	12.2204	28922.5	0	?	0	520	0	Calibration
1116	12.2313	28914.5	0	?	0	520	0	Calibration
1117	12.2423	28897.9	0	?	0	520	0	Calibration
1118	12.2532	28735.1	0	?	0	520	0	Calibration
1119	12.2642	28903.1	0	?	0	520	0	Calibration
1120	12.2751	28927.6	0	?	0	520	0	Calibration
1121	12.2861	28967.3	0	?	0	520	0	Calibration
1122	12.297	28644.7	0	?	0	520	0	Calibration
1123	12.308	28987.3	0	?	0	520	0	Calibration
1124	12.3189	28855.2	0	?	0	520	0	Calibration
1125	12.3299	28934.9	0	?	0	520	0	Calibration
1126	12.3408	28877.3	0	?	0	520	0	Calibration
1127	12.3518	28859.2	0	?	0	520	0	Calibration
1128	12.3627	28801.6	0	?	0	520	0	Calibration
1129	12.3737	28798.4	0	?	0	520	0	Calibration
1130	12.3846	28722.4	0	?	0	520	0	Calibration
1131	12.3956	28785.4	0	?	0	520	0	Calibration
1132	12.4066	28870.4	0	?	0	520	0	Calibration
1133	12.4175	28852.8	0	?	0	520	0	Calibration
1134	12.4285	28544.5	0	?	0	520	0	Calibration
1135	12.4394	28827.8	0	?	0	520	0	Calibration
1136	12.4504	28840.3	0	?	0	520	0	Calibration
1137	12.4613	28792.5	0	?	0	520	0	Calibration
1138	12.4723	28853.9	0	?	0	520	0	Calibration
1139	12.4832	28867	0	?	0	520	0	Calibration
1140	12.4942	28881.9	0	?	0	520	0	Calibration
1141	12.5051	28983.7	0	?	0	520	0	Calibration
1142	12.5161	29043.4	0	?	0	520	0	Calibration
1143	12.527	28752.1	0	?	0	520	0	Calibration
1144	12.538	28834.2	0	?	0	520	0	Calibration
1145	12.5489	28765.5	0	?	0	520	0	Calibration
1146	12.5599	28779.3	0	?	0	520	0	Calibration
1147	12.5708	28763.9	0	?	0	520	0	Calibration
1148	12.5818	28870.6	0	?	0	520	0	Calibration
1149	12.5927	28765.8	0	?	0	520	0	Calibration
1150	12.6037	28848.6	0	?	0	520	0	Calibration
1151	12.6146	28834.8	0	?	0	520	0	Calibration
1152	12.6256	28818.5	0	?	0	520	0	Calibration
1153	12.6365	28735.3	0	?	0	520	0	Calibration
1154	12.6475	28718.3	0	?	0	520	0	Calibration
1155	12.6584	28864.8	0	?	0	520	0	Calibration
1156	12.6694	28871.2	0	?	0	520	0	Calibration
1157	12.6803	28737.3	0	?	0	520	0	Calibration
1158	12.6913	28880.1	0	?	0	520	0	Calibration
1159	12.7022	28750.7	0	?	0	520	0	Calibration
1160	12.7132	28812	0	?	0	520	0	Calibration
1161	12.7241	28648.1	0	?	0	520	0	Calibration
1162	12.7351	28760.6	0	?	0	520	0	Calibration
1163	12.746	28717.9	0	?	0	520	0	Calibration
1164	12.757	28728.1	0	?	0	520	0	Calibration
1165	12.7679	28742.6	0	?	0	520	0	Calibration
1166	12.7789	28822.1	0	?	0	520	0	Calibration
1167	12.7898	28836.4	0	?	0	520	0	Calibration
1168	12.8008	28915.8	0	?	0	520	0	Calibration
1169	12.8117	28843.4	0	?	0	520	0	Calibration
1170	12.8227	28937	0	?	0	520	0	Calibration
1171	12.8336	28829.1	0	?	0	520	0	Calibration
1172	12.8446	28779	0	?	0	520	0	Calibration
1173	12.8555	28923.1	0	?	0	520	0	Calibration
1174	12.8665	28742	0	?	0	520	0	Calibration
1175	12.8774	28826.1	0	?	0	520	0	Calibration
1176	12.8884	28856.5	0	?	0	520	0	Calibration
1177	12.8993	28697.9	0	?	0	520	0	Calibration
1178	12.9103	28696	0	?	0	520	0	Calibration
1179	12.9212	28858.9	0	?	0	520	0	Calibration
1180	12.9322	28743.8	0	?	0	520	0	Calibration
1181	12.9431	28802.9	0	?	0	520	0	Calibration
1182	12.9541	28827.6	0	?	0	520	0	Calibration
1183	12.965	28755.6	0	?	0	520	0	Calibration
1184	12.976	28918.6	0	?	0	520	0	Calibration
1185	12.9869	28691	0	?	0	520	0	Calibration
1186	12.9979	28803.2	0	?	0	520	0	Calibration
1187	13.0088	28708.8	0	?	0	520	0	Calibration
1188	13.0198	28884.5	0	?	0	520	0	Calibration
1189	13.0307	28597	0	?	0	520	0	Calibration
1190	13.0417	28739.1	0	?	0	520	0	Calibration
1191	13.0526	28692	0	?	0	520	0	Calibration
1192	13.0636	28769.1	0	?	0	520	0	Calibration
1193	13.0745	28790.2	0	?	0	520	0	Calibration
1194	13.0855	28899.3	0	?	0	520	0	Calibration
1195	13.0964	28728.6	0	?	0	520	0	Calibration
1196	13.1074	28756.2	0	?	0	520	0	Calibration
1197	13.1183	28785.1	0	?	0	520	0	Calibration
1198	13.1293	28732.3	0	?	0	520	0	Calibration
1199	13.1402	28817.7	0	?	0	520	0	Calibration
1200	13.1512	28651	0	?	0	520	0	Calibration
1201	13.1621	28751.4	0	?	0	520	0	Calibration
1202	13.1731	28704.2	0	?	0	520	0	Calibration
1203	13.184	28869.8	0	?	0	520	0	Calibration
1204	13.195	28760.3	0	?	0	520	0	Calibration
1205	13.2059	28809.5	0	?	0	520	0	Calibration
1206	13.2169	28805.6	0	?	0	520	0	Calibration
1207	13.2278	28948.4	0	?	0	520	0	Calibration
1208	13.2388	28730.5	0	?	0	520	0	Calibration
1209	13.2497	28732.4	0	?	0	520	0	Calibration
1210	13.2607	28787.6	0	?	0	520	0	Calibration
1211	13.2716	28755.4	0	?	0	520	0	Calibration
1212	13.2826	28840.8	0	?	0	520	0	Calibration
1213	13.2935	28666.8	0	?	0	520	0	Calibration
1214	13.3045	28815.6	0	?	0	520	0	Calibration
1215	13.3154	28801	0	?	0	520	0	Calibration
1216	13.3264	28631.2	0	?	0	520	0	Calibration
1217	13.3373	28526.4	0	?	0	520	0	Calibration
1218	13.3483	28652.8	0	?	0	520	0	Calibration
1219	13.3592	28757.6	0	?	0	520	0	Calibration
1220	13.3702	28778.2	0	?	0	520	0	Calibration
1221	13.3811	28685.9	0	?	0	520	0	Calibration
1222	13.3921	28778.9	0	?	0	520	0	Calibration
1223	13.403	28747.9	0	?	0	520	0	Calibration
1224	13.414	28658.8	0	?	0	520	0	Calibration
1225	13.4249	28907.5	0	?	0	520	0	Calibration
1226	13.4359	28768.2	0	?	0	520	0	Calibration
1227	13.4468	28640.9	0	?	0	520	0	Calibration
1228	13.4578	28760.2	0	?	0	520	0	Calibration
1229	13.4687	28768.7	0	?	0	520	0	Calibration
1230	13.4797	28738.4	0	?	0	520	0	Calibration
1231	13.4906	28587.6	0	?	0	520	0	Calibration
1232	13.5016	28708.6	0	?	0	520	0	Calibration
1233	13.5125	28675	0	?	0	520	0	Calibration
1234	13.5235	28655.4	0	?	0	520	0	Calibration
1235	13.5344	28773.5	0	?	0	520	0	Calibration
1236	13.5454	28904.9	0	?	0	520	0	Calibration
1237	13.5563	28939.4	0	?	0	520	0	Calibration
1238	13.5673	28811.4	0	?	0	520	0	Calibration
1239	13.5782	28708.6	0	?	0	520	0	Calibration
1240	13.5892	28858.1	0	?	0	520	0	Calibration
1241	13.6001	28750.7	0	?	0	520	0	Calibration
1242	13.6111	28790.3	0	?	0	520	0	Calibration
1243	13.622	28708.7	0	?	0	520	0	Calibration
1244	13.633	28654	0	?	0	520	0	Calibration
1245	13.6439	28637.1	0	?	0	520	0	Calibration
1246	13.6549	28688.5	0	?	0	520	0	Calibration
1247	13.6658	28823.4	0	?	0	520	0	Calibration
1248	13.6768	28744.1	0	?	0	520	0	Calibration
1249	13.6877	28688	0	?	0	520	0	Calibration
1250	13.6987	28834.8	0	?	0	520	0	Calibration
1251	13.7096	28638.8	0	?	0	520	0	Calibration
1252	13.7206	28698.1	0	?	0	520	0	Calibration
1253	13.7315	28768.8	0	?	0	520	0	Calibration
1254	13.7425	28780.6	0	?	0	520	0	Calibration
1255	13.7534	28728.4	0	?	0	520	0	Calibration
1256	13.7644	28690.1	0	?	0	520	0	Calibration
1257	13.7753	28691.5	0	?	0	520	0	Calibration
1258	13.7863	28805.4	0	?	0	520	0	Calibration
1259	13.7972	28911.6	0	?	0	520	0	Calibration
1260	13.8082	28743.2	0	?	0	520	0	Calibration
1261	13.8191	28733.5	0	?	0	520	0	Calibration
1262	13.8301	28882.8	0	?	0	520	0	Calibration
1263	13.841	28710.6	0	?	0	520	0	Calibration
1264	13.852	29011.7	0	?	0	520	0	Calibration
1265	13.8629	28791	0	?	0	520	0	Calibration
1266	13.8739	28574.8	0	?	0	520	0	Calibration
1267	13.8848	28698.5	0	?	0	520	0	Calibration
1268	13.8958	28754.4	0	?	0	520	0	Calibration
1269	13.9067	28790.7	0	?	0	520	0	Calibration
1270	13.9177	28695.7	0	?	0	520	0	Calibration
1271	13.9286	28681.3	0	?	0	520	0	Calibration
1272	13.9396	28748.7	0	?	0	520	0	Calibration
1273	13.9505	28652.5	0	?	0	520	0	Calibration
1274	13.9615	28659.2	0	?	0	520	0	Calibration
1275	13.9724	28734.4	0	?	0	520	0	Calibration
1276	13.9834	28685	0	?	0	520	0	Calibration
1277	13.9943	28786.1	0	?	0	520	0	Calibration
1278	14.0053	28793.4	0	?	0	520	0	Calibration
1279	14.0162	28655.9	0	?	0	520	0	Calibration
1280	14.0272	28628.2	0	?	0	520	0	Calibration
1281	14.0381	28770.3	0	?	0	520	0	Calibration
1282	14.0491	28850.8	0	?	0	520	0	Calibration
1283	14.06	28759.8	0	?	0	520	0	Calibration
1284	14.071	28763.6	0	?	0	520	0	Calibration
1285	14.0819	28703.3	0	?	0	520	0	Calibration
1286	14.0929	28680.4	0	?	0	520	0	Calibration
1287	14.1038	28663.8	0	?	0	520	0	Calibration
1288	14.1148	28754.8	0	?	0	520	0	Calibration
1289	14.1257	28719.3	0	?	0	520	0	Calibration
1290	14.1367	28783.6	0	?	0	520	0	Calibration
1291	14.1476	28715.3	0	?	0	520	0	Calibration
1292	14.1586	28754.1	0	?	0	520	0	Calibration
1293	14.1695	28599.2	0	?	0	520	0	Calibration
1294	14.1805	28547.6	0	?	0	520	0	Calibration
1295	14.1914	28609.4	0	?	0	520	0	Calibration
1296	14.2024	28753.2	0	?	0	520	0	Calibration
1297	14.2133	28626.7	0	?	0	520	0	Calibration
1298	14.2243	28784.1	0	?	0	520	0	Calibration
1299	14.2352	28731.7	0	?	0	520	0	Calibration
1300	14.2462	28835.2	0	?	0	520	0	Calibration
1301	14.2571	28554.5	0	?	0	520	0	Calibration
1302	14.2681	28731.9	0	?	0	520	0	Calibration
1303	14.279	28561	0	?	0	520	0	Calibration
1304	14.29	28673.6	0	?	0	520	0	Calibration
1305	14.3009	28599	0	?	0	520	0	Calibration
1306	14.3119	28712.4	0	?	0	520	0	Calibration
1307	14.3228	28606.3	0	?	0	520	0	Calibration
1308	14.3338	28519.1	0	?	0	520	0	Calibration
1309	14.3447	28659.2	0	?	0	520	0	Calibration
1310	14.3557	28537.9	0	?	0	520	0	Calibration
1311	14.3666	28565.9	0	?	0	520	0	Calibration
1312	14.3776	28630.2	0	?	0	520	0	Calibration
1313	14.3885	28781.6	0	?	0	520	0	Calibration
1314	14.3995	28621.8	0	?	0	520	0	Calibration
1315	14.4104	28678.2	0	?	0	520	0	Calibration
1316	14.4214	28717.4	0	?	0	520	0	Calibration
1317	14.4323	28583.2	0	?	0	520	0	Calibration
1318	14.4433	28646.1	0	?	0	520	0	Calibration
1319	14.4542	28656.1	0	?	0	520	0	Calibration
1320	14.4652	28562.4	0	?	0	520	0	Calibration
1321	14.4761	28566.4	0	?	0	520	0	Calibration
1322	14.4871	28557.3	0	?	0	520	0	Calibration
1323	14.498	28617.8	0	?	0	520	0	Calibration
1324	14.509	28611.3	0	?	0	520	0	Calibration
1325	14.5199	28609.4	0	?	0	520	0	Calibration
1326	14.5309	28566.6	0	?	0	520	0	Calibration
1327	14.5418	28594.9	0	?	0	520	0	Calibration
1328	14.5528	28617.5	0	?	0	520	0	Calibration
1329	14.5637	28594.9	0	?	0	520	0	Calibration
1330	14.5747	28736.7	0	?	0	520	0	Calibration
1331	14.5856	28591.4	0	?	0	520	0	Calibration
1332	14.5966	28564.7	0	?	0	520	0	Calibration
1333	14.6075	28707.4	0	?	0	520	0	Calibration
1334	14.6185	28403.3	0	?	0	520	0	Calibration
1335	14.6294	28705	0	?	0	520	0	Calibration
1336	14.6404	28536.4	0	?	0	520	0	Calibration
1337	14.6513	28712.9	0	?	0	520	0	Calibration
1338	14.6623	28827.9	0	?	0	520	0	Calibration
1339	14.6732	28729.8	0	?	0	520	0	Calibration
1340	14.6842	28652.8	0	?	0	520	0	Calibration
1341	14.6951	28642	0	?	0	520	0	Calibration
1342	14.7061	28493.2	0	?	0	520	0	Calibration
1343	14.717	28642.2	0	?	0	520	0	Calibration
1344	14.728	28713.6	0	?	0	520	0	Calibration
1345	14.7389	28676.7	0	?	0	520	0	Calibration
1346	14.7499	28651	0	?	0	520	0	Calibration
1347	14.7608	28751.5	0	?	0	520	0	Calibration
1348	14.7718	28559.5	0	?	0	520	0	Calibration
1349	14.7827	28661.8	0	?	0	520	0	Calibration
1350	14.7937	28727.1	0	?	0	520	0	Calibration
1351	14.8046	28667.5	0	?	0	520	0	Calibration
1352	14.8156	28667.1	0	?	0	520	0	Calibration
1353	14.8265	28584.2	0	?	0	520	0	Calibration
1354	14.8375	28656.2	0	?	0	520	0	Calibration
1355	14.8484	28656.8	0	?	0	520	0	Calibration
1356	14.8594	28609.8	0	?	0	520	0	Calibration
1357	14.8703	28647.4	0	?	0	520	0	Calibration
1358	14.8813	28734.7	0	?	0	520	0	Calibration
1359	14.8922	28637.4	0	?	0	520	0	Calibration
1360	14.9032	28602.7	0	?	0	520	0	Calibration
1361	14.9141	28600.6	0	?	0	520	0	Calibration
1362	14.9251	28684.8	0	?	0	520	0	Calibration
1363	14.936	28688.4	0	?	0	520	0	Calibration
1364	14.947	28537.6	0	?	0	520	0	Calibration
1365	14.9579	28768.1	0	?	0	520	0	Calibration
1366	14.9689	28620.4	0	?	0	520	0	Calibration
1367	14.9798	28602.9	0	?	0	520	0	Calibration
1368	14.9908	28687.5	0	?	0	520	0	Calibration
1369	15.0017	28471.2	0	?	0	520	0	Calibration
1370	15.0127	28524.2	0	?	0	520	0	Calibration
1371	15.0236	28644.9	0	?	0	520	0	Calibration
1372	15.0346	28540.6	0	?	0	520	0	Calibration
1373	15.0455	28593	0	?	0	520	0	Calibration
1374	15.0565	28580.1	0	?	0	520	0	Calibration
1375	15.0674	28587	0	?	0	520	0	Calibration
1376	15.0784	28705.3	0	?	0	520	0	Calibration
1377	15.0893	28632.4	0	?	0	520	0	Calibration
1378	15.1003	28573.6	0	?	0	520	0	Calibration
1379	15.1112	28478.2	0	?	0	520	0	Calibration
1380	15.1222	28654.4	0	?	0	520	0	Calibration
1381	15.1331	28758.9	0	?	0	520	0	Calibration
1382	15.1441	28694.6	0	?	0	520	0	Calibration
1383	15.155	28672.2	0	?	0	520	0	Calibration
1384	15.166	28623.3	0	?	0	520	0	Calibration
1385	15.1769	28550.4	0	?	0	520	0	Calibration
1386	15.1879	28620	0	?	0	520	0	Calibration
1387	15.1988	28656.5	0	?	0	520	0	Calibration
1388	15.2098	28768.3	0	?	0	520	0	Calibration
1389	15.2207	28428.4	0	?	0	520	0	Calibration
1390	15.2317	28424	0	?	0	520	0	Calibration
1391	15.2426	28579.4	0	?	0	520	0	Calibration
1392	15.2536	28661.7	0	?	0	520	0	Calibration
1393	15.2645	28715.4	0	?	0	520	0	Calibration
1394	15.2755	28513.2	0	?	0	520	0	Calibration
1395	15.2864	28659.7	0	?	0	520	0	Calibration
1396	15.2974	28645.9	0	?	0	520	0	Calibration
1397	15.3083	28803.6	0	?	0	520	0	Calibration
1398	15.3193	28617.2	0	?	0	520	0	Calibration
1399	15.3302	28667.9	0	?	0	520	0	Calibration
1400	15.3412	28664.5	0	?	0	520	0	Calibration
1401	15.3521	28591.5	0	?	0	520	0	Calibration
1402	15.3631	28747.7	0	?	0	520	0	Calibration
1403	15.374	28693.7	0	?	0	520	0	Calibration
1404	15.385	28648.8	0	?	0	520	0	Calibration
1405	15.3959	28550.4	0	?	0	520	0	Calibration
1406	15.4069	28501.7	0	?	0	520	0	Calibration
1407	15.4178	28492	0	?	0	520	0	Calibration
1408	15.4288	28501.9	0	?	0	520	0	Calibration
1409	15.4397	28505.5	0	?	0	520	0	Calibration
1410	15.4507	28586.3	0	?	0	520	0	Calibration
1411	15.4616	28447.1	0	?	0	520	0	Calibration
1412	15.4726	28678.9	0	?	0	520	0	Calibration
1413	15.4835	28428.9	0	?	0	520	0	Calibration
1414	15.4945	28576.6	0	?	0	520	0	Calibration
1415	15.5055	28551.2	0	?	0	520	0	Calibration
1416	15.5164	28604.1	0	?	0	520	0	Calibration
1417	15.5274	28639.2	0	?	0	520	0	Calibration
1418	15.5383	28623.1	0	?	0	520	0	Calibration
1419	15.5493	28651.4	0	?	0	520	0	Calibration
1420	15.5602	28528.5	0	?	0	520	0	Calibration
1421	15.5712	28602.9	0	?	0	520	0	Calibration
1422	15.5821	28652.9	0	?	0	520	0	Calibration
1423	15.5931	28439.4	0	?	0	520	0	Calibration
1424	15.604	28643.7	0	?	0	520	0	Calibration
1425	15.615	28643.8	0	?	0	520	0	Calibration
1426	15.6259	28712.8	0	?	0	520	0	Calibration
1427	15.6369	28584.1	0	?	0	520	0	Calibration
1428	15.6478	28653.8	0	?	0	520	0	Calibration
1429	15.6588	28400	0	?	0	520	0	Calibration
1430	15.6697	28753.5	0	?	0	520	0	Calibration
1431	15.6807	28523.4	0	?	0	520	0	Calibration
1432	15.6916	28593.7	0	?	0	520	0	Calibration
1433	15.7026	28661.9	0	?	0	520	0	Calibration
1434	15.7135	28449.7	0	?	0	520	0	Calibration
1435	15.7245	28635.2	0	?	0	520	0	Calibration
1436	15.7354	28470.5	0	?	0	520	0	Calibration
1437	15.7464	28586.5	0	?	0	520	0	Calibration
1438	15.7573	28634	0	?	0	520	0	Calibration
1439	15.7683	28609.8	0	?	0	520	0	Calibration
1440	15.7792	28557.8	0	?	0	520	0	Calibration
1441	15.7902	28573.5	0	?	0	520	0	Calibration
1442	15.8011	28626	0	?	0	520	0	Calibration
1443	15.8121	28486	0	?	0	520	0	Calibration
1444	15.823	28500.6	0	?	0	520	0	Calibration
1445	15.834	28602	0	?	0	520	0	Calibration
1446	15.8449	28468.8	0	?	0	520	0	Calibration
1447	15.8559	28532.3	0	?	0	520	0	Calibration
1448	15.8668	28732.9	0	?	0	520	0	Calibration
1449	15.8778	28568.6	0	?	0	520	0	Calibration
1450	15.8887	28495.4	0	?	0	520	0	Calibration
1451	15.8997	28490	0	?	0	520	0	Calibration
1452	15.9106	28582	0	?	0	520	0	Calibration
1453	15.9216	28469.8	0	?	0	520	0	Calibration
1454	15.9325	28603	0	?	0	520	0	Calibration
1455	15.9435	28552.2	0	?	0	520	0	Calibration
1456	15.9544	28598.1	0	?	0	520	0	Calibration
1457	15.9654	28672.4	0	?	0	520	0	Calibration
1458	15.9763	28501.8	0	?	0	520	0	Calibration
1459	15.9873	28536	0	?	0	520	0	Calibration
1460	15.9982	28603.2	0	?	0	520	0	Calibration
1461	16.0092	28424.1	0	?	0	520	0	Calibration
1462	16.0201	28537.5	0	?	0	520	0	Calibration
1463	16.0311	28449.7	0	?	0	520	0	Calibration
1464	16.042	28624	0	?	0	520	0	Calibration
1465	16.053	28463.5	0	?	0	520	0	Calibration
1466	16.0639	28629.6	0	?	0	520	0	Calibration
1467	16.0749	28595.4	0	?	0	520	0	Calibration
1468	16.0858	28555.4	0	?	0	520	0	Calibration
1469	16.0968	28464.2	0	?	0	520	0	Calibration
1470	16.1077	28559.9	0	?	0	520	0	Calibration
1471	16.1187	28411.9	0	?	0	520	0	Calibration
1472	16.1296	28446.1	0	?	0	520	0	Calibration
1473	16.1406	28652.5	0	?	0	520	0	Calibration
1474	16.1515	28517.1	0	?	0	520	0	Calibration
1475	16.1625	28470.7	0	?	0	520	0	Calibration
1476	16.1734	28498.9	0	?	0	520	0	Calibration
1477	16.1844	28531.3	0	?	0	520	0	Calibration
1478	16.1953	28480.5	0	?	0	520	0	Calibration
1479	16.2063	28419.3	0	?	0	520	0	Calibration
1480	16.2172	28517.8	0	?	0	520	0	Calibration
1481	16.2282	28535.1	0	?	0	520	0	Calibration
1482	16.2391	28433.6	0	?	0	520	0	Calibration
1483	16.2501	28463.4	0	?	0	520	0	Calibration
1484	16.261	28630.4	0	?	0	520	0	Calibration
1485	16.272	28495.4	0	?	0	520	0	Calibration
1486	16.2829	28557	0	?	0	520	0	Calibration
1487	16.2939	28654.3	0	?	0	520	0	Calibration
1488	16.3048	28563.8	0	?	0	520	0	Calibration
1489	16.3158	28508	0	?	0	520	0	Calibration
1490	16.3267	28570.3	0	?	0	520	0	Calibration
1491	16.3377	28537.1	0	?	0	520	0	Calibration
1492	16.3486	28527.4	0	?	0	520	0	Calibration
1493	16.3596	28394.9	0	?	0	520	0	Calibration
1494	16.3705	28488.8	0	?	0	520	0	Calibration
1495	16.3815	28546.1	0	?	0	520	0	Calibration
1496	16.3924	28533.8	0	?	0	520	0	Calibration
1497	16.4034	28524.5	0	?	0	520	0	Calibration
1498	16.4143	28521.2	0	?	0	520	0	Calibration
1499	16.4253	28489.1	0	?	0	520	0	Calibration
1500	16.4362	28411.6	0	?	0	520	0	Calibration
1501	16.4472	28333.5	0	?	0	520	0	Calibration
1502	16.4581	28443.5	0	?	0	520	0	Calibration
1503	16.4691	28395.2	0	?	0	520	0	Calibration
1504	16.48	28552.6	0	?	0	520	0	Calibration
1505	16.491	28527.9	0	?	0	520	0	Calibration
1506	16.5019	28374.8	0	?	0	520	0	Calibration
1507	16.5129	28444	0	?	0	520	0	Calibration
1508	16.5238	28541.9	0	?	0	520	0	Calibration
1509	16.5348	28527.1	0	?	0	520	0	Calibration
1510	16.5457	28483.9	0	?	0	520	0	Calibration
1511	16.5567	28572.2	0	?	0	520	0	Calibration
1512	16.5676	28488.8	0	?	0	520	0	Calibration
1513	16.5786	28472.8	0	?	0	520	0	Calibration
1514	16.5895	28419.7	0	?	0	520	0	Calibration
1515	16.6005	28538.1	0	?	0	520	0	Calibration
1516	16.6114	28421.2	0	?	0	520	0	Calibration
1517	16.6224	28482.2	0	?	0	520	0	Calibration
1518	16.6333	28389.1	0	?	0	520	0	Calibration
1519	16.6443	28465.6	0	?	0	520	0	Calibration
1520	16.6552	28435.1	0	?	0	520	0	Calibration
1521	16.6662	28584.9	0	?	0	520	0	Calibration
1522	16.6771	28491.6	0	?	0	520	0	Calibration
1523	16.6881	28671.2	0	?	0	520	0	Calibration
1524	16.699	28595.8	0	?	0	520	0	Calibration
1525	16.71	28376.1	0	?	0	520	0	Calibration
1526	16.7209	28417.4	0	?	0	520	0	Calibration
1527	16.7319	28440.2	0	?	0	520	0	Calibration
1528	16.7428	28461.2	0	?	0	520	0	Calibration
1529	16.7538	28664.2	0	?	0	520	0	Calibration
1530	16.7647	28709.2	0	?	0	520	0	Calibration
1531	16.7757	28545.5	0	?	0	520	0	Calibration
1532	16.7866	28604.1	0	?	0	520	0	Calibration
1533	16.7976	28504.6	0	?	0	520	0	Calibration
1534	16.8085	28579.8	0	?	0	520	0	Calibration
1535	16.8195	28459.1	0	?	0	520	0	Calibration
1536	16.8304	28551.5	0	?	0	520	0	Calibration
1537	16.8414	28477.7	0	?	0	520	0	Calibration
1538	16.8523	28490.7	0	?	0	520	0	Calibration
1539	16.8633	28542.6	0	?	0	520	0	Calibration
1540	16.8742	28448.3	0	?	0	520	0	Calibration
1541	16.8852	28537	0	?	0	520	0	Calibration
1542	16.8961	28309	0	?	0	520	0	Calibration
1543	16.9071	28430.1	0	?	0	520	0	Calibration
1544	16.918	28439.6	0	?	0	520	0	Calibration
1545	16.929	28479.1	0	?	0	520	0	Calibration
1546	16.9399	28226.3	0	?	0	520	0	Calibration
1547	16.9509	28424.1	0	?	0	520	0	Calibration
1548	16.9618	28533.6	0	?	0	520	0	Calibration
1549	16.9728	28397.1	0	?	0	520	0	Calibration
1550	16.9837	28456	0	?	0	520	0	Calibration
1551	16.9947	28540.4	0	?	0	520	0	Calibration
1552	17.0056	28302.5	0	?	0	520	0	Calibration
1553	17.0166	28467.1	0	?	0	520	0	Calibration
1554	17.0275	28648.2	0	?	0	520	0	Calibration
1555	17.0385	28500.6	0	?	0	520	0	Calibration
1556	17.0494	28482	0	?	0	520	0	Calibration
1557	17.0604	28420.9	0	?	0	520	0	Calibration
1558	17.0713	28561.3	0	?	0	520	0	Calibration
1559	17.0823	28548.3	0	?	0	520	0	Calibration
1560	17.0932	28619.3	0	?	0	520	0	Calibration
1561	17.1042	28487.5	0	?	0	520	0	Calibration
1562	17.1151	28504.9	0	?	0	520	0	Calibration
1563	17.1261	28547.7	0	?	0	520	0	Calibration
1564	17.137	28497.3	0	?	0	520	0	Calibration
1565	17.148	28446.7	0	?	0	520	0	Calibration
1566	17.1589	28456.7	0	?	0	520	0	Calibration
1567	17.1699	28426	0	?	0	520	0	Calibration
1568	17.1808	28518.6	0	?	0	520	0	Calibration
1569	17.1918	28474.3	0	?	0	520	0	Calibration
1570	17.2027	28547.4	0	?	0	520	0	Calibration
1571	17.2137	28400.2	0	?	0	520	0	Calibration
1572	17.2246	28408.6	0	?	0	520	0	Calibration
1573	17.2356	28314.8	0	?	0	520	0	Calibration
1574	17.2465	28473	0	?	0	520	0	Calibration
1575	17.2575	28483.2	0	?	0	520	0	Calibration
1576	17.2684	28357.1	0	?	0	520	0	Calibration
1577	17.2794	28538.6	0	?	0	520	0	Calibration
1578	17.2903	28254.6	0	?	0	520	0	Calibration
1579	17.3013	28348.6	0	?	0	520	0	Calibration
1580	17.3122	28510.4	0	?	0	520	0	Calibration
1581	17.3232	28189	0	?	0	520	0	Calibration
1582	17.3341	28303.9	0	?	0	520	0	Calibration
1583	17.3451	28350.5	0	?	0	520	0	Calibration
1584	17.356	28478.9	0	?	0	520	0	Calibration
1585	17.367	28480.9	0	?	0	520	0	Calibration
1586	17.3779	28530.9	0	?	0	520	0	Calibration
1587	17.3889	28313.9	0	?	0	520	0	Calibration
1588	17.3998	28380.5	0	?	0	520	0	Calibration
1589	17.4108	28516.7	0	?	0	520	0	Calibration
1590	17.4217	28426.2	0	?	0	520	0	Calibration
1591	17.4327	28470.2	0	?	0	520	0	Calibration
1592	17.4436	28470.8	0	?	0	520	0	Calibration
1593	17.4546	28401.3	0	?	0	520	0	Calibration
1594	17.4655	28522.9	0	?	0	520	0	Calibration
1595	17.4765	28398.2	0	?	0	520	0	Calibration
1596	17.4874	28193.5	0	?	0	520	0	Calibration
1597	17.4984	28394.4	0	?	0	520	0	Calibration
1598	17.5093	28456.2	0	?	0	520	0	Calibration
1599	17.5203	28538.1	0	?	0	520	0	Calibration
1600	17.5312	28495.7	0	?	0	520	0	Calibration
1601	17.5422	28428	0	?	0	520	0	Calibration
1602	17.5531	28500.7	0	?	0	520	0	Calibration
1603	17.5641	28417.1	0	?	0	520	0	Calibration
1604	17.575	28627.5	0	?	0	520	0	Calibration
1605	17.586	28443.4	0	?	0	520	0	Calibration
1606	17.5969	28408.2	0	?	0	520	0	Calibration
1607	17.6079	28450.5	0	?	0	520	0	Calibration
1608	17.6188	28395.4	0	?	0	520	0	Calibration
1609	17.6298	28525	0	?	0	520	0	Calibration
1610	17.6407	28462.9	0	?	0	520	0	Calibration
1611	17.6517	28449	0	?	0	520	0	Calibration
1612	17.6626	28464.6	0	?	0	520	0	Calibration
1613	17.6736	28601.5	0	?	0	520	0	Calibration
1614	17.6845	28364.9	0	?	0	520	0	Calibration
1615	17.6955	28277.8	0	?	0	520	0	Calibration
1616	17.7064	28478.9	0	?	0	520	0	Calibration
1617	17.7174	28464	0	?	0	520	0	Calibration
1618	17.7283	28330.5	0	?	0	520	0	Calibration
1619	17.7393	28309.1	0	?	0	520	0	Calibration
1620	17.7502	28554.1	0	?	0	520	0	Calibration
1621	17.7612	28413.6	0	?	0	520	0	Calibration
1622	17.7721	28391.1	0	?	0	520	0	Calibration
1623	17.7831	28258.3	0	?	0	520	0	Calibration
1624	17.794	28340.9	0	?	0	520	0	Calibration
1625	17.805	28507.4	0	?	0	520	0	Calibration
1626	17.8159	28498.4	0	?	0	520	0	Calibration
1627	17.8269	28444.2	0	?	0	520	0	Calibration
1628	17.8378	28484.7	0	?	0	520	0	Calibration
1629	17.8488	28411.1	0	?	0	520	0	Calibration
1630	17.8597	28360.2	0	?	0	520	0	Calibration
1631	17.8707	28433.9	0	?	0	520	0	Calibration
1632	17.8816	28392.7	0	?	0	520	0	Calibration
1633	17.8926	28427.2	0	?	0	520	0	Calibration
1634	17.9035	28364.6	0	?	0	520	0	Calibration
1635	17.9145	28548.5	0	?	0	520	0	Calibration
1636	17.9254	28521.8	0	?	0	520	0	Calibration
1637	17.9364	28317.1	0	?	0	520	0	Calibration
1638	17.9473	28316.1	0	?	0	520	0	Calibration
1639	17.9583	28400.6	0	?	0	520	0	Calibration
1640	17.9692	28316.6	0	?	0	520	0	Calibration
1641	17.9802	28264.1	0	?	0	520	0	Calibration
1642	17.9911	28384.2	0	?	0	520	0	Calibration
1643	18.0021	28365.1	0	?	0	520	0	Calibration
1644	18.013	28330.3	0	?	0	520	0	Calibration
1645	18.024	28291.9	0	?	0	520	0	Calibration
1646	18.0349	28205.1	0	?	0	520	0	Calibration
1647	18.0459	28249.1	0	?	0	520	0	Calibration
1648	18.0568	28569.2	0	?	0	520	0	Calibration
1649	18.0678	28338.4	0	?	0	520	0	Calibration
1650	18.0787	28388.8	0	?	0	520	0	Calibration
1651	18.0897	28491.2	0	?	0	520	0	Calibration
1652	18.1006	28397.4	0	?	0	520	0	Calibration
1653	18.1116	28349.9	0	?	0	520	0	Calibration
1654	18.1225	28439.7	0	?	0	520	0	Calibration
1655	18.1335	28320.8	0	?	0	520	0	Calibration
1656	18.1444	28359.4	0	?	0	520	0	Calibration
1657	18.1554	28394.8	0	?	0	520	0	Calibration
1658	18.1663	28454.2	0	?	0	520	0	Calibration
1659	18.1773	28466.1	0	?	0	520	0	Calibration
1660	18.1882	28273.5	0	?	0	520	0	Calibration
1661	18.1992	28429.8	0	?	0	520	0	Calibration
1662	18.2101	28383.8	0	?	0	520	0	Calibration
1663	18.2211	28476.4	0	?	0	520	0	Calibration
1664	18.232	28410.2	0	?	0	520	0	Calibration
1665	18.243	28261.3	0	?	0	520	0	Calibration
1666	18.2539	28412.5	0	?	0	520	0	Calibration
1667	18.2649	28371.3	0	?	0	520	0	Calibration
1668	18.2758	28359	0	?	0	520	0	Calibration
1669	18.2868	28295	0	?	0	520	0	Calibration
1670	18.2977	28354.3	0	?	0	520	0	Calibration
1671	18.3087	28399.9	0	?	0	520	0	Calibration
1672	18.3196	28428.4	0	?	0	520	0	Calibration
1673	18.3306	28521	0	?	0	520	0	Calibration
1674	18.3415	28389.9	0	?	0	520	0	Calibration
1675	18.3525	28349.6	0	?	0	520	0	Calibration
1676	18.3634	28433.1	0	?	0	520	0	Calibration
1677	18.3744	28118.9	0	?	0	520	0	Calibration
1678	18.3853	28388.8	0	?	0	520	0	Calibration
1679	18.3963	28341.1	0	?	0	520	0	Calibration
1680	18.4072	28403	0	?	0	520	0	Calibration
1681	18.4182	28356.3	0	?	0	520	0	Calibration
1682	18.4291	28220.2	0	?	0	520	0	Calibration
1683	18.4401	28388.1	0	?	0	520	0	Calibration
1684	18.451	28396.8	0	?	0	520	0	Calibration
1685	18.462	28391.2	0	?	0	520	0	Calibration
1686	18.4729	28293.1	0	?	0	520	0	Calibration
1687	18.4839	28388.4	0	?	0	520	0	Calibration
1688	18.4948	28493.3	0	?	0	520	0	Calibration
1689	18.5058	28433.4	0	?	0	520	0	Calibration
1690	18.5167	28428.1	0	?	0	520	0	Calibration
1691	18.5277	28358.1	0	?	0	520	0	Calibration
1692	18.5386	28435.4	0	?	0	520	0	Calibration
1693	18.5496	28528.1	0	?	0	520	0	Calibration
1694	18.5605	28485.2	0	?	0	520	0	Calibration
1695	18.5715	28379.8	0	?	0	520	0	Calibration
1696	18.5824	28265.8	0	?	0	520	0	Calibration
1697	18.5934	28245.1	0	?	0	520	0	Calibration
1698	18.6044	28387.8	0	?	0	520	0	Calibration
1699	18.6153	28418.4	0	?	0	520	0	Calibration
1700	18.6263	28263.7	0	?	0	520	0	Calibration
1701	18.6372	28420.4	0	?	0	520	0	Calibration
1702	18.6482	28177.8	0	?	0	520	0	Calibration
1703	18.6591	28378.9	0	?	0	520	0	Calibration
1704	18.6701	28386.1	0	?	0	520	0	Calibration
1705	18.681	28278.3	0	?	0	520	0	Calibration
1706	18.692	28454.8	0	?	0	520	0	Calibration
1707	18.7029	28484.8	0	?	0	520	0	Calibration
1708	18.7139	28298.3	0	?	0	520	0	Calibration
1709	18.7248	28273.6	0	?	0	520	0	Calibration
1710	18.7358	28320.8	0	?	0	520	0	Calibration
1711	18.7467	28356.3	0	?	0	520	0	Calibration
1712	18.7577	28365.9	0	?	0	520	0	Calibration
1713	18.7686	28365.5	0	?	0	520	0	Calibration
1714	18.7796	28403.8	0	?	0	520	0	Calibration
1715	18.7905	28495.4	0	?	0	520	0	Calibration
1716	18.8015	28427	0	?	0	520	0	Calibration
1717	18.8124	28381.8	0	?	0	520	0	Calibration
1718	18.8234	28396.1	0	?	0	520	0	Calibration
1719	18.8343	28213.2	0	?	0	520	0	Calibration
1720	18.8453	28264	0	?	0	520	0	Calibration
1721	18.8562	28392.3	0	?	0	520	0	Calibration
1722	18.8672	28288.9	0	?	0	520	0	Calibration
1723	18.8781	28185.5	0	?	0	520	0	Calibration
1724	18.8891	28156.7	0	?	0	520	0	Calibration
1725	18.9	28309.7	0	?	0	520	0	Calibration
1726	18.911	28413.5	0	?	0	520	0	Calibration
1727	18.9219	28396.9	0	?	0	520	0	Calibration
1728	18.9329	28337.1	0	?	0	520	0	Calibration
1729	18.9438	28255.9	0	?	0	520	0	Calibration
1730	18.9548	28241.7	0	?	0	520	0	Calibration
1731	18.9657	28209.8	0	?	0	520	0	Calibration
1732	18.9767	28291.3	0	?	0	520	0	Calibration
1733	18.9876	28439.2	0	?	0	520	0	Calibration
1734	18.9986	28306	0	?	0	520	0	Calibration
1735	19.0095	28370.5	0	?	0	520	0	Calibration
1736	19.0205	28484.7	0	?	0	520	0	Calibration
1737	19.0314	28276.8	0	?	0	520	0	Calibration
1738	19.0424	28327	0	?	0	520	0	Calibration
1739	19.0533	28264.7	0	?	0	520	0	Calibration
1740	19.0643	28505	0	?	0	520	0	Calibration
1741	19.0752	28528.5	0	?	0	520	0	Calibration
1742	19.0862	28413.8	0	?	0	520	0	Calibration
1743	19.0971	28223.5	0	?	0	520	0	Calibration
1744	19.1081	28255.3	0	?	0	520	0	Calibration
1745	19.119	28233.5	0	?	0	520	0	Calibration
1746	19.13	28303.9	0	?	0	520	0	Calibration
1747	19.1409	28302.5	0	?	0	520	0	Calibration
1748	19.1519	28299.8	0	?	0	520	0	Calibration
1749	19.1628	28471.1	0	?	0	520	0	Calibration
1750	19.1738	28373.6	0	?	0	520	0	Calibration
1751	19.1847	28430	0	?	0	520	0	Calibration
1752	19.1957	28384.2	0	?	0	520	0	Calibration
1753	19.2066	28199.6	0	?	0	520	0	Calibration
1754	19.2176	28293.9	0	?	0	520	0	Calibration
1755	19.2285	28259.6	0	?	0	520	0	Calibration
1756	19.2395	28295.2	0	?	0	520	0	Calibration
1757	19.2504	28296.6	0	?	0	520	0	Calibration
1758	19.2614	28265.5	0	?	0	520	0	Calibration
1759	19.2723	28394.3	0	?	0	520	0	Calibration
1760	19.2833	28194.8	0	?	0	520	0	Calibration
1761	19.2942	28211.7	0	?	0	520	0	Calibration
1762	19.3052	28404	0	?	0	520	0	Calibration
1763	19.3161	28493.2	0	?	0	520	0	Calibration
1764	19.3271	28333.6	0	?	0	520	0	Calibration
1765	19.338	28368.5	0	?	0	520	0	Calibration
1766	19.349	28422.5	0	?	0	520	0	Calibration
1767	19.3599	28493.4	0	?	0	520	0	Calibration
1768	19.3709	28292	0	?	0	520	0	Calibration
1769	19.3818	28275.1	0	?	0	520	0	Calibration
1770	19.3928	28327.6	0	?	0	520	0	Calibration
1771	19.4037	28335	0	?	0	520	0	Calibration
1772	19.4147	28396.3	0	?	0	520	0	Calibration
1773	19.4256	28294	0	?	0	520	0	Calibration
1774	19.4366	28371.8	0	?	0	520	0	Calibration
1775	19.4475	28246.4	0	?	0	520	0	Calibration
1776	19.4585	28417.8	0	?	0	520	0	Calibration
1777	19.4694	28342.5	0	?	0	520	0	Calibration
1778	19.4804	28348.1	0	?	0	520	0	Calibration
1779	19.4913	28260.9	0	?	0	520	0	Calibration
1780	19.5023	28349.4	0	?	0	520	0	Calibration
1781	19.5132	28255.4	0	?	0	520	0	Calibration
1782	19.5242	28305.4	0	?	0	520	0	Calibration
1783	19.5351	28449.1	0	?	0	520	0	Calibration
1784	19.5461	28405.9	0	?	0	520	0	Calibration
1785	19.557	28353	0	?	0	520	0	Calibration
1786	19.568	28345.7	0	?	0	520	0	Calibration
1787	19.5789	28328.5	0	?	0	520	0	Calibration
1788	19.5899	28243.4	0	?	0	520	0	Calibration
1789	19.6008	28231.4	0	?	0	520	0	Calibration
1790	19.6118	28464	0	?	0	520	0	Calibration
1791	19.6227	28334.7	0	?	0	520	0	Calibration
1792	19.6337	28245.8	0	?	0	520	0	Calibration
1793	19.6446	28346.5	0	?	0	520	0	Calibration
1794	19.6556	28290.8	0	?	0	520	0	Calibration
1795	19.6665	28265	0	?	0	520	0	Calibration
1796	19.6775	28275	0	?	0	520	0	Calibration
1797	19.6884	28402.3	0	?	0	520	0	Calibration
1798	19.6994	28241.4	0	?	0	520	0	Calibration
1799	19.7103	28399.9	0	?	0	520	0	Calibration
1800	19.7213	28282.3	0	?	0	520	0	Calibration
1801	19.7322	28339.4	0	?	0	520	0	Calibration
1802	19.7432	28191.1	0	?	0	520	0	Calibration
1803	19.7541	28316.1	0	?	0	520	0	Calibration
1804	19.7651	28328	0	?	0	520	0	Calibration
1805	19.776	28313.6	0	?	0	520	0	Calibration
1806	19.787	28293.8	0	?	0	520	0	Calibration
1807	19.7979	28230.1	0	?	0	520	0	Calibration
1808	19.8089	28272.2	0	?	0	520	0	Calibration
1809	19.8198	28309.7	0	?	0	520	0	Calibration
1810	19.8308	28355.5	0	?	0	520	0	Calibration
1811	19.8417	28261.2	0	?	0	520	0	Calibration
1812	19.8527	28487.4	0	?	0	520	0	Calibration
1813	19.8636	28370.8	0	?	0	520	0	Calibration
1814	19.8746	28426.7	0	?	0	520	0	Calibration
1815	19.8855	28400.4	0	?	0	520	0	Calibration
1816	19.8965	28461.2	0	?	0	520	0	Calibration
1817	19.9074	28303.2	0	?	0	520	0	Calibration
1818	19.9184	28393.9	0	?	0	520	0	Calibration
1819	19.9293	28362.6	0	?	0	520	0	Calibration
1820	19.9403	28283.4	0	?	0	520	0	Calibration
1821	19.9512	28395.3	0	?	0	520	0	Calibration
1822	19.9622	28325	0	?	0	520	0	Calibration
1823	19.9731	28290.1	0	?	0	520	0	Calibration
1824	19.9841	28322.2	0	?	0	520	0	Calibration
1825	19.995	28259	0	?	0	520	0	Calibration
1826	20.006	28378.1	0	?	0	520	0	Calibration
1827	20.0169	28326.9	0	?	0	520	0	Calibration
1828	20.0279	28360.6	0	?	0	520	0	Calibration
1829	20.0388	28360.3	0	?	0	520	0	Bleach correction function: exp. offset = -2274.98882758285 * exp(--2.6062585907551863E-4 * x) + 31897.945826932028
1830	20.0498	28413.9	0	?	0	520	0	Calculating F0: 29595.632149250134
1831	20.0607	28308.1	29703.1	-4.35	0.36	520	0	Hold. Current dF/F0 in tolerance range.(0.0 %)
1832	20.0717	28260.3	29654	-4.51	0.2	520	0	Hold. Current dF/F0 in tolerance range.(0.0 %)
1833	20.0826	28391.4	29792.6	-4.07	0.67	520	0	Hold. Current dF/F0 in tolerance range.(0.0 %)
1834	20.0936	28230.8	29625	-4.61	0.1	520	0	Hold. Current dF/F0 in tolerance range.(0.0 %)
1835	20.1045	28394.1	29797.5	-4.06	0.68	520	0	Hold. Current dF/F0 in tolerance range.(0.0 %)
1836	20.1155	28395.7	29800.1	-4.05	0.69	520	0	Hold. Current dF/F0 in tolerance range.(0.0 %)
1837	20.1264	28265.4	29664.4	-4.49	0.23	520	0	Hold. Current dF/F0 in tolerance range.(0.0 %)
1838	20.1374	28314.6	29717	-4.33	0.41	520	0	Hold. Current dF/F0 in tolerance range.(0.0 %)
1839	20.1483	28209.8	29608	-4.68	0.04	520	0	Hold. Current dF/F0 in tolerance range.(0.0 %)
1840	20.1593	28304.4	29708.3	-4.36	0.38	520	0	Hold. Current dF/F0 in tolerance range.(0.0 %)
1841	20.1702	28329.9	29736.1	-4.28	0.47	520	0	Hold. Current dF/F0 in tolerance range.(0.0 %)
1842	20.1812	28189	29589.3	-4.75	-0.02	520	0	Hold. Current dF/F0 in tolerance range.(0.0 %)
1843	20.1921	28275.5	29681.1	-4.46	0.29	520	0	Hold. Current dF/F0 in tolerance range.(0.0 %)
1844	20.2031	28211	29614.3	-4.68	0.06	520	0	Hold. Current dF/F0 in tolerance range.(0.0 %)
1845	20.214	28275.5	29683.1	-4.46	0.3	520	0	Hold. Current dF/F0 in tolerance range.(0.0 %)
1846	20.225	28226.8	29632.9	-4.63	0.13	520	0	Hold. Current dF/F0 in tolerance range.(0.0 %)
1847	20.2359	28275.7	29685.3	-4.46	0.3	520	0	Hold. Current dF/F0 in tolerance range.(0.0 %)
1848	20.2469	28330.1	29743.4	-4.28	0.5	520	0	Hold. Current dF/F0 in tolerance range.(0.0 %)
1849	20.2578	28296.3	29709	-4.39	0.38	520	0	Hold. Current dF/F0 in tolerance range.(0.0 %)
1850	20.2688	28377.2	29794.9	-4.12	0.67	520	0	Hold. Current dF/F0 in tolerance range.(0.0 %)
1851	20.2797	28212.1	29622.5	-4.67	0.09	520	0	Hold. Current dF/F0 in tolerance range.(0.0 %)
1852	20.2907	28278.5	29693.3	-4.45	0.33	520	0	Hold. Current dF/F0 in tolerance range.(0.0 %)
1853	20.3016	28395.4	29817.1	-4.06	0.75	520	0	Hold. Current dF/F0 in tolerance range.(0.0 %)
1854	20.3126	28277.3	29694.1	-4.45	0.33	520	0	Hold. Current dF/F0 in tolerance range.(0.0 %)
1855	20.3235	28228.4	29643.7	-4.62	0.16	520	0	Hold. Current dF/F0 in tolerance range.(0.0 %)
1856	20.3345	28267.7	29686	-4.49	0.31	520	0	Hold. Current dF/F0 in tolerance range.(0.0 %)
1857	20.3454	28264.4	29683.6	-4.5	0.3	520	0	Hold. Current dF/F0 in tolerance range.(0.0 %)
1858	20.3564	28369.1	29794.5	-4.14	0.67	520	0	Hold. Current dF/F0 in tolerance range.(0.0 %)
1859	20.3673	28402.9	29831	-4.03	0.8	520	0	Hold. Current dF/F0 in tolerance range.(0.0 %)
1860	20.3783	28342.8	29768.9	-4.23	0.59	520	0	Hold. Current dF/F0 in tolerance range.(0.0 %)
1861	20.3892	28333.1	29759.7	-4.27	0.55	520	0	Hold. Current dF/F0 in tolerance range.(0.0 %)
1862	20.4002	28237.2	29660	-4.59	0.22	520	0	Hold. Current dF/F0 in tolerance range.(0.0 %)
1863	20.4111	28277	29702.8	-4.46	0.36	520	0	Hold. Current dF/F0 in tolerance range.(0.0 %)
1864	20.4221	28370.4	29802	-4.14	0.7	520	0	Hold. Current dF/F0 in tolerance range.(0.0 %)
1865	20.433	28170	29592.5	-4.82	-0.01	520	0	Hold. Current dF/F0 in tolerance range.(0.0 %)
1866	20.444	28242	29669.1	-4.57	0.25	520	0	Hold. Current dF/F0 in tolerance range.(0.0 %)
1867	20.4549	28277.5	29707.4	-4.45	0.38	520	0	Hold. Current dF/F0 in tolerance range.(0.0 %)
1868	20.4659	28269	29699.6	-4.48	0.35	520	0	Hold. Current dF/F0 in tolerance range.(0.0 %)
1869	20.4768	28268.6	29700.1	-4.48	0.35	520	0	Hold. Current dF/F0 in tolerance range.(0.0 %)
1870	20.4878	28209	29638.5	-4.69	0.14	520	0	Hold. Current dF/F0 in tolerance range.(0.0 %)
1871	20.4987	28300.3	29735.4	-4.38	0.47	520	0	Hold. Current dF/F0 in tolerance range.(0.0 %)
1872	20.5097	28285.7	29721.1	-4.43	0.42	520	0	Hold. Current dF/F0 in tolerance range.(0.0 %)
1873	20.5206	28211.1	29643.8	-4.68	0.16	520	0	Hold. Current dF/F0 in tolerance range.(0.0 %)
1874	20.5316	28176.4	29608.3	-4.8	0.04	520	0	Hold. Current dF/F0 in tolerance range.(0.0 %)
1875	20.5425	28323.3	29763.7	-4.3	0.57	520	0	Hold. Current dF/F0 in tolerance range.(0.0 %)
1876	20.5535	28264.2	29702.7	-4.5	0.36	520	0	Hold. Current dF/F0 in tolerance range.(0.0 %)
1877	20.5644	28264.1	29703.6	-4.5	0.36	520	0	Hold. Current dF/F0 in tolerance range.(0.0 %)
1878	20.5754	28201	29638.2	-4.71	0.14	520	0	Hold. Current dF/F0 in tolerance range.(0.0 %)
1879	20.5863	28233.9	29673.8	-4.6	0.26	520	0	Hold. Current dF/F0 in tolerance range.(0.0 %)
1880	20.5973	28246.8	29688.3	-4.56	0.31	520	0	Hold. Current dF/F0 in tolerance range.(0.0 %)
1881	20.6082	28347.1	29794.8	-4.22	0.67	520	0	Hold. Current dF/F0 in tolerance range.(0.0 %)
1882	20.6192	28056.4	29490.3	-5.2	-0.36	520	-1	Current dF/F0 greater than holding dF/F0 (-1.0 %). --> Change wavelength by 0.0 nm
1883	20.6301	28286.6	29733.3	-4.42	0.47	520	-1	Hold. Current dF/F0 in tolerance range.(-1.0 %)
1884	20.6411	28355.8	29807.1	-4.19	0.71	520	-1	Current dF/F0 greater than holding dF/F0 (-1.0 %). --> Change wavelength by 1.0 nm
1885	20.652	28279.1	29727.4	-4.45	0.45	519	-1	Current dF/F0 greater than holding dF/F0 (-1.0 %). --> Change wavelength by 1.0 nm
1886	20.663	28421.3	29878	-3.97	0.95	518	-1	Current dF/F0 greater than holding dF/F0 (-1.0 %). --> Change wavelength by 1.0 nm
1887	20.6739	28337.2	29790.6	-4.25	0.66	517	-1	Current dF/F0 greater than holding dF/F0 (-1.0 %). --> Change wavelength by 1.0 nm
1888	20.6849	28355.4	29810.8	-4.19	0.73	516	-1	Current dF/F0 greater than holding dF/F0 (-1.0 %). --> Change wavelength by 1.0 nm
1889	20.6958	28314.2	29768.5	-4.33	0.58	515	-1	Current dF/F0 greater than holding dF/F0 (-1.0 %). --> Change wavelength by 1.0 nm
1890	20.7068	28332.3	29788.5	-4.27	0.65	514	-1	Current dF/F0 greater than holding dF/F0 (-1.0 %). --> Change wavelength by 1.0 nm
1891	20.7177	28222.3	29673.9	-4.64	0.26	513	-1	Current dF/F0 greater than holding dF/F0 (-1.0 %). --> Change wavelength by 1.0 nm
1892	20.7287	28323.9	29781.7	-4.3	0.63	512	-1	Current dF/F0 greater than holding dF/F0 (-1.0 %). --> Change wavelength by 1.0 nm
1893	20.7396	28233.5	29687.7	-4.6	0.31	511	-1	Current dF/F0 greater than holding dF/F0 (-1.0 %). --> Change wavelength by 1.0 nm
1894	20.7506	28316.4	29775.9	-4.32	0.61	510	-1	Current dF/F0 greater than holding dF/F0 (-1.0 %). --> Change wavelength by 1.0 nm
1895	20.7615	28433.8	29900.4	-3.93	1.03	509	-1	Current dF/F0 greater than holding dF/F0 (-1.0 %). --> Change wavelength by 2.0 nm
1896	20.7725	28154.1	29607.2	-4.87	0.04	507	-1	Current dF/F0 greater than holding dF/F0 (-1.0 %). --> Change wavelength by 1.0 nm
1897	20.7834	28018.4	29465.6	-5.33	-0.44	506	-1	Current dF/F0 greater than holding dF/F0 (-1.0 %). --> Change wavelength by 0.0 nm
1898	20.7944	28132.8	29586.9	-4.94	-0.03	506	-1	Hold. Current dF/F0 in tolerance range.(-1.0 %)
1899	20.8053	27976.2	29423.2	-5.47	-0.58	506	-1	Hold. Current dF/F0 in tolerance range.(-1.0 %)
1900	20.8163	28187.9	29646.9	-4.76	0.17	506	-1	Hold. Current dF/F0 in tolerance range.(-1.0 %)
1901	20.8272	28232.9	29695.3	-4.6	0.34	506	-1	Current dF/F0 greater than holding dF/F0 (-1.0 %). --> Change wavelength by 1.0 nm
1902	20.8382	28169.6	29629.8	-4.82	0.12	505	-1	Current dF/F0 greater than holding dF/F0 (-1.0 %). --> Change wavelength by 1.0 nm
1903	20.8491	28186.5	29648.5	-4.76	0.18	504	-1	Current dF/F0 greater than holding dF/F0 (-1.0 %). --> Change wavelength by 1.0 nm
1904	20.8601	28239.9	29705.7	-4.58	0.37	503	-1	Current dF/F0 greater than holding dF/F0 (-1.0 %). --> Change wavelength by 1.0 nm
1905	20.871	28238.8	29705.6	-4.58	0.37	502	-1	Current dF/F0 greater than holding dF/F0 (-1.0 %). --> Change wavelength by 1.0 nm
1906	20.882	28282	29752	-4.44	0.53	501	-1	Current dF/F0 greater than holding dF/F0 (-1.0 %). --> Change wavelength by 1.0 nm
1907	20.8929	28133.1	29596.4	-4.94	0	500	-1	Current dF/F0 greater than holding dF/F0 (-1.0 %). --> Change wavelength by 1.0 nm
1908	20.9039	28056.1	29516.4	-5.2	-0.27	499	-1	Current dF/F0 greater than holding dF/F0 (-1.0 %). --> Change wavelength by 0.0 nm
1909	20.9148	28108.9	29573.1	-5.02	-0.08	499	-1	Hold. Current dF/F0 in tolerance range.(-1.0 %)
1910	20.9258	28199.9	29669.8	-4.72	0.25	499	-1	Hold. Current dF/F0 in tolerance range.(-1.0 %)
1911	20.9367	28314.1	29791	-4.33	0.66	499	-1	Current dF/F0 greater than holding dF/F0 (-1.0 %). --> Change wavelength by 1.0 nm
1912	20.9477	28161.5	29631.4	-4.85	0.12	498	-1	Current dF/F0 greater than holding dF/F0 (-1.0 %). --> Change wavelength by 1.0 nm
1913	20.9586	28258.9	29735	-4.52	0.47	497	-1	Current dF/F0 greater than holding dF/F0 (-1.0 %). --> Change wavelength by 1.0 nm
1914	20.9696	28223.4	29698.6	-4.64	0.35	496	-1	Current dF/F0 greater than holding dF/F0 (-1.0 %). --> Change wavelength by 1.0 nm
1915	20.9805	28309.4	29790.2	-4.35	0.66	495	-1	Current dF/F0 greater than holding dF/F0 (-1.0 %). --> Change wavelength by 1.0 nm
1916	20.9915	28146	29619.2	-4.9	0.08	494	-1	Current dF/F0 greater than holding dF/F0 (-1.0 %). --> Change wavelength by 1.0 nm
1917	21.0024	28211	29688.7	-4.68	0.31	493	-1	Current dF/F0 greater than holding dF/F0 (-1.0 %). --> Change wavelength by 1.0 nm
1918	21.0134	28371.1	29858.2	-4.14	0.89	492	-1	Current dF/F0 greater than holding dF/F0 (-1.0 %). --> Change wavelength by 1.0 nm
1919	21.0243	28352.7	29839.8	-4.2	0.83	491	-1	Current dF/F0 greater than holding dF/F0 (-1.0 %). --> Change wavelength by 1.0 nm
1920	21.0353	28242.9	29725.4	-4.57	0.44	490	-1	Current dF/F0 greater than holding dF/F0 (-1.0 %). --> Change wavelength by 1.0 nm
1921	21.0462	28294	29780.1	-4.4	0.62	489	-1	Current dF/F0 greater than holding dF/F0 (-1.0 %). --> Change wavelength by 1.0 nm
1922	21.0572	28345.9	29835.8	-4.22	0.81	488	-1	Current dF/F0 greater than holding dF/F0 (-1.0 %). --> Change wavelength by 1.0 nm
1923	21.0681	28429.7	29925.1	-3.94	1.11	487	-1	Current dF/F0 greater than holding dF/F0 (-1.0 %). --> Change wavelength by 2.0 nm
1924	21.0791	28410.9	29906.3	-4	1.05	485	-1	Current dF/F0 greater than holding dF/F0 (-1.0 %). --> Change wavelength by 2.0 nm
1925	21.09	28376.7	29871.4	-4.12	0.93	483	-1	Current dF/F0 greater than holding dF/F0 (-1.0 %). --> Change wavelength by 1.0 nm
1926	21.101	28256.9	29746.2	-4.52	0.51	482	-1	Current dF/F0 greater than holding dF/F0 (-1.0 %). --> Change wavelength by 1.0 nm
1927	21.1119	28484.4	29986.8	-3.75	1.32	481	-1	Current dF/F0 greater than holding dF/F0 (-1.0 %). --> Change wavelength by 2.0 nm
1928	21.1229	28354	29850.5	-4.2	0.86	479	-1	Current dF/F0 greater than holding dF/F0 (-1.0 %). --> Change wavelength by 1.0 nm
1929	21.1338	28570.4	30079.5	-3.46	1.63	478	-1	Current dF/F0 greater than holding dF/F0 (-1.0 %). --> Change wavelength by 2.0 nm
1930	21.1448	28413.6	29915.4	-3.99	1.08	476	-1	Current dF/F0 greater than holding dF/F0 (-1.0 %). --> Change wavelength by 2.0 nm
1931	21.1557	28417	29920	-3.98	1.1	474	-1	Current dF/F0 greater than holding dF/F0 (-1.0 %). --> Change wavelength by 2.0 nm
1932	21.1667	28487.3	29995.1	-3.74	1.35	472	-1	Current dF/F0 greater than holding dF/F0 (-1.0 %). --> Change wavelength by 2.0 nm
1933	21.1776	28339.4	29840.4	-4.24	0.83	470	-1	Current dF/F0 greater than holding dF/F0 (-1.0 %). --> Change wavelength by 1.0 nm
1934	21.1886	28475.1	29984.3	-3.79	1.31	469	-1	Current dF/F0 greater than holding dF/F0 (-1.0 %). --> Change wavelength by 2.0 nm
1935	21.1995	28398.9	29905.1	-4.04	1.05	467	-1	Current dF/F0 greater than holding dF/F0 (-1.0 %). --> Change wavelength by 2.0 nm
1936	21.2105	28408.1	29915.8	-4.01	1.08	465	-1	Current dF/F0 greater than holding dF/F0 (-1.0 %). --> Change wavelength by 2.0 nm
1937	21.2214	28363.3	29869.7	-4.16	0.93	463	-1	Current dF/F0 greater than holding dF/F0 (-1.0 %). --> Change wavelength by 1.0 nm
1938	21.2324	28291.6	29795.3	-4.41	0.67	462	-1	Current dF/F0 greater than holding dF/F0 (-1.0 %). --> Change wavelength by 1.0 nm
1939	21.2433	28248.3	29750.7	-4.55	0.52	461	-1	Current dF/F0 greater than holding dF/F0 (-1.0 %). --> Change wavelength by 1.0 nm
1940	21.2543	28141.1	29638.9	-4.91	0.15	460	-1	Current dF/F0 greater than holding dF/F0 (-1.0 %). --> Change wavelength by 1.0 nm
1941	21.2652	28070	29565	-5.15	-0.1	459	-1	Current dF/F0 greater than holding dF/F0 (-1.0 %). --> Change wavelength by 0.0 nm
1942	21.2762	28159.7	29660.5	-4.85	0.22	459	-1	Hold. Current dF/F0 in tolerance range.(-1.0 %)
1943	21.2871	27921.1	29410.3	-5.66	-0.63	459	-1	Current dF/F0 greater than holding dF/F0 (-1.0 %). --> Change wavelength by 0.0 nm
1944	21.2981	27928.2	29418.8	-5.63	-0.6	459	-1	Hold. Current dF/F0 in tolerance range.(-1.0 %)
1945	21.309	28065.8	29564.7	-5.17	-0.1	459	-1	Hold. Current dF/F0 in tolerance range.(-1.0 %)
1946	21.32	27735.8	29218.1	-6.28	-1.28	459	-1	Hold. Current dF/F0 in tolerance range.(-1.0 %)
1947	21.3309	27970.9	29466.8	-5.49	-0.44	459	-1	Hold. Current dF/F0 in tolerance range.(-1.0 %)
1948	21.3419	27795.4	29282.9	-6.08	-1.06	459	-1	Hold. Current dF/F0 in tolerance range.(-1.0 %)
1949	21.3528	27878.2	29371.2	-5.8	-0.76	459	-1	Hold. Current dF/F0 in tolerance range.(-1.0 %)
1950	21.3638	27752.4	29239.7	-6.23	-1.2	459	-1	Hold. Current dF/F0 in tolerance range.(-1.0 %)
1951	21.3747	27773.6	29263	-6.16	-1.12	459	-1	Hold. Current dF/F0 in tolerance range.(-1.0 %)
1952	21.3857	28012.7	29516	-5.35	-0.27	459	-1	Hold. Current dF/F0 in tolerance range.(-1.0 %)
1953	21.3966	27851.2	29346.9	-5.89	-0.84	459	-1	Hold. Current dF/F0 in tolerance range.(-1.0 %)
1954	21.4076	27824.4	29319.7	-5.98	-0.93	459	-1	Hold. Current dF/F0 in tolerance range.(-1.0 %)
1955	21.4185	27857	29355	-5.87	-0.81	459	-1	Hold. Current dF/F0 in tolerance range.(-1.0 %)
1956	21.4295	27921.6	29424.2	-5.66	-0.58	459	-1	Hold. Current dF/F0 in tolerance range.(-1.0 %)
1957	21.4404	27870.4	29371.2	-5.83	-0.76	459	-1	Hold. Current dF/F0 in tolerance range.(-1.0 %)
1958	21.4514	27809.3	29307.9	-6.04	-0.97	459	-1	Hold. Current dF/F0 in tolerance range.(-1.0 %)
1959	21.4623	27923.8	29429.5	-5.65	-0.56	459	-1	Hold. Current dF/F0 in tolerance range.(-1.0 %)
1960	21.4733	27944.4	29452.4	-5.58	-0.48	459	-1	Hold. Current dF/F0 in tolerance range.(-1.0 %)
1961	21.4842	27839.6	29342.9	-5.93	-0.85	459	-1	Hold. Current dF/F0 in tolerance range.(-1.0 %)
1962	21.4952	27974.9	29486.5	-5.48	-0.37	459	-1	Hold. Current dF/F0 in tolerance range.(-1.0 %)
1963	21.5061	28003.1	29517.3	-5.38	-0.26	459	-2	Current dF/F0 greater than holding dF/F0 (-2.0 %). --> Change wavelength by 1.0 nm
1964	21.5171	27927	29438.1	-5.64	-0.53	458	-2	Current dF/F0 greater than holding dF/F0 (-2.0 %). --> Change wavelength by 1.0 nm
1965	21.528	27894.8	29405.2	-5.75	-0.64	457	-2	Current dF/F0 greater than holding dF/F0 (-2.0 %). --> Change wavelength by 1.0 nm
1966	21.539	27930.1	29443.5	-5.63	-0.51	456	-2	Current dF/F0 greater than holding dF/F0 (-2.0 %). --> Change wavelength by 1.0 nm
1967	21.5499	27858.9	29369.5	-5.87	-0.76	455	-2	Current dF/F0 greater than holding dF/F0 (-2.0 %). --> Change wavelength by 1.0 nm
1968	21.5609	27965.6	29483	-5.51	-0.38	454	-2	Current dF/F0 greater than holding dF/F0 (-2.0 %). --> Change wavelength by 1.0 nm
1969	21.5718	27915.2	29430.9	-5.68	-0.56	453	-2	Current dF/F0 greater than holding dF/F0 (-2.0 %). --> Change wavelength by 1.0 nm
1970	21.5828	27876.2	29390.8	-5.81	-0.69	452	-2	Current dF/F0 greater than holding dF/F0 (-2.0 %). --> Change wavelength by 1.0 nm
1971	21.5937	27652.8	29156.3	-6.56	-1.48	451	-2	Current dF/F0 greater than holding dF/F0 (-2.0 %). --> Change wavelength by 0.0 nm
1972	21.6047	27597.6	29099.1	-6.75	-1.68	451	-2	Hold. Current dF/F0 in tolerance range.(-2.0 %)
1973	21.6156	27400.2	28892	-7.42	-2.38	451	-2	Hold. Current dF/F0 in tolerance range.(-2.0 %)
1974	21.6266	27444	28939.2	-7.27	-2.22	451	-2	Hold. Current dF/F0 in tolerance range.(-2.0 %)
1975	21.6375	27603.4	29108.3	-6.73	-1.65	451	-2	Hold. Current dF/F0 in tolerance range.(-2.0 %)
1976	21.6485	27370.7	28864	-7.52	-2.47	451	-2	Hold. Current dF/F0 in tolerance range.(-2.0 %)
1977	21.6594	27307.5	28798.3	-7.73	-2.69	451	-2	Hold. Current dF/F0 in tolerance range.(-2.0 %)
1978	21.6704	27384	28880	-7.47	-2.42	451	-2	Hold. Current dF/F0 in tolerance range.(-2.0 %)
1979	21.6813	27403.9	28902	-7.41	-2.34	451	-2	Hold. Current dF/F0 in tolerance range.(-2.0 %)
1980	21.6923	27428.2	28928.6	-7.32	-2.25	451	-2	Hold. Current dF/F0 in tolerance range.(-2.0 %)
1981	21.7033	27470.7	28974.5	-7.18	-2.1	451	-2	Hold. Current dF/F0 in tolerance range.(-2.0 %)
1982	21.7142	27375.2	28874.8	-7.5	-2.44	451	-2	Hold. Current dF/F0 in tolerance range.(-2.0 %)
1983	21.7252	27489.6	28996.5	-7.12	-2.02	451	-2	Hold. Current dF/F0 in tolerance range.(-2.0 %)
1984	21.7361	27422.9	28927.2	-7.34	-2.26	451	-2	Hold. Current dF/F0 in tolerance range.(-2.0 %)
1985	21.7471	27474.2	28982.3	-7.17	-2.07	451	-2	Hold. Current dF/F0 in tolerance range.(-2.0 %)
1986	21.758	27567.9	29082.1	-6.85	-1.74	451	-2	Hold. Current dF/F0 in tolerance range.(-2.0 %)
1987	21.769	27573.4	29089	-6.83	-1.71	451	-2	Hold. Current dF/F0 in tolerance range.(-2.0 %)
1988	21.7799	27386.6	28893	-7.46	-2.37	451	-2	Hold. Current dF/F0 in tolerance range.(-2.0 %)
1989	21.7909	27366.2	28872.5	-7.53	-2.44	451	-2	Hold. Current dF/F0 in tolerance range.(-2.0 %)
1990	21.8018	27584.4	29103.8	-6.8	-1.66	451	-2	Hold. Current dF/F0 in tolerance range.(-2.0 %)
1991	21.8128	27498.1	29013.7	-7.09	-1.97	451	-2	Hold. Current dF/F0 in tolerance range.(-2.0 %)
1992	21.8237	27602.9	29125.3	-6.73	-1.59	451	-2	Hold. Current dF/F0 in tolerance range.(-2.0 %)
1993	21.8347	27452.3	28967.4	-7.24	-2.12	451	-2	Hold. Current dF/F0 in tolerance range.(-2.0 %)
1994	21.8456	27474	28991.4	-7.17	-2.04	451	-2	Hold. Current dF/F0 in tolerance range.(-2.0 %)
1995	21.8566	27572.4	29096.2	-6.84	-1.69	451	-2	Hold. Current dF/F0 in tolerance range.(-2.0 %)
[truncated: 834 more rows]

## Sheet: ED Figure 9G
Title: 2 Date: 2022/08/03 16:34
Parameters: Exposure time: 10 ms Binning: 4x4
Bleaching correction function: exp. offset = 373.64 * exp(-0.0050 * x) + 8037.55 R^2: 0.8043 Video duration: 318.64 s Framerate: 99.89
# Measurement	Time	F	F_bleach_correct	dF/F0	dF/F0_bleach_correct	Wavelength	Holding DF/F0	Info
0	0.01	8277.44	0	?	0	525	0	Calibration
1	0.02	8245.07	0	?	0	525	0	Calibration
2	0.03	8264.85	0	?	0	525	0	Calibration
3	0.04	8312.25	0	?	0	525	0	Calibration
4	0.0501	8357.94	0	?	0	525	0	Calibration
5	0.0601	8373.22	0	?	0	525	0	Calibration
6	0.0701	8305.01	0	?	0	525	0	Calibration
7	0.0801	8318.69	0	?	0	525	0	Calibration
8	0.0901	8315.9	0	?	0	525	0	Calibration
9	0.1001	8359.61	0	?	0	525	0	Calibration
10	0.1101	8366.9	0	?	0	525	0	Calibration
11	0.1201	8375.94	0	?	0	525	0	Calibration
12	0.1301	8348.86	0	?	0	525	0	Calibration
13	0.1402	8335.7	0	?	0	525	0	Calibration
14	0.1502	8359.01	0	?	0	525	0	Calibration
15	0.1602	8331.98	0	?	0	525	0	Calibration
16	0.1702	8341.63	0	?	0	525	0	Calibration
17	0.1802	8326.29	0	?	0	525	0	Calibration
18	0.1902	8340.43	0	?	0	525	0	Calibration
19	0.2002	8325.49	0	?	0	525	0	Calibration
20	0.2102	8306.01	0	?	0	525	0	Calibration
21	0.2202	8341.01	0	?	0	525	0	Calibration
22	0.2302	8322.15	0	?	0	525	0	Calibration
23	0.2403	8295.21	0	?	0	525	0	Calibration
24	0.2503	8304.09	0	?	0	525	0	Calibration
25	0.2603	8316.62	0	?	0	525	0	Calibration
26	0.2703	8308.83	0	?	0	525	0	Calibration
27	0.2803	8322.82	0	?	0	525	0	Calibration
28	0.2903	8327.44	0	?	0	525	0	Calibration
29	0.3003	8341.14	0	?	0	525	0	Calibration
30	0.3103	8285.71	0	?	0	525	0	Calibration
31	0.3203	8271.09	0	?	0	525	0	Calibration
32	0.3304	8320.54	0	?	0	525	0	Calibration
33	0.3404	8348.55	0	?	0	525	0	Calibration
34	0.3504	8309.99	0	?	0	525	0	Calibration
35	0.3604	8302.02	0	?	0	525	0	Calibration
36	0.3704	8300.9	0	?	0	525	0	Calibration
37	0.3804	8302.57	0	?	0	525	0	Calibration
38	0.3904	8286.16	0	?	0	525	0	Calibration
39	0.4004	8272.31	0	?	0	525	0	Calibration
40	0.4104	8228.22	0	?	0	525	0	Calibration
41	0.4205	8242.6	0	?	0	525	0	Calibration
42	0.4305	8253.82	0	?	0	525	0	Calibration
43	0.4405	8291.73	0	?	0	525	0	Calibration
44	0.4505	8340.66	0	?	0	525	0	Calibration
45	0.4605	8316.77	0	?	0	525	0	Calibration
46	0.4705	8249.2	0	?	0	525	0	Calibration
47	0.4805	8249.25	0	?	0	525	0	Calibration
48	0.4905	8264.52	0	?	0	525	0	Calibration
49	0.5005	8239.5	0	?	0	525	0	Calibration
50	0.5105	8226.22	0	?	0	525	0	Calibration
51	0.5206	8233.17	0	?	0	525	0	Calibration
52	0.5306	8219.51	0	?	0	525	0	Calibration
53	0.5406	8240.84	0	?	0	525	0	Calibration
54	0.5506	8228.54	0	?	0	525	0	Calibration
55	0.5606	8305.49	0	?	0	525	0	Calibration
56	0.5706	8310.82	0	?	0	525	0	Calibration
57	0.5806	8304.17	0	?	0	525	0	Calibration
58	0.5906	8313.11	0	?	0	525	0	Calibration
59	0.6006	8292.53	0	?	0	525	0	Calibration
60	0.6107	8278.4	0	?	0	525	0	Calibration
61	0.6207	8274.43	0	?	0	525	0	Calibration
62	0.6307	8227.93	0	?	0	525	0	Calibration
63	0.6407	8208.48	0	?	0	525	0	Calibration
64	0.6507	8198.63	0	?	0	525	0	Calibration
65	0.6607	8222.69	0	?	0	525	0	Calibration
66	0.6707	8247.07	0	?	0	525	0	Calibration
67	0.6807	8312.68	0	?	0	525	0	Calibration
68	0.6907	8310.63	0	?	0	525	0	Calibration
69	0.7008	8264.81	0	?	0	525	0	Calibration
70	0.7108	8305.45	0	?	0	525	0	Calibration
71	0.7208	8359.11	0	?	0	525	0	Calibration
72	0.7308	8344.02	0	?	0	525	0	Calibration
73	0.7408	8310.22	0	?	0	525	0	Calibration
74	0.7508	8293.02	0	?	0	525	0	Calibration
75	0.7608	8311.39	0	?	0	525	0	Calibration
76	0.7708	8333.39	0	?	0	525	0	Calibration
77	0.7808	8313.46	0	?	0	525	0	Calibration
78	0.7909	8345.31	0	?	0	525	0	Calibration
79	0.8009	8355.02	0	?	0	525	0	Calibration
80	0.8109	8302.22	0	?	0	525	0	Calibration
81	0.8209	8346.99	0	?	0	525	0	Calibration
82	0.8309	8291.65	0	?	0	525	0	Calibration
83	0.8409	8295.81	0	?	0	525	0	Calibration
84	0.8509	8271.45	0	?	0	525	0	Calibration
85	0.8609	8277.06	0	?	0	525	0	Calibration
86	0.8709	8311.34	0	?	0	525	0	Calibration
87	0.8809	8310.12	0	?	0	525	0	Calibration
88	0.891	8319.31	0	?	0	525	0	Calibration
89	0.901	8321.7	0	?	0	525	0	Calibration
90	0.911	8310.75	0	?	0	525	0	Calibration
91	0.921	8273.17	0	?	0	525	0	Calibration
92	0.931	8251.73	0	?	0	525	0	Calibration
93	0.941	8247.66	0	?	0	525	0	Calibration
94	0.951	8215.68	0	?	0	525	0	Calibration
95	0.961	8233.55	0	?	0	525	0	Calibration
96	0.971	8243.73	0	?	0	525	0	Calibration
97	0.9811	8257.92	0	?	0	525	0	Calibration
98	0.9911	8252.19	0	?	0	525	0	Calibration
99	1.0011	8263.22	0	?	0	525	0	Calibration
100	1.0111	8306	0	?	0	525	0	Calibration
101	1.0211	8296.04	0	?	0	525	0	Calibration
102	1.0311	8255.66	0	?	0	525	0	Calibration
103	1.0411	8241.34	0	?	0	525	0	Calibration
104	1.0511	8305.83	0	?	0	525	0	Calibration
105	1.0611	8304.79	0	?	0	525	0	Calibration
106	1.0712	8326.07	0	?	0	525	0	Calibration
107	1.0812	8318.01	0	?	0	525	0	Calibration
108	1.0912	8291.51	0	?	0	525	0	Calibration
109	1.1012	8301.61	0	?	0	525	0	Calibration
110	1.1112	8263.93	0	?	0	525	0	Calibration
111	1.1212	8277.1	0	?	0	525	0	Calibration
112	1.1312	8277.82	0	?	0	525	0	Calibration
113	1.1412	8264.45	0	?	0	525	0	Calibration
114	1.1512	8257.66	0	?	0	525	0	Calibration
115	1.1613	8256.32	0	?	0	525	0	Calibration
116	1.1713	8227.49	0	?	0	525	0	Calibration
117	1.1813	8231.8	0	?	0	525	0	Calibration
118	1.1913	8262.73	0	?	0	525	0	Calibration
119	1.2013	8289.14	0	?	0	525	0	Calibration
120	1.2113	8295.51	0	?	0	525	0	Calibration
121	1.2213	8334.97	0	?	0	525	0	Calibration
122	1.2313	8370.76	0	?	0	525	0	Calibration
123	1.2413	8288.68	0	?	0	525	0	Calibration
124	1.2513	8249.33	0	?	0	525	0	Calibration
125	1.2614	8273.22	0	?	0	525	0	Calibration
126	1.2714	8257.9	0	?	0	525	0	Calibration
127	1.2814	8239.54	0	?	0	525	0	Calibration
128	1.2914	8223.27	0	?	0	525	0	Calibration
129	1.3014	8260.84	0	?	0	525	0	Calibration
130	1.3114	8365.42	0	?	0	525	0	Calibration
131	1.3214	8338.45	0	?	0	525	0	Calibration
132	1.3314	8277.44	0	?	0	525	0	Calibration
133	1.3414	8253.63	0	?	0	525	0	Calibration
134	1.3515	8200.92	0	?	0	525	0	Calibration
135	1.3615	8225.42	0	?	0	525	0	Calibration
136	1.3715	8262.16	0	?	0	525	0	Calibration
137	1.3815	8253.97	0	?	0	525	0	Calibration
138	1.3915	8246.27	0	?	0	525	0	Calibration
139	1.4015	8235.7	0	?	0	525	0	Calibration
140	1.4115	8251.14	0	?	0	525	0	Calibration
141	1.4215	8251.25	0	?	0	525	0	Calibration
142	1.4315	8247.7	0	?	0	525	0	Calibration
143	1.4416	8284.08	0	?	0	525	0	Calibration
144	1.4516	8262.78	0	?	0	525	0	Calibration
145	1.4616	8294.1	0	?	0	525	0	Calibration
146	1.4716	8319.47	0	?	0	525	0	Calibration
147	1.4816	8290.38	0	?	0	525	0	Calibration
148	1.4916	8281.89	0	?	0	525	0	Calibration
149	1.5016	8259.48	0	?	0	525	0	Calibration
150	1.5116	8265.72	0	?	0	525	0	Calibration
151	1.5216	8187.44	0	?	0	525	0	Calibration
152	1.5316	8193.87	0	?	0	525	0	Calibration
153	1.5417	8232.95	0	?	0	525	0	Calibration
154	1.5517	8194.19	0	?	0	525	0	Calibration
155	1.5617	8210.89	0	?	0	525	0	Calibration
156	1.5717	8223.31	0	?	0	525	0	Calibration
157	1.5817	8292.17	0	?	0	525	0	Calibration
158	1.5917	8260.07	0	?	0	525	0	Calibration
159	1.6017	8256.91	0	?	0	525	0	Calibration
160	1.6117	8338.72	0	?	0	525	0	Calibration
161	1.6217	8367.77	0	?	0	525	0	Calibration
162	1.6318	8320.77	0	?	0	525	0	Calibration
163	1.6418	8267.25	0	?	0	525	0	Calibration
164	1.6518	8262.73	0	?	0	525	0	Calibration
165	1.6618	8223.38	0	?	0	525	0	Calibration
166	1.6718	8277.31	0	?	0	525	0	Calibration
167	1.6818	8303.93	0	?	0	525	0	Calibration
168	1.6918	8317.5	0	?	0	525	0	Calibration
169	1.7018	8276.08	0	?	0	525	0	Calibration
170	1.7118	8254.61	0	?	0	525	0	Calibration
171	1.7219	8302.17	0	?	0	525	0	Calibration
172	1.7319	8344.27	0	?	0	525	0	Calibration
173	1.7419	8296.74	0	?	0	525	0	Calibration
174	1.7519	8235.46	0	?	0	525	0	Calibration
175	1.7619	8202.8	0	?	0	525	0	Calibration
176	1.7719	8195.81	0	?	0	525	0	Calibration
177	1.7819	8264.87	0	?	0	525	0	Calibration
178	1.7919	8267.59	0	?	0	525	0	Calibration
179	1.8019	8250.4	0	?	0	525	0	Calibration
180	1.812	8215.75	0	?	0	525	0	Calibration
181	1.822	8216.38	0	?	0	525	0	Calibration
182	1.832	8212.67	0	?	0	525	0	Calibration
183	1.842	8220.55	0	?	0	525	0	Calibration
184	1.852	8231.14	0	?	0	525	0	Calibration
185	1.862	8232.17	0	?	0	525	0	Calibration
186	1.872	8204.17	0	?	0	525	0	Calibration
187	1.882	8232.92	0	?	0	525	0	Calibration
188	1.892	8219.22	0	?	0	525	0	Calibration
189	1.902	8149.19	0	?	0	525	0	Calibration
190	1.9121	8173.11	0	?	0	525	0	Calibration
191	1.9221	8224.05	0	?	0	525	0	Calibration
192	1.9321	8271.66	0	?	0	525	0	Calibration
193	1.9421	8256.53	0	?	0	525	0	Calibration
194	1.9521	8274.69	0	?	0	525	0	Calibration
195	1.9621	8279.43	0	?	0	525	0	Calibration
196	1.9721	8247.68	0	?	0	525	0	Calibration
197	1.9821	8201.32	0	?	0	525	0	Calibration
198	1.9921	8186.44	0	?	0	525	0	Calibration
199	2.0022	8211.79	0	?	0	525	0	Calibration
200	2.0122	8239.18	0	?	0	525	0	Calibration
201	2.0222	8212.02	0	?	0	525	0	Calibration
202	2.0322	8252.07	0	?	0	525	0	Calibration
203	2.0422	8278.53	0	?	0	525	0	Calibration
204	2.0522	8275.61	0	?	0	525	0	Calibration
205	2.0622	8268.52	0	?	0	525	0	Calibration
206	2.0722	8235.89	0	?	0	525	0	Calibration
207	2.0822	8189.25	0	?	0	525	0	Calibration
208	2.0923	8177.67	0	?	0	525	0	Calibration
209	2.1023	8192.71	0	?	0	525	0	Calibration
210	2.1123	8212.7	0	?	0	525	0	Calibration
211	2.1223	8220.36	0	?	0	525	0	Calibration
212	2.1323	8228.91	0	?	0	525	0	Calibration
213	2.1423	8239.17	0	?	0	525	0	Calibration
214	2.1523	8174.95	0	?	0	525	0	Calibration
215	2.1623	8238.01	0	?	0	525	0	Calibration
216	2.1723	8290.57	0	?	0	525	0	Calibration
217	2.1823	8263.02	0	?	0	525	0	Calibration
218	2.1924	8278.46	0	?	0	525	0	Calibration
219	2.2024	8316.46	0	?	0	525	0	Calibration
220	2.2124	8326.99	0	?	0	525	0	Calibration
221	2.2224	8271.71	0	?	0	525	0	Calibration
222	2.2324	8246.47	0	?	0	525	0	Calibration
223	2.2424	8251.51	0	?	0	525	0	Calibration
224	2.2524	8260.2	0	?	0	525	0	Calibration
225	2.2624	8199.74	0	?	0	525	0	Calibration
226	2.2724	8244.59	0	?	0	525	0	Calibration
227	2.2825	8240.94	0	?	0	525	0	Calibration
228	2.2925	8228.29	0	?	0	525	0	Calibration
229	2.3025	8209.41	0	?	0	525	0	Calibration
230	2.3125	8183.63	0	?	0	525	0	Calibration
231	2.3225	8161.13	0	?	0	525	0	Calibration
232	2.3325	8170.16	0	?	0	525	0	Calibration
233	2.3425	8167.05	0	?	0	525	0	Calibration
234	2.3525	8167.18	0	?	0	525	0	Calibration
235	2.3625	8173.34	0	?	0	525	0	Calibration
236	2.3726	8155.92	0	?	0	525	0	Calibration
237	2.3826	8174.7	0	?	0	525	0	Calibration
238	2.3926	8220.02	0	?	0	525	0	Calibration
239	2.4026	8195.99	0	?	0	525	0	Calibration
240	2.4126	8223.17	0	?	0	525	0	Calibration
241	2.4226	8269.51	0	?	0	525	0	Calibration
242	2.4326	8244.65	0	?	0	525	0	Calibration
243	2.4426	8249.7	0	?	0	525	0	Calibration
244	2.4526	8189.23	0	?	0	525	0	Calibration
245	2.4627	8161.5	0	?	0	525	0	Calibration
246	2.4727	8165.45	0	?	0	525	0	Calibration
247	2.4827	8152.67	0	?	0	525	0	Calibration
248	2.4927	8175.6	0	?	0	525	0	Calibration
249	2.5027	8186.24	0	?	0	525	0	Calibration
250	2.5127	8229.34	0	?	0	525	0	Calibration
251	2.5227	8244.51	0	?	0	525	0	Calibration
252	2.5327	8218.06	0	?	0	525	0	Calibration
253	2.5427	8229.86	0	?	0	525	0	Calibration
254	2.5527	8177.97	0	?	0	525	0	Calibration
255	2.5628	8205.3	0	?	0	525	0	Calibration
256	2.5728	8192.18	0	?	0	525	0	Calibration
257	2.5828	8261.85	0	?	0	525	0	Calibration
258	2.5928	8209.72	0	?	0	525	0	Calibration
259	2.6028	8200.48	0	?	0	525	0	Calibration
260	2.6128	8197.23	0	?	0	525	0	Calibration
261	2.6228	8186.85	0	?	0	525	0	Calibration
262	2.6328	8276.01	0	?	0	525	0	Calibration
263	2.6428	8249.19	0	?	0	525	0	Calibration
264	2.6529	8251.17	0	?	0	525	0	Calibration
265	2.6629	8230.74	0	?	0	525	0	Calibration
266	2.6729	8219.39	0	?	0	525	0	Calibration
267	2.6829	8222.26	0	?	0	525	0	Calibration
268	2.6929	8230.05	0	?	0	525	0	Calibration
269	2.7029	8210.69	0	?	0	525	0	Calibration
270	2.7129	8184.32	0	?	0	525	0	Calibration
271	2.7229	8199.29	0	?	0	525	0	Calibration
272	2.7329	8207.38	0	?	0	525	0	Calibration
273	2.743	8188.69	0	?	0	525	0	Calibration
274	2.753	8239.96	0	?	0	525	0	Calibration
275	2.763	8235.96	0	?	0	525	0	Calibration
276	2.773	8165.99	0	?	0	525	0	Calibration
277	2.783	8173.93	0	?	0	525	0	Calibration
278	2.793	8183.1	0	?	0	525	0	Calibration
279	2.803	8197.6	0	?	0	525	0	Calibration
280	2.813	8226	0	?	0	525	0	Calibration
281	2.823	8263.3	0	?	0	525	0	Calibration
282	2.833	8246.92	0	?	0	525	0	Calibration
283	2.8431	8188.35	0	?	0	525	0	Calibration
284	2.8531	8234.15	0	?	0	525	0	Calibration
285	2.8631	8233.82	0	?	0	525	0	Calibration
286	2.8731	8172.26	0	?	0	525	0	Calibration
287	2.8831	8163.22	0	?	0	525	0	Calibration
288	2.8931	8154.18	0	?	0	525	0	Calibration
289	2.9031	8121.61	0	?	0	525	0	Calibration
290	2.9131	8093.84	0	?	0	525	0	Calibration
291	2.9231	8084.46	0	?	0	525	0	Calibration
292	2.9332	8155.84	0	?	0	525	0	Calibration
293	2.9432	8071.43	0	?	0	525	0	Calibration
294	2.9532	8097.5	0	?	0	525	0	Calibration
295	2.9632	8136.59	0	?	0	525	0	Calibration
296	2.9732	8180.92	0	?	0	525	0	Calibration
297	2.9832	8229.13	0	?	0	525	0	Calibration
298	2.9932	8258.12	0	?	0	525	0	Calibration
299	3.0032	8241.59	0	?	0	525	0	Calibration
300	3.0132	8170.38	0	?	0	525	0	Calibration
301	3.0233	8145.29	0	?	0	525	0	Calibration
302	3.0333	8209.25	0	?	0	525	0	Calibration
303	3.0433	8178.3	0	?	0	525	0	Calibration
304	3.0533	8232.99	0	?	0	525	0	Calibration
305	3.0633	8193.38	0	?	0	525	0	Calibration
306	3.0733	8104.79	0	?	0	525	0	Calibration
307	3.0833	8111.8	0	?	0	525	0	Calibration
308	3.0933	8147.42	0	?	0	525	0	Calibration
309	3.1033	8164.28	0	?	0	525	0	Calibration
310	3.1134	8171.69	0	?	0	525	0	Calibration
311	3.1234	8149.52	0	?	0	525	0	Calibration
312	3.1334	8157.33	0	?	0	525	0	Calibration
313	3.1434	8157.08	0	?	0	525	0	Calibration
314	3.1534	8142.68	0	?	0	525	0	Calibration
315	3.1634	8139.21	0	?	0	525	0	Calibration
316	3.1734	8158.92	0	?	0	525	0	Calibration
317	3.1834	8166.42	0	?	0	525	0	Calibration
318	3.1934	8208.22	0	?	0	525	0	Calibration
319	3.2034	8153.83	0	?	0	525	0	Calibration
320	3.2135	8128.44	0	?	0	525	0	Calibration
321	3.2235	8173.4	0	?	0	525	0	Calibration
322	3.2335	8138.85	0	?	0	525	0	Calibration
323	3.2435	8144.67	0	?	0	525	0	Calibration
324	3.2535	8108.48	0	?	0	525	0	Calibration
325	3.2635	8123.61	0	?	0	525	0	Calibration
326	3.2735	8178.91	0	?	0	525	0	Calibration
327	3.2835	8130.82	0	?	0	525	0	Calibration
328	3.2935	8148.92	0	?	0	525	0	Calibration
329	3.3036	8182.02	0	?	0	525	0	Calibration
330	3.3136	8188.74	0	?	0	525	0	Calibration
331	3.3236	8186.9	0	?	0	525	0	Calibration
332	3.3336	8121.47	0	?	0	525	0	Calibration
333	3.3436	8161.86	0	?	0	525	0	Calibration
334	3.3536	8169.38	0	?	0	525	0	Calibration
335	3.3636	8236.08	0	?	0	525	0	Calibration
336	3.3736	8232.5	0	?	0	525	0	Calibration
337	3.3836	8200.51	0	?	0	525	0	Calibration
338	3.3937	8210.54	0	?	0	525	0	Calibration
339	3.4037	8169.21	0	?	0	525	0	Calibration
340	3.4137	8174.33	0	?	0	525	0	Calibration
341	3.4237	8201.67	0	?	0	525	0	Calibration
342	3.4337	8222.04	0	?	0	525	0	Calibration
343	3.4437	8170.92	0	?	0	525	0	Calibration
344	3.4537	8197.48	0	?	0	525	0	Calibration
345	3.4637	8177.75	0	?	0	525	0	Calibration
346	3.4737	8162.45	0	?	0	525	0	Calibration
347	3.4838	8194.04	0	?	0	525	0	Calibration
348	3.4938	8178.89	0	?	0	525	0	Calibration
349	3.5038	8162.17	0	?	0	525	0	Calibration
350	3.5138	8179.13	0	?	0	525	0	Calibration
351	3.5238	8164.14	0	?	0	525	0	Calibration
352	3.5338	8159.1	0	?	0	525	0	Calibration
353	3.5438	8109.85	0	?	0	525	0	Calibration
354	3.5538	8118.87	0	?	0	525	0	Calibration
355	3.5638	8122.41	0	?	0	525	0	Calibration
356	3.5738	8098.04	0	?	0	525	0	Calibration
357	3.5839	8107.69	0	?	0	525	0	Calibration
358	3.5939	8081.93	0	?	0	525	0	Calibration
359	3.6039	8103.96	0	?	0	525	0	Calibration
360	3.6139	8142.5	0	?	0	525	0	Calibration
361	3.6239	8185.87	0	?	0	525	0	Calibration
362	3.6339	8221.12	0	?	0	525	0	Calibration
363	3.6439	8227.83	0	?	0	525	0	Calibration
364	3.6539	8208.65	0	?	0	525	0	Calibration
365	3.6639	8164.67	0	?	0	525	0	Calibration
366	3.674	8141.69	0	?	0	525	0	Calibration
367	3.684	8114.2	0	?	0	525	0	Calibration
368	3.694	8069.43	0	?	0	525	0	Calibration
369	3.704	8118.1	0	?	0	525	0	Calibration
370	3.714	8087.23	0	?	0	525	0	Calibration
371	3.724	8127.19	0	?	0	525	0	Calibration
372	3.734	8043.66	0	?	0	525	0	Calibration
373	3.744	8104.95	0	?	0	525	0	Calibration
374	3.754	8117.71	0	?	0	525	0	Calibration
375	3.7641	8085.02	0	?	0	525	0	Calibration
376	3.7741	8109.64	0	?	0	525	0	Calibration
377	3.7841	8132.01	0	?	0	525	0	Calibration
378	3.7941	8151.46	0	?	0	525	0	Calibration
379	3.8041	8166.55	0	?	0	525	0	Calibration
380	3.8141	8174.54	0	?	0	525	0	Calibration
381	3.8241	8141.3	0	?	0	525	0	Calibration
382	3.8341	8128.92	0	?	0	525	0	Calibration
383	3.8441	8134.69	0	?	0	525	0	Calibration
384	3.8541	8129.19	0	?	0	525	0	Calibration
385	3.8642	8130.27	0	?	0	525	0	Calibration
386	3.8742	8107.79	0	?	0	525	0	Calibration
387	3.8842	8072.04	0	?	0	525	0	Calibration
388	3.8942	8074	0	?	0	525	0	Calibration
389	3.9042	8052.21	0	?	0	525	0	Calibration
390	3.9142	8034.72	0	?	0	525	0	Calibration
391	3.9242	8074.01	0	?	0	525	0	Calibration
392	3.9342	8053.79	0	?	0	525	0	Calibration
393	3.9442	8106.99	0	?	0	525	0	Calibration
394	3.9543	8133.41	0	?	0	525	0	Calibration
395	3.9643	8118.41	0	?	0	525	0	Calibration
396	3.9743	8075.44	0	?	0	525	0	Calibration
397	3.9843	8065.95	0	?	0	525	0	Calibration
398	3.9943	8104.13	0	?	0	525	0	Calibration
399	4.0043	8160.29	0	?	0	525	0	Calibration
400	4.0143	8151.89	0	?	0	525	0	Calibration
401	4.0243	8130.35	0	?	0	525	0	Calibration
402	4.0343	8165.56	0	?	0	525	0	Calibration
403	4.0444	8198.69	0	?	0	525	0	Calibration
404	4.0544	8181.96	0	?	0	525	0	Calibration
405	4.0644	8057.4	0	?	0	525	0	Calibration
406	4.0744	8050.45	0	?	0	525	0	Calibration
407	4.0844	8040.28	0	?	0	525	0	Calibration
408	4.0944	8051.98	0	?	0	525	0	Calibration
409	4.1044	8072.5	0	?	0	525	0	Calibration
410	4.1144	8141.83	0	?	0	525	0	Calibration
411	4.1244	8139.19	0	?	0	525	0	Calibration
412	4.1345	8175.38	0	?	0	525	0	Calibration
413	4.1445	8231.7	0	?	0	525	0	Calibration
414	4.1545	8221.4	0	?	0	525	0	Calibration
415	4.1645	8145.16	0	?	0	525	0	Calibration
416	4.1745	8105.27	0	?	0	525	0	Calibration
417	4.1845	8137.53	0	?	0	525	0	Calibration
418	4.1945	8180.3	0	?	0	525	0	Calibration
419	4.2045	8134.65	0	?	0	525	0	Calibration
420	4.2145	8107.5	0	?	0	525	0	Calibration
421	4.2245	8065.75	0	?	0	525	0	Calibration
422	4.2346	8089.6	0	?	0	525	0	Calibration
423	4.2446	8107.62	0	?	0	525	0	Calibration
424	4.2546	8128.42	0	?	0	525	0	Calibration
425	4.2646	8148.35	0	?	0	525	0	Calibration
426	4.2746	8134.91	0	?	0	525	0	Calibration
427	4.2846	8027.23	0	?	0	525	0	Calibration
428	4.2946	8002.56	0	?	0	525	0	Calibration
429	4.3046	8080.28	0	?	0	525	0	Calibration
430	4.3146	8139.35	0	?	0	525	0	Calibration
431	4.3247	8182.18	0	?	0	525	0	Calibration
432	4.3347	8156.21	0	?	0	525	0	Calibration
[truncated: 31,397 more rows]

## Sheet: ED Figure 9H
Title: 1 Date: 2022/08/03 16:26
[truncated: 31,833 more rows]

## Sheet: ED Figure 9I
Title: keys limit reached Date: 2020/10/14 15:44
[truncated: 2,833 more rows]

[truncated: 1 more sheets: ED Figure 9J]
