# Supplementary material for: All-optical closed-loop voltage clamp for precise control of muscles and neurons in live animals
Source: Research Square preprint supplement (doi:10.21203/rs.3.rs-1505565/v1), 2023-03-29
Supplement: Supplementary file 14 [file bf3d9be16228ef9a463a1c6b.docx]

| 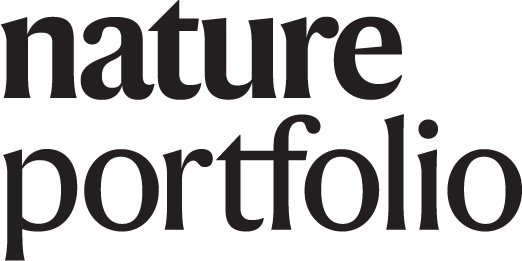 |  |
| --- | --- |

| **Author Checklist** | NCOMMS-22-49845A |
| --- | --- |
| 0000000000000000000000000000000000000000000000000000000000000 | 0000000000000000000000000000000000000 |
| **Please check the items below carefully and add a response in each row of the table to indicate the changes that you have made. Please also check through any additional marked-up edits we may have provided within the manuscript file.** | |
|  |  |
|  |  |
|  |  |
| Abstract and editor's summary |  |
| Our guidance: | Your response: |
| We would like to propose a revised title to comply with our formatting requirements and improve the accessibility of your work:  All-optical closed-loop voltage clamp for precise control of muscles and neurons in live C. elegans  Please edit the title in your manuscript files accordingly. Note that further minor changes may be made during the production process, and you will be able to check these in the proofs. | We would like to keep the original title. The method described is working in animals (*C. elegans* is an animal), and there is no reason to think it would not also work in other small animals. Thus restricting it to “C. elegans” would imply that it only works in this animal. We agree that it will likely not work in live rodents, as the neural tissue is too dense (which is why we only attempted it in slice culture). But as long as the neurons are not too close and the tissue is not too thick, like e.g. *Drosophila* larvae, the OVC should work. |
| If you want to keep the component of "live animals" in the title, we suggest to specify "in live C. elegans" instead for clarity. Alternatively, we suggest to remove the "in line animals" part of the title. |  |
|  |  |
| Author information |  |
| Our guidance: | Your response: |
|  |  |
| Please review your complete author list to verify that it is complete and accurate. We ask that you consult with your coauthors to ensure that all names, affiliations, and titles are represented correctly. Note that if any authors are added or removed after this point then all authors will be requested to provide approval documentation that could potentially delay the production of your paper. | We would like to add one author, Dr. Holger Dill, who contributed to implementation in vertebrates. |
|  |  |
| Article structure |  |
| Our guidance: | Your response: |
| We can accommodate up to 10 display items (Figures or Tables) in the main article. Each Figure and Table must fit easily within an A4 page (210 x 297 mm). Please ensure that the number and size of your Figures and Tables fulfil these requirements to avoid any delay in the acceptance of your article. | The figures are dense but accessible as they are. The organization to 6 figures fits well with the organization of the text. |
| **Please ensure your main manuscript file includes the following sections, in this order:** |  |
| *Title Author list Affiliations Abstract Introduction Results Discussion (optional) Results and Discussion (optional) Methods Data Availability Code Availability (if relevant) References Acknowledgements Author Contributions Statement Competing Interests Statement Tables Figure Legends/Captions (for main text figures)* |  |
| We do not edit Supplementary Information files; they will be uploaded with the published article as they are submitted with the final version of your manuscript. Any tracked changes should be removed from the file and the file should be provided as a PDF file. Supplementary Figures do not need to be provided separately. | The manuscript is organized in the way as suggested. The Supplementary Information files are uploaded. Supplementary Figures as one PDF with legends. |
|  |  |
| Please supply Source Data files for all data presented in graphs within the Figures. | The source data has been uploaded. We generated individual excel files containing the raw data for each figure. |
| Within the Source Data file, the relevant raw data from each figure or table (in the main manuscript and in the Supplementary Information) should be represented by a single sheet in an Excel document, or a single .txt file or other file type in a zipped folder. An example of the Source Data file is available demonstrating the correct format:  https://www.nature.com/documents/ncomms-example-source-data.xlsx  The file should be labelled 'Source Data', with the title and a brief description included in your response here, and should be mentioned in all relevant figure legends using the template text below:  'Source data are provided as a Source Data file.'  A reference to the source data file should be added in the 'Data Availability' section, using the text “Source data are provided with this paper. | This sentence has been added. |
|  |  |
| Main text |  |
| Our guidance: | Your response: |
| Please refrain from using words such as new/novel/first, when referring to the scientific findings. Please also remove exaggerated language such as 'extremely'/'outstanding' | n.a. |
| Please do not use italics, bold font, underlining or speech marks/quotation marks except in headings unless required for technical terms (in both the main text and the display items). | n.a. |
| Please make sure that mathematical terms throughout your manuscript and Supplementary Information (including in figures, figure axes, and legends) conform strictly to the following guidelines. Equations must be supplied in editable format, and not as images. Scalar variables (e.g. x, V, χ) must be typeset in italic, whereas multi-letter variables and functions (e.g. log) must be formatted in roman. Vectors (such as the wavevector k or the magnetic field vector B) must be typeset in bold without italics. | n.a. |
| Please label equations sequentially as (1), (2), (3), etc. | This is already present. |
| Please use italics for species names, both in the main text and the display items. | Yes |
|  |  |
| Figures and Tables |  |
| Our guidance: | Your response: |
| Please see the guidelines linked below for detailed instructions about how your figures should be prepared. Following these instructions will reduce the chances of delays should we need to request replacement artwork from you at a later stage. | We adhered to these guidelines. |
| <https://www.nature.com/documents/NRJs-guide-to-preparing-final-artwork.pdf> |  |
| Please ensure that data presented in a plot, chart or other visual representation format shows data distribution clearly (e.g. dot plots, box-and-whisker plots, violin plots). When using bar charts, please overlay the corresponding data points (as dot plots) whenever possible and always for n ≤ 10. All box-plot elements (center line, limits, whiskers, points) should be defined in the legends accompanied by precise n numbers. |  |
| **Please note that data presentation has to be revised to comply with our policy in Supplementary Figure 6f.** | **The figure has been altered.** |
| Wherever statistics have been derived (e.g. error bars, box plots, statistical significance) the legend needs to provide and define the n number (i.e. the sample size used to derive statistics) as a precise value (not a range), using the wording “n=X biologically independent samples/animals/cells/independent experiments/n= X cells examined over Y independent experiments” etc. as applicable.  We strongly discourage deriving statistics from technical replicates, unless there is a clear scientific justification for why providing this information is important. Conflating technical and biological variability, e.g., by pooling technically replicates samples across independent experiments is strongly discouraged. | We added the requested information where it was missing. We also clarified what n refers to if this was unclear, as you pointed out. |
| **1. Please note that this information is missing in the legends of figures 2d-e, h; 3b, f, l-m; 4f-g; supplementary figures 1d, h; 3g; 6e, f; 7d, k; 10b.   2. Please provide a precise value of ‘n’ in the legends of figures 1h-i; 3c, g-k; 5g; supplementary figures 1f, g; 2f; 4d; 5d, e; 6a-c.   3. Although ‘n’ is provided, please describe the nature of entity for ‘n’ in the figures 1h-I; 2h; 3c, f, l-m; 4f-g; 5g-h; 6k, m; supplementary figures 1e-h; 2e, f; 3e, f; 4a-e; 5b, d, e, h, i; 6a-c; 7c, g; 8b, c, e; 9b, c; 10c, f.** |  |
| All error bars need to be defined in the legends (e.g. SD, SEM) together with a measure of centre (e.g. mean, median). For example, the legends should state something along the lines of “Data are presented as mean values +/- SEM” as appropriate. All box plots need to be defined in the legends in terms of minima, maxima, centre, bounds of box and whiskers and percentile. |  |
| **1. Please note that the error bars need to be defined in the legends of figures 3g-i, l-m; supplementary figures 1d, h; 4a-c; 6f; 10b, f.   2. Please note that the error bands need to be defined in the legend of figure 2k.  3. Please note that the box plots need to be defined in terms of minima, maxima, centre, bounds of box and whiskers and percentile in the legends of supplementary figures 6a, c, e; 10c.** | **We added this information accordingly.** |
| The figure legends must indicate the statistical test used. Where appropriate, please indicate in the figure legends whether the statistical tests were one-sided or two-sided and whether adjustments were made for multiple comparisons. For null hypothesis testing, please indicate the test statistic (e.g. F, t, r) with confidence intervals, effect sizes, degrees of freedom and P values noted. Please provide the test results (e.g. P values) as exact values whenever possible and with confidence intervals noted. |  |
| **1. Please indicate the statistical test used for data analysis and where appropriate, please specify whether it was one-sided or two-sided and whether adjustments were made for multiple comparisons, in the legends of supplementary figures 1g; 7d.   2. Please note that the information on whether the statistical test used was one-sided or two-sided, where appropriate, is missing in the legends of figures 1i; 2d-e, j, l; 5e, g-h.   3. Please note that the exact p value should be provided, when possible, in the legends of figures 2d-e, j, l; 3f, j-l; 5e, g-h; 6f-g, k; supplementary figures 4d; 5c-e, h, i; 6c.   4. Please indicate what ‘***’ represents; if this represents p values, please indicate the statistical test used and where appropriate, specifywhether it was one-sided or two-sided and whether adjustments were made for multiple comparisons and the exact p value in the legend of supplementary figure 7d.   5. Please note that for the figure 1h, p-value and statistical test are indicated in the legend. However, comparison for the same, has not been represented in the figure. Please rectify this in the figure or legend as applicable. Also, if appropriate, please provide exact p-values.** | **We added these missing informations.** |
| Please state in the legends how many times each experiment was repeated independently with similar results. This is needed for all experiments, but is particularly important wherever results from representative experiments (such as micrographs) are shown. If space in the legends is limiting, this information can be included in a section titled “Statistics and Reproducibility” in the methods section. |  |
| **Please revise Please note that this information is missing in the legends of figures 1e; 4b; 5a; 6a.** | **We added this information, though they are not really appropriate here, as the micrographs were not used to determine any quantitative data.** |
| Please ensure that all micrographs include a scale bar and this scale bar is defined on the panels or in the figure legends. |  |
| **Please note that scale bar is missing for supplementary figure 4e.** | **This was added.** |
| Shadings or symbols in graphs must be defined in some fashion. We prefer that you use a key within the image; do not include colored symbols in the legend/caption. | Done. |
| Figure legends/captions should not exceed 350 words. Please shorten by removing detailed methodological information and/or interpretation, or, if appropriate, consider splitting the affected figures in two. | Figure legends are maximally 350 words. |
| Please make sure that the terms ‘atomic units (a. u.)’ or ‘arbitrary units (arb. units)’ are appropriately used. | We changed this where appropriate in the figures and legends. |
| Any abbreviations, symbols or colours present in your figures must be defined in the associated legends. | We did this. |
| Please do not use symbols in your legend, instead write out the symbols in words (blue circles, red dashed line, etc.). | We altered this to “cyan star”. |
|  |  |
| Data and Code |  |
| Our guidance: | Your response: |
| Nature journals strongly support public availability of data and code. Please deposit the data and code used in your paper into a public data repository, or alternatively, present the data as Supplementary Information. If data can only be shared on request, please explain why in your Data Availability Statement, and also in the correspondence with your editor.   Please note that for some data types, deposition in a public repository is mandatory. Any restrictions on sharing of these data types must be clearly indicated in the statement and discussed with the editor. More information on our data deposition policies and available repositories can be found here: | The code is provided as supplementary data. |
| <https://www.nature.com/nature-research/editorial-policies/reporting-standards#availability-of-data> |  |
| All published manuscripts reporting original research in Nature Portfolio journals must include a data availability statement, within the Methods and under the heading 'Data Availability'.   The data availability statement must make the conditions of access to the “minimum dataset” that are necessary to interpret, verify and extend the research in the article, transparent to readers.   This minimum dataset may be provided through deposition in public community/discipline-specific repositories, custom proprietary repositories or general repositories like Figshare, Zenodo and Dryad. Providing large datasets in supplementary information is strongly discouraged and the preferred approach is to make data available in repositories. Scientific Data, a Nature Portfolio journal, maintains a list of approved and recommended data repositories to support researchers seeking suitable repositories for their data (https://www.nature.com/sdata/policies/repositories).  The Data Availability Statement should also reference any source data published alongside the paper.  If DOIs are provided, we also strongly encourage including these in the Reference list (authors, title, publisher (repository name), identifier, year).  For clinical datasets or third party data, please ensure that the statement adheres to our policy (https://www.nature.com/nature-research/editorial-policies/reporting-standards#availability-of-data) |  |
| Please use the following template to provide all the information stated above:  The XX data generated in this study have been deposited in the YY database under accession code ZZ [add hyperlink here]. The XX data are available under restricted access for {insert reason}, access can be obtained by {explain how}. The raw XX data are protected and are not available due to data privacy laws. The processed XX data are available at YY. The XX data generated in this study are provided in the Supplementary Information/Source Data file. The XX data used in this study are available in the YY database under accession code ZZ [Add hyperlink here]. |  |
| Specific advice on your Data Availability Statement: |  |
| Please include the details of the software scripts available in the code availability statement, instead of in the Supplementary Materials. Please rename your "Software Availability" section to "Code Availability", and please specify the online availability (currently reads "XYZ"). Please provide a Data Availability statement (without Materials). In your Data Availability statement, we encourage you to make your data freely accessible. If alternatively, data remain available upon request, please remove the word "reasonable", and instead, if applicable, please specify the restrictions that exist to data access. | This was altered. The code is provided as supplementary data. |
| Please find attached to our decision letter a marked up copy of your reporting summary. After making the requested changes, please be sure to include the final version of your reporting summary, without our comments, in your submission as a supplementary information file. The reporting summary will be published alongside the paper. Please note that this form is a dynamic 'smart pdf' and must therefore be downloaded and completed in Adobe Reader, instead of opening it in a web browser | Yes, this has been uploaded. |
|  |  |
| Methods |  |
| Our guidance: | Your response: |
| Please list the exact source of each strain, and ensure sex, substrain, genetic background, and age of animals is clearly stated for each experiment. | n.a., C. elegans strains are all from our lab. Rat strain origin has been described. |
| For animal studies, indicate the species, strain (including substrain), sex, number and age of animals in every experiment. In the Reporting Summary and Methods, confirm that the study received ethical approval, naming the organization that approved the study and indicating the protocol number where applicable. Alternatively, explain why ethical approval was not required.  The Reporting Summary and Methods should also include whether sex was considered in the study design and analysis and if not clarify why.   Data should be reported disaggregated for sex where this information has been collected; disaggregated numbers for individual experiments must be provided in the source data as appropriate whereas overall numbers may be provided in the methods section and Nature Portfolio Reporting Summary.  For more information please see <https://www.nature.com/articles/s41467-022-30398-1> | This has been done. |
| Sufficient details of the experiments must be provided in the Methods section such that they could be reproduced without reference to published papers. Use of the term "as described previously" is not encouraged. | All done accordingly. |
| Sequences of oligonucleotides (e.g. primers, RNAi, Crispr), or company names and catalog numbers if reagents are commercial, should be provided in the Methods. If this information is lengthy, it may be provided in Excel format, as separate Supplementary Data, mentioning the file in the Methods. | Done. |
| All accession codes must be accompanied with their hyperlinks throughout (for example, "5XRN [http://doi.org/10.2210/pdb5XRN/pdb]", "1483958 [https://doi.org/10.5517/ccdc.csd.cc1lt5m6]", "SRP109982 [https://www.ncbi.nlm.nih.gov/sra/?term=SRP109982]", "GSE101099 [https://www.ncbi.nlm.nih.gov/geo/query/acc.cgi?acc=GSE101099]" or "NQLW00000000 [https://www.ncbi.nlm.nih.gov/assembly/GCA_002312845.1/]"). | n.a. |
|  |  |
| End matter |  |
| Our guidance: | Your response: |
| The Competing Interests statement must encompass all authors. Please edit the statement accordingly (such as by adding 'The remaining authors declare no competing interests', if this is accurate). | This has been added. |
| As your Competing Interests section includes a patent, we ask you to please include the following information in the Competing Interests section: - patent applicant (whether author or institution) - name of inventor(s) - application number - status of application - specific aspect of manuscript covered in patent application | This has been added. |
| Nature Portfolio defines Competing Interest (CI) as financial and non-financial interests (including but not limited to funding, employment, stocks, shares, patents, personal or professional relationships with individuals or institutions, and unpaid membership advocacy) that could be perceived to directly undermine the objectivity, integrity, and value of a publication, or could be seen as having an influence on the judgments and actions of authors with regard to objective data presentation, analysis, and interpretation.  Please thoroughly review our policy on Competing Interests and include a detailed statement both in your final manuscript file and in our manuscript tracking system. Please ensure the statements are identical in both. Be specific about how each point stated relates to the research and list applicable author initials, and/or patent numbers.  If there are no competing interests, a negative statement must be included. |  |
| <https://www.nature.com/nature-research/editorial-policies/competing-interests> |  |
| Please confirm that all relevant funding awarded to each author is described in the Acknowledgements section. List each grant number, followed by the initials of the author who received it. | Done. |
|  |  |
| Preparing your manuscript files |  |
| Our guidance: | Your response: |
| Unless otherwise stated please limit individual file sizes to approximately 30MB. We strongly encourage the use of repositories for large datasets or source data due to size considerations. |  |
| Please supply a brief (maximum 250 characters, including spaces) summary of the main findings of the paper to be used on our website and in our e-alerts. The summary should be written in the third person in language suitable for a broad audience. The summary may be edited by the editors prior to publication. Please provide this summary in your cover letter. | An all-optical method is described for bidirectional steering of membrane potential, in closed loop, in *C. elegans* muscles and neurons, and rat hippocampal slice culture. The ‘optogenetic voltage clamp’ uses two microbial rhodopsin actuators and the rhodopsin voltage indicator QuasAr. |
| Please supply legends for each Supplementary Movie/Audio/Data file in your response here (not in the Supplementary Information file). Please label each files as Supplementary Movie/Audio/Data 1, etc. | **Supplementary Movie 1. *C. elegans* expressing BiPOLES in cholinergic motor neurons, during a wavelength ramp from 400-600 nm.** Animal crawling on solid substrate, with inactive (relaxed) muscle, transition to normal movement, followed by activated (contracted) muscle and respective paralysis, as indicated.  **Supplementary Movie 2: ‘On-the-run’ mode of the OVC, enabling adjusting membrane voltage during a running acquisition.** Left panels, upper: monochromator wavelength, lower: voltage fluorescence trace. Arrow keys indicate the live settings chosen by the experimenter.  **Supplementary Movie 3: Dynamically clamping voltage in the pharynx, using the OVC.** Video shows QuasAr fluorescence in the terminal bulb of the pharynx. Structures of the grinder of the pharynx are indicated (open and closed states), as well as the calibration and clamping phase. Overlaid are optical voltage traces (bottom), as well as the wavelength of the monochromator, used during clamping, as a color-coded trace at the top. |
| Supplementary Software must be supplied as a .zip file and the legend for it must be provided in your response here. | Software scripts, to be implemented in MicroManager microscopy freeware, are provided online:  1) Main OVC software script  2) OVC ‚on-the-run‘ script  3) OVC four-step script  4) OVC pseudo-I/V script  5) Optical current clamp script  6) Software descriptions |
| The use or adaptation of previously published images is strongly discouraged. If this is unavoidable, please request the necessary rights documentation to re-use such material from the relevant copyright holders and return this to us when you submit your revised manuscript. Please check whether your manuscript or Supplementary Information contain third-party images, such as figures from the literature, stock photos, clip art or commercial satellite and map data.  For more information on what constitutes ownership by a third party, please contact our Editorial Assistant at naturecommunications@nature.com |  |
| Please check in particular: |  |
| **Supplementary Figure 3a, There is suspected third party content in Figure 1b,6a,6h.Kindly look into it.** | **These pictograms have been generated by the first author, using Microsoft Power Point.** |
|  |  |
| Forms to complete |  |
| Our guidance: | Your response: |
| **Editorial Policy Checklist** | **Done.** |
| Please update and upload a final version of the Editorial Policy Checklist with your revised manuscript files. A blank Editorial Policy Checklist can be found via the link below. Note that this form is a dynamic ‘smart pdf’ and must be downloaded and completed in Adobe Reader. |  |
| Please update your current checklist or download from: |  |
| <https://www.nature.com/documents/nr-editorial-policy-checklist.zip> |  |
|  |  |
|  |  |
| **You will need to upload:** |  |
| Editorial Policy Checklist | yes |
| Completed Third Party Rights Table (if relevant) | n.a. |
| A completed copy of this checklist | yes |
| The main manuscript file in either Microsoft Word or LaTeX format | yes |
| Separate Figure files | yes |
| Separate Source Data files | yes |
| Inventory of Supporting Information | Yes |
| A Supplementary Information file | Yes |
| Reporting Summary | Yes |
|  |  |
