# Supplementary material for: All-optical closed-loop voltage clamp for precise control of muscles and neurons in live animals
Source: Research Square preprint supplement (doi:10.21203/rs.3.rs-1505565/v1), 2023-03-29
Supplement: Supplementary file 15 [file dc6a6398fad28e4b0892ac87.xlsx]

## Sheet: ED Figure 4A
Time(s)	1	2	3	4	5	6	7	8	Mean	SEM
0.033333	0.995186		1.01887			1.01789	1.01174		1.01092	0.00548
0.066667	0.99733		1.00933			1.01012	1.00675	0.982632	1.00123	0.00518
0.1	0.989829		0.997226		0.972648	0.99376	1.00017		0.99073	0.00484
0.133333			1.00219			0.993356	0.99583		0.99712	0.00263
0.166667	1.00592		1.01776			1.01153	1.01104		1.01156	0.00242
0.2	1.00895		1.00836			1.00695	1.00112	0.965593	0.99819	0.00827
0.233333	1.00942		1.01145			1.01119	1.005	1.00136	1.00768	0.00196
0.266667	1.00027		0.9997			1.01661	1.01217		1.00719	0.00426
0.3			1.01083		1.05376	1.0115	1.00942		1.02138	0.0108
0.333333	1.0067		1.01088		1.0468	1.00168	1.00065		1.01334	0.00856
0.366667			1.00075			1.01309	1.01597		1.00994	0.00467
0.4			0.994062			1.00139	1.01502		1.00349	0.00614
0.433333			0.994399			1.00198	1.02066		1.00568	0.0078
0.466667			1.01135			1.00552	1.00368		1.00685	0.00231
0.5			1.00392		0.980577	1.00269	1.00035		0.99688	0.00549
0.533333			1.00775			1.00914	0.997889	1.01017	1.00624	0.00283
0.566667			1.00825		1.04319	1.01157	1.00285	1.00703	1.01458	0.00729
0.6			0.997591			1.01779	0.992992		1.00279	0.00762
0.633333			1.00442			1.00897	0.995929	1.00273	1.00301	0.0027
0.666667			0.999394			1.01224	1.00351	0.98303	0.99954	0.00612
0.7			1.00441			1.01745			1.01093	0.00652
0.733333			1.00656			1.01806	0.995839	1.00045	1.00523	0.00481
0.766667			0.994466			1.02005	0.994557	1.00881	1.00447	0.00619
0.8			0.998466			1.02936	1.00365		1.01049	0.00955
0.833333					1.04524	1.01646	1.00928	1.00405	1.01876	0.00919
0.866667			1.00202			1.01314			1.00758	0.00556
0.9			1.00203		1.04355	1.00518		1.00364	1.0136	0.01
0.933333			0.997558			1.00822		1.00553	1.00377	0.0032
0.966667			0.996178			1.01379		1.00633	1.00543	0.0051
1			0.996916			1.00682		1.00313	1.00229	0.00289
1.03333			0.998304		1.03628	1.01334		1.00194	1.01247	0.00856
1.06667					1.03387	1.00102		1.01007	1.01499	0.00979
1.1			0.984936		0.973747	0.972192		0.998471	0.98234	0.00608
1.13333	0.959924	0.985184	0.985371		0.983322				0.97845	0.00619
1.16667	0.979397		0.999921		1.01021			1.00285	0.99809	0.0066
1.2			1.00109		0.959553			1.01074	0.99046	0.0157
1.23333	1.01886		0.99667					1.00155	1.00569	0.00673
1.26667	1.00048		0.990539			1.00294		1.00417	0.99953	0.00309
1.3	1.00661	0.940731	1.00116	0.991238		1.00265			0.98848	0.0122
1.33333	1.01851	0.997459	1.00149	1.0079		0.948452		1.00499	0.99647	0.01003
1.36667	1.00228	0.996452	0.991915	0.999795				1.01154	1.0004	0.00328
1.4	1.00641	0.99643	0.999702	0.997311		0.940492	0.972717	1.00775	0.98869	0.00914
1.43333		1.00439	0.99652	0.950122		0.966242	0.974149		0.97828	0.00992
1.46667	0.97251	1.00107	0.993789	0.978899	0.976172	0.956393	0.971561		0.97863	0.00561
1.5	0.989859	1.01259	0.992493	0.996883		0.986564	0.993162	0.959822	0.9902	0.00597
1.53333	1.00078	1.01216	0.993492	0.99511	0.966973	0.988244	0.961121	1.00421	0.99026	0.00629
1.56667	1.01099	1.00932	0.992415	0.998545		0.993275	0.983064	1.00134	0.99842	0.00373
1.6	1.01262		0.997635			1.00437	0.976133	1.00935	1.00002	0.00649
1.63333	1.01794	1.02098	0.995352	1.00777	0.978074	0.99744	0.977904	1.00183	0.99966	0.0057
1.66667	1.01208		1.00216	1.0142		1.00669	0.991238	1.0012	1.00459	0.00341
1.7	0.99403		1.00476	1.0069	0.967122	0.994054	1.00806	0.999889	0.9964	0.00534
1.73333	0.992982	1.02103	1.0085	1.00071	0.980592	0.991013	1.01573	0.996231	1.00085	0.00478
1.76667	0.991656		0.995219	1.01312		0.990979	1.01546	0.994343	1.00013	0.00453
1.8	0.987279		1.00066	1.02128	0.986958	0.992111	1.01009		0.99973	0.00562
1.83333	0.993442		1.00377	1.01106	0.958058	0.987309	1.00865	0.993265	0.99365	0.00679
1.86667	1.00589	0.97168	0.988576	1.00979	0.975178	0.990104	1.01017		0.99306	0.00606
1.9	1.01411	1.02016	1.0002	1.00035		0.995049	1.01013		1.00667	0.00394
1.93333	1.00515		1.00163	0.99664	0.980376	0.985157	1.00642		0.9959	0.00442
1.96667	0.995836		0.983648	0.992598		0.99616	1.00724		0.9951	0.00378
2	0.996775	1.01037	0.990974	1.00978	1.04774	0.99024	1.00093		1.00669	0.00749
2.03333	1.00551		0.98262	0.99472		1.0016	1.00055		0.997	0.00399
2.06667	1.0055	1.00651	0.989317	0.979174		0.998893	1.00962		0.99817	0.00481
2.1	1.00881	1.00484	0.997057	0.998987		0.999177	0.995241	1.01107	1.00217	0.00231
2.13333	0.998776	0.996066	0.9975	1.00622		0.997801	0.999344		0.99928	0.00146
2.16667	0.995965	0.999624	1.00196	0.973135	1.04779	1.00694	0.991684		1.00244	0.00859
2.2	1.01138	0.98884	0.986608	0.964595	0.954582	1.00727	1.00334	1.01062	0.9909	0.00764
2.23333	0.995392	1.00279	1.00195	0.991164		1.00006	1.00517		0.99942	0.00213
2.26667	0.995317	0.987853	0.992529	0.984126	1.00985	1.00516	1.00696		0.9974	0.00379
2.3	0.999811	0.995061	1.00298	1.00279		0.981141	0.995739		0.99625	0.00332
2.33333	0.995446	0.996114	1.00337	0.983464		0.998667	0.966262		0.99055	0.00555
2.36667	0.999051	1.0022	0.999518	0.9887	1.05314	0.996661	0.971469		1.00153	0.00947
2.4	0.995043	0.996732	0.990132			0.985949	0.986538		0.99088	0.00218
2.43333	1.00566	0.986905	0.997252	0.981803	1.02981	0.991274	0.963686		0.99377	0.0078
2.46667	1.00185	0.981019	1.00139		0.989935	0.997101	0.973977		0.99088	0.00467
2.5	0.994439	0.987724	0.999385	0.976206		0.990745	0.988273		0.98946	0.00319
2.53333	1.00354	0.988643	1.00939	0.981762		0.988897	0.991654		0.99398	0.00423
2.56667		0.995826	1.00019	0.997896		0.993271	0.993695		0.99618	0.0013
2.6	1.00623	0.994718	0.944644	0.984861	0.955154	0.995968	1.01529		0.98527	0.00988
2.63333	1.00777	0.996309	0.991417	0.976658	0.975165	0.996086	1.01239	0.998216	0.99425	0.00466
2.66667	1.00639	0.994415	0.943751		0.983398	0.988678	1.01312		0.98829	0.00998
2.7	1.02028	0.977833	0.993816			0.98604	1.01194		0.99798	0.00793
2.73333	1.00945		0.974873			0.985832	1.00825		0.9946	0.00853
2.76667	1.01453		1.00128			0.979065	1.01495	1.00489	1.00294	0.00654
2.8	1.01443		0.983441		1.04736	0.983048	1.00906	0.989478	1.00447	0.01014
2.83333	1.01748		1.00057			0.989409	1.00759	1.0073	1.00447	0.00463
2.86667	1.01377		0.977746	0.977731	1.0084	0.992961	1.01832	1.00908	0.99972	0.0064
2.9	1.01721		0.979898	0.973702	0.999182	0.994347	1.00567	1.0126	0.99752	0.00612
2.93333	1.01581		1.00904	0.98531		0.999739	1.00425		1.00283	0.00513
2.96667	1.00382		1.00803	0.977497		0.989969	1.01161		0.99819	0.00634
3	0.998715		1.00077	0.97927			1.00219		0.99523	0.00537
3.03333	1.01604		0.991827			1.0135	1.01346		1.00871	0.00566
3.06667	1.00876	1.00038	0.979206	1.00019	0.985806	0.999047	1.00462	1.00114	0.99739	0.00348
3.1	1.0191		0.931676	0.97026	0.971946	1.00769	1.00697	1.01243	0.98858	0.01201
3.13333	1.00915	1.01743	0.981818	0.97336		1.00683	1.00277	1.01202	1.00048	0.00622
3.16667	1.00724			0.982771		1.00245	0.991092	1.0034	0.99739	0.00454
3.2	1.00874					1.0102	1.00512		1.00802	0.00151
3.23333	1.00873	1.01383	0.974023	0.985918		1.01631	1.00926		1.00134	0.00703
3.26667	1.01142		0.998114	0.990586		1.01074	1.0052		1.00321	0.00396
3.3	1.02058	1.00403	0.982856	0.997003		1.01116	1.01453	1.00238	1.00465	0.00471
3.33333	1.01128	1.00942	1.0041	0.987731		1.0105	0.99634		1.00323	0.00385
3.36667	1.01002	1.01508	0.987541			1.01229	1.00767	1.00885	1.00691	0.00402
3.4		1.0177	0.990456	0.982125		1.00744	1.00388	0.918635	0.98671	0.01455
3.43333	1.0083	1.00596	1.00331	0.96035	1.027	1.00168	0.999865		1.00092	0.00758
3.46667	0.998945	1.00684	0.98938	0.986573	1.04342	0.998287	1.00993	1.01149	1.00561	0.00628
3.5	0.986512	1.01344	0.985675	0.960549	1.02134	1.00258	1.00724	1.00605	0.99792	0.00687
3.53333	1.00176	1.005	0.97577	0.975745	0.974555	1.00432	1.01204	1.0113	0.99506	0.0059
3.56667	0.99768	1.01305		0.96986		1.01062	1.01224		1.00069	0.0082
3.6	1.00534	1.01131		0.984854		0.990002	1.01178	1.00635	1.00161	0.00465
3.63333	1.00328	1.00296		0.982325	1.05096	1.01497	1.00571	1.01238	1.01037	0.00785
3.66667	0.999118	1.01447	0.989107	0.982951	1.04128	1.01618	1.01184		1.00785	0.00739
3.7	0.979083	1.00469		0.969372		1.00107	1.00658		0.99216	0.00753
3.73333	0.998465	0.99253	0.987197		0.956551	1.00132	1.01126		0.99122	0.00769
3.76667	0.992209		1.00895	0.995711		0.999347	1.0127		1.00179	0.00391
3.8	0.999943	0.995961	1.00286	0.979003		1.01444	1.00881		1.00017	0.005
3.83333		0.987634		0.988178		1.00795	1.00943	1.01217	1.00107	0.00542
3.86667		0.994403	0.999885	0.987083	0.991492	1.01101	1.01013		0.999	0.00403
3.9		0.992395	0.99785	0.977187		1.00487	1.01087	0.988848	0.99534	0.00489
3.93333		1.00773	0.98979	0.985683	1.00464	1.00068	1.01537	0.992789	0.99953	0.00402
3.96667		0.994551	1.00595	0.998203		1.0093	0.993919	0.98789	0.9983	0.00327
4		0.998065	1.0033	0.986432		1.01014	0.993507	0.982439	0.99565	0.00424
4.03333		0.925705	1.00582	1.00029	1.04924	1.01102	1.00057	0.986221	0.99698	0.014
4.06667			0.998915	1.00314	0.961233	0.976694	1.00585	0.987789	0.98894	0.00709
4.1		1.00936	0.99787	0.988354	0.96519	0.998708	0.9966	0.976274	0.99034	0.00569
4.13333		1.01336	1.00545	0.991377	0.971977	0.985004	0.999846	0.971185	0.99117	0.00613
4.16667		1.0147	1.01227	0.995056	0.974427	0.993005	1.00562	0.978944	0.99629	0.00592
4.2			1.0024	0.962446		0.989767		0.974991	0.9824	0.0087
4.23333	0.966401		1.00056	0.969251	1.00055	0.975925	1.00863	0.979292	0.9858	0.00645
4.26667	0.973668	1.01565	1.00724	0.994397		0.970192	1.00906	0.983957	0.99345	0.00681
4.3	0.980002	1.01511	0.994037	0.971635	1.00562	0.964408	1.00177	0.988211	0.9901	0.00616
4.33333	0.989481		0.989897			0.994218	1.00075	0.994201	0.99371	0.00203
4.36667	0.993716		0.99018			0.984927	0.993283	0.991232	0.99067	0.00158
4.4	0.990969		0.997389			0.97541	0.992933	0.988426	0.98903	0.00371
4.43333	1.00124	0.960712		0.972019		0.97829	1.00635	1.00937	0.988	0.00829
4.46667	1.00711		1.00778	0.960943	0.993092	0.983428	1.00891	0.983477	0.99211	0.00668
4.5	1.00174	0.936709	1.00167	0.996087		0.991475	1.00912	0.99469	0.99021	0.00918
4.53333	0.992321		1.00052			0.995797	1.01395	0.988532	0.99823	0.0044
4.56667	0.997293		0.998252			1.0012	1.00454	0.986542	0.99757	0.00303
4.6	1.01018		1.00516			0.994265	1.01371		1.00583	0.00423
4.63333	0.996396		0.994369	0.96981		1.0025	1.01506	0.989701	0.99464	0.00612
4.66667	0.99037		0.999408	0.976164	0.970985	1.00034	1.01137	0.987349	0.99086	0.00536
4.7	0.99236		1.0004	0.988166	0.963977	1.00148	1.01538	0.980862	0.9918	0.00623
4.73333	0.992624	1.01064	1.00261	0.984405	0.986168	1.00098	1.02861	0.988829	0.99936	0.00526
4.76667	0.981607	0.960118	1.00867	0.976742	0.957335	1.00674	1.01609	0.980697	0.986	0.00788
4.8	0.996572	0.968018	1.00034		0.976441	1.00056	1.00925	0.982324	0.9905	0.00568
4.83333	0.99013	1.01376	1.00097	0.98505		1.00486	1.01581		1.00176	0.00505
4.86667	1.0056		0.996223			1.00331	1.01308		1.00455	0.00347
4.9	1.00104	1.01106	0.974021	0.970264		0.995511	1.00602	0.97271	0.99009	0.00654
4.93333	0.995143			0.959067		0.983937	1.01672		0.98872	0.012
4.96667	0.996734		0.968441		0.954731	0.986252	1.0024		0.98171	0.00888
5	0.991748	0.902107	0.803622	0.963663	0.915	0.985686	0.992304	0.887954	0.93026	0.0234
5.03333	0.97931	1.01864	0.967474		1.05978	0.988138	0.98621	0.819601	0.97417	0.02829
5.06667	0.982254	1.01724	0.954723	0.856288	1.06332	0.980878	0.993291	0.827085	0.95939	0.02817
5.1	0.987004	1.02116	0.95942	0.977156	1.06372	0.989438	0.973058	0.982258	0.99415	0.01174
5.13333	0.983028	0.889638	0.963103	0.970537	1.04331	0.988796	0.992123	0.981064	0.97645	0.01505
5.16667	0.98925	0.905341	0.945526	0.899045	0.904369	0.993962	0.988857	0.866745	0.93664	0.01751
5.2	0.986587	0.883772	0.961498	0.947751	1.03399	0.993411	0.99311	0.868697	0.9586	0.02012
5.23333	0.985682	0.888508	0.95062	0.987785	1.04928	0.993937	0.990501	0.825332	0.95896	0.02493
5.26667	0.980315	1.02223	0.953884	0.865912	0.951955	0.999638	0.992879	0.977394	0.96803	0.01673
5.3	0.977928	0.872421	0.953774	0.967672	0.996674	0.992538	0.996448	0.981926	0.96742	0.01455
5.33333	0.972267	0.861144	0.94777	0.881503	1.01968	1.00367	0.897591	0.982635	0.94578	0.02091
5.36667	0.978467	0.898789	0.947356	0.967654	1.00515	0.997073	0.996186	0.984124	0.97185	0.01231
5.4	0.973234	0.862423	0.948524	0.982552	1.0469	0.990497	0.997605	0.987102	0.97361	0.01865
5.43333	0.979739	0.898534	0.93359	0.969577	1.04811	0.991669	0.999183	0.987331	0.97597	0.01579
5.46667	0.98005	0.980028	0.939293	0.813812	1.04794	0.989151	0.99699	0.991483	0.96734	0.02432
5.5	0.973851	1.02251	0.934219	0.999747	1.00629	0.980709	0.9956	0.834381	0.96841	0.0213
5.53333	0.965001	1.0168	0.956042	0.983562	1.03267	0.986623	1.01138	0.982559	0.99183	0.00931
5.56667	0.973394	0.910867	0.948596	0.992865	1.03036	0.993356	0.985703	0.992521	0.97846	0.01258
5.6	0.978641	1.01225	0.943185	0.987819	0.899417	0.985571	0.999164	0.994331	0.97505	0.01293
5.63333	0.975651	1.01396	0.957678	0.980792	1.03074	0.994172	0.996451	0.979193	0.99108	0.00817
5.66667	0.978902	0.908335	0.94812	0.980501	0.97411	0.990392	0.996779	0.984201	0.97017	0.0102
5.7	0.981787	1.0252	0.953728	0.985143	1.02732	0.985586	0.99767	0.972898	0.99117	0.00886
5.73333	0.982016	0.940843	0.95885	0.974641	0.885739	0.979904	0.993267	0.971366	0.96083	0.01211
5.76667	0.986459	0.926729	0.959338	0.969771	1.03852	0.979178	0.998219	0.980843	0.97988	0.01131
5.8	0.99915	1.01558	0.943659	0.974578	1.03745	0.992165	0.999998	0.991646	0.99428	0.00976
5.83333	0.997746	0.842919	0.9544	0.950858	1.04262	0.989361	0.996674	0.99743	0.9715	0.02097
5.86667	0.988644	0.904024	0.950369	0.984856	1.03617	0.984213	0.995003	0.994772	0.97976	0.0136
5.9	0.991141	0.981803	0.952593	0.976533	1.04042	0.978579	1.00411	0.989098	0.98928	0.00898
5.93333	0.899882	0.886711	0.950791	0.859126	0.903277	0.986509	0.996682	0.984638	0.93345	0.01865
5.96667	0.980783	0.868782	0.961012	0.968297	0.87222	0.987929	0.983173	0.983539	0.95072	0.01778
6	0.968713	0.86229	0.945704	0.971088	0.872803	0.99919	1.00473	0.987926	0.95156	0.0195
6.03333	0.982652	0.876096	0.95788	0.859675	1.05494	0.990464	0.984183	0.983093	0.96112	0.02263
6.06667	0.973406	0.824122	0.963287	0.831997	1.06224	0.982565	0.983262	1.00169	0.95282	0.02924
6.1	0.988328	0.994732	0.976997	0.965837	0.927863	0.987955	0.981483	0.997524	0.97759	0.00795
6.13333	0.989112	0.952535	0.987129	0.956191	1.07405	0.985307	0.989304	1.00127	0.99186	0.01319
6.16667	0.986641	1.00172	0.994852	0.813716	0.887972	0.980814	0.992308	0.877781	0.94197	0.02532
6.2	0.999651	0.995794	0.966032	0.834709	1.07644	0.979701	0.999523	0.847077	0.96237	0.02891
6.23333	0.987814	0.789201	0.993406	0.988293	0.909547	0.985257	0.980482	0.991758	0.95322	0.02539
6.26667	0.976969	1.00109	0.995716	1.00199	0.861584	0.990069	1.00183	0.993568	0.97785	0.01687
6.3	0.99059	0.99554	0.995783	1.00429	1.07239	0.994196	0.994645	1.00048	1.00599	0.0096
6.33333	0.982711	0.991871	0.991381		1.07607	0.993539	0.987649	0.994069	1.00247	0.01236
6.36667	0.984011	0.984439	0.982837	0.993234	0.894803	1.00367	0.997858	1.00616	0.98088	0.0127
6.4	0.979778	0.8607	0.995327	0.960775	1.06732	0.997839	0.996876	0.859168	0.96472	0.02528
6.43333	0.97939	0.97437	0.987291	0.870176	1.02597	0.98884	0.832703	0.996647	0.95692	0.02392
6.46667	0.983421	0.947601	0.980062	0.996548	0.877408	0.984215	1.00112	1.01601	0.9733	0.01539
6.5	0.975895	0.986308	0.990236	0.966493	0.865916	0.986953	1.00863	1.02073	0.97515	0.01674
6.53333	0.974316	0.801995	0.986067	0.937379	0.871788	0.976925	0.987685	0.841233	0.92217	0.026
6.56667	0.974878	0.856062	0.988576	0.92471	0.931914	0.988771	0.878542	1.0099	0.94417	0.01974
6.6	0.995653	0.962562	0.979661	0.977644	0.972497	0.986237	0.993828	1.00983	0.98474	0.00526
6.63333	0.967619	0.967037	0.837206	0.973586	0.913805	0.978025	0.983162	1.0281	0.95607	0.02021
6.66667	0.973343	0.787958	0.980891	0.95549	1.07115	0.986884	0.985886	0.842851	0.94806	0.03178
6.7	0.977578	0.969336	0.979956	0.96638	0.933246	0.978587	0.983035	0.842896	0.95388	0.01682
6.73333	0.982389	0.971868	0.966101	0.965192	0.881564	0.979264	0.987201	1.01719	0.96885	0.01377
6.76667	0.974038	0.960362	0.866435	0.963279	0.926201	0.986698	0.982125	0.839148	0.93729	0.01972
6.8	0.975778	0.969237	0.977145	0.961873	0.937008	0.985398	0.977869	0.846639	0.95387	0.01619
6.83333	0.970687	0.884113	0.994512	0.967656	1.03519	0.988929	0.990309	0.956736	0.97352	0.01528
6.86667	0.965343	0.981787	0.979607	0.957227	0.949852	0.97739	0.985778	1.01428	0.97641	0.00702
6.9	0.970735	0.895779	0.983864		0.949474	0.971359	0.990122	0.993155	0.96493	0.0128
6.93333	0.968318	0.985863	0.980196	0.966229	0.921532	0.978522	0.985587	1.01082	0.97463	0.009
6.96667	0.953162	0.981536	0.971231	0.969253	0.95471	0.966529	0.989036	1.0034	0.97361	0.00603
7	0.956521	0.977258	0.968228	0.953623	0.979967	0.975936	0.994009	1.00361	0.97614	0.00604
7.03333	0.93996	0.980745	0.975192	0.962831	0.951593	0.985866	0.994334	0.984124	0.97183	0.00662
7.06667	0.950618	0.975398	0.976526	0.951571	0.957474	0.969875	0.997786	0.990305	0.97119	0.00615
7.1	0.949896	0.97788	0.975649	0.967192	0.916203	0.975046	0.984807	0.992484	0.96739	0.00855
7.13333	0.954293	0.974852	0.981344	0.955095	0.957095	0.973698	0.992169	0.992308	0.97261	0.00557
7.16667	0.951474	0.968648	0.980092	0.960774	1.03449	0.980143	1.00527	0.993881	0.98435	0.00941
7.2	0.956784	0.981438	0.974412	0.950884	1.04359	0.973782	0.978896	0.992001	0.98147	0.01003
7.23333	0.963005	0.963444	0.974163	0.950084	0.997185	0.969671	0.992819	0.978733	0.97364	0.00557
7.26667	0.975624	0.966224	0.983479	0.968094	1.03138	0.976185	0.988761	0.983332	0.98414	0.00728
7.3	0.967329	0.961722	0.973167	0.960838	0.987062	0.978413	0.987832	0.981258	0.9747	0.00378
7.33333	0.972252	0.955498	0.973407	0.966908	0.967511	0.97169	0.992757	0.986474	0.97331	0.00411
7.36667	0.975262	0.970708	0.976465	0.962557	0.949007	0.984499	0.9882	0.997105	0.97548	0.00535
7.4	0.968273	0.967648	0.975296	0.961426	1.07203	0.975007	0.982851	1.00715	0.98871	0.01288
7.43333	0.974333	0.978673	0.971014	0.958564	0.894933	0.982133	0.980723	1.00846	0.9686	0.01164
7.46667	0.98091	0.823623	0.990837	0.949804	0.939849	0.986718	0.978677	0.997852	0.95603	0.02021
7.5	0.977402	0.989324	0.985335	0.96341	1.02864	0.984934	0.979625	1.00247	0.98889	0.00689
7.53333	0.975714	0.976308	0.994057	0.960361	1.08104	0.992102	0.978813	0.997613	0.9945	0.01309
7.56667	0.970732	0.873406	0.992631	0.947067	1.07812	0.990574	0.971444	1.00128	0.97816	0.02024
7.6	0.968674	0.984096	0.986077	0.939747	1.08438	0.984531	0.979939	0.935742	0.9829	0.01615
7.63333	0.962595	0.983784	0.954052	0.956455	0.963555	0.999021	0.974032	0.987115	0.97258	0.0057
7.66667	0.970518	0.96522	0.962797	0.967993	1.08368	0.976518	0.972886	0.844676	0.96804	0.02265
7.7	0.96422	0.844814	0.956848		0.882743	0.981499	0.961831	1.01498	0.94385	0.02232
7.73333	0.965319	0.975049	0.964783	0.948654	1.06877	0.9785	0.966392	1.00765	0.98439	0.01345
7.76667	0.959713	0.969222	0.987113	0.957743	1.08433	0.979606	0.966346	1.00862	0.98909	0.01482
7.8	0.952488	0.864193	0.986511	0.952316	0.883653	0.987162	0.982119	1.01077	0.9524	0.0185
7.83333	0.956718	0.983276	0.988228	0.955927	1.0853	0.983087	0.975975	0.875118	0.97545	0.02033
7.86667	0.956912	0.985207	0.972059	0.964597	0.886906	0.977379	0.978824	1.01112	0.96663	0.01273
7.9	0.949705	0.978115	0.988387		1.07179	0.985387	0.98017	1.01072	0.9949	0.01451
7.93333	0.958555	0.979161	0.964873	0.944102	1.06812	0.985274	0.978469	1.00769	0.98578	0.01354
7.96667	0.965293	0.974263	0.975845	0.961708	1.06533	0.994331	0.991307	1.00422	0.99154	0.01175
8	0.957571	0.968746	0.986017	0.938055	0.892359	0.993075	0.978764	0.86187	0.94706	0.01666
8.03333	0.956359	0.971221	0.969606	0.958081	1.0535	0.994139	0.981124	1.01311	0.98714	0.01159
8.06667	0.954236	0.986776	0.963264	0.947066	0.982036	0.999926	0.980143	1.00254	0.977	0.00721
8.1	0.962407	0.980219	0.968027	0.966052	1.04858	0.992649	0.981248	1.02115	0.99004	0.01069
8.13333	0.957891	0.975904	0.955333		1.04199	0.987673	0.97441	1.00129	0.98493	0.01127
8.16667	0.961857	0.965907	0.958106	0.96125	1.05499	0.981032	1.0009	0.795408	0.95993	0.02614
8.2	0.960455	0.973343	0.962151	0.977713	0.871742	0.982187	0.991288	0.802471	0.94017	0.02369
8.23333	0.958436	0.981761	0.860057	0.953205	1.05185	0.98092	1.00004	0.791477	0.94722	0.0293
8.26667	0.957544	0.969073	0.959765	0.955006	0.961681	0.965988	0.993939	0.789073	0.94401	0.02255
8.3	0.949628	0.978202	0.957813	0.957328	1.04603	0.970481	0.984271	0.983668	0.97843	0.01069
8.33333	0.951211	0.961104	0.956773	0.972911	1.04437	0.966437	0.96129	0.993538	0.97595	0.01078
8.36667	0.948104	0.971959	0.946799	0.9672	1.05179	0.973371	0.976688	0.987044	0.97787	0.01163
8.4	0.960836	0.96894	0.958937	0.950478	1.03613	0.970602	0.985815	0.997579	0.97866	0.00979
8.43333	0.968519	0.967559	0.943795	0.96001	1.04026	0.970759	0.982794	1.00377	0.97968	0.01059
8.46667	0.956461	0.974842	0.951775	0.970178	0.927945	0.968752	0.984379	0.976854	0.9639	0.00636
8.5	0.95801	0.979969	0.957068	0.96636	1.04634	0.975648	0.969766	0.975901	0.97863	0.01011
8.53333	0.952971	0.980569	0.970024	0.982903	1.03761	0.973585	0.972303	0.880007	0.96875	0.01538
8.56667	0.962022	0.972521	0.970808	0.963092	1.05953	0.975535	0.98116	0.998125	0.98535	0.01133
8.6	0.97175	0.977576	0.965174	0.983755	1.03968	0.971101	0.981407	0.991573	0.98525	0.00831
8.63333	0.965132	0.958904	0.961467		1.05896	0.963596	0.976025	0.983062	0.98102	0.01339
8.66667	0.964408	0.957191	0.96705	0.9651	0.989991	0.971169	0.96691	0.976338	0.96977	0.00348
8.7	0.964299	0.948683	0.952835	0.982926	0.996936	0.976956	0.987275	0.983169	0.97413	0.00606
8.73333	0.960988	0.951915	0.949215	0.978062	1.02618	0.960495	0.992412	0.981745	0.97513	0.00905
8.76667	0.966492	0.946072	0.86959	0.96355	0.848069	0.964764	0.987304	0.986538	0.94155	0.01876
8.8	0.967591	0.967328	0.955276	0.971338	1.02904	0.9769	0.988051	0.9741	0.9787	0.00791
8.83333	0.964067	0.938879	0.945188	0.960516	1.02859	0.977391	0.99144	0.980152	0.97328	0.01007
8.86667	0.96457	0.953259	0.950224	0.969898	1.03391	0.964593	0.990099	0.991899	0.97731	0.0097
8.9	0.96542	0.953495	0.949547	0.972249	1.02458	0.957636	0.974053	0.991233	0.97353	0.00868
8.93333	0.967967	0.948324	0.94183		0.88221	0.955731	0.982417	0.988199	0.95238	0.01336
8.96667	0.95433	0.867341	0.948683	0.98387	1.03696	0.951914	0.983462	0.989807	0.96455	0.01721
9	0.963175	0.879547	0.94667	0.979484	1.02693	0.954516	0.976333	0.985769	0.96405	0.01485
9.03333	0.96028	0.97363	0.959474	0.993335	1.03037	0.95067	0.975123	0.99746	0.98004	0.00921
9.06667	0.960879	0.988293	0.959974	0.985858	1.03448	0.950463	0.979003	0.995229	0.98177	0.00937
9.1	0.953918	0.840868	0.95792	0.961204	1.02869	0.954941	0.97514	0.98109	0.95672	0.01869
9.13333	0.96329	0.990382	0.95447	0.984856	1.03312	0.957246	0.976595	1.00097	0.98262	0.00926
9.16667	0.973417	0.953566	0.973131	0.987284	1.01733	0.962494	0.967472	0.974611	0.97616	0.00683
9.2	0.968921	0.978414	0.960678	0.973556	1.02567	0.976829	0.964262	0.981997	0.97879	0.00717
9.23333	0.968414	0.989291	0.954325	0.980077	1.02023	0.979129	0.975154	0.981232	0.98098	0.0067
9.26667	0.976094	0.94417	0.950129	0.970542	1.02828	0.969324	0.97262	0.98148	0.97408	0.00897
9.3	0.983517	0.956261	0.959745	0.979745	1.02968	0.975252	0.973575	0.992545	0.98129	0.00809
9.33333	0.980744	0.952164	0.958673	0.96999	1.02795	0.977431	0.951136		0.97401	0.01002
9.36667	0.972828	0.95538	0.786066	0.963892	1.03729	0.965062	0.964834	0.982704	0.95351	0.02558
9.4	0.956554	0.997908	0.963425	0.965563	1.03516	0.979005	0.971979		0.98137	0.01029
9.43333	0.980069	0.957552	0.957022	0.977481	1.02643	0.98499	0.964369	0.98604	0.97924	0.0079
9.46667	0.978627	0.947687	0.955706	0.978663	0.90276	0.974528	0.962518	0.999885	0.96255	0.01026
9.5	0.97275	0.955826	0.957944	0.96514	0.876838	0.976633	0.971528	1.00211	0.95985	0.01289
9.53333	0.964848	0.95102		0.981705	0.863562	0.984877	0.961678	0.971149	0.95412	0.01572
9.56667	0.969856	0.952803	0.954351	0.968024	0.940551	0.97524	0.97	0.982114	0.96412	0.00484
9.6	0.955814	0.948083	0.945284	0.973527	0.973495	0.972999	0.972357	0.989817	0.96642	0.00538
9.63333	0.959962	0.960101	0.964871	0.959663	0.928739	0.96665	0.977727	0.985046	0.96284	0.00586
9.66667	0.957284	0.953085	0.925184	0.953813	0.96446	0.960383	0.983521	0.981426	0.95989	0.00646
9.7	0.941662	0.95941	0.935547	0.959258	0.960402	0.967952	0.982741	0.976895	0.96048	0.00567
9.73333	0.944817	0.949392	0.951862	0.956409	0.938005	0.967766	0.989541	0.99066	0.96106	0.00703
9.76667	0.946334	0.953422	0.961289	0.969637	0.877346	0.973772	0.990669	0.999376	0.95898	0.01325
9.8	0.958711	0.958172	0.95291	0.966374	0.942532	0.976487	0.914104	0.97153	0.9551	0.00697
9.83333	0.958333	0.954564		0.967374	0.913181	0.9709	0.991573	0.977511	0.96192	0.00935
9.86667	0.947092	0.961896		0.980732	0.993932	0.977835	0.995291	0.975104	0.97598	0.00646
9.9	0.951879	0.959249		0.970951	0.992475	0.977499	0.994717	0.985869	0.97609	0.00619
9.93333	0.953184	0.957978		0.979919	0.922299	0.984514	0.991528	0.981652	0.9673	0.00921
9.96667	0.951656	0.957319	0.854949	0.969529	1.036	0.979732	0.993251	0.971745	0.96427	0.01816
10	0.951083	0.957289		0.980211	1.03138	0.989661	0.998323	0.977697	0.98366	0.01016
10.0333		0.974321		0.975407	1.06307	0.990817	0.984948	0.975039	0.99393	0.01409
10.0667	0.95595	0.779668		0.972817		0.992042	0.862843	0.977592	0.92349	0.03439
10.1	0.946893	0.983587		0.970508	1.03219	0.978361	0.980151	0.967919	0.97994	0.00985
10.1333	0.944571	0.970964		0.969096	1.03788	0.988726	0.987659	0.97075	0.98138	0.01093
10.1667	0.958116	0.964477		0.969336	1.03436	0.986912	0.985371	0.972492	0.98158	0.00964
10.2	0.955126	0.965285	0.956405	0.974271	1.03757	0.97867	0.985448	0.982461	0.9794	0.00923
10.2333	0.953681	0.973649	0.959861	0.971046	1.03902	0.981371	0.971828	0.974527	0.97812	0.00923
10.2667	0.968124	0.9746	0.962909	0.960455		0.970344	0.978298	0.966876	0.9688	0.00236
10.3	0.961541	0.965312	0.946403			0.96879	0.980991	0.971609	0.96577	0.00472
10.3333	0.958769	0.965908	0.938803	0.949065	1.04312	0.976659	0.972502	0.967203	0.9715	0.01113
10.3667	0.962491	0.962295	0.937632			0.980411	0.977652		0.9641	0.0076
10.4	0.957195	0.946959	0.929384	0.958871	1.03483	0.966338	0.98854	0.983427	0.97069	0.01134
10.4333	0.95635	0.952601	0.919798	0.959198	1.03417	0.974814	0.981473	0.979515	0.96974	0.01156
10.4667	0.949938	0.961681	0.928413	0.946691	1.04802	0.973289	0.977135	0.887766	0.95912	0.01621
10.5	0.954628	0.96757	0.921561	0.957754	1.02916	0.961631	0.932665	0.982884	0.96348	0.01159
10.5333	0.943118	0.96665	0.89606	0.970484	1.04555	0.95881	0.944473	0.971166	0.96204	0.01475
10.5667	0.950608	0.966102	0.897765	0.957121		0.956495	0.976258	0.972516	0.95384	0.00997
10.6	0.952462	0.965564	0.88241	0.960645	1.0468	0.94884	0.985503	0.976596	0.96485	0.01609
10.6333	0.938419	0.963567	0.876593	0.957858	1.0398	0.962101	0.977387	0.988276	0.963	0.01628
10.6667	0.947381	0.946414	0.877869	0.976562	1.04555	0.949524	0.979787	0.972734	0.96198	0.01654
10.7	0.962327	0.952735	0.87083	0.971372	1.04826	0.957978	0.994178	0.979942	0.9672	0.01747
10.7333	0.95442	0.937797	0.875306	0.965899	1.05632	0.959527	0.922232	0.984127	0.95695	0.01839
10.7667	0.954401	0.958205	0.874491	0.96686	1.04377	0.977171	0.995439	0.984815	0.96939	0.01683
10.8	0.946601	0.967689		0.947697	1.04638	0.979496		0.979645	0.97792	0.01493
10.8333	0.951949	0.958749	0.880166	0.953233	1.04769	0.974542	0.98187	0.985754	0.96674	0.01646
10.8667	0.949187	0.971551	0.886256	0.959646	1.04736	0.979531	0.983714	0.980968	0.96978	0.01578
10.9	0.954883	0.970085		0.959008	1.03661	0.984678	0.981506	0.990083	0.98241	0.0103
10.9333	0.939951	0.955512		0.964246	1.0356	0.988606	0.979078	0.97883	0.9774	0.01152
10.9667	0.943683	0.972013		0.959549	1.03203	0.973778	0.960977	0.982485	0.97493	0.01062
11	0.943116	0.972079		0.956873	1.03426	0.977668	0.962145	0.986159	0.97604	0.01108
11.0333	0.950062	0.978598		0.964495	1.02954	0.974962	0.966147	0.989672	0.97907	0.00963
11.0667	0.945492	0.966655		0.973134	1.03362	0.975298	0.948923	0.982027	0.97502	0.01103
11.1	0.937722	0.967917		0.953476		0.970599	0.953287	0.993124	0.96269	0.00777
11.1333	0.93813	0.962832		0.963682	1.04344	0.96932	0.948001	0.987807	0.97332	0.01312
11.1667	0.929216	0.97716		0.954326		0.976824	0.957438	0.993512	0.96475	0.00922
11.2	0.938418	0.965283		0.967138	1.03627	0.974332	0.963894	0.991829	0.97674	0.01158
11.2333	0.927902	0.961122		0.946879		0.972383	0.968593		0.95538	0.00814
11.2667	0.938839	0.965114		0.889746	1.0356	0.973138	0.968828		0.96188	0.01945
11.3	0.933129	0.965666		0.801813	1.02927	0.96479	0.971641	0.995337	0.95166	0.02738
11.3333	0.936954	0.976183		0.986253	1.04317	0.968928	0.985426	0.985189	0.98316	0.01196
11.3667	0.935431	0.953295		0.972055	1.04057	0.956388	0.985255		0.97383	0.01504
11.4	0.930911	0.961563	0.921058	0.971205	1.03578	0.946775	0.982346		0.96423	0.01446
11.4333	0.932569	0.954338		0.850644	1.04047	0.960378	0.986735	0.975466	0.95723	0.02189
11.4667	0.933602	0.953756		0.970444	1.01819	0.959333	0.986599	0.975961	0.97113	0.01015
11.5	0.929461	0.966663	0.931863	0.970906	1.03492	0.960222	0.982546	0.993868	0.97131	0.01205
11.5333	0.931665	0.959932	0.958816		0.86206	0.962492	0.98665	0.973733	0.94791	0.01564
11.5667	0.943788	0.968239	0.938847	0.969232	0.920949	0.963209	0.985566	0.965054	0.95686	0.00732
11.6	0.941541	0.981603	0.956465	0.966219		0.964602	0.989973	0.971314	0.96739	0.00602
11.6333	0.940434	0.974016	0.963294	0.963318	1.05341	0.965159	0.984753	0.970615	0.97688	0.0118
11.6667	0.945218	0.979735	0.971801	0.970157	1.05901	0.948102	0.986358	0.968861	0.97866	0.01252
11.7	0.937714	0.969006	0.969769		1.05741	0.957843	0.984165	0.965387	0.97733	0.01437
11.7333	0.952891	0.975648	0.959548			0.96163	0.973366	0.973567	0.96611	0.00382
11.7667	0.958088	0.969501	0.852196	0.96158	1.05668	0.980719	0.989494	0.965381	0.9667	0.01984
11.8	0.952131	0.979726	0.956849	0.974082	1.04829	0.980548	0.976887	0.967323	0.97948	0.0105
11.8333	0.950576	0.982091	0.964781	0.964784	1.05857	0.979702	0.95661	0.955245	0.97654	0.01237
11.8667	0.961234	0.994672	0.957191	0.955845	1.0499	0.981226	0.95219	0.950948	0.9754	0.01196
11.9	0.95007	0.982016	0.943659	0.978079		0.986736	0.925932	0.963809	0.96147	0.00852
11.9333	0.962593	0.983054	0.946471	0.972411	1.04687	0.98833	0.974153	0.973604	0.98094	0.01044
11.9667	0.961147	0.99414	0.945181	0.963518	1.05174	0.98638	0.977729	0.969566	0.98118	0.01144
12	0.962182	0.986478	0.94512	0.961012	1.04553	0.977236	0.971415	0.962594	0.97645	0.01078
12.0333	0.957285	0.989351	0.945589	0.959545	1.04751	0.974863	0.978768	0.968231	0.97764	0.01109
12.0667	0.961029	0.98421	0.947542	0.973182	1.04375	0.985934	0.967187	0.968085	0.97886	0.01024
12.1	0.959974	0.992165	0.945662	0.967163		0.983299	0.98316	0.983888	0.97362	0.00626
12.1333	0.953377	0.992386	0.932249	0.974366		0.973252	0.973282	0.977611	0.96807	0.00736
12.1667	0.961622	0.99317	0.936676	0.963548		0.978329	0.973602	0.992613	0.97137	0.00746
12.2	0.949316	0.981088	0.947356	0.958572	1.02036	0.974764	0.963658	0.977939	0.97163	0.00828
12.2333	0.960184	0.989616	0.84218	0.988498		0.9806	0.973447		0.95575	0.02314
12.2667	0.962097	0.986144	0.854402	0.978804	1.01203	0.970121	0.965042	0.989973	0.96483	0.01676
12.3	0.967767	0.985218	0.957376		1.01146	0.97177	0.976229	0.998249	0.98115	0.00704
12.3333	0.97677	0.974636	0.961453	0.97618		0.966952	0.974418	0.98178	0.97317	0.00256
12.3667	0.977725	0.976014	0.802865	0.991669		0.964974	0.982257	0.996458	0.95599	0.02582
12.4	0.978252	0.974629	0.959999	0.985136		0.959412	0.983323		0.97346	0.00461
12.4333	0.982286	0.97175	0.968936	0.998166		0.951212	0.975271		0.9746	0.00633
12.4667	0.973743	0.966011	0.968603	0.98641		0.952236	0.977958	0.984358	0.97276	0.00445
12.5	0.979514	0.979798	0.966677	0.975098		0.959342	0.983514	0.981141	0.97501	0.00334
12.5333	0.984986	0.978836	0.789259	0.976659		0.954729	0.98614	0.983989	0.95066	0.0272
12.5667	0.978939	0.981738	0.966561	0.956533	0.903568	0.956008	0.974168	0.980129	0.96221	0.00912
12.6	0.974762	0.979492	0.960194	0.965279		0.960554	0.985877		0.97103	0.00434
12.6333	0.982705	0.959782	0.959785	0.941808	0.959925	0.953816	0.98383	0.996505	0.96727	0.0065
12.6667	0.981604	0.976	0.962863	0.959466	0.97605	0.946433	0.984705		0.96959	0.00521
12.7	0.9777	0.969841	0.963106	0.965785	0.953715	0.956051	0.983773		0.96714	0.00413
12.7333	0.979293	0.979185	0.9789	0.954442		0.966912	0.997392		0.97602	0.00587
12.7667	0.968693	0.967953	0.973308	0.963168		0.969425	1.00312	0.982285	0.97542	0.00513
12.8	0.974852	0.960146	0.970814	0.975425	0.977711	0.965437	0.990999	0.978335	0.97421	0.00327
12.8333	0.977383	0.95715	0.959819	0.97822		0.972819	0.998172	0.97764	0.97446	0.00514
12.8667	0.973796	0.961443		0.962107	0.924799	0.972875	0.982717		0.96296	0.0083
12.9	0.968171	0.965645	0.947476	0.953279		0.975572	0.984216	0.979245	0.96766	0.00509
12.9333	0.965628	0.966974	0.944721	0.964174	1.02175	0.971522	0.973451	0.984204	0.97405	0.00786
12.9667	0.959166	0.963951	0.940925	0.984341	1.04554	0.976813	0.983006	0.965187	0.97737	0.01095
13	0.961451	0.959413	0.943756	0.965206	1.04525	0.979577	0.827701	0.970194	0.95657	0.02132
13.0333	0.958596	0.966759	0.954838	0.967864	1.05001	0.983686	0.984964	0.966309	0.97913	0.0108
13.0667	0.954739	0.971073	0.941612	0.878059	1.04674	0.979939	0.986474	0.973995	0.96658	0.01673
13.1	0.953416	0.974361	0.945286	0.974311	1.05058	0.973434	0.992549	0.962716	0.97833	0.01152
13.1333	0.955158	0.978284	0.957311	0.960997	1.05744	0.975105	0.96762	0.972843	0.9781	0.01172
13.1667	0.953167	0.980025	0.959261	0.901664	1.05126	0.96857	0.978598	0.979099	0.97146	0.01459
13.2	0.955128	0.960691	0.952951	0.952254	1.04449	0.970799	0.979771	0.980959	0.97463	0.01078
13.2333	0.965317		0.956447	0.983809	1.05127	0.975603	0.9838	0.979897	0.98516	0.01166
13.2667	0.969661	0.985202	0.951132	0.96495	1.06116	0.971095	0.979863	0.981674	0.98309	0.01179
13.3	0.96822	0.978088	0.942863	0.968219	1.05398	0.973182	0.985971	0.986313	0.9821	0.01135
13.3333	0.96857	0.980919	0.961136	0.985715	1.06546	0.980822	0.968303	0.986208	0.98714	0.01164
13.3667	0.972901	0.991377	0.93948	0.983044	1.05745	0.977431	0.969307	0.992199	0.9854	0.01185
13.4	0.975621	0.984034	0.943325	0.96967	1.05304	0.975256	0.977044	0.992649	0.98383	0.0111
13.4333	0.963658	0.983189	0.958562	0.994023	1.05715	0.981744	0.967252	0.987072	0.98658	0.01098
13.4667	0.971328	0.991543	0.958932	0.982156	1.04778	0.979593	0.980826	0.98406	0.98703	0.00933
13.5	0.965308	0.976097	0.957303			0.97702	0.985155	0.99619	0.97618	0.00565
13.5333	0.967195	0.980358	0.958344		1.03127	0.986013	0.983458	0.995789	0.98606	0.00887
13.5667	0.976279	0.992792	0.958238		1.05121	0.989407	0.984722	0.99473	0.99248	0.01087
13.6	0.971626	0.991996	0.971005		1.02465	1.00118	0.980221	0.994171	0.99069	0.00713
13.6333	0.981087	0.973982	0.968715			0.993934	0.983438	0.992187	0.98222	0.00404
13.6667	0.973073	0.979543	0.966345			0.998432	0.969822	0.991624	0.97981	0.00521
13.7	0.980998	0.972355	0.971405	1.01326	1.03942	0.99521	0.976906	1.00261	0.99402	0.0084
13.7333	0.972733	0.972192	0.972084		1.04097	0.995781	0.966157	0.993695	0.98766	0.00989
13.7667	0.983608	0.991625	0.976438		1.03449	0.993807	0.961817	0.98407	0.98941	0.00852
13.8	0.968374	0.984279	0.980088	1.00283	1.03651	0.995547	0.975727	0.995728	0.99239	0.0075
13.8333	0.968796	0.99202	0.959323	0.981929	1.03976	1.00005	0.966923	0.993843	0.98783	0.00901
13.8667	0.978624	0.981267	0.966273		1.02653	0.998325	0.970868	0.986295	0.98688	0.00769
13.9	0.964429	0.947551		1.01326	1.03194	1.00149	0.966341	0.988037	0.98758	0.01135
13.9333	0.965041	0.980715	0.966062	1.00544	1.02148	0.989098	0.97396	0.990082	0.98648	0.00691
13.9667	0.96948	0.979218	0.987824	0.96279	0.950115	0.983503	0.976066	0.987615	0.97458	0.00465
14	0.956255	0.979473	0.988279	0.925508		0.970708	0.978107	0.985969	0.96919	0.00832
14.0333	0.970144	0.964013	0.955736	0.989708	1.0377	0.962921	0.927609	0.986276	0.97426	0.01132
14.0667	0.954379	0.944956	0.962243	0.947577	1.02625	0.976927	0.823377	0.984369	0.95251	0.02066
14.1	0.960172	0.940651	0.956897	0.975669	1.03055	0.967558	0.833257	0.993531	0.95729	0.02017
14.1333	0.94322	0.941454	0.951152	0.989457		0.965364	0.8504	1.00144	0.94893	0.01856
14.1667	0.953872	0.966764	0.957084	0.982293	1.03958	0.961592	0.941505	0.989066	0.97397	0.01082
14.2	0.945993	0.976952	0.968242	0.984795	1.03153	0.966348	0.969919	0.993083	0.97961	0.0089
14.2333	0.959819	0.9779	0.958062		1.04005	0.956259	0.984255	0.987333	0.98052	0.01105
14.2667	0.946706	0.98126	0.952958	0.975843	1.04993	0.962488	0.983387	0.999888	0.98156	0.01153
14.3	0.954102	0.973416	0.952368	0.966773	1.0426	0.973364	0.986901	1.00431	0.98173	0.01055
14.3333	0.953878	0.972626	0.956349	0.937729	1.05119	0.966918	0.98815		0.97526	0.014
14.3667	0.950541	0.983314	0.950228	0.931792	1.03985	0.970174	0.990942	0.996844	0.97671	0.01202
14.4	0.949417	0.979102	0.953633		1.04788	0.984324	0.989182	0.994376	0.98542	0.01229
14.4333	0.954183	0.976459	0.95301	0.856679	1.05532	0.973162	0.989857	1.0069	0.9707	0.02003
14.4667	0.95309	0.982886	0.960345	0.966953	1.0494	0.976575	0.977504	0.989676	0.98205	0.01051
14.5	0.970749	0.980108	0.9504	0.82761	1.05776	0.991771	0.968961	1.00197	0.96867	0.02312
14.5333	0.976708	0.97483	0.950537	0.970768	1.05571	0.981885	0.990121	0.996055	0.98708	0.01093
14.5667	0.975319	0.984325	0.954344	0.977394	1.05191	0.973521	0.99937		0.98803	0.01179
14.6	0.972449	0.98359	0.949788	0.985508	1.05625	0.99301	0.98836	0.996545	0.99069	0.01071
14.6333	0.981026	0.984423	0.95639	0.973683	1.05613	0.990926	0.983835	1.01239	0.99235	0.01067
14.6667	0.977211	0.977624	0.943315	0.973718	1.03522	0.986122	0.989056	1.00434	0.98582	0.00934
14.7	0.985616	0.980999	0.948096	0.984933	1.04886	0.994178	0.992949	0.999925	0.99194	0.00986
14.7333	0.986091	0.98717	0.936551	0.969172	1.05103	0.995107	1.00099		0.98944	0.01308
14.7667	0.978205	0.969754	0.941646	0.972222	1.04628	0.996602	0.98636	0.997549	0.98608	0.01066
14.8	0.970826	0.98005	0.951772	0.957432		0.989988	0.996871	0.997262	0.97774	0.00696
14.8333	0.949212	0.976294	0.95332	0.949062	1.03678	0.996464	1.00015	1.01087	0.98402	0.01146
14.8667	0.960317	0.98138	0.948355	0.958708	1.0436	0.990055	0.994882		0.98247	0.01212
14.9	0.956825	0.979528	0.952381	0.951088		0.989445	0.987982	0.999962	0.97389	0.0076
14.9333	0.961869	0.963987	0.954474		1.05496	0.984777	0.994717	0.998998	0.98768	0.01295
14.9667	0.966862	0.945565	0.960982	0.973597	1.0556	0.98961	1.00402	0.994782	0.98638	0.01198
15	0.95446	0.95886	0.946642	0.962752		0.994421	1.00045	1.00084	0.97406	0.00889
15.0333	0.959673	0.971614	0.959917		1.08392	0.980017	0.995797	1.00962	0.99436	0.01645
15.0667	0.955479	0.976072	0.964886	0.965289	1.06857	0.976517	0.983251	0.99758	0.98596	0.01264
15.1	0.966156	0.981475	0.975916	0.960323		0.982072	0.989242	1.00861	0.98054	0.00598
15.1333	0.966877		0.972929	0.971751	1.06805	0.977537	0.981907	1.00705	0.9923	0.01356
15.1667	0.963861	0.966884	0.976941	0.902896	1.06651	0.978041	0.985526	0.986975	0.97845	0.01577
15.2	0.97183		0.913654	0.976609	1.05386	0.988456	0.99745	1.00817	0.98715	0.016
15.2333	0.971963	0.986905	0.977926	0.847221	1.05168	0.984181	0.972657	0.99677	0.97366	0.02023
15.2667	0.971857	0.987088	0.967631	0.928241	1.06369	0.985021	0.976689	0.997143	0.98467	0.01343
15.3	0.968065	0.984518	0.843328	0.979351		0.987104	0.97271	0.978619	0.9591	0.01945
15.3333	0.971499	1.00554	0.977691	0.887325		1.00532	0.965823	0.975031	0.96975	0.015
15.3667	0.975527	0.997534	0.966397	0.999841		0.99148	0.96324	0.985654	0.98281	0.00555
15.4	0.971342	0.991858	0.917777	0.799306		0.997351	0.968069	0.978292	0.94628	0.02638
15.4333	0.97456	0.989087	0.966727	0.997519	1.05186	0.993008	0.965871	0.956036	0.98683	0.01063
15.4667	0.983853		0.974772	0.845891	1.04601	0.969295	0.960718	0.937796	0.95976	0.02277
15.5	0.979153	0.990307	0.961729	0.872316		0.984149	0.966303	0.939053	0.95614	0.01538
15.5333	0.976765	0.985451	0.980408	1.02597		0.984252	0.979775	0.937183	0.9814	0.00975
15.5667	0.974609	0.98621	0.967056	0.80793	1.03749	0.98893	0.9799		0.96316	0.02727
15.6	0.966086	0.976045	0.964081		1.0485	0.98579	0.974308	0.969142	0.98342	0.01119
15.6333	0.973848	0.984624	0.959565	0.98885	1.03155	0.989053	0.963395	0.980417	0.98391	0.00785
15.6667	0.970846	0.98853	0.965308	0.892033	1.04637	0.987388	0.958373	0.901643	0.96381	0.01746
15.7	0.977229	0.987089	0.967792	0.87		0.981758	0.974891	0.9814	0.96288	0.01565
15.7333	0.966075	0.98774	0.964478	0.855047	1.06388	0.992935	0.974861		0.97215	0.02335
15.7667	0.98462	0.991571	0.975245	0.963651		0.980825	0.985017	0.887516	0.96692	0.01365
15.8	0.977167	0.99089	0.968511	1.02119	0.961129	0.98864	0.979658	0.993458	0.98508	0.00649
15.8333	0.978372	0.99227	0.978064	0.833111	1.04875	0.973738	0.982364	0.887353	0.95925	0.02377
15.8667	0.989956	0.988304	0.977542	1.00164	0.955633	0.970881	0.999754	0.999301	0.98538	0.00575
15.9	0.979745	0.989876	0.971881	0.975644	0.960054	0.984157	0.993541	1.00757	0.98281	0.00514
15.9333	0.971436	0.93513	0.972955	0.801167	0.96369	0.972913	0.992987	1.00561	0.95199	0.02275
15.9667	0.981354	0.988852	0.967551	0.934035		0.974089	0.984211	1.01286	0.97756	0.00905
16	0.974451	1.00026	0.973428	0.840332	0.952777	0.977396	0.96759	1.01328	0.96244	0.01868
16.0333	0.964068	0.969837	0.975142	0.899792	0.96084	0.970362	0.965369	1.00462	0.96375	0.01034
16.0667	0.944709	0.972595	0.973954			0.96269	0.959706	1.00156	0.9692	0.00777
16.1	0.972415	0.983294	0.966638	0.798791	0.960274	0.966233	0.955465	1.00704	0.95127	0.02252
16.1333	0.97299	0.991728	0.971832	0.987128	0.958704	0.968304	0.964352	0.995024	0.97626	0.00473
16.1667	0.987733	1.0001	0.973142	0.861097	1.05048	0.964028	0.968028	1.00128	0.97574	0.01905
16.2	0.992981	0.992745	0.964859	0.917247	0.963656	0.973883	0.964755	1.00305	0.97165	0.00946
16.2333	0.987672	0.995954	0.973136		1.04271	0.984477	0.979498	1.00862	0.99601	0.00892
16.2667	0.980594	0.991527	0.957371		1.04216	0.978441	0.984397	1.00321	0.9911	0.01001
16.3	0.988656	1.00108	0.962053		0.960629	0.984764	0.981734	1.01035	0.98418	0.00697
16.3333	0.988097	0.992054	0.963242		1.0345	0.99414	0.979814	1.01582	0.99538	0.00885
16.3667	0.994375	0.994477	0.96897		1.03645	0.986338	0.967539	1.00283	0.993	0.00881
16.4	0.982783	0.999274	0.988475	0.834275	1.03729	0.989652	0.970887	0.982751	0.97317	0.02104
16.4333	0.984015	1.00529	0.973893	0.92362	1.02935	0.985518	0.966813	1.002	0.98381	0.01108
16.4667	0.983546	0.99336	0.983943	0.831051		0.988305	0.973609	1.00202	0.96512	0.02259
16.5	0.976459	1.00334	0.980419	0.96501	0.902005	0.998875	0.973559	0.987668	0.97342	0.01116
16.5333	0.985691		0.972423	0.915645	0.972827	0.988745	0.973923	0.99996	0.97274	0.01027
16.5667	0.986598	0.994489	0.971425	0.84292	0.898771	0.981704	0.982676	0.994762	0.95667	0.01963
16.6	0.977495	1.01051	0.977289	0.839131	1.02711	0.982953	0.980327	1.00168	0.97456	0.02038
16.6333	0.987347		0.968224	0.90088	1.02041	0.998519	0.867254		0.95711	0.02449
16.6667	0.988837		0.979985	0.988794	0.920701	0.984694	0.981193	0.998866	0.97758	0.00977
16.7	0.974515	1.00339	0.971798	0.848704	0.883654	0.990571	0.989042	1.00238	0.95801	0.0207
16.7333	0.967828	1.00214	0.976559	0.858856	1.01975	0.985798	0.97854	1.00929	0.97485	0.01772
16.7667	0.983885	1.01783	0.976285	0.846879	0.952618	0.977642	0.980623	1.00297	0.96734	0.01851
16.8	0.977162		0.970101	0.880204	1.01402	0.980674	0.994608	0.99889	0.97367	0.01656
16.8333	0.990648	1.01098	0.981682	0.962705	1.00921	0.980107	0.990371	0.993355	0.98988	0.00556
16.8667	0.984904		0.979947	0.962912	0.917521	0.974972	0.989036	0.999506	0.97269	0.01016
16.9	0.983377	1.00522	0.973943	0.960078	1.01294	0.985525	0.997549	0.991601	0.98878	0.00601
16.9333	0.985745	1.01656	0.97704	0.977319	1.01181	0.975921	0.984614	0.994218	0.9904	0.00562
16.9667	0.981752	1.01899	0.982203		0.919001	0.98178	0.983889	0.98673	0.97919	0.01124
17	0.978446	0.994636	0.968211	0.97892	1.01358	0.973045	0.987322	0.976606	0.98385	0.00514
17.0333	0.987085	1.00713	0.99004	0.973372	1.02789	0.983517	0.979018	0.987405	0.99193	0.0062
17.0667	0.989451	1.01382	0.979407	0.862684	1.03449	0.982585	0.987299		0.97853	0.02071
17.1	0.987664	1.01484	0.949578	0.981334	1.02086	0.982398	0.99022		0.98956	0.00892
17.1333	0.994231	1.00605	0.97444	0.982003		0.978927	0.981662		0.98622	0.00479
17.1667	0.987081	0.995608	0.974933	0.991522	0.949237	0.97527	0.994556		0.98117	0.00622
17.2	0.981503	0.99082	0.971136	0.908398	1.03138	0.978814	0.97481		0.97669	0.01373
17.2333	0.990432	1.00904	0.970368	0.993292	0.947284	0.973578	0.987619	1.00832	0.98499	0.00731
17.2667	0.990503	1.01056	0.96564	0.994957	0.933553	0.987385	0.988937	1.00723	0.98485	0.00878
17.3	0.983827	1.001	0.977544	0.988492	1.04046	0.983671	0.984107	1.0142	0.99666	0.00752
17.3333	0.998896	0.993439	0.961693	0.803493	0.902804	0.987253	1.00502	1.01695	0.95869	0.0255
17.3667	0.995031	1.01791	0.97837	0.81122	0.922041	0.998458	0.897849		0.94584	0.02779
17.4	0.996553	1.01139	0.933007	0.810029	0.879999	0.992815	0.988456	1.02253	0.95435	0.02644
17.4333	0.982799	1.01255	0.975411	0.993064	0.89433	0.998476	0.999097	1.01166	0.98342	0.0135
17.4667	0.992598	1.0137	0.974188	0.933413	0.912464	0.997765	1.00178	0.99719	0.97789	0.01275
17.5	0.981749	1.01015	0.976708	0.91721	0.927636	0.994331	0.99719	1.00908	0.97676	0.01259
17.5333	0.975842	1.01101	0.982047	0.923869	0.898941	0.986177	0.995419	1.01116	0.97306	0.01437
17.5667	0.980072	1.01892	0.910955	0.849571	0.910708	0.99714	1.0033	1.00848	0.95989	0.02176
17.6	0.973314	0.996338	0.982236	0.907647		0.998109	0.997716	1.00532	0.9801	0.01276
17.6333	0.967422	1.00881	0.993131	0.923016	0.839678	0.977304	0.999859	1.00704	0.96453	0.02041
17.6667	0.974769	1.00609	0.995282	0.910351	0.942301	0.985558	0.994226	1.01152	0.97751	0.01224
17.7	0.971523	1.00433	0.989237	0.937945	1.03279	0.982524	0.953236	1.00521	0.9846	0.01077
17.7333	0.97973	0.998337	0.990976	0.836588	1.0318	0.983224	0.983444	0.991711	0.97448	0.02054
17.7667	0.989815	0.99505	0.994735	0.923714	1.04885	0.973963	0.979983	0.98511	0.9864	0.01209
17.8	0.995919	0.997568	0.99903	0.897325	0.95519	0.986303	0.992851	0.998335	0.97781	0.01259
17.8333	0.99636	1.00627	0.999288		1.04142	0.980817	0.990581	0.999889	1.00209	0.00723
17.8667	0.995905	1.01002	0.994675	0.85822	1.03522	0.984854	0.994753	1.01437	0.986	0.01908
17.9	0.999258	0.996716	0.985709		1.04319	0.986695	0.994051	1.00022	1.00084	0.00738
17.9333	1.00038	1.01141	0.999659	0.837125	1.03055	0.981985	0.991769	1.00208	0.98187	0.02128
17.9667	0.999449	1.01195	0.987736	0.806356	0.831046	0.968291	1.0035	1.01603	0.95304	0.02987
18	0.991836	1.0108	0.983251	0.839933	1.05168	0.980046	0.994588	1.01859	0.98384	0.02214
18.0333	0.997541	1.01111	0.987854	0.851442	1.04589	0.978769	0.984698	1.01076	0.98351	0.0203
18.0667	0.995352	1.00431	0.98674		1.02878	0.969943	0.990623	1.00945	0.99788	0.00706
18.1	0.983175	1.0081	0.987077	0.850289	1.046	0.966443	1.00391	1.01143	0.98205	0.02059
18.1333	0.984256		0.980655	0.911885	0.942081	0.970555	1.00079	1.0028	0.97043	0.01244
18.1667	0.996108	1.01368	0.986052		0.945337	0.969305	0.993161	1.01288	0.98808	0.00919
18.2	0.986704	1.02055	0.983696	0.825682	1.02616	0.968488	0.997671	1.00068	0.9762	0.02252
18.2333	0.991973	1.01815	0.979526	0.83009	1.02713	0.971527	1.00282	1.0082	0.97868	0.02223
18.2667	0.990493	1.00843	0.972301		0.896684	0.963104	1.00225	1.01434	0.97823	0.01532
18.3	0.987635	1.00843	0.984288		0.904972	0.974904	0.994176	1.00892	0.98048	0.01343
18.3333	0.976409	1.01095	0.97768	0.830222	1.03773	0.968886	0.999845	1.01214	0.97673	0.02244
18.3667	0.966478	1.00058	0.983007		1.04452	0.968282	1.0021	1.00294	0.99542	0.01008
18.4	0.971503	0.996695	0.989367		0.878103	0.961282	0.997546	1.0132	0.97253	0.01704
18.4333	0.972247	0.995495	0.980621	0.852657	1.0531	0.969019	1.00184	1.01057	0.97944	0.02044
18.4667	0.978548	1.01081	0.986368	0.968647	1.04892	0.963147	0.999435	0.992838	0.99359	0.00965
18.5	0.976818	1.0078	0.987812		1.05677	0.963518	1.01192	0.993069	0.99967	0.01143
18.5333	0.976652	1.0134	0.996368		1.06154	0.977307	1.01312	1.00123	1.00566	0.0109
18.5667	0.978929		0.977569		1.07181	0.981664	1.00534	1.00354	1.00314	0.01463
18.6	0.981713	1.02654	0.978245	0.896125	1.06713	0.982464	1.00232	1.01698	0.99394	0.01748
18.6333	0.977239	1.02629	0.982087		1.07819	0.976304	1.01419	1.00284	1.00816	0.01376
18.6667	0.983369	1.02831	0.996781	0.938657	0.93536	0.985323	1.00446	1.00288	0.98439	0.01144
18.7	0.985414	1.01757	0.999085	0.898859	1.00526	0.987338	1.00855	1.01012	0.98902	0.01346
18.7333	0.991496	1.01513	0.986537	0.886275	0.924956	0.98495	1.0015	0.999422	0.97378	0.01569
18.7667	0.987283	1.03312	0.97689	0.823357	0.916539	0.985059	0.999783	1.00925	0.96641	0.02362
18.8	0.983676	1.02325	0.979097	0.896124	0.931834	0.983947	0.995366	1.0124	0.97571	0.01488
18.8333	0.985285	1.02357	0.988908	0.833455	0.970274	0.979303	0.998974	1.01485	0.97433	0.02108
18.8667	0.993087		0.981626	0.862378	0.914084	0.982373	0.993586	1.00291	0.96144	0.01991
18.9	0.98193	1.0373	0.970426	0.975523	0.957823	0.993353	0.997817	0.99962	0.98922	0.00855
18.9333	0.984459	1.03893	0.975318	0.85563	0.931432	0.988062	0.995744	1.00284	0.97155	0.01964
18.9667	0.991757	1.04273	0.96828	0.946762	0.928916	0.983189	1.00334	1.01519	0.98502	0.01304
19	0.987069	1.03264	0.959357	0.865545	0.936217	0.993158	0.994034	1.02503	0.97413	0.01908
19.0333	0.990776	1.03074	0.956229	0.868383	0.933378	0.993541	1.006		0.96844	0.02059
19.0667	0.986577	1.03938	0.960701	0.842269	0.874608	0.980543	1.00408	1.0218	0.96374	0.02472
19.1	0.985792	1.02576	0.963281	0.897734	0.881785	0.999588	0.996782	1.01575	0.97081	0.01894
19.1333	0.991843	1.01975	0.844798	0.967111	0.863505	0.98234	1.00513	1.01085	0.96067	0.02403
19.1667	0.993926	1.02666	0.966951	0.966772	0.952846	0.987143	0.995441	1.00565	0.98692	0.00847
19.2	0.981998	1.02701	0.965014	0.944157	0.931255	0.985906	0.988323		0.97481	0.01197
19.2333	0.978229	1.01268	0.967328		0.871762	0.990334	0.998114	0.993285	0.9731	0.01775
19.2667	0.979764	0.997688	0.963304		0.832833	0.985104	0.999436	1.01192	0.96715	0.02315
19.3	0.974844	0.990828	0.951807	0.961122	1.06448	0.985852	1.0034		0.99033	0.01403
19.3333	0.954468	1.01068	0.962076		0.965444	1.00099	1.00859	1.01257	0.98783	0.00978
19.3667	0.943819	0.990639	0.964762	0.93748	0.83258	0.995599	1.00966	1.00761	0.96027	0.02069
19.4	0.963432	1.00852	0.961435	0.993946	0.952708	0.999938	1.00696		0.98385	0.00899
19.4333	0.984213	1.00033	0.967993	0.840441	0.936241	1.00381	1.01041	1.0248	0.97103	0.02105
19.4667	0.977562	1.01148	0.964513	0.929626	0.860061	0.996752	1.01241	1.02774	0.97252	0.01951
19.5	0.996506	1.00928	0.968789	0.824494	0.854529	0.990139	1.01886	1.01187	0.95931	0.02685
19.5333	0.987605	0.912623	0.979367	0.832417	0.843534	1.00055	1.01837	1.02957	0.9505	0.02751
19.5667	0.999431	0.933913	0.950878	0.873911	1.05635	0.997423	1.01583	1.02467	0.98155	0.0207
19.6	0.990531	0.922037	0.926959		1.00471	0.985561	1.00977	1.03191	0.98164	0.0158
19.6333	0.998147	1.00572			1.05379	0.993635	1.0057	1.02705	1.01401	0.00923
19.6667	0.997781	1.00066	0.971499		1.05075	0.989728	1.00472	1.03578	1.00727	0.01027
19.7	0.991113	1.01624	0.966067	0.88775	1.05771	0.987961	1.01184	1.01387	0.99157	0.01759
19.7333	1.00169	0.999993		0.877834	0.884305	0.97764	0.998446		0.95665	0.02418
19.7667	0.994252	0.967131	0.961362	0.806784	1.0573	0.995206	1.00516	1.03965	0.97836	0.02709
19.8	0.987685	0.958334		0.965563	1.04946	0.977199	1.00647	1.02944	0.99631	0.01277
19.8333	1.00504	0.984575	0.966124	0.96289	1.04242	0.984133	0.993952	1.03187	0.99637	0.01016
19.8667	0.991578	0.998409	0.956726		0.959074	0.982608	1.00065	1.02444	0.98764	0.00907
19.9	0.997629	1.00286	0.970664	0.898978	1.05021	0.981486	0.995165	1.02501	0.99025	0.01572
19.9333	0.992905	0.998426	0.964865	0.869655	1.05473	0.987714	0.998551	1.02586	0.98659	0.01921
19.9667	0.982725	0.999598	0.958944	0.837033	1.06393	0.98027	1.00166	1.01589	0.98001	0.02317
20	0.983218	1.003	0.973699		0.91851	0.998635	1.00794	1.02175	0.98668	0.01283

## Sheet: ED Figure 4B
Time(s)	1	2	3	4	5	6	7	8	9	10	Mean	SEM
0.033333	0.979584	0.999722	0.991595		0.994206			1.01857	1.00858	1.01212	1.00063	0.00508027
0.066667	0.995402	1.00642	0.997183		0.990449			0.99868	1.00532	1.01176	1.00075	0.00278583
0.1	0.997662	1.00824	1.01245		0.990279			0.99722	1.00236	1.00429	1.00179	0.00281259
0.133333	0.983748	1.01112	0.993596		1.00121			1.0029	1.01512	1.00811	1.00226	0.00407486
0.166667	0.985436	1.01059	0.987226		0.987836			0.998303	1.01383	1.00167	0.997842	0.00436404
0.2	0.991613	1.0031	1.02578		0.992606			0.991871	1.00759	0.9982	1.00154	0.00465407
0.233333		1.00965	1.02435		0.992178			1.01236	0.991379	1.00413	1.00567	0.00515749
0.266667	0.982561	1.00689	1.02718		0.994391			1.01207	0.993474	0.994153	1.00153	0.00562352
0.3	0.989773	1.01035	1.02123		0.985158			1.00099	1.00057	0.998773	1.00098	0.00457445
0.333333	0.985939	1.00437	1.01293	1.01518	0.98587			0.991028	1.00978	0.984611	0.998714	0.00465595
0.366667	0.990436	0.958293	1.00855	1.01935	0.982174			1.00617	1.00523	1.00298	0.996648	0.00678853
0.4	0.990167	1.00385	1.02393	1.01507	0.999181			0.993164	0.995113	0.993586	1.00176	0.00422417
0.433333	1.00083	1.00457	1.00177	1.01115	0.996561	1.00528		0.995372	1.00169	1.0002	1.00194	0.00157767
0.466667	0.991314		1.02626	1.01816	0.992387	1.0056		0.989744	0.997784	1.01558	1.0046	0.00494139
0.5	0.994825	0.956853	1.00375	1.00944	0.994074	1.00925		0.983307	0.994533	1.01156	0.995288	0.00571891
0.533333	0.992871	1.00809		0.990016	0.995178	1.00182		0.992074	0.989197	1.00303	0.996535	0.00244654
0.566667	0.989205	1.00848		1.00827	0.999343	1.00274		0.983144	1.00563	1.00296	0.999971	0.00324391
0.6	0.997649	0.998161	0.995206	1.00826	0.990636	0.998244		0.99204	0.998773	1.01619	0.999461	0.00267481
0.633333	1.00384	1.00476	0.999443	1.01087	0.99284	0.9891		1.00255	0.992308	1.00049	0.999578	0.00232793
0.666667	1.00219	1.01535	0.994458	1.01754	0.999206	1.00876		0.99562	0.999322	1.00823	1.00452	0.00278782
0.7	0.999462	1.01116		0.997014	1.00084	1.00406		0.98601	0.989421	0.99859	0.99832	0.00279684
0.733333	0.993058	1.00353	1.00752	0.994828	0.988725	1.00168		0.999955	0.975337	1.00557	0.996689	0.00336333
0.766667	0.994855	1.0029	1.00285	0.988319	0.998819	0.996374		0.989507	0.975472	0.993157	0.993584	0.00284313
0.8	0.993951	1.00822	1.00499	0.98951	0.997645	1.0006		0.990016	0.987389	1.00211	0.997158	0.00245902
0.833333	0.995442	1.00504	0.998471	1.00297	1.01113	0.995904		1.00282	0.987526	1.00222	1.00017	0.00225538
0.866667		0.997711	1.00717	1.00417	1.00387	0.996508		1.00015	0.999017	1.00167	1.00128	0.00128096
0.9	0.990954	0.992483	1.0306	1.01327	1.00008	0.997143		0.99611	0.994271	1.00037	1.0017	0.00421787
0.933333	1.00124	0.994299	1.02291	0.999178	1.01408	0.999825		1.00636	0.994856	0.994232	1.003	0.00328481
0.966667	1.0019	1.00014		0.999861	1.01567	0.996754		1.00784	0.991991	1.01158	1.00322	0.0027917
1	0.999632	1.00304		0.993072	1.00036	1.00251	0.995844	1.01412	0.994523	0.995944	0.999893	0.00213036
1.03333	1.00416		1.01382	1.00318	1.00426	0.968708		1.02267	0.999123	0.999364	1.00191	0.00551233
1.06667			0.977763	0.996848	1.01111			1.00477	1.00706	1.00636	1.00065	0.00496075
1.1	1.00645	1.00409	0.985822	0.991023	1.0155		0.992297	0.999766	1.00285	1.00332	1.00012	0.00302433
1.13333	1.00799	0.99148	0.974186	0.995932	1.01636	0.973057		1.00362	1.01368	1.00053	0.997426	0.00520928
1.16667				0.985263	1.01495	0.975081		1.00396	1.00459	0.992292	0.996023	0.00595233
1.2	0.997473	1.00511	0.997043	0.984832	1.00631	1.00382		1.00118	1.01457	0.994858	1.00058	0.00279628
1.23333	1.00765	0.995415		0.977514	1.01865			1.00233	1.00978	0.994751	1.00087	0.00501493
1.26667	1.00314	1.00258	1.00402	0.989798	1.00525			1.01644	0.997309	0.991012	1.00119	0.00302135
1.3	0.998533	1.01282		0.980288	1.02064			1.00343	1.00068	0.992853	1.00132	0.00495715
1.33333	1.0099		0.988412					1.00144	1.00436	0.979964	0.996816	0.00549615
1.36667	1.00708						0.990626	1.00498	1.00818	0.994649	1.0011	0.00355089
1.4	1.01593		1.01156			1.00808		1.0071	1.00032	0.989245	1.00537	0.00385456
1.43333	0.998488	1.0026	0.979315			1.00732		1.00627	1.00542	0.998557	0.999709	0.00365358
1.46667	1.013	1.00418	0.961189			1.01415		1.00178	1.00566	1.00173	1.00024	0.00678027
1.5	1.0095					0.976456		0.998406	1.01078	1.00006	0.999039	0.00615896
1.53333	1.00421		0.97945	0.997743		1.01579		1.02	0.997424	0.998947	1.00194	0.00506131
1.56667	1.01696		0.952259	0.986126		1.00312		0.991704	0.995494	1.00332	0.992712	0.00771128
1.6	1.01615		0.961217	0.999775		1.00308		0.991478	0.999609	1.00973	0.997291	0.00670884
1.63333	1.01138	1.00315	0.993364	0.998582		0.971098		0.99184	1.01039	0.997903	0.997213	0.00450708
1.66667				1.01184		1.00445		0.99889	0.993828	0.997341	1.00127	0.00314938
1.7	1.00618	0.997095	0.985244	1.0025		0.998709		0.996994	0.995842	0.996699	0.997409	0.00213753
1.73333	1.01433	0.967749	1.01203	0.992992		1.0038	1.00281	0.991832	1.00268	0.99594	0.99824	0.00460089
1.76667	1.00565		0.986807			1.00596		0.99839	1.0118	1.00098	1.0016	0.00350674
1.8	1.01245	1.00218	1.01824			1.0131	1.01122	0.996641	0.995465	1.00132	1.00633	0.00299842
1.83333	1.00874		0.975172			1.01132	1.00207	1.00083	0.998007	0.998825	0.999281	0.00443932
1.86667	1.01436		1.02163			1.00074	1.00513	0.998254	1.01083	1.00412	1.00786	0.00310559
1.9	0.998494		1.02089			1.0091		1.00092	0.999316	0.989143	1.00298	0.00442512
1.93333	0.996262	0.958727	1.01651	0.998214		1.01429		0.993133	0.994011	0.995278	0.995803	0.00621299
1.96667			0.982108	0.997963		1.00308		1.00361	0.990674	0.998918	0.996058	0.00337478
2		1.00545	0.980558	1.00408		1.00357		0.997274	1.00287	0.993941	0.998249	0.00333807
2.03333	1.00817	0.962131		0.997643		1.00359		1.00388	1.00378	0.994233	0.996202	0.00593776
2.06667	1.01109		1.01086	1.01137		1.00541		0.998439	0.992925	0.980511	1.00151	0.0044065
2.1	0.99938		1.00679	1.01125		1.00593		1.0044	1.01391	0.989775	1.00449	0.00302495
2.13333	1.00833			1.02171		1.00205	1.00823	1.00458	1.00073	0.989581	1.00503	0.00366926
2.16667	1.01191	1.00981	0.974919	1.00959		1.00855	0.99224	1.02079	0.99538	0.998398	1.0024	0.00455975
2.2	1.00184		0.970564	1.00379		1.00753		1.00782	1.00563	0.985259	0.99749	0.00536051
2.23333	1.00722	1.00193		1.00211		1.01514		0.992379	1.00818	0.995344	1.00319	0.00294829
2.26667	1.00115	1.00835	0.967823	0.999153		0.99352	1.00122	0.97456	0.996872	0.989919	0.992508	0.00441583
2.3	1.00563		1.00125	1.00531		1.00427	1.00994	0.999561	0.992424	0.999138	1.00219	0.0018825
2.33333	1.00854	1.01017	0.969296	1.01632		1.00409		0.992648	1.00449	1.00642	1.0015	0.00517472
2.36667	1.00241		0.983649	1.01516		1.00644		0.999809	0.994451	0.991117	0.999004	0.00392532
2.4	1.00118			1.01488		1.00315		0.991345	0.990278	0.983424	0.997377	0.00460348
2.43333	1.00783		1.00422	1.02547		0.998849		0.990282	0.985621	1.00277	1.00215	0.00489405
2.46667	1.01745		0.975163	1.01214		1.01069	1.01229	0.999759	0.989581	0.971829	0.998613	0.00629754
2.5	1.01091	1.01301		0.998278		1.00218		0.984319	0.984333	0.985699	0.996961	0.00469842
2.53333	1.01376			1.02107		1.00657		1.00038	0.993519	0.982921	1.00304	0.00564225
2.56667	1.01096		0.983539	1.00352		1.01245	1.01155	0.993133	0.995331	0.989675	1.00002	0.00393579
2.6	1.01447	1.01615	1.0175	1.01643		1.00771		0.987281	0.985094	0.987694	1.00404	0.00519367
2.63333	1.00597			1.01833		1.00491	1.00215	0.996867	0.99216	0.985184	1.0008	0.0040433
2.66667	1.01527	1.01642	1.00395	1.01464		1.00674		1.00351	0.989096	0.983799	1.00418	0.00429326
2.7	1.01581	1.0129	1.01802	1.02293		1.01245		0.994688	1.00063	0.995629	1.00913	0.00378495
2.73333	1.00609	0.965603	0.995572	1.01562			1.01206	0.981166	0.986738	0.995562	0.994801	0.00592102
2.76667	1.00508		0.986357	1.01559			1.01331	0.995335	0.994402	1.00783	1.00256	0.0040851
2.8	1.01472		1.01626	1.02729			1.01216	0.996064	0.978708	0.990666	1.00512	0.00644721
2.83333				1.0155				1.00945	0.992234	0.99473	1.00298	0.0056434
2.86667	1.0132		1.00355	1.02346				1.00051	1.00011	0.989933	1.00513	0.00476441
2.9	1.01038		0.970166	1.02627				0.998071	0.99539	0.992704	0.998831	0.00765492
2.93333	1.01258		0.968662	1.01406			1.00834	1.00224	0.998017	0.988908	0.998974	0.00604022
2.96667	1.00307	0.96211	0.971692	1.01306				1.02771	0.989013	0.98289	0.992793	0.00877596
3	1.00955	1.01113	0.976803	1.01337			1.0037	1.00758	1.00983	0.992468	1.00305	0.00439517
3.03333	1.01912		0.967974	1.02355				1.01421	1.01376	1.00236	1.00683	0.00829243
3.06667	1.00788	0.996062	0.973033	1.01619				1.04095	1.01183	0.993739	1.00567	0.00801463
3.1	1.00847		0.995195	1.01782				1.03593	1.01698	0.98841	1.01047	0.00699588
3.13333		1.00758		1.02127				1.04061	1.00332	0.995681	1.01369	0.00790902
3.16667	1.01478	0.963425	0.973008	1.02011				1.00625	1.00704	0.992857	0.996781	0.00810086
3.2	1.00314		0.955417	1.02545				0.991706	1.00736	0.988117	0.9952	0.00961141
3.23333	1.02031	1.00079	0.968519	1.02472				0.997755	1.00903	0.989108	1.00146	0.00724642
3.26667	1.00946			1.02227				1.01815	1.00708	0.984422	1.00828	0.00657742
3.3	1.0127	1.00837	0.965461	1.02511				0.999776	1.01336	0.984917	1.00138	0.00763354
3.33333	1.0179		0.976936	1.02698				0.988996	1.00251	0.98893	1.00038	0.00780883
3.36667	1.01463			1.02917				1.01709	1.01224	0.976453	1.00992	0.00885858
3.4	1.01215		0.973575	1.03189				0.995911	1.00779	0.983204	1.00075	0.00860083
3.43333	1.02437	1.00692	0.9792	1.02667	1.02035			1.01487	1.00554	0.983414	1.00767	0.00634753
3.46667	1.00625	1.00659	0.971241	1.02617	1.00937			0.987866	1.0097	0.985183	1.0003	0.00618529
3.5	1.02517			1.02837	1.02245			1.03516	1.01122	0.992469	1.01914	0.00622727
3.53333	1.01245			1.02436	1.02167			1.00965	1.01359	0.989958	1.01195	0.00496803
3.56667	1.01728		0.95944	1.03657				1.01988	1.01518	0.989321	1.00628	0.0112313
3.6	1.00958		0.959466	1.02179				1.02675	1.01121	0.984121	1.00215	0.0104485
3.63333	1.01804		0.971135	1.01336				0.985933	1.00817	0.97956	0.996033	0.00801051
3.66667	1.00611		0.97012	1.02519	1.0171			1.01094	1.00972	0.975049	1.00203	0.00796538
3.7			0.972897	1.02977	0.969913			1.02357	1.00698	0.986335	0.998244	0.0104859
3.73333	1.00895		0.963906	1.02472	1.00264			0.995053	1.00423	0.990197	0.998527	0.00711187
3.76667	1.01714	0.961524	0.967634	1.03312	1.01405			0.985233	1.00704	1.00761	0.999168	0.00890024
3.8			0.957784	1.02843		1.00868		0.995591	1.00943	0.978418	0.996389	0.0102662
3.83333	1.00777			1.02059	1.02005	1.01587		1.01295	1.00325	0.989109	1.00994	0.00420688
3.86667	1.01135		0.956808	1.02868	1.02099	1.01299		0.9766	1.00102	0.996311	1.00059	0.00843646
3.9	1.00783			1.01978		1.01177		1.0045	1.01418	1.00055	1.00977	0.00282914
3.93333	1.00137		0.969944	1.01663	1.02301	1.01812		0.96756	1.01193	0.994589	1.0004	0.00763302
3.96667	1.01895	1.01894	0.96958	1.03405	1.01412	1.0168	1.00798	0.973591	1.01248	0.991578	1.00581	0.00661225
4	1.01555		0.977825	1.03277	1.02272	1.00707	1.01289	1.00301	0.996282	0.992152	1.0067	0.00555396
4.03333	1.00893	1.00956	0.960482	1.02074		1.00348		0.996213	0.994738	0.994197	0.998542	0.00631565
4.06667	1.01578		0.975209	1.02009		1.0071		0.988966	0.997238	0.992904	0.999613	0.00596896
4.1	1.00699	1.01582	0.982544	1.02262	0.997168	1.00471		0.989781	1.00017	0.98883	1.00096	0.00435684
4.13333	1.01069	1.00722	0.983895	1.03563		1.01117	1.01468	0.995358	0.997141	0.994651	1.00561	0.00501611
4.16667	1.00683			1.02708		1.00592		0.990471	1.00585	0.998017	1.0057	0.00499819
4.2	1.01692	1.0073		1.04248		1.00782	1.01423	0.995059	1.00015	0.986856	1.00885	0.00594289
4.23333	1.01306			1.03159		1.01056		0.967955	0.998788	0.996589	1.00309	0.00868448
4.26667	1.01877	1.00997	0.970862	1.03636		1.00816	1.01383	1.00003	0.997907	0.994396	1.00559	0.00605057
4.3		1.00271	0.950855	1.03854		1.00414		0.996119	1.0059	0.989301	0.998223	0.00984058
4.33333	1.013		0.964323	1.04421	1.01779	1.00475	1.01422	0.96615	0.996696	0.996035	1.00191	0.00839744
4.36667	1.02313		0.965006	1.03872		1.0015		0.972988	0.999681	0.998709	0.999961	0.00974911
4.4			0.98272	1.03767		1.01093		0.989025	0.998142	0.983907	1.0004	0.00860002
4.43333	1.01711			1.00578	1.02386	0.999965	1.00788	0.996622	1.00419	0.981369	1.0046	0.00456018
4.46667	1.02202	1.00514		1.00429		1.00348	1.00237	0.974759	0.996756	0.981441	0.998781	0.00522296
4.5	1.01481		0.975949	0.983972	1.02305	1.00061	1.01403	0.965543	0.996964	0.986837	0.995751	0.00644456
4.53333	1.02164		0.978595	0.991147		1.00813	1.00927	0.993202	0.98651	0.987764	0.997032	0.00511379
4.56667	1.01389		0.949211	0.969147		1.00297	0.999692	1.00148	0.994873	0.989304	0.99007	0.00742479
4.6	1.00173	1.00342	0.980189	0.97634	1.00342	1.00456	1.00405	0.975478	1.00057	0.996854	0.99466	0.00386182
4.63333	1.00231	1.00394		0.970786		1.00276		1.00233	1.00751	0.996598	0.998034	0.00470119
4.66667			0.988734	0.97791		1.01761		0.996887	0.994531	0.991757	0.994571	0.00534035
4.7	1.01162	0.966745	0.983638	0.971011		1.02041		0.99133	1.00518	0.984809	0.991843	0.00676889
4.73333			0.984886	0.966848		1.00148	1.01351	0.984201	1.00204	0.989696	0.991809	0.00577834
4.76667	1.0029			0.973081		1.0188	1.00636	0.99689	1.01244	0.991077	1.00022	0.00571249
4.8	1.01103		0.975399	0.983599	1.02046	1.00483	1.00707	1.0012	1.00159	0.994719	0.999988	0.00459417
4.83333	1.01155		0.985394	0.986406		1.01634	1.00991	0.98603	1.00236	0.993485	0.998934	0.0044935
4.86667	1.00806			0.995225		1.00739		0.968608	1.00769	0.992693	0.99661	0.0062485
4.9	1.00643	0.964665	0.972953	0.995466		1.00062		0.987801	1.00455	1.00523	0.992213	0.00559673
4.93333	1.01344	1.00408	0.964504	0.98453		1.00405	1.00416	0.969353	1.0047	1.00071	0.994393	0.00578474
4.96667	1.00161			0.992204	1.0042	0.997934	1.00867	0.967143	1.01666	1.00395	0.999046	0.00521974
5			0.893993	0.983864	1.00945	1.0045	1.00122	1.00422	1.00667	1.00428	0.988525	0.0137815
5.03333	1.02023	0.970695	0.971279	0.98325		1.00765	1.01378	1.01524	1.00917	1.01329	1.00051	0.00657516
5.06667	1.02603		0.959207	0.991231	1.03502	1.01058	1.02062	1.02237	1.01029	1.00745	1.0092	0.00752982
5.1	1.02185	1.00553	0.965645	0.999022	1.02609	1.01176	1.01259	1.00811	1.00628	0.991726	1.00486	0.00537904
5.13333	1.02797		0.961926	0.994932	1.03755	1.0064	1.0121	1.02885	1.007	1.00283	1.00884	0.00749174
5.16667		0.922374		1.0054	1.03154	1.02053	1.01539	1.01604	1.0094	0.997307	1.00225	0.0119675
5.2	1.03016		0.883931	1.00033		1.01451	1.01032	0.988263	1.00649	0.997647	0.991455	0.0159798
5.23333	1.01904		0.901412	1.00016	1.03095	1.01105	1.01794	1.00404	1.00797	1.01024	1.00031	0.01273
5.26667	1.02614	0.984733	0.972815	1.01889	1.04329	1.01938	1.00866	1.01506	1.00873	1.00794	1.01056	0.00631327
5.3	1.02889			1.01577	1.02656	1.01399	1.0179	1.01462	1.01096	1.00391	1.01657	0.00285414
5.33333	1.02824		0.891994	1.01055	1.03679	1.01575	1.02093	1.01325	1.00305	1.00086	1.00238	0.0143121
5.36667	1.02399	0.95668	0.968759	1.019		1.01328	1.0202	1.01699	1.01279	1.00034	1.00356	0.00808938
5.4	1.01974	1.00751		1.01675	1.02854	1.02026	1.01591	0.976877	1.00414	1.00832	1.01089	0.00494056
5.43333	1.02507	1.00949	0.954063	1.02052		1.02546	1.00536	1.02193	0.995828	1.0036	1.00681	0.00747232
5.46667	1.03074	1.00045	0.972809	1.01689	1.02685	1.01788	1.01654	1.00523	1.00446	0.999546	1.00914	0.00526601
5.5	1.02234	1.00222	0.96637	1.0094	1.03324	1.02262	1.01962	1.01248	0.997389	1.00112	1.00868	0.00590201
5.53333	1.01754		0.962395	1.0208	1.02709	1.02241	1.01314	0.986367	1.00393	0.994848	1.00539	0.00700171
5.56667	1.02754		0.986747	1.01443	1.04208	1.01578	1.01108	0.997439	1.01346	0.996224	1.01164	0.00561126
5.6		0.969678	1.00094	1.0224	1.00545	1.01926	1.00951	1.01726	1.0111	0.999337	1.0061	0.00526954
5.63333	1.02516		1.00357	1.02125	1.05111	1.01837	1.0144	1.01637	0.997401	0.994297	1.01577	0.00568038
5.66667	1.03699		1.00116	1.0234	1.00428	1.0235	1.019	1.01566	0.995477	1.00312	1.01362	0.00449461
5.7	1.0326			1.02359		1.01838	1.01286	1.01086	1.00604	0.991862	1.01374	0.00493126
5.73333	1.0195	1.00444	0.960757	1.02049	1.00319	1.02145	1.01251	1.01692	1.00271	1.00735	1.00693	0.00563076
5.76667	1.02928	1.00566	0.998413	1.02519	1.03532	1.01426	1.01144	1.01022	0.995832	1.00968	1.01353	0.00407304
5.8	1.02337		0.94886	1.02268	1.03531	1.0208	1.00704	0.987119	1.00016	0.997518	1.00476	0.00863868
5.83333		1.00423	0.99004	1.02765	1.0242	1.02258	1.01273	1.01811	0.985156	1.00065	1.00948	0.00510811
5.86667	1.02202		0.996417	1.01732	1.01357	1.01655	1.0077	1.01549	0.9888	0.994214	1.00801	0.00397328
5.9	1.02155			1.02158	1.02926	1.02369	1.00392	1.01141	0.989532	0.998586	1.01244	0.00493936
5.93333	1.01409	0.988821	0.992415	1.02813	1.0267	1.02057	1.01032	0.997706	0.981715	0.997622	1.00581	0.00518797
5.96667	1.0253			1.02752	1.02738	1.01714	1.01346	0.981854	0.98038	0.999828	1.00911	0.0069086
6	1.02558		0.992913	1.03274	1.00702	1.01922	1.02061	1.00277	0.975575	1.00104	1.00861	0.00596095
6.03333	1.011	0.955318	0.989956	1.01311		1.01494	1.00557	1.00249	0.980127	1.00092	0.99705	0.00642087
6.06667	1.01737		0.991706	1.01801		1.01946	1.00826	0.998887	0.973531	1.00231	1.00369	0.00557419
6.1	1.00724		0.951687	1.01785	1.02246	1.0175	1.01104	1.01427	0.978387	0.999245	1.00219	0.0076974
6.13333	1.02383	0.998556	0.998683	1.01667	0.999347	1.00825	1.01199	0.991078	0.985693	0.992395	1.00265	0.0038496
6.16667	1.01995			1.02097	1.00352	1.00023	1.01319	1.00062	0.985977	0.985056	1.00369	0.00488313
6.2	1.01022	0.994349		1.02095		1.01728	1.02529	0.991391	0.97348	0.994001	1.00337	0.0063184
6.23333			0.996928	1.02459	0.995882	1.00907	1.01062	0.963183	0.975996	0.981042	0.994664	0.00718332
6.26667	1.00211			1.02602	1.01925	1.0091	1.01811	0.995536	0.981294	0.994765	1.00577	0.00533367
6.3				1.02164	1.01703	1.00245	1.01818	0.979539	0.989627	0.987047	1.00222	0.00646321
6.33333	1.00897		0.984776	1.02931	1.00846	1.0163	1.03082	0.972361	0.983377	0.98537	1.00219	0.00713856
6.36667			0.989288	1.02224	0.993735	1.00236	1.01556	0.999851	0.989705	0.977558	0.998788	0.00516584
6.4	0.99967		0.980576	1.01461	1.00706	1.00609	1.00312	0.993411	0.982875	0.981995	0.996601	0.00415755
6.43333	1.00718		0.981206	1.02902	1.00162	1.00606	1.01741	0.990536	0.98888	0.978313	1.00003	0.00561869
6.46667	1.00509	0.989175	0.975396	1.01713		1.00517	1.02237	1.00152	0.973699	0.983666	0.997022	0.00583325
6.5	0.995769		0.972351	1.02218	0.998902	1.00145	1.02757	0.98661	0.985108	0.978404	0.996483	0.00622936
6.53333	1.00786		0.969528	1.02436		0.998764	1.00865	0.962911	0.962802	0.985626	0.990063	0.00827664
6.56667	1.00194			1.02007	0.995474	1.00167	1.00785	0.98414	0.964155	0.968261	0.992944	0.00686186
6.6	1.00385		0.966296	1.02573		1.00403	1.02024	0.992452	0.966308	0.969544	0.993557	0.0084795
6.63333	1.00246		0.96912	1.01616		0.997509	1.00595	0.957238	0.963056	0.972212	0.985464	0.00794796
6.66667	1.00002			1.01935	0.969728	0.999731	1.01146	0.952038	0.969209	0.969905	0.98643	0.00855992
6.7	0.993776			1.00016		0.999226	0.916934	0.958345	0.95271	0.961883	0.969005	0.0115872
6.73333	0.995776			1.00946		1.00482	1.01465	0.967006	0.96301	0.962144	0.988124	0.00879393
6.76667		0.981058		1.02056	0.98254	1.00314	1.02468	0.991901	0.960529	0.954316	0.989841	0.00905374
6.8	0.991368		0.966273	1.02672	0.992792	0.992627	1.01784	0.951418	0.951722	0.952509	0.982586	0.00955094
6.83333	1.00632	0.987859		1.01419		0.996419	1.02503	0.962909	0.950403	0.958769	0.987738	0.00978419
6.86667	0.988763			1.02301	0.982151	0.989883	1.01034	0.980534	0.9508	0.956871	0.985295	0.0085706
6.9	1.00059			1.02861	0.965711	0.995338	1.03046	0.961643	0.940161	0.945688	0.983525	0.0125173
6.93333	0.854139		0.953222	1.02819	0.974592	0.996531	1.01351	0.956025	0.939113	0.951327	0.96296	0.0169806
6.96667	0.989695		0.964594	1.01416	0.964578	0.992884	1.0143	0.98319	0.948418	0.942832	0.979405	0.0087117
7	0.996217	0.984926		1.01421		0.987701	1.02241	0.963911	0.947492	0.949316	0.983274	0.00989905
7.03333	0.996397			1.02304	0.956443	0.988186	1.00988	0.98023	0.949324	0.947501	0.981375	0.010016
7.06667	1.00274			1.00993	0.96557	0.988448	1.01506	0.950421	0.939539	0.942418	0.976766	0.0109891
7.1	0.988643			1.01017		0.987145	0.996055	0.944825	0.952337	0.951443	0.975803	0.00974499
7.13333	0.986398			1.01971	0.96466	0.989135	1.01094	0.963859	0.924817	0.944492	0.975502	0.0114167
7.16667	0.996686	0.979057		1.0188	0.980353	0.992125	1.01226	0.981304	0.939545	0.940941	0.982341	0.00919456
7.2	1.00351			1.01543		0.977145	1.02109	0.949354	0.940341	0.946289	0.979024	0.0130448
7.23333	0.998708			1.01844	0.953783	0.985985	1.0167	0.945194	0.943505	0.939917	0.975279	0.011854
7.26667	0.980096			1.01785		0.989271	1.00565	0.948969	0.935736	0.936318	0.973413	0.0126332
7.3	0.991725			1.01616	0.956252	0.985917	0.996013	0.960345	0.946669	0.947086	0.975021	0.00914431
7.33333	0.903395			1.02425		0.987546	1.01763	0.961137	0.938498	0.945022	0.968211	0.0166389
7.36667	0.994496			1.02629	0.963311	0.981406	1.00113	0.948993	0.939284	0.946923	0.975229	0.0108654
7.4	0.984848			1.01812	0.949497	0.985738	1.01559	0.965332	0.930915	0.932138	0.972772	0.0121036
7.43333	0.99466			1.01705		0.984167	0.99708	0.956996	0.935898	0.937071	0.974704	0.0119699
7.46667	0.981168			1.01432	0.964541	0.984122	0.912331	0.955926	0.941187	0.931367	0.960621	0.0115428
7.5	0.991936			1.02286	0.972941	0.987109	1.02088	0.952846	0.938882	0.932909	0.977546	0.0122099
7.53333	0.979541	0.989304		1.02199	0.962226	0.980993	1.0123	0.949298	0.939587	0.924363	0.973289	0.0108501
7.56667	0.993376			1.01981	0.970697	0.976939	1.00026	0.978686	0.924249	0.939669	0.97546	0.011053
7.6	0.983901			1.01374	0.984407	0.989898	0.998189	0.941086	0.946667	0.936461	0.974293	0.0102313
7.63333	0.990432			1.02562	0.948279	0.984063	0.993769	0.95391	0.943746	0.933829	0.971706	0.0111637
7.66667	0.984805	0.987259		1.01372	0.965164	0.981198	1.00399	0.957858	0.920003	0.924551	0.970949	0.0108249
7.7	0.979139			1.01997		0.983261	1.01585	0.97112	0.944853	0.931414	0.977945	0.0124784
7.73333	0.97997			1.0217	0.959932	0.982243	0.999598	0.96134	0.948016	0.93485	0.973456	0.0099983
7.76667				1.01572	0.956472	0.982129	1.01205	0.955155	0.935116	0.932918	0.969936	0.0129104
7.8	0.848169			1.01054	0.966352	0.992523	1.01969	0.96399	0.951274	0.937851	0.961298	0.0190346
7.83333	0.975793			1.02305		0.985796	1.01301	0.936194	0.952766	0.932371	0.974141	0.0135259
7.86667	0.853856			1.01683	0.980523	0.982079	1.01709	0.950459	0.949324	0.939689	0.961231	0.0185499
7.9	0.984994			1.00542	0.966892	0.98177	1.02128	0.950755	0.95407	0.934128	0.974914	0.0103298
7.93333	0.985909			1.00911	0.978556	0.980725	1.01595	0.952744	0.955834	0.941339	0.977521	0.00940131
7.96667	0.989888			1.01766	0.988484	0.979657	1.00826	0.958108	0.957408	0.934834	0.979287	0.00983097
8				1.01639	0.951172	0.983761	1.01382	0.946122	0.954581	0.936219	0.971723	0.0124823
8.03333				1.01046	0.987836	0.982699	1.01071	0.964829	0.958461	0.934065	0.978438	0.0106086
8.06667	0.966086			1.00659	0.972384	0.980253	0.997217	0.974554	0.961009	0.935315	0.974176	0.00775832
8.1				1.01472		0.984116	1.018	0.984567	0.961308	0.934485	0.982866	0.012986
8.13333				1.01625	0.987772	0.978708	1.00655	0.984573	0.935996	0.931771	0.977375	0.0122633
8.16667		0.987837		1.00353	0.965655	0.983917	1.00257	0.947213	0.963179	0.93864	0.974068	0.00859067
8.2				1.00946	0.985177	0.986365	1.01272	0.991232	0.952681	0.936667	0.982043	0.0106084
8.23333	0.984835			1.00784	0.973216	0.974312	1.01487	0.974801	0.960329	0.940404	0.978827	0.00851901
8.26667	0.976481			1.01284	0.994869	0.976577	1.02684	0.946943	0.955545	0.938595	0.978587	0.0111059
8.3	0.989147			1.01046	0.963959	0.98198	0.997	0.950248	0.959598	0.940797	0.974149	0.00858395
8.33333	0.98667	0.995402		1.01924	0.997305	0.981071	1.01304	0.982835	0.965214	0.934232	0.986112	0.00849729
8.36667				1.01225	0.978876	0.980696	0.981236	0.96166	0.955913	0.932672	0.9719	0.00943701
8.4				1.00355	0.989604	0.981175	1.02338	0.966748	0.960756	0.951638	0.982407	0.00956131
8.43333	0.976936			1.00833	0.996387	0.982593	0.993068	0.950181	0.961099	0.937397	0.975749	0.00863441
8.46667	0.982061			1.00276	1.00596	0.980095	0.999483	0.96351	0.952243	0.933994	0.977514	0.00914701
8.5				1.00646	0.972644	0.969319	0.99856	0.964142	0.962026	0.926806	0.971423	0.00988274
8.53333				1.00026	0.997775	0.979118	0.98858	0.949204	0.95978	0.937112	0.973119	0.00934277
8.56667	0.979256			1.0006	0.999634	0.971821	0.999381	0.988061	0.962445	0.939589	0.980099	0.00762886
8.6	0.973003			0.996912	0.989518	0.981753	1.00673	0.958644	0.963636	0.938358	0.976069	0.00788015
8.63333	0.981556			1.00315	1.01372	0.979187	0.996735	0.956948	0.962455	0.942692	0.979556	0.00864539
8.66667				1.00112	1.00829	0.981664	1.02474	0.98296	0.962344	0.948758	0.987126	0.00999047
8.7	0.97687			0.996622	1.01096	0.98068	0.998042	0.97727	0.952649	0.947558	0.980081	0.00776713
8.73333	0.989856	0.997178		1.00421	1.01624	0.987867	0.989565	0.988145	0.957643	0.948	0.986523	0.00712253
8.76667	0.971431	0.998814		0.994432	1.00136	0.988559	1.02681	0.98487	0.960563	0.946693	0.985947	0.00794828
8.8				1.0059	0.989516	0.981998	0.93638	0.976561	0.956268	0.961444	0.972582	0.00873192
8.83333		0.993484		0.991605	0.995159	0.988894	1.01679	0.987633	0.952874	0.950901	0.984667	0.00784364
8.86667	0.981995			1.00315	1.00678	0.988387	1.02459	0.979319	0.970073	0.953524	0.988476	0.00795151
8.9	0.979128	0.995424		0.996282	1.01127	0.990873	1.00443	0.962605	0.972205	0.95469	0.985212	0.00640775
8.93333				1.00458		0.987589	1.02449	0.961175	0.96483	0.96114	0.983966	0.0107803
8.96667	0.981088			0.993815	1.01765	0.98689	1.00599	0.961862	0.971834	0.962079	0.98515	0.00711745
9				1.00078	1.00948	0.985487	1.01043	0.969105	0.972769	0.958514	0.986654	0.00783813
9.03333				0.994288	1.00532	0.982408	1.02446	0.964923	0.972431	0.956104	0.985705	0.00907074
9.06667	0.973838			0.993896	1.00769	0.986885	0.998801	0.994839	0.970662	0.944335	0.983868	0.00714412
9.1	0.984452			0.997821	1.01682	0.982151	1.00139	0.969458	0.974222	0.953161	0.984935	0.00710321
9.13333				0.994405	1.02385	0.987149	1.01554	0.963286	0.972777	0.961226	0.98832	0.00931513
9.16667				0.994429	1.0227	0.995067	1.01	0.991256	0.965347	0.96261	0.991629	0.00824524
9.2				0.982733	1.01396	0.992855	1.00291	1.0042	0.976257	0.962344	0.990753	0.00681987
9.23333				0.988893	1.01366	0.988709	0.999819	1.00344	0.963199	0.97429	0.990288	0.00655484
9.26667	0.974715			0.989258	0.981747	0.998814	1.00279	0.995199	0.960431	0.968994	0.983994	0.00534114
9.3		0.993269		0.988298		0.998169	0.997367	1.0094	0.969496	0.963133	0.988447	0.00624186
9.33333	0.97321			0.977513	1.02461	0.990581	1.03044	0.985403	0.970709	0.974908	0.990922	0.00833022
9.36667				0.990639		0.996558	1.01727	0.980609	0.967688	0.961037	0.985633	0.00836123
9.4				0.985496	1.02195	0.99421	1.02515	1.00519	0.980579	0.967516	0.997156	0.00810796
9.43333				0.981561		0.993089	1.0173	0.977425	0.950353	0.968952	0.981447	0.0092382
9.46667	0.968544			0.975882	1.02196	0.999891	1.01089	0.985949	0.951263	0.960758	0.984392	0.00879945
9.5				0.987542	1.01421	0.998285	1.00352	0.9843	0.968093	0.962072	0.988289	0.00709705
9.53333				0.985724	1.0258	0.993471	0.995214	0.989572		0.960733	0.991752	0.00851906
9.56667				0.980227	1.02086	0.997259	1.00735	1.01105	0.980177	0.971541	0.995495	0.00702135
9.6	0.971781			0.994982		1.00452	1.01272	0.986243	0.9553	0.971054	0.985229	0.00771767
9.63333	0.91731			0.982378	1.01702	0.996486	1.00545	1.0048	0.949169	0.968762	0.980172	0.0118903
9.66667				0.985226	1.0329	0.98673	1.00313	0.980546	0.970271	0.974052	0.990408	0.00813327
9.7	0.978149	0.993469		0.992642	1.03102	0.993696	1.00412	0.992604	0.974863	0.965268	0.991759	0.00631904
9.73333				0.980378	1.03313	0.996264	1.00956	0.980409	0.977404	0.965949	0.991871	0.00870054
9.76667				0.996058	1.02646	0.996849	1.01758	0.99125	0.950197	0.970404	0.992686	0.00987165
9.8	0.974106	0.993136		0.991938	1.02375	0.99858	1.01252	0.998499	0.977592	0.97542	0.993949	0.00563296
9.83333				0.999776		0.998603	1.01295	1.00128	0.971584	0.976404	0.993434	0.00652412
9.86667				0.99218	0.995677	1.00376	1.01119	1.00726	0.978377	0.970398	0.994119	0.00571865
9.9	0.971974			0.992629	1.02546	1.00741	1.00887	1.02097	0.961122	0.967783	0.994527	0.00883474
9.93333				0.986545	1.01274	0.998893	1.00932	0.99752	0.976874	0.968706	0.992942	0.00617765
9.96667				0.990902	1.03313	1.00107	1.00469	0.996929	0.950884	0.969336	0.99242	0.00995624
10		0.989526		0.986499	1.01821	0.999247	1.01104	1.00162	0.950454	0.980496	0.992136	0.00742708
10.0333				0.991036	1.02901	1.00356	1.01065	1.01072	0.944871	0.975607	0.995064	0.0104955
10.0667	0.96632			0.985949		1.00275	1.00713	0.986165	0.978481	0.974132	0.985847	0.00558827
10.1				0.990628	1.02253	1.00821	1.01327	0.997711	0.98232	0.967648	0.997473	0.00716894
10.1333				0.992174	1.03003	1.00917	1.03075	1.00285		0.969892	1.00581	0.00949486
10.1667		0.992868		1.00032	1.03031	1.00869	1.01976	1.01199	0.950372	0.966712	0.997628	0.00954811
10.2				0.985281	1.03483	1.00126	1.01788	1.01441	0.980245	0.973173	1.00101	0.00853751
10.2333		0.991857		0.98978	1.03419	0.999123	1.01337	1.00045	0.962823	0.971577	0.995397	0.00795114
10.2667	0.960425			0.988738	1.0323	0.999972	1.01248	0.997377	0.971563	0.969364	0.991528	0.0085271
10.3	0.970807	0.98444		0.992298	1.026	1.00553	1.01121	0.985971	0.960221	0.962938	0.988824	0.00746737
10.3333		0.9976		0.986603	1.00628	1.00665	1.01307	0.982853	0.981355	0.971652	0.993258	0.00521221
10.3667		0.997672		0.999438	1.03758	0.998731	1.01656	0.996501	0.950317	0.970184	0.995873	0.00938026
10.4		0.988987		0.995762	1.02555	1.00238	1.01091	1.00154	0.956532	0.975528	0.994649	0.00753392
10.4333		1.00547		1.0029	1.01587	1.01238	1.01685	1.02428	0.979034	0.967218	1.003	0.00701926
10.4667				1.0012	1.02648	1.00432	1.00482	0.990137	0.957854	0.971969	0.993824	0.00864176
10.5	0.957527			1.00638	1.03261	1.00738	1.00774	1.00803	0.972725	0.966659	0.994881	0.00919313
10.5333				1.00234		1.01128	1.00792	0.99133	0.95281	0.967133	0.988802	0.00970444
10.5667				1.00063		1.0119	1.03097	1.01775	0.992993	0.967738	1.00366	0.00899148
10.6				1.00413		1.0127	1.0316	0.993578	0.949164	0.96883	0.993334	0.0122574
10.6333				1.00007		1.01113	1.01632	0.98547		0.964403	0.99548	0.009398
10.6667				1.0023		1.00201	1.01947	0.998337	0.98251	0.963675	0.994717	0.00785125
10.7		0.98035		1.00592	1.03244	1.00933	1.00858	1.00191	0.959387	0.961533	0.994931	0.00902489
10.7333		0.99624		1.00664	1.02909	1.01084	1.0162	1.00718	0.981887	0.968702	1.0021	0.00682494
10.7667		1.00075		1.00891	1.01934	1.0021	1.01842	1.01982	0.97162	0.965195	1.00077	0.00756269
10.8				1.00148	1.02981	1.00395	1.02615	1.01632	0.963681	0.978388	1.00283	0.00924154
10.8333	0.979357			1.00951	1.03088	1.00488	1.01759	0.998375	0.990155	0.950867	0.997701	0.00873667
10.8667				1.00956	1.01814	1.01457	1.02052	1.00109		0.976675	1.00676	0.00664557
10.9				1.01451	1.02828	1.01218	1.00917	1.01171		0.97015	1.00766	0.00799582
10.9333				1.01427	1.02605	1.00927	1.01503	1.03425	0.975448	0.963688	1.00543	0.00985892
10.9667				1.00758	1.02101	1.00634	1.02191	0.995327	0.982338	0.966265	1.00011	0.00770092
11	0.944964			1.00433	1.02405	1.00577	1.00746	1.01328	0.98866	0.964543	0.994132	0.00945068
11.0333				1.00449	1.02964	1.01705	1.01757	1.02271	0.993855	0.957767	1.00615	0.00921973
11.0667	0.956131			1.01481		1.01425	1.02855	1.01785		0.965102	0.999448	0.0125119
11.1				1.01637		1.0125	1.02312	1.0036	1.00324	0.964748	1.00393	0.00843087
11.1333	0.929308			1.01542	1.03486	1.00296	1.02567	1.01251	0.966256	0.961077	0.993506	0.0130867
11.1667	0.956421			1.01184	1.00922	1.00688	1.02825	1.03694	0.994759	0.965412	1.00121	0.0099516
11.2	0.967511			1.0173	1.02738	1.01065	1.0289	1.03858	0.997725	0.971606	1.00746	0.00936186
11.2333		0.986346		1.01995	1.03481	1.00652	1.02021	1.02889	0.991443	0.971847	1.0075	0.00790273
11.2667				1.01446		1.01511	1.02759	0.997861	0.995134	0.982921	1.00551	0.00667401
11.3		0.987582		1.00905		1.0191	1.02462	1.00726	0.991419	0.976463	1.00221	0.00664206
11.3333				1.0107	1.03428	1.0142	1.03161	0.984731	0.995542	0.969619	1.00581	0.00903648
11.3667	0.953253	1.00865		1.01108	1.02806	1.01117	1.01701	0.997548	1.00035	0.96824	0.999485	0.00799015
11.4	0.95903	0.997536		1.00539		1.02721	1.03437	0.994072	0.988753	0.980522	0.99836	0.00861327
11.4333	0.940402			1.01552		1.01687	1.02615	0.986684	0.998146	0.990631	0.996343	0.010841
11.4667				1.01694	1.00158	1.01433	1.01036	1.02652	1.00082	0.981832	1.00748	0.00544229
11.5				1.01312	1.02192	1.0213	1.02842	1.0174	0.996819	0.985074	1.01201	0.00585626
11.5333	0.964191			1.01832	1.01864	1.01696	1.02508	0.986019	1.0059	0.976854	1.00149	0.00805094
11.5667		1.00238		1.01158	1.00909	1.01686	1.0354	1.01188	1.00798	0.977079	1.00903	0.00572844
11.6	0.957878			0.99995	1.00683	1.01376	1.02987	0.976094	1.0116	0.966519	0.995311	0.00901712
11.6333				1.01583	0.996809	1.01378	1.02501	1.01892	1.0139	0.964519	1.00697	0.00778648
11.6667	0.951765			1.01335		1.01174	1.02619	1.00735	1.01024	0.975332	0.999423	0.00987231
11.7				1.01042	1.01589	1.01317	1.03628	0.984768	1.00648	0.967768	1.00497	0.00843848
11.7333				1.01155		1.00142	1.03941	0.970533	1.006	0.962489	0.998567	0.0115294
11.7667		0.988992		1.01842	1.01514	1.01681	1.03823	0.988702	1.00515	0.968044	1.00494	0.00780844
11.8				1.01694		1.01454	1.03238	0.989082	1.00592	0.949234	1.00135	0.0119265
11.8333	0.954316			1.01353	1.00774	1.02003	1.03442	0.98053	0.999383	0.952325	0.995285	0.0106826
11.8667	0.957455			1.01991	1.0231	1.01344	1.0347	0.973349	1.01198	0.96407	0.999751	0.0105806
11.9				1.0159		1.01834	1.03937	0.97979	1.00961	0.949821	1.00214	0.0130769
11.9333				1.01614	1.01012	1.01493	1.03669	1.02975	1.02367	0.952324	1.01195	0.0105234
11.9667				1.01689		1.02097	1.03631	1.01586	1.01015	0.961842	1.01034	0.0103487
12	0.954547			1.01836	1.01242	1.01668	1.03931	0.991349	0.987221	0.959327	0.997402	0.0105383
12.0333	0.925022	0.998091		1.0089	0.996631	1.01651	1.04273	1.02215	1.00379	0.956704	0.996725	0.0118424
12.0667				1.01231	1.02132	1.01584	1.04602	1.03214	1.009	0.948585	1.01217	0.0116442
12.1		0.997305		1.01225	1.02157	1.01676	1.03281	1.02421	1.00356	0.954483	1.00787	0.00861386
12.1333				1.01844	1.01947	1.01195	1.04383	0.987255	0.99866	0.943134	1.00325	0.0120585
12.1667	0.951312			1.01463	1.02072	1.01345	1.04027	0.987708	0.998475	0.948577	0.996894	0.0116017
12.2	0.965167			1.01756	1.02282	1.01021	1.05177	0.990595	1.00482	0.94668	1.0012	0.0117797
12.2333				1.01869	1.01716	1.0109	1.06097	0.995302	0.994354	0.949068	1.00663	0.0127424
12.2667	0.956314	0.989701		1.02163	1.0332	1.00634	1.05147	0.994025	1.00289	0.949844	1.0006	0.0110743
12.3	0.95679	1.00332		1.02279	1.0083	1.00727	1.05152	0.983043	1.00423	0.945694	0.998107	0.0107986
12.3333				1.01977	1.03314	1.00732	1.05968	1.02691	0.993481	0.954887	1.0136	0.0125465
12.3667	0.963185	1.00266		1.02009	1.02388	1.01113	1.05906	1.0296	1.00563	0.958466	1.00819	0.0105258
12.4	0.925318			1.01214	1.01522	1.01141	1.06321	0.984569	0.985106	0.958264	0.994404	0.0146591
12.4333				1.02631	1.02546	1.00735	1.06168	0.991613	0.990697	0.954313	1.0082	0.0128837
12.4667				1.02526		1.01251	1.05838	1.02041	0.996877	0.960225	1.01228	0.0132997
12.5				1.0301	1.02388	1.01705	1.07866	0.995767	0.991884	0.9564	1.01339	0.0143792
12.5333				1.02075	1.01864	1.0211	1.05192	1.00444	0.997459	0.96471	1.01129	0.0101162
12.5667	0.959126	1.00099		1.0173	1.0279	1.01972	1.07895	1.02932	1.00218	0.959368	1.01054	0.0122965
12.6				1.01963	1.02524	1.00656	1.07949	1.00012	1.00678	0.961187	1.01415	0.0133955
12.6333	0.962203	1.00333		1.01222	1.02418	1.01614	1.08423	1.00402	0.988415	0.968149	1.00699	0.0119344
12.6667				1.01736	1.02502	1.00662	1.07724	1.02552	0.987998	0.961876	1.01452	0.0135492
12.7				1.01701	1.0337	1.01229	1.06912	0.990948	0.98541	0.966036	1.01064	0.012918
12.7333				1.01697	1.02187	1.01827	1.08089	0.990045	0.983287	0.951173	1.00893	0.0153125
12.7667	0.959378			1.02349	1.01287	1.01338	1.08752	1.04027	0.999781	0.961879	1.01232	0.0146792
12.8	0.920223			1.01831	1.01233	1.01975	1.09024	0.993515	0.991902	0.952974	0.999906	0.0177802
12.8333		0.999923		1.01986	1.01609	1.01936	1.08293	0.995598	0.988064	0.961425	1.01041	0.0124562
12.8667				1.01884	1.02375	1.02487	1.08638	0.990516	0.982814	0.951831	1.01129	0.0160455
12.9	0.958135			1.00912	1.03199	1.02021	1.08972	1.02007	0.991672	0.96901	1.01124	0.014478
12.9333		0.997489		1.01526	1.02341	1.00846	1.06122	1.02645	0.972688	0.965883	1.00886	0.0108468
12.9667	0.930427			1.01741	1.02765	1.0178	1.09086	0.988371	0.998537	0.955296	1.00329	0.0171807
13				1.01658		1.01629	1.08928	0.990606	1.00882	0.964836	1.0144	0.0169987
13.0333		0.991745		1.02901	1.02541	1.01267	1.0996	0.993701	0.986416	0.965723	1.01303	0.0144397
13.0667				1.02307	1.0235	1.00811	1.07866	0.989757	0.997801	0.961133	1.01172	0.0137988
13.1	0.942321	0.99704		1.03063		1.017	1.09408	0.992891	0.997428	0.960822	1.00403	0.016299
13.1333	0.972461			1.02654	1.0332	1.01363	1.09092	0.989473	0.998384	0.961473	1.01076	0.0144477
13.1667	0.958594			1.01327	1.02079	1.01498	1.08876	1.02419	0.990818	0.960728	1.00902	0.0146309
13.2				1.01599	1.02119	1.00761	1.07954	1.01328	0.995872	0.964943	1.01406	0.0130265
13.2333				1.01613	1.02445	1.0146	1.08691	1.0253	1.00792	0.966519	1.02026	0.0134291
13.2667	0.916166			1.02116		1.01113	1.09728	0.991615	0.997349	0.955749	0.998635	0.0213167
13.3				1.02504	1.01682	1.008	1.0971	1.01827	0.988925	0.965453	1.01709	0.0154373
13.3333	0.968483			1.01953	1.02172	1.01086	1.09034	1.03117	1.00569	0.964271	1.01401	0.0139104
13.3667	0.974783			1.00943		1.01298	1.08776	0.987751	1.00902	0.969182	1.00727	0.0149655
13.4		1.00315		1.01947	1.02355	1.01175	1.0846	1.01488	0.999746	0.959327	1.01456	0.0122617
13.4333	0.95816			1.0154		1.01063	1.09546	0.99498	0.987555	0.971754	1.00485	0.0169214
13.4667				1.01935	1.01812	1.01033	1.10065	1.02304	1.00167	0.972849	1.02086	0.0147722
13.5				1.01314	1.012	1.00726	1.09384	1.02467	0.997037	0.96346	1.01592	0.0149248
13.5333				1.01769	1.03087	1.00808	1.09361	0.989494	0.989539	0.966837	1.01373	0.015502
13.5667	0.929537			1.02565	1.02245	1.00586	1.08811	1.01926	0.984726	0.969191	1.0056	0.0164903
13.6	0.961079			1.02139	1.02001	1.00976	1.09081	0.998744	0.987153	0.967144	1.00701	0.014372
13.6333				1.01795		1.01064	1.08603	0.994904	0.985626	0.969645	1.0108	0.016624
13.6667	0.963093	0.993167		1.01912	1.02436	1.01	1.09184	1.02466	0.985214	0.977825	1.00992	0.0125471
13.7	0.932043	1.00736		1.02898	1.03057	1.00405	1.08972	0.99549	0.988383	0.961124	1.00419	0.0149173
13.7333				1.02342	1.01964	1.00968	1.09176	0.983728	0.972383	0.968545	1.00988	0.0160215
13.7667	0.926734	0.992482		1.02088		1.01656	1.09208	1.00928	0.987385	0.966917	1.00154	0.0168684
13.8	0.975318	1.00066		1.03052		1.01083	1.09773	1.02378	0.983541	0.96388	1.01078	0.0148926
13.8333		1.00351		1.02222	1.02488	1.00966	1.09508	1.02321	0.97453	0.977342	1.0163	0.0132507
13.8667				1.02475	1.02546	1.00333	1.08502	1.01563	0.963917	0.970566	1.01267	0.0152671
13.9	0.927352			1.00672	1.0227	1.01318	1.0904	1.01607	0.992444	0.973137	1.00525	0.0163665
13.9333	0.943206			1.01899	1.02158	1.00565	1.08848	0.995003	0.99688	0.969408	1.0049	0.0150539
13.9667	0.952491	0.992343		1.018	1.02969	1.01182	1.09808	1.02333	0.993939	0.963663	1.00926	0.0141474
14		0.998297		1.01434	1.01594	1.01061	1.08161	1.02788	0.995641	0.967682	1.014	0.0115793
14.0333		1.00303		1.02873	1.02784	1.01733	1.08007	1.01505	0.999147	0.962329	1.01669	0.0117558
14.0667				1.02397		1.01219	1.09288	0.986055	0.994905	0.971315	1.01355	0.017599
14.1	0.977989			1.02373	1.0172	1.01404	1.08801	0.98919	0.993231	0.96076	1.00802	0.0136761
14.1333		0.998018		1.01801	1.01752	1.01255	1.10158	0.985333	1.01042	0.969295	1.01409	0.0138804
14.1667	0.944953	0.995709		1.00735	1.02624	1.01049	1.09906	1.01073	1.00881	0.9682	1.00795	0.0141174
14.2	0.968492			1.01779	1.02507	1.00599	1.10298	0.98924	0.998084	0.960458	1.00851	0.0156308
14.2333		0.999673		1.01744	1.0282	1.00777	1.07734	1.02628	0.979247	0.971851	1.01347	0.0116509
14.2667	0.973696			1.01427	1.02005	1.01356	1.09481	0.997114	0.980701	0.965755	1.00749	0.0143769
14.3	0.922411			1.01465	1.0198	1.01055	1.0889	1.01967	1.00048	0.972514	1.00612	0.0166284
14.3333				1.01685	1.01025	1.01435	1.09944	0.993259	1.00019	0.97065	1.015	0.0152875
14.3667	0.964332			1.01859	1.01853	1.00824	1.10672	0.9991	1.00148	0.959372	1.00955	0.0160036
14.4	0.95387			1.02081	1.00384	0.996922	1.0981	0.975769	0.991304	0.961454	1.00026	0.0160118
14.4333	0.941341			1.02197	1.01932	1.00657	1.10284	0.993383	1.00364	0.963405	1.00656	0.0168862
14.4667		0.986174		1.02294	1.03403	1.00704	1.09936	1.0215	0.970198	0.97121	1.01406	0.0148776
14.5	0.967905	0.9444		1.02357		1.01022	1.10385	0.993149	1.00365	0.964618	1.00142	0.0173523
14.5333				1.02362		0.976856	1.10148	0.989716	0.970344	0.967548	1.00493	0.0210439
14.5667	0.938961			1.02416		1.00843	1.10168	1.01298	1.0008	0.979933	1.00956	0.0186765
14.6	0.975394	0.99926		1.01811	1.02273	1.00692	1.09681	1.00897	1.00432	0.972349	1.01165	0.0120835
14.6333		1.00098		1.02275	1.01706	1.00823	1.09475	1.01098	1.00084	0.971976	1.01595	0.0124832
14.6667				1.01617	1.02125	1.00593	1.11547	1.01594	1.00568	0.965989	1.02092	0.0172246
14.7				1.02365	1.01747	1.01032	1.1018	1.01713	0.981915	0.979387	1.01881	0.0153556
14.7333				1.03108		0.99951	1.09702	0.987016	1.00606	0.9695	1.01503	0.0184013
14.7667		1.0027		1.02231	1.01997	1.01065	1.0979	1.01212	0.996807	0.961158	1.01545	0.0136001
14.8	0.97098			1.02938	1.02439	1.00707	1.11045	0.996677	0.999991	0.969528	1.01356	0.0158216
14.8333	0.971091			1.03306		1.00389	1.10482	1.01242	0.997017	0.961691	1.012	0.0179647
14.8667				1.01913	1.00477	1.00989	1.09622	1.01812	1.01095	0.96514	1.01775	0.0148036
14.9				1.0243		1.00627	1.10567	1.01725	1.01411	0.973041	1.02344	0.0180031
14.9333	0.968895	0.990603		1.02198	1.01721	1.01084	1.10025	1.01092	0.998634	0.967837	1.00968	0.0130775
14.9667				1.02792	1.00993	1.00267	1.09472	0.99169	1.00236	0.96284	1.01316	0.0155078
15	0.955853			1.01787	1.01904	1.00754	1.07489	0.989742	1.00492	0.958485	1.00354	0.0133951
15.0333	0.95363			1.02089	1.02379	1.00472	1.09913	1.01252	1.00845	0.966075	1.01115	0.0154606
15.0667				1.02354	1.01278	1.00244	1.09699	1.01296	1.00652	0.956793	1.016	0.0157472
15.1	0.964041			1.02787	1.02503	1.00998	1.09383	0.99429	1.00286	0.971061	1.01112	0.0143232
15.1333				1.02606	1.02417	1.00708	1.10165	1.01382	0.995134	0.976893	1.02069	0.0149597
15.1667	0.952339			1.03214	1.00059	0.997188	1.08479	1.02091	0.989146	0.973989	1.00639	0.0142727
15.2	0.942128			1.03398	1.02015	1.00052	1.10311	1.01972	0.977853	0.969201	1.00833	0.0173283
15.2333	0.963925			1.02207	1.02605	1.01189	1.10052	0.985177	0.991136	0.972149	1.00911	0.015308
15.2667	0.939027			1.02141	1.02536	1.00739	1.09991	0.997963	0.993839	0.968201	1.00664	0.0166678
15.3		0.990035		1.03029	1.00454	0.997105	1.09832	1.00714	1.00185	0.969252	1.01232	0.0136919
15.3333				1.02995	1.01835	1.00664	1.09264	1.02042	0.998567	0.975407	1.02028	0.0138044
15.3667		0.989174		1.03838	1.02301	1.00351	1.09626	1.00018	0.993118	0.972689	1.01454	0.013693
15.4	0.970264	0.995924		1.03077	1.02215	0.996419	1.09929	0.986691	0.995577	0.98034	1.0086	0.0129778
15.4333		0.987939		1.02966		1.00562	1.09787	0.99104	0.996372	0.971969	1.0115	0.015878
15.4667		1.00186		1.02277	1.01976	1.00034	1.09508	1.01529	0.993345	0.969711	1.01477	0.0129581
15.5	0.941838			1.02122	1.02403	0.999677	1.0966	0.981702	0.993698	0.972591	1.00392	0.0162267
15.5333	0.98199			1.02983	1.02082	1.00101	1.09655	0.98595	1.00161	0.966812	1.01057	0.0142539
15.5667		0.993622		1.02744	1.02068	0.995681	1.08321	0.984558	0.99874	0.968693	1.00908	0.0124814
15.6				1.02661	1.03399	0.998616	1.08313	0.9932	1.00137	0.97005	1.01528	0.0138762
15.6333				1.03307	1.02479	1.00002	1.09386	1.0207	0.995738	0.969568	1.01968	0.0147842
15.6667				1.0292	1.02808	1.00294	1.09275	1.01049	0.981459	0.971686	1.01666	0.0150919
15.7	0.972136	1.00161		1.02856	1.01725	1.01361	1.08674	0.98648	0.976913	0.96602	1.00548	0.0124733
15.7333	0.97487			1.03222	1.02487	1.0058	1.08758	1.01119	0.97945	0.972449	1.01105	0.0135761
15.7667				1.03395		0.99624	1.09389	1.00693	0.988622	0.971651	1.01521	0.0178646
15.8	0.946966	0.996346		1.03312		1.00642	1.08432	0.991062	0.976695	0.9709	1.00073	0.014964
15.8333				1.02887	1.02164	1.00474	1.08694	0.982206	0.980849	0.972721	1.01114	0.0149938
15.8667				1.03063	1.02343	1.00407	1.0698	1.02179	0.987471	0.971585	1.01554	0.0120758
15.9	0.939222			1.0306		0.999527	1.09394	0.974246	0.980157	0.970847	0.998363	0.0191133
15.9333				1.03784	1.02909	1.00672	1.09577	0.967137	0.975402	0.967869	1.0114	0.0177964
15.9667	0.980004	0.996744		1.03116	1.02099	0.999158	1.07825	0.984796	0.980409	0.985837	1.00637	0.010799
16	0.973592			1.02688	1.01998	1.00144	1.09262	1.00053	0.983278	0.970893	1.00865	0.0139692
16.0333	0.966189			1.03571	1.02209	0.997468	1.08612	0.988018	0.975319	0.976707	1.00595	0.014231
16.0667		0.995222		1.03082	1.0017	1.00014	1.1022	1.00718	0.97605	0.971381	1.01059	0.0146194
16.1	0.959976			1.02567	1.0098	0.993461	1.10357	1.00758	0.94806	0.976885	1.00313	0.0170804
16.1333		0.995114		1.02228	1.02494	0.995543	1.08438	0.994407	0.986322	0.971307	1.00929	0.012417
16.1667	0.930813	1.00001		1.02851	1.02433	1.0009	1.09982	1.01907	0.975798	0.978026	1.00636	0.0154669
16.2	0.961033	0.99644		1.0279	1.01038	0.997103	1.10079	0.980382	0.98089	0.981561	1.00405	0.013707
16.2333		1.00352		1.02659		0.995456	1.09798	0.984984	0.980734	0.980057	1.0099	0.0159219
16.2667		1.00159		1.02996	1.03147	0.999199	1.09638	0.986645	0.976538	0.970703	1.01156	0.0144534
16.3		1.00793		1.04147	1.02884	0.989377	1.10744	1.01753	0.977549	0.961637	1.01647	0.016026
16.3333	0.959793	1.00476		1.03275		0.9877	1.10515	0.990015	0.982025	0.971624	1.00423	0.0163684
16.3667	0.967293			1.02894		0.990815	1.10834	1.00379	0.98272	0.973697	1.00794	0.0184471
16.4	0.963573	0.992697		1.03684	1.02664	0.996538	1.10358	0.969706	0.983237	0.979865	1.00585	0.0146645
16.4333	0.927434			1.03812	1.00639	0.995987	1.103	1.01327	0.978504	0.970623	1.00417	0.0182971
16.4667	0.930393			1.03124		0.986236	1.10526	1.00887	0.980689	0.973924	1.00237	0.0208062
16.5				1.03338	1.02212	0.987256	1.09521	1.01422	0.980719	0.975814	1.01553	0.0156609
16.5333				1.02883	1.02523	0.994076	1.09611	1.00721	0.978735	0.976314	1.01521	0.0155722
16.5667	0.932113	0.996704		1.03462	1.01474	0.992405	1.10995	1.01009		0.966176	1.0071	0.0184321
16.6	0.956615			1.03483	1.01476	0.995303	1.10201	1.00727		0.977114	1.01256	0.0177376
16.6333	0.949697			1.03016		1.00294	1.09406	1.00691		0.965728	1.00825	0.020904
16.6667				1.02971		0.999673	1.10115	0.984345		0.973869	1.01775	0.0228775
16.7		0.998592		1.0274	1.00308	0.994168	1.09558	1.01012		0.972376	1.01447	0.0149052
16.7333		0.995483		1.03136	1.02376	0.992378	1.10077	0.987261		0.979728	1.01582	0.0158888
16.7667	0.960755			1.02258	1.02711	0.987823	1.10319	1.0073		0.974662	1.01192	0.017783
16.8				1.02684	1.02386	0.992304	1.10086	0.993983		0.982833	1.02011	0.0177252
16.8333				1.03829	1.02443	0.992371	1.09825	1.01773		0.978155	1.02487	0.0171802
16.8667	0.944153			1.03036	1.01197	0.995304	1.09684	0.983496		0.981758	1.00627	0.0182011
16.9				1.03446	1.02653	0.996756	1.0894	0.986146		0.976534	1.0183	0.0169567
16.9333	0.977011	0.998639		1.03022	1.02172	0.993572	1.09891	0.999361		0.975139	1.01182	0.014167
16.9667	0.957323	1.0102		1.03204	1.01483	0.988913	1.097	0.977693		0.982441	1.00755	0.0152672
17				1.02934	1.02168	0.989912	1.0968	1.00769		0.976324	1.02029	0.0172735
17.0333	0.933374	0.998495		1.02985		0.992321	1.10234	1.00992		0.974356	1.00581	0.0197511
17.0667	0.948685	1.00397		1.01603	1.00374	0.984147	1.10128	1.01655		0.972459	1.00586	0.0159166
17.1	0.952188	0.999105		1.01903	1.00299	0.987232	1.09298	0.97914		0.975409	1.00101	0.0149389
17.1333				1.02528	1.01592	0.99175	1.09864	1.01808		0.98205	1.02195	0.0167809
17.1667				1.03576		0.992218	1.09997	1.01037		0.980614	1.02379	0.021199
17.2	0.949168	1.00412		1.03596	1.01162	0.988904	1.10155	1.00722		0.978236	1.0096	0.015954
17.2333	0.95914	0.992339		1.02908	1.0255	0.993817	1.08501	1.00772		0.983991	1.00957	0.0134103
17.2667	0.964965	0.995237		1.02695	1.0199	0.998267	1.09225	0.997595		0.979886	1.00938	0.0137529
17.3	0.96958	0.998176		1.02559	1.0152	0.999285	1.10957	1.0142		0.98044	1.01401	0.0151402
17.3333	0.963038			1.03442	1.00676	0.989971	1.10729	1.00162		0.98444	1.01251	0.0178337
17.3667	0.962669			1.03322	1.01473	0.98809	1.0979	1.00781		0.979406	1.01197	0.0168478
17.4	0.956688	0.999349		1.02103	1.0212	0.996727	1.09866	0.992204		0.969248	1.00689	0.0153182
17.4333	0.958717			1.02835	1.01298	0.998968	1.1013	1.00286		0.97519	1.01119	0.0173789
17.4667	0.951013	0.998855		1.0304	1.02788	0.998347	1.10244	0.989996		0.973373	1.00904	0.0162321
17.5	0.962633			1.02985	1.02287	0.984355	1.10573	1.00819		0.976717	1.01291	0.0180459
17.5333	0.955321	0.992397		1.03505	1.01555	0.992482	1.10219	0.997017		0.980816	1.00885	0.0156825
17.5667	0.961017	0.998923		1.02964	1.02229	0.987824	1.10295	0.999747		0.981836	1.01053	0.0152866
17.6		0.996993		1.02832	1.02732	0.993147	1.0986	1.00403		0.974529	1.01756	0.0153
17.6333	0.956718	0.997312		1.02535	1.00662	0.98994	1.10165	1.00815		0.974792	1.00757	0.015379
17.6667		0.998161		1.02831	1.01549	0.999988	1.10419	0.998778		0.97891	1.01769	0.0155508
17.7	0.95252			1.02753	1.01605	0.992464	1.10513	1.00207		0.97383	1.00994	0.0185011
17.7333	0.951753			1.03757	1.01576	0.988196	1.0957	1.00187		0.962257	1.00758	0.0184583
17.7667	0.967038			1.0309	1.0291	0.99258	1.1011	0.96568		0.962291	1.00696	0.0191644
17.8	0.962218			1.02192	1.01377	0.995152	1.10922	0.973986		0.965755	1.006	0.0193018
17.8333	0.937942			1.02781	1.02633	0.999193	1.10799	0.970432		0.969531	1.0056	0.0210237
17.8667				1.02776	1.01969	0.993644	1.10663	1.0006		0.974769	1.02052	0.0188681
17.9	0.957256			1.02847	1.01555	0.995753	1.09428	0.998287		0.966792	1.00805	0.0172082
17.9333				1.023	1.01241	0.995201	1.09739	0.99717		0.977335	1.01708	0.0172825
17.9667				1.02729	1.00697	0.990703	1.09634	0.972986		0.983521	1.01297	0.0183972
18	0.937673			1.02776	1.02301	0.983534	1.11015	0.986175		0.981213	1.00707	0.0205763
18.0333	0.956744			1.04071		0.98113	1.09485	0.998821		0.974901	1.00786	0.0209297
18.0667	0.960878			1.02588	1.01586	0.994613	1.10072	0.982759		0.970417	1.00731	0.0178787
18.1	0.958297			1.02677	1.01554	0.983929	1.10123	1.00108		0.979702	1.00951	0.0175818
18.1333	0.952462			1.0373	1.0208	0.990872	1.09225	0.980678		0.976937	1.00733	0.0177322
18.1667	0.960483			1.03483	1.01083	0.980182	1.102	1.00917		0.976187	1.01052	0.0179704
18.2	0.958044			1.02662		0.984801	1.09623	0.998353		0.987279	1.00855	0.0197366
18.2333	0.956228			1.02897	1.0147	0.992015	1.08825	1.00205		0.984088	1.00947	0.0157752
18.2667	0.952037			1.02756	1.00838	0.984309	1.10305	1.00783		0.983906	1.00958	0.0180434
18.3				1.03091	1.01	0.989054	1.09911	1.00073		0.979174	1.01816	0.0177508
18.3333	0.9563			1.02524	1.01462	0.981747	1.0994	0.983929		0.978891	1.00573	0.0178941
18.3667	0.95118			1.0254	1.01999	0.983835	1.09255	0.973557		0.9829	1.0042	0.0176765
18.4	0.955673			1.03275	1.0159	0.988619	1.0898	1.01617		0.986276	1.01217	0.016107
18.4333	0.956595			1.02995	1.00525	0.982886	1.09644	1.00144		0.979903	1.0075	0.0171933
18.4667	0.957925			1.02432	1.01837	0.984893	1.08438	1.003		0.967267	1.00574	0.0161082
18.5	0.969134			1.02545	1.00329	0.985143	1.0931	1.02079		0.981058	1.01114	0.0157527
18.5333	0.961485			1.03342		0.983775	1.09978	1.0054		0.980351	1.0107	0.0204514
18.5667	0.9521			1.02881	1.01142	0.983137	1.08631	0.97816		0.98695	1.00384	0.01657
18.6	0.950327			1.03559	1.01633	0.994977	1.08292	0.980109		0.984959	1.00646	0.0163525
18.6333	0.952757			1.04054	1.02162	0.988837	1.10027	1.00518		0.982568	1.01311	0.0180276
18.6667				1.02338	1.01282	0.988101	1.08808	0.998695		0.976512	1.0146	0.0162125
18.7	0.955297			1.03047	1.01154	0.985897	1.06206	1.01776		0.99017	1.0076	0.0130186
18.7333	0.952207			1.03062	1.02069	0.991477	1.08928	0.999721		0.987115	1.01016	0.0162841
18.7667				1.0233	1.0118	0.993422	1.05896	1.00039		0.984044	1.01199	0.0109456
18.8	0.949946			1.03524	1.01043	0.992942	1.07997	1.00435		0.983667	1.00808	0.0155304
18.8333	0.961081			1.0255	0.995888	0.997526	1.08586	0.999685		0.982529	1.00687	0.0150675
18.8667	0.957619			1.02598	1.01451	0.983168	1.0783	1.00425		0.98437	1.00688	0.0146596
18.9	0.952255			1.02483	1.00428	0.982251	1.07856	1.01125		0.991641	1.00644	0.0148863
18.9333				1.02699	1.00415	0.988396	1.09229	1.00561		0.984797	1.01704	0.0162459
18.9667	0.95386			1.03171	1.00555	0.981006	1.07619			0.973946	1.00371	0.018191
19	0.949052			1.02733	0.992433	0.983456	1.07295	1.00606		0.983216	1.00207	0.0148674
19.0333	0.94766			1.03428	1.0147	0.988032	1.05918	1.00835		0.985041	1.00532	0.0136897
19.0667				1.03097	1.00087	0.990563	1.0759	1.00068		0.998325	1.01622	0.0132099
19.1	0.949849			1.03013	1.0098	0.984847	1.0786	1.01598		0.986319	1.00793	0.0153756
19.1333				1.02968	1.01017	0.986378	1.07389	1.01502		0.984698	1.01664	0.0134518
19.1667	0.948298			1.02871	1.01404	0.978627	1.0776	0.994809		0.985908	1.004	0.01565
19.2	0.953348			1.0311	1.01877	0.984025	1.07737	0.982637		0.980824	1.00401	0.0156553
19.2333	0.964538			1.02643	1.00104	0.979918	1.07872	1.00005		0.990422	1.00587	0.0141481
19.2667	0.959985			1.02538	1.01653	0.978573	1.06719	1.01831		0.988357	1.00776	0.0133995
19.3	0.951599			1.03806		0.983055	1.06986	1.01262		0.988647	1.00731	0.0172504
19.3333	0.948232			1.03408	1.00255	0.971242	1.07225	1.00404		0.988025	1.00292	0.0154262
19.3667	0.957905			1.04121	1.00858	0.987827	1.07641	0.986646		0.981546	1.00573	0.0152904
19.4	0.943843			1.0361	1.00331	0.989411	1.07142	0.984612		0.995351	1.00344	0.0153193
19.4333	0.952601			1.03172	1.00532	0.993975	1.06926	1.00695		0.9952	1.00786	0.0135872
19.4667	0.956588			1.03219	1.0036	0.995261	1.03899	0.977562		0.992257	0.999493	0.0109521
19.5	0.951412			1.02492	1.01761	0.995578	1.07228	0.989748		0.976518	1.00401	0.014703
19.5333	0.952104			1.02498	1.00622	0.986404	1.07563	1.00322		0.975513	1.00344	0.0149509
19.5667	0.957651			1.03735	0.993396	0.992407	1.06541	1.00826		0.975417	1.00427	0.0138989
19.6	0.952852			1.02902	0.996004	0.999933	1.06962	1.00494		0.984309	1.00524	0.0138071
19.6333	0.957521			1.03996	1.00622	0.992474	1.06968	1.00296		0.986499	1.0079	0.0138921
19.6667	0.953892			1.03286	1.00247	0.987282	1.07486	1.01588		0.988345	1.00794	0.0145773
19.7	0.944602			1.02604	1.00795	0.987356	1.0433	1.02432		0.977156	1.00153	0.0128566
19.7333	0.949171			1.02759	0.996258	0.989913	1.07932	1.01073		0.982987	1.00514	0.0154091
19.7667	0.95329			1.03485	1.01152	0.997334	1.06662	1.01483		0.983154	1.0088	0.0137464
19.8	0.951975			1.03775	1.0025	0.985301	1.062	0.991822		0.98369	1.00215	0.0138856
19.8333	0.95331			1.03171	1.00328	0.997028	1.07425	0.973636		0.983615	1.0024	0.0151508
19.8667	0.958368			1.03232	0.988811	0.985317	1.07007	0.99949		0.97565	1.00143	0.0143158
19.9				1.028		0.990968	1.07418	0.987993		0.989066	1.01404	0.0168022
19.9333	0.946953			1.03599	0.998138		1.07962	1.0126		0.988034	1.01022	0.0183729
19.9667	0.95322			1.03713	0.98878	0.992185	1.06028	1.0057		0.982941	1.00289	0.0134985
20	0.964114			1.03598	0.998405	0.995165	1.07058	1.01138		0.98997	1.00937	0.0130982
20.0333	0.938923			1.02891	0.994599	0.990665	1.06606	0.993044		0.980814	0.999003	0.0150051
20.0667	0.948838			1.03876	0.997451	0.983364	1.06302	1.00084		0.978137	1.00149	0.0145053
20.1				1.02759	1.0004	0.982793	0.883491	1.0159		0.979435	0.981601	0.0210367
20.1333				1.03106	1.00695	0.98885	1.05255	1.01382		0.972854	1.01101	0.0116887
20.1667	0.951696			1.02814	0.993733	0.991028	1.03029	0.993468		0.981997	0.995765	0.0102399
20.2	0.954274			1.02889	0.994931	0.986382	1.05662	1.01723		0.973138	1.00164	0.0132215
20.2333	0.953423			1.03723		0.985687	1.05051	1.01278		0.983947	1.00393	0.0148781
20.2667	0.954609			1.03456	1.00938	0.989035	1.04862	1.0158		0.984514	1.00522	0.0120764
20.3	0.953168			1.03341	1.00907	0.994265	1.06033	1.00087		0.986288	1.00534	0.0129584
20.3333	0.947168			1.0341	1.00535	0.989776	1.0419	1.02858		0.976068	1.00328	0.0130538
20.3667	0.95246			1.0358	1.00632	0.980357	1.04651	1.01767		0.984632	1.00339	0.0125349
20.4	0.948546			1.02915	1.0058	0.983263	1.02611	1.02345		0.986506	1.0004	0.0111523
20.4333	0.948586			1.03413	0.997117	0.984759	1.05002	1.023		0.993417	1.00443	0.0128971
20.4667	0.955172			1.03422		0.983461	1.05286	1.02271		0.981255	1.00495	0.0152411
20.5	0.95003			1.02993	1.01044	0.984792	1.05118	1.02075		0.969297	1.00234	0.0135283
20.5333	0.961003			1.03119	1.00208	0.98095	1.05162	1.02304		0.979411	1.00419	0.0123036
20.5667	0.957747			1.03022	1.00486	0.982714	1.05343	1.02052		0.978369	1.00398	0.0125869
20.6	0.957714			1.02444	0.993997	0.991968	1.06822	1.01707		0.953352	1.00097	0.0151192
20.6333				1.02243	0.995677	0.99252	1.0633	1.03931		0.986061	1.01655	0.0124912
20.6667	0.962421			1.03612	1.00117	0.983625	1.04842	0.999298		0.972664	1.00053	0.0120281
20.7	0.957525			1.03092	0.998761	0.989772	1.05421	1.02106		0.973908	1.00374	0.0127537
20.7333	0.94943			1.03647	1.00357	0.98564	1.07061	1.03539		0.980098	1.00874	0.015588
20.7667	0.956396			1.03677		0.997236	1.07444	1.02868		0.970056	1.0106	0.0181182
20.8	0.954388			1.03227	0.997833	1.00084	1.06797	1.00112		0.967615	1.00315	0.0144154
20.8333	0.948563			1.03752	1.00383	0.994838	1.0735	1.03429		0.967541	1.00858	0.0163381
20.8667	0.952203			1.0315	0.995457	0.990927	1.05833	1.01617		0.96865	1.00189	0.0138028
20.9	0.953747			1.03553			1.05904	1.01888		0.970295	1.0075	0.019805
20.9333				1.03373	1.00335	0.989962	1.0619	1.01933		0.966873	1.01252	0.0136759
20.9667	0.95655			1.03131	0.995661	0.987085	1.06645	1.0228		0.976365	1.00517	0.0141087
21	0.952899			1.03231	1.00392	0.973141	1.08211	1.02656		0.969101	1.00572	0.0170244
21.0333	0.965499			1.02954	1.00485	0.985845	1.04999	1.00951		0.962195	1.00106	0.012245
21.0667	0.951202			1.02221	1.00087	0.990006	1.08648	1.00224		0.968757	1.00311	0.016451
21.1	0.956098			1.02959	0.995693	0.980594	1.08364	1.03158		0.976445	1.00766	0.0164277
21.1333	0.959975			1.02603	0.992864	0.988295	1.03146	1.02278		0.970996	0.998913	0.0107001
21.1667	0.960729			1.03324	0.998042	0.980907	1.06316	1.02294		0.971597	1.00437	0.0139757
21.2	0.954804			1.02814	0.995681	0.98412	1.05437	0.993561		0.979865	0.998649	0.0124364
21.2333				1.03669		0.979305	1.03911	1.01265		0.964106	1.00637	0.0150823
21.2667	0.948975			1.03534	0.985883	0.984035	1.04398	0.993918		0.966852	0.99414	0.013035
21.3	0.964974			1.03502	0.985981	0.984837	1.02226	1.02647		0.9743	0.99912	0.0106131
21.3333	0.964615			1.03392	0.986756	0.98019	1.03974	1.0169		0.968318	0.998633	0.0117775
21.3667	0.957799			1.02622		0.976876	1.03815	1.01266		0.974644	0.997727	0.0132051
21.4	0.971321			1.0368	0.986814	0.987499	1.04201	1.00083		0.96915	0.999204	0.0111482
21.4333	0.969977			1.02958	0.984917	0.99166	1.048	1.01582		0.967072	1.00101	0.0116552
21.4667	0.973081			1.03322	0.97913	0.983683	1.03653	1.0136		0.96052	0.997109	0.0114951
21.5	0.967419			1.03423	0.97344	0.981768	1.04162	1.01187		0.956057	0.995199	0.0128296
21.5333	0.975869			1.04189	0.98543	0.989398	1.04042	1.00249		0.965923	1.0002	0.0114047
21.5667	0.966942			1.03451	0.982571	0.990139	1.03179	0.999279		0.961717	0.995278	0.010917
21.6	0.976366			1.0319	0.9861	0.981841	1.02097	1.00782		0.95815	0.994736	0.00994942
21.6333	0.887425			1.02591	0.984473	0.989626	1.03872	0.998552		0.951611	0.982331	0.0191177
21.6667	0.975266			1.03787	0.961416	0.981966	1.0374	1.01247		0.955913	0.994615	0.0130524
21.7	0.965601			1.03392	0.973292	0.987658	1.04586	1.02145		0.952741	0.997217	0.0137508
21.7333	0.976347			1.0304	0.98055	0.977004	1.03794	1.01345		0.943325	0.994147	0.0128951
21.7667				1.03399	0.979249	0.988804	1.04558	0.994807		0.951009	0.998906	0.014386
21.8	0.97425			1.02399	0.987169	0.987103	1.0391	1.00749		0.949741	0.99555	0.011487
21.8333	0.959459			1.03366	0.975009	0.984128	1.0375	1.00473		0.952206	0.992385	0.012873
21.8667				1.02492	0.98415	0.985998	1.0405	0.981607		0.940944	0.993019	0.0144244
21.9	0.958247			1.0241	0.963636	0.986608	1.04702	0.999824		0.95064	0.990011	0.0136057
21.9333	0.971385			1.03682	0.976984		1.04123	0.997932		0.948412	0.99546	0.015216
21.9667	0.955166			1.0393	0.990353		1.03849	0.990853		0.938152	0.992053	0.0169897
22	0.969451			1.04209	0.970565		1.05723	0.995755		0.949897	0.997499	0.0176426
22.0333	0.965943			1.03619	0.986512		1.03941	0.987524		0.944589	0.993362	0.0154561
22.0667	0.961677			1.04565	0.994051		1.03193	0.973081		0.947506	0.992317	0.0160564
22.1	0.96032			1.0451	0.983038			1.00077		0.948063	0.987458	0.0170407
22.1333	0.963254			1.03289				0.991226		0.95596	0.985833	0.0174299
22.1667	0.959338			1.0378				0.994373		0.953542	0.986263	0.019402
22.2	0.956592			1.02741				0.995307			0.993104	0.0204735
22.2333	0.955437			1.04474				0.987028			0.995733	0.0261431
22.2667	0.948155			1.04213				0.997856			0.996048	0.0271446
22.3	0.95932			1.03733				0.99372			0.996792	0.0225734
22.3333	0.953545			1.04055							0.997046	0.0435015
22.3667	0.947594			1.04323							0.995411	0.0478168

## Sheet: ED Figure 4C
	1	2	3	4	5	6	7	8	Mean	SEM
Time(s)		0.989611							0.982	0.00806
0.033333	0.972842	1.00794						0.992006	0.98445	0.01272
0.066667	0.977199	0.997729						0.971081	0.99382	0.00788
0.1	0.951329	0.996544			0.979534			1.01041	0.99726	0.00376
0.133333	0.980372	0.988001			0.990332			1.01659	0.98605	0.00667
0.166667	1.00861	0.998187	0.988173		0.989968			1.00134	0.99994	0.00273
0.2	1.00552	0.986103			0.979007	0.965957		0.993653	0.99982	0.00726
0.233333	0.997438	1.00682			0.994128	1.00138			1.00112	0.00313
0.266667	1.00185	1.01156	0.96497		1.00182	1.01378		1.00492	0.99915	0.00217
0.3	1.00783	1.00524	0.994226		0.999538	1.00943		0.99046	0.99824	0.00642
0.333333	1.0026	0.995914	1.00088	1.00371	0.992818	1.00653		0.991609	0.99449	0.00968
0.366667	1.00265	1.00835	0.986952	1.00825	1.01139	1.0058	0.964273		1.00848	0.00314
0.4	1.01427	1.00044	1.00196	0.931281	1.01337	1.01376	0.988112	0.99271	1.00884	0.0025
0.433333	1.01307	1.00642	1.00944	0.998697	1.00221	1.01017	1.02675	1.00109	1.00608	0.00876
0.466667	1.01411	1.00862	1.00679	1.01384	1.00025		1.01723	1.00104	1.00763	0.00389
0.5	1.02412	0.997054	1.0236	1.01738	1.01882	0.948907	1.00806	1.01067	1.01137	0.00246
0.533333	1.0116	0.995515	1.00624	1.02685	1.00976	1.0124	0.990674	1.00802	1.01715	0.00336
0.566667	1.0146	0.999969	1.01678		1.01706	1.01188	1.00489	1.01441	1.01332	0.00258
0.6	1.03102	1.00798	1.02242		1.01304		1.01401	1.01445	1.01575	0.00232
0.633333	1.01676	1.00624	1.00432	1.01556	1.02781	1.01386	1.0124	1.00964	1.01988	0.00446
0.666667	1.02323	1.0062	1.02088		1.01469	1.01771	1.00926	1.01825	1.01743	0.00214
0.7	1.0211	1.00227	1.01131	1.02118	1.02433		1.01846	1.0405	1.00957	0.00612
0.733333	1.0255	1.00829	1.01468	1.01502	1.01388	1.01686	1.0189	1.02632	1.01315	0.0048
0.766667	1.00754	1.00313	1.01383	1.00608	0.972796	1.0263	1.02532	1.02155	1.01507	0.00383
0.8	1.00142	0.997787	1.01066	0.997333	1.01572	1.03221	1.02304	1.027	1.01787	0.00416
0.833333	1.0053	1.01128	1.01926	1.00869	0.998756	1.03113	1.0236	1.02253	1.01759	0.00569
0.866667	1.00495	0.999011	1.02825	1.01579	1.0224	1.032	1.01317	1.02737	1.00674	0.00709
0.9	0.988791	1.00052	1.01675	1.02117	1.03315	1.03355	1.01579	1.031	1.00082	0.00951
0.933333	1.01185	1.00387	1.00218		0.973506	1.02185	1.00091	1.03303	1.01102	0.00367
0.966667	0.993744	1.00742	1.02203	0.939953	0.993785	1.02028	1.01401	1.01537	1.01303	0.00528
1	1.00528	1.01396	1.01225		1.00065	1.03039	1.00469	1.00994	1.01049	0.00538
1.03333	1.02211	1.00326	1.02318		0.996263	1.03523	1.00743	1.00377	1.00657	0.00453
1.06667	1.02163	0.993375	1.006	1.01611	0.986761	1.03377	1.0171	1.0092	1.00625	0.00289
1.1	0.996358	1.00203	1.01848	1.00755	0.987451	1.02922	1.00591	1.00555	1.01151	0.0044
1.13333	1.00578	1.0082	1.00206		1.00375	1.01723	1.01301	0.993742	1.00808	0.00573
1.16667	1.01357	0.992335	1.02045		1.00119	1.0271	1.01123	1.01469	1.00074	0.00426
1.2	1.01476	0.976735	1.01711	1.02449	1.00249	1.01597	1.02001	0.993093	1.01075	0.0048
1.23333	0.991372	0.990611	0.996833		1.00042	1.01924	1.01335	0.993369	1.01082	0.00325
1.26667	1.02483	0.999292	1.02081	1.01931	0.988628	1.01867	1.01752	0.99694	1.01189	0.00389
1.3	1.00102	1.003	1.00426	1.02437	1.00293	1.02144	1.01493	1.01463	1.00792	0.00353
1.33333	1.00976	1.0001	1.01495		0.997417	1.01982	1.01522	1.02596	1.00989	0.0048
1.36667	1.00017	0.997256	1.01501		0.998439	1.02114	1.01326	1.01018	1.00907	0.00411
1.4	1.01403	1.00121	1.01234		0.998087	1.00346		1.03021	1.00955	0.00385
1.43333	0.998188	0.995318	0.998964	1.02135	1.00089	1.01749	1.01947	1.02088	1.008	0.0034
1.46667	0.990773	0.999025	1.01642	1.0231	1.00476	1.01249	1.00996	1.01985	1.00665	0.00595
1.5	1.00398	0.999396	1.00504		1.00736	1.00237	1.01133	1.0265	1.00546	0.00548
1.53333	0.988507	0.993219	1.00803		1.00651	1.00858	1.00402	1.03769	1.00153	0.00449
1.56667	0.991594	0.996951	1.01552		1.00415	1.01315	0.988206	1.02861	1.00512	0.00689
1.6	0.988405	0.992042	1.01746		0.995658	1.01418	0.993254	1.00973	1.00871	0.00776
1.63333	0.979417	1.00148	1.01443		0.993731	1.03655	0.997563	1.01263	1.00739	0.00443
1.66667	0.998776	0.993678	1.01644		0.979049	1.04287	1.01203	1.01811	1.01368	0.00564
1.7	0.994511	1.00399	1.01345		0.995773		1.01786	1.01873	1.00159	0.00581
1.73333	1.00299	1.00134	1.01442	1.01735	0.986364	1.02996	1.02346	1.03359	1.01174	0.00362
1.76667	1.00141	0.998271	1.01682	1.00346	0.996283	0.969213	1.02535	1.00192	1.00489	0.00462
1.8	1.00739	1.00432	1.00775	1.01462	0.997793	1.0294	1.02292	1.00975	1.00622	0.00685
1.83333	0.990436	1.0082	1.00944	0.996727	0.9844	1.0222	1.01185	1.01585	1.00159	0.00706
1.86667	0.97894	0.993496	1.00822	1.02549	0.980751	1.02649	1.01705	1.0193	1.00142	0.00719
1.9	0.970036	1.00055	1.00683		0.99038	1.02815	0.998531	1.01663	1.00601	0.00596
1.93333	0.974345	1.00732	1.00673	1.02662	0.983194		0.992263	1.01944	1.00699	0.00451
1.96667	0.97341	1.0049	1.0215	1.0264	0.994121	1.00798	1.01664	1.00315	1.00685	0.00534
2	1.00582	0.993392	1.01503	1.02374	0.985659	1.00217	1.01454	1.01558	1.00574	0.00423
2.03333	0.987272	1.01268	1.01952	1.02254	0.990156	0.990836	1.0097	1.02206	1.00294	0.00526
2.06667	0.994452	1.01324	0.993864		0.994202	1.01696	1.00926	1.01818	1.00113	0.00592
2.1	0.993748	1.00667	1.01842		0.977905	1.01576	1.00793	1.00019	1.00169	0.00392
2.13333	0.989893	1.00487	1.01108		0.977543		1.00756	1.01582	0.99653	0.00368
2.16667	0.98846	0.991101	1.00828		0.997661	1.00809	1.00061	1.01766	1.00388	0.00419
2.2	0.984322	0.998319	1.00797		0.989212		0.99469	1.00469	1.00301	0.00478
2.23333	0.982844	1.00948	1.00431	1.01985	0.998639	1.01403	0.993714	1.00813	1.00132	0.00506
2.26667	0.999609	1.007	1.01082		0.995684	1.01892	0.986014		1.00836	0.00364
2.3	0.982541	1.00527	0.994131		0.988768	1.01766	1.00475	1.01613	1.00765	0.0034
2.33333	0.999569	1.00923	1.00322	1.02423	0.999596	1.02184	0.99753	1.01171	1.00407	0.00458
2.36667	0.993574	1.00523	1.00955	1.02085	0.996092	1.01223	1.00563	1.01804	1.00614	0.00506
2.4	0.998535	0.99465	1.00215	1.00356		1.01009	0.99161	1.0279	1.00509	0.00562
2.43333	1.00059	0.997372	0.999971	1.01916		1.00013	0.995076	1.03069	1.00262	0.00524
2.46667	0.998347	0.997401	1.00549			1.0064	0.99198	1.03094	1.00592	0.00619
2.5	0.997891	0.988259	1.01148	0.997107		1.00687	0.989214	1.02751	1.01211	0.0049
2.53333	1.00619	0.995086	1.01539		1.0029		0.986472	1.02947	1.00964	0.00563
2.56667	1.00739	1.00345	1.0107		0.998428	1.0225		1.03017	1.01177	0.00482
2.6	1.00005	0.99784	1.01058		1.00052	1.0145		1.03435	1.01087	0.00351
2.63333	1.01061	0.993837	1.01527		1.00272	1.02219	1.00572	1.03206	1.0099	0.00308
2.66667	1.00501	0.996627	1.01111	1.02133	0.999532	1.02019	1.01099	1.02214	1.0015	0.00452
2.7	1.01277	0.992484	1.01152	1.01738	1.00266	1.01871	1.00855	1.01515	1.01091	0.00413
2.73333	1.00898	0.986579	1.01964		0.999077	0.995395	0.990308	1.01055	1.01051	0.00316
2.76667	0.997345	0.999181	1.01047		1.01201	1.02587	1.00787	1.02362	1.01081	0.00202
2.8	1.0024	0.998664	1.02258		1.00734	1.01643	1.01078	1.01536	1.01139	0.00534
2.83333	1.00825	1.00519	1.01701		1.00848		1.00904	1.01687	1.00694	0.00367
2.86667	1.00866	0.990317	1.00465	1.02085	1.00509	1.04079	1.00308	1.0177	1.00923	0.00473
2.9	1.00095	1.00231	1.0017	1.0211	0.999351	1.02478	0.997261	1.00803	1.01119	0.00416
2.93333	0.999284	0.98447	1.0106	1.01611	1.00057	1.02026	1.01983	1.0227	1.01238	0.00521
2.96667	1.00736	0.987369	1.01121	1.02321	1.00928	1.02272	1.00747	1.02086	1.00891	0.00274
3	1.01064	0.994333	1.01585	1.00305	1.00437	1.04206	1.00605	1.0227	1.00673	0.00626
3.03333	1.00772	1.00196	1.01006		1.00924	1.02086	0.998947	1.0136	1.0058	0.00439
3.06667	1.01674	0.99295	1.02063		0.995782	1.02539	0.981478	1.01415	1.00802	0.00616
3.1	1.00524	1.00457	1.01498	0.991711	1.00242	1.02853	0.989864	1.00904	1.00314	0.00589
3.13333	1.01402	1.00584	1.00322	1.02109	0.998429	1.04148	0.98595	0.994091	1.00497	0.00579
3.16667	1.0073	0.99943	1.00463		1.01061	1.02715	0.975617	0.997221	1.00891	0.00211
3.2	1.00534	0.997983	1.00983	1.01397	0.997651	1.03333	0.975591	1.00604	1.008	0.00355
3.23333	1.01299	1.00195	1.01104	1.01207	1.0079	1.0154	0.99809	1.01188	1.01287	0.00458
3.26667	1.0154	0.986178	1.00594	1.0155	1.00893	1.01814	1.00516	1.00876	1.01275	0.00346
3.3	1.01923	0.992914	1.0153	1.01583	0.997715	1.0284	1.00629	1.0273	1.01104	0.00341
3.33333	1.01402	1.0013	1.01147	1.01845	1.003	1.02082	1.00388	1.02905	1.00711	0.00635
3.36667	1.01243	0.999283	1.00553	1.01097	1.00791	1.02967	1.00338	1.01915	1.0089	0.00477
3.4	1.02031	0.988445	1.00858	1.01059	0.97183	1.02461	1.01731	1.01518	1.00261	0.0073
3.43333	1.01819	0.99738	1.00276	1.00051	1.01478	1.0343	1.01066	0.992619	1.00764	0.0066
3.46667	1.0176	0.984279	1.01004	1.01628	0.968294		1.01873	1.00302	0.99662	0.00988
3.5	1.01233	0.965284	1.01372	1.0142	1.0075	1.0257	1.02105	1.00135	0.98455	0.01865
3.53333	1.00215	0.967598	1.01874	1.02078	1.0106	0.944832	1.02037	0.987853	0.99975	0.00869
3.56667	1.01027	0.963758	1.0051	1.01848	1.00561	0.861349	1.01757	0.994275	0.99072	0.0097
3.6	0.981916	0.953658	0.998224	1.01321	0.99917	1.03653	1.01543	0.999872	0.98137	0.01375
3.63333	0.988877	0.950753	1.00906	0.950389	1.00797	1.02421	1.00716	0.987326	0.97767	0.01403
3.66667	0.986284	0.936159	1.00557	1.01742	1.01356	0.910483	1.00495	0.976527	0.98339	0.01389
3.7	0.961519	0.952869	1.00943	1.01112	0.996129	0.897391	1.01262	0.980279	0.96569	0.0128
3.73333	0.966602	0.896104	0.990267	1.00577	0.989185	1.02212	1.01189	0.985204	0.9788	0.00937
3.76667	0.969762	0.929047	0.989323	0.998738	0.972723	0.893603	0.992644	0.979679	0.96773	0.0085
3.8	0.962718	0.930686	0.985239	1.00104	0.964921	1.01797	0.987951	0.979883	0.96969	0.00893
3.83333	0.973364	0.934804	0.976512	0.932648	0.957364	0.997999	0.980774	0.988404	0.97256	0.00937
3.86667	0.977176	0.927852	0.965664	0.987797	0.944267	1.00876	0.965252	0.980725	0.94883	0.01437
3.9	0.964654	0.922234	0.974735	0.99693	0.960929	1.01151	0.969446	0.980077	0.95249	0.00996
3.93333	0.961834	0.920509	0.962616	0.996538	0.944704	0.865218	0.958484	0.980757	0.96797	0.00908
3.96667	0.959791	0.922394	0.96032	0.913127	0.940823	1.00091	0.948078	0.974497	0.95744	0.00733
4	0.973592	0.933278	0.971714	0.996876	0.939994	1.00096	0.945975	0.981357	0.96248	0.01077
4.03333	0.967297	0.93239	0.9552	0.956985	0.931979	0.987153	0.946134	0.982365	0.9574	0.00986
4.06667	0.982315	0.912025	0.961306	1.00527	0.934743	0.981292	0.944174	0.978675	0.95922	0.01005
4.1	0.960209	0.922996	0.951669	1.00002	0.928102	0.981785	0.935457	0.978946	0.93544	0.01787
4.13333	0.957762	0.920669	0.957079	0.993877	0.936425	0.993571	0.932098	0.982248	0.95685	0.01233
4.16667	0.973351	0.910851	0.940936	0.826472	0.941751	0.98494	0.931861	0.973368	0.95752	0.01036
4.2	0.954626	0.901329	0.952933	0.99435	0.931682	1.00615	0.935112	0.978601	0.94885	0.01113
4.23333	0.974458	0.916991	0.955847	0.992739	0.930696	0.987606	0.92716	0.974686	0.91054	0.02396
4.26667	0.960583	0.90574	0.964574	0.982357	0.927986		0.923951	0.976766	0.90996	0.0255
4.3	0.959004	0.902002	0.958921	0.79137	0.932183	0.826962	0.930226	0.983681	0.93452	0.01772
4.33333	0.97061	0.913831	0.96711	0.790427	0.925209	0.810969	0.920803	0.980712	0.92137	0.01743
4.36667	0.971014	0.909815	0.965408	0.983179	0.933032	0.827161	0.925512	0.961016	0.93182	0.01845
4.4	0.958232	0.888404	0.937696	0.815197	0.930404	0.954192	0.922189	0.964618	0.94901	0.00966
4.43333	0.97994	0.895431	0.950755	0.98245	0.944434	0.823644	0.922666	0.955248	0.95074	0.01175
4.46667	0.957069	0.908089	0.944358	0.993305	0.944589	0.972423	0.9187	0.953543	0.93056	0.01739
4.5	0.977783	0.902448	0.941463	1.00361	0.939187	0.975139	0.918237	0.948085	0.94924	0.01061
4.53333	0.968523	0.90912	0.951277	0.822122	0.944428	0.975288	0.919874	0.953838	0.95282	0.00972
4.56667	0.977548	0.894649	0.938365	0.986794	0.94579	0.968223	0.925562	0.956982	0.92993	0.0199
4.6	0.968478	0.903905	0.948563	0.99321	0.952209	0.975326	0.930652	0.95024	0.92698	0.02053
4.63333	0.970702	0.903059	0.960793	0.802438	0.940855	0.973216	0.934825	0.953582	0.93088	0.01821
4.66667	0.977163	0.897952	0.954603	0.803175	0.93686	0.989254	0.919115	0.937709	0.94766	0.00887
4.7	0.97054	0.895078	0.939898	0.821757	0.957443	0.980579	0.927766	0.954016	0.95326	0.01067
4.73333	0.9732	0.901126	0.94768	0.960998	0.948735	0.974081	0.921754	0.953716	0.92374	0.01987
4.76667	0.976377	0.892424	0.948876	0.983412	0.956961	0.975402	0.928901	0.96372	0.94848	0.00894
4.8	0.967032	0.8926	0.943762	0.796657	0.940834	0.963664	0.935446	0.949904	0.94533	0.00939
4.83333	0.967176	0.897106	0.953074	0.973582	0.948589	0.969608	0.928742	0.949963	0.92423	0.01986
4.86667	0.954827	0.900945	0.952111	0.985233	0.937011	0.970228	0.922449	0.939846	0.93902	0.01089
4.9	0.954173	0.900367	0.941348	0.796718	0.939367	0.978933	0.930344	0.952578	0.94617	0.01055
4.93333	0.972125	0.896423	0.933659	0.979775	0.939602		0.929656	0.92187	0.94359	0.01052
4.96667	0.959499	0.891455	0.957494	0.982779	0.938258	0.978372	0.927742	0.933736	0.92748	0.01757
5	0.961143	0.893814	0.953026		0.926098	0.978942	0.936027	0.956101	0.94915	0.01031
5.03333	0.975384	0.897676	0.948806	0.819061	0.930093	0.957534	0.932965	0.958348	0.94728	0.01092
5.06667	0.96948	0.897976	0.958772	0.964743	0.92699	0.991416	0.931782	0.952	0.94498	0.0115
5.1	0.976881	0.898159	0.964868	0.971857	0.930927		0.928086	0.960217	0.94649	0.00792
5.13333	0.959352	0.884929	0.964586	0.976212	0.921952	0.979733	0.923303	0.949777	0.92868	0.01732
5.16667	0.957107	0.904305	0.965486	0.952016	0.938572	0.973939	0.927307	0.953148	0.94614	0.00926
5.2	0.954287	0.896805	0.968141	0.95945	0.93521	0.82062	0.937445	0.957513	0.91231	0.02099
5.23333	0.956726	0.889728	0.959103	0.967849	0.928908	0.963321	0.941353	0.96212	0.94703	0.00884
5.26667	0.960588	0.896327	0.963708	0.826321	0.930656	0.823283	0.925003	0.972557	0.91115	0.02139
5.3	0.950344	0.900064	0.973715	0.962915	0.935683	0.95603	0.92656	0.97091	0.94364	0.00901
5.33333	0.96496	0.90788	0.963947	0.812013	0.933218	0.825861	0.923337	0.957973	0.92649	0.01682
5.36667	0.956671	0.899105	0.965102	0.964172	0.928474	0.956343	0.91632	0.962946	0.94572	0.00965
5.4	0.946952	0.893414	0.943714	0.824054	0.9398	0.971002	0.929388	0.963598	0.93273	0.01381
5.43333	0.965554	0.898012	0.961826	0.979032	0.928317	0.967151	0.92613	0.939756	0.92071	0.01738
5.46667	0.952646	0.893341	0.964535	0.862601	0.924386	0.948387	0.933367	0.982544	0.94999	0.01089
5.5	0.957966	0.899492	0.968167	0.871746	0.931551	0.83423	0.929217	0.973297	0.94484	0.00931
5.53333	0.947082	0.888544	0.965303	0.981077	0.936489	0.971829	0.933029	0.976557	0.93969	0.00901
5.56667	0.95469	0.903772	0.956074	0.923202	0.937644	0.980718	0.928334	0.974253	0.93808	0.01014
5.6	0.951545	0.906587	0.945731	0.918457	0.93235	0.974944	0.91666	0.971272	0.93663	0.01085
5.63333	0.945758	0.905829	0.958392	0.905583	0.920694	0.970552	0.920671	0.977168	0.9444	0.01042
5.66667	0.948838	0.893633	0.950584	0.914586	0.926911	0.982377	0.908748	0.967359	0.94495	0.0076
5.7	0.954131	0.892177	0.939818	0.976579	0.93467	0.973	0.917055	0.967767	0.92231	0.01748
5.73333	0.952364	0.909122	0.936038	0.972126	0.937649	0.967494	0.926569	0.958213	0.93746	0.00759
5.76667	0.940393	0.897078	0.949932	0.816425	0.929523	0.972832	0.911755	0.960571	0.92216	0.01525
5.8	0.945411	0.895087	0.936075	0.963929	0.935423	0.938627	0.925076	0.960026	0.94081	0.0083
5.83333	0.929912	0.910537	0.947809	0.826719	0.93119	0.946461	0.914268	0.970365	0.94764	0.0079
5.86667	0.931905	0.900388	0.949988	0.969845	0.927199	0.966995	0.926954	0.953213	0.93589	0.0068
5.9	0.941737	0.911414	0.955411	0.975329	0.925591	0.969877	0.938176	0.963603	0.94467	0.00652
5.93333	0.934871	0.9164	0.947116	0.923867	0.929907	0.965571	0.912146	0.957214	0.94614	0.00694
5.96667	0.940998	0.915155	0.940639	0.972872	0.929444	0.962775	0.940463	0.955043	0.94462	0.00841
6	0.936626	0.924014	0.9427	0.977877	0.928967	0.971565	0.93519	0.952199	0.94438	0.00733
6.03333	0.934875	0.910653	0.92455	0.981833	0.935685	0.962823	0.93981	0.966692	0.94477	0.00674
6.06667	0.949425	0.914865	0.956238	0.971345	0.919912	0.961843	0.92822	0.953176	0.94338	0.00653
6.1	0.935972	0.937847	0.934784	0.985989	0.927922	0.940433	0.935262	0.959949	0.95199	0.00745
6.13333	0.938865	0.918247	0.94014	0.974607	0.923915	0.958697	0.938462	0.954091	0.9493	0.0046
6.16667	0.948905	0.922054	0.949856	0.976362	0.9306	0.983594	0.943596	0.960922	0.94659	0.0056
6.2	0.938261	0.937967	0.945075	0.973055	0.941403	0.96341	0.941033	0.954163	0.95433	0.0066
6.23333	0.945544	0.924533	0.944123	0.9702	0.93172	0.96194	0.936186	0.958458	0.93024	0.01824
6.26667	0.950541	0.92287	0.941717	0.980062	0.94649	0.972573	0.951623	0.96878	0.94854	0.00617
6.3	0.951337	0.921269	0.935858	0.976649	0.93089	0.960924	0.81031	0.95467	0.94657	0.00646
6.33333	0.943634	0.929523	0.945488	0.974059	0.939089	0.976196	0.933434	0.946929	0.94804	0.00697
6.36667	0.943485	0.923351	0.942783	0.978495	0.945775	0.958823	0.923897	0.955943	0.94756	0.00486
6.4	0.940781	0.934751	0.954241	0.976029	0.948077	0.972377	0.915734	0.942355	0.9487	0.00866
6.43333	0.930389	0.950364	0.946295	0.974914	0.945405	0.951781	0.931887	0.949467	0.94591	0.00791
6.46667	0.951003	0.920087	0.948183	0.985061	0.945854	0.974353	0.911758	0.953262	0.9501	0.00749
6.5	0.933769	0.928382	0.939669	0.982509	0.938139	0.964478	0.915677	0.964676	0.95022	0.008
6.53333	0.943231	0.932786	0.948874	0.992226	0.940199	0.96487	0.92398	0.954667	0.94278	0.00763
6.56667	0.943424	0.938706	0.946732	0.995972	0.937802	0.96454	0.9199	0.954685	0.9404	0.00817
6.6	0.938193	0.928571	0.939934	0.989739	0.929045	0.955499	0.921105	0.940146	0.9387	0.00802
6.63333	0.93353	0.933405	0.938667	0.988211	0.920267	0.94979	0.911918	0.947387	0.94638	0.00736
6.66667	0.936157	0.911636	0.932463	0.98613	0.918155	0.950449	0.934643	0.939938	0.94316	0.00847
6.7	0.94478	0.934712	0.938919	0.992886	0.931802	0.950761	0.925846	0.951345	0.9382	0.00695
6.73333	0.923402	0.925922	0.941371	0.984748	0.929914	0.968192	0.917364	0.954341	0.94027	0.00706
6.76667	0.931886	0.923137	0.940382	0.97593	0.930655	0.938638	0.911445	0.953556	0.93926	0.00726
6.8	0.924612	0.918931	0.938304	0.980211	0.934612	0.955488	0.925704	0.94426	0.93911	0.01004
6.83333	0.928271	0.913835	0.930162	0.971051	0.936406	0.958842	0.919134	0.956356	0.94009	0.0074
6.86667	0.922926	0.902895	0.928477	0.986415	0.939665	0.971376	0.914177	0.946943	0.94093	0.00845
6.9	0.935346	0.911292	0.930902	0.978587	0.94208	0.957094	0.921546	0.943907	0.94505	0.01064
6.93333	0.927246	0.909497	0.924546	0.985397	0.940834	0.959167	0.929314	0.951472	0.94441	0.01266
6.96667	0.93004	0.915057	0.930404	1.00634	0.957014	0.963714	0.918026	0.93982	0.94466	0.01295
7	0.932118	0.903982	0.9245	1.01991	0.949712	0.964706	0.919155	0.941203	0.94781	0.01059
7.03333	0.92466	0.897504	0.93051	1.02177	0.943692	0.96601	0.932731	0.94037	0.94773	0.00974
7.06667	0.93514	0.908624	0.930131	1.01099	0.949604	0.960417	0.937417	0.950189	0.94582	0.00955
7.1	0.927316	0.912399	0.927106	1.00147	0.948988	0.964419	0.945351	0.954768	0.94613	0.0103
7.13333	0.932201	0.90522	0.929226	0.994346	0.953073	0.967124	0.950239	0.935116	0.94709	0.00874
7.16667	0.933943	0.902802	0.923968	0.998683	0.962922	0.96376	0.94514	0.937822	0.94503	0.00958
7.2	0.937541	0.923516	0.925963	0.999943	0.959018	0.94753	0.951335	0.931859	0.94138	0.01483
7.23333	0.935426	0.919265	0.919656	1.00147	0.957831	0.956665	0.939921	0.930037	0.94656	0.0095
7.26667	0.943178	0.860222	0.931718	1.00913	0.961511	0.962255	0.932546	0.930456	0.94638	0.0094
7.3	0.932044	0.926159	0.921381	1.00582	0.957834	0.95179	0.938705	0.93878	0.94597	0.0092
7.33333	0.916327	0.921791	0.926296	0.996429	0.968854	0.950918	0.946115	0.944335	0.94642	0.00959
7.36667	0.928282	0.918276	0.92283	1.00106	0.952142	0.952974	0.94601	0.946215	0.94361	0.00954
7.4	0.934145	0.907916	0.931416	0.998997	0.961662	0.958622	0.944142	0.934432	0.93628	0.00702
7.43333	0.933159	0.925769	0.90332	0.995706	0.957688	0.9533	0.942631	0.93729	0.94221	0.00588
7.46667	0.935432	0.913016	0.926231	0.909911	0.966563	0.957525	0.943138	0.938392	0.94341	0.00556
7.5	0.925696	0.926763	0.922849	0.954041	0.969654	0.954205	0.945037	0.939457	0.94988	0.00736
7.53333	0.936431	0.927349	0.929175	0.957835	0.971541	0.953456	0.936821	0.934644	0.94648	0.00716
7.56667	0.940103	0.924322	0.925198	0.973875	0.981154	0.959458	0.944335	0.950572	0.94276	0.01077
7.6	0.935912	0.917701	0.924997	0.976345	0.96471	0.962076	0.944571	0.9455	0.93949	0.00973
7.63333	0.931523	0.90162	0.912018	0.987026	0.97573	0.963876	0.942999	0.927295	0.94119	0.00875
7.66667	0.915492	0.907293	0.919639	0.985237	0.968557	0.955326	0.932742	0.931656	0.9387	0.0074
7.7	0.934692	0.89935	0.923621	0.980278	0.957005	0.960206	0.934508	0.939879	0.93693	0.00881
7.73333	0.928965	0.918149	0.923986	0.981374	0.941981	0.955048	0.923442	0.936624	0.93485	0.00875
7.76667	0.954388	0.896207	0.92035	0.977282	0.948003	0.947427	0.924727	0.927057	0.93584	0.00718
7.8	0.930485	0.894851	0.924799	0.975344	0.947541	0.955469	0.916327	0.934004	0.93277	0.00822
7.83333	0.926244	0.914802	0.923661	0.976981	0.933442	0.954987	0.924502	0.932126	0.93192	0.00617
7.86667	0.93047	0.902975	0.922556	0.970342	0.938339	0.960067	0.908711	0.928689	0.93187	0.00729
7.9	0.923686	0.908356	0.923544	0.959198	0.933128	0.954593	0.918674	0.934205	0.93287	0.00677
7.93333	0.924124	0.917254	0.922258	0.962001	0.93755	0.954497	0.898514	0.938725	0.92967	0.00866
7.96667	0.93397	0.900249	0.927113	0.962141	0.944898	0.944568	0.914795	0.935226	0.93087	0.00757
8	0.94022	0.887778	0.921006	0.964185	0.938566	0.951466	0.907182	0.92698	0.92849	0.00675
8.03333	0.936905	0.900877	0.921967	0.959844	0.938393	0.955437	0.904524	0.929036	0.92602	0.0062
8.06667	0.928021	0.901026	0.917208	0.951717	0.940724	0.952727	0.908636	0.927891	0.92988	0.00545
8.1	0.921589	0.905563	0.911067	0.9505	0.935129	0.939432	0.90507	0.939794	0.92502	0.00617
8.13333	0.923264	0.916166	0.920827	0.949659	0.934599	0.948331	0.90723	0.938996	0.92864	0.0085
8.16667	0.917116	0.902251	0.923196	0.955869	0.928798	0.923087	0.907891	0.941969	0.92779	0.00862
8.2	0.916398	0.912635	0.918418	0.959628	0.919093	0.959414	0.894948	0.948626	0.92529	0.00605
8.23333	0.913004	0.899735	0.927294	0.968439	0.90319	0.953698	0.917747	0.939205	0.92462	0.00564
8.26667	0.912986	0.903894	0.917914	0.957925	0.926365	0.937982	0.914067	0.931224	0.92771	0.00699
8.3	0.919017	0.902997	0.92839	0.958038	0.924574	0.92729	0.912637	0.924045	0.92389	0.00757
8.33333	0.917516	0.909923	0.924378	0.967554	0.919757	0.944071	0.908202	0.930241	0.92075	0.00659
8.36667	0.907305	0.897034	0.914756	0.952913	0.918625	0.954873	0.910562	0.935014	0.92485	0.00661
8.4	0.92865	0.889523	0.924711	0.94238	0.914263	0.942722	0.901185	0.922573	0.92299	0.00558
8.43333	0.921116	0.894859	0.922058	0.954464	0.934109	0.938164	0.90552	0.928504	0.92511	0.00706
8.46667	0.927869	0.898847	0.91569	0.950671	0.93173	0.926351	0.907946	0.924844	0.92485	0.00746
8.5	0.929562	0.900936	0.922846	0.953894	0.934375	0.941436	0.89343	0.92441	0.92715	0.00789
8.53333	0.923614	0.901267	0.920572	0.953677	0.934525	0.941749	0.889558	0.933874	0.92713	0.00667
8.56667	0.938682	0.887048	0.924551	0.954316	0.928274	0.946093	0.9032	0.935035	0.92871	0.00653
8.6	0.934322	0.903441	0.921409	0.953063	0.926488	0.938273	0.898243	0.941812	0.9296	0.00869
8.63333	0.939918	0.896784	0.923464	0.957684	0.928056	0.939843	0.91305	0.930858	0.92622	0.00794
8.66667	0.958784	0.888862	0.920501	0.962536	0.923498	0.945638	0.916333	0.920632	0.93038	0.00928
8.7	0.94806	0.893419	0.916002	0.958013	0.932738	0.940896	0.903325	0.917311	0.93264	0.00954
8.73333	0.964731	0.897548	0.919016	0.960118	0.927994	0.947384	0.894985	0.93128	0.93556	0.00873
8.76667	0.974515	0.895819	0.921268	0.967621	0.929085	0.939066	0.910293	0.923491	0.93353	0.01047
8.8	0.967045	0.905399	0.910351	0.964705	0.934264	0.955963	0.914328	0.932458	0.93307	0.01028
8.83333	0.966763	0.886192	0.916281	0.969346	0.927069	0.959283	0.910929	0.932374	0.9319	0.01014
8.86667	0.979125	0.897984	0.909856	0.964794	0.928233	0.949324	0.906298	0.928934	0.93461	0.00949
8.9	0.966719	0.893028	0.920395	0.966252	0.918223	0.961213	0.908428	0.920944	0.93143	0.01054
8.93333	0.962498	0.892815	0.928934	0.968426	0.92927	0.958952	0.908674	0.927278	0.93128	0.01239
8.96667	0.963994	0.89599	0.924325	0.979325	0.918263	0.949961	0.902616	0.916967	0.93435	0.01049
9	0.965309	0.874929	0.929672	0.974603	0.914708	0.96097	0.896298	0.933785	0.93294	0.01087
9.03333	0.978277	0.890192	0.926523	0.972157	0.923867	0.945182	0.911707	0.926916	0.92965	0.01285
9.06667	0.968778	0.88625	0.921802	0.973268	0.917834	0.951106	0.904641	0.939849	0.92921	0.00911
9.1	0.976852	0.862169	0.920436	0.96009	0.930407	0.95535	0.901474	0.930452	0.92786	0.00821
9.13333	0.955456	0.883725	0.920956	0.95734	0.923317	0.948471	0.90597	0.938459	0.92899	0.00816
9.16667	0.953164	0.883844	0.921712	0.952851	0.917149	0.943166	0.916258	0.934748	0.93046	0.00828
9.2	0.9491	0.891424	0.920742	0.967218	0.922334	0.934618	0.912223	0.934295	0.93184	0.00873
9.23333	0.943407	0.889271	0.922566	0.967253	0.928347	0.944404	0.912341	0.936093	0.93165	0.0079
9.26667	0.941373	0.887239	0.930678	0.969446	0.930948	0.94512	0.9092	0.940697	0.93026	0.00931
9.3	0.94446	0.897629	0.923965	0.962487	0.928471	0.947409	0.904362	0.944381	0.92681	0.00917
9.33333	0.942986	0.888094	0.938141	0.962709	0.922204	0.942723	0.895575	0.949674	0.92961	0.00906
9.36667	0.94189	0.880993	0.930789	0.96712	0.919911	0.931138	0.903739	0.938878	0.92938	0.00843
9.4	0.935498	0.89053	0.926094	0.957334	0.921387	0.962514	0.899571	0.94392	0.92803	0.00902
9.43333	0.935224	0.89112	0.921794	0.963336	0.927424	0.94898	0.903398	0.94377	0.92905	0.01034
9.46667	0.926519	0.883743	0.935772	0.959586	0.935784	0.94156	0.896291	0.944976	0.9308	0.00909
9.5	0.941474	0.871403	0.923792	0.963378	0.953725	0.944022	0.907545	0.927044	0.92819	0.01041
9.53333	0.930665	0.885775	0.925935	0.963666	0.953026	0.943539	0.903398	0.940392	0.93147	0.00952
9.56667	0.925214	0.882668	0.930515	0.965558	0.937428	0.951501	0.887411	0.945207	0.93372	0.00989
9.6	0.934891	0.886428	0.942959	0.958123	0.940004	0.95268	0.892586	0.944103	0.93145	0.01001
9.63333	0.926978	0.890586	0.937481	0.961966	0.956384	0.947327	0.893746	0.95526	0.93219	0.00931
9.66667	0.919613	0.88206	0.942739	0.967457	0.945305	0.954348	0.902297	0.937759	0.93153	0.01128
9.7	0.933323	0.890011	0.940733	0.962995	0.947092	0.940435	0.893759	0.949163	0.93907	0.00878
9.73333	0.94485	0.876743	0.930216	0.968552	0.9443	0.955888	0.890125	0.941602	0.92107	0.01532
9.76667	0.929759	0.89171	0.951981	0.96146	0.938478	0.951096		0.948972	0.92192	0.01512
9.8	0.934296	0.883085	0.936542	0.846435	0.944005	0.956328		0.946806	0.93594	0.01108
9.83333	0.945717	0.89092	0.937658	0.844341	0.932976	0.950069		0.951745	0.93506	0.0119
9.86667	0.937253	0.883192	0.93801	0.974242	0.917106	0.957798		0.943963	0.93281	0.00906
9.9	0.952014	0.871952	0.942909	0.967151	0.917758	0.948621		0.94501	0.94136	0.01028
9.93333	0.949128	0.88453	0.947168	0.942067	0.917296	0.948793		0.940674	0.92567	0.01067
9.96667	0.968296	0.888244	0.950245	0.958865	0.923004	0.950791		0.950108	0.93188	0.00922
10	0.949389	0.879974	0.948998	0.897951	0.915409	0.948754		0.939207	0.93378	0.00887
10.0333	0.959977	0.888786	0.951203	0.938924	0.910933	0.93949		0.933875	0.92466	0.01026
10.0667	0.95508	0.887878	0.95454	0.936121	0.923506	0.947765		0.931537	0.93192	0.01001
10.1	0.967319	0.885346	0.932579	0.90359	0.909401	0.938751		0.935641	0.93156	0.00724
10.1333	0.955364	0.881919	0.941783	0.933296	0.914273	0.958469		0.938307	0.93111	0.00698
10.1667	0.94488	0.892004	0.942381	0.937885	0.92145	0.943868		0.938425	0.92117	0.0099
10.2	0.943193	0.892773	0.94777	0.934596	0.929699	0.942232		0.927539	0.92699	0.00907
10.2333	0.943334	0.874338	0.932279	0.902519	0.919973	0.951982		0.92375	0.92966	0.00977
10.2667	0.950993	0.879066	0.927317	0.939689	0.916416	0.944149		0.931265	0.92673	0.00845
10.3	0.940425	0.873771	0.945507	0.93216	0.925013	0.945769		0.944994	0.92956	0.00831
10.3333	0.940686	0.877699	0.933033	0.942838	0.927241	0.929087		0.936533	0.93257	0.00919
10.3667	0.940777	0.884985	0.949299	0.942807	0.91811	0.938965		0.932001	0.93158	0.0095
10.4	0.937678	0.878952	0.941965	0.934858	0.938853	0.952489		0.943223	0.92741	0.00934
10.4333	0.937661	0.885374	0.942494	0.939765		0.934169		0.950036	0.92624	0.00975
10.4667	0.932422	0.881204	0.942637	0.936577		0.935791		0.935808	0.92644	0.01049
10.5	0.928449	0.879144	0.942321	0.928316		0.941423		0.937775	0.92924	0.01144
10.5333	0.934291	0.874204	0.93543	0.940694		0.938128		0.935894	0.92638	0.00846
10.5667	0.932677	0.87408	0.944842	0.952695		0.936049		0.935073	0.92799	0.00981
10.6	0.926815	0.885192	0.939476	0.939109		0.935259		0.932448	0.93179	0.0088
10.6333	0.931812	0.880241	0.930438	0.944289		0.942381		0.938766	0.9298	0.00846
10.6667	0.923161	0.894505	0.952051	0.95186		0.930587		0.938568	0.93321	0.01035
10.7	0.930061	0.889398	0.94127	0.945115		0.94193		0.931043	0.92986	0.01071
10.7333	0.939007	0.882992	0.954838	0.941682		0.94314		0.937618	0.92699	0.00742
10.7667	0.922461	0.880003	0.946581	0.947048		0.946785		0.93628	0.93306	0.00849
10.8	0.927026	0.891865	0.944426	0.934551		0.933927		0.930121	0.92603	0.01067
10.8333	0.930491	0.893216	0.948164	0.942108		0.949037		0.935325	0.9263	0.01007
10.8667	0.904634	0.882996	0.941873	0.946093		0.945175		0.935435	0.92465	0.0104
10.9	0.910389	0.88327	0.946219	0.943155		0.939908		0.934833	0.92831	0.0078
10.9333	0.893406	0.892215	0.946173	0.947031		0.93977		0.929315	0.92953	0.01023
10.9667	0.924155	0.894632	0.945781	0.945573		0.924058		0.935665	0.92824	0.00815
11	0.911019	0.888279	0.943722	0.954321		0.9456		0.934267	0.93508	0.01093
11.0333	0.908155	0.904496	0.94272	0.951904		0.941996		0.920196	0.93104	0.00924
11.0667	0.918531	0.89259	0.944145	0.966832		0.955304		0.933062	0.93441	0.01021
11.1	0.916833	0.902578	0.926464	0.957218		0.959228		0.923898	0.93199	0.00901
11.1333	0.903224	0.904986	0.941235	0.965112		0.950046		0.94188	0.93588	0.00961
11.1667	0.909267	0.903085	0.937838	0.960411		0.947429		0.933913	0.93293	0.01034
11.2	0.908104	0.909465	0.939197	0.968354		0.950792		0.939357	0.93421	0.01037
11.2333	0.90176	0.910814	0.943613	0.971731		0.942599		0.927039	0.93081	0.00862
11.2667	0.906637	0.906763	0.939784	0.973031		0.947172		0.931872	0.93246	0.0095
11.3	0.907848	0.90607	0.931045	0.961234		0.942214		0.936443	0.93165	0.01071
11.3333	0.903153	0.912801	0.935873	0.967656		0.946511		0.928739	0.92805	0.00863
11.3667	0.901252	0.899836	0.939312	0.967036		0.939264		0.943205	0.93342	0.00888
11.4	0.904802	0.905429	0.924942	0.959763		0.939753		0.933594	0.92804	0.00838
11.4333	0.903028	0.920812	0.940496	0.967229		0.94107		0.927891	0.93391	0.01005
11.4667	0.907089	0.910132	0.931211	0.962664		0.936898		0.920254	0.92638	0.0054
11.5	0.901532	0.905929	0.944295	0.962892		0.948235		0.94056	0.92593	0.00788
11.5333	0.915265	0.90742	0.930965	0.944581		0.932668		0.927384	0.92476	0.0086
11.5667	0.901097	0.916874	0.920065	0.954137		0.943231		0.920183	0.92013	0.00865
11.6	0.900771	0.899952	0.929979	0.949428		0.944549		0.923882	0.92475	0.00813
11.6333	0.897115	0.894839	0.927095	0.952688	0.902995	0.943952		0.922249	0.92564	0.00739
11.6667	0.89408	0.918568	0.934584	0.964577	0.914346	0.925178		0.921934	0.92536	0.0074
11.7	0.900742	0.904132	0.931769	0.957549	0.924757	0.937834		0.922706	0.9277	0.00763
11.7333	0.902661	0.904269	0.925496	0.95768	0.921539	0.942006		0.923844	0.92452	0.0086
11.7667	0.906259	0.910418	0.917731	0.959332	0.929646	0.950586		0.919906	0.92686	0.00634
11.8	0.899456	0.897155	0.918134	0.95877	0.933353	0.94487		0.91993	0.92114	0.00794
11.8333	0.901821	0.915991	0.926899	0.954666	0.932512	0.936227		0.91987	0.92075	0.00629
11.8667	0.898094	0.902826	0.914049	0.956962	0.925805	0.939097		0.911122	0.92026	0.00734
11.9	0.901854	0.911077	0.9074	0.945879	0.923281	0.940002		0.915725	0.92054	0.00687
11.9333	0.890612	0.901991	0.933352	0.943465	0.917253	0.938089		0.917075	0.92526	0.00436
11.9667	0.896908	0.906192	0.915746	0.941998	0.916101	0.947288		0.919524	0.92574	0.00536
12	0.90152	0.928902	0.920639	0.935935	0.92889	0.933445		0.927488	0.92376	0.00516
12.0333	0.90746	0.913539	0.923263	0.945665	0.920763	0.942914		0.926608	0.92301	0.00642
12.0667	0.905189	0.916915	0.912816	0.940613	0.928138	0.941051		0.921591	0.9283	0.00578
12.1	0.897118	0.914725	0.922606	0.953014	0.9288	0.927752		0.917033	0.92632	0.00735
12.1333	0.907166	0.910354	0.933695	0.949066	0.937498	0.936678		0.923666	0.92767	0.00634
12.1667	0.904807	0.923979	0.9141	0.95507	0.942104	0.938494		0.905714	0.93116	0.00562
12.2	0.909721	0.909789	0.919957	0.953377	0.945417	0.929929		0.925533	0.92884	0.00717
12.2333	0.921703	0.919955	0.920217	0.956015	0.936944	0.944716		0.918556	0.93271	0.00725
12.2667	0.924452	0.912815	0.903097	0.959515	0.943416	0.935076		0.923474	0.92908	0.00752
12.3	0.931613	0.908751	0.923882	0.970115	0.93634	0.93679		0.921484	0.92724	0.00635
12.3333	0.920177	0.91437	0.903702	0.965404	0.93619	0.936811		0.926929	0.93472	0.00826
12.3667	0.910219	0.910602	0.920952	0.959694	0.926887	0.932228		0.930113	0.93516	0.00667
12.4	0.932619	0.90642	0.915412	0.973371	0.948449	0.932279		0.93451	0.93076	0.00666
12.4333	0.9343	0.915372	0.920465	0.970164	0.934752	0.939613		0.931472	0.93535	0.00847
12.4667	0.928638	0.901608	0.921406	0.959806	0.939003	0.931211		0.933682	0.93544	0.00469
12.5	0.935334	0.916487	0.897178	0.964953	0.937754	0.94662		0.949098	0.93197	0.00542
12.5333	0.942834	0.919678	0.927514	0.95793	0.937466	0.934173		0.92851	0.93431	0.00528
12.5667	0.937448	0.912204	0.915346	0.951192	0.941928	0.926986		0.93865	0.92998	0.0061
12.6	0.944457	0.917399	0.916393	0.955384	0.932435	0.936624		0.937475	0.93728	0.00546
12.6333	0.925615	0.912377	0.913787	0.95651	0.943366	0.922586		0.935632	0.93854	0.00649
12.6667	0.945266	0.916825	0.92432	0.960984	0.941288	0.939492		0.932774	0.93768	0.00788
12.7	0.947849	0.917206	0.925568	0.969658	0.932105	0.943767		0.933593	0.93879	0.00712
12.7333	0.957805	0.911393	0.920172	0.968235	0.928792	0.928909		0.948481	0.93793	0.00495
12.7667	0.956384	0.91916	0.92103	0.970018	0.941405	0.936312		0.927248	0.93928	0.00717
12.8	0.946226	0.927653	0.918796	0.959613	0.941278	0.936333		0.93563	0.93852	0.00609
12.8333	0.950716	0.918431	0.919174	0.970085	0.929752	0.935887		0.950919	0.93308	0.00765
12.8667	0.943924	0.926065	0.92221	0.970218	0.930581	0.942821		0.933807	0.93161	0.00668
12.9	0.9294	0.90775	0.909505	0.96483	0.932207	0.942883		0.945006	0.93689	0.00736
12.9333	0.940366	0.923837	0.910222	0.962921	0.918229	0.925196		0.940529	0.93495	0.00752
12.9667	0.94747	0.912657	0.920282	0.958971	0.918205	0.94316		0.957474	0.9346	0.00819
13	0.945917	0.924588	0.909474	0.970177	0.919943	0.934193		0.94036	0.93817	0.00796
13.0333	0.957658	0.91594	0.919928	0.970236	0.913879	0.930113		0.934447	0.93706	0.00671
13.0667	0.94252	0.930516	0.913977	0.979212	0.921036	0.937574		0.942362	0.93629	0.00752
13.1	0.953615	0.918407	0.922142	0.958788	0.91608	0.944975		0.945378	0.9381	0.00776
13.1333	0.944678	0.922672	0.906358	0.96358	0.922333	0.942523		0.951862	0.93252	0.00754
13.1667	0.949025	0.909371	0.917362	0.964165	0.931431	0.958739		0.936593	0.93239	0.00599
13.2	0.940118	0.905292	0.915876	0.961046	0.92213	0.95226		0.930932	0.93135	0.00628
13.2333	0.929954	0.913271	0.915216	0.945256	0.924076	0.952823		0.94611	0.93535	0.00823
13.2667	0.932594	0.907973	0.924853	0.947123	0.917362	0.95623		0.933335	0.9356	0.00714
13.3	0.955144	0.914822	0.905843	0.957504	0.918781	0.95457		0.940776	0.94147	0.00761
13.3333	0.947627	0.913201	0.910964	0.955333	0.929435	0.957059		0.935553	0.94091	0.00864
13.3667	0.946343	0.921388	0.92283	0.972339	0.925388	0.962439		0.939577	0.94135	0.00861
13.4	0.954824	0.922768	0.91603	0.966085	0.917831	0.969562		0.939255	0.93587	0.00991
13.4333	0.957067	0.930066	0.911944	0.967314	0.92559	0.969247		0.928258	0.94177	0.00884
13.4667	0.963082	0.908958	0.907897	0.963811	0.92115	0.962767		0.923448	0.93675	0.00809
13.5	0.962255	0.91224	0.915264	0.960825	0.939587	0.97042		0.931831	0.93825	0.00995
13.5333	0.960641	0.909432	0.915421	0.957438	0.937724	0.954765		0.921863	0.94414	0.00921
13.5667	0.952673	0.899961	0.908758	0.969753	0.940324	0.962706		0.933561	0.94468	0.01105
13.6	0.957277	0.918848	0.909261	0.977601	0.954365	0.95807		0.933548	0.94628	0.00882
13.6333	0.963966	0.908154	0.911097	0.976208	0.95694	0.971925		0.9245	0.94655	0.00809
13.6667	0.955652	0.914418	0.918185	0.96636	0.96772	0.96621		0.93541	0.94743	0.00923
13.7	0.953634	0.918907	0.916312	0.96994	0.967285	0.952967		0.946822	0.94903	0.01108
13.7333	0.958312	0.920544	0.911944	0.970482	0.972912	0.961047		0.936737	0.94911	0.00959
13.7667	0.968607	0.904066	0.919149	0.967027	0.986618	0.956767		0.940994	0.9481	0.00965
13.8	0.952529	0.917879	0.917972	0.964908	0.985657	0.964676		0.940137	0.94447	0.0114
13.8333	0.960836	0.914782	0.92172	0.971245	0.980729	0.95592		0.931436	0.94442	0.01142
13.8667	0.947317	0.913212	0.916245	0.971821	0.98916	0.956982		0.916552	0.94777	0.01099
13.9	0.948719	0.901315	0.919021	0.958926	0.992286	0.960344		0.930363	0.94195	0.01128
13.9333	0.937814	0.921184	0.914433	0.975438	0.993176	0.95879		0.933529	0.94529	0.01135
13.9667	0.939294	0.917526	0.908662	0.958916	0.99786	0.943958		0.927417	0.94291	0.01196
14	0.949602	0.909225	0.910416	0.953073	0.995729	0.960225		0.938732	0.94612	0.01328
14.0333	0.949195	0.904201	0.904113	0.950855	0.995754	0.953211		0.943008	0.9483	0.01257
14.0667	0.933496	0.907876	0.905111	0.965582	1.00652	0.953016		0.951277	0.94508	0.01269
14.1	0.939416	0.918201	0.915104	0.974547	1.00554	0.958805		0.926513	0.93719	0.01096
14.1333	0.926786	0.911635	0.91442	0.983602	0.99832	0.942235		0.938529	0.94655	0.01415
14.1667	0.914048	0.902476	0.919271	0.986683	0.959449	0.943188		0.935222	0.93336	0.01146
14.2	0.933095	0.902328	0.91095	0.996795	0.99578	0.948105		0.938786	0.92511	0.01151
14.2333	0.921863	0.903162	0.895704	0.984468	0.949831	0.946283		0.932177	0.94099	0.00769
14.2667	0.933752	0.90247	0.910976	0.874027	0.958502	0.947164		0.948876	0.93542	0.00778
14.3	0.937765	0.911371	0.915204	0.960183	0.957692	0.948659		0.956039	0.92325	0.01129
14.3333	0.918775	0.910203	0.912713	0.958019	0.949303	0.946878		0.952051	0.91877	0.00997
14.3667	0.925959	0.902106	0.910252	0.873948	0.942144	0.957851		0.950464	0.9338	0.00808
14.4	0.902543	0.900009	0.911808	0.881674	0.944235	0.950454		0.940647	0.93523	0.00922
14.4333	0.92156	0.898286	0.92077	0.961628	0.940934	0.947304		0.946125	0.93529	0.00946
14.4667	0.922555	0.891709	0.921076	0.953077	0.947801	0.959661		0.950748	0.93198	0.00798
14.5	0.918176	0.895372	0.917418	0.962944	0.94566	0.953942		0.953525	0.93271	0.00749
14.5333	0.92159	0.906214	0.905286	0.959404	0.941055	0.943365		0.946918	0.93488	0.00703
14.5667	0.918827	0.90873	0.917056	0.965683	0.935157	0.93529		0.948249	0.93587	0.0086
14.6	0.917542	0.913219	0.919388	0.96145	0.936146	0.947257		0.949137	0.93147	0.00889
14.6333	0.923736	0.908727	0.920248	0.975947	0.928963	0.953311		0.94015	0.93454	0.00848
14.6667	0.919186	0.896148	0.912599	0.962531	0.932455	0.947577		0.949796	0.93636	0.01022
14.7	0.919005	0.90277	0.92499	0.968858	0.930392	0.955962		0.939792	0.93633	0.01262
14.7333	0.910781	0.902229	0.91971	0.980092	0.950641	0.947002		0.944094	0.94437	0.01264
14.7667	0.904832	0.894117	0.919417	0.989986	0.95625	0.955127		0.9346	0.9418	0.01298
14.8	0.907601	0.905865	0.929086	1.00154	0.957536	0.954234		0.954694	0.94141	0.01234
14.8333	0.896873	0.91346	0.925716	1.00252	0.949634	0.955816		0.948609	0.94118	0.01171
14.8667	0.899676	0.914081	0.924517	0.996477	0.964641	0.942222		0.948235	0.93035	0.00757
14.9	0.895512	0.92242	0.922634	0.991848	0.957321	0.946476		0.952072	0.94394	0.01212
14.9333	0.904563	0.909175	0.921265	0.931869	0.960473	0.941064		0.944027	0.93975	0.01317
14.9667	0.902391	0.918284	0.919642	0.99392	0.966148	0.956125		0.951036	0.93875	0.01262
15	0.896276	0.915515	0.917015	0.998997	0.950626	0.934805		0.965037	0.94143	0.01304
15.0333	0.896193	0.910507	0.920344	0.995966	0.951468	0.94058		0.956169	0.94364	0.01377
15.0667	0.89672	0.917122	0.923218	1.00288	0.956999	0.937895		0.955202	0.93981	0.01425
15.1	0.896249	0.91964	0.909547	0.997717	0.964048	0.950287		0.96799	0.93903	0.01076
15.1333	0.882499	0.921079	0.916566	0.999038	0.967149	0.94883		0.943522	0.94498	0.01362
15.1667	0.895611	0.914704	0.924412	0.950895	0.971137	0.946745		0.96971	0.946	0.01182
15.2	0.892493	0.919815	0.916858	0.994214	0.972353	0.96203		0.957126	0.94978	0.01099
15.2333	0.899537	0.929968	0.919312	0.991364	0.963314	0.963382		0.955089	0.95124	0.01167
15.2667	0.915508	0.92932	0.925225	0.999653	0.967778	0.956337		0.954623	0.95349	0.00998
15.3	0.926121	0.9205	0.923456	1.00361	0.960915	0.949698		0.97438	0.95152	0.01025
15.3333	0.93086	0.934423	0.927149	0.997381	0.965299	0.944351		0.974979	0.95353	0.00887
15.3667	0.92383	0.933512	0.936407	1.00699	0.955848	0.951957		0.9521	0.94495	0.00866
15.4	0.929308	0.931795	0.935353	0.993723	0.966034	0.952994		0.965503	0.94651	0.00832
15.4333	0.933293	0.939188	0.926704	0.983103	0.953574	0.956704	0.903814	0.963214	0.94725	0.00722
15.4667	0.9452	0.931989	0.937009	0.985781	0.947061	0.953488	0.90622	0.965353	0.95373	0.00765
15.5	0.938701	0.92721	0.952293	0.977337	0.954397	0.955076	0.91234	0.960645	0.95249	0.00864
15.5333	0.956594	0.926851	0.936182	0.988642	0.964329	0.952596	0.93106	0.973559	0.95393	0.00811
15.5667	0.95535	0.923797	0.929464	0.995753	0.961108	0.94268	0.936454	0.975326	0.94832	0.00626
15.6	0.945816	0.925078	0.936137	0.997237	0.969253	0.949553	0.941134	0.967249	0.95275	0.008
15.6333	0.939811	0.925982	0.938286	0.976558	0.950929	0.94303	0.939082	0.972867	0.9348	0.00947
15.6667	0.943925	0.917653	0.943635	0.99651	0.960704	0.954413	0.942393	0.962755	0.93821	0.00814
15.7	0.9383	0.917319	0.92965	0.880202	0.957629	0.946528	0.942656	0.96613	0.93749	0.00961
15.7333	0.961688	0.922001	0.940338	0.88931	0.952404	0.950448	0.938973	0.950507	0.95148	0.00485
15.7667	0.949317	0.91721	0.942637	0.880758	0.94853	0.962163	0.936356	0.96293	0.95712	0.00699
15.8	0.949158	0.942036	0.938101	0.978755	0.955606	0.955949	0.935947	0.95632	0.9534	0.00498
15.8333	0.955736	0.92873	0.945191	0.996156	0.960542	0.968883	0.946786	0.954945	0.94948	0.0043
15.8667	0.957816	0.935999	0.936529	0.975572	0.960626	0.96154	0.941145	0.957941	0.94605	0.00592
15.9	0.963804	0.935768	0.940392		0.958851	0.960985	0.941697	0.944829	0.95073	0.00751
15.9333	0.954348	0.921935	0.937431		0.955475	0.969743	0.936348	0.947082	0.95313	0.0068
15.9667	0.970569	0.914027	0.942303		0.968777	0.963565	0.94281	0.953038	0.95132	0.00774
16	0.963524	0.920399	0.949009		0.971533	0.970238	0.942526	0.954675	0.95349	0.00698
16.0333	0.961709	0.915268	0.940558		0.976593	0.96896	0.944764	0.951404	0.95601	0.00715
16.0667	0.955012	0.916216	0.945001		0.972128	0.964992	0.959253	0.961839	0.95027	0.00708
16.1	0.97618	0.927728	0.939898		0.969452	0.975298	0.945071	0.958477	0.95231	0.00738
16.1333	0.950436	0.921823	0.938117		0.956285	0.976932	0.940578	0.967747	0.95278	0.00691
16.1667	0.95057	0.918132	0.95146		0.967329	0.978184	0.939976	0.960499	0.95031	0.00631
16.2	0.954119	0.922363	0.943451		0.968017	0.975512	0.94204	0.963985	0.95319	0.00751
16.2333	0.955009	0.931575	0.937698		0.950919	0.982324	0.940413	0.954217	0.95194	0.0075
16.2667	0.970053	0.916659	0.955346		0.953065	0.978362	0.943062	0.95579	0.95687	0.00628
16.3	0.953949	0.913024	0.955512		0.966306	0.973811	0.94206	0.958908	0.95257	0.00893
16.3333	0.973712	0.92965	0.954305		0.966035	0.974448	0.941641	0.958276	0.95648	0.00644
16.3667	0.961889	0.913423	0.946525		0.957091	0.98046	0.933192	0.975394	0.96177	0.00641
16.4	0.973855	0.934573	0.955462		0.962108	0.978464	0.935448	0.955456	0.95316	0.01342
16.4333	0.971445	0.938821	0.956016		0.969846	0.970921	0.941197	0.984119	0.96713	0.00835
16.4667	0.97569	0.936837	0.96317		0.969085	0.977774	0.878866	0.970665	0.95016	0.01104
16.5	0.978922	0.941467	0.954123	1.01267	0.971384	0.965235	0.938959	0.974278	0.94169	0.01926
16.5333	0.968708	0.933148	0.963077	0.883757	0.968365	0.979996	0.938163	0.966072	0.94296	0.01994
16.5667	0.969925	0.933414	0.949507	0.816117	0.968661	0.983731	0.931952	0.980223	0.963	0.00681
16.6	0.969272	0.943168	0.964851	0.808645	0.981523	0.971853	0.935408	0.968965	0.95962	0.00604
16.6333	0.954094	0.934877	0.959282	0.988214	0.97798	0.976421	0.939394	0.973766	0.96644	0.00753
16.6667	0.948745	0.938812	0.961678	0.980923	0.977126	0.957801	0.937307	0.974572	0.96292	0.00795
16.7	0.958275	0.948915	0.964268	0.991618	0.985192	0.987168	0.929262	0.96682	0.93775	0.02221
16.7333	0.959566	0.945389	0.948333	0.991047	0.987555	0.961177	0.927906	0.982361	0.96102	0.00727
16.7667	0.950202	0.937419	0.971167	0.788286	0.978601	0.970308	0.932699	0.973284	0.95993	0.00823
16.8	0.937263	0.938489	0.962167	0.987913	0.977322	0.974252	0.937283	0.973463	0.9603	0.00748
16.8333	0.950561	0.925972	0.975805	0.999822	0.964942	0.966303	0.934602	0.961421	0.94859	0.01151
16.8667	0.937607	0.928624	0.962888	0.986345	0.97452	0.969582	0.943569	0.97928	0.95823	0.00834
16.9	0.931808	0.918236	0.962135	0.892624	0.982037	0.981826	0.945552	0.974491	0.96176	0.01034
16.9333	0.929065	0.925137	0.967834	0.990063	0.973097	0.975679	0.941163	0.963818	0.95691	0.00944
16.9667	0.922336	0.916082	0.969533	0.98216	0.987181	0.982306	0.947941	0.986548	0.9587	0.00899
17	0.910397	0.929161	0.967915	0.973204	0.986781	0.977804	0.942024	0.968011	0.9666	0.00989
17.0333	0.926286	0.936549	0.970803	0.993015	0.994334	0.947194	0.942533	0.958889	0.9621	0.00783
17.0667	0.922344	0.936204	0.973661	0.9787	1.0097	0.982782	0.953071	0.976356	0.96443	0.00788
17.1	0.922909	0.94101	0.960912	0.979771	0.992585	0.975885	0.958702	0.965005	0.96876	0.00664
17.1333	0.925422	0.94142	0.967246	0.979108	0.995436	0.975668	0.957937	0.973163	0.96835	0.00721
17.1667	0.944404	0.941419	0.976898	0.986247	0.991204	0.969022	0.959322	0.981564	0.96585	0.00739
17.2	0.972443	0.93224	0.980224	0.986505	0.99361	0.964508	0.946797	0.970451	0.96877	0.00798
17.2333	0.968835	0.923049	0.962392	0.982338	0.981631	0.979818	0.948737	0.980012	0.97114	0.00761
17.2667	0.968022	0.939645	0.963878	0.986893	1.00652	0.956333	0.945119	0.983755	0.96801	0.00627
17.3	0.977904	0.931082	0.976135	0.983295	0.996647	0.975366	0.946206	0.982486	0.97727	0.00815
17.3333	0.988457	0.946282	0.965408	0.984279	0.969356	0.965529	0.940396	0.984332	0.97462	0.00832
17.3667	0.994018	0.943341	0.97885	0.985949	1.0063	0.970481	0.945018	0.994172	0.97196	0.00822
17.4	0.987071	0.933139	0.970931	0.987544	1.01282	0.96582	0.958881	0.980716	0.97555	0.00785
17.4333	0.975384	0.940958	0.960069	0.980255	1.01581	0.972993	0.948036	0.98217	0.97823	0.00942
17.4667	0.983645	0.953125	0.974607	0.986162	1.01832	0.973174	0.945584	0.96981	0.97819	0.00864
17.5	0.981906	0.947898	0.979	0.993878	1.02703	0.961409	0.946261	0.988465	0.97141	0.00719
17.5333	0.967101	0.945683	0.978998	1.00056	1.02361	0.96647	0.961219	0.981913	0.96443	0.0094
17.5667	0.985508	0.931861	0.973115	0.995098	0.987224	0.959377	0.960337	0.978789	0.96474	0.0078
17.6	0.979297	0.924043	0.966192	0.957417	1.01582	0.948183	0.954077	0.970425	0.96219	0.00905
17.6333	0.982922	0.928965	0.958314	0.988792	0.993429	0.958621	0.948137	0.958715	0.95048	0.01546
17.6667	0.960658	0.928255	0.976627	0.994433	0.984099		0.94309	0.94818	0.96481	0.00441
17.7	0.984989	0.932917	0.964598	1.00564	0.978787	0.944448	0.865199	0.927259	0.96826	0.00537
17.7333	0.975479	0.955823	0.971139	0.954513	0.978858	0.971122	0.942611	0.968971	0.9751	0.00602
17.7667	0.977615	0.954646	0.965145	0.951296	0.982792	0.973957	0.950409	0.990239	0.97388	0.00551
17.8	0.958576	0.954691	0.960367	1.0017	0.971913	0.990689	0.974898	0.98793	0.97409	0.00659
17.8333	0.97589	0.945114	0.96538	0.993893	0.970742	0.989877	0.967146	0.982984	0.97019	0.00497
17.8667	0.975533	0.942616	0.956982	1.0004	0.97675	0.981218	0.966614	0.992614	0.97267	0.00673
17.9	0.965402	0.956917	0.963925	1.00161	0.978384	0.964324	0.967737	0.963196	0.95705	0.01494
17.9333	0.945584	0.96011	0.968719	1.00705	0.968826	0.991341	0.964103	0.975641	0.97927	0.00626
17.9667	0.972663	0.959362	0.957807	0.856155	0.978979	0.969768	0.968816	0.99284	0.98185	0.00606
18	0.980245	0.954585	0.972659	1.0087	0.962786	0.986124	0.972297	0.996761	0.98121	0.00679
18.0333	0.979101	0.948565	0.987391	1.00342	0.973011	0.985653	0.977555	1.00008	0.98074	0.00722
18.0667	0.970763	0.953884	0.989579	1.00654	0.968143	1.00332	0.965636	0.991826	0.97893	0.00639
18.1	0.990322	0.944002	0.976621	1.01699	0.97459	0.987989	0.97345	0.981961	0.95917	0.0198
18.1333	0.995936	0.945345	0.983436	1.00233	0.978368	0.984903	0.962708	0.978402	0.97248	0.00972
18.1667	0.996317	0.946878	0.993328	0.827706	0.974736	0.994076	0.958586	0.981716	0.96633	0.01685
18.2	0.993926	0.967481	0.983896	0.913018	0.977526	0.998438	0.957947	0.987582	0.98268	0.0063
18.2333	1.00555	0.966483	0.973379	1.00945	0.968704	0.857868	0.957957	0.991255	0.97012	0.0158
18.2667	0.982475	0.965522	0.992219	1.01227	0.98575	0.991291	0.953338	0.978546	0.98263	0.00643
18.3	0.99422	0.964385	0.982272	1.01477	0.967057	0.872593	0.95652	1.0091	0.98002	0.00738
18.3333	0.986095	0.957982	0.984741	1.01357	0.975363	0.985148	0.961036	0.997132	0.98273	0.00632
18.3667	0.98016	0.949867	0.978626	1.01578	0.971775	0.988483	0.958861	0.996643	0.96346	0.01506
18.4	0.977805	0.950644	0.989763	1.00227	0.982381	0.992485	0.965091	1.00137	0.97681	0.00523
18.4333	0.98327	0.959264	0.979496	0.985513	0.97891	0.863762	0.957526	0.99991	0.98041	0.00504
18.4667	0.982131	0.948957	0.978648	0.969465	0.98327	0.991488	0.966336	0.9942	0.97293	0.01306
18.5	0.986428	0.96584	0.981833	1.00345	0.981045	0.98699	0.956039	0.981669	0.9646	0.01742
18.5333	0.956601	0.965853	0.981763	1.00792	0.983018	0.997501	0.891965	0.998842	0.9766	0.00746
18.5667	0.95963	0.954051	0.967254	1.00784	0.982638	0.993153	0.852382	0.999879	0.96858	0.01675
18.6	0.966043	0.955444	0.975969	1.01668	0.983627	0.975057	0.949802	0.990194	0.96002	0.01045
18.6333	0.952326	0.959467	0.995799	1.01616	0.978352	0.981845	0.86355	1.00116	0.96561	0.01131
18.6667	0.95117	0.952461	0.995433	0.906222	0.98993	0.98643	0.951115	0.947373	0.97633	0.00733
18.7	0.947687	0.959685	1.00369	0.899358	0.985003	0.986786	0.965118	0.977576	0.98211	0.0091
18.7333	0.94163	0.957607	0.998906	1.0026	0.983309	0.987054	0.970165	0.969335	0.98466	0.00789
18.7667	0.94259	0.952328	1.00156	1.01532	0.991965	0.982828	0.967972	1.00233	0.98793	0.00556
18.8	0.949256	0.972658	1.01257	1.00835	0.994116	0.993948	0.960673	0.985678	0.97752	0.01153
18.8333	0.969811	0.970472	1.00326	1.00149	0.985582	0.986358	0.975679	1.01076	0.98941	0.00605
18.8667	0.972265	0.966068	1.01368	0.909874	0.986266	1.01001	0.969804	0.992231	0.99139	0.00826
18.9	0.975129	0.966639	1.01435	0.994875	0.998187	1.00176	0.969146	0.995152	0.99288	0.00655
18.9333	0.980348	0.954399	0.994651	1.02697	0.995186	1.00901	0.967138	1.00346	0.98011	0.00899
18.9667	0.978168	0.963243	1.00196	1.00895	1.00186	1.00208	0.973341	1.01344	0.99474	0.00624
19	0.98214	0.945649	1.00335	0.941874	0.998757	0.997494	0.96824	1.00337	0.98575	0.00719
19.0333	0.986332	0.965414	0.995986	1.01417	0.996167	1.00856	0.977275	1.01405	0.99155	0.00644
19.0667	0.98151	0.956208	0.995977		0.993952	1.00066	0.964903	1.00703	0.9962	0.00744
19.1	0.992684	0.956691	0.983155	1.00946	1.0056	1.00075	0.977363	1.00666	0.99407	0.00703
19.1333	0.990286	0.959033	0.999834	1.0118	1.00347	1.00703	0.974119	1.02401	0.99286	0.00797
19.1667	1.00515	0.959165	1.0016	1.0121	0.998809	1.00342	0.965989	1.00631	0.99157	0.008
19.2	0.984981	0.953985	1.00672	1.02229	0.991219	1.00254	0.970329	1.0108	0.99423	0.00546
19.2333	0.975008	0.959221	0.987905	1.0261	0.995739	0.99409	0.975267	1.01926	0.99783	0.00621
19.2667	0.995581	0.966743	0.99379	1.00105	0.996351	0.991735	0.986222	1.02239	0.99247	0.00638
19.3	0.99652	0.974133	1.00301	1.02351	0.996117		0.982366	1.00913	0.99658	0.0063
19.3333	0.991349	0.967854	0.976395	1.00379	0.998201		0.99113	1.01856	0.98466	0.00388
19.3667	0.98653	0.9807	0.990425	1.01329	0.984016	1.00399	0.983059	1.03063	0.99645	0.00291
19.4	0.98525	0.989604	0.979802	0.994366	0.992825	0.985017	0.990311	0.960128	0.99582	0.00481
19.4333	0.983624	0.986839	0.997632	1.0001	0.996572	0.997823	0.998512	1.01046	0.99684	0.00579
19.4667	0.981958	0.971015	0.998229	1.01168	0.994415	0.998455	1.00119	1.00965	0.98918	0.00565
19.5	0.992695	0.971826	0.981626	1.01358	0.997021	0.998538	0.995747	1.02366	0.98885	0.00995
19.5333	0.980576	0.962742	0.994697	1.01324	0.98616	0.976751	1.00287	0.996395	0.98062	0.00882
19.5667	0.975597	0.960152	1.00202	0.948627	0.995792	1.03888	0.98672	1.00298	0.98023	0.00747
19.6	0.958381	0.955524	1.0057	0.942626	1.00719	0.985177	0.99672	0.993681	0.98629	0.00889
19.6333	0.94991	0.967485	0.995562	0.953974	0.993833	1.00833	0.980339	0.992371	0.98473	0.00686
19.6667	0.968165	0.970686	0.995611	0.939709	1.00709	1.00433	0.989645	1.01508	0.99214	0.00492
19.7	0.981875	0.979892	0.986272	0.945083	0.997758	0.985943	0.987068	1.01392	0.9863	0.00548
19.7333	0.980484	0.983948	0.974637	1.01349	1.00067	0.985273	0.990105	1.0085	1.00083	0.00654
19.7667	0.983695	0.994994	0.967784	0.960357	0.996187	0.991218	0.988406	1.00773	0.97832	0.01956
19.8	0.984448	0.989447	0.973288	1.0071	0.999367	1.02097	1.0032	1.02885	0.99818	0.00494
19.8333	0.984332	0.99783	0.96356	1.01132	1.00208	0.847753	1.00286	1.0168	0.9757	0.02078
19.8667	0.979918	0.992924	0.983327	1.00374	1.00894	1.00328	0.991389	1.02194	0.99391	0.00409
19.9	0.975696	0.998014	0.988138	1.00839	1.00372	0.832804	0.991	1.00784	0.98563	0.01607
19.9333	0.976577	0.985253	0.982752	1.0113	0.995686	1.00389	0.99738	0.998451	0.98192	0.01739
19.9667	0.980859	0.98914	0.999513	1.00975	1.00923	0.878295	0.993907	1.02433	0.9973	0.00469
20	0.987719	0.991387	0.987521	1.01061	1.01114	0.862715	0.995692	1.00857	1.00385	0.00485
20.0333	0.969845	0.998303	0.996494	1.00452	0.992024	1.01025	0.99478	1.01221	1.00313	0.0049
20.0667	0.994385	0.98112	0.991281	1.01943	1.01291	1.00997	1.00407	1.01761	1.00401	0.00465
20.1	0.987804	0.985759	0.993357	1.01032	1.01952	1.0067	0.999322	1.02229	1.00143	0.00512
20.1333	0.993681	0.997116	0.999609	1.01651	0.996219	1.01542	0.988393	1.02514	1.00109	0.00254
20.1667	1.003	0.993947	0.977551	1.01448	1.00133	1.00528	0.991053	1.02477	0.99958	0.00456
20.2	1.00913	0.996692	0.990894	1.00174	0.997985	0.998857	0.99976	1.01364	0.99413	0.00643
20.2333	1.00043	0.997778	0.974299	1.01238	0.992752	1.00933	0.995815	1.01386	1.00144	0.00362
20.2667	0.989968	0.992347	1.00052	0.953877	0.99535	0.999543	1.00549	1.01592	1.00245	0.00385
20.3	1.01107	0.98922	0.99613	1.00786	0.993829	1.00279	0.992452	1.01818	0.99196	0.00762
20.3333	0.988163	1.00029	1.00054	1.01735	0.9924	1.00474	0.997457	1.01865	1.00185	0.00405
20.3667	0.982624	0.982946	1.00741	0.952348	0.999091	0.992416	0.991861	1.02697	0.99537	0.00679
20.4	0.998492	0.988026	1.01023	1.02099	0.991186	0.992659	1.00246	1.01073	1.00292	0.00267
20.4333	1.00678	0.983643	1.00291	1.00682	0.992795	0.953208	1.00961	1.00718	1.00181	0.00457
20.4667	0.997204	1.00123	1.01132	1.00323	0.988001	1.00944	1.00554	1.00736	0.99163	0.00703
20.5	0.986331	0.990196	1.00641	1.00964	1.00421	0.989996	1.00205	1.02563	0.99582	0.00643
20.5333	0.975374	0.982409	0.994928	0.953851	1.00028	1.01101	1.00423	1.01095	0.99954	0.00526
20.5667	1.00603	0.990401	0.993087	0.958899	0.991052	1.004	1.00085	1.0222	0.99803	0.00489
20.6	0.991212	0.992632	0.998595	0.975254	0.993943	1.00926	1.01259	1.02287	0.99746	0.0062
20.6333	1.00769	0.980922	0.992177		0.98902	0.994485	1.00206	1.01983	1.00406	0.00477
20.6667	1.00145	0.987544	0.985166	0.965079	0.998911	1.01361	1.01002	1.01786	0.99525	0.00352
20.7	1.00664	0.990259	0.995872		0.98845	1.01823	1.01049	1.01846	0.9983	0.00637
20.7333	0.999926	0.982213	0.988953		0.98916	0.994315	1.00323	1.00893	1.00244	0.00633
20.7667	0.999221	0.981535	0.983102		0.982841	1.00581	1.00954	1.02606	0.99827	0.00693
20.8	1.01222	0.981223	0.99711		0.984692	1.00972	1.00241	1.02967	1.00506	0.00469
20.8333	0.985738	0.966845	1.00832		0.990378	1.01493	1.00315	1.01853	0.99563	0.00579
20.8667	1.00645	0.984289	1.01078		0.991416	1.01791	1.01214	1.01247	0.99071	0.01705
20.9	0.993306	0.974425	0.980599		0.990489	1.01446	1.00382	1.01233	1.00214	0.00552
20.9333	1.00286	0.890119	1.01513		0.991552	1.01443	1.01068	1.01017	1.00243	0.00578
20.9667	0.998537	0.983591	1.00436		0.985503	1.024	1.0042	1.01477	1.00628	0.00533
21	1.0073	0.973449	1.00552		0.991079	1.0119	1.00897	1.01881	1.00099	0.00538
21.0333	1.00699	0.988424	1.00512		0.994901	1.00344	1.01245	1.03264	1.00526	0.0062
21.0667	1.01355	0.980261	1.01896		0.991605	0.991747	0.998677	1.01214	1.00144	0.00542
21.1	1.01432	0.982164	1.01121		0.9928	1.02924	0.992843	1.01424	0.99909	0.00655
21.1333	1.00315	0.979379	1.0007		0.988068	1.0231	1.00544	1.01026	1.00043	0.0052
21.1667	0.997433	0.975182	1.01147		1.00855	0.983415	0.992193	1.02538	0.99895	0.00574
21.2	0.993599	0.983026	1.00751	1.01744	1.00834	1.00625	0.975812	1.01144	1.00248	0.00589
21.2333	0.982025	0.98783	1.00208	1.02231	1.01101	0.987448	0.982132	1.01679	1.0035	0.00655
21.2667	1.00147	0.974828	0.994584	1.02077	1.0155	1.0093	0.984957	1.01843	1.00466	0.00461
21.3	0.992886	0.976345	1.01658	1.02479	1.01271	1.01014	0.97828	1.01631	1.01142	0.00586
21.3333	1.00253	0.984897	1.01474	1.02214	1.0145	1.01065	0.990386	0.997422	1.00424	0.00567
21.3667	1.00573	0.988096	1.00173	1.02669	1.01816	1.03418	0.993583	1.02319	1.00348	0.00485
21.4	0.99155	0.98421	1.01349		1.02036	1.01677	0.989954	1.01338	1.00764	0.00497
21.4333	0.986619	0.991248	1.01282	1.02376	1.01863	1.00437	0.998083	0.992324	1.01201	0.00566
21.4667	0.987213	0.989435	1.0064	1.02551	1.01705	1.0174	1.00122	1.01692	0.98645	0.01643
21.5	0.995215	0.9856	1.01908	1.02658	1.01316	1.01256	1.00872	1.0352	1.00568	0.00534
21.5333	0.992301	0.984117	1.00398		1.02564	0.892361	0.999715	1.00702	1.00785	0.00575
21.5667	0.989416	0.987745	1.00461		1.02178	1.02229	1.00088	1.01303	1.00612	0.00497
21.6	0.993524	0.99076	1.00402		1.01298	1.01898	1.00085	1.03387	0.97662	0.02568
21.6333	0.99198	0.995333	1.00555		1.02065	1.01875	0.992097	1.0185	1.0034	0.00817
21.6667	0.985413	0.992105	1.00253		1.014	0.825	0.996861	1.02043	1.00388	0.00404
21.7	0.968979	0.995289	1.00032		1.0219	1.02083	0.987635	1.02883	0.98331	0.01862
21.7333	0.994693	0.98981	1.00094		1.02088	1.01141	0.999881	1.00954	0.99922	0.01041
21.7667	0.991384	0.973333	1.00406		1.01679	0.876828	1.00607	1.0147	0.99472	0.01037
21.8	0.981383	0.947501	0.998215		1.02139	1.00797	1.00897	1.02913	0.99943	0.00596
21.8333	0.988576	0.937728	0.994573		1.0137	1.02112	1.00115	1.0062	0.99854	0.00602
21.8667	1.00145	0.964447	1.00563		1.01084	1.00794	1.00259	1.0031	1.00067	0.00529
21.9	0.980023	0.974946	0.998484		1.01956	1.00901	1.00638	1.00139	1.00153	0.005
21.9333	0.981978	0.984955	1.00012		1.00483	1.01568	0.998332	1.0188	1.00223	0.00579
21.9667	0.995725	0.981731	1.0131		1.00077		1.00258	1.01526	1.00552	0.00536
22	0.995348	0.975281	1.00043		1.00503	1.01074	1.00302	1.02574	1.0035	0.0034
22.0333	0.986716	0.987088	1.00637		1.00515	1.01607	1.01319	1.02407	1.00551	0.00581
22.0667	0.99558	0.991455	1.00145	1.00686	0.999335	1.00331	1.00655	1.02344	1.00178	0.00341
22.1	0.986713	0.994351	1.0048		0.995228	1.02505	1.00564	1.02681	1.00652	0.00471
22.1333	0.991129	0.988885	1.00321		1.00173	1.01443	1.0057	1.00737	1.00483	0.00679
22.1667	1.00949	0.981901	1.00084		1.01054	1.01771	1.0066	1.01853	1.00654	0.00424
22.2	0.994274	0.972616	1.01084		0.998914	1.01181	1.01886	1.0265	1.00272	0.00576
22.2333	0.997085	0.989971	1.00689		1.00961	1.01143	1.00535	1.02542	1.00346	0.00483
22.2667	0.986756	0.987215	0.997076		1.00083	1.00398	1.01286	1.03029	1.00677	0.00457
22.3	0.999652	0.978908	1.00859		1.00077	1.00665	1.00933	1.02032	0.99689	0.00909
22.3333	0.995955	0.987761	1.00578		1.0065	1.02339	1.01127	1.01676	1.00465	0.00557
22.3667	0.995768	0.972843	1.01074	0.945832	1.00313	1.01085	1.01011	1.02584	0.99763	0.00578
22.4	1.00126	0.980555	0.998053		1.00221	1.02547	1.00523	1.01975	1.00427	0.00404
22.4333	0.986124	0.982072	0.988076		0.999353	1.00253	0.997474	1.02781	1.00518	0.00447
22.4667	0.992403	0.987693	1.00592		1.00684	1.01064	1.00762	1.01877	0.9977	0.00785
22.5	1.00849	0.987849	0.993574		1.00295	1.01491	1.00628	1.02223	1.00748	0.00476
22.5333	1.00064	0.993721	0.997315	0.94749	1.01225	1.0172	0.997474	1.0155	1.00288	0.00433
22.5667	0.996616	0.985285	1.00825	1.02608	1.00793	1.01626	0.999082	1.02031	1.00837	0.00385
22.6	1.00288	0.994658	1.00727		0.997404	1.00209	0.990331	1.02551	1.00823	0.00507
22.6333	1.00904	0.993162	1.00296	1.02643	1.00187	1.01606	1.00034	1.01713	1.00669	0.00248
22.6667	1.0042	0.988847	0.998419	1.02291	1.01092	1.02973	0.994212	1.01665	1.00002	0.00692
22.7	1.00373	0.998493	1.00405	1.01088	1.00068	1.01891	1.00329	1.01351	1.00645	0.00638
22.7333	1.00878	0.982137	1.01086	0.962153	0.995071	1.00429	1.01551	1.02133	1.00402	0.00396
22.7667	0.997592	0.979174	1.00155	1.01964	1.00868		1.00592	1.03257	1.00502	0.00484
22.8	0.990103	0.990633	1.00197		1.00834	1.00828	1.01055	1.01825	0.99604	0.01087
22.8333	0.992625	0.987333	0.995787	1.01689	1.0127	1.00276	1.00355	1.02851	0.99764	0.00733
22.8667	1.00967	0.981764	0.996179	0.928584	1.00414	1.01634	1.00135	1.0303	1.00416	0.00225
22.9	0.995381	0.986306	0.996299	0.954845	1.00642	1.01339	1.00519	1.02329	0.99695	0.00407
22.9333	1.00853	0.99301	1.00188	1.00765	1.00257	1.00573	0.999797	1.01415	1.00498	0.005
22.9667	1.00941	0.984363	0.998081	0.977567	0.992901	1.00192	1.00114	1.01026	1.00111	0.00665
23	1.00045	0.981477	0.991119	1.00857	1.01431	1.01863	1.00197	1.02334	1.00443	0.003
23.0333	1.01161	0.968949	1.00549	1.00637	0.991844	1.00374	0.987937	1.03298	1.00206	0.00503
23.0667	0.99876	0.990414	1.00409	1.00692	1.00831	1.01973	1.00067	1.00653	0.99912	0.00767
23.1	1.01528	0.985921	0.995818	0.989242	1.00038	1.0236	0.990706	1.01554	1.00641	0.00641
23.1333	1.01272	0.992582	0.991743	0.952309	1.01839	1.01061	0.997607	1.01696	1.00947	0.0057
23.1667	1.01832	0.976878	0.993825	1.01689	1.0045	1.03653	0.996322	1.00798	0.99115	0.01037
23.2	1.01193	0.984345	0.994279	1.01824	1.02482	1.02992	0.996223	1.01603	0.99734	0.00558
23.2333	1.00964	0.975714	1.00357	0.925528	0.994406	1.01939	0.999729	1.00121	0.98278	0.02156
23.2667	1.00456	0.964086	0.989249	1.01435	1.00327	1.0095	1.00179	0.991938	1.00869	0.00347
23.3	1.01863	0.972575	1.00196	1.01674	1.00224	0.836305	0.998992	1.01476	1.00513	0.00598
23.3333	1.00285	0.993927	1.00992	1.00298	1.0191	1.01139	1.00468	1.02469	0.99831	0.00561
23.3667	1.0143	0.977772	1.00673	0.998327	1.01848		0.996166	1.02412	0.99365	0.01363
23.4	1.00499	0.974799	1.01316	0.994609	0.989507		0.993118	1.01797	0.9741	0.01936
23.4333	1.01744	0.985237	1.01144	0.992404	0.904429	1.00124	1.00877	1.02827	0.99778	0.00413
23.4667	0.999901	0.987526	1.00598	0.997607	0.911626	0.865815	1.00781	1.01653	0.98855	0.01469
23.5	0.987249	0.981156	0.996355	1.00143	0.999247		1.00527	1.01374	1.00624	0.00401

## Sheet: ED Figure 4D
								440 nm											480 nm									520 nm										560 nm										600 nm
Time(s)	1	2	3	4	5	6	7	Mean	SEM		Time(s)	1	2	3	4	5	6	7	Mean	SEM		Time(s)	1	2	3	4	5	Mean	SEM		Time(s)	1	2	3	4	5	6	Mean	SEM		Time(s)	1	2	3	4	5	6	Mean	SEM
0.033333	0.995859	0.988069	1.003	0.991623		1.00164	1.0077	0.997981	0.00303428		0.033333	1.01196	1.00774	1.0143	1.01239	0.99236	0.999903	0.987832	1.00378	0.00398551		0.033333	1.0012	0.999943	0.993362	0.983667	1.01698	0.99903	0.00545825		0.033333	0.990544	1.02869	0.999151	1.00215	1.00247	0.9968	1.0033	0.0053809		0.033333	0.9937	0.999311	1.00268	1.00489	1.00646	0.968532	0.995928	0.00578409
0.066667	0.999924	0.998087	1.01249	0.994296	1.0117	0.999631	0.992136	1.00118	0.00301341		0.066667	1.00768	1.00654	1.0138	1.00749	1.00085		0.988888	1.00421	0.0034941		0.066667	1.00792	1.00216	0.992471	0.989562	1.01271	1.00097	0.00441602		0.066667	0.991421	1.02142	1.01134	0.999808	1.00104	0.997107	1.00369	0.00443001		0.066667	0.987796	0.99509	1.00944	0.999743	1.00661	0.979543	0.996371	0.00463837
0.1	0.992385	0.992142	1.01151	0.99124	1.01369	0.987855	0.999274	0.998299	0.00391598		0.1	1.01714	1.00527	1.01701	1.01901	0.984703		0.992289	1.0059	0.00593506		0.1	1.01265	1.00586	0.992574	0.997143	1.02017	1.00568	0.00501645		0.1	0.996083	1.01	0.992367	1.0085	0.996796	1.00378	1.00126	0.00295008		0.1	0.996624	1.00274	1.01897	1.01113	1.01441	0.992185	1.00601	0.00429978
0.133333	0.991689	0.996193	1.01609	0.995675	1.01786	0.993516	0.999528	1.00151	0.00410201		0.133333	0.999026	1.01437	1.00387	1.03585	0.995765		0.984657	1.00559	0.00724207		0.133333	1.00998	1.00621	0.971466	0.995237	1.01328	0.999234	0.00757749		0.133333	0.997588	1.02845	1.01451	1.00061	0.994514	0.988666	1.00406	0.00601713		0.133333	0.991271	1.00038	1.02505	1.00763	1.01284	0.98401	1.00353	0.00607632
0.166667	0.996201	0.993816	1.01681	0.989601		0.993203	0.990723	0.996726	0.00412877		0.166667	1.00387	1.00949	1.01442	1.036	0.985549		0.997473	1.0078	0.00697329		0.166667	1.01318	0.999692	0.98688	0.995105	1.01574	1.00212	0.00545496		0.166667	0.995783	1.00854	1.02001	1.01699	0.998153	0.991907	1.00523	0.00477721		0.166667	1.00147	1.0017	1.00012	1.01332	1.01753	0.987507	1.00361	0.0043499
0.2	0.999616	1.00426	1.00679	0.984604	1.01344	0.994995	0.993156	0.999552	0.00362754		0.2	0.975388	1.00385	1.00955	1.03291	0.986945		0.992134	1.00013	0.00821943		0.2	1.01176	1.00539	0.980115	0.995177	1.00681	0.999849	0.00562197		0.2	0.999464	1.01217	1.01206	1.01447	1.00091	0.9845	1.00393	0.00466093		0.2	1.00188	0.997778	1.00538	1.00777	1.01497	0.98224	1.00167	0.00454785
0.233333	1.00887	1.00544	1.01866	0.986825	1.02103	0.982062	0.999994	1.00327	0.00560413		0.233333	0.9942	1.00625	1.02171	1.04234	0.982622		0.997741	1.00748	0.0087725		0.233333	1.01974	1.00673	0.993233	1.00141	1.01261	1.00675	0.00455203		0.233333	0.99486	1.01146	1.01473	1.01187	0.99259	0.996737	1.00371	0.0040768		0.233333	0.99446	0.989307	1.02572	1.01053	1.00292	0.9877	1.00177	0.00593918
0.266667	1.00419	1.01251	1.00776	0.996033	1.00612	0.993323	0.99607	1.00229	0.00272008		0.266667	0.997291	1.00026	1.01468	1.03215	0.986336		0.999921	1.00511	0.00654945		0.266667	1.01857	1.00317	0.99725	1.00345	1.00685	1.00586	0.00353418		0.266667	0.992419	1.00623	1.00625	1.00492	1.00569	0.997098	1.0021	0.0024075		0.266667	1.0037	0.990818	1.01272	1.00222	1.01593	0.97398	0.999894	0.00631276
0.3	1.00428	1.0014	1.01365	0.985259	1.00124	0.990579	0.99099	0.9982	0.00369258		0.3	1.0007	0.999375	1.01451	1.03967	0.978515		1.00281	1.00593	0.0082536		0.3	1.02034	1.01285	0.983599	0.996462	1.00197	1.00305	0.00639529		0.3	0.9833	1.01096	1.01659	1.00819	0.984415	0.99478	0.999705	0.00580486		0.3	1.00077	0.986375	1.01218	1.00184	1.00374	0.980621	0.997587	0.00480467
0.333333	1.00811	1.00489	1.01088	0.991897	1.01705	1.00241	0.996253	1.0045	0.00324605		0.333333	1.00423	1.00056	1.01141	1.03024	0.984505		0.998135	1.00485	0.00623258		0.333333	1.02321	1.01334	0.99692	1.00051	0.996216	1.00604	0.00528312		0.333333	0.99469	1.01206	1.01426	1.00852	0.96531	1.00475	0.999932	0.00747333		0.333333	1.00232	0.998075	0.999589	0.972228	1.01342	0.992168	0.996299	0.0055967
0.366667	1.01077	1.01099	1.01639	1.00072	1.00747	0.998832	0.994649	1.00569	0.00294877		0.366667	1.00648	0.998601	1.01897	1.03754	0.989487		1.00288	1.00899	0.00694347		0.366667	1.02449	1.00131	0.988842	0.994911	0.999926	1.00189	0.00605684		0.366667	0.989565	1.00828	0.993857	1.0096	0.963322	1.00262	0.99454	0.00702494		0.366667	0.993353	0.98488	0.995824	0.98212	1.01731	0.981727	0.992535	0.00550464
0.4	0.999836	1.00869	1.01589	0.993529	1.00699	0.993858	0.998351	1.00245	0.00315174		0.4	1.00428	0.991337	1.01249	1.03314	0.991315		0.992893	1.00424	0.00674716		0.4	1.01454	1.00233	0.993272	0.998061	0.984647	0.998571	0.00495731		0.4	1.00018	1.00671	1.00149	1.00658	0.97267	0.994845	0.997077	0.00520496		0.4	1.00888	0.984681	1.00559	0.988826	1.00974	0.996106	0.998969	0.00437093
0.433333	1.00332	1.01252	1.02818	0.996576		1.00402	1.00139	1.00767	0.00461516		0.433333	1.00932	0.98447	1.01182	1.04339	0.999503		1.00893	1.00957	0.00791788		0.433333	1.01997	0.99354	0.979431	0.991891	0.979692	0.992905	0.00738298		0.433333	0.980765	1.01432	1.01585	1.00557	0.992338	0.992766	1.00027	0.0056806		0.433333	0.999985	0.995554	1.00575	0.992876	1.00917	0.988443	0.99863	0.00321427
0.466667	0.998816	1.00699	1.00732	1.00195	1.0037	1.00701	0.999755	1.00365	0.0013575		0.466667	1.00254	0.980819	1.01285	1.03724	0.990453		0.999353	1.00388	0.00801631		0.466667	1.02198	0.997602	0.976132	0.990418	0.987145	0.994656	0.00765816		0.466667	0.986762	0.996618	1.00406	1.01127	1.00566	0.996857	1.0002	0.00352009		0.466667	0.999025	0.994785	0.992051	0.977047	1.01796	0.98324	0.994018	0.00579371
0.5	0.992462	1.00961	1.00989	1.00046	1.00421	0.996308	0.998908	1.00169	0.00248635		0.5	1.00689	0.981623	1.00364	1.03234	0.98765		1.00831	1.00341	0.00729478		0.5	1.00715	1.00718	0.979487	0.993985	0.983042	0.994167	0.00581824		0.5	0.998792	1.0073	1.02139	1.00841	1.00573	1.00733	1.00816	0.00300118		0.5	1.00579	1.00562	1.0031	0.985197	1.01657	1.0052	1.00358	0.00415801
0.533333	0.986592	1.01006	1.01233	0.99961	1.00768	1.00217	1.00423	1.00324	0.00324154		0.533333	1.00792	0.977293	0.975054	1.03536	0.99312		1.00377	0.998753	0.0091344		0.533333	1.01233	0.999451	0.98862	0.993347	0.977632	0.994276	0.00575604		0.533333	0.999592	0.996271	0.999287	1.0061	1.0091	0.998794	1.00152	0.00201793		0.533333	1.00166	1.0051	0.993416	0.989958	1.01183	0.996366	0.999722	0.00329481
0.566667	0.983371	1.00457	1.00616	1.01437	1.0044	1.00124	1.00376	1.00255	0.00355615		0.566667	1.00741	0.981721	1.00608	1.02556	0.993357		1.00515	1.00321	0.00602224		0.566667	1.00718	1.00506	0.986986	0.992463	0.980488	0.994435	0.00514412		0.566667	0.986919	0.996768	1.00017	1.00719	0.997393	1.00341	0.998641	0.00283154		0.566667	0.996406	1.00729	0.989751	1.00355	1.01121	1.00112	1.00156	0.00314255
0.6	0.981588	1.00326	1.00964	1.00665	1.00327	0.999343	1.00199	1.00082	0.0034408		0.6	1.01293	0.976529	1.0062	1.02415	0.989724		1.00036	1.00165	0.0069014		0.6	1.00286	1.00782	0.967313	0.980713	0.969088	0.98556	0.00843439		0.6	0.994035	0.987577	1.0168	1.00165	0.992903	1.00678	0.999958	0.00436399		0.6	1.01633	1.01395	0.989126	1.00268	1.00792	0.996369	1.0044	0.00426864
0.633333	0.976363	1.01458	0.992862	1.00262		1.00673	0.999907	0.998844	0.00537431		0.633333	1.0065	0.969211	1.0002	1.02291	0.992002		0.999352	0.998362	0.00721876		0.633333	0.988888	0.995853	0.978874	0.992947	0.976263	0.986565	0.00385783		0.633333	0.995521	0.983504	1.01719	1.00851	0.974353	1.00782	0.997817	0.00670934		0.633333	1.01506	1.00447	1.00113	1.01633	1.01638	1.00047	1.00897	0.00316252
0.666667	0.990429	1.00323	1.00017	1.0152		1.0089	1.00623	1.00403	0.00343441		0.666667	1.0002	0.970504	0.996176	0.997601	0.980204		1.00297	0.991276	0.00527418		0.666667	0.976978	0.993844	0.97399	0.985861	0.967675	0.97967	0.00459686		0.666667	0.99549	0.985437	0.985523	0.992595	0.987228	1.00708	0.992226	0.00340338		0.666667	1.01136	1.00795	1.00068	1.00454	1.00324	1.00563	1.00557	0.00152291
0.7	0.992156	1.00525	1.00762	1.00054	1.01353	1.01035	1.00811	1.00536	0.0026808		0.7	1.01106	0.967243	0.998639	0.987618	0.999537		0.994985	0.99318	0.00604635		0.7	0.960938	0.996753	0.983858	0.984477	0.978831	0.980971	0.00581205		0.7	1.00529	0.991737	0.996083	1.0089	0.99402	0.998254	0.999048	0.00273414		0.7	1.00068	1.00869	0.996008	1.01283	1.01004	1.00894	1.0062	0.00262539
0.733333	1.01025	0.997502	1.0057	1.00924	1.01098	1.00584	1.01689	1.00806	0.00226118		0.733333	1.01759	0.979877	0.992519	0.994524	0.976616		1.00188	0.993835	0.00611742		0.733333		1.00656	0.993486	0.987482	0.979809	0.991834	0.00565048		0.733333	1.00311	0.986303	1.00454	0.982105	0.986485	0.99628	0.993136	0.00388123		0.733333	1.0021	1.00711	0.963725	1.0162	0.993223	1.00482	0.997861	0.00747156
0.766667	1.00788	1.00001	1.0068	1.00545	0.980503	1.01457		1.00254	0.0048027		0.766667	1.01122	0.980082	0.996675	0.979172	0.990454		1.00673	0.994054	0.00545185		0.766667		1.00634	0.989595	0.999295	0.978144	0.993344	0.00612014		0.766667	0.998828		0.955947	0.993739	0.977745	0.999508	0.985153	0.0082905		0.766667	1.00447	1.00884	0.980543	1.01175	0.97553	0.991756	0.995481	0.00621541
0.8	1.00031	0.990867	1.00393	1.01166	1.02294	1.01296		1.00711	0.00456639		0.8	1.01495	0.989644	0.989773	0.972279	0.990648	0.993974	1.00515	0.993774	0.00507757		0.8	0.964365	1.00585	0.997153	0.99106	0.986258	0.988938	0.0069611		0.8	0.990857	0.987393	0.970983	0.99293	0.983824	1.0037	0.988281	0.00441903		0.8	1.01403	1.01672	0.988948	1.01715	0.999948	0.991334	1.00469	0.00527906
0.833333	1.0096	0.993428	0.996074	1.00464	1.02184	0.999515		1.00418	0.00426001		0.833333		0.964182	0.986958	0.975802	1.00343	0.992796	1.00265	0.987637	0.00630394		0.833333	0.984862	1.00512	0.989338	0.993983	0.976401	0.98994	0.00477563		0.833333	0.990478	0.988413	0.96312	0.98931	0.994633	0.998526	0.987413	0.00509822		0.833333	1.00441	1.00831	0.982729	1.01576	0.999993	0.992228	1.00057	0.00480806
0.866667	1.00731	0.986245	0.997514	1.00812		0.996939		0.999225	0.00400655		0.866667	1.00918	0.993844	0.971281	0.976231	0.993789		1.00665	0.991829	0.00630896		0.866667	0.989742	1.00471	1.00398	0.989845	0.997862	0.997226	0.00325873		0.866667	0.988961	0.987422	1.01473	0.994159	0.991366	0.998087	0.995787	0.00409433		0.866667	0.996002	1.00431	0.983341	1.01194	0.986167	0.990854	0.995437	0.00448981
0.9	1.0143	0.991747	0.997635	1.01049	1.01117	1.01818		1.00725	0.00419486		0.9	1.00426	0.994053	0.97972	0.945055	0.99041		1.01309	0.987764	0.00974444		0.9	0.976701	1.01275	0.986444	0.993702	1.00137	0.994194	0.00617326		0.9	0.996109	0.985373	1.01424	0.978576	0.987863	1.00453	0.994448	0.00539646		0.9	1.00268	1.00115	0.997264	1.01158	1.00504	0.985674	1.00057	0.00355344
0.933333	1.01205	0.989992	0.997669	1.00143		1.0002		1.00027	0.00355422		0.933333	1.0117	0.995042	0.983657	0.948339	0.980527	0.999832	1.01224	0.99019	0.00838474		0.933333	0.981868	1.00673	0.992033	0.99659	1.00251	0.995945	0.00431957		0.933333	1.00842	0.986472	0.992119	0.98853	0.993759	1.00184	0.99519	0.00342087		0.933333	0.995258	1.00691	1.00698	1.00655	1.00587	0.994744	1.00272	0.00244721
0.966667	1.00443	0.976762	0.988902	1.01452	1.02324	1.00017		1.00134	0.00688705		0.966667	1.02148	0.994579	1.00303	0.950207	0.989561	0.991457	1.00559	0.993701	0.00833067		0.966667	0.983737	1.01838	0.998191	0.999504	1.00009	0.999981	0.00550384		0.966667	0.999588	0.984243	1.01175	0.985072	1.00115	0.992368	0.995695	0.00431169		0.966667	0.992211	1.00023	1.00405	0.998679	1.01521	0.993027	1.00057	0.00344965
1	1.00338	0.960601	1.00186	1.0123	1.00379	0.992375		0.995717	0.00748528		1	1.02144	1.00554	1.00557	0.963675	0.988024		1.00231	0.997759	0.00808192		1		1.01732	0.984206	1.00039	1.00018	1.00052	0.00676053		1	1.002	1.00279	1.00228	0.987291	0.993669	0.996934	0.997493	0.0025181		1	0.992732	1.00054	0.999594	0.995177	1.0102	1.00195	1.00003	0.00247905
1.03333	1.00475	0.983207	1.00422	1.00379	1.0045	1.00732		1.0013	0.00365362		1.03333	1.005	1.00628	1.00501	0.973121	1.01549		0.994165	0.999844	0.00601599		1.03333	1.01323	1.01776	0.99107	0.988376	1.00867	1.00382	0.00594699		1.03333	0.996346	0.992858	1.00947	0.987669	0.997606	0.999655	0.997267	0.00298372		1.03333	1.00602	0.989542	0.987232	1.00028	1.00967	0.995918	0.99811	0.00363926
1.06667	1.01089	0.986663	0.99588	1.00794	1.00018	0.983723		0.997546	0.00449202		1.06667	1.01227	1.00335	1.00574	0.975599	1.00506		0.993808	0.999302	0.00532587		1.06667	1.00555	1.01903	0.999866	1.00268	1.00037	1.0055	0.00352956		1.06667	0.995598	0.99629	0.995073	0.993557	1.00145	0.999393	0.996893	0.00120384		1.06667	1.0089	0.9929	0.980857	0.991603	0.999265	1.00356	0.99618	0.00405029
1.1	1.01136	0.99607	0.99596	1.00102	0.994891	1.01638		1.00261	0.00371983		1.1	1.00625	1.00883	1.00835	0.978715	1.0018	0.996529	0.979705	0.997169	0.00490643		1.1	0.986639	1.01308	0.998533	1.003	1.0046	1.00117	0.00433125		1.1	1.00562	0.991455	0.991499	0.982245	0.997944	1.00507	0.995639	0.00368749		1.1	1.00925	0.988152	1.01682	0.99885	0.995462	1.00762	1.00269	0.00426305
1.13333	1.01023	1.00398	1.00128	0.998201	0.982024			0.999141	0.00471557		1.13333	0.996188	1.00245	1.00755	0.989587	0.998652	0.993083	0.986738	0.996321	0.00274618		1.13333	0.96955	1.0091	0.994477	1.00181	1.00955	0.996898	0.00737158		1.13333	1.00035	0.988176	1.00403	0.986539	1.00634	1.00292	0.998061	0.00348124		1.13333	1.00994	1.00436	0.982955	1.00139	0.997095	1.00614	1.00031	0.00389764
1.16667	1.00572	1.0052	1.00518	0.991617	0.982362			0.998017	0.00473468		1.16667	0.993131	1.01315	1.0059	1.01012	1.00902	0.999791	0.986028	1.00245	0.00375409		1.16667	0.972405	1.00825	1.00043	1.00031	1.00648	0.997572	0.00648929		1.16667	0.992194	0.984624	1.01215	0.996332	1.00733	0.993977	0.997768	0.00415781		1.16667	1.01743	1.00963	0.991742	1.00723	1.00186	1.00895	1.00614	0.00353218
1.2	1.0117	1.00605		0.99719	0.988633	0.976785		0.996071	0.0062143		1.2	0.992156	1.00523	0.993288	1.01034	1.01439	0.981759	0.985532	0.997527	0.00474883		1.2	0.953917	1.00621	1.00838	1.00585	1.01518	0.997906	0.0111245		1.2	1.00526	0.991185	1.00036	1.00029	1.01298	1.00983	1.00332	0.00318711		1.2	1.01542	1.00961	1.00473	1.00559	0.986606	1.01358	1.00592	0.00423104
1.23333	1.00824	1.01093		1.00163	0.998562	0.957697		0.995411	0.00968559		1.23333	1.00336	1.00306	1.00664	1.02134	1.0062	0.996173	0.995503	1.00461	0.00325317		1.23333	0.957208	0.99695	1.00514	1.00272	1.00346	0.993096	0.00907731		1.23333	1.00726	0.985839	0.997994	0.994531	1.00972	1.00599	1.00022	0.00372965		1.23333	1.0138	0.99457	0.983244	1.00106	0.995915	1.00084	0.998238	0.00408509
1.26667	1.00957	1.01084		0.999427	0.991797	0.96561		0.995449	0.00823385		1.26667	0.999854	1.00799	1.00295	1.00437	1.01321	0.99163	1.00534	1.00362	0.00254871		1.26667	0.958373	0.995129	1.01936	0.99443	1.00948	0.995354	0.0103546		1.26667	1.00427	0.995001	0.967381	0.985102	1.01617	1.00651	0.995739	0.00712785		1.26667	1.01543	1.00958	0.995301	1.00865	0.974289	1.00925	1.00208	0.00618427
1.3	0.998695	1.01691		0.98937	0.991341	0.987308		0.996725	0.00539944		1.3	0.989064	1.0126	0.990001	0.994332	0.985702	1.00026	0.992905	0.994981	0.0034122		1.3	0.965324	1.00117	1.0029		0.99974	0.992284	0.00900969		1.3	1.0013	0.991295	0.992927	0.991193	1.01285	1.00343	0.998834	0.00353029		1.3	1.0049	1.00141	0.984902	0.999413		1.01073	1.00027	0.00429594
1.33333	1.00781	1.0183		0.991132	0.996194	0.997043		1.00209	0.00487689		1.33333	0.99094	1.00991	1.00355	0.98465	1.01419		0.997666	1.00015	0.00460131		1.33333	0.964604	0.99982	0.997403	0.981352	1.0079	0.990216	0.00771729		1.33333	1.00198	0.99367	0.991071	0.997982	1.00482	1.00003	0.99826	0.00210466		1.33333	0.998905	0.996034	0.999286	0.997721		1.00478	0.999346	0.00147265
1.36667	1.0008	1.01599		0.995405	0.977038	1.0026		0.998368	0.00631662		1.36667	0.994927	1.01909	1.01501	0.993439	0.991822	0.999931	0.994409	1.00123	0.00421521		1.36667	0.952022	0.997339	1.00902	0.987796	1.01417	0.992069	0.0110126		1.36667	0.9663	1.00234	1.0045	1.00253	1.0125	0.99819	0.997726	0.00657347		1.36667	0.994244	0.998468	1.00406	1.01104		1.01835	1.00523	0.00432198
1.4	0.996342	1.02029		0.984856	0.990278	0.99309		0.996972	0.00612761		1.4	1.01216	1.01044	0.991869	0.971496	1.00506	0.997537	0.995576	0.997734	0.00523447		1.4	0.985975	0.99834	1.01684	1.00681	1.01133	1.00386	0.00540094		1.4	0.96953	0.998721	1.01551	0.999392	1.01124	1.00161	0.999333	0.00657534		1.4	0.988607	0.989481	0.997119	1.00687	0.950545	1.01439	0.991169	0.00909413
1.43333	1.00444	1.00965	1.01039	0.995752	0.970293	0.976806		0.994556	0.00702749		1.43333	0.988692	1.00532	1.00053	0.973036	1.00851	1.00805	0.990393	0.996362	0.00492912		1.43333	0.99313	0.994555	1.01965	1.00611	1.01423	1.00553	0.00524181		1.43333	1.01041	0.982387	0.975936	1.00157	1.02249	0.999763	0.99876	0.00706353		1.43333	0.992132	0.996831	0.998023	1.01139	0.961512	1.01666	0.996091	0.00790105
1.46667	0.998402	1.01549	0.992941	0.984006	0.972044	0.987229		0.991686	0.00599497		1.46667	1.00104	1.00855	0.995638	0.969469	1.01235	1.01719	0.995741	0.999996	0.00595898		1.46667	1.0019	0.994669	1.02318	1.00449	1.00789	1.00643	0.00471932		1.46667	1.00782	0.994804	0.983954	1.00941	1.014	1.00007	1.00168	0.00452157		1.46667	0.988631	0.999591	1.00296	0.999206	0.974485	1.0091	0.995662	0.00503223
1.5	1.00492	1.01943	0.982402	0.985439	0.975081	0.990939		0.993036	0.00667227		1.5	0.984999	1.01033	0.992907	0.976191	1.01643	0.994452	0.995911	0.995888	0.00522799		1.5	1.01797	0.994253	1.0287	1.01009	1.01143	1.01249	0.00562266		1.5	1.01893	1.01001	1.00939	0.994534	1.01235	1.00297	1.00803	0.00342036		1.5	1.00175	0.993539	1.00565	0.986808	0.974258	1.00996	0.995328	0.00542121
1.53333	1.00245	1.01073	0.989622	0.993082	0.977358			0.994648	0.00568388		1.53333	0.99349	1.01334	0.989546	0.987401	1.00436	1.01502	0.985608	0.998396	0.00468589		1.53333	1.02488	0.995435	1.01369	1.00607	1.02018	1.01205	0.00522207		1.53333	1.01493	1.01429	1.00167	0.986164	1.01361	1.0011	1.00529	0.00461758		1.53333	0.989511	0.996637	1.0046	0.979497	0.982028	1.01778	0.99501	0.00592345
1.56667	1.002	0.993284	0.996464	0.990092	0.980794	1.00955		0.995365	0.00404583		1.56667	0.978919	1.01459	1.0046	0.99428	1.00892	1.00975	0.999687	1.00153	0.00454951		1.56667	1.01581	0.991009	1.00733	1.00354	1.01371	1.00628	0.0044044		1.56667	1.01551	1.01294	1.00362	0.980374	1.01184	0.995204	1.00325	0.00549645		1.56667	0.998108	1.00445	1.00173	0.983934	0.979009	1.00963	0.996144	0.00492821
1.6	0.998233	1.0101	0.977795	0.988705	0.998651	0.988114		0.9936	0.00455777		1.6	0.941386	1.01685	0.97967	0.991088	0.99715	0.986764	0.99646	0.987052	0.00877561		1.6	1.01681	0.98256	1.01388	1.00874	1.01348	1.00709	0.00626828		1.6	1.01592	1.00308	0.996557	0.98336	1.01154	1.00338	1.0023	0.00470517		1.6	0.998489	0.998411	0.998065	1.00959	0.986642	1.00344	0.999107	0.00308785
1.63333	0.983933	1.00932	0.982292	0.984252	0.98059	0.995017		0.989234	0.00451909		1.63333	0.948774	1.01039	0.983915	0.993669	1.01221	1.00347	0.99723	0.992808	0.00821972		1.63333	1.02009	0.989609	1.01135	1.01527	1.00762	1.00879	0.00522285		1.63333	1.00789	1.00292	0.995422	0.988716	1.01055	1.00117	1.00111	0.00328787		1.63333	1.00026	0.998052	0.986534	0.984029	0.985077	1.01315	0.994517	0.00467475
1.66667	0.993373	1.0016	0.988989	0.993013	0.989613	1.01787		0.997408	0.00448455		1.66667	0.977571	1.01479	0.986837	0.984171	1.00905	1.01303	0.99845	0.9977	0.00569598		1.66667	1.02243	0.998076	1.01406	1.0174	1.01762	1.01392	0.0041789		1.66667	1.01529	0.996916	1.0124	0.99988	1.01291	1.00221	1.0066	0.00319996		1.66667	1.00016	0.99251	0.990714	0.998829	0.993404	1.00474	0.996726	0.00220166
1.7	0.991231	0.994109	0.988299	1.00002	0.986976	1.00254		0.993861	0.0025721		1.7	0.976912	1.01265	1.00367	0.99415	1.01921	0.996443	1.00059	1.00052	0.00516605		1.7	1.02256	0.994376	1.01999	1.00234	1.0003	1.00791	0.00562407		1.7	1.01303	1.0064	0.981369	1.00596	1.00596	0.997489	1.0017	0.00453821		1.7	0.99617	0.991776	0.995968	0.984921	0.977189		0.989205	0.00363039
1.73333	0.982722	1.00487	0.982129	1.00946	0.992016	1.0071		0.996383	0.00505566		1.73333	0.984786	1.00759	0.989546	0.99902	1.01898		1.00505	1.00083	0.00510175		1.73333	1.00934	0.989673	1.02687	1.01519	1.00416	1.00905	0.00614397		1.73333	1.00789	1.00713	0.999765	1.00677	1.00549	0.992972	1.00333	0.0023919		1.73333	0.985408	0.99086	1.00281	0.989127	1.0033	1.01249	0.997331	0.00426863
1.76667	0.977524	1.00135	0.988742	0.996502		1.01249		0.995322	0.0058849		1.76667	1.00418	1.00085	0.988836	0.986869	1.00864	1.00105	1.00814	0.999794	0.00329831		1.76667	1.01585	0.990744	1.01755	1.01774	0.988061	1.00599	0.00679274		1.76667	1.00883	1.00252	1.01258	1.01206	1.00053	1.00756	1.00735	0.002014		1.76667	0.997959	0.987185	1.00064	0.991913	1.0019	1.00866	0.998043	0.00310779
1.8	0.990386	0.982743	1.00303	1.00679	0.998868	1.01674		0.999759	0.00492136		1.8	1.01547	1.00756	0.997415	0.998379	1.01982		1.01321	1.00864	0.00376339		1.8	1.01118	0.988108	1.01718	1.01294		1.00735	0.0065373		1.8	1.01518	1.00329	1.01851	1.01926	1.00238	0.99763	1.00937	0.00382452		1.8	1.00091	0.99916	1.00909	0.995796	0.998281	1.0108	1.00234	0.00250772
1.83333	0.989459	0.988664	0.99501	1.01743	1.01231	1.02261		1.00425	0.00611768		1.83333	1.00707	1.0123	0.99557	1.01225	1.01358	0.997828	1.00988	1.00693	0.00276875		1.83333	1.00727	0.984328	1.01287	1.01954		1.006	0.00764824		1.83333	1.01125	1.00058	1.00633	1.01366	1.00688	1.00934	1.00801	0.0018578		1.83333	0.99032	0.99994	1.01602	0.986229	1.0034	1.01045	1.00106	0.00466929
1.86667	1.00449	0.986278	0.994813	1.0091	1.01176	1.01696		1.0039	0.00466495		1.86667	1.00222	1.01277	0.987238	1.00342	1.02891	1.00668	1.01347	1.00781	0.00482283		1.86667	1.0101	0.989505	1.02734	1.02326		1.01255	0.00851739		1.86667	1.01209	1.01128	0.995685	1.00431	1.00538	1.00013	1.00481	0.00258685		1.86667	0.993317	1.00263	1.01298	0.995524	1.00924	1.01424	1.00466	0.00364375
1.9	1.0109	0.977999	0.989381	1.01118	1.01563	1.0307		1.00596	0.00777579		1.9	1.00637	1.00941	0.994508	0.982394	1.01473	1.00644	1.01362	1.00393	0.0043791		1.9	1.02513	0.985861	1.02267	1.01528		1.01223	0.00903707		1.9	1.00926	1.00783	0.990543	1.01452	1.00211	1.00003	1.00405	0.00343196		1.9	0.993299	1.0075	1.01513	0.991126	1.01107		1.00362	0.00482471
1.93333	1.00332	0.984378	0.960451	1.01696		1.01065		0.995151	0.0102537		1.93333	0.996639	1.00347	0.995006	0.98758	1.0181	1.00918	1.01209	1.00315	0.00405688		1.93333	1.01647	0.978002	1.02267	1.01152		1.00717	0.00998504		1.93333	1.0089	1.00226	0.965386	1.01454	1.00926	0.996001	0.999392	0.00728786		1.93333	0.993575	1.01361	1.00883	0.993778	1.00482	1.00341	1.003	0.00328572
1.96667	0.998892	0.976549	0.975968	1.02211	1.00317	1.01204		0.99812	0.00764036		1.96667	0.992764	1.00411	0.995735	0.996144	1.01049		1.02085	1.00335	0.00439584		1.96667	1.0144	0.989077	1.02415	1.01147		1.00978	0.00741255		1.96667	1.00786	0.998991	0.994713	1.00671	1.00637	0.998089	1.00212	0.00225799		1.96667	0.975059	1.00716	1.01562	1.00858	1.01164	1.00886	1.00449	0.00601145
2	1.00088	0.98534	0.978586	1.01742	1.0092	1.00637		0.999632	0.00606096		2	1.00457	1.00289	0.996411	0.993205	1.02999		1.01915	1.0077	0.00576877		2	1.01273	0.968144	1.01435	1.01523		1.00261	0.0115018		2	1.0056	0.998017	0.991543	1.00672	1.00828	1.00382	1.00233	0.00259867		2	0.995734	1.00776	1.01494	1.008	1.00067	1.01403	1.00685	0.00305991
2.03333	1.00288	0.991222	0.965453	1.02253	1.01321	1.00944		1.00079	0.00825944		2.03333	0.995686	0.999769	0.99276	0.995409	1.02498	1.0037	1.00817	1.00292	0.00418823		2.03333	0.996757	0.978549	1.01872	1.01499		1.00226	0.0092451		2.03333	1.01156	1.00384	0.999061	1.00207	1.00286	0.995602	1.0025	0.00218754		2.03333	0.990323	1.00978	1.02149	1.01	0.998223	1.00631	1.00602	0.00438454
2.06667	0.998476	0.988453	0.963816	1.01487	1.01431	1.0104		0.998387	0.00808968		2.06667	1.00462	1.00915	0.988107	0.998877	1.00133		1.01648	1.00309	0.00393143		2.06667	1.01532	0.979549	1.00475	1.01477		1.0036	0.00837553		2.06667	1.01123	0.9952	0.995909	0.999515	1.00132	0.994528	0.999617	0.00256177		2.06667	0.9803	1.01508	1.01395	0.999106	0.996207		1.00093	0.00640743
2.1	0.981997	0.984401	0.954237	1.00358	1.01597	0.986215		0.987733	0.00859603		2.1	1.00916	1.00331	0.99323	0.997471	1.01602	1.0022	1.01024	1.00452	0.00296993		2.1	1.00336	0.978636	1.01315	1.01646		1.0029	0.00855381		2.1	1.01035	1.0035	1.00981	0.998774	1.00625	0.997757	1.00441	0.00219613		2.1	0.969738	1.01707	1.01447	1.01057	0.996242	0.99916	1.00121	0.00715174
2.13333	0.983773	0.984019	0.949271	1.00142	1.02793	1.01275		0.993193	0.0111934		2.13333	0.993393	1.00653	0.993624	0.981951	1.02427	1.0025	1.02052	1.00325	0.00576258		2.13333	1.00627	0.969454	1.02463	1.01375		1.00353	0.0119665		2.13333	0.997981	1.0015	1.01142	0.994876	0.996489	0.994088	0.999393	0.00263353		2.13333	0.977104	1.00556	1.02108	0.995467	1.0021	1.00551	1.00114	0.00590784
2.16667	0.99209	0.981359	0.967426	1.00291	1.02266	1.00289		0.99489	0.00784194		2.16667	0.990513	1.00906	0.991557	1.00003	1.02397	1.00288	1.01327	1.00447	0.00453142		2.16667	1.02176	0.968274	1.01619	1.00915		1.00384	0.0121335		2.16667	1.00713	0.998205	0.996436	1.00686	1.00108	0.998552	1.00138	0.0018773		2.16667	0.984151	1.00508	0.996049	0.996047	1.00447	1.00032	0.997685	0.00314157
2.2	0.991892	0.976531	0.965211	1.01174	1.01628	1.00771		0.994894	0.00843159		2.2	0.995471	1.00389	0.983776	0.993118	1.02033	1.00166	1.00965	1.00113	0.00448963		2.2	1.02103	0.97276	1.02926	1.01485		1.00948	0.0125892		2.2	0.994058	1.00109	0.966558	1.01001	1.00683	0.994099	0.99544	0.00635525		2.2	0.994407	1.00995	0.987579	1.01147	1.00925	0.990268	1.00049	0.00445324
2.23333	1.0078	0.987527	0.971561	0.999813		1.01149		0.995637	0.00728708		2.23333	1.0087	1.00633	0.989051	0.983934	1.01714	1.00933	0.989918	1.00063	0.0048146		2.23333	1.00949	0.966328	1.03241	1.01304		1.00532	0.0139376		2.23333	0.998994	0.999905	0.998347	0.995594	0.996353	0.992648	0.996973	0.00108875		2.23333	1.00593	1.00604	0.997946	0.992757	0.996864	0.992341	0.998647	0.00248916
2.26667	1.00597	0.990771	0.967917	1.00419	1.02578	0.996706		0.998556	0.00781172		2.26667	0.989205	1.00831	1.0011	1.00142	1.01156	1.00155	0.992286	1.00078	0.00300837		2.26667	0.998191	0.963896	1.02243	1.02331		1.00196	0.0139581		2.26667	0.995458	1.00439	1.00411	0.995718	1.00686	0.960274	0.994468	0.00711027		2.26667	0.984406	1.00181	0.995484	1.00611	0.998043	0.993563	0.99657	0.00304909
2.3	1.01119	0.986867	0.986724	0.998256	1.03573	0.999482		1.00304	0.00752417		2.3	0.983231	1.00273	0.996756	0.999905	1.01236	0.997366	0.988931	0.997326	0.003557		2.3	0.997639	0.968937	1.02804	1.02049		1.00378	0.0132913		2.3	1.00276	1.00685	1.00678	1.00335	1.00465	0.993325	1.00295	0.00204623		2.3	1.00523	1.00261	0.987621	1.00485	1.00273	0.992648	0.999282	0.00299654
2.33333	1.01623	0.989696	0.982976	0.999811	1.02168	1.01583		1.00437	0.00649493		2.33333	0.982438	0.993256	0.997776	0.996286	1.0144	0.99997	0.97953	0.994807	0.00439191		2.33333	1.00263	0.968322	1.01801	1.0274		1.00409	0.0129697		2.33333	0.998615	1.01205	1.00143	0.998231	1.0089	0.991721	1.00183	0.00305561		2.33333	1.01012	1.00765	0.99441	1.00551	1.00407	0.983394	1.00086	0.00412459
2.36667	1.01458	0.988582	0.980502	0.992486	1.0299	1.00348		1.00159	0.00746259		2.36667	0.999948	0.998071	0.998872	0.984048	1.03407	1.00765	0.981725	1.00063	0.00656496		2.36667	1.00411	0.9675	1.00927	1.01845		0.999833	0.0111783		2.36667	0.989069	1.00274	1.00339	1.00695	1.00769	0.988449	0.999716	0.00355396		2.36667	0.995166	0.997445	0.995507	0.994304	0.998072	0.986771	0.994544	0.00165988
2.4	1.00442	0.986809	0.983162	1.00679	1.02818	1.00727		1.00277	0.00664337		2.4	0.987669	0.997528	0.997727	0.983775	1.01916	1.00739	1.00125	0.999213	0.00448655		2.4	1.0112	0.967489	1.02244	1.01852		1.00491	0.0126895		2.4	0.987581	1.00705	1.00852	1.00057	1.01072	0.986885	1.00022	0.00433471		2.4	0.994589	1.00448	0.993326	1.00602	1.00002	0.973863	0.995383	0.00477976
2.43333	1.01599	0.982912	0.981683	1.01118	1.01921	1.01835		1.00489	0.00723549		2.43333	0.998816	1.00144	1.00306	0.962355	1.02046	1.00589	1.01355	1.0008	0.00700791		2.43333	1.01104	0.959886		1.02442		0.998451	0.0196653		2.43333	1.00765	1.00956	0.994831	0.995275	1.01678	0.983539	1.00127	0.00497306		2.43333	0.995312	1.01025	1.0003	0.99806	1.00184	0.985691	0.998574	0.00330044
2.46667	0.994046	0.994826	0.987193	1.00954	1.02672	1.00539		1.00295	0.00579585		2.46667	0.994137	1.00147	0.999664	0.963813	1.01582	1.00774	1.00855	0.998743	0.00639657		2.46667	1.01048	0.96908	1.02231	1.01683		1.00467	0.0121082		2.46667	1.00469	1.00378	0.994241	0.999334	1.01317	0.977136	0.998726	0.00502132		2.46667	0.994041	0.994659	0.992892	0.992032	0.99092	0.984324	0.991478	0.00153291
2.5	1.00648	0.998468	0.998712	1.00977	1.02594	1.00516		1.00742	0.00412539		2.5	0.993174	1.00935	1.00265	0.967207	1.00493	0.990989	1.00548	0.996255	0.00546389		2.5	1.01184	0.961791	1.0156	1.00555		0.998695	0.0124748		2.5	1.00044	1.00473	1.00995	0.997014	1.01605	0.961837	0.998337	0.00780591		2.5	0.994446	1.00766	0.988353	0.995889	0.993156	0.97624	0.992624	0.00419138
2.53333	1.01021	0.991735	0.999059	1.00633	1.01775	1.00879		1.00564	0.00371743		2.53333	0.987878	0.999843	1.00013	0.977152	1.01694	0.982789	1.00356	0.995471	0.00516723		2.53333	1.01208		1.01645	1.00804		1.01219	0.0024275		2.53333	0.989276	1.00852	1.00111	0.995289	1.00491	0.952029	0.991855	0.00844273		2.53333	0.998737	1.00242	1.00258	0.989959	1.00055	0.975698	0.994991	0.00430232
2.56667	1.00558	1.00389	1.01874	1.01067	1.02164	1.01569		1.0127	0.00293109		2.56667	0.995661	1.005	1.00857	0.989105	1.011	0.988218	0.990853	0.998344	0.00365218		2.56667	1.00933		1.02343	1.00244	1.0056	1.0102	0.00462919		2.56667	0.965093	1.00224	1.01646	0.988195	1.01345	0.958765	0.990701	0.00999408		2.56667	0.986755	0.987521	1.00698	1.00417	1.00365	0.969306	0.993064	0.00595556
2.6	0.99981	0.999652	0.997038	1.0062	1.0094	1.01171	0.98609	1.00142	0.00328219		2.6		0.998464	1.01722	0.995246	1.01627	0.993546	0.984942	1.00095	0.00532065		2.6	1.01594	0.959319	1.02263	1.02296	1.00338	1.00485	0.0119214		2.6	0.966297	1.00149	1.01604	0.98871	1.00767	0.955416	0.98927	0.00979586		2.6	0.986407	0.991411	1.00352	0.993034	0.980658	0.966966	0.986999	0.00506842
2.63333	1.00263	1.00183	1.00735	1.00738	1.0236	1.019	0.994106	1.00799	0.00385763		2.63333	0.984607	1.00838	1.01835	0.989513	1.02845	1.00862	0.998382	1.00519	0.00587994		2.63333	1.01269	0.964026	1.0166	1.01356	0.998112	1.001	0.00978023		2.63333	0.977499	1.00381	1.00736	0.989304	1.01524	0.967651	0.993476	0.00755571		2.63333	0.984362	0.984879	0.99456	0.996766	0.993418	0.958525	0.985418	0.00577635
2.66667	1.00861	1.00143	1.00717	0.997507	1.00799	1.01847	1.00949	1.00724	0.0024981		2.66667	0.979919	1.00809	1.01031	0.989908	1.00667	1.00574	0.986641	0.998182	0.00465351		2.66667	1.0177	0.964229	0.99967	1.01008	1.00385	0.999105	0.00923434		2.66667	0.972807	1.00802	1.00351	0.988957	1.01027	0.967235	0.9918	0.00755808		2.66667	0.988363	0.982017	1.00708	1.0145	0.999934	0.976783	0.994779	0.00604058
2.7	0.999441	1.0032	1.0057	1.00283	1.01603	1.02245	1.0067	1.00805	0.00309806		2.7	0.989894	1.01075	1.02111	0.996308	0.992087	1.00316	0.989291	1.00037	0.00453367		2.7	1.01674	0.960042	1.00357	1.0111	1.00699	0.999688	0.0101519		2.7	0.963479	1.0022	0.998237	0.976092	1.02146	0.959033	0.98675	0.00999776		2.7	0.978988	0.991653	1.0065	1.01444	1.00809	0.967309	0.994497	0.00755944
2.73333	1.00874	1.01352	1.00816	1.00959	1.02403	1.02032	0.99397	1.01119	0.00367709		2.73333	0.979566	1.01416	1.01213	0.985533	1.015	1.00196	1.00121	1.00136	0.00532686		2.73333	1.00847	0.961943	1.00313	1.00157	1.0066	0.996343	0.00868639		2.73333	0.973373	0.995141	1.00883	0.991243	1.01985	0.960333	0.991463	0.00897719		2.73333	0.989227	0.983689	1.02344	1.00973	1.00688	0.982549	0.999252	0.00676923
2.76667	1.00709	0.999378	1.01221	1.01462	1.02207	1.00938	1.00876	1.0105	0.00264303		2.76667	0.973704	1.00671	1.01184	0.98335	0.993404	0.991752	1.00071	0.994496	0.00500898		2.76667	1.00794		1.01767	1.02444	0.997536	1.0119	0.00586248		2.76667	0.963933	1.00425	1.01045	0.988894	1.02246	0.96459	0.992429	0.00994301		2.76667	0.985776	0.988889	1.02172	1.00738	0.999854	0.973468	0.996181	0.00699587
2.8	1.00255	1.0115	1.02239	1.01974	1.02466	1.02077	1.02328	1.01784	0.00301984		2.8	0.976178	1.00914	1.01481	0.977285	0.991288	1.01106	0.992462	0.996031	0.00603756		2.8	1.01684	0.958876	1.01127	1.02236		1.00234	0.0146623		2.8	0.948811	1.00371	1.011	0.991367	1.01188	0.953854	0.986771	0.0116194		2.8	0.980724	0.993609	1.01374	1.00999	1.00403	0.990549	0.998774	0.00515633
2.83333	1.01073	1.00725	1.02055	1.02481	1.01987	1.02049	1.00864	1.01605	0.00263702		2.83333	0.965868	1.0065	1.01647	0.976514	1.01409	1.01243	0.997393	0.998466	0.00751748		2.83333	1.01423	0.967119	1.0248	1.02736		1.00838	0.0140429		2.83333	0.967114	0.999793	1.00843	0.994661	1.01425	0.954597	0.989807	0.00969925		2.83333	0.982704	0.981791	1.02204	1.00726	1.00796	0.988597	0.998392	0.00670067
2.86667	0.998299	1.00787	1.00346	1.02768	1.01994	1.01912	1.00697	1.01191	0.00397224		2.86667	0.973182	1.01061	1.02404	0.981539	1.00199	1.00184	1.00609	0.999899	0.00653708		2.86667	1.00526	0.965583	1.00764	1.03003		1.00213	0.0133985		2.86667	0.964079	0.988738	1.01077	0.999975	0.99982	0.956878	0.98671	0.00881846		2.86667	0.989696	0.989837	1.02245	1.00997	1.00524	0.994164	1.00189	0.00533186
2.9	0.997405	1.01671	1.01246	1.02573	1.02589	1.00896	1.00165	1.01269	0.00416894		2.9		1.00211	1.0025	0.977997	0.992365	1.00929	1.01234	0.999433	0.00513035		2.9	1.00495	0.972022	1.01534	1.0244		1.00418	0.0114318		2.9		0.992748		1.00383	1.01057	0.968223	0.993843	0.0092965		2.9	0.98801	0.988731	1.02334	1.00175	1.00844		1.00206	0.00659121
2.93333	1.00257	1.01453	1.00532	1.02805	1.02705	1.0216	1.01249	1.01594	0.00380335		2.93333	0.986019	1.00855	1.01488	0.968981	0.985641	1.00674	1.00269	0.996214	0.00619254		2.93333	1.00312	0.9705	1.01385	1.01652		1.001	0.0105703		2.93333	0.964836	0.998383	1.02096	0.994526	0.985514	0.958934	0.987192	0.00934598		2.93333	0.985002	0.984658	1.02488	0.996205	0.996686		0.997486	0.00732475
2.96667	0.996274	1.02283	1.00652	1.02691	1.02621	1.02389	1.00672	1.01562	0.00461971		2.96667	1.0107	1.01044	1.0073	0.982739	1.00342	1.0146	1.0082	1.00534	0.00398472		2.96667	1.00638	0.978127	0.960481	1.01391		0.989723	0.0124224		2.96667	0.981029	1.0027	1.03105	0.994099	1.00985	0.96136	0.996682	0.00981557		2.96667	0.983645	1.0002	1.02968	0.996051	0.996435	0.998105	1.00069	0.00626491
3	1.00274	1.01131	1.01346	1.03242	1.03349	1.01374	1.01307	1.01718	0.00431966		3	1.00818	1.00713	1.01663	0.983906	0.999973	1.00434	0.991592	1.00168	0.00414971		3	0.993758	0.978502	1.01387	1.00971		0.99896	0.00808041		3	0.984365	1.00017	1.00081	0.987618	1.01054	0.956752	0.990042	0.00771344		3	0.982504	0.999196	1.0162	0.985779	1.003	1.0063	0.998831	0.00520293
3.03333	0.995569	1.02192	1.01097	1.03888	1.02416	1.00503	1.00755	1.01487	0.00545679		3.03333	1.02219	1.0047	1.01627	0.989469	1.00307	0.998729	1.00287	1.00533	0.00411387		3.03333	0.97544	0.985136	1.00721	1.01132		0.994775	0.00863637		3.03333	0.992601	0.999351	1.02566	0.99559	1.01287	0.958345	0.997403	0.00929785		3.03333	0.969075	1.01144	1.03625	0.9987	0.998464	1.00066	1.00243	0.00888889
3.06667	0.997912	1.00718	1.00844	1.02549		1.00637	0.997081	1.00708	0.00418422		3.06667	1.01317	1.01066	1.01302	0.982107	1.0098	1.00992	1.00072	1.00563	0.00422584		3.06667	0.985572		1.01306	1.02508	0.999933	1.00591	0.00850434		3.06667	0.994593	1.00228	1.00436	0.993497	1.01953	0.943964	0.993038	0.01053		3.06667	0.979593	1.01325	1.02925	0.991773	1.00541	0.994212	1.00225	0.00718225
3.1	0.998777	1.01798	1.01701	1.03106	1.03147	1.01794	1.01464	1.01841	0.00417653		3.1	0.970057	1.01041	1.01775	0.984909	1.01925	1.01278	0.997492	1.00181	0.00701173		3.1	0.96494	0.994388	1.0077	1.01346	1.00696	0.99749	0.00871227		3.1	1.00353	1.0008	1.01876	0.996524	1.01282	0.958595	0.998504	0.00864569		3.1	0.966147	1.00807	1.016	0.986002	0.992123	0.986549	0.992482	0.00722743
3.13333	0.987674	1.0154	1.00484	1.02864	1.02097	1.01414		1.01194	0.00582082		3.13333	1.01088	1.0106	1.02325	0.985782	0.996934	0.997713	0.99344	1.00266	0.00483442		3.13333	0.961534	0.98608	0.960507	1.00644	1.00457	0.983826	0.0099683		3.13333	1.00342	1.00461	1.01823	0.99827	1.00667	0.963039	0.999041	0.00768873		3.13333	0.966434	1.01744	1.01918	0.974899	0.998772	0.996588	0.995553	0.00880061
3.16667	0.999057	1.0081	1.00069	1.03318		1.00985		1.01018	0.00611313		3.16667	1.00183	1.00967	1.02035	1.00034	0.988255	1.00744	0.996935	1.00355	0.00386047		3.16667		0.991501	0.994011	1.00558	0.999099	0.997549	0.00311024		3.16667	0.989498	1.00005	1.02594	0.998155	1.0095	0.964355	0.997916	0.00840913		3.16667	0.978567	1.01091	1.00776	0.989849	0.997262	1.00185	0.997701	0.00490244
3.2	0.995795	1.01373	1.00712	1.0347	1.02535	1.00344		1.01335	0.00590227		3.2	1.00393	1.00473	1.01981	0.987474	0.986842	1.01823	0.992491	1.00193	0.00517089		3.2	0.942507	0.999152		0.979068	1.00241	0.980785	0.0137637		3.2	1.00005	0.999116	1.01276	0.992542	1.00539	0.966726	0.996098	0.006491		3.2	0.986983	1.0165	1.02611	0.977074	0.980023	0.998876	0.997594	0.00819429
3.23333	0.996898	1.0148	1.00931	1.02473	1.02107	0.99433		1.01019	0.00509884		3.23333	0.980637	1.02174	1.02247	0.981919	0.994098	1.0135	0.997921	1.00176	0.00668951		3.23333	0.939659	1.00045	0.99967	0.999661	1.00267	0.988422	0.0122032		3.23333	1.00229	0.999936	1.0094	0.988198	0.996001	0.965539	0.993561	0.00629223		3.23333	0.982273	1.01791	1.03239	0.994619	0.961953	1.00087	0.998335	0.010238
3.26667	1.00355	1.01497	1.0014	1.02975		1.02212		1.01436	0.00539714		3.26667	0.969073	1.00331	1.02856	1.00214	1.00327	1.00005	0.998293	1.00067	0.00654304		3.26667		1.00234	0.982888	0.990351	1.00045	0.994007	0.00454532		3.26667	1.00604	1.00349	1.00715	0.993501	1.00462	0.961803	0.996098	0.00714339		3.26667	0.980476	1.01111	1.01889	0.99668	0.964847	0.991684	0.993948	0.00807794
3.3	0.998047	1.00887	1.00678	1.03049	1.02653			1.01414	0.00617187		3.3	0.975368	0.996025	1.02077	0.985534	0.988304	1.00719	0.992943	0.995161	0.00564292		3.3	0.943996	0.996665	1.00855	0.98932	1.00513	0.988733	0.0116756		3.3	1.00193	1.0022	1.01117	1.00062	1.00421	0.964869	0.997501	0.0067036		3.3	0.977564	1.01397	1.01562	0.993733	0.966586	0.997705	0.994196	0.00796124
3.33333	1.0018	1.00604	1.01124	1.02564	1.01695	1.00718		1.01147	0.00352173		3.33333	0.96572	1.00473	1.02783	0.998978	0.973883	1.01344	0.984138	0.995531	0.00837766		3.33333	0.941931	0.997711	1.00823	1.00021	1.00357	0.990331	0.0122276		3.33333	0.993317	1.00131	1.01178	0.994069	1.01525	0.968799	0.99742	0.00679811		3.33333	0.985448	1.01125	1.02024	0.989944	0.984397	0.999234	0.998419	0.00599473
3.36667	1.01135	1.00548	0.993188	1.03179	1.02857	1.01305		1.0139	0.00589452		3.36667	0.975776	1.00142	1.02305	0.993161		0.997312	0.994498	0.997536	0.00623942		3.36667		0.996062	1.00947	0.996375	1.0014	1.00083	0.00312945		3.36667	0.992874	0.993331	0.980476	0.990246	1.02203	0.963127	0.990348	0.00786911		3.36667	0.979373	1.00601	1.01836	0.992542	0.982219	0.990601	0.994852	0.00605509
3.4	1.01035	1.00519	0.995731	1.03384	1.02411	1.00567		1.01248	0.00570441		3.4	0.969089		1.0203	0.99044	0.97494	1.01735	0.992235	0.994059	0.00863446		3.4		0.996668	1.00364	1.01152	1.00395	1.00395	0.0030342		3.4	0.999718	1.00388	0.998242	0.989519	1.0221	0.971562	0.997503	0.00680108		3.4	0.971495	1.00713	1.01428	1.0048	0.973359	0.991528	0.993765	0.00739073
3.43333	1.0069	1.00783	1.01013	1.02727	1.02374	1.00151		1.0129	0.00417532		3.43333	0.982061	1.00744	1.0142	0.993523	0.982011	1.01713	0.991375	0.998248	0.00554319		3.43333	0.94625	1.00154	1.00952	1.00791	1.00084	0.993213	0.0118639		3.43333	1.00405	1.00346	1.00996	0.993143	1.00974	0.970594	0.998491	0.00611137		3.43333	0.979837	1.01174	1.02235	0.989796	0.985336	0.996053	0.997519	0.00668742
3.46667	1.00153	1.00847	0.983592		1.02225	0.996261		1.00242	0.00641449		3.46667	0.969918	1.00414	1.01697	0.984117	0.971873	1.01643	0.995951	0.9942	0.00740713		3.46667	0.968108	0.989241	0.970979	1.0064	1.00486	0.987918	0.00809223		3.46667	1.00589	1.00742	0.996346	0.991152	1.01348	0.978725	0.998835	0.0051885		3.46667	0.991072	1.00519	1.00999	0.996822	0.987405	0.997181	0.997943	0.00345319
3.5	1.00922	1.00454	1.0045	1.00452	1.03013	1.00436		1.00954	0.00418878		3.5	0.972261	1.00241	1.02063	0.98744	0.971293	1.00707	1.00268	0.994825	0.00699022		3.5	0.982278	0.998083	1.02261	0.995032	1.00397	1.0004	0.00659085		3.5	1.00137	0.999384	0.989305	0.980792	1.01289	0.984459	0.9947	0.0049152		3.5	0.993099	1.00917	1.00479	1.0061	0.986155	0.999648	0.999828	0.00357582
3.53333	0.999444	1.00687	1.00218	1.02958	1.02427	0.99719		1.00992	0.00557769		3.53333	0.973859	1.00692	1.01672	0.988983	0.974849	1.0157	0.996942	0.996281	0.00676793		3.53333	0.980477	0.995636	1.01387	0.998877	0.99962	0.997697	0.00532712		3.53333	1.00595	0.993518	1.0049	0.988486	1.0173	0.993561	1.00062	0.0043681		3.53333	0.985021	1.0139	1.01469	1.01148	0.976821	0.983565	0.997579	0.00715855
3.56667	1.01183	1.00224	1	1.03449	1.02468	0.988154		1.01023	0.00696634		3.56667	0.975006	1.00988	1.01119	0.980808	0.998349	1.01196	1.01243	0.999946	0.00600815		3.56667	0.959686	0.989682	1.01861	0.970296	1.00368	0.988391	0.0107237		3.56667	1.01107	1.00181	1.02176	0.987882	1.01637	0.99309	1.00533	0.00545074		3.56667	0.986235	1.00727	1.01788	1.01159	0.986925	1.00125	1.00186	0.00531728
3.6	1.00672	1.00581	1.00965	1.03038	1.0362	1.00836		1.01618	0.00548716		3.6	0.990827	1.00537	1.01708	0.981847	1.00876	1.00725	1.00371	1.00212	0.00448762		3.6	0.956688	1.00211	0.993706	0.969197	1.00593	0.985527	0.00963508		3.6	1.00159	0.998282	0.956276	1.00106	1.01848	0.988506	0.994032	0.00852096		3.6	1.00532	1.01176	1.01736	1.00515	0.989188	0.981384	1.00169	0.00560031
3.63333	1.00565	1.00489	1.00378			0.989926		1.00106	0.00373153		3.63333	0.985328	1.00283	1.01528	0.993646	1.00466	1.00321	1.01056	1.00221	0.00379905		3.63333	0.946549	0.997506	1.02064	0.961089	1.00512	0.98618	0.0139184		3.63333	1.00866	0.996076	1.0226	0.985578	1.02008	0.999692	1.00545	0.00587172		3.63333	1.00462	1.01245	1.00744	1.0016	0.987471	0.988807	1.0004	0.00414629
3.66667	1.0158	1.00586	0.992597	1.03216	1.0209	0.993501		1.01014	0.00641777		3.66667	0.983561	1.00311	1.01934	0.995354	1.02272		1.00027	1.00406	0.00603559		3.66667	0.94134	1.00444	0.965355	0.966139	1.00549	0.976554	0.0124279		3.66667	1.00602	0.999301	1.0194	0.98332	1.01847	0.991972	1.00308	0.00588743		3.66667	0.992127	1.01127	1.00647	1.00258	0.988734	0.994478	0.999275	0.00361294
3.7	1.00982	0.998525	1.01239	1.03911	1.02769	0.986514		1.01234	0.00778123		3.7	0.990301	0.998342	1.00465	0.988737	1.00087	1.00458	1.00803	0.999359	0.00279764		3.7		1.00214	1.00827	0.967379	1.00931	0.996773	0.00992487		3.7	0.998907	0.99277	1.02958	0.987619	1.00861	1.00101	1.00308	0.00605457		3.7	0.993686	1.01611	1.00099	1.00172	0.984608	0.993158	0.998378	0.00436376
3.73333	1.00514	1.01062	1.00802	1.02988		0.982916		1.00732	0.00748586		3.73333	1.00679	1.01552	1.0173	0.995834	1.01558	1.00915	1.0076	1.00968	0.00280999		3.73333	0.952573	1.00235	1.0101	0.965775	1.0087	0.987899	0.0119827		3.73333	0.995799	0.997396	1.00097	0.998152	1.01797	0.996867	1.00119	0.00343089		3.73333	1.00483	1.01519	1.00617	1.00681	0.980258	0.990004	1.00054	0.00524841
3.76667	1.01135	1.01732	0.985968	1.00697	1.0303	0.975546		1.00458	0.00829589		3.76667	1.01373	0.978851	1.00378	1.00575	1.01808	1.00081	0.999199	1.00289	0.00476321		3.76667	0.950967	1.00944	1.01765	0.968833	1.01215	0.991811	0.0133956		3.76667	1.01267	1.00433	1.02231	0.994813	1.00684	0.995205	1.00603	0.0043034		3.76667	0.994352	1.00502	1.01053	1.00931	0.986738	0.994374	1.00005	0.00392464
3.8	1.00146	1.0212	0.999162	1.03321	1.02807	0.975674		1.0098	0.00886778		3.8	1.00255	1.01342	1.01699	0.997408	1.00079	1.00603	1.00567	1.00612	0.00262146		3.8	0.964577	1.00385	1.0111	0.978552	1.0139	0.994395	0.0097184		3.8	1.00561	1.00342	1.02263	0.994626	1.01755	0.996436	1.00671	0.00459926		3.8	0.992557	1.01901	1.00605	1.00157	0.979002	0.99449	0.998781	0.00553263
3.83333	1.00714	1.00831	0.987994	1.01773	1.02934	0.984137		1.00578	0.00704999		3.83333	1.00905	1.01343	1.00413	0.998598	1.01603	1.00761	1.00749	1.00805	0.00217614		3.83333	0.962469	1.01749	1.01585	0.985596	1.01445	0.999171	0.0109052		3.83333	0.996495	1.0068	1.03728	1.00182	1.00751	1.00038	1.00838	0.00601813		3.83333	0.986794	1.00414	1.01098	0.994888	0.981054	0.991112	0.994828	0.0045304
3.86667	1.00062		1.00152	1.03156		0.977718		1.00286	0.011041		3.86667	1.02115	1.01842	1.00876	1.00297	1.01101	1.00344	1.00252	1.00975	0.00286848		3.86667	0.954128	1.01334	1.01286	0.988711	1.00893	0.995593	0.0113084		3.86667	1.01083	1.0072	1.00741	0.99496	1.00954	0.995252	1.0042	0.00292838		3.86667	0.978942	1.00857	1.00069	0.997	0.981483	0.980963	0.991274	0.00508167
3.9	1.01224		1.00915	1.03213	1.02942	0.979026		1.01239	0.00949512		3.9	1.01301	1.02031	1.00483	1.00813	1.01353	1.01272	1.01118	1.01196	0.00182614		3.9	0.954773	1.01672	0.989415	0.994726	1.0113	0.993388	0.010895		3.9	1.00765	1.0092	1.02509	0.990373	1.01927	0.991958	1.00726	0.00573103		3.9	0.970662	1.0043	1.00798	0.992612	0.983403	0.983439	0.9904	0.00575681
3.93333	1.00974		0.98852	1.03566	1.03091	0.993489		1.01166	0.00952903		3.93333	1.01119	1.02078	1.01524	1.00332	1.00287	1.00763	1.00537	1.00948	0.00251508		3.93333	0.966011	1.0088	1.00187	1.00318	1.01831	0.999637	0.00889138		3.93333	1.00124	1.01135	1.02575	0.988923	1.01179	0.996206	1.00588	0.00536135		3.93333	0.978179	1.00366	1.01173	0.992578	0.98547	0.984774	0.992731	0.00519022
3.96667	0.999887		0.995717	1.03517		0.991515		1.00557	0.0100128		3.96667	1.01632	1.0171	1.00697	0.99512	1.01061	1.01114	0.998377	1.00795	0.00319334		3.96667	0.975081	1.00612	1.00594	1.00442	1.01579	1.00147	0.00689855		3.96667	1.00814	1.00562	1.0079	0.977492	1.01107	0.997409	1.00127	0.00511972		3.96667	0.991595	1.00774	1.00671	0.987033	0.991519	0.980775	0.994228	0.00441717
4	1.00904		0.985378	1.0391	1.02049	0.98316		1.00743	0.0106098		4	1.00073	1.01581	1.00863	1.00702	1.01462	1.00909	1.00894	1.00926	0.00188878		4	0.993405	1.01774	1.00992	1.00032	1.01278	1.00683	0.00439679		4	0.998072	1.00022	1.02523	0.985831	1.01396	0.99664	1.00333	0.00571816		4	0.999098	1.00336	1.01294	0.987911	0.991055	0.986034	0.996733	0.00422995
4.03333	1.01738		0.990318	1.03807	1.02421	0.977352		1.00947	0.0111719		4.03333	1.00422	1.01841	1.01032	1.00635	1.00504		1.00157	1.00765	0.00245078		4.03333	0.975621	1.00814	1.01686	0.996974	1.00653	1.00082	0.00704672		4.03333	1.00776	0.99951	1.01911	0.986317	1.01221	0.991278	1.0027	0.00514518		4.03333	0.990465	1.00123	0.995292	0.993706	0.998873	0.979065	0.993105	0.00320689
4.06667	1.00944		0.998191	1.01535	1.02019	0.995217		1.00768	0.00481499		4.06667	0.993763	1.02093	0.998177	1.0016	1.00339	1.00854	0.998279	1.00353	0.00339273		4.06667	0.985932	1.01132	1.00963	1.00071		1.0019	0.00580845		4.06667	1.01564	0.999623	0.994565	0.989433	1.00885	0.997651	1.00096	0.00393355		4.06667	0.978699	1.00563	0.979359	0.994862	0.999159	0.993152	0.99181	0.00440881
4.1	1.00547		0.992298	1.02816	1.02863	0.972645		1.00544	0.0107292		4.1	1.00915	1.01263	1.0125	0.995664	1.01031	1.01463	0.997615	1.0075	0.00288952		4.1	0.980211	1.01493	0.99683	0.999433		0.99785	0.00710834		4.1	1.00455	0.991569	1.03087	0.982586	0.988926	0.995524	0.999004	0.00703487		4.1	0.986133	1.00997	0.994743	0.994016	1.00224	0.994895	0.996999	0.00332777
4.13333	0.999017		0.989442	1.00847	1.02745	0.984717		1.00182	0.00759776		4.13333	1.00294	1.01244	0.996597	0.995727	1.02395	1.01597	0.992412	1.00572	0.00449961		4.13333	0.989165	1.0107	1.00708	0.995388		1.00058	0.0050156		4.13333	1.0083	0.987241	1.01773	0.978507	1.00967	0.997033	0.999747	0.00608246		4.13333	1.00105	1.0094	1.00424	0.98734	1.00383	0.993958	0.999969	0.00326029
4.16667	0.998913		0.978109	1.03172	1.01759	0.995263		1.00432	0.00928664		4.16667	1.01212	1.01343	0.994332	0.988987	1.02692		0.988677	1.00408	0.00641264		4.16667	0.993912	1.01679	0.974962	0.998726		0.996097	0.00859508		4.16667	1.0154	0.986964	1.0163	0.985199	1.00059	1.00083	1.00088	0.00544151		4.16667	0.990516	1.00545	1.00175	0.986812	1.01179	0.987121	0.99724	0.00430412
4.2	0.998825		0.99057	1.03229	1.02496	0.99047		1.00742	0.0088634		4.2	1.01819	1.01268	0.997647	1.01121	1.01396	1.0141	0.989597	1.0082	0.00394727		4.2	0.998984	1.0192	1.00095	0.991743	1.00752	1.00368	0.00462396		4.2	1.00116	0.98715	1.02336	0.976367	0.992374	0.990702	0.995187	0.00652295		4.2	0.992402	1.00368	1.00544	0.990462	1.01106	0.987737	0.998463	0.00387424
4.23333	0.999424		0.991334	1.02983	1.02559	0.987535		1.00674	0.00879927		4.23333	1.01274	1.00795	0.985904	0.995091	1.0147		0.983302	0.999948	0.00560724		4.23333	0.996557	1.01836	0.990365	0.988713	1.00648	1.0001	0.00552746		4.23333	1.01188	0.975941	1.02021	0.981059	1.00451	0.995225	0.998138	0.00709333		4.23333	0.996854	1.00785	0.998402	0.992534	1.00763	0.984288	0.997927	0.00369306
4.26667	0.997173		0.981905	1.03391	1.02123	0.988934		1.00463	0.00987708		4.26667	1.01366	1.01812	1.00068	1.00614	1.00865	1.01406	0.977717	1.00558	0.00512844		4.26667	0.988217	1.0195	0.989672	0.993415	0.998667	0.997894	0.00569534		4.26667	1.00088	0.977286	1.02603	0.983997	0.995425	0.994649	0.996378	0.0068834		4.26667	0.990639	1.00633	0.964543	0.997776	1.01508	0.992548	0.994485	0.00704781
4.3	0.991967		0.984702	1.03774	1.01379	0.984228		1.00249	0.0103222		4.3	1.01035	1.01518	0.985849	1.00625	1.02601	1.01458	0.973953	1.0046	0.006895		4.3	0.984267	1.01447	1.00112	0.996563	1.0004	0.999363	0.00483755		4.3	1.00687	0.979222	1.02561	0.98827	1.01416	0.991178	1.00089	0.00717919		4.3	0.995811	1.01039	0.996544	0.980598	1.01077	0.98345	0.996261	0.0052281
4.33333	0.998665	1.019	0.965097	1.01709		0.99281		0.998531	0.0097822		4.33333	1.01694	1.01784	0.987314	1.00347	1.02858	1.01845	0.971702	1.00633	0.00764711		4.33333	0.994499	1.01532	1.01508	0.992746	1.00406	1.00434	0.00483347		4.33333	1.01358	0.976796	1.02436	0.991398	1.01965	0.991898	1.00295	0.00772483		4.33333	0.996832	1.00698	0.989758	0.984322	1.00502	0.994014	0.996154	0.00356717
4.36667	0.993196		0.986923	1.03482	1.0181	0.978333		1.00227	0.0104902		4.36667	1.02492	1.02259	0.999174	1.00362	1.02661	1.01844	0.970674	1.00943	0.00760702		4.36667	0.993563	1.01048	0.985389	0.989136		0.994641	0.0055362		4.36667	1.01294	0.975467	0.988663	0.990044	1.02573	0.989978	0.997137	0.00755035		4.36667	1.00245	1.00433	0.996984	0.984852	1.00695	0.985487	0.996843	0.00392626
4.4	0.987291		0.988704	1.01512	1.01598	0.991997		0.999818	0.006469		4.4	1.02254	1.02456	0.991095	0.998613	1.03514		0.965257	1.0062	0.0106514		4.4	0.990487	1.00978	0.985405	0.998254		0.995981	0.00530416		4.4	1.00691	0.978708	1.01318	0.994031	1.02561	0.989377	1.0013	0.0069977		4.4	0.991729	1.00809	0.983451	0.969355	1.00172	0.988726	0.990512	0.00558821
4.43333	0.977243		0.992126	1.0374	1.02105	0.987706		1.00311	0.011236		4.43333	1.01087	1.02506	0.98369	0.992953	1.01609	1.00971	0.956524	0.999271	0.00886601		4.43333	0.985592	1.00547	0.992179	0.989889		0.993281	0.00428478		4.43333	1.01687	0.974856	0.998816	0.988031	1.00448	0.991685	0.99579	0.00590042		4.43333	1.01429	1.00795	0.992142	0.981799	1.00401	0.992561	0.998793	0.00490981
4.46667	0.996084		0.982714	1.03467	1.02821	0.990483		1.00643	0.010478		4.46667	1.00765	1.02085	0.978073	0.994101	1.02563	1.02237	0.962349	1.00157	0.00921493		4.46667	0.985922	1.00828	1.0021	0.991133		0.996858	0.00508515		4.46667	1.01074	0.96917	1.00693	0.964871	1.02147	0.993173	0.994392	0.00942834		4.46667	1.0116	1.00724	0.993568	0.981998	1.00416	0.984533	0.997185	0.00503827
4.5	0.972224		0.987982	1.03337	1.03092	0.98222		1.00134	0.0128304		4.5	1.01192	1.0296	0.980923	0.988769	1.00701	1.02173		1.00666	0.00766767		4.5	0.981425	1.00507	0.987811	0.993234		0.991884	0.00501357		4.5	1.00154	0.966766	1.01757	0.977117	1.01554	0.990729	0.994877	0.00838501		4.5	1.0058	1.01504	0.990308	0.987718	0.99338	0.990087	0.997055	0.00445218
4.53333	0.976682		0.983252	1.03909		0.985376		0.996101	0.0144501		4.53333	1.00534	1.03167	0.99434	0.97302	1.02567	1.01405	0.9558	0.999984	0.0104667		4.53333	0.985913	1.01299	0.977973	0.996517		0.993348	0.00756929		4.53333	0.999321	0.970764	0.989021	0.96909	1.02597	0.988233	0.9904	0.00854609		4.53333	1.00281	1.00903	0.995359	1.0003	0.999436	0.984539	0.998578	0.00335767
4.56667	0.991124		0.997141	1.0393	1.02682	0.974651	1.0313	1.01006	0.010593		4.56667	0.996644	1.04124	0.987596	0.975617	1.02553	1.01952	0.978365	1.0035	0.00960633		4.56667	0.988641	1.01423	0.999995	0.992996		0.998965	0.00559931		4.56667	1.00302	0.980406	1.01938	0.981411	1.00894	0.991595	0.997459	0.00639321		4.56667	1.00738	1.00323	0.968731	0.99866	0.999505	0.987967	0.994245	0.00574665
4.6	0.994417		0.983652	1.0423	1.02539	0.981032	1.03106	1.00964	0.0108002		4.6	0.998432	1.03674	0.98043	0.979489	1.02548	1.01381	0.972287	1.00095	0.00945833		4.6	0.9831	1.01281	0.987381	0.996068	1.00173	0.996218	0.00527186		4.6	0.999339	0.972891	1.01881	0.998439	1.02131	0.990026	1.00014	0.00740529		4.6	1.00474	0.999389	0.973533	0.989593	0.996762	0.9882	0.992036	0.00447538
4.63333	1.00674		0.973563	1.03864	1.01416	0.971389		1.0009	0.0127522		4.63333	1.01003		0.991436	0.992024	1.02099	1.02225	0.981541	1.00305	0.00697234		4.63333	0.973921	1.01616	1.00413	1.00546	0.994684	0.998869	0.00710573		4.63333	1.00519	0.987429	1.01904	0.999929	1.02272	0.997366	1.00528	0.00548723		4.63333	0.999224	1.00158	0.979966	0.992897	0.998666	0.976418	0.991459	0.00437846
4.66667	1.00994		0.98453		1.02294	0.973005		0.997603	0.0114381		4.66667	0.997331	1.04334	0.997484	0.993155	1.02814	1.02336	0.984451	1.00961	0.0082687		4.66667	0.975495	1.01743	0.995451	0.995772	1.0015	0.99713	0.00672257		4.66667	1.00594	0.993779	1.0287	1.00132	1.02401	0.98453	1.00638	0.00700184		4.66667	1.00459	0.999211	0.981605	0.984031	1.00628	0.99325	0.994828	0.00424094
4.7	1.00561		0.970494		1.01984	0.981199	1.03185	1.0018	0.0115054		4.7	0.998491		0.996633	0.999878	1.02032	1.02947	0.992307	1.00618	0.00612342		4.7	0.984026	1.01439	1.00652	0.984385	1.00369	0.998602	0.00613362		4.7	0.991435	0.998567	0.987955	1.00626	1.02349	0.992864	1.00009	0.005361		4.7	1.00166	1.0049	0.96159	0.998957	0.991268	0.979822	0.989699	0.00670815
4.73333	1.00026		0.981478	1.03485	1.02025	0.975024		1.00237	0.0113206		4.73333	0.995006		0.998547	0.990416	1.02306	0.94841	0.989406	0.990808	0.00986167		4.73333	0.977138	1.0092	1.00021	0.98337		0.992478	0.00740257		4.73333	0.997926	0.999186	1.01093	1.00165	1.01932	0.985121	1.00236	0.00479094		4.73333	1.01373	1.00204	0.972861	1.01125	0.997737	0.979825	0.996242	0.00679045
4.76667	1.00574		0.970065	1.04275	1.01513	0.977804		1.0023	0.0131378		4.76667	0.995202	1.03473	1.00217	0.984135	1.03018	1.03332	0.987404	1.00959	0.00848128		4.76667	0.982147	1.01631	0.956255	0.98852		0.985809	0.0123313		4.76667	0.997747	0.994658	1.00647	1.00094	1.0236	0.983821	1.00121	0.00543597		4.76667	1.00777	0.996003	0.969182	1.00526	1.00338	0.984161	0.994294	0.00611217
4.8	1.01157		0.978779	1.0402	1.02038	0.993702		1.00893	0.0106233		4.8	0.970978	1.03982	1.00175	0.979081	1.0225		0.986416	1.00009	0.010892		4.8	0.985052	1.01355	1.00274	0.986837		0.997047	0.00678892		4.8	0.989628	1.00735	1.00432	0.996664	1.01563	0.977455	0.998508	0.00556993		4.8	1.01131	0.992531	0.976957	1.00642	1.00435	0.974816	0.994396	0.00637844
4.83333	0.995273		0.961135	1.0401	1.01452	1.00278		1.00276	0.012886		4.83333	0.993739	1.04289	0.995913	0.958332	1.04236		0.988699	1.00366	0.0135072		4.83333	0.993611	1.01333	0.999007	0.978654		0.996151	0.00716435		4.83333	0.993799	0.979036	0.967198	1.00378	1.0226	0.987948	0.992394	0.00791034		4.83333	1.00899	0.991521	0.971876	0.998503	1.01055	0.984423	0.99431	0.00607048
4.86667	1.00255		0.969031	1.04274	1.01664	0.983351		1.00286	0.0128557		4.86667	0.988164	1.04067	0.997675	0.960777	1.03516		0.997607	1.00334	0.0122645		4.86667	0.986459	1.00374	0.981737	0.982091	0.997607	0.990326	0.00441255		4.86667	0.988041	0.982781	0.985761	1.00486	1.00994	0.993317	0.994117	0.00447821		4.86667	1.00312	0.998486	0.972365	1.00027	1.01013	0.983899	0.994712	0.00568601
4.9	1.01107		0.976933		1.01241	0.999533		0.999988	0.00821044		4.9	1.00823		0.991577	0.967565	1.02494		0.999747	0.998412	0.00948764		4.9	0.98629	1.01294	0.983956	0.984115	0.996166	0.992693	0.00553527		4.9	0.994862	0.982829	1.0002	0.998107	1.01106	0.993641	0.996783	0.0037663		4.9	0.99164	0.9913	0.956659	0.997119	0.993322	0.973983	0.984004	0.00637322
4.93333	1.0032		0.97198		1.01443	0.987626		0.994309	0.00925141		4.93333	1.00486		0.998371	0.973331	1.04007		0.998788	1.00308	0.0107169		4.93333	0.992713	1.01334	0.981797	0.98534	1.00021	0.994679	0.00563757		4.93333	0.99162	0.975807	1.00799	1.00232	1.01252	0.996797	0.997844	0.00536652		4.93333	1.00916	0.983733	0.962795	1.00478	0.994516	0.977902	0.988815	0.00712609
4.96667	1.0189		0.960637	1.03989	1.0026	1.00203		1.00481	0.0130243		4.96667	1.00342	1.04073	1.0025	0.988983	1.02447		0.999852	1.00999	0.00774225		4.96667	1.00554	1.00636	0.987541	0.984388	1.00229	0.997224	0.00467347		4.96667	0.996166	0.979929	1.00034	0.994398	1.01451	0.993584	0.996487	0.0045705		4.96667	0.995305	0.998085	0.966603	0.987029	1.01032	0.960055	0.986234	0.00790453
5	0.999166	0.981235	0.969805	1.04086	0.992616	0.991499		0.995864	0.00993053		5	1.0141	1.03919	0.995844	0.97921	1.02824		1.0074	1.01066	0.00885813		5	0.992594	1.01704	1.00686	0.98021		0.999176	0.00806875		5	0.999269	0.970623	1.00531	1.00657	1.01946	0.990019	0.998544	0.00683313		5	0.999156	1.00089	0.940139	1.00788	1.00369	0.969256	0.986835	0.0109022
5.03333	1.00719		0.962332	1.04392		1.00125		1.00367	0.0167011		5.03333	1.00733	1.03305	0.996963	0.994741	1.03049		0.988617	1.00853	0.00775704		5.03333	1.00384	1.00959	0.996742	0.977934		0.997026	0.00688481		5.03333	0.995046	0.969899	1.00963	1.00911	1.03051	0.996819	1.00184	0.0082201		5.03333	0.979384	1.00534	0.9652	1.00602	1.00706	0.967202	0.988369	0.00819488
5.06667	1.01215		0.966524	1.03607	0.997085	0.973982		0.997162	0.0126772		5.06667	1.01169	1.0153	1.00392	1.00032	1.03078		0.99875	1.01013	0.004898		5.06667	1.00466	1.02189	0.996189	0.958486		0.995307	0.0133877		5.06667	0.992179	0.972036	0.986467	1.0114	1.01547	0.993935	0.995248	0.00657449		5.06667	0.980893	1.00028	0.982496	0.998335	1.00778	0.97971	0.991582	0.00490398
5.1	1.00879		0.979725	1.02898	0.9997	0.992933		1.00203	0.00823987		5.1	0.99513	1.01924	0.999825	0.992409	1.03192		0.997933	1.00608	0.00646395		5.1	0.996987	1.02359	0.999854	0.962694		0.995781	0.0125373		5.1	0.989785	0.980299	1.006	1.01402	1.01511	0.993866	0.999847	0.00574721		5.1	0.974743	0.992316	0.985063	1.00574	1.00377	0.98056	0.990365	0.00512564
5.13333	1.01197		0.964052	1.03172	1.0051	0.987311		1.00003	0.0114649		5.13333	1.00181	1.0201	1.00106	1.00085	1.01442		0.992104	1.00506	0.00418711		5.13333	0.994615	1.02398	0.977698	0.965451		0.990435	0.0126789		5.13333	0.994187	0.980751	1.00541	1.0105	1.01092	0.991286	0.998842	0.00493616		5.13333	0.987994	0.993469	1.00079	1.00755	1.00439	0.972153	0.994392	0.00532459
5.16667	1.01421		0.973692	1.03709	1.00639	0.991454		1.00457	0.0106756		5.16667	1.00325	1.01182	0.999221	1.00585	1.01539		0.994371	1.00498	0.00318656		5.16667	0.991993	1.01895	0.981899	0.993843		0.996672	0.00787682		5.16667	0.994594	0.980363	0.993631	1.01037	1.01896	0.995357	0.998878	0.00558646		5.16667	0.984458	0.990922	0.970551	0.998777	0.995969	0.976606	0.986214	0.00453101
5.2	1.00875		0.982004	1.03767	1.02125	1.0029		1.01051	0.00929073		5.2	0.970859	1.01242	1.00591	1.00343	1.01892		0.987032	0.99976	0.00724746		5.2	0.998013	1.02832	0.984272	0.993144		1.00094	0.00955975		5.2	0.994466	0.986918	0.983852	1.00265	1.00303	1.00103	0.995323	0.00340851		5.2	0.989633	0.992413	1.00496	1.00485	0.999512	0.982622	0.995666	0.00366398
5.23333	1.01112		0.970026	1.04246	1.00951	0.993084		1.00524	0.0118865		5.23333	0.998245	1.00908	1.01016	1.00597	1.01915		0.977364	1.00333	0.0058798		5.23333	1.01002	1.02428	0.992308	0.998675		1.00632	0.00701899		5.23333	0.984672	0.979904	0.9981	1.00722	1.01584	0.998527	0.997377	0.00549614		5.23333	0.98605	0.988267	0.999896	1.00461	1.00834	0.971283	0.993073	0.00565617
5.26667	1.01151		0.966027	1.03821	1.01185	0.945739	1.01795	0.998547	0.0143072		5.26667	1.0085	1.00492	1.01064	1.00459	1.01957		0.972657	1.00348	0.00655388		5.26667	0.998061	1.02675	0.943487	0.996715		0.991254	0.0173637		5.26667	0.977797	0.994643	0.989713	1.00945	1.01833	0.998586	0.998086	0.00586702		5.26667	0.990376	0.986982	0.996684	1.00861	1.00384	0.975965	0.993744	0.0048473
5.3	1.00925		0.962277	1.03196	1.01993	0.995279	1.0088	1.00458	0.00983308		5.3	1.00847	1.02191	1.01382	1.0042	1.0244		0.974841	1.00794	0.00732678		5.3	1.00537	1.02387	0.983826	0.988072		1.00028	0.00913895		5.3	0.973894	0.991215	0.981034	1.00023	1.01173	0.994551	0.992109	0.00551435		5.3	0.992344	0.991876	0.99664	1.00859	0.992695	0.964795	0.991157	0.00586865
5.33333	1.00498		0.960923	1.03955	1.00314	1.00789	1.0029	1.00323	0.0102205		5.33333	1.01227	1.01357	1.0103	1.00761	1.0106		0.981631	1.006	0.0049418		5.33333	0.999421	1.03104	0.986584	0.999882		1.00423	0.00945173		5.33333	0.982738	0.982909	0.977152	0.994344	1.01341	1.00215	0.992117	0.00564455		5.33333	0.988588	0.990729	1.00206	1.01513	0.98555	0.967619	0.991612	0.00654354
5.36667	1.00174		0.966309	1.03378	1.0037	1.01052	1.01034	1.0044	0.00893362		5.36667	1.00435	1.01018	1.01433	1.0116	1.02188		0.97142	1.00563	0.00723013		5.36667	1.00668	1.02827	1.00243	0.999304		1.00917	0.00654266		5.36667	0.978654	0.989618	0.991252	0.999594	1.01108	1.00101	0.995201	0.00456688		5.36667	0.991036	0.996242	1.00061	1.00773	0.990425	0.967301	0.992225	0.00563555
5.4	0.998683		0.965581	1.02545	0.984654	0.994703	1.01042	0.996582	0.00843833		5.4	0.991445	1.00149	1.02121	0.999878	1.01108		0.969375	0.999079	0.00725863		5.4	0.976431	1.02364	0.950537	0.991157		0.985441	0.0152513		5.4	0.990432	0.99082	0.987867	0.987882	1.00672	0.997642	0.993561	0.00301018		5.4	1.01095	0.99958	1.00102	1.01346	0.993872	0.975073	0.998992	0.00564246
5.43333	1.00084		0.966059	1.02547	0.979983	0.995921	1.00096	0.994872	0.00829017		5.43333	0.99109	1.00306	1.01782	1.00008	1.00358		0.964248	0.996648	0.00737134		5.43333	0.964914	1.02048	0.968105	0.984337		0.98446	0.0127383		5.43333	0.974906	0.999024	0.994655	0.987041	1.01257	0.990834	0.993171	0.00512959		5.43333	0.996194	0.997378	1.00721	1.01689	0.99476	0.957862	0.995049	0.00819466
5.46667	0.993479		0.931544	1.01621	0.964668	0.986072	1.00887	0.983474	0.0127463		5.46667	0.980066	0.997562	1.00647	0.984047	0.995384		0.942727	0.984376	0.0091953		5.46667	0.99248	1.02384	0.955596	0.980115		0.988007	0.0141909		5.46667	0.966384	1.00234	0.987046	0.992548	1.01063	0.994344	0.992215	0.0061648		5.46667	0.985805	0.999467	0.97098	1.01335	0.994246	0.981937	0.990964	0.0060324
5.5	0.980189		0.936743	1.02919	0.96833	0.958629	1.00766	0.980124	0.013722		5.5	0.92749	1.01154	0.998538	0.973549	0.985482		0.950638	0.97454	0.0127161		5.5	0.990986	1.02161	0.940401	0.978103		0.982774	0.0168142		5.5	0.980615	1.00536	0.992135	0.993939	1.01077	0.989244	0.995345	0.00449012		5.5	1.00058	0.999554	0.992308	1.02433	0.996379	0.969482	0.997105	0.00717808
5.53333	0.973959		0.934204	1.01519	0.951868	0.947847	1.00433	0.971234	0.0133276		5.53333	0.966355	1.00574	1.00137	0.978832	0.973186		0.944667	0.978358	0.00928311		5.53333	0.98357	1.01648	0.947121	0.972768		0.979985	0.0143667		5.53333	0.974752	1.00736	0.99391	0.991888	1.00999	0.981071	0.993162	0.0056926		5.53333	0.996874	1.00746	0.994469	1.02451	1.00055	0.981659	1.00092	0.00585488
5.56667	0.965351		0.935295	1.01659	0.950166	0.946498	1.0031	0.969499	0.013461		5.56667	0.959733	1.0013	0.995002	0.964709	0.974313		0.945423	0.973414	0.00873897		5.56667	0.978126	1.02177	0.951366	0.974451		0.981427	0.0146924		5.56667	0.974875	1.00116	1.00488	0.996313	1.0078	0.990848	0.99598	0.00489124		5.56667	0.998221	1.008	0.961782	1.00827	0.99999	0.970289	0.991092	0.00817085
5.6	0.949497		0.924796	1.01688	0.947714	0.951944	1.00809	0.966488	0.0151237		5.6	0.959454	0.996996	0.994711	0.960264	0.961823		0.949543	0.970465	0.00822486		5.6	0.977763	1.02195	0.958163	0.971817		0.982424	0.0138		5.6	0.995611	1.00494	0.989549	0.992579	1.01367	0.984861	0.996869	0.00434071		5.6	0.990145	0.998478	0.98302	1.01352	0.995374	0.979402	0.993323	0.00499565
5.63333	0.951669		0.930846	1.01184	0.932449	0.943556	1.00053	0.961815	0.0144441		5.63333	0.950957	0.995918	0.99507	0.952521	0.960522		0.944794	0.96663	0.00935503		5.63333	0.977025	1.01472	0.954474	0.982182		0.982101	0.0124266		5.63333	1.00985	1.01113	1.02648	0.998306	1.00566	0.983359	1.0058	0.00586639		5.63333	0.990727	0.998283	0.976716	1.02052	0.990252	0.977553	0.992342	0.00658064
5.66667	0.958209		0.913862	1.00645	0.931384	0.931941	1.01059	0.958738	0.0167775		5.66667	0.965588	0.998898	0.991919	0.953263	0.955287		0.940681	0.967606	0.00941062		5.66667	0.974215	1.02727	0.929913	0.968595		0.974998	0.020014		5.66667	1.01036	1.01394	0.992128	0.993785	1.00321	0.995322	1.00146	0.00374863		5.66667	0.978234	1.00226	0.985005	1.02304	0.985788	0.979601	0.992322	0.00706901
5.7	0.962006		0.915707	1.0009	0.925423	0.952994	1.01	0.961172	0.0156793		5.7	0.95915	0.994114	0.985974	0.958853	0.962782	0.99763	0.932572	0.970153	0.00885713		5.7	0.976302	1.02343	0.926101	0.971225		0.974266	0.019897		5.7	1.01644	1.00756	0.985357	0.998795	1.01154	0.987169	1.00114	0.00527021		5.7	0.991577	1.00303	0.999485	1.00838	0.980877	0.96957	0.992153	0.00597995
5.73333	0.946568	0.950786	0.918053	1.00287	0.909945	0.969955	1.01218	0.958622	0.0147812		5.73333	0.952261	0.986786	0.986591	0.956717	0.945744		0.930623	0.959787	0.00923974		5.73333	0.970904	1.02245	0.953082	0.961814		0.977062	0.0155601		5.73333	1.02236	1.01077	1.00648	0.913138	1.00649	0.992938	0.992029	0.0162414		5.73333	1.00522	0.991073	0.993377	1.00037	0.994269	0.98346	0.994628	0.00307786
5.76667	0.955641		0.907577	0.999854	0.92903	0.957602	1.01063	0.960056	0.0162111		5.76667	0.954171	0.992264	0.982825	0.952505	0.940925	1.00226	0.941128	0.966582	0.00957985		5.76667	0.974925	1.01973	0.936712	0.960748		0.973028	0.01745		5.76667	1.01867	1.01828	1.00475	1.00027	1.0042	0.990548	1.00612	0.00442635		5.76667	0.997244	1.00075	0.986775	1.01513	0.99254	0.971223	0.993944	0.00598826
5.8	0.965448	0.959483	0.910234	0.997651	0.916394	0.955363	1.00837	0.958993	0.0139558		5.8	0.938194	0.985053	0.969479	0.948792	0.968518	0.991956	0.942815	0.963544	0.00789777		5.8	0.98357	1.02007	0.953466	0.960679		0.979447	0.0149853		5.8	1.00908	1.01551	1.0076	0.999585	1.01484	0.993743	1.00673	0.00350659		5.8	0.995737	0.985658	0.980784	0.995916	0.992445	0.982146	0.988781	0.00277156
5.83333	0.951643		0.905894	0.99919	0.922052	0.948204	1.01714	0.957354	0.01764		5.83333	0.938323	0.986126	0.961666	0.947689	0.955266	0.996372	0.947382	0.961832	0.00814714		5.83333	0.97905	1.0284	0.941226	0.958748		0.976857	0.01884		5.83333	0.996686	1.01332	1.00589	0.993884	1.001	0.988351	0.999855	0.0036381		5.83333	0.991615	1.00271	0.99297	0.998604	0.996046	0.973333	0.992547	0.00417349
5.86667	0.952822		0.917996	0.995563	0.913165	0.968184	1.01926	0.961164	0.0171699		5.86667	0.942422	0.990784	0.961203	0.946936	0.939188	1.01021	0.938381	0.961304	0.0107335		5.86667	0.983209	1.02417	0.934289	0.959936		0.975401	0.0190799		5.86667	0.988611	1.0139		0.999538	1.00272	0.998181	1.00059	0.00407419		5.86667	0.99068	0.998019	0.991723	1.00596	1.00109	0.983947	0.995236	0.00325341
5.9	0.958258	0.957967	0.91451	0.996304	0.915696	0.94188	1.02191	0.958074	0.0150334		5.9	0.951862	0.987548	0.976037	0.946262	0.951648	0.998243	0.93507	0.96381	0.00889516		5.9	0.983579	1.01738	0.942155	0.957121		0.975059	0.0165033		5.9	1.00499	1.00508	1.0259	1.0007	1.00216	0.984738	1.00393	0.00537598		5.9	0.999269	0.982116	1.00128	0.996685	1.00549	0.978288	0.993853	0.00450122
5.93333	0.947582		0.907398	0.996547	0.911599	0.954837	1.02374	0.956951	0.0188271		5.93333	0.944357	0.987526	0.971744	0.954001	0.931607	0.987693	0.93048	0.958201	0.00925583		5.93333		1.0158	0.92838	0.967165	1.00502	0.979092	0.0198617		5.93333	0.990886	1.00902	0.986211	1.00648	1.0105	0.988046	0.998523	0.00460625		5.93333	1.00002	0.995407	1.00433	0.990453	0.998959	0.98159	0.995127	0.00330917
5.96667	0.949928		0.90523	0.991779	0.908489	0.967042	1.03051	0.95883	0.0198135		5.96667	0.944497	0.990673	0.962244	0.942083	0.949711	0.990117	0.936367	0.959385	0.00855796		5.96667	0.98324	1.01812	0.943126	0.952175	1.00406	0.980144	0.0144503		5.96667	0.994095	1.00735	0.931907	1.01304	1.01143	0.991574	0.991566	0.0124772		5.96667	0.993846	0.989181	0.996808	1.00285	1.01018	0.970617	0.993913	0.00553123
6	0.955436		0.91754	0.995345	0.921292	0.95618		0.949159	0.0141389		6	0.949581	0.974483	0.972609	0.954496	0.942694	0.99389	0.93781	0.960795	0.00762765		6	0.982457	1.02742	0.932261	0.963219	0.995695	0.980211	0.0159087		6	1.00996	1.00754	1.00475	0.988877	1.00203	0.991808	1.00083	0.0035094		6	0.992413	0.986174	0.997156	0.989495	1.00835	0.963661	0.989541	0.00605816
6.03333	0.949276		0.909852	0.983019	0.925832	0.962485		0.946093	0.0129736		6.03333	0.933901	0.978504	0.972272	0.963236	0.947049	0.988399	0.938811	0.96031	0.00787872		6.03333	0.976219	1.0271	0.937542	0.957348		0.974553	0.0192142		6.03333	0.988785	1.01258	0.999659	1.0123	0.997067	1.00853	1.00315	0.003903		6.03333	0.985876	0.991829	1.00902	0.982261	1.00358	0.979721	0.992048	0.00485404
6.06667	0.942902		0.908975	0.990216	0.903734	0.952662		0.939698	0.0157602		6.06667	0.950609	0.983099	0.971652	0.964282	0.918236	1.01232	0.931483	0.961668	0.0120027		6.06667	0.98116	1.01806	0.931941	0.948926		0.970022	0.0189888		6.06667	1.00929	1.00781	1.0204	1.01138	1.01163	1.00483	1.01089	0.00216065		6.06667	0.986818	0.984915	0.997336	0.981561	1.00279	0.961125	0.985757	0.00591687
6.1	0.956182		0.911997	0.988354	0.911609	0.935141		0.940657	0.0145114		6.1	0.943676	0.959183	0.972921	0.960772	0.946853	0.984604	0.939465	0.95821	0.00619556		6.1	0.978334	1.01752	0.943176	0.952323		0.972839	0.0166523		6.1	1.00911	1.00536	0.971424	1.01515	1.01924	1.00221	1.00375	0.0069487		6.1	1.01563	0.985355	0.991868	0.989109	1.00442	0.963248	0.991605	0.00728222
6.13333	0.950059	0.979192	0.901152	0.986625	0.903354	0.947349		0.944622	0.01482		6.13333	0.943233	0.958722	0.972636	0.957977	0.943435	0.999195	0.932361	0.958223	0.00845008		6.13333	0.971227	1.02428	0.935166	0.961142		0.972955	0.0187199		6.13333	1.00636	1.00483	1.00578	1.01678	1.02335	1.00275	1.00998	0.0033393		6.13333	0.996906	0.991522	0.986074	0.994263	1.00827	0.969541	0.991096	0.00525563
6.16667	0.958844	0.954297	0.903829	0.987157	0.905048	0.940737		0.941652	0.0132885		6.16667	0.946113	0.977921	0.968077	0.959179	0.924328	0.993125	0.938526	0.958181	0.00898109		6.16667	0.953969	1.02561	0.941762	0.970202		0.972887	0.018516		6.16667	1.01146	1.00004	1.00527	1.01123	1.01568	0.994789	1.00641	0.00322317		6.16667	1.00591	0.991307	1.00251	0.983122	1.00474	0.957533	0.990854	0.00758444
6.2	0.965622	0.982122	0.906843	0.989784	0.911872	0.939794		0.94934	0.0144642		6.2	0.943373	0.984103	0.970422	0.957988	0.924591	1.00391	0.938465	0.960408	0.0104824		6.2	0.967835	1.02612	0.941986	0.9761		0.97801	0.0176054		6.2	1.02175	0.999021	0.999601	1.02384	1.01794	0.997301	1.00991	0.00510782		6.2	1.01655	0.994786	0.993558	0.980133	1.01084	0.965546	0.993568	0.00773218
6.23333	0.956147	0.978547	0.89195	0.986676	0.907991	0.927695		0.941501	0.0157019		6.23333	0.942104	0.9931	0.96109	0.955495	0.916796	1.00172	0.93222	0.957504	0.011724		6.23333	0.975109	1.02406	0.95453	0.992551		0.986562	0.014717		6.23333	1.01513	1.00405	1.0046	1.00852	1.00924	1.00034	1.00698	0.00209961		6.23333	1.00282	0.994648	0.987917	0.987439	1.0149	0.961457	0.99153	0.00734267
6.26667	0.954274	0.982319	0.884744	0.981073	0.918747	0.946335		0.944582	0.0153849		6.26667	0.931062	0.952469	0.973647	0.954587	0.924539	0.999754	0.934497	0.952936	0.0100578		6.26667	0.967984	1.02676	0.954324	0.992333		0.985351	0.0158852		6.26667	1.02775	1.00235	0.996404	1.01754	1.0217	1.00327	1.0115	0.00511218		6.26667	1.01093	0.990396	0.982842	0.998576	1.01786	0.950176	0.991797	0.00984187
6.3	0.9677	0.983845	0.896895	0.987699	0.913918	0.923857		0.945652	0.0158871		6.3	0.938732	0.989936	0.96708	0.953772	0.917438	1.00991	0.931791	0.95838	0.0124574		6.3	0.973743	1.02166	0.952558	0.989918		0.984471	0.0145676		6.3	1.01951	0.996395	1.00486	1.01407	1.01315	1.00121	1.0082	0.0035886		6.3	1.00495	0.983908	0.986721	0.980015	1.02386	0.96956	0.991503	0.00800444
6.33333	0.97043	0.996341	0.901217	0.987201	0.932149	0.944126		0.955244	0.0147386		6.33333	0.935663	0.98397	0.967282	0.9469	0.916626	1.00516	0.928755	0.954908	0.0120585		6.33333	0.973171	1.009	0.960168	0.992806		0.983785	0.0107524		6.33333	0.999997	0.999839	1.00252	1.01481	1.01973	0.997806	1.00578	0.00373731		6.33333	1.01074	0.984367	0.990068	0.978567	1.01034	0.972059	0.991024	0.00663826
6.36667	0.956781	0.993178	0.900162	0.984102	0.921022	0.951991		0.951206	0.0145968		6.36667	0.943718	0.985373	0.95847	0.937763	0.91075	1.0108	0.932799	0.95424	0.0128359		6.36667	0.975532	1.02123	0.953072	0.997653		0.986872	0.0146285		6.36667	1.00599	0.99672	0.994711	1.01873	1.02996	0.998714	1.00747	0.00574455		6.36667	1.01308	0.982638	0.984924	0.994472	1.02458	0.978724	0.996403	0.00754886
6.4	0.949387	0.98813	0.901594	0.981468	0.937401	0.945471		0.950575	0.0128647		6.4	0.95463	0.990411	0.969867	0.953908	0.905814	0.997953	0.935134	0.958245	0.0120134		6.4	0.974533	1.01627	0.941979	0.998749		0.982882	0.0160962		6.4	1.00252	0.998884	0.993839	1.01711	1.03139	1.00391	1.00794	0.00565751		6.4	1.00654	0.985197	0.991055	1.0011	1.02203	0.967135	0.995509	0.00771929
6.43333	0.958923	0.99135	0.888248	0.982384	0.931652	0.933249		0.947634	0.0155297		6.43333	0.946255	0.980638	0.967081	0.950297	0.947231	1.01086	0.929139	0.961642	0.0102841		6.43333	0.973314	1.02152	0.93624	1.00126		0.983085	0.0184794		6.43333	0.999499	0.997979	0.996616	1.00315	1.03334	1.00935	1.00665	0.0056535		6.43333	0.993724	0.98388	0.987062	0.998591	1.01764	0.971822	0.99212	0.00632801
6.46667	0.963207	0.990751	0.903866	0.984214	0.939784	0.934618		0.95274	0.0134536		6.46667	0.956023	0.988671	0.974778	0.950966	0.947507	1.00087	0.937596	0.965202	0.00883332		6.46667	0.981487	1.02509	0.956949	0.999424		0.990737	0.0143839		6.46667	1.005	0.987033	1.00851	0.994472	1.02567	1.00634	1.0045	0.00539674		6.46667	0.995435	0.999456	0.97771	0.978311	1.01766	0.970185	0.989793	0.0072204
6.5	0.958426	1.00163	0.902428	0.982203	0.935503	0.954958		0.955858	0.014219		6.5	0.953259	0.969685	0.975437	0.954357	0.943608	1.00705	0.941094	0.963499	0.00867902		6.5	0.983545	1.02372	0.957949	1.00565		0.992715	0.0142044		6.5	1.00147	0.998595		0.98949	1.02464	1.006	1.00404	0.00581401		6.5	0.993053	0.995443	0.985703	0.993843	1.01812	0.966758	0.992153	0.00677056
6.53333	0.951983	0.987585	0.892627	0.989242	0.937977	0.941817	0.997391	0.956946	0.014115		6.53333	0.954652	0.987195	0.986263	0.952021	0.943247	1.00121	0.937307	0.965986	0.00946799		6.53333	0.981009	1.01176	0.941119	1.0017		0.983898	0.0156307		6.53333	0.990052	1.00137	0.995894	0.9765	1.0165	1.00465	0.997494	0.00555647		6.53333	1.00079	0.994058	0.99066	0.981385	1.02337	0.965704	0.992663	0.00789345
6.56667	0.95137	0.983299	0.896988	0.979663	0.943043	0.948802	1.01118	0.959192	0.0138029		6.56667	0.948544	0.980067	0.984051	0.940986	0.946887	0.999795	0.927292	0.961089	0.0101078		6.56667	0.981164	1.0128	0.958763	0.991326	0.994812	0.987772	0.00887022		6.56667	0.993577	0.99969	0.999039	0.98396	1.02533	1.01012	1.00195	0.00583292		6.56667	1.00442	0.99016	0.986337	0.988733	1.0179	0.971101	0.993108	0.00658425
6.6	0.9598	0.991538	0.894724	0.981391	0.92744	0.958228	1.00983	0.960421	0.0148468		6.6	0.940333	0.997104	0.977874	0.949905	0.956433	0.990243	0.935816	0.963958	0.009242		6.6	0.984014	1.02327	0.965923	0.997117	0.99748	0.993561	0.0093959		6.6	1.00041	1.00818	0.941342	0.995444	1.02239		0.993552	0.0138234		6.6	1.00598	0.996811	0.990853	1.00022	1.0167	0.965903	0.996077	0.00702113
6.63333	0.958558	0.99045	0.883239	0.984887	0.937856	0.967677	1.01782	0.962927	0.0163837		6.63333	0.931163	0.997607	0.981838	0.946122	0.955575	1.00052	0.937954	0.964398	0.0108319		6.63333	0.984378	1.01617	0.954578	0.999265	0.99213	0.989304	0.010147		6.63333	1.00348	1.00155	1.01076	0.990703	1.02842		1.00698	0.00624784		6.63333	1.01383	0.999385	0.997052	0.999022	1.01898	0.95288	0.996858	0.00952663
6.66667	0.967413	0.992651	0.887676	0.986539	0.937386	0.943043	1.01983	0.962077	0.0164785		6.66667	0.942951	0.993602	0.977473	0.946867	0.955928	0.990614	0.937793	0.963604	0.00880138		6.66667	0.987483	1.01868	0.94495	1.00148	0.989048	0.988329	0.0122008		6.66667	1.00668	0.998019	1.00098	0.991108	1.02609		1.00457	0.00593604		6.66667	1.00374	0.997805	0.999133	0.995101	1.00961	0.965307	0.995116	0.00631484
6.7	0.954617	0.981228	0.891767	0.990389	0.944277	0.958577	1.0188	0.962808	0.0152053		6.7	0.932537	0.986991	0.969663	0.940354	0.951261	1.00177	0.938657	0.960177	0.0100461		6.7	0.99468	1.01968	0.953432	1.00841	0.992527	0.993746	0.0112143		6.7	0.991829	0.991841	0.982842	0.982952	1.02543		0.994978	0.00787038		6.7	1.00954	1.00028	0.99696	1.00818	1.01139	0.968328	0.999113	0.00657103
6.73333	0.968481	0.985937	0.902087	0.993469	0.923306	0.948425	1.01463	0.962334	0.0151546		6.73333	0.940772	0.991762	0.970776	0.942066	0.960609	1.00301	0.93519	0.963455	0.00999847		6.73333	0.979393	1.02856	0.953033	0.997484	0.986393	0.988972	0.0123072		6.73333	0.994211	1.0001	0.9872	0.980311	1.02996		0.998356	0.00857019		6.73333	0.998326	0.995989	0.983536	1.00292	1.0135	0.95476	0.991506	0.00835591
6.76667	0.960706	0.983517	0.886491	0.993866	0.934007	0.944556	1.0178	0.960134	0.0164451		6.76667	0.950182	0.979644	0.962518	0.941242	0.96461	0.986511	0.936167	0.960125	0.00712558		6.76667	0.99598	1.02656	0.945892	1.00261	0.983781	0.990964	0.013249		6.76667	0.996335	0.989617	0.982195	0.979067	1.01805		0.993053	0.00693144		6.76667	1.00613	0.99869	0.987966	1.00827	1.0152	0.969387	0.997606	0.00679767
6.8	0.972407	0.99124	0.885765	0.991881	0.940975	0.944155	1.0178	0.96346	0.0165665		6.8	0.950126	0.970781	0.971479	0.939454	0.962749	1.00162	0.930046	0.960894	0.0089965		6.8	0.982995	1.009	0.939778	1.00257	0.985926	0.984053	0.0121039		6.8	0.992846	0.988817	0.990915	0.972693	1.02483		0.994019	0.00849088		6.8	1.00333	0.999312	0.988954	1.01355	1.01122	0.961132	0.996248	0.00789336
6.83333	0.952638	0.983798	0.896578	0.992967	0.931335	0.945684	1.02532	0.961189	0.0161932		6.83333	0.958124	0.983362	0.968738	0.955588	0.959306	0.984622	0.929545	0.962755	0.00711508		6.83333	0.9923	1.02939	0.956652	0.981879	0.977915	0.987628	0.0119439		6.83333	0.98225	0.993415	1.00439	0.971217	1.01894		0.994043	0.00832932		6.83333	1.00047	0.991352	0.980646	0.998676	1.01537	0.960781	0.991215	0.00766477
6.86667	0.958774	0.976557	0.883693	0.989845	0.948353	0.958093	1.0251	0.962917	0.016408		6.86667	0.938679	0.978536	0.970343	0.947638	0.954493	0.996427	0.932601	0.959817	0.00868183		6.86667	0.988675	1.01986	0.937181	0.992198	0.978167	0.983217	0.0134132		6.86667	0.995067	1.00033	1.0009	0.968877	1.01459		0.995952	0.00749886		6.86667	0.99535	0.987015	0.980267	1.00202	1.00596	0.970427	0.990173	0.00552099
6.9	0.956691	0.975239	0.886994	0.991618	0.948641	0.954073		0.952209	0.0145748		6.9	0.934051	0.966865	0.963956	0.953444	0.95876		0.93371	0.951798	0.00596695		6.9	0.990755	1.02072	0.952993	0.993913	0.969779	0.985631	0.0114941		6.9	0.994172	0.993882	0.997039	0.967158	1.01013		0.992477	0.00699445		6.9	1.0018	0.992298	0.993886	1.01298	1.0086	0.966578	0.996024	0.00674432
6.93333	0.97213	0.980955	0.884318	0.987565	0.94155	0.967428		0.955658	0.0156591		6.93333	0.956064	0.967673	0.970202	0.964134	0.963454	0.984631	0.930779	0.96242	0.00622405		6.93333	0.989286	1.02227	0.939576	1.0051	0.972675	0.985781	0.0141839		6.93333	0.989187	0.992275	1.00846	0.97938	1.01333		0.996527	0.00628799		6.93333	1.00862	0.981561	0.981564	1.00169	1.00594	0.966537	0.990987	0.00689137
6.96667	0.968096	0.974292	0.884325	0.985847	0.950611	0.94875		0.951987	0.0147128		6.96667	0.956926	0.976963	0.973178	0.958084	0.959938	0.988972	0.933051	0.963873	0.00678783		6.96667	0.987697	1.02611	0.943965	1.00477	0.958839	0.984276	0.014923		6.96667	0.98806	0.99403	1.0106	0.978233	1.00256		0.994697	0.00561407		6.96667	0.998847	0.986253	0.974632	0.996175	1.01816	0.96989	0.990659	0.00721374
7	0.966069	0.977624	0.889556	0.989343	0.945017	0.949497		0.952851	0.0143748		7	0.96198	0.981369	0.971179	0.956251	0.954387	0.992124	0.917194	0.962069	0.0090835		7	0.988575	1.02453	0.951966	1.0001	0.969017	0.986837	0.012516		7	0.995192	0.988943	1.01629	0.984401	1.00947		0.998859	0.00607141		7	1.00555	0.988577	0.98898	1.00521	1.01909	0.968591	0.995999	0.00722212
7.03333		0.968243	0.885773	0.989431	0.94244	0.961934		0.949564	0.0176229		7.03333	0.961022	0.985704	0.974751	0.952991	0.962097		0.933062	0.961604	0.00740051		7.03333	0.986898	1.0324	0.942194	0.992632	0.958969	0.982618	0.0154755		7.03333	0.986427	0.99911	1.0083	0.99798	1.01764		1.00189	0.00525055		7.03333	1.01087	0.988452	0.983135	0.996194	1.01985	0.960755	0.993209	0.00857876
7.06667	0.971579	0.973598	0.885485	0.985722	0.946101	0.960583		0.953845	0.0147188		7.06667	0.964886	0.989896	0.968636	0.954531	0.954384		0.939895	0.962038	0.0069112		7.06667	0.985207	1.02329	0.961959	0.995949	0.961846	0.985651	0.0115137		7.06667	0.994952	0.990715	1.01144	0.993126	1.02524		1.00309	0.00662861		7.06667	0.998451	0.999345	0.991666	1.00194	1.01912	0.976439	0.997827	0.00568163
7.1	0.962778	0.970691	0.879456	0.985479	0.949976	0.970034		0.953069	0.0154611		7.1	0.976626	0.982909	0.978375	0.954755	0.960411	0.97874	0.929197	0.965859	0.00728053		7.1	0.978382	1.02501	0.950349	0.987376	0.951025	0.978428	0.0137642		7.1	0.987664	0.995217	1.01128	0.980756	1.00475		0.995935	0.00553466		7.1	0.997739	0.99463	0.991263	1.00123	1.00854	0.963825	0.992871	0.00629384
7.13333	0.952829	0.963255	0.895469	0.982776	0.928531	0.956969	1.00093	0.954394	0.013093		7.13333		0.994506	0.971559	0.960812	0.962364		0.924384	0.962725	0.0113178		7.13333	0.97913	1.01748	0.938633	0.981264	0.961121	0.975526	0.0129898		7.13333	0.989885	1.00034	1.01753	0.981512	0.998548		0.997562	0.0060158		7.13333	0.999215	1.0035	0.998426	1.00551	1.00013	0.967862	0.995773	0.00569017
7.16667	0.949921	0.966886	0.889131	0.985907	0.943135	0.972252		0.951205	0.0139201		7.16667		0.998295	0.978193		0.959098	0.999469	0.930305	0.973072	0.0130067		7.16667	0.9796	1.01478	0.930309	0.986454	0.964268	0.975082	0.0138697		7.16667	0.993094	0.989143	0.995039	0.98699	1.03032		0.998917	0.00797759		7.16667	0.991575	1.00338	0.988188	1.00368	0.997317	0.970509	0.992441	0.00506465
7.2	0.957583	0.965864	0.885075	0.986503	0.950726	0.967187		0.952156	0.0142885		7.2		1.00119	0.979819	0.962274	0.965894		0.934266	0.968689	0.0109867		7.2	0.98242	1.01975	0.945368	0.993618	0.96528	0.981288	0.0126085		7.2	0.994529	0.996633	0.999682	0.987411	1.01944		0.99954	0.00537033		7.2	0.993873	1.00852	0.989469	1.00089	0.996789	0.970723	0.993377	0.00524763
7.23333	0.953241	0.969095	0.874002	0.983743	0.953588	0.943963		0.946272	0.0155513		7.23333		0.999947	0.979734	0.960366	0.964746	1.00124	0.924903	0.971823	0.0116931		7.23333	0.9853	1.00916	0.939948	0.977246	0.962575	0.974846	0.011535		7.23333	0.982656	0.989624	1.01043	0.974151	1.01173		0.993719	0.0075029		7.23333	0.988248	1.00761	0.987566	0.995618	1.00752	0.974942	0.993585	0.00518799
7.26667	0.944784	0.975434	0.886694	0.989194	0.943938	0.957946		0.949665	0.0145111		7.26667		0.995041	0.971395	0.96389	0.950475	1.00553	0.920975	0.967883	0.0124983		7.26667	0.979086	1.01865	0.950975	0.984141	0.955593	0.977689	0.0120896		7.26667	0.989678	0.983789	1.00172	0.983403	1.0036		0.992437	0.00432856		7.26667	0.995786	1.0022	0.995816	0.998369	1.01127	0.978165	0.996936	0.00443594
7.3	0.959986	0.981664	0.888572	0.98819	0.933954	0.963829		0.952699	0.014988		7.3		0.990174	0.980968	0.967943	0.958182	1.00144	0.923744	0.970408	0.0112517		7.3	0.980537	1.01402	0.964754	0.981424	0.964092	0.980966	0.00905734		7.3	0.987162	0.99237	1.02039	0.971716	1.00561		0.99545	0.00826642		7.3	0.99485	1.00418	0.993195	0.99736	1.01165	0.982066	0.997218	0.00411598
7.33333	0.960911	0.973298	0.892777	0.990692	0.937656	0.945357		0.950115	0.0138636		7.33333		0.985223	0.987174	0.975516	0.95784	0.990835	0.92372	0.970051	0.0104577		7.33333	0.976623	1.00755	0.963947	0.980294	0.958555	0.977394	0.00852735		7.33333	0.99112	0.988596	1.01937	0.972949	0.988241		0.992055	0.00754489		7.33333	0.997075	1.00356	0.997084	1.01216	1.01047	0.972678	0.998837	0.00584664
7.36667	0.943846	0.9796	0.901153	0.99421	0.941034	0.952854		0.952116	0.013312		7.36667	0.952594	0.962805	0.991295	0.957699	0.952728	1.00716	0.91502	0.962757	0.0112273		7.36667	0.975436	1.01405	0.941606	0.992286	0.962613	0.977199	0.0123865		7.36667	0.987093	0.985976	1.02104	0.979824	1.00385		0.995558	0.0075142		7.36667	0.988099	1.00226	0.994994	1.01433	1.01642	0.979016	0.999188	0.00600894
7.4	0.943664	0.975332	0.884368	0.997739	0.92901	0.949333		0.946574	0.0159572		7.4	0.943154	0.970098	0.993651	0.958514	0.962999	1.00709	0.928703	0.966316	0.01029		7.4	0.972859	1.0182	0.964757	0.983573	0.962994	0.980476	0.0101078		7.4	0.979361	0.988179	1.00585	0.974388	1.00746		0.991047	0.00674829		7.4	0.986154	0.997238	0.9811		1.01494	0.979578	0.991802	0.00656004
7.43333		0.974961	0.903881	0.992625	0.926418	0.885524		0.936682	0.0204857		7.43333	0.932918	0.976625	0.994243	0.962249	0.958593		0.916612	0.956873	0.0115662		7.43333	0.967791	1.01059	0.947285	0.986995	0.952237	0.972979	0.0116795		7.43333	0.984565	0.985879	1.02141	0.968613	1.01055		0.994204	0.00955143		7.43333	0.9824	0.998878	0.984248	1.01141	1.01061	0.977626	0.994196	0.00605649
7.46667		0.971675	0.891408	0.995842	0.91915	0.922781		0.940171	0.0189919		7.46667	0.915223	0.981182		0.97127	0.952227	0.990054	0.922502	0.95541	0.0126807		7.46667	0.974066	1.01617	0.952333	0.983035	0.964132	0.977946	0.0108364		7.46667	0.980186	0.990962	1.00278	0.97451	1.00813		0.991312	0.00640466		7.46667	0.965631	0.990781	0.99635	1.01138	1.02126	0.989409	0.995803	0.00789035
7.5		0.972531	0.881869	0.997436	0.926044	0.950186		0.945613	0.0198461		7.5	0.925309	0.983542	0.998548	0.955562	0.950294	0.993522	0.920424	0.961029	0.0119922		7.5	0.978544	1.01447	0.964411	0.986383	0.974862	0.983733	0.00845738		7.5	0.968801	0.987024	1.01781	0.974291	1.0064		0.990865	0.00933675		7.5	0.968909	0.990397	0.986381	1.01147	1.00866	0.988842	0.992443	0.00641051
7.53333		0.977972	0.899231	1.00216	0.919929	0.959476		0.951755	0.0187879		7.53333	0.900076	0.975355	0.998543	0.949812	0.959143	0.993925	0.924969	0.957403	0.0135818		7.53333	0.961984	1.00491	0.962896	0.987642	0.980886	0.979664	0.00805093		7.53333	0.959528	0.987134	1.00315	0.974107	1.01283	0.983758	0.98675	0.00787151		7.53333	0.984636	0.985764	0.970919	1.00908	0.996266	0.981498	0.988027	0.00536365
7.56667		0.975255	0.900798	0.997872	0.926962	0.940123		0.948202	0.0172664		7.56667	0.95145	0.961868	0.996129	0.951395	0.953652	0.994686	0.919894	0.961296	0.0101137		7.56667	0.98194	1.0224	0.964054	0.982012	0.986226	0.987326	0.0095653		7.56667	0.978949	0.992525	1.00567	0.967568	1.01646	1.0023	0.993912	0.00738647		7.56667	0.970528	0.993415	0.986931	1.01261	1.01047	0.970719	0.990779	0.00752443
7.6		0.98254	0.888499	0.999308	0.917542	0.94997		0.947572	0.0203674		7.6	0.937625	0.975045	0.995813	0.931614	0.952128	0.911038	0.923541	0.946686	0.0113001		7.6	0.979997	1.01576	0.965401	0.986418	0.993828	0.988281	0.0083117		7.6	0.974056	0.995389	1.00593	0.977631	1.00293	0.997257	0.992198	0.00541847		7.6	0.981879	0.992367	0.98483	1.00538	1.0069	0.991036	0.993732	0.00423463
7.63333		0.979501	0.896239	0.993676	0.916993	0.947434		0.946769	0.0183194		7.63333	0.914842	0.962529	1.00196	0.92699	0.959733	0.986483	0.927461	0.954286	0.012371		7.63333	0.974287	1.01584	0.965896	0.976154	0.989163	0.984268	0.00872875		7.63333	0.964188	0.990527	1.01625	0.970347	1.01386	0.988998	0.990695	0.00877358		7.63333	0.983563	0.986577	0.985887	0.998842	1.00446	0.982007	0.990223	0.00374638
7.66667		0.980662	0.897624	0.979633	0.909369	0.961095		0.945677	0.0176664		7.66667	0.94363	0.958639	0.996125	0.939737	0.952885	0.990135	0.925304	0.958065	0.00990649		7.66667	0.981173	1.01393	0.952432	0.985265	0.992636	0.985087	0.00992639		7.66667	0.960979	0.990475	0.999651	0.966897	1.00377	0.987248	0.984837	0.00708657		7.66667	0.988149	0.986801	0.977784	1.00088	1.01076	0.987909	0.992049	0.00480164
7.7		0.979034	0.877602	0.994141	0.92259	0.968267		0.948327	0.0213351		7.7	0.926496	0.96286	0.995199	0.932422	0.954664	0.988399	0.929876	0.955702	0.0106272		7.7	0.980719	0.97221	0.95363	0.977184	0.992157	0.97518	0.00630932		7.7	0.968133	0.993615	0.997575	0.961591	1.01576	1.00927	0.99099	0.00891537		7.7	0.985975	0.988471	0.963908	1.00814	1.00992	0.977887	0.989049	0.00722573
7.73333		0.982256	0.906493	0.995114	0.922523	0.977743		0.956826	0.0176923		7.73333	0.944811	0.960063	0.995606	0.934369	0.94967	0.994375	0.928028	0.958132	0.0102836		7.73333	0.991894	1.0142	0.955777	0.997977	0.998847	0.991739	0.00971409		7.73333	0.960751	0.994884	1.00796	0.966356	1.00598	1.01146	0.991233	0.00907017		7.73333	0.967987	0.992034	0.971615	1.00514	1.01321	0.97055	0.986756	0.00797891
7.76667		0.984041	0.918368	0.982918	0.922666	0.967649		0.955128	0.0144397		7.76667	0.93238	0.980902	0.992987	0.92256	0.956069	0.987777	0.923439	0.956588	0.0116821		7.76667	0.970316	1.01372	0.952484	0.994516	0.986132	0.983434	0.0104338		7.76667	0.968214	0.994314	1.01692	0.965275	0.995461	0.975098	0.98588	0.00812258		7.76667	0.971873	0.992213	0.967602	1.00857	1.01136	0.978659	0.988379	0.00763567
7.8		0.982426	0.92512	0.98523	0.920159	0.968017		0.95619	0.0140269		7.8	0.929299	0.961441	0.985215	0.940023	0.948655	0.993847	0.919675	0.954022	0.0104993		7.8	0.975875	1.01374	0.944976	0.996674	0.989324	0.984117	0.0115371		7.8	0.985555	0.989196	0.996561	0.95425	0.988906	0.999904	0.985729	0.00666173		7.8	0.97409	0.989131	0.973369	0.999772	1.0099	0.979542	0.987634	0.00604894
7.83333		0.982235	0.919338	0.988828	0.932642	0.957123		0.956033	0.013522		7.83333	0.936817	0.983108	0.985709	0.951742	0.953988	0.989316	0.928776	0.961351	0.00933287		7.83333	0.977906	1.01644	0.943934	1.00334	0.991985	0.98672	0.0124407		7.83333	0.988221	0.999007	0.996367	0.955767	0.980655	1.00306	0.987179	0.00708712		7.83333	0.980923	0.987325	0.963842	0.990653	1.0061	0.982715	0.98526	0.0056322
7.86667		0.979364	0.92796	0.988667	0.916215	0.960604		0.954562	0.0141296		7.86667	0.915776	0.984447	0.978967	0.951202	0.951614	0.988249	0.920071	0.955761	0.0112625		7.86667	0.978736	1.01648	0.94884	1.00543	0.993236	0.988543	0.011747		7.86667	0.996433	1.00219	1.01225	0.96044	0.988326	1.01	0.99494	0.00777846		7.86667	0.990659	0.988647	0.971885	0.993568	1.00194	0.990984	0.989614	0.0040242
7.9		0.981023	0.929088	0.984289	0.936289	0.956447		0.957427	0.0112455		7.9	0.920791	0.993708	0.98868	0.963987	0.956076	0.992338	0.920812	0.962342	0.0120222		7.9	0.972912	1.01156	0.969997	0.998074	0.992305	0.988969	0.00781678		7.9	0.985462	0.992202	0.997083	0.955344	1.00206	1.00629	0.989741	0.00749926		7.9	0.981566	0.989889	0.958704	0.995924	1.00253	0.990651	0.986543	0.00624861
7.93333		0.97359	0.931287	0.984968	0.929996	0.959095		0.955787	0.0110563		7.93333	0.917326	0.950836	0.981847	0.973862	0.966052	0.98298	0.910623	0.954789	0.0113255		7.93333	0.977207	1.01308	0.957839	0.998145	0.99191	0.987637	0.00941492		7.93333	0.993716	0.991167	0.996659	0.953419	1.00173	1.00682	0.990586	0.00778112		7.93333	0.97735	0.993545	0.960408	0.984176	1.00238	0.983464	0.983553	0.00585579
7.96667		0.977247	0.934674	0.988831	0.928045	0.964496		0.958659	0.0118374		7.96667	0.932829	0.983919	0.9646	0.981995	0.957325	0.98199	0.91874	0.9602	0.00976899		7.96667	0.974811	1.00907	0.947481	1.01882	0.990949	0.988225	0.012684		7.96667	1.00225	1.00153	1.0009	0.954322	1.00888	1.00498	0.995477	0.00831777		7.96667	0.982057	0.990176	0.958885	0.985287	0.994606	0.977998	0.981502	0.00511669
8		0.991391	0.939256	0.978468	0.934505	0.962079		0.96114	0.0109649		8	0.926633	0.964354	0.978822	0.962594	0.954228	0.983605	0.928141	0.956911	0.00849654		8	0.978004	1.00612	0.958313	1.00999	0.999166	0.990318	0.00972337		8	1.00917	0.999417	0.995514	0.96208	0.99692	1.01539	0.996415	0.00755377		8	0.975153	0.994894	0.957788	0.98887	0.999632	0.982525	0.983144	0.00619097
8.03333		0.986477	0.937681	0.985481	0.938413	0.965903		0.962791	0.0107478		8.03333	0.913937	0.981784	0.983799	0.966531	0.960969	0.976754	0.92726	0.958719	0.0104054		8.03333	0.977796	1.00544	0.948269	1.01469	0.990866	0.987414	0.0116319		8.03333	1.00553	1.00007	0.994371	0.961694	1.00386	1.00015	0.994278	0.00670348		8.03333	0.977937	0.997161	0.960653	0.983011	0.98925	0.974059	0.980345	0.00517129
8.06667		0.984343	0.918741	0.979002	0.93695	0.96452		0.956711	0.0125571		8.06667	0.911876	0.964419	0.978723	0.95649	0.955892	0.984036	0.927752	0.95417	0.0098741		8.06667	0.990681	1.00275	0.975109	1.0045	0.99946	0.994501	0.0054006		8.06667		0.998844	1.00506	0.967265	1.00448	1.0094	0.997009	0.00762284		8.06667	0.979	0.989248	0.965226	0.987198	0.993979	0.979265	0.982319	0.00416455
8.1		0.983888	0.936783	0.992197	0.931935	0.9572		0.960401	0.0121265		8.1	0.922009	0.981755	0.973616	0.953731	0.952574	0.977603	0.918445	0.954247	0.00976071		8.1	0.982701	1.00127	0.96272	1.00697	1.00032	0.990796	0.00811122		8.1		1.00011	0.998313	0.965595	0.996417	1.00291	0.99267	0.0068528		8.1	0.982858	0.992933	0.964697	0.985127	0.993625	0.983915	0.983859	0.00427198
8.13333		0.975337	0.935201	0.992101	0.94429	0.963435		0.962073	0.0102903		8.13333	0.921207	0.993711	0.971226	0.955083	0.953147	0.974635	0.937143	0.958022	0.00919079		8.13333	0.98261	0.99603	0.961934	0.999768	0.99962	0.987992	0.00723363		8.13333		1.01107	0.995085	0.964821	1.00125	1.01006	0.996459	0.00843944		8.13333	0.986015	0.996511	0.967426	0.989125	1.00152	0.988658	0.988209	0.00477466
8.16667		0.982357	0.940771	0.990811	0.947521	0.935153		0.959322	0.0113791		8.16667	0.921786	0.987633	0.974715	0.953369	0.960313	0.98212	0.924902	0.957834	0.0099676		8.16667	0.976943	0.997449	0.974588	0.999583	0.999983	0.989709	0.00572093		8.16667		1.00633	1.00303	0.965583	0.997796	1.01359	0.997264	0.00832374		8.16667	0.983989	0.995839	0.95446	0.978554	0.989991	0.975601	0.979739	0.00588769
8.2		0.98537	0.93525	0.993223	0.942149	0.935484		0.958295	0.0127772		8.2	0.928856	0.966399	0.965378	0.948937	0.951333	0.976782	0.926275	0.951994	0.00725006		8.2	0.990318	0.992285	0.953346	0.990928	1.00195	0.985765	0.00837469		8.2		1.01367	0.997109	0.954887	0.992227	1.00961	0.9935	0.0104207		8.2	0.972667	0.995367	0.950417	0.986194	0.994751	0.986338	0.980956	0.00696583
8.23333		0.986369	0.948682	0.990458	0.929144	0.959495		0.96283	0.0115399		8.23333	0.926452	0.997346	0.952291	0.939458	0.957045	0.979682	0.927004	0.954183	0.0100588		8.23333	0.978864	0.986771	0.970076	0.982869	1.00372	0.98446	0.00555452		8.23333		1.01074	1.01353	0.970656	0.99495	1.00722	0.999419	0.00785954		8.23333	0.992716	0.998928	0.955692	0.999045	0.988349	0.995152	0.988314	0.0067284
8.26667		0.974568	0.936525	0.996027	0.936178	0.954154		0.95949	0.011536		8.26667	0.917193	0.9607	0.972153	0.9454	0.962481	0.981748	0.927387	0.952437	0.00891248		8.26667	0.983615	0.980502	0.97176		0.996744	0.983156	0.00517812		8.26667		1.00493	1.00956	0.959675	0.99047	1.01086	0.9951	0.0095672		8.26667	0.98937	0.999594	0.951283	0.998271	0.996535	0.996861	0.988652	0.00761296
8.3		0.985709	0.940412	1.01113	0.929963	0.948944		0.963232	0.0152174		8.3	0.919354	0.984797	0.964583	0.941898	0.944973	0.975294	0.922402	0.950472	0.00957861		8.3	0.981126	0.97655	0.974479	0.977501	1.00022	0.981975	0.00468615		8.3		1.0209	1.00917	0.96608	1.00484	0.999945	1.00019	0.00920587		8.3	0.97946	1.00284	0.95598	0.999041	0.982328	0.996328	0.985997	0.00711315
8.33333		0.986532	0.934538	1.00232	0.941367	0.96675		0.966301	0.0129174		8.33333	0.920178	0.990343	0.961064	0.935629	0.94769	0.971578	0.916708	0.949027	0.0102569		8.33333	0.981495	0.983916	0.972246	0.981299	1.00064	0.98392	0.00463		8.33333		1.01134	0.994175	0.962429	1.00055	1.00723	0.995145	0.00868565		8.33333	0.985178	0.992366	0.964207	0.999525	1.00124	0.997997	0.990086	0.00570135
8.36667		0.988177	0.933832	1.00157	0.930599	0.943303		0.959496	0.0147456		8.36667	0.928265	0.989131	0.959715	0.943167	0.953634	0.975129	0.922254	0.953042	0.00912155		8.36667	0.978796	0.980769	0.984968	0.968885	1.00508	0.983699	0.00596128		8.36667		1.01228	1.00419	0.957358	1.00624	0.996527	0.995317	0.0098182		8.36667	0.991598	0.994665	0.968618	1.00003	1.00324	0.998269	0.992737	0.00510176
8.4		0.984471	0.949708	1.00702	0.934211	0.950652		0.965211	0.0132888		8.4	0.928408	0.980862	0.972003	0.951834	0.945841	0.979831	0.918867	0.953949	0.00935213		8.4	0.979343	0.97798	0.971837	1.00148	1.00662	0.987453	0.00694122		8.4		1.01962	1.00023	0.956776	1.00166	0.997302	0.995118	0.0103541		8.4	0.994738	1.00107	0.957551	0.981743	1.00381	1.00617	0.990848	0.00755903
8.43333		0.979676	0.95983	1.00141	0.935857	0.952423		0.965838	0.0113389		8.43333	0.936437	1.00194	0.961063	0.939763	0.953935	0.98551	0.918493	0.956734	0.0109765		8.43333	0.97151	0.980827	0.972721	1.00221	1.00455	0.986364	0.00713891		8.43333		1.01104	0.998809	0.965954	1.00966	0.991851	0.995462	0.0081827		8.43333	0.967907	0.987523	0.95399	1.00014	1.00708	1.00047	0.986186	0.00857894
8.46667		0.977292	0.93776	1.01005	0.92971	0.961216		0.963206	0.0144329		8.46667	0.932939	0.953819	0.914843	0.950958	0.943505	0.906322	0.923961	0.932336	0.00687696		8.46667	0.969265	0.984707	0.980849	0.996608	1.00484	0.987255	0.00619702		8.46667		1.01246	1.00988	0.969458	1.00898	0.995003	0.999156	0.0080242		8.46667	0.995812	0.986919	0.949856	1.00882	1.00901	0.992137	0.990425	0.00889496
8.5		0.983897	0.934349	1.00655	0.928245	0.971131		0.964834	0.0148512		8.5	0.936598	0.998565	0.973186	0.956154	0.961278	0.97952	0.929844	0.962164	0.00910636		8.5	0.969181	0.986135	0.985255	0.994683	1.00156	0.987363	0.00543902		8.5	1.00062	1.01502	0.998364	0.977836	1.00517	0.984582	0.996933	0.00556178		8.5	1.00175	0.989337	0.959535	1.00351	1.01765	0.985342	0.992854	0.00813708
8.53333		0.987921	0.933901	0.996678	0.935653	0.97022		0.964874	0.0130085		8.53333	0.933964	0.978863	0.969258	0.957186	0.948275	0.972157	0.921183	0.954412	0.00801891		8.53333	0.972702	0.980649	0.993153	0.993726	1.00069	0.988183	0.00504084		8.53333	1.01109	1.0119	1.00408	0.975382	1.00979	0.991117	1.00056	0.00594515		8.53333	0.983159	0.989167	0.959757	1.00705	1.0172	0.992792	0.991521	0.00813776
8.56667		0.988339	0.933225	1.00855	0.939285	0.971137		0.968107	0.0143203		8.56667	0.932584	0.98208	0.960468	0.957831	0.951154	0.994454	0.926573	0.957878	0.00925208		8.56667	0.963572	0.974676	0.994148	1.0092	0.996774	0.987673	0.00817848		8.56667	1.01085	1.01179	1.02285	0.973562	1.0068	0.998258	1.00402	0.00690503		8.56667	0.993612	0.982318	0.96739	1.00164	1.02827	0.997832	0.995178	0.00833436
8.6		0.987983	0.947395	0.997495	0.940109	0.962735		0.967143	0.011171		8.6	0.941243	0.978426	0.959256	0.95662	0.965259	0.972237	0.932872	0.957988	0.00614957		8.6	0.959743	0.985044	0.987583	0.998889	1.00085	0.986421	0.0073436		8.6	1.00501	1.01316	0.991207	0.990072	1.00553	1.00429	1.00154	0.00369163		8.6	0.994409	1.00217	0.976833	0.999545	1.00768	0.992372	0.995502	0.00435391
8.63333		0.987352	0.934863	1.00407	0.920661	0.942506		0.957891	0.0160528		8.63333	0.961971	0.986178	0.907781	0.955069	0.952232		0.928329	0.948593	0.0111401		8.63333	0.973663	0.981402	0.995628	0.999239	1.00663	0.991312	0.00602364		8.63333	0.996883	1.00948	0.991928	0.98412	1.00516	1.00472	0.998715	0.00389825		8.63333	0.998093	0.991325	0.968884	1.00149	1.01611	1.00118	0.996181	0.00638462
8.66667		0.980312	0.941543	0.989181	0.936609	0.963588		0.962247	0.0103429		8.66667	0.953952	0.964041	0.951984	0.952331	0.945298	0.971316	0.919682	0.951229	0.00618612		8.66667	0.96826	0.99703	0.99039	0.99856	1.00173	0.991194	0.0060247		8.66667	0.990683	1.01259	1.00359	1.00093	1.0095	1.00939	1.00445	0.00325973		8.66667	0.991402	0.988141	0.973469	1.00245	1.01891	1.00975	0.997352	0.00667077
8.7		0.990544	0.939836	0.991575	0.936399	0.946506		0.960972	0.0123912		8.7	0.955193	0.981701		0.957579	0.961488	0.969705	0.925271	0.958489	0.0077216		8.7	0.967063	0.998774	0.986885	1.00285	0.997989	0.990712	0.00647727		8.7	0.990473	1.01763	0.985314	0.981185	1.01632	1.00711	0.999673	0.00655116		8.7	0.978466	0.995097	0.96525	1.0031	1.01883	1.00519	0.994323	0.00794422
8.73333		0.977651	0.928575	0.986778	0.941147	0.950305		0.956891	0.0109938		8.73333	0.962421	0.987611	0.963399	0.95908	0.958674	0.973525	0.939291	0.963429	0.00558886		8.73333	0.966117	1.00502	0.992399	0.99638	1.00176	0.992335	0.00690464		8.73333	0.996047	0.998785	1.01029	0.985744	1.01012	1.00348	1.00074	0.00381886		8.73333	0.994873	0.987652	0.956514	1.00104	1.00991	1.0052	0.992532	0.00787726
8.76667		0.978585	0.932497	0.979712	0.937308	0.958461		0.957312	0.00992877		8.76667	0.970303	0.981353	0.970007	0.956724	0.957682	0.978375	0.924554	0.962714	0.00727165		8.76667	0.955812	1.00477	0.969967	0.988779	0.997318	0.983328	0.00900172		8.76667	0.992957	1.01244	0.986737	0.98631	1.01519	1.00256	0.999365	0.00517165		8.76667	0.996201	0.996926	0.969582	1.00383	1.01244	1.01201	0.998498	0.00645279
8.8		0.973843	0.928115	0.982585	0.938891	0.955067		0.9557	0.0102368		8.8	0.968309	0.961536	0.969704	0.951438	0.964616	0.980398	0.934296	0.961471	0.00560989		8.8	0.969382	1.0005	0.993603	0.993177		0.989166	0.00680492		8.8	0.985586	1.0171	1.00626	0.986852	1.00974	0.974256	0.996633	0.00683618		8.8	0.998373	0.993366	0.953466	1.00216	1.0186	1.0037	0.994944	0.00898689
8.83333		0.975899	0.928049	0.980449	0.926226	0.950114		0.952147	0.0114497		8.83333	0.967023	0.959881	0.9757	0.940867	0.956601	0.971531	0.938018	0.958517	0.00550812		8.83333	0.972772	1.00641	0.991752	0.994156	1.00069	0.993158	0.00570557		8.83333	0.998074	1.01681	0.999818	0.992117	1.00573	0.98714	0.999949	0.00426913		8.83333	0.988979	0.993537	0.957238	0.994411	1.02047	1.0064	0.993506	0.00862165
8.86667		0.97556	0.930744	0.996669	0.940358	0.950163		0.958699	0.0120763		8.86667	0.967385	0.981248	0.965605	0.954472	0.951879	0.96981	0.937745	0.961164	0.00538072		8.86667	0.975196	1.00277	0.979023	0.998668	1.00232	0.991596	0.00598749		8.86667	0.998679	1.01061	0.999452	0.990558	1.01479	0.974791	0.998148	0.00588123		8.86667	0.997707	0.988052	0.965553	0.999159	1.02481	0.971394	0.991113	0.00874742
8.9		0.949108	0.935305	0.965436	0.934834	0.954539		0.947845	0.00584118		8.9	0.963771	0.986261	0.968514	0.956234	0.950332	0.991413	0.933407	0.964276	0.00763754		8.9	0.971054	1.00654	0.983491	0.994499	0.990976	0.989312	0.00588932		8.9	1.01654	1.01192	1.01418	0.982318	1.01065	0.992443	1.00468	0.00568266		8.9	1.00187	0.990691	0.964403	0.999258	1.00888	0.997902	0.993833	0.00635834
8.93333		0.9658	0.924317	0.982747	0.929728	0.950791		0.950676	0.0109337		8.93333	0.952117	0.964681	0.95582	0.955005	0.957371	0.979699	0.933198	0.956842	0.00527782		8.93333	0.973007	1.01349	0.986612	0.997094	0.993277	0.992695	0.00662039		8.93333	1.00837	1.01275	0.992131	0.988609	1.00548	0.979814	0.997859	0.00527359		8.93333	1.01679	0.9868	0.976033	0.998525	1.00933	0.995482	0.99716	0.00603284
8.96667		0.962214	0.938501	0.983975	0.931778	0.962274		0.955749	0.0093626		8.96667	0.949788	0.971235	0.96287	0.948578	0.962755	0.990518	0.938397	0.960592	0.00649617		8.96667	0.967647	1.00812	0.994003	0.995926	0.983549	0.989849	0.00678492		8.96667	1.01096	1.01188	1.00644	0.988937	1.01428	0.980959	1.00224	0.00566059		8.96667	1.01054	0.984829	0.957938	0.988741	1.00747	0.989793	0.989886	0.00771016
9		0.963724	0.934413	0.98717	0.928609	0.958447		0.954472	0.0105873		9	0.966156	0.963519	0.961251	0.954606	0.960269	0.988921	0.935438	0.961451	0.00598798		9	0.961624	1.00872	0.987096	1.00507	0.985568	0.989616	0.00839694		9	1.00837	1.00723	0.991063		1.0123	0.988203	1.00143	0.00491175		9	1.00744	0.984339	0.965364	1.0057	1.00273	0.981799	0.991228	0.00685499
9.03333		0.966112	0.932015	0.988952	0.936759	0.971686		0.959105	0.0107968		9.03333	0.965795	0.977792	0.958461	0.94381	0.964694	0.98514	0.92848	0.960596	0.00733501		9.03333	0.969231	1.02733	0.98516	0.996685	0.984197	0.99252	0.00973336		9.03333	1.01705	1.00767	0.999724		1.01437	0.981307	1.00403	0.00642123		9.03333	1.00787	0.986847	0.961993	1.00235	1.00226	0.980014	0.990222	0.00710847
9.06667		0.944685	0.934836	0.989664	0.936519	0.980391		0.957219	0.0115676		9.06667	0.959845	0.975611	0.956399	0.951299	0.959014	0.978549	0.927488	0.958315	0.00638936		9.06667	0.981672	1.00027	0.97258	1.00064	0.99105	0.989241	0.00542975		9.06667	1.01358	1.01842	1.00115		1.00481	0.979791	1.00355	0.00668408		9.06667	0.999438	0.978524	0.964659	0.987393	1.00377	0.961177	0.982493	0.00719264
9.1		0.950956	0.929907	0.98014	0.943095	0.960994		0.953018	0.0084736		9.1	0.954336	0.9865	0.952787	0.952363	0.954973	0.980043	0.928029	0.958433	0.00736241		9.1	0.964038	1.00909	0.984908	1.00996	0.994656	0.992531	0.0085222		9.1	1.01552	1.01737	1.00263		1.01156	0.991254	1.00767	0.00482538		9.1	1.00417	0.978193	0.965036	0.996105	0.992368	0.9684	0.984046	0.00648135
9.13333		0.947262	0.941152	0.99494	0.92859	0.957872		0.953963	0.0112855		9.13333	0.960179	0.982165	0.963804	0.952773	0.974274	0.973783	0.935386	0.963195	0.0059484		9.13333	0.978083	1.0156	0.995529	1.01025	0.995282	0.998949	0.00657861		9.13333	1.01782	1.02413	1.00867		1.00912	0.9943	1.01081	0.00503227		9.13333	0.996095	0.976941	0.96891	0.987645	0.995952	0.951792	0.979556	0.00706826
9.16667		0.941736	0.939112	0.997621	0.930967	0.96704		0.955295	0.0121799		9.16667	0.964404	0.973605	0.948396	0.943361	0.966877	0.975758	0.931977	0.957768	0.00629068		9.16667	0.971998	1.0066	0.973744	0.997687	0.991879	0.988381	0.00675795		9.16667	1.01593	1.0271	0.981978		1.00619	0.992961	1.00483	0.00801218		9.16667	0.992521	0.981926	0.974134	0.989294	0.988862	0.971194	0.982989	0.00357657
9.2		0.93975	0.941585	0.97495	0.929338	0.963156		0.949756	0.00836092		9.2	0.960807	0.970029	0.962345	0.939278	0.957392	0.975647	0.928446	0.956278	0.00633658		9.2	0.978689	1.00757	0.97865	1.00337	0.997451	0.993145	0.00612414		9.2	1.01373	1.01745	0.999791		1.00799	0.992354	1.00626	0.00457813		9.2	0.995528	0.97583	0.970336	0.983617	0.988421	0.974247	0.98133	0.00390884
9.23333		0.941819	0.941716	0.997803	0.944745	0.946472		0.954511	0.0108604		9.23333	0.974087	0.979457	0.957042	0.950564	0.949829	0.985632	0.932297	0.961273	0.00722333		9.23333	0.979073	1.01784	0.982346	1.00754	0.990796	0.99552	0.00744725		9.23333	1.02954	1.02554	1.00465		1.00654	1.00211	1.01368	0.00573777		9.23333	0.986527	0.980603	0.979215	0.981303	1.0079	0.967774	0.983887	0.00542327
9.26667		0.926043	0.936481	0.995989	0.940257	0.975739		0.954902	0.0132458		9.26667	0.956362	0.965233	0.954536	0.944694	0.966934	0.976266	0.928632	0.956094	0.00596523		9.26667	0.981583	1.01883	0.983478	1.00848	0.988118	0.996098	0.00742883		9.26667	1.01965	1.02664	1.0089		1.00226	1.00233	1.01196	0.00485185		9.26667	0.98521	0.983594	0.970224	0.968222	1.01039	0.964477	0.980354	0.00692431
9.3		0.922699	0.947227	0.98082	0.939432	0.870322		0.9321	0.0181124		9.3	0.958952	0.969674	0.960092	0.932571	0.964869	0.972687	0.919388	0.954033	0.00760926		9.3	0.980743	1.01395	0.992479	1.00046	0.983713	0.994269	0.00601381		9.3	1.01823	1.03222	1.00928		0.996033	1.00429	1.01201	0.00620221		9.3	0.986907	0.985554	0.979779	0.970174	1.01059	0.953022	0.981005	0.00781643
9.33333		0.918038	0.945527	1.00374		0.975938		0.96081	0.018562		9.33333	0.956098	0.97091	0.954954	0.942181	0.970481	0.979512	0.92139	0.956504	0.00751662		9.33333	0.982655	1.00755	0.977755	0.998365	0.993824	0.99203	0.00536634		9.33333	1.02691	1.03546	1.0072		1.01169	0.993454	1.01494	0.00740366		9.33333	0.996492	0.996851	0.975223	0.963984	1.015	0.944001	0.981925	0.0105421
9.36667		0.92118	0.933598	0.96647		0.849038		0.917571	0.0247619		9.36667	0.917505	0.962206	0.959887	0.935359	0.9619	0.96832	0.923032	0.946887	0.00794877		9.36667	0.982127	1.01707	0.969813	0.999202	0.995616	0.992766	0.00800143		9.36667	1.02396	1.02825	0.989346		0.996497	0.997525	1.00712	0.0079082		9.36667	0.988302	0.99142	0.973562	0.976451	1.02128	0.976288	0.987884	0.0072993
9.4		0.920018	0.934242	0.985785	0.943225	0.824762		0.921606	0.0265776		9.4	0.95842	0.971177	0.949558	0.944862	0.957796	0.979053	0.91863	0.954214	0.00741723		9.4	0.988313	1.01037	0.979974	0.998504		0.99429	0.00656375		9.4	1.00574	1.02558	1.03024		1.007	1.00074	1.01386	0.00587741		9.4	0.976393	0.993499	0.981121	0.977618	1.01624	0.988637	0.988918	0.00609124
9.43333		0.933265	0.946148	0.994341	0.94938	0.873489		0.939325	0.0194236		9.43333	0.954687	0.956907	0.954235	0.943101	0.962011	0.980164	0.912963	0.95201	0.00776561		9.43333	0.994024	1.01806	0.976418	0.993275	0.994427	0.99524	0.00663647		9.43333	1.00269	1.02688	1.0074		0.999835	1.00162	1.00768	0.00496011		9.43333	0.982305	0.987452	0.977236	0.979788	1.01691	0.982713	0.987735	0.00599897
9.46667		0.928128	0.934986	0.99324	0.94072	0.975968		0.954608	0.0127039		9.46667	0.941188	0.966443	0.947437	0.94278	0.98219	0.983241	0.911417	0.953528	0.00969705		9.46667	0.98382	1.00842	0.973963	0.985315	0.990717	0.988448	0.00567964		9.46667	1.00756	1.03051	1.02233		1.00656	0.996557	1.0127	0.00606109		9.46667	0.977903	0.987507	0.979464	0.979978	1.01077	0.990221	0.98764	0.00503975
9.5		0.928907	0.933222	1.0021	0.937818	0.978561		0.956121	0.0145215		9.5	0.954964	0.970637	0.95249	0.946523	0.964662	0.978936	0.909345	0.953937	0.00854312		9.5	0.974614	1.01432	0.969297	0.984931	0.998726	0.988378	0.00820257		9.5	1.00488	1.03542	0.991832		1.00999	1.00025	1.00847	0.00736795		9.5	0.981122	0.987444	0.977918	0.968965	0.976269	0.988673	0.980065	0.00301046
9.53333		0.93174	0.935764	0.988693	0.940657	0.967572		0.952885	0.0109263		9.53333	0.950076	0.976658	0.956202	0.943535	0.954772	0.972745	0.907298	0.951612	0.0086414		9.53333	0.981676	1.02002	0.971741	0.995442	0.999061	0.993589	0.0082201		9.53333	1.00859	1.02784	1.01321		1.00831	1.0017	1.01193	0.00437918		9.53333	0.966639	0.990047	0.98429	0.968855	1.01289	0.986859	0.984929	0.006843
9.56667		0.924345	0.934606	0.995073	0.943216	0.970305		0.953509	0.0128909		9.56667	0.944111	0.974863	0.949308	0.946022	0.963213	0.975139	0.901651	0.950615	0.00952521		9.56667	0.978262	1.01459	0.9848	0.981625	0.994694	0.990795	0.00655199		9.56667	1.00363	1.02598	1.00274		1.01026	1.01053	1.01063	0.00416432		9.56667	0.975357	0.985247	0.974248		1.00698	0.983443	0.985054	0.00589084
9.6		0.927829	0.933186	0.993738	0.945223	0.963214		0.952638	0.0119371		9.6	0.952562	0.97578	0.951967	0.941482	0.951674	0.976135	0.89725	0.94955	0.0100173		9.6	0.985261	1.02159	0.969682	0.985063	0.999997	0.992318	0.00874772		9.6	1.00236	1.03159	1.01536		1.00663	1.01	1.01319	0.00506909		9.6	0.974329	0.988238	0.981666		0.994966	0.987823	0.985404	0.0034781
9.63333	0.928854	0.933798	0.937994	0.992391	0.935196	0.955527		0.947293	0.00975805		9.63333	0.946674	0.972986	0.957141	0.932819	0.90023	0.982901	0.899796	0.941792	0.0124346		9.63333	0.981183	1.0131	0.972891	0.987963	0.997777	0.990582	0.00695281		9.63333	1.01191	1.03761	0.988638		1.00274	1.00734	1.00965	0.00800437		9.63333	0.976489	0.986395	0.989194		1.00395	0.973483	0.985903	0.00538411
9.66667	0.93299	0.930048	0.936857	0.984063	0.945623	0.938192	1.00338	0.953022	0.0108723		9.66667	0.936904	0.965475	0.962185	0.93676	0.92301	0.982101	0.891974	0.94263	0.0114231		9.66667	0.976752	1.0178	0.968098	0.981613	0.988544	0.986561	0.00848866		9.66667	1.01121	1.03103	0.987067		0.995717	1.00886	1.00677	0.00749251		9.66667	0.994461	0.985608	0.994767		1.0018	0.977583	0.990843	0.0041935
9.7	0.942415	0.931171	0.941515	0.977791	0.933844	0.934596	1.017	0.954048	0.0120806		9.7	0.94233	0.97285	0.962931	0.9321	0.93595	0.985414	0.892254	0.946261	0.0117076		9.7	0.978841	1.01896	0.963819	0.989022	0.99259	0.988646	0.00907457		9.7	1.01421	1.02489	0.992087		1.00199	0.991756	1.00499	0.00644901		9.7	0.999665	0.993541	0.985223		1.01439	0.957401	0.990044	0.00945074
9.73333	0.941042	0.947957	0.932428	0.98442	0.926456	0.966227	1.0099	0.958347	0.0114387		9.73333	0.944494	0.959844	0.960832	0.934681	0.953191	0.985841	0.896161	0.947863	0.0105115		9.73333	0.974549	1.01858	0.971316	0.984623	0.981815	0.986177	0.00844884		9.73333	0.990422	1.03259			0.999939	1.00193	1.00622	0.00914224		9.73333	1.00006	0.981225	0.993305		1.00702	0.981592	0.992639	0.00507208
9.76667	0.941781	0.936226	0.923743	0.978489	0.938316	0.953936	1.01595	0.955492	0.0120012		9.76667	0.936958	0.97102	0.962322	0.935863	0.963883	0.995227	0.898616	0.951984	0.0117662		9.76667	0.979292	1.01544	0.969081	0.986268	0.985379	0.987091	0.00772121		9.76667	1.0109	1.0314	0.981262		1.00123	1.00492	1.00594	0.00807842		9.76667	0.994686	0.986328	0.982487		1.00822	0.967467	0.987837	0.00673838
9.8	0.948535	0.929105	0.934148	0.989185	0.938696	0.944066	1.00999	0.956246	0.0116636		9.8	0.932154	0.973768	0.95312	0.92939	0.957367	0.985457	0.906533	0.948255	0.010348		9.8	0.970273	1.01121	0.970416	0.985649	0.976687	0.982847	0.0076249		9.8	1.00324	1.03334	0.980982		1.00286	1.00345	1.00477	0.00833668		9.8	0.9929	0.985045	0.980203		1.00577	0.971935	0.987171	0.00576168
9.83333	0.949855	0.947714	0.91995	0.985647	0.934499	0.962631	1.01662	0.959559	0.0123225		9.83333	0.929	0.984482	0.951107	0.860912	0.963667	1.00295	0.905124	0.942463	0.0183709		9.83333	0.981076	1.02054	0.962634	0.980571	0.97265	0.983494	0.00984784		9.83333	1.01241	1.03478			0.99616	1.00728	1.01266	0.00811626		9.83333	1.00003	0.983835	0.986385		1.00483	0.988247	0.992665	0.00411747
9.86667	0.943509	0.942506	0.933855	0.975168	0.92261	0.94145	1.01945	0.954078	0.012462		9.86667	0.919182	0.968596	0.956465	0.9421	0.96111	0.997276	0.90355	0.949754	0.0118677		9.86667	0.971423	1.00543	0.936636	0.979407	0.961646	0.970908	0.0112353		9.86667	1.00447	1.03913	0.987346		0.997797	0.996513	1.00505	0.00894576		9.86667	0.985627	0.989358	0.987298		1.00269	0.987191	0.990432	0.00312025
9.9	0.952014	0.93715	0.931202	0.993731	0.938974	0.94721	1.01554	0.959403	0.0121896		9.9	0.921936	0.983213	0.959268	0.94028	0.969519	0.985172	0.908796	0.952598	0.0112754		9.9	0.98027	0.997544	0.95859	0.967012	0.966458	0.973975	0.00684411		9.9	1.00653	1.03826	1.00277		0.995707	0.99701	1.00805	0.0078008		9.9	0.97241	0.98749	0.987567		0.995961	0.999649	0.988615	0.00469412
9.93333	0.956035	0.940927	0.934638	0.97236	0.933696	0.967315	1.0208	0.960825	0.0115604		9.93333	0.912142	0.986212	0.955494	0.942071	0.961926	0.988918	0.910351	0.951016	0.0120112		9.93333	0.979387	1.00382	0.960316	0.971619	0.965457	0.97612	0.00762136		9.93333	0.997764	1.03673	0.986061		1.00392	0.997483	1.00439	0.00858478		9.93333	0.977167	0.982961	0.985284		0.995652	0.997717	0.987756	0.00389096
9.96667	0.953759	0.941517	0.933076	0.991339	0.941767	0.95391	1.02036	0.962247	0.0120169		9.96667	0.91625	0.990295	0.950572	0.952278	0.950858	1.01201	0.912095	0.954908	0.0136996		9.96667	0.978461	1.00001	0.962511	0.976256	0.950115	0.97347	0.00837397		9.96667	0.997436	1.02998	0.994079		1.00031	1.00537	1.00544	0.00640925		9.96667	0.983305	0.989687	0.993477		1.00058	0.986156	0.990641	0.00301381
10	0.948975	0.935702	0.928354	0.977034	0.943241	0.959054	1.02341	0.959396	0.0122515		10	0.910389	0.986523	0.949236	0.957168	0.961343	0.988119	0.912245	0.952146	0.0118822		10	0.966583	0.991555	0.965532	0.966777	0.952068	0.968503	0.00639124		10	1.00149	1.03032	0.966488		0.998754	0.992532	0.997917	0.010198		10	0.989254	0.993072	0.97252		0.993028	0.995857	0.988746	0.00419025
10.0333	0.942179	0.933705	0.923371	0.978756	0.936471	0.949797	1.02467	0.955564	0.0132777		10.0333	0.944081	0.985823	0.949648	0.963422	0.956487	1.00728	0.912723	0.959924	0.0114666		10.0333	0.980359	1.003	0.971925	0.980164	0.955065	0.978102	0.00773948		10.0333	0.99707	1.02553	0.983826		0.99642	0.995791	0.999728	0.00690058		10.0333	0.983414	0.976732	0.986246		0.989713	1.00175	0.987572	0.00413686
10.0667	0.94281	0.92792	0.91757	0.976909	0.938157	0.96256	1.02484	0.955823	0.0137808		10.0667	0.957398	0.989966	0.951977	0.967931	0.956908	1.02194	0.912757	0.965554	0.012812		10.0667	0.979154	0.99913	0.968837	0.963303	0.955695	0.973224	0.00752072		10.0667	1.00019	1.03232	0.995292		1.00593	0.986786	1.0041	0.00772167		10.0667	0.993766	0.992237	0.975149		0.994894	0.997252	0.99066	0.00396297
10.1	0.952891	0.940096	0.930716	0.987895	0.93873	0.977166	1.03025	0.965393	0.0134177		10.1	0.954271	0.992464	0.944793	0.974705	0.959107	0.996249	0.90799	0.961368	0.0114859		10.1	0.972442	0.985801	0.964869	0.971775	0.949295	0.968836	0.00594581		10.1	0.998983	1.02586	0.992209		0.986135	0.984148	0.997467	0.0075562		10.1	0.98652	0.977845	0.977103		0.990084	0.987645	0.98384	0.00266444
10.1333	0.956111	0.941538	0.936718	0.97246	0.914343	0.959031	1.02274	0.957563	0.0129405		10.1333	0.946428	0.994345	0.949636	0.955864	0.963214	1.01257	0.90738	0.961348	0.0129271		10.1333	0.97317	0.988408	0.960219	0.960831	0.949992	0.966524	0.00658983		10.1333	0.992408	1.03515	0.998867		0.992214	0.990183	1.00176	0.00847352		10.1333	0.987448	0.980862	0.993496		0.993348	0.991107	0.989252	0.0023652
10.1667	0.963711	0.942447	0.929099	0.977437	0.925855	0.975	1.02199	0.96222	0.0127054		10.1667	0.937449	0.983464	0.947222	0.969572	0.960805	1.00416	0.911021	0.959099	0.0116068		10.1667	0.987505	0.983705	0.957586	0.957444	0.954646	0.968177	0.00715943		10.1667	0.994428	1.03272	1.00486		0.993652	0.994138	1.00396	0.00748926		10.1667	0.976316	0.982604	0.989246		0.992282	0.988366	0.985763	0.00283398
10.2	0.963712	0.956057	0.916002	0.979288	0.9249	0.96928		0.95154	0.0103697		10.2	0.941796	0.983008	0.94367	0.973909	0.960509	1.0075	0.910176	0.960081	0.0120114		10.2	0.978811	0.984004	0.956974	0.954488	0.962504	0.967356	0.00593836		10.2	0.992193	1.03468	1.00149		0.984278	0.997072	1.00194	0.00866779		10.2	0.984755	1.0039	0.98597		0.985009	0.997153	0.991357	0.00389725
10.2333	0.953144	0.960121	0.927206	0.982875		0.949187		0.954507	0.00897715		10.2333	0.941566	0.991196	0.943998	0.965717	0.955446	1.0064	0.920183	0.960644	0.011295		10.2333	0.974819	0.98511	0.964972	0.966633	0.978992	0.974105	0.00377324		10.2333	0.98966	1.03632	1.00954		0.997808	0.992969	1.00526	0.00846548		10.2333	0.997659	0.993112	0.99583		0.987233	0.990153	0.992798	0.00188251
10.2667	0.952277	0.93758	0.932104	0.974485	0.938405	0.960588		0.94924	0.0066391		10.2667	0.937437	0.998887	0.944855	0.884143	0.951839	1.00234	0.910829	0.94719	0.0162812		10.2667	0.978613	0.996576	0.959002	0.949636	0.985152	0.973796	0.0085838		10.2667	0.991972	1.03333	0.992124		0.998974	1.00288	1.00386	0.0076569		10.2667	0.977216	0.991055	0.99259		0.998329	1.00788	0.993415	0.00501086
10.3	0.956826	0.934642	0.937373	0.977512	0.943629	0.947672		0.949609	0.00643926		10.3	0.938999	1.00279	0.948161	0.969235	0.962686	0.99711	0.905906	0.960698	0.0127283		10.3	0.973053	1.00414	0.951949	0.953575	0.981054	0.972755	0.00963076		10.3	0.991151	1.04237	1.01714		1.00165	1.01243	1.01295	0.00862093		10.3	0.966035	0.994069	0.993969		1.00865	1.00924	0.994393	0.00783679
10.3333	0.957344	0.935128	0.924663	0.961796	0.9289	0.946166		0.942333	0.00622735		10.3333	0.937819	1.00168	0.953835	0.959041	0.95592	1.00496	0.911309	0.960652	0.0126061		10.3333	0.975957	1.01146	0.960652	0.955722	0.982159	0.977189	0.0098355		10.3333	0.986336	1.03904	1.00959		1.0031	1.01173	1.00996	0.00852698		10.3333	0.971858	0.99248	0.999919		0.999989	1.01259	0.995368	0.0067076
10.3667	0.953888	0.916484	0.921826	0.96964	0.944503	0.945926		0.942045	0.00813435		10.3667	0.951454	0.997009	0.964116	0.966075	0.954045	1.00874	0.914982	0.965203	0.0116951		10.3667	0.964355	1.00694	0.964023	0.960045	0.976376	0.974348	0.00859546		10.3667	0.985454	1.04156			0.9971	1.01881	1.01073	0.0123849		10.3667	0.970526	0.997882	0.997726		1.00467	1.01078	0.996316	0.00688656
10.4	0.958437	0.912364	0.931823	0.966925	0.954665	0.956348		0.94676	0.00837373		10.4	0.952146	1.00427	0.950869	0.969563	0.959119	1.01015	0.911812	0.965418	0.012751		10.4	0.978067	1.00165	0.970617	0.965208	0.987192	0.980546	0.00643946		10.4	0.980157	1.03549	1.01071		0.990565		1.00423	0.0121975		10.4	0.987498	0.991336	0.972442		1.00555	1.01356	0.994077	0.00717661
10.4333	0.960721	0.925662	0.944719		0.939383	0.961895		0.946476	0.00680925		10.4333	0.932877		0.958805	0.956824	0.947559	1.01684	0.913178	0.954347	0.0142985		10.4333	0.988517	0.992753	0.966846	0.973485	0.989381	0.982196	0.00507208		10.4333	0.970407	1.03572			0.992505		0.999544	0.0191797		10.4333	0.992547	0.989971	1.00167		1.0123	0.996452	0.998588	0.00395424
10.4667	0.963037	0.933488	0.937215		0.956847	0.967295		0.951577	0.00685428		10.4667	0.942447		0.955789	0.946303	0.9555	1.02404	0.92306	0.957857	0.0141093		10.4667	0.977404	1.00215	0.967873	0.969309	0.981223	0.979591	0.00616105		10.4667	0.971329	1.03526	1.01331		1.00121		1.00528	0.0133313		10.4667	0.984175	0.988494	0.987814		0.998921	1.01055	0.993991	0.0048131
10.5	0.973916	0.923531	0.9217		0.963901	0.964033		0.949416	0.011095		10.5	0.969837		0.954595	0.964764	0.964455	1.03073	0.922929	0.967884	0.0143435		10.5	0.983275	1.00265	0.982165	0.968289	0.989346	0.985146	0.00557112		10.5	0.97515	1.02932			0.999836		1.00144	0.0156585		10.5	0.981171	0.997392	0.980774		1.01205	1.00942	0.996161	0.00667542
10.5333	0.984533	0.92102	0.927617		0.970276	0.97142		0.954973	0.0128056		10.5333	0.957174		0.967531	0.963191	0.956599	1.01628	0.92119	0.963661	0.0124896		10.5333	0.9856	1.01237	0.976729	0.965222	0.989384	0.985862	0.00782569		10.5333	0.971651	1.03249	1.00875		0.997758		1.00266	0.0126243		10.5333	0.986963	0.995398	1.00736		1.01102	1.01238	1.00262	0.00492742
10.5667	0.99353	0.91372	0.942496		0.988512	0.967826		0.961217	0.0148985		10.5667	0.969934		0.971798	0.976023	0.956246	1.01852	0.933921	0.971074	0.0113692		10.5667	0.9816	1.00028	0.975128	0.973136	0.98958	0.983944	0.00499303		10.5667	0.97428	1.02629	1.01382		1.00244		1.0042	0.0111005		10.5667	0.992409	0.996722	1.00314		1.00489	1.00465	1.00036	0.00248094
10.6	0.997549	0.924698	0.928175		0.993126	0.950051		0.95872	0.0155838		10.6	0.964816			0.975849	0.962816	1.01539	0.941351	0.972044	0.0121913		10.6	0.9918	1.00688	0.970637	0.976709	0.990931	0.987392	0.00635067		10.6	0.974432	1.03142	1.00227		0.990612		0.999682	0.012019		10.6	0.986191	1.00479	0.992027		1.00551	1.00008	0.99772	0.00375215
10.6333	0.996547	0.921234	0.922178		0.989636	0.963154		0.95855	0.0160417		10.6333	0.970219		0.990596	1.00088	0.972667	1.01635	0.945071	0.982631	0.0103243		10.6333	0.985178	1.00844	0.992545	0.978482	0.989069	0.990742	0.00500189		10.6333	0.98134	1.03113	1.02573		0.992978		1.00779	0.0121979		10.6333	0.968571	0.992634	0.985316		1.00539	1.00781	0.991943	0.00715229
10.6667	0.998322	0.912128	0.916385		0.9945	0.948799		0.954027	0.0184389		10.6667	0.971492		0.99757	0.910694	0.980526	1.02796	0.938511	0.971125	0.0170622		10.6667	0.993957	1.00506	0.984131	0.979437	0.990113	0.99054	0.00439949		10.6667	0.969895	1.0312			0.998474		0.999856	0.0177107		10.6667	0.984847	1.00007	0.995516		1.00604	1.01676	1.00065	0.0053155
10.7	0.993732	0.923567	0.901843		0.997791	0.964452		0.956277	0.0190081		10.7	0.977719			0.993205	0.971306	1.03163	0.956539	0.986079	0.0128186		10.7	0.990899	1.00187	0.981344	0.976013	0.994672	0.98896	0.00462991		10.7	0.971167	1.02702	1.02		0.99162		1.00245	0.0129336		10.7	0.986838	0.996723	0.986394		1.00576	1.00797	0.996737	0.00454187
10.7333	1.00118	0.928011	0.927954		0.994725	0.95146		0.960666	0.0158469		10.7333	0.98201		1.00072	0.998229	0.978546	1.02377	0.957563	0.990141	0.00925664		10.7333	0.991053	1.00471	0.975465	0.972004	0.989098	0.986466	0.00587781		10.7333	0.972954	1.0265	1.01081		0.991299		1.00039	0.0116393		10.7333	0.995531	0.998601	0.97922		1.01059	1.01174	0.999137	0.00591611
10.7667	0.996871	0.919667	0.931982	0.993101	1.00485	0.968735		0.969201	0.0146593		10.7667	0.961375		0.99584	0.971995	0.97467	1.02623	0.956782	0.981149	0.0105816		10.7667	0.993549	1.00429	0.994803	0.983783	0.988214	0.992928	0.00345575		10.7667	0.974105	1.02222	0.996034		0.981584		0.993487	0.0106048		10.7667	0.985567	0.995613	0.9967		1.01412	1.00548	0.999495	0.00482951
10.8	1.00768	0.921651	0.937357	0.99881	0.994582	0.983345		0.973904	0.0145416		10.8	0.975145		0.999879	0.982255	0.981777	1.03313	0.962752	0.989156	0.010073		10.8	0.986584	1.00689	0.9872	0.988184	0.977522	0.989275	0.00480101		10.8	0.972437	1.02503	1.02049		0.990689		1.00216	0.0124966		10.8	0.999261	0.99413	0.978455		1.00998	1.00509	0.997383	0.00543325
10.8333	1.00067	0.922287	0.914513	1.00654	0.994092	0.966766		0.967477	0.0165159		10.8333			1.00177	0.985623	0.986645	1.02585	0.96122	0.992223	0.0106252		10.8333	0.991717	0.998613	0.976918	0.989136	0.98698	0.988673	0.0035309		10.8333	0.980025	1.03291	1.0085		0.993051		1.00362	0.0113666		10.8333	0.999354	0.988025	0.991175		1.01451	1.00287	0.999187	0.00467481
10.8667	1.00639	0.916809	0.93716	1.00952	0.966969	0.970025		0.967813	0.0150272		10.8667			1.01248	0.965615	0.988641	1.02982	0.976175	0.994547	0.0117799		10.8667	0.981093	1.00805	0.987271	0.985556	0.983005	0.988995	0.00487955		10.8667	0.98336	1.01652	0.995062		0.993943		0.997221	0.00695163		10.8667	0.997069	0.99452	0.99407		1.01635	1.00143	1.00069	0.00412746
10.9	1.00143	0.909291	0.93285	1.01803	0.907722	0.979125		0.958075	0.0195526		10.9			1.00908	0.970313	0.972868	1.03711	0.970735	0.992022	0.0134451		10.9	0.981216	1.01347	0.992633	0.997995	0.981441	0.993352	0.00598374		10.9	0.980586	1.01698	1.01085		0.99591		1.00108	0.00813941		10.9	0.99348	0.992784	0.989107		1.01972	1.00119	0.999256	0.00548021
10.9333	0.998841	0.91747	0.92861	1.02082	0.924732	0.984243	0.983503	0.96546	0.0155663		10.9333	0.974291		1.00935	0.955262	0.977373	1.02561	0.971125	0.985501	0.0107856		10.9333	0.980164	1.00125	0.985305	0.974623	0.988703	0.98601	0.00449432		10.9333	0.992317	1.01607	1.01618		1.00717		1.00793	0.00561718		10.9333	1.00034	0.98901	0.987326		0.996422	1.00467	0.995554	0.00329645
10.9667	0.977962	0.907873	0.948249	1.02098	0.964406	0.973689	1.00244	0.9708	0.0138771		10.9667			1.01014	0.962188	0.977058		0.970135	0.97988	0.010534		10.9667	0.978268	1.01947	0.985626	0.977315	0.98301	0.988739	0.00783331		10.9667	0.994824	1.02549	0.991414		1.00104		1.00319	0.00769399		10.9667	0.99441	0.992471	0.981501		1.00692	0.999622	0.994985	0.00419768
11	1.00676	0.921276	0.941234	1.02327	0.980032	0.983741	0.991038	0.978194	0.0134987		11		1.0399	1.00054	0.972072	0.986618		0.979376	0.9957	0.0120086		11	0.987869	1.01462	0.954852	0.990258	0.98847	0.987215	0.00951257		11	1.00116	1.02046	1.01458		1.01027		1.01162	0.00406287		11	0.997714	0.992664	0.992985		1.01039	1.00115	0.998982	0.00325922
11.0333	1.00853	0.917669	0.949604		0.96778	0.990878	0.989445	0.970652	0.0134855		11.0333		1.03486	0.99193	0.98721	0.987089		0.982322	0.996681	0.00966362		11.0333	0.979069	1.01475		0.992215	0.987674	0.993427	0.00761213		11.0333	1.00246	1.02645	1.00536		1.01392		1.01205	0.00538165		11.0333	0.999574	0.992159	0.987695		1.00405	0.995511	0.995798	0.00284039
11.0667	1.00006	0.929874	0.940083	1.02054	0.956931	0.97817	0.982676	0.972619	0.0122605		11.0667		1.03425	0.992512	0.995694	0.978808		0.980589	0.99637	0.0100184		11.0667	0.988937	1.0153		0.978846	0.980128	0.990803	0.00846876		11.0667	1.00222	1.02771	1.01434		1.01349	1.0003	1.01161	0.00493149		11.0667	0.999186	0.995444	0.971798		1.02231	1.00029	0.997806	0.00803347
11.1	0.985712	0.915182	0.924669	1.0262	0.96613	0.985818	0.983446	0.969594	0.014565		11.1	0.98759		0.995332	0.993043	0.988259	0.930112	0.991189	0.980921	0.0102306		11.1	0.990221	1.00555		0.990872	0.977934	0.991143	0.00564879		11.1	1.00026	1.02893	1.01975		1.02009	0.997456	1.0133	0.00613654		11.1	1.00335	0.993416	0.940144	0.973708	1.01674	1.00333	0.988449	0.0112834
11.1333	1.00262	0.922845	0.939943	1.03479	0.958844	0.973395	1.00961	0.977436	0.0152025		11.1333	0.971233		0.991085	1.00446	0.983476		0.972209	0.984493	0.00620438		11.1333	0.989171	1.01117		0.978855	0.976764	0.988991	0.00787591		11.1333	0.99941	1.02357	1.01696		1.02065	0.984866	1.00909	0.00736791		11.1333	0.979864	0.993797	0.933244	0.973447	0.994754	0.999627	0.979122	0.0100294
11.1667	1.00489	0.922313	0.93874	1.04435	0.98504	0.970879	1.01268	0.982701	0.0161225		11.1667		1.02927	0.993282	1.00532	0.964189		0.992137	0.996839	0.0105456		11.1667	0.983623	1.00693		0.986504	0.968187	0.986312	0.00796326		11.1667	0.987914	1.01844	1.01587		1.02456	0.986088	1.00657	0.00811974		11.1667	0.997641	0.993362	0.958864	0.974596	0.982364	0.990921	0.982958	0.00588233
11.2	1.00741	0.911615	0.939155	1.05271	0.979334	0.971993	1.00005	0.980324	0.0174904		11.2	0.993737	1.03024	0.987153	0.999994	0.967462		0.989615	0.9947	0.00839967		11.2	0.998857	1.01652	0.972913	0.993487	0.967316	0.989818	0.00894445		11.2	0.99615	1.02436	0.992076		1.01772		1.00758	0.00793483		11.2	0.997098	0.996941	0.944854	0.980397	0.969611	0.998544	0.981241	0.00867437
11.2333	0.999819	0.912959	0.948076	1.04623	0.962731	0.982246	1.00729	0.979907	0.0164322		11.2333	1.01973	1.0277	0.984944	1.01058	0.989165		0.989139	1.00354	0.00742834		11.2333	0.991578			0.978435	0.967108	0.979041	0.00707038		11.2333	0.994283	1.02478	0.990226		1.02225		1.00789	0.00907761		11.2333	1.00145	0.994872	0.950823	0.986422	0.99231	1.00134	0.987869	0.00776577
11.2667	0.986756	0.91374	0.936126	1.01305	0.978563	0.979235	1.00059	0.97258	0.0133584		11.2667	1.01338	1.0249	0.986859	1.00476	0.986216		0.981606	0.999619	0.00712201		11.2667	0.993491	1.01213	0.959898	0.985205	0.961909	0.982527	0.00985119		11.2667	1.00674	1.01917	0.990198		1.02376		1.00997	0.00750717		11.2667	0.995799	0.998791	0.963774	0.974545	0.995167		0.985615	0.00695761
11.3	1.00278	0.930051	0.955991	1.05283	0.975647	0.968454	1.00153	0.983898	0.0149634		11.3	1.00171	1.02982	0.987539	0.99674	0.98051		0.990445	0.997795	0.00707176		11.3	1.00422	1.01128		0.996284	0.957801	0.992396	0.011931		11.3	0.994832	1.02593	1.00035		1.02368		1.0112	0.0079499		11.3	1.01069	0.989601	0.966028	0.985028	0.9943	0.982248	0.987982	0.00600475
11.3333	0.998342	0.929248	0.955569	1.0433	0.965728	0.96901	1.00816	0.981337	0.0143271		11.3333		1.02552	0.983168	0.99729	0.963759		0.99149	0.992245	0.0100674		11.3333	1.00516	1.01386		0.997138	0.955736	0.992972	0.0128729		11.3333	0.994135	1.01261	1.00097		1.02413		1.00796	0.00660238		11.3333	0.99901	0.987766	0.965333	0.980451	1.00849	0.983156	0.987368	0.0061454
11.3667	0.983405	0.924292	0.9548	1.04318	0.981887	0.962376	0.973242	0.974741	0.0137221		11.3667	1.00566	1.02302		0.991428	0.96878		0.989567	0.995691	0.00901762		11.3667	1.01411	1.00883	0.963737	0.99676	0.955058	0.9877	0.0119709		11.3667	1.00048	1.02243	1.00693		1.02201		1.01296	0.00550527		11.3667	0.993359	0.980858	0.957728	0.978334	1.00466	0.995292	0.985038	0.0067516
11.4	0.993666	0.925914	0.95135	1.04974	0.970748	0.943553	1.00022	0.976456	0.0158348		11.4	0.999156	1.02948		0.995801	0.968457		0.986982	0.995974	0.00992618		11.4	0.997104	1.00475		0.997084	0.947844	0.986695	0.0130752		11.4	1.00178	1.02515	0.985907		1.0224		1.00881	0.00924488		11.4	1.00313	0.984411	0.960007	0.975169	1.01036	0.991399	0.987414	0.00752731
11.4333	0.975093	0.917824	0.953894	1.04259	0.978812	0.977024	0.987012	0.976035	0.0141741		11.4333	1.01226	1.03297	0.979632	0.993005	0.989119		0.980391	0.997895	0.00851874		11.4333	1.00931			0.998085	0.951511	0.986303	0.0176953		11.4333	1.00356	1.02363	1.01232		1.02249		1.0155	0.00472244		11.4333	0.992517	0.985458	0.977163	0.990149	1.00046	0.989343	0.989182	0.00314977
11.4667	0.968321	0.916229	0.953298	1.04909	0.974773	0.97537	0.995748	0.976119	0.0153383		11.4667	0.996487	1.03324		0.990646	0.99108		0.987162	0.999724	0.00851176		11.4667	1.02031	1.00049		0.996858	0.951678	0.992332	0.014498		11.4667	1.00105	1.02517	0.991434		1.02082		1.00962	0.00801732		11.4667	1.00327	0.986967	0.964804	0.987253	0.993224	0.985211	0.986788	0.00516105
11.5	0.975112	0.924516	0.970899	1.05084	0.970699	0.982365	0.985004	0.979919	0.0140747		11.5	0.988699	1.03525	0.984364	0.98317	0.984469	0.928183	0.986074	0.984316	0.0117197		11.5	1.01952	0.9999		1.00056	0.955362	0.993837	0.0136078		11.5	1.00611	1.02698	1.00284		1.02129		1.0143	0.00583204		11.5	0.992186	0.989538	0.967135	0.999105	1.00339	0.990535	0.990315	0.0051306
11.5333	0.973207	0.920528	0.950446	1.04258	0.946821	0.979778	0.979699	0.970437	0.0145024		11.5333	0.99971	1.03552	0.996063	0.997282	0.992577	0.978756	0.987444	0.998193	0.00677117		11.5333	1.00286	0.986955		1.00164	0.945354	0.984201	0.0134437		11.5333	1.00978	1.01492	0.991403		1.01681		1.00823	0.00580209		11.5333	0.991907	0.98838	0.972426	0.987013	1.00308	0.990421	0.988871	0.00403174
11.5667	0.98607	0.912003	0.95092	1.04342	0.974336	0.971256	0.993815	0.975975	0.0152086		11.5667	0.992425	1.03291	0.999408	0.987821	0.991125	1.00746	0.988027	0.999882	0.00610785		11.5667	1.01074	0.986645		1.00135	0.954018	0.988189	0.0124227		11.5667	1.0077	1.01866	0.988296		1.01298		1.00691	0.00659548		11.5667	0.986383	0.994434	0.957866	0.98865	1.00356	0.992646	0.987257	0.00635846
11.6	0.982805	0.90637	0.953921	1.04651	0.959521	0.985885	1.00967	0.977811	0.0167853		11.6	1.0002	1.03085	0.999343	0.984096		1.01999	0.996504	1.00517	0.00696925		11.6	0.99486	0.99254		1.00203	0.953808	0.98581	0.0108567		11.6	1.00171	1.01951	0.962342		1.01922		1.0007	0.0134448		11.6	0.991073	1.0031	0.967336	0.988723	1.00305	0.988614	0.990317	0.00535354
11.6333	0.997242	0.914637	0.963384	1.03772	0.951143	0.97818	0.983773	0.975154	0.0145269		11.6333	0.986288	1.03146	1.00486	0.989694		0.993362	0.990538	0.999368	0.00692587		11.6333	1.00286	0.992551		0.996737	0.961102	0.988313	0.00931426		11.6333	1.00066	1.01985	0.987556		1.01494		1.00575	0.00730386		11.6333	0.990114	0.999388	0.960293	0.98996	1.00798	0.93433	0.980344	0.0113044
11.6667	1.0131	0.923659	0.959875	1.04306	0.959102	0.987599	0.999922	0.98376	0.014995		11.6667	1.00048	1.027	0.996371	1.00633		1.01442	1.001	1.0076	0.00463554		11.6667	1.00115	0.992659		0.991506	0.969716	0.988757	0.00670094		11.6667	0.999841	1.00659	0.983545		1.01602		1.0015	0.00684233		11.6667	0.993151	0.996189	0.976547	0.998063	1.00958	0.982398	0.992655	0.00480682
11.7	1.00543	0.916582	0.961323	1.04812	0.988527		0.971518	0.981917	0.018056		11.7	1.00347	1.02689	0.985323	0.999946		1.00155	1.00025	1.0029	0.00548399		11.7	1.00005	1.00097		0.994977	0.972388	0.992095	0.00669962		11.7	1.00293	1.01444	0.99228	0.946596	1.01984		0.995216	0.0130532		11.7	0.990445	0.991129	0.961378	0.986873	1.00906	0.980986	0.986645	0.00634393
11.7333	1.0009	0.919635	0.953746	1.03916	0.982362	0.977874	0.987559	0.980177	0.0140892		11.7333	0.995	1.02652	0.980813	0.995915		1.0176	1.00124	1.00285	0.00677165		11.7333	0.998528	1.01074		0.999322	0.983937	0.998132	0.00549294		11.7333	0.9968	1.02357	0.994653		1.01488		1.00748	0.00702543		11.7333	0.995935	0.990558	0.974356	0.993531	0.998586	0.982286	0.989209	0.00375142
11.7667	1.00173	0.934456	0.961097	1.03411	0.982862		0.98349	0.982957	0.013904		11.7667	1.01836	1.03366	0.97378	1.01175			1.00948	1.0094	0.00985675		11.7667	1.00097	1.01982		1.00037	0.989912	1.00277	0.00622588		11.7667	0.999571	1.01256	0.996078	0.949106	1.01405		0.994272	0.0118253		11.7667	1.00076	0.989446	0.986054	0.989613	1.0016	0.980449	0.99132	0.00340142
11.8	1.00693	0.933268	0.960961	1.03835	0.977564		0.987631	0.984116	0.0148755		11.8	1.00652	1.03081	0.98506	1.00643		1.01737	0.996998	1.0072	0.00647129		11.8	1.0106	1.01873		0.989141	0.990815	1.00232	0.00732508		11.8	0.992997	1.0157	1.0035	0.953568	1.00623		0.9944	0.0108302		11.8	0.994323	0.988488	0.959409	0.998017	0.987622	0.93716	0.977503	0.00980099
11.8333	1.00999	0.92866	0.961467	1.04102	0.970117		0.988481	0.98329	0.0160282		11.8333	1.01175	1.03321	0.975349	1.00946		1.02157	1.00122	1.00876	0.00805022		11.8333	1.00517	1.01928		0.98876	0.992663	1.00147	0.00689212		11.8333	0.988205	1.02104	1.00229	0.9566	1.01261		0.99615	0.0113041		11.8333	0.998304	0.991817	0.962243	0.997996	0.982622	0.968073	0.983509	0.00629576
11.8667	1.00084	0.939295	0.953674	1.0238	0.982263	0.983503	0.98757	0.981563	0.0106458		11.8667	1.01112	1.02887	0.991652	1.00491		1.02891	0.995677	1.01019	0.00653836		11.8667	1.00155	1.0215		0.996157	0.999526	1.00468	0.00571518		11.8667	0.988275	1.0224	1.00485	0.961016	1.0103		0.997369	0.0106163		11.8667	0.979558	0.989812	0.975306	1.00544	0.985861	0.974252	0.985038	0.0047633
11.9	0.984447	0.950807	0.946677	1.04797	0.987943	0.988259	0.975021	0.983017	0.0126247		11.9	1.00782	1.0288	0.97878	1.00713		1.00596	0.992227	1.00345	0.00687046		11.9	1.00209	1.02301		0.985179	0.992921	1.0008	0.00817111		11.9	0.985582	1.01592	0.984872	0.952641	1.01671		0.991143	0.0118741		11.9	0.997526	0.992966	0.961658	1.00557	0.99385	0.983256	0.989138	0.00623679
11.9333	0.993793	0.952758	0.954778	1.04212	0.879502	0.973683	0.979654	0.968041	0.0186229		11.9333	1.02449	1.03833	0.988795	1.00762		1.01836	1.00287	1.01341	0.00711462		11.9333	1.01549	1.02684		0.998785	0.992653	1.00844	0.00780276		11.9333	0.983536	1.01524	1.00003	0.963709	1.00943		0.994389	0.00935901		11.9333	0.9931	0.99757	0.963984	1.00924	0.99406	0.972971	0.988486	0.00684711
11.9667	0.965809	0.95347	0.956181	1.04551	0.970367		0.97784	0.978197	0.0139554		11.9667	1.03064	1.03407	0.985166	1.01259		1.01157	1.00474	1.01313	0.00730396		11.9667	1.01317	1.02729		0.993127	0.991176	1.00619	0.00861146		11.9667	0.978963	1.02968	0.979103	0.969226	1.0077		0.992935	0.0112182		11.9667	0.994644	0.991313	0.962381	0.972521	0.998696	0.969827	0.981564	0.00618371
12	0.979492	0.95956	0.961112	1.04171	0.989662	0.981839	0.963163	0.982363	0.0108281		12	1.02715	1.0308	0.983978	1.01844		1.00247	1.00588	1.01145	0.00715532		12	1.01325	1.01933		0.990704	0.993253	1.00413	0.00714638		12	0.980997	1.03101	0.998142	0.97146	0.997658		0.995854	0.0101498		12	0.991947	0.990894	0.990234	0.998259	0.999896	0.986185	0.992902	0.00211977
12.0333	0.989697	0.95706	0.959978	1.05116	0.978459	0.991934	0.985988	0.987754	0.0117971		12.0333	1.01653	1.02158	0.985896			1.00432	1.00774	1.00721	0.00614929		12.0333	1.00456	1.01879		0.995112	0.991727	1.00255	0.00605784		12.0333	0.985847	1.03371	0.987789	0.970621	1.00269	0.984741	0.994234	0.00892527		12.0333	0.998552	0.991016	0.996149	1.00973	0.997288	0.982677	0.995902	0.00364689
12.0667	0.971318	0.963612	0.96508	1.04464	0.981189		0.980866	0.984451	0.0124203		12.0667	1.01923	1.02575	0.983115	1.0112		1.02442	1.01301	1.01279	0.0063974		12.0667	1.01494	1.01808		0.993344	0.99157	1.00448	0.00698291		12.0667	0.991283	1.02415	0.978319	0.963506	1.00184	0.984875	0.990663	0.00850569		12.0667	0.986003	0.990251	0.993585	1.00662	0.998362	0.98291	0.992956	0.00352629
12.1	0.977657	0.970846	0.964614	1.05125	0.974802	0.984137	0.966837	0.984306	0.0114329		12.1	1.02719	1.02525	0.987337	1.01461		1.00623	1.00053	1.01019	0.00623539		12.1	1.01693	1.00937		0.990285	0.98958	1.00154	0.00687909		12.1	0.990854	1.0223	0.986274	0.969668	1.00311	0.991455	0.993944	0.00719285		12.1	0.997873	0.990835	0.986245	0.999118	1.00184	0.942094	0.986334	0.00915507
12.1333	0.983862	0.964605	0.969991	1.04995	0.983591	0.983344	0.970677	0.986574	0.0109692		12.1333	1.01974	1.03108	0.975951			1.01358	0.999647	1.008	0.00948254		12.1333	1.00113	1.01251		0.996678	0.992557	1.00072	0.0043034		12.1333	1.00286	1.03805	1.00312	0.968939	1.00368	0.984024	1.00011	0.0094851		12.1333	1.00007	0.990394	0.996919	1.0017	0.999716	0.947284	0.989346	0.00856884
12.1667	0.987323	0.971835	0.966586	1.05272	0.976774	0.992679	0.982801	0.990102	0.0109683		12.1667	1.01854	1.02241	0.984303	1.01433		1.01453	1.00186	1.00933	0.00574454		12.1667	1.01184	1.01253		0.993016	0.986108	1.00087	0.00668284		12.1667	0.998929	1.01267	0.983761	0.96819	1.00577	0.948457	0.986296	0.0100004		12.1667	1.00999	0.995476	0.996587	0.995458	1.00559	0.959956	0.993844	0.00721112
12.2	0.98044		0.959026	1.04426	0.98347	0.985079	0.988161	0.990073	0.011641		12.2	1.03022	1.02998	0.979362	1.00861		1.01443	0.990533	1.00886	0.00844474		12.2	1.01769	1.01892		0.993548	0.99241	1.00564	0.00731972		12.2	1.00108	1.02048	0.978647	0.964653	1.00954	0.981718	0.992688	0.00862279		12.2	0.997468	0.989615	0.983803	0.98829	1.00211	0.98034	0.990272	0.00335098
12.2333	0.964887		0.960269	1.04477	0.890903	0.972721	0.970118	0.967277	0.0199417		12.2333	1.02827	1.02738	0.975134	1.01408		1.00778	0.987618	1.00671	0.0087736		12.2333	1.00322	1.01396		0.986549	0.992598	0.999082	0.00603879		12.2333	1.00448	1.03714	1.00487	0.967808	1.01112	0.979613	1.00084	0.00999065		12.2333	1.00236	0.987897	0.982305	1.00371	1.00478	0.982484	0.993922	0.00442323
12.2667	0.963793		0.968633	1.0399	0.96515	0.97423	0.981066	0.982128	0.0118423		12.2667	1.02243	1.0238	0.973861	1.01251		1.00693	0.998521	1.00634	0.00756741		12.2667	1.01558	1.00212		0.994057	0.993163	1.00123	0.00519041		12.2667	1.00828	1.03014	1.00839	0.965954	1.01594	0.980631	1.00155	0.00969693		12.2667	0.998709	0.98926	0.997032	0.992358	1.00757	0.960415	0.990891	0.0066096
12.3	0.980084		0.971035	1.04499	0.976917	0.989982	0.976706	0.989953	0.0112991		12.3	1.02648	1.02705	0.973176	1.02012		1.016	0.991645	1.00908	0.00892275		12.3	1.01407	1.01592		0.987365	0.994595	1.00299	0.00709801		12.3	0.994751	1.03011	1.0064	0.961129	1.00993	0.977893	0.996701	0.0100132		12.3	1.00297	0.987684	0.975945	0.990502	1.01541	0.968978	0.990248	0.00697262
12.3333	0.977858		0.970609	1.04037	0.981746	0.978021	0.969978	0.98643	0.010949		12.3333	1.02318	1.02374	0.968995	1.01942		1.00791	0.994781	1.00634	0.00873341		12.3333	1.00996	1.0097		0.982202	1.00011	1.00049	0.00651343		12.3333	0.990004	1.02499	0.997662	0.961298	1.01284	0.983557	0.995058	0.00915848		12.3333	0.993086	0.987968	0.982334	0.989305	1.01314	0.95876	0.987431	0.00717522
12.3667	0.983992		0.963531	1.04322	0.976168	0.981827	0.980436	0.988196	0.0114006		12.3667	1.01777	1.02713	0.957073	1.01278		1.01005	1.00539	1.00503	0.0100601		12.3667	1.00912	1.01114		0.984963	0.993982	0.999802	0.00625494		12.3667	1.0072	1.01885	1.00758	0.971879	1.01731	0.977757	1.0001	0.00826556		12.3667	0.994772	0.998622	0.996448	1.0037	1.00855	0.968435	0.995087	0.00571602
12.4	0.970769		0.965404	1.04541	0.983059	0.995842	0.960558	0.98684	0.0128244		12.4	0.998909	1.02142	0.962629	1.00706		1.00948	1.00189	1.00023	0.00816361		12.4	1.00204	1.01532		0.98947	1.00122	1.00201	0.00528426		12.4	1.00464	1.01637	1.00932	0.962211	1.01566	0.98065	0.998144	0.00895102		12.4	0.992571	0.995115	0.979968	1.00483	1.01535	0.968292	0.992688	0.00688955
12.4333	0.963604		0.965587	1.04061	0.950939	0.990066	0.97719	0.981332	0.0130292		12.4333	1.00935	1.02816	0.963937	1.01522		1.01158	1.0021	1.00506	0.00893989		12.4333	1.01019	1.01241		0.981916	0.996228	1.00019	0.00706488		12.4333	1.007	1.02552	1.00323	0.968372	1.01392	0.977435	0.999245	0.00896369		12.4333	1.00007	1.0014	0.994245	1.003	1.00705	0.973293	0.996511	0.0049465
12.4667	0.972843		0.964774	1.04329	0.998285	0.987728	0.952783	0.986618	0.0131165		12.4667	1.02193	1.02878	0.959684	1.00992			1.01578	1.00722	0.0122919		12.4667	1.00114	1.0088		0.979389	0.99823	0.996889	0.00624454		12.4667	1.00206	1.02766	1.00602	0.962244	1.01256	0.954491	0.994171	0.0119107		12.4667	0.993404	0.999687	0.98638	0.991821	1.01821	0.972465	0.99366	0.00617658
12.5	0.963359		0.96798	1.04623	1.00271	0.995319	0.973581	0.991529	0.0126515		12.5	1.01478	1.03989	0.973817	1.01639		1.00898	1.01178	1.01094	0.00868992		12.5	1.01038	1.01619		0.989688	1.00632	1.00565	0.00569158		12.5	0.998012	1.02295	1.00924	0.96923	1.01599	0.937862	0.992214	0.0133117		12.5	0.985736	1.00155	0.997941	0.991046	1.01226	0.965452	0.99233	0.00653487
12.5333	0.983365		0.961749	1.04619	0.996131	0.986068	0.975042	0.991424	0.0119223		12.5333	1.02757	1.03339	0.984212	1.02136		1.01829	0.998848	1.01395	0.00763703		12.5333	1.00142	1.01907		0.99005	0.997962	1.00212	0.0061278		12.5333	1.00874	1.02276	1.0041	0.966937	1.00494	0.954702	0.993698	0.0108666		12.5333	0.990772	0.997511	0.979957	0.991622	1.00588	0.968157	0.988982	0.00542668
12.5667	0.975837		0.961483	1.04892	0.991295	0.973927	0.972307	0.987295	0.0129291		12.5667	1.01809	1.04292	0.972981	1.01982		1.01201	0.99931	1.01086	0.00953889		12.5667	0.995744	1.01611		0.976495	1.00754	0.998971	0.00857624		12.5667	1.00951	1.02569	0.99476	0.968065	1.00672	0.939361	0.990685	0.0129091		12.5667	0.987209	1.00024	0.97827	1.00135	1.01521	0.962788	0.990846	0.00763994
12.6	0.984074		0.968556	1.04499	1.00227	0.985917	0.98298	0.994796	0.0109495		12.6	1.01717		0.994836	1.00539		1.01889	0.995112	1.00628	0.00516763		12.6	0.999982	1.00959		0.991138	1.00615	1.00172	0.00404736		12.6	1.00419	1.02471	0.999464	0.963897	1.01808	0.965016	0.995893	0.0106168		12.6	0.982458	0.996644	0.988275	0.994452	1.01071	0.965747	0.989714	0.0061651
12.6333	0.967942		0.958205	1.04817	1.00079	0.990171	0.975543	0.990137	0.013174		12.6333	1.02812		0.997756	1.00912		1.02507	1.00912	1.01384	0.00562788		12.6333	0.994832	1.01925		0.995952	1.00707	1.00428	0.0057046		12.6333	1.00131	1.03736	0.995614	0.966949	1.01371	0.95313	0.994678	0.0125483		12.6333	0.992571	0.998233	0.971675	1.00319	1.00839	0.96557	0.989938	0.00711604
12.6667	0.979292		0.956763	1.04291	1.00099	0.976379	0.96115	0.986247	0.0130038		12.6667	1.01218		0.999272	0.980818		1.00868	1.00111	1.00041	0.00544298		12.6667	0.983945	1.0106		0.983751	1.00862	0.996729	0.00744775		12.6667	1.00523	1.02472	0.99918	0.957488	1.00874	0.958239	0.992266	0.011413		12.6667	0.99728	0.997701	0.956197	1.00222	1.00523	0.963771	0.987068	0.00870396
12.7	0.988415		0.961253	1.04635	1.00751	0.995962	0.981302	0.996798	0.0117536		12.7	1.01618		1.00096	0.986719		1.01836	0.997191	1.00388	0.00595335		12.7	1.00085	1.01222		0.989592	1.00048	1.00079	0.00461919		12.7	1.00609	1.0286	0.995914	0.970474	1.01402	0.846977	0.977012	0.0271941		12.7	0.995687	0.990511	0.970486	1.00723	1.01133	0.960434	0.98928	0.00823889
12.7333	0.989059		0.956554	1.03767	0.989593	0.970156	0.977563	0.986766	0.0113696		12.7333	1.01219		1.00316	0.970858		1.02824	0.993323	1.00155	0.00958572		12.7333	1.00772	1.01067		0.990837	1.0025	1.00293	0.00437135		12.7333	0.997235	1.02393	1.01109	0.970702	1.01128	0.830464	0.974117	0.0296714		12.7333	0.995277	0.991985	0.964303	1.0087	1.01169	0.962193	0.989023	0.00871683
12.7667	0.972637		0.955526	1.05047	1.00873	0.989042	0.984811	0.993535	0.0134783		12.7667	1.01657		0.99552	0.973522		1.00909	1.0091	1.00076	0.00761005		12.7667	1.00847	1.00208		0.996754	1.007	1.00358	0.00265269		12.7667	1.00906	1.03169	0.999541	0.972762	1.00689	0.958215	0.996359	0.0108665		12.7667	0.984722	0.989299	0.970362	1.00477	0.996324		0.989096	0.00577985
12.8	0.978449		0.953752	1.03999	1.00086	0.983445	0.983655	0.990025	0.0117585		12.8	1.01381		0.98885	0.990049			0.998832	0.997885	0.00575505		12.8	1.00747	1.00544		0.994316	1.00668	1.00348	0.00308208		12.8	1.01308	1.02341	1.00735	0.969446	1.01463	0.970378	0.999716	0.00965693		12.8	0.991876	0.996674	0.970607	1.00633	1.00738	0.96606	0.98982	0.00722405
12.8333	0.988634		0.965223	1.04738	1.004	0.994581	0.977513	0.996222	0.0116176		12.8333	1.00953		0.993062	0.974589		1.0122	1.00253	0.998382	0.00680755		12.8333	1.00347	1.0109		1.00059	1.00781	1.00569	0.00228428		12.8333	1.00832	1.02889	1.01343	0.969826	1.01846	0.959894	0.999803	0.0114653		12.8333	0.9905	1.00214	0.976804	1.01158	1.00375	0.966105	0.991812	0.00713597
12.8667	0.998064		0.963787	1.04756	1.00527	0.981818	0.989632	0.997689	0.0115626		12.8667	1.01253		0.984663	0.969488		1.00714	0.989413	0.992646	0.00779711		12.8667	1.00681	1.00571		0.997763	1.00432	1.00365	0.00202763		12.8667	1.0015	1.02293	1.00454	0.966032	1.01537	0.958267	0.994773	0.0108266		12.8667	0.991836	1.005	0.979815	1.00402	1.00021	0.96178	0.990443	0.00689936
12.9	0.992259		0.963364	1.04304	1.00958	0.983471	0.98741	0.996521	0.0111138		12.9	1.0134		0.9862	0.975772		1.01266	0.98793	0.995193	0.00757434		12.9	1.00042	1.00154		1.00918	1.00101	1.00304	0.00205954		12.9	1.00174	1.02267	1.00307	0.968435	1.02405	0.936848	0.992802	0.0138784		12.9	0.991616	1.00242	0.976404	1.00816	1.00941		0.997601	0.00616073
12.9333	1.00083		0.965638	1.05031	1.01349	0.965207	0.981781	0.996208	0.0133545		12.9333	1.00269		0.98737	0.966385		1.00592	0.994234	0.99132	0.00702962		12.9333	1.00658	1.00933		1.00143	1.00368	1.00525	0.0017182		12.9333	1.00428	1.02892	1.01248	0.97198	1.00403	0.951796	0.995581	0.011573		12.9333	0.991851	1.00115	0.995465	1.00724	1.0157	0.964398	0.995967	0.00720435
12.9667	1.00587		0.962803	1.04966	1.00754	0.976892	0.979977	0.997124	0.0126843		12.9667	1.00659		0.99263	0.982041		1.00406	0.986604	0.994385	0.00478857		12.9667	1.00715	1.00953		1.00769	1.01026	1.00866	0.000737957		12.9667	1.00557	1.02255	1.00812	0.974005	0.99824	0.957309	0.9943	0.00985238		12.9667	0.986357	1.00182	0.99489	1.00943	1.00969		1.00044	0.00445773
13	0.98088		0.964989	1.04555	1.01062	0.990995	0.977479	0.995086	0.011864		13	0.997938		1.0077	0.990107		1.00209	0.993921	0.998351	0.00307476		13	1.00238	1.01466		1.00149	1.00973	1.00706	0.00313242		13	0.993351	1.01934	0.920003	0.975801	1.00614	0.943369	0.976333	0.0155854		13	0.982863	0.998452	0.985733	1.00437	1.01174		0.996633	0.00547694
13.0333	0.991214		0.958152	1.04497	1.01314	0.977445	0.98455	0.994912	0.0124036		13.0333	0.986313	1.04542	1.00209	0.997208		1.0066	0.986895	1.00409	0.00890289		13.0333	0.989507	1.01206		1.01052	1.01311	1.0063	0.00562274		13.0333	1.00771	1.01721	0.956434	0.979947	1.02269	0.796262	0.963376	0.0349436		13.0333	0.987755	0.994616	0.981122	1.00733	1.01795	0.958633	0.991235	0.00848841
13.0667	1.00124		0.96762	1.04796	1.02476	0.981427	0.978709	1.00028	0.012597		13.0667	0.988746	1.04009	1.01132	0.994454		1.01007	0.978268	1.00382	0.00890412		13.0667	0.983162	1.00927		1.00485	1.01123	1.00213	0.00646159		13.0667	1.00926	1.03176	0.911743	0.964745	1.0242	0.948335	0.981675	0.0194651		13.0667	0.976732	0.996786	0.979998	0.996955	1.006	0.95569	0.985361	0.00747145
13.1	0.988518		0.92254	1.05722	1.01354	0.9705	0.980828	0.988858	0.0183326		13.1	0.976215	1.03208	0.996482	0.99438		1.01853	0.985483	1.00053	0.008546		13.1	0.985654	1.01128		1.01259	1.00483	1.00359	0.00621474		13.1	1.00019	1.02628	0.923523	0.979136	1.02842		0.99151	0.0192639		13.1	0.981769	0.996508	0.982862	0.987855	1.01415	0.957291	0.986739	0.00764809
13.1333	1		0.936551	1.06466	1.00983	0.99432	0.981392	0.997793	0.0169832		13.1333	0.993537	1.02999	1.00501	0.991263		1.01279	0.985335	1.00299	0.00675209		13.1333	0.990973	1.01241		1.0112	0.998958	1.00339	0.00513315		13.1333	0.996385	1.02547	0.990867	0.967514	1.03033	0.977517	0.998014	0.0103315		13.1333	0.981522	0.988534	0.97445	0.993054	1.01527		0.990565	0.00693531
13.1667	0.995921		0.942249	1.04497	1.00683	0.982825	0.980227	0.99217	0.0138307		13.1667	0.952967	1.02489	1.00257	1.00038		1.00435	0.981049	0.994369	0.0100434		13.1667	0.990351	1.00609		1.00752	1.00655	1.00263	0.00410308		13.1667	0.98947	1.03367	1.00119	0.968959	1.01745	0.966437	0.996196	0.0108836		13.1667	0.966828	0.994766	0.968414	0.997598	1.01299		0.988119	0.00892754
13.2	0.999339		0.949171	1.05817	1.01519	0.993697	0.980095	0.999277	0.0148677		13.2	0.984028	1.01704	0.988223	0.994415		1.00849	0.984326	0.996087	0.0056011		13.2	0.997015	1.01562		1.01201	1.01295	1.0094	0.00419747		13.2	0.997144	1.02817	1.0064	0.967496	1.01898	0.986108	1.00072	0.00903562		13.2	0.976152	0.985567	0.978754	0.983218	1.0126		0.987258	0.00654617
13.2333	0.991353		0.953732	1.0482	1.0192	0.998044	0.983287	0.99897	0.0131458		13.2333	0.962768	1.00974	0.988024	0.99395		1.00607	0.977819	0.989728	0.00720398		13.2333	0.992487	1.0068		1.01715	1.01267	1.00727	0.00536483		13.2333	0.993743	1.03266	1.00374	0.968565	1.02279	0.978273	0.999962	0.0101641		13.2333	0.975275	0.99628	0.993489	0.990429	1.00814		0.992721	0.00529378
13.2667	0.964185			1.05309	1.00899	0.988492	0.986156	1.00018	0.0150105		13.2667	0.962617	0.995405	0.986793	0.997445			0.99198	0.986848	0.00632061		13.2667	0.993808	1.00809		1.02135	1.00602	1.00732	0.00563987		13.2667	0.992964	1.02739	1.01312	0.965814	1.02141	0.969412	0.99835	0.0108287		13.2667	0.963753	0.995458	0.98201	0.987782	1.01448	0.949519	0.982168	0.00941196
13.3	1.01344			1.05301	0.927587	0.992813	0.998495	0.99707	0.0203049		13.3	0.983629	1.0168	0.992494	0.991966		1.00096	0.993712	0.996594	0.00462623		13.3	0.99309	1.00288		1.02267	1.00511	1.00594	0.00615886		13.3	0.99527	1.02743	0.986006	0.955219	1.01677	0.98615	0.994474	0.0104337		13.3	0.961092	0.9861	0.995589	0.985913	0.999114		0.985561	0.00664612
13.3333	1.00192			1.04889	1.01884	1.00284	0.992201	1.01294	0.0099513		13.3333	0.983498	1.01895	1.00107	1.01318		1.00379	0.994878	1.00256	0.0051876		13.3333	1.00141	1.00013		1.02935	1.00384	1.00868	0.00693207		13.3333	0.981254	1.01202	1.00362	0.957283	1.02014	0.985816	0.993355	0.00944389		13.3333	0.976418	0.995471	1.01077	0.991794	0.981811		0.991254	0.0059513
13.3667	1.00306			1.04786	1.00101	0.999305	0.992401	1.00873	0.00994622		13.3667	0.997192	1.01107	1.0088	1.00238		0.994429	0.989455	1.00055	0.00343414		13.3667	0.995272	1.00237		1.03495	1.00724	1.00996	0.00868576		13.3667	1.00101	1.01728	1.01293	0.956006	1.02143	0.983547	0.998699	0.0102011		13.3667	0.977536	0.998214	0.971804	0.980365	0.977199		0.981024	0.00451521
13.4	1.00065			1.05812	1.00086	0.99374	0.997092	1.01009	0.0120779		13.4	0.986318		1.00803	1.00492		0.992028	0.984348	0.995129	0.00482611		13.4	0.963101	1.00639		1.03613	0.998051	1.00092	0.015023		13.4	0.983206	1.01859	1.00166	0.961445	1.02995	0.982935	0.996299	0.0103651		13.4	0.982925	0.995949	0.977592	1.00082	0.985572		0.988571	0.00427683
13.4333	1.00628			1.05535	0.989934	1.00324	1.00728	1.01242	0.0111739		13.4333	0.97852		1.01329	0.996487			0.997523	0.996456	0.00710865		13.4333	0.982377	1.00046		1.02929	0.989347	1.00037	0.010334		13.4333	0.987623	1.00856	1.00698	0.957006	1.0249	0.97252	0.99293	0.0103259		13.4333	0.964367	0.985067	0.999501	0.990223	0.991575		0.986147	0.00591586
13.4667	1.00941			1.05455	0.997284	0.995005	1.00826	1.0129	0.0107991		13.4667			1.00972	1.00655		1.00252	0.998721	1.00438	0.00239198		13.4667	0.986505	0.999516		1.02703	0.994869	1.00198	0.00877295		13.4667	0.994574	1.00798	0.977037	0.947895	1.02017	0.97167	0.986553	0.0107389		13.4667	0.979528	0.994635	0.981155	0.990628	0.982153	0.883138	0.968539	0.0172507
13.5	1.00755			1.05255	0.98933	0.994907	1.00725	1.01032	0.0111322		13.5	0.997651		1.01395	0.998074		0.985389	0.982267	0.995466	0.00560745		13.5	0.98399	1.01042		1.03229	0.986791	1.00337	0.0113157		13.5	0.990147	1.0001	0.994672	0.952915	1.01626	0.974077	0.988028	0.00897974		13.5	0.982371	0.996532	0.989099	1.00446	1.00029	0.938114	0.985144	0.00994545
13.5333	0.993596			1.05576	0.987855	1.01109	0.994863	1.00863	0.0123989		13.5333	1.00069		1.01234	1.00731			1.00632	1.00666	0.00238959		13.5333	1.00801	1.00821		1.03622	0.996466	1.01222	0.0084562		13.5333	0.978299	0.985464	1.00358	0.958113	1.01849	0.975356	0.986551	0.00878209		13.5333	0.980614	0.999072	0.982802	0.999405	0.98989	0.965582	0.986228	0.00523292
13.5667	1.01085			1.06041	0.992749	1.00029	1.00955	1.01477	0.0118752		13.5667	0.989221		1.01344	1.00697		1.00119	0.987787	0.999721	0.00497763		13.5667	0.977744	1.00522		1.01542	0.983765	0.995536	0.00886979		13.5667	0.987354	0.990226	1.01274	0.956788	1.01301	0.979115	0.989872	0.0087081		13.5667	0.987138	0.990633	0.977757	0.996216	0.980386	0.942026	0.979026	0.00789194
13.6	1.00869			1.05856	1.0055	0.997563	1.01408	1.01688	0.0107591		13.6	0.99704		1.017	1.00169		1.00442	0.999728	1.00398	0.00347181		13.6	1.00108	1.01004		1.02595	0.990358	1.00686	0.0075296		13.6	0.994084	0.988184	0.991368	0.95077	1.0193	0.975787	0.986581	0.00922116		13.6	0.990139	0.995557	0.970146	0.991768	0.984723	0.944299	0.979439	0.00790648
13.6333	1.00909			1.05352	0.920254	0.989832	1.00926	0.996393	0.0217153		13.6333	0.992679		1.01714	1.00305		1.01189	1.00124	1.0052	0.0042679		13.6333	1.0117	1.01145	1.00297	1.01374	0.981388	1.00425	0.00600744		13.6333	0.991188	0.989658	0.995796	0.955024	1.02007	0.9831	0.989139	0.00857451		13.6333	0.989649	0.993624	0.979379	0.993921	0.977825	0.932105	0.97775	0.00955895
13.6667	0.981085			1.0585	0.990612	0.989788	1.01558	1.00711	0.0140751		13.6667	1.00811		1.0285	0.997072		1.01247	1.00331	1.00989	0.00530941		13.6667	1.01327	1.00903	1.01003	1.00798	0.974687	1.003	0.00713338		13.6667	0.993563	0.987091	1.00736	0.957287	1.0181	0.987446	0.991809	0.00850381		13.6667	0.979607	0.987464	0.982891	0.996014	0.980793	0.961729	0.981416	0.00462998
13.7	0.999813			1.06429	0.958096	0.989946	1.01361	1.00515	0.0173816		13.7	1.00109	1.00732	1.0199	0.995908			1.00203	1.00525	0.00408624		13.7	1.0115	1.01237	1.01932	1.0122	0.975692	1.00622	0.00776258		13.7	0.993446	0.99177	0.99464	0.960614	1.01928	0.977809	0.989593	0.00796827		13.7	0.964352	0.98986	0.968279	0.995299	0.974439	0.933743	0.970995	0.00893994
13.7333	1.00946			1.0585	0.93915	0.989226	1.01041	1.00135	0.0192744		13.7333	1.02458	1.00341	1.0196	0.990362		0.993765	1.00304	1.00579	0.00559664		13.7333	1.00035	1.00665	1.01146	1.02254	0.965712	1.00134	0.00961865		13.7333	0.994573	0.992983	1.00563	0.961434	1.01942	0.983091	0.992855	0.00807177		13.7333	0.985593	0.990451	0.981103	0.973799	0.982652	0.974321	0.98132	0.00263953
13.7667	1.01279			1.05002	1.00523	0.997241	1.00877	1.01481	0.00916786		13.7667	0.993609	1.00586	1.02072	0.991493		1.00409	0.998595	1.00239	0.00432518		13.7667	1.01303	0.971137	1.01808	1.01495	0.96742	0.996923	0.0113296		13.7667	0.988343	0.983854		0.949548	1.02047	0.983077	0.985058	0.0112498		13.7667	0.983306	0.994983	0.989898	0.997564	0.986786	0.970831	0.987228	0.00390962
13.8	1.01281				1.00894	0.982289	1.00664	1.00267	0.00691252		13.8		0.998182	1.01412	0.979834		0.996657	0.996222	0.997003	0.00543079		13.8	1.01014	1.01885	1.01223	1.02318	0.970043	1.00689	0.00950028		13.8	0.983521	0.985928	1.01573	0.95641	1.01683	0.983398	0.990303	0.00933044		13.8	0.981681	0.995429	0.978165	0.996896	0.976398	0.957309	0.98098	0.00592122
13.8333	1.00627			1.06412	1.00447	1.00156	1.00432	1.01615	0.0120164		13.8333	1.00629	0.999178	1.01703	0.970104		0.994692	1.0008	0.998016	0.00640114		13.8333	1.01206	1.01031	1.00699	1.0117	0.969443	1.0021	0.0082131		13.8333	0.998034	0.969815	1.01257	0.962324	1.01236	0.982339	0.989574	0.00876568		13.8333	0.983897	0.998785	0.972922	0.995787	0.985502	0.958336	0.982538	0.0061328
13.8667	1.01575			1.06053	0.99823	0.998398	1.00405	1.01539	0.0117246		13.8667		1.00211	1.01957	0.970766		1.0011	0.999078	0.998523	0.00785195		13.8667	1.01723	1.01303	1.01389	1.01594	0.975844	1.00719	0.00787041		13.8667	0.990026	0.975395	1.00686	0.955594	1.01276	0.976437	0.986179	0.00874818		13.8667	0.988965	0.998447	0.980197	0.974997	0.986529	0.958182	0.98122	0.00564348
13.9	1.0043			1.06046	0.952402	1.00503	1.007	1.00584	0.0170921		13.9		1.01259	1.00778	0.975985		0.996642	1.00886	1.00037	0.00665144		13.9	1.00318	1.01955	1.0149	1.03269	0.973231	1.00871	0.0100507		13.9	0.994338	0.970751	1.00646	0.956579	1.01353	0.980441	0.987017	0.00888622		13.9	0.994065	0.998551	0.97882	0.998027	0.993644	0.960101	0.987201	0.00616251
13.9333	0.9949			1.05659	1.00103	1.00726	1.00246	1.01245	0.01121		13.9333	0.998925	1.0087	1.01645	0.979262		0.998629	1.00244	1.00073	0.00510637		13.9333	1.01867	1.01572	1.01118	1.0238	0.972758	1.00843	0.00914992		13.9333	0.996317	0.981617	1.00272	0.955118	1.01408	0.986627	0.989413	0.0083224		13.9333	0.983654	1.00035	0.981553	0.993689	0.989924	0.957795	0.984494	0.00602137
13.9667	0.993341			1.06409	1.00596	1.00354	0.996845	1.01275	0.0130309		13.9667	1.00283	1.02016	1.01986	0.984777		1.0049	0.994585	1.00452	0.00569024		13.9667	1.01664	1.01845	1.00776	1.02243	0.990056	1.01107	0.00577523		13.9667	0.985544	1.00016	1.00966	0.947739	1.01947	0.984723	0.991216	0.0103005		13.9667	0.984155	0.999089	0.986865	0.990213	0.994835	0.937517	0.982112	0.00918541
14	0.983622			1.05944	0.918987	1.00555	0.982525	0.990023	0.0225859		14	1.00372	1.02099	1.02209	0.981195		0.995088	0.983549	1.0011	0.0072645		14	1.01643	1.0157	1.00751	1.01911	0.975857	1.00692	0.00800503		14	1.007	1.00699	0.994834	0.955405	1.02549	0.978909	0.994771	0.0100725		14	0.993437	1.00193	0.984095	0.992956	0.992888	0.934361	0.983278	0.0100509
14.0333	0.99931			1.06642	0.991622	1.01037	0.989916	1.01153	0.0141893		14.0333	1.0062	1.01655	1.01755	0.978807		0.994908	0.975173	0.998198	0.00751072		14.0333	1.01919	1.01984	1.00384	1.01642	0.983676	1.00859	0.00686856		14.0333	1.00782	1.00154	1.01336	0.94966	1.01424	0.975088	0.993617	0.0105752		14.0333	0.988467	0.987787	0.979626	0.994898	1.00049	0.961183	0.985408	0.00563539
14.0667	0.979502			1.05877	0.990439	0.989619	0.981201	0.999907	0.0148781		14.0667	1.00992	1.01846	1.01806	0.995503	0.960393		0.985277	0.997935	0.00921125		14.0667	1.01426	1.01838	0.987657	1.01786	0.985692	1.00477	0.00742781		14.0667	1.0025	1.00491	1.00957	0.954438	1.01092	0.98632	0.994777	0.00883294		14.0667	0.984501	0.99147	0.972969	0.984624	0.992073	0.96239	0.981338	0.00471789
14.1	0.994207			1.05335	1.00062	1.00388	0.977079	1.00583	0.0127498		14.1	1.00973	1.02152	1.02209	1.00341	0.962588	1.00728	0.986947	1.00194	0.00794904		14.1	1.01602	1.02355	0.996103	1.01441	0.995377	1.00909	0.00566657		14.1	0.995564	1.00286	0.996099	0.959938	1.02095	0.983953	0.993227	0.0083048		14.1	1.0009	0.992727	0.978336	0.982686	1.00546	0.965859	0.987661	0.00606824
14.1333	0.9913			1.05619	1.00976	0.988891	0.975697	1.00437	0.0140479		14.1333	1.00403	1.01773	1.01687	1.01853	0.967396	1.01113	0.993411	1.00415	0.00701634		14.1333	0.998505	1.0251	0.982269	1.0158	0.99889	1.00411	0.00745979		14.1333	1.00146	1.00697	1.00574	0.957067	1.01958	0.983033	0.995642	0.00910006		14.1333	0.996618	0.991881	0.977418	0.991845	0.997911	0.962373	0.986341	0.00564075
14.1667	0.990333			1.05281	1.00439	0.997977	0.980734	1.00525	0.0125286		14.1667	1.00813	1.02004	1.01943	1.01543	0.960324		0.993402	1.00279	0.00940638		14.1667	1.01137	1.01683	0.993787	1.00994	1.00235	1.00686	0.00400241		14.1667	0.994296	0.985317	1.00288	0.959406	1.01891	0.974907	0.989285	0.00856851		14.1667	0.991308	0.993562	0.970217	0.993449	1.00785	0.96041	0.986132	0.00712263
14.2	0.989208			1.06522	0.989861	0.989937	0.97654	1.00215	0.0159716		14.2	1.00995	1.03111	1.01918	1.01824	0.973902	1.00907	0.992519	1.00771	0.00718857		14.2	0.996493	1.00867	0.982516	1.01692	1.01035	1.00299	0.00609027		14.2	1.00375	0.986099	1.00749	0.958935	1.01624	0.97869	0.991868	0.0087007		14.2	0.998682	0.990733	0.980057	0.985346	1.00489	0.928011	0.981286	0.0112621
14.2333	0.992974			1.05992	0.98915	0.968208	0.982803	0.998611	0.0158974		14.2333	1.01465	1.01984	1.02381	1.02383	0.976328		0.993357	1.00864	0.00795814		14.2333	1.00722	1.02547	0.988821	1.00596	1.0066	1.00681	0.00579943		14.2333	0.998031	0.996079	1.01201	0.960277	1.01714	0.983004	0.994424	0.00844109		14.2333	1.00313	0.985895	0.971773	0.987297	1.00503	0.966311	0.986572	0.00644281
14.2667	0.978947			1.05708	0.999779	0.991057	0.98627	1.00263	0.014027		14.2667	1.02024	1.02355	1.01788	1.00618	0.96305	1.01723	0.984292	1.00463	0.00856508		14.2667	1.01311	1.02053	0.977476	1.01434	1.00648	1.00639	0.00756423		14.2667	0.999977	1.00326	0.991512	0.961574	1.01579	0.977739	0.991641	0.00792641		14.2667	0.991683	0.990844	0.969929	0.977499	1.00307	0.965725	0.983124	0.00588507
14.3	0.98233			1.05197	0.996842	0.968875	1.00292	1.00059	0.0141393		14.3	1.02601	1.02419	1.0243	0.99644	0.943851	1.00691	0.985524	1.00103	0.0111991		14.3	1.00626	1.0182	0.967281	1.0135	1.01035	1.00312	0.00916974		14.3	0.999992	1.00813	1.00777	0.961228	1.0214	0.988949	0.99791	0.00853118		14.3	0.993108	0.98946	0.985093	0.987402	1.00662	0.961871	0.987259	0.00595327
14.3333	0.994719			1.04863	0.999906	0.961944	1.00448	1.00194	0.0138607		14.3333	1.01346	1.0207	1.03305	0.992672	0.958937	1.02139	0.998163	1.00548	0.00937649		14.3333	0.998382	1.01179	0.974504	1.0026	1.00891	0.999235	0.00661369		14.3333	1.00271	1.00386	0.998895	0.960376	1.02288	0.98594	0.995777	0.00857882		14.3333	0.993288	0.992008	0.978003	0.982113	1.00028	0.974694	0.986731	0.00406911
14.3667	0.994426			1.05031	0.979848	0.989531	1.00393	1.00361	0.0123058		14.3667	1.01382	1.01656	1.02973	0.970507	0.9619		0.997707	0.998372	0.0110453		14.3667	1.00698	1.01407	0.964375	1.00071	1.00591	0.998409	0.00877107		14.3667	1.00674	1.0041	1.01747	0.969736	1.01882	0.992769	1.0016	0.00747025		14.3667	0.990317	0.993007	0.976728	0.992266	1.0023	0.934831	0.981574	0.00993195
14.4	0.984794			1.04902	1.00186	0.979425	1.0055	1.00412	0.0122611		14.4	1.00729	1.01804	1.02406	0.987515	0.963258	1.01345	1.00296	1.00237	0.00788831		14.4	1.01236	1.01459	0.974088	1.01575	1.00714	1.00479	0.00781539		14.4	0.997294	1.00388	1.00145	0.975337	1.00725	0.984999	0.995034	0.00504092		14.4	0.970703	0.996262	0.995188	0.995699	1.00363	0.968942	0.988403	0.00601328
14.4333	0.968221			1.05238	0.986036	0.990816	1.003	1.00009	0.0142163		14.4333	1.02369	1.01553	1.0293	0.993976	0.992143	1.00776	1.01103	1.01049	0.00527895		14.4333	1.01159	1.00468	0.988468	1.00806	1.00818	1.0042	0.00408121		14.4333	0.987322	1.00504	1.00825	0.98056	1.02356	0.993155	0.999648	0.00641156		14.4333	0.989702	0.994972	0.987752	0.995441	1.00188	0.954268	0.987335	0.00691557
14.4667	0.985795			1.05308	0.987214	0.971907	1.00666	1.00093	0.0141638		14.4667	1.01803	1.01951	1.03529	0.993892	0.990583	0.999991	1.00282	1.00859	0.00611133		14.4667	1.01683	1.00937	0.992781	1.00354	1.01281	1.00707	0.0041838		14.4667	0.997939	1.00828	1.01216	0.977665	1.0123	0.992593	1.00016	0.00555429		14.4667	1.00103	0.985767	0.982582	0.990276	1.00629	0.966279	0.988704	0.00580994
14.5	0.987952			1.04434	0.997641	0.984863	1.00028	1.00302	0.0107246		14.5	1.00225	1.01277	1.02173	0.995361	0.971662	1.01909	1.00017	1.00329	0.00646135		14.5	1.00979	0.997462	0.99438	1.00935	1.0117	1.00454	0.0035732		14.5	0.998214	1.00345		0.980649	1.00536	0.990142	0.995562	0.00456587		14.5	0.993991	0.988438	0.986348	0.996145	1.00558	0.95503	0.987589	0.00707146
14.5333	0.985693			1.04855	1.00983	0.995111	0.996841	1.00721	0.0110298		14.5333	1.00625	1.01488	1.03028	0.995228	0.973173	1.0072	1.01058	1.00537	0.00669395		14.5333	1.01214	1.01612	0.991851	1.0181	1.01103	1.00985	0.00467962		14.5333	1.0084		1.02037	0.98128	1.01207	0.988561	1.00214	0.00738166		14.5333	0.975997	0.987597	0.996281	0.98231	1.01037	0.962583	0.985856	0.0067428
14.5667	0.978958			1.0478	1.00609	0.9864	0.99504	1.00286	0.0121101		14.5667	0.996541	1.01231	1.02473	0.997594	0.970624	1.00479	1.00873	1.00219	0.00637931		14.5667	1.01433	1.01017	1.00837	1.00934	1.01359	1.01116	0.00118441		14.5667	1.0107		1.01882	0.988426	0.998109	0.993771	1.00197	0.00559424		14.5667	0.992086	0.987222	0.985137	0.99568	1.00608	0.95253	0.986456	0.00742788
14.6	0.994906			1.053	0.920893	0.995302	0.987171	0.990254	0.0209813		14.6	1.007	1.01393	1.03025	1.0023	0.972287	0.984644	1.0105	1.00299	0.00726213		14.6	1.00231	0.999151	0.996896	1.0147	1.01806	1.00622	0.0042672		14.6	1.00615		0.99768	0.985366	1.01354	0.976203	0.995789	0.00677636		14.6	0.990087	0.984174	0.979715	0.983163	1.00703	0.962939	0.984518	0.00585477
14.6333	0.984971			1.05231	0.998819	0.990603	0.98486	1.00231	0.0127555		14.6333	1.01037	1.01098	1.03206	0.998328	0.985045	0.997642	1.00989	1.00633	0.00557451		14.6333	1.01122	1.00537	0.985147	1.00937	1.01184	1.00459	0.00498984		14.6333	1.01531		1.01278	0.9862	1.0141	0.980515	1.00178	0.00758498		14.6333	0.995167	0.994395	0.988274	0.989238	1.01203	0.953881	0.988831	0.00781304
14.6667	0.984967			1.05877	0.940458	0.991085	0.981103	0.991276	0.01908		14.6667	1.012	1.01737	1.03165	1.01309	0.960707	0.996013	1.00745	1.00547	0.00848617		14.6667	1.00287	1.00868	0.981664	1.01238	1.01428	1.00397	0.00590715		14.6667	1.00337		1.01798	0.984944	1.00187	0.97691	0.997014	0.00725699		14.6667	0.997866	0.999488	0.966987	0.988448	1.02388	0.955218	0.988649	0.0100512
14.7	0.993739			1.06547	0.996833	0.990445	0.983651	1.00603	0.0150206		14.7	1.02269	1.01514	1.03437	1.01842	0.987737	0.988968	1.00872	1.01086	0.00652238		14.7	0.998869	1.01909	0.980801	1.01667	1.01205	1.0055	0.0070942		14.7	1.00095		1.01835	0.98946	1.01841	0.984488	1.00233	0.00707407		14.7	1.00521	0.994846	0.978057	0.995766	1.00312	0.972445	0.991574	0.00546574
14.7333	0.990654			1.07071	0.991084		0.975053	1.00687	0.0216014		14.7333	1.02085	1.01194	1.03482	1.01026	0.985325	1.00098	0.998353	1.00893	0.00608536		14.7333	1.01048	1.01573	0.961067	1.00694	1.01566	1.00198	0.0103611		14.7333	1.00875		1.02025	0.999292	1.01758	0.979952	1.00516	0.00729592		14.7333	1.00387	0.994485	0.960213	0.999489	1.01786	0.974461	0.99173	0.00854325
14.7667	0.982243			1.06383	0.988185		0.965041	0.999824	0.0218918		14.7667	1.01569	1.02441	1.02701	1.01205	0.994625	1.00426	1.00705	1.01216	0.00430713		14.7667	1.01419	1.01456	0.971418	1.0202	1.01442	1.00696	0.00895569		14.7667	1.00184		1.02171	0.994924	1.0102	0.988599	1.00346	0.00580902		14.7667	0.998535	0.991781	0.972248	0.977538	1.01751	0.967816	0.987571	0.00765931
14.8	0.982975			1.05261	1.00065	0.997919	0.966759	1.00018	0.0144346		14.8	1.01614	1.01929	1.03233	1.01181	0.999106	0.997622	1.00933	1.01223	0.00453408		14.8	1.003	1.01516	0.990199	1.01584	1.01537	1.00791	0.00504411		14.8	1.00698		1.02046	0.992966	1.01533	0.989506	1.00505	0.00606007		14.8	0.981126	0.988374	0.975925	0.994967	1.00697	0.950004	0.982894	0.00793482
14.8333	0.979211			1.06479	0.993193	0.986097	0.967833	0.998225	0.017159		14.8333	1.01689	1.01695	1.0342	1.00191	0.985217	1.0034	1.00057	1.00845	0.00592969		14.8333	1.00595	1.01325	0.978229	1.01202	1.01429	1.00475	0.00678555		14.8333	1.00947		1.0239	0.996509	1.0066	0.991462	1.00559	0.00562819		14.8333	0.992884	1.00357	0.981703	0.990068	1.01658	0.95368	0.989746	0.00872972
14.8667	0.986629			1.05884	0.996082	0.991173	0.97117	1.00078	0.0151036		14.8667	1.02263	1.01591	1.02981	0.994804	0.992642	1.01444	1.00978	1.01143	0.00517485		14.8667	1.0126	1.00697	0.992324	1.0178	1.01733	1.0094	0.00469642		14.8667	1.0077		1.02547	1.00212	1.02066	0.988059	1.0088	0.00668804		14.8667	0.981799	0.99908	0.966988	0.991061	1.00995	0.981865	0.988457	0.00613807
14.9	0.991944			1.06281	0.998726	0.969707	0.977145	1.00007	0.0165094		14.9	1.02218	1.02086	1.03955	1.01242	0.986957	1.01739	1.01412	1.01621	0.00593182		14.9	1.01779	1.00102	0.989126	1.02238	1.01783	1.00963	0.00628841		14.9	1.00935	1.00009	1.01425	0.989249	1.0136	0.981466	1.00133	0.0055492		14.9	0.995621	0.986412	0.981983	0.993362	1.01436	0.966536	0.989713	0.00649026
14.9333	0.997412			1.06766	1.00496	0.979452	0.973673	1.00463	0.0167583		14.9333	0.998411	1.02148	1.02485	1.00594	0.987798	1.00972	1.00252	1.00725	0.00487726		14.9333	1.01155	1.0131	0.989116	1.01735	1.01489	1.0092	0.00511314		14.9333	1.00298	0.997863	1.01836	0.994586	1.01409	0.982823	1.00178	0.00533584		14.9333	0.984867	0.99206	0.964213	0.992674	1.02316	0.977088	0.98901	0.00808905
14.9667	0.979093			1.06323	0.923719	0.986775	0.978685	0.986301	0.0222996		14.9667	1.0178	1.01929	1.02294	1.00605	0.991858	1.00724	1.00489	1.01001	0.00406156		14.9667	1.0207	1.00873	0.992147		1.01747	1.00976	0.00639216		14.9667	1.01059	0.99518		0.99418	1.01496	0.980928	0.999168	0.00613762		14.9667	0.989314	0.985738	0.972651	0.990207	1.01238	0.92184	0.978689	0.0125151
15	0.984899			1.05983	1.00504	0.95355	0.959265	0.992517	0.0191957		15	1.00406	1.0208	1.02422	0.996666	1.00294	1.004	0.99917	1.00741	0.00404745		15	1.03444	1.01447	0.985835		1.01338	1.01203	0.00998436		15	1.0088	0.986699	1.01803	0.989305	1.01758	0.977396	0.999635	0.0071014		15	0.988901	0.991154	0.961617	0.992368	1.00931	0.942577	0.980989	0.00991379

## Sheet: ED Figure 4E
Time(s)	1	2	3	4	5	6	7	8	9	10	Mean	SEM
0.033333	0.991359		0.986816		1.00213	0.99356	0.998386	0.994897	0.999732	0.992602	0.994936	0.00175643
0.066667	0.990206		0.987484	1.00267	0.996208	1.00462	1.00132	0.994622	1.00161	0.995689	0.997158	0.00195255
0.1	0.983051		0.987024	1.02063	1.00127	0.994303	1.00496	0.993893	1.00619	1.00379	0.999456	0.00377723
0.133333	0.980803		0.99664	1.01477	1.00513	0.992769	0.992331	0.98539	1.0039	0.995857	0.996399	0.0034652
0.166667	0.991629		0.996619	0.99923	1.00101	0.991043	1.00509	1.00815	1.00097	1.00291	0.999628	0.00191431
0.2	0.994863		0.989058		1.00583	0.998106	0.998933	1.00091	1.02015	1.0028	1.00133	0.00323308
0.233333	0.990308		0.98991	1.00392	1.00466	0.99248	0.997809	0.991651	1.00027	1.00431	0.997257	0.00209115
0.266667	0.986359		0.994755	0.996296	1.00034	0.98586	1.00439	1.01185	1.00399	1.003	0.998539	0.00286946
0.3	0.999513		0.987405	1.005	1.00439	0.99605	0.99575	0.990056	1.01602	1.0033	0.999721	0.00289274
0.333333	0.995929		0.996159	0.99338	0.991805	0.989562	0.999871	1.00438	1.00665	0.994425	0.996907	0.00189891
0.366667	1.0076		0.994232	1.00479	0.998369	0.988428	0.999777	0.998947	1.01598	0.994713	1.00032	0.00272363
0.4	1.00038		0.993639	1.00872	0.995057	0.999134	1.00138	1.01244	0.999889	1.00503	1.00174	0.0020295
0.433333	0.993271		0.984671	1.01203	0.993459	0.996679	0.994919	0.994735	1.00726	0.997557	0.997175	0.00268486
0.466667	0.993042		0.98296	1.00091	0.995393	0.996139	1.00341	1.00206	1.00564	0.99322	0.996974	0.00231845
0.5	0.993814		0.994626		0.992097	0.995488	0.996966	0.98536	0.998002	1.00427	0.995079	0.00189924
0.533333	0.998563		0.992439		0.992678	1.00233	0.999427	1.01291	1.00459	0.995429	0.999796	0.00241635
0.566667	1.00584		0.981231		0.989193	1.00138	0.993311	0.99698	1.0053	0.993123	0.995794	0.00296649
0.6		0.994657	0.975798		0.99231	1.00187	1.00317	0.990478	1.00633	0.998937	0.995444	0.00341408
0.633333	0.994274	0.982487	0.972908		0.987603	0.994183	1.00479	0.995408	1.00867	0.9886	0.992102	0.00362988
0.666667	0.98541	0.990498	0.99322		0.981747	0.999913	1.01027	0.998285	1.00468	0.995689	0.995524	0.00300673
0.7	0.993701	0.996111	0.99103		0.960766	1.00424	1.00064	1.00333	1.00257	0.996802	0.994356	0.00446315
0.733333	0.992508	1.00433	0.997587			1.00518	0.99863	0.994658	1.0123	0.991603	0.9996	0.00253038
0.766667	0.992696	0.992267	0.997985			0.992287	1.00322	0.989909	1.00715	0.999158	0.996835	0.00215744
0.8	0.992656	1.00501	1.00259	1.00848		1.00695	0.999974	0.999		0.992744	1.00093	0.00212466
0.833333	1.00605		1.00118		0.990544	1.0004	0.999616	0.976337	1.0085	0.98245	0.995635	0.00404323
0.866667	1.00049	0.986745	0.997381		0.992115	1.00368	1.00565	0.996518	0.999388	0.988464	0.996714	0.00216908
0.9	0.998331		0.998163	0.989715	0.986202	0.994989	0.993768	1.00317	1.00286	0.990286	0.995276	0.00196519
0.933333	0.996498		1.0072	1.00482	0.981521	1.00219	1.00515	1.00238	1.01004	1.00225	1.00134	0.00277782
0.966667	1.00474	0.985342	0.999601	0.977252	0.965165	0.996796	0.999471	1.00475	1.00422	1.00051	0.993786	0.00426041
1	0.998356	1.00312	1.01234	0.994335	0.973882	0.992647	0.999711	0.983383	1.00858	0.997128	0.996349	0.00358684
1.03333	1.00899	1.01784	1.00472	0.994533	0.986578	0.99429	1.00838	0.995016	1.00207	1.00509	1.00175	0.0029032
1.06667	1.01737	1.0227	1.01016	0.999454	0.988812	1.00328	0.995978	0.99917		0.996025	1.00366	0.0036677
1.1	1.0021	1.0189	1.00862		0.987541	0.995924	0.997841	1.00094	0.988396	1.00657	1.00076	0.00330387
1.13333	0.99838		1.00841	0.993149	0.986682	0.990354	1.00095	1.00934	0.997297	1.00679	0.999039	0.00269742
1.16667	1.00232		0.999801	1.00448	0.980984	0.995091	0.993956	1.00018	0.985949	1.00534	0.996456	0.0027904
1.2	0.987346		1.00962		0.990808	0.998028	0.99993	1.0134		0.999904	0.999862	0.00352003
1.23333	1.00353		1.00583		0.993167	1.00268	0.994975	1.00975	0.9849	0.999548	0.999297	0.00281848
1.26667	1.00985		1.01126		0.996996	1.00251	1.00146	1.01407		1.00448	1.0058	0.0023071
1.3	1.00997		1.00883	1.00229	1.00052	1.0056	1.00043	1.0142	0.990326	0.994298	1.00294	0.00253934
1.33333	1.02008		1.01599	1.01424	0.982825	0.997052	1.0064	1.00944	0.994846	0.997876	1.00431	0.00401378
1.36667	1.01565		1.01582	0.993092	0.995935	1.0019	0.99668	1.01851	0.991593	1.0093	1.00427	0.0035535
1.4	1.00598		1.01002		1.00603	1.00338	0.997873	1.01686	0.982342	1.0058	1.00354	0.00358112
1.43333	1.01186		1.0122		1.00826	1.00829	0.997381	0.98207	0.992023	0.990968	1.00038	0.00400601
1.46667	1.0011		1.00425		0.996051	1.00374	0.996063	0.947954		1.00693	0.993727	0.0077854
1.5	1.00272		1.01163		1.01945	1.00463	0.997139	1.01337	1.00068	1.00107	1.00634	0.0027047
1.53333	0.999045		1.00897	0.991408	1.02245	1.01663	0.99553	1.01112	1.00153	1.00137	1.00534	0.003389
1.56667	1.01428		0.99755		1.01367	1.00411	0.995841	1.00832	1.00296	0.990638	1.00342	0.00299763
1.6	0.998264		1.00602		1.02234	1.00455	0.994375	1.01299	0.995065	0.990485	1.00301	0.00378398
1.63333	0.996843		1.00806	1.00116	1.02213	1.01128	0.998541	1.00315	1.00049	1.00104	1.00474	0.00264641
1.66667	0.999438		1.01569	1.02377	1.02342	1.00682	1.00229	1.00002		1.01263	1.01051	0.00350431
1.7	0.991924		1.01651	0.997998	1.01889	1.00528	1.00427	0.999582	1.00239	1.00854	1.00504	0.00287398
1.73333	0.991543		1.02273		1.01773	1.00607	1.00166	1.00334	0.994919	1.01052	1.00606	0.0037691
1.76667	0.989623		1.01422		1.00508	1.00424	0.99994	1.012	0.993114	1.01836	1.00457	0.00357274
1.8	1.00498		1.01235	0.999405	1.01538	1.01072	1.00442	0.99788	0.993469	1.00782	1.00516	0.00240782
1.83333	1.00742		1.0112		1.02251	0.995074	0.993547	1.00672	0.997893	1.00802	1.0053	0.00338688
1.86667	1.00809		0.976365		1.02406	1.00349	1.00133	0.993358	0.986971	1.01422	1.00099	0.00538764
1.9	1.01833		1.009	0.998258	1.01784	1.00765	1.00291	1.00035	0.986694	1.00729	1.00537	0.00328357
1.93333	1.01526		1.00463	0.980292	1.0131	1.01041	1.00238	0.986467	0.988878	1.00245	1.00043	0.00414951
1.96667	1.01021		0.970809	0.992663	1.02521	0.99827	1.00309	1.00147	0.989201	0.992824	0.998193	0.00499839
2	1.00525		1.00608	0.976862	1.03467	0.99538	1.00233	1.00213	0.984554	0.997139	1.00049	0.00537203
2.03333	1.00731				1.02134	0.991789	1.00119	0.988553	0.98382	0.993949	0.998278	0.0048459
2.06667	1.01142	0.961271	1.00116	1.01273	1.02207	0.993767	0.997973	1.00215	0.989034	1.00185	0.999343	0.00521535
2.1	1.01992		0.99554	1.00748	1.01952	0.993763	0.998261	1.00931	0.976911	1.0075	1.00313	0.00453853
2.13333	1.02012	0.937478	0.991293	0.987861	1.01727	0.998959	1.00586	0.99929		0.998645	0.995197	0.00804941
2.16667	1.00886	0.958182	0.984184	0.990083	1.01899	0.999148	0.995717	1.00679	0.96806	1.00289	0.99329	0.005944
2.2	1.01634	0.939347		0.996455	1.0148	0.993759	0.996438	1.01356	0.985991	0.987273	0.993774	0.00783712
2.23333	0.995824		0.976049	0.993956	1.01521	0.992565	0.999493	1.02256	0.981287	0.986066	0.995889	0.00502145
2.26667	1.0057	0.945231	0.970154	0.98801	1.02315	0.995745	1.00228	1.00475	0.98029	0.991888	0.990719	0.00686503
2.3	1.01031	0.939868	0.974272	0.988915	1.01712	0.992514	0.994628	0.985955	0.973657	0.988769	0.9866	0.00675502
2.33333	1.00682				1.02426	0.987428	0.996006	0.979027	0.968784	0.996359	0.994097	0.00688792
2.36667	1.0187			0.982717	1.02684	0.977969	0.992924	0.982613	0.967941	0.991559	0.992659	0.00716477
2.4	1.01057	0.951893		0.963678	1.02544	0.97711	0.993493	0.993286	0.971949	0.99648	0.9871	0.00773272
2.43333	1.00909			0.935216	1.02619	0.974867	0.994149	0.983045	0.977143	0.998888	0.987323	0.00959627
2.46667	1.01322				1.02429	0.964466	0.997734	0.971716	0.990004	1.00366	0.995013	0.00812383
2.5	1.01053				1.01805	0.98328	0.996096	0.971135	0.970657		0.991624	0.00817462
2.53333	1.01157			0.986986	1.02378	0.977249	1.00105		0.976382	1.01004	0.99815	0.00693843
2.56667	1.01916			0.95154	1.03065	0.988721	0.997854	0.962256	0.97628	1.0042	0.991333	0.00962787
2.6	1.01399			0.991636	1.02267	0.975073	0.99038	0.972096	0.973296	1.01777	0.994614	0.00740288
2.63333	1.02869			0.960727	1.02476	0.986598	0.996913	0.986181	0.97401	1.0192	0.997135	0.00880072
2.66667	1.01659			0.981184	1.02845	0.988948	1.003	0.980096	0.963879	1.00754	0.996211	0.00757415
2.7	1.01999		0.981493	0.986021	1.02518	0.996765	1.0016	0.975702	0.984541	1.01008	0.99793	0.00586538
2.73333	1.01433		0.993223	0.984644	1.021	0.994974	1.00983	0.985309	0.984207	0.999216	0.998525	0.00455849
2.76667	1.02352		0.978262	0.968862	1.02541	0.990422	1.00017	0.989404	0.980988	1.00655	0.995956	0.00656436
2.8	1.02454		0.97864	0.953447	1.0205	0.989758	0.990737	0.983128	0.973514	1.00524	0.991056	0.00757396
2.83333	1.02122		0.977067	0.988177	1.02677	0.99734	0.997944	0.983822	0.990747	1.00719	0.998919	0.00556817
2.86667	1.00082		0.967997		1.03388	0.996326	0.995194	0.989974	0.994004	1.00136	0.997445	0.00640229
2.9	1.01426		0.967586	0.977379	1.0229	0.995628	1.00021	0.983573	0.98635		0.993485	0.00658184
2.93333	1.01237				1.01947	0.998965	0.991539	0.974923	0.995862	1.00429	0.999631	0.00549459
2.96667	1.01644			0.957505	1.02746	1.00053	1.00354	0.951299	0.983735	1.00418	0.993085	0.00955628
3	1.01305				1.02586	0.993213	1.00217		0.990779	1.00507	1.00502	0.00532016
3.03333	1.00982		0.992966		1.02599	0.997156	0.996029	0.960061	0.981963	1.00004	0.995503	0.00681907
3.06667	1.02271		0.99524	0.973406	1.01755	0.981429	0.993761	0.993075	0.994982	1.00127	0.997047	0.00518241
3.1	1.01485	0.99599	0.98471	0.970199	1.03258		0.989085	1.00162	0.983314	1.00045	0.996977	0.00616694
3.13333	1.01523	0.986421	0.998178		1.02498	0.958853	0.991629	1.00306	0.990251	0.996835	0.99616	0.0062237
3.16667	1.01007	0.988499	0.99882	0.970068	1.02783	0.974966	0.988279	0.999886	0.990234	1.00873	0.995738	0.00543592
3.2	1.02161	0.986085	1.00439	0.972837	1.00838	0.986998	0.999971	0.999823	0.988122	1.0047	0.997291	0.00440526
3.23333	1.01343	0.987448	0.999849	0.95621	1.01351	0.993006	0.995873	1.00264	0.98019	1.00487	0.994703	0.0054228
3.26667	1.00128	0.978932	0.991535	0.952673	1.00812	0.998009	0.998376	0.978044	0.982705	1.00563	0.98953	0.0053188
3.3	1.00539	0.976975	1.00421	0.982269	1.00596	0.997391	0.993617	0.991481	0.977563	1.00238	0.993724	0.00359334
3.33333	0.994999	0.97886	0.989211	0.980308	1.00075	0.998013	0.995617	0.987078	0.987393	1.00934	0.992157	0.00297774
3.36667	0.99795	0.982335	1.00484	0.978441	1.01203	0.994443	1.00075	1.00148	0.985623	1.00463	0.996253	0.00344913
3.4	1.00952	0.982926	1.0018	0.98544	1.0097	0.999623	0.993885	0.97503	0.980495	1.00101	0.993943	0.00389742
3.43333	1.01667	0.982463	1.01243	0.985694	1.0299	0.999462	0.98997	0.971405	0.983284		0.996809	0.00639577
3.46667	1.02866	0.9827	1.00857	0.977049	1.02851	0.994375	0.993019	0.956205	0.984985	1.01277	0.996685	0.00731117
3.5	1.02814	0.978392	1.00186	0.977688	1.02137	1.01158	0.989822	0.970235	0.991648	0.997851	0.996859	0.00606998
3.53333	1.02509	0.990927	1.00945	0.979865	1.01546	1.00102	0.992005	0.992188	0.984234	1.00718	0.999742	0.00455938
3.56667	1.02754	0.998184	1.00718		1.01869	1.00793	0.999539	0.983944	0.99463	1.00772	1.00504	0.00431899
3.6	1.0149	0.996232	1.00335	0.982878	1.00892	1.00064	1.00783	1.00091	0.996306	1.00369	1.00156	0.0027595
3.63333	1.01914	0.996395	1.00231	0.981069	1.0197	1.00302	0.997919	0.994667	0.992329	0.999217	1.00058	0.00369561
3.66667	1.02397	0.998894	1.00575		1.01551	0.995081	0.987969	0.995841	0.983798	1.00947	1.00181	0.00434352
3.7	1.01775	0.992365		0.974848	1.01191	1.01073	0.998981	0.99494	1.00255	1.00474	1.00098	0.00426521
3.73333	1.02041	1.02108	0.995117		1.02689	0.998579	1.00201	0.981742	0.98875	1.00569	1.00448	0.00517268
3.76667	1.01909	1.0161	0.979137	0.986538	1.02598	1.00012	0.987212	0.990886	0.993212	1.00269	1.0001	0.00496128
3.8	1.02101		0.973373	0.976915	1.01333	0.997762	0.99435	0.994241	0.997747	0.999796	0.996503	0.00503658
3.83333	1.01154		0.995019		1.02026	0.998724	0.980916	0.989412	1.00428	0.999894	1.00001	0.00436026
3.86667	1.0257		0.996966		1.01465	0.999339	0.98785	0.983579	0.996733	1.00187	1.00084	0.00483808
3.9	1.02823		1.00266		1.00368	1.00185	0.980646	0.998426	0.993895	1.00089	1.00129	0.00467347
3.93333	1.03163		1.00269		0.989931	1.0093	0.985171	0.977095	0.997394	1.00589	0.999888	0.0059485
3.96667	1.02229		1.01088	0.98195	1.00652	1.00988	0.987592	0.994249	0.990475	1.01625	1.00223	0.00468193
4	1.0282		1.01094		0.999271	0.988105	0.985138	0.980824	0.987236	1.01064	0.998794	0.00584023
4.03333	1.03335		1.00581	0.995582	0.996475	1.00017	0.99183	0.994435	0.973685	1.01103	1.00026	0.00538657
4.06667	1.02793		1.00516	0.995939	1.01402	0.993661	0.992004	0.978983	0.984826	1.01229	1.00054	0.00519691
4.1	1.02589		1.00769	0.980852	1.00898	0.981926	0.980653	0.990667	0.991212	1.01088	0.997639	0.00541361
4.13333	1.03222		1.00143	1.00933	0.995709	0.987745	0.981869	0.986714	0.982027	1.009	0.998449	0.00550647
4.16667	1.02972		1.00445	0.994177	1.00873	0.983125	0.986836	0.985276	0.994926	1.01388	1.00012	0.00514578
4.2	1.02901		1.00275	0.979619	1.00741	0.983656	0.993379	0.980906	0.983748	1.00215	0.995847	0.0054112
4.23333	1.0307		1.01415	1.00088	1.01782	0.995333	0.981156	0.98901	0.991009	0.995932	1.00178	0.00530675
4.26667	1.03069		1.00708	0.993184	1.02721	0.995552	0.990767	0.987497	0.990119	0.99595	1.00201	0.0054243
4.3	1.0452	0.978723	1.00332	1.00466	1.01573	1.00315	0.981512	0.982128	0.993262		1.00085	0.00695791
4.33333	1.03964	0.974316	0.991869	0.994625	1.01249	0.99932	0.990783	0.979355	0.995907	0.986449	0.996476	0.00584074
4.36667	1.05378	0.976586	1.00149	1.00399	1.03265	0.998445	0.990988	0.989314	0.985579	0.991467	1.00243	0.007412
4.4	1.0419	0.979429	1.00501	0.99896	1.01096	0.993937	0.990774	0.991335	0.984543	0.995587	0.999243	0.00555221
4.43333	1.03857	0.982724	0.999846	0.994117	1.02426	1.00177	0.993048	0.985702	0.986199	1.00063	1.00069	0.0056285
4.46667	1.03844	0.979982	0.995961		1.02272	0.994611	0.986859	0.988842	0.979989	0.999541	0.998549	0.00658124
4.5	1.04455	0.973899	1.00806		1.01095	0.988659	0.989302	0.983668	0.974324	1.00365	0.997451	0.00742999
4.53333	1.04249	0.978545	1.00651		1.02605	0.982392	0.981871	0.985907	0.986703	0.996237	0.998523	0.00744894
4.56667	1.03698	0.97486	1.01294	0.982592	1.0182	0.992511	0.987929	0.985248	0.985381	1.00171	0.997835	0.00613759
4.6	1.03034	0.973413	1.00582		1.01748	0.99336	0.988313	0.992331	0.984865	1.00301	0.998771	0.00581059
4.63333	1.04106	0.97441	1.00993	0.963619	1.01577	0.989963	0.978506	0.983977	0.981391	1.00584	0.994446	0.0073809
4.66667	1.03886	0.974932	1.00822	0.960079	1.00605	0.985342	0.984447	0.993014	0.981551	1.00399	0.993649	0.00690779
4.7	1.03364	0.97095	1.01279		1.01406	0.991621	0.972813	0.999621	0.987949	1.01312	0.999619	0.00693473
4.73333	1.0437	0.979573	0.992175	1.00204	1.0307	0.993391	0.97209	0.998788	0.993233	0.995708	1.00014	0.00684968
4.76667	1.04352	0.987393	1.0029	1.00409	1.02198	0.996314	0.97407	0.994907	0.995659	1.01345	1.00343	0.00610585
4.8	1.05137	0.982585	1.01034	1.00027	1.03045	1.00369	0.973987	1.00377	0.995724	1.01933	1.00715	0.00711899
4.83333	1.05541	0.983242	1.01379		1.0303	0.994281	0.98286	1.01034	0.993573	1.01834	1.00913	0.00792413
4.86667	1.04811	0.985536	1.01986	1.00437	1.03102	1.00255	0.979394	1.00452	0.999197	1.02103	1.00956	0.00656599
4.9		0.987712	1.01019	1.01451	1.03722	1.00941	0.981161	1.00107	0.992366	1.02786	1.00683	0.00613433
4.93333	1.05565	0.991812	1.01976		1.02932	1.00709	0.97397	1.00308	0.998171	1.02952	1.01204	0.00809811
4.96667		0.995287	1.02569		1.01854	1.00525	0.979517	1.0136	0.997816	1.02258	1.00728	0.0055866
5	1.06753	0.999511	1.0131	1.01593	1.04181	0.999619	0.975398	1.01312	1.00043	1.02523	1.01517	0.00806047
5.03333	1.06382	1.00341	1.03285	1.0142	1.0351	1.01325	0.984957	1.0057	0.991006	1.02325	1.01675	0.00733769
5.06667	1.06445	0.997746	1.02547	1.01477	1.03699	1.01051	0.979711	1.00471	1.00006	1.03098	1.01654	0.00757368
5.1	1.06595	1.00495	1.02257	1.01318	1.03281	1.00673	0.98157	1.01074	1.00171	1.02778	1.0168	0.00713876
5.13333	1.06168	1.00612	1.02441		1.05019	1.00242	0.983545	1.00996	0.998081	1.03175	1.01868	0.00850051
5.16667	1.07131	0.998178	1.02567		1.03082	1.01211	0.982894	0.994256	1.00982	1.02417	1.01658	0.00864051
5.2	1.07277	1.00611	1.02383	1.03097	1.03797	1.01605	0.992521	1.00815	0.988139	1.03763	1.02141	0.00792526
5.23333	1.05235	1.00366	1.02819	1.0082	1.03968	1.01262	0.985213	1.01094	0.998812	1.03114	1.01708	0.00644762
5.26667	1.07329	1.0038	1.02841		1.04851	1.00937	0.983377	1.01146	0.999125	1.02144	1.01986	0.00909093
5.3	1.07409	0.997891	1.03044		1.03815	1.01501	0.98134	1.01168	1.00202	1.03244	1.02034	0.00906688
5.33333	1.07214	1.00224	1.02597		1.04075	1.01706	0.988931	1.00879	1.00096	1.04069	1.02195	0.00862471
5.36667	1.0738	1.00818	1.02087		1.04036	1.01957	0.980831	1.01653	1.0047	1.03544	1.02225	0.00867843
5.4	1.06786	1.00961	1.02803	1.00271	1.04598	1.01431	0.974673	1.00739	0.986419	1.04229	1.01793	0.00898422
5.43333	1.07176	0.999203	1.02621	0.994778	1.04088	1.01639	0.991473	1.00057	1.0076	1.03535	1.01842	0.00802137
5.46667	1.07086	1.00917	1.03056		1.03832	1.01712	0.986844	1.00968	1.0007	1.03574	1.02211	0.00828747
5.5	1.06662	1.00542	1.02683		1.03252	1.01514	0.992702	1.01387	0.999398	1.03966	1.02135	0.0076288
5.53333	1.06636	1.01295	1.03062		1.03084	1.01597	0.98688	1.00834	1.01259	1.03614	1.0223	0.00740358
5.56667	1.07444	1.00526	1.0312	1.02918	1.05262	1.01594	0.984422	1.00367	1.00965	1.03662	1.0243	0.00830104
5.6	1.0707	1.00383	1.02333		1.04806	1.01666	0.994108	1.00352	0.998051	1.03453	1.02142	0.00854556
5.63333	1.07251	1.00619	1.01899		1.03399	1.01908	0.987497	1.00717	1.01089	1.03512	1.02127	0.00804829
5.66667	1.06817	1.00656	1.02752		1.03516	1.00576	0.9906	1.00283	1.01133	1.03808	1.02067	0.00794722
5.7	1.06023	1.01227	1.02325	1.02417	1.04627	1.00216	0.987682	0.997327	1.00872	1.03456	1.01967	0.00715818
5.73333	1.0689	1.00856	1.02153	1.02664	1.04211	0.991865	0.998478	1.00174	0.99933	1.02548	1.01846	0.0075126
5.76667	1.06136	1.00418	1.0212		1.03957	1.00484	0.988492	1.00045	1.00725	1.03905	1.01849	0.00786603
5.8	1.08357	1.00871	1.02938	1.00319	1.03621	0.999455	0.994778	1.00099	0.995153	1.03315	1.01846	0.00881137
5.83333	1.07602	0.998836	1.0194		1.03562	0.994893	0.98268	1.01914	1.01491	1.03822	1.01997	0.00928853
5.86667	1.07177	1.00828	1.01953		1.04806	1.00308	0.991614	1.00744	1.00579	1.03636	1.02133	0.00858695
5.9	1.06216	1.00458	1.00654		1.038	0.995536	0.992631	1.00421	1.00606	1.04144	1.0168	0.00806092
5.93333	1.0706	1.00451	1.00497		1.04268	1.00366	0.985228	1.0084	1.00116	1.03931	1.01783	0.00900369
5.96667	1.06865	0.996144	1.01296		1.03762	1.0004	0.991691	1.0051	1.00497	1.03864	1.01735	0.00851003
6	1.07052	1.00566	1.0214		1.03011	0.996361	0.994881	1.00985	1.00753	1.03901	1.01948	0.00805357
6.03333	1.06127	1.00814	1.01312		1.03633	1.00173	0.988647	1.00442	1.00491	1.03974	1.01759	0.00771231
6.06667	1.04929	1.00289	1.00946		1.0462	0.995394	0.987221	0.995525	0.999306	1.04085	1.01401	0.00813736
6.1	1.0706	1.00994	1.00776		1.04302		0.991339	1.00356	1.00998	1.03967	1.02198	0.00934394
6.13333	1.06529	0.997524	1.00394	1.00862	1.04201	0.985404	0.993689	1.00067	1.00359	1.04098	1.01417	0.00820589
6.16667	1.06381	1.01058	1.00489		1.03276		0.991483	1.00789	1.00934	1.03759	1.01979	0.00821815
6.2	1.06487	1.00879	0.998865		1.03596		0.990286	1.0019	1.00836	1.02877	1.01723	0.00866215
6.23333	1.06498	1.01334	1.00338		1.029		0.993382	1.01354	1.01089	1.03901	1.02094	0.00803198
6.26667	1.06476	1.0166	1.00807		1.03949		0.991423	1.00417	1.01165	1.04324	1.02243	0.0086266
6.3	1.06827	1.00769	1.00462		1.03695	0.991263	0.991206	1.00472	1.01472	1.039	1.0176	0.00852323
6.33333	1.0661	1.01109	1.00589		1.04586	0.977988	0.988002	0.999223	1.01102	1.0405	1.01619	0.00962025
6.36667	1.06668	1.0089	0.998537		1.03928		0.990329	1.00501	1.00531	1.03464	1.01859	0.00911646
6.4	1.06833	1.01238	0.998508		1.04279	0.987456	0.990058	1.00537	1.01885	1.03493	1.01763	0.00891173
6.43333	1.06033	1.00621	0.988363		1.04519		0.992453	0.999158	1.00801	1.03491	1.01683	0.00938384
6.46667	1.07138	1.0114	1.00092		1.04559	0.997163	1.00008	1.00852	1.00743	1.03609	1.01984	0.00849817
6.5	1.07051	1.0154	0.988218		1.04309		0.985799	0.996222	1.00523	1.0428	1.01841	0.0108304
6.53333	1.03973	1.00974	0.997827		1.0412		0.99298	0.992492	1.00669	1.0423	1.01537	0.00782098
6.56667	1.07028	0.999206	0.991354		1.03221	0.99596	0.995312	1.00664	1.01435	1.04184	1.01635	0.00888572
6.6	1.06432	1.00017	0.998255		1.03375		0.995691	1.00404	1.00688	1.04049	1.01795	0.00888704
6.63333	1.06462	1.00835	0.988672		1.04056		0.99173	0.998716	1.00972	1.03709	1.01743	0.00956938
6.66667	1.06966	1.00449	0.990664		1.03926	0.994778	0.994445	0.997552	1.01596	1.03653	1.01593	0.00903079
6.7	1.06993	1.00413	0.994785		1.04381	0.994024	0.994865	0.987925	1.0059	1.04619	1.01573	0.00986233
6.73333	1.05749	1.00854	0.986033	1.01909	1.03368		0.987351	0.990019	1.01059	1.03477	1.01417	0.00820275
6.76667	1.05657	1.00612	0.993933		1.0464		0.993592	0.981045	1.01237	1.03824	1.01603	0.00980736
6.8	1.035	1.00701	0.987665	1.00864	1.03726	1.00198	0.990543	0.979401	1.01165	1.04026	1.00994	0.00681111
6.83333	1.07296	1.00487	0.985368		1.03709	0.995845	0.982048	0.976907	1.00827	1.04165	1.01167	0.0107932
6.86667	1.06591	1.01015	0.996918		1.0367	0.997144	0.988605	0.981315	1.00399	1.03911	1.01332	0.00930962
6.9	1.06404	1.00773	0.992752	1.02983	1.0429		0.981433	0.970152	1.00415	1.03411	1.01412	0.0102504
6.93333	1.06816	1.00426	0.986867		1.04149		0.982977	0.972335	1.00397	1.03987	1.01249	0.0119298
6.96667	1.05533	1.00974	0.981838	1.03725	1.03772		0.982512	0.961572	0.999642	1.03719	1.01142	0.0107292
7	1.07186	1.01463	0.98657	1.01351	1.04275		0.987827	0.981027	1.01412	1.03191	1.01602	0.00984885
7.03333	1.06394	1.00241	0.986453	1.00127	1.03468	0.987703	0.986195	0.97259	1.00709	1.03723	1.00796	0.00905455
7.06667	1.0638	1.01659	0.984797	1.00629	1.04223	0.994018	0.976985	0.964778	1.01095	1.03757	1.0098	0.00987525
7.1	1.07115	1.00416	0.98512		1.04651	0.993242	0.977067	0.961056	1.01474	1.0328	1.00954	0.0118008
7.13333	1.07124	1.00809	0.982194		1.04006	0.994278	0.980478	0.958364	1.01503	1.03235	1.00912	0.0116269
7.16667	1.07268	1.00498	0.991537	1.0118	1.04441	0.991834	0.971476	0.953533	1.00669	1.04386	1.00928	0.011371
7.2	1.07557	1.01572	0.979272		1.04325	0.989219	0.968738	0.959806	1.01518	1.04244	1.00991	0.0129715
7.23333	1.06568	1.01172	0.982893	1.01295	1.04482		0.970896	0.946111	1.00703	1.02799	1.00779	0.0123373
7.26667	1.05335	1.00483	0.984791	1.01699	1.04325	0.998697	0.967518	0.951407	1.01159	1.03914	1.00716	0.010452
7.3	1.05857	1.01232	0.989187	0.996208	1.04752	1.00076	0.963841	0.950745	1.00186	1.04017	1.00612	0.0110295
7.33333	1.07445	1.01409	0.982363		1.04797	0.997716	0.967874	0.948281	1.01383	1.03496	1.00906	0.0133022
7.36667	1.06814	1.00809	0.992094	1.02464	1.04194	0.992904	0.962882	0.940212	1.01117	1.03743	1.00795	0.0120339
7.4	1.0649	1.01353	0.983314	1.00567	1.04324	1.00121	0.962188	0.952257	0.999492	1.03751	1.00633	0.0112013
7.43333	1.06824	1.00982	0.984909		1.04438		0.963561	0.950167	1.00683	1.03838	1.00829	0.0144741
7.46667	1.06675	1.01415	0.98529		1.04191		0.962273	0.955165	1.01168	1.03898	1.00953	0.0140108
7.5	1.07161	1.006	0.986922	0.994485	1.0448		0.965417	0.939934	1.00306	1.03562	1.00532	0.01354
7.53333	1.06494	1.00461	0.984464		1.04446	0.994058	0.964209	0.949165	1.00257	1.03532	1.00487	0.0125821
7.56667	1.06819	1.00999	0.981324	1.00339	1.03265	1.00235	0.960643	0.93873	1.01276	1.03621	1.00462	0.0118997
7.6	1.06898	1.00013	0.985197	1.01383	1.04722	1.00205	0.96292	0.935052	1.01128	1.03514	1.00618	0.0124614
7.63333	1.07469	1.00422	0.98439	1.03247	1.04846	0.993876	0.954699	0.944932	0.99647	1.038	1.00722	0.0130385
7.66667	1.06368	1.00415	0.982519	1.02914	1.04716		0.950752	0.938185	0.999898	1.04216	1.0064	0.0144847
7.7	1.06758	1.00603	0.985585		1.04672	0.992273	0.961179	0.936027	1.01213	1.03095	1.00427	0.0137404
7.73333	1.05929	1.00812	0.989938		1.04479		0.956254	0.944756	1.00911	1.03407	1.00579	0.0144108
7.76667	1.06984	1.00606	0.983558		1.04537	0.991928	0.95485	0.933738	1.01019	1.039	1.00384	0.0145435
7.8	1.06846	1.00836	0.989746		1.04066		0.95534	0.931284	1.00272	1.03946	1.0045	0.0161651
7.83333	1.06848	1.01483	0.988888		1.03735	0.990329	0.953082	0.930205	1.00853	1.03645	1.00313	0.0143889
7.86667	1.07359	1.01149	0.98978	1.0091	1.04867	0.995158	0.950725	0.941582	1.00388	1.04106	1.0065	0.0130152
7.9	1.06844	1.0063	0.992845	0.893744	1.04543		0.950456	0.941099	1.01432	1.03833	0.994552	0.0188049
7.93333	1.06735	1.01237	0.991194	1.00891	1.03267		0.958646	0.937556	0.998237	1.04044	1.00526	0.013391
7.96667	1.06956	1.00494	0.992829	1.03637	1.04787	0.998275	0.965116	0.942221	1.00399	1.04638	1.01075	0.0125154
8	1.06594	1.00269	0.982035		1.0427	0.991317	0.954085	0.936663	1.00737	1.03358	1.00182	0.0138691
8.03333	1.07452	1.00195	0.98159	0.990974	1.03229	1.00077	0.950254	0.942682	1.00855	1.03393	1.00175	0.0124608
8.06667	1.06818	1.0133	0.992516		1.03746	1.0043	0.954363	0.940499	1.00719	1.03498	1.00587	0.0133813
8.1	1.06228	1.01036	0.989386	1.00657	1.03359	0.996017	0.956896	0.936823	1.0106	1.03403	1.00366	0.0116774
8.13333	1.07528	1.00067	0.982029	1.01555	1.04049	0.996835	0.954576	0.942165	1.01188	1.03816	1.00576	0.0127171
8.16667	1.08083	1.00006	0.990979	1.00317	1.03736	0.98775	0.953617	0.928346	1.00914	1.04006	1.00313	0.0137621
8.2	1.08151	1.00763	0.992568	1.02449	1.04027	0.995325	0.949628	0.942429	1.01372	1.04066	1.00882	0.0132982
8.23333	1.0801	1.00289	0.988797		1.03514	0.987636	0.949806	0.936017	1.01316	1.03607	1.00329	0.0148733
8.26667	1.07166	1.00428	0.991256	1.00363	1.03397	1.00096	0.959122	0.936056	1.01544	1.04051	1.00569	0.0123439
8.3	1.07056	1.01081	0.993036		1.04031	0.997574	0.954308	0.941565	1.00502	1.03596	1.00546	0.0136051
8.33333	1.07656	1.00832	0.99327	1.02443	1.03049	1.00431	0.954085	0.944144	1.00917	1.04202	1.00868	0.0124032
8.36667	1.076	0.997384	0.993365	1.01576	1.0336	0.993508	0.956824	0.944629	1.00352	1.03045	1.0045	0.0119784
8.4	1.07561	1.00929	0.992077		1.04071	1.006	0.965525	0.940009	1.01004	1.03609	1.00837	0.0134987
8.43333	1.07319	1.00732	0.99396	1.03467	1.03806	0.992481	0.951718	0.947851	0.999879	1.03554	1.00747	0.0124321
8.46667	1.0613	1.00315	0.995525		1.03933	0.995085	0.956559	0.932371	1.01606	1.03797	1.00415	0.0136244
8.5	1.07071	1.01183	0.990815	1.02764	1.03235	0.998917	0.954147	0.937193	1.01358	1.0296	1.00668	0.0123368
8.53333	1.081	0.995717	0.995518		1.03963	1.00768	0.959116	0.942517	1.00307	1.03784	1.0069	0.0140525
8.56667	1.07252	1.00372	0.995135	1.00697	1.04252	1.00085	0.947507	0.936219	1.0086	1.03572	1.00497	0.0129438
8.6	1.07457	1.01378	0.995457	1.011	1.04106	0.995607	0.950732	0.94718	1.02123	1.03467	1.00853	0.0123559
8.63333	1.07823	1.00019	0.993305	1.02651	1.04172	1.00112	0.948843	0.9509	1.01098	1.03711	1.00889	0.0126247
8.66667	1.06674	1.00374	1.00155	1.00488	1.03	0.988894	0.954915	0.946558	1.01026	1.03861	1.00462	0.0114451
8.7	1.07443	1.00232	0.996826	0.997306	1.04552	0.992636	0.954715	0.950754	1.00279	1.03674	1.0054	0.0121242
8.73333	1.07385	0.99996	0.994372		1.03757	0.996439	0.959109	0.94023	1.00161	1.04126	1.00493	0.0137643
8.76667	1.07671	1.00035	1.00134		1.03805	1.00519	0.950068	0.95598	1.01218	1.03387	1.00819	0.0131675
8.8	1.08818	0.998494	1.00167	1.0072	1.04021	0.997103	0.953337	0.946947	1.0098	1.03863	1.00816	0.013069
8.83333	1.07897	1.00138	0.995617		1.03864	0.989153	0.952261	0.947648	1.00196	1.03707	1.00474	0.0139758
8.86667	1.06463	1.00375	1.00353	1.02857	1.04308	0.997879	0.961404	0.950876	1.00994	1.04021	1.01039	0.0112644
8.9	1.07419	0.998669	1.00791	1.02814	1.02877	1.00089	0.954915	0.962955	1.00843	1.03905	1.01039	0.0111106
8.93333	1.0727	0.998741	1.00023		1.04141	0.987914	0.954243	0.942709	1.01954	1.03486	1.00582	0.013853
8.96667	1.07615	0.997966	1.01232		1.0334	1.00012	0.954792	0.949365	1.01969	1.03854	1.00915	0.0133321
9	1.07529	1.00954	1.01107		1.03634	0.995269	0.959759	0.952067	1.01657	1.03916	1.01056	0.0128806
9.03333	1.07735	0.998301	1.01088		1.03886	0.994537	0.966096	0.95084	1.00731		1.00552	0.0140282
9.06667	1.08108	0.992663	1.01521		1.04723	0.984836	0.96052	0.956891	1.01663	1.03433	1.00993	0.0135936
9.1	1.07666	1.00226	1.00538		1.03373	0.995562	0.954264	0.95283	1.00926	1.03044	1.00671	0.0129057
9.13333	1.07809	1.0049	1.00821		1.04087	0.995594	0.955012	0.950508	1.01776	1.03219	1.00924	0.0134042
9.16667	1.06941	0.996194	1.00698		1.04033	0.995426	0.962529	0.955116	1.00433	1.04179	1.00801	0.0124358
9.2	1.08409	0.995867	1.01218		1.04153		0.955464	0.960798	1.0167	1.03559	1.01278	0.0150716
9.23333	1.06928	1.0019	1.00788	1.01504	1.02981	0.998149	0.962984	0.964113	1.01328	1.03833	1.01008	0.0101498
9.26667	1.08157	0.996352	1.012		1.04248	0.992076	0.95472	0.969228	1.00819	1.03032	1.00966	0.0128139
9.3	1.08228	0.987717	1.01238	1.02355	1.04163	1.0014	0.959002	0.966916	1.01032	1.03964	1.01248	0.011671
9.33333	1.07294	0.99607	1.00921		1.03948	0.998746	0.955386	0.966657	1.00928	1.03838	1.00957	0.0122569
9.36667	1.08129	0.997903	1.01096		1.04295	0.996283	0.963033	0.969901	1.00891	1.0322	1.01149	0.0122427
9.4	1.07705	0.992962	1.00671		1.03528	1.00047	0.966871	0.96506	1.00999	1.03633	1.01008	0.0118437
9.43333	1.07733	0.998157	1.01517		1.03725	1.00078	0.961339	0.963442	1.01215	1.03591	1.01128	0.0122046
9.46667	1.08357	0.987629	1.01536		1.04207	0.998363	0.973635	0.975083	1.00999	1.03913	1.01387	0.0119957
9.5	1.08145	0.994346	1.00743		1.03949	1.00878	0.955552	0.966748	1.01159	1.03284	1.01092	0.0126825
9.53333	1.08087	0.999778	1.00902	0.985786	1.03488	1.00301	0.962562	0.965225	1.00507	1.03504	1.00812	0.0111819
9.56667	1.07915	0.997529	1.00589	1.012	1.02735	0.996171	0.968657	0.966915	1.01345	1.03636	1.01035	0.0103929
9.6	1.07956	1.00005	1.01682		1.03261	1.00335	0.962323	0.97059	1.00539	1.03328	1.01155	0.0117307
9.63333	1.07773	0.999151	1.01333		1.03892	0.99902	0.972574	0.977699	1.0136	1.03351	1.01395	0.0108927
9.66667	1.06968	0.994226	1.01341	0.995039	1.0406	0.994821	0.970553	0.964557	1.01406	1.04011	1.00971	0.0104113
9.7	1.08205	0.997726	1.00968	1.02465	1.03523	1.00562	0.967705	0.95778	1.00459	1.03076	1.01158	0.0111373
9.73333	1.06959	0.994073	1.01107	1.01663	1.03156	1.00501	0.975602	0.963937	1.02102	1.03957	1.01281	0.00975321
9.76667	1.07985	0.990508	1.00802		1.04057	0.981399	0.969901	0.97785	1.00647	1.03364	1.0098	0.0119184
9.8	1.08838	1.00136	1.01651	1.02752	1.02579	0.986584	0.971872	0.983255	1.01708	1.03882	1.01572	0.0105873
9.83333	1.0837	0.99183	1.01494		1.04521	0.989042	0.967106	0.982318	1.01018	1.03614	1.01338	0.0121629
9.86667	1.06061	1.00319	1.01469		1.03411	1.00932	0.96952	0.980732	1.00657	1.03459	1.01259	0.00932663
9.9	1.07737	0.999322	1.00277	1.02746	1.03837	1.00805	0.975575	0.986321	1.00178	1.03497	1.0152	0.00941908
9.93333	1.07011	0.998683	1.02258		1.03271	1.01082	0.966514	0.98728	1.00522	1.0242	1.01312	0.00983156
9.96667	1.07347	0.994311	1.0159	1.02976	1.03148	1.00942	0.978206	0.970485	1.01804	1.03143	1.01525	0.00941733
10	1.07841	0.992341	1.01745		1.03326	1.01007	0.974656	0.984739	1.01599	1.03698	1.01599	0.0104862
10.0333	1.06427	0.991205	1.01624		1.03771	1.00936	0.975633	0.985831	1.01062	1.03265	1.01372	0.00932372
10.0667	1.06074	0.987216	1.01408	1.01488	1.03937	1.00267	0.979235	0.973203	1.00866	1.03365	1.01137	0.00875181
10.1	1.07525	0.996099	1.01761	1.01714	1.03847	1.00679	0.975385	0.973912	1.00667	1.03326	1.01406	0.00958529
10.1333	1.07139	0.995745	1.01579		1.03748	1.00706	0.981434	0.98753	1.00714	1.03946	1.01589	0.00961341
10.1667	1.08088	0.999201	1.01723	1.02591	1.04006	1.00683	0.976386	0.990558	1.01751	1.03312	1.01877	0.00924295
10.2	1.08368	0.995411	1.01395		1.03337	1.00063	0.973996	0.979942	1.01158	1.03353	1.01401	0.0111196
10.2333	1.07439	0.990348	1.0159		1.03835	1.00743	0.989213	0.969944		1.04106	1.01583	0.0120321
10.2667	1.06859	0.996167	1.02067	1.02254	1.04638	0.994917	0.979565	0.987832	1.02083	1.03757	1.01751	0.00893052
10.3	1.07202	0.99708	1.02024		1.04067	1.01094	0.973786	0.988087	1.0168	1.03338	1.017	0.00986221
10.3333	1.07599	0.998855	1.00836	0.987729	1.03298	1.00148	0.985975	0.987268	1.01401	1.03093	1.01236	0.00886346
10.3667	1.0771	0.988979	1.01613	0.999144	1.04053	1.00783	0.985718	0.991582		1.03477	1.01575	0.010056
10.4	1.08183	0.987493	1.02797		1.03848	1.00752	0.982453	0.976637	1.01061	1.03375	1.01631	0.0111087
10.4333	1.07382	0.992973	1.0165		1.03516	1.00273	0.980804	0.987352	0.999497	1.03401	1.01365	0.00987676
10.4667	1.07656	0.993816	1.0217	1.02702	1.02606	1.00424	0.994896	0.983578	1.00609	1.03602	1.017	0.00852335
10.5	1.071	1.00384	1.02342		1.04499	1.00117	0.984732	0.988288	1.0134	1.03292	1.0182	0.00934237
10.5333	1.06795	0.98954	1.0182		1.0237	1.01088	0.982956	0.9988	1.01667	1.03283	1.01572	0.00846585
10.5667	1.07072	0.994713	1.01952		1.04523	1.00286	0.98401	0.992046	1.00581	1.03615	1.01678	0.0095657
10.6	1.08095	0.9937	1.02016		1.03351	1.01185	0.990061	0.989129	1.01378	1.03073	1.01821	0.0095956
10.6333	1.07529	0.993697	1.0193	1.02396	1.04155	1.00955	0.980022	0.992475	1.01177	1.03505	1.01827	0.00879358
10.6667	1.07373	0.998346	1.01679	0.990369	1.03561	1.01088	0.998279	1.00269	1.00328	1.03624	1.01662	0.00800833
10.7	1.06848	0.995323	1.02017	1.00269	1.03792	0.998347	0.985171	0.988536	1.00872	1.0306	1.0136	0.00822013
10.7333	1.07287	0.992349	1.02774	1.03258	1.0444	1.0121	0.992612	1.00174	1.00656	1.0341	1.02171	0.00807585
10.7667	1.08071	0.989534	1.02144		1.02936	1.00477	0.990317	1.00081		1.02819	1.01814	0.0105431
10.8	1.06509	0.997967	1.02687		1.0395	1.01649	0.993806	0.997629	1.02297	1.02986	1.02113	0.00767365
10.8333	1.07084	0.996297	1.02575		1.03584	1.01407	0.992219	0.99815	1.00886	1.02762	1.01885	0.00823715
10.8667	1.07901	0.996102	1.02161	1.01214	1.02748	1.0078	0.998562	1.00174		1.03247	1.01966	0.00855567
10.9	1.07832	0.991001	1.02201		1.03103	1.00456	0.993606	1.00912	1.01158	1.03051	1.01908	0.00881544
10.9333	1.06393	0.991279	1.02169		1.03533	0.998255	0.99201	1.00443	1.0146	1.02988	1.01682	0.00792965
10.9667	1.08399	0.987425	1.0233		1.03587	1.00837	0.999135	1.00291	1.00853	1.03424	1.02042	0.00958419
11	1.08164	0.991649	1.0193	1.0193	1.02765	1.00677	1.01148	0.996724	1.01101	1.04062	1.02061	0.00813405
11.0333	1.05738	0.99246	1.01538		1.03199	1.00228	0.999109	0.997184	1.01249	1.02964	1.01532	0.00701647
11.0667	1.09373	0.993295	1.02933	0.843627	1.02659	1.00447	0.989714	0.999948	1.00263	1.03213	1.00155	0.0199973
11.1	1.07519	0.983878	1.03099	1.01576	1.03579	1.01637	0.993069	1.00205	1.01869	1.03688	1.02087	0.00821801
11.1333	1.0767	0.985243	1.01692	1.02627	1.03779	0.998729	1.0035	1.00585	0.968405	1.03062	1.015	0.00956717
11.1667	1.07032	0.990854	1.01997		1.02648	1.00674	1.0035	1.00069	1.00091	1.02949	1.01655	0.00798674
11.2	1.07263	0.997188	1.01375		1.03321	1.00702	0.996158	1.00597	1.00786	1.03029	1.01823	0.00804788
11.2333	1.07117	0.992874	1.02648	1.01609	1.02457	1.00676	1.00106	1.00974	1.0085	1.03837	1.01956	0.00710189
11.2667	1.06351	0.990547	1.02219		1.03414	1.01108	1.00165	1.00216	1.00624	1.03528	1.01853	0.00754956
11.3	1.07166	0.993897	1.0234	1.02233	1.02144	1.01418	0.999177	0.99321	1.0083	1.03133	1.01789	0.00728395
11.3333	1.08088	0.987248	1.02527	1.0205	1.03547	1.01051	0.999967	0.98767	1.01062	1.03015	1.01883	0.00866678
11.3667	1.08928	0.989502	1.02635		1.03874	1.0095	0.994426	0.9872	1.01469	1.02994	1.01996	0.0105992
11.4	1.09615	0.988546	1.02364		1.02941	1.01567	0.999821	0.990109	1.01116	1.03012	1.02051	0.0107929
11.4333	1.07782	0.981576	1.02881		1.03016	1.01201	1.00675	0.971014	1.01347	1.03826	1.01776	0.0105218
11.4667	1.07322	0.987689	1.03265	1.01914	1.02888	1.01371	1.00357	0.976829	1.00499	1.03184	1.01725	0.00854955
11.5	1.08525	0.983608	1.03182	1.0181	1.03643	1.02645	1.00966	0.971413	1.01386	1.02571	1.02023	0.00976086
11.5333	1.06771	0.989146	1.02174		1.02723	1.01019	1.00101	0.976195	1.01223	1.01833	1.01375	0.00863721
11.5667	1.09339	0.984684	1.01995		1.02672	1.01073	0.995682	0.970896	1.00887	1.02875	1.01552	0.0116583
11.6	1.07356	0.989104	1.02774		1.03216	1.01871	1.00498	0.962305	1.00823	1.03291	1.01663	0.0104014
11.6333	1.07568	0.990367	1.02524		1.04299	1.01869	0.986584	0.960917	1.01772	1.03364	1.01687	0.0113322
11.6667	1.07078	0.992133	1.02562		1.02298	1.00552	0.992206	0.950039	1.00856	1.02777	1.01062	0.0109752
11.7	1.07734	0.988913	1.02944		1.02614	1.01146	0.992848	0.955159	1.01001	1.02805	1.01326	0.0112741
11.7333	1.06896	1.00256	1.02458		1.03269	1.01016	0.989106	0.956985	0.999897	1.03344	1.01315	0.0105855
11.7667	1.07141	0.991868	1.03019	1.018	1.02169	1.00799	0.993668	0.948876	1.01322	1.03087	1.01278	0.0100464
11.8	1.07583	0.994462	1.02962		1.02789	1.01476	0.984745	0.952294	1.01265	1.03203	1.01381	0.0115665
11.8333	1.06397	0.994399	1.01577	1.03206	1.03268	1.01781	0.992443	0.956013	1.01115	1.02531	1.01416	0.00915117
11.8667	1.072	0.991311	1.02883	1.01727	1.02547	1.01788	0.986445	0.95475	1.01687	1.02886	1.01397	0.00986316
11.9	1.07277	0.98495	0.965842		1.02127	1.01206	0.975809	0.958809	1.01345	1.0265	1.0035	0.0119846
11.9333	1.07427	0.99387	1.02578	1.00917	1.02305	1.01395	0.983423	0.967431	1.00157	1.03366	1.01262	0.00937349
11.9667	1.05456	0.993118	1.02431	1.01093	1.02436	1.00948	0.986628	0.97174	1.00772	1.03233	1.01152	0.00758215
12	1.06123	0.991324	1.02086		1.03191	1.00857	0.984631	0.976098	1.01386	1.02971	1.01313	0.00888303
12.0333	1.07379	0.991856	1.03476	1.01832	1.03282	1.0103	0.992013	0.990039		1.02674	1.01896	0.00903827
12.0667	1.07119	0.992285	1.02404		1.01939	1.01263	0.993716	0.976232	1.00956	1.02986	1.01432	0.00911508
12.1	1.07287	0.99724	1.02501	1.01501	1.03158	1.01262	0.990662	0.989356	1.01348	1.03251	1.01803	0.00782578
12.1333	1.06135	0.998297	1.02237	1.01699	1.0306	1.01214	0.987707	0.992031	1.01617	1.02637	1.0164	0.00676663
12.1667	1.06872	0.991766	1.02986		1.02103	1.00979	0.986692	0.987382	1.01493	1.02995	1.01557	0.00873598
12.2	1.06982	0.994054	1.02335		1.03318	1.01037	0.995441	0.985963	1.01275	1.01702	1.01577	0.00841201
12.2333	1.06678	0.98877	1.02512		1.02649	1.01523	0.993493	0.97781	1.00773	1.03144	1.01476	0.00895367
12.2667	1.0743	0.98776	1.02712		1.0394	1.02071	1.00106	0.985533	1.00568	1.02002	1.01795	0.00922664
12.3	1.10065	0.990764	1.0238		1.02884	1.005	1.00274	0.983819	1.00517	1.03182	1.01918	0.0115698
12.3333	1.06536	0.994735	1.0337		1.02613	1.00377	0.996998	0.979819	1.01435	1.0303	1.01613	0.00860436
12.3667	1.07506	0.994165	1.02692		1.02611	1.01021	0.994138	0.981214	1.01294	1.0298	1.01673	0.00920669
12.4	1.07818	0.992984	1.02405		1.03053	1.01257	1.004	0.99217	1.0161	1.03106	1.02018	0.00871266
12.4333	1.0703	0.99557	1.02938		1.03316	0.997781	1.00039	0.987554	1.01707	1.02936	1.01784	0.00863904
12.4667	1.07409	0.990423	1.03336		1.02038	1.0016	1.00174	0.985345	1.0116	1.02445	1.01589	0.00896771
12.5	1.06916	0.994196	1.02144		1.01484	1.01045	1.00333	0.989947	1.01116	1.03064	1.01613	0.00785318
12.5333	1.06413	0.988528	1.0289	0.995886	1.03197	1.01336	1.00005	0.986387	1.00714	1.03118	1.01475	0.00769487
12.5667	1.07567	0.995059	1.03338		1.02445	1.0083	1.00139	0.990312	1.01364	1.03292	1.01946	0.00873192
12.6	1.0671	0.989841	1.02421	0.998621	1.02872	0.999542	1.00312	0.997955	1.01122	1.02568	1.0146	0.00721601
12.6333	1.07128	0.987337	1.03939		1.02495	1.00175	0.998854	0.992468	1.01349	1.0283	1.01754	0.00889119
12.6667	1.06965	0.99674	1.03192		1.0276	0.999515	1.00502	0.990526	1.01654	1.03168	1.0188	0.00821114
12.7	1.06227	0.98894	1.03335		1.03316	0.998267	0.996625	0.98584	1.01569	1.03002	1.01602	0.00855115
12.7333	1.07578	0.992062	1.03329		1.01968	0.994493	0.997887	0.998019	1.01334	1.03029	1.0172	0.00895294
12.7667	1.07157	0.992521	1.02292		1.02536	0.979599	0.993375	0.999727	1.01077	1.02829	1.01379	0.0091375
12.8	1.06433	1.00036	1.02812		1.02654	0.984932	1.00003	0.986015	1.01021	1.02103	1.01351	0.00830097
12.8333	1.07437	0.998413	1.0254		1.02802	0.98727	1.00166	1.00441	1.00843	1.03094	1.01766	0.00863648
12.8667	1.06879	0.992884	1.02977		1.02739	0.984043	0.99839	0.988053	1.00908	1.03134	1.01441	0.0091386
12.9	1.0747	0.99491	1.0287		1.02868	0.985	1.00082	0.982493	1.00757	1.03539	1.01536	0.00983937
12.9333	1.06477	0.993767	1.02523		1.02911	0.987138	1.00191	1.00167	1.01428	1.02997	1.01643	0.00796115
12.9667	1.0709	0.996343	1.03986		1.02597	0.985949	0.993069	0.998697	1.01429	1.02581	1.01677	0.00904578
13	1.06518	0.990103	1.02845		1.02904	0.993678	0.994428	1.00016	1.01576	1.03571	1.01695	0.00834101
13.0333	1.06792	0.992063	1.03039	0.983787	1.02498	0.972148	1.00788	0.989897	1.01352	1.0208	1.01034	0.00880253
13.0667	1.06023	0.992143	1.03113	1.0107	1.02442	0.979478	0.997345	1.00256	1.01538	1.03186	1.01453	0.007413
13.1	1.06676	0.994579	1.03284	1.00359	1.01711	0.995065	0.999631	0.995662	1.00969	1.03142	1.01463	0.00734344
13.1333	1.07033	0.988046	1.02952		1.01604	0.979625	0.999031	0.999147	1.02175	1.02834	1.01465	0.00911325
13.1667	1.07605	0.995161	1.03395	1.0225	1.03079	0.989031	1.00133	0.988	1.0125	1.02953	1.01789	0.00850502
13.2	1.06945	0.992336	1.0258		1.02721	0.994704	0.998756	0.993321	1.00853	1.03196	1.01579	0.00851009
13.2333	1.06517	0.988877	1.03367		1.0277	0.984099	0.991797	1.00362	1.01645	1.03244	1.01598	0.00884265
13.2667	1.07202	0.994046	1.0362		1.02739	0.990724	0.98857	0.997024	1.00238	1.02513	1.01483	0.00925406
13.3	1.07134	0.985038	1.03163		1.02502	1.00061	1.01314	0.993764	0.997355	1.02281	1.01563	0.00872306
13.3333	1.07034	0.98971	1.03525		1.02028	1.01246	1.00201	0.999498	1.01102	1.0294	1.01888	0.00802996
13.3667	1.07184	0.992988	1.03226	1.0043	1.02071	0.985452	1.004	1.00145	1.01739	1.02531	1.01557	0.00777924
13.4	1.07181	0.986797	1.02902		1.01611	0.994747	1.00426	0.993045	1.01235	1.02958	1.0153	0.00869768
13.4333	1.05689	0.99107	1.03359		1.02392	0.991637	1.00446	0.995869	1.0084	1.01776	1.01373	0.00727669
13.4667	1.0747	0.987573	1.03012	1.00432	1.02692	0.991333	1.00198	1.00289	1.00597	1.0202	1.0146	0.00801631
13.5	1.07787	0.993034	1.02546		1.02623	0.995604	1.0023	0.996823	1.00971	1.03323	1.01781	0.00899707
13.5333	1.06666	0.984523	1.0293		1.02208	0.985633	1.00936	1.00328	1.00865	1.03051	1.01555	0.00846731
13.5667	1.06735	0.990097	1.03503	1.01626	1.02393	0.991151	0.998779	0.984997	1.0141		1.01352	0.00878474
13.6	1.06195	0.988204	1.03213		1.03264	0.985744	1.0021	0.997357	1.01037	1.02663	1.01524	0.00834688
13.6333	1.06549	0.988139	1.03272		1.02765	0.995519	1.00527	0.99525	1.00784	1.02189	1.01553	0.00808419
13.6667	1.06261	0.98515	1.03254	1.02597	1.03105	0.982649	1.01106	0.994972	1.00606	1.03211	1.01642	0.00792958
13.7	1.07079	0.984049	1.02677		1.02156	0.986314	1.00242	0.997623	1.00553	1.0221	1.01302	0.00885033
13.7333	1.06433	0.987876	1.02409	1.02136	1.02025	0.994302	1.00395	1.00418	1.00378		1.01379	0.00754621
13.7667	1.0672	0.989564	1.02853	1.01851	1.02832	1.00017	0.99	0.998453	1.00885	1.02066	1.01503	0.0074035
13.8	1.07122	0.990905	1.02991		1.03198	0.993512	1.00262	1.00842	1.00723		1.01697	0.00939142
13.8333	1.06572	0.990442	1.03307		1.02635	0.986758	1.00235	1.00874	1.00715	1.01998	1.01562	0.00808893
13.8667	1.04687	0.979111	1.02472		1.0228	0.990824	1.00086	1.00221	1.00646	1.01994	1.01042	0.00678569
13.9	1.06628	0.984817	1.02564		1.02703	0.992765	1.00661	1.00296	1.00208	1.02801	1.01513	0.00820294
13.9333	1.06763	0.983549	1.03123		1.0231	0.993837	1.00516	1.00242	0.945106	1.02465	1.00852	0.0114209
13.9667	1.06742	0.968438	1.02563		1.01981	0.994782	0.995282	1.00902	1.00405	1.01531	1.01108	0.00902686
14	1.06353	0.992605	1.025		1.01931	1.00238	0.994756	1.00557	1.00642	1.01634	1.01399	0.0071687
14.0333	1.05884	0.982209	1.03117		1.02138	0.988302	1.00646	0.994188	1.00911	1.01478	1.01183	0.00787267
14.0667	1.05894	0.982701	1.02656		1.02868	0.986379	1.01555	1.00479	1.0015	1.02198	1.01412	0.00785512
14.1	1.06474	0.980381	1.02847		0.990272	1.00346	1.0085	1.00995	0.989155	1.02135	1.0107	0.0085047
14.1333	1.06858	0.984518	1.0231		1.02788	0.997975	1.00214	1.00677	0.997623	1.02467	1.01481	0.00829125
14.1667	1.06358	0.978848	1.02662		1.02541	0.995421	1.00193	0.996038		1.02041	1.01353	0.00929298
14.2	1.06245	0.975368	1.02872	1.01006	1.03702	1.00124	0.999029	1.00921	0.994262	1.02012	1.01375	0.00777332
14.2333	1.05727	0.986418	1.0321	1.01549	1.02677	1.00081	0.994265	1.00849	0.993266	1.01791	1.01328	0.0067979
14.2667	1.05134	0.982826	1.02461		1.0199	0.998845	0.998988	1.01123	0.994547	1.02156	1.01154	0.00682835
14.3	1.08215	0.984696	1.0303	1.00837	1.02491	0.999552	0.996452	0.996773	1.00277	1.026	1.0152	0.00881223
14.3333	1.06444	0.982893	1.02357		1.01467	0.993884	1.00754	0.994176	0.995017	1.01792	1.01046	0.00808477
14.3667	1.06676	0.980461	1.02254		1.02575	1.00039	0.996398	1.00185	0.93726	1.02121	1.00585	0.0118467
14.4	1.06242	0.985714	1.02978		1.02077	1.00011	0.998107	0.998183	0.998342	1.02605	1.01328	0.0079242
14.4333	1.05894	0.982184	1.03174	0.997121	1.02689	0.986719	1.00206	1.00255	0.998235	1.02758	1.0114	0.00758684
14.4667	1.06464	0.984337	1.02931		1.02428	1.00437	1.00415	1.00352	0.991716	1.02188	1.01424	0.00802928
14.5	1.05738	0.972299	1.02962		1.02182	1.00245	0.999388	1.01426	0.990182	1.02086	1.01203	0.00820909
14.5333	1.05741	0.970798	1.02614	1.00406	1.03031	0.998911	0.99696	1.01172	0.962772	1.01857	1.00777	0.00884602
14.5667	1.07311	0.981457	1.03804		1.02667	0.994462	1.00024	1.01606	0.985678	1.01472	1.01449	0.0096225
14.6	1.0627	0.974615	1.0318		1.01561	0.997228	1.00108	1.01531	0.987891	1.03155	1.01309	0.00887755
14.6333	1.06548	0.975872	1.02261	0.83784	1.02481	0.99441	1.006	1.00314	0.997844	1.02512	0.995313	0.0190864
14.6667	1.06638	0.979762	1.02944		1.02641	0.99213	1.00585	1.00592	0.932242	1.02046	1.00651	0.0124382
14.7	1.05537	0.977098	1.03182	1.00267	1.02046	0.989893	1.00522	1.00949		1.02044	1.01249	0.00769217
14.7333	1.06665	0.982838	1.02657	0.988995	1.02748	1.004	1.00603	1.00982	0.993649	1.01853	1.01246	0.00767342
14.7667	1.07156	0.975452	1.0297		1.02179	0.981499	1.0075	1.00613	0.983145	1.02233	1.01101	0.0100056
14.8	1.06847	0.982101	1.02392		1.02348	0.999729	0.99901	1.00875	0.978296	1.02105	1.01165	0.00905504
14.8333	1.06531	0.975816	1.02123	1.01797	1.01889	0.997422	1.00038	1.00954	0.992578	1.02934	1.01285	0.00770533
14.8667	1.06977	0.98449	1.02952		1.01988	1.0007	1.00412	1.01268	0.987296	0.98311	1.01018	0.00918088
14.9	1.05727	0.981079	1.02284	1.019	1.0265	0.997448	0.999888	1.00531	0.984392	1.02294	1.01167	0.00720031
14.9333	1.06308	0.985625	1.03811	1.00886	1.02499	1.00311	1.005	1.01781	0.979326	1.0192	1.01451	0.00773406
14.9667	1.06278	0.980529	1.02567		1.0246	0.995956	1.00479	1.01624	0.960297	1.02404	1.01054	0.00988927
15	1.06386	0.977133	1.01858		1.01852		1.00309	1.01981	0.982946	1.03048	1.0143	0.00970562
15.0333	1.06471	0.977501	1.03063		1.02855	0.996156	1.00885	1.0126	0.981633	1.02598	1.01407	0.00907542
15.0667	1.05878	0.979871	1.02634	0.996566	1.02864	1.00021	1.00158	1.01044	0.98052	1.02729	1.01102	0.00775059
15.1	1.06327	0.97844	1.02406		1.02782	0.991956	1.00362	1.01316	0.981202	1.02417	1.01197	0.00891389
15.1333	1.06251	0.970198	1.02698		1.01927	0.995083	1.00615	1.01864	0.981095		1.00999	0.0102326
15.1667	1.06549	0.958008	1.01814		1.02878	0.989396	1.01122	1.02374	0.979325	1.03132	1.01171	0.0106626
15.2	1.061	0.967158	1.02434		1.02813	0.997647	1.00037	1.01052	0.973904	1.02387	1.00966	0.00965412
15.2333	1.06473	0.969081	1.02704		1.01516	0.99302	1.01344	1.01165	0.982402	1.0188	1.01059	0.00922342
15.2667	1.05693	0.974436	1.01828		1.02757	0.997882	0.995002	1.0201	0.908919	1.01917	1.00203	0.0139685
15.3	1.04975	0.975197	1.03168	0.999314	1.02447	0.992251	1.00462	1.01143	0.980022	1.01565	1.00844	0.00733129
15.3333	1.0507	0.976885	1.02728		1.02692	0.995337	1.00566	1.00737	0.967214	1.02038	1.00864	0.00874044
15.3667	1.06504	0.975254	1.01529		1.02551	1.01344	0.997531	1.01511	0.978215	1.02188	1.01192	0.00898819
15.4	1.06227	0.976945	1.02378		1.01698	0.995467	0.997887	1.01477	0.976649	1.01676	1.00906	0.00881468
15.4333	1.06468	0.977169	1.03459		1.02777	0.999753	1.01324	1.00292	0.980464	1.01813	1.01319	0.00912972
15.4667	1.06313	0.978531	1.01998		1.02341	0.990858	1.00676	1.00061	0.971992	1.00798	1.00703	0.00907274
15.5	1.06127	0.964335	1.02887		1.0181	1.00561	1.00224	1.00526	0.969646	1.02151	1.00854	0.00984569
15.5333	1.06611	0.966094	1.01076		1.03009	0.996448	1.00777	1.01041	0.975046	1.01422	1.00855	0.00978249
15.5667	1.04344	0.972424	1.02692	1.01949	1.01482	1.00125	0.997099	1.01124	0.980461	1.01142	1.00786	0.00666935
15.6	1.0573	0.976413	1.02931		1.018	1.00139	1.0049	1.01003	0.966237	1.02552	1.0099	0.00917286
15.6333	1.06737	0.969016	1.0211		1.02102	1.00164	0.999773	0.994784	0.982092	1.02508	1.0091	0.00958892
15.6667	1.06462	0.977399	1.01984		1.03152	0.996809	1.00393	1.00577	0.987117	1.02338	1.01227	0.00873332
15.7	1.06532	0.975593	1.02596	0.997653	1.02357	0.994745	1.00247	1.01323	0.970201	1.02194	1.00907	0.00872606
15.7333	1.06662	0.978404	1.01916		0.995472	0.997933	0.997371	1.00674	0.977398	1.02733	1.00738	0.00921695
15.7667	1.06404	0.9793	1.00898	0.984429	1.01218	1.00218	0.998941	1.00933	0.98854	1.02592	1.00738	0.00771126
15.8	1.0587	0.97427	1.01502		1.01742	1.00688	1.00537	1.0159	0.970362		1.00799	0.00975948
15.8333	1.07528	0.968186	1.01952	0.996414	1.01651	1.00314	0.997759	1.0083	0.981062	1.03073	1.00969	0.00930578
15.8667	1.0526	0.978251	1.00139		1.01647	0.999612	0.996381	1.01657	0.969413	1.0266	1.00637	0.00839915
15.9	1.05594	0.980077	1.00181	1.00233	1.02092	0.995132	0.990489	0.998062	0.977247	1.02811	1.00501	0.00756236
15.9333	1.04303	0.976351	1.00632		1.01931	0.999223	1.00312	1.00015	0.977301		1.0031	0.00764411
15.9667	1.04682	0.979694	0.997435	1.01029	1.02497	1.00116	0.994056	1.00445	0.982503	1.01462	1.0056	0.00632772
16	1.05738	0.973967	0.997179		1.01483	0.998404	0.999758	0.992595	0.975307	1.02922	1.00429	0.00878218
16.0333	1.05376	0.978671	1.00503		1.01305	0.998889	1.00369	1.00214	0.98135	1.01682	1.00593	0.00733494
16.0667	1.05922	0.974939	0.999832	0.845719	0.934802	1.00611	0.99199	1.00788	0.97969	1.0209	0.982106	0.018257
16.1	1.05689	0.969816	1.01145	0.967027	1.01743	1.00029	0.994165	1.01334	0.983933	1.01013	1.00245	0.00828821
16.1333	1.04872	0.966159	1.00687		1.0108	1.00351	0.997299	0.998067	0.979856	1.01491	1.00291	0.00768996
16.1667	1.04478	0.981789	0.998081	0.973486	1.01012	1.00207	1.00892	1.00391	0.98328	1.01186	1.00183	0.00635276
16.2	1.04338	0.96676	1.00972		1.01969	1.00584	1.00878	1.01205	0.977433	0.998099	1.00464	0.00749491
16.2333	1.04806	0.968623	0.995901	0.982739	1.00823	1.00259	0.99991	1.00023	0.984966	1.00191	0.999315	0.00658972
16.2667	1.04067	0.975166	1.00322	0.989193	1.01001	1.00424	0.990346	1.0129	0.980086	0.997079	1.00029	0.00594454
16.3	1.04307	0.966305	0.989633		1.01628	0.997774	0.997987	1.01223	0.98014	0.99488	0.999811	0.00739902
16.3333	1.03121	0.978292	0.997754	0.973297	1.01187	1.00396	0.998016	1.00486	0.969834	0.98532	0.995441	0.00602325
16.3667	1.04769	0.976144	0.99142		1.02593	1.00301	0.997845	0.988511	0.975546	0.98974	0.999537	0.00784941
16.4	1.04436	0.968912	1.00681	1.01647	1.0254	1.01071	0.999025	0.993329	0.989509	1.00229	1.00568	0.00654007
16.4333	1.03751	0.975631	0.997354	0.986673	1.00371	1.00761	0.992628	1.00303	0.975395	1.01327	0.999281	0.00586616
16.4667	1.0324	0.975938	0.989977		1.01106	0.996309	1.00279	1.00077	0.981208	1.0249	1.00171	0.00625853
16.5	1.01601	0.977696	0.984611	0.984542	1.01992	1.01113	1.00091	1.0074	0.982361	1.00557	0.999015	0.00487409
16.5333	1.03114	0.976265	0.986352	0.992951	1.01064	1.00448	0.998492	0.992512	0.97953	1.02015	0.999251	0.00555798
16.5667	1.03965	0.984343	0.973534		1.0212	1.00659	0.994647	0.994785	0.986056	1.01464	1.00172	0.0069206
16.6	1.03944	0.976051	0.967135		1.0134	1.00516	0.99748	1.00455	0.977222	1.01009	0.998947	0.00750287
16.6333	1.03447	0.981706	0.982668	1.00356	1.01312	1.00803	1.00276	1.0017	0.970077	1.02343	1.00215	0.00621926
16.6667	1.03799	0.989393	1.00194	0.98448	0.993405	1.01209	0.983536	1.00859	0.959065	1.01182	0.998232	0.00676531
16.7	1.02231	0.977223	0.997256	0.994963	1.0121	1.00809	1.00083	1.01327	0.973233	1.02405	1.00233	0.0054555
16.7333	1.0359	0.982147	1.00116	0.976471	0.997938	1.00758	0.989028	1.00959	0.970441	1.01975	0.999001	0.00640364
16.7667	1.04602	0.9862	0.991591	1.00983	1.0059	1.00904	0.993318	1.00035	0.978086	1.00772	1.00281	0.00586735
16.8	1.01841	0.979115	0.984824	0.98949	1.00219	1.01074	0.993706	1.00795	0.978704	1.02015	0.998528	0.00491785
16.8333	1.03294	0.982183	0.993452	0.809343	1.00282	1.00517	0.994995	1.0094	0.974545	1.01566	0.982051	0.0198928
16.8667	1.01812	0.975293	0.993886	0.976806	1.0088	1.02134	0.984082	1.0034	0.963737	1.01095	0.995642	0.0062866
16.9	1.0249	0.961995	0.998356	0.974296	1.00988	1.01726	0.982531	1.00269	0.972998	1.01777	0.996268	0.00694526
16.9333	1.02808	0.96459	0.982779	0.975957	1.00793	1.01438	0.989828	0.996818	0.975846	1.01122	0.994743	0.00644064
16.9667	1.03081	0.961212	0.9887	0.815938	1.00705	1.01505	0.97946	0.996509	0.975233	0.988045	0.9758	0.0188769
17	1.02073	0.94964	0.989154	0.979144	1.01168	1.02088	0.985234	0.993146	0.974051	0.997476	0.992113	0.00700284
17.0333	1.01027	0.957054	0.982526	0.823085	1.01217	1.00778	0.974829	0.993815	0.973775		0.970589	0.0194855
17.0667	1.01991	0.969257	0.983791		0.999856	1.01569	0.991993	0.99139	0.973574	1.01129	0.995195	0.00601701
17.1	1.01517	0.964856	0.980643	1.02781	0.999859	1.01138	0.987173	0.99292	0.978204	1.00625	0.996427	0.00609561
17.1333	1.02217	0.95906	0.988983		1.00406	1.00917	0.986686	0.978249	0.983459	1.00949	0.993481	0.00647766
17.1667	0.998588	0.959633	0.981829		0.995256	1.02619	0.980424	0.969277	0.977746	1.00276	0.987967	0.00666338
17.2	0.997879	0.963585	0.980524	0.972546	1.00153	1.01497	0.990867	0.970265	0.974357	1.0067	0.987323	0.00553067
17.2333	1.01885	0.963256	0.976912	0.963464	1.0001	1.01827	0.986497	0.959593	0.98277	0.996677	0.986638	0.0068676
17.2667	1.0084	0.959717	0.967918	1.01373	0.979699	1.02485	0.984545	0.951381	0.984429	0.996912	0.987158	0.00756177
17.3	1.0165	0.949855	0.967663		0.997433	1.0119	0.984799	0.960996	0.987874	1.00039	0.986379	0.0076472
17.3333	1.01493	0.959953	0.972834		1.00659	1.01096	0.978559	0.936138	0.990868	0.992612	0.984827	0.0086056
17.3667	1.02081	0.955002	0.970488		1.01212	1.01909	0.972065	0.927992	0.990149	1.00199	0.985523	0.0105542
[truncated: 229 more rows]
