# Supplementary material for: All-optical closed-loop voltage clamp for precise control of muscles and neurons in live animals
Source: Research Square preprint supplement (doi:10.21203/rs.3.rs-1505565/v1), 2023-03-29
Supplement: Supplementary file 16 [file e699f65de90be5a82a8c230b.xlsx]

## Sheet: ED Figure 7A
Time (s)	DF/F0		Time (s)	Membrane potential
0	6.57		0	-27.3144
0.01	5.75		0.0005	-27.5331
0.02	3.54		0.001	-27.1894
0.03	2.14		0.0015	-27.5644
0.04	1.94		0.002	-27.1894
0.05	1.9		0.0025	-26.6581
0.06	1.89		0.003	-26.8769
0.07	0.92		0.0035	-27.5019
0.08	1.2		0.004	-27.0956
0.09	0.48		0.0045	-27.3769
0.1	0.64		0.005	-27.0956
0.11	-0.2		0.0055	-26.8769
0.12	-0.09		0.006	-26.5956
0.13	0.13		0.0065	-27.1894
0.14	-0.8		0.007	-26.5018
0.15	-0.47		0.0075	-26.8456
0.16	0.21		0.008	-27.3456
0.17	-0.32		0.0085	-26.5018
0.18	-0.54		0.009	-26.7206
0.19	-0.21		0.0095	-26.5331
0.2	-1.29		0.01	-26.8769
0.21	-0.76		0.0105	-26.5331
0.22	-1.06		0.011	-26.7519
0.23	-1.23		0.0115	-26.4393
0.24	-1.33		0.012	-26.5643
0.25	-0.13		0.0125	-26.8456
0.26	-0.72		0.013	-26.5018
0.27	-0.84		0.0135	-26.4393
0.28	-0.05		0.014	-27.0331
0.29	-1.44		0.0145	-26.0018
0.3	-0.99		0.015	-27.5331
0.31	-0.74		0.0155	-26.7831
0.32	-1.15		0.016	-26.7831
0.33	-0.78		0.0165	-26.8769
0.34	-0.89		0.017	-26.3456
0.35	-0.69		0.0175	-26.5643
0.36	-0.95		0.018	-27.4081
0.37	-1.49		0.0185	-26.1581
0.38	-0.5		0.019	-26.5643
0.39	-1.38		0.0195	-27.1269
0.4	-0.49		0.02	-26.3143
0.41	-0.31		0.0205	-26.5643
0.42	-0.47		0.021	-26.9081
0.43	-0.3		0.0215	-26.6893
0.44	-0.73		0.022	-26.8456
0.45	-0.79		0.0225	-27.0644
0.46	-0.57		0.023	-26.6581
0.47	-0.89		0.0235	-26.6268
0.48	-1.15		0.024	-26.9394
0.49	-0.6		0.0245	-26.7831
0.5	-0.2		0.025	-26.4393
0.51	-1.54		0.0255	-27.0331
0.52	-1.1		0.026	-27.0019
0.53	-0.37		0.0265	-26.7831
0.54	-0.67		0.027	-26.8769
0.55	-0.26		0.0275	-26.5956
0.56	-1.11		0.028	-27.0956
0.57	-0.23		0.0285	-27.0019
0.58	-0.14		0.029	-26.4706
0.59	-1.48		0.0295	-26.7831
0.6	-0.82		0.03	-26.6268
0.61	-1.58		0.0305	-26.6893
0.62	-1.58		0.031	-27.5644
0.63	-1.34		0.0315	-27.1269
0.64	-0.62		0.032	-27.1581
0.65	-0.42		0.0325	-27.1581
0.66	-0.97		0.033	-26.9706
0.67	-1.56		0.0335	-26.9706
0.68	-1.19		0.034	-27.3456
0.69	-1.27		0.0345	-27.4394
0.7	-0.11		0.035	-26.9706
0.71	-1.34		0.0355	-26.9706
0.72	-0.37		0.036	-27.0644
0.73	-1.09		0.0365	-27.4394
0.74	-2.12		0.037	-27.0956
0.75	-0.95		0.0375	-27.3144
0.76	-0.67		0.038	-27.1581
0.77	-0.53		0.0385	-27.1894
0.78	-0.57		0.039	-27.5019
0.79	-1.07		0.0395	-27.3769
0.8	-0.72		0.04	-27.2831
0.81	-0.76		0.0405	-27.9707
0.82	-1.13		0.041	-27.9394
0.83	-0.24		0.0415	-27.4081
0.84	-1.13		0.042	-27.5644
0.85	-1.22		0.0425	-27.3456
0.86	0.33		0.043	-27.5644
0.87	-0.49		0.0435	-27.9394
0.88	0.11		0.044	-27.7832
0.89	0.07		0.0445	-27.9082
0.9	-0.1		0.045	-27.8769
0.91	0.65		0.0455	-27.9082
0.92	0.78		0.046	-27.5019
0.93	0.43		0.0465	-27.9707
0.94	0.16		0.047	-27.8144
0.95	0		0.0475	-28.1269
0.96	-0.11		0.048	-27.9082
0.97	-0.09		0.0485	-27.9082
0.98	0.45		0.049	-28.6582
0.99	1.22		0.0495	-28.5957
1	2.07		0.05	-28.1895
1.01	1.58		0.0505	-28.502
1.02	1.7		0.051	-28.5332
1.03	0.89		0.0515	-28.3145
1.04	1.7		0.052	-28.752
1.05	0.97		0.0525	-28.6582
1.06	0.78		0.053	-28.3145
1.07	2.39		0.0535	-28.752
1.08	1.58		0.054	-28.4707
1.09	1.92		0.0545	-28.877
1.1	1.34		0.055	-28.8457
1.11	1.64		0.0555	-29.0958
1.12	1.77		0.056	-29.4083
1.13	0.9		0.0565	-29.0958
1.14	0.68		0.057	-28.9707
1.15	1.24		0.0575	-29.6271
1.16	1.37		0.058	-29.3458
1.17	1.55		0.0585	-29.4083
1.18	1.28		0.059	-28.9395
1.19	1.66		0.0595	-29.3145
1.2	2.68		0.06	-29.377
1.21	2.09		0.0605	-29.377
1.22	2.43		0.061	-29.6271
1.23	1.97		0.0615	-29.4395
1.24	2		0.062	-29.4083
1.25	2.23		0.0625	-30.1271
1.26	2.41		0.063	-29.8458
1.27	3.3		0.0635	-29.6583
1.28	2.8		0.064	-30.2833
1.29	2.41		0.0645	-29.6583
1.3	2.41		0.065	-29.7521
1.31	2.64		0.0655	-29.9708
1.32	2.7		0.066	-30.2521
1.33	2.3		0.0665	-29.5333
1.34	2.25		0.067	-29.6583
1.35	1.74		0.0675	-29.7833
1.36	1.37		0.068	-30.1271
1.37	0.38		0.0685	-30.0646
1.38	1.21		0.069	-30.0333
1.39	1.07		0.0695	-29.1895
1.4	1.4		0.07	-30.1896
1.41	2.1		0.0705	-30.1583
1.42	1.37		0.071	-30.7521
1.43	1.5		0.0715	-30.6271
1.44	1.75		0.072	-30.7521
1.45	2.14		0.0725	-30.4708
1.46	1.29		0.073	-30.6584
1.47	0.91		0.0735	-31.0646
1.48	1.19		0.074	-31.3772
1.49	1.8		0.0745	-31.0646
1.5	2.93		0.075	-31.1897
1.51	2.32		0.0755	-30.8459
1.52	1.83		0.076	-31.3459
1.53	2.11		0.0765	-31.4709
1.54	3.28		0.077	-31.1897
1.55	4.01		0.0775	-31.5647
1.56	5.13		0.078	-31.3147
1.57	5.51		0.0785	-31.0334
1.58	5.38		0.079	-31.1897
1.59	6.06		0.0795	-31.0334
1.6	4.97		0.08	-31.1584
1.61	4.55		0.0805	-31.5959
1.62	4.93		0.081	-31.3772
1.63	3.44		0.0815	-31.5022
1.64	3.48		0.082	-31.4709
1.65	3.33		0.0825	-31.8459
1.66	2.55		0.083	-31.4709
1.67	2.54		0.0835	-31.3772
1.68	1.78		0.084	-31.8147
1.69	1.5		0.0845	-31.4397
1.7	1.65		0.085	-31.4397
1.71	2.17		0.0855	-31.5959
1.72	2.73		0.086	-31.2522
1.73	2.28		0.0865	-31.1897
1.74	1.84		0.087	-31.1584
1.75	1.84		0.0875	-31.2834
1.76	1.44		0.088	-31.9084
1.77	1.4		0.0885	-31.8772
1.78	1.78		0.089	-31.5959
1.79	0.6		0.0895	-31.6272
1.8	1.19		0.09	-31.5647
1.81	1.1		0.0905	-31.7834
1.82	0.76		0.091	-31.6584
1.83	1.29		0.0915	-31.6897
1.84	1.33		0.092	-31.4709
1.85	0.91		0.0925	-31.8459
1.86	1.32		0.093	-31.5647
1.87	0.82		0.0935	-31.8147
1.88	1.08		0.094	-31.8459
1.89	1.05		0.0945	-31.8772
1.9	0.88		0.095	-31.6272
1.91	0.31		0.0955	-31.5959
1.92	0.54		0.096	-31.8147
1.93	0.37		0.0965	-32.1272
1.94	1.18		0.097	-32.096
1.95	0.69		0.0975	-31.5959
1.96	1		0.098	-32.2835
1.97	-0.19		0.0985	-31.6897
1.98	0.59		0.099	-32.2835
1.99	0.24		0.0995	-31.8147
2	0.41		0.1	-31.8147
2.01	0.01		0.1005	-31.6897
2.02	-0.17		0.101	-32.1272
2.03	0.33		0.1015	-32.1272
2.04	0.3		0.102	-32.096
2.05	-0.46		0.1025	-32.1897
2.06	0.13		0.103	-32.2522
2.07	0.6		0.1035	-31.9397
2.08	0.69		0.104	-32.596
2.09	0.04		0.1045	-32.096
2.1	-0.46		0.105	-31.9397
2.11	0.27		0.1055	-32.0335
2.12	-0.04		0.106	-32.2522
2.13	0.26		0.1065	-32.3772
2.14	-0.3		0.107	-32.4085
2.15	0.1		0.1075	-32.3772
2.16	0.65		0.108	-32.1897
2.17	0.57		0.1085	-32.4397
2.18	-0.72		0.109	-32.7835
2.19	0.09		0.1095	-33.1898
2.2	0.24		0.11	-33.1898
2.21	0.24		0.1105	-32.1897
2.22	-0.45		0.111	-32.721
2.23	0.01		0.1115	-32.6272
2.24	-0.08		0.112	-32.346
2.25	-0.86		0.1125	-32.8148
2.26	-0.44		0.113	-32.7835
2.27	-0.27		0.1135	-32.471
2.28	0.19		0.114	-32.3147
2.29	-0.16		0.1145	-32.2835
2.3	-0.37		0.115	-32.5647
2.31	0.19		0.1155	-32.2522
2.32	-0.2		0.116	-32.6585
2.33	-0.35		0.1165	-32.6585
2.34	-0.36		0.117	-32.471
2.35	0.13		0.1175	-32.7523
2.36	0.77		0.118	-32.9398
2.37	0.47		0.1185	-33.6273
2.38	0.11		0.119	-32.9085
2.39	-0.07		0.1195	-32.5022
2.4	0.11		0.12	-32.5335
2.41	0.3		0.1205	-33.7211
2.42	0.33		0.121	-32.8148
2.43	0.56		0.1215	-33.2523
2.44	-0.02		0.122	-33.5023
2.45	-0.01		0.1225	-33.096
2.46	0.39		0.123	-32.9085
2.47	0.17		0.1235	-32.9398
2.48	0.62		0.124	-33.096
2.49	1.33		0.1245	-33.1898
2.5	1.98		0.125	-33.0023
2.51	0.99		0.1255	-33.346
2.52	1.06		0.126	-33.0023
2.53	1.09		0.1265	-33.4398
2.54	-0.02		0.127	-33.5023
2.55	-0.35		0.1275	-33.4086
2.56	-0.17		0.128	-32.9398
2.57	0.93		0.1285	-33.3773
2.58	0.44		0.129	-33.1273
2.59	0.09		0.1295	-32.8148
2.6	0.76		0.13	-32.971
2.61	0.76		0.1305	-33.3148
2.62	0.46		0.131	-33.1585
2.63	0.27		0.1315	-32.9398
2.64	-0.04		0.132	-33.1898
2.65	0.38		0.1325	-33.346
2.66	0.79		0.133	-32.971
2.67	1.34		0.1335	-33.1585
2.68	0.32		0.134	-33.1273
2.69	0.47		0.1345	-33.3773
2.7	0.32		0.135	-33.4086
2.71	-0.01		0.1355	-32.9398
2.72	0.66		0.136	-32.9398
2.73	0.18		0.1365	-33.5648
2.74	0.07		0.137	-33.5336
2.75	0.78		0.1375	-33.3148
2.76	-0.22		0.138	-33.9711
2.77	-0.34		0.1385	-32.5647
2.78	0.06		0.139	-33.096
2.79	0.04		0.1395	-33.1273
2.8	0.76		0.14	-33.3148
2.81	0.82		0.1405	-33.0335
2.82	0.31		0.141	-33.2835
2.83	0.95		0.1415	-33.8461
2.84	1.12		0.142	-32.8773
2.85	0.3		0.1425	-33.1585
2.86	0.41		0.143	-33.0335
2.87	0.56		0.1435	-33.0335
2.88	0.87		0.144	-33.0023
2.89	0.09		0.1445	-33.0648
2.9	0.68		0.145	-33.2835
2.91	0.99		0.1455	-33.0648
2.92	0.29		0.146	-33.0023
2.93	0.43		0.1465	-33.096
2.94	1.2		0.147	-33.4086
2.95	0.93		0.1475	-33.1585
2.96	0.06		0.148	-32.8773
2.97	0.51		0.1485	-32.971
2.98	0.71		0.149	-32.971
2.99	-0.22		0.1495	-33.1273
3	0.57		0.15	-33.4398
3.01	1.09		0.1505	-33.5336
3.02	1.22		0.151	-33.4086
3.03	-0.11		0.1515	-33.9086
3.04	0.65		0.152	-33.3773
3.05	0.91		0.1525	-33.7523
3.06	1.11		0.153	-33.1898
3.07	0.58		0.1535	-33.1273
3.08	0.6		0.154	-33.1585
3.09	0.1		0.1545	-33.1898
3.1	0.09		0.155	-33.2835
3.11	1.03		0.1555	-33.4086
3.12	0.27		0.156	-33.3773
3.13	0.59		0.1565	-32.8148
3.14	0.53		0.157	-33.6898
3.15	0.36		0.1575	-33.096
3.16	0.1		0.158	-33.7836
3.17	-0.15		0.1585	-33.5961
3.18	0.19		0.159	-33.1273
3.19	0.09		0.1595	-33.8148
3.2	0.76		0.16	-33.9086
3.21	0.71		0.1605	-33.5648
3.22	0.32		0.161	-33.5023
3.23	0.46		0.1615	-33.3773
3.24	0.11		0.162	-33.5023
3.25	0.23		0.1625	-33.3148
3.26	0.2		0.163	-33.9711
3.27	-0.13		0.1635	-33.6898
3.28	0.1		0.164	-33.6273
3.29	0		0.1645	-33.3773
3.3	-0.04		0.165	-33.4711
3.31	-0.3		0.1655	-33.6586
3.32	0.53		0.166	-33.1898
3.33	0.69		0.1665	-33.3773
3.34	0.13		0.167	-33.5023
3.35	-0.39		0.1675	-33.1585
3.36	0.93		0.168	-33.4398
3.37	-0.16		0.1685	-33.8461
3.38	0.17		0.169	-33.6273
3.39	-0.01		0.1695	-33.3773
3.4	0.14		0.17	-33.3773
3.41	0.28		0.1705	-33.8461
3.42	0.41		0.171	-33.6273
3.43	0.31		0.1715	-33.346
3.44	-0.15		0.172	-33.5023
3.45	-0.45		0.1725	-33.1898
3.46	0.63		0.173	-33.1898
3.47	0.31		0.1735	-33.6586
3.48	0.27		0.174	-33.6586
3.49	0.17		0.1745	-34.0023
3.5	-0.17		0.175	-33.1898
3.51	-0.31		0.1755	-33.5961
3.52	0.27		0.176	-33.4711
3.53	-0.33		0.1765	-33.5023
3.54	0.26		0.177	-33.7211
3.55	0.32		0.1775	-33.5023
3.56	0.02		0.178	-33.6898
3.57	0.3		0.1785	-33.6273
3.58	-0.32		0.179	-34.0336
3.59	0.31		0.1795	-33.7523
3.6	0.45		0.18	-32.6898
3.61	0.24		0.1805	-33.3148
3.62	0.33		0.181	-32.9398
3.63	0.34		0.1815	-33.3148
3.64	0.41		0.182	-33.1273
3.65	0.22		0.1825	-33.5961
3.66	-0.25		0.183	-32.9398
3.67	-0.13		0.1835	-33.3773
3.68	0.37		0.184	-33.0335
3.69	-0.33		0.1845	-33.1898
3.7	-0.14		0.185	-33.6586
3.71	-0.48		0.1855	-33.5961
3.72	0.28		0.186	-33.7836
3.73	0.59		0.1865	-33.2835
3.74	0.94		0.187	-33.4086
3.75	1.32		0.1875	-33.4711
3.76	0.69		0.188	-33.346
3.77	1.14		0.1885	-33.5648
3.78	0.38		0.189	-33.0023
3.79	0.95		0.1895	-33.3148
3.8	-0.34		0.19	-33.4398
3.81	1.01		0.1905	-33.9711
3.82	-0.23		0.191	-33.7836
3.83	0.65		0.1915	-33.7523
3.84	0.53		0.192	-33.7836
3.85	0.26		0.1925	-33.1273
3.86	0.59		0.193	-33.3773
3.87	0.27		0.1935	-33.346
3.88	0.03		0.194	-33.5336
3.89	0.39		0.1945	-33.7836
3.9	0.76		0.195	-33.4711
3.91	-0.06		0.1955	-33.6898
3.92	0.73		0.196	-33.0335
3.93	0.23		0.1965	-33.4711
3.94	0.68		0.197	-33.346
3.95	0.29		0.1975	-33.5961
3.96	0.61		0.198	-33.5648
3.97	0.16		0.1985	-33.5961
3.98	-0.27		0.199	-33.4086
3.99	-0.32		0.1995	-33.2523
4	0		0.2	-33.6898
4.01	0.47		0.2005	-32.971
4.02	0.19		0.201	-33.1585
4.03	0.82		0.2015	-33.7523
4.04	0.7		0.202	-33.4711
4.05	0.67		0.2025	-33.9398
4.06	0.22		0.203	-34.2524
4.07	0.73		0.2035	-33.7836
4.08	0.53		0.204	-33.9086
4.09	-0.89		0.2045	-33.8148
4.1	-0.38		0.205	-33.5023
4.11	0.04		0.2055	-34.5336
4.12	-0.13		0.206	-33.1898
4.13	-0.08		0.2065	-33.7523
4.14	-0.15		0.207	-33.9398
4.15	0.15		0.2075	-33.7836
4.16	0.26		0.208	-33.9711
4.17	0.52		0.2085	-33.6898
4.18	0.22		0.209	-33.8148
4.19	0.8		0.2095	-34.1899
4.2	0.23		0.21	-33.5648
4.21	0.35		0.2105	-34.0023
4.22	0.1		0.211	-33.9398
4.23	0.05		0.2115	-33.8773
4.24	0.51		0.212	-33.5648
4.25	0.64		0.2125	-33.9398
4.26	0.08		0.213	-33.7211
4.27	0.02		0.2135	-33.9711
4.28	-0.21		0.214	-34.1586
4.29	0.14		0.2145	-33.5648
4.3	0.42		0.215	-33.6586
4.31	-0.23		0.2155	-33.346
4.32	-0.39		0.216	-33.9711
4.33	-0.1		0.2165	-33.6273
4.34	0.28		0.217	-34.3149
4.35	0.4		0.2175	-33.4398
4.36	0.48		0.218	-33.8461
4.37	0.38		0.2185	-33.5023
4.38	0.01		0.219	-33.5648
4.39	1.02		0.2195	-33.8461
4.4	0.12		0.22	-33.9086
4.41	-0.16		0.2205	-33.6273
4.42	-0.16		0.221	-33.6586
4.43	0.27		0.2215	-34.0023
4.44	-0.23		0.222	-33.5648
4.45	0.03		0.2225	-34.3149
4.46	0.08		0.223	-33.9398
4.47	0.07		0.2235	-33.7836
4.48	0.03		0.224	-34.3149
4.49	0.07		0.2245	-33.8773
4.5	0.63		0.225	-34.0023
4.51	1.03		0.2255	-33.1273
4.52	0.6		0.226	-33.4086
4.53	0.19		0.2265	-33.2835
4.54	-0.34		0.227	-33.6898
4.55	-0.48		0.2275	-33.6273
4.56	0.23		0.228	-33.7836
4.57	0.03		0.2285	-33.4711
4.58	0.15		0.229	-33.3148
4.59	0.12		0.2295	-33.8148
4.6	0.81		0.23	-34.0648
4.61	0.6		0.2305	-33.8773
4.62	0.58		0.231	-34.0648
4.63	0.59		0.2315	-33.7523
4.64	0.42		0.232	-33.7211
4.65	0.45		0.2325	-33.8461
4.66	0.75		0.233	-33.8148
4.67	-0.13		0.2335	-33.8773
4.68	0.42		0.234	-33.6273
4.69	-0.05		0.2345	-33.5648
4.7	0.07		0.235	-33.8461
4.71	0.31		0.2355	-33.8773
4.72	0.11		0.236	-34.0961
4.73	0.05		0.2365	-34.0961
4.74	0.29		0.237	-33.6586
4.75	0.01		0.2375	-34.1899
4.76	-0.39		0.238	-33.8773
4.77	0.34		0.2385	-33.8461
4.78	0.28		0.239	-34.0648
4.79	-0.53		0.2395	-34.0336
4.8	-0.58		0.24	-33.9086
4.81	0.34		0.2405	-33.8461
4.82	-0.59		0.241	-33.4398
4.83	1.2		0.2415	-34.0023
4.84	0.3		0.242	-33.6898
4.85	0.85		0.2425	-34.0648
4.86	-0.07		0.243	-33.9086
4.87	-0.01		0.2435	-34.6899
4.88	-0.51		0.244	-34.3149
4.89	0.08		0.2445	-33.9398
4.9	0.38		0.245	-33.9398
4.91	-0.52		0.2455	-33.8148
4.92	0.14		0.246	-33.5648
4.93	-0.37		0.2465	-34.1274
4.94	0.34		0.247	-34.1899
4.95	0.18		0.2475	-33.7211
4.96	0.34		0.248	-34.0336
4.97	0.17		0.2485	-33.8461
4.98	-0.23		0.249	-33.9711
4.99	-0.99		0.2495	-34.2836
5	0.27		0.25	-34.1899
5.01	-0.2		0.2505	-33.8148
5.02	-0.6		0.251	-33.8148
5.03	-0.72		0.2515	-33.4711
5.04	-0.54		0.252	-34.0336
5.05	-0.35		0.2525	-33.1898
5.06	-0.53		0.253	-33.7523
5.07	-0.43		0.2535	-33.9398
5.08	-0.44		0.254	-33.6898
5.09	-1.01		0.2545	-33.7211
5.1	-0.19		0.255	-33.2523
5.11	0.24		0.2555	-33.4398
5.12	0.02		0.256	-33.1898
5.13	-0.18		0.2565	-33.4398
5.14	-0.57		0.257	-33.4711
5.15	-1.1		0.2575	-33.8461
5.16	-0.07		0.258	-33.2523
5.17	0.46		0.2585	-33.6898
5.18	-0.19		0.259	-33.7523
5.19	0.14		0.2595	-33.5336
5.2	-0.02		0.26	-34.0336
5.21	-0.49		0.2605	-33.8461
5.22	-0.47		0.261	-34.0023
5.23	-0.04		0.2615	-34.1899
5.24	-0.9		0.262	-33.8773
5.25	-0.02		0.2625	-34.1586
5.26	-0.81		0.263	-34.3461
5.27	-0.23		0.2635	-33.5336
5.28	0.66		0.264	-33.4398
5.29	-0.19		0.2645	-34.4399
5.3	-0.26		0.265	-33.9711
5.31	-0.34		0.2655	-33.7836
5.32	0.06		0.266	-33.9398
5.33	0.75		0.2665	-34.1899
5.34	-0.01		0.267	-33.8461
5.35	0.37		0.2675	-34.2524
5.36	-0.01		0.268	-33.8148
5.37	-0.2		0.2685	-33.9086
5.38	-0.28		0.269	-34.0023
5.39	0.72		0.2695	-34.0961
5.4	-0.17		0.27	-33.7523
5.41	0.32		0.2705	-34.1274
5.42	0.75		0.271	-33.6898
5.43	0.46		0.2715	-34.0336
5.44	0.52		0.272	-33.8773
5.45	0.26		0.2725	-34.0961
5.46	0.42		0.273	-34.3461
5.47	0.31		0.2735	-33.9398
5.48	-0.23		0.274	-34.1899
5.49	0.14		0.2745	-33.7836
5.5	-0.66		0.275	-33.9086
5.51	-0.35		0.2755	-33.5336
5.52	0.67		0.276	-33.8773
5.53	-0.51		0.2765	-33.5961
5.54	-0.47		0.277	-34.0023
5.55	0.91		0.2775	-33.5648
5.56	-0.04		0.278	-34.0023
5.57	-0.09		0.2785	-33.8773
5.58	0.1		0.279	-34.4086
5.59	0.46		0.2795	-34.1586
5.6	-0.11		0.28	-33.7523
5.61	-0.21		0.2805	-33.8148
5.62	0.61		0.281	-33.9086
5.63	0.29		0.2815	-34.5649
5.64	0.7		0.282	-33.8148
5.65	0.51		0.2825	-33.7836
5.66	-0.14		0.283	-33.5961
5.67	0.48		0.2835	-33.7836
5.68	0.19		0.284	-34.0023
5.69	-0.23		0.2845	-34.1899
5.7	-0.24		0.285	-33.5648
5.71	-0.26		0.2855	-34.1274
5.72	0.28		0.286	-33.8773
5.73	0.38		0.2865	-33.9711
5.74	1.23		0.287	-33.8773
5.75	0.36		0.2875	-33.5336
5.76	0.7		0.288	-34.1899
5.77	0.27		0.2885	-34.0648
5.78	0.96		0.289	-34.0023
5.79	0.22		0.2895	-34.1586
5.8	0.46		0.29	-34.4086
5.81	0.67		0.2905	-33.9711
5.82	0.48		0.291	-34.0648
5.83	0.25		0.2915	-33.8773
5.84	0.16		0.292	-34.0648
5.85	0.32		0.2925	-33.8148
5.86	0.25		0.293	-34.1899
5.87	-0.59		0.2935	-33.8461
5.88	0.22		0.294	-34.0023
5.89	0.38		0.2945	-33.5648
5.9	0.75		0.295	-33.8148
5.91	0.7		0.2955	-33.5336
5.92	-0.12		0.296	-33.6898
5.93	0.33		0.2965	-33.9398
5.94	-0.15		0.297	-33.6898
5.95	-0.05		0.2975	-33.9086
5.95	0.55		0.298	-33.7836
5.96	0.19		0.2985	-34.4399
5.97	0.52		0.299	-34.3149
5.98	0.07		0.2995	-33.9398
5.99	0.63		0.3	-33.8461
6	0.65		0.3005	-33.7523
6.01	0.31		0.301	-34.0961
6.02	-0.07		0.3015	-33.8773
6.03	0.41		0.302	-33.8461
6.04	-0.3		0.3025	-34.2524
6.05	0.87		0.303	-33.9086
6.06	0.43		0.3035	-33.6898
6.07	-0.04		0.304	-34.0961
6.08	0.09		0.3045	-33.1898
6.09	1.28		0.305	-34.1274
6.1	0.31		0.3055	-33.4398
6.11	0.61		0.306	-33.4398
6.12	-0.07		0.3065	-33.7836
6.13	0.7		0.307	-33.6273
6.14	1.38		0.3075	-33.9086
6.15	0.84		0.308	-33.6898
6.16	0.04		0.3085	-33.8148
6.17	-0.19		0.309	-33.8148
6.18	0.18		0.3095	-33.7523
6.19	0.52		0.31	-33.7523
6.2	0.14		0.3105	-33.7523
6.21	0.25		0.311	-33.9086
6.22	1.3		0.3115	-33.7211
6.23	0.59		0.312	-33.7836
6.24	0.26		0.3125	-33.8773
6.25	0.14		0.313	-33.6273
6.26	-0.05		0.3135	-34.0336
6.27	0.01		0.314	-33.9086
6.28	0.39		0.3145	-34.0648
6.29	-0.8		0.315	-33.8461
6.3	0.13		0.3155	-34.0023
6.31	0.35		0.316	-34.0023
6.32	-0.08		0.3165	-33.7836
6.33	0.08		0.317	-33.6898
6.34	0.09		0.3175	-34.2524
6.35	-0.07		0.318	-33.5336
6.36	0.11		0.3185	-34.0336
6.37	-0.46		0.319	-33.8461
6.38	-0.06		0.3195	-33.9711
6.39	-0.1		0.32	-33.3148
6.4	0.48		0.3205	-33.9398
6.41	-0.02		0.321	-33.4398
6.42	-0.22		0.3215	-34.0648
6.43	0.07		0.322	-34.1586
6.44	0.08		0.3225	-33.1898
6.45	-0.68		0.323	-33.6273
6.46	0.41		0.3235	-33.6586
6.47	0.33		0.324	-34.0961
6.48	0.68		0.3245	-33.8773
6.49	0.5		0.325	-33.9398
6.5	-0.05		0.3255	-33.5648
6.51	0.34		0.326	-33.7211
6.52	-0.19		0.3265	-33.8148
6.53	-0.12		0.327	-34.0648
6.54	1.28		0.3275	-33.9086
6.55	-0.21		0.328	-33.7836
6.56	0.58		0.3285	-33.9711
6.57	0.3		0.329	-33.5648
6.58	-0.5		0.3295	-34.0336
6.59	-0.32		0.33	-34.1899
6.6	0.48		0.3305	-33.8461
6.61	-0.2		0.331	-33.8148
6.62	-0.33		0.3315	-33.4711
6.63	0.12		0.332	-33.5023
6.64	0.39		0.3325	-33.6898
6.65	0.06		0.333	-34.0023
6.66	0.32		0.3335	-34.3774
6.67	0.59		0.334	-34.0648
6.68	-0.11		0.3345	-34.0023
6.69	-0.06		0.335	-34.1899
6.7	-0.26		0.3355	-34.4086
6.71	0.21		0.336	-34.1274
6.72	0.33		0.3365	-34.0961
6.73	-0.07		0.337	-34.4086
6.74	-0.15		0.3375	-33.8461
6.75	-0.15		0.338	-34.3149
6.76	-0.28		0.3385	-34.2836
6.77	0.19		0.339	-33.9398
6.78	0.25		0.3395	-34.0961
6.79	-0.11		0.34	-34.0648
6.8	0.1		0.3405	-34.4399
6.81	-0.23		0.341	-34.0648
6.82	0.64		0.3415	-34.1899
6.83	-0.14		0.342	-34.4399
6.84	0.1		0.3425	-33.7836
6.85	-0.34		0.343	-33.3773
6.86	0.59		0.3435	-34.0648
6.87	-0.16		0.344	-34.0648
6.88	-0.14		0.3445	-34.0961
6.89	0.61		0.345	-33.6898
6.9	0.07		0.3455	-34.0023
6.91	0.29		0.346	-33.9711
6.92	0.4		0.3465	-33.9086
6.93	0.34		0.347	-34.0648
6.94	0.46		0.3475	-33.9711
6.95	0.33		0.348	-33.5648
6.96	0.21		0.3485	-33.4711
6.97	0.56		0.349	-33.7836
6.98	0.21		0.3495	-33.8148
6.99	-0.17		0.35	-34.0648
7	-0.54		0.3505	-33.6898
7.01	0.58		0.351	-33.8773
7.02	0.48		0.3515	-33.8461
7.03	0.23		0.352	-34.3149
7.04	0.24		0.3525	-34.0961
7.05	-0.11		0.353	-34.4399
7.06	0.09		0.3535	-34.1274
7.07	0.33		0.354	-34.6586
7.08	0.39		0.3545	-34.0336
7.09	0.65		0.355	-34.2836
7.1	0.33		0.3555	-33.7523
7.11	-0.03		0.356	-34.4086
7.12	0.64		0.3565	-33.9086
7.13	-0.09		0.357	-33.7523
7.14	0.78		0.3575	-34.6274
7.15	-0.01		0.358	-34.0961
7.16	0.29		0.3585	-34.5961
7.17	-0.09		0.359	-34.1899
7.18	-0.07		0.3595	-33.8773
7.19	-0.15		0.36	-34.1899
7.2	0.38		0.3605	-34.4086
7.21	0.03		0.361	-33.8773
7.22	-0.44		0.3615	-34.3774
7.23	0.27		0.362	-34.3149
7.24	0.19		0.3625	-34.5024
7.25	0.09		0.363	-33.9086
7.26	0.17		0.3635	-34.1899
7.27	0.71		0.364	-34.0648
7.28	-0.23		0.3645	-34.3149
7.29	-0.38		0.365	-34.7212
7.3	0.73		0.3655	-34.1274
7.31	-0.1		0.366	-34.0961
7.32	0.42		0.3665	-34.8149
7.33	0.14		0.367	-33.7836
7.34	0.19		0.3675	-33.8773
7.35	0.77		0.368	-34.1274
7.36	0.68		0.3685	-34.7837
7.37	0.45		0.369	-34.0023
7.38	0.35		0.3695	-34.0336
7.39	-0.57		0.37	-34.4399
7.4	0.31		0.3705	-33.9711
7.41	0.04		0.371	-34.0023
7.42	0.38		0.3715	-34.0023
7.43	-0.28		0.372	-33.7523
7.44	0.3		0.3725	-33.6898
7.45	-0.1		0.373	-33.9711
7.46	-0.09		0.3735	-34.1274
7.47	-0.12		0.374	-33.9398
7.48	-0.01		0.3745	-34.4711
7.49	-0.46		0.375	-33.1898
7.5	-0.67		0.3755	-33.9711
7.51	0.33		0.376	-33.5336
7.52	0.26		0.3765	-34.2211
7.53	0.4		0.377	-33.4711
7.54	0.29		0.3775	-34.0023
7.55	0.31		0.378	-33.7836
7.56	0.25		0.3785	-34.2836
7.57	0.58		0.379	-33.9711
7.58	-0.2		0.3795	-33.8773
7.59	0.28		0.38	-33.6273
7.6	-0.1		0.3805	-33.5336
7.61	0.46		0.381	-33.4086
7.62	-0.42		0.3815	-33.4711
7.63	0.32		0.382	-33.7836
7.64	0.71		0.3825	-33.5961
7.65	-0.4		0.383	-33.7523
7.66	0.52		0.3835	-33.9398
7.67	0.88		0.384	-33.6898
7.68	0.29		0.3845	-33.4711
7.69	0.72		0.385	-34.2836
7.7	0.49		0.3855	-33.9711
7.71	0.13		0.386	-34.4399
7.72	0.84		0.3865	-33.6273
7.73	1.34		0.387	-33.6273
7.74	0.62		0.3875	-33.7523
7.75	0.56		0.388	-33.346
7.76	0.5		0.3885	-33.7523
7.77	1.35		0.389	-34.0961
7.78	0.26		0.3895	-33.5336
7.79	0.29		0.39	-33.8773
7.8	0.01		0.3905	-33.8148
7.81	0.88		0.391	-33.8461
7.82	0.62		0.3915	-33.9398
7.83	0.41		0.392	-33.6273
7.84	0.35		0.3925	-34.1586
7.85	0.59		0.393	-33.7523
7.86	0.63		0.3935	-33.9711
7.87	0.33		0.394	-33.8148
7.88	1		0.3945	-33.8461
7.89	1.07		0.395	-34.1586
7.9	0.3		0.3955	-33.6586
7.91	-0.01		0.396	-33.8148
7.92	0.67		0.3965	-33.8148
7.93	-0.05		0.397	-33.346
7.94	0.66		0.3975	-34.3149
7.95	0.54		0.398	-33.8461
7.96	0.36		0.3985	-33.5961
7.97	-0.21		0.399	-33.4086
7.98	0.53		0.3995	-33.4086
7.99	1.09		0.4	-33.2835
8	-0.15		0.4005	-33.6273
8.01	0.24		0.401	-33.1898
8.02	0.35		0.4015	-33.4711
8.03	0.51		0.402	-33.5961
8.04	0		0.4025	-33.4086
8.05	0.25		0.403	-33.8461
8.06	0.59		0.4035	-33.9086
8.07	0.3		0.404	-34.0648
8.08	0		0.4045	-33.6898
8.09	0.78		0.405	-33.9711
8.1	0.46		0.4055	-33.6273
8.11	0.65		0.406	-33.5961
8.12	0.28		0.4065	-33.9398
8.13	0.71		0.407	-33.9086
8.14	0.82		0.4075	-33.8773
8.15	0.19		0.408	-33.9086
8.16	0.5		0.4085	-33.8773
8.17	0.19		0.409	-34.0336
8.18	0.77		0.4095	-33.1273
8.19	0.39		0.41	-33.5961
8.2	0.47		0.4105	-34.5336
8.21	0.28		0.411	-33.1898
8.22	0.85		0.4115	-33.9711
8.23	0.54		0.412	-34.0336
8.24	0.48		0.4125	-33.4711
8.25	-0.17		0.413	-33.9398
8.26	-0.06		0.4135	-34.3149
8.27	0.48		0.414	-33.4086
8.28	0.28		0.4145	-33.5648
8.29	0.22		0.415	-33.6586
8.3	0.9		0.4155	-33.8148
8.31	0.54		0.416	-34.1274
8.32	-0.19		0.4165	-33.6273
8.33	0.73		0.417	-33.9086
8.34	0.17		0.4175	-33.3773
8.35	1.21		0.418	-33.6586
8.36	0.56		0.4185	-34.2836
8.37	0.17		0.419	-33.9086
8.38	0.15		0.4195	-33.3773
8.39	0.09		0.42	-33.7523
8.4	0.07		0.4205	-33.096
8.41	0.72		0.421	-33.1585
8.42	0.94		0.4215	-33.5648
8.43	0.52		0.422	-33.096
8.44	0.75		0.4225	-33.1585
8.45	0.37		0.423	-34.0023
8.46	0.93		0.4235	-33.6898
8.47	0.2		0.424	-33.5648
8.48	0.73		0.4245	-33.8773
8.49	0.69		0.425	-33.8148
8.5	1.68		0.4255	-33.6898
8.51	1.74		0.426	-33.346
8.52	1.5		0.4265	-33.6898
8.53	0.58		0.427	-33.2835
8.54	1.18		0.4275	-34.1586
8.55	0.72		0.428	-33.6898
8.56	0.65		0.4285	-34.0023
8.57	1.21		0.429	-33.6273
8.58	0.82		0.4295	-33.9711
8.59	0.65		0.43	-34.0961
8.6	0.82		0.4305	-33.7836
8.61	0.8		0.431	-33.6273
8.62	0.24		0.4315	-33.8148
8.63	0.49		0.432	-33.5648
8.64	0.09		0.4325	-33.3148
8.65	-0.05		0.433	-33.9086
8.66	0.75		0.4335	-33.7836
8.67	0.39		0.434	-33.6898
8.68	0.17		0.4345	-34.1899
8.69	0.68		0.435	-34.2211
8.7	0.13		0.4355	-33.5023
8.71	0.33		0.436	-34.3149
8.72	-0.02		0.4365	-33.9398
8.73	0.35		0.437	-33.5961
8.74	0.36		0.4375	-33.346
8.75	-0.23		0.438	-33.7836
8.76	-0.19		0.4385	-33.9086
8.77	0.06		0.439	-34.5649
8.78	-0.02		0.4395	-33.9398
8.79	-0.23		0.44	-34.1899
8.8	0.4		0.4405	-33.5023
8.81	0.35		0.441	-33.5336
8.82	0.27		0.4415	-33.6273
8.83	-0.23		0.442	-33.8773
8.84	0.84		0.4425	-33.5648
8.85	0.52		0.443	-33.9398
8.86	-0.66		0.4435	-33.5023
8.87	0.08		0.444	-34.1899
8.88	-0.28		0.4445	-33.7836
8.89	-0.22		0.445	-33.6273
8.9	-0.04		0.4455	-34.1274
8.91	-0.28		0.446	-34.0023
8.92	-0.14		0.4465	-34.0336
8.93	-0.28		0.447	-33.346
8.94	-0.46		0.4475	-33.9711
8.95	0.27		0.448	-34.0023
8.96	0.26		0.4485	-34.4399
8.97	-0.6		0.449	-33.5961
8.98	0.51		0.4495	-33.9086
8.99	0.38		0.45	-34.0023
9	0.23		0.4505	-33.6586
9.01	-0.29		0.451	-34.3149
9.02	0.31		0.4515	-34.1899
9.03	0.25		0.452	-34.4086
9.04	-0.44		0.4525	-34.1899
9.05	-0.34		0.453	-33.8148
9.06	-0.41		0.4535	-34.5961
9.07	0.33		0.454	-34.0961
9.08	-0.07		0.4545	-34.0961
9.09	-0.17		0.455	-34.3149
9.1	0.75		0.4555	-33.8148
9.11	-0.54		0.456	-34.1274
9.12	-0.21		0.4565	-33.8773
9.13	-0.13		0.457	-34.0961
9.14	0.31		0.4575	-33.8773
9.15	-0.43		0.458	-34.0961
9.16	0.12		0.4585	-34.0648
9.17	0.5		0.459	-34.0336
9.18	-0.75		0.4595	-33.8148
9.19	-0.21		0.46	-33.9711
9.2	0.24		0.4605	-34.1274
9.21	-0.13		0.461	-34.2836
9.22	-0.24		0.4615	-33.6898
9.23	-0.32		0.462	-34.3149
9.24	0.4		0.4625	-34.0023
9.25	-0.65		0.463	-33.8773
9.26	-0.38		0.4635	-34.9712
9.27	-0.23		0.464	-34.0961
9.28	-0.72		0.4645	-33.8148
9.29	0.79		0.465	-34.5024
9.3	-0.14		0.4655	-34.0648
9.31	0.03		0.466	-33.9711
9.32	0.19		0.4665	-34.4086
9.33	0.7		0.467	-34.1274
9.34	0.18		0.4675	-34.1586
9.35	0.19		0.468	-34.0336
9.36	0.2		0.4685	-33.8461
9.37	0.24		0.469	-33.9398
9.38	-0.12		0.4695	-33.6898
9.39	-0.04		0.47	-33.8773
9.4	0.7		0.4705	-34.1899
9.41	0.63		0.471	-33.7523
9.42	0.19		0.4715	-33.6586
9.43	0.61		0.472	-34.4399
9.44	0.33		0.4725	-34.0336
9.45	-0.26		0.473	-34.1899
9.46	0.03		0.4735	-33.9086
9.47	0.28		0.474	-34.1274
9.48	-0.24		0.4745	-33.8773
9.49	0.33		0.475	-33.7211
9.5	0.37		0.4755	-33.6898
9.51	0.19		0.476	-33.8461
9.52	0.67		0.4765	-33.7211
9.53	-1.09		0.477	-33.8461
9.54	-0.37		0.4775	-33.7836
9.55	0.15		0.478	-33.5961
9.56	0.01		0.4785	-34.3461
9.57	0.19		0.479	-33.7836
9.58	-0.2		0.4795	-33.9398
9.59	0.74		0.48	-33.9398
9.6	-0.08		0.4805	-33.9086
9.61	-0.62		0.481	-33.2835
9.62	-0.14		0.4815	-34.0648
9.63	-0.03		0.482	-33.1898
9.64	0.15		0.4825	-33.6273
9.65	0.52		0.483	-33.6898
9.66	-0.79		0.4835	-33.8773
9.67	0.14		0.484	-33.7836
9.68	-0.23		0.4845	-33.9711
9.69	-0.9		0.485	-34.3774
9.7	0.3		0.4855	-33.7836
9.71	0.03		0.486	-34.0648
9.72	-0.16		0.4865	-33.2835
9.73	0.42		0.487	-33.7523
9.74	0.24		0.4875	-33.6898
9.75	0.61		0.488	-33.9711
9.76	0.28		0.4885	-33.9398
9.77	1.08		0.489	-33.5336
9.78	0.34		0.4895	-33.2835
9.79	-0.5		0.49	-34.1274
9.8	0.43		0.4905	-33.9398
9.81	0.38		0.491	-34.3774
9.82	0.33		0.4915	-34.4086
9.83	0.33		0.492	-33.6586
9.84	-0.03		0.4925	-33.8148
9.85	0.01		0.493	-33.8148
9.86	1.28		0.4935	-33.5023
9.87	1.04		0.494	-33.6273
9.88	0.39		0.4945	-34.0336
9.89	0.4		0.495	-33.8461
9.9	0.68		0.4955	-33.4711
9.91	0.89		0.496	-34.0023
9.92	0.29		0.4965	-33.9086
9.93	1.59		0.497	-33.4398
9.94	0.79		0.4975	-33.4398
9.95	1		0.498	-33.9398
9.96	0.58		0.4985	-33.5023
9.97	-0.04		0.499	-33.346
9.98	0.27		0.4995	-33.1898
9.99	1.25		0.5	-33.2835
10	0.78		0.5005	-33.5648
10.01	0.48		0.501	-33.8461
10.02	0.85		0.5015	-33.5336
10.03	0.06		0.502	-33.346
10.04	0.77		0.5025	-32.971
10.05	0.84		0.503	-33.0023
10.06	1.2		0.5035	-33.3148
10.07	0.5		0.504	-33.5023
10.08	1.73		0.5045	-33.5961
10.09	0.61		0.505	-33.4398
10.1	0.58		0.5055	-33.5023
10.11	1.67		0.506	-33.4086
10.12	1.32		0.5065	-33.5336
10.13	1.41		0.507	-33.4711
10.14	1.47		0.5075	-33.6586
10.15	1.6		0.508	-32.971
10.16	0.88		0.5085	-33.346
10.17	0.82		0.509	-33.1273
10.18	1.04		0.5095	-33.8148
10.19	1.23		0.51	-33.5648
10.2	0.63		0.5105	-33.5023
10.21	1.67		0.511	-33.7211
10.22	0.6		0.5115	-33.6586
10.23	0.61		0.512	-33.6586
10.24	1.39		0.5125	-33.3148
10.25	1.07		0.513	-33.5336
10.26	0.46		0.5135	-33.2835
10.27	0.88		0.514	-33.5336
10.28	0.76		0.5145	-33.4086
10.29	1.18		0.515	-33.0023
10.3	0.16		0.5155	-33.4398
10.31	0.08		0.516	-33.6273
10.32	1.6		0.5165	-33.6898
10.33	-0.14		0.517	-33.6898
10.34	0.79		0.5175	-34.1586
10.35	0.69		0.518	-33.7523
10.36	0.76		0.5185	-33.7836
10.37	-0.1		0.519	-33.9711
10.38	0.38		0.5195	-33.8148
10.39	0.37		0.52	-34.0648
10.4	0.41		0.5205	-33.096
10.41	0.66		0.521	-33.6898
10.42	0.79		0.5215	-33.7523
10.43	0.1		0.522	-33.6898
10.44	0.43		0.5225	-33.9711
10.45	-0.02		0.523	-33.4086
10.46	1.37		0.5235	-33.8461
10.47	-0.21		0.524	-33.5648
10.48	0.38		0.5245	-33.4086
10.49	0.64		0.525	-33.5336
10.5	0.27		0.5255	-33.4086
10.51	0.19		0.526	-33.8773
10.52	-0.16		0.5265	-33.5961
10.53	-0.03		0.527	-33.4086
10.54	-0.04		0.5275	-33.3148
10.55	0.33		0.528	-33.5023
10.56	1.29		0.5285	-33.6898
10.57	1.11		0.529	-33.346
10.58	0.25		0.5295	-34.0648
10.59	0.67		0.53	-33.346
10.6	0.28		0.5305	-34.0023
10.61	0.52		0.531	-33.9086
10.62	0.98		0.5315	-33.4086
10.63	0.63		0.532	-33.4711
10.64	1.02		0.5325	-33.5023
10.65	0.95		0.533	-33.4086
10.66	0.24		0.5335	-33.2835
10.67	0.1		0.534	-33.5336
10.68	0.79		0.5345	-33.1898
10.69	0.38		0.535	-33.8461
10.7	0.17		0.5355	-33.1898
10.71	0.25		0.536	-33.5648
10.72	-0.66		0.5365	-33.2835
10.73	0.45		0.537	-33.4398
10.74	0.04		0.5375	-32.9398
10.75	0.34		0.538	-33.5336
10.76	0.28		0.5385	-33.5023
10.77	0.34		0.539	-33.221
10.78	-0.3		0.5395	-33.4711
10.79	-0.16		0.54	-32.9398
10.8	0.84		0.5405	-33.6273
10.81	0.57		0.541	-32.8148
10.82	0.42		0.5415	-33.6273
10.83	0.63		0.542	-33.8461
10.84	1.02		0.5425	-33.5648
10.85	1.06		0.543	-33.5023
10.86	0.55		0.5435	-33.7836
10.87	0.66		0.544	-33.9711
10.88	0.43		0.5445	-33.8461
10.89	0.7		0.545	-33.8461
10.9	0.38		0.5455	-33.6586
10.91	0.39		0.546	-33.4711
10.92	0.2		0.5465	-33.4711
10.93	0.46		0.547	-34.0336
10.94	0.5		0.5475	-33.6586
10.95	0.69		0.548	-33.6586
10.96	0.22		0.5485	-33.346
10.97	-0.1		0.549	-33.5961
10.98	0.92		0.5495	-33.1898
10.99	0.98		0.55	-33.5961
11	0.98		0.5505	-34.1586
11.01	1.39		0.551	-33.9398
11.02	1.11		0.5515	-33.6898
11.03	1.38		0.552	-34.2836
11.04	1.11		0.5525	-33.7523
11.05	0.9		0.553	-33.346
11.06	0.83		0.5535	-33.6898
11.07	1.29		0.554	-33.8773
11.08	0.95		0.5545	-33.4398
11.09	2.48		0.555	-33.9086
11.1	1.24		0.5555	-33.6586
11.11	1.02		0.556	-33.5336
11.12	1.24		0.5565	-33.8148
11.13	0.68		0.557	-33.8461
11.14	0.91		0.5575	-33.5336
11.15	1.44		0.558	-34.0961
11.16	0.48		0.5585	-33.9086
11.17	1.24		0.559	-34.0648
11.18	0.82		0.5595	-33.6586
11.19	0.19		0.56	-34.0961
11.2	0.47		0.5605	-34.1274
11.21	0.59		0.561	-34.0961
11.22	0.97		0.5615	-34.0961
11.23	0.71		0.562	-33.6273
11.24	-0.31		0.5625	-33.8773
11.25	1.11		0.563	-33.7523
11.26	0.97		0.5635	-34.5024
11.27	1.39		0.564	-33.4711
11.28	1.15		0.5645	-33.8148
11.29	1.24		0.565	-33.1898
11.3	1.08		0.5655	-33.7523
11.31	1.66		0.566	-33.5023
11.32	1.11		0.5665	-33.8148
11.33	0.79		0.567	-33.5336
11.34	0.46		0.5675	-33.3148
11.35	0.66		0.568	-33.6273
11.36	0.06		0.5685	-33.7211
11.37	0.01		0.569	-33.3773
11.38	0.99		0.5695	-33.3148
11.39	0.91		0.57	-33.5023
11.4	1.21		0.5705	-33.6586
11.41	0.72		0.571	-33.2835
11.42	0.68		0.5715	-33.4086
11.43	0.12		0.572	-32.9085
11.44	1.13		0.5725	-33.9711
11.45	0.44		0.573	-33.5961
11.46	1.1		0.5735	-33.0648
11.47	1.69		0.574	-33.4711
11.48	0.7		0.5745	-33.346
11.49	0.85		0.575	-33.8148
11.5	0.35		0.5755	-33.9086
11.51	1.29		0.576	-33.5336
11.52	1.24		0.5765	-33.4711
11.53	1.23		0.577	-33.5336
11.54	1.55		0.5775	-33.6898
11.55	1.14		0.578	-34.5961
11.56	1.39		0.5785	-34.0648
11.57	0.73		0.579	-33.8148
11.58	1.01		0.5795	-33.5023
11.59	0.98		0.58	-33.6273
11.6	0.57		0.5805	-33.8148
11.61	1.05		0.581	-33.9086
11.62	0.53		0.5815	-33.5961
11.63	0.63		0.582	-34.0336
11.64	0.26		0.5825	-33.9086
11.65	0.21		0.583	-33.5336
11.66	0.63		0.5835	-34.4399
11.67	0.44		0.584	-34.2836
11.68	-0.03		0.5845	-34.0961
11.69	0.32		0.585	-33.8148
11.7	0.28		0.5855	-34.1899
11.71	0.41		0.586	-33.8461
11.72	-0.35		0.5865	-33.9711
11.73	0.48		0.587	-34.1899
11.74	0.79		0.5875	-33.8461
11.75	0.16		0.588	-34.4086
11.76	0.5		0.5885	-33.8148
11.77	0.13		0.589	-34.0648
11.78	0.5		0.5895	-33.9086
11.79	0.86		0.59	-33.5961
11.8	0.25		0.5905	-33.9086
11.81	0.2		0.591	-34.2211
11.82	-0.49		0.5915	-33.6586
11.83	0.16		0.592	-34.1274
11.84	0.37		0.5925	-34.1586
11.85	0.52		0.593	-34.0023
11.86	-0.11		0.5935	-34.0961
11.87	0.52		0.594	-34.5336
11.88	0.58		0.5945	-33.9086
11.89	1.15		0.595	-33.8461
11.9	0.8		0.5955	-34.2836
11.91	1.56		0.596	-34.0648
11.92	0.54		0.5965	-34.7524
11.93	-0.14		0.597	-34.6586
11.94	1.18		0.5975	-34.3774
11.95	0.81		0.598	-34.3149
11.96	1.77		0.5985	-33.7836
11.97	1.47		0.599	-34.7837
11.98	0.97		0.5995	-33.9711
11.99	1.39		0.6	-33.7523
12	1.63		0.6005	-34.1586
12.01	1.28		0.601	-33.8148
12.02	1.31		0.6015	-34.0336
12.03	1.78		0.602	-34.3149
12.04	0.9		0.6025	-34.0648
12.05	1.15		0.603	-34.4399
12.06	1.59		0.6035	-34.1899
12.07	1.84		0.604	-34.0961
12.08	1.48		0.6045	-34.0023
12.09	1.56		0.605	-34.0023
12.1	1.41		0.6055	-34.0961
12.11	1.26		0.606	-33.8148
12.12	1.56		0.6065	-33.9086
12.13	1.29		0.607	-33.9086
12.14	0.76		0.6075	-33.4711
12.15	0.28		0.608	-34.1586
12.16	1.16		0.6085	-33.9711
12.17	1.46		0.609	-34.1899
12.18	0.33		0.6095	-33.9711
12.19	0.8		0.61	-34.2836
12.2	0.45		0.6105	-33.8461
12.21	1.34		0.611	-33.6898
12.22	0.72		0.6115	-33.5336
12.23	1.53		0.612	-34.0336
12.24	0.38		0.6125	-33.6273
12.25	1.05		0.613	-33.5961
12.26	1.39		0.6135	-33.7836
12.27	0.71		0.614	-33.9086
12.28	1.39		0.6145	-33.9398
12.29	0.41		0.615	-33.6586
12.3	0.97		0.6155	-33.7836
12.31	0.44		0.616	-33.6273
12.32	0.98		0.6165	-33.9711
12.33	1.05		0.617	-33.9398
12.34	1.62		0.6175	-33.9086
12.35	1.58		0.618	-33.6586
12.36	2.3		0.6185	-33.4398
12.37	1.26		0.619	-33.6586
12.38	0.96		0.6195	-34.2836
12.39	1.85		0.62	-33.5023
12.4	1.96		0.6205	-33.7836
12.41	1.5		0.621	-33.5336
12.42	1.47		0.6215	-33.3148
12.43	1.67		0.622	-33.3773
12.44	1.66		0.6225	-34.3774
12.45	1.85		0.623	-33.6273
12.46	1.64		0.6235	-33.8148
12.47	1.57		0.624	-33.6898
12.48	1.49		0.6245	-33.3148
12.49	1.01		0.625	-33.5336
12.5	0.98		0.6255	-33.9711
12.51	1.79		0.626	-34.1899
12.52	1.9		0.6265	-33.7836
12.53	2.34		0.627	-33.7523
12.54	2.11		0.6275	-33.7523
12.55	2.75		0.628	-33.6273
12.56	1.93		0.6285	-34.0961
12.57	2.33		0.629	-34.1586
12.58	1.95		0.6295	-34.1586
12.59	1.97		0.63	-33.7211
12.6	2.17		0.6305	-33.4086
12.61	1.81		0.631	-32.9085
12.62	2.03		0.6315	-33.1898
12.63	2.57		0.632	-33.5336
12.64	2.49		0.6325	-33.8148
12.65	1.86		0.633	-34.0023
12.66	2.38		0.6335	-33.8461
12.67	2.5		0.634	-34.1586
12.68	3.08		0.6345	-34.0023
12.69	2.33		0.635	-33.7523
12.7	2.25		0.6355	-33.6586
12.71	1.87		0.636	-33.2835
12.72	1.99		0.6365	-33.5648
12.73	1.53		0.637	-33.5648
12.74	2.45		0.6375	-34.1899
12.75	1.45		0.638	-33.8461
12.76	1.64		0.6385	-33.9711
12.77	2		0.639	-33.346
12.78	1.25		0.6395	-33.7523
12.79	1.06		0.64	-34.0023
12.8	0.91		0.6405	-34.0336
12.81	1.35		0.641	-33.096
12.82	1.6		0.6415	-33.7836
12.83	0.6		0.642	-33.5961
12.84	2.11		0.6425	-33.346
12.85	2.2		0.643	-33.8148
12.86	2.51		0.6435	-34.1899
12.87	2.4		0.644	-33.7523
12.88	2.36		0.6445	-33.4711
12.89	1.89		0.645	-33.4711
12.9	2.66		0.6455	-33.7523
12.91	1.03		0.646	-33.6898
12.92	1.86		0.6465	-33.5961
12.93	1.73		0.647	-33.5961
12.94	1.85		0.6475	-33.8773
12.95	2.22		0.648	-33.7836
12.96	1.63		0.6485	-34.5336
12.97	1		0.649	-33.7836
12.98	1.02		0.6495	-33.6898
12.99	1.44		0.65	-33.5961
13	1.26		0.6505	-33.6273
13.01	0.69		0.651	-33.8461
13.02	0.4		0.6515	-33.8461
13.03	1.25		0.652	-33.9398
13.04	1.33		0.6525	-33.5961
13.05	0.81		0.653	-33.9711
13.06	1.45		0.6535	-33.4711
13.07	1.86		0.654	-33.9711
13.08	1.76		0.6545	-34.3149
13.09	1.92		0.655	-33.7523
13.1	2.35		0.6555	-33.5648
13.11	1.41		0.656	-33.6586
13.12	2.22		0.6565	-33.5023
13.13	1.95		0.657	-33.3773
13.14	1.96		0.6575	-33.346
13.15	1.68		0.658	-33.6898
13.16	1.77		0.6585	-33.6273
13.17	1.34		0.659	-34.1586
13.18	0.89		0.6595	-33.3773
13.19	1		0.66	-33.6586
13.2	1.81		0.6605	-33.5648
13.21	1.43		0.661	-33.6586
13.22	2.17		0.6615	-33.5648
13.23	0.92		0.662	-33.9711
13.24	1.56		0.6625	-33.6898
13.25	1.76		0.663	-33.6898
13.26	2.13		0.6635	-33.6586
13.27	1.27		0.664	-33.4086
13.28	0.77		0.6645	-33.8773
13.29	0.89		0.665	-33.2835
13.3	1.1		0.6655	-33.7211
13.31	1.32		0.666	-33.6898
13.32	2.09		0.6665	-34.1586
13.33	2.09		0.667	-33.8461
13.34	1.6		0.6675	-33.9711
13.35	2.09		0.668	-33.6273
13.36	2.87		0.6685	-34.0648
13.37	2.2		0.669	-33.7836
13.38	2.06		0.6695	-33.9711
13.39	1.19		0.67	-33.5961
13.4	2.19		0.6705	-33.8148
13.41	1.72		0.671	-34.0336
13.42	2.12		0.6715	-33.5961
13.43	2.41		0.672	-34.4711
13.44	3.13		0.6725	-34.1899
13.45	3.47		0.673	-34.1274
13.46	2.4		0.6735	-34.1899
13.47	3.57		0.674	-34.1899
13.48	2.37		0.6745	-34.3149
13.49	3.71		0.675	-34.1899
13.5	2.81		0.6755	-33.6273
13.51	3.22		0.676	-33.8148
13.52	2.74		0.6765	-33.4398
13.53	2.34		0.677	-33.7523
13.54	2.8		0.6775	-33.5961
13.55	2.54		0.678	-33.8773
13.56	1.88		0.6785	-33.5961
13.57	2.36		0.679	-33.8148
13.58	2.96		0.6795	-33.9398
13.59	2.47		0.68	-34.0336
13.6	3.71		0.6805	-33.9398
13.61	2.46		0.681	-33.5961
13.62	2.3		0.6815	-33.6273
13.63	2.19		0.682	-33.6273
13.64	1.62		0.6825	-34.0023
13.65	1.21		0.683	-33.6898
13.66	1.43		0.6835	-34.4711
13.67	1.2		0.684	-33.8148
13.68	0.08		0.6845	-33.9398
13.69	-0.03		0.685	-33.9086
13.7	0.52		0.6855	-33.5648
13.71	-0.27		0.686	-33.9086
13.72	-0.4		0.6865	-33.6898
13.73	-0.02		0.687	-33.5961
13.74	-0.58		0.6875	-33.8461
13.75	-0.88		0.688	-33.5648
13.76	-0.17		0.6885	-33.2835
13.77	-0.18		0.689	-33.8773
13.78	-1.33		0.6895	-33.4711
13.79	-0.79		0.69	-34.1274
13.8	-0.99		0.6905	-33.5961
13.81	-1.14		0.691	-33.5648
13.82	-1.08		0.6915	-33.6273
13.83	-0.97		0.692	-33.6898
13.84	-1.05		0.6925	-34.3461
13.85	-0.6		0.693	-34.3461
13.86	-1.29		0.6935	-33.5648
13.87	0.32		0.694	-34.2836
13.88	0.64		0.6945	-34.0648
13.89	0.07		0.695	-33.4086
13.9	0.79		0.6955	-33.8461
13.91	1.37		0.696	-33.8461
13.92	1.22		0.6965	-34.1274
13.93	0.71		0.697	-34.3149
13.94	1.37		0.6975	-33.8461
13.95	1.61		0.698	-33.9086
13.96	1.16		0.6985	-34.5649
13.97	1.25		0.699	-34.5336
13.98	1.41		0.6995	-34.3774
13.99	0.1		0.7	-34.8149
14	0.38		0.7005	-34.0648
14.01	-0.42		0.701	-34.0336
14.02	0.91		0.7015	-34.0648
14.03	0.79		0.702	-33.9711
14.04	1.84		0.7025	-34.0023
14.05	1.91		0.703	-34.3149
14.06	2.51		0.7035	-34.1274
14.07	1.99		0.704	-34.4086
14.08	2.37		0.7045	-34.2836
14.09	3.1		0.705	-34.5024
14.1	2.75		0.7055	-34.0648
14.11	3.38		0.706	-34.5649
14.12	3.14		0.7065	-34.0336
14.13	3.28		0.707	-34.0023
14.14	2.39		0.7075	-34.0336
14.15	3.76		0.708	-33.8461
14.16	3.29		0.7085	-34.0961
14.17	3.6		0.709	-34.1274
14.18	2.15		0.7095	-34.2211
14.19	2.2		0.71	-33.4711
14.2	2.59		0.7105	-34.0336
14.21	1.97		0.711	-34.1899
14.22	2.38		0.7115	-33.7836
14.23	1.75		0.712	-34.1899
14.24	2.27		0.7125	-34.5649
14.25	1.32		0.713	-34.8149
14.26	1.32		0.7135	-34.1899
14.27	1.06		0.714	-34.5336
14.28	1.44		0.7145	-33.9398
14.29	2.03		0.715	-33.6273
14.3	2.16		0.7155	-34.3774
14.31	2.51		0.716	-34.4086
14.32	2.6		0.7165	-34.0961
14.33	3.46		0.717	-34.0648
14.34	3.7		0.7175	-33.7211
14.35	4.07		0.718	-33.6273
14.36	3.71		0.7185	-34.4399
14.37	2.55		0.719	-34.3461
14.38	3.44		0.7195	-33.9711
14.39	3.97		0.72	-34.0336
14.4	3.23		0.7205	-33.6898
14.41	2.14		0.721	-35.1274
14.42	2.71		0.7215	-34.0648
14.43	1.81		0.722	-34.1899
14.44	2.55		0.7225	-34.2836
14.45	1.25		0.723	-33.8148
14.46	1.48		0.7235	-33.8773
14.47	0.79		0.724	-33.9398
14.48	0.81		0.7245	-33.6273
14.49	0.43		0.725	-33.7211
14.5	1.09		0.7255	-34.1274
14.51	1.05		0.726	-33.8148
14.52	0.95		0.7265	-33.7836
14.53	1.76		0.727	-33.9398
14.54	1.82		0.7275	-33.5336
14.55	2.07		0.728	-34.0961
14.56	2.52		0.7285	-34.0023
14.57	2.91		0.729	-34.0336
14.58	3.46		0.7295	-33.8148
14.59	2.84		0.73	-33.8773
14.6	2.11		0.7305	-33.6586
14.61	2.03		0.731	-34.2524
14.62	1.46		0.7315	-33.8461
14.63	2.11		0.732	-33.6898
14.64	0.94		0.7325	-33.5648
14.65	0.1		0.733	-34.5024
14.66	-0.51		0.7335	-34.0648
14.67	0.24		0.734	-34.4711
14.68	-0.09		0.7345	-34.5961
14.69	-0.9		0.735	-34.5961
14.7	-0.51		0.7355	-34.1586
14.71	0.03		0.736	-34.2836
14.72	-0.25		0.7365	-34.3461
14.73	-0.21		0.737	-34.0961
14.74	0.1		0.7375	-34.3149
14.75	0.52		0.738	-34.4086
14.76	-0.15		0.7385	-34.5024
14.77	0.12		0.739	-34.3149
14.78	0.32		0.7395	-34.5024
14.79	0.21		0.74	-34.0023
14.8	0.37		0.7405	-34.1274
14.81	0.05		0.741	-33.9711
14.82	0.69		0.7415	-33.9398
14.83	-0.02		0.742	-33.8461
14.84	0.95		0.7425	-34.0023
14.85	-0.47		0.743	-34.0023
14.86	-0.11		0.7435	-33.8461
14.87	-0.15		0.744	-33.6898
14.88	0.12		0.7445	-34.3774
14.89	-0.32		0.745	-33.6898
14.9	0.28		0.7455	-34.1586
14.91	0.29		0.746	-33.7836
14.92	0.45		0.7465	-34.0648
14.93	0.61		0.747	-33.346
14.94	0.33		0.7475	-33.8148
14.95	0.08		0.748	-34.0336
14.96	-0.62		0.7485	-33.9086
14.97	-0.15		0.749	-34.5024
14.98	0.36		0.7495	-34.1899
14.99	-0.31		0.75	-33.5648
15	0.05		0.7505	-33.4711
15.01	-0.2		0.751	-33.9398
15.02	0.24		0.7515	-33.6898
15.03	-0.19		0.752	-34.0336
15.04	0.13		0.7525	-34.3149
15.05	-0.77		0.753	-33.7211
15.06	0.28		0.7535	-33.5648
15.07	0.99		0.754	-33.6273
15.08	0.12		0.7545	-33.3773
15.09	0.36		0.755	-33.7523
15.1	0.85		0.7555	-33.6273
15.11	1.16		0.756	-33.2835
15.12	0.38		0.7565	-33.5023
15.13	0.91		0.757	-33.5648
15.14	0.93		0.7575	-34.1274
15.15	0.32		0.758	-33.0335
15.16	0.34		0.7585	-33.8148
15.17	0.53		0.759	-33.5961
15.18	1		0.7595	-33.8148
15.19	1.16		0.76	-33.5023
15.2	-0.13		0.7605	-34.0961
15.21	0.22		0.761	-34.0336
15.22	0.22		0.7615	-33.8461
15.23	1.61		0.762	-33.6898
15.24	0.58		0.7625	-33.5961
15.25	0.89		0.763	-33.7523
15.26	0.62		0.7635	-33.5961
15.27	0.99		0.764	-33.8148
15.28	0.51		0.7645	-33.8461
15.29	1.13		0.765	-33.4711
15.3	1.08		0.7655	-33.4086
15.31	-0.12		0.766	-33.4711
15.32	-0.56		0.7665	-33.7523
15.33	-0.34		0.767	-33.0648
15.34	-0.46		0.7675	-33.5023
15.35	-0.92		0.768	-33.5336
15.36	-0.21		0.7685	-33.2523
15.37	-0.38		0.769	-34.0648
15.38	-0.77		0.7695	-33.4711
15.39	0.04		0.77	-33.7836
15.4	0.44		0.7705	-33.5336
15.41	-0.07		0.771	-33.4086
15.42	-0.43		0.7715	-33.346
15.43	-0.78		0.772	-33.4398
15.44	0.6		0.7725	-33.6586
15.45	0.44		0.773	-33.5648
15.46	0.28		0.7735	-33.3148
15.47	0.26		0.774	-33.1898
15.48	-0.7		0.7745	-33.5648
15.49	-0.41		0.775	-33.096
15.5	0.43		0.7755	-33.6898
15.51	-0.16		0.776	-33.6273
15.52	0.11		0.7765	-33.8461
15.53	-0.07		0.777	-33.3773
15.54	0.04		0.7775	-33.5336
15.55	0.11		0.778	-33.6273
15.56	0.43		0.7785	-33.0335
15.57	0.07		0.779	-33.6898
15.58	0.89		0.7795	-33.1898
15.59	0.59		0.78	-33.7523
15.6	0.28		0.7805	-33.2835
15.61	0.69		0.781	-33.6273
15.62	0.45		0.7815	-33.4711
15.63	0.28		0.782	-33.5023
15.64	0.55		0.7825	-33.5961
15.65	0.76		0.783	-33.5961
15.66	0.89		0.7835	-33.6898
15.67	0.5		0.784	-33.4086
15.68	1.13		0.7845	-33.9398
15.69	0.22		0.785	-33.9711
15.7	-0.43		0.7855	-34.0336
15.71	0.1		0.786	-33.8773
15.72	-0.36		0.7865	-34.2836
15.73	-0.62		0.787	-34.8462
15.74	0.1		0.7875	-34.1586
15.75	-0.14		0.788	-34.0023
15.76	0.47		0.7885	-34.5024
15.77	0.32		0.789	-34.0648
15.78	-0.22		0.7895	-33.9711
15.79	0.32		0.79	-34.4399
15.8	-0.06		0.7905	-34.1899
15.81	-0.08		0.791	-34.4711
15.82	0.37		0.7915	-34.5961
15.83	0.6		0.792	-34.0023
15.84	0.71		0.7925	-34.3461
15.85	-0.49		0.793	-34.0023
15.86	0.1		0.7935	-34.2836
15.87	0.09		0.794	-34.5649
15.88	-0.41		0.7945	-34.0961
15.89	-0.14		0.795	-34.6899
15.9	-0.26		0.7955	-34.1899
15.91	0.07		0.796	-34.2836
15.92	-1.09		0.7965	-34.0648
15.93	-1.01		0.797	-34.0336
15.94	0.32		0.7975	-33.8148
15.95	-0.24		0.798	-34.2524
15.96	0.38		0.7985	-33.4398
15.97	0.31		0.799	-33.9398
15.98	-0.38		0.7995	-33.9398
15.99	-0.41		0.8	-34.2836
16	-0.1		0.8005	-34.1899
16.01	-0.48		0.801	-33.9086
16.02	-0.75		0.8015	-33.3773
16.03	-0.49		0.802	-33.4711
16.04	-0.83		0.8025	-33.4711
16.05	0.08		0.803	-33.5961
16.06	-0.16		0.8035	-33.1898
16.07	0.61		0.804	-33.4398
16.08	0.14		0.8045	-33.5023
16.09	0.01		0.805	-33.8461
16.1	-0.29		0.8055	-33.7836
16.11	-0.56		0.806	-33.8148
16.12	-0.8		0.8065	-33.6586
16.13	-0.01		0.807	-33.7523
16.14	-0.03		0.8075	-33.2835
16.15	0.03		0.808	-33.4711
16.16	-0.25		0.8085	-33.5648
16.17	-0.25		0.809	-33.6273
16.18	-0.02		0.8095	-33.8148
16.19	0.47		0.81	-34.0023
16.2	-0.24		0.8105	-33.8148
16.21	-0.35		0.811	-33.5023
16.22	-0.79		0.8115	-33.8461
16.23	-0.19		0.812	-33.5648
16.24	-0.58		0.8125	-33.5336
16.25	-0.89		0.813	-33.6273
16.26	-0.49		0.8135	-33.6586
16.27	0.43		0.814	-33.0335
16.28	0.03		0.8145	-33.5336
16.29	-0.61		0.815	-33.4711
16.3	-0.59		0.8155	-33.2835
16.31	-0.38		0.816	-33.2835
16.32	-0.77		0.8165	-33.5023
16.33	-0.24		0.817	-33.1273
16.34	-0.45		0.8175	-33.4086
16.35	0.33		0.818	-33.3148
16.36	-0.31		0.8185	-33.3148
16.37	0.74		0.819	-33.4398
16.38	-0.23		0.8195	-32.846
16.39	0.34		0.82	-33.6898
16.4	0.13		0.8205	-33.8461
16.41	-0.43		0.821	-33.9086
16.42	0.02		0.8215	-33.4398
16.43	-0.18		0.822	-33.6586
16.44	0.02		0.8225	-33.3148
16.45	-0.5		0.823	-33.5336
16.46	-0.09		0.8235	-33.5023
16.47	-0.4		0.824	-33.5648
16.48	-0.29		0.8245	-34.0023
16.49	-0.57		0.825	-33.9398
16.5	-0.15		0.8255	-33.1898
16.51	-0.45		0.826	-33.9086
16.52	-0.34		0.8265	-33.7836
16.53	-0.35		0.827	-33.5336
16.54	-0.2		0.8275	-33.7836
16.55	0.1		0.828	-32.9398
16.56	0.49		0.8285	-33.2835
16.57	0.09		0.829	-33.1585
16.58	-1.15		0.8295	-33.1898
16.59	-0.18		0.83	-33.1585
16.6	-0.78		0.8305	-33.1898
16.61	0.07		0.831	-33.9711
16.62	0.05		0.8315	-33.0335
16.63	0.21		0.832	-33.4398
16.64	0.14		0.8325	-33.3773
16.65	-1.05		0.833	-34.0023
16.66	-0.09		0.8335	-33.9086
16.67	-0.67		0.834	-33.6586
16.68	-0.01		0.8345	-33.7836
16.69	-0.36		0.835	-33.4086
16.7	-0.56		0.8355	-33.5336
16.71	-0.99		0.836	-33.3148
16.72	0.2		0.8365	-33.8773
16.73	0.2		0.837	-33.4711
16.74	-0.16		0.8375	-33.1898
16.75	-0.03		0.838	-33.1585
16.76	-0.2		0.8385	-33.6586
16.77	0.41		0.839	-33.4086
16.78	0.05		0.8395	-33.5023
16.79	0.48		0.84	-33.4398
16.8	0.25		0.8405	-33.4398
16.81	0.82		0.841	-33.346
16.82	0.71		0.8415	-33.4711
16.83	0.54		0.842	-33.346
16.84	-0.33		0.8425	-33.7836
16.85	0.51		0.843	-33.4086
16.86	0.59		0.8435	-33.6586
16.87	0.34		0.844	-33.346
16.88	-0.21		0.8445	-33.221
16.89	0.13		0.845	-33.4086
16.9	0.6		0.8455	-33.5961
16.91	1.13		0.846	-33.8148
16.92	0.39		0.8465	-33.5961
16.93	0.93		0.847	-33.5961
16.94	-0.61		0.8475	-33.1898
16.95	0		0.848	-33.1273
16.96	0.39		0.8485	-33.9086
16.97	0.25		0.849	-33.7523
16.98	-0.03		0.8495	-32.8773
16.99	0.22		0.85	-33.1898
17	0.49		0.8505	-32.9085
17.01	-0.09		0.851	-33.2523
17.02	0.18		0.8515	-33.3148
17.03	-0.03		0.852	-33.2523
17.04	-0.09		0.8525	-32.6898
17.05	0.02		0.853	-32.9085
17.06	-0.19		0.8535	-33.1898
17.07	-0.82		0.854	-33.5648
17.08	-0.1		0.8545	-33.0648
17.09	-0.24		0.855	-32.846
17.1	0.41		0.8555	-33.0648
17.11	-0.21		0.856	-32.7523
17.12	-0.82		0.8565	-33.3148
17.13	-0.33		0.857	-32.846
17.14	-0.54		0.8575	-32.8773
17.15	-0.5		0.858	-33.2835
17.16	-0.42		0.8585	-32.8148
17.17	0.02		0.859	-32.7835
17.18	-0.67		0.8595	-32.5022
17.19	-0.39		0.86	-32.971
17.2	-0.63		0.8605	-32.5022
17.21	0.13		0.861	-32.346
17.22	-0.29		0.8615	-32.7835
17.23	-0.14		0.862	-32.6898
17.24	-0.16		0.8625	-33.1898
17.25	-0.45		0.863	-33.1898
17.26	-0.32		0.8635	-33.5648
17.27	-0.19		0.864	-33.1898
17.28	-0.76		0.8645	-33.0335
17.29	-0.2		0.865	-33.5961
17.3	-0.31		0.8655	-32.9398
17.31	-0.5		0.866	-33.096
17.32	-1.07		0.8665	-33.0648
17.33	-0.87		0.867	-33.1273
17.34	-0.85		0.8675	-33.096
17.35	-0.79		0.868	-33.096
17.36	-0.51		0.8685	-33.3773
17.37	-0.2		0.869	-33.4398
17.38	-0.7		0.8695	-33.2523
17.39	-1.18		0.87	-33.5961
17.4	-0.67		0.8705	-32.9398
17.41	-0.82		0.871	-33.0023
17.42	-0.33		0.8715	-33.346
17.43	-0.54		0.872	-33.4086
17.44	-1.46		0.8725	-32.971
17.45	-1.21		0.873	-33.1273
17.46	-0.42		0.8735	-32.971
17.47	-0.85		0.874	-33.1585
17.48	-0.1		0.8745	-33.1898
17.49	0.1		0.875	-33.4398
17.5	-0.82		0.8755	-33.346
17.51	-0.71		0.876	-32.971
17.52	-0.69		0.8765	-33.2835
17.53	-0.58		0.877	-32.971
17.54	-0.9		0.8775	-32.971
17.55	-0.5		0.878	-33.4398
17.56	-0.72		0.8785	-33.4711
17.57	-0.58		0.879	-32.721
17.58	-0.09		0.8795	-33.0023
17.59	-0.6		0.88	-33.096
17.6	-0.39		0.8805	-32.6898
17.61	-0.88		0.881	-33.1898
17.62	-0.65		0.8815	-32.8773
17.63	-0.31		0.882	-32.8148
17.64	-0.18		0.8825	-33.346
17.65	-1.28		0.883	-33.1585
17.66	-0.24		0.8835	-32.846
17.67	-0.18		0.884	-33.1898
17.68	-0.88		0.8845	-33.3148
17.69	-1.14		0.885	-33.6898
17.7	-1.13		0.8855	-32.9398
17.71	-0.99		0.886	-33.1898
17.72	-0.29		0.8865	-32.9085
17.73	-0.76		0.887	-33.0648
17.74	-1.15		0.8875	-33.1898
17.75	-1.64		0.888	-33.0335
17.76	-0.96		0.8885	-33.4711
17.77	-1.36		0.889	-33.1898
17.78	-1.25		0.8895	-33.5648
17.79	-1.62		0.89	-33.1898
17.8	-1.3		0.8905	-33.1585
17.81	-0.59		0.891	-34.0023
17.82	-1.19		0.8915	-33.6586
17.83	-0.8		0.892	-32.7835
17.84	-0.25		0.8925	-33.2523
17.85	-0.09		0.893	-33.096
17.85	-1.25		0.8935	-32.846
17.86	-0.79		0.894	-32.846
17.87	-0.77		0.8945	-32.471
17.88	-0.48		0.895	-32.5022
17.89	-1.63		0.8955	-32.6898
17.9	-1.04		0.896	-33.0648
17.91	-0.28		0.8965	-33.0023
17.92	-1.44		0.897	-32.7523
17.93	-0.43		0.8975	-32.846
17.94	-0.43		0.898	-33.1898
17.95	-0.19		0.8985	-33.5023
17.96	-0.9		0.899	-33.5023
17.97	-0.64		0.8995	-33.1898
17.98	-0.34		0.9	-33.0648
17.99	-0.63		0.9005	-32.4085
18	-0.88		0.901	-32.8773
18.01	-2.04		0.9015	-33.5336
18.02	-0.86		0.902	-32.8148
18.03	-0.57		0.9025	-33.096
18.04	-1.58		0.903	-32.5647
18.05	-1.22		0.9035	-32.6585
18.06	-1.14		0.904	-33.096
18.07	-0.66		0.9045	-33.0023
18.08	-1.56		0.905	-32.7835
18.09	-0.95		0.9055	-32.9398
18.1	-1.01		0.906	-32.9085
18.11	-1.34		0.9065	-33.2523
18.12	-0.87		0.907	-33.0023
18.13	-0.82		0.9075	-33.0023
18.14	-1.1		0.908	-32.846
18.15	-1.11		0.9085	-32.5647
18.16	-1.31		0.909	-33.4711
18.17	-0.45		0.9095	-32.596
18.18	-0.42		0.91	-33.4398
18.19	-0.82		0.9105	-32.721
18.2	-0.68		0.911	-32.6272
18.21	-0.32		0.9115	-32.4085
18.22	-0.68		0.912	-32.3772
18.23	-0.71		0.9125	-32.4397
18.24	-0.36		0.913	-32.5022
18.25	-0.63		0.9135	-32.0647
18.26	-0.33		0.914	-32.1897
18.27	-0.3		0.9145	-32.1272
18.28	-1.06		0.915	-32.0647
18.29	-0.44		0.9155	-32.3772
18.3	-0.7		0.916	-32.471
18.31	-1.64		0.9165	-32.0647
18.32	-0.72		0.917	-32.2835
18.33	-1.37		0.9175	-32.2835
18.34	-0.09		0.918	-32.721
18.35	-0.77		0.9185	-32.1897
18.36	-1.32		0.919	-32.1897
18.37	-0.4		0.9195	-31.7522
18.38	-0.87		0.92	-32.5335
18.39	-0.5		0.9205	-32.096
18.4	-0.75		0.921	-32.096
18.41	-0.72		0.9215	-32.5647
18.42	-1.21		0.922	-31.8459
18.43	-0.47		0.9225	-32.0335
18.44	-0.74		0.923	-32.5335
18.45	-1.29		0.9235	-32.596
18.46	-0.69		0.924	-32.3772
18.47	-1.67		0.9245	-32.7523
18.48	-0.7		0.925	-32.7523
18.49	-1.56		0.9255	-32.4085
18.5	-0.65		0.926	-32.5335
18.51	-0.95		0.9265	-32.6585
18.52	-0.4		0.927	-33.0648
18.53	-0.85		0.9275	-32.8148
18.54	-0.18		0.928	-32.2835
18.55	-0.21		0.9285	-32.7523
18.56	-0.55		0.929	-32.8773
18.57	-0.95		0.9295	-32.346
18.58	-0.54		0.93	-31.9397
18.59	-0.49		0.9305	-32.971
18.6	-0.64		0.931	-32.5335
18.61	-1.33		0.9315	-33.2835
18.62	0.1		0.932	-32.8148
18.63	-1.37		0.9325	-32.5335
18.64	-0.54		0.933	-32.0335
18.65	-1.18		0.9335	-32.6272
18.66	-1.14		0.934	-32.5647
18.67	-1.43		0.9345	-32.4085
18.68	-0.99		0.935	-32.5335
18.69	-1.44		0.9355	-32.5647
18.7	-0.99		0.936	-33.1273
18.71	-0.59		0.9365	-32.6585
18.72	-1.57		0.937	-32.846
18.73	-1.46		0.9375	-32.5647
18.74	-1.04		0.938	-32.8148
18.75	-1.21		0.9385	-33.0648
18.76	-1.08		0.939	-33.221
18.77	-0.46		0.9395	-33.0023
18.78	-1.01		0.94	-33.1585
18.79	-0.62		0.9405	-32.6898
18.8	-1.57		0.941	-32.6898
18.81	-0.88		0.9415	-33.0648
18.82	-0.15		0.942	-32.7835
18.83	-0.93		0.9425	-33.0335
18.84	-0.29		0.943	-32.2835
18.85	-1.08		0.9435	-33.096
18.86	-1.12		0.944	-32.6272
18.87	-1.23		0.9445	-32.5647
18.88	-1.17		0.945	-32.721
18.89	-1.41		0.9455	-32.471
18.9	-0.84		0.946	-32.9085
18.91	-0.81		0.9465	-32.6585
18.92	-0.65		0.947	-32.4085
18.93	-1.08		0.9475	-32.9085
18.94	-0.82		0.948	-33.0648
18.95	-1.81		0.9485	-32.7835
18.96	-1.54		0.949	-33.1585
18.97	-1.28		0.9495	-32.971
18.98	-0.88		0.95	-32.4397
18.99	-1.36		0.9505	-33.4086
19	-0.99		0.951	-33.0335
19.01	-1.26		0.9515	-33.1273
19.02	-0.63		0.952	-33.2523
19.03	-1.12		0.9525	-32.596
19.04	-0.74		0.953	-33.346
19.05	-0.65		0.9535	-33.346
19.06	0.1		0.954	-33.0335
19.07	-0.63		0.9545	-33.0335
19.08	-0.51		0.955	-33.3773
19.09	-0.94		0.9555	-33.1898
19.1	-0.4		0.956	-33.1585
19.11	-0.36		0.9565	-33.5648
19.12	-0.44		0.957	-33.2835
19.13	-0.31		0.9575	-33.5336
19.14	-0.14		0.958	-33.1585
19.15	-1.3		0.9585	-33.0023
19.16	-0.1		0.959	-33.4711
19.17	-0.1		0.9595	-33.6586
19.18	-0.65		0.96	-33.3773
19.19	-0.65		0.9605	-33.3148
19.2	-0.24		0.961	-33.1585
19.21	-0.76		0.9615	-33.0648
19.22	-1.22		0.962	-32.846
19.23	-0.56		0.9625	-32.9398
19.24	-0.18		0.963	-32.846
19.25	-0.03		0.9635	-32.8773
19.26	-0.49		0.964	-32.471
19.27	-0.34		0.9645	-32.1897
19.28	-0.72		0.965	-32.6585
19.29	0.07		0.9655	-32.6585
19.3	-0.55		0.966	-32.6585
19.31	-0.95		0.9665	-32.5647
19.32	-0.69		0.967	-32.4397
19.33	-1.16		0.9675	-33.1273
19.34	-0.63		0.968	-32.9398
19.35	-0.18		0.9685	-32.346
19.36	-1.01		0.969	-33.1585
19.37	-0.69		0.9695	-32.6272
19.38	-0.34		0.97	-31.971
19.39	-0.11		0.9705	-32.0022
19.4	-1.23		0.971	-32.7835
19.41	-0.83		0.9715	-32.5335
19.42	-0.83		0.972	-32.8773
19.43	-1.11		0.9725	-32.6585
19.44	-0.86		0.973	-32.0647
19.45	-0.12		0.9735	-32.3772
19.46	-0.4		0.974	-31.6584
19.47	-0.75		0.9745	-32.1272
19.48	-0.1		0.975	-32.1272
19.49	-0.8		0.9755	-32.1585
19.5	-1.16		0.976	-31.6584
19.51	-0.56		0.9765	-31.8147
19.52	-1.12		0.977	-32.0022
19.53	-0.48		0.9775	-32.3772
19.54	-0.83		0.978	-32.1585
19.55	-1.03		0.9785	-32.3147
19.56	-0.89		0.979	-32.0647
19.57	-0.56		0.9795	-31.8147
19.58	-0.62		0.98	-32.096
19.59	-0.75		0.9805	-31.971
19.6	-0.82		0.981	-31.7834
19.61	-0.42		0.9815	-31.0334
19.62	-0.66		0.982	-31.5334
19.63	-1.08		0.9825	-31.4709
19.64	-1		0.983	-31.3772
19.65	-1.45		0.9835	-31.5334
19.66	-1.96		0.984	-31.5022
19.67	-1.13		0.9845	-31.1272
19.68	-1.09		0.985	-31.4084
19.69	-0.64		0.9855	-30.9709
19.7	-1.5		0.986	-31.4709
19.71	-0.91		0.9865	-31.1897
19.72	-0.19		0.987	-31.0959
19.73	-1.05		0.9875	-31.2522
19.74	-1.44		0.988	-31.0646
19.75	-0.56		0.9885	-31.8147
19.76	-0.77		0.989	-31.4709
19.77	-0.73		0.9895	-31.1272
19.78	-1.37		0.99	-30.8771
19.79	-0.56		0.9905	-30.5021
19.8	-1.33		0.991	-31.2522
19.81	-0.63		0.9915	-31.3147
19.82	-0.64		0.992	-31.2834
19.83	-0.12		0.9925	-31.4084
19.84	-1.36		0.993	-31.1272
19.85	-0.5		0.9935	-30.7521
19.86	-0.5		0.994	-30.8146
19.87	-0.58		0.9945	-30.6896
19.88	-0.81		0.995	-30.5021
19.89	-1.21		0.9955	-30.8771
19.9	-0.4		0.996	-30.5646
19.91	-1.21		0.9965	-30.6584
19.92	-0.41		0.997	-30.7521
19.93	0		0.9975	-30.6271
19.94	-0.78		0.998	-30.5021
19.95	-0.9		0.9985	-30.4083
19.96	-1.02		0.999	-29.9083
[truncated: 48,001 more rows]

## Sheet: ED Figure 7B
	Fluorescence		Patch-clamp
Time	DF/F0 (bleaching-corrected)	Time	Membrane potential
0.0109	1.15	0	-25.5312
0.0218	0.65	0.0005	-25.2812
0.0327	-0.27	0.001	-25.3438
0.0436	-0.35	0.0015	-25.6562
0.0545	-0.28	0.002	-25.6562
0.0654	0.01	0.0025	-25.6875
0.0763	-0.1	0.003	-25.5938
0.0872	-0.51	0.0035	-25.7188
0.0981	-0.31	0.004	-25.875
0.109	-0.26	0.0045	-25.75
0.1199	-0.32	0.005	-25.7188
0.1308	-0.22	0.0055	-25.7188
0.1417	-0.21	0.006	-25.7812
0.1526	-0.55	0.0065	-25.8438
0.1635	-0.58	0.007	-25.8125
0.1744	-1.02	0.0075	-25.75
0.1853	-0.28	0.008	-25.75
0.1962	0.17	0.0085	-25.8438
0.2071	-0.03	0.009	-25.9062
0.218	-0.15	0.0095	-25.5938
0.2288	-0.31	0.01	-25.5312
0.2397	-0.37	0.0105	-25.625
0.2506	-0.03	0.011	-25.5
0.2615	-0.54	0.0115	-25.5312
0.2724	-0.39	0.012	-25.7188
0.2833	-0.59	0.0125	-25.5312
0.2942	0.18	0.013	-25.8125
0.3051	-0.71	0.0135	-25.75
0.316	-0.46	0.014	-25.8438
0.3269	-0.09	0.0145	-25.5938
0.3378	-0.01	0.015	-25.625
0.3487	-0.39	0.0155	-25.7812
0.3596	-0.47	0.016	-25.6562
0.3705	0.47	0.0165	-25.6875
0.3814	0	0.017	-25.4688
0.3923	-0.22	0.0175	-25.4062
0.4032	-0.26	0.018	-25.1562
0.4141	-0.37	0.0185	-24.9688
0.425	0.14	0.019	-24.9688
0.4359	-0.48	0.0195	-25.0312
0.4468	-0.53	0.02	-24.9375
0.4577	0.09	0.0205	-25
0.4686	0.39	0.021	-24.9062
0.4795	-0.09	0.0215	-24.9688
0.4904	-0.58	0.022	-25.0312
0.5013	0.06	0.0225	-25.0625
0.5122	-0.49	0.023	-25.125
0.5231	0.03	0.0235	-25.0938
0.534	0.24	0.024	-24.875
0.5449	0.09	0.0245	-24.9688
0.5558	-0.26	0.025	-24.8125
0.5667	-0.06	0.0255	-24.875
0.5776	-0.14	0.026	-24.7188
0.5885	-0.28	0.0265	-24.9375
0.5994	0.05	0.027	-25
0.6103	0.15	0.0275	-24.9375
0.6212	0.04	0.028	-25
0.6321	0.04	0.0285	-24.8438
0.643	-0.04	0.029	-25.0625
0.6539	0.14	0.0295	-24.6562
0.6648	-0.12	0.03	-24.75
0.6757	-0.2	0.0305	-24.9375
0.6866	0.52	0.031	-24.875
0.6974	0.09	0.0315	-24.9688
0.7083	-0.08	0.032	-25.0312
0.7192	-0.51	0.0325	-24.9688
0.7301	0.35	0.033	-25
0.741	0.06	0.0335	-25.0312
0.7519	-0.02	0.034	-25.0938
0.7628	0.37	0.0345	-25.0312
0.7737	-0.62	0.035	-24.9688
0.7846	-0.06	0.0355	-25.0312
0.7955	0.28	0.036	-24.875
0.8064	0.4	0.0365	-24.9062
0.8173	0.29	0.037	-24.8438
0.8282	0.2	0.0375	-24.8438
0.8391	0.12	0.038	-24.875
0.85	-0.02	0.0385	-24.875
0.8609	-0.31	0.039	-24.875
0.8718	-0.05	0.0395	-25.0938
0.8827	0.34	0.04	-24.9375
0.8936	0.49	0.0405	-25.0938
0.9045	0.29	0.041	-25.125
0.9154	0.12	0.0415	-25.1875
0.9263	0.12	0.042	-25.125
0.9372	0.47	0.0425	-25.2812
0.9481	0.09	0.043	-25.2188
0.959	0.55	0.0435	-25.375
0.9699	0.19	0.044	-25.4062
0.9808	0.17	0.0445	-25.375
0.9917	0.24	0.045	-25.5
1.0026	0.84	0.0455	-25.5625
1.0135	0.04	0.046	-25.5312
1.0244	-0.14	0.0465	-25.5312
1.0353	0.49	0.047	-25.7188
1.0462	0.44	0.0475	-25.5625
1.0571	0.41	0.048	-25.6562
1.068	0.56	0.0485	-25.8125
1.0789	-0.15	0.049	-25.8438
1.0898	0.55	0.0495	-25.5938
1.1007	0.19	0.05	-25.7188
1.1116	0.13	0.0505	-25.7812
1.1225	0.48	0.051	-25.75
1.1334	0.57	0.0515	-25.8438
1.1443	0.42	0.052	-25.8125
1.1551	0.16	0.0525	-25.9375
1.166	0.5	0.053	-25.9062
1.1769	0.57	0.0535	-26.0938
1.1878	0.38	0.054	-25.875
1.1987	0.39	0.0545	-25.8125
1.2096	0.31	0.055	-26.0312
1.2205	0.44	0.0555	-25.8438
1.2314	0.55	0.056	-25.8125
1.2423	0.55	0.0565	-25.9062
1.2532	0.14	0.057	-26.0625
1.2641	-0.14	0.0575	-25.9062
1.275	0.47	0.058	-26.0625
1.2859	0.3	0.0585	-26.0625
1.2968	0.11	0.059	-26.0938
1.3077	0.35	0.0595	-26.1875
1.3186	0.46	0.06	-26.1875
1.3295	0.38	0.0605	-26.1875
1.3404	0.55	0.061	-26.125
1.3513	0.09	0.0615	-26.125
1.3622	0.25	0.062	-26.4062
1.3731	0.12	0.0625	-26.1875
1.384	-0.37	0.063	-26.375
1.3949	0.14	0.0635	-26.4062
1.4058	0.53	0.064	-26.5
1.4167	0.1	0.0645	-26.4688
1.4276	0.3	0.065	-26.4375
1.4385	-0.32	0.0655	-26.625
1.4494	0.26	0.066	-26.4062
1.4603	0.86	0.0665	-26.5312
1.4712	0.22	0.067	-26.5938
1.4821	-0.15	0.0675	-26.5
1.493	0.16	0.068	-26.8438
1.5039	-0.11	0.0685	-26.75
1.5148	-0.05	0.069	-26.75
1.5257	0.35	0.0695	-26.4688
1.5366	0.1	0.07	-26.7188
1.5475	0.18	0.0705	-26.8438
1.5584	-0.07	0.071	-26.7188
1.5693	0.2	0.0715	-26.75
1.5802	0.16	0.072	-26.8125
1.5911	-0.05	0.0725	-26.625
1.602	0.59	0.073	-26.9375
1.6128	0.02	0.0735	-27.125
1.6237	-0.03	0.074	-26.9375
1.6346	0.5	0.0745	-26.8125
1.6455	0.08	0.075	-27.1562
1.6564	0.15	0.0755	-27.0938
1.6673	0.38	0.076	-27.1875
1.6782	0.48	0.0765	-27.1562
1.6891	-0.16	0.077	-27.0938
1.7	0.23	0.0775	-27.0938
1.7109	0.31	0.078	-27.2812
1.7218	0.32	0.0785	-27.25
1.7327	-0.03	0.079	-27.1875
1.7436	0.2	0.0795	-27.375
1.7545	0.3	0.08	-27.25
1.7654	0.41	0.0805	-27.375
1.7763	0.23	0.081	-27.1562
1.7872	0.3	0.0815	-27.375
1.7981	0.31	0.082	-27.25
1.809	0.26	0.0825	-27.2188
1.8199	0.42	0.083	-27.5
1.8308	1.01	0.0835	-27.3125
1.8417	1.71	0.084	-27.2812
1.8526	1.69	0.0845	-27.4375
1.8635	1.94	0.085	-27.4375
1.8744	2.52	0.0855	-27.4688
1.8853	1.98	0.086	-27.375
1.8962	2.09	0.0865	-27.4375
1.9071	1.71	0.087	-27.5
1.918	1.66	0.0875	-27.6562
1.9289	1.75	0.088	-27.5938
1.9398	1.71	0.0885	-27.625
1.9507	1.26	0.089	-27.875
1.9616	1.58	0.0895	-27.5938
1.9725	1.61	0.09	-27.6875
1.9834	0.9	0.0905	-27.6875
1.9943	0.29	0.091	-27.6875
2.0052	-0.32	0.0915	-27.5938
2.0161	-0.3	0.092	-27.625
2.027	-0.53	0.0925	-27.7812
2.0379	-0.59	0.093	-27.6562
2.0488	-0.2	0.0935	-27.7188
2.0596	-0.56	0.094	-27.6562
2.0705	-0.67	0.0945	-27.6562
2.0814	-0.9	0.095	-27.625
2.0923	-0.76	0.0955	-27.7188
2.1032	-0.91	0.096	-27.4688
2.1141	-0.85	0.0965	-27.4688
2.125	-0.68	0.097	-27.5938
2.1359	-1.03	0.0975	-27.5625
2.1468	-1.14	0.098	-27.5
2.1577	-0.75	0.0985	-27.5938
2.1686	-0.65	0.099	-27.4375
2.1795	-0.81	0.0995	-27.6875
2.1904	-1.04	0.1	-27.625
2.2013	-0.72	0.1005	-27.4688
2.2122	-0.58	0.101	-27.375
2.2231	-0.88	0.1015	-27.5625
2.234	-1.02	0.102	-27.2812
2.2449	-0.85	0.1025	-27.5
2.2558	-0.82	0.103	-27.5938
2.2667	-1.1	0.1035	-27.4688
2.2776	-0.82	0.104	-27.3125
2.2885	-0.66	0.1045	-27.5
2.2994	-0.87	0.105	-27.375
2.3103	-0.38	0.1055	-27.2812
2.3212	-0.86	0.106	-27.375
2.3321	-0.61	0.1065	-27.25
2.343	-0.32	0.107	-27.4375
2.3539	-0.7	0.1075	-27.25
2.3648	-0.9	0.108	-27.25
2.3757	-1.45	0.1085	-27.375
2.3866	-0.39	0.109	-27.5
2.3975	-0.16	0.1095	-27.25
2.4084	-0.76	0.11	-27.5
2.4193	-0.84	0.1105	-27.5938
2.4302	-0.29	0.111	-27.4688
2.4411	-0.23	0.1115	-27.375
2.452	-0.42	0.112	-27.4688
2.4629	-0.2	0.1125	-27.3438
2.4738	-0.17	0.113	-27.3125
2.4847	-0.6	0.1135	-27.3438
2.4956	0.05	0.114	-27.3125
2.5065	-0.5	0.1145	-27.4688
2.5174	-0.41	0.115	-27.5625
2.5282	-0.2	0.1155	-27.5312
2.5391	-0.1	0.116	-27.4688
2.55	-0.36	0.1165	-27.3125
2.5609	-0.13	0.117	-27.4688
2.5718	-0.46	0.1175	-27.3438
2.5827	-0.08	0.118	-27.2188
2.5936	-0.58	0.1185	-27.3438
2.6045	-0.06	0.119	-27.4375
2.6154	0.08	0.1195	-27.3125
2.6263	-0.25	0.12	-27.2812
2.6372	-0.14	0.1205	-27.2812
2.6481	-0.03	0.121	-27.1562
2.659	-0.1	0.1215	-27.25
2.6699	-0.12	0.122	-27.125
2.6808	-0.06	0.1225	-27.125
2.6917	-0.46	0.123	-27.0938
2.7026	-0.67	0.1235	-27.2188
2.7135	-0.19	0.124	-27.0938
2.7244	0.03	0.1245	-26.9062
2.7353	-0.24	0.125	-26.8438
2.7462	0.16	0.1255	-27.0312
2.7571	-0.09	0.126	-26.875
2.768	0.18	0.1265	-26.8125
2.7789	-0.09	0.127	-26.7188
2.7898	0.16	0.1275	-26.5938
2.8007	-0.09	0.128	-26.8125
2.8116	-0.2	0.1285	-26.5938
2.8225	0.05	0.129	-26.8125
2.8334	-0.12	0.1295	-26.625
2.8443	-0.19	0.13	-26.75
2.8552	0.47	0.1305	-26.75
2.8661	0.18	0.131	-26.8438
2.877	-0.21	0.1315	-26.875
2.8879	-0.14	0.132	-26.7812
2.8988	-0.07	0.1325	-26.9062
2.9097	0.03	0.133	-26.7812
2.9206	0.04	0.1335	-26.8438
2.9315	0.11	0.134	-26.875
2.9424	-0.33	0.1345	-26.9062
2.9533	0.05	0.135	-26.8125
2.9642	0.07	0.1355	-26.8438
2.975	-0.26	0.136	-26.7812
2.9859	-0.41	0.1365	-26.7812
2.9968	-0.16	0.137	-26.75
3.0077	-0.17	0.1375	-26.7188
3.0186	0.11	0.138	-26.8125
3.0295	-0.22	0.1385	-26.8438
3.0404	0.31	0.139	-26.7812
3.0513	-0.06	0.1395	-26.9062
3.0622	-0.03	0.14	-26.9062
3.0731	-0.04	0.1405	-27.0938
3.084	-0.04	0.141	-26.9375
3.0949	0.11	0.1415	-26.875
3.1058	-0.34	0.142	-26.9375
3.1167	-0.09	0.1425	-27
3.1276	0.19	0.143	-26.9688
3.1385	0	0.1435	-27.1875
3.1494	0.39	0.144	-27.0625
3.1603	-0.09	0.1445	-27.1562
3.1712	0.05	0.145	-27.1562
3.1821	-0.22	0.1455	-27.1562
3.193	0.37	0.146	-27.25
3.2039	0.23	0.1465	-27.1562
3.2148	0.02	0.147	-27
3.2257	-0.02	0.1475	-27.125
3.2366	0.22	0.148	-27.25
3.2475	0	0.1485	-27.0938
3.2584	0.18	0.149	-27.125
3.2693	0.12	0.1495	-27.0625
3.2802	-0.48	0.15	-27.1562
3.2911	0.03	0.1505	-27.2188
3.302	0.45	0.151	-26.9062
3.3129	0.07	0.1515	-27
3.3238	-0.34	0.152	-26.9375
3.3347	-0.41	0.1525	-27.125
3.3456	-0.21	0.153	-26.9375
3.3565	-0.13	0.1535	-27.2188
3.3674	-0.23	0.154	-27.2812
3.3783	0.08	0.1545	-27.2188
3.3892	-0.33	0.155	-27.0938
3.4001	-0.49	0.1555	-27.2812
3.411	-0.21	0.156	-27.1875
3.4219	-0.12	0.1565	-27.1562
3.4328	-0.36	0.157	-27.125
3.4436	0.18	0.1575	-27.1562
3.4545	-0.05	0.158	-27.1875
3.4654	-0.23	0.1585	-27.2812
3.4763	-0.48	0.159	-27.1875
3.4872	-0.31	0.1595	-27.4375
3.4981	0.02	0.16	-27.375
3.509	-0.6	0.1605	-27.4688
3.5199	-0.58	0.161	-27.2812
3.5308	0.11	0.1615	-27.3125
3.5417	-0.07	0.162	-27.5
3.5526	0.6	0.1625	-27.4375
3.5635	-0.07	0.163	-27.4688
3.5744	0.27	0.1635	-27.5312
3.5853	0.19	0.164	-27.4375
3.5962	0.2	0.1645	-27.5938
3.6071	-0.11	0.165	-27.4375
3.618	-0.07	0.1655	-27.5
3.6289	-0.36	0.166	-27.625
3.6398	0.12	0.1665	-27.6562
3.6507	-0.47	0.167	-27.5
3.6616	-0.22	0.1675	-27.375
3.6725	0.26	0.168	-27.4688
3.6834	-0.42	0.1685	-27.4375
3.6943	-0.07	0.169	-27.3438
3.7052	-0.19	0.1695	-27.1562
3.7161	-0.03	0.17	-26.9688
3.727	0.39	0.1705	-27.0625
3.7379	-0.34	0.171	-27.0312
3.7488	0.14	0.1715	-26.9062
3.7597	-0.21	0.172	-27.0312
3.7706	-0.1	0.1725	-27.125
3.7815	0.31	0.173	-26.9688
3.7924	0.07	0.1735	-26.875
3.8033	1.08	0.174	-27
3.8142	0.28	0.1745	-26.9062
3.8251	0.54	0.175	-26.8438
3.836	0.12	0.1755	-26.8438
3.8469	-0.08	0.176	-26.8438
3.8578	0.35	0.1765	-26.6562
3.8687	-0.08	0.177	-26.8438
3.8796	0.25	0.1775	-26.75
3.8904	0.22	0.178	-26.8438
3.9013	-0.46	0.1785	-26.9375
3.9122	0.02	0.179	-26.875
3.9231	0.46	0.1795	-26.875
3.934	-0.19	0.18	-26.4375
3.9449	-0.21	0.1805	-26.5
3.9558	-0.06	0.181	-26.625
3.9667	0.06	0.1815	-26.5312
3.9776	0	0.182	-26.4062
3.9885	0	0.1825	-26.3125
3.9994	0.26	0.183	-26.5
4.0103	0.06	0.1835	-26.4375
4.0212	-0.32	0.184	-26.3438
4.0321	-0.13	0.1845	-26.4375
4.043	-0.01	0.185	-26.3438
4.0539	-0.03	0.1855	-26.25
4.0648	-0.16	0.186	-26.25
4.0757	-0.06	0.1865	-26.375
4.0866	0.48	0.187	-26.1562
4.0975	0.01	0.1875	-26.3125
4.1084	0.18	0.188	-26.25
4.1193	-0.21	0.1885	-26.25
4.1302	-0.21	0.189	-26.3438
4.1411	0.35	0.1895	-26.1562
4.152	0.27	0.19	-26.2188
4.1629	0.14	0.1905	-26.1875
4.1738	0.39	0.191	-26.3125
4.1847	0.04	0.1915	-26.2188
4.1956	0.05	0.192	-26.1875
4.2065	0.42	0.1925	-26.3125
4.2174	0.14	0.193	-26.2188
4.2283	0.4	0.1935	-26.2812
4.2392	-0.32	0.194	-26.25
4.2501	-0.02	0.1945	-26.25
4.261	-0.07	0.195	-26.2188
4.2719	0.36	0.1955	-26.3125
4.2828	0.34	0.196	-26.0625
4.2937	0.35	0.1965	-26.25
4.3046	0.57	0.197	-26.2812
4.3155	-0.21	0.1975	-26.1875
4.3264	0.1	0.198	-26.25
4.3373	0.09	0.1985	-26.0938
4.3482	0.31	0.199	-26.25
4.359	-0.02	0.1995	-26.3125
4.3699	-0.06	0.2	-26.1875
4.3808	0.17	0.2005	-26.1562
4.3917	0.25	0.201	-26.0938
4.4026	0.9	0.2015	-25.9375
4.4135	-0.05	0.202	-26.1562
4.4244	-0.25	0.2025	-26.1562
4.4353	0.1	0.203	-26.1562
4.4462	-0.06	0.2035	-26.0938
4.4571	-0.25	0.204	-26.125
4.468	-0.17	0.2045	-26.2188
4.4789	0.02	0.205	-26.2188
4.4898	0.02	0.2055	-26.2812
4.5007	0.31	0.206	-26.1562
4.5116	0.18	0.2065	-26.25
4.5225	-0.15	0.207	-26.3438
4.5334	0.39	0.2075	-26.125
4.5443	-0.18	0.208	-26.3438
4.5552	0.33	0.2085	-26.1562
4.5661	-0.34	0.209	-26.25
4.577	0.12	0.2095	-26.25
4.5879	0.09	0.21	-26.3125
4.5988	0.49	0.2105	-26.3125
4.6097	-0.1	0.211	-26.25
4.6206	0.23	0.2115	-26.25
4.6315	-0.25	0.212	-26.1875
4.6424	-0.25	0.2125	-26.25
4.6533	0.09	0.213	-26.0938
4.6642	-0.14	0.2135	-26.1562
4.6751	0.04	0.214	-26.3438
4.686	0.52	0.2145	-26.2188
4.6969	-0.11	0.215	-26.3438
4.7078	0.02	0.2155	-26.2812
4.7187	0.13	0.216	-26.5625
4.7296	-0.03	0.2165	-26.3125
4.7405	0.1	0.217	-26.2812
4.7514	-0.11	0.2175	-26.2812
4.7623	-0.32	0.218	-26.3125
4.7732	0.19	0.2185	-26.2812
4.7841	-0.16	0.219	-26.2812
4.795	0.23	0.2195	-26.375
4.8058	0.13	0.22	-26.3125
4.8167	-0.22	0.2205	-26.1875
4.8276	-0.22	0.221	-26.2812
4.8385	-0.05	0.2215	-26.25
4.8494	0.13	0.222	-26.4375
4.8603	0.48	0.2225	-26.3125
4.8712	0.32	0.223	-26.3438
4.8821	-0.03	0.2235	-26.4062
4.893	0.05	0.224	-26.3125
4.9039	-0.18	0.2245	-26.1875
4.9148	0.32	0.225	-26.125
4.9257	-0.08	0.2255	-25.875
4.9366	-0.41	0.226	-25.9062
4.9475	-0.52	0.2265	-25.8125
4.9584	0.33	0.227	-25.7812
4.9693	-0.23	0.2275	-25.6562
4.9802	0.29	0.228	-25.7812
4.9911	0.37	0.2285	-25.7188
5.002	0.44	0.229	-25.75
5.0129	-0.28	0.2295	-25.8438
5.0238	0.14	0.23	-25.6562
5.0347	0.03	0.2305	-25.7812
5.0456	0.12	0.231	-25.7188
5.0565	-0.05	0.2315	-25.8438
5.0674	-0.79	0.232	-25.7188
5.0783	-0.09	0.2325	-25.7812
5.0892	-0.31	0.233	-26.0625
5.1001	-0.13	0.2335	-26.125
5.111	-0.24	0.234	-26.125
5.1219	0.02	0.2345	-26.0312
5.1328	-0.12	0.235	-26.25
5.1437	-0.45	0.2355	-26.1875
5.1546	0.35	0.236	-26.2188
5.1655	0.26	0.2365	-26.1562
5.1764	-0.15	0.237	-26.25
5.1873	-0.27	0.2375	-26.2812
5.1982	-0.22	0.238	-26.2188
5.2091	-0.18	0.2385	-26.2188
5.22	-0.18	0.239	-26.25
5.2309	0.34	0.2395	-26.1875
5.2418	0.21	0.24	-26.25
5.2527	-0.17	0.2405	-26.1875
5.2636	0.69	0.241	-26.25
5.2744	-0.03	0.2415	-26.375
5.2853	-0.11	0.242	-26.25
5.2962	0.39	0.2425	-26.1875
5.3071	0.3	0.243	-26.2812
5.318	0.78	0.2435	-26.1875
5.3289	1.33	0.244	-26.25
5.3398	1.91	0.2445	-26.25
5.3507	2.32	0.245	-26.2188
5.3616	1.89	0.2455	-26.0625
5.3725	1.5	0.246	-26.25
5.3834	1.67	0.2465	-26.25
5.3943	1.64	0.247	-26.1875
5.4052	1.72	0.2475	-26.125
5.4161	1.54	0.248	-26.2188
5.427	1.31	0.2485	-26.1562
5.4379	0.78	0.249	-26.1562
5.4488	1.24	0.2495	-26.0625
5.4597	0.25	0.25	-26.0312
5.4706	-0.6	0.2505	-26.25
5.4815	-0.43	0.251	-26.125
5.4924	-0.32	0.2515	-25.9375
5.5033	-0.43	0.252	-25.9062
5.5142	-0.68	0.2525	-25.9375
5.5251	-0.1	0.253	-26.0312
5.536	-0.12	0.2535	-25.9375
5.5469	-0.88	0.254	-25.9688
5.5578	-0.28	0.2545	-26.0312
5.5687	-0.72	0.255	-25.9375
5.5796	-0.87	0.2555	-26.0312
5.5905	-0.84	0.256	-25.8438
5.6014	-0.55	0.2565	-25.875
5.6123	-0.71	0.257	-25.8438
5.6232	-0.31	0.2575	-25.8125
5.6341	-0.66	0.258	-25.875
5.645	-0.27	0.2585	-25.875
5.6559	-0.05	0.259	-25.9062
5.6668	-0.15	0.2595	-26.0938
5.6777	-0.28	0.26	-26.0938
5.6886	-0.26	0.2605	-25.9688
5.6995	-0.11	0.261	-26.125
5.7104	-0.37	0.2615	-25.8438
5.7212	0.21	0.262	-26.0938
5.7321	-0.29	0.2625	-26.0938
5.743	-0.5	0.263	-26.0938
5.7539	-0.15	0.2635	-26.1875
5.7648	-0.17	0.264	-26.0312
5.7757	-0.66	0.2645	-26.25
5.7866	-0.19	0.265	-26.1562
5.7975	-0.36	0.2655	-26.1562
5.8084	-0.42	0.266	-26.1875
5.8193	-0.4	0.2665	-26.0625
5.8302	-0.55	0.267	-25.9688
5.8411	-0.77	0.2675	-25.9062
5.852	-0.4	0.268	-25.875
5.8629	-0.92	0.2685	-25.9375
5.8738	-0.14	0.269	-25.9375
5.8847	-0.36	0.2695	-26.0312
5.8956	-0.1	0.27	-26.0625
5.9065	0.22	0.2705	-26.0312
5.9174	0.02	0.271	-25.9688
5.9283	0.33	0.2715	-26.0938
5.9392	-0.1	0.272	-25.875
5.9501	0.33	0.2725	-25.8438
5.961	0.37	0.273	-25.7812
5.9719	0.29	0.2735	-25.7812
5.9828	-0.16	0.274	-25.8438
5.9937	-0.17	0.2745	-25.8125
6.0046	-0.51	0.275	-25.875
6.0155	-0.17	0.2755	-26.0312
6.0264	-0.85	0.276	-25.9688
6.0373	-0.33	0.2765	-25.8438
6.0482	-0.25	0.277	-25.9375
6.0591	-0.37	0.2775	-26.0312
6.07	-0.18	0.278	-25.8125
6.0809	-0.06	0.2785	-26.0312
6.0918	-0.37	0.279	-25.7812
6.1027	-0.14	0.2795	-25.75
6.1136	0.06	0.28	-25.7188
6.1245	-0.3	0.2805	-25.5938
6.1354	-0.33	0.281	-25.5625
6.1463	-0.29	0.2815	-25.5938
6.1572	0.08	0.282	-25.6562
6.1681	-0.04	0.2825	-25.5312
6.179	0.05	0.283	-25.5
6.1898	-0.27	0.2835	-25.375
6.2007	0.04	0.284	-25.375
6.2116	-0.6	0.2845	-25.4688
6.2225	-0.53	0.285	-25.4688
6.2334	-0.09	0.2855	-25.5
6.2443	-0.55	0.286	-25.5312
6.2552	-0.23	0.2865	-25.5312
6.2661	-0.2	0.287	-25.4062
6.277	0.28	0.2875	-25.5312
6.2879	-0.03	0.288	-25.5625
6.2988	-0.57	0.2885	-25.375
6.3097	-0.59	0.289	-25.375
6.3206	-0.12	0.2895	-25.0312
6.3315	-0.39	0.29	-25.125
6.3424	0.27	0.2905	-25.125
6.3533	-0.36	0.291	-24.9688
6.3642	-0.12	0.2915	-25.0312
6.3751	0.26	0.292	-25
6.386	0.11	0.2925	-25.0312
6.3969	-0.44	0.293	-25.0938
6.4078	-0.43	0.2935	-24.8125
6.4187	-0.2	0.294	-24.9062
6.4296	-0.28	0.2945	-25
6.4405	-0.38	0.295	-24.9375
6.4514	-0.09	0.2955	-24.9688
6.4623	0.18	0.296	-25.0625
6.4732	0.28	0.2965	-25
6.4841	-0.29	0.297	-24.8125
6.495	0.03	0.2975	-24.8125
6.5059	-0.4	0.298	-24.9375
6.5168	-0.23	0.2985	-24.6562
6.5277	-0.52	0.299	-24.7188
6.5386	-0.89	0.2995	-24.8125
6.5495	-0.44	0.3	-24.7188
6.5604	0.28	0.3005	-24.5625
6.5713	0.07	0.301	-24.625
6.5822	-0.45	0.3015	-24.625
6.5931	-0.16	0.302	-24.7188
6.604	-0.12	0.3025	-24.625
6.6149	-0.23	0.303	-24.7188
6.6258	0.13	0.3035	-24.5625
6.6366	0.18	0.304	-24.5312
6.6475	-0.35	0.3045	-24.5625
6.6584	-0.12	0.305	-24.4062
6.6693	-0.51	0.3055	-24.75
6.6802	-0.34	0.306	-24.5312
6.6911	-0.38	0.3065	-24.6875
6.702	-0.49	0.307	-24.6562
6.7129	-0.47	0.3075	-24.6562
6.7238	-0.27	0.308	-24.6875
6.7347	0.14	0.3085	-24.75
6.7456	-0.34	0.309	-24.75
6.7565	-0.77	0.3095	-24.4688
6.7674	-0.13	0.31	-24.625
6.7783	-0.51	0.3105	-24.4688
6.7892	-0.22	0.311	-24.5
6.8001	-0.36	0.3115	-24.4375
6.811	-0.31	0.312	-24.4062
6.8219	-0.57	0.3125	-24.4062
6.8328	-0.37	0.313	-24.3438
6.8437	-0.15	0.3135	-24.4375
6.8546	-0.51	0.314	-24.5625
6.8655	-0.77	0.3145	-24.5312
6.8764	-0.27	0.315	-24.625
6.8873	-0.23	0.3155	-24.375
6.8982	-0.52	0.316	-24.5625
6.9091	-0.15	0.3165	-24.375
6.92	-0.57	0.317	-24.4688
6.9309	-0.5	0.3175	-24.5625
6.9418	-0.71	0.318	-24.25
6.9527	0.13	0.3185	-24.3438
6.9636	-0.1	0.319	-24.25
6.9745	-0.2	0.3195	-24.25
6.9854	-0.53	0.32	-24.4688
6.9963	-0.55	0.3205	-24.4375
7.0072	-0.59	0.321	-24.5
7.0181	-0.24	0.3215	-24.5625
7.029	-0.31	0.322	-24.7188
7.0399	-0.16	0.3225	-24.5312
7.0508	-0.29	0.323	-24.6875
7.0617	-0.61	0.3235	-24.4688
7.0726	-0.88	0.324	-24.3438
7.0835	-0.36	0.3245	-24.5
7.0944	-0.17	0.325	-24.4062
7.1052	-0.37	0.3255	-24.375
7.1161	-0.23	0.326	-24.3125
7.127	-0.52	0.3265	-24.4062
7.1379	-0.39	0.327	-24.4688
7.1488	-0.11	0.3275	-24.5625
7.1597	-0.35	0.328	-24.4062
7.1706	-0.43	0.3285	-24.3125
7.1815	-0.19	0.329	-24.1875
7.1924	0.27	0.3295	-24.0312
7.2033	-0.13	0.33	-23.9375
7.2142	0.06	0.3305	-24.0625
7.2251	-0.2	0.331	-23.8438
7.236	-0.6	0.3315	-23.75
7.2469	-0.03	0.332	-23.75
7.2578	0.05	0.3325	-23.7188
7.2687	-0.1	0.333	-23.8125
7.2796	-0.39	0.3335	-23.8125
7.2905	-0.16	0.334	-23.625
7.3014	-0.77	0.3345	-23.875
7.3123	-0.58	0.335	-23.7188
7.3232	0.03	0.3355	-23.875
7.3341	-0.15	0.336	-23.9688
7.345	0.24	0.3365	-23.9688
7.3559	-0.35	0.337	-23.875
7.3668	-0.42	0.3375	-23.7812
7.3777	0.06	0.338	-24
7.3886	-0.18	0.3385	-24.0312
7.3995	-0.41	0.339	-23.8438
7.4104	-0.16	0.3395	-24.1875
7.4213	-0.21	0.34	-24.25
7.4322	-0.06	0.3405	-24.1875
7.4431	-0.15	0.341	-24
7.454	-0.42	0.3415	-24.2188
7.4649	-0.45	0.342	-24.4375
7.4758	-0.26	0.3425	-24.3438
7.4867	-0.56	0.343	-24.2812
7.4976	-0.13	0.3435	-24.3438
7.5085	-0.2	0.344	-24.3125
7.5194	-0.45	0.3445	-24.4062
7.5303	0.02	0.345	-24.4062
7.5412	-0.1	0.3455	-24.5312
7.552	-0.47	0.346	-24.5
7.5629	-0.28	0.3465	-24.4375
7.5738	0.04	0.347	-24.5312
7.5847	-0.73	0.3475	-24.4062
7.5956	-0.5	0.348	-24.5625
7.6065	0.13	0.3485	-24.7188
7.6174	-0.3	0.349	-24.6562
7.6283	-0.28	0.3495	-24.5
7.6392	-0.43	0.35	-24.6875
7.6501	-0.42	0.3505	-24.6562
7.661	-0.13	0.351	-24.7812
7.6719	-0.3	0.3515	-24.75
7.6828	-0.57	0.352	-24.6562
7.6937	-0.29	0.3525	-24.7812
7.7046	-0.21	0.353	-24.9375
7.7155	-0.51	0.3535	-24.7812
7.7264	-0.09	0.354	-24.8438
7.7373	-0.26	0.3545	-24.9062
7.7482	0.02	0.355	-24.8125
7.7591	-0.75	0.3555	-24.8125
7.77	-0.35	0.356	-24.9688
7.7809	-0.26	0.3565	-24.9375
7.7918	-0.09	0.357	-25
7.8027	-0.1	0.3575	-24.9375
7.8136	-0.12	0.358	-24.8125
7.8245	0.21	0.3585	-24.875
7.8354	-0.24	0.359	-24.8438
7.8463	-0.34	0.3595	-24.9062
7.8572	0.07	0.36	-24.9062
7.8681	-0.52	0.3605	-25.0312
7.879	0.11	0.361	-25.1562
7.8899	0.2	0.3615	-25.0625
7.9008	-0.21	0.362	-25.0625
7.9117	0.17	0.3625	-25.3438
7.9226	-0.04	0.363	-25.1875
7.9335	0.42	0.3635	-25.2188
7.9444	0.28	0.364	-25.125
7.9553	0.06	0.3645	-24.9062
7.9662	0.11	0.365	-24.9062
7.9771	0.02	0.3655	-24.9375
7.988	0.21	0.366	-25.0312
7.9989	0.42	0.3665	-25
8.0098	0.15	0.367	-25.0312
8.0206	-0.05	0.3675	-25
8.0315	-0.34	0.368	-25
8.0424	-0.09	0.3685	-25
8.0533	-0.29	0.369	-25.0625
8.0642	0.2	0.3695	-25
8.0751	-0.04	0.37	-25.0312
8.086	0.22	0.3705	-24.9688
8.0969	0.16	0.371	-25.2812
8.1078	0.73	0.3715	-25.125
8.1187	0.55	0.372	-25.2188
8.1296	-0.05	0.3725	-25.125
8.1405	0.14	0.373	-25.1875
8.1514	0.66	0.3735	-25.25
8.1623	0.26	0.374	-25.2812
8.1732	0.27	0.3745	-25.5
8.1841	0.39	0.375	-25.4062
8.195	0.86	0.3755	-25.5625
8.2059	0.19	0.376	-25.6562
8.2168	0.35	0.3765	-25.5938
8.2277	0.22	0.377	-25.5312
8.2386	0.32	0.3775	-25.5312
8.2495	0.37	0.378	-25.5625
8.2604	-0.13	0.3785	-25.5312
8.2713	0.36	0.379	-25.5
8.2822	0.27	0.3795	-25.5312
8.2931	-0.27	0.38	-25.7188
8.304	0.42	0.3805	-25.6562
8.3149	0.2	0.381	-25.5938
8.3258	0.34	0.3815	-25.5
8.3367	0.32	0.382	-25.7188
8.3476	0.41	0.3825	-25.7188
8.3585	0.71	0.383	-25.6875
8.3694	0.54	0.3835	-25.625
8.3803	0.77	0.384	-25.5
8.3912	1.55	0.3845	-25.625
8.4021	1.92	0.385	-25.5625
8.413	2.16	0.3855	-25.6875
8.4239	1.92	0.386	-25.5625
8.4348	1.98	0.3865	-25.6562
8.4457	1.87	0.387	-25.75
8.4566	1.71	0.3875	-25.7188
8.4674	1.58	0.388	-25.875
8.4783	1.76	0.3885	-25.7812
8.4892	1.57	0.389	-25.8125
8.5001	1.37	0.3895	-25.7812
8.511	1.43	0.39	-25.8125
8.5219	1.45	0.3905	-25.7812
8.5328	1.43	0.391	-25.9375
8.5437	0.26	0.3915	-26.0312
8.5546	-0.23	0.392	-25.9062
8.5655	-0.03	0.3925	-26.0312
8.5764	0.04	0.393	-26.0938
8.5873	-0.3	0.3935	-26.0312
8.5982	-0.19	0.394	-25.875
8.6091	-0.26	0.3945	-25.9062
8.62	-0.33	0.395	-25.9688
8.6309	-0.57	0.3955	-26.0312
8.6418	-0.29	0.396	-26.0312
8.6527	-0.55	0.3965	-25.9375
8.6636	-0.35	0.397	-26.0938
8.6745	-0.37	0.3975	-26.0938
8.6854	-0.59	0.398	-25.9688
8.6963	-0.28	0.3985	-26.1562
8.7072	-0.43	0.399	-25.875
8.7181	-0.62	0.3995	-25.9688
8.729	-0.57	0.4	-26.0625
8.7399	-0.13	0.4005	-26.0312
8.7508	-0.27	0.401	-26.125
8.7617	-0.46	0.4015	-26.0938
8.7726	-0.4	0.402	-26.1562
8.7835	-0.28	0.4025	-26.1875
8.7944	-0.35	0.403	-25.9688
8.8053	-0.19	0.4035	-25.9688
8.8162	-0.47	0.404	-26.0625
8.8271	-0.58	0.4045	-26.0938
8.838	-0.32	0.405	-26.125
8.8489	-0.07	0.4055	-26.0625
8.8598	-0.18	0.406	-26.0938
8.8707	0.97	0.4065	-25.9062
8.8816	0.77	0.407	-26.0625
8.8925	1.27	0.4075	-26.1562
8.9034	0.76	0.408	-25.9062
8.9143	0.16	0.4085	-25.8125
8.9252	-0.17	0.409	-25.875
8.936	-0.16	0.4095	-25.7812
8.9469	0.16	0.41	-25.8438
8.9578	0.1	0.4105	-25.9062
8.9687	-0.26	0.411	-25.9062
8.9796	0.04	0.4115	-26.0625
8.9905	-0.18	0.412	-26.25
9.0014	-0.21	0.4125	-26.1562
9.0123	-0.2	0.413	-26.0625
9.0232	-0.41	0.4135	-26.3438
9.0341	-0.47	0.414	-26.1562
9.045	-0.16	0.4145	-25.9062
9.0559	0	0.415	-25.8438
9.0668	-0.56	0.4155	-25.9688
9.0777	-0.36	0.416	-26.125
9.0886	-0.33	0.4165	-25.9688
9.0995	-0.83	0.417	-26.0312
9.1104	-0.45	0.4175	-26.2188
9.1213	-0.37	0.418	-26.1562
9.1322	-0.14	0.4185	-26.0625
9.1431	-0.18	0.419	-25.8438
9.154	-0.44	0.4195	-25.8438
9.1649	-0.23	0.42	-25.8438
9.1758	-0.34	0.4205	-25.75
9.1867	-0.43	0.421	-25.8125
9.1976	-0.18	0.4215	-25.8438
9.2085	-0.43	0.422	-25.75
9.2194	-0.33	0.4225	-25.9062
9.2303	-0.04	0.423	-25.6562
9.2412	0.05	0.4235	-25.8125
9.2521	-0.14	0.424	-25.625
9.263	-0.25	0.4245	-25.625
9.2739	0.07	0.425	-25.7188
9.2848	-0.26	0.4255	-25.5625
9.2957	-0.51	0.426	-25.6875
9.3066	-0.38	0.4265	-25.875
9.3175	0.25	0.427	-25.7812
9.3284	-0.32	0.4275	-25.9375
9.3393	0.18	0.428	-25.8438
9.3502	0	0.4285	-25.8438
9.3611	-0.04	0.429	-25.875
9.372	-0.05	0.4295	-25.9375
9.3828	-0.17	0.43	-25.875
9.3937	0.1	0.4305	-25.9062
9.4046	0.15	0.431	-26.0625
9.4155	0.12	0.4315	-25.875
9.4264	0.1	0.432	-26.0625
9.4373	0.26	0.4325	-25.875
9.4482	-0.35	0.433	-25.8438
9.4591	-0.11	0.4335	-25.7188
9.47	0.11	0.434	-25.875
9.4809	-0.19	0.4345	-25.75
9.4918	-0.44	0.435	-25.7812
9.5027	-0.28	0.4355	-25.6875
9.5136	-0.01	0.436	-25.75
9.5245	-0.22	0.4365	-25.875
9.5354	-0.25	0.437	-25.875
9.5463	-0.48	0.4375	-25.6875
9.5572	0.41	0.438	-25.8438
9.5681	-0.21	0.4385	-25.5938
9.579	0.24	0.439	-25.6875
9.5899	0.44	0.4395	-25.8438
9.6008	0.42	0.44	-25.7188
9.6117	0.18	0.4405	-25.8438
9.6226	-0.21	0.441	-25.7188
9.6335	0.23	0.4415	-25.6562
9.6444	0.22	0.442	-25.6875
9.6553	0.33	0.4425	-25.7812
9.6662	0.51	0.443	-25.875
9.6771	0.46	0.4435	-25.7188
9.688	0.2	0.444	-25.5625
9.6989	0.19	0.4445	-25.4062
9.7098	0.11	0.445	-25.5312
9.7207	0.36	0.4455	-25.5
9.7316	-0.18	0.446	-25.5312
9.7425	-0.22	0.4465	-25.3438
9.7534	-0.14	0.447	-25.4688
9.7643	0.2	0.4475	-25.25
9.7752	-0.13	0.448	-25.375
9.7861	0.29	0.4485	-25.4062
9.797	-0.34	0.449	-25.3438
9.8079	0.04	0.4495	-25.375
9.8188	0.22	0.45	-25.2812
9.8297	0.46	0.4505	-25.1875
9.8406	0.43	0.451	-25.3438
9.8514	-0.18	0.4515	-25.2188
9.8623	0.21	0.452	-25.2188
9.8732	0.02	0.4525	-25.25
9.8841	0.17	0.453	-25.3438
9.895	0.13	0.4535	-25.1562
9.9059	0.17	0.454	-25.125
9.9168	-0.01	0.4545	-25.125
9.9277	-0.13	0.455	-25.125
9.9386	-0.33	0.4555	-24.9375
9.9495	0.02	0.456	-25.0625
9.9604	0.03	0.4565	-25.0312
9.9713	0.1	0.457	-25
9.9822	0.59	0.4575	-25.0625
9.9931	0.41	0.458	-25.0625
10.004	0.77	0.4585	-25.0312
10.0149	1.26	0.459	-24.75
10.0258	1.54	0.4595	-24.7812
10.0367	2.18	0.46	-24.625
10.0476	2.39	0.4605	-24.7188
10.0585	1.81	0.461	-24.5
10.0694	1.41	0.4615	-24.5
10.0803	1.49	0.462	-24.4688
10.0912	1.45	0.4625	-24.3438
10.1021	1.29	0.463	-24.4062
10.113	0.98	0.4635	-24.4375
10.1239	0.86	0.464	-24.2812
10.1348	0.09	0.4645	-24.3125
10.1457	-0.16	0.465	-24.1875
10.1566	-0.29	0.4655	-24.3438
10.1675	-0.37	0.466	-24.2188
10.1784	-0.4	0.4665	-24.1875
10.1893	-0.54	0.467	-24.25
10.2002	-0.28	0.4675	-24.25
10.2111	-0.75	0.468	-24.3438
10.222	-0.32	0.4685	-24.2812
10.2329	-0.16	0.469	-24.5625
10.2438	-0.66	0.4695	-24.25
10.2547	-0.4	0.47	-24.4062
10.2656	-0.45	0.4705	-24.4688
10.2765	-0.96	0.471	-24.3125
10.2874	-0.48	0.4715	-24.375
10.2982	-0.46	0.472	-24.4375
10.3091	-0.23	0.4725	-24.375
10.32	-0.6	0.473	-24.3438
10.3309	-0.66	0.4735	-24.3125
10.3418	-0.22	0.474	-24.5625
10.3527	-0.42	0.4745	-24.3438
10.3636	-0.51	0.475	-24.5
10.3745	-0.8	0.4755	-24.3438
10.3854	-0.7	0.476	-24.3125
10.3963	-0.44	0.4765	-24.4688
10.4072	-0.63	0.477	-24.4688
10.4181	-0.26	0.4775	-24.4062
10.429	-0.18	0.478	-24.4062
10.4399	-0.29	0.4785	-24.4688
10.4508	-0.45	0.479	-24.5312
10.4617	-0.56	0.4795	-24.5625
10.4726	-0.44	0.48	-24.4688
10.4835	-0.57	0.4805	-24.5
10.4944	-0.69	0.481	-24.5312
10.5053	-0.22	0.4815	-24.375
10.5162	-1.08	0.482	-24.25
10.5271	-0.21	0.4825	-24.1875
10.538	-0.14	0.483	-24.125
10.5489	-0.28	0.4835	-24
10.5598	-0.46	0.484	-24
10.5707	-0.1	0.4845	-23.9688
10.5816	-0.71	0.485	-23.9688
10.5925	-0.4	0.4855	-24.1562
10.6034	-0.58	0.486	-24.0625
10.6143	-0.28	0.4865	-23.9375
10.6252	0.08	0.487	-24.0312
10.6361	-0.56	0.4875	-24.0938
10.647	-0.37	0.488	-24.125
10.6579	-0.7	0.4885	-23.9688
10.6688	-0.74	0.489	-24.0312
10.6797	-0.43	0.4895	-24.0625
10.6906	-0.82	0.49	-23.875
10.7015	-0.35	0.4905	-23.9688
10.7124	-0.52	0.491	-24.0312
10.7233	-0.64	0.4915	-24.0625
10.7342	-0.79	0.492	-24
10.7451	-0.24	0.4925	-24.2812
10.756	-0.57	0.493	-24.125
10.7668	-0.3	0.4935	-24.0312
10.7777	-0.59	0.494	-24.0312
10.7886	-0.08	0.4945	-23.9375
10.7995	-0.1	0.495	-23.9375
10.8104	0.31	0.4955	-23.875
10.8213	-0.09	0.496	-23.9375
10.8322	-0.22	0.4965	-24.125
10.8431	-0.34	0.497	-23.75
10.854	-0.3	0.4975	-23.8125
10.8649	-0.31	0.498	-23.75
10.8758	-0.58	0.4985	-23.7812
10.8867	-0.57	0.499	-23.9375
10.8976	-0.03	0.4995	-23.7188
10.9085	-0.47	0.5	-23.8125
10.9194	-0.11	0.5005	-23.5625
10.9303	-0.17	0.501	-23.625
10.9412	-0.3	0.5015	-23.75
10.9521	-0.23	0.502	-23.8125
10.963	0.03	0.5025	-23.7812
10.9739	-0.22	0.503	-23.875
10.9848	-0.47	0.5035	-23.7812
10.9957	-0.36	0.504	-23.8438
11.0066	0.01	0.5045	-23.6875
11.0175	0.06	0.505	-23.8438
11.0284	0.34	0.5055	-23.5938
11.0393	-0.28	0.506	-23.5938
11.0502	-0.5	0.5065	-23.5312
11.0611	-0.47	0.507	-23.6875
11.072	-0.21	0.5075	-23.8438
11.0829	-0.22	0.508	-24
11.0938	-0.5	0.5085	-23.875
11.1047	-0.38	0.509	-23.9688
11.1156	-0.57	0.5095	-23.8438
11.1265	-0.14	0.51	-23.7812
11.1374	-0.26	0.5105	-23.7188
11.1483	0.41	0.511	-23.9375
11.1592	-0.01	0.5115	-23.5312
11.1701	-0.08	0.512	-23.4062
11.181	0.01	0.5125	-23.2812
11.1919	-0.19	0.513	-23.5312
11.2028	0.12	0.5135	-23.125
11.2136	0.01	0.514	-23.3125
11.2245	0.09	0.5145	-23.3438
11.2354	-0.54	0.515	-23.25
11.2463	0.28	0.5155	-23.3125
11.2572	0.33	0.516	-23.2812
11.2681	0.36	0.5165	-23.25
11.279	-0.19	0.517	-23.2812
11.2899	0.64	0.5175	-23.125
11.3008	0.31	0.518	-23.25
11.3117	0.54	0.5185	-22.9375
11.3226	0.08	0.519	-23.0938
11.3335	0.35	0.5195	-23
11.3444	0.21	0.52	-23
11.3553	0.39	0.5205	-23.0625
11.3662	0.63	0.521	-23
11.3771	0.47	0.5215	-22.875
11.388	-0.17	0.522	-22.875
11.3989	0.56	0.5225	-22.8438
11.4098	0.29	0.523	-22.6875
11.4207	0	0.5235	-22.7812
11.4316	0.17	0.524	-22.75
11.4425	0.04	0.5245	-22.7812
11.4534	0.37	0.525	-22.625
11.4643	0.31	0.5255	-22.625
11.4752	0.18	0.526	-22.375
11.4861	0.57	0.5265	-22.5312
11.497	0.07	0.527	-22.3438
11.5079	0.3	0.5275	-22.4688
11.5188	0.23	0.528	-22.3125
11.5297	0.67	0.5285	-22.3438
11.5406	0.25	0.529	-22.1875
11.5515	0.02	0.5295	-22.0625
11.5624	0.49	0.53	-21.9375
11.5733	0.58	0.5305	-21.9688
11.5842	0.2	0.531	-21.7188
11.5951	-0.02	0.5315	-21.8438
11.606	0.07	0.532	-21.8125
11.6169	0.35	0.5325	-21.8438
11.6278	-0.1	0.533	-21.6875
11.6387	-0.08	0.5335	-21.75
11.6496	-0.03	0.534	-21.8125
11.6605	0.05	0.5345	-21.9062
11.6714	0.07	0.535	-21.75
11.6822	0.05	0.5355	-21.875
11.6931	-0.25	0.536	-22
11.704	-0.1	0.5365	-22.0938
11.7149	-0.05	0.537	-22
11.7258	-0.1	0.5375	-21.875
11.7367	0.19	0.538	-22.0938
11.7476	0.97	0.5385	-22.1562
11.7585	-0.1	0.539	-22.125
11.7694	-0.13	0.5395	-22.3125
11.7803	0.26	0.54	-22.3125
11.7912	0.39	0.5405	-22.4062
11.8021	-0.36	0.541	-22.3438
11.813	0.38	0.5415	-22.375
11.8239	0.49	0.542	-22.375
11.8348	0.18	0.5425	-22.1875
11.8457	0.25	0.543	-22.3438
11.8566	0.64	0.5435	-22.0625
11.8675	0.44	0.544	-22.25
11.8784	0.34	0.5445	-22.0938
11.8893	0.36	0.545	-22.125
11.9002	0.77	0.5455	-22.0625
11.9111	0.57	0.546	-22.1562
11.922	-0.04	0.5465	-21.9375
11.9329	0.75	0.547	-21.9375
11.9438	0.4	0.5475	-22.0938
11.9547	0.95	0.548	-22
11.9656	0.35	0.5485	-22
11.9765	-0.08	0.549	-22.0312
11.9874	0.42	0.5495	-22.0625
11.9983	-0.47	0.55	-21.9062
12.0092	0.05	0.5505	-21.8438
12.0201	-0.09	0.551	-22.0625
12.031	0.09	0.5515	-21.9062
12.0419	0.3	0.552	-21.9688
12.0528	0.03	0.5525	-22.0312
12.0637	-0.02	0.553	-21.9062
12.0746	0.06	0.5535	-22
12.0855	-0.13	0.554	-21.9375
12.0964	0.5	0.5545	-21.9688
12.1073	0.2	0.555	-21.9375
12.1182	0.42	0.5555	-21.875
12.129	-0.14	0.556	-21.6875
12.1399	0.1	0.5565	-21.75
12.1508	0.2	0.557	-21.6875
12.1617	0.46	0.5575	-21.6875
12.1726	0.43	0.558	-21.5625
12.1835	0.47	0.5585	-21.625
12.1944	0.44	0.559	-21.5312
12.2053	0.41	0.5595	-21.625
12.2162	1.25	0.56	-21.6562
12.2271	0.42	0.5605	-21.6562
12.238	0.61	0.561	-21.875
12.2489	0.37	0.5615	-21.7188
12.2598	0.35	0.562	-21.8438
12.2707	0.78	0.5625	-21.75
12.2816	0.33	0.563	-21.625
12.2925	0.78	0.5635	-21.6562
12.3034	0.49	0.564	-21.5625
12.3143	0.42	0.5645	-21.4688
12.3252	0.85	0.565	-21.4688
12.3361	0.26	0.5655	-21.375
12.347	0.63	0.566	-21.4688
12.3579	0.06	0.5665	-21.5
12.3688	0.4	0.567	-21.625
12.3797	0.18	0.5675	-21.5
12.3906	0.22	0.568	-21.2812
12.4015	0.17	0.5685	-21.6562
12.4124	0.39	0.569	-21.4375
12.4233	0.09	0.5695	-21.625
12.4342	0.39	0.57	-21.5312
12.4451	0.35	0.5705	-21.375
12.456	0.19	0.571	-21.3438
12.4669	0.08	0.5715	-21.2812
12.4778	0.25	0.572	-21.1875
12.4887	0.17	0.5725	-21.1562
12.4996	0.22	0.573	-21.125
12.5105	0.21	0.5735	-21.0312
12.5214	0.29	0.574	-20.9375
12.5323	-0.33	0.5745	-21.0312
12.5432	0.06	0.575	-21.0312
12.5541	0.15	0.5755	-21.1562
12.565	-0.13	0.576	-20.8125
12.5759	0.17	0.5765	-20.9062
12.5868	0.3	0.577	-20.75
12.5976	0.09	0.5775	-20.6875
12.6085	0	0.578	-20.9062
12.6194	-0.51	0.5785	-20.7812
12.6303	-0.15	0.579	-20.9688
12.6412	0.17	0.5795	-20.8438
12.6521	-0.07	0.58	-20.9688
12.663	-0.3	0.5805	-20.9375
12.6739	0.48	0.581	-20.9688
12.6848	-0.12	0.5815	-20.9062
12.6957	-0.23	0.582	-20.75
12.7066	-0.06	0.5825	-20.8438
12.7175	0.03	0.583	-20.7188
12.7284	0.18	0.5835	-20.6562
12.7393	0.49	0.584	-20.6562
12.7502	0.34	0.5845	-20.625
12.7611	-0.11	0.585	-20.7188
12.772	0.17	0.5855	-20.6562
12.7829	-0.19	0.586	-20.5938
12.7938	0.43	0.5865	-20.625
12.8047	-0.21	0.587	-20.625
12.8156	0.21	0.5875	-20.7812
12.8265	0.33	0.588	-20.5625
12.8374	0.2	0.5885	-20.7812
12.8483	0.03	0.589	-20.5312
12.8592	-0.02	0.5895	-20.4375
12.8701	-0.17	0.59	-20.5312
12.881	0.03	0.5905	-20.3438
12.8919	-0.09	0.591	-20.3125
12.9028	-0.07	0.5915	-20.3438
12.9137	0.11	0.592	-20.5312
12.9246	-0.18	0.5925	-20.5
12.9355	-0.22	0.593	-20.5
12.9464	-0.15	0.5935	-20.5312
12.9573	-0.17	0.594	-20.5938
12.9682	-0.01	0.5945	-20.5
12.9791	0.29	0.595	-20.5312
12.99	0.47	0.5955	-20.5625
13.0009	0.04	0.596	-20.4375
13.0118	0.52	0.5965	-20.5
13.0227	-0.02	0.597	-20.5312
13.0336	0.21	0.5975	-20.3125
13.0444	0.55	0.598	-20.4375
13.0553	0.4	0.5985	-20.5625
13.0662	0.24	0.599	-20.6562
13.0771	0.09	0.5995	-20.625
13.088	-0.02	0.6	-20.75
13.0989	0.18	0.6005	-20.7188
13.1098	-0.05	0.601	-20.6875
13.1207	-0.29	0.6015	-20.875
13.1316	-0.18	0.602	-20.5938
13.1425	-0.06	0.6025	-20.7188
13.1534	0.42	0.603	-20.7812
13.1643	0.03	0.6035	-20.75
13.1752	0.11	0.604	-20.5938
13.1861	-0.27	0.6045	-20.8438
13.197	0.32	0.605	-20.6875
13.2079	-0.13	0.6055	-20.875
13.2188	0.41	0.606	-20.6562
13.2297	-0.2	0.6065	-20.6875
13.2406	-0.19	0.607	-20.9688
13.2515	-0.24	0.6075	-20.9375
13.2624	0.02	0.608	-20.75
13.2733	0.21	0.6085	-20.8125
13.2842	0.2	0.609	-20.875
13.2951	0.27	0.6095	-20.9062
13.306	-0.02	0.61	-20.7188
13.3169	-0.14	0.6105	-20.5625
13.3278	-0.07	0.611	-20.6875
13.3387	-0.21	0.6115	-20.6875
13.3496	0	0.612	-20.5938
13.3605	-0.22	0.6125	-20.6875
13.3714	-0.05	0.613	-20.6875
13.3823	0.04	0.6135	-20.6562
13.3932	0.61	0.614	-20.6875
13.4041	-0.14	0.6145	-20.7188
13.415	0.05	0.615	-20.6562
13.4259	-0.3	0.6155	-20.7812
13.4368	0.09	0.616	-20.6875
13.4477	0.22	0.6165	-20.6562
13.4586	-0.42	0.617	-20.625
13.4695	-0.05	0.6175	-20.7188
13.4804	-0.23	0.618	-20.6562
13.4913	-0.19	0.6185	-20.5
13.5022	0.08	0.619	-20.75
13.513	0.06	0.6195	-20.75
13.5239	0.32	0.62	-21.0312
13.5348	-0.48	0.6205	-20.75
13.5457	0.02	0.621	-20.75
13.5566	-0.27	0.6215	-20.8125
13.5675	-0.01	0.622	-20.8125
13.5784	0.03	0.6225	-20.8438
13.5893	-0.13	0.623	-20.7188
13.6002	-0.49	0.6235	-20.7812
13.6111	-0.61	0.624	-20.875
13.622	0.13	0.6245	-20.8125
13.6329	-0.49	0.625	-20.8438
13.6438	-0.4	0.6255	-20.8125
13.6547	-0.32	0.626	-20.5625
13.6656	0.34	0.6265	-20.6875
13.6765	0.05	0.627	-20.6562
13.6874	-0.01	0.6275	-20.625
13.6983	-0.45	0.628	-20.5
13.7092	-0.3	0.6285	-20.75
13.7201	-0.18	0.629	-20.5312
13.731	-0.4	0.6295	-20.6875
13.7419	0	0.63	-20.4688
13.7528	-0.25	0.6305	-20.5
13.7637	0.03	0.631	-20.75
13.7746	-0.03	0.6315	-20.4688
13.7855	-0.05	0.632	-20.7188
13.7964	-0.33	0.6325	-20.5625
13.8073	-0.11	0.633	-20.5625
13.8182	0.03	0.6335	-20.4688
13.8291	-0.19	0.634	-20.4375
13.84	-0.11	0.6345	-20.3438
13.8509	0.29	0.635	-20.4062
13.8618	0.1	0.6355	-20.4062
13.8727	0.02	0.636	-20.3125
13.8836	0.3	0.6365	-20.625
13.8945	-0.17	0.637	-20.5312
13.9054	0.02	0.6375	-20.625
13.9163	-0.04	0.638	-20.5625
13.9272	-0.4	0.6385	-20.7188
13.9381	0.16	0.639	-20.7188
13.949	-0.15	0.6395	-20.625
13.9598	-0.16	0.64	-20.75
13.9707	0.03	0.6405	-20.8438
13.9816	0.52	0.641	-20.875
13.9925	-0.38	0.6415	-20.8125
14.0034	-0.12	0.642	-20.75
14.0143	-0.18	0.6425	-20.7188
14.0252	0.05	0.643	-20.8125
14.0361	0.04	0.6435	-20.75
14.047	0.14	0.644	-20.9375
14.0579	-0.12	0.6445	-20.9375
14.0688	0.03	0.645	-21.0625
14.0797	-0.16	0.6455	-21.1562
14.0906	0.01	0.646	-21.125
14.1015	-0.07	0.6465	-21.1562
14.1124	0.31	0.647	-20.9375
14.1233	-0.39	0.6475	-21.125
14.1342	-0.07	0.648	-21.2188
14.1451	-0.2	0.6485	-21.1875
14.156	0.02	0.649	-21.375
14.1669	0.03	0.6495	-21.2188
14.1778	-0.14	0.65	-21.3438
14.1887	-0.03	0.6505	-21.3438
14.1996	0.01	0.651	-21.4062
14.2105	-0.1	0.6515	-21.4062
14.2214	-0.05	0.652	-21.1875
14.2323	0.38	0.6525	-21.1875
14.2432	-0.43	0.653	-21.3125
14.2541	0.08	0.6535	-21.0312
14.265	0.67	0.654	-21.1875
14.2759	0.26	0.6545	-21.2812
14.2868	-0.71	0.655	-21.2812
14.2977	-0.28	0.6555	-21.125
14.3086	-0.42	0.656	-21.2188
14.3195	0.51	0.6565	-21.3125
14.3304	0.21	0.657	-21
14.3413	0.18	0.6575	-21.25
14.3522	0.12	0.658	-21
14.3631	-0.06	0.6585	-21.2188
14.374	-0.6	0.659	-21.1562
14.3849	0.06	0.6595	-21.2812
14.3958	0.08	0.66	-21.1875
14.4067	-0.17	0.6605	-21.3438
14.4176	0.44	0.661	-21.4062
14.4284	-0.12	0.6615	-21.4688
14.4393	0.47	0.662	-21.1562
14.4502	-0.31	0.6625	-21.4375
14.4611	-0.26	0.663	-21.5938
14.472	-0.01	0.6635	-21.5625
14.4829	-0.45	0.664	-21.5312
14.4938	-0.07	0.6645	-21.6875
14.5047	0.01	0.665	-21.7188
14.5156	-0.49	0.6655	-21.75
14.5265	-0.19	0.666	-21.6875
14.5374	0.04	0.6665	-21.5625
14.5483	0.19	0.667	-21.5625
14.5592	-0.17	0.6675	-21.4375
14.5701	0.14	0.668	-21.7188
14.581	-0.23	0.6685	-21.8125
14.5919	-0.27	0.669	-21.75
14.6028	0.32	0.6695	-21.9062
14.6137	0.29	0.67	-21.75
14.6246	0.27	0.6705	-21.7188
14.6355	0.27	0.671	-21.9375
14.6464	-0.41	0.6715	-22.0312
14.6573	-0.1	0.672	-21.8438
14.6682	0.01	0.6725	-21.9062
14.6791	-0.28	0.673	-21.8438
14.69	0.18	0.6735	-21.875
14.7009	0.1	0.674	-21.9062
14.7118	0.15	0.6745	-21.6875
14.7227	-0.4	0.675	-21.75
14.7336	-0.36	0.6755	-21.625
14.7445	0.2	0.676	-21.625
14.7554	0.03	0.6765	-21.6875
14.7663	0.03	0.677	-21.7188
14.7772	-0.33	0.6775	-21.5625
14.7881	-0.15	0.678	-21.75
14.799	-0.01	0.6785	-21.75
14.8099	0.19	0.679	-21.6562
14.8208	0.13	0.6795	-21.8125
14.8317	-0.44	0.68	-21.8125
14.8426	0.27	0.6805	-21.9375
14.8535	-0.11	0.681	-21.9062
14.8644	-0.21	0.6815	-21.8125
14.8753	-0.39	0.682	-21.75
14.8861	-0.07	0.6825	-21.625
14.897	-0.24	0.683	-21.625
14.9079	-0.11	0.6835	-21.5312
14.9188	-0.22	0.684	-21.625
14.9297	0.11	0.6845	-21.8125
14.9406	0.05	0.685	-21.8438
14.9515	-0.42	0.6855	-22.0312
14.9624	0.06	0.686	-22.125
14.9733	0.06	0.6865	-21.9688
14.9842	0.02	0.687	-22.1562
14.9951	-0.4	0.6875	-22.1562
15.006	-0.2	0.688	-22.0625
15.0169	-0.55	0.6885	-22.1562
15.0278	-0.24	0.689	-22.25
15.0387	-0.25	0.6895	-22.0938
15.0496	-0.09	0.69	-22.1562
15.0605	0.05	0.6905	-22.1875
15.0714	-0.48	0.691	-22.3438
15.0823	0.26	0.6915	-22.375
15.0932	0.13	0.692	-22.25
15.1041	-0.02	0.6925	-22.1875
15.115	-0.17	0.693	-22.0938
15.1259	-0.09	0.6935	-22.1562
15.1368	0.39	0.694	-22.3125
15.1477	0.54	0.6945	-22.3438
15.1586	0.44	0.695	-22.2812
15.1695	0.25	0.6955	-22.25
15.1804	0.23	0.696	-22.1875
15.1913	-0.19	0.6965	-22.4062
15.2022	0.37	0.697	-22.4062
15.2131	-0.19	0.6975	-22.4375
15.224	0.24	0.698	-22.4375
15.2349	0.2	0.6985	-22.5312
15.2458	0.19	0.699	-22.4375
15.2567	0.77	0.6995	-22.5312
15.2676	0.03	0.7	-22.625
15.2785	0.3	0.7005	-22.5625
15.2894	-0.19	0.701	-22.6562
15.3003	0.47	0.7015	-22.6562
15.3112	0.39	0.702	-22.5938
15.3221	-0.43	0.7025	-22.625
15.333	0.11	0.703	-22.5312
15.3438	-0.36	0.7035	-22.5938
15.3547	0.25	0.704	-22.5312
15.3656	-0.05	0.7045	-22.3438
15.3765	0	0.705	-22.3438
15.3874	-0.24	0.7055	-22.3438
15.3983	0.19	0.706	-22.375
15.4092	0.36	0.7065	-22.25
15.4201	0.07	0.707	-22.4062
15.431	-0.07	0.7075	-22.5312
15.4419	-0.06	0.708	-22.375
15.4528	0.35	0.7085	-22.4688
15.4637	0.22	0.709	-22.4375
15.4746	0.11	0.7095	-22.5312
15.4855	-0.2	0.71	-22.5938
15.4964	0.07	0.7105	-22.5938
15.5073	-0.15	0.711	-22.5625
15.5182	-0.15	0.7115	-22.5938
15.5291	-0.06	0.712	-22.5625
15.54	-0.21	0.7125	-22.3438
15.5509	-0.02	0.713	-22.7188
15.5618	0.15	0.7135	-22.4375
15.5727	0.05	0.714	-22.5312
15.5836	0.11	0.7145	-22.625
15.5945	0.36	0.715	-22.5938
15.6054	0.24	0.7155	-22.6562
15.6163	-0.39	0.716	-22.5938
15.6272	-0.21	0.7165	-22.75
15.6381	-0.13	0.717	-22.6875
15.649	0.47	0.7175	-22.7188
15.6599	-0.13	0.718	-22.7812
15.6708	0.18	0.7185	-22.8438
15.6817	-0.47	0.719	-22.9062
15.6926	0.02	0.7195	-22.875
15.7035	0.05	0.72	-22.9062
15.7144	-0.04	0.7205	-22.75
15.7253	0.4	0.721	-22.7812
15.7362	0.12	0.7215	-22.9062
15.7471	0.56	0.722	-22.9062
15.758	0.23	0.7225	-22.9062
15.7689	0.09	0.723	-22.9688
15.7798	0.24	0.7235	-22.8438
15.7907	-0.04	0.724	-22.875
15.8015	0.02	0.7245	-22.9375
15.8124	0.22	0.725	-22.75
15.8233	0.3	0.7255	-22.75
15.8342	0.47	0.726	-22.9375
15.8451	0.32	0.7265	-22.75
15.856	0.01	0.727	-22.7188
15.8669	0.21	0.7275	-22.8125
15.8778	-0.15	0.728	-22.7188
15.8887	-0.07	0.7285	-22.75
15.8996	-0.02	0.729	-22.75
15.9105	-0.02	0.7295	-22.625
15.9214	0.39	0.73	-22.7188
15.9323	0.6	0.7305	-22.8125
15.9432	0.21	0.731	-22.75
15.9541	0.33	0.7315	-22.75
15.965	0.13	0.732	-22.625
15.9759	-0.29	0.7325	-22.6562
15.9868	0.14	0.733	-22.5938
15.9977	0.54	0.7335	-22.6875
16.0086	0.23	0.734	-22.6875
16.0195	0.05	0.7345	-22.4688
16.0304	0.13	0.735	-22.6875
16.0413	0	0.7355	-22.6875
16.0522	0.25	0.736	-22.625
16.0631	-0.23	0.7365	-22.6562
16.074	-0.29	0.737	-22.6562
16.0849	0.04	0.7375	-22.625
16.0958	0.11	0.738	-22.6562
16.1067	0.01	0.7385	-22.7188
16.1176	0.21	0.739	-22.7188
16.1285	0	0.7395	-22.75
16.1394	-0.01	0.74	-22.5312
16.1503	0.39	0.7405	-22.4688
16.1612	0.37	0.741	-22.1875
16.1721	0.27	0.7415	-22.0625
16.183	0.36	0.742	-22.1875
16.1939	-0.19	0.7425	-21.9375
16.2048	0.14	0.743	-22.0625
16.2157	0.23	0.7435	-21.9375
16.2266	0.16	0.744	-22.0625
16.2375	-0.33	0.7445	-22
16.2484	-0.35	0.745	-22.0312
16.2592	-0.03	0.7455	-22.0938
16.2701	0.1	0.746	-21.9688
16.281	0.32	0.7465	-22.1875
16.2919	0.45	0.747	-22
16.3028	0.43	0.7475	-21.9062
16.3137	-0.41	0.748	-21.9375
16.3246	0.26	0.7485	-21.9375
16.3355	-0.16	0.749	-21.875
16.3464	-0.12	0.7495	-21.8438
16.3573	-0.13	0.75	-21.6875
16.3682	-0.13	0.7505	-21.8438
16.3791	-0.07	0.751	-22
16.39	-0.02	0.7515	-21.9062
16.4009	-0.07	0.752	-21.9375
16.4118	-0.34	0.7525	-22.0312
16.4227	-0.07	0.753	-21.9688
16.4336	-0.68	0.7535	-22.0625
16.4445	-0.08	0.754	-22.0625
16.4554	0.02	0.7545	-22
16.4663	-0.2	0.755	-22.125
16.4772	-0.11	0.7555	-22.0938
16.4881	-0.47	0.756	-22.0312
16.499	-0.44	0.7565	-22.0938
16.5099	-0.55	0.757	-22.0625
16.5208	0.14	0.7575	-22.0312
16.5317	-0.33	0.758	-21.9062
16.5426	0.09	0.7585	-21.9375
16.5535	0.11	0.759	-22.125
16.5644	0.2	0.7595	-22.1875
16.5753	0.57	0.76	-22.2188
16.5862	0.24	0.7605	-22.125
16.5971	0.07	0.761	-22.125
16.608	0.03	0.7615	-22.25
16.6189	0.03	0.762	-22.25
16.6298	-0.43	0.7625	-22.125
16.6407	0.05	0.763	-22.25
16.6516	0.36	0.7635	-22.1562
16.6625	-0.17	0.764	-22.2188
16.6734	0.17	0.7645	-22.4688
16.6843	-0.03	0.765	-22.25
16.6952	0.69	0.7655	-22.5625
16.706	-0.1	0.766	-22.5938
16.7169	0.06	0.7665	-22.5312
16.7278	-0.19	0.767	-22.3438
16.7387	-0.46	0.7675	-22.3125
16.7496	-0.17	0.768	-22.4375
16.7605	0.06	0.7685	-22.2812
16.7714	0.07	0.769	-22.2188
16.7823	-0.14	0.7695	-22.4375
16.7932	0.46	0.77	-22.2188
16.8041	-0.13	0.7705	-22.3125
16.815	0.29	0.771	-22.4062
16.8259	-0.11	0.7715	-22.4062
16.8368	-0.13	0.772	-22.4375
16.8477	0.34	0.7725	-22.375
16.8586	0.27	0.773	-22.3125
16.8695	-0.24	0.7735	-22.3438
16.8804	0	0.774	-22.375
16.8913	0.64	0.7745	-22.4375
16.9022	-0.19	0.775	-22.5625
16.9131	0.38	0.7755	-22.5938
16.924	0.95	0.776	-22.4375
16.9349	0.93	0.7765	-22.4688
16.9458	1.61	0.777	-22.375
16.9567	1.32	0.7775	-22.4375
16.9676	1.44	0.778	-22.4375
16.9785	1.65	0.7785	-22.25
16.9894	1.57	0.779	-22.375
17.0003	1.39	0.7795	-22.375
17.0112	1.76	0.78	-22.5312
17.0221	1.09	0.7805	-22.625
17.033	1.67	0.781	-22.6875
17.0439	0.93	0.7815	-22.625
17.0548	0.89	0.782	-22.6875
17.0657	0.97	0.7825	-22.9062
17.0766	1.01	0.783	-22.7188
17.0875	0.54	0.7835	-22.6562
17.0984	-0.12	0.784	-22.9062
17.1093	-0.44	0.7845	-22.7812
17.1202	-0.96	0.785	-22.9375
17.1311	0.13	0.7855	-23.125
17.142	-0.53	0.786	-23
17.1529	-0.29	0.7865	-23.125
17.1638	0.19	0.787	-23.125
17.1746	-0.24	0.7875	-22.9375
17.1855	-0.74	0.788	-23
17.1964	-0.18	0.7885	-23.1562
17.2073	0.14	0.789	-23.0625
17.2182	-0.16	0.7895	-23.125
17.2291	-0.07	0.79	-22.9688
17.24	-0.81	0.7905	-23.0625
17.2509	-0.18	0.791	-22.9688
17.2618	-0.33	0.7915	-22.9688
17.2727	-0.42	0.792	-22.9375
17.2836	-0.5	0.7925	-22.9062
17.2945	-0.38	0.793	-22.7188
17.3054	-0.29	0.7935	-22.7812
17.3163	-0.22	0.794	-22.8125
17.3272	-0.47	0.7945	-22.9375
17.3381	-0.45	0.795	-22.875
17.349	-0.42	0.7955	-22.9375
17.3599	-0.73	0.796	-22.875
17.3708	-1.2	0.7965	-22.9688
17.3817	-0.79	0.797	-22.875
17.3926	-0.21	0.7975	-22.7812
17.4035	-0.55	0.798	-22.6562
17.4144	-0.36	0.7985	-22.5938
17.4253	-0.51	0.799	-22.75
17.4362	-0.26	0.7995	-22.6875
17.4471	-0.43	0.8	-22.7812
17.458	-0.44	0.8005	-22.6875
17.4689	-0.4	0.801	-22.625
17.4798	-0.37	0.8015	-22.625
17.4907	-0.71	0.802	-22.4688
17.5016	-0.76	0.8025	-22.5938
17.5125	-0.36	0.803	-22.5938
17.5234	-0.19	0.8035	-22.5312
17.5343	-0.4	0.804	-22.4375
17.5452	-0.68	0.8045	-22.4375
17.5561	-0.72	0.805	-22.3438
17.567	-0.33	0.8055	-22.5625
17.5779	-0.21	0.806	-22.3438
17.5888	-0.34	0.8065	-22.4062
17.5997	-0.55	0.807	-22.5312
17.6106	-0.26	0.8075	-22.6562
17.6214	-0.46	0.808	-22.4688
17.6323	-0.17	0.8085	-22.6562
17.6432	-0.11	0.809	-22.5312
17.6541	0.15	0.8095	-22.6875
17.665	-0.29	0.81	-22.6875
17.6759	-0.15	0.8105	-22.8125
17.6868	-0.38	0.811	-22.7812
17.6977	-0.34	0.8115	-22.5625
17.7086	-0.53	0.812	-22.8125
17.7195	-0.29	0.8125	-22.9375
17.7304	-0.2	0.813	-22.9688
17.7413	0.28	0.8135	-22.8438
17.7522	0.17	0.814	-23.0625
17.7631	-0.02	0.8145	-22.9062
17.774	-0.3	0.815	-23.125
17.7849	-0.17	0.8155	-22.9062
17.7958	-0.48	0.816	-22.9688
17.8067	0.27	0.8165	-22.9375
17.8176	-0.45	0.817	-22.7812
17.8285	0.09	0.8175	-22.875
17.8394	-0.13	0.818	-22.875
17.8503	0	0.8185	-22.9062
17.8612	-0.03	0.819	-22.8125
17.8721	-0.06	0.8195	-22.8438
17.883	-0.32	0.82	-22.8438
17.8939	-0.08	0.8205	-22.8125
17.9048	-0.37	0.821	-22.875
17.9157	-0.04	0.8215	-22.9375
17.9266	-0.57	0.822	-22.8438
17.9375	-0.62	0.8225	-22.9375
17.9484	-0.54	0.823	-22.875
17.9593	-0.1	0.8235	-22.9688
17.9702	-0.33	0.824	-22.9062
17.9811	-0.64	0.8245	-22.9375
17.992	0.05	0.825	-22.9375
18.0029	0.19	0.8255	-22.9688
18.0138	-0.29	0.826	-22.9688
18.0247	-0.27	0.8265	-23
18.0356	-0.41	0.827	-22.875
18.0465	-0.77	0.8275	-22.875
18.0574	-0.11	0.828	-22.9688
18.0683	-0.04	0.8285	-22.75
18.0792	-0.52	0.829	-22.7812
18.09	-0.14	0.8295	-22.75
18.1009	-0.17	0.83	-22.8125
18.1118	-0.3	0.8305	-22.875
18.1227	-0.37	0.831	-22.875
18.1336	-0.13	0.8315	-22.8125
18.1445	-0.03	0.832	-22.9688
18.1554	-0.11	0.8325	-22.8438
18.1663	0.08	0.833	-22.9688
18.1772	0.04	0.8335	-22.875
18.1881	-0.07	0.834	-22.8438
18.199	0.35	0.8345	-22.9062
18.2099	-0.1	0.835	-22.9062
18.2208	-0.2	0.8355	-22.8125
18.2317	0.2	0.836	-22.9375
18.2426	-0.12	0.8365	-22.7188
18.2535	-0.08	0.837	-22.6875
18.2644	-0.05	0.8375	-22.625
18.2753	0.44	0.838	-22.5938
18.2862	-0.13	0.8385	-22.4688
18.2971	0.25	0.839	-22.2812
18.308	-0.41	0.8395	-22.4062
18.3189	-0.46	0.84	-22.375
18.3298	0.05	0.8405	-22.5625
18.3407	0.41	0.841	-22.2188
18.3516	-0.22	0.8415	-22.3438
18.3625	0.26	0.842	-22.375
18.3734	-0.08	0.8425	-22.4062
18.3843	-0.17	0.843	-22.2812
18.3952	-0.19	0.8435	-22.375
18.4061	-0.08	0.844	-22.2188
18.417	-0.35	0.8445	-22.25
18.4279	-0.14	0.845	-22.2812
18.4388	0.11	0.8455	-22.2812
18.4497	-0.06	0.846	-22.25
18.4606	-0.18	0.8465	-22.2188
18.4715	0.11	0.847	-22.125
18.4824	-0.11	0.8475	-22.2812
18.4933	-0.18	0.848	-22.0938
18.5042	-0.23	0.8485	-22.1875
18.5151	-0.21	0.849	-22.0312
18.526	0.06	0.8495	-22.1562
18.5368	-0.23	0.85	-22
18.5477	-0.43	0.8505	-22.0625
18.5586	0.26	0.851	-22.2188
18.5695	0.05	0.8515	-22.1875
18.5804	0.15	0.852	-22.1875
18.5913	0.03	0.8525	-22.0938
18.6022	-0.04	0.853	-22.2188
18.6131	-0.11	0.8535	-22.25
18.624	0.01	0.854	-22.1875
18.6349	-0.07	0.8545	-22.0938
18.6458	0.23	0.855	-22
18.6567	0.11	0.8555	-22.0625
18.6676	-0.78	0.856	-22.1562
18.6785	-0.54	0.8565	-22
18.6894	-0.06	0.857	-22.0938
18.7003	-0.48	0.8575	-22.0938
18.7112	-0.23	0.858	-21.9062
18.7221	0.31	0.8585	-22.0312
18.733	-0.33	0.859	-21.9062
18.7439	-0.15	0.8595	-22.1562
18.7548	-0.66	0.86	-21.9375
18.7657	-0.17	0.8605	-22.125
18.7766	0.16	0.861	-21.875
18.7875	0.33	0.8615	-21.9688
18.7984	0.38	0.862	-22.0312
18.8093	-0.13	0.8625	-22.1875
18.8202	0.07	0.863	-22
18.8311	0.33	0.8635	-22.1875
18.842	-0.04	0.864	-22.0938
18.8529	0.16	0.8645	-22.0312
18.8638	0.02	0.865	-22.0938
18.8747	-0.06	0.8655	-22.1875
18.8856	0.02	0.866	-22.1875
18.8965	-0.05	0.8665	-22.1875
18.9074	0.13	0.867	-22.375
18.9183	-0.05	0.8675	-22.1875
18.9292	0.47	0.868	-22.5312
18.9401	0.49	0.8685	-22.375
18.951	0.48	0.869	-22.5938
18.9619	0.84	0.8695	-22.4062
18.9728	1.41	0.87	-22.5312
18.9837	1.39	0.8705	-22.625
18.9946	1.58	0.871	-22.4688
19.0054	1.65	0.8715	-22.5625
19.0163	1.23	0.872	-22.5938
19.0272	1.25	0.8725	-22.5938
19.0381	1.58	0.873	-22.8125
19.049	1.14	0.8735	-22.7812
19.0599	1.2	0.874	-22.6562
19.0708	1.14	0.8745	-22.6562
19.0817	0.93	0.875	-22.7188
19.0926	0.63	0.8755	-22.7188
19.1035	1.09	0.876	-22.6875
19.1144	0.55	0.8765	-22.6875
19.1253	0.28	0.877	-22.7188
19.1362	0.16	0.8775	-22.625
19.1471	0.06	0.878	-22.875
19.158	-0.16	0.8785	-22.625
19.1689	-0.31	0.879	-22.8125
19.1798	-0.09	0.8795	-22.8438
19.1907	-0.12	0.88	-22.875
19.2016	-0.05	0.8805	-22.9062
19.2125	0.16	0.881	-22.9688
19.2234	-0.21	0.8815	-22.9688
19.2343	0	0.882	-23.0312
19.2452	0.09	0.8825	-23.0625
19.2561	0.38	0.883	-23.0938
19.267	-0.05	0.8835	-22.9688
19.2779	0.1	0.884	-22.875
19.2888	-0.4	0.8845	-22.875
19.2997	-0.28	0.885	-22.875
19.3106	-0.12	0.8855	-22.7812
19.3215	-0.36	0.886	-22.7812
19.3324	-0.68	0.8865	-22.6875
19.3433	-0.48	0.887	-22.8438
19.3542	-0.35	0.8875	-22.875
19.3651	-0.53	0.888	-22.875
19.376	-0.47	0.8885	-22.8438
19.3869	-0.36	0.889	-22.7188
19.3978	-0.14	0.8895	-22.6875
19.4087	-0.3	0.89	-22.4688
19.4196	-0.2	0.8905	-22.3125
19.4305	-0.79	0.891	-22.4062
19.4414	-0.2	0.8915	-22.3438
19.4522	0	0.892	-22.1875
19.4631	-0.31	0.8925	-22.0312
19.474	-0.18	0.893	-22.125
19.4849	-0.48	0.8935	-21.9062
19.4958	-0.02	0.894	-21.9375
19.5067	-0.82	0.8945	-21.8438
19.5176	-0.17	0.895	-21.9688
19.5285	-0.47	0.8955	-21.9062
19.5394	0.22	0.896	-21.875
19.5503	-0.45	0.8965	-21.9375
19.5612	-1.02	0.897	-21.875
19.5721	-0.86	0.8975	-21.8438
19.583	-0.68	0.898	-21.75
19.5939	-0.49	0.8985	-21.8438
19.6048	-0.33	0.899	-21.8438
19.6157	0.31	0.8995	-21.8438
19.6266	-0.66	0.9	-21.875
19.6375	-0.71	0.9005	-21.9062
19.6484	-0.82	0.901	-21.8125
19.6593	-0.84	0.9015	-22
19.6702	-0.27	0.902	-21.9062
19.6811	-0.52	0.9025	-21.9062
19.692	0.52	0.903	-22.125
19.7029	-0.18	0.9035	-22.0312
19.7138	-0.24	0.904	-21.9375
19.7247	-0.16	0.9045	-21.875
19.7356	-0.33	0.905	-21.9375
19.7465	-0.84	0.9055	-21.9062
19.7574	-0.35	0.906	-21.875
19.7683	0.09	0.9065	-21.75
19.7792	-0.21	0.907	-21.9688
19.7901	-0.16	0.9075	-21.875
19.801	-0.35	0.908	-21.875
19.8119	-0.16	0.9085	-21.8125
19.8228	-0.29	0.909	-21.9375
19.8337	-0.21	0.9095	-21.9062
19.8446	-0.07	0.91	-21.6562
19.8555	-0.31	0.9105	-21.6875
19.8664	-0.71	0.911	-21.625
19.8773	-0.13	0.9115	-21.6875
19.8882	-0.19	0.912	-21.875
19.8991	-0.53	0.9125	-21.9688
19.91	-0.11	0.913	-21.75
19.9208	0.33	0.9135	-21.875
19.9317	-0.07	0.914	-21.5312
19.9426	0.47	0.9145	-21.7188
19.9535	0.27	0.915	-21.5
19.9644	-0.21	0.9155	-21.3125
19.9753	0.06	0.916	-21.3125
19.9862	0.32	0.9165	-21
19.9971	-0.55	0.917	-21.1562
20.008	-0.1	0.9175	-21
20.0189	-0.03	0.918	-20.9062
20.0298	-0.3	0.9185	-20.9375
20.0407	0.16	0.919	-20.8125
20.0516	-0.1	0.9195	-20.8438
20.0625	-0.25	0.92	-20.6562
20.0734	-0.05	0.9205	-20.8125
20.0843	-0.42	0.921	-20.75
20.0952	0.24	0.9215	-20.625
20.1061	-0.23	0.922	-20.625
20.117	0.3	0.9225	-20.5
20.1279	0.08	0.923	-20.5625
20.1388	-0.44	0.9235	-20.5625
20.1497	0.19	0.924	-20.75
20.1606	-0.04	0.9245	-20.6875
20.1715	0.27	0.925	-20.625
20.1824	0.53	0.9255	-20.6875
20.1933	-0.11	0.926	-20.4375
20.2042	0.07	0.9265	-20.5312
20.2151	0.43	0.927	-20.3125
20.226	0.67	0.9275	-20.4375
20.2369	0.9	0.928	-20.5
20.2478	1.15	0.9285	-20.3438
20.2587	1.03	0.929	-20.125
20.2696	1.25	0.9295	-19.8438
20.2805	1.25	0.93	-19.75
20.2914	1.63	0.9305	-19.625
20.3023	1.27	0.931	-19.4062
20.3132	1.39	0.9315	-19.375
20.3241	0.99	0.932	-19.1875
20.335	0.68	0.9325	-19.0312
20.3459	1.12	0.933	-18.75
20.3568	0.49	0.9335	-18.375
20.3676	0.11	0.934	-17.9688
20.3785	-0.15	0.9345	-17.9688
20.3894	0	0.935	-17.9375
20.4003	0.2	0.9355	-17.9375
20.4112	0.56	0.936	-17.875
20.4221	0.13	0.9365	-17.8125
20.433	-0.06	0.937	-17.9375
20.4439	0.17	0.9375	-17.9375
20.4548	0.11	0.938	-17.9062
20.4657	-0.42	0.9385	-18
20.4766	-0.03	0.939	-17.6875
20.4875	-0.17	0.9395	-17.625
20.4984	0.01	0.94	-17.75
20.5093	-0.52	0.9405	-17.9375
20.5202	-0.42	0.941	-17.8438
20.5311	-0.18	0.9415	-17.8438
20.542	-0.09	0.942	-17.875
20.5529	-0.16	0.9425	-17.8125
20.5638	-0.28	0.943	-17.9375
20.5747	-0.02	0.9435	-17.7812
20.5856	-0.05	0.944	-17.875
20.5965	-0.17	0.9445	-17.75
20.6074	-0.05	0.945	-18.0625
20.6183	0.07	0.9455	-18
20.6292	0.49	0.946	-17.9375
20.6401	0.14	0.9465	-17.875
20.651	0.28	0.947	-17.9375
20.6619	0.3	0.9475	-18.0312
20.6728	0.14	0.948	-17.9688
20.6837	0.41	0.9485	-17.7812
20.6946	0.11	0.949	-17.9062
20.7055	0.02	0.9495	-18.0312
20.7164	0.19	0.95	-17.875
20.7273	0.08	0.9505	-17.9688
20.7382	-0.2	0.951	-18
20.7491	0.53	0.9515	-18
20.76	0.45	0.952	-18.1875
20.7709	-0.14	0.9525	-18.1875
20.7818	0.13	0.953	-18.2188
20.7927	0.09	0.9535	-18.2188
20.8036	0.28	0.954	-18.125
20.8145	-0.07	0.9545	-18.0312
20.8254	0.24	0.955	-18.125
20.8362	-0.01	0.9555	-18.125
20.8471	-0.1	0.956	-18.0938
20.858	-0.2	0.9565	-18.1562
20.8689	-0.06	0.957	-18.1875
20.8798	-0.28	0.9575	-17.9688
20.8907	-0.36	0.958	-18.0938
20.9016	-0.27	0.9585	-18.0312
20.9125	0.12	0.959	-18.0938
20.9234	-0.6	0.9595	-18.0312
20.9343	0.32	0.96	-18.1562
20.9452	-0.2	0.9605	-17.875
20.9561	-0.08	0.961	-18.0938
20.967	-0.28	0.9615	-18.125
20.9779	-0.13	0.962	-18.0625
20.9888	0.14	0.9625	-18.125
20.9997	-0.19	0.963	-18.2188
21.0106	-0.49	0.9635	-18.1562
21.0215	-0.35	0.964	-18.3438
21.0324	-0.24	0.9645	-18.1875
21.0433	-0.24	0.965	-18.0625
21.0542	-0.3	0.9655	-18.0938
21.0651	-0.47	0.966	-18.0938
21.076	0.03	0.9665	-18.1875
21.0869	-0.07	0.967	-18.1875
21.0978	-0.12	0.9675	-17.9688
21.1087	-0.55	0.968	-18.0625
21.1196	-0.23	0.9685	-18.0938
21.1305	-0.13	0.969	-17.9062
21.1414	0.17	0.9695	-17.9688
21.1523	0.35	0.97	-17.7188
21.1632	0.01	0.9705	-17.8125
21.1741	0.03	0.971	-17.75
21.185	-0.31	0.9715	-17.9375
21.1959	0.41	0.972	-17.875
21.2068	-0.06	0.9725	-17.9375
21.2177	-0.03	0.973	-17.9375
21.2286	-0.22	0.9735	-18.0312
21.2395	-0.22	0.974	-18.0312
21.2504	-0.2	0.9745	-18.0312
21.2613	0.14	0.975	-18.0312
21.2722	-0.58	0.9755	-17.8438
21.283	0.07	0.976	-17.9688
21.2939	-0.28	0.9765	-17.9375
21.3048	0.03	0.977	-17.8125
21.3157	-0.22	0.9775	-17.875
21.3266	-0.71	0.978	-18
21.3375	-0.2	0.9785	-18
21.3484	-0.12	0.979	-17.6875
21.3593	-0.77	0.9795	-17.9062
21.3702	0.1	0.98	-17.9062
21.3811	-0.16	0.9805	-17.9375
21.392	-0.06	0.981	-18
21.4029	0.02	0.9815	-18.0625
21.4138	-0.07	0.982	-18.1875
21.4247	0.03	0.9825	-18.5625
21.4356	0.39	0.983	-18.4688
21.4465	-0.05	0.9835	-18.4375
21.4574	0.13	0.984	-18.5312
21.4683	0.09	0.9845	-18.4688
21.4792	-0.13	0.985	-18.5625
21.4901	-0.73	0.9855	-18.4688
21.501	-0.27	0.986	-18.375
21.5119	-0.19	0.9865	-18.375
21.5228	0.52	0.987	-18.4375
21.5337	0.54	0.9875	-18.7812
21.5446	0.18	0.988	-18.5625
21.5555	-0.22	0.9885	-18.5938
21.5664	-0.28	0.989	-18.5625
21.5773	0.15	0.9895	-18.4688
21.5882	-0.36	0.99	-18.4688
21.5991	-0.5	0.9905	-18.4062
21.61	-0.1	0.991	-18.25
21.6209	0.11	0.9915	-18.4688
21.6318	-0.29	0.992	-18.5625
21.6427	-0.3	0.9925	-18.5
21.6536	-0.23	0.993	-18.4688
21.6645	0.19	0.9935	-18.5625
21.6754	-0.42	0.994	-18.4688
21.6863	-0.2	0.9945	-18.4062
21.6972	-0.13	0.995	-18.3438
21.7081	-0.09	0.9955	-18.375
21.719	-0.01	0.996	-18.3438
21.7299	-0.58	0.9965	-18.5625
21.7408	0	0.997	-18.4062
21.7516	0.09	0.9975	-18.375
21.7625	0.07	0.998	-18.3438
21.7734	0.41	0.9985	-18.4688
[truncated: 40,003 more rows]

## Sheet: ED Figure 7C
dark	laser + cal.
36.03	38.04
33.06	39.3
34.4	39.1
35.58	26.59
35.3	37.5
33.04	38.85
31.34	37.61
32.22	32.35
36.69	27.93
39.001	21.36
32.83	16.12
22.4	30.47
27.46	33.97
29.21	27.61
17.08	27.54
28.2	17.43
28	16.53
14.76	29.35
30.15	18.31
35.01	21.29
28.6	15.18
25.5	17.39
9.73
10.63
18.38
p-value:	0.85103

## Sheet: ED Figure 7D
no light before (a)	no light before (b)	637 nm	637 nm + cal	637 + 470 nm
-17.49	-23.03	-20.57	-22.81	-40.51
-17.96	-18.14	-16.89	-17.8	-36.59
-20.17	-16.96	-16.51	-23.33	-29.99
-17.94	-25.37	-25.45	-17.84	-35.36
-26.19	-19.35	-15.71	-25.26
-18.24	-9.51	-9.53	-19.06
-13.6	-21.98	-17.97	-12.76
-11.43	-30.78	-24.86	-10.89
-22.02	-21.29	-17.78	-26.08
-30.88	-20.19	-18.63	-30.95
-21.86	-19.97	-17.12	-21.67
-18.96	-23.2	-21.77	-21.72
-19.11			-20.31
-22.99			-23.42
	p-value:
no light before (b) / no light before (a)	1
637 nm / no light before (a)	1
637 nm / no light before (b)	1
637 nm + cal / no light before (a)	1
637 nm + cal / no light before (b)	1
637 nm + cal / 637 nm	1
637 + 470 nm / no light before (a)	6.05038e-05
637 + 470 nm / no light before (b)	0.0001939
637 + 470 nm / 637 nm	5.52538e-05
637 + 470 nm / 637 nm + cal	0.000188419

## Sheet: ED Figure 7E
	OR	moving average 100 frames	mov ave 100 frames moved 40
0	-25.5312	-25.3054
0.0005	-25.2812	-25.3079
0.001	-25.3438	-25.3125
0.0015	-25.6562	-25.3175
0.002	-25.6562	-25.319
0.0025	-25.6875	-25.3218
0.003	-25.5938	-25.3239
0.0035	-25.7188	-25.3289
0.004	-25.875	-25.3304
0.0045	-25.75	-25.3298
0.005	-25.7188	-25.3326
0.0055	-25.7188	-25.3338
0.006	-25.7812	-25.3348
0.0065	-25.8438	-25.336
0.007	-25.8125	-25.3382
0.0075	-25.75	-25.3391
0.008	-25.75	-25.3422
0.0085	-25.8438	-25.3453
0.009	-25.9062	-25.3478
0.0095	-25.5938	-25.3506
0.01	-25.5312	-25.3564
0.0105	-25.625	-25.3629
0.011	-25.5	-25.3679
0.0115	-25.5312	-25.3741
0.012	-25.7188	-25.3827
0.0125	-25.5312	-25.3874
0.013	-25.8125	-25.3957
0.0135	-25.75	-25.4016
0.014	-25.8438	-25.409
0.0145	-25.5938	-25.4152
0.015	-25.625	-25.4236
0.0155	-25.7812	-25.4335
0.016	-25.6562	-25.4397
0.0165	-25.6875	-25.4483
0.017	-25.4688	-25.4573
0.0175	-25.4062	-25.4675
0.018	-25.1562	-25.4817
0.0185	-24.9688	-25.4975
0.019	-24.9688	-25.5152
0.0195	-25.0312	-25.53
0.02	-24.9375	-25.5467	-25.3054
0.0205	-25	-25.5656	-25.3079
0.021	-24.9062	-25.5826	-25.3125
0.0215	-24.9688	-25.6009	-25.3175
0.022	-25.0312	-25.6191	-25.319
0.0225	-25.0625	-25.6349	-25.3218
0.023	-25.125	-25.6535	-25.3239
0.0235	-25.0938	-25.6733	-25.3289
0.024	-24.875	-25.6915	-25.3304
0.0245	-24.9688	-25.7107	-25.3298
0.025	-24.8125	-25.7324	-25.3326
0.0255	-24.875	-25.755	-25.3338
0.026	-24.7188	-25.7778	-25.3348
0.0265	-24.9375	-25.802	-25.336
0.027	-25	-25.8233	-25.3382
0.0275	-24.9375	-25.8441	-25.3391
0.028	-25	-25.8673	-25.3422
0.0285	-24.8438	-25.8895	-25.3453
0.029	-25.0625	-25.9127	-25.3478
0.0295	-24.6562	-25.9356	-25.3506
0.03	-24.75	-25.9613	-25.3564
0.0305	-24.9375	-25.9873	-25.3629
0.031	-24.875	-26.0093	-25.3679
0.0315	-24.9688	-26.034	-25.3741
0.032	-25.0312	-26.0566	-25.3827
0.0325	-24.9688	-26.0783	-25.3874
0.033	-25	-26.1033	-25.3957
0.0335	-25.0312	-26.1262	-25.4016
0.034	-25.0938	-26.1485	-25.409
0.0345	-25.0312	-26.1717	-25.4152
0.035	-24.9688	-26.1955	-25.4236
0.0355	-25.0312	-26.2203	-25.4335
0.036	-24.875	-26.2435	-25.4397
0.0365	-24.9062	-26.2689	-25.4483
0.037	-24.8438	-26.2946	-25.4573
0.0375	-24.8438	-26.3224	-25.4675
0.038	-24.875	-26.3496	-25.4817
0.0385	-24.875	-26.3769	-25.4975
0.039	-24.875	-26.4066	-25.5152
0.0395	-25.0938	-26.4335	-25.53
0.04	-24.9375	-26.4592	-25.5467
0.0405	-25.0938	-26.4864	-25.5656
0.041	-25.125	-26.5121	-25.5826
0.0415	-25.1875	-26.5365	-25.6009
0.042	-25.125	-26.5606	-25.6191
0.0425	-25.2812	-26.5869	-25.6349
0.043	-25.2188	-26.6105	-25.6535
0.0435	-25.375	-26.6352	-25.6733
0.044	-25.4062	-26.6578	-25.6915
0.0445	-25.375	-26.6801	-25.7107
0.045	-25.5	-26.7024	-25.7324
0.0455	-25.5625	-26.7243	-25.755
0.046	-25.5312	-26.7432	-25.7778
0.0465	-25.5312	-26.7624	-25.802
0.047	-25.7188	-26.7828	-25.8233
0.0475	-25.5625	-26.8011	-25.8441
0.048	-25.6562	-26.8202	-25.8673
0.0485	-25.8125	-26.8394	-25.8895
0.049	-25.8438	-26.8555	-25.9127
0.0495	-25.5938	-26.8738	-25.9356
0.05	-25.7188	-26.8939	-25.9613
0.0505	-25.7812	-26.9112	-25.9873
0.051	-25.75	-26.927	-26.0093
0.0515	-25.8438	-26.9449	-26.034
0.052	-25.8125	-26.9592	-26.0566
0.0525	-25.9375	-26.9759	-26.0783
0.053	-25.9062	-26.9923	-26.1033
0.0535	-26.0938	-27.0077	-26.1262
0.054	-25.875	-27.0198	-26.1485
0.0545	-25.8125	-27.0359	-26.1717
0.055	-26.0312	-27.0514	-26.1955
0.0555	-25.8438	-27.0637	-26.2203
0.056	-25.8125	-27.0789	-26.2435
0.0565	-25.9062	-27.0931	-26.2689
0.057	-26.0625	-27.1083	-26.2946
0.0575	-25.9062	-27.12	-26.3224
0.058	-26.0625	-27.1334	-26.3496
0.0585	-26.0625	-27.1463	-26.3769
0.059	-26.0938	-27.1606	-26.4066
0.0595	-26.1875	-27.172	-26.4335
0.06	-26.1875	-27.185	-26.4592
0.0605	-26.1875	-27.1989	-26.4864
0.061	-26.125	-27.2116	-26.5121
0.0615	-26.125	-27.224	-26.5365
0.062	-26.4062	-27.2373	-26.5606
0.0625	-26.1875	-27.2466	-26.5869
0.063	-26.375	-27.2577	-26.6105
0.0635	-26.4062	-27.2673	-26.6352
0.064	-26.5	-27.2763	-26.6578
0.0645	-26.4688	-27.2859	-26.6801
0.065	-26.4375	-27.2967	-26.7024
0.0655	-26.625	-27.3075	-26.7243
0.066	-26.4062	-27.3159	-26.7432
0.0665	-26.5312	-27.3249	-26.7624
0.067	-26.5938	-27.3342	-26.7828
0.0675	-26.5	-27.3416	-26.8011
0.068	-26.8438	-27.3487	-26.8202
0.0685	-26.75	-27.3537	-26.8394
0.069	-26.75	-27.3605	-26.8555
0.0695	-26.4688	-27.366	-26.8738
0.07	-26.7188	-27.3741	-26.8939
0.0705	-26.8438	-27.3796	-26.9112
0.071	-26.7188	-27.3827	-26.927
0.0715	-26.75	-27.388	-26.9449
0.072	-26.8125	-27.3917	-26.9592
0.0725	-26.625	-27.3948	-26.9759
0.073	-26.9375	-27.3994	-26.9923
0.0735	-27.125	-27.4022	-27.0077
0.074	-26.9375	-27.4019	-27.0198
0.0745	-26.8125	-27.4016	-27.0359
0.075	-27.1562	-27.4019	-27.0514
0.0755	-27.0938	-27.4007	-27.0637
0.076	-27.1875	-27.3985	-27.0789
0.0765	-27.1562	-27.3948	-27.0931
0.077	-27.0938	-27.3905	-27.1083
0.0775	-27.0938	-27.3855	-27.12
0.078	-27.2812	-27.3827	-27.1334
0.0785	-27.25	-27.3759	-27.1463
0.079	-27.1875	-27.3716	-27.1606
0.0795	-27.375	-27.366	-27.172
0.08	-27.25	-27.3598	-27.185
0.0805	-27.375	-27.3549	-27.1989
0.081	-27.1562	-27.3496	-27.2116
0.0815	-27.375	-27.3468	-27.224
0.082	-27.25	-27.341	-27.2373
0.0825	-27.2188	-27.3376	-27.2466
0.083	-27.5	-27.3332	-27.2577
0.0835	-27.3125	-27.3267	-27.2673
0.084	-27.2812	-27.3224	-27.2763
0.0845	-27.4375	-27.3187	-27.2859
0.085	-27.4375	-27.3125	-27.2967
0.0855	-27.4688	-27.3066	-27.3075
0.086	-27.375	-27.2998	-27.3159
0.0865	-27.4375	-27.2939	-27.3249
0.087	-27.5	-27.2871	-27.3342
0.0875	-27.6562	-27.2794	-27.3416
0.088	-27.5938	-27.271	-27.3487
0.0885	-27.625	-27.2636	-27.3537
0.089	-27.875	-27.2553	-27.3605
0.0895	-27.5938	-27.2457	-27.366
0.09	-27.6875	-27.2389	-27.3741
0.0905	-27.6875	-27.233	-27.3796
0.091	-27.6875	-27.2256	-27.3827
0.0915	-27.5938	-27.2175	-27.388
0.092	-27.625	-27.211	-27.3917
0.0925	-27.7812	-27.2048	-27.3948
0.093	-27.6562	-27.1968	-27.3994
0.0935	-27.7188	-27.1921	-27.4022
0.094	-27.6562	-27.1856	-27.4019
0.0945	-27.6562	-27.1807	-27.4016
0.095	-27.625	-27.1757	-27.4019
0.0955	-27.7188	-27.1711	-27.4007
0.096	-27.4688	-27.1665	-27.3985
0.0965	-27.4688	-27.1634	-27.3948
0.097	-27.5938	-27.1587	-27.3905
0.0975	-27.5625	-27.1541	-27.3855
0.098	-27.5	-27.151	-27.3827
0.0985	-27.5938	-27.147	-27.3759
0.099	-27.4375	-27.1423	-27.3716
0.0995	-27.6875	-27.1386	-27.366
0.1	-27.625	-27.1334	-27.3598
0.1005	-27.4688	-27.1293	-27.3549
0.101	-27.375	-27.1238	-27.3496
0.1015	-27.5625	-27.12	-27.3468
0.102	-27.2812	-27.1139	-27.341
0.1025	-27.5	-27.1123	-27.3376
0.103	-27.5938	-27.1067	-27.3332
0.1035	-27.4688	-27.103	-27.3267
0.104	-27.3125	-27.1012	-27.3224
0.1045	-27.5	-27.1002	-27.3187
0.105	-27.375	-27.0962	-27.3125
0.1055	-27.2812	-27.0953	-27.3066
0.106	-27.375	-27.0944	-27.2998
0.1065	-27.25	-27.0922	-27.2939
0.107	-27.4375	-27.091	-27.2871
0.1075	-27.25	-27.0882	-27.2794
0.108	-27.25	-27.0876	-27.271
0.1085	-27.375	-27.0879	-27.2636
0.109	-27.5	-27.086	-27.2553
0.1095	-27.25	-27.0854	-27.2457
0.11	-27.5	-27.0866	-27.2389
0.1105	-27.5938	-27.0863	-27.233
0.111	-27.4688	-27.0832	-27.2256
0.1115	-27.375	-27.0817	-27.2175
0.112	-27.4688	-27.0829	-27.211
0.1125	-27.3438	-27.0826	-27.2048
0.113	-27.3125	-27.0838	-27.1968
0.1135	-27.3438	-27.086	-27.1921
0.114	-27.3125	-27.0869	-27.1856
0.1145	-27.4688	-27.0897	-27.1807
0.115	-27.5625	-27.0894	-27.1757
0.1155	-27.5312	-27.0888	-27.1711
0.116	-27.4688	-27.0897	-27.1665
0.1165	-27.3125	-27.0916	-27.1634
0.117	-27.4688	-27.0934	-27.1587
0.1175	-27.3438	-27.0925	-27.1541
0.118	-27.2188	-27.0938	-27.151
0.1185	-27.3438	-27.0959	-27.147
0.119	-27.4375	-27.0959	-27.1423
0.1195	-27.3125	-27.0931	-27.1386
0.12	-27.2812	-27.0897	-27.1334
0.1205	-27.2812	-27.0876	-27.1293
0.121	-27.1562	-27.0851	-27.1238
0.1215	-27.25	-27.0826	-27.12
0.122	-27.125	-27.0804	-27.1139
0.1225	-27.125	-27.0804	-27.1123
0.123	-27.0938	-27.0789	-27.1067
0.1235	-27.2188	-27.0767	-27.103
0.124	-27.0938	-27.0746	-27.1012
0.1245	-26.9062	-27.0727	-27.1002
0.125	-26.8438	-27.0721	-27.0962
0.1255	-27.0312	-27.0721	-27.0953
0.126	-26.875	-27.0702	-27.0944
0.1265	-26.8125	-27.0681	-27.0922
0.127	-26.7188	-27.0684	-27.091
0.1275	-26.5938	-27.0687	-27.0882
0.128	-26.8125	-27.0712	-27.0876
0.1285	-26.5938	-27.0724	-27.0879
0.129	-26.8125	-27.0752	-27.086
0.1295	-26.625	-27.0758	-27.0854
0.13	-26.75	-27.0739	-27.0866
0.1305	-26.75	-27.0715	-27.0863
0.131	-26.8438	-27.0702	-27.0832
0.1315	-26.875	-27.0671	-27.0817
0.132	-26.7812	-27.0625	-27.0829
0.1325	-26.9062	-27.0579	-27.0826
0.133	-26.7812	-27.0538	-27.0838
0.1335	-26.8438	-27.0504	-27.086
0.134	-26.875	-27.0455	-27.0869
0.1345	-26.9062	-27.0412	-27.0897
0.135	-26.8125	-27.0356	-27.0894
0.1355	-26.8438	-27.03	-27.0888
0.136	-26.7812	-27.0241	-27.0897
0.1365	-26.7812	-27.0201	-27.0916
0.137	-26.75	-27.0139	-27.0934
0.1375	-26.7188	-27.0096	-27.0925
0.138	-26.8125	-27.005	-27.0938
0.1385	-26.8438	-26.9994	-27.0959
0.139	-26.7812	-26.9944	-27.0959
0.1395	-26.9062	-26.9882	-27.0931
0.14	-26.9062	-26.9814	-27.0897
0.1405	-27.0938	-26.9743	-27.0876
0.141	-26.9375	-26.9666	-27.0851
0.1415	-26.875	-26.9595	-27.0826
0.142	-26.9375	-26.9527	-27.0804
0.1425	-27	-26.9465	-27.0804
0.143	-26.9688	-26.9387	-27.0789
0.1435	-27.1875	-26.9319	-27.0767
0.144	-27.0625	-26.9226	-27.0746
0.1445	-27.1562	-26.9146	-27.0727
0.145	-27.1562	-26.9053	-27.0721
0.1455	-27.1562	-26.897	-27.0721
0.146	-27.25	-26.8861	-27.0702
0.1465	-27.1562	-26.8762	-27.0681
0.147	-27	-26.8676	-27.0684
0.1475	-27.125	-26.8595	-27.0687
0.148	-27.25	-26.8509	-27.0712
0.1485	-27.0938	-26.8394	-27.0724
0.149	-27.125	-26.8311	-27.0752
0.1495	-27.0625	-26.823	-27.0758
0.15	-27.1562	-26.8144	-27.0739
0.1505	-27.2188	-26.8045	-27.0715
0.151	-26.9062	-26.7933	-27.0702
0.1515	-27	-26.7837	-27.0671
0.152	-26.9375	-26.7754	-27.0625
0.1525	-27.125	-26.7676	-27.0579
0.153	-26.9375	-26.758	-27.0538
0.1535	-27.2188	-26.7497	-27.0504
0.154	-27.2812	-26.7389	-27.0455
0.1545	-27.2188	-26.7283	-27.0412
0.155	-27.0938	-26.7184	-27.0356
0.1555	-27.2812	-26.7104	-27.03
0.156	-27.1875	-26.6993	-27.0241
0.1565	-27.1562	-26.69	-27.0201
0.157	-27.125	-26.6819	-27.0139
0.1575	-27.1562	-26.672	-27.0096
0.158	-27.1875	-26.664	-27.005
0.1585	-27.2812	-26.6538	-26.9994
0.159	-27.1875	-26.6436	-26.9944
0.1595	-27.4375	-26.6343	-26.9882
0.16	-27.375	-26.6231	-26.9814
0.1605	-27.4688	-26.6126	-26.9743
0.161	-27.2812	-26.6006	-26.9666
0.1615	-27.3125	-26.5903	-26.9595
0.162	-27.5	-26.5792	-26.9527
0.1625	-27.4375	-26.5668	-26.9465
0.163	-27.4688	-26.5535	-26.9387
0.1635	-27.5312	-26.5405	-26.9319
0.164	-27.4375	-26.5288	-26.9226
0.1645	-27.5938	-26.5167	-26.9146
0.165	-27.4375	-26.5043	-26.9053
0.1655	-27.5	-26.4929	-26.897
0.166	-27.625	-26.4836	-26.8861
0.1665	-27.6562	-26.4706	-26.8762
0.167	-27.5	-26.457	-26.8676
0.1675	-27.375	-26.4449	-26.8595
0.168	-27.4688	-26.4344	-26.8509
0.1685	-27.4375	-26.4226	-26.8394
0.169	-27.3438	-26.4112	-26.8311
0.1695	-27.1562	-26.4016	-26.823
0.17	-26.9688	-26.3933	-26.8144
0.1705	-27.0625	-26.3855	-26.8045
0.171	-27.0312	-26.3778	-26.7933
0.1715	-26.9062	-26.37	-26.7837
0.172	-27.0312	-26.3654	-26.7754
0.1725	-27.125	-26.3583	-26.7676
0.173	-26.9688	-26.3506	-26.758
0.1735	-26.875	-26.345	-26.7497
0.174	-27	-26.3394	-26.7389
0.1745	-26.9062	-26.3314	-26.7283
0.175	-26.8438	-26.3236	-26.7184
0.1755	-26.8438	-26.314	-26.7104
0.176	-26.8438	-26.3048	-26.6993
0.1765	-26.6562	-26.2946	-26.69
0.177	-26.8438	-26.2859	-26.6819
0.1775	-26.75	-26.2741	-26.672
0.178	-26.8438	-26.2645	-26.664
0.1785	-26.9375	-26.2534	-26.6538
0.179	-26.875	-26.2416	-26.6436
0.1795	-26.875	-26.2314	-26.6343
0.18	-26.4375	-26.2194	-26.6231
0.1805	-26.5	-26.2129	-26.6126
0.181	-26.625	-26.2051	-26.6006
0.1815	-26.5312	-26.1974	-26.5903
0.182	-26.4062	-26.1894	-26.5792
0.1825	-26.3125	-26.1832	-26.5668
0.183	-26.5	-26.1807	-26.5535
0.1835	-26.4375	-26.177	-26.5405
0.184	-26.3438	-26.1739	-26.5288
0.1845	-26.4375	-26.1708	-26.5167
0.185	-26.3438	-26.1689	-26.5043
0.1855	-26.25	-26.1674	-26.4929
0.186	-26.25	-26.1671	-26.4836
0.1865	-26.375	-26.1662	-26.4706
0.187	-26.1562	-26.1649	-26.457
0.1875	-26.3125	-26.1662	-26.4449
0.188	-26.25	-26.1652	-26.4344
0.1885	-26.25	-26.1649	-26.4226
0.189	-26.3438	-26.1649	-26.4112
0.1895	-26.1562	-26.1634	-26.4016
0.19	-26.2188	-26.1643	-26.3933
0.1905	-26.1875	-26.164	-26.3855
0.191	-26.3125	-26.1646	-26.3778
0.1915	-26.2188	-26.1652	-26.37
0.192	-26.1875	-26.1655	-26.3654
0.1925	-26.3125	-26.1655	-26.3583
0.193	-26.2188	-26.1652	-26.3506
0.1935	-26.2812	-26.1649	-26.345
0.194	-26.25	-26.1646	-26.3394
0.1945	-26.25	-26.1646	-26.3314
0.195	-26.2188	-26.1643	-26.3236
0.1955	-26.3125	-26.1627	-26.314
0.196	-26.0625	-26.1621	-26.3048
0.1965	-26.25	-26.164	-26.2946
0.197	-26.2812	-26.1634	-26.2859
0.1975	-26.1875	-26.1618	-26.2741
0.198	-26.25	-26.1621	-26.2645
0.1985	-26.0938	-26.1612	-26.2534
0.199	-26.25	-26.1618	-26.2416
0.1995	-26.3125	-26.16	-26.2314
0.2	-26.1875	-26.1572	-26.2194
0.2005	-26.1562	-26.1578	-26.2129
0.201	-26.0938	-26.1575	-26.2051
0.2015	-25.9375	-26.1559	-26.1974
0.202	-26.1562	-26.1556	-26.1894
0.2025	-26.1562	-26.1535	-26.1832
0.203	-26.1562	-26.1522	-26.1807
0.2035	-26.0938	-26.1501	-26.177
0.204	-26.125	-26.1488	-26.1739
0.2045	-26.2188	-26.1479	-26.1708
0.205	-26.2188	-26.1451	-26.1689
0.2055	-26.2812	-26.1433	-26.1674
0.206	-26.1562	-26.1389	-26.1671
0.2065	-26.25	-26.1361	-26.1662
0.207	-26.3438	-26.1321	-26.1649
0.2075	-26.125	-26.1269	-26.1662
0.208	-26.3438	-26.1244	-26.1652
0.2085	-26.1562	-26.1197	-26.1649
0.209	-26.25	-26.1173	-26.1649
0.2095	-26.25	-26.1157	-26.1634
0.21	-26.3125	-26.1142	-26.1643
0.2105	-26.3125	-26.1108	-26.164
0.211	-26.25	-26.1089	-26.1646
0.2115	-26.25	-26.1049	-26.1652
0.212	-26.1875	-26.1033	-26.1655
0.2125	-26.25	-26.1024	-26.1655
0.213	-26.0938	-26.1009	-26.1652
0.2135	-26.1562	-26.1018	-26.1649
0.214	-26.3438	-26.1006	-26.1646
0.2145	-26.2188	-26.0996	-26.1646
0.215	-26.3438	-26.099	-26.1643
0.2155	-26.2812	-26.0972	-26.1627
0.216	-26.5625	-26.0962	-26.1621
0.2165	-26.3125	-26.0913	-26.164
0.217	-26.2812	-26.0879	-26.1634
0.2175	-26.2812	-26.0842	-26.1618
0.218	-26.3125	-26.0801	-26.1621
0.2185	-26.2812	-26.0764	-26.1612
0.219	-26.2812	-26.073	-26.1618
0.2195	-26.375	-26.0705	-26.16
0.22	-26.3125	-26.0675	-26.1572
0.2205	-26.1875	-26.0647	-26.1578
0.221	-26.2812	-26.0625	-26.1575
0.2215	-26.25	-26.0606	-26.1559
0.222	-26.4375	-26.0569	-26.1556
0.2225	-26.3125	-26.0511	-26.1535
0.223	-26.3438	-26.0458	-26.1522
0.2235	-26.4062	-26.0402	-26.1501
0.224	-26.3125	-26.0347	-26.1488
0.2245	-26.1875	-26.0297	-26.1479
0.225	-26.125	-26.0266	-26.1451
0.2255	-25.875	-26.0257	-26.1433
0.226	-25.9062	-26.0266	-26.1389
0.2265	-25.8125	-26.026	-26.1361
0.227	-25.7812	-26.0272	-26.1321
0.2275	-25.6562	-26.0297	-26.1269
0.228	-25.7812	-26.0312	-26.1244
0.2285	-25.7188	-26.0337	-26.1197
0.229	-25.75	-26.0343	-26.1173
0.2295	-25.8438	-26.0343	-26.1157
0.23	-25.6562	-26.0331	-26.1142
0.2305	-25.7812	-26.0325	-26.1108
0.231	-25.7188	-26.0303	-26.1089
0.2315	-25.8438	-26.0291	-26.1049
0.232	-25.7188	-26.0272	-26.1033
0.2325	-25.7812	-26.0254	-26.1024
0.233	-26.0625	-26.0226	-26.1009
0.2335	-26.125	-26.0158	-26.1018
0.234	-26.125	-26.0084	-26.1006
0.2345	-26.0312	-26.0019	-26.0996
0.235	-26.25	-25.9963	-26.099
0.2355	-26.1875	-25.9889	-26.0972
0.236	-26.2188	-25.9824	-26.0962
0.2365	-26.1562	-25.9756	-26.0913
0.237	-26.25	-25.9681	-26.0879
0.2375	-26.2812	-25.961	-26.0842
0.238	-26.2188	-25.9539	-26.0801
0.2385	-26.2188	-25.9455	-26.0764
0.239	-26.25	-25.9372	-26.073
0.2395	-26.1875	-25.9251	-26.0705
0.24	-26.25	-25.9146	-26.0675
0.2405	-26.1875	-25.9035	-26.0647
0.241	-26.25	-25.8914	-26.0625
0.2415	-26.375	-25.8793	-26.0606
0.242	-26.25	-25.8657	-26.0569
0.2425	-26.1875	-25.8537	-26.0511
0.243	-26.2812	-25.8428	-26.0458
0.2435	-26.1875	-25.8283	-26.0402
0.244	-26.25	-25.8156	-26.0347
0.2445	-26.25	-25.8032	-26.0297
0.245	-26.2188	-25.7902	-26.0266
0.2455	-26.0625	-25.7778	-26.0257
0.246	-26.25	-25.7679	-26.0266
0.2465	-26.25	-25.7556	-26.026
0.247	-26.1875	-25.7413	-26.0272
0.2475	-26.125	-25.7277	-26.0297
0.248	-26.2188	-25.716	-26.0312
0.2485	-26.1562	-25.7005	-26.0337
0.249	-26.1562	-25.6863	-26.0343
0.2495	-26.0625	-25.673	-26.0343
0.25	-26.0312	-25.6597	-26.0331
0.2505	-26.25	-25.6451	-26.0325
0.251	-26.125	-25.629	-26.0303
0.2515	-25.9375	-25.6142	-26.0291
0.252	-25.9062	-25.6021	-26.0272
0.2525	-25.9375	-25.5894	-26.0254
0.253	-26.0312	-25.5774	-26.0226
0.2535	-25.9375	-25.5628	-26.0158
0.254	-25.9688	-25.5489	-26.0084
0.2545	-26.0312	-25.535	-26.0019
0.255	-25.9375	-25.5189	-25.9963
0.2555	-26.0312	-25.5071	-25.9889
0.256	-25.8438	-25.4923	-25.9824
0.2565	-25.875	-25.4808	-25.9756
0.257	-25.8438	-25.4688	-25.9681
0.2575	-25.8125	-25.457	-25.961
0.258	-25.875	-25.4459	-25.9539
0.2585	-25.875	-25.4347	-25.9455
0.259	-25.9062	-25.4236	-25.9372
0.2595	-26.0938	-25.4093	-25.9251
0.26	-26.0938	-25.3948	-25.9146
0.2605	-25.9688	-25.3787	-25.9035
0.261	-26.125	-25.3642	-25.8914
0.2615	-25.8438	-25.3475	-25.8793
0.262	-26.0938	-25.3332	-25.8657
0.2625	-26.0938	-25.3165	-25.8537
0.263	-26.0938	-25.2992	-25.8428
0.2635	-26.1875	-25.2828	-25.8283
0.264	-26.0312	-25.2667	-25.8156
0.2645	-26.25	-25.2519	-25.8032
0.265	-26.1562	-25.2358	-25.7902
0.2655	-26.1562	-25.2181	-25.7778
0.266	-26.1875	-25.2024	-25.7679
0.2665	-26.0625	-25.1844	-25.7556
0.267	-25.9688	-25.1686	-25.7413
0.2675	-25.9062	-25.1547	-25.7277
0.268	-25.875	-25.1383	-25.716
0.2685	-25.9375	-25.1231	-25.7005
0.269	-25.9375	-25.1064	-25.6863
0.2695	-26.0312	-25.0897	-25.673
0.27	-26.0625	-25.0743	-25.6597
0.2705	-26.0312	-25.0582	-25.6451
0.271	-25.9688	-25.043	-25.629
0.2715	-26.0938	-25.0291	-25.6142
0.272	-25.875	-25.0155	-25.6021
0.2725	-25.8438	-25.0022	-25.5894
0.273	-25.7812	-24.9907	-25.5774
0.2735	-25.7812	-24.9777	-25.5628
0.274	-25.8438	-24.9635	-25.5489
0.2745	-25.8125	-24.9502	-25.535
0.275	-25.875	-24.9363	-25.5189
0.2755	-26.0312	-24.9214	-25.5071
0.276	-25.9688	-24.9044	-25.4923
0.2765	-25.8438	-24.8889	-25.4808
0.277	-25.9375	-24.8753	-25.4688
0.2775	-26.0312	-24.8617	-25.457
0.278	-25.8125	-24.8456	-25.4459
0.2785	-26.0312	-24.8308	-25.4347
0.279	-25.7812	-24.8125	-25.4236
0.2795	-25.75	-24.7952	-25.4093
0.28	-25.7188	-24.7772	-25.3948
0.2805	-25.5938	-24.7608	-25.3787
0.281	-25.5625	-24.7435	-25.3642
0.2815	-25.5938	-24.7256	-25.3475
0.282	-25.6562	-24.7073	-25.3332
0.2825	-25.5312	-24.6881	-25.3165
0.283	-25.5	-24.6711	-25.2992
0.2835	-25.375	-24.6544	-25.2828
0.284	-25.375	-24.6371	-25.2667
0.2845	-25.4688	-24.6222	-25.2519
0.285	-25.4688	-24.6049	-25.2358
0.2855	-25.5	-24.5891	-25.2181
0.286	-25.5312	-24.5739	-25.2024
0.2865	-25.5312	-24.5585	-25.1844
0.287	-25.4062	-24.5421	-25.1686
0.2875	-25.5312	-24.526	-25.1547
0.288	-25.5625	-24.5108	-25.1383
0.2885	-25.375	-24.4957	-25.1231
0.289	-25.375	-24.4805	-25.1064
0.2895	-25.0312	-24.4688	-25.0897
0.29	-25.125	-24.461	-25.0743
0.2905	-25.125	-24.4517	-25.0582
0.291	-24.9688	-24.4406	-25.043
0.2915	-25.0312	-24.4332	-25.0291
0.292	-25	-24.4273	-25.0155
0.2925	-25.0312	-24.4208	-25.0022
0.293	-25.0938	-24.4134	-24.9907
0.2935	-24.8125	-24.4059	-24.9777
0.294	-24.9062	-24.401	-24.9635
0.2945	-25	-24.396	-24.9502
0.295	-24.9375	-24.3902	-24.9363
0.2955	-24.9688	-24.3861	-24.9214
0.296	-25.0625	-24.3815	-24.9044
0.2965	-25	-24.3753	-24.8889
0.297	-24.8125	-24.3707	-24.8753
0.2975	-24.8125	-24.3666	-24.8617
0.298	-24.9375	-24.3642	-24.8456
0.2985	-24.6562	-24.362	-24.8308
0.299	-24.7188	-24.362	-24.8125
0.2995	-24.8125	-24.3598	-24.7952
0.3	-24.7188	-24.3586	-24.7772
0.3005	-24.5625	-24.358	-24.7608
0.301	-24.625	-24.3601	-24.7435
0.3015	-24.625	-24.3614	-24.7256
0.302	-24.7188	-24.3617	-24.7073
0.3025	-24.625	-24.3623	-24.6881
0.303	-24.7188	-24.3654	-24.6711
0.3035	-24.5625	-24.366	-24.6544
0.304	-24.5312	-24.3688	-24.6371
0.3045	-24.5625	-24.3725	-24.6222
0.305	-24.4062	-24.375	-24.6049
0.3055	-24.75	-24.379	-24.5891
0.306	-24.5312	-24.3812	-24.5739
0.3065	-24.6875	-24.3852	-24.5585
0.307	-24.6562	-24.3883	-24.5421
0.3075	-24.6562	-24.3911	-24.526
0.308	-24.6875	-24.3926	-24.5108
0.3085	-24.75	-24.3945	-24.4957
0.309	-24.75	-24.3954	-24.4805
0.3095	-24.4688	-24.397	-24.4688
0.31	-24.625	-24.4013	-24.461
0.3105	-24.4688	-24.4053	-24.4517
0.311	-24.5	-24.4121	-24.4406
0.3115	-24.4375	-24.4177	-24.4332
0.312	-24.4062	-24.4239	-24.4273
0.3125	-24.4062	-24.4332	-24.4208
0.313	-24.3438	-24.4409	-24.4134
0.3135	-24.4375	-24.4496	-24.4059
0.314	-24.5625	-24.4564	-24.401
0.3145	-24.5312	-24.4598	-24.396
0.315	-24.625	-24.4635	-24.3902
0.3155	-24.375	-24.4666	-24.3861
0.316	-24.5625	-24.4731	-24.3815
0.3165	-24.375	-24.4774	-24.3753
0.317	-24.4688	-24.4839	-24.3707
0.3175	-24.5625	-24.4892	-24.3666
0.318	-24.25	-24.4935	-24.3642
0.3185	-24.3438	-24.5009	-24.362
0.319	-24.25	-24.508	-24.362
0.3195	-24.25	-24.5155	-24.3598
0.32	-24.4688	-24.5232	-24.3586
0.3205	-24.4375	-24.5282	-24.358
0.321	-24.5	-24.5365	-24.3601
0.3215	-24.5625	-24.5427	-24.3614
0.322	-24.7188	-24.5492	-24.3617
0.3225	-24.5312	-24.5532	-24.3623
0.323	-24.6875	-24.5597	-24.3654
0.3235	-24.4688	-24.5653	-24.366
0.324	-24.3438	-24.5733	-24.3688
0.3245	-24.5	-24.5848	-24.3725
0.325	-24.4062	-24.5938	-24.375
0.3255	-24.375	-24.6052	-24.379
0.326	-24.3125	-24.6179	-24.3812
0.3265	-24.4062	-24.6306	-24.3852
0.327	-24.4688	-24.6417	-24.3883
0.3275	-24.5625	-24.6522	-24.3911
0.328	-24.4062	-24.6621	-24.3926
0.3285	-24.3125	-24.6733	-24.3945
0.329	-24.1875	-24.685	-24.3954
0.3295	-24.0312	-24.6983	-24.397
0.33	-23.9375	-24.715	-24.4013
0.3305	-24.0625	-24.7321	-24.4053
0.331	-23.8438	-24.7472	-24.4121
0.3315	-23.75	-24.7636	-24.4177
0.332	-23.75	-24.7831	-24.4239
0.3325	-23.7188	-24.8026	-24.4332
0.333	-23.8125	-24.8221	-24.4409
0.3335	-23.8125	-24.84	-24.4496
0.334	-23.625	-24.8567	-24.4564
0.3345	-23.875	-24.8765	-24.4598
0.335	-23.7188	-24.8933	-24.4635
0.3355	-23.875	-24.9127	-24.4666
0.336	-23.9688	-24.9295	-24.4731
0.3365	-23.9688	-24.9462	-24.4774
0.337	-23.875	-24.9638	-24.4839
0.3375	-23.7812	-24.9821	-24.4892
0.338	-24	-25.0028	-24.4935
0.3385	-24.0312	-25.0204	-24.5009
0.339	-23.8438	-25.0381	-24.508
0.3395	-24.1875	-25.0572	-24.5155
0.34	-24.25	-25.0733	-24.5232
0.3405	-24.1875	-25.0885	-24.5282
0.341	-24	-25.1058	-24.5365
0.3415	-24.2188	-25.1259	-24.5427
0.342	-24.4375	-25.1426	-24.5492
0.3425	-24.3438	-25.1584	-24.5532
0.343	-24.2812	-25.1757	-24.5597
0.3435	-24.3438	-25.1931	-24.5653
0.344	-24.3125	-25.2082	-24.5733
0.3445	-24.4062	-25.224	-24.5848
0.345	-24.4062	-25.2395	-24.5938
0.3455	-24.5312	-25.2556	-24.6052
0.346	-24.5	-25.2704	-24.6179
0.3465	-24.4375	-25.2847	-24.6306
0.347	-24.5312	-25.3011	-24.6417
0.3475	-24.4062	-25.3165	-24.6522
0.348	-24.5625	-25.332	-24.6621
0.3485	-24.7188	-25.3478	-24.6733
0.349	-24.6562	-25.3592	-24.685
0.3495	-24.5	-25.3722	-24.6983
0.35	-24.6875	-25.3877	-24.715
0.3505	-24.6562	-25.401	-24.7321
0.351	-24.7812	-25.4155	-24.7472
0.3515	-24.75	-25.4285	-24.7636
0.352	-24.6562	-25.4425	-24.7831
0.3525	-24.7812	-25.4576	-24.8026
0.353	-24.9375	-25.4694	-24.8221
0.3535	-24.7812	-25.4796	-24.84
0.354	-24.8438	-25.4923	-24.8567
0.3545	-24.9062	-25.5046	-24.8765
0.355	-24.8125	-25.5167	-24.8933
0.3555	-24.8125	-25.5291	-24.9127
0.356	-24.9688	-25.5418	-24.9295
0.3565	-24.9375	-25.5511	-24.9462
0.357	-25	-25.5622	-24.9638
0.3575	-24.9375	-25.5736	-24.9821
0.358	-24.8125	-25.5832	-25.0028
0.3585	-24.875	-25.5931	-25.0204
0.359	-24.8438	-25.603	-25.0381
0.3595	-24.9062	-25.6123	-25.0572
0.36	-24.9062	-25.6216	-25.0733
0.3605	-25.0312	-25.6315	-25.0885
0.361	-25.1562	-25.6402	-25.1058
0.3615	-25.0625	-25.6491	-25.1259
0.362	-25.0625	-25.6609	-25.1426
0.3625	-25.3438	-25.6717	-25.1584
0.363	-25.1875	-25.6788	-25.1757
0.3635	-25.2188	-25.6903	-25.1931
0.364	-25.125	-25.6996	-25.2082
0.3645	-24.9062	-25.7073	-25.224
0.365	-24.9062	-25.7166	-25.2395
0.3655	-24.9375	-25.7271	-25.2556
0.366	-25.0312	-25.7389	-25.2704
0.3665	-25	-25.7481	-25.2847
0.367	-25.0312	-25.7584	-25.3011
0.3675	-25	-25.7701	-25.3165
0.368	-25	-25.7816	-25.332
0.3685	-25	-25.7921	-25.3478
0.369	-25.0625	-25.8004	-25.3592
0.3695	-25	-25.8082	-25.3722
0.37	-25.0312	-25.8165	-25.3877
0.3705	-24.9688	-25.8236	-25.401
0.371	-25.2812	-25.832	-25.4155
0.3715	-25.125	-25.8376	-25.4285
0.372	-25.2188	-25.8438	-25.4425
0.3725	-25.125	-25.8506	-25.4576
0.373	-25.1875	-25.8558	-25.4694
0.3735	-25.25	-25.862	-25.4796
0.374	-25.2812	-25.8657	-25.4923
0.3745	-25.5	-25.8691	-25.5046
0.375	-25.4062	-25.8713	-25.5167
0.3755	-25.5625	-25.8728	-25.5291
0.376	-25.6562	-25.8741	-25.5418
0.3765	-25.5938	-25.8762	-25.5511
0.377	-25.5312	-25.8781	-25.5622
0.3775	-25.5312	-25.8821	-25.5736
0.378	-25.5625	-25.8852	-25.5832
0.3785	-25.5312	-25.888	-25.5931
0.379	-25.5	-25.8914	-25.603
0.3795	-25.5312	-25.8957	-25.6123
0.38	-25.7188	-25.8991	-25.6216
0.3805	-25.6562	-25.901	-25.6315
0.381	-25.5938	-25.905	-25.6402
0.3815	-25.5	-25.9078	-25.6491
0.382	-25.7188	-25.9134	-25.6609
0.3825	-25.7188	-25.9149	-25.6717
0.383	-25.6875	-25.9162	-25.6788
0.3835	-25.625	-25.9165	-25.6903
0.384	-25.5	-25.9189	-25.6996
0.3845	-25.625	-25.9214	-25.7073
0.385	-25.5625	-25.923	-25.7166
0.3855	-25.6875	-25.9242	-25.7271
0.386	-25.5625	-25.9248	-25.7389
0.3865	-25.6562	-25.9279	-25.7481
0.387	-25.75	-25.9301	-25.7584
0.3875	-25.7188	-25.9295	-25.7701
0.388	-25.875	-25.9307	-25.7816
0.3885	-25.7812	-25.9279	-25.7921
0.389	-25.8125	-25.927	-25.8004
0.3895	-25.7812	-25.9273	-25.8082
0.39	-25.8125	-25.9267	-25.8165
0.3905	-25.7812	-25.927	-25.8236
0.391	-25.9375	-25.9264	-25.832
0.3915	-26.0312	-25.9236	-25.8376
0.392	-25.9062	-25.9202	-25.8438
0.3925	-26.0312	-25.9189	-25.8506
0.393	-26.0938	-25.9174	-25.8558
0.3935	-26.0312	-25.9137	-25.862
0.394	-25.875	-25.909	-25.8657
0.3945	-25.9062	-25.9044	-25.8691
0.395	-25.9688	-25.9007	-25.8713
0.3955	-26.0312	-25.896	-25.8728
0.396	-26.0312	-25.8911	-25.8741
0.3965	-25.9375	-25.8843	-25.8762
0.397	-26.0938	-25.8796	-25.8781
0.3975	-26.0938	-25.8713	-25.8821
0.398	-25.9688	-25.8642	-25.8852
0.3985	-26.1562	-25.8586	-25.888
0.399	-25.875	-25.8506	-25.8914
0.3995	-25.9688	-25.8456	-25.8957
0.4	-26.0625	-25.8388	-25.8991
0.4005	-26.0312	-25.8301	-25.901
0.401	-26.125	-25.8233	-25.905
0.4015	-26.0938	-25.8144	-25.9078
0.402	-26.1562	-25.8057	-25.9134
0.4025	-26.1875	-25.7967	-25.9149
0.403	-25.9688	-25.7884	-25.9162
0.4035	-25.9688	-25.7803	-25.9165
0.404	-26.0625	-25.772	-25.9189
0.4045	-26.0938	-25.7627	-25.9214
0.405	-26.125	-25.7531	-25.923
0.4055	-26.0625	-25.7413	-25.9242
0.406	-26.0938	-25.7314	-25.9248
0.4065	-25.9062	-25.7209	-25.9279
0.407	-26.0625	-25.7119	-25.9301
0.4075	-26.1562	-25.702	-25.9295
0.408	-25.9062	-25.6912	-25.9307
0.4085	-25.8125	-25.6825	-25.9279
0.409	-25.875	-25.672	-25.927
0.4095	-25.7812	-25.6612	-25.9273
0.41	-25.8438	-25.6498	-25.9267
0.4105	-25.9062	-25.6386	-25.927
0.411	-25.9062	-25.6247	-25.9264
0.4115	-26.0625	-25.6108	-25.9236
0.412	-26.25	-25.595	-25.9202
0.4125	-26.1562	-25.5761	-25.9189
0.413	-26.0625	-25.5588	-25.9174
0.4135	-26.3438	-25.5427	-25.9137
0.414	-26.1562	-25.5223	-25.909
0.4145	-25.9062	-25.504	-25.9044
0.415	-25.8438	-25.487	-25.9007
0.4155	-25.9688	-25.4722	-25.896
0.416	-26.125	-25.4548	-25.8911
0.4165	-25.9688	-25.4356	-25.8843
0.417	-26.0312	-25.4186	-25.8796
0.4175	-26.2188	-25.401	-25.8713
0.418	-26.1562	-25.3824	-25.8642
0.4185	-26.0625	-25.3639	-25.8586
0.419	-25.8438	-25.349	-25.8506
0.4195	-25.8438	-25.3332	-25.8456
0.42	-25.8438	-25.319	-25.8388
0.4205	-25.75	-25.3054	-25.8301
0.421	-25.8125	-25.2912	-25.8233
0.4215	-25.8438	-25.2769	-25.8144
0.422	-25.75	-25.263	-25.8057
0.4225	-25.9062	-25.2494	-25.7967
0.423	-25.6562	-25.2339	-25.7884
0.4235	-25.8125	-25.2206	-25.7803
0.424	-25.625	-25.2082	-25.772
0.4245	-25.625	-25.1955	-25.7627
0.425	-25.7188	-25.1844	-25.7531
0.4255	-25.5625	-25.1708	-25.7413
0.426	-25.6875	-25.1584	-25.7314
0.4265	-25.875	-25.1463	-25.7209
0.427	-25.7812	-25.1324	-25.7119
0.4275	-25.9375	-25.1188	-25.702
0.428	-25.8438	-25.1037	-25.6912
0.4285	-25.8438	-25.09	-25.6825
0.429	-25.875	-25.077	-25.672
0.4295	-25.9375	-25.064	-25.6612
0.43	-25.875	-25.0495	-25.6498
0.4305	-25.9062	-25.0359	-25.6386
0.431	-26.0625	-25.0223	-25.6247
0.4315	-25.875	-25.0056	-25.6108
0.432	-26.0625	-24.9895	-25.595
0.4325	-25.875	-24.9709	-25.5761
0.433	-25.8438	-24.9536	-25.5588
0.4335	-25.7188	-24.9353	-25.5427
0.434	-25.875	-24.9183	-25.5223
0.4345	-25.75	-24.8994	-25.504
0.435	-25.7812	-24.8818	-25.487
0.4355	-25.6875	-24.8657	-25.4722
0.436	-25.75	-24.8496	-25.4548
0.4365	-25.875	-24.8317	-25.4356
0.437	-25.875	-24.8134	-25.4186
0.4375	-25.6875	-24.7958	-25.401
0.438	-25.8438	-24.7803	-25.3824
0.4385	-25.5938	-24.7618	-25.3639
0.439	-25.6875	-24.7463	-25.349
0.4395	-25.8438	-24.7302	-25.3332
0.44	-25.7188	-24.7107	-25.319
0.4405	-25.8438	-24.6934	-25.3054
0.441	-25.7188	-24.6754	-25.2912
0.4415	-25.6562	-24.659	-25.2769
0.442	-25.6875	-24.6426	-25.263
0.4425	-25.7812	-24.6287	-25.2494
0.443	-25.875	-24.6123	-25.2339
0.4435	-25.7188	-24.5941	-25.2206
0.444	-25.5625	-24.5774	-25.2082
0.4445	-25.4062	-24.5613	-25.1955
0.445	-25.5312	-24.5467	-25.1844
0.4455	-25.5	-24.5303	-25.1708
0.446	-25.5312	-24.5149	-25.1584
0.4465	-25.3438	-24.5009	-25.1463
0.447	-25.4688	-24.4851	-25.1324
0.4475	-25.25	-24.4688	-25.1188
0.448	-25.375	-24.4539	-25.1037
0.4485	-25.4062	-24.4381	-25.09
0.449	-25.3438	-24.4236	-25.077
0.4495	-25.375	-24.4075	-25.064
0.45	-25.2812	-24.392	-25.0495
0.4505	-25.1875	-24.375	-25.0359
0.451	-25.3438	-24.3595	-25.0223
0.4515	-25.2188	-24.3438	-25.0056
0.452	-25.2188	-24.3298	-24.9895
0.4525	-25.25	-24.3156	-24.9709
0.453	-25.3438	-24.302	-24.9536
0.4535	-25.1562	-24.2865	-24.9353
0.454	-25.125	-24.2735	-24.9183
0.4545	-25.125	-24.2593	-24.8994
0.455	-25.125	-24.2466	-24.8818
0.4555	-24.9375	-24.2314	-24.8657
0.456	-25.0625	-24.2181	-24.8496
0.4565	-25.0312	-24.203	-24.8317
0.457	-25	-24.1897	-24.8134
0.4575	-25.0625	-24.1782	-24.7958
0.458	-25.0625	-24.1677	-24.7803
0.4585	-25.0312	-24.1559	-24.7618
0.459	-24.75	-24.1454	-24.7463
0.4595	-24.7812	-24.1364	-24.7302
0.46	-24.625	-24.1265	-24.7107
0.4605	-24.7188	-24.1176	-24.6934
0.461	-24.5	-24.1098	-24.6754
0.4615	-24.5	-24.1002	-24.659
0.462	-24.4688	-24.0894	-24.6426
0.4625	-24.3438	-24.0777	-24.6287
0.463	-24.4062	-24.0696	-24.6123
0.4635	-24.4375	-24.0569	-24.5941
0.464	-24.2812	-24.0458	-24.5774
0.4645	-24.3125	-24.0365	-24.5613
0.465	-24.1875	-24.026	-24.5467
0.4655	-24.3438	-24.0173	-24.5303
0.466	-24.2188	-24.0068	-24.5149
0.4665	-24.1875	-23.9972	-24.5009
0.467	-24.25	-23.9882	-24.4851
0.4675	-24.25	-23.9771	-24.4688
0.468	-24.3438	-23.9672	-24.4539
0.4685	-24.2812	-23.9533	-24.4381
0.469	-24.5625	-23.9415	-24.4236
0.4695	-24.25	-23.9261	-24.4075
0.47	-24.4062	-23.9137	-24.392
0.4705	-24.4688	-23.9004	-24.375
0.471	-24.3125	-23.8858	-24.3595
0.4715	-24.375	-23.8716	-24.3438
0.472	-24.4375	-23.8567	-24.3298
0.4725	-24.375	-23.841	-24.3156
0.473	-24.3438	-23.8243	-24.302
0.4735	-24.3125	-23.8088	-24.2865
0.474	-24.5625	-23.7933	-24.2735
0.4745	-24.3438	-23.7757	-24.2593
0.475	-24.5	-23.7587	-24.2466
0.4755	-24.3438	-23.7401	-24.2314
0.476	-24.3125	-23.7206	-24.2181
0.4765	-24.4688	-23.703	-24.203
0.477	-24.4688	-23.6819	-24.1897
0.4775	-24.4062	-23.6621	-24.1782
0.478	-24.4062	-23.6414	-24.1677
0.4785	-24.4688	-23.621	-24.1559
0.479	-24.5312	-23.5984	-24.1454
0.4795	-24.5625	-23.5739	-24.1364
0.48	-24.4688	-23.548	-24.1265
0.4805	-24.5	-23.5232	-24.1176
0.481	-24.5312	-23.4957	-24.1098
0.4815	-24.375	-23.4691	-24.1002
0.482	-24.25	-23.4437	-24.0894
0.4825	-24.1875	-23.4199	-24.0777
0.483	-24.125	-23.3951	-24.0696
0.4835	-24	-23.3716	-24.0569
0.484	-24	-23.3499	-24.0458
0.4845	-23.9688	-23.3292	-24.0365
0.485	-23.9688	-23.3072	-24.026
0.4855	-24.1562	-23.2865	-24.0173
0.486	-24.0625	-23.2652	-24.0068
0.4865	-23.9375	-23.2457	-23.9972
0.487	-24.0312	-23.2265	-23.9882
0.4875	-24.0938	-23.2051	-23.9771
0.488	-24.125	-23.1853	-23.9672
0.4885	-23.9688	-23.1658	-23.9533
0.489	-24.0312	-23.1476	-23.9415
0.4895	-24.0625	-23.1306	-23.9261
0.49	-23.875	-23.1132	-23.9137
0.4905	-23.9688	-23.0987	-23.9004
0.491	-24.0312	-23.0826	-23.8858
0.4915	-24.0625	-23.0662	-23.8716
0.492	-24	-23.0495	-23.8567
0.4925	-24.2812	-23.0316	-23.841
0.493	-24.125	-23.0124	-23.8243
0.4935	-24.0312	-22.992	-23.8088
0.494	-24.0312	-22.9743	-23.7933
0.4945	-23.9375	-22.9551	-23.7757
0.495	-23.9375	-22.9372	-23.7587
0.4955	-23.875	-22.9186	-23.7401
0.496	-23.9375	-22.9016	-23.7206
0.4965	-24.125	-22.8818	-23.703
0.497	-23.75	-22.8601	-23.6819
0.4975	-23.8125	-22.8438	-23.6621
0.498	-23.75	-22.8258	-23.6414
0.4985	-23.7812	-22.8085	-23.621
0.499	-23.9375	-22.7912	-23.5984
0.4995	-23.7188	-22.7726	-23.5739
0.5	-23.8125	-22.7546	-23.548
0.5005	-23.5625	-22.7351	-23.5232
0.501	-23.625	-22.7203	-23.4957
0.5015	-23.75	-22.7033	-23.4691
0.502	-23.8125	-22.6856	-23.4437
0.5025	-23.7812	-22.668	-23.4199
0.503	-23.875	-22.6494	-23.3951
0.5035	-23.7812	-22.6309	-23.3716
0.504	-23.8438	-22.6126	-23.3499
0.5045	-23.6875	-22.5941	-23.3292
0.505	-23.8438	-22.5767	-23.3072
0.5055	-23.5938	-22.5572	-23.2865
0.506	-23.5938	-22.5384	-23.2652
0.5065	-23.5312	-22.5201	-23.2457
0.507	-23.6875	-22.5019	-23.2265
0.5075	-23.8438	-22.4821	-23.2051
0.508	-24	-22.4595	-23.1853
0.5085	-23.875	-22.436	-23.1658
0.509	-23.9688	-22.4127	-23.1476
0.5095	-23.8438	-22.3895	-23.1306
0.51	-23.7812	-22.3679	-23.1132
0.5105	-23.7188	-22.3468	-23.0987
0.511	-23.9375	-22.3286	-23.0826
0.5115	-23.5312	-22.3066	-23.0662
0.512	-23.4062	-22.2899	-23.0495
0.5125	-23.2812	-22.2735	-23.0316
0.513	-23.5312	-22.2571	-23.0124
0.5135	-23.125	-22.2386	-22.992
0.514	-23.3125	-22.2231	-22.9743
0.5145	-23.3438	-22.2048	-22.9551
0.515	-23.25	-22.1863	-22.9372
0.5155	-23.3125	-22.1677	-22.9186
0.516	-23.2812	-22.1494	-22.9016
0.5165	-23.25	-22.1318	-22.8818
0.517	-23.2812	-22.1157	-22.8601
0.5175	-23.125	-22.0981	-22.8438
0.518	-23.25	-22.0798	-22.8258
0.5185	-22.9375	-22.064	-22.8085
0.519	-23.0938	-22.0492	-22.7912
0.5195	-23	-22.0347	-22.7726
0.52	-23	-22.0201	-22.7546
0.5205	-23.0625	-22.004	-22.7351
0.521	-23	-21.987	-22.7203
0.5215	-22.875	-21.97	-22.7033
0.522	-22.875	-21.9533	-22.6856
0.5225	-22.8438	-21.9363	-22.668
0.523	-22.6875	-21.9192	-22.6494
0.5235	-22.7812	-21.9028	-22.6309
0.524	-22.75	-21.8846	-22.6126
0.5245	-22.7812	-21.8676	-22.5941
0.525	-22.625	-21.8502	-22.5767
0.5255	-22.625	-21.8357	-22.5572
0.526	-22.375	-21.8178	-22.5384
0.5265	-22.5312	-21.8032	-22.5201
0.527	-22.3438	-21.7856	-22.5019
0.5275	-22.4688	-21.7692	-22.4821
0.528	-22.3125	-21.7537	-22.4595
0.5285	-22.3438	-21.7386	-22.436
0.529	-22.1875	-21.7249	-22.4127
0.5295	-22.0625	-21.7116	-22.3895
0.53	-21.9375	-21.7008	-22.3679
0.5305	-21.9688	-21.6909	-22.3468
0.531	-21.7188	-21.681	-22.3286
0.5315	-21.8438	-21.673	-22.3066
0.532	-21.8125	-21.6621	-22.2899
0.5325	-21.8438	-21.6525	-22.2735
0.533	-21.6875	-21.6414	-22.2571
0.5335	-21.75	-21.6312	-22.2386
0.534	-21.8125	-21.6204	-22.2231
0.5345	-21.9062	-21.6086	-22.2048
0.535	-21.75	-21.5968	-22.1863
0.5355	-21.875	-21.586	-22.1677
0.536	-22	-21.5733	-22.1494
0.5365	-22.0938	-21.5597	-22.1318
0.537	-22	-21.5452	-22.1157
0.5375	-21.875	-21.5331	-22.0981
0.538	-22.0938	-21.5201	-22.0798
0.5385	-22.1562	-21.5071	-22.064
0.539	-22.125	-21.491	-22.0492
0.5395	-22.3125	-21.4743	-22.0347
0.54	-22.3125	-21.4567	-22.0201
0.5405	-22.4062	-21.4372	-22.004
0.541	-22.3438	-21.4165	-21.987
0.5415	-22.375	-21.3967	-21.97
0.542	-22.375	-21.3784	-21.9533
0.5425	-22.1875	-21.3598	-21.9363
0.543	-22.3438	-21.3431	-21.9192
0.5435	-22.0625	-21.3252	-21.9028
0.544	-22.25	-21.3106	-21.8846
0.5445	-22.0938	-21.2933	-21.8676
0.545	-22.125	-21.2778	-21.8502
0.5455	-22.0625	-21.2624	-21.8357
0.546	-22.1562	-21.2463	-21.8178
0.5465	-21.9375	-21.2299	-21.8032
0.547	-21.9375	-21.216	-21.7856
0.5475	-22.0938	-21.1999	-21.7692
0.548	-22	-21.1835	-21.7537
0.5485	-22	-21.1692	-21.7386
0.549	-22.0312	-21.1559	-21.7249
0.5495	-22.0625	-21.142	-21.7116
0.55	-21.9062	-21.129	-21.7008
0.5505	-21.8438	-21.1173	-21.6909
0.551	-22.0625	-21.1058	-21.681
0.5515	-21.9062	-21.0941	-21.673
0.552	-21.9688	-21.0811	-21.6621
0.5525	-22.0312	-21.0687	-21.6525
0.553	-21.9062	-21.0563	-21.6414
0.5535	-22	-21.0449	-21.6312
0.554	-21.9375	-21.0309	-21.6204
0.5545	-21.9688	-21.0201	-21.6086
0.555	-21.9375	-21.0074	-21.5968
0.5555	-21.875	-20.9969	-21.586
0.556	-21.6875	-20.9848	-21.5733
0.5565	-21.75	-20.9749	-21.5597
0.557	-21.6875	-20.9672	-21.5452
0.5575	-21.6875	-20.9598	-21.5331
0.558	-21.5625	-20.9505	-21.5201
0.5585	-21.625	-20.9431	-21.5071
0.559	-21.5312	-20.9356	-21.491
0.5595	-21.625	-20.9295	-21.4743
0.56	-21.6562	-20.9205	-21.4567
0.5605	-21.6562	-20.9097	-21.4372
0.561	-21.875	-20.9001	-21.4165
0.5615	-21.7188	-20.8883	-21.3967
0.562	-21.8438	-20.8772	-21.3784
0.5625	-21.75	-20.8657	-21.3598
0.563	-21.625	-20.8552	-21.3431
0.5635	-21.6562	-20.8456	-21.3252
0.564	-21.5625	-20.836	-21.3106
0.5645	-21.4688	-20.8277	-21.2933
0.565	-21.4688	-20.8196	-21.2778
0.5655	-21.375	-20.8128	-21.2624
0.566	-21.4688	-20.806	-21.2463
0.5665	-21.5	-20.798	-21.2299
0.567	-21.625	-20.7893	-21.216
0.5675	-21.5	-20.7803	-21.1999
0.568	-21.2812	-20.772	-21.1835
0.5685	-21.6562	-20.7642	-21.1692
0.569	-21.4375	-20.7553	-21.1559
0.5695	-21.625	-20.7485	-21.142
0.57	-21.5312	-20.7426	-21.129
0.5705	-21.375	-20.7348	-21.1173
0.571	-21.3438	-20.7287	-21.1058
0.5715	-21.2812	-20.7234	-21.0941
0.572	-21.1875	-20.7188	-21.0811
0.5725	-21.1562	-20.7153	-21.0687
0.573	-21.125	-20.711	-21.0563
0.5735	-21.0312	-20.7076	-21.0449
0.574	-20.9375	-20.7061	-21.0309
0.5745	-21.0312	-20.7048	-21.0201
0.575	-21.0312	-20.703	-21.0074
0.5755	-21.1562	-20.7008	-20.9969
0.576	-20.8125	-20.6949	-20.9848
0.5765	-20.9062	-20.6937	-20.9749
0.577	-20.75	-20.6912	-20.9672
0.5775	-20.6875	-20.69	-20.9598
0.578	-20.9062	-20.6881	-20.9505
0.5785	-20.7812	-20.6866	-20.9431
0.579	-20.9688	-20.6841	-20.9356
0.5795	-20.8438	-20.6813	-20.9295
0.58	-20.9688	-20.6776	-20.9205
0.5805	-20.9375	-20.673	-20.9097
0.581	-20.9688	-20.6711	-20.9001
0.5815	-20.9062	-20.6662	-20.8883
0.582	-20.75	-20.6643	-20.8772
0.5825	-20.8438	-20.6624	-20.8657
0.583	-20.7188	-20.6597	-20.8552
0.5835	-20.6562	-20.6572	-20.8456
0.584	-20.6562	-20.655	-20.836
0.5845	-20.625	-20.6519	-20.8277
0.585	-20.7188	-20.6498	-20.8196
0.5855	-20.6562	-20.6467	-20.8128
0.586	-20.5938	-20.6433	-20.806
0.5865	-20.625	-20.6436	-20.798
0.587	-20.625	-20.6426	-20.7893
0.5875	-20.7812	-20.6426	-20.7803
0.588	-20.5625	-20.6405	-20.772
0.5885	-20.7812	-20.642	-20.7642
0.589	-20.5312	-20.6414	-20.7553
0.5895	-20.4375	-20.6423	-20.7485
0.59	-20.5312	-20.6454	-20.7426
0.5905	-20.3438	-20.6485	-20.7348
0.591	-20.3125	-20.6538	-20.7287
0.5915	-20.3438	-20.6587	-20.7234
0.592	-20.5312	-20.6627	-20.7188
0.5925	-20.5	-20.6646	-20.7153
0.593	-20.5	-20.6677	-20.711
0.5935	-20.5312	-20.6702	-20.7076
0.594	-20.5938	-20.6742	-20.7061
0.5945	-20.5	-20.6776	-20.7048
0.595	-20.5312	-20.6832	-20.703
0.5955	-20.5625	-20.6894	-20.7008
0.596	-20.4375	-20.6949	-20.6949
0.5965	-20.5	-20.702	-20.6937
0.597	-20.5312	-20.7064	-20.6912
0.5975	-20.3125	-20.7123	-20.69
0.598	-20.4375	-20.7212	-20.6881
0.5985	-20.5625	-20.7287	-20.6866
0.599	-20.6562	-20.7367	-20.6841
0.5995	-20.625	-20.7423	-20.6813
0.6	-20.75	-20.7494	-20.6776
0.6005	-20.7188	-20.7553	-20.673
0.601	-20.6875	-20.7621	-20.6711
0.6015	-20.875	-20.7692	-20.6662
0.602	-20.5938	-20.7723	-20.6643
0.6025	-20.7188	-20.7782	-20.6624
0.603	-20.7812	-20.784	-20.6597
0.6035	-20.75	-20.7865	-20.6572
0.604	-20.5938	-20.7908	-20.655
0.6045	-20.8438	-20.7976	-20.6519
0.605	-20.6875	-20.802	-20.6498
0.6055	-20.875	-20.8063	-20.6467
0.606	-20.6562	-20.8097	-20.6433
0.6065	-20.6875	-20.8162	-20.6436
0.607	-20.9688	-20.8193	-20.6426
0.6075	-20.9375	-20.8221	-20.6426
0.608	-20.75	-20.8227	-20.6405
0.6085	-20.8125	-20.8274	-20.642
0.609	-20.875	-20.8308	-20.6414
0.6095	-20.9062	-20.8348	-20.6423
0.61	-20.7188	-20.8376	-20.6454
0.6105	-20.5625	-20.8438	-20.6485
0.611	-20.6875	-20.8521	-20.6538
0.6115	-20.6875	-20.8598	-20.6587
0.612	-20.5938	-20.8645	-20.6627
0.6125	-20.6875	-20.8728	-20.6646
0.613	-20.6875	-20.8818	-20.6677
0.6135	-20.6562	-20.8905	-20.6702
0.614	-20.6875	-20.8991	-20.6742
0.6145	-20.7188	-20.909	-20.6776
0.615	-20.6562	-20.9189	-20.6832
0.6155	-20.7812	-20.9298	-20.6894
0.616	-20.6875	-20.9387	-20.6949
0.6165	-20.6562	-20.9474	-20.702
0.617	-20.625	-20.9564	-20.7064
0.6175	-20.7188	-20.9644	-20.7123
0.618	-20.6562	-20.9743	-20.7212
0.6185	-20.5	-20.9858	-20.7287
0.619	-20.75	-20.9981	-20.7367
0.6195	-20.75	-21.0096	-20.7423
0.62	-21.0312	-21.0195	-20.7494
0.6205	-20.75	-21.0263	-20.7553
0.621	-20.75	-21.0381	-20.7621
0.6215	-20.8125	-21.0507	-20.7692
0.622	-20.8125	-21.061	-20.7723
0.6225	-20.8438	-21.0718	-20.7782
0.623	-20.7188	-21.0817	-20.784
0.6235	-20.7812	-21.0931	-20.7865
0.624	-20.875	-21.1043	-20.7908
0.6245	-20.8125	-21.1123	-20.7976
0.625	-20.8438	-21.1216	-20.802
0.6255	-20.8125	-21.1293	-20.8063
0.626	-20.5625	-21.1374	-20.8097
0.6265	-20.6875	-21.1485	-20.8162
0.627	-20.6562	-21.1587	-20.8193
0.6275	-20.625	-21.1677	-20.8221
0.628	-20.5	-21.1788	-20.8227
0.6285	-20.75	-21.1912	-20.8274
0.629	-20.5312	-21.2002	-20.8308
0.6295	-20.6875	-21.2129	-20.8348
0.63	-20.4688	-21.224	-20.8376
0.6305	-20.5	-21.2386	-20.8438
0.631	-20.75	-21.2525	-20.8521
0.6315	-20.4688	-21.263	-20.8598
0.632	-20.7188	-21.2757	-20.8645
0.6325	-20.5625	-21.2847	-20.8728
0.633	-20.5625	-21.2952	-20.8818
0.6335	-20.4688	-21.3048	-20.8905
0.634	-20.4375	-21.3162	-20.8991
0.6345	-20.3438	-21.3298	-20.909
0.635	-20.4062	-21.3447	-20.9189
0.6355	-20.4062	-21.3608	-20.9298
0.636	-20.3125	-21.3778	-20.9387
0.6365	-20.625	-21.3942	-20.9474
0.637	-20.5312	-21.4093	-20.9564
0.6375	-20.625	-21.4254	-20.9644
0.638	-20.5625	-21.4397	-20.9743
0.6385	-20.7188	-21.4554	-20.9858
0.639	-20.7188	-21.4706	-20.9981
0.6395	-20.625	-21.4842	-21.0096
0.64	-20.75	-21.4994	-21.0195
0.6405	-20.8438	-21.5136	-21.0263
0.641	-20.875	-21.5285	-21.0381
0.6415	-20.8125	-21.5433	-21.0507
0.642	-20.75	-21.5575	-21.061
0.6425	-20.7188	-21.5718	-21.0718
0.643	-20.8125	-21.5854	-21.0817
0.6435	-20.75	-21.5987	-21.0931
0.644	-20.9375	-21.6142	-21.1043
0.6445	-20.9375	-21.6281	-21.1123
0.645	-21.0625	-21.6414	-21.1216
0.6455	-21.1562	-21.6532	-21.1293
0.646	-21.125	-21.6634	-21.1374
0.6465	-21.1562	-21.6761	-21.1485
0.647	-20.9375	-21.6884	-21.1587
0.6475	-21.125	-21.7033	-21.1677
0.648	-21.2188	-21.7163	-21.1788
0.6485	-21.1875	-21.7293	-21.1912
0.649	-21.375	-21.7416	-21.2002
0.6495	-21.2188	-21.7531	-21.2129
0.65	-21.3438	-21.767	-21.224
0.6505	-21.3438	-21.7791	-21.2386
0.651	-21.4062	-21.7921	-21.2525
0.6515	-21.4062	-21.8045	-21.263
0.652	-21.1875	-21.8162	-21.2757
0.6525	-21.1875	-21.8304	-21.2847
0.653	-21.3125	-21.8438	-21.2952
0.6535	-21.0312	-21.8564	-21.3048
0.654	-21.1875	-21.8713	-21.3162
0.6545	-21.2812	-21.8827	-21.3298
0.655	-21.2812	-21.8933	-21.3447
0.6555	-21.125	-21.9038	-21.3608
0.656	-21.2188	-21.9162	-21.3778
0.6565	-21.3125	-21.9264	-21.3942
0.657	-21	-21.9372	-21.4093
0.6575	-21.25	-21.9524	-21.4254
0.658	-21	-21.9635	-21.4397
0.6585	-21.2188	-21.978	-21.4554
0.659	-21.1562	-21.9901	-21.4706
0.6595	-21.2812	-22.0037	-21.4842
0.66	-21.1875	-22.0167	-21.4994
0.6605	-21.3438	-22.0306	-21.5136
0.661	-21.4062	-22.0427	-21.5285
0.6615	-21.4688	-22.0545	-21.5433
0.662	-21.1562	-22.0653	-21.5575
0.6625	-21.4375	-22.077	-21.5718
0.663	-21.5938	-22.0897	-21.5854
0.6635	-21.5625	-22.0981	-21.5987
0.664	-21.5312	-22.1077	-21.6142
0.6645	-21.6875	-22.1185	-21.6281
0.665	-21.7188	-22.1275	-21.6414
0.6655	-21.75	-22.1368	-21.6532
0.666	-21.6875	-22.1451	-21.6634
0.6665	-21.5625	-22.1556	-21.6761
0.667	-21.5625	-22.1668	-21.6884
0.6675	-21.4375	-22.1782	-21.7033
0.668	-21.7188	-22.1915	-21.7163
0.6685	-21.8125	-22.2027	-21.7293
0.669	-21.75	-22.2135	-21.7416
0.6695	-21.9062	-22.2246	-21.7531
0.67	-21.75	-22.2345	-21.767
0.6705	-21.7188	-22.2444	-21.7791
0.671	-21.9375	-22.255	-21.7921
0.6715	-22.0312	-22.2645	-21.8045
0.672	-21.8438	-22.2732	-21.8162
0.6725	-21.9062	-22.2837	-21.8304
0.673	-21.8438	-22.2942	-21.8438
0.6735	-21.875	-22.3041	-21.8564
0.674	-21.9062	-22.314	-21.8713
0.6745	-21.6875	-22.3243	-21.8827
0.675	-21.75	-22.3348	-21.8933
0.6755	-21.625	-22.3447	-21.9038
0.676	-21.625	-22.3577	-21.9162
0.6765	-21.6875	-22.3688	-21.9264
0.677	-21.7188	-22.379	-21.9372
0.6775	-21.5625	-22.3899	-21.9524
0.678	-21.75	-22.4013	-21.9635
0.6785	-21.75	-22.4112	-21.978
0.679	-21.6562	-22.4211	-21.9901
0.6795	-21.8125	-22.4307	-22.0037
0.68	-21.8125	-22.4397	-22.0167
0.6805	-21.9375	-22.4496	-22.0306
0.681	-21.9062	-22.4576	-22.0427
0.6815	-21.8125	-22.466	-22.0545
0.682	-21.75	-22.474	-22.0653
0.6825	-21.625	-22.483	-22.077
0.683	-21.625	-22.4926	-22.0897
0.6835	-21.5312	-22.5031	-22.0981
0.684	-21.625	-22.5145	-22.1077
0.6845	-21.8125	-22.5229	-22.1185
0.685	-21.8438	-22.5316	-22.1275
0.6855	-22.0312	-22.5399	-22.1368
0.686	-22.125	-22.5458	-22.1451
0.6865	-21.9688	-22.5511	-22.1556
0.687	-22.1562	-22.5579	-22.1668
0.6875	-22.1562	-22.5625	-22.1782
0.688	-22.0625	-22.5675	-22.1915
0.6885	-22.1562	-22.5739	-22.2027
0.689	-22.25	-22.5795	-22.2135
0.6895	-22.0938	-22.5845	-22.2246
0.69	-22.1562	-22.5888	-22.2345
0.6905	-22.1875	-22.5919	-22.2444
0.691	-22.3438	-22.5919	-22.255
0.6915	-22.375	-22.5891	-22.2645
0.692	-22.25	-22.5873	-22.2732
0.6925	-22.1875	-22.5842	-22.2837
0.693	-22.0938	-22.5829	-22.2942
0.6935	-22.1562	-22.5814	-22.3041
0.694	-22.3125	-22.5804	-22.314
0.6945	-22.3438	-22.5774	-22.3243
0.695	-22.2812	-22.5743	-22.3348
0.6955	-22.25	-22.5724	-22.3447
0.696	-22.1875	-22.5696	-22.3577
0.6965	-22.4062	-22.5696	-22.3688
0.697	-22.4062	-22.5656	-22.379
0.6975	-22.4375	-22.5606	-22.3899
0.698	-22.4375	-22.5557	-22.4013
0.6985	-22.5312	-22.5507	-22.4112
0.699	-22.4375	-22.5442	-22.4211
0.6995	-22.5312	-22.5384	-22.4307
0.7	-22.625	-22.53	-22.4397
0.7005	-22.5625	-22.5223	-22.4496
0.701	-22.6562	-22.5167	-22.4576
0.7015	-22.6562	-22.5093	-22.466
0.702	-22.5938	-22.5022	-22.474
0.7025	-22.625	-22.4966	-22.483
0.703	-22.5312	-22.4901	-22.4926
0.7035	-22.5938	-22.4855	-22.5031
0.704	-22.5312	-22.4802	-22.5145
0.7045	-22.3438	-22.4749	-22.5229
0.705	-22.3438	-22.4728	-22.5316
0.7055	-22.3438	-22.4703	-22.5399
0.706	-22.375	-22.4672	-22.5458
0.7065	-22.25	-22.4644	-22.5511
0.707	-22.4062	-22.4626	-22.5579
0.7075	-22.5312	-22.4588	-22.5625
0.708	-22.375	-22.4527	-22.5675
0.7085	-22.4688	-22.4483	-22.5739
0.709	-22.4375	-22.4449	-22.5795
0.7095	-22.5312	-22.4425	-22.5845
0.71	-22.5938	-22.4394	-22.5888
0.7105	-22.5938	-22.4347	-22.5919
0.711	-22.5625	-22.4301	-22.5919
0.7115	-22.5938	-22.427	-22.5891
0.712	-22.5625	-22.4236	-22.5873
0.7125	-22.3438	-22.4192	-22.5842
0.713	-22.7188	-22.4183	-22.5829
0.7135	-22.4375	-22.4127	-22.5814
0.714	-22.5312	-22.4106	-22.5804
0.7145	-22.625	-22.41	-22.5774
0.715	-22.5938	-22.4062	-22.5743
0.7155	-22.6562	-22.4059	-22.5724
0.716	-22.5938	-22.4053	-22.5696
0.7165	-22.75	-22.4047	-22.5696
0.717	-22.6875	-22.4007	-22.5656
0.7175	-22.7188	-22.397	-22.5606
0.718	-22.7812	-22.3942	-22.5557
0.7185	-22.8438	-22.3892	-22.5507
0.719	-22.9062	-22.383	-22.5442
0.7195	-22.875	-22.3784	-22.5384
0.72	-22.9062	-22.3719	-22.53
0.7205	-22.75	-22.366	-22.5223
0.721	-22.7812	-22.3626	-22.5167
0.7215	-22.9062	-22.3589	-22.5093
0.722	-22.9062	-22.3543	-22.5022
0.7225	-22.9062	-22.349	-22.4966
0.723	-22.9688	-22.3431	-22.4901
0.7235	-22.8438	-22.3369	-22.4855
0.724	-22.875	-22.3323	-22.4802
0.7245	-22.9375	-22.328	-22.4749
0.725	-22.75	-22.3243	-22.4728
0.7255	-22.75	-22.3227	-22.4703
0.726	-22.9375	-22.3196	-22.4672
0.7265	-22.75	-22.315	-22.4644
0.727	-22.7188	-22.3113	-22.4626
0.7275	-22.8125	-22.3085	-22.4588
0.728	-22.7188	-22.3048	-22.4527
0.7285	-22.75	-22.3001	-22.4483
0.729	-22.75	-22.2964	-22.4449
0.7295	-22.625	-22.2927	-22.4425
0.73	-22.7188	-22.2918	-22.4394
0.7305	-22.8125	-22.2908	-22.4347
0.731	-22.75	-22.2896	-22.4301
0.7315	-22.75	-22.2884	-22.427
0.732	-22.625	-22.2877	-22.4236
0.7325	-22.6562	-22.2905	-22.4192
0.733	-22.5938	-22.2912	-22.4183
0.7335	-22.6875	-22.2918	-22.4127
0.734	-22.6875	-22.2939	-22.4106
0.7345	-22.4688	-22.2949	-22.41
0.735	-22.6875	-22.2995	-22.4062
0.7355	-22.6875	-22.3038	-22.4059
0.736	-22.625	-22.3069	-22.4053
0.7365	-22.6562	-22.3119	-22.4047
0.737	-22.6562	-22.3165	-22.4007
0.7375	-22.625	-22.3193	-22.397
0.738	-22.6562	-22.323	-22.3942
0.7385	-22.7188	-22.328	-22.3892
0.739	-22.7188	-22.3314	-22.383
0.7395	-22.75	-22.3354	-22.3784
0.74	-22.5312	-22.3376	-22.3719
0.7405	-22.4688	-22.3428	-22.366
0.741	-22.1875	-22.3478	-22.3626
0.7415	-22.0625	-22.3555	-22.3589
0.742	-22.1875	-22.3642	-22.3543
0.7425	-21.9375	-22.3713	-22.349
0.743	-22.0625	-22.379	-22.3431
0.7435	-21.9375	-22.3861	-22.3369
0.744	-22.0625	-22.3948	-22.3323
0.7445	-22	-22.4035	-22.328
0.745	-22.0312	-22.4121	-22.3243
0.7455	-22.0938	-22.4211	-22.3227
0.746	-21.9688	-22.4288	-22.3196
0.7465	-22.1875	-22.4387	-22.315
0.747	-22	-22.4455	-22.3113
0.7475	-21.9062	-22.4533	-22.3085
0.748	-21.9375	-22.4607	-22.3048
0.7485	-21.9375	-22.4672	-22.3001
0.749	-21.875	-22.4752	-22.2964
0.7495	-21.8438	-22.4833	-22.2927
0.75	-21.6875	-22.4926	-22.2918
0.7505	-21.8438	-22.5025	-22.2908
0.751	-22	-22.5102	-22.2896
0.7515	-21.9062	-22.5164	-22.2884
0.752	-21.9375	-22.522	-22.2877
0.7525	-22.0312	-22.5285	-22.2905
0.753	-21.9688	-22.534	-22.2912
0.7535	-22.0625	-22.5396	-22.2918
0.754	-22.0625	-22.5433	-22.2939
0.7545	-22	-22.547	-22.2949
0.755	-22.125	-22.5504	-22.2995
0.7555	-22.0938	-22.5548	-22.3038
0.756	-22.0312	-22.5572	-22.3069
0.7565	-22.0938	-22.561	-22.3119
0.757	-22.0625	-22.5653	-22.3165
0.7575	-22.0312	-22.5712	-22.3193
0.758	-21.9062	-22.5755	-22.323
0.7585	-21.9375	-22.5829	-22.328
0.759	-22.125	-22.5888	-22.3314
0.7595	-22.1875	-22.5944	-22.3354
0.76	-22.2188	-22.5993	-22.3376
0.7605	-22.125	-22.6052	-22.3428
0.761	-22.125	-22.6117	-22.3478
0.7615	-22.25	-22.616	-22.3555
0.762	-22.25	-22.6216	-22.3642
0.7625	-22.125	-22.6284	-22.3713
0.763	-22.25	-22.6368	-22.379
0.7635	-22.1562	-22.6426	-22.3861
0.764	-22.2188	-22.6516	-22.3948
0.7645	-22.4688	-22.6584	-22.4035
0.765	-22.25	-22.6649	-22.4121
0.7655	-22.5625	-22.6714	-22.4211
0.766	-22.5938	-22.6754	-22.4288
0.7665	-22.5312	-22.6788	-22.4387
0.767	-22.3438	-22.6813	-22.4455
0.7675	-22.3125	-22.6866	-22.4533
0.768	-22.4375	-22.6921	-22.4607
0.7685	-22.2812	-22.6968	-22.4672
0.769	-22.2188	-22.702	-22.4752
0.7695	-22.4375	-22.7082	-22.4833
0.77	-22.2188	-22.7123	-22.4926
0.7705	-22.3125	-22.7181	-22.5025
0.771	-22.4062	-22.7237	-22.5102
0.7715	-22.4062	-22.729	-22.5164
0.772	-22.4375	-22.7333	-22.522
0.7725	-22.375	-22.7382	-22.5285
0.773	-22.3125	-22.7432	-22.534
0.7735	-22.3438	-22.7497	-22.5396
0.774	-22.375	-22.7553	-22.5433
0.7745	-22.4375	-22.7608	-22.547
0.775	-22.5625	-22.7658	-22.5504
0.7755	-22.5938	-22.7698	-22.5548
0.776	-22.4375	-22.7735	-22.5572
0.7765	-22.4688	-22.7791	-22.561
0.777	-22.375	-22.7831	-22.5653
0.7775	-22.4375	-22.7881	-22.5712
0.778	-22.4375	-22.7933	-22.5755
0.7785	-22.25	-22.7964	-22.5829
0.779	-22.375	-22.8017	-22.5888
0.7795	-22.375	-22.8054	-22.5944
0.78	-22.5312	-22.8097	-22.5993
0.7805	-22.625	-22.8131	-22.6052
0.781	-22.6875	-22.8156	-22.6117
0.7815	-22.625	-22.8168	-22.616
0.782	-22.6875	-22.8202	-22.6216
0.7825	-22.9062	-22.8218	-22.6284
0.783	-22.7188	-22.8224	-22.6368
0.7835	-22.6562	-22.8239	-22.6426
0.784	-22.9062	-22.8258	-22.6516
0.7845	-22.7812	-22.8258	-22.6584
0.785	-22.9375	-22.827	-22.6649
0.7855	-23.125	-22.8258	-22.6714
0.786	-23	-22.8239	-22.6754
0.7865	-23.125	-22.8212	-22.6788
0.787	-23.125	-22.8168	-22.6813
0.7875	-22.9375	-22.8119	-22.6866
0.788	-23	-22.8085	-22.6921
0.7885	-23.1562	-22.8032	-22.6968
0.789	-23.0625	-22.7946	-22.702
0.7895	-23.125	-22.7881	-22.7082
0.79	-22.9688	-22.7806	-22.7123
0.7905	-23.0625	-22.7766	-22.7181
0.791	-22.9688	-22.7683	-22.7237
0.7915	-22.9688	-22.7621	-22.729
0.792	-22.9375	-22.7562	-22.7333
0.7925	-22.9062	-22.7509	-22.7382
0.793	-22.7188	-22.7447	-22.7432
0.7935	-22.7812	-22.7413	-22.7497
0.794	-22.8125	-22.7358	-22.7553
0.7945	-22.9375	-22.7302	-22.7608
0.795	-22.875	-22.7237	-22.7658
0.7955	-22.9375	-22.7178	-22.7698
0.796	-22.875	-22.711	-22.7735
0.7965	-22.9688	-22.7045	-22.7791
0.797	-22.875	-22.6962	-22.7831
0.7975	-22.7812	-22.6903	-22.7881
0.798	-22.6562	-22.6835	-22.7933
0.7985	-22.5938	-22.6788	-22.7964
0.799	-22.75	-22.6733	-22.8017
0.7995	-22.6875	-22.6674	-22.8054
0.8	-22.7812	-22.6606	-22.8097
0.8005	-22.6875	-22.6535	-22.8131
0.801	-22.625	-22.6488	-22.8156
0.8015	-22.625	-22.6445	-22.8168
0.802	-22.4688	-22.6402	-22.8202
0.8025	-22.5938	-22.6364	-22.8218
0.803	-22.5938	-22.6327	-22.8224
0.8035	-22.5312	-22.6293	-22.8239
0.804	-22.4375	-22.6259	-22.8258
0.8045	-22.4375	-22.6225	-22.8258
0.805	-22.3438	-22.6182	-22.827
0.8055	-22.5625	-22.6154	-22.8258
0.806	-22.3438	-22.6114	-22.8239
0.8065	-22.4062	-22.608	-22.8212
0.807	-22.5312	-22.6049	-22.8168
0.8075	-22.6562	-22.6006	-22.8119
0.808	-22.4688	-22.5931	-22.8085
0.8085	-22.6562	-22.5888	-22.8032
0.809	-22.5312	-22.5814	-22.7946
0.8095	-22.6875	-22.5777	-22.7881
0.81	-22.6875	-22.5702	-22.7806
0.8105	-22.8125	-22.5647	-22.7766
0.811	-22.7812	-22.5554	-22.7683
0.8115	-22.5625	-22.5473	-22.7621
0.812	-22.8125	-22.5421	-22.7562
0.8125	-22.9375	-22.5359	-22.7509
0.813	-22.9688	-22.5266	-22.7447
0.8135	-22.8438	-22.5189	-22.7413
0.814	-23.0625	-22.5114	-22.7358
0.8145	-22.9062	-22.5012	-22.7302
0.815	-23.125	-22.4932	-22.7237
0.8155	-22.9062	-22.4839	-22.7178
0.816	-22.9688	-22.4768	-22.711
0.8165	-22.9375	-22.4691	-22.7045
0.817	-22.7812	-22.4635	-22.6962
0.8175	-22.875	-22.4576	-22.6903
0.818	-22.875	-22.4542	-22.6835
0.8185	-22.9062	-22.4493	-22.6788
0.819	-22.8125	-22.4462	-22.6733
0.8195	-22.8438	-22.4421	-22.6674
0.82	-22.8438	-22.439	-22.6606
0.8205	-22.8125	-22.4369	-22.6535
0.821	-22.875	-22.4335	-22.6488
0.8215	-22.9375	-22.4304	-22.6445
0.822	-22.8438	-22.427	-22.6402
0.8225	-22.9375	-22.4245	-22.6364
0.823	-22.875	-22.4233	-22.6327
0.8235	-22.9688	-22.4223	-22.6293
0.824	-22.9062	-22.4192	-22.6259
0.8245	-22.9375	-22.4168	-22.6225
0.825	-22.9375	-22.4146	-22.6182
0.8255	-22.9688	-22.4124	-22.6154
0.826	-22.9688	-22.4097	-22.6114
0.8265	-23	-22.4069	-22.608
0.827	-22.875	-22.4041	-22.6049
0.8275	-22.875	-22.4016	-22.6006
0.828	-22.9688	-22.4016	-22.5931
0.8285	-22.75	-22.3982	-22.5888
0.829	-22.7812	-22.3988	-22.5814
0.8295	-22.75	-22.3994	-22.5777
0.83	-22.8125	-22.4007	-22.5702
0.8305	-22.875	-22.4016	-22.5647
0.831	-22.875	-22.4025	-22.5554
0.8315	-22.8125	-22.4035	-22.5473
0.832	-22.9688	-22.4056	-22.5421
0.8325	-22.8438	-22.4066	-22.5359
0.833	-22.9688	-22.409	-22.5266
0.8335	-22.875	-22.409	-22.5189
0.834	-22.8438	-22.409	-22.5114
0.8345	-22.9062	-22.4093	-22.5012
0.835	-22.9062	-22.409	-22.4932
0.8355	-22.8125	-22.4078	-22.4839
0.836	-22.9375	-22.4075	-22.4768
0.8365	-22.7188	-22.405	-22.4691
0.837	-22.6875	-22.4062	-22.4635
0.8375	-22.625	-22.4081	-22.4576
0.838	-22.5938	-22.4106	-22.4542
0.8385	-22.4688	-22.4131	-22.4493
0.839	-22.2812	-22.4155	-22.4462
0.8395	-22.4062	-22.4196	-22.4421
0.84	-22.375	-22.4202	-22.439
0.8405	-22.5625	-22.4196	-22.4369
0.841	-22.2188	-22.418	-22.4335
0.8415	-22.3438	-22.4192	-22.4304
0.842	-22.375	-22.4177	-22.427
0.8425	-22.4062	-22.4143	-22.4245
0.843	-22.2812	-22.4115	-22.4233
0.8435	-22.375	-22.4078	-22.4223
0.844	-22.2188	-22.4035	-22.4192
0.8445	-22.25	-22.3998	-22.4168
0.845	-22.2812	-22.397	-22.4146
0.8455	-22.2812	-22.3933	-22.4124
0.846	-22.25	-22.3892	-22.4097
0.8465	-22.2188	-22.3861	-22.4069
0.847	-22.125	-22.3827	-22.4041
0.8475	-22.2812	-22.38	-22.4016
0.848	-22.0938	-22.3747	-22.4016
0.8485	-22.1875	-22.3722	-22.3982
0.849	-22.0312	-22.3688	-22.3988
0.8495	-22.1562	-22.367	-22.3994
0.85	-22	-22.3642	-22.4007
0.8505	-22.0625	-22.3632	-22.4016
0.851	-22.2188	-22.3608	-22.4025
0.8515	-22.1875	-22.3586	-22.4035
0.852	-22.1875	-22.3558	-22.4056
0.8525	-22.0938	-22.353	-22.4066
0.853	-22.2188	-22.3533	-22.409
0.8535	-22.25	-22.3515	-22.409
0.854	-22.1875	-22.3484	-22.409
0.8545	-22.0938	-22.3453	-22.4093
0.855	-22	-22.3438	-22.409
0.8555	-22.0625	-22.3428	-22.4078
0.856	-22.1562	-22.341	-22.4075
0.8565	-22	-22.3369	-22.405
0.857	-22.0938	-22.3366	-22.4062
0.8575	-22.0938	-22.3345	-22.4081
0.858	-21.9062	-22.3323	-22.4106
0.8585	-22.0312	-22.3314	-22.4131
0.859	-21.9062	-22.3304	-22.4155
0.8595	-22.1562	-22.3304	-22.4196
0.86	-21.9375	-22.3255	-22.4202
0.8605	-22.125	-22.323	-22.4196
0.861	-21.875	-22.3181	-22.418
0.8615	-21.9688	-22.3162	-22.4192
0.862	-22.0312	-22.3153	-22.4177
0.8625	-22.1875	-22.3147	-22.4143
0.863	-22	-22.3103	-22.4115
0.8635	-22.1875	-22.3091	-22.4078
0.864	-22.0938	-22.3026	-22.4035
0.8645	-22.0312	-22.2989	-22.3998
0.865	-22.0938	-22.2936	-22.397
0.8655	-22.1875	-22.2859	-22.3933
0.866	-22.1875	-22.2772	-22.3892
0.8665	-22.1875	-22.2655	-22.3861
0.867	-22.375	-22.2553	-22.3827
0.8675	-22.1875	-22.2416	-22.38
0.868	-22.5312	-22.229	-22.3747
0.8685	-22.375	-22.2132	-22.3722
0.869	-22.5938	-22.1977	-22.3688
0.8695	-22.4062	-22.1804	-22.367
0.87	-22.5312	-22.1631	-22.3642
0.8705	-22.625	-22.146	-22.3632
0.871	-22.4688	-22.1275	-22.3608
0.8715	-22.5625	-22.1092	-22.3586
0.872	-22.5938	-22.09	-22.3558
0.8725	-22.5938	-22.0693	-22.353
0.873	-22.8125	-22.0492	-22.3533
0.8735	-22.7812	-22.0269	-22.3515
0.874	-22.6562	-22.0068	-22.3484
0.8745	-22.6562	-21.9873	-22.3453
0.875	-22.7188	-21.9672	-22.3438
0.8755	-22.7188	-21.9471	-22.3428
0.876	-22.6875	-21.9245	-22.341
0.8765	-22.6875	-21.9032	-22.3369
0.877	-22.7188	-21.8796	-22.3366
0.8775	-22.625	-21.8571	-22.3345
0.878	-22.875	-21.836	-22.3323
0.8785	-22.625	-21.811	-22.3314
0.879	-22.8125	-21.7862	-22.3304
0.8795	-22.8438	-21.7568	-22.3304
0.88	-22.875	-21.7262	-22.3255
0.8805	-22.9062	-21.694	-22.323
0.881	-22.9688	-21.6593	-22.3181
0.8815	-22.9688	-21.6238	-22.3162
0.882	-23.0312	-21.5863	-22.3153
0.8825	-23.0625	-21.5467	-22.3147
0.883	-23.0938	-21.504	-22.3103
0.8835	-22.9688	-21.4573	-22.3091
0.884	-22.875	-21.4078	-22.3026
0.8845	-22.875	-21.3592	-22.2989
0.885	-22.875	-21.3103	-22.2936
0.8855	-22.7812	-21.2614	-22.2859
0.886	-22.7812	-21.2129	-22.2772
0.8865	-22.6875	-21.1637	-22.2655
0.887	-22.8438	-21.1166	-22.2553
0.8875	-22.875	-21.0681	-22.2416
0.888	-22.875	-21.0189	-22.229
0.8885	-22.8438	-20.9706	-22.2132
0.889	-22.7188	-20.9196	-22.1977
0.8895	-22.6875	-20.8691	-22.1804
0.89	-22.4688	-20.8202	-22.1631
0.8905	-22.3125	-20.7754	-22.146
0.891	-22.4062	-20.7311	-22.1275
0.8915	-22.3438	-20.686	-22.1092
0.892	-22.1875	-20.6417	-22.09
0.8925	-22.0312	-20.5984	-22.0693
0.893	-22.125	-20.5579	-22.0492
0.8935	-21.9062	-20.5149	-22.0269
0.894	-21.9375	-20.4749	-22.0068
0.8945	-21.8438	-20.4335	-21.9873
0.895	-21.9688	-20.396	-21.9672
0.8955	-21.9062	-20.3567	-21.9471
0.896	-21.875	-20.3175	-21.9245
0.8965	-21.9375	-20.2778	-21.9032
0.897	-21.875	-20.2382	-21.8796
0.8975	-21.8438	-20.2002	-21.8571
0.898	-21.75	-20.1618	-21.836
0.8985	-21.8438	-20.1225	-21.811
0.899	-21.8438	-20.0835	-21.7862
0.8995	-21.8438	-20.0458	-21.7568
0.9	-21.875	-20.0065	-21.7262
0.9005	-21.9062	-19.9678	-21.694
0.901	-21.8125	-19.9291	-21.6593
0.9015	-22	-19.8914	-21.6238
0.902	-21.9062	-19.8537	-21.5863
0.9025	-21.9062	-19.8168	-21.5467
0.903	-22.125	-19.7803	-21.504
0.9035	-22.0312	-19.7416	-21.4573
0.904	-21.9375	-19.703	-21.4078
0.9045	-21.875	-19.6643	-21.3592
0.905	-21.9375	-19.6272	-21.3103
0.9055	-21.9062	-19.5894	-21.2614
0.906	-21.875	-19.5517	-21.2129
0.9065	-21.75	-19.5149	-21.1637
0.907	-21.9688	-19.4796	-21.1166
0.9075	-21.875	-19.44	-21.0681
0.908	-21.875	-19.4025	-21.0189
0.9085	-21.8125	-19.3645	-20.9706
0.909	-21.9375	-19.3277	-20.9196
0.9095	-21.9062	-19.289	-20.8691
0.91	-21.6562	-19.2519	-20.8202
0.9105	-21.6875	-19.2144	-20.7754
0.911	-21.625	-19.1788	-20.7311
0.9115	-21.6875	-19.1442	-20.686
0.912	-21.875	-19.1083	-20.6417
0.9125	-21.9688	-19.0712	-20.5984
0.913	-21.75	-19.034	-20.5579
0.9135	-21.875	-18.9985	-20.5149
0.914	-21.5312	-18.9635	-20.4749
0.9145	-21.7188	-18.9304	-20.4335
0.915	-21.5	-18.8942	-20.396
0.9155	-21.3125	-18.8605	-20.3567
0.916	-21.3125	-18.8286	-20.3175
0.9165	-21	-18.7976	-20.2778
0.917	-21.1562	-18.7698	-20.2382
0.9175	-21	-18.7382	-20.2002
0.918	-20.9062	-18.7092	-20.1618
0.9185	-20.9375	-18.6813	-20.1225
0.919	-20.8125	-18.6513	-20.0835
0.9195	-20.8438	-18.6231	-20.0458
0.92	-20.6562	-18.5922	-20.0065
0.9205	-20.8125	-18.564	-19.9678
0.921	-20.75	-18.5337	-19.9291
0.9215	-20.625	-18.5059	-19.8914
0.922	-20.625	-18.4787	-19.8537
0.9225	-20.5	-18.452	-19.8168
0.923	-20.5625	-18.4267	-19.7803
0.9235	-20.5625	-18.4016	-19.7416
0.924	-20.75	-18.3765	-19.703
0.9245	-20.6875	-18.3496	-19.6643
0.925	-20.625	-18.3233	-19.6272
0.9255	-20.6875	-18.2958	-19.5894
0.926	-20.4375	-18.2689	-19.5517
0.9265	-20.5312	-18.2441	-19.5149
0.927	-20.3125	-18.2172	-19.4796
0.9275	-20.4375	-18.1931	-19.44
0.928	-20.5	-18.1689	-19.4025
0.9285	-20.3438	-18.1442	-19.3645
0.929	-20.125	-18.1179	-19.3277
0.9295	-19.8438	-18.0959	-19.289
0.93	-19.75	-18.0767	-19.2519
0.9305	-19.625	-18.0588	-19.2144
0.931	-19.4062	-18.0427	-19.1788
0.9315	-19.375	-18.0294	-19.1442
0.932	-19.1875	-18.0176	-19.1083
0.9325	-19.0312	-18.0114	-19.0712
0.933	-18.75	-18.0059	-19.034
0.9335	-18.375	-18.0028	-18.9985
0.934	-17.9688	-18.0043	-18.9635
0.9345	-17.9688	-18.0093	-18.9304
0.935	-17.9375	-18.0152	-18.8942
0.9355	-17.9375	-18.0204	-18.8605
0.936	-17.875	-18.0248	-18.8286
0.9365	-17.8125	-18.0297	-18.7976
0.937	-17.9375	-18.0359	-18.7698
0.9375	-17.9375	-18.0442	-18.7382
0.938	-17.9062	-18.0504	-18.7092
0.9385	-18	-18.0572	-18.6813
0.939	-17.6875	-18.0628	-18.6513
0.9395	-17.625	-18.0705	-18.6231
0.94	-17.75	-18.0789	-18.5922
0.9405	-17.9375	-18.0854	-18.564
0.941	-17.8438	-18.0885	-18.5337
0.9415	-17.8438	-18.0947	-18.5059
0.942	-17.875	-18.1018	-18.4787
0.9425	-17.8125	-18.108	-18.452
0.943	-17.9375	-18.1145	-18.4267
0.9435	-17.7812	-18.1207	-18.4016
0.944	-17.875	-18.1275	-18.3765
0.9445	-17.75	-18.1327	-18.3496
0.945	-18.0625	-18.1386	-18.3233
0.9455	-18	-18.1417	-18.2958
0.946	-17.9375	-18.1451	-18.2689
0.9465	-17.875	-18.1513	-18.2441
0.947	-17.9375	-18.1566	-18.2172
0.9475	-18.0312	-18.1609	-18.1931
0.948	-17.9688	-18.164	-18.1689
0.9485	-17.7812	-18.1689	-18.1442
0.949	-17.9062	-18.1764	-18.1179
0.9495	-18.0312	-18.1816	-18.0959
0.95	-17.875	-18.185	-18.0767
0.9505	-17.9688	-18.1894	-18.0588
0.951	-18	-18.1912	-18.0427
0.9515	-18	-18.1912	-18.0294
0.952	-18.1875	-18.1928	-18.0176
0.9525	-18.1875	-18.1909	-18.0114
0.953	-18.2188	-18.1897	-18.0059
0.9535	-18.2188	-18.1869	-18.0028
0.954	-18.125	-18.186	-18.0043
0.9545	-18.0312	-18.1835	-18.0093
0.955	-18.125	-18.1838	-18.0152
0.9555	-18.125	-18.1822	-18.0204
0.956	-18.0938	-18.181	-18.0248
0.9565	-18.1562	-18.1779	-18.0297
0.957	-18.1875	-18.1745	-18.0359
0.9575	-17.9688	-18.1705	-18.0442
0.958	-18.0938	-18.1662	-18.0504
0.9585	-18.0312	-18.1631	-18.0572
0.959	-18.0938	-18.1603	-18.0628
0.9595	-18.0312	-18.1569	-18.0705
0.96	-18.1562	-18.1532	-18.0789
0.9605	-17.875	-18.1498	-18.0854
0.961	-18.0938	-18.1494	-18.0885
0.9615	-18.125	-18.1451	-18.0947
0.962	-18.0625	-18.142	-18.1018
0.9625	-18.125	-18.1411	-18.108
0.963	-18.2188	-18.1386	-18.1145
0.9635	-18.1562	-18.1346	-18.1207
0.964	-18.3438	-18.1309	-18.1275
0.9645	-18.1875	-18.1259	-18.1327
0.965	-18.0625	-18.1235	-18.1386
0.9655	-18.0938	-18.1228	-18.1417
0.966	-18.0938	-18.1219	-18.1451
0.9665	-18.1875	-18.121	-18.1513
0.967	-18.1875	-18.1185	-18.1566
0.9675	-17.9688	-18.1139	-18.1609
0.968	-18.0625	-18.1132	-18.164
0.9685	-18.0938	-18.1114	-18.1689
0.969	-17.9062	-18.1098	-18.1764
0.9695	-17.9688	-18.1098	-18.1816
0.97	-17.7188	-18.1114	-18.185
0.9705	-17.8125	-18.1154	-18.1894
0.971	-17.75	-18.1194	-18.1912
0.9715	-17.9375	-18.1216	-18.1912
0.972	-17.875	-18.1238	-18.1928
0.9725	-17.9375	-18.125	-18.1909
0.973	-17.9375	-18.1256	-18.1897
0.9735	-18.0312	-18.1269	-18.1869
0.974	-18.0312	-18.13	-18.186
0.9745	-18.0312	-18.1312	-18.1835
0.975	-18.0312	-18.1327	-18.1838
0.9755	-17.8438	-18.1358	-18.1822
0.976	-17.9688	-18.1405	-18.181
0.9765	-17.9375	-18.1423	-18.1779
0.977	-17.8125	-18.1454	-18.1745
0.9775	-17.875	-18.1507	-18.1705
0.978	-18	-18.1575	-18.1662
0.9785	-18	-18.1621	-18.1631
0.979	-17.6875	-18.1665	-18.1603
0.9795	-17.9062	-18.1733	-18.1569
0.98	-17.9062	-18.1773	-18.1532
0.9805	-17.9375	-18.1798	-18.1498
0.981	-18	-18.1804	-18.1494
0.9815	-18.0625	-18.1816	-18.1451
0.982	-18.1875	-18.181	-18.142
0.9825	-18.5625	-18.1813	-18.1411
0.983	-18.4688	-18.1788	-18.1386
0.9835	-18.4375	-18.1733	-18.1346
0.984	-18.5312	-18.1686	-18.1309
0.9845	-18.4688	-18.1634	-18.1259
0.985	-18.5625	-18.159	-18.1235
0.9855	-18.4688	-18.1507	-18.1228
0.986	-18.375	-18.1429	-18.1219
0.9865	-18.375	-18.1374	-18.121
0.987	-18.4375	-18.1318	-18.1185
0.9875	-18.7812	-18.1238	-18.1139
0.988	-18.5625	-18.1142	-18.1132
0.9885	-18.5938	-18.1071	-18.1114
0.989	-18.5625	-18.0981	-18.1098
0.9895	-18.4688	-18.0888	-18.1098
0.99	-18.4688	-18.0804	-18.1114
0.9905	-18.4062	-18.0705	-18.1154
0.991	-18.25	-18.0613	-18.1194
0.9915	-18.4688	-18.0541	-18.1216
0.992	-18.5625	-18.0436	-18.1238
0.9925	-18.5	-18.0309	-18.125
0.993	-18.4688	-18.0195	-18.1256
0.9935	-18.5625	-18.0068	-18.1269
0.994	-18.4688	-17.9926	-18.13
0.9945	-18.4062	-17.979	-18.1312
0.995	-18.3438	-17.9653	-18.1327
0.9955	-18.375	-17.9517	-18.1358
0.996	-18.3438	-17.9384	-18.1405
0.9965	-18.5625	-17.9245	-18.1423
0.997	-18.4062	-17.9097	-18.1454
0.9975	-18.375	-17.8982	-18.1507
0.998	-18.3438	-17.8843	-18.1575
0.9985	-18.4688	-17.8713	-18.1621
0.999	-18.5312	-17.8586	-18.1665
[truncated: 54,041 more rows]

## Sheet: ED Figure 7F
no light	no light	no light	no light	no light	no light	no light	no light	no light	no light	no light	no light	no light	no light	no light	no light	no light	no light	with light	with light	with light	with light	with light	with light	with light	with light	with light	with light	with light	with light	with light	with light	with light	with light	with light	with light
-0.527426	-0.144356	0.41802	-0.19703	-0.0934654	0.090396	0.099901	-0.0471287	-0.0808911	-0.257525	-0.0476238	0.530198	-0.10505	-0.00990099	-0.0252475	-0.0266337	-0.0837624	0.201782																				Column B	with light
-0.548416	-0.0852475	0.377525	-0.127723	-0.136535	0.0810891	-0.029802	0.0128713	-0.0654455	-0.220099	-0.0228713	0.545347	0.0942574	0.0957426	0.295644	0.192376	-0.0262376	0.13396	-0.354554	-0.18	0.365545	-0.621386	-0.100693	0.166436	0.0886139	1.22624	2.09337	0.461584	0.431089	0.52297	0.517921	0.225248	0.32802	0.0145545	1.09812	3.98277		vs.	vs,
-0.45099	-0.0564356	0.517921	-0.167723	-0.170891	0.0448515	-0.00069307	0.102178	-0.0514852	-0.33297	-0.246535	0.55802	0.0447525	0.0725743	0.138416	-0.0573267	-0.0594059	-0.0754455	-0.317723	-0.262871	0.30802	-0.724653	-0.00970297	0.126832	0.189802	1.35337	2.03188	0.370891	0.530297	0.456832	0.571683	0.243465	0.51604	-0.0157426	1.02911	4.35465		Column A	no light
-0.652277	0.0626733	0.480495	-0.257723	-0.0120792	0.128317	0.070297	-0.0760396	0.0933663	-0.543663	0.0588119	0.410099	-0.0162376	0.226931	0.135644	-0.059505	0.00663366	0.205743	-0.280891	0.115743	0.402673	-0.447723	-0.0242574	0.0809901	0.120396	1.23297	2.21594	0.319307	0.509307	0.453069	0.56604	0.234554	0.744059	0.0477228	1.28	4.25406
-0.451782	0.089604	0.601881	-0.197426	-0.104257	0.221188	0.029901	0.0758416	0.199505	-0.252475	0.0263366	0.581188	-0.00693069	0.0824752	-0.115941	-0.150792	-0.0648515	0.0482178	-0.46505	-0.155941	0.347624	-0.70703	0.177921	0.23604	0.221386	1.33198	2.47089	0.519802	0.42703	0.449109	0.681386	-0.0271287	0.630891	0.0814852	1.28188	4.11812		Paired t test
-0.792475	0.143663	0.685446	-0.0374257	-0.0173267	0.145347	0.029901	0.177426	0.215941	-0.331287	-0.0351485	0.121089	-0.116733	0.11802	-0.430297	-0.0619802	-0.0988119	0.179802	-0.397921	0.10297	0.289109	-0.836337	0.11297	0.204158	0.0320792	1.18188	2.69713	0.533366	0.363861	0.446931	0.870792	0.149307	0.570198	-0.136931	1.09317	4.09376		P value	0.2271
-0.624653	0.137228	0.55802	-0.196436	-0.0806931	0.358911	0.100891	0.0489109	0.276436	-0.289901	0.0823762	0.245743	0.0155446	0.184158	-0.627723	-0.313762	-0.16099	0.210792	-0.390792	0.080396	0.261881	-0.874158	0.0730693	0.0432673	0.121782	1.07396	2.64554	0.516931	0.536238	0.474059	0.989901	-0.0549505	0.150693	0.157129	1.40406	3.89822		P value summary	ns
-0.707822	-0.019802	0.611584	-0.0351485	-0.0822772	0.200198	0.0318812	0.0192079	0.60495	-0.278416	0.212673	0.155446	0.215446	0.353069	-0.634257	-0.185248	-0.224059	0.242673	-0.254554	-0.0275248	0.194059	-0.852277	-0.158713	0.324851	0.222772	1.10574	2.96733	0.341188	0.456139	0.193069	1.2105	0.0213861	-0.131485	-0.060396	1.46564	3.95416		Significantly different (P < 0.05)?	No
-0.509208	0.373069	0.664158	-0.0329703	-0.117525	0.279406	0.104653	0.0492079	0.46198	-0.207327	0.0517822	0.15297	0.162871	0.139505	-0.481089	-0.229208	-0.170594	0.14396	-0.246535	0.0420792	0.23901	-0.825941	-0.0371287	0.298911	0.0346535	1.18218	3.10564	0.352574	0.399802	0.382772	1.05149	0.228317	-0.0821782	-0.280396	1.5596	4.07921		One- or two-tailed P value?	Two-tailed
-0.66	0.277228	0.879802	-0.343663	0.00158416	0.0806931	0.00643564	-0.00990099	0.420495	-0.133663	0.243267	0.236238	-0.0484158	0.265941	-0.0585149	-0.263564	0.0757426	0.245149	-0.210396	0.113267	0.450594	-0.977228	-0.20297	0.247525	-0.0543564	1.04109	3.15327	0.26396	0.482475	0.562772	1.14455	0.186535	-0.292574	-0.0591089	1.56495	3.94396		t, df	t=1,208, df=39959
-0.743465	0.140099	0.844455	-0.224356	0.118812	-0.0473267	0.170099	0.142277	0.469307	-0.123465	0.0867327	0.22703	-0.168515	-0.100693	0.0343564	-0.167624	-0.144653	0.213564	-0.113861	0.0672277	0.359901	-0.909703	-0.0816832	0.288317	-0.0812871	1.15218	3.17337	0.158515	0.245446	0.447723	1.03079	0.382277	-0.19396	-0.497525	1.41277	3.91149		Number of pairs	39960
-0.857624	0.161485	0.873168	-0.191881	0.252871	-0.0544555	0.14099	-0.0070297	0.517228	-0.170792	0.248911	0.218713	-0.0558416	-0.00445545	0.279406	-0.140693	-0.147129	0.396733	-0.166139	0.0814852	0.522673	-1.04069	-0.0609901	0.209208	0.0687129	1.32455	3.28752	0.261188	0.438416	0.542673	1.37545	0.467129	0.00970297	-0.497525	1.5102	3.62713
-0.73396	0.0928713	1.00198	-0.03	0.224752	0.115644	0.0822772	-0.0376238	0.664554	0.00287129	0.122673	0.308812	0.0134653	0.00079208	0.27198	-0.176337	-0.0607921	0.400396	-0.18901	-0.0621782	0.453861	-0.791683	0.0224752	0.47495	0.07	1.34911	3.3698	0.183465	0.491386	0.426733	1.4105	0.296931	0.111485	-0.161584	1.60802	3.88624		How big is the difference?
-0.656535	0.0141584	0.963861	-0.157822	0.0972277	-0.0436634	0.115049	-0.00673267	0.492871	0.105545	0.0983168	0.198911	0.0252475	0.164158	-0.0244555	0.131782	-0.0948515	0.405248	-0.148812	0.139604	0.614752	-0.810792	-0.104356	0.274059	0.170693	1.46574	3.39644	0.415743	0.507129	0.461386	1.41762	0.503366	0.34198	-0.253465	1.7098	3.66376		Mean of differences (B - A)	0.002139
-0.530099	0.195842	1.03752	-0.217228	0.168416	0.0967327	0.145347	-0.0364356	0.596733	-0.0971287	0.104752	0.227228	-0.244257	0.070297	-0.211881	0.190198	-0.12802	0.44901	-0.290495	0.27198	0.39604	-0.58901	0.00920792	0.413861	0.101089	1.49426	3.39436	0.301188	0.390396	0.467921	1.32386	0.171683	0.38	-0.229901	1.75228	3.60317		SD of differences	0.354
-0.643663	0.277426	1.10307	-0.274752	0.0975247	-0.0913861	0.206832	0.0260396	0.612871	0.0152475	0.05	0.215545	0.0459406	0.176139	-0.221782	0.188317	-0.00336634	0.322079	-0.0711881	0.0715842	0.338218	-0.584455	0.0948515	0.378911	-0.0189109	1.48406	3.58465	0.347228	0.244356	0.594158	1.33307	0.409703	0.210891	-0.17802	1.88436	3.35505		SEM of differences	0.001771
-0.604653	0.268119	1.01772	-0.392871	0.00693069	0.0481188	0.299901	0.148218	0.289208	0.0285149	-0.162871	0.201683	0.0558416	0.210198	-0.576436	0.0680198	-0.0104951	0.205149	-0.12099	0.293267	0.399208	-0.548614	0.127426	0.405842	0.23396	1.51505	3.32861	0.181188	0.25802	0.602277	1.59604	0.30703	-0.0380198	-0.242277	1.64792	3.32604		95% confidence interval	-0,001332 to 0,005610
-0.525347	0.292277	0.984554	-0.239802	-0.114851	-0.0793069	0.122376	0.250099	0.524059	0.290297	-0.215743	-0.00346535	-0.183069	0.0539604	-0.510792	0.0234653	-0.0851485	0.418812	-0.0107921	0.271881	0.342277	-0.37901	-0.0365347	0.626733	0.0771287	1.50604	3.27574	0.256634	0.239109	0.52099	1.63752	0.195644	-0.398416	-0.18297	1.66149	3.32842		R squared (partial eta squared)	3.651e-05
-0.394257	0.405842	1.03168	-0.176139	0.0339604	0.13198	0.373663	0.00227723	0.53802	0.364257	-0.278911	-0.178317	-0.0525743	0.158317	-0.263861	-0.126535	-0.0253465	0.271881	-0.0981188	0.192079	0.505347	-0.297921	-0.00831683	0.500198	0.178119	1.54109	3.40663	0.390297	0.22297	0.49901	1.9296	0.314257	-0.294752	-0.0841584	1.48545	3.46248
-0.287426	0.401782	0.910594	-0.202772	0.00544554	0.213366	0.15495	0.0322772	0.612574	0.37604	-0.391782	-0.444752	-0.0720792	0.0613861	-0.0618812	0.0894059	-0.19	0.273069	-0.207921	0.392277	0.287822	-0.192772	-0.133267	0.507327	-0.0685149	1.38792	3.2897	0.404158	0.42198	0.624851	1.75505	0.453465	-0.281188	-0.184455	1.45881	3.27554		How effective was the pairing?
-0.658416	0.528416	1.20178	-0.140891	-0.0854455	0.234059	0.126535	0.0347525	0.597723	0.197129	-0.294356	-0.274257	0.156931	-0.0555445	0.0888119	-0.219109	-0.00584158	0.174356	-0.328911	0.404356	0.690594	-0.11099	-0.0163366	0.358713	-0.00386139	1.51634	3.46426	0.329307	0.245347	0.704752	1.71059	0.225743	-0.110396	0.196436	1.47436	3.31228		Correlation coefficient (r)	0.01049
-0.297921	0.306535	1.12267	-0.197822	-0.0523762	-0.113465	0.0565346	-0.0227723	0.520693	0.118515	-0.466634	-0.542475	-0.261287	0.0369307	-0.112079	0.020297	-0.108911	0.27495	-0.101881	0.34604	0.606535	0.00475248	-0.11	0.502079	-0.129604	1.67465	3.22099	0.28505	0.31802	0.807129	1.72604	0.523465	0.404752	0.0358416	1.5495	3.26149		P value (one tailed)	0.018
-0.477129	0.261584	0.944752	-0.133465	-0.0210891	0.0282178	0.185545	0.129307	0.531485	0.249901	-0.060396	-0.533465	-0.0113861	-0.0812871	0.255248	-0.102772	-0.200792	0.276535	-0.21505	0.357822	0.423069	0.114158	-0.0221782	0.386634	-0.100198	1.74614	3.1799	0.362079	0.464653	0.909802	1.48644	0.451683	0.476436	-0.213168	1.59436	3.15168		P value summary	*
-0.496931	0.291287	1.08584	-0.159406	-0.019604	0.179802	-0.0347525	0.0423762	0.471089	0.331584	-0.329604	-0.590693	-0.182673	0.0739604	0.112277	-0.0733663	0.0461386	0.246832	-0.205743	0.466733	0.488119	0.238515	-0.0256436	0.592376	-0.0570297	1.74851	3.2897	0.259109	0.421683	0.77495	1.75653	0.498119	0.738515	-0.123168	1.41772	3.2503		Was the pairing significantly effective?	Yes
-0.45604	0.42198	0.999802	-0.155644	0.168812	0.0484158	0.0968317	0.0426733	0.509802	0.0907921	-0.192871	-0.842574	-0.0214852	0.179901	0.00990099	-0.10396	-0.240396	0.247822	-0.138317	0.448812	0.404356	0.426634	-0.311485	0.581287	-0.0255445	1.85653	3.12356	0.114257	0.496238	0.87703	1.58634	0.423861	0.883663	-0.12099	1.65287	3.0396
-0.374257	0.571386	0.894356	-0.0815842	-0.112079	-0.059703	-0.0009901	0.0464356	0.487525	0.251287	-0.126931	-0.655743	-0.0421782	0.182673	-0.193663	-0.107327	0.0656436	0.181584	-0.0388119	0.487822	0.353069	0.579703	-0.12703	0.782673	-0.0240594	1.99238	3.23713	0.220297	0.454851	1.02465	1.73584	0.283366	0.618812	-0.116634	1.5699	2.9301
-0.242475	0.630792	0.906139	-0.206634	-0.0823762	-0.190495	0.0336634	-0.0116832	0.374356	0.362772	-0.277327	-0.751287	-0.00287129	0.246337	-0.486337	-0.332277	0.124455	-0.0246535	-0.089604	0.496535	0.417723	0.716139	-0.227624	0.746238	0.0665347	2.0095	3.26554	0.457624	0.0912871	0.942574	1.68683	0.272475	0.18901	-0.0428713	1.64723	2.91248
-0.353168	0.539307	0.69604	-0.202277	0.13198	0.14198	0.105545	-0.00980198	0.218713	0.270495	-0.269208	-1.13931	0.0773267	0.0579208	-0.499901	0.00247525	-0.129208	0.0362376	0.0759406	0.287327	0.39604	0.782574	-0.291683	0.672772	-0.0927723	2.17842	3.26743	0.32495	0.23396	0.991782	1.77851	0.322277	-0.019505	-0.172277	1.59614	2.83515
-0.434257	0.377426	0.797822	-0.138614	-0.0455446	-0.0548515	0.0371287	0.111089	0.311782	0.309505	-0.291683	-0.930792	0.089604	0.189703	-0.353861	-0.243663	-0.131683	0.157723	0.142475	0.445347	0.37198	0.797426	-0.134752	0.951485	-0.121287	2.0095	3.07842	0.493564	0.279703	0.896832	1.70168	0.400891	-0.318317	-0.263762	1.58475	2.81842
-0.273465	0.464356	0.558713	-0.135149	-0.0124753	-0.0334653	0.0377228	-0.00584158	0.194851	0.317228	-0.595545	-1.22228	0.160396	0.120594	0.00128713	-0.00742574	-0.508812	-0.0192079	0.0880198	0.394059	0.319406	0.948515	-0.136634	0.731782	0.01	2.33188	3.12851	0.511881	0.167624	0.831881	1.75743	0.45198	-0.438119	-0.114356	1.44465	2.64079
-0.32297	0.563465	0.656832	-0.130198	0.107525	-0.00237624	0.0386139	-0.166139	-0.0220792	0.573069	-0.429406	-1.32812	0.140891	-0.0563366	0.266139	0.0279208	-0.0450495	-0.0886139	0.303267	0.50396	0.385644	1.10109	-0.36	0.76802	-0.236832	2.32574	2.85139	0.410693	0.157426	0.787525	1.62396	0.570792	-0.360693	-0.11495	1.40545	2.50475
-0.215545	0.554059	0.547921	-0.0542574	-0.322178	0.136832	0.040099	0.0263366	0.111287	0.398614	-0.712574	-1.43584	-0.00613861	-0.0207921	0.472772	0.172079	-0.271782	-0.0895049	0.216634	0.515446	0.454059	1.09861	-0.333465	0.896733	-0.115644	2.34079	2.78644	0.236139	0.236634	0.753762	1.43089	0.462178	-0.232079	0.327525	1.35564	2.29455
-0.486931	0.556535	0.529703	-0.0193069	0.0172277	0.00811881	0.0119802	-0.0339604	-0.0749505	0.335941	-0.486634	-1.55624	0.0343564	-0.205545	0.307327	-0.23198	-0.187327	-0.0928713	0.191584	0.526238	0.40396	1.0699	-0.0859406	0.96604	0.0774257	2.45465	2.60178	0.344356	0.327921	0.974356	1.3403	0.486337	0.335347	0.331287	1.3195	2.08129
-0.35802	0.587426	0.412376	0.0478218	-0.171188	0.219802	-0.0471287	-0.0342574	0.205743	0.412673	-0.48198	-1.60723	0.145248	-0.070297	0.104059	0.0411881	-0.126238	-0.0940594	0.314356	0.346436	0.560198	1.03267	-0.251782	0.98	-0.0782178	2.66436	2.51168	0.331089	0.21802	0.78495	0.988416	0.728317	0.504356	0.186832	1.46426	1.71871
-0.338416	0.687426	0.521287	-0.105941	-0.0423762	0.0233663	0.115347	-0.0358416	-0.0730693	0.200396	-0.348614	-1.69069	0.157327	-0.0694059	-0.130198	-0.182772	-0.0133663	-0.157129	0.348317	0.388218	0.538812	1.10703	0.0241584	1.14663	-0.00514851	2.53139	2.08099	0.346238	0.368119	0.600891	0.96	0.441881	0.629901	0.089901	1.38871	1.44396
-0.268812	0.557822	0.500891	0.0587129	0.0173267	-0.0134653	0.147723	0.170792	0.0166337	0.138119	-0.375149	-1.80416	0.2	-0.0385149	-0.271881	-0.0364356	0.0370297	-0.0589109	0.202376	0.428119	0.617723	1.29475	-0.101386	1.32515	-0.0745545	2.5196	2.06337	0.392376	0.347327	0.665842	1.20248	0.403861	0.428515	0.341188	1.60376	1.25574
-0.319208	0.558119	0.381386	0.0624753	0.0176238	-0.0888119	-0.0107921	-0.113168	0.0494059	0.147129	-0.44396	-1.8299	0.212475	0.0248515	-0.318911	-0.162673	-0.059802	0.030099	-0.0473267	0.56703	0.627921	1.40525	-0.0751485	1.30584	-0.0730693	2.61059	1.91644	0.378119	0.406535	0.359505	1.39802	0.269208	0.0281188	0.313366	1.33851	1.03634
-0.119307	0.740297	0.173168	0.00584158	0.0186139	-0.245941	-0.0371287	-0.0465346	0.213663	0.155842	-0.090198	-1.9404	0.280792	-0.0341584	-0.484356	-0.0454455	-0.0660396	0.0282178	0.325743	0.635743	0.602079	1.47911	-0.268812	1.48941	0.179406	2.61099	1.91822	0.426139	0.35198	0.677624	1.40673	0.291485	-0.121287	0.346139	1.36327	0.883861
-0.112475	0.844356	0.253762	0.0665347	0.178317	-0.00188119	-0.00524752	0.00980198	0.128911	0.230792	-0.158614	-1.77386	0.0422772	-0.0635644	-0.601089	-0.139505	0.0174257	-0.133366	0.267624	0.394356	0.617822	1.55297	-0.229406	1.47416	0.0911881	2.54376	1.80248	0.294653	0.251188	0.463861	1.22604	0.287129	-0.169505	0.040198	1.1696	0.692376
0.0252475	0.721782	0.265248	0.0665347	0.107723	-0.107723	0.0272277	0.00851485	0.22505	0.387228	-0.116139	-1.86079	0.110891	-0.32297	-0.175049	-0.142871	0.171584	-0.136139	0.238911	0.370594	0.635446	1.4797	-0.17	1.78228	0.00485149	2.56604	1.66743	0.433168	0.209406	0.441584	1.19198	0.282178	-0.469604	0.456436	1.13782	0.629901
-0.12396	0.788218	0.116436	0.0675247	0.079604	-0.293267	0.160297	-0.0939604	0.322475	0.303465	0.0620792	-1.98832	0.0322772	-0.254257	-0.163564	-0.0150495	-0.0258416	-0.0682178	0.51802	0.557129	0.440297	1.61921	0.0456436	1.78228	0.00514851	2.56733	1.42228	0.331089	0.199208	0.538416	1.23158	0.307822	-0.336634	0.43297	0.973267	0.314554
0.0724753	0.794752	0.0982178	-0.0209901	-0.0382178	-0.298218	0.00217822	-0.0957426	0.239208	0.369604	-0.218812	-1.91495	0.07	-0.326139	0.380297	-0.0188119	0.10198	-0.070396	0.461386	0.474554	0.60703	1.52307	-0.029703	1.87099	-0.090198	2.6502	1.53149	0.249604	0.116238	0.547723	0.903366	0.454158	-0.0029703	0.587624	1.15198	0.186238
0.114257	1.02129	0.168812	0.00811881	0.0532673	-0.154752	0.164356	-0.0588119	0.245941	0.156931	-0.0908911	-2.10277	0.329901	-0.226436	0.366733	-0.0194059	0.0282178	-0.0428713	0.153564	0.569505	0.475842	1.57871	-0.0643564	2.05634	0.0109901	2.55267	1.30099	0.269406	0.294851	0.649802	1.09614	0.298812	0.439505	0.282574	0.957723	0.0731683
-0.0949505	0.838713	0.180891	0.258119	-0.136139	-0.251584	-0.144455	0.0308911	0.0945545	0.232772	-0.194554	-1.97059	0.119901	-0.388911	-0.050297	0.127228	0.183861	-0.147426	0.21297	0.39297	0.452871	1.85158	-0.0983168	2.0305	-0.17802	2.67673	1.22149	0.418911	0.314059	0.569703	1.14139	0.224752	0.672475	0.127228	0.985248	0.0319802
0.104356	0.815545	0.0729703	-0.0224752	-0.130594	-0.165049	-0.182871	0.0266337	0.263564	0.387723	0.0257426	-2.02693	0.218515	-0.388614	-0.344851	0.253861	0.0204951	-0.179208	0.43297	0.371881	0.411089	1.79198	0.119901	2.15703	-0.177426	2.60921	1.11248	0.305941	0.39297	0.641485	1.24475	0.441287	0.685149	0.202772	1.10465	0.060198
-0.00415842	0.884554	0.14604	0.127822	-0.12802	-0.0675247	0.00891089	-0.105545	0.0256436	0.275446	0.0254455	-2.08287	0.227129	-0.420099	-0.611584	0.0564356	-0.0448515	-0.274158	0.331386	0.377426	0.489307	1.97228	-0.131386	2.4798	-0.0149505	2.61446	0.977228	0.236436	0.472475	0.836337	1.0099	0.246634	0.638218	0.0780198	1.09436	-0.144059
0.164158	0.734752	-0.03	0.0691089	-0.183663	-0.141881	0.0406931	0.0235644	0.0983168	0.252574	-0.0666337	-2.17139	0.305545	-0.260099	-0.630396	-0.0776238	-0.050495	-0.217525	0.239802	0.22604	0.35505	1.91416	-0.0119802	2.39158	0.0447525	2.60881	0.753267	0.256238	0.34099	0.793069	1.05762	0.404851	0.432079	0.213861	0.971584	-0.0622772
-0.0134653	0.744653	0.201188	0.228416	-0.120495	-0.203762	-0.0180198	-0.136733	0.211089	0.439406	-0.167525	-2.0696	0.214158	-0.360396	-0.808317	-0.0456436	-0.0873267	-0.340891	0.268218	0.235644	0.433663	2.10574	-0.0425743	2.49337	-0.0149505	2.48198	0.868119	0.0848515	0.454158	0.780099	1.25594	0.29901	-0.113663	0.530396	1.15198	-0.24297
0.276733	1.12337	0.0248515	0.231188	-0.148614	-0.207129	-0.0456436	-0.0383168	-0.0927723	0.356238	-0.166238	-2.38059	0.323465	-0.197921	-0.666832	0.0385149	-0.284158	-0.383366	0.395743	0.434653	0.303366	2.09822	0.112772	2.84822	-0.0830693	2.57693	0.636931	0.0705941	0.284356	0.826238	1.27861	0.356535	-0.100099	0.378218	1.15139	-0.107129
0.0806931	0.91703	0.00940594	0.232079	-0.0432673	-0.180792	-0.103168	-0.170198	0.0204951	0.484851	-0.128119	-2.35158	-0.0156436	-0.226337	-0.503762	0.122574	0.0305941	-0.316535	0.354554	0.282376	0.281683	2.4504	-0.14	2.86366	0.0169307	2.51257	0.638218	-0.0320792	0.404455	0.845149	1.19842	0.516832	-0.14396	0.442574	1.24455	-0.040297
0.341485	0.869505	-0.00237624	0.101782	-0.0407921	-0.154851	0.0186139	-0.171089	-0.0358416	0.342574	0.0928713	-2.1901	0.272376	-0.505446	-0.329604	0.215446	-0.0409901	-0.510594	0.144257	0.143465	0.340792	2.29069	0.0756436	2.8401	0.107228	2.66822	0.38099	0.0436634	0.263663	0.856733	1.35129	0.357822	-0.0409901	0.58	1.08713	-0.216337
0.224455	0.692178	-0.146535	0.100792	0.438713	-0.00227723	-0.198317	-0.262079	-0.0828713	0.440594	0.0231683	-2.05772	0.160396	-0.476931	-0.0962376	0.137426	-0.0140594	-0.0417822	0.20297	0.183069	0.232475	2.38356	0.132574	3.07802	-0.0542574	2.76446	0.472871	-0.00148515	0.279505	0.849604	1.11485	0.481188	0.343861	0.08	0.668416	-0.0832673
0.143168	0.824554	-0.190396	0.229208	0.155545	-0.16901	-0.0658416	-0.11396	-0.130792	0.35802	0.155941	-2.02683	0.199109	-0.447525	0.0483168	-0.0462376	-0.138119	-0.0739604	0.230495	0.253267	0.195049	2.57574	0.159505	3.27723	-0.0127723	2.57188	0.375941	0.0742574	0.167426	0.874356	0.981188	0.484356	0.356832	0.334356	0.83	-0.0820792
0.213366	0.718218	-0.263663	0.0704951	0.232376	-0.102772	-0.0633663	-0.0445545	-0.147426	0.30703	0.188119	-1.98376	0.237426	-0.449109	-0.187723	0.197327	-0.0231683	-0.204653	0.138911	0.172574	0.247921	2.63782	0.228911	3.0796	-0.143366	2.51149	0.250891	0.0894059	0.0347525	1.17634	0.919109	0.485248	0.524851	0.534554	0.734059	-0.0823762
0.0139604	0.702178	-0.21604	0.229505	0.10703	-0.238317	-0.118119	-0.176436	-0.225644	0.186634	0.22	-1.83347	0.347624	-0.418119	-0.29604	0.534554	-0.0885149	-0.0775248	0.0367327	0.0530693	0.272079	2.66941	0.127723	3.43941	-0.0111881	2.67386	0.256139	0.137723	0.302772	1.22832	0.850396	0.358416	0.755941	0.380099	0.827822	-0.0467327
-0.00465347	0.839208	-0.199604	0.228515	0.20297	-0.24297	-0.213762	-0.178614	-0.0932673	0.223663	0.441485	-1.51347	0.193168	-0.29	-0.561188	0.312376	0.00524752	-0.238119	-0.0266337	-0.0649505	0.103366	2.70436	0.226436	3.45198	0.167822	2.55574	0.070198	0.124059	0.258515	1.25089	1.0704	0.168119	0.795842	0.107525	0.89099	0.0680198
-0.0228713	0.758416	-0.311287	0.225149	0.496931	-0.249703	-0.209109	-0.148911	-0.490297	0.231089	0.442376	-1.57376	0.262772	-0.332475	-0.766634	0.189901	0.0621782	-0.180297	0.0326733	-0.115941	0.284059	2.80089	0.15604	3.63584	0.138119	2.43663	0.155545	-0.0490099	0.36396	1.33495	1.24921	0.172772	0.397624	0.115545	0.923465	-0.0637624
0.239505	0.65604	-0.32297	0.0311881	0.249406	-0.0643564	0.0151485	-0.17802	-0.287921	0.178812	0.342673	-1.60347	0.210792	-0.394653	-1.06337	0.116238	-0.00217822	-0.213663	0.130792	-0.00455446	0.207228	2.83891	-0.0320792	3.81158	0.169406	2.31782	0.0386139	0.126832	0.249109	1.22901	1.0302	0.207723	0.229604	-0.0973267	0.733861	-0.105545
0.192574	0.764356	-0.425644	-0.0325743	0.149802	-0.133663	0.0186139	-0.115842	-0.142772	0.309703	0.469901	-1.60594	0.126337	-0.367723	-0.93099	0.0243564	-0.0425743	-0.116832	0.0320792	-0.121584	0.079505	2.85188	-0.0623762	3.95921	-0.0108911	2.4202	0.00207921	0.0738614	0.393267	1.28505	1.18396	0.40297	-0.232673	0.0719802	0.634554	-0.0189109
0.297129	0.686634	-0.287921	0.0839604	0.37198	-0.0792079	-0.0954455	-0.147327	-0.129109	0.290495	0.339505	-1.48	0.103762	-0.401089	-0.757327	0.0169307	-0.10505	-0.221782	0.131782	0.142079	0.0727723	2.70584	0.227624	4.01584	0.199505	2.42386	0.0680198	0.160495	0.277525	1.31198	1.19238	0.377624	-0.220297	-0.0156436	0.692475	-0.121287
0.222673	0.739208	-0.180891	0.209901	0.18505	-0.143861	-0.0338614	-0.0185148	-0.404257	0.400099	0.309208	-1.43059	0.141188	-0.552079	-0.334356	0.202574	0.0815842	-0.226733	0.0593069	-0.0923762	0.345644	2.50317	0.157921	3.94337	0.16703	2.08535	-0.0982178	-0.130396	0.33297	1.1204	1.06762	0.384752	-0.30703	0.0960396	0.56	-0.108614
0.234752	0.863762	-0.340495	-0.0141584	0.186634	0.0714851	-0.090396	-0.119109	-0.229703	0.188713	0.439208	-1.4299	-0.0689109	-0.374554	-0.602673	-0.0835644	-0.049604	-0.232376	0.0549505	0.0109901	0.241287	2.71079	0.00821782	4.22	0.0151485	2.37871	-0.0931683	0.00752475	0.406832	1.25079	1.22416	0.378812	0.0584158	0.111881	0.68	0.00217822
0.220594	0.727327	-0.321287	0.0714851	0.349406	-0.0975247	0.0638614	-0.050297	-0.186634	0.195545	0.468911	-1.22198	-0.0342574	-0.404554	-0.255644	-0.0579208	-0.0133663	-0.137921	0.0236634	-0.124851	0.207228	2.35069	-0.212673	4.33851	0.0132673	2.13327	-0.13099	0.115149	0.109802	1.24238	1.01446	0.514356	0.387327	0.158911	0.637822	-0.0486139
0.263564	0.872079	-0.214257	0.0664356	0.16099	-0.134059	-0.123069	-0.08	-0.142079	0.101089	0.379802	-1.42743	0.00247525	-0.155149	-0.333564	0.128713	-0.146139	-0.305049	0.0505941	-0.140396	0.259208	2.28238	0.318515	4.13673	-0.178614	1.98762	-0.258515	0.103663	0.0549505	0.968218	1.02248	0.362475	0.461188	0.0124753	0.577228	0.276337
0.216832	0.898713	-0.387822	0.0326733	0.162871	-0.0811881	-0.0787129	-0.15	-0.190297	0.0476238	0.379802	-1.43446	0.0659406	-0.246436	-0.632178	-0.0365347	-0.0586139	-0.191881	0.176634	-0.0361386	0.193861	2.14347	-0.243366	4.00713	-0.0889109	2.09158	-0.164158	0.030099	0.138911	1.12069	1.05267	0.45802	0.884455	0.0263366	0.565743	0.00089109
0.289802	1.08564	-0.400792	0.0886139	0.356931	-0.0583168	0.0775248	0.00910891	-0.147327	0.0228713	0.251089	-1.48485	-0.0473267	-0.187624	-0.710792	-0.173069	-0.0635644	-0.289307	0.145149	-0.0812871	0.246436	2.03574	-0.276733	3.84663	-0.0622772	2.09743	-0.323465	-0.0425743	0.244356	0.904752	0.871584	0.435842	0.460594	0.324554	0.655545	-0.0292079
0.274059	1.29594	-0.165545	0.114356	0.198812	-0.0667327	-0.109703	-0.0814852	-0.356238	-0.06	0.563267	-1.22594	-0.099901	-0.0606931	-0.725941	-0.179901	-0.125446	-0.206139	-0.0461386	-0.0348515	0.138119	2.15861	0.0623762	3.9398	0.0352475	2.01238	-0.232178	0.0356436	-0.212574	1.06911	1.06307	0.602376	0.13396	0.00118812	0.786535	-0.0313861
0.259802	1.10535	-0.40099	0.108416	0.270099	-0.00534653	-0.106337	-0.0811881	-0.276931	0.00712871	0.253861	-1.17693	0.115049	-0.280396	-0.742673	-0.277624	-0.0948515	-0.36604	0.0419802	-0.266832	0.193168	2.18426	0.150198	3.65139	-0.125347	2.12069	-0.330594	-0.0439604	-0.0729703	1.13277	1.23485	0.389802	0.0457426	0.209505	0.715644	0.0351485
0.285842	1.10356	-0.357921	0.233465	0.453762	-0.0518812	-0.133564	-0.0823762	-0.238614	-0.0161386	0.28198	-1.01208	0.122475	-0.0341584	-0.73	-0.0335644	-0.0292079	-0.285941	-0.0767327	-0.163168	0.0360396	1.91901	-0.00108911	3.65208	-0.0988119	2.03871	-0.400792	0.105248	-0.158713	1.0105	1.26515	0.4	-0.222772	0.446535	0.715941	0.099604
0.0482178	1.13178	-0.524653	0.168515	0.146535	0.00910891	-0.0290099	-0.0811881	-0.259406	0.109406	0.099802	-1.16594	0.0390099	-0.255347	-0.375743	-0.0391089	-0.103267	-0.413366	0.0842574	-0.148713	0.268317	1.94307	0.118911	3.52495	-0.132277	1.82554	-0.0925743	0.124752	-0.175347	1.13614	1.27446	0.439604	-0.210396	0.174158	0.51198	0.0611881
0.373267	1.22149	-0.51505	0.164158	0.338713	-0.0687129	-0.244059	-0.152079	-0.252277	0.115248	-0.16703	-1.22446	0.0158416	-0.0681188	-0.140594	-0.0715842	-0.29099	-0.174752	0.0133663	-0.22297	0.361584	2.16	0.277723	3.33713	-0.164455	1.87475	-0.0344554	-0.104851	-0.192376	0.730495	1.15594	0.60198	-0.0690099	0.414257	0.59802	0.150594
0.238416	1.31277	-0.631782	-0.189307	-0.350693	-0.167921	0.00990099	-0.12396	-0.249802	0.0629703	-0.102277	-1.3798	-0.106733	-0.391485	-0.154851	-0.104951	-0.0418812	-0.506535	-0.0451485	-0.396238	0.165446	2.02693	0.216139	3.38842	-0.00940594	1.94525	-0.0505941	0.134951	-0.298812	0.825743	1.19337	0.703465	-0.19	0.436436	0.532871	0.196337
0.253861	1.31396	-0.370594	-0.0329703	0.145941	0.0140594	-0.0858416	0.00663366	-0.124554	-0.179901	-0.210396	-1.31535	0.0591089	-0.26396	0.300594	0.0859406	-0.145545	-0.357723	0.0157426	-0.558218	0.380198	2.02515	0.114257	3.11089	-0.112574	1.86446	0.385149	0.0938614	-0.255842	1.07921	1.16267	0.652079	0.319307	0.40297	0.518218	-0.164752
0.136238	1.34455	-0.420396	-0.137327	-0.0728713	-0.0242574	-0.0118812	0.0360396	-0.312673	-0.111881	-0.189109	-1.47347	-0.185347	-0.0489109	0.00425743	-0.0190099	0.070396	-0.488911	-0.23297	-0.173069	0.433366	2.05238	0.306733	2.95584	-0.0828713	1.85584	0.308119	0.110891	-0.402178	0.865149	1.1405	0.691386	0.430099	0.618317	0.293663	0.101683
0.190099	1.30614	-0.472673	0.0207921	-0.00356436	-0.0606931	0.110594	-0.0239604	0.039802	-0.352574	-0.346535	-1.61436	0.069901	-0.0834653	-0.0408911	-0.335446	-0.0548515	-0.573168	-0.131188	-0.185743	0.358713	2.17109	0.17604	2.88871	-0.0844555	1.64693	0.539208	-0.0308911	-0.201386	0.960495	1.23455	0.607525	0.721287	0.762772	0.41	0.13198
0.234356	1.19119	-0.342475	-0.0438614	0.145842	-0.040297	0.0558416	-0.184554	-0.0577228	-0.375743	-0.294554	-1.71366	0.105842	-0.090198	-0.280396	-0.0334653	0.193861	-0.455842	-0.199703	-0.050297	0.234356	2.16901	-0.00089109	2.60366	-0.0153465	1.59673	0.554059	-0.0129703	-0.290792	1.05455	1.23743	0.619604	0.38297	0.885644	0.492871	-0.049604
0.0582178	1.25436	-0.273168	-0.0463366	0.175248	-0.0192079	0.0607921	-0.214554	0.0175247	-0.29901	-0.242277	-1.62822	0.0517822	0.0545545	-0.798119	-0.345941	0.312277	-0.528119	-0.351881	-0.215743	0.412277	2.04208	0.25099	2.50812	-0.309703	1.76594	0.567723	0.123366	-0.277525	0.958911	1.10931	0.441089	0.275446	0.563762	0.427921	0.134752
-0.0169307	1.12842	-0.516634	-0.0785148	0.205842	-0.129505	0.0029703	-0.126436	0.0211881	-0.173168	-0.31099	-1.85594	-0.0354455	0.0190099	-0.905743	-0.0090099	0.090396	-0.448911	-0.134356	0.0819802	0.289505	1.85426	-0.0349505	2.26495	-0.313762	1.71644	0.569505	0.0221782	-0.167228	1.02238	1.32307	0.640099	-0.125248	0.469406	0.510495	0.0444555
-0.00118812	1.03426	-0.291089	-0.0515842	0.115842	-0.07	0.124158	-0.187624	0.14802	-0.330099	-0.225644	-1.90644	0.118614	0.0706931	-0.99396	-0.233069	0.367624	-0.461584	-0.381287	-0.0566337	0.316733	1.88861	-0.0627723	2.23089	-0.0931683	1.57762	0.451287	0.159505	-0.186436	1.12861	1.13406	0.490594	-0.423861	0.366337	0.431485	0.0629703
0.175248	0.980792	-0.372673	-0.113762	0.0574257	-0.177426	0.216634	-0.0276238	-0.0660396	-0.194851	-0.321287	-2.01683	0.121386	0.195842	-0.415347	-0.138614	0.0269307	-0.474257	-0.290693	-0.0707921	0.316436	1.79198	0.070099	1.98901	-0.244455	1.49535	0.522376	0.245347	-0.0859406	1.25109	1.16446	0.499604	-0.720891	0.521386	0.570099	0.146832
0.00445545	0.889208	-0.528614	-0.0246535	0.239901	-0.0589109	0.220891	-0.127327	-0.059901	-0.216535	-0.266832	-1.93792	0.0650495	0.127129	-0.183663	-0.395446	-0.101782	-0.367624	-0.0695049	0.00534653	0.243267	2.04723	0.0725743	1.80802	-0.347822	1.47485	0.620495	0.0132673	-0.235347	1.15673	1.09287	0.349208	-0.398812	0.268911	0.37	-0.0793069
-0.00732673	0.838812	-0.522079	-0.0877228	-0.0706931	-0.131881	0.323366	-0.128911	-0.0821782	-0.269109	-0.3	-2.02277	-0.120891	0.0172277	0.206238	-0.342574	-0.134257	-0.441188	-0.156733	-0.0948515	0.26901	1.89307	0.108812	1.61703	-0.282376	1.49069	0.595149	0.00089109	-0.00475248	1.25079	1.15257	0.887921	-0.226139	0.508614	0.446436	-0.00069307
-0.0766337	1.02901	-0.545545	-0.22198	-0.0428713	-0.0242574	0.32703	-0.090495	0.0543564	-0.20198	-0.247723	-2.02188	-0.178119	0.140099	0.468911	-0.0690099	-0.164554	-0.453861	-0.19297	-0.0150495	0.296238	1.61614	-0.104158	1.59644	-0.109208	1.52931	0.532277	-0.0830693	-0.147327	1.25673	0.866139	0.717525	0.257822	0.538614	0.375644	-0.185149
-0.0553465	0.82297	-0.598713	-0.225644	-0.0050495	-0.0938614	0.232574	-0.090495	0.120891	-0.256139	-0.403267	-1.61287	0.137426	-0.148911	0.320594	-0.104257	0.0554455	-0.335248	-0.441683	0.194356	0.38198	1.37079	0.0329703	1.53733	-0.144752	1.32604	0.59604	-0.0389109	-0.23802	1.1005	0.854653	0.934653	0.419901	0.474257	0.603267	0.0181188
-0.00653465	0.645644	-0.663762	-0.227525	0.111782	0.0750495	0.145743	9.901e-05	-0.00326733	-0.191188	-0.220099	-1.35663	-0.0806931	-0.0388119	0.0786139	-0.389901	0.243564	-0.416436	-0.278911	-0.00643564	0.406337	1.05792	0.412277	1.47703	-0.0818812	1.11188	0.687921	0.0772277	-0.0371287	1.16455	0.851881	1.04149	0.24198	0.470495	0.279703	0.0177228
-0.0461386	0.808416	-0.748713	-0.202475	0.109307	-0.14396	0.148812	-0.162376	0.10505	-0.183465	-0.0738614	-1.35535	0.0535644	0.167228	0.0866337	-0.113564	0.079505	-0.488218	-0.364554	0.0415842	0.150495	0.906634	0.113069	1.16822	-0.0877228	1.33891	0.649208	0.0907921	-0.276634	1.19861	0.999703	0.790495	0.442475	0.337723	0.319505	0.0536634
0.00425743	0.702376	-0.242178	-0.266535	0.0436634	-0.0935644	-0.0668317	-0.0336634	0.139109	-0.366337	-0.269109	-1.27842	0.116634	0.123861	-0.245347	-0.117327	0.0451485	-0.469604	-0.332079	0.149307	0.396733	0.856238	-0.0989109	1.05287	-0.0341584	1.25327	0.49802	0.00475248	-0.264554	1.23475	1.02485	0.677921	0.366436	0.525545	0.366238	-0.106337
-0.0049505	0.86505	-0.208119	-0.080297	-0.311584	-0.193861	0.0974257	-0.134257	0.204653	-0.228911	-0.0562376	-1.25762	0.120693	0.201782	-0.236337	-0.0929703	0.0719802	-0.292574	-0.299307	0.105446	0.240297	0.767426	0.129406	1.00713	-0.169406	1.13723	0.425644	-0.0415842	-0.00306931	1.27158	1.1397	0.469109	-0.0614852	0.714059	0.381188	-0.107525
-0.166139	0.877426	-0.171287	-0.113663	-0.125644	-0.174356	0.130792	-0.0649505	0.153366	-0.101881	-0.283069	-1.15267	0.00069307	0.0366337	-0.378317	-0.0391089	0.00821782	-0.335545	-0.236238	0.122475	0.22505	0.280792	0.137129	0.892673	-0.105842	1.0797	0.513267	-0.00049505	-0.30198	0.864158	1.19416	0.690297	-0.210594	0.708416	0.485743	-0.18396
-0.142673	0.954752	-0.169109	-0.186436	-0.100891	-0.0642574	0.16297	-0.0955446	0.216733	-0.00574257	-0.219604	-1.08614	0.00346535	0.115842	-0.090297	-0.223762	0.344158	-0.410099	-0.351584	0.111683	0.157723	0.0334653	0.147624	0.81099	0.0070297	0.991584	0.687426	0.0421782	-0.454851	0.868218	1.08861	0.672376	-0.380099	0.712475	0.401584	-0.162277
-0.121287	0.782079	0.0846535	-0.118614	-0.0342574	-0.0435644	0.136139	0.0231683	0.102376	0.162871	-0.25703	-1.05426	0.00188119	-0.0862376	0.0789109	-0.139109	0.16198	-0.395248	-0.287921	0.0387129	0.21	-0.0409901	0.245644	0.597129	-0.189406	1.09347	0.520693	-0.0688119	-0.446139	0.964158	1.0196	0.843861	-0.219505	0.718317	0.358713	-0.244356
0.0909901	0.859802	-0.123465	-0.223861	0.0845545	-0.0528713	0.080099	-0.00990099	0.19604	0.109109	-0.228812	-0.96297	-0.186634	-0.250495	0.309109	-0.0512871	0.060396	-0.319505	-0.256634	-0.0742574	0.262376	-0.186139	0.326535	0.483267	-0.124653	0.914653	0.568911	-0.0279208	-0.249307	0.971584	1.00475	0.722871	-0.0152475	0.47297	0.301485	-0.0682178
-0.00920792	0.907129	0.0252475	-0.288812	-0.103861	-0.150891	0.141584	0.0161386	0.228812	0.0574257	-0.302871	-0.947822	-0.12297	-0.233168	0.536238	-0.174158	-0.00217822	-0.140297	-0.504158	0.0437624	0.104356	-0.268515	0.206436	0.53099	-0.261188	0.916535	0.457129	-0.0780198	-0.300297	0.818416	0.777624	0.734257	0.188317	0.75703	0.120396	0.0364356
-0.0209901	0.954455	0.0830693	-0.231881	-0.19703	-0.131782	0.0840594	0.0726733	0.322178	-0.184554	-0.0875247	-1.11465	-0.030495	-0.249901	0.445248	0.00970297	0.275347	-0.281386	-0.250099	0.214455	0.333267	-0.338713	0.307228	0.199307	-0.266733	0.794951	0.414158	0.0228713	-0.14297	0.825545	0.888911	0.80198	0.568812	0.671386	0.101287	-0.0784158
-0.0711881	1.03188	0.148812	-0.267426	0.0817822	-0.300693	-0.0734653	0.199604	0.395941	-0.218317	-0.0221782	-1.09663	-0.206832	-0.0141584	0.180792	-0.0630693	0.182772	-0.0725743	-0.309109	-0.0163366	0.232475	-0.328911	0.358713	0.18703	-0.144752	0.982673	0.54802	0.123366	-0.226436	0.575149	0.718119	0.839703	0.73901	0.681386	0.330594	-0.00663366
-0.173564	1.03931	0.202673	-0.300495	0.0826733	-0.180891	0.0284158	0.256139	0.429406	-0.244356	-0.127723	-1.02149	-0.144653	0.060099	-0.381782	-0.404356	0.399307	-0.27396	-0.217327	0.0591089	0.192871	-0.428416	0.458614	0.105644	-0.0339604	0.979802	0.341683	0.104554	-0.186832	0.743267	0.73604	0.817426	0.720792	0.870693	0.238614	-0.0263366
-0.0974257	1.1598	0.0080198	-0.305149	-0.198911	-0.280495	0.089604	0.313663	0.183465	-0.267624	-0.00168317	-1.00317	-0.244356	-0.103168	-0.0555445	0.0334653	0.116535	-0.184158	-0.0861386	0.114257	0.301089	-0.628614	0.412277	0.0257426	-0.128911	0.795743	0.412871	0.183861	-0.209109	0.81198	0.594356	0.54297	0.350099	0.875644	0.275446	0.0429703
0.019604	1.1399	-0.0282178	-0.339109	-0.10604	-0.229505	-0.0989109	0.310891	0.123465	-0.261782	-0.107228	-1.20861	0.0768317	0.121584	-0.455644	-0.189307	0.206535	-0.256832	-0.215248	0.280297	-0.019703	-0.766634	0.265545	-0.184653	-0.204455	0.858317	0.484257	-0.0678218	0.0813861	0.752574	0.483267	0.609109	0.108119	0.660297	0.343267	0.10703
-0.0220792	1.0604	0.0549505	-0.226535	-0.0769307	-0.238119	0.124158	0.308713	0.0962376	-0.00465347	-0.113762	-0.985644	-0.112871	0.0164356	-0.29099	-0.195545	0.145347	-0.239208	-0.269307	0.426436	0.0894059	-0.681584	0.114455	-0.132574	-0.169703	0.730198	0.334554	-0.0179208	-0.189406	0.85396	0.811584	0.45495	-0.410396	0.694951	0.220198	0.0689109
-0.0050495	0.992673	0.0482178	-0.13297	0.0233663	-0.187327	0.127228	0.217723	0.189109	-0.0579208	-0.0181188	-0.842673	-0.203168	0.00089109	-0.342673	-0.109604	0.0140594	-0.00118812	-0.148416	0.595347	0.105545	-0.818416	0.313366	-0.079604	-0.14802	0.973069	0.463267	0.0506931	-0.019505	0.806337	0.859505	0.526733	-0.339208	0.730297	0.254257	0.0693069
-0.296832	0.984257	0.0722772	-0.299802	-0.294752	-0.224752	0.0679208	0.125545	0.0643564	0.00851485	0.126238	-0.812772	-0.205545	0.146337	0.223762	-0.116436	0.0430693	-0.0851485	-0.177129	0.364851	0.403861	-1.11426	0.426436	-0.127525	-0.0358416	0.902178	0.441089	0.0621782	-0.140594	0.807426	0.746238	0.564158	-0.388317	0.766832	0.317426	0.00693069
0.101089	0.938416	-0.0217822	-0.423762	-0.254158	-0.203069	0.161683	0.0849505	0.167426	-0.0440594	-0.00118812	-0.953465	-0.147624	-0.0294059	0.0808911	-0.050495	-0.237525	-0.0594059	-0.235347	0.511881	0.174059	-0.842574	0.438218	-0.0483168	-0.232673	0.800099	0.258515	0.01	0.118416	0.726436	0.601782	0.63099	-0.319406	0.833366	0.261188	0.211683
-0.453762	1.05327	0.0626733	-0.119901	-0.223267	-0.0492079	0.00237624	0.272772	0.173267	-0.129406	0.145149	-1.01505	-0.180099	-0.102178	0.11495	-0.156931	-0.0191089	-0.112079	-0.293267	0.620099	0.0713861	-1.06782	0.348515	-0.284356	-0.14099	0.830198	0.324059	0.0162376	-0.060099	0.606139	0.397921	0.736832	0.220792	0.839901	0.445248	0.205842
-0.247327	1.04832	0.0565346	-0.256733	-0.158911	-0.0566337	0.134554	0.0827723	-0.0130693	-0.0944554	0.079901	-1.19663	-0.252871	0.0760396	0.281089	-0.134951	0.00940594	-0.124752	0.019802	0.696832	0.207129	-0.736139	0.387822	-0.0522772	-0.029901	0.844951	0.196535	-0.0451485	-0.0226733	0.836634	0.253762	0.642772	0.361584	0.87802	0.198614	0.229109
-0.293168	1.28584	0.0215842	-0.293861	-0.497129	-0.316535	0.167327	0.301584	0.0811881	-0.220495	-0.0175247	-1.69228	-0.184752	-0.0641584	0.00693069	-0.140792	-0.0221782	-0.13901	-0.00811881	0.532673	0.195049	-1.06416	0.179307	-0.193366	-0.069802	0.92703	0.359307	0.153168	-0.0162376	0.713168	0.490198	0.588614	0.619604	0.883564	0.262079	0.0293069
-0.307129	1.15436	0.0450495	-0.33099	-0.287129	-0.323663	0.106436	0.239109	-0.135149	-0.216535	0.00326733	-1.75941	-0.185743	-0.0465346	-0.0469307	0.173366	0.107426	0.00920792	-0.0331683	0.610297	0.149307	-1.16376	0.347723	-0.524455	-0.169109	0.789703	0.261782	0	-0.157525	0.468713	0.478713	0.46505	0.471683	0.978812	0.23396	-0.0251485
-0.322079	1.15535	0.0388119	-0.276238	-0.374059	-0.211683	0.109802	0.208218	-0.192673	-0.242178	0.110891	-2.16089	-0.287921	-0.180495	-0.169208	-0.0847525	0.10703	-0.0340594	0.0327723	0.567921	0.35604	-1.30554	0.224851	-0.317129	-0.0868317	0.771386	0.380594	0.0746535	-0.118218	0.342079	0.45297	0.371188	0.328218	0.736238	0.295149	0.176634
-0.55604	1.24871	0.194455	-0.241584	-0.312871	-0.249109	0.230099	0.0170297	-0.160594	-0.177228	0.1	-2.25901	-0.192475	-0.102475	-0.470198	0.0574257	0.163861	-0.0158416	0.0339604	0.455248	0.0523762	-1.16723	0.207228	-0.340396	-0.0629703	0.821881	0.470594	0.170891	-0.423267	0.407426	0.557525	0.599901	-0.137129	0.990891	0.288911	0.0571287
-0.41099	1.27871	-0.00237624	-0.437822	-0.181287	-0.256832	0.0491089	0.116733	-0.188416	-0.173564	-0.00425743	-2.25802	-0.0734653	-0.235149	-0.430297	-0.0415842	0.105347	-0.0891089	0.25604	0.413168	-0.112178	-1.08832	0.408317	-0.237426	-0.129505	0.712376	0.406535	0.276436	-0.205149	0.282772	0.382079	0.356733	-0.350099	0.679307	0.450495	0.287921
-0.586436	1.23842	-0.039802	-0.252772	-0.55604	-0.145842	0.109109	0.175545	-0.0537624	-0.290495	0.142079	-2.44703	-0.294455	-0.376535	-0.449802	-0.0784158	0.00257426	-0.130594	0.127327	0.622574	0.079901	-0.89198	0.357921	-0.195347	-0.137228	0.750099	0.301584	0.123861	-0.259901	0.257426	0.557822	0.301782	-0.56396	0.852673	0.15901	0.136634
-0.414356	1.33059	-0.198416	-0.447723	-0.145743	-0.302574	0.080099	0.0146535	-0.15099	-0.138416	0.0276238	-2.7998	-0.226337	-0.201089	-0.146832	0.0060396	-0.116535	0.0455446	0.0689109	0.36198	0.225941	-0.714951	0.369406	-0.225347	-0.264356	0.636535	0.208218	0.191287	-0.0921782	0.233366	0.382079	0.207129	-0.456535	0.801287	0.215644	0.113168
-0.708911	1.24218	0.0029703	-0.260495	-0.734158	-0.090297	0.110693	0.171881	-0.0463366	-0.164752	-0.080396	-3.08475	-0.356634	-0.343069	0.0145545	0.189802	-0.188614	-0.287426	0.261089	0.472079	-0.108614	-0.765149	0.384851	-0.218812	-0.122079	0.711188	0.324851	0.167525	0.0039604	0.0446535	0.235049	0.183663	-0.55	1.15584	0.18505	-0.0130693
-0.385842	1.36564	-0.00415842	-0.178911	-0.337228	-0.16802	0.141287	0.110891	0.0780198	-0.160396	-0.190495	-3.1297	-0.330396	-0.357921	0.124059	-0.226733	-0.0854455	-0.0219802	0.325446	0.428119	-0.0262376	-0.685049	0.428515	-0.31297	-0.277327	0.78604	0.322079	0.174951	-0.0228713	0.00584158	0.337129	0.308911	-0.162871	0.760396	0.241089	-0.290594
-0.402475	1.24059	0.0605941	-0.317525	-0.366931	-0.295149	0.0815842	-0.0491089	0.0873267	-0.159208	-0.281881	-3.44218	-0.230693	-0.27	0.16703	0.019604	0.10703	-0.186535	0.208218	0.372673	-0.111089	-0.286733	0.280594	-0.260099	-0.0738614	0.61	0.221485	0.150297	0.0790099	0.228614	0.250099	0.38297	0.437327	0.552772	0.0773267	-0.0730693
-0.362277	1.20653	-0.0740594	-0.226238	-0.279109	-0.272871	-0.167426	0.111485	0.0640594	-0.126733	-0.303861	-3.45337	-0.424455	-0.380792	0.0853465	-0.0481188	0.109505	0.0171287	0.298218	0.461881	-0.0668317	-0.119307	0.234851	-0.0994059	-0.259505	0.461881	0.21901	0.0568317	0.0114851	0.319901	-0.0472277	0.377921	0.353564	0.978911	0.191188	-0.0748515
-0.310792	1.15149	0.110099	-0.291782	-0.339703	-0.221782	-0.0452475	0.110891	0.104951	-0.0867327	-0.288317	-3.57436	-0.236931	-0.203762	-0.43198	-0.0568317	0.171089	-0.18901	0.268218	0.452277	0.0183168	-0.101287	0.378119	-0.141485	-0.0157426	0.55	0.339901	0.130594	0.115545	0.323366	0.0270297	0.413465	0.511683	0.866535	0.273762	-0.235149
-0.45901	1.08772	-0.0211881	-0.117921	-0.209406	-0.199505	-0.0124753	-0.0209901	0.0554455	-0.0283168	-0.314653	-3.73505	-0.368218	-0.0564356	-0.420198	-0.0336634	-0.0129703	-0.175049	0.206931	0.562376	0.030099	-0.121782	0.390198	-0.216139	-0.271881	0.647426	0.398713	0.105842	-0.0116832	0.35802	0.189505	0.165941	0.148119	0.91604	0.457228	-0.0188119
-0.479802	1.31396	-0.111485	-0.183168	-0.148812	-0.266634	0.119703	-0.0225743	-0.210891	-0.0583168	-0.499406	-3.98535	-0.211287	-0.0685149	-0.661881	-0.0429703	0.124158	-0.191089	0.264752	0.553465	-0.146634	-0.104752	0.215743	-0.292673	-0.131188	0.654851	0.367228	0.0416832	0.0232673	0.418614	0.260396	0.0511881	-0.12505	0.991485	0.409604	-0.241584
-0.472673	1.33861	-0.0527723	-0.06	-0.0579208	0.0743564	0.0218812	-0.0535644	-0.256931	-0.129604	-0.276931	-4.08495	-0.214653	-0.153069	-0.524158	-0.269802	-0.341188	-0.0153465	0.0447525	0.387624	-0.103663	-0.309307	0.288713	-0.182871	-0.139901	0.531386	0.265347	-0.0142574	0.0982178	0.191386	0.0514852	-0.0716832	-0.0586139	0.87604	0.372574	-0.27495
-0.494653	1.12198	-0.0530693	-0.0365347	-0.0854455	-0.0939604	0.0240594	0.0633663	-0.0923762	-0.0624753	-0.61297	-4.27149	-0.285941	-0.0339604	-0.426139	0.132376	-0.050396	9.901e-05	0.102277	0.247426	-0.0294059	-0.201683	0.301386	-0.136436	-0.117624	0.436436	0.130693	0.150396	0.0622772	0.135743	-0.100198	0.119802	-0.433366	0.709307	0.453663	-0.439901
-0.484158	1.15485	-0.113663	-0.0136634	-0.203564	-0.104158	0.249604	0.0630693	-0.139109	0.0563366	-0.770198	-4.0496	-0.315941	-0.385347	-0.163168	0.0365347	-0.114851	-0.0144554	0.204455	0.269109	-0.197921	-0.317426	0.162871	-0.151881	-0.0850495	0.500198	0.21604	-0.0936634	0.138119	0.169802	0.0660396	0.0219802	-0.520594	0.724554	0.447129	-0.323564
-0.505248	1.14733	-0.176139	0.040495	-0.139604	-0.0812871	0.0351485	0.00148515	-0.127723	-0.0376238	-0.736535	-4.17554	-0.348416	-0.365248	0.112574	-0.102475	-0.14	-0.0587129	0.266634	0.513267	-0.0649505	-0.139505	0.294653	-0.150396	-0.0943564	0.430495	0.240495	-0.0607921	0.111188	0.103564	-0.0874257	0.113465	-0.574059	0.72604	0.187822	-0.300297
-0.528812	1.0905	-0.145545	0.00435644	-0.229901	0.010099	-0.110198	0.00079208	-0.0572277	0.0478218	-0.915049	-4.32931	-0.253069	-0.535446	0.378713	-0.049901	0.0233663	0.0164356	0.179505	0.385248	-0.171089	-0.133762	0.339802	-0.142079	-0.232673	0.460297	0.266238	-0.0873267	0.269505	0.135446	-0.429703	0.277426	-0.418812	0.48901	0.459208	-0.397327
-0.421386	0.997327	-0.116832	0.127228	-0.079901	-0.0970297	0.14604	-9.901e-05	-0.194851	0.29505	-0.661386	-4.14287	-0.226139	-0.604653	0.235743	-0.275545	-0.164455	0.163465	0.24198	0.378119	0.0515842	-0.0888119	0.230297	-0.176139	-0.208911	0.54099	0.170396	-0.115149	0.182376	-0.142376	-0.424653	-0.039703	0.15901	0.635644	0.319406	-0.28604
-0.472772	0.903564	0.0719802	-0.040198	-0.108614	0.117426	-0.198119	-0.0625743	0.0275248	0.261683	-0.880495	-4.19079	-0.0774257	-0.397921	0.165545	-0.0610891	0.060198	0.090495	0.330099	0.524455	-0.146139	0.202376	0.55703	-0.141188	-0.333564	0.566733	0.0636634	-0.0236634	0.244851	0.107327	-0.357822	0.28495	0.47703	0.737426	0.213861	-0.353465
-0.404752	1.06733	-0.0908911	-0.0176238	-0.136436	-0.00910891	-0.253168	0.0265346	-0.0519802	0.13802	-0.90703	-4.24376	-0.261485	-0.321881	0.060099	0.029604	0.0376238	0.136832	0.138515	0.457723	-0.0128713	0.373267	0.445941	-0.0184158	0.00217822	0.460594	0.236535	-0.270792	0.162277	0.0970297	-0.382871	-0.00039604	0.319802	0.339802	0.29	-0.300297
-0.45703	0.942277	-0.0377228	0.0642574	-0.194554	0.0128713	0.00148515	-0.0050495	0.119208	0.0965346	-0.960297	-4.12515	-0.363663	-0.142376	-0.491386	0.0540594	0.0415842	-0.00831683	0.205446	0.35	0.0263366	0.56099	0.400792	-0.150891	-0.0930693	0.665347	0.259406	-0.26703	0.346634	0.259505	-0.478218	0.00267327	0.324158	0.545248	0.0576238	-0.406535
-0.478119	1.15604	0.030396	0.0968317	-0.103267	-0.0964356	-0.0251485	-0.156931	0.190693	0.190396	-0.985149	-4.36287	-0.0855445	-0.432574	-0.622871	-0.0814852	-0.144356	0.0777228	0.202376	0.214455	-0.242574	0.507525	0.443168	0.00574257	-0.197327	0.318515	0.219307	-0.266733	0.320297	0.294158	-0.545347	-0.0860396	0.0494059	0.491089	0.295545	-0.506139
-0.620099	1.25446	-0.0430693	-0.0090099	-0.135743	0.0246535	0.109208	-0.00821782	0.14396	0.126139	-0.757426	-4.45436	-0.268911	-0.222772	-0.574653	0.0732673	0.10901	0.125644	0.0423762	0.457624	-0.0429703	0.752178	0.309901	0.0505941	-0.0728713	0.488614	0.358218	-0.295446	-0.0141584	-0.0205941	-0.290099	-0.303861	-0.137228	0.539109	0.0931683	-0.585743
-0.334257	1.16158	0.0253465	0.0438614	-0.22604	0.0772277	-0.137129	-0.128515	0.157327	0.270594	-0.78099	-4.49059	-0.183465	-0.36198	-0.588218	-0.211782	0.0861386	-0.0173267	0.129307	0.552376	-0.00405941	0.912871	0.355743	0.133564	-0.107723	0.40901	0.288713	-0.173861	0.108614	0.132871	-0.254455	-0.150792	-0.52802	0.437921	0.482079	-0.528119
-0.448713	1.16842	0.145941	-0.0226733	-0.136733	-0.0193069	-0.172178	-0.0394059	0.259703	0.235941	-0.644752	-4.42099	-0.156238	-0.284059	-0.318416	-0.288614	0.0960396	0.188515	0.255049	0.385941	-0.154455	0.839109	0.492475	0.00405941	-0.112376	0.456634	0.308812	-0.26297	0.0180198	0.237822	-0.411386	-0.369604	-0.550594	0.386139	0.307822	-0.70297
-0.512277	1.17307	-0.134059	-0.119802	0.146436	0.154158	-0.0675247	-0.0991089	0.521485	0.294059	-0.668812	-3.93634	-0.249307	-0.415842	-0.108317	-0.164554	-0.117723	0.147426	0.224158	0.410099	-0.143663	1.05663	0.329208	0.141683	-0.0873267	0.283366	0.417723	-0.322277	-0.0735644	0.143465	-0.128515	-0.146436	-0.230099	0.22099	0.352079	-0.685049
-0.433267	1.24089	-0.0446535	-0.0379208	0.119208	0.176733	-0.0928713	-0.161287	0.383564	0.169802	-0.69198	-4.11832	-0.25396	-0.487525	0.129307	-0.449208	-0.049703	0.0762376	0.191683	0.301485	-0.162871	0.981089	0.407822	0.156238	-0.153465	0.386733	0.114752	-0.421287	0.0470297	0.33099	-0.505446	0.0435644	-0.131782	0.264257	0.21505	-0.416436
-0.394554	1.36901	0.0265346	0.0540594	-0.00079208	0.0793069	-0.0888119	-0.102178	0.546238	0.00524752	-0.435545	-4.06574	-0.19703	-0.440198	0.147228	-0.264455	0.0886139	0.0669307	0.116139	0.615347	-0.0544555	1.10554	0.233564	-0.020099	-0.260594	0.238515	0.161485	-0.139703	0.0467327	0.337822	-0.44604	0.0029703	0.285644	0.43099	0.127426	-0.588119
-0.417723	1.36871	0.146535	-0.143366	-0.00108911	0.101881	0.00524752	-0.164356	0.777921	-0.06	-0.589406	-3.92505	-0.0704951	-0.363465	-0.17396	0.160891	0.289406	0.36703	0.183366	0.231683	-0.115545	0.969406	0.411782	0.199802	-0.295545	0.429703	0.207921	-0.288416	0.208911	0.243762	-0.41297	-0.438911	0.412772	0.418713	0.138911	-0.542376
-0.439109	1.18842	-0.00158416	-0.0314852	0.123564	0.224158	-0.11198	-0.104653	0.511287	-0.0368317	-0.422871	-4.25248	-0.14604	-0.15396	0.0330693	0.0934654	0.019604	0.137129	0.24	0.472079	-0.166238	1.17228	0.33099	0.149208	-0.300099	0.380891	0.353366	-0.256634	0.358614	0.217129	-0.323564	-0.309802	0.489604	0.525149	0.373465	-0.838119
-0.33198	1.31832	0.06	-0.100495	0.186931	0.116139	-0.0482178	0.0469307	0.33396	-0.102772	-0.505149	-3.91802	-0.121287	-0.28604	-0.290891	-0.326733	0.122277	0.18505	0.458713	0.61495	-0.318812	0.886139	0.349901	0.362673	-0.0228713	0.382376	0.396337	-0.0651485	0.049901	0.281881	0.0149505	-0.280693	0.207723	0.292178	0.324554	-0.825743
-0.483366	1.30168	0.209703	-0.138911	0.0685149	0.178119	0.0761386	-0.0427723	0.533861	-0.020198	-0.497723	-3.70139	0.192772	-0.210198	-0.339505	-0.392871	0.0712871	0.115149	0.237525	0.448812	-0.241683	1.12752	0.177921	0.0848515	-0.0587129	0.288317	0.380891	-0.342277	0.389307	0.0975247	0.0115842	-0.165248	0.124851	0.560396	0.265347	-0.783366
-0.373168	1.37475	0.0908911	-0.117624	0.128812	0.0395049	0.147327	-0.0431683	0.384158	0.25297	-0.583168	-3.61723	0.119703	0.00049505	-0.441881	-0.180594	0.171188	0.293465	0.0428713	0.16297	-0.276733	1.01802	0.194653	0.33703	-0.285248	0.16396	0.324554	-0.162277	0.271188	0.161287	0.287228	-0.288614	-0.240891	0.504653	0.407426	-1.02188
-0.436337	1.47525	-0.125743	-0.154455	0.13	-0.0276238	0.0513861	-0.102277	0.392871	0.099604	-0.577327	-3.54089	-0.00613861	-0.391287	-0.232376	-0.127129	0.0571287	0.123861	0.227921	0.499604	-0.519901	1.23129	0.178218	0.0755446	-0.190495	0.387426	0.213861	-0.162277	0.182178	0.357129	0.154455	-0.139505	-0.45901	0.429208	0.410099	-0.948614
-0.577723	1.22584	0.31703	-0.292178	-0.0278218	0.277129	-0.0945545	-0.133564	0.471881	-0.0653465	-0.570792	-3.63455	-0.0422772	-0.271485	-0.112574	-0.00366337	0.0223762	0.18495	0.133861	0.466832	-0.224356	1.00139	0.29396	0.264059	-0.0760396	0.173069	0.314356	-0.251683	0.113465	0.0430693	0.311683	-0.201089	-0.674059	0.635347	0.201881	-1.21713
-0.631881	1.23644	-0.0893069	-0.0817822	0.253366	0.240693	0.219208	-0.0435644	0.408317	-0.0694059	-0.651287	-3.45673	-0.178416	-0.0916832	0.0905941	0.150693	0.214554	0.267129	0.248317	0.302475	-0.316337	1.11089	0.151683	0.229406	0.0387129	0.48802	0.354257	-0.341683	0.0809901	0.327426	0.206139	-0.0844555	-0.609703	0.431485	0.344257	-1.20594
-0.682574	1.24634	-0.11495	-0.059802	0.294356	0.17297	-0.0552475	-0.0439604	0.443267	0.0166337	-0.492673	-3.02911	-0.0230693	-0.45099	0.360693	0.0745545	0.11802	0.169109	0.0839604	0.239703	-0.310792	1.32257	0.0194059	0.244851	0.163069	0.230792	0.142277	-0.282871	0.300099	0.172079	0.479901	-0.0269307	-0.41505	0.598515	0.195446	-1.22168
-0.70703	1.15723	-0.0788119	-0.0956436	0.384356	0.0374257	-0.0812871	-0.16396	0.448515	-0.0782178	-0.601584	-3.10119	-0.0589109	-0.169307	0.451089	-0.0513861	0.0118812	0.060099	0.0175247	0.396931	-0.307624	1.24059	-0.00415842	0.235545	0.128119	0.262673	0.178515	-0.0921782	0.268218	0.514554	0.153069	0.0718812	0.213564	0.777129	0.117822	-1.29713
-0.671485	1.16941	0.117327	-0.0306931	0.295644	0.0909901	-0.146634	-0.135545	0.362574	0.0790099	-0.590495	-2.76673	0.0857426	-0.24703	0.410297	0.132673	0.353168	-0.0677228	-0.0768317	0.263861	-0.202376	1.29198	-0.240297	0.287129	0.0940594	0.413267	0.214059	-0.162475	0.106634	0.426139	0.302871	0.0282178	0.437921	0.603861	0.218317	-1.16475
-0.635644	1.20208	-0.00712871	-0.00633663	0.223564	-0.0370297	-0.171386	0.174752	0.277129	-0.0531683	-0.7	-2.40842	-0.0689109	0.152772	0.118614	0.0573267	0.40297	-0.0448515	-0.0211881	0.381089	-0.238713	1.0899	-0.154257	0.218812	-0.039703	0.164257	0.0891089	-0.0318812	0.206238	0.518317	0.32703	0.0232673	0.603762	0.623663	-0.050495	-0.965149
-0.749802	1.21287	-0.090099	0.0462376	0.544158	0.114356	-0.106436	-0.0758416	0.458614	-0.115644	-0.569208	-2.1105	0.0446535	0.0528713	-0.139109	-0.125743	0.361584	-0.181089	0.0629703	0.437723	-0.385644	1.19881	-0.106931	0.13396	0.17604	0.373663	0.120693	-0.163168	0.102574	0.516238	0.339703	-0.0116832	0.199604	0.483168	0.200693	-0.766238
-0.62297	1.25436	-0.0239604	-0.050297	0.445049	0.106337	-0.0611881	-0.0161386	0.368614	-0.178119	-0.486238	-1.66713	0.00930693	0.0720792	-0.244752	-0.0679208	0.229604	0.0333663	-0.0625743	0.464653	-0.26099	0.995842	0.0009901	0.030099	0.110495	0.338119	-0.0681188	-0.132871	0.010396	0.411584	0.389208	-0.23604	0.172376	0.588911	0.21	-0.756337
-0.610198	1.35495	-0.0753465	0.0632673	0.384752	0.0589109	-0.0253465	-0.167723	0.146733	0.039703	-0.634851	-1.06436	0.314059	0.271584	-0.311881	0.0183168	0.244158	-0.0918812	-0.0694059	0.40099	-0.318218	0.986931	0.0483168	-0.0566337	0.166139	0.29604	-0.0369307	-0.0628713	0.134257	0.839406	0.600891	-0.340099	-0.263564	0.360297	0.379901	-0.597129
-0.794356	1.29614	0.211386	-0.00475248	0.475347	-0.00762376	0.0687129	-0.0783168	0.365743	0.0341584	-0.682475	-0.611287	0.130891	-0.0213861	-0.157822	-0.0469307	0.0656436	0.0222772	-0.104951	0.396733	-0.258515	1.06743	-0.0543564	-0.0426733	0.160297	0.380792	-0.00782178	-0.25099	0.341089	0.742574	0.588812	-0.377525	-0.221386	0.276634	0.197327	-0.455049
-0.790396	1.14881	0.0278218	-0.0711881	0.382574	-0.0441584	-0.0856436	-0.139208	0.234554	-0.102277	-0.569505	-0.200396	0.216832	0.0671287	-0.104356	0.107228	0.174554	0.148317	-0.0517822	0.482772	-0.258812	1.15089	-0.0354455	0.131287	0.184752	0.244554	-0.00752475	-0.0009901	0.280099	0.576733	0.82802	-0.165842	-0.289208	0.204257	0.102574	-0.194554
-0.625743	1.12178	0.194059	0.0989109	0.161287	-0.0231683	-0.0406931	0.0392079	0.362376	-0.0175247	-0.935049	-0.0719802	0.181287	-0.00277228	-0.0232673	-0.118317	0.0216832	-0.137228	-0.0307921	0.356634	-0.228515	1.08446	-0.0881188	0.0433663	0.14802	0.395545	0.149406	-0.131584	0.309505	0.441881	0.523861	-0.0848515	-0.566634	0.507822	0.329406	-0.375644
-0.503267	1.04396	0.362376	0.0624753	0.344554	0.0009901	-0.00415842	0.040198	0.391188	-0.142475	-0.79396	0.58396	-0.164257	-0.144554	0.528317	-0.12297	0.128119	-0.0249505	-0.0957426	0.311089	-0.319802	0.918614	0.089802	0.0542574	0.112772	0.347822	0.146931	-0.09	0.090099	0.493564	0.477822	-0.21505	-0.12505	0.119802	0.247525	-0.277327
-0.427426	1.23851	0.400693	-0.00465347	0.532673	0.124158	0.0307921	0.139604	0.271782	-0.206238	-0.624059	0.719208	-0.0207921	0.28396	0.489406	0.0183168	-0.0259406	-0.0293069	-0.230693	0.125248	-0.0718812	0.912475	0.0477228	0.124257	0.0457426	0.430792	0.0760396	-0.129109	0.130693	0.485545	0.46396	0.146535	0.188713	0.385545	0.15495	-0.511485
-0.521584	1.18218	0.530594	0.0772277	0.401386	-0.0148515	0.0357426	0.16802	0.200198	-0.09	-0.613861	1.18356	-0.114158	0.0237624	0.610396	-0.080099	0.0775248	-0.154851	-0.0165347	0.209703	-0.0756436	1.0004	0.0646535	-0.0855445	0.162277	0.359703	0.172673	-0.0878218	0.0619802	0.536337	0.569406	0.139208	0.383366	0.0492079	0.159901	-0.352772
-0.505149	1.22792	0.758614	-0.019901	0.059802	-0.0222772	0.040099	0.0780198	0.138317	0.00811881	-0.513663	1.52822	0.12901	0.193564	0.322376	0.100594	0.0837624	-0.00821782	-0.201188	0.483564	-0.2	0.989505	0.141386	0.113762	0.405842	0.494951	0.0984158	-0.129406	0.00287129	0.738614	0.581188	-0.00069307	0.445842	0.0090099	0.326436	-0.343762
-0.377723	1.11257	0.620099	0.132376	0.396634	-0.0891089	0.0137624	-0.0241584	0.195248	-0.244356	-0.471881	1.43109	0.154059	0.0639604	0.181287	-0.0362376	0.0878218	-0.292574	-0.207327	0.407723	-0.174951	1.11772	-0.120297	-0.0969307	0.151584	0.41099	0.0647525	0.0305941	0.133564	0.702772	0.71297	0.019703	0.729505	0.217228	0.452574	-0.304455
-0.490297	1.12713	0.658416	0.0555445	0.235743	-0.156634	-0.0109901	0.0339604	0.191584	-0.156238	-0.330396	1.65396	0.118515	0.216238	-0.389802	-0.10396	-0.162178	0.0158416	-0.124455	0.283465	-0.117723	1.01614	-0.130495	0.0607921	0.175446	0.547426	0.0325743	-0.0584158	-0.0552475	0.594455	0.787525	-0.050495	0.448317	0.293663	0.33099	-0.0729703
-0.364455	1.04485	0.69703	0.208713	0.36604	-0.0131683	0.0552475	-0.0569307	0.0938614	-0.350198	-0.348911	1.68277	0.145149	0.139505	-0.146931	0.16802	-0.132772	-0.0457426	-0.539703	0.40099	-0.214554	0.76495	0.134951	-0.0948515	0.170495	0.413564	-0.0716832	-0.0584158	-0.0543564	0.406436	0.57802	-0.00316832	-0.0837624	0.120396	0.177129	-0.0642574
-0.289208	1.03188	0.578119	0.0425743	0.14604	-0.0178218	0.059505	-0.119109	0.207723	-0.193366	-0.454653	1.58158	0.10901	0.203564	-0.372178	-0.151881	-0.200198	0.0142574	-0.136238	0.0120792	-0.0689109	0.981881	0.12198	-0.120198	0.295248	0.326634	-0.0469307	-0.00059406	0.00663366	0.354951	0.714554	-0.428614	-0.520396	0.256733	0.314554	0.00346535
-0.310891	1.07703	0.62703	0.195149	0.20604	-0.143663	0.186535	-0.0291089	-0.0382178	-0.196436	-0.47505	1.91941	0.283663	0.0661386	-0.00029703	0.120396	-0.326733	0.116436	-0.0811881	0.225248	-0.324554	0.749703	0.00831683	-0.0552475	0.450891	0.616931	0.00594059	-0.222079	-0.0211881	0.503564	0.779802	-0.0355446	-0.487624	0.0812871	0.412277	0.0105941
-0.362277	0.923762	0.537525	0.029604	0.145446	-0.118911	-0.0542574	-0.0582178	-0.115644	-0.197426	-0.34396	1.94228	0.279901	0.0275248	0.366832	0.0251485	-0.21297	0.148614	-0.205446	0.247525	-0.270693	0.806337	0.0841584	0.0782178	0.316931	0.305941	-0.22	-0.163564	0.0109901	0.511881	0.715149	0.00712871	-0.384554	0.226238	0.171287	0.147723
-0.0730693	1.03267	0.516535	0.0240594	0.114851	-0.124851	0.202178	-9.901e-05	-0.24396	-0.140198	-0.616931	1.94574	0.0983168	-0.102673	0.422871	-0.0219802	-0.282277	-0.0110891	-0.239406	0.242871	-0.115644	0.716436	0.102079	-0.20901	0.312376	0.285248	-0.126535	0.114554	-0.17802	0.558911	0.750495	0.0782178	-0.162079	0.270396	0.207525	0.15703
-0.224158	0.930396	0.588614	0.179703	-0.0769307	-0.159406	0.206832	-0.15198	-0.00485149	-0.170792	-0.446733	2.07109	0.15802	-0.243465	0.580099	0.163366	-0.289703	0.0932673	-0.377129	0.265842	-0.0208911	0.676733	-0.00118812	0.0147525	0.366832	0.483366	0.0444555	-0.0376238	-0.0768317	0.456832	0.500495	0.180594	0.089703	0.182475	0.18505	0.0344554
0.0479208	0.876832	0.569406	0.205149	-0.00940594	0.0553465	-0.0357426	-0.0644554	-0.0456436	-0.167426	-0.334356	2.19851	0.0955446	-0.165842	0.545743	0.123762	-0.45	0.0989109	-0.253267	0.348515	-0.213663	0.588911	0.328614	0.0459406	0.272772	0.510495	-0.213564	-0.039703	-0.0440594	0.559208	0.379901	0.00891089	0.433762	0.32802	0.0591089	0.512475
-0.19	0.854455	0.551782	0.171089	0.170297	-0.167129	0.378218	-0.00564356	-0.0549505	-0.224653	-0.17297	2.26723	0.0658416	-0.0472277	0.232376	-0.0436634	-0.521188	-0.0245545	-0.419802	0.281386	0.0604951	0.625743	0.0990099	-0.172475	0.296931	0.460099	-0.194059	0.019703	-0.203168	0.793762	0.130891	0.019505	0.441485	0.401386	0.152772	0.550198
-0.0183168	0.843366	0.500099	0.0364356	0.0472277	-0.0520792	0.100396	-0.00693069	0.0848515	-0.291782	-0.00217822	2.58584	0.0636634	0.159802	0.00960396	0.0513861	-0.56297	0.0431683	-0.555446	0.244356	-0.162871	0.754455	0.217822	-0.262475	0.164455	0.467822	-0.0833663	0.144455	-0.172871	0.779208	0.309703	0	0.56396	0.501287	0.256139	0.748911
-0.137822	0.861089	0.540297	0.0720792	0.0738614	-0.119505	0.225644	-0.0679208	-0.10198	-0.440297	0.138911	2.43861	0.240495	0.0787129	-0.127822	0.0149505	-0.386634	-0.0118812	-0.270396	0.327228	-0.257228	0.886535	0.0467327	-0.204356	0.10297	0.405545	-0.212079	0.0395049	-0.200396	0.726535	0.399406	-0.119505	0.420396	0.481881	0.0667327	0.72505
-0.0570297	1.06366	0.550198	0.157228	0.100495	-0.0241584	0.360891	-0.162574	-0.0485148	-0.248416	0.147921	2.50723	0.090495	-0.0858416	-0.226436	0.0378218	-0.869703	-0.00475248	-0.275941	0.0385149	-0.143762	0.867129	0.285941	-0.205248	-0.0216832	0.409307	-0.0009901	0.00514851	-0.389208	0.775743	0.498119	-0.171485	0.0847525	0.331089	0.157327	0.612178
0.0116832	1.14594	0.649406	0.15099	-0.0919802	0.0627723	0.235545	-0.0741584	-0.273465	-0.217129	0.103069	2.61188	0.0893069	0.0236634	-0.263861	0.0619802	-0.411188	-0.0854455	-0.322772	0.00049505	0.0119802	0.882574	0.302673	-0.206238	0.126139	0.503663	-0.0811881	-0.059802	-0.200396	0.702475	0.335941	-0.0162376	-0.1	0.0924752	0.407327	0.736733
0.0237624	0.975149	0.599604	0.0857426	0.0943564	-0.102178	0.236832	-0.105347	-0.122079	0.00405941	-0.0130693	2.7802	0.0890099	0.110693	-0.151881	-0.0794059	-0.891683	0.0437624	-0.197129	0.0240594	-0.181683	0.85901	0.250297	-0.217228	0.0321782	0.316139	-0.0310891	-0.0629703	-0.481089	0.679505	0.422871	-0.0412871	-0.222871	0.323366	0.340396	0.772673
0.00554455	1.17307	0.609802	-0.140792	0.153465	-0.0768317	0.0593069	0.0133663	-0.319505	-0.15505	0.0720792	2.89218	-0.101287	0.0289109	0.251287	-0.05	-0.813168	0.215842	-0.331089	-0.113366	-0.0579208	0.816634	0.0312871	-0.150594	0.060099	0.439307	-0.07	-0.196337	-0.35604	0.728713	0.357624	-0.0391089	0.00277228	-0.0210891	0.0909901	0.998218
0.107228	1.12168	0.337228	0.0742574	-0.0656436	-0.169307	0.312772	-0.138119	-0.292277	-0.283267	0.337921	2.70475	0.118119	-0.0147525	0.43604	-0.0593069	-1.13832	0.0676238	-0.614455	0.12703	0.0261386	0.677426	0.169604	-0.121485	-0.0351485	0.378713	-0.241089	-0.101287	-0.181287	0.817921	0.415446	0.155248	-0.177921	0.0157426	0.313168	1.03376
0.089901	1.02248	0.405545	0.249901	0.0962376	-0.0430693	0.246238	-0.111782	-0.677228	-0.212673	0.352178	2.48782	-0.0727723	-0.178614	0.54703	-0.174158	-1.21287	0.237525	-0.4	0.117723	-0.0706931	0.880297	0.249406	-0.19604	-0.00851485	0.280297	-0.127822	0.0446535	-0.0234653	0.900495	0.221683	0.190891	0.019802	0.21198	0.222574	1.04426
0.29198	0.999901	0.294257	0.15505	0.124455	-0.0174257	0.248713	-0.142673	-0.61	-0.285149	0.430792	2.17248	0.0281188	-0.100693	0.729307	0.127228	-1.03743	0.309901	-0.374059	0.0418812	0.0434653	1.02297	0.235545	-0.231584	-0.0712871	0.370396	-0.11396	-0.0772277	-0.245644	0.822772	0.15703	0.101188	0.527228	0.0591089	0.18505	1.11386
0.214356	1.10851	0.363861	-0.0107921	0.0351485	0.0679208	0.252772	-0.0857426	-0.683069	-0.286733	0.517723	1.99396	0.149703	0.0791089	0.248515	-0.0868317	-1.11069	0.233762	-0.279604	-0.0889109	-0.153366	1.10525	0.223564	-0.116238	-0.0156436	0.430099	-0.319505	0.040297	-0.217129	0.682574	0.0226733	-0.0925743	0.623366	0.0665347	0.374158	0.873465
0.224554	0.905842	0.0316832	-0.0167327	0.0963366	-0.0232673	0.134653	-0.117228	-0.749505	-0.158317	0.756535	1.84267	0.0590099	0.0395049	0.111683	0.0241584	-1.34861	0.365842	-0.224554	0.0818812	0.0289109	0.982178	0.181188	-0.242376	0.0406931	0.337723	-0.184059	-0.112475	-0.185644	0.641089	0.139307	0.187426	0.450198	0.0145545	0.314158	0.910891
0.306337	1.01376	-0.00059406	-0.114158	0.0966337	-0.0573267	0.198119	-0.176634	-1.00693	-0.249208	0.646931	1.88089	0.17802	0.117129	-0.0429703	-0.0461386	-1.39505	0.318515	-0.287327	-0.175248	0.0204951	1.12693	0.0988119	-0.246733	0.0688119	0.394059	-0.227921	-0.0524753	-0.407228	0.939604	0.106238	-0.311584	0.294455	0.108614	0.302673	0.887426
0.438119	1.0899	-0.140396	0.0108911	0.0957426	0.0287129	0.142079	-0.148515	-1.04099	0.00108911	0.855149	1.58416	0.119901	0.325049	-0.0764356	0.0317822	-1.41238	0.240198	-0.291683	-0.183366	-0.106931	1.12604	0.0832673	-0.223861	0.00633663	0.320693	-0.27396	0.00326733	-0.306634	0.766931	0.235644	-0.340099	-0.0718812	0.117921	0.26495	0.74703
0.359901	1.16663	-0.010198	0.00683168	-0.154851	0.0243564	0.264257	0.00089109	-0.986931	0.00386139	0.783762	1.23089	0.0632673	0.0060396	-0.181089	-0.0981188	-1.79693	0.283465	-0.298515	0.117624	-0.245347	0.965743	0.0965346	-0.019703	0.121683	0.214752	-0.20099	0.0613861	-0.248218	0.694851	0.264158	0.0420792	-0.258416	0.156832	0.316931	0.812871
0.282277	1.20525	-0.0615842	0.0049505	-0.15604	0.106931	0.0161386	-0.119109	-1.08347	-0.0345545	0.804851	1.2897	-0.0620792	0.173267	-0.0851485	-0.206535	-1.65545	0.296139	-0.685049	-0.0792079	-0.0049505	1.23891	0.360693	-0.177129	-0.0616832	0.150099	-0.220099	-0.00108911	-0.335743	0.835941	0.440099	-0.0563366	-0.314951	0.121782	0.157921	0.660594
0.262178	1.19139	-0.0216832	-0.0375248	-0.184851	-0.0743564	0.0158416	-0.0908911	-0.897723	0.214158	0.765545	1.15822	0.131386	-0.0494059	-0.117624	-0.142376	-1.76505	0.399802	-0.471485	-0.247228	-0.261683	1.15238	0.345842	-0.155446	0.0264356	0.365842	-0.11802	0.0552475	-0.217921	0.752376	0.279505	-0.174158	-0.383366	0.26297	0.175248	0.635248
0.490198	1.10505	-0.326733	-0.0678218	-0.0633663	0.0122772	0.208317	-0.182772	-0.844554	0.21198	0.948812	0.871386	0.162277	-0.129604	0.248614	-0.246337	-1.69238	0.413366	-0.634851	-0.126535	-0.357624	1.24525	0.0491089	-0.132178	-0.0039604	0.321881	-0.354752	-0.0384158	-0.53099	1.02099	0.158614	0.0783168	-0.0933663	0.360495	0.123564	0.641683
0.308218	0.959406	-0.163366	-0.0969307	-0.0611881	-0.0213861	0.0493069	-0.124653	-0.911683	0.0928713	0.781089	0.879208	-0.0546535	-0.112673	0.437327	-0.150396	-1.65059	0.237921	-0.641386	-0.137327	-0.24505	1.08396	0.310891	-0.019604	-0.0342574	0.154455	-0.345149	-0.0117822	-0.131287	0.977723	0.090495	-0.0232673	0.118218	0.030099	0.109307	0.526931
0.196634	0.842772	-0.232178	-0.0654455	-0.148713	-0.248218	-0.0121782	0.0310891	-0.858218	0.0934654	0.902772	0.750099	0.0788119	0.00564356	0.0248515	-0.196832	-1.7305	0.380891	-0.458218	-0.277822	-0.153069	1.25356	-0.181386	-0.0870297	-0.224554	0.336139	-0.275248	0.0876238	-0.189109	1.05911	-0.161386	-0.0222772	0.255644	0.47099	-0.156139	0.501881
0.293168	0.945248	-0.13	-0.0632673	-0.116238	0.0268317	-0.0134653	-0.0419802	-0.807228	0.185644	0.823168	0.544653	0.141584	0.184455	0.333069	-0.101089	-1.86812	0.393564	-0.335644	-0.168317	-0.259505	1.00505	-0.0233663	-0.0357426	-0.194257	0.199604	-0.222871	0.0463366	-0.498812	1.10861	-0.0310891	0.0452475	0.602079	0.417525	0.299307	0.348713
0.270297	1.01822	0.181188	0.040495	-0.0844555	-0.0387129	0.0140594	-0.131089	-0.785842	-0.0328713	0.63297	0.436337	0.0821782	0.0461386	-0.0384158	-0.205446	-1.72455	0.496535	-0.280594	-0.0182178	-0.135743	1.20624	0.0837624	0.0740594	-0.0964356	0.22099	-0.343267	-0.0439604	-0.437525	0.849109	0.0889109	-0.0866337	0.640099	-0.0146535	0.121089	0.239505
0.186832	1.06218	0.17901	-0.0870297	-0.080396	0.147921	-0.0788119	0.0273267	-0.79297	0.24802	0.596436	0.204851	0.115545	-0.0255445	-0.350891	-0.210297	-1.81129	0.416733	-0.256238	-0.128515	-0.113762	1.31079	0.120891	-0.0667327	-0.135842	0.18297	-0.272475	0.204752	-0.366337	0.648713	0.238218	-0.0575247	0.46099	0.137822	0.0762376	0.341584
0.253267	0.785248	0.367426	-0.0541584	-0.0476238	0.0145545	-0.0218812	-0.133267	-0.920693	0.188713	0.549307	-0.324851	0.267723	0.0545545	-0.293069	-0.217129	-1.7601	0.427525	-0.543069	-0.0391089	-0.148416	1.44475	-0.0907921	-0.0511881	-0.135545	0.263069	-0.325446	0.0434653	-0.308218	0.603861	0.0578218	-0.4	0.214653	0.112772	0.0622772	0.262475
0.299208	0.958911	0.207129	0.0474257	-0.0745545	-0.110792	0.0744555	-0.165743	-1.00089	0.44	0.452475	-0.653762	0.273861	-0.203861	-0.233663	-0.179604	-2.2505	0.499307	-0.180495	-0.180891	-0.124951	1.3896	0.00782178	-0.0951485	-0.135842	0.0615842	-0.476832	0.0434653	-0.337228	0.363663	0.0178218	-0.311287	-0.532871	0.0259406	-0.0225743	0.394554
0.336931	1.09158	-0.0128713	-0.080396	0.0009901	-0.0870297	-0.0277228	-0.136337	-0.847426	0.441584	0.536238	-1.06307	0.0951485	0.167129	-0.262673	-0.18396	-2.2397	0.571683	-0.186337	-0.0732673	-0.289901	1.6301	-0.0744555	-0.05	-0.0374257	0.14198	-0.339109	0.141287	-0.153861	0.202871	0.116337	-0.184059	-0.526337	0.0878218	0.150693	0.601287
0.254951	1.16307	0.295545	0.0514852	-0.316238	-0.0622772	-0.0311881	-0.138119	-0.91802	0.323168	0.530396	-1.41248	0.128812	-0.059703	-0.105743	-0.187624	-2.09822	0.304059	-0.472178	-0.206535	-0.384851	1.4596	0.0220792	-0.0938614	-0.19901	0.218317	-0.462673	0.0421782	-0.0519802	0.210495	0.0160396	-0.256535	-0.678911	0.43	0.194851	0.178911
0.193663	0.944158	0.144653	0.0539604	-0.156832	0.0233663	-0.0948515	0.0818812	-0.865446	0.505248	0.462277	-1.52812	0.102574	-0.228911	0.391782	-0.237228	-2.42891	0.416139	-0.289604	-0.0416832	-0.359505	1.6595	-0.0920792	-0.0168317	-0.00930693	0.26604	-0.293366	0.0408911	-0.079802	0.00445545	-0.0755446	-0.0984158	-0.261188	0.343168	0.21	0.226238
0.115049	0.985347	0.115644	-0.0157426	-0.0640594	-0.0722772	0.0223762	-0.0172277	-0.902277	0.475842	0.426139	-1.82574	0.00514851	-0.107624	0.613267	-0.303663	-2.56743	0.429109	-0.235743	-0.177822	-0.304158	1.61	0.0744555	0.00019802	-0.0417822	0.314257	-0.444951	-0.08	-0.050198	-0.0994059	0.0129703	-0.0717822	0.0262376	0.273168	0.0361386	0.305049
0.287426	0.897426	0.298119	-0.0129703	-0.12	-0.0462376	-0.040396	0.172772	-0.718416	0.297129	0.671881	-1.64871	0.138515	-0.0506931	0.452574	-0.179307	-2.59	0.371782	-0.272574	-0.265347	-0.147228	1.6299	-0.0781188	-0.0758416	-0.263564	0.142475	-0.527822	0.0365347	-0.148911	-0.0248515	-0.299109	0.0892079	0.432376	0.0844555	0.050396	0.391188
0.049703	0.99604	0.180297	0.030396	-0.335644	-0.180891	-0.0728713	0.112475	-0.827723	0.418614	0.697921	-1.65366	0.170099	-0.0884158	0.394455	0.0229703	-2.67158	0.605446	-0.27604	0.0961386	-0.311881	1.77228	-0.130693	-0.160693	-0.175446	0.218317	-0.358515	0.0744555	0.0135644	-0.0414851	-0.15	-0.00861386	0.627624	0.210693	-0.0850495	0.558515
0.0905941	1.00624	0.274653	0.0925743	-0.205049	-0.0246535	-0.0743564	-0.0168317	-0.738515	0.302673	0.474752	-1.59238	0.203168	0.156535	-0.0442574	-0.0422772	-2.75257	0.651782	-0.403069	-0.079901	-0.186535	1.60644	-0.00326733	0.234851	-0.233267	0.0753465	-0.380198	0.0740594	-0.115149	-0.0357426	-0.0927723	-0.0677228	0.473168	0.326634	0.121089	0.676436
0.0119802	0.796436	0.277822	0.0354455	-0.300693	-0.117426	-0.0758416	0.171584	-0.720297	0.423069	0.633465	-1.61743	0.176535	0.209109	-0.233663	-0.0194059	-2.71545	0.543564	-0.288614	-0.126634	-0.069604	1.69248	0.029802	0.157228	-0.0135644	0.342673	-0.535842	0.00405941	0.0458416	-0.079604	-0.0936634	-0.0049505	0.197822	0.203861	0.137525	0.695941
-0.0365347	0.824851	0.101881	0.0360396	-0.0779208	-0.00148515	0.0513861	0.242475	-0.832673	0.363663	0.824059	-1.38505	0.210594	-0.0489109	-0.235842	-0.0874257	-2.76891	0.680891	-0.0732673	0.00455446	-0.193663	1.67752	0.00386139	-0.17604	-0.0132673	0.329307	-0.442376	0.0328713	0.0761386	0.0239604	-0.156139	-0.0924752	0.241782	0.384851	0.0226733	0.806337
0.25703	1.0204	-0.0243564	-0.0287129	-0.134851	-0.153069	-0.020099	0.110297	-0.718416	0.261782	0.696832	-1.1901	0.304653	0.107327	-0.233069	-0.210792	-2.48277	0.516337	-0.113762	-0.106832	-0.298317	1.51267	0.167921	0.115644	-0.104851	0.314158	-0.220495	0.0710891	-0.114158	-0.113861	-0.0410891	-0.531188	-0.0444555	0.379604	-0.214059	0.547327
0.090297	0.956634	0.0365347	0.162178	-0.133366	-0.285644	-0.0212871	0.238812	-0.674851	0.362772	0.728416	-0.85495	0.248119	-0.0576238	-0.295545	-0.126337	-2.59594	0.711782	-0.0881188	-0.00980198	-0.172079	1.7297	0.142574	0.0377228	-0.0435644	0.228119	-0.277723	0.070198	0.0164356	-0.203069	-0.0453465	-0.431485	-0.29297	0.249901	-0.139505	0.687723
0.0754455	0.961683	-0.0224752	0.195248	-0.352475	-0.199406	-0.0534654	0.0166337	-0.56396	0.333069	0.579703	-0.769505	0.255149	0.0968317	-0.0433663	-0.220396	-2.3104	0.54604	0.0285149	-0.0890099	-0.147327	1.52604	0.0456436	0.179802	0.0474257	0.12297	-0.305545	0.127723	0.267426	-0.0708911	0.0724753	-0.248713	-0.289604	0.278911	-0.182772	0.617822
0.121881	0.994158	-0.182772	-0.0825743	-0.29099	-0.0431683	-0.146238	0.0163366	-0.334455	0.265248	0.550891	-0.680495	0.171287	-0.15901	0.149109	-0.104653	-1.76366	0.621782	-0.156436	-0.109406	-0.151386	1.6105	0.049604	0.124356	-0.102871	0.134356	-0.365842	0.185248	0.358713	-0.209505	-0.05	-0.303762	-0.253663	0.249208	-0.168218	0.479208
-0.0523762	1.01822	-0.273366	0.0107921	-0.158515	-0.105347	-0.147228	0.164158	-0.38703	0.268614	0.453663	-0.558614	0.268416	-0.323564	0.180297	-0.229604	-1.63624	0.696634	-0.0112871	-0.00980198	-0.0369307	1.78564	0.0838614	0.23396	-0.0712871	0.146139	-0.184257	-0.00386139	0.267723	-0.138713	-0.243168	-0.361584	-0.118317	0.0907921	-0.154257	0.413069
0.15396	0.889802	-0.274653	-0.196139	-0.229802	-0.0175247	-0.0891089	0.132376	-0.476238	0.0907921	0.395842	-0.171782	0.154653	-0.20099	0.493069	-0.204257	-1.39851	0.591485	0.0809901	0.089802	-0.130594	1.81129	0.38	0.245446	-0.0391089	0.188911	-0.300891	0.0255445	0.266238	0.15	-0.0994059	-0.238812	0.445446	0.309802	-0.262475	0.625644
0.0840594	1.08475	-0.246535	-0.161485	-0.228515	-0.107228	-0.124059	0.160495	-0.456931	-0.0970297	0.372673	0.175941	0.159307	-0.0881188	0.333663	-0.26802	-1.33168	0.536337	0.0454455	-0.110297	-0.00673267	1.86733	-0.0522772	-0.0327723	-0.0978218	0.131881	-0.150891	0.125248	0.146238	-0.060099	-0.355545	-0.198812	0.547327	-0.0019802	-0.320693	0.682871
0.0726733	1.14663	-0.368416	-0.00871287	-0.28604	-0.0488119	-0.152772	0.188317	-0.390396	-0.0651485	0.381287	0.377426	0.34495	-0.0939604	-0.0947525	-0.185842	-1.13574	0.618416	0.159307	0.0180198	-0.00831683	1.70465	-0.0186139	0.166832	-0.135347	0.0533663	0.0382178	0.156139	0.323762	0.100495	-0.276931	-0.355644	0.390693	0.119307	-0.400198	0.678218
-0.0381188	1.07792	-0.281782	-0.0362376	-0.403861	0.010198	-0.185545	0.124851	-0.319604	-0.0942574	0.293663	0.674455	0.138119	-0.129505	-0.404158	-0.532277	-1.1298	0.531683	0.181188	-0.0626733	0.0161386	1.79287	-0.204257	0.144951	0.0833663	0.434257	0.139109	0.0674257	0.198218	0.211683	-0.0380198	-0.543465	0.553762	0.252673	-0.197822	0.766337
0.140693	1.25891	-0.375446	-0.00376238	-0.22297	-0.080396	-0.12901	0.0635644	-0.120594	-0.0648515	0.467327	0.871782	0.234257	-0.0748515	-0.531089	-0.228416	-0.771386	0.543762	0.305941	-0.12396	-0.117525	1.56228	-0.171485	0.284257	-0.00940594	0.0347525	0.171584	0.187723	0.285743	0.00376238	-0.210693	-0.381584	-0.0437624	-0.0651485	-0.318218	0.705149
-0.0219802	1.2299	-0.380396	-0.0306931	-0.180495	-0.170693	-0.129901	0.0607921	-0.261287	0.276139	0.293762	1.08129	0.148911	0.0480198	-0.586436	-0.175248	-0.573366	0.556733	0.393465	-0.116832	0.0105941	1.74327	0.0215842	0.192376	0.079703	0.144059	0.264059	0.0977228	0.190792	0.325545	-0.0633663	-0.318812	-0.0712871	0.124257	0.0454455	0.632475
-0.00247525	1.04277	-0.384752	0.00118812	-0.219901	-0.0506931	-0.233663	0.148911	-0.133861	0.247426	0.411782	1.35208	0.0232673	-0.238218	-0.525149	-0.153267	-0.462871	0.347624	0.390297	0.0466337	0.189703	1.68178	-0.194653	0.111386	0.0494059	0.184257	-0.0144554	0.128317	-0.0947525	0.175545	-0.0785148	-0.314851	-0.286337	0.153663	-0.07	0.631881
0.107327	1.10406	-0.521584	0.163069	0.0450495	0.050198	-0.196436	0.0564356	-0.155149	0.280891	0.178812	1.49931	0.249505	-0.211584	0.0357426	-0.102277	-0.456733	0.711188	0.55	-0.00772277	0.255644	1.89119	-0.0328713	0.150297	0.0463366	0.251386	0.176139	0.251089	0.0169307	0.0279208	0.0269307	-0.372079	-0.221683	-0.509109	-0.216139	0.760693
0.0368317	1.09475	-0.527129	0.00217822	0.0114851	-0.050198	-0.331683	-0.0451485	-0.176832	0.222772	0.446436	1.71842	0.122277	-0.154059	0.170099	-0.0117822	-0.509406	0.62604	0.327129	0.0272277	0.0647525	1.8203	-0.0921782	0.159307	0.0460396	0.0978218	0.177723	0.00079208	-0.019802	0.170297	0.0111881	-0.307723	-0.215545	-0.0115842	-0.42505	0.694059
0.0269307	0.973465	-0.53703	0.166832	-0.0751485	-0.0217822	-0.143762	0.0542574	-0.259109	0.102376	0.498416	1.99624	0.258812	-0.187822	0.355347	-0.020396	-0.414851	0.578416	0.383366	0.00158416	0.213861	1.97129	-0.0605941	0.0377228	0.0745545	0.00594059	-0.0444555	0.0745545	-0.0557426	0.0864356	-0.16396	-0.392475	-0.0515842	0.203168	-0.340198	0.666832
0.0185148	0.930495	-0.636931	0.144257	-0.160792	0.0786139	-0.208119	-0.0060396	-0.0651485	0.102673	0.420396	2.02287	0.0421782	-0.222772	0.429703	0.190297	-0.0330693	0.563267	0.353069	-0.0937624	0.281782	2.00317	-0.118416	-0.0429703	-0.0760396	0.142079	0.0465346	0.00821782	-0.030099	0.413168	-0.241881	-0.456931	0.447822	0.190396	-0.297129	0.601782
0.0119802	0.675248	-0.589604	0.150099	-0.0355446	-0.050396	-0.401881	-0.00851485	-0.089604	-0.0558416	0.444455	2.2301	0.207525	-0.326139	0.274059	0.214356	-0.368812	0.578713	0.322079	0.0390099	0.370495	2.09535	-0.15505	0.0938614	0.0424752	0.268911	0.0765346	0.20099	-0.0666337	0.335248	-0.231287	-0.232277	0.583069	-0.0226733	-0.382574	0.577327
-0.0251485	0.720297	-0.760099	0.153762	0.0682178	-0.0485148	-0.213762	0.210594	0.0346535	0.0450495	0.350792	2.53832	0.213069	-0.197327	0.0871287	-0.0448515	-0.145743	0.503861	0.441188	-0.0166337	0.497723	2.24871	-0.181287	-0.0587129	0.0734653	0.185347	0.0768317	0.114059	0.049901	0.125446	-0.221089	-0.259802	0.614257	0.00425743	-0.296832	0.388515
-0.161683	0.65297	-0.584851	0.248713	-0.0274257	0.0521782	-0.345941	0.0484158	0.00772277	0.0453465	0.407426	2.62465	0.148713	-0.231287	0.122673	0.0689109	0.0151485	0.270198	0.482772	-0.0810891	0.277129	2.25158	-0.331881	-0.0818812	0.0140594	0.150297	-0.0734653	-0.0137624	-0.135347	0.384158	-0.399703	-0.477327	0.735545	0.211485	-0.383168	0.390594
-0.00564356	0.545941	-0.721881	0.191782	-0.0824752	-0.106238	-0.320594	-0.0537624	0.109901	0.226931	0.273069	3.03248	0.0945545	-0.331881	-0.490495	0.0933663	0.146931	0.286238	0.352772	-0.28802	0.497426	2.27416	-0.0825743	0.0731683	0.0443564	0.0965346	0.0478218	0.0190099	-0.0843564	0.396832	0.020198	-0.37703	0.545842	0.241188	-0.241188	0.454257
0.0769307	0.627327	-0.928515	0.257129	0.0446535	0.0568317	-0.225545	0.0456436	-0.137624	0.0791089	0.270891	3.1803	0.380792	-0.482475	-0.514554	0.0587129	0.30901	0.331386	0.265248	0.175347	0.275644	2.30426	-0.183861	0.0478218	0.0724753	0.190594	-0.0121782	0.182079	-0.0274257	0.498911	0.15297	-0.254554	0.0561386	0.149406	-0.448515	0.52396
-0.239604	0.588713	-0.72396	0.421782	0.0162376	0.0208911	-0.510495	-0.0543564	-0.0348515	0.140396	0.457525	3.33723	0.235743	-0.204951	-0.0981188	0.242574	0.438416	0.156832	0.166535	-0.188119	0.46505	2.36347	-0.115149	-0.0341584	0.0142574	0.283663	-0.0112871	0.276337	-0.19396	0.40703	0.0741584	0.0589109	-0.264158	0.148515	-0.436436	0.426436
-0.246733	0.451287	-0.961287	0.266139	-0.0391089	-0.0357426	-0.518218	-0.145545	0.029802	0.0518812	0.204158	3.29574	0.0488119	-0.427129	-0.343762	-0.104851	0.279703	0.172673	0.194653	-0.0953465	0.336238	2.41535	-0.21297	0.00178218	0.0127723	0.388317	-0.104059	0.0282178	-0.128614	0.447525	0.175941	-0.0270297	-0.381683	0.107228	-0.615248	0.546139
-0.312574	0.208911	-0.88802	0.329505	0.0258416	0.0670297	-0.46505	0.0719802	0.0960396	0.144951	0.702277	3.3595	-0.194653	-0.239208	0.0590099	-0.0534654	0.5	0.347822	0.226238	-0.184752	0.335941	2.28455	-0.301089	-0.0222772	0.0721782	0.20297	-0.0740594	0.102772	-0.0448515	0.488911	-0.0335644	0.195149	-0.378317	0.177525	-0.633465	0.352079
-0.284752	0.254356	-1.18842	0.182871	0.0625743	0.030099	-0.44	0.0673267	0.394356	0.0170297	0.26297	3.26446	-0.217822	-0.341089	0.225446	-0.251188	0.413069	0.0432673	0.515248	-0.090099	0.242871	2.31554	-0.15198	-0.207228	0.0391089	0.26604	0.145347	0.105842	0.0768317	0.41099	0.105149	0.196733	-0.154257	0.137525	-0.534257	0.44802
-0.480594	0.26802	-1.04752	0.338416	0.289307	0.00108911	-0.474356	0.122079	0.210891	-0.132376	0.350495	3.49168	0.0377228	-0.245149	0.259208	0.0193069	0.45703	0.0877228	0.414257	-0.0869307	0.201287	2.21584	-0.58505	-0.0709901	-0.0839604	0.355743	-0.106238	0.0695049	-0.177228	0.672475	0.113762	0.259208	0.189109	-0.0867327	-0.363465	0.501584
-0.515248	0.0291089	-1.03762	0.133366	0.0445545	-0.0604951	-0.480594	-0.0734653	0.249901	-0.0986139	0.28901	3.56158	-0.0848515	-0.126337	0.099802	0.01	0.709505	-0.0486139	0.545149	0.0133663	0.302574	2.08465	-0.339703	-0.164158	-0.0273267	0.0482178	-0.0184158	0.0135644	0.0690099	0.684554	-0.040396	0.320693	0.129703	0.223267	-0.475743	0.464851
-0.389307	0.0411881	-0.809208	0.226436	0.301386	0.070099	-0.367723	0.020297	0.230099	-0.225545	0.376535	3.76119	-0.00891089	0.122178	-0.0453465	-0.148614	0.68198	-0.0928713	0.26703	-0.0851485	0.172277	2.11129	-0.311881	0.0317822	-0.0313861	0.050099	-0.019901	0.23604	0.0324752	0.567228	0.0958416	0.0119802	0.501584	0.163267	-0.403366	0.418416
-0.30396	0.0129703	-0.957129	0.291386	0.278515	0.351089	-0.433267	-0.0471287	0.0290099	-0.123465	0.342277	3.70356	-0.00267327	0.119406	-0.112574	0.0223762	0.813564	0.0731683	0.270099	-0.202673	0.303564	2.00762	-0.382772	0.00861386	-0.223168	0.171386	-0.111782	0.208812	-0.0118812	0.518416	-0.14703	-0.0161386	0.103762	0.27396	-0.391881	0.569208
-0.33802	-0.285842	-0.875644	0.385049	0.374951	-0.0267327	-0.470099	0.166733	0.0389109	-0.059505	0.578317	4.13059	-0.0352475	0.185347	-0.107921	-0.0460396	0.50505	-0.0310891	0.334158	-0.200198	0.245743	2.15426	-0.384059	-0.0152475	-0.00663366	0.141386	-0.183069	0.155248	0.0860396	0.333663	-0.168416	0.11198	0.0350495	0.337723	-0.193465	0.37
-0.252376	-0.187822	-0.894455	0.429703	0.263564	-0.0548515	-0.287525	-0.00158416	-0.203069	-0.0586139	0.232376	3.66356	-0.0860396	-0.0090099	-0.162673	-0.0256436	0.535941	-0.175644	0.307624	-0.0470297	0.206733	1.96089	-0.286832	-0.0394059	-0.13099	0.172673	0.0341584	0.189802	-0.0151485	0.23802	0.116832	0.139802	-0.243069	0.142475	-0.376634	0.550495
-0.28604	0.00029703	-0.945149	0.394059	0.302772	0.198317	-0.204257	-0.170198	0.145545	0.10505	0.386535	3.48564	-0.0786139	0.107228	-0.0968317	0.245743	0.340297	-0.280495	0.154059	-0.136139	0.179505	2.07782	-0.350891	-0.0341584	0.0146535	0.199604	-0.120198	0.136238	0.0551485	0.331683	0.180495	0.288218	-0.837327	0.0616832	-0.337723	0.470891
-0.346931	0.108416	-0.846238	0.468713	0.120594	0.0832673	-0.373564	-0.079505	0.0957426	0.106931	0.443366	3.40465	-0.0432673	0.0750495	0.0678218	0.0865347	0.376238	-0.336634	0.251485	-0.223663	0.279208	1.94485	-0.573069	0.0019802	-0.177822	0.0974257	-0.252673	0.0733663	0.395149	0.182079	0.184257	0.320099	-0.720396	0.526139	-0.297228	0.345644
-0.378416	0.0140594	-0.866733	0.22495	0.226436	0.0460396	-0.380693	-0.128812	-0.144951	0.0779208	0.399307	3.03426	-0.0980198	0.142871	0.130891	0.0776238	0.46099	-0.323663	0.165149	-0.0039604	0.248614	1.8997	-0.486832	-0.182178	0.17	0.225842	0.0257426	0.179802	0.33703	0.0529703	0.0982178	0.289703	-0.785347	0.211485	-0.446733	0.364257
-0.380297	-0.173762	-0.88802	0.255941	0.104158	0.21099	-0.41901	0.0243564	-0.0957426	0.08	0.587129	3.01545	-0.059901	0.0969307	0.767723	0.346436	0.39297	-0.179406	0.363465	-0.161188	0.309604	1.67545	-0.582079	0.134653	-0.0821782	0.0352475	0.245743	-0.00405941	0.146436	-0.139802	-0.177426	0.320594	-0.536238	0.295941	-0.334653	0.134059
-0.263762	0.26	-0.881485	0.408416	0.363366	0.184356	-0.324257	-0.204059	-0.186832	0.23396	0.454059	3.11416	-0.173069	-0.0258416	0.674851	-0.103465	0.452475	-0.415743	0.153663	-0.220198	0.311485	1.8799	-0.40604	-0.00920792	-0.241881	-0.0378218	0.184455	0.0608911	0.147723	-0.144059	-0.0836634	0.790594	-0.0949505	0.350693	-0.763267	0.0544555
-0.294059	0.0991089	-0.874059	0.319604	0.120792	0.247723	-0.400495	-0.0514852	0.0458416	0.0836634	0.523465	2.77693	-0.105644	-0.129307	0.681683	-0.14396	0.438812	-0.242772	0.384158	-0.129901	0.343366	1.84287	-0.439406	0.0557426	-0.115248	0.120594	0.124158	-0.0217822	0.237723	-0.0283168	-0.141485	0.731881	0.15505	0.281683	-0.441188	0.104257
-0.0787129	0.0060396	-0.870297	0.453366	0.19604	0.0295049	-0.307921	-0.161386	0.0875247	0.115545	0.550693	2.94158	0.0623762	0.0295049	0.508218	0.29099	0.55396	-0.269208	0.393762	-0.0649505	0.372376	1.63822	-0.503762	0.090297	-0.187723	0.208119	0.124158	0.0447525	0.0874257	0.0352475	-0.208119	0.450891	0.15505	0.303366	-0.332475	0.0365347
-0.111188	0.0316832	-0.825049	0.545545	0.352871	0.221089	-0.415644	-0.232574	-0.0206931	-0.0131683	0.357921	2.52861	0.131089	0.188218	-0.0168317	0.00356436	0.421584	-0.253762	0.403069	-0.153762	0.283663	1.6296	-0.508416	0.0671287	-0.0907921	0.26495	0.0535644	-0.0375248	0.0864356	0.0620792	0.0471287	0.350891	0.121584	0.446535	-0.262871	0.149208
-0.244653	0.143366	-0.952574	0.26802	0.358416	0.284851	-0.352475	-0.08	-0.188911	-0.0415842	0.635149	2.44564	0.169802	0.248218	-0.172178	0.11703	0.377921	-0.200495	0.353564	-0.242772	0.255842	1.49158	-0.382178	0.0149505	-0.0638614	0.0727723	0.214158	0.119208	0.205842	-0.0431683	-0.259802	0.39396	0.0866337	0.158515	0.277129	-0.108515
-0.120198	0.105248	-1.10287	0.209604	0.39495	0.197624	-0.110495	-0.21703	-0.176634	-0.010297	0.564257	2.39762	-0.0411881	0.154752	-0.13604	0.110792	0.115248	-0.154455	0.424059	-0.462178	0.315842	1.38198	-0.266535	0.0793069	-0.0669307	0.141188	0.212574	0.0656436	0.306436	-0.0769307	0.0511881	0.173069	-0.263663	0.119208	0.414851	0.0450495
-0.222376	-0.0318812	-1.19594	-0.0395049	0.463267	0.448317	-0.186436	-0.344158	-0.133069	-0.0394059	0.371782	2.48109	-0.282277	0.154158	0.0310891	0.0127723	0.323465	-0.241089	0.598317	-0.37	0.183069	1.2999	-0.389901	-0.0739604	-0.101881	0.16901	0.273168	0.131881	-0.194851	-0.243366	0.122376	0.349901	-0.484356	0.424554	0.480693	-0.0626733
-0.0969307	-0.0820792	-0.918416	-0.105446	0.070396	0.138317	-0.12297	-0.200891	-0.308515	0.0911881	0.470198	2.6402	-0.184851	0.273564	0.00792079	-0.125248	0.319802	-0.256238	0.510693	-0.308515	0.179703	1.09851	-0.392673	0.152871	-0.135941	-0.155347	0.213762	0.171188	0.203861	-0.131683	-0.126337	0.197426	-0.513168	-0.0235644	0.606238	-0.00920792
0.0615842	0.127426	-0.863069	-0.103564	0.324752	0.318911	-0.10099	-0.110396	-0.130594	0.180891	0.174356	2.56812	-0.0465346	0.214851	0.354158	-0.163861	0.210198	-0.144158	0.335446	-0.369703	-0.00247525	1.32396	-0.366733	-0.0878218	-0.169703	0.0594059	0.0934654	0.0895049	0.264752	-0.105743	-0.254851	0.254951	-0.293168	0.11802	0.612475	-0.16604
0.0279208	0.0169307	-0.769307	-0.192673	0.300297	0.290495	-0.238713	-0.119604	-0.0810891	-0.040396	0.480099	2.74941	-0.0975247	0.155842	0.389406	-0.232574	0.147129	-0.321782	0.510594	-0.309703	0.145049	1.00129	-0.372673	-0.0482178	-0.0552475	0.0851485	0.213168	0.129406	0.206535	-0.109703	-0.314554	0.692772	-0.263861	0.0481188	0.688713	-0.0531683
-0.0183168	-0.0248515	-0.558614	-0.280891	0.36901	0.482673	-0.0264356	-0.00673267	-0.150693	-0.100396	0.475446	2.59089	-0.156436	0.303069	0.612475	-0.124257	0.156436	-0.248515	0.498812	-0.209703	0.202574	0.888911	-0.00118812	-0.0980198	-0.089604	0.140891	0.185941	0.0471287	-0.0734653	-0.273069	-0.316436	0.497822	-0.235149	0.0666337	0.695545	-0.089703
0.226436	0.020297	-0.507327	-0.282079	0.28703	0.355446	-0.12198	-0.103861	-0.00247525	-0.100099	0.658713	2.78584	0.0709901	0.184356	0.517129	-0.166931	0.216733	-0.32703	0.486436	-0.369109	0.140396	0.805049	-0.281485	0.0418812	-0.184554	0.0453465	-0.0615842	0.0560396	-0.0422772	-0.202772	-0.435248	0.775347	0.0848515	0.30703	0.668119	-0.136139
0.222475	-0.0535644	-0.576931	-0.412673	0.293465	0.297327	-0.0384158	-0.201881	-0.144455	-0.161386	0.648218	2.66297	0.148119	0.304951	0.211386	-0.242376	0.0970297	-0.31901	0.314752	-0.340594	0.080396	0.692079	-0.127327	0.0792079	-0.0706931	-0.0590099	0.0604951	0.0950495	-0.040396	-0.243069	-0.440198	0.683564	0.0820792	0.163465	0.732772	-0.322574
0.186337	-0.195941	-0.368614	-0.222673	0.38901	0.239208	0.0538614	-0.208119	-0.123465	-0.162673	0.447426	2.51257	-0.00326733	0.554951	0.0654455	-0.386634	0.0388119	-0.159109	0.495446	-0.275545	0.108911	0.517327	-0.102574	0.0178218	-0.135347	0.0254455	-0.0545545	0.0736634	-0.128218	-0.185545	-0.412376	0.520495	0.389307	0.529208	0.605842	-0.238119
0.338812	-0.121683	-0.410693	-0.352376	0.424951	0.240396	0.107129	-0.255248	-0.162772	-0.204257	0.625644	2.01218	0.0923762	0.40495	-0.0645545	-0.144851	0.0721782	0.0104951	0.515842	-0.250792	-0.113168	0.431683	-0.138515	0.247129	-0.168218	0.120792	0.111683	0.110495	0.0911881	0.135149	-0.444554	0.428614	0.079703	0.357228	0.490495	-0.0924752
0.423564	-0.138119	-0.643366	-0.102673	0.342673	0.401683	0.19099	-0.223861	-0.13901	-0.0433663	0.486337	1.77455	0.00920792	0.466733	-0.283267	-0.512772	0.210198	-0.201782	0.597822	-0.229802	0.0146535	0.383762	-0.143168	0.0773267	-0.0528713	0.174851	-0.0417822	0.0588119	-0.0685149	0.0658416	-0.329208	0.177723	-0.243465	0.268614	0.71703	-0.0380198
0.0752475	-0.154455	-0.437228	-0.22396	0.188911	0.431386	0.123564	-0.331584	-0.296436	-0.0712871	0.411782	1.50822	0.325149	0.248317	-0.28198	-0.399208	-0.119604	-0.131584	0.429208	-0.210099	-0.0871287	-0.0554455	-0.177228	0.145941	0.0736634	0.00930693	0.0562376	0.0965346	-0.101287	0.00861386	-0.243267	0.268614	-0.614059	0.28505	0.695149	-0.354554
0.0681188	-0.244851	-0.511782	-0.255545	0.387525	0.303564	0.0861386	-0.278713	-0.0266337	-0.199802	0.517327	1.17248	0.177921	0.126535	0.190495	-0.324653	-0.109703	0.00673267	0.509901	-0.0691089	-0.0878218	0.174851	-0.0649505	0.184653	0.0990099	0.224455	0.159307	0.0442574	-0.0158416	-0.0222772	-0.176931	0.429505	-0.773762	0.146238	0.480099	-0.171683
0.182475	-0.296733	-0.469703	-0.13703	0.516535	0.245743	0.138119	-0.286139	-0.226238	-0.158911	0.41	1.17792	0.146337	0.306535	0.226931	0.0383168	-0.0710891	-0.232376	0.719703	-0.0393069	-0.0878218	0.115446	-0.0723762	-0.0260396	-0.0669307	0.176733	0.00425743	0.14198	-0.0186139	0.183663	-0.399703	0.430792	-1.08416	0.303366	0.575941	-0.305644
0.0562376	-0.45	-0.548317	0.0535644	0.378911	0.407327	0.0691089	-0.384554	-0.266436	-0.127723	0.384851	1.28158	-0.0690099	0.127129	0.392178	-0.295248	-0.21	-0.193465	0.548614	-0.020099	-0.179703	-0.0630693	0.00990099	-0.0474257	0.118416	0.019901	0.0695049	0.148119	0.019505	-0.00752475	-0.504653	0.430792	-0.612673	0.196634	0.358713	-0.341881
0.0506931	-0.417129	-0.719406	-0.255149	0.450693	0.369802	0.0944554	-0.202574	-0.468218	-0.25802	0.397525	1.20901	0.00752475	-0.00128713	0.58802	-0.239802	0.0213861	-0.155149	0.507822	-0.100891	-0.0918812	0.0393069	-0.147228	0.299901	-0.0153465	0.0417822	0.102277	0.376535	-0.114158	0.118119	-0.511782	0.327129	-0.169604	0.302178	0.422772	-0.287426
-0.0158416	-0.196139	-0.624752	-0.225149	0.298812	0.313564	0.0570297	-0.151485	-0.22505	-0.157723	0.40703	1.12673	0.103069	0.220594	0.463267	-0.133663	0.00584158	-0.368317	0.407624	0.0451485	0.0684158	-0.0773267	-0.153366	-0.0642574	0.108812	0.154356	-0.0427723	0.282673	-0.307525	0.265049	-0.578614	0.17396	0.113465	0.447327	0.367426	-0.232079
0.160099	-0.389505	-0.679802	-0.193861	0.349307	0.223861	-0.0506931	-0.349505	-0.140891	-0.319307	0.456238	1.10683	0.210495	0.130198	0.246634	-0.208218	-0.0736634	-0.480297	0.607723	0.0314852	-0.0512871	-0.22495	-0.102376	0.0634654	-0.0530693	0.118515	-0.0388119	0.080099	-0.251485	0.20198	-0.423564	0.141188	0.144455	0.396931	0.341089	-0.268614
0.25396	-0.58198	-0.767426	-0.103861	0.321089	0.0650495	-0.0881188	-0.225644	0.0150495	-0.19802	0.335248	0.912178	0.215446	0.250792	0.193366	-0.164554	0.101485	-0.292475	0.477525	-0.0130693	-0.178812	-0.241584	0.049604	0.138119	-0.0555445	-0.0506931	0.305446	0.206634	-0.0942574	0.0955446	-0.531584	-0.0491089	0.517921	0.43901	0.404554	-0.379802
0.147723	-0.468416	-0.884059	0.0564356	0.332178	0.137624	0.00445545	-0.422772	0.0724753	-0.12802	0.314257	0.653564	0.12099	0.470495	-0.0786139	-0.149109	-0.103069	-0.538416	0.497723	0.0310891	-0.0175247	-0.199406	-0.089901	-0.176931	-0.0880198	0.100297	0.337624	0.242178	-0.21703	0.22099	-0.348416	-0.112871	0.314356	0.101386	0.377327	-0.23099
0.0830693	-0.348317	-0.884653	-0.253564	0.442079	0.040396	-0.0726733	-0.209901	0.321584	-0.0665347	0.102277	0.700198	0.157129	-0.0316832	-0.326139	-0.352772	-0.0438614	-0.404356	0.696238	0.365347	-0.0446535	-0.416139	0.153663	0.150396	0.0988119	0.090099	0.37099	0.30802	-0.161683	0.145743	-0.351782	0.0371287	-0.188911	0.524653	0.379208	-0.272475
0.210297	-0.517327	-0.78901	0.0273267	0.392277	0.143861	-0.109406	-0.34604	0.508515	-0.195842	0.138416	0.855248	0.195743	0.155545	-0.0120792	-0.457921	-0.182178	-0.340891	0.502079	0.101683	0.0160396	-0.342475	0.0552475	0.0568317	-0.0636634	0.0413861	0.284752	0.284554	-0.196634	0.21396	-0.326733	-0.242277	-0.395446	0.0664356	0.349802	-0.131386
0.0109901	-0.438713	-0.824257	-0.030495	0.525248	0.144752	0.102277	-0.194752	0.534851	-0.12396	0.176139	0.429505	0.0216832	0.0864356	-0.0977228	-0.342772	-0.180495	-0.118416	0.478713	-0.104752	-0.0857426	-0.46099	0.0788119	0.0923762	0.122574	0.19396	0.378515	0.233168	-0.272871	0.20297	-0.511386	-0.168614	-0.553564	-0.0133663	0.189802	-0.0812871
-0.158317	-0.422277	-0.862574	-0.100495	0.415149	0.175644	-0.0969307	-0.423465	0.602079	-0.316733	0.344554	0.36	0.114752	0.0864356	0.24297	-0.431584	-0.187624	-0.237129	0.535049	-0.00059406	-0.148218	-0.168911	0.0395049	-0.0520792	0.119505	0.187525	0.381683	0.299901	-0.278416	0.270792	-0.584554	-0.355842	-0.710099	-0.0325743	0.129802	-0.0605941
0.212673	-0.56901	-0.93099	-0.219901	0.296238	0.0163366	-0.0333663	-0.17901	0.689604	-0.377921	-0.0530693	0.338911	-0.161782	-0.161386	0.436634	-0.419505	-0.323861	-0.302772	0.511386	-0.0485148	0.160495	-0.288713	-9.901e-05	0.133465	-0.0733663	0.0770297	0.264851	0.246139	-0.243366	0.358911	-0.519604	-0.0111881	-0.426634	-0.151089	0.189802	-0.290891
0.0158416	-0.517624	-0.876139	-0.0320792	0.496436	-0.0136634	0.050495	-0.375842	0.599307	-0.288614	0.203762	0.22495	-0.0110891	0.0019802	0.440693	-0.281782	-0.359505	-0.202475	0.690297	-0.0655445	0.0674257	-0.339109	-0.32099	0.137129	-0.0768317	0.128713	0.240495	0.252376	-0.0970297	0.446139	-0.494257	0.0231683	-0.0131683	-0.0111881	0.352277	-0.271386
-0.0850495	-1.00554	-0.920099	-0.160297	0.318812	-0.0446535	0.104059	-0.280792	0.718713	-0.290099	-0.126931	0.523564	0.0907921	0.0638614	0.633762	-0.42099	-0.424752	-0.203168	0.618812	-0.0489109	0.122772	-0.431386	-0.185842	0.112079	-0.0832673	0.09	0.302079	0.227921	-0.223168	0.414356	-0.658317	0.127525	0.520198	0.174951	0.195644	-0.252178
-0.165248	-0.816535	-1.02594	-0.00118812	0.387426	-0.0740594	-0.12396	-0.197921	0.997426	-0.321287	-0.118812	0.471485	-0.0380198	0.0672277	0.227426	-0.190198	-0.398416	-0.0540594	0.538614	0.00683168	-0.0618812	-0.49703	-0.0357426	0.0870297	-0.178812	0.138911	0.395842	0.172871	-0.136832	0.563465	-0.41297	-0.186337	0.370495	-0.0970297	0.390297	-0.0163366
-0.0441584	-0.869109	-1.01485	-0.102673	0.308812	-0.0124753	9.901e-05	-0.0734653	0.716436	-0.293168	-0.29802	0.487921	0.214554	0.264257	0.108416	-0.250891	-0.432178	-0.114059	0.624455	-0.168416	0.114059	-0.433564	-0.0165347	0.123861	0.0640594	0.158119	0.307723	0.269703	0.198218	0.471287	-0.29604	-0.111386	0.52297	-0.239901	0.274059	-0.0924752
-0.112178	-0.923861	-1.03941	-0.0639604	0.479307	-0.108416	0.181782	-0.361188	0.712178	-0.292178	-0.259901	0.566832	0.0961386	0.179505	-0.266337	-0.329208	-0.494356	-0.0528713	0.641188	-0.0657426	-0.169307	-0.400396	-0.0561386	0.0415842	0.145644	0.0869307	-0.00128713	0.275248	-0.14802	0.309208	-0.0834653	-0.207327	0.429901	-0.171584	0.338119	-0.175149
0.129208	-0.831386	-0.997228	-0.0327723	0.36198	-0.0372277	0.0440594	-0.306436	0.740099	-0.262178	-0.500396	0.675842	0.0970297	0.214851	-0.508911	-0.249307	-0.930198	-0.142871	0.378812	-0.230891	-0.234257	-0.557624	0.122673	0.137426	-0.170297	0.165842	0.187129	0.281485	-0.0913861	0.360594	-0.0211881	-0.352673	0.0892079	-0.0740594	-0.00722772	-0.131188
-0.0070297	-1.04861	-1.05851	0.0869307	0.372178	0.0230693	0.198515	-0.314455	0.703663	-0.262475	-0.682376	0.897624	0.126436	0.248614	-0.191188	-0.118515	-0.712673	-0.0237624	0.426139	0.0670297	-0.178614	-0.274158	0.0427723	0.0236634	-0.0864356	0.123762	0.190495	0.16703	0.153267	0.44099	0.0323762	-0.315545	-0.349307	-0.347228	0.125545	-0.205347
-0.0144554	-1.16495	-0.965347	0.0278218	0.130792	-0.223564	0.0951485	-0.291584	0.72901	-0.262475	-0.673663	0.655347	-0.0651485	0.0650495	-0.0234653	-0.164653	-0.74802	-0.178317	0.282871	-0.166931	-0.0542574	-0.37099	0.16198	-9.901e-05	0.0976238	0.203564	0.310198	-0.0483168	0.14802	0.151683	0.0271287	-0.219406	-0.453267	0.0710891	0.099901	-0.101089
0.00782178	-1.01307	-1.19347	0.09	0.0479208	-0.0606931	0.161089	-0.266832	0.572178	-0.26396	-0.625842	0.811584	0.0957426	-0.089703	0.0439604	-0.0928713	-0.780792	-0.152673	0.429505	-0.269901	-0.249802	-0.371584	0.0193069	0.0361386	-0.159505	0.352079	0.149901	0.135941	0.116139	0.171188	0.0521782	-0.371089	-0.383267	-0.32901	0.104554	-0.327426
0.0585149	-0.972772	-1.13347	-0.253663	0.147525	-0.0289109	0.0861386	-0.523663	0.653168	-0.16297	-0.778416	0.973465	-0.0645545	0.0181188	0.148218	-0.200198	-0.811782	-0.0676238	0.256238	-0.00069307	-0.165644	-0.691584	0.0381188	0.101089	-0.132277	0.0812871	0.341782	-0.170891	0.214257	-0.148713	0.0172277	-0.262772	-0.354554	-0.0394059	-0.0826733	-0.223762
-0.0986139	-1.01772	-1.17347	-0.355842	0.217129	-0.0948515	0.239901	-0.527723	0.645149	-0.163267	-0.738812	1.09109	0.0660396	-0.00267327	0.367525	-0.248713	-0.595545	-0.160396	0.143861	-0.0730693	-0.139703	-0.574653	0.0251485	-0.0805941	-0.199406	0.137723	0.127327	-0.00752475	0.212376	-0.160792	0.0695049	-0.25604	0.294851	-0.119802	-0.0192079	-0.434158
-0.0741584	-0.919307	-1.11525	-0.286535	0.168218	-0.120792	0.175248	-0.345446	0.544951	-0.350495	-0.851386	0.929901	-0.0329703	-0.0671287	0.563366	-0.300396	-0.656832	-0.164752	0.257822	0.00336634	-0.105842	-0.455248	-0.13604	0.115347	-0.177129	0.112475	0.231089	-0.0341584	0.209307	0.197426	0.121485	-0.245248	0.205446	-0.270198	-0.240099	-0.425545
-0.079703	-0.953663	-1.37832	-0.228713	0.234653	-0.117129	-0.0188119	-0.451584	0.597228	-0.290792	-0.974554	0.854653	0.0673267	-0.0912871	0.229505	-0.201485	-0.597228	-0.228416	0.363564	-0.319604	-0.150198	-0.48396	-0.215941	0.152178	-0.374257	0.169208	-0.0164356	0.0580198	-0.0725743	0.215941	-0.00376238	-0.207228	0.704257	-0.292772	-0.197327	-0.224752
-0.113762	-1.02861	-1.39297	-0.360495	0.241782	-0.0834653	-0.112475	-0.358416	0.650693	-0.100099	-0.746139	1.09634	-0.0295049	0.164554	-0.14396	-0.40099	-0.596634	-0.231584	0.189703	-0.299802	-0.184851	-0.556733	0.152574	0.0693069	-0.281782	0.188317	0.166733	0.00049505	0.135248	0.296139	-0.0391089	0.0786139	0.513663	-0.402871	-0.0741584	-0.274554
-0.275644	-1.06634	-1.30782	-0.260495	0.191683	-0.198515	0.191881	-0.425545	0.480495	-0.321683	-0.738416	1.17436	0.0723762	-0.0770297	-0.420495	-0.553564	-0.716634	-0.265941	0.304554	-0.339109	-0.280396	-0.380099	0.0510891	0.225149	-0.229505	0.0774257	-0.049901	0.00148515	0.294059	0.168515	0.0462376	-0.19495	0.452475	-0.582079	0.0604951	-0.454059
0.221881	-0.942475	-1.60525	-0.362376	-0.0190099	-0.253861	0.159109	-0.560198	0.41099	-0.133267	-0.728218	1.05861	-0.0260396	0.15099	-0.355545	-0.574356	-0.746634	-0.270792	0.0691089	-0.41396	-0.195347	-0.135644	0.0715842	0.271386	-0.0750495	0.182871	0.0244555	0.0354455	-0.207228	0.0292079	-0.151881	-0.438713	0.0827723	-0.452475	-0.0617822	-0.196337
0.0688119	-0.981683	-1.71663	-0.294158	0.301485	-0.349505	0.277921	-0.475842	0.431386	-0.0445545	-0.659307	0.972178	0.0445545	0.039703	-0.500594	-0.563564	-0.848218	-0.27505	0.204257	-0.468812	-0.451485	-0.213366	0.0622772	0.119406	-0.331287	0.139901	0.00029703	-0.0226733	0.202475	0.331188	0.00029703	-0.153069	-0.0491089	-0.535644	0.0363366	-0.40703
0.0669307	-1.18277	-1.70198	-0.268713	0.0009901	-0.181782	0.305049	-0.483564	0.142079	-0.105446	-0.62099	1.04426	0.102079	0.198416	-0.184356	-0.555842	-0.875446	-0.320297	0.16099	-0.320891	-0.388317	-0.222277	-0.0491089	0.155545	-0.186535	-0.124554	0.345248	0.158812	-0.0814852	0.201881	0.0841584	-0.305644	-0.392871	-0.554752	-0.0446535	-0.277822
-0.0630693	-0.816436	-1.84396	-0.216139	-0.0527723	-0.298317	0.212277	-0.329802	0.161188	-0.0150495	-0.792871	0.554554	-0.0579208	-0.0104951	-0.0508911	-0.391881	-0.862673	-0.165545	0.0464356	-0.304851	-0.495446	-0.0520792	-0.059604	0.164158	-0.192673	0.0487129	0.160198	-0.0475247	0.197228	0.00564356	0.0170297	-0.228812	-0.553168	-0.609208	-0.0925743	0.0820792
-0.181188	-0.800099	-1.89594	-0.252079	-0.106535	-0.233069	0.210792	-0.204752	0.00316832	0.0858416	-0.85703	0.316931	-0.0579208	-0.090297	-0.0456436	-0.607525	-1.05089	-0.199505	0.159406	-0.626931	-0.313168	-0.150099	-0.0995049	0.259406	0.0205941	0.123564	-0.0260396	0.0155446	0.0965346	0.179109	0.0371287	0.0889109	-0.333168	-0.512475	0.11099	0.089802
0.0309901	-0.888119	-1.97921	-0.509208	-0.0963366	-0.0484158	-0.0110891	-0.0884158	0.114455	0.116139	-0.688713	0.257723	-0.146931	0.170891	0.417129	-0.353465	-1.07851	-0.295941	0.172673	-0.51901	-0.350297	-0.26297	0.363366	0.235545	-0.0143564	0.257525	0.0777228	-0.0107921	0.0662376	0.173267	-0.0664356	-0.0927723	-0.0537624	-0.446634	-0.0644554	0.218812
-0.178119	-0.865446	-2.06149	-0.428119	-0.0292079	-0.00287129	0.11703	0.0981188	-0.0863366	-0.203267	-0.65099	0.0166337	-0.209109	0.0247525	0.331782	-0.438218	-0.986634	-0.0911881	0.188416	-0.398911	-0.547129	0.0312871	0.0165347	0.090198	-0.179901	0.123861	0.200792	0.0513861	-0.0243564	0.164851	-0.0782178	0.0152475	0.352772	-0.470792	-0.0207921	0.226535
-0.115049	-0.983366	-1.92416	-0.246139	-0.150198	0.0620792	0.206436	0.0931683	-0.155842	-0.0426733	-0.61198	-0.0049505	0.00148515	0.256238	0.214851	-0.434257	-1.10386	-0.308218	0.232673	-0.438218	-0.493366	-0.0247525	-0.0927723	0.216436	-0.0845545	0.00940594	0.171386	0.174455	-0.0565346	0.125644	-0.0317822	0.117327	0.559406	-0.55396	-0.0374257	0.0438614
-0.0522772	-1.00188	-2.10178	-0.345446	-0.144257	-0.0323762	0.0767327	0.118515	-0.00455446	-0.162277	-0.602376	-0.24901	-0.0869307	0.269505	0.0585149	-0.521188	-0.853861	-0.253762	0.184158	-0.419406	-0.531089	0.17703	-0.128317	0.22198	-0.219802	0.0542574	0.0835644	0.0566337	-0.217822	-0.0136634	-0.0459406	-0.0624753	0.556931	-0.0762376	-0.123465	0.208812
-0.168614	-1.02257	-2.1603	-0.351881	-0.0665347	0.0422772	0.116733	0.143267	-0.11297	-0.0722772	-0.657723	-0.819901	-0.177525	0.354059	-0.437723	-0.609109	-0.913861	-0.317525	0.126535	-0.557129	-0.597921	0.215149	-0.0641584	0.136832	-0.0963366	0.108416	0.0838614	-0.0614852	-0.380891	0.358614	-0.0916832	0.357129	0.466931	-0.256931	0.141386	0.306238
-0.0426733	-1.10515	-2.0603	-0.432079	-0.249109	-0.0543564	0.237327	0.199208	-0.0506931	0.177723	-0.490297	-0.824851	-0.208218	0.486436	-0.433069	-0.514752	-0.780495	-0.291188	-0.0786139	-0.565149	-0.517228	0.309208	-0.138812	0.174554	-0.0121782	0.0235644	0.177327	-0.029901	-0.411485	0.384059	0.0222772	0.0561386	0.155149	-0.407921	0.28505	0.256139
-0.0362376	-1.0705	-2.15158	-0.308614	-0.331683	-0.297228	0.269208	0.194257	-0.19	0.149901	-0.583465	-0.962871	-0.0288119	0.189703	-0.425941	-0.604455	-0.587426	-0.207327	0.00287129	-0.502277	-0.675248	0.179901	0.0768317	0.179208	-0.0162376	0.23	0.177327	-0.218911	-0.594851	0.192178	0.0983168	0.0920792	0.0226733	0.0409901	-0.00940594	0.395644
-0.252475	-1.06832	-2.45386	-0.476337	-0.11396	-0.440396	0.428317	0.288317	-0.201089	0.331782	-0.76	-0.974851	0.00524752	0.41901	-0.331287	-0.572277	-0.71901	-0.0210891	-0.0875247	-0.578812	-0.534554	0.355842	-0.207129	0.12505	-0.109901	0.182673	0.119802	-0.186733	-0.388911	0.336337	0.143465	-0.117129	-0.0982178	-0.454752	0.00514851	0.152475
-0.249703	-0.878911	-2.32822	-0.511881	-0.22495	-0.185149	0.207129	0.283267	-0.18	0.302079	-0.666634	-1.31089	0.0465346	0.210198	-0.00445545	-0.62703	-0.436832	-0.213267	0.0245545	-0.452871	-0.60297	0.353069	0.0394059	0.101584	-0.301485	0.167228	-0.0980198	-0.216337	-0.482079	0.268317	-0.0222772	0.0552475	-0.0737624	-0.228515	0.0463366	0.341188
-0.24198	-0.880396	-2.52545	0.0143564	-0.24505	-0.309901	0.265248	0.248911	-0.120495	0.372475	-0.91099	-1.5198	-0.271683	0.442871	0.120495	-0.461683	-0.465941	-0.247525	-0.242178	-0.616238	-0.743861	0.409604	0.0650495	0.0655445	-0.116436	0.0835644	-0.0967327	-0.183861	-0.262772	0.41396	-0.198317	0.0951485	-0.0793069	-0.252079	-0.0994059	0.25802
-0.138218	-1.1397	-2.46634	-0.210297	-0.297921	-0.234951	0.0737624	0.303366	-0.130693	0.154059	-0.846733	-1.50594	-0.242376	0.26495	0.314554	-0.67802	-0.33505	-0.191881	-0.360792	-0.589604	-0.783762	0.431881	0.0924752	0.138317	-0.399208	0.346931	-0.125248	-0.181683	-0.425149	0.438713	-0.0956436	0.22198	-0.0223762	-0.375545	-0.207624	0.264257
-0.263861	-0.900198	-2.50723	-0.0874257	-0.16802	-0.198218	0.115347	0.390594	-0.332772	0.404356	-0.84	-1.68634	-0.171089	0.405149	0.190792	-0.512673	-0.0113861	-0.196238	-0.411485	-0.622475	-0.632475	0.544455	-0.131584	0.174752	-0.253861	-0.0109901	-0.312178	-0.300693	-0.398812	0.493168	-0.292376	0.260594	0.505842	-0.206931	-0.266832	0.40198
-0.040396	-0.719406	-2.38881	-0.314851	-0.160594	-0.163861	0.205049	0.579307	-0.342673	0.306238	-0.58505	-1.84079	-0.199208	0.157822	0.166634	-0.877723	0.0535644	-0.0433663	-0.314951	-0.744356	-0.510495	0.384851	-0.0943564	0.117822	-0.25604	0.123267	-0.181881	-0.179505	-0.215347	0.676337	-0.31099	0.394653	0.695545	-0.166733	-0.0672277	0.309406
-0.192376	-0.724257	-2.58069	-0.100099	-0.182772	0.0207921	0.234059	0.575842	-0.261683	0.246238	-0.801287	-1.98743	-0.240099	0.426535	-0.107822	-0.723366	-0.252475	-0.212277	-0.393861	-0.558119	-0.619109	0.552178	0.0521782	0.272376	-0.260693	0.0162376	-0.154059	-0.300396	-0.281881	0.32802	-0.48703	0.242772	0.884356	-0.21802	0.0439604	0.374356
-0.14396	-0.681287	-2.43287	-0.192277	-0.144752	-0.287327	0.141881	0.382772	-0.237228	0.33901	-0.637624	-1.98931	-0.269703	0.366436	-0.261287	-0.805644	-0.0563366	-0.11604	-0.384554	-0.601485	-0.600594	0.509802	-0.0105941	0.0873267	-0.0450495	0.147624	-0.43099	-0.27099	-0.167822	0.467822	-0.313762	-0.00316832	0.753663	-0.24	0.0150495	0.418614
0.0421782	-0.819307	-2.46653	-0.104752	-0.0180198	-0.0651485	0.389802	0.408119	-0.394653	0.311188	-0.634554	-2.24515	-0.269109	0.480099	-0.408218	-0.918218	-0.184851	-0.285347	-0.152772	-0.441188	-0.508911	0.585941	0.0162376	0.0888119	-0.049703	0.039703	-0.119505	-0.211287	-0.264257	0.397624	-0.212079	0.31396	0.321287	0.0430693	0.124951	0.386337
0.0183168	-0.866931	-2.45208	-0.108119	-0.251188	-0.00326733	0.106634	0.285347	-0.398416	0.253069	-0.602673	-2.19198	-0.171287	0.356634	-0.50604	-0.883267	0.0385149	-0.203366	-0.552277	-0.716535	-0.336931	0.599505	0.0777228	0.134059	0.0475247	0.0520792	-0.118317	-0.150693	-0.270099	0.508614	-0.159703	0.110396	0.0678218	-0.449208	0.0745545	0.243762
0.115446	-0.76802	-2.58663	-0.239307	-0.122475	-0.060396	0.163168	0.370693	-0.441188	0.38396	-0.660198	-2.41871	-0.0816832	0.206238	-0.531683	-0.819901	0.140891	-0.179901	-0.322673	-0.556535	-0.155545	0.673366	-0.0134653	0.0359406	0.0131683	0.15505	-0.177129	-0.461386	-0.145049	0.59	-0.217327	0.146832	-0.374653	-0.255545	0.173564	0.251188
-0.190198	-0.880594	-2.56248	0.00980198	-0.0509901	-0.0269307	0.281584	0.428218	-0.653663	0.444951	-0.376535	-2.22208	-0.173861	0.185149	-0.218218	-0.87495	0.0427723	-0.0839604	-0.433465	-0.378713	-0.255446	0.715743	0.0156436	-0.0815842	0.0694059	0.110198	-0.116535	-0.303564	-0.122574	0.271584	-0.166733	0.332475	-0.256535	-0.223069	0.0518812	0.198317
0.0947525	-0.993168	-2.69891	-0.171782	-0.101089	0.0383168	0.157822	0.393564	-0.565743	0.474653	-0.562475	-2.48901	-0.334752	-0.0240594	0.0779208	-0.771584	-0.0450495	-0.0592079	-0.645347	-0.530297	-0.236634	0.541188	0.205941	-0.179109	0.0966337	-0.00554455	-0.175049	-0.404554	-0.128812	0.101386	-0.216238	0.245248	-0.16	-0.130891	0.0593069	0.0747525
0.200693	-0.987624	-2.61604	-0.17396	-0.281782	-0.079505	0.155347	0.332574	-0.686634	0.344653	-0.62099	-2.4101	-0.458119	0.20703	0.332277	-0.618812	-0.135446	-0.0960396	-0.798317	-0.440891	-0.126238	0.613267	-0.51901	-0.134554	0.00257426	-0.0234653	-0.305347	-0.376436	-0.0443564	0.0930693	-0.234158	0.473267	0.0246535	-0.160594	0.00732673	-0.0715842
0.326238	-0.952376	-2.81248	-0.0836634	-0.270891	-0.0473267	-0.00712871	0.298812	-0.539406	0.136832	-0.467624	-2.40455	-0.211584	-0.0646535	0.48604	-0.51198	0.0257426	-0.0394059	-0.62901	-0.411188	-0.254554	0.715743	-0.0542574	-0.100297	0.0882178	0.121089	-0.395644	-0.467327	-0.167426	-0.0049505	-0.442376	0.350099	0.452772	-0.159307	0.329406	0.112376
0.142475	-1.01327	-2.83198	-0.114257	-0.102277	-0.0463366	0.0518812	0.415446	-0.480297	0.110198	-0.118515	-2.3102	-0.184356	0.136139	0.372574	-0.316337	0.113267	0.238416	-0.72	-0.411188	-0.352277	0.603465	0.0626733	-0.127228	0.144158	-0.0852475	-0.204752	-0.379208	-0.362673	-0.173564	-0.120594	0.32604	0.831782	-0.0943564	0.0583168	0.145446
0.367426	-1.25426	-2.88426	-0.0229703	-0.0636634	0.0143564	0.148713	0.262277	-0.687228	0.14396	-0.089703	-2.39901	-0.156535	0.206634	-0.0340594	-0.370396	0.179505	0.116832	-0.83505	0.0585149	-0.211782	0.540594	0.0311881	-0.0647525	-0.0516832	-0.0712871	-0.303861	-0.31099	-0.216436	0.185941	-0.354554	0.300297	0.665644	0.0678218	0.137327	0.0291089
0.41396	-1.13584	-2.89752	-0.0839604	-0.214653	0.146535	0.0153465	0.291386	-0.567228	0.148911	-0.0918812	-2.14535	-0.0665347	0.186535	0.0724753	-0.33396	0.0460396	0.0443564	-0.768515	-0.00485149	-0.130198	0.637723	-0.09	-0.16297	-0.0154455	0.194158	-0.334455	-0.221881	-0.0574257	-0.0467327	-0.147624	-0.0009901	0.50099	-0.0627723	0.176634	-0.0265346
0.377723	-1.0399	-3.07178	0.00544554	-0.204059	0.0489109	0.0132673	0.377129	-0.657525	-0.0658416	-0.184653	-2.2704	-0.0974257	0.0764356	-0.182277	-0.0753465	-0.0483168	0.234356	-0.791683	0.30198	-0.26099	0.556436	-0.191188	-0.120792	0.0720792	-0.10099	-0.338416	-0.251584	-0.0620792	-0.281881	-0.0988119	0.0661386	0.258515	0.258119	-0.135644	0.00554455
0.544851	-1.23426	-3.09812	0.0751485	-0.00475248	0.120792	0.141386	0.28495	-0.658812	0.158812	0.150099	-2.23545	-0.099604	0.235743	-0.240099	-0.187228	-0.0563366	-0.0165347	-0.636337	0.429208	-0.181485	0.786931	-0.0604951	-0.0590099	0.0352475	-0.059505	-0.400495	-0.283465	0.155446	-0.200198	-0.0414851	-0.0482178	-0.0339604	-0.0891089	0.0604951	0.00980198
0.46099	-1.17208	-3.17604	0.135743	-0.274554	-0.00792079	0.0413861	0.313366	-0.229109	0.193465	0.233564	-2.0705	0.0891089	0.307228	-0.29297	-0.27703	0.0993069	-0.0475247	-0.560396	0.459505	-0.121386	0.696931	0.0885149	-0.157426	0.122673	-0.115842	-0.180792	-0.254653	0.0547525	-0.00722772	-0.123267	-0.0422772	-0.349208	0.442079	0.257921	0.0422772
0.437129	-1.1198	-3.11485	0.285743	-0.0487129	0.0920792	0.139505	0.252475	-0.288812	0.287822	0.26703	-2.0996	-0.264653	0.164653	-0.124653	-0.0771287	0.254653	0.0409901	-0.307921	0.515743	-0.129406	0.795347	0.220396	-0.186436	0.250792	0.216832	-0.179604	-0.137723	-0.00653465	0.132376	-0.134059	-0.136733	-0.221683	0.166436	0.0144554	-0.173465
0.44297	-1.14733	-3.19683	-0.0858416	-0.423069	0.0533663	0.108317	0.251188	-0.229406	0.202475	0.293366	-1.75782	-0.0168317	0.171683	0.131188	-0.346931	-0.030297	0.140396	-0.434455	0.602376	-0.140495	0.551881	0.189406	-0.11396	0.115149	-0.0482178	-0.210594	-0.229307	-0.128416	-0.0477228	0.0460396	0.0566337	-0.41505	0.0192079	0.11	-0.0424752
0.38099	-1.03535	-3.09782	0.00049505	-0.444356	-0.00534653	-0.143267	0.307426	-0.130594	0.238416	0.537822	-1.91406	-0.0808911	0.0494059	0.255842	-0.270099	0.0556436	0.139109	-0.402277	0.570198	0.030198	0.526535	0.159406	-0.111485	0.049802	-0.0380198	-0.179406	-0.393069	0.0228713	0.149406	0.0645545	0.34099	-0.418119	-0.0171287	0.0543564	-0.171881
0.487228	-1.04465	-2.91129	0.0967327	-0.156337	-0.0350495	0.0770297	0.334653	-0.411485	0.185248	0.753168	-1.97218	-0.202079	-0.0009901	0.389802	-0.142079	0.152277	0.257921	-0.490792	0.785545	-0.157921	0.372079	-0.0009901	-0.0508911	0.103861	0.00405941	-0.31099	-0.235842	0.0244555	0.304356	-0.0634654	0.22505	0.0824752	-0.0115842	0.0286139	-0.363762
0.246535	-1.01545	-3.03446	-0.0363366	-0.268614	0.18396	-0.0838614	0.24099	-0.510792	0.219901	0.77703	-2.06436	-0.235545	0.135149	0.424752	-0.0661386	0.236733	0.13604	-0.549505	0.88396	-0.0777228	0.478911	0.246535	-0.107228	-0.181089	-0.0564356	-0.181881	-0.179802	0.0544555	0.192376	-0.261188	0.409109	0.419109	0.310198	0.0335644	-0.234653
0.433069	-1.21752	-3.0895	0.0917822	-0.291188	0.0939604	0.0755446	0.267822	-0.539505	0.0345545	0.668713	-2.34743	0.0132673	0.170099	-0.102178	-0.16	0.0136634	0.0651485	-0.397327	0.909901	-0.175842	0.444554	0.113069	0.0464356	-0.0989109	0.175049	-0.216535	-0.181683	0.0507921	0.290099	0.0407921	0.132178	0.199406	0.0635644	0.127921	0.0169307
0.320198	-1.04218	-3.15584	0.14802	-0.312277	0.0545545	-0.0575247	0.205347	-0.686436	0.171683	0.692574	-1.9199	-0.120198	0.238416	-0.203168	-0.245941	0.170198	0.195149	-0.39802	0.966832	-0.28604	0.481386	0.113366	-0.0107921	-0.164455	0.0971287	-0.158416	-0.213564	-0.128911	0.328416	-0.280297	0.266832	0.0159406	0.216733	0.102277	-0.0120792
0.325446	-0.957426	-3.03208	0.116535	-0.246139	-0.126337	-0.0565346	0.102277	-0.725545	0.204455	0.62604	-2.10356	-0.243564	0.33396	-0.26198	-0.333168	-0.0544555	0.194554	-0.357327	0.739109	-0.236238	0.306337	0.0549505	-0.0962376	-0.0682178	0.139208	-0.162475	-0.216337	0.124455	0.376139	-0.22901	-0.0115842	-0.207129	0.125149	0.330396	0.0454455
0.235941	-1.11861	-3.00426	0.0843564	-0.14901	-0.04	0.0019802	0.0979208	-0.724951	0.139109	0.780495	-1.86099	-0.215446	0.251683	-0.448614	-0.238218	-0.116634	0.282475	-0.178218	0.982673	-0.245545	0.214653	0.153168	-0.0327723	-0.112178	0.0612871	-0.267129	-0.128515	0.213861	0.090099	0.0392079	0.0481188	-0.373564	0.156337	0.245941	-0.175149
0.597129	-1.07158	-2.8595	0.111881	-0.449802	0.175941	-0.119307	0.255347	-0.534356	0.0859406	0.775248	-1.6903	-0.0972277	0.170396	-0.0642574	-0.105743	0.0374257	0.190396	-0.359505	0.88703	0.183267	0.412376	0.0225743	-0.03	-0.0483168	0.0039604	-0.271089	-0.25099	0.187624	-0.114356	-0.0915842	0.0549505	-0.535446	0.284752	0.313366	-0.207921
0.606733	-1.14644	-2.93446	0.168515	-0.193663	0.114752	-0.0281188	0.161584	-0.534653	0.469406	0.418119	-1.42059	0.00059406	0.0508911	0.0606931	-0.0735644	-0.21604	0.308218	-0.299505	0.912079	0.112772	0.319505	0.209406	0.00247525	-0.123267	-0.0167327	-0.300792	-0.313168	0.188614	0.0118812	-0.161188	0.059802	-0.820396	0.150396	0.129505	-0.177921
0.522871	-1.21752	-3.00277	0.166337	-0.248119	0.231683	-0.247525	0.0612871	-0.474653	0.40495	0.481386	-1.27386	-0.294059	0.0307921	0.165347	-0.12802	-0.0615842	0.157624	-0.271386	1.02743	-0.0193069	0.297525	0.148119	-0.0241584	-0.0876238	0.183168	-0.273267	-0.194356	0.219901	-0.0146535	-0.198911	0.0932673	-0.826931	0.117921	0.106931	-0.295149
0.336337	-1.12683	-2.77079	0.295743	-0.120396	0.258614	-0.246238	0.192574	-0.376436	0.231188	0.564554	-1.15594	-0.0468317	-0.182376	0.287525	0.0937624	-0.189604	0.245446	-0.241683	1.01812	0.0604951	0.304059	0.430297	-0.0189109	-0.060396	0.00366337	-0.307921	-0.196832	0.220495	-0.0394059	-0.119109	0.127327	-0.613465	0.209802	-0.0440594	-0.203267
0.562772	-1.32832	-2.90129	0.0410891	-0.11604	0.328911	-0.246238	0.0640594	-0.508911	0.169307	0.36802	-1.26653	0.0773267	0.0791089	0.422079	0.0383168	-0.168614	0.374257	-0.304158	0.64	0.169406	0.30901	0.406139	-0.0158416	0.116535	0.117525	-0.150396	-0.169901	0.224158	0.0827723	-0.187426	0.190396	-0.269604	0.340396	0.0336634	-0.141089
0.465644	-1.40069	-2.85485	0.0964356	0.019901	0.108911	-0.0855445	0.0959406	-0.383861	0.174554	0.392178	-1.20802	0.0133663	0.059604	0.205149	0.0141584	-0.0573267	0.243564	-0.305644	0.825941	0.25703	0.438911	0.156436	-0.113663	0.0827723	0.029604	-0.278911	-0.172673	0.225446	-0.0350495	-0.295446	0.0732673	-0.0232673	0.427921	-0.208911	0.141089
0.469406	-1.37495	-2.4703	0.24396	-0.00673267	0.139901	-0.17396	0.0387129	-0.419802	0.121386	0.177525	-0.942574	-0.0592079	-0.049901	0.329505	-0.00910891	-0.0557426	0.0910891	-0.186832	0.818812	0.0536634	0.477525	0.276733	-0.11	0.24	-0.0193069	-0.0913861	-0.144851	0.324257	-0.0656436	-0.331683	-0.111485	0.120198	0.427327	-0.0493069	0.268614
0.473762	-1.32703	-2.20941	0.278713	0.0575247	0.168317	0.00534653	0.201485	-0.274752	-0.0629703	0.380693	-1.34079	0.0377228	0.142475	-0.164257	-0.0929703	-0.0616832	0.119901	-0.279307	0.901386	0.100693	0.325644	0.0873267	-0.227525	0.175644	0.121485	-0.0932673	-0.0495049	0.414851	-0.168119	-0.148812	-0.0511881	0.275545	0.401683	-0.0737624	0.0467327
0.505941	-1.48822	-1.96168	0.114752	-0.069703	0.0768317	-0.0855445	0.173663	-0.469406	0.105347	0.444554	-1.02277	0.0612871	0.213366	-0.381485	0.00415842	0.0226733	0.115049	-0.311485	0.672079	0.188911	0.435941	0.249208	-0.0647525	0.143465	0.0632673	0.0945545	-0.18505	0.222376	0.272871	-0.155347	0.0262376	-0.0394059	0.524752	0.0648515	0.165743
0.357822	-1.56307	-1.79455	0.298812	0.0615842	0.136535	-0.115545	0.295743	-0.255248	0.147129	0.219307	-0.858119	0.14604	0.193564	-0.467129	-0.0805941	-0.261683	0.0416832	-0.314653	0.504257	0.0768317	0.0943564	0.220396	-0.130099	0.0431683	0.172574	-0.187327	-0.0893069	0.317426	0.242871	-0.010198	-0.188416	-0.546535	0.375347	0.0741584	0.134455
0.45	-1.60644	-1.45119	0.135446	0.254752	0.0737624	-0.246139	0.0482178	-0.0711881	0.286139	0.273762	-0.727525	0.242574	0.0518812	-0.402178	-0.134752	-0.134752	0.290792	-0.418614	0.598119	0.164455	0.160891	0.253465	-0.126436	0.172178	-0.00564356	0.030198	-0.0661386	0.372475	0.271683	-0.0738614	0.0643564	-0.591782	0.127228	-0.0508911	0.195149
0.421485	-1.46099	-1.39297	0.070198	0.219703	-0.00049505	-0.334257	-0.040495	0.116337	0.447822	0.388218	-0.761485	0.0188119	0.153663	-0.206337	-0.0995049	-0.329109	0.198614	-0.322079	0.400594	0.24297	0.328614	0.224059	-0.0936634	0.100297	0.00643564	-0.103564	-0.102277	0.37	0.208614	-0.107228	-0.122574	-0.875149	0.406337	-0.0446535	0.10297
0.553663	-1.53218	-1.39198	0.407129	0.0737624	0.0680198	-0.24396	0.0807921	0.113564	0.178911	0.35297	-0.799901	0.0770297	-0.0258416	0.181782	-0.214851	-0.388911	0.256139	-0.423564	0.394356	0.233663	0.146634	0.168119	-0.152376	0.00752475	0.0489109	-0.0488119	0.102178	0.304752	-0.0147525	-0.203069	-0.149109	-0.80703	0.0960396	-0.00782178	0.103861
0.337624	-1.32119	-1.58356	0.285842	-0.0540594	-0.00415842	-0.142772	-0.0392079	0.080198	0.321584	0.285842	-0.501089	0.0132673	-0.193168	0.304851	0.164158	-0.138713	0.164554	-0.328515	0.385941	0.100594	0.153168	0.262475	-0.178713	0.196931	0.119406	-0.204059	-0.113663	0.113861	-0.0182178	-0.209901	0.0455446	-0.628614	0.157327	0.0268317	0.263267
0.302574	-1.36267	-1.56792	0.28396	0.0491089	-0.0378218	-0.203762	0.112079	0.229901	0.172475	0.33901	-0.637525	-0.150495	0.0670297	0.560495	0.0181188	-0.286238	0.0711881	-0.182871	0.438416	0.296931	0.029703	0.266832	-0.0846535	0.0932673	0.203366	-0.0905941	-0.0604951	0.23198	-0.0809901	-0.0955446	0.10802	-0.311386	0.185446	0.0320792	0.262376
0.276535	-1.37168	-1.60139	0.342772	0.273762	0.0612871	-0.334356	0.113267	0.227129	0.346436	0.433762	-0.686139	-0.0244555	-0.050198	0.531683	-0.0960396	-0.34099	0.15901	-0.147822	0.461287	0.134851	-0.271089	0.10901	-0.110297	0.164158	0.142376	-0.0277228	-0.0369307	0.198812	-0.0238614	-0.439505	0.332376	0.11703	0.314554	-0.0226733	0.0733663
0.353366	-1.52762	-1.60792	0.42901	0.278416	-0.160495	-0.273762	0.0866337	0.164059	0.290297	0.270693	-0.34	-0.159703	0.118119	0.313168	0.154257	-0.276634	0.0665347	-0.193069	0.234455	0.184356	-0.144851	0.210891	-0.108119	0.133168	-0.0268317	-0.104554	-0.0130693	0.0782178	-0.155446	-0.505941	0.276139	0.0551485	0.0667327	0.0431683	0.0445545
0.106436	-1.34347	-1.71782	0.338119	0.151485	-0.100198	-0.172871	0.0606931	0.441881	0.404158	0.117624	-0.516931	0.0237624	0.0293069	0.0968317	0.158515	-0.303267	0.182178	-0.0692079	0.0473267	0.172574	-0.166139	0.21396	-0.00386139	0.252178	0.0130693	-0.201683	0.040198	-0.0214852	-0.382475	-0.332772	0.119505	0.0829703	0.0964356	-0.0369307	0.10604
0.039604	-1.50683	-1.75713	0.247525	0.215842	-0.0136634	-0.392574	-0.0278218	0.219703	0.387426	0.113564	-0.35505	0.0775248	0.14198	-0.208614	0.070396	-0.300792	0.268218	-0.102574	0.513267	0.0710891	-0.160198	0.14703	-0.100792	0.0627723	0.174158	-0.150297	-0.117822	0.109109	-0.347723	-0.297129	0.182871	-0.0983168	-0.0941584	0.191683	0.107921
0.233267	-1.3496	-1.67792	0.175941	0.130396	-0.0742574	-0.301881	-0.0566337	0.256337	0.400693	0.139505	-0.477525	-0.0490099	-0.00564356	-0.175545	-0.118614	-0.356832	0.232079	-0.107228	0.289208	0.241485	-0.122079	0.250792	-0.218416	0.134951	0.0628713	-0.305248	0.0247525	0.107822	-0.544158	-0.0211881	0.0305941	-0.233861	0.126832	0.290693	0.08
0.0160396	-1.41515	-1.54	0.204752	0.292277	-0.164554	-0.203366	0.0336634	0.283564	0.342079	-0.0242574	-0.390891	0.00386139	0.00455446	-0.143465	0.0757426	-0.542277	0.228317	-0.117129	0.0914852	0.173069	-0.154653	0.345446	-0.184653	0.00653465	0.222475	-0.161089	0.119208	-0.0255445	-0.610396	-0.12604	0.0362376	-0.268119	-0.00653465	0.268812	-0.0394059
-0.0387129	-1.31762	-1.77337	0.421881	0.22604	-0.0464356	-0.143366	0.0345545	0.280693	0.354455	0.0651485	-0.208317	-0.159208	-0.105545	0.107723	0.300396	-0.49396	0.193069	-0.0948515	0.336832	0.195347	-0.337228	0.259802	-0.213465	0.0681188	0.11396	-0.226634	-0.079703	0.102376	-0.83604	-0.282871	-0.0475247	-0.654257	0.0634654	0.0868317	-0.0791089
-0.0672277	-1.22069	-1.88792	0.270891	0.48099	-0.0474257	-0.243069	0.00663366	0.176436	0.408416	-0.0248515	-0.64396	-0.0331683	-0.0681188	0.270495	0.204059	-0.456634	0.159406	-0.0428713	0.0846535	0.0676238	-0.359109	0.234752	-0.120396	0.101584	0.155446	-0.231287	-0.11802	0.100891	-0.813762	-0.138416	-0.0719802	-0.469604	0.0641584	-0.0533663	-0.039703
-0.123564	-1.00436	-1.83554	0.298713	0.0562376	-0.0190099	-0.331782	-0.120594	0.301485	0.26198	0.0029703	-0.460198	-0.199703	-0.220099	0.554554	0.149307	-0.53802	0.216337	0.0779208	0.139703	0.149901	-0.263564	-0.0427723	-0.181089	0.0440594	0.255347	-0.117426	-0.156337	-0.00059406	-0.925248	0.165446	0.313861	-0.380495	0.0663366	-0.0756436	-0.0809901
-0.0283168	-1.22594	-1.89248	0.385941	0.428416	0.079802	-0.112376	-0.0187129	0.445644	0.182772	0.0310891	-0.585149	0.0425743	-0.331485	0.588317	0.123267	-0.442772	0.152673	-0.216337	0.0181188	0.175248	-0.15802	0.295743	-0.0913861	0.0744555	0.0543564	-0.0855445	-0.105941	-0.251188	-0.869802	-0.019802	0.162871	-0.0622772	0.0679208	0.0239604	-0.0137624
0.0105941	-1.22663	-1.97317	0.293762	0.151485	0.00673267	-0.333663	0.0421782	0.469406	0.19297	0.0619802	-0.498515	-0.0235644	-0.205049	0.655149	0.203168	-0.436535	0.242376	-0.108713	-0.204059	0.0481188	-0.283069	0.268218	-0.120396	-0.10396	0.0258416	-0.0926733	-0.205842	-0.0632673	-0.762772	0.0340594	0.0381188	0.246733	0.189802	0.0341584	-0.0437624
0.0464356	-1.34733	-1.71386	0.291287	0.467327	-0.11703	-0.334356	-0.0760396	0.255049	0.162871	-0.0267327	-0.530099	-0.0588119	-0.256733	0.291386	0.213366	-0.237624	0.0926733	-0.0283168	0.0153465	0.130396	-0.24901	0.0531683	-0.0209901	0.0785148	-0.0254455	-0.139109	-0.0938614	-0.157228	-0.839208	0.0915842	0.144951	0.155248	-0.0552475	0.0430693	-0.0144554
-0.0652475	-1.37881	-1.58772	0.189109	0.383861	-0.0889109	-0.204356	-0.0135644	0.251386	0.214059	0.25703	-0.149505	-0.00287129	-0.128713	0.134455	0.161386	-0.260198	0.0617822	0.0287129	-0.26099	0.0648515	-0.123168	0.115941	-0.0206931	0.147525	0.11297	-0.0787129	-0.100594	-0.07	-0.98099	0.276931	0.0514852	0.212475	0.139406	-0.169208	-0.206337
-0.126238	-1.2198	-1.65396	0.435743	0.447228	0.0423762	-0.206535	-0.173861	0.145842	0.185842	0.140792	-0.397921	0.0911881	-0.0528713	-0.0790099	0.169406	-0.535545	0.209307	-0.232772	-0.196931	0.0892079	0.131386	-0.0315842	-0.0928713	0.0475247	0.0928713	-0.247426	-0.0470297	-0.100297	-1.02772	0.275347	0.0236634	0.0787129	-0.0178218	-0.162673	-0.339406
-0.0760396	-1.05921	-1.93238	0.315049	0.360891	-0.17703	-0.248119	-0.0413861	0.331881	0.133861	0.0436634	-0.488515	-0.0122772	-0.0757426	-0.543168	0.210495	-0.338416	0.239307	0.154257	-0.251089	0.0811881	0.357921	-0.0591089	0.0353465	-0.0105941	0.00039604	-0.0664356	-0.0537624	0.0227723	-1.41723	0.182871	0.0867327	-0.174951	-0.099703	-0.129307	-0.270891
-0.13396	-0.929901	-1.80426	0.314752	0.174257	-0.116733	-0.0281188	-0.0392079	0.358218	0.142277	0.300198	-0.519802	-0.177525	0.11099	-0.28703	0.131386	-0.172574	0.0552475	0.141188	-0.272079	0.103465	0.332871	-0.12505	-0.0246535	0.080396	0.197822	-0.237525	-0.152079	0.0671287	-1.12545	0.359505	-0.310792	-0.709307	0.375842	-0.0521782	-0.344554
-0.0230693	-0.842079	-1.8498	0.0635644	0.23703	-0.0880198	-0.030297	-0.0655445	0.420396	0.179703	0.407624	-0.610396	-0.05	-0.188515	-0.0317822	-0.107228	-0.513564	0.0208911	-0.0620792	-0.362178	0.0039604	0.369307	-0.0513861	-0.0659406	-0.0990099	0.203663	-0.113663	-0.0385149	0.0692079	-0.983069	0.518218	-0.310099	-0.402079	0.0344554	0.0764356	-0.375446
-0.391881	-0.903366	-1.69822	0.00108911	0.271683	-0.149505	0.099703	-0.133069	0.392574	0.21901	0.0666337	-0.482574	-0.143762	-0.151683	0.192871	0.246337	-0.313069	-0.0212871	-0.00257426	-0.381683	0.244752	0.316337	0.0441584	-0.0272277	0.0847525	-0.0364356	-0.190792	-0.163465	-0.179604	-1.18941	0.327228	-0.0586139	-0.712079	0.165941	-0.137426	-0.349109
-0.100693	-0.362673	-1.58743	0.276139	0.40198	0.0392079	-0.00059406	-0.100594	0.335644	0.137723	0.176238	-0.821386	-0.117822	-0.263663	0.446931	0.0743564	-0.424356	0.0169307	-0.0165347	-0.34	0.0445545	0.500594	-0.039604	0.0621782	0.0572277	0.090396	-0.158218	-0.140297	0.029802	-1.33614	0.356931	0.253564	-0.495149	0.0359406	-0.100396	-0.351485
-0.148317	-0.300198	-1.93762	0.212079	0.18099	-0.18297	-0.28396	-0.186931	0.338416	0.147921	-0.060099	-0.629307	-0.25	-0.197228	0.42099	-0.0475247	-0.445149	0.0444555	0.121683	-0.446733	0.00584158	0.508614	-0.0339604	0.0315842	0.118119	0.227921	-0.294059	0.192574	0.0312871	-1.22158	0.299406	-0.0214852	-0.190099	-0.0815842	0.0682178	-0.474554
-0.107129	-0.297129	-1.9497	0.268119	0.27495	-0.00485149	-0.123267	-0.273564	0.37	0.0963366	0.135446	-0.470297	-0.22396	-0.224455	0.335644	0.0935644	-0.566436	0.10198	0.269604	-0.373465	0.0841584	0.545743	-0.158713	0.00069307	0.00059406	0.106931	-0.171188	0.0676238	0.132772	-0.985545	0.430396	0.29099	-0.0637624	-0.109802	0.136535	-0.41802
-0.37901	-0.00277228	-2.15554	0.0731683	0.277129	-0.125446	-0.155149	-0.24198	0.373366	0.135941	0.31	-0.442772	0.149901	0.0936634	0.149406	0.0759406	-0.517525	0.157624	-0.0242574	-0.168515	0.0145545	0.64604	-0.0231683	-0.029604	0.0911881	0.183366	0.0719802	0.0617822	0.193366	-0.942574	0.330396	-0.145644	0.0515842	-0.0129703	-0.0451485	-0.229505
-0.306337	-0.059703	-2.39683	-0.150792	0.217426	-0.00762376	-0.0635644	-0.149208	0.182475	-0.0185148	0.202079	-0.28802	0.0184158	0.100198	-0.00960396	-0.222673	-0.538911	-0.186139	-0.0070297	-0.221782	0.163465	0.534356	0.0723762	0.00227723	0.0648515	0.163267	-0.125149	0.145248	0.294257	-0.897723	0.301584	0.0762376	0.36505	0.090495	0.0350495	-0.287921
-0.165149	0.0761386	-2.54881	0.0361386	0.347129	0.0316832	0.0255445	-0.180099	0.433465	0.120198	0.245347	-0.319604	-0.10505	-0.0542574	0.0646535	-0.182475	-0.250891	0.121089	-0.269802	-0.520297	-0.00831683	0.66297	-0.010297	0.0331683	0.0664356	0.232277	0.0583168	0.139109	0.224554	-0.812574	0.648515	-0.289703	0.31396	0.244752	0.133366	-0.505149
-0.214653	0.0835644	-2.54198	-0.187228	0.438119	-0.0410891	0.0652475	-0.148614	0.313465	0.219505	0.15802	-0.35396	0.197228	0.174653	-0.090396	-0.14198	-0.365644	0.118614	0.0282178	-0.597921	-0.0786139	0.640099	-0.225644	-0.0264356	0.0690099	0.181881	0.112178	0.104455	0.227624	-1.04673	0.577525	-0.0672277	-0.0978218	0.186634	0.173861	-0.531782
-0.174158	0.186634	-2.72733	-0.129406	0.190594	-0.0419802	0.0667327	-0.0871287	0.404059	0.195644	0.141683	-0.384851	0.039802	0.0611881	0.00326733	-0.0908911	-0.389802	0.0289109	-0.100792	-0.361485	0.0293069	0.617228	-0.040297	0.214158	0.069901	0.060297	0.0128713	0.199208	0.11198	-1.06446	0.606832	-0.343762	-0.418317	0.130693	0.213465	-0.409901
-0.0693069	0.341188	-2.81178	-0.22495	0.0287129	-0.102574	0.0955446	-0.145248	0.404059	0.263366	0.0637624	-0.31802	0.0351485	0.0658416	0.0125743	-0.136634	-0.322673	-0.00386139	-0.113762	-0.315347	0.0527723	0.585941	-0.0350495	0.185149	0.203663	-0.0229703	0.154752	0.28396	0.304455	-1.14604	0.60495	-0.191584	-0.646139	0.166634	0.133663	-0.346139
-0.273861	0.285149	-2.96812	-0.228713	0.0693069	-0.252277	0.12396	-0.144257	0.435941	0.215149	0.192376	-0.197426	-0.00821782	-0.118911	0.0905941	-0.0627723	-0.347426	-0.00485149	0.0251485	-0.238317	0.115049	0.503069	-0.177624	0.0360396	0.10703	0.0459406	0.0551485	0.217822	0.178119	-0.947426	0.542475	-0.0885149	-0.651386	0.169109	0.172277	-0.271485
0.0206931	0.257624	-3.14228	-0.291782	-0.0009901	-0.100792	0.0623762	-0.263366	0.406832	0.134356	0.0519802	0.0337624	-0.0441584	-0.392079	0.466238	0.010198	-0.210594	0.0826733	0.0836634	-0.351287	0.257327	0.661089	0.332673	0.00732673	0.050495	0.143366	0.105842	0.243465	0.152475	-1.09634	0.450396	-0.274158	-0.188812	0.231287	0.179406	-0.237129
-0.115941	0.270396	-3.32525	-0.353267	0.030495	-0.128317	0.150495	-0.171485	0.508416	0.0139604	0.122475	0.0975247	0.114257	0.0512871	0.529901	-0.254356	-0.398119	-0.167624	0.00217822	-0.363663	0.0293069	0.510099	0.0631683	0.0364356	0.0826733	-0.0704951	0.0662376	0.139703	0.0549505	-1.08515	0.508515	-0.120792	-0.137228	0.265248	-0.0653465	-0.263069
-0.259802	0.332475	-3.2296	-0.397228	0.0716832	-0.0348515	0.0589109	-0.110891	0.437822	-0.0983168	0.221782	0.349307	0.142079	-0.134059	0.445842	-0.269505	-0.0818812	-0.289109	-0.070198	-0.35099	0.0230693	0.837525	0.00376238	0.126139	0.0563366	-0.0339604	-0.00306931	0.207525	0.156535	-1.10594	0.347921	0.0706931	0.294158	0.080495	0.102079	-0.167525
-0.184059	0.461188	-3.22584	-0.429703	0.132277	-0.0351485	0.060099	-0.0405941	0.319406	-0.160594	0.26099	0.451188	-0.050396	-0.0978218	0.360198	-0.0662376	0.0823762	-0.201584	0.228416	-0.233663	0.0205941	0.776238	0.0121782	0.156139	0.151287	-0.0271287	0.0779208	0.132871	0.0990099	-0.816931	0.166931	-0.0780198	0.653366	0.0876238	0.286733	0.00049505
-0.196139	0.401782	-3.27901	-0.30099	0.00415842	-0.125446	0.210792	-0.140297	0.350693	-0.243762	0.176337	0.0577228	-0.0244555	0.157228	-0.0730693	-0.17297	0.0286139	-0.173663	0.125743	-0.0672277	0.0869307	0.78495	0.020198	0.257327	0.197525	-0.171287	0.130792	0.129406	0.161188	-0.739505	0.195644	-0.457723	0.644059	0.224059	0.140396	-0.152376
0.0390099	0.532376	-3.35911	-0.302475	0.00762376	-0.244554	0.271089	-0.0775248	0.383168	-0.269802	0.274653	-0.156139	-0.0544555	0.0736634	-0.318812	-0.470891	0.0667327	-0.365842	0.0858416	0.050396	0.0438614	0.604257	-0.00425743	0.126436	0.162871	-0.194158	0.154257	0.00574257	0.193663	-0.701782	0.224455	-0.39495	0.328218	0.137723	0.366238	-0.0149505
-0.0346535	0.591089	-3.25802	-0.305545	0.010396	-0.124851	0.121683	-0.226832	0.515545	-0.174257	0.283069	-0.209703	0.0733663	0.170396	-0.254554	-0.338218	0.0166337	-0.36703	-0.0565346	-0.122871	-0.0492079	0.208317	0.00405941	0.256139	0.299406	0.213267	0.14901	0.221089	0.0326733	-0.372871	0.441683	-0.392079	-0.0206931	0.0454455	0.182475	-0.195743
-0.050396	0.659208	-3.30406	-0.275248	-0.0774257	-0.00455446	0.0913861	-0.283762	0.390792	-0.169604	0.226832	-0.139505	0.0111881	-0.0128713	-0.440792	-0.414257	-0.128416	-0.239208	-0.0986139	-0.108416	-0.0510891	0.480792	0.112376	0.15703	-0.0365347	-0.0577228	-0.0393069	0.0277228	0.10396	-0.463267	0.413762	-0.391386	-0.190198	-0.0707921	0.188713	-0.0943564
-0.0343564	0.467327	-3.25673	-0.275248	0.119109	-0.125149	0.178911	-0.322871	0.363861	-0.13396	0.231782	-0.114356	0.0724753	0.211782	-0.39802	-0.433762	-0.119109	-0.33802	0.080495	0.0964356	-0.112574	0.485149	-0.0390099	0.187327	0.0881188	0.11099	-0.0751485	-0.00405941	0.166733	-0.452178	0.312772	-0.257921	-0.579208	0.0213861	0.252376	-0.173267
0.0438614	0.538911	-3.29752	-0.0552475	0.0543564	-0.0954455	0.176139	-0.252277	0.308515	-0.156832	-0.0129703	-0.190792	0.0688119	0.0964356	-0.0852475	-0.39297	-0.111386	-0.399901	0.0981188	-0.0193069	0.00712871	0.620495	0.128713	0.0679208	0.221782	0.0165347	-0.0222772	0.0256436	0.199901	-0.502574	0.250594	-0.193861	-0.429109	-0.223366	0.35703	-0.0736634
-0.0987129	0.568911	-3.46861	-0.182475	-0.161584	-0.0657426	0.145743	-0.251386	0.464455	-0.183168	0.0219802	-0.365644	0.099703	0.131386	0.137921	-0.164257	-0.22396	-0.23901	0.0247525	0.155248	-0.0837624	0.431485	0.0661386	0.129406	0.224257	0.21396	-0.0588119	-0.0650495	-0.0194059	-0.584851	0.377525	-0.192871	-0.437426	-0.0323762	0.291584	0.0662376
-0.0519802	0.601089	-3.38752	-0.27	-0.0288119	-0.0373267	0.116733	-0.352277	0.441584	-0.267822	-0.0333663	-0.185842	-0.0636634	-0.0842574	0.42198	-0.332871	-0.0640594	-0.340891	-0.0473267	0.358218	-0.174951	0.403069	0.115446	0.128812	0.230198	0.0710891	-0.00742574	-0.00623762	-0.049703	-0.417426	0.0857426	-0.158218	-0.167624	-0.310198	0.366832	0.108317
-0.317129	0.789802	-3.48465	-0.267822	-0.0547525	0.0620792	0.176733	-0.0689109	0.199604	-0.233465	0.00405941	-0.0641584	0.0631683	0.201386	0.517525	-0.172673	0.104356	-0.273366	0.0623762	0.151485	0.0362376	0.332475	0.182277	0.00782178	0.16604	0.297921	0.0169307	0.0815842	0.111485	-0.407822	0.116931	-0.153861	0.134951	-0.0874257	0.0835644	0.0219802
-0.0204951	0.828218	-3.68149	-0.326535	0.0405941	-0.0375248	-0.0445545	-0.21802	0.205446	-0.167525	0.101485	-0.169406	-0.0707921	0.296337	0.374059	-0.0933663	-0.0791089	-0.434554	0.0528713	0.106634	-0.174653	0.358218	0.218416	0.0393069	0.272871	0.145347	0.139901	-0.0405941	0.202079	-0.400099	0.0238614	-0.0158416	0.258416	-0.275842	0.188515	-0.0275248
-0.0965346	0.95297	-3.68515	-0.265049	-0.103465	-0.070297	0.115743	-0.187426	0.0922772	-0.220792	0.103366	-0.0992079	0.0576238	0.211584	0.410594	-0.080297	-0.0329703	-0.526634	0.143564	0.0493069	0.0050495	0.10604	0.226832	0.0386139	0.149109	0.0921782	0.0321782	-0.103069	0.0117822	-0.423366	0.301683	0.110693	0.436337	-0.374554	0.314059	-0.0170297
-0.0531683	0.919604	-3.7301	-0.394752	0.121485	-0.0411881	0.0154455	-0.187129	0.160891	0.00663366	0.146832	-0.00584158	0.144554	0.247426	-0.0835644	-0.0982178	-0.0258416	-0.498218	0.0952475	0.502673	-0.0849505	0.413861	0.0142574	0.0080198	0.0368317	-0.0306931	0.0250495	-0.0143564	-0.139208	-0.540297	0.149802	0.146535	0.326139	-0.0832673	0.0704951	0.155347
-0.0683168	0.572772	-3.54347	-0.424752	-0.195743	0.179406	0.232673	-0.187426	0.136733	0.0109901	0.0490099	0.161584	-0.107327	0.252079	-0.239505	-0.335149	-0.29901	-0.349505	-0.00158416	0.330297	-0.0864356	0.259901	0.39198	0.15495	0.221485	0.0673267	0.148515	-0.0483168	-0.236139	-0.348119	0.267426	0.0936634	0.286634	-0.242673	0.20703	0.22396
-0.272871	0.656535	-3.45594	-0.326337	-0.0923762	0.118812	0.334158	-0.278614	0.173861	-0.115545	0.0793069	0.172475	-0.0509901	0.0345545	-0.484851	-0.0752475	-0.0115842	-0.351386	0.148812	0.223267	-0.145545	0.187426	0.279703	0.059703	0.197723	-0.0439604	0.0383168	-0.0790099	-0.265842	-0.259406	0.328416	-0.342376	-0.312673	-0.0486139	0.113168	0.234158
-0.100495	0.588416	-3.57505	-0.20703	-0.0889109	-0.0120792	0.113267	-0.157723	-0.00712871	0.166535	0.302079	0.25604	0.0465346	0.0070297	-0.225842	-0.0322772	-0.286337	-0.38297	-0.0492079	0.325941	-0.145842	0.184653	0.447723	0.115347	0.23297	0.0259406	-0.059703	0.0712871	-0.266139	-0.508812	0.298416	-0.296238	-0.350099	0.199208	0.160297	0.0831683
0.132772	0.520693	-3.48386	-0.264554	-0.0833663	0.0588119	0.0848515	-0.348317	0.00128713	0.0490099	0.0835644	-0.019802	0.133663	-0.148614	-0.0568317	-0.196832	-0.0576238	-0.385446	0.00178218	0.34198	-0.0852475	0.209307	0.264257	0.0189109	0.176634	0.133663	0.0222772	-0.240297	-0.0133663	-0.481287	0.0456436	-0.0828713	-0.359406	-0.0507921	-0.0254455	0.159604
0.295149	0.302376	-3.67297	-0.452376	-0.356634	0.119703	0.0141584	-0.37703	0.0390099	0.0821782	0.0248515	-0.465545	-0.0575247	0.0745545	0.200594	-0.0223762	0.0107921	-0.258515	-0.0662376	0.514356	-0.0846535	0.203069	-0.114455	-0.0851485	0.241881	0.143267	0.0451485	-0.0530693	-0.040297	-0.544653	0.324653	0.171188	-0.146535	-0.401089	0.00980198	0.256436
0.21505	0.386832	-3.6098	-0.291782	-0.0144554	-0.0394059	-0.0771287	-0.277723	0.238614	-0.0762376	0.155743	-0.75604	0.157822	-0.143861	0.429901	-0.0375248	0.089802	-0.450099	0.146337	0.527327	-0.0243564	0.196832	-0.0119802	0.100198	0.247723	-0.0681188	-0.0816832	-0.0248515	-0.378812	-0.299406	0.0467327	0.0858416	0.0866337	-0.208317	-0.0458416	0.352277
0.37802	0.44901	-3.48149	-0.19901	-0.110099	0.0321782	-0.0143564	-0.128317	0.309406	-0.105842	0.118515	-0.985842	-0.0921782	-0.201386	0.496733	-0.244851	0.158812	-0.291683	0.0368317	0.259703	-0.0843564	-0.0608911	0.21604	0.0361386	0.16297	-0.030297	-0.367822	0.00178218	-0.230693	-0.363762	0.0158416	0.207723	0.239208	0.0741584	0.019703	0.360396
0.36099	0.470594	-3.25	-0.227723	0.0248515	-0.0050495	-0.0149505	-0.218614	0.361683	-0.103663	0.0327723	-0.772376	-0.0243564	0.019802	0.255049	-0.320891	0.0184158	-0.322079	0.0288119	0.548416	0.0753465	-0.0407921	0.122574	0.00089109	0.166733	-0.0541584	-0.00455446	0.0587129	-0.00851485	-0.177228	-0.102277	0.0607921	0.732079	-0.204653	-0.225644	0.65
0.37396	0.18	-3.14327	-0.0358416	-0.0580198	0.156139	0.0837624	-0.188614	0.431881	-0.102772	0.256139	-0.716436	-0.0630693	-0.170198	-0.09	-0.336337	0.030495	-0.393564	0.0928713	0.620495	0.0050495	0.157426	0.0678218	0.11604	0.201089	0.0154455	-0.162376	0.185941	-0.346931	-0.181584	-0.00673267	0.372376	0.532871	-0.237426	0.090198	0.758119
0.48604	0.0191089	-2.96099	-0.164653	0.168218	0.221386	0.144158	-0.0980198	0.310891	-0.279901	0.131089	-0.964257	0.18505	0.0519802	-0.232277	-0.514851	-0.0493069	-0.0847525	-0.0126733	0.690396	-0.175248	-0.0746535	0.0127723	-0.00950495	0.115446	-0.0352475	-0.138515	0.154653	-0.195049	-0.220594	-0.0893069	0.0645545	0.461485	-0.29901	0.030495	0.76495
0.64802	0.257921	-2.87911	-0.0328713	0.136535	0.00386139	0.173564	-0.030198	0.510495	-0.379604	0.206733	-0.68396	0.0350495	0.245149	-0.384554	-0.220594	-0.0412871	-0.206337	-0.140693	0.549703	-0.0552475	0.168218	0.0149505	-0.175049	0.0176238	0.122277	-0.0865347	0.0518812	0.0290099	-0.158713	-0.123168	-0.0351485	0.363663	-0.21	0.0926733	0.740792
0.629802	0.100495	-2.66842	-0.160693	-0.135446	0.00544554	0.260792	-0.0692079	0.40198	-0.131485	0.141683	-0.464257	0.0353465	0.126139	-0.442376	-0.358515	0.0292079	-0.367921	0.00742574	0.460297	-0.175545	0.189604	0.0471287	-0.0805941	0.0892079	0.070297	-0.0333663	0.119703	-0.145446	-0.30297	-0.15	0.256634	0.0343564	0.101287	0.225149	0.675743
0.491485	0.182772	-2.52396	-0.127921	-0.100198	0.00792079	0.171386	0.150792	0.0643564	-0.22396	-0.0315842	-0.0614852	0.0940594	-0.00019802	-0.437129	-0.256139	0.0412871	-0.0515842	-0.146931	0.538713	-0.117129	0.21099	0.0183168	-0.059802	0.0922772	-0.00891089	0.0306931	0.0775248	-0.180792	-0.0347525	-0.11604	0.00386139	-0.287129	-0.114356	0.0995049	0.721287
0.434158	-0.00594059	-2.74673	-0.38099	-0.125248	-0.0184158	0.111089	0.150495	0.138911	-0.195545	0.0383168	0.0106931	-0.0656436	-0.089901	-0.34099	-0.245644	-0.13198	-0.215545	-0.252871	0.546436	-0.397723	0.140495	-0.0782178	0.0536634	-0.00485149	-0.069604	-0.0445545	-0.0140594	0.0148515	-0.132178	-0.00920792	0.121089	-0.411782	0.0443564	0.0753465	0.596238
0.262772	-0.265248	-2.74455	-0.0331683	0.0405941	-0.0762376	0.0823762	0.250495	0.280297	-0.285545	-0.0170297	0.0469307	-0.186832	-0.0877228	0.29703	-0.513663	-0.151188	-0.33802	-0.186535	0.614455	-0.145842	0.310693	-0.0738614	-0.230297	-0.0323762	0.0381188	-0.049901	0.0437624	-0.203861	-0.039604	-0.0624753	0.0316832	-0.449901	-0.144752	0.138416	0.662079
0.276337	-0.299307	-2.45802	-0.193762	-0.113168	0.148416	0.111386	0.178614	-0.0164356	-0.326832	0.019505	0.553168	-0.156139	-0.0249505	0.235644	-0.212178	-0.241584	-0.101386	-0.382673	0.561881	-0.116436	0.302079	-0.0412871	-0.204951	0.00039604	-0.0516832	0.0458416	0.142178	-0.25802	-0.148317	-0.0544555	0.373267	-0.279505	0.0445545	-0.0379208	0.698218
0.257822	-0.332178	-2.64059	-0.135248	-0.137327	-0.1	0.110396	0.276436	0.0537624	-0.388119	-0.137327	0.563663	-0.0686139	-0.151584	0.560594	-0.230792	-0.19198	-0.222871	-0.386733	0.497822	-0.117921	0.111881	-0.0375248	-0.210495	-0.304951	0.089802	-0.0891089	-0.0160396	-0.0924752	-0.14604	-0.397624	0.21297	0.121782	0.101188	-0.102673	0.643168
0.198911	-0.484752	-2.26248	-0.0961386	-0.132079	0.0242574	0.079802	0.242772	0.0939604	-0.479307	-0.101188	0.914851	0.0295049	0.0405941	0.505842	-0.0275248	-0.0324752	-0.0344554	-0.269802	0.356139	-0.147624	0.220396	0.0355446	-0.0591089	-0.112475	0.0414851	0.00722772	0.0742574	-0.157525	-0.153465	-0.137723	0.404851	0.330693	-0.181287	0.0328713	0.53
0.42604	-0.513168	-2.16287	-0.167426	0.00158416	-0.00356436	0.079505	0.170594	0.10505	-0.540891	-0.312871	1.0597	0.121089	0.0171287	0.00990099	-0.265446	-0.235049	-0.00544554	-0.274752	0.584851	-0.118515	0.110198	0.0708911	-0.126139	-0.109703	0.0207921	0.0666337	0.0142574	-0.302574	-0.00910891	-0.25	0.282376	0.540396	0.00683168	-0.274059	0.568317
0.464356	-0.73198	-2.1201	-0.291782	-0.0956436	0.0695049	0.049802	0.238713	0.140891	-0.394059	-0.0453465	1.16861	0.0619802	-0.200099	-0.235149	-0.104356	0.0536634	0.0505941	-0.559406	0.24099	-0.117822	0.319406	0.0146535	-0.201683	-0.0463366	0.0306931	-0.0664356	0.174554	-0.207624	-0.104455	-0.302574	0.0329703	0.309604	0.00811881	-0.177525	0.575743
0.605545	-0.94099	-2.04495	-0.103663	0.0105941	0.00415842	0.260396	0.296832	0.121386	-0.425941	-0.0379208	1.34723	0.0910891	-0.0673267	-0.225545	-0.123564	-0.215545	0.111188	-0.215941	0.407822	-0.209703	0.150792	-0.0221782	-0.137822	-0.202277	0.161188	-0.128218	0.174851	-0.101782	-0.108218	-0.20297	-0.0989109	0.299703	0.130297	-0.112277	0.52198
0.676139	-0.719406	-1.93485	-0.150792	0.0461386	0.0369307	0.200396	0.265248	0.0718812	-0.298416	-0.029604	1.48733	0.254158	0.0276238	-0.213762	-0.422772	-0.0437624	-0.0388119	-0.099703	0.501287	-0.152475	0.209703	-0.049703	-0.24396	-0.0376238	0.080495	-0.0394059	0.0454455	0.113168	-0.0750495	-0.0437624	-0.0989109	-0.0883168	0.0718812	-0.0773267	0.52604
0.527624	-0.938416	-1.97347	-0.120396	-0.0207921	0.140891	0.112574	0.295545	0.0548515	-0.272178	-0.405941	1.66653	-0.0645545	-0.0983168	-0.143861	-0.380693	-0.310693	0.140594	-0.104653	0.36	-0.0318812	0.260792	-0.108218	-0.0889109	-0.0626733	-0.00930693	-0.131485	0.0770297	0.116931	-0.111287	0.12703	-0.132277	-0.346931	-0.0771287	0.0285149	0.56099
0.608713	-0.99604	-1.85564	-0.069703	-0.079604	0.0817822	0.205049	0.234257	-0.00554455	-0.376832	-0.182178	1.68941	-0.0635644	0.123267	0.0141584	-0.32703	-0.297426	0.0805941	-0.200495	0.29802	-0.122178	0.210297	-0.13703	-0.40297	-0.185842	-0.0611881	-0.159604	0.179802	0.0925743	-0.278713	0.0747525	0.115545	-0.316139	-0.115545	-0.276238	0.59802
0.677624	-1.05515	-1.70436	-0.138713	-0.167723	0.205248	-0.0127723	0.133267	0.162475	-0.312376	-0.147525	1.49446	0.0382178	-0.155149	0.18099	-0.372475	-0.501683	0.05	-0.304554	0.437921	-0.0936634	0.267327	0.308218	-0.127228	-0.05	-0.0228713	-0.070198	0.0813861	0.0969307	-0.122376	0.112178	-0.00653465	-0.674752	-0.173366	-0.0609901	0.546436
0.630594	-1.26248	-1.70782	-0.0876238	-0.0449505	0.0486139	0.179406	0.160198	0.141782	-0.167624	-0.234059	1.46267	0.0409901	0.00237624	0.468416	-0.0777228	-0.234951	0.0808911	0.0420792	0.196238	-0.28396	0.31901	-0.00465347	-0.132178	0.0758416	0.0448515	-0.00019802	0.244158	0.10099	0.120792	0.0284158	-0.110198	-0.401188	-0.141188	-0.307921	0.553861
0.39396	-1.32129	-1.53792	-0.0668317	-0.133465	0.27198	0.0940594	0.22802	0.342673	-0.325049	-0.360693	1.33178	0.135347	-0.0554455	0.314851	-0.565446	-0.159208	-0.201584	0.00891089	0.292673	-0.156139	0.458119	0.0715842	-0.234653	0.0529703	-0.0677228	-0.189604	0.184158	0.135248	-0.192673	-0.0644554	0.137921	-0.0567327	-0.168416	-0.0545545	0.461287
0.524752	-1.3795	-1.56248	-0.0764356	-0.252772	0.346634	0.0956436	0.25703	0.223465	-0.332772	-0.0457426	1.27545	0.0811881	-0.0554455	0.261683	-0.392772	-0.32099	0.0156436	-0.373267	0.139406	-0.187426	0.419802	-0.0538614	-0.106535	0.0288119	-0.0009901	-0.0707921	0.0838614	0.141485	-0.069802	-0.089802	-0.0545545	0.369901	-0.417228	-0.199604	0.569901
0.504356	-1.53525	-1.29267	-0.0276238	-0.291485	0.222178	0.126337	0.0374257	-0.0466337	-0.440594	-0.259901	0.999802	-0.0060396	0.0351485	0.178515	-0.220693	-0.0827723	0.0122772	-0.154851	0.185941	-0.259604	0.160198	0.141386	-0.138713	0.195248	0.0363366	0.152277	0.0234653	0.175545	-0.233861	-0.0888119	-0.0570297	0.335842	-0.227228	-0.00435644	0.581386
0.485149	-1.4603	-1.05911	0.0212871	-0.132178	0.0377228	0.218812	0.345545	0.273564	-0.508911	-0.254653	1.18446	0.275149	0.226337	-0.0662376	-0.175248	0.0892079	0.0989109	-0.246436	0.0929703	-0.160792	0.372772	0.0563366	0.00920792	0.143069	0.142178	0.0353465	0.0827723	0.0917822	-0.0166337	-0.177822	0.0667327	0.270891	-0.165347	0.150594	0.649406
0.337822	-1.51416	-1.00178	-0.169802	-0.161287	0.0130693	0.162475	0.155545	0.0337624	-0.356931	-0.247228	1.30604	-0.00118812	-0.0233663	-0.252475	-0.225941	-0.229505	0.0333663	-0.128911	0.233168	-0.0417822	0.0715842	-0.0372277	0.00584158	0.0492079	0.0774257	0.0681188	0.0808911	-0.244554	-0.0188119	-0.0290099	0.0310891	0.0119802	-0.384356	0.157723	0.529703
0.318416	-1.56832	-0.656436	-0.148713	0.060198	0.11802	0.133762	0.0943564	0.0146535	-0.185941	-0.26802	1.43881	0.18099	0.167525	-0.335644	-0.315446	-0.0791089	0.190594	0.0286139	0.0505941	0.0154455	0.439307	-0.0607921	-0.116238	0.115446	0.126931	0.223069	0.210297	-0.150297	-0.104158	0.130099	-0.0323762	-0.215446	-0.478119	-0.0264356	0.75901
0.358713	-1.34307	-0.337723	-0.0070297	-0.158218	0.154158	0.255644	-0.0290099	-0.134257	-0.0643564	-0.259703	1.56337	0.0938614	-0.151287	-0.300693	-0.455545	-0.219901	0.186634	0.114851	-0.00415842	0.263564	0.18	0.134455	-0.09	0.248317	0.223366	-0.0569307	0.0484158	-0.0134653	-0.0107921	-0.149208	0.144851	-0.693762	-0.260594	0.0185148	0.519505
0.307129	-1.36911	0.0462376	0.263366	-0.125743	0.278218	0.136832	0.0285149	-0.181881	-0.174951	-0.373168	1.73079	-0.12297	0.070198	-0.0769307	-0.473168	-0.188218	0.050396	0.0823762	0.00386139	0.229208	0.201881	0.0775248	-0.123168	0.0626733	0.142376	0.0434653	0.0159406	0.0217822	-0.0377228	-0.184455	-0.0385149	-0.85396	0.18099	0.0249505	0.587228
0.318317	-1.58446	0.0839604	0.135049	-0.0642574	0.221881	0.138713	0.0276238	-0.202871	-0.214554	-0.398515	1.76832	0.160198	-0.0479208	0.240198	-0.17901	-0.267822	0.102673	0.302673	-0.020297	0.326436	0.224455	-0.0156436	-0.126238	0.0677228	0.179703	0.0444555	0.114356	0.0892079	-0.216832	-0.0705941	0.0784158	-0.741089	0.179109	0.0323762	0.597723
0.138218	-1.64139	0.323564	0.125446	0.0353465	0.258317	0.200891	-0.0360396	-0.0617822	-0.346337	-0.553564	1.55327	-0.0854455	-0.0157426	0.364257	-0.102079	-0.208317	0.166535	0.112079	-0.205347	0.352376	-0.194455	0.0186139	-0.128119	0.172772	0.118317	-0.0858416	-0.0174257	0.0319802	-0.185941	-0.323366	0.0743564	-0.559406	-0.112376	-0.180891	0.548317
0.367822	-1.69594	0.747723	0.20396	-0.183762	0.203267	0.0130693	0.0217822	-0.211881	-0.238713	-0.519208	1.84475	-0.0210891	0.294554	0.441386	-0.267822	-0.0357426	0.279703	0.049604	0.0224752	0.467129	-0.273366	-0.0973267	-0.0414851	0.0771287	0.00514851	-0.0849505	-0.0793069	0.0347525	-0.214356	-0.300792	0.202178	-0.197822	-0.0451485	-0.172772	0.410693
0.435842	-1.7795	1.05406	0.164059	-0.123762	0.299505	0.116139	0.111782	-0.48505	-0.339802	-0.384851	1.94812	0.174851	-0.111089	0.568812	-0.312079	0.0577228	0.344752	0.166832	-0.040099	0.344653	-0.503267	0.128614	-0.167327	-0.00762376	0.205446	0.0178218	0.0688119	0.156337	-0.0530693	-0.39703	0.288119	0.235644	-0.23604	-0.168218	0.351485
0.165446	-1.83119	1.59861	0.182673	0.0359406	0.373762	-0.0723762	0.0217822	-0.0776238	-0.126634	-0.231188	1.99238	-0.0429703	0.0850495	0.326238	-0.294158	-0.112178	0.208218	0.205842	-0.183861	0.400099	-0.352871	0.00514851	-0.24099	-0.220792	0.0834653	0.0215842	0.134752	0.13	-0.181881	-0.213267	0.154455	0.195743	-0.148515	-0.262376	0.302574
0.204158	-1.91277	1.65653	0.143069	0.0659406	0.189604	0.0492079	0.330891	-0.412673	-0.325644	-0.318416	2.09851	0.0316832	0.248812	-0.0928713	-0.246238	0.130099	0.231188	0.205248	0.413564	0.367624	-0.364653	-0.167723	-0.203465	-0.0658416	0.0915842	0.0243564	0.0613861	0.0143564	-0.212475	-0.0982178	0.0622772	0.468713	-0.0816832	-0.0965346	0.160594
0.282475	-1.96198	1.95564	0.131287	-0.00188119	0.22703	-0.0090099	-0.00910891	-0.346832	-0.364554	-0.314951	2.24733	0.347525	0.00128713	-0.214158	-0.348614	0.212079	0.195347	0.16396	0.115049	0.27604	-0.40396	0.0475247	-0.247426	-0.0620792	0.0684158	-0.0122772	-0.0913861	-0.0143564	-0.275248	-0.255941	-0.0587129	0.31	0.0687129	-0.0931683	0.16901
0.190198	-1.66574	2.27129	-0.0310891	-0.0631683	0.135941	-0.126832	-0.00940594	-0.400297	-0.123168	-0.25099	2.19802	0.350594	0.152772	-0.266733	-0.302574	0.113465	0.00188119	0.0414851	-0.0363366	0.454455	-0.518713	0.0870297	-0.209901	0.0740594	0.106139	0.213366	0.0571287	-0.0531683	-0.233663	-0.0127723	-0.100594	0.0128713	-0.120693	-0.089802	0.111089
0.106733	-1.74832	2.40248	0.327228	0.0687129	0.33396	0.0256436	0.108515	-0.142871	-0.353366	-0.0848515	2.6603	0.194851	0.252079	-0.451485	-0.475248	0.168515	0.217525	0.26	-0.0883168	0.331089	-0.505149	-0.0277228	-0.251782	-0.140099	0.212277	0.0967327	-0.0650495	0.106832	-0.0820792	-0.019604	0.0225743	-0.423564	-0.178812	-0.0880198	-0.0981188
0.0551485	-1.74	2.59465	0.19604	0.0684158	0.19099	0.156238	0.108812	-0.329208	-0.392673	-0.0765346	2.61416	0.170099	0.0604951	-0.19495	-0.386436	0.131683	0.155644	0.127228	-0.140297	0.389307	-0.462772	-0.0484158	-0.21396	-0.163663	-0.0288119	0.219505	-0.0353465	-0.0131683	-0.0139604	-0.0289109	-0.0732673	-0.97	0.0436634	-0.116436	-0.149505
0.0650495	-1.64079	2.39079	0.114554	0.0991089	0.198713	-0.0646535	0.0169307	-0.165248	-0.213465	-0.101287	2.76574	0.147525	-0.130792	0.152178	-0.338218	0.156436	0.15099	0.195941	-0.0119802	0.265248	-0.604059	-0.395347	-0.287624	-0.12901	0.318317	0.222574	-0.1	-0.050099	-0.325248	-0.109505	-0.180099	-0.755842	0.0439604	0.0029703	-0.229604
0.00891089	-1.56366	2.5897	0.0705941	0.0385149	0.136733	-0.0353465	0.0453465	-0.130297	-0.444554	-0.0963366	2.68277	-0.0375248	-0.00148515	0.475941	-0.349604	0.500792	0.0173267	0.223465	-0.0626733	0.383663	-0.73	-0.134158	-0.0732673	0.0365347	0.264554	0.226238	-0.161485	0.142673	-0.396832	-0.0491089	-0.050099	-0.435149	-0.0473267	0.0341584	-0.0988119
-0.0408911	-1.67317	2.69297	0.0588119	0.069802	0.114455	-0.0669307	0.0425743	-0.0313861	-0.33604	-0.160099	2.82861	0.158911	0.116634	0.382475	-0.331287	0.177723	0.262673	0.253465	0.0782178	0.322673	-0.597822	-0.171089	-0.134851	0.0720792	0.32802	0.35901	-0.293663	0.232376	-0.105644	-0.250594	0.196535	-0.0661386	-0.0486139	-0.114554	-0.175842
-0.090396	-1.38297	3.0302	-0.0429703	0.259802	0.282574	-0.188218	0.103762	-0.113069	-0.346238	-0.114851	2.93475	0.133267	-0.0768317	0.329901	-0.185248	0.526436	0.229307	0.152772	-0.194653	0.0410891	-0.640297	-0.195842	-0.268218	-0.0826733	0.203267	0.199307	-0.0445545	0.141683	-0.234158	-0.321089	0.0924752	0.399208	-0.147129	-0.0808911	-0.132574
-0.300495	-1.52129	3.21366	-0.0241584	0.101386	0.319604	-0.227624	0.0418812	-0.103465	-0.32495	0.0692079	2.79495	0.228911	-0.0790099	0.21703	-0.201287	0.364951	0.0372277	0.402772	-0.0947525	-0.0279208	-0.642772	-0.0315842	-0.393168	-0.0461386	0.24604	0.20297	-0.13396	0.274752	-0.131683	-0.333762	-0.00336634	0.396436	-0.079901	0.166634	0.103465
-0.00881188	-1.4502	3.28178	0.0269307	0.00138614	0.237624	-0.00732673	-0.0493069	-0.0632673	-0.233366	-0.0155446	2.50574	-0.0752475	-0.0433663	-0.0293069	-0.158218	0.200693	0.0731683	0.0318812	-0.116436	-0.0292079	-0.89495	0.0308911	-0.305941	-0.0111881	0.251287	0.144851	-0.0133663	0.333861	-0.289901	-0.165842	-0.194653	0.200495	0.16703	-0.0836634	-0.126733
-0.0870297	-1.40089	3.53485	0.0170297	-0.0548515	0.276238	-0.124257	0.13099	-0.233069	-0.24505	0.0484158	2.86465	0.180594	-0.0146535	-0.243663	-0.113663	0.138911	-0.0278218	0.249703	-0.235347	0.069901	-0.298713	-0.0888119	-0.209307	-0.157723	0.15505	0.206733	-0.0433663	0.493861	0.00287129	-0.0172277	-0.137426	0.198614	-0.127228	0.00633663	-0.169703
-0.0134653	-1.38792	3.54347	-0.141584	0.134455	0.283564	-0.0633663	0.0144554	-0.29198	-0.136535	0.301881	2.7297	0.27495	-0.0449505	-0.279307	-0.317624	0.387426	-0.00118812	0.216634	-0.155743	-0.150693	-0.521188	-0.117228	-0.404554	-0.00405941	0.101485	0.240495	-0.0736634	0.367228	-0.125545	-0.371485	-0.141782	-0.247228	0.121881	0.00752475	-0.403267
-0.0889109	-1.40426	3.68772	-0.281485	-0.116535	0.322178	0.0272277	-0.0124753	0.129505	-0.116436	0.246139	2.45099	0.030198	0.0138614	-0.114356	-0.010297	0.107129	-0.0955446	-0.00405941	-0.0874257	-0.0924752	-0.68396	-0.114455	-0.350099	0.07	-0.0513861	0.214455	-0.203267	0.278812	-0.274059	-0.136733	-0.171089	-0.341881	0.0358416	0.141881	-0.298119
-0.326832	-1.5795	3.70564	-0.353267	-0.0308911	0.230198	-0.0321782	-0.0691089	0.166931	-0.129109	0.336733	2.67713	0.315446	0.101089	0.079703	0.00732673	0.10802	0.123267	0.242871	-0.207129	-0.123366	-0.658911	-0.0522772	-0.353762	0.103465	0.273861	0.220099	-0.384554	0.239109	-0.208911	-0.0625743	-0.424158	-0.537426	0.00673267	0.0440594	-0.222277
-0.105743	-1.46465	3.88792	-0.304455	-0.0624753	0.305743	-0.182475	0.0245545	0.0430693	-0.070198	0.340495	2.58743	-0.0811881	-0.121386	0.421584	0.115545	0.105545	-0.0992079	0.241287	-0.226832	-0.0683168	-0.443564	-0.0844555	-0.505644	0.135941	0.116931	0.225347	-0.135842	0.432178	-0.265248	-0.0789109	-0.146634	-0.633267	0.130792	0.0859406	-0.234653
-0.243663	-1.45109	3.63327	-0.4	-0.0636634	0.370693	-0.222772	0.0895049	-0.0995049	-0.123465	0.311089	2.53792	0.292871	-0.244752	0.460594	0.23	0.134951	0.0893069	0.209109	-0.0550495	-0.161683	-0.536733	-0.183564	-0.331782	-0.0212871	0.212178	0.29	-0.294653	0.343069	-0.260891	-0.227426	-0.329703	-0.269406	0.0704951	0.0468317	-0.278911
-0.0827723	-1.11941	3.63644	-0.377723	-0.0968317	0.24901	-0.181782	-0.188713	-0.0370297	-0.194356	0.0910891	2.35168	0.116238	-0.126634	0.56703	0.217921	0.164653	0.0577228	0.17604	-0.0132673	-0.195347	-0.482673	0.0682178	-0.206733	-0.108218	0.316139	0.116832	-0.131485	0.313069	-0.568812	-0.425644	-0.24	-0.235644	0.0429703	-0.103762	-0.422277
-0.282178	-1.07614	3.7405	-0.23297	-0.00960396	0.253069	-0.181188	0.0653465	0.18703	-0.206733	0.188317	2.14594	0.330198	-0.190099	0.445743	0.205842	0.322871	0.0174257	0.133267	-0.162178	-0.139307	-0.459703	-0.0211881	-0.491683	-0.139109	0.191683	0.330495	-0.103069	0.344059	-0.349703	-0.359505	-0.391881	0.0981188	0.294158	0.0149505	-0.27495
0.0661386	-0.843168	3.59198	-0.169406	-0.0723762	0.360099	-0.282376	0.070297	0.029802	-0.371287	0.584554	2.1095	-0.0338614	-0.0631683	0.232574	0.0959406	0.454356	0.0177228	0.0722772	-0.120693	-0.14297	-0.587426	-0.149604	-0.277228	-0.107822	0.0772277	0.334851	-0.0424752	0.314951	-0.411287	-0.531782	-0.302871	0.59198	0.0731683	0.0152475	-0.290099
-0.110594	-0.829901	3.80149	-0.147525	-0.104158	0.236238	-0.121683	0.0720792	0.133168	-0.355743	0.269208	1.78832	0.31198	-0.227228	0.0860396	0.212376	0.354059	0.0910891	0.100396	-0.361089	-0.176337	-0.657327	-0.0486139	-0.191485	-0.136832	0.080396	0.188317	-0.103465	0.28495	-0.291089	-0.405941	-0.396238	0.429208	0.104455	-0.168713	-0.404653
-0.318515	-0.628812	3.79812	-0.214257	0.172673	0.183663	-0.0925743	0.0464356	0.196535	-0.0890099	0.395545	1.72356	0.257525	-0.0143564	-0.0380198	0.0420792	0.417129	0.155743	-0.0845545	-0.312772	-0.118812	-0.514752	-0.148911	-0.0470297	-0.0155446	0.145049	0.191683	0.0171287	0.00524752	-0.189604	-0.341584	-0.472673	0.172376	-0.0139604	0.0379208	-0.00891089
-0.174554	-0.518911	3.98624	-0.129802	0.0193069	0.252277	-0.43198	0.11198	0.110891	-0.0141584	0.612475	1.44228	0.325842	0.0389109	-0.0608911	0.190891	0.329604	0.189406	0.194554	-0.0537624	-0.181881	-0.673465	-0.0510891	0.0487129	-0.104653	-0.040297	0.414158	-0.162277	0.288119	-0.059703	-0.426931	-0.318317	0.0190099	-0.13901	0.165149	-0.183366
-0.0708911	-0.376238	3.98812	-0.196337	0.167129	0.199604	-0.0913861	-0.00277228	-0.0456436	0.0425743	0.19604	1.45564	0.272376	0.0351485	-0.463762	0.0878218	0.39495	0.159703	0.0332673	-0.203564	-0.124653	-0.721782	0.00821782	-0.0156436	-0.133366	-0.00564356	0.346634	-0.162574	0.221782	-0.341584	-0.452376	-0.543267	-0.205644	0.362178	0.0335644	-0.167822
-0.21099	-0.305149	3.93376	-0.301584	-0.115446	0.148317	-0.279505	0.150297	0.0172277	-0.0106931	0.407327	1.78307	0.159109	-0.284158	-0.207822	0.0744555	0.119901	0.221188	0.165149	-0.284554	-0.186832	-0.689505	0.0654455	0.160396	0.0879208	0.0986139	0.289109	-0.162574	0.0457426	-0.283069	-0.345941	-0.358812	-0.400297	0.210396	0.133564	0.0683168
-0.141089	-0.133762	4.06277	-0.426238	0.0110891	0.157327	-0.148317	-0.0653465	-0.00910891	-0.0552475	0.331485	1.54198	0.123762	-0.138515	0.120198	0.0923762	0.214257	0.253069	0.124851	-0.154653	-0.308713	-0.669109	0.568515	0.00455446	-0.0408911	-0.060198	0.200693	-0.0719802	0.020099	-0.194356	-0.402574	-0.463465	-0.429307	0.239109	-0.120099	0.0837624
0.0585149	-0.182673	4.1098	-0.24297	0.0361386	0.198416	-0.17901	0.00861386	-0.0644554	-0.07	0.396238	1.39842	0.320594	-0.146535	0.21604	0.00940594	0.0970297	0.164653	0.193267	-0.144158	-0.192376	-0.616832	0.172574	0.00148515	-0.160891	0.13198	0.293762	-0.202376	0.0844555	-0.181584	-0.429505	-0.150594	-0.376139	-0.0743564	-0.0619802	0.158614
-0.152178	-0.165248	3.75644	-0.376634	0.181485	0.238317	-0.368713	0.101683	-0.0276238	-0.0520792	0.230396	1.40673	0.106832	-0.36297	0.50099	0.219505	0.223564	0.105842	0.12703	-0.197624	-0.138317	-0.404851	-0.0459406	0.0281188	-0.069703	0.00445545	0.266931	0.0185148	0.179406	-0.179406	-0.334851	-0.0387129	-0.00267327	-0.0456436	-0.0948515	0.0137624
-0.116931	-0.0947525	3.58871	-0.320594	-0.162574	0.06	-0.249901	0.13604	-0.139505	-0.24505	0.10198	1.36436	0.273366	-0.12	0.414653	0.174951	0.200594	0.0752475	0.100495	-0.0390099	-0.233564	-0.350396	0.0768317	0.115644	-0.0975247	0.135049	0.327921	-0.100198	-0.0347525	-0.178218	-0.581188	-0.294653	0.27396	0.203366	-0.0070297	-0.153564
-0.0792079	0.0129703	3.55317	-0.383366	-0.0787129	0.112376	-0.183564	-0.00960396	-0.132673	-0.167723	0.0945545	1.28109	-0.0995049	-0.0667327	0.386832	0.13198	0.175545	0.0361386	-0.0213861	-0.150693	-0.149109	-0.168416	-0.0147525	0.176238	0.0246535	-0.273069	0.402277	-0.0120792	-0.059505	-0.175743	-0.919307	-0.0517822	0.389604	0.34901	-0.129505	0.0406931
-0.102079	0.019703	3.36317	-0.416436	-0.0843564	-0.257129	-0.227921	-0.00742574	-0.00712871	-0.343168	0.205248	1.22327	0.286436	-0.172871	-0.0491089	0.400594	0.378614	-0.0225743	0.00891089	-0.201683	-0.214752	-0.0586139	0.0765346	0.243465	0.0993069	-0.110891	0.307822	-0.164257	0.00752475	0.135743	-0.947822	-0.217129	0.664356	0.414059	0.21297	-0.00663366
-0.157426	0.218317	3.58624	-0.229208	-0.238119	0.162475	-0.131386	0.118416	-0.157525	-0.138614	0.00405941	1.36218	0.204554	-0.210297	-0.263861	0.137327	0.361881	0.168911	0.00831683	-0.0752475	-0.219703	-0.348416	0.207228	0.171881	0.22396	0.0418812	0.340594	0.0428713	-0.237822	-0.0133663	-0.847228	-0.0636634	0.167525	0.19	0.0244555	-0.0223762
-0.0934654	0.0060396	3.68366	-0.394158	-0.302178	0.0429703	0.0439604	-0.0695049	-0.149208	0.00722772	-0.0346535	1.53505	0.079901	-0.030495	-0.169208	0.405347	0.340198	0.199802	-0.211089	-0.257525	-0.192772	-0.0193069	0.176238	0.301287	0.226436	-0.103564	0.414356	-0.0190099	-0.265049	0.21	-0.664752	-0.157723	0.060099	-0.136832	0.0263366	0.151782
-0.152574	0.173465	3.69733	-0.458119	-0.215842	0.0244555	-0.079703	0.0319802	-0.201188	0.0529703	0.0279208	1.39832	0.0870297	-0.129109	-0.221782	0.302673	0.377921	0.234158	0.0416832	-0.060099	-0.0337624	-0.0851485	0.205644	0.609802	0.168614	-0.191683	0.170495	-0.10901	-0.129505	0.241881	-0.592871	-0.100792	-0.258911	0.0170297	-0.0940594	0.0363366
-0.150396	0.373366	3.64713	-0.119109	-0.131089	-0.0528713	0.00841584	0.0329703	-0.355644	-0.0175247	-0.199505	1.57554	0.0638614	-0.110891	-0.0583168	0.259109	0.606832	0.235446	0.0147525	-0.0816832	-0.222871	0.0940594	0.0469307	0.297624	0.0126733	-0.0345545	0.231683	-0.0505941	-0.222079	-0.0635644	-0.755347	-0.10297	-0.651287	0.232673	-0.123663	0.0780198
-0.120693	0.385446	3.58158	-0.268515	-0.196634	0.0473267	-0.0246535	-0.0651485	-0.0612871	-0.162376	-0.0291089	1.50505	0.128812	-0.280792	-0.0220792	0.468614	0.427723	0.0460396	-0.143069	-0.134257	-0.223564	-0.0773267	0.0473267	0.0742574	0.23297	-0.120198	0.175149	-0.112475	-0.0249505	-0.282673	-0.967228	-0.197624	-0.620495	0.144851	-0.0632673	0.030297
-0.340693	0.407129	3.53535	-0.150099	-0.108515	-0.00118812	0.100693	0.154851	-0.307624	-0.136634	-0.12901	1.37515	-0.0225743	-0.473465	0.174158	0.360594	0.467327	0.177822	0.112475	-0.0371287	-0.162277	-0.060297	0.13604	0.230891	0.174554	-0.245545	0.107327	-0.143663	-0.267228	-0.311782	-1.09881	0.00891089	-0.257624	0.179208	-0.0916832	0.0135644
-0.193168	0.359109	3.38228	-0.120693	-0.291287	0.100891	-0.182772	0.0964356	0.00613861	-0.153267	-0.0492079	1.34525	0.17297	-0.484851	0.522475	0.259703	0.479109	0.019703	0.0561386	-0.00158416	-0.099802	0.0517822	0.0163366	0.288119	0.0483168	-0.241584	0.0485148	-0.145248	-0.23099	-0.310891	-1.07069	-0.0876238	-0.0475247	0.327624	-0.0931683	0.0259406
-0.124455	0.340792	3.59604	-0.120396	-0.144356	0.0213861	-0.0677228	0.158614	0.0392079	-0.238416	-0.179109	1.64723	0.148218	-0.405644	0.409901	0.219208	0.403366	0.0927723	0.120198	-0.174455	-0.188317	0.162574	-0.0458416	0.566832	0.151683	-0.390693	0.0512871	-0.11802	-0.0647525	-0.120594	-1.28287	-0.00128713	0.314356	0.207624	-0.0640594	-0.0969307
-0.0029703	0.222772	3.54228	-0.268911	0.010396	0.123465	-0.132079	0.039802	-0.050495	-0.182673	-0.24802	1.5201	0.18505	-0.549901	0.347921	0.327822	0.697624	0.0968317	0.0332673	-0.0174257	-0.125842	0.07	-0.145842	0.372277	0.213267	-0.0766337	-0.00435644	-0.0887129	0.00237624	-0.268119	-1.19416	-0.00534653	0.347822	0.236733	-0.00623762	-0.050495
-0.0664356	0.213861	3.29525	-0.17802	0.0386139	0.165545	-0.107921	0.100396	0.294752	-0.194356	-0.294257	1.48297	0.129703	-0.18198	0.104356	0.13703	0.581287	0.059901	0.0373267	0.177525	-0.125248	-0.0412871	0.103168	0.250099	0.12297	-0.160198	0.0594059	-0.0293069	0.109505	-0.265347	-1.22356	-0.1	0.708218	0.0132673	-0.290297	-0.0155446
-0.229901	0.375842	3.22139	-0.23802	-0.18505	0.0557426	-0.0532673	0.0750495	0.0756436	-0.207921	-0.262574	1.69733	0.197525	-0.353069	-0.292475	0.218614	0.697426	-0.0860396	-0.0180198	-0.189505	-0.0252475	-0.195049	0.070396	0.337327	0.0532673	-0.156535	0.12505	-0.0308911	-0.0445545	-0.353564	-1.12208	-0.223762	0.574455	0.0739604	-0.0714851	-0.11396
-0.233267	0.328812	3.05178	0.0716832	-0.0291089	0.185347	0.0407921	0.0778218	-0.0431683	-0.0739604	-0.461584	1.73396	0.116535	-0.367327	-0.668119	0.266535	0.524752	-0.0241584	0.0137624	0.069802	0.00356436	-0.029802	-0.0824752	0.275446	-0.00772277	-0.0921782	0.12901	-0.0923762	0.0525743	-0.293861	-1.18327	-0.200495	-0.0192079	0.0754455	-0.0139604	0.080099
-0.301386	0.502772	3.06683	0.381683	-0.0337624	0.0752475	-0.185644	-0.0508911	-0.203762	0.0155446	-0.0284158	2.00772	0.15703	-0.409703	-0.382871	0.194752	0.41297	-0.0551485	0.0153465	-0.232475	-0.217129	-0.33297	0.19495	0.393069	-0.0383168	-0.31	0.134554	-0.0914852	0.06	-0.382871	-1.34198	-0.145545	-0.273564	0.0750495	-0.0764356	0.112871
-0.177228	0.529208	2.66653	0.263564	-0.00742574	0.336634	-0.190594	0.0524753	0.138416	0.150693	-0.134554	1.92525	0.197228	-0.170495	-0.189208	-0.00950495	0.504257	-0.14297	0.107822	-0.125644	-0.0993069	-0.26901	0.221188	0.268119	-0.101386	-0.182871	-0.110198	-0.123663	0.069604	-0.351089	-1.06317	-0.119604	-0.438515	0.0419802	-0.110099	-0.0368317
-0.185248	0.636238	2.49723	0.235446	-0.0407921	-0.0649505	-0.136139	0.0252475	0.328416	0.166832	-0.111386	2.04396	0.0868317	-0.375644	0.00455446	-0.0233663	0.272178	-0.0826733	0.0793069	-0.249406	0.0894059	-0.165049	-0.346832	0.133861	-0.103861	-0.139703	0.0569307	-0.0649505	0.0783168	-0.538911	-1.12248	-0.0335644	-0.506931	-0.0193069	-0.0822772	-0.110891
-0.323861	0.445644	2.12733	0.167228	-0.204455	0.103465	-0.201683	0.117723	0.170297	0.0354455	-0.147525	2.17327	-0.0344554	-0.262079	0.319208	0.0348515	0.35099	-0.142079	0.0808911	-0.21198	0.117624	-0.543168	-0.0467327	0.169208	-0.167327	0.0164356	0.0630693	-0.155248	0.0847525	-0.38198	-1.12248	-0.0692079	-0.263465	0.0406931	0.137723	0.0163366
-0.526238	0.625149	1.94109	0.137822	-0.0481188	0.0830693	-0.368218	0.120495	0.113366	0.110891	-0.0833663	2.36168	-0.0280198	-0.304158	0.486337	0.0224752	0.314851	-0.0533663	-0.00782178	-0.0451485	0.0857426	-0.504455	-0.243762	-0.0510891	-0.268515	-0.165842	-0.0210891	0.0232673	-0.0256436	-0.726634	-1.1803	-0.104158	-0.299307	0.00920792	-0.140792	-0.0177228
-0.437426	0.645545	1.81723	0.138416	0.0688119	0.0507921	-0.15505	0.0604951	0.0564356	0.00851485	-0.161188	2.37198	-0.136832	-0.283762	0.361287	-0.0287129	0.425842	-0.141188	-0.166238	-0.0661386	-0.0070297	-0.505644	-0.148713	-0.0238614	-0.171287	-0.0617822	0.106337	0.119901	-0.118911	-0.386931	-1.11941	0.142178	-0.0845545	-0.0232673	-0.141386	-0.0566337
-0.270693	0.548119	1.72901	0.270594	0.0667327	-0.030495	-0.0727723	-0.0070297	0.0289109	-0.0632673	-0.230693	2.62723	-0.00782178	-0.325248	0.274356	0.240495	0.64	0.00752475	0.0830693	0.0582178	0.0761386	-0.506634	-0.225842	0.0320792	-0.144752	-0.115644	-0.229307	0.0604951	0.0509901	-0.418218	-0.958416	-0.0112871	0.35297	0.0929703	0.00920792	-0.196535
-0.436139	0.441683	1.64356	0.393069	0.13396	-0.11	-0.110891	0.125149	0.0310891	-0.114752	-0.268416	2.41743	0.192376	-0.151089	-0.00188119	-0.2	0.250099	0.0365347	-0.00633663	0.164752	0.0386139	-0.78703	-0.200792	0.117129	-0.248515	-0.110396	-0.165941	0.089604	-0.100891	-0.480396	-0.956832	-0.0175247	0.43802	0.0317822	-0.110792	-0.0151485
-0.418218	0.475743	1.5297	0.395842	-0.0289109	-0.199703	-0.176139	-0.0029703	0.0647525	-0.185545	-0.40802	2.72396	-0.0820792	-0.167129	-0.0972277	0.130099	0.399505	0.0659406	0.0517822	-0.0490099	-0.0279208	-0.656733	-0.385446	0.113069	-0.122574	-0.0726733	-0.101881	0.0890099	0.200297	-0.513861	-0.734752	-0.0252475	0.520891	0.0314852	-0.11297	-0.126238
-0.311782	0.589604	1.17079	0.177327	-0.0941584	-0.0309901	-0.0925743	-0.0290099	0.12604	-0.00544554	-0.597921	2.76178	0.206634	-0.154752	-0.340099	0.150792	0.480198	-0.215347	-0.0785148	0.0468317	0.0565346	-1.00238	-0.392178	0.111287	-0.00752475	-0.0974257	-0.320396	0.17901	-0.00792079	-0.884455	-0.571386	-0.250594	0.0224752	0.410198	-0.174851	-0.229208
-0.324158	0.743465	1.12941	0.149802	-0.197228	-0.0219802	-0.189406	0.134059	-0.0217822	-0.0756436	-0.577228	2.85861	0.0877228	-0.390198	-0.333663	0.139901	0.500891	0.0317822	0.020297	0.272178	-0.0408911	-1.0902	-0.180792	0.176337	-0.010396	-0.0615842	0.0029703	0.118713	-0.18802	-0.855743	-0.791386	-0.324356	-0.0571287	0.159505	-0.0858416	-0.276535
-0.149604	0.709406	0.991386	0.277921	-0.102475	0.0770297	-0.0359406	0.00405941	-0.176832	0.164752	-0.404059	2.79208	0.12604	-0.217228	-0.167228	-0.115644	0.301287	0.15901	0.0763366	0.188119	0.142574	-1.2696	-0.127822	0.142277	-0.0440594	-0.15604	-0.0651485	0.146535	0.040099	-0.828218	-0.317327	-0.138416	-0.252376	-0.160792	-0.175842	-0.10198
-0.388119	0.733168	0.915842	0.367327	-0.0771287	0.155347	-0.111881	-0.0852475	0.108713	0.0248515	-0.472178	2.90584	0.137129	-0.393366	-0.188911	-0.243366	0.482277	0.24901	-0.175446	0.283366	0.0957426	-1.26871	-0.354951	0.00920792	0.0134653	-0.0792079	-0.0639604	0.0837624	-0.141287	-0.668218	-0.313267	-0.115248	-0.408911	-0.0619802	-0.175545	-0.306832
-0.432079	0.948515	0.904059	0.366436	-0.113366	-0.0844555	-0.177426	0.197822	0.0510891	0.205644	-0.48	3.18713	0.0558416	-0.408911	0.351287	-0.279901	0.504851	0.245644	-0.150396	0.536436	0.128317	-1.36446	-0.172376	-0.0563366	0.010396	-0.0136634	0.0366337	0.0134653	0.118317	-0.75604	-0.550792	-0.0190099	-0.295743	0.0873267	-0.176733	-0.200792
-0.391287	0.765644	0.871287	0.465842	-0.11802	0.104158	-0.215842	-0.0512871	0.140792	0.165347	-0.489307	2.90119	-0.0924752	-0.455644	0.331188	-0.165446	0.39802	0.216337	-0.0259406	0.441089	0.151188	-1.45109	-0.121386	0.090198	0.0754455	0.0227723	-0.0215842	0.0834653	0.0960396	-0.66604	-0.39802	-0.186436	-0.00950495	-0.0639604	-0.247129	-0.365941
-0.52901	0.883168	0.899802	0.304356	-0.0629703	0.0827723	-0.251683	0.00712871	0.20198	0.0560396	-0.469901	3.02337	-0.113465	-0.601782	0.398911	-0.142574	0.521485	0.0941584	0.119505	0.26604	0.0740594	-1.47772	-0.258515	0.218416	-0.0889109	-0.100099	-0.183366	0.173762	0.385347	-0.639802	-0.516139	-0.00514851	0.104951	-0.0336634	-0.179604	-0.321089
-0.428119	0.764356	1.23208	0.395842	0.0507921	0.191089	-0.316535	-0.14198	0.141683	-0.324851	-0.319505	3.01277	0.147327	-0.707228	0.253861	-0.270594	0.726535	0.0925743	-0.0670297	0.331287	0.0656436	-1.53376	-0.294653	0.0247525	-0.153861	-0.0245545	-0.152772	0.273465	0.274356	-0.632871	-0.63495	0.0749505	0.570891	-0.0611881	-0.212079	-0.425248
-0.444851	0.916832	1.23485	0.278317	-0.133564	0.0106931	-0.173663	-0.0213861	0.268812	-0.175941	-0.234158	3.07386	0.0350495	-0.571386	-0.0594059	-0.247723	0.603168	0.050396	-0.0141584	0.145248	0.0272277	-1.62069	-0.362376	-0.0976238	-0.100099	-0.0907921	-0.152475	0.143762	0.0205941	-0.486238	-0.515545	0.0356436	0.470594	-0.0911881	-0.0933663	-0.128218
-0.392871	0.680198	1.42238	0.370495	-0.139802	-0.111287	-0.300495	-0.108911	0.239109	0.0216832	-0.271881	3.0696	0.0146535	-0.428416	-0.333762	-0.223267	0.688218	-0.0414851	0.0108911	0.176733	-0.164851	-1.6204	-0.399505	0.0211881	-0.106634	-0.0870297	-0.21396	0.175049	0.18802	-0.387822	-0.411881	-0.0617822	0.538713	-0.160297	-0.0954455	-0.0221782
-0.384257	0.833564	1.30228	0.402376	-0.113861	-0.0335644	-0.127624	-0.0770297	0.138515	-0.0160396	-0.427129	3.21406	0.0545545	-0.341386	-0.355149	-0.290099	0.524455	-0.133069	0.0341584	0.279901	-0.175347	-1.27703	-0.470396	0.0204951	-0.17198	-0.0823762	-0.317327	0.0175247	0.102079	-0.637822	-0.410099	-0.0410891	0.345248	-0.342178	0.0313861	-0.341386
-0.500297	0.84	1.18594	0.433663	-0.339109	0.00534653	-0.0659406	0.0144554	0.0785148	0.0049505	-0.623564	3.22139	0.00346535	-0.356238	-0.375842	-0.145049	0.492574	-0.0430693	0.0907921	0.225545	-0.0664356	-1.23386	-0.17	-0.127921	-0.179406	-0.039901	-0.187624	0.0572277	0.199505	-0.546832	-0.378911	0.0111881	-0.315347	-0.286238	0.0913861	-0.221287
-0.548614	0.728614	1.32208	0.502475	-0.122574	-0.0172277	-0.102475	-0.104257	0.265149	0.187228	-0.632574	3.29881	0.0136634	-0.311386	-0.251287	-0.241188	0.460396	-0.324356	0.0246535	0.319307	-0.238515	-1.1705	-0.428713	-0.0379208	-0.214653	-0.257822	-0.221386	0.0176238	0.205049	-0.447723	-0.189901	-0.0543564	-0.347822	-0.0928713	0.149208	-0.171188
-0.49901	0.616931	1.36861	0.472475	-0.229703	-0.010099	0.00821782	-0.0711881	0.232673	0.209109	-0.548416	3.41059	-0.108218	-0.518416	-0.145149	-0.339208	0.577624	-0.0456436	-0.069604	0.295248	0.0394059	-0.826436	0.0050495	0.0248515	-0.0986139	0.0268317	-0.164158	0.147327	0.148218	-0.47901	-0.338911	0.25099	-0.409703	-0.121881	0.179208	-0.237624
-0.767921	0.65802	1.25564	0.530297	-0.385842	0.0279208	-0.0882178	-0.130891	0.159604	0.260099	-0.584653	3.58069	-0.0383168	-0.372376	0.452574	-0.195644	0.733267	-0.0178218	-0.0133663	0.360495	-0.224158	-0.410198	-0.186535	0.124554	-0.132673	0.11802	-0.198812	0.019802	0.15198	-0.510297	-0.186733	-0.196139	-0.848812	-0.312475	0.0273267	-0.244752
-0.504554	0.448515	1.23921	0.470693	-0.241683	-0.0927723	-0.0943564	0.0915842	-0.0540594	0.132376	-0.588911	3.55564	0.0440594	-0.486931	0.397228	-0.173762	0.596436	-0.108416	-0.0467327	0.206337	-0.236238	-0.273366	-0.283663	-0.0957426	-0.138515	0.182376	-0.233168	0.120099	0.125149	-0.53901	-0.305149	0.049901	-0.441881	-0.124257	-0.0426733	-0.381287
-0.404059	0.589406	1.32218	0.561584	-0.216337	-0.0559406	-0.070198	-0.155644	0.0628713	-0.0341584	-0.535446	3.44327	0.0132673	-0.403564	0.376535	-0.140297	0.532376	-0.0811881	-0.0807921	0.312277	-0.247129	-0.103168	-0.295743	0.0242574	-0.204455	0.0351485	-0.268416	0.0218812	0.320099	-0.629604	-0.460792	0.238614	0.089703	-0.126733	-0.223861	-0.415644
-0.393564	0.512079	1.27455	0.472178	-0.252871	0.019604	-0.264257	0.0662376	-0.0310891	-0.192475	-0.512871	3.38911	-0.0365347	-0.328119	0.163663	0.00475248	0.45802	-0.24396	-0.154554	0.319406	-0.361683	-0.123267	-0.305644	0.155743	-0.34	0.260099	-0.242475	-0.0684158	0.162277	-0.541485	-0.386535	0.264554	0.399109	0.0248515	0.147921	-0.424851
-0.592178	0.335149	1.25911	0.432178	-0.189703	0.0852475	-0.138812	0.0275248	-0.0353465	-0.230495	-0.420297	3.52743	-0.0895049	-0.311386	0.173267	0.0892079	0.795545	-0.117426	0.00148515	0.546238	-0.214356	0.00881188	-0.196436	0.0563366	-0.155644	0.0694059	-0.216436	0.0621782	0.223861	-0.470297	-0.385941	0.11297	0.526634	0.0285149	0.239208	-0.711386
-0.521386	0.407525	1.28426	0.400297	-0.357525	0.0883168	-0.362574	-0.0324752	-0.167228	-0.0895049	-0.427129	3.60663	0.170396	-0.416634	-0.170198	-0.224554	0.513663	-0.121485	0.0278218	0.333366	-0.446733	-0.102277	-0.0435644	-0.0029703	-0.100891	0.16099	-0.191386	0.0912871	0.285347	-0.597822	-0.574752	-0.050198	0.0578218	0.0925743	0.152574	-0.437921
-0.572376	0.331485	1.15465	0.401881	0.0444555	0.00455446	-0.116535	-0.280297	-0.0715842	-0.216931	-0.315248	3.40802	0.179109	-0.342475	-0.192772	-0.0680198	0.541485	-0.00306931	-0.00683168	0.34198	-0.369703	-0.0339604	-0.181881	0.0276238	-0.224653	0.0449505	-0.32604	0.0230693	0.162475	-0.405644	-0.35198	0.00891089	0.365743	-0.158614	0.0921782	-0.412871
-0.724653	0.152277	1.1497	0.402178	-0.213267	-0.12297	0.00376238	-0.28	-0.235049	-0.133762	-0.473663	3.1397	0.0981188	-0.387624	-0.303861	-0.321485	0.538713	-0.0633663	-0.100891	0.377822	-0.382079	-0.0209901	-0.282673	0.160099	-0.198119	-0.0841584	-0.292475	0.0245545	0.160594	-0.521287	-0.309208	-0.212871	-0.0767327	-0.339901	-0.0988119	-0.354356
-0.647525	0.175842	1.27881	0.622178	0.149307	-0.0574257	-0.0871287	-0.0878218	-0.18099	0.05	-0.29099	3.18891	0.166733	-0.373663	-0.206139	-0.234554	0.478119	-0.0655445	-0.0127723	0.257723	-0.42198	0.182574	-0.261584	0.00475248	-0.143069	0.0165347	-0.399208	0.15703	0.250297	-0.604158	-0.245446	-0.0853465	-0.300792	-0.247723	-0.010396	-0.390297
-0.64099	0.0312871	0.969703	0.315545	-0.166931	0.167228	-0.0584158	-0.115941	0.00188119	-0.0864356	-0.560198	2.97871	0.206931	-0.508515	0.112574	-0.265149	0.698812	-0.0968317	-0.265545	0.266733	-0.304356	0.0477228	0.0679208	-0.0530693	-0.148713	0.16901	-0.435743	0.070099	0.159307	-0.543564	-0.123267	-0.0291089	-0.395149	-0.403663	-0.0125743	-0.703762
-0.943564	-0.0438614	1.01277	0.0968317	-0.0527723	0.171881	-0.090297	-0.144455	-0.00019802	0.0354455	-0.309208	2.11703	0.0277228	-0.43802	0.030297	-0.136337	0.538218	-0.320891	-0.140198	0.184752	-0.228614	0.030099	-0.253861	0.0978218	-0.212178	0.0505941	-0.381881	-0.117426	0.162079	-0.515446	0.00990099	-0.0649505	-0.396931	-0.151188	0.144951	-0.45901
-0.847723	0.16099	0.858911	0.156535	-0.0180198	0.0565346	-0.188416	0.109208	0.18396	-0.250693	-0.227525	1.41465	0.135743	-0.546535	0.227426	-0.170099	0.47099	-0.0742574	-0.241782	0.132772	-0.182277	0.262772	-0.324455	0.0118812	-0.216238	0.0814852	-0.50901	-0.215842	0.191782	-0.386436	-0.0473267	-0.0090099	-0.204455	-0.237723	0.111584	-0.524257
-0.87099	0.0146535	0.933861	-0.0315842	-0.0963366	0.242376	-0.149604	-0.0183168	0.0811881	-0.166535	-0.115941	0.489901	0.176832	-0.533465	0.325743	-0.173465	0.724059	-0.32802	-0.273069	0.141683	-0.164059	0.146733	-0.217723	0.0143564	-0.130297	0.0507921	-0.32703	0.104851	0.251188	-0.0786139	0.146931	-0.0173267	0.209901	-0.039703	0.108218	-0.658614
-0.734158	-0.0626733	0.914059	0.131485	-0.103762	0.0670297	0.00039604	-0.135545	0.240594	-0.0420792	0.00356436	0.0279208	0.0870297	-0.403267	0.461386	-0.17901	0.60505	-0.201683	-0.335248	-0.0417822	-0.239505	0.293465	-0.260396	0.240198	-0.162475	-0.0119802	-0.30604	-0.0251485	0.190891	-0.00772277	0.210693	0.0764356	0.423267	-0.0962376	0.0754455	-0.53297
-1.03614	-0.0809901	0.554851	0.230594	-0.079604	0.133168	-0.192673	0.117228	0.178812	-0.118515	-0.0669307	-0.235644	0.196931	-0.352178	0.309109	-0.0333663	0.640594	-0.484752	-0.246139	0.37901	-0.253762	0.370495	-0.182772	0.0554455	-0.135545	0.197129	-0.164653	0.0754455	0.131485	-0.0395049	0.255941	0.190495	0.303267	-0.133762	0.194455	-0.568812
-0.905644	-0.0389109	0.225941	-0.0291089	-0.0448515	0.0793069	-0.0673267	-0.069703	0.211584	-0.0949505	0.0124753	-0.662574	0.174356	-0.281386	-0.184752	-0.189505	0.644257	-0.557921	-0.21802	0.168614	-0.357129	0.294455	-0.122079	0.117921	-0.108911	0.0462376	-0.292673	0.0760396	0.192178	-0.260099	0.319307	0.242475	0.496634	-0.164653	0.220693	-0.603762
-0.991089	-0.0872277	0.498614	0.04	0.0674257	-0.104752	-0.0113861	-0.127822	0.0821782	0.059505	-0.0589109	-0.717723	-0.0679208	-0.208713	-0.300099	-0.107525	0.488317	-0.402871	-0.279208	0.265347	-0.400396	0.218614	0.0180198	0.0625743	-0.234851	0.167228	-0.269208	0.0766337	0.0305941	-0.10099	0.354257	0.0257426	0.148416	-0.384059	0.218515	-0.652178
-0.924653	-0.10396	0.573762	0.101584	-0.0305941	0.0620792	-0.0722772	-0.124356	0.112871	-0.00574257	0.270594	-0.931287	0.278911	-0.438812	-0.297327	-0.202475	0.422673	-0.216634	-0.122277	0.246436	-0.38495	0.204653	-0.175248	-0.0233663	-0.121089	0.0788119	-0.18604	0.0369307	0.157822	0.116832	0.490792	-0.0489109	-0.103465	-0.060396	0.12604	-0.655842
-0.729703	-0.119802	0.499505	0.0165347	-0.0670297	0.0283168	-0.298119	0.127129	0.142277	0.0194059	0.113861	-1.04584	-0.0561386	-0.0267327	-0.111782	-0.117426	0.245446	-0.162178	-0.444455	0.223267	-0.341089	0.159802	-0.0338614	0.10396	-0.15604	0.0182178	-0.282277	0.0382178	0.126535	0.0462376	0.433564	-0.0222772	-0.353168	0.0907921	0.0610891	-0.688911
-0.68198	-0.165545	0.61495	0.0211881	-0.0428713	-0.0542574	-0.142079	-0.060396	-0.00405941	0.0466337	0.0351485	-1.0603	0.160693	-0.322871	-0.165941	-0.186733	0.369802	-0.269307	-0.315743	0.0719802	-0.47604	0.266436	-0.66901	-0.0107921	-0.28099	0.266337	-0.230396	0.0792079	0.0565346	-0.133762	0.661881	0.135248	-0.881089	0.0019802	0.11802	-0.593465
-0.617624	-0.150693	0.290693	0.174951	0.0106931	-0.139901	-0.175743	-0.117921	0.059901	0.133861	-0.0029703	-0.898218	0.0459406	-0.251782	0.218416	-0.135149	0.373564	-0.275149	-0.28604	0.147525	-0.278119	0.104653	-0.34505	-0.00653465	-0.0375248	0.196733	-0.296931	0.0831683	0.0537624	-0.385049	0.699307	0.262376	-0.436139	0.164455	0.145842	-0.59901
-0.669604	0.0526733	0.653663	-0.0719802	0.0919802	-0.173663	-0.089703	0.00455446	-0.188614	0.0116832	-0.0409901	-1.01614	0.110594	-0.268515	0.595842	-0.143465	0.308812	-0.211287	-0.476931	0.30396	-0.250891	0.150099	-0.416139	0.03	-0.0433663	0.229802	-0.243465	0.115941	-0.00871287	-0.0753465	0.427921	0.260495	-0.183366	-0.0243564	-0.00445545	-0.632079
-0.536238	-0.271485	0.578515	-0.00831683	-0.0641584	-0.127129	-0.0355446	-0.0523762	-0.126139	-0.049604	0.0816832	-0.972178	0.175545	-0.284257	0.57396	-0.149307	0.381584	-0.315347	-0.48	0.192376	-0.20297	0.0049505	-0.489802	-0.155941	-0.179604	0.300396	-0.222376	0.020198	-0.0720792	-0.289307	0.406535	0.285842	-0.151485	-0.0834653	0.174356	-0.485743
-0.692475	-0.00722772	0.653069	-0.124356	0.0214852	-0.120396	0.212277	-0.020198	-0.126139	-0.0823762	0.284851	-0.838812	0.059901	-0.331881	0.670099	-0.124653	0.477426	-0.250297	-0.324059	0.0725743	-0.217525	0.179208	-0.192772	-0.332574	-0.215446	0.231683	-0.448317	0.245743	-0.0189109	-0.29	0.536337	0.213663	0.379406	0.0117822	0.0509901	-0.547822
-0.686337	-0.0238614	0.68099	-0.029703	-0.0744555	-0.0548515	0.31099	-0.0181188	-0.277624	0.0939604	0.244653	-0.554554	0.0945545	-0.318911	0.39604	-0.0968317	-0.0591089	-0.296535	-0.326832	0.0527723	-0.291485	0.10802	-0.304554	-0.0186139	-0.308515	0.230792	-0.358218	0.22099	-0.17297	-0.35	0.560495	0.0314852	0.444059	0.26604	-0.262178	-0.392475
-0.489505	-0.101485	0.920792	0.00613861	-0.108416	-0.149208	0.309406	-0.0747525	-0.377624	0.030198	0.422871	-0.955149	0.160396	-0.0149505	0.0319802	0.147327	0.135545	-0.229406	-0.329307	0.22396	-0.275446	0.245347	-0.348218	0.0172277	-0.371287	0.271188	-0.207228	0.357228	-0.0279208	-0.070297	0.545941	0.276238	0.547426	0.239406	-0.0171287	-0.496436
-0.601188	-0.0278218	0.854257	0.0513861	-0.115248	-0.265248	0.365743	0.11802	-0.497327	0.0555445	0.160495	-1.13337	0.161683	-0.00217822	-0.0905941	-0.0126733	0.358713	-0.232871	-0.332079	0.232079	-0.361485	0.0229703	-0.292079	-0.0757426	-0.254653	0.0214852	-0.287822	0.262178	-0.179406	-0.321881	0.490396	-0.00623762	0.365446	0.307129	-0.0626733	-0.620198
-0.34198	-0.0145545	0.878911	-0.0139604	0.0561386	-0.259406	0.233267	0.120198	-0.495545	0.242178	-0.0130693	-0.944653	0.166634	0.00930693	-0.453168	-0.0151485	0.613069	-0.430297	-0.397327	0.0822772	-0.523267	-0.150693	-0.377228	-0.099604	-0.168713	0.331485	-0.389604	0.208614	-0.37396	-0.268416	0.698614	-0.169901	0.308614	0.157327	-0.0282178	-0.444851
-0.464653	0.00089109	0.88396	-0.160594	-0.0134653	-0.344455	0.168911	0.0532673	-0.404851	-0.0123762	-0.0266337	-1.12465	0.110891	-0.00980198	-0.0145545	-0.0464356	0.399604	-0.125644	-0.34198	-0.0650495	-0.478119	0.0541584	-0.390495	0.00811881	-0.232475	-0.108218	-0.177327	0.215743	-0.439208	-0.454356	0.844059	-0.0811881	0.184158	0.204752	-0.0715842	-0.411287
-0.29198	-0.203663	1.10238	-0.0349505	0.0394059	0.0319802	0.167723	0.0250495	-0.34703	0.326436	0.0608911	-1.09594	0.0845545	0.00415842	-0.0655445	-0.361089	0.273663	-0.190297	-0.285347	0.0455446	-0.359505	0.0968317	-0.372871	0.106238	-0.0481188	0.0814852	-0.316931	0.221881	-0.381386	-0.116535	0.746337	-0.0111881	-0.277525	-0.00881188	-0.0768317	-0.414653
-0.341485	-0.337624	1.51297	0.069703	-0.279505	-0.151188	0.32495	0.215644	-0.305149	0.234554	0.0506931	-1.02851	-0.00207921	0.147129	0.250693	-0.308515	0.371782	-0.255248	-0.414653	0.059802	-0.471584	0.241386	-0.31802	0.113069	-0.181584	0.0814852	-0.196238	0.258713	-0.384752	-0.29901	0.828911	-0.00871287	-0.358812	-0.222574	-0.201386	-0.521485
-0.30099	-0.379406	1.73663	-0.0253465	-0.0959406	-0.176238	0.260891	-0.00069307	-0.18297	0.354257	-0.0910891	-1.15069	0.0631683	0.0310891	0.170594	0.0628713	0.258911	-0.198416	-0.421485	0.0459406	-0.573267	0.285545	-0.460693	0.0589109	-0.306931	0.0811881	-0.234257	0.172079	-0.295347	-0.270495	0.599406	0.302871	0.121089	0.0957426	-0.115644	-0.494653
-0.219901	-0.364554	1.77188	-0.0178218	-0.293069	-0.0691089	0.217525	0.00118812	-0.270198	0.323663	-0.102871	-0.968515	0.155941	0.264752	0.337129	-0.13396	0.224752	-0.201485	-0.527327	0.118614	-0.364356	0.300693	-0.343366	0.00564356	-0.370594	0.271782	-0.403168	0.238317	-0.297525	-0.240495	0.652277	0.141584	0.323861	0.0119802	-0.181287	-0.119604
-0.458812	-0.437822	2.12871	-0.162277	-0.019901	-0.134752	0.252277	0.192376	-0.267129	0.140495	-0.0856436	-0.875347	0.18802	0.185842	0.402673	-0.080198	0.361584	-0.236139	-0.312574	0.0695049	-0.595545	0.374951	-0.355743	0.224257	-0.287426	0.141782	-0.472475	0.185446	-0.265644	-0.302079	0.465149	0.27099	0.613465	-0.0814852	-0.0562376	-0.125446
-0.257426	-0.364455	2.30386	-0.0654455	-0.213366	-0.0582178	0.208317	0.161188	-0.364356	0.0958416	-0.214257	-0.757228	0.191683	0.136634	0.321386	-0.117921	0.300198	-0.270099	-0.381782	0.141287	-0.356733	0.359505	-0.398119	-0.0793069	-0.324257	-0.227525	-0.421485	0.253267	-0.295644	-0.46604	0.457426	0.202178	0.90495	0.274752	0.029802	-0.0412871
-0.245743	-0.49901	2.3499	0.00138614	0.00267327	-0.0544555	0.275842	0.0623762	-0.260297	0.0909901	-0.104158	-0.728713	-0.0567327	0.177723	0.228515	-0.305941	0.337624	-0.345149	-0.448911	-0.0688119	-0.34099	0.565941	-0.413861	0.0259406	-0.241683	0.0517822	-0.620198	0.288218	-0.296931	-0.396436	0.48	0.0255445	0.60297	-0.070297	-0.103267	0.143762
-0.204257	-0.61505	2.53119	0.0391089	-0.0344554	0.0395049	0.270594	-0.0882178	-0.228416	0.307525	-0.0421782	-0.743564	0.135149	0.231287	-0.0156436	-0.0349505	0.34505	-0.160396	-0.207228	0.00356436	-0.325545	0.59297	-0.209604	-0.0973267	-0.119703	-0.0495049	-0.499109	0.133168	-0.447525	-0.247327	0.593564	0.203366	0.453564	0.00712871	0.0245545	-0.10901
0.159703	-0.378713	2.68525	-0.134455	-0.0405941	-0.0842574	0.196535	0.0626733	-0.105941	-0.00772277	-0.216634	-0.437525	-0.0126733	0.174653	-0.157327	-0.0148515	0.200297	-0.0647525	-0.314951	0.0156436	-0.211584	0.294851	-0.225644	-0.00148515	-0.040198	0.20198	-0.448713	0.0468317	-0.516238	-0.338911	0.588911	-0.0060396	0.24505	0.0123762	0.0221782	-0.0558416
-0.179505	-0.67297	2.65	0.0516832	-0.0207921	-0.0371287	0.195049	-0.0258416	-0.137525	0.209505	-0.139307	-0.294257	-0.141089	0.0983168	-0.179901	0.0686139	-0.0141584	-0.168218	-0.19396	0.0565346	-0.196139	0.576238	-0.239208	0.223168	-0.020099	-0.19802	-0.548614	0.241485	-0.572277	-0.270198	0.835149	0.0236634	-0.119109	0.228614	0.14099	-0.0325743
-0.0390099	-0.688713	3.04842	-0.0604951	-0.0557426	0.119703	0.383564	0.0338614	-0.104752	0.0776238	-0.0819802	-0.40099	-0.106733	0.332277	0.0681188	0.120891	0.329604	-0.0444555	-0.232673	0.0689109	-0.242871	0.597921	0.151188	0.19901	-0.11901	-0.050198	-0.626931	0.184851	-0.601089	-0.240198	0.640495	-0.0772277	-0.300792	0.27604	-0.0384158	0.341584
0.00277228	-0.796634	3.2103	-0.113663	-0.0019802	0.126238	0.163564	-0.0258416	-0.133465	0.0148515	-0.193465	-0.247426	-0.0464356	0.255842	0.326832	-0.0377228	0.30396	-0.0782178	-0.182574	0.0806931	-0.32703	0.654455	-0.019604	0.174257	0.00415842	-0.00772277	-0.53495	0.0319802	-0.408614	-0.020198	0.636535	-0.00821782	-0.260594	0.153465	-0.141188	0.114851
0.292673	-0.693069	3.34277	-0.0155446	-0.0681188	-0.0578218	0.290495	-0.0258416	-0.223465	0.114455	-0.235842	-0.173564	-0.0039604	-0.0690099	0.409208	0.0138614	0.181386	-0.0222772	-0.131881	0.0942574	-0.213663	0.847228	-0.0619802	-0.039802	-0.0738614	-0.224653	-0.511782	0.0965346	-0.53703	0.069802	0.486535	0.0486139	-0.00445545	0.218713	-0.262376	0.35901
0.0950495	-0.864158	3.50673	-0.00653465	-0.106535	0.107426	0.288713	0.255446	-0.136535	0.0132673	-0.11604	-0.151584	-0.29297	-0.215446	0.54099	-0.0842574	0.18604	-0.126337	-0.14297	0.0147525	-0.20099	0.971287	-0.324257	0.154851	0.109307	0.209307	-0.548515	0.161188	-0.15604	-0.0817822	0.425941	0.167624	0.314257	0.328317	-0.204257	0.750594
0.228614	-0.762079	3.57228	-0.246634	-0.0246535	0.173267	0.255644	0.0654455	-0.169604	-0.0513861	0.0840594	-0.482079	-0.104257	-0.231188	0.682178	0.029901	0.250693	0.190891	-0.0234653	0.214653	-0.0873267	0.916535	-0.146931	0.161584	0.0115842	-0.127624	-0.406535	0.0145545	-0.562277	-0.11396	0.353069	0.0457426	0.51604	0.367327	-0.297624	0.873762
0.212178	-0.97	3.76941	-0.239109	-0.121782	0.030396	0.252574	0.0379208	-0.141386	-0.0566337	0.0753465	-0.0544555	-0.133663	0.195545	0.500198	-0.00752475	0.536832	-0.0328713	0.0847525	0.0961386	-0.103465	0.863069	-0.217129	0.13901	0.0637624	0.0070297	-0.313267	0.0776238	-0.250693	0.0725743	0.293069	0.235446	0.777723	0.188416	0.0139604	0.956337
0.134851	-0.921089	3.96554	-0.200792	-0.219505	-0.0336634	0.180792	-0.0214852	-0.262574	-0.0321782	0.169505	0.0850495	0.0247525	0.240396	0.169208	-0.0140594	0.484257	-0.0375248	-0.0495049	0.108812	-0.218317	0.54802	-0.198218	0.144851	0.115049	-0.240495	-0.450099	0.171386	-0.49703	0.0413861	0.423069	0.192376	0.821089	0.362673	-0.0139604	0.944851
0.178119	-0.824356	4.00139	-0.0643564	-0.0488119	0.162871	0.175545	-0.0508911	-0.204455	-0.12901	0.252673	0.372376	-0.0439604	0.412772	-0.290891	-0.0224752	0.326436	-0.0705941	-0.00039604	0.03	-0.234455	0.743267	-0.116832	0.020396	0.0482178	-0.0871287	-0.136931	0.0857426	-0.393069	0.0376238	0.450891	0.0080198	0.95604	0.182871	0.0454455	1.06554
0.099901	-0.786634	4.53574	-0.309406	-0.0834653	0.139703	0.272178	-0.0839604	-0.365347	0.0135644	0.438317	0.385446	-0.192376	0.146337	-0.250396	-0.0593069	0.612871	0.117228	0.0481188	0.160198	-0.282178	0.751584	0.0347525	0.156832	-0.0170297	-0.204356	-0.302871	0.0878218	-0.32901	-0.0229703	0.449604	-0.155149	0.647129	0.381188	-0.0463366	1.24752
0.301881	-0.991782	4.61	0.00920792	-0.120891	0.174356	0.330594	0.194752	-0.237228	-0.0244555	0.122772	0.488416	-0.162376	0.348713	-0.0792079	-0.290099	0.396931	0.0137624	0.0948515	0.171386	-0.32802	0.759604	-0.137921	0.134257	0.126733	-0.333762	-0.18901	0.151782	-0.234951	-0.0548515	0.290297	-0.157327	0.125149	0.258614	-0.0209901	1.14158
0.345545	-0.924951	4.64465	-0.172178	-0.0936634	0.151485	0.207822	0.0641584	-0.268515	-0.00277228	0.338515	0.718119	-0.161782	0.33297	-0.0690099	-0.049703	0.370693	-0.0493069	0.114059	0.121287	-0.34604	0.770693	-0.0775248	0.0392079	0.030495	-0.141287	-0.124653	0.0370297	-0.32	-0.248515	0.379703	-0.128515	0.0740594	0.325149	-0.154455	1.13604
0.079802	-0.95	4.70426	-0.0753465	0.0295049	0.0432673	0.0166337	-0.0858416	-0.0791089	-0.0111881	0.299802	0.904653	-0.320495	0.0360396	0.0948515	-0.0608911	0.24604	0.0691089	0.420396	0.320198	-0.241782	0.660297	-0.0815842	0.144158	0.115545	-0.168218	-0.0720792	0.039901	-0.225347	-0.53099	0.540594	-0.160099	0.0270297	0.401287	0.0330693	1.00703
0.439406	-1.09782	4.80366	-0.189802	-0.135446	0.272277	0.26604	0.194455	0.0394059	0.0529703	0.41703	0.580297	-0.247426	0.0214852	0.163168	-0.0432673	0.251287	-0.15495	0.439604	0.328812	-0.375743	0.671188	-0.0290099	0.121485	0.140891	-0.169109	-0.13802	-0.147624	-0.12198	-0.313168	0.384554	0.0261386	0.0985149	0.40901	-0.0888119	1.05871
0.420792	-0.782871	4.92149	-0.0654455	-0.140396	0.148812	0.0441584	0.166337	-0.0505941	-0.114158	0.324257	0.570099	-0.15703	0.0651485	0.494059	0.106832	0.283069	0.102871	0.296931	0.336832	-0.422178	0.743564	0.019604	0.0867327	-0.0140594	-0.136931	0.0354455	-0.0167327	-0.30703	-0.243465	0.298614	0.24396	0.328416	0.227327	-0.030297	0.891287
0.33099	-1.0901	4.88901	-0.212673	0.0736634	0.189307	-0.0570297	0.166931	0.318119	0.04	0.321782	0.612178	-0.12297	-0.0794059	0.654554	0.187327	0.318911	-0.0039604	0.442673	0.154851	-0.247426	0.726238	-0.180891	0.00069307	0.0140594	-0.105941	-0.00257426	0.0764356	-0.243069	-0.0906931	0.466931	0.21396	0.531188	0.265743	0.0885149	0.913564
0.413069	-0.966139	4.92554	-0.237129	-0.181584	0.166436	0.0716832	0.197624	0.418713	-0.0961386	0.21901	0.356139	-0.183267	-0.0930693	0.26604	-0.0149505	0.324554	0.0526733	0.426634	0.323861	-0.264158	0.708614	-0.161683	0.0981188	0.171584	-0.0421782	0.0221782	0.0786139	0.0109901	-0.118515	0.504653	0.242475	0.664752	0.304158	-0.0326733	0.757426
0.332673	-1.02337	4.87871	-0.172079	-0.0284158	0.204158	0.199208	0.00762376	0.199406	0.0586139	0.214059	0.517129	-0.0316832	0.0211881	0.237822	-0.0554455	0.41802	0.0865347	0.222673	0.334059	0.0591089	0.942475	-0.132277	0.0745545	0.168713	-0.0388119	0.0478218	-0.079505	-0.135545	-0.178218	0.233366	-0.0378218	0.675248	0.253762	-0.131485	0.722475
0.433762	-0.799703	4.84693	-0.198416	0.0245545	0.181584	0.258317	0.0373267	0.350693	-0.135743	0.0888119	0.513762	-0.12099	-0.180891	-0.182277	-0.0981188	0.394257	0.109109	0.20901	0.212079	-0.0563366	0.795743	0.139406	0.180693	0.169307	-0.0663366	0.232871	-0.0788119	-0.0711881	-0.240099	0.521683	0.0821782	0.596139	0.419604	0.19	0.616337
0.0029703	-0.976337	4.86921	-0.0443564	-0.0106931	0.126238	0.0383168	0.137327	0.200099	0.080495	0.424554	0.876337	0.0372277	0.0576238	-0.273267	-0.138911	0.148911	-0.0274257	0.134158	0.220693	-0.0723762	0.679406	0.099802	0.0559406	0.285545	-0.0335644	0.13703	0.0230693	-0.127822	-0.209802	0.533069	0.0821782	0.164158	0.514554	-0.00029703	0.490693
0.303465	-1.03208	4.83386	0.150297	-0.0453465	0.224059	0.197723	0.0364356	0.379109	0.0155446	0.272376	0.796139	-0.150297	0.0712871	-0.189604	-0.121584	0.273267	0.0686139	0.240297	0.258119	0.0724753	0.633366	0.0605941	0.161188	0.0358416	0.0395049	0.411386	-0.0454455	-0.00257426	-0.29703	0.764257	-0.355941	0.140891	0.272277	0.0866337	0.484455
0.346139	-0.908119	4.94703	-0.0653465	0.0366337	0.199604	0.283069	0.0080198	0.348416	0.0118812	0.168713	0.592178	-0.06	-0.0589109	-0.0866337	0.0585149	0.0845545	0.124554	0.16297	-0.0431683	-0.00148515	0.617327	-0.141782	0.0679208	0.126436	-0.11802	0.242673	0.0238614	0.059901	-0.195545	0.703861	-0.255644	-0.102376	0.373069	-0.0361386	0.350099
0.238515	-0.994752	5.23079	0.0365347	0.0604951	0.115149	0.122178	0.0661386	0.375347	0.0709901	0.133465	0.426733	-0.279703	-0.232574	0.0863366	-0.0819802	0.368614	0.241089	0.0575247	0.153564	0.0149505	0.443366	-0.126337	0.230693	0.00673267	0.0772277	0.335545	-0.165743	-0.0289109	-0.106733	0.569406	-0.101584	-0.408713	0.572079	-0.0970297	0.418911
0.183366	-0.960792	4.81059	-0.0279208	0.0540594	0.020099	0.0594059	-0.0856436	0.371881	-0.0608911	-0.00455446	0.710693	-0.339703	-0.187129	0.500594	0.00871287	0.533267	-0.0123762	0.0720792	0.0995049	-0.0284158	0.457327	0.0215842	0.235941	0.0670297	-0.0494059	0.387822	-0.0747525	0.0916832	-0.358911	0.643069	-0.0978218	0.06	0.393267	-0.22703	0.417426
0.237327	-0.954356	4.71347	-0.203267	0.0785148	0.303168	-0.161782	-0.0262376	0.336634	-0.152772	0.0577228	0.352475	-0.239109	-0.198911	0.325446	0.0591089	0.404752	0.144851	0.0550495	0.0388119	-0.099802	0.351287	0.290198	0.241782	0.16802	-0.0154455	0.439703	-0.00346535	0.00227723	-0.167426	0.497327	-0.245644	-0.020396	0.500396	-0.138515	0.0359406
0.252871	-1.04248	4.79574	-0.105545	-0.0816832	0.25	-0.223663	0.0925743	0.30198	-0.155545	0.020396	0.39396	-0.178515	-0.172574	0.467822	-0.14297	0.440396	0.112079	-0.0219802	0.0769307	0.167228	0.453663	0.177228	0.184554	0.0983168	-0.0989109	0.371287	0.0868317	0.0628713	-0.0380198	0.302475	-0.21495	0.486733	0.350396	-0.348218	0.346238
0.177723	-0.947228	4.72861	-0.0972277	0.0290099	0.287723	-0.103663	0.00346535	0.328515	-0.0970297	0.0154455	-0.0329703	-0.239109	-0.256832	0.204455	-0.122871	0.253564	0.13901	-0.136238	-0.00811881	0.0529703	0.438218	0.168317	0.335248	0.228317	0.0644554	0.420396	0.0893069	0.0931683	-0.348317	0.379802	-0.212871	0.80604	0.3	-0.419703	0.254653
0.190099	-0.841089	4.66059	0.0735644	0.121287	0.174554	-0.221782	0.131881	0.20703	-0.157327	0.0707921	-0.271188	-0.150396	-0.169901	0.089901	-0.0321782	0.41198	0.134653	-0.150495	-0.0919802	-0.050297	0.895248	-0.12198	0.399604	0.25802	-0.00158416	0.410792	0.0917822	0.164158	-0.168614	0.336832	-0.213762	0.724951	0.34297	-0.294951	0.197822
0.297129	-0.776139	4.53436	-0.0740594	-0.0186139	0.270693	-0.0977228	0.030396	0.29297	-0.0989109	0.00990099	-0.45495	-0.121089	-0.150099	-0.206733	-0.321782	0.442277	0.0715842	-0.0668317	-0.11703	-0.00415842	0.691287	0.117129	0.345149	0.227426	-0.0878218	0.403366	0.0358416	0.356337	-0.286436	0.323564	-0.282178	0.57396	0.667822	-0.108317	0.0090099
0.473267	-0.64	4.33663	-0.0895049	-0.120594	0.525049	-0.345842	0.0310891	0.19802	-0.00168317	0.00712871	-0.423069	-0.281782	-0.0387129	-0.254059	-0.0516832	0.50505	-0.0330693	-0.362871	-0.020198	-0.0491089	0.576832	0.327228	0.288218	0.19802	0.0731683	0.643762	0.00950495	0.225446	-0.28703	0.550495	-0.281485	0.523861	0.371782	-0.0514852	-0.18
0.461188	-0.724455	4.1098	-0.108713	-0.0723762	0.189109	-0.346535	-0.0576238	0.382772	-0.00168317	-0.0366337	-0.42396	-0.242079	-0.0507921	-0.181683	-0.192574	0.35	0.181683	-0.34802	-0.235248	-0.156139	0.471386	0.15703	0.383762	0.289208	0.00782178	0.414752	-0.175842	0.194257	-0.535545	0.569604	-0.151188	0.383465	0.193465	-0.114554	0.14396
0.508416	-0.688911	4.04366	-0.0975247	-0.115049	0.191287	-0.217525	-0.0264356	0.340297	-0.0438614	-0.0706931	-0.427327	-0.434554	-0.150693	-0.106931	-0.486238	0.475248	0.0895049	-0.303762	-0.170297	-0.111584	0.517228	0.146436	0.32901	0.200693	-0.0234653	0.447327	-0.173366	0.160891	-0.184257	0.620297	-0.020297	0.0467327	0.234951	-0.0864356	-0.0731683
0.438812	-0.594951	3.92059	-0.0236634	-0.225545	0.287426	-0.188515	-0.0864356	0.118416	-0.00356436	0.0884158	-0.471386	-0.436139	0.149703	0.0338614	-0.224158	0.448317	0.177921	-0.290792	-0.126535	0.0648515	0.652673	0.267129	0.244554	0.205347	-0.020396	0.338614	-0.170891	-0.0315842	-0.150297	0.358614	0.101881	-0.164059	0.312079	0.00079208	0.0511881
0.367624	-0.552475	3.73089	0.271188	-0.20703	0.232673	-0.438812	-0.0870297	0.249109	-0.16297	-0.0724753	-0.653564	-0.318911	-0.13802	0.296832	-0.0811881	0.173267	0.234851	-0.368713	-0.0333663	0.0511881	0.669109	0.227525	0.0895049	0.207129	-0.0776238	0.360594	-0.107525	0.0247525	-0.265941	0.320297	0.132574	-0.212871	0.247624	0.0574257	0.0255445
0.416733	-0.460594	3.86366	0.0953465	-0.0891089	0.20703	-0.41	-0.0273267	0.249703	-0.189307	0.0268317	-0.568218	-0.441386	-0.306436	0.528317	-0.222277	0.17604	0.112673	-0.47604	-0.0933663	-0.0948515	0.687327	0.367624	0.314158	0.079604	0.0851485	0.382574	-0.0134653	0.0831683	-0.142574	0.249208	0.477525	-0.170198	-0.0533663	0.0546535	-0.060099
0.467129	-0.358713	3.70673	-0.0104951	-0.0423762	0.242673	-0.409406	0.00207921	0.06	-0.287822	0.114653	-0.673465	-0.382673	0.0713861	0.690693	-0.0471287	0.329406	0.171782	-0.34495	-0.0311881	0.170297	0.554059	0.239604	0.257327	-0.00792079	0.150099	0.473267	0.0893069	0.211287	-0.259505	0.137426	0.356535	0.311584	0.293465	0.0218812	-0.182673
0.455743	-0.355644	3.75297	0.251584	-0.0541584	0.187624	-0.158416	-0.116931	0.089703	-0.126832	0.0549505	-0.76901	-0.325149	-0.153564	0.422772	-0.0623762	0.182178	0.110594	-0.582277	-0.311782	0.0920792	0.472574	0.099703	0.133168	0.144851	0.272574	0.36396	0.0617822	0.179109	-0.136733	0.124752	0.327525	0.704951	0.430198	-0.099604	0.0147525
0.135248	-0.382277	3.62891	0.235149	-0.0956436	0.222574	0.0318812	-0.0862376	-0.0312871	-0.124752	0.0230693	-0.594257	-0.136733	0.251485	0.346436	-0.0757426	0.274257	0.0775248	-0.49901	-0.00019802	-0.0152475	0.708317	0.0283168	0.296238	0.0857426	0.18198	0.354653	0.12396	0.265644	-0.25396	0.334851	0.447525	0.749208	0.558614	-0.099901	-0.0359406
0.566337	-0.16099	3.54723	0.309307	-0.0758416	0.127921	0.0318812	0.00405941	-0.0318812	-0.212673	0.143663	-0.691386	-0.11198	-0.104455	0.112178	0.188218	0.36396	0.103465	-0.646634	-0.0917822	0.0568317	0.575248	0.0450495	0.171188	0.279703	-0.00643564	0.251584	0.12703	0.332178	-0.311485	0.323762	0.196337	0.787921	0.47505	-0.0417822	0.226139
0.36703	-0.349505	3.27495	0.384158	0.10396	0.165049	-0.18901	-0.15901	-0.161287	-0.0893069	-0.137822	-0.950099	-0.114455	0.170693	-0.0623762	-0.0759406	0.176733	0.0415842	-0.442079	-0.28396	0.200396	0.588317	0.225842	0.172673	0.253465	-0.0049505	0.270792	0.0995049	0.537228	-0.118713	0.154158	0.0181188	0.576238	0.172871	0.0479208	-0.0551485
0.451782	-0.247327	3.37307	0.367525	-0.0681188	0.109604	0.089703	-0.0881188	-0.19099	-0.0277228	-0.0784158	-0.707525	0.1	-0.0849505	-0.0484158	-0.14802	0.237426	0.191584	-0.547525	-0.166436	0.123069	0.408515	0.0256436	-0.0339604	0.0990099	-0.00158416	0.202079	0.00227723	0.379406	-0.365347	0.424257	-0.05	0.116436	0.430297	0.239208	-0.0755446
0.290594	-0.217921	3.1399	0.291386	-0.107723	0.244257	-0.100297	-0.0881188	-0.280396	-0.0855445	0.019703	-0.936832	-0.0661386	-0.019604	0.126832	0.089901	0.174059	0.259109	-0.562376	-0.257723	0.105149	0.356337	0.710396	0.0605941	0.0436634	0.247822	0.130693	0.00534653	0.24198	-0.390099	0.196238	-0.108416	-0.21396	0.408614	0.0192079	-0.0653465
0.624752	-0.157624	3.07911	0.364653	-0.0873267	0.151089	-0.0688119	-0.117822	-0.118911	-0.0549505	-0.0090099	-0.606733	-0.0310891	0.0670297	0.480693	-0.0109901	0.0137624	0.185446	-0.706535	-0.0708911	-0.0130693	0.332277	0.235149	0.0361386	0.208317	0.0593069	0.119208	-0.232475	0.516139	-0.444851	0.275347	0.020297	-0.555545	0.227624	-0.0432673	-0.0222772
0.118812	-0.188218	3.12802	0.377723	-0.0263366	0.127921	-0.0979208	-0.0294059	-0.0283168	-0.234951	-0.0462376	-0.618416	-0.105743	-0.0254455	0.494554	0.0354455	-0.0455446	0.154257	-0.660792	-0.133366	0.0677228	0.268515	0.0383168	-0.149208	0.0854455	-0.0606931	0.107822	-0.199703	0.479307	-0.377129	0.206931	-0.111485	-0.0728713	0.428416	-0.0151485	-0.130792
0.395644	-0.247624	2.88574	0.300693	-0.135941	0.0734653	-0.0663366	-0.0905941	-0.189505	-0.233069	-0.0453465	-0.75802	-0.140297	-0.163168	0.598218	-0.23	0.175743	0.0311881	-0.542277	-0.174653	-0.0493069	0.402574	0.100891	-0.115842	0.0312871	-0.0009901	0.247921	-0.166634	0.441188	-0.336337	0.197624	0.140099	9.901e-05	0.437624	-0.207327	-0.0887129
0.449505	-0.0573267	2.92317	0.283366	-0.206436	0.020297	-0.214455	-0.0590099	0.00049505	-0.172772	-0.162178	-0.832277	-0.207426	0.0515842	0.681485	-0.334554	-0.0129703	0.0261386	-0.612475	-0.387129	0.0939604	0.494455	0.12099	-0.0105941	0.099604	0.0320792	0.0571287	-0.191386	0.686535	-0.318614	0.187723	0.141584	0.333663	-0.0214852	0.0113861	-0.261089
0.387921	-0.0533663	2.61842	0.353267	-0.0563366	0.0558416	-0.212871	-0.120297	0.122079	-0.142475	0.122079	-0.820198	-0.122673	-0.0471287	0.626634	-0.387921	0.45297	0.304951	-0.502376	-0.268317	0.106634	0.0638614	-0.0777228	-0.00594059	-0.142277	0.192376	0.10901	-0.219505	0.557822	-0.410297	-0.0428713	-0.00930693	0.406931	0.207822	0.142376	-0.112475
0.165446	-0.0515842	2.46614	0.363465	-0.195941	-0.0392079	-0.211287	-0.120594	-0.0248515	-0.171188	0.253861	-0.685941	-0.0576238	0.0379208	0.360891	-0.462772	-0.0417822	-0.01	-0.629802	-0.270198	0.0617822	-0.0435644	0.135149	-0.0994059	-0.264257	0.0627723	0.0721782	-0.287624	0.480693	-0.430693	-0.123069	0.30198	0.639307	0.245842	0.20297	0.0257426
0.0442574	-0.139406	2.10109	0.433069	-0.0783168	0.0350495	-0.060099	-0.193366	-0.0217822	-0.140297	0.189406	-0.762277	0.119307	0.154158	0.123564	-0.72703	0.27505	0.0747525	-0.547228	-0.182673	0.194455	0.0758416	-0.0322772	-0.214158	-0.0662376	0.102178	0.283762	-0.155149	0.411683	-0.319505	0.248317	0.0225743	0.273168	-0.18703	0.26297	-0.0760396
0.0717822	0.0258416	1.73515	0.283366	0.0338614	0.0111881	-0.090099	-0.164851	-0.108713	-0.079604	0.134951	-0.555941	0.0227723	0.312277	-0.115545	-0.461287	0.249109	0.188614	-0.437426	-0.306337	-0.161386	-0.12505	0.0914852	-0.119208	0.133069	0.100891	0.177327	-0.212079	0.495545	-0.178416	0.0784158	-0.0758416	0.28802	-0.0493069	0.203267	-0.0546535
0.260198	-0.0264356	1.77228	0.395149	0.0257426	0.10703	0.0108911	-0.0948515	-0.145941	-0.0181188	0.171089	-0.73198	-0.0433663	0.147624	-0.223465	-0.598911	0.0665347	0.222178	-0.403663	-0.339208	0.0434653	-0.0474257	0.118713	-0.204554	0.111188	0.100297	0.0783168	-0.337723	0.367822	-0.196931	0.188218	-0.386436	-0.00960396	-0.0105941	0.0726733	0.116436
-0.0885149	-0.049604	1.40911	0.306337	-0.133267	0.0534654	-0.146931	-0.0942574	-0.010396	-0.109703	0.243861	-0.807723	0.0395049	0.0254455	-0.0895049	-0.526832	0.130891	0.275941	-0.479604	-0.222079	-0.13198	0.00643564	0.0834653	-0.271089	0.281089	0.060297	0.191485	-0.203465	0.272178	-0.53703	0.0167327	-0.326139	-0.468812	-0.224752	0.172673	0.0190099
-0.0885149	-0.0709901	1.22287	0.503762	0.0690099	0.09	-0.0537624	-0.0649505	-0.134158	-0.170396	-0.040495	-0.704356	0.0642574	-0.0345545	0.172871	-0.383564	-0.0834653	0.389802	-0.134653	-0.507624	-0.118416	-0.170297	0.137327	-0.267129	0.130693	0.100297	0.156238	-0.329406	0.192277	-0.33901	0.0371287	-0.545842	-0.647327	-0.0989109	0.101683	0.2
-0.118812	-0.0629703	1.00752	0.482673	-0.218119	0.0356436	0.0175247	-0.0971287	-0.218218	-0.141089	0.124851	-0.599802	-0.224158	-0.136337	0.344257	-0.31	0.0523762	0.203267	-0.357426	-0.450099	-0.134554	-0.220693	0.0723762	-0.222178	0.332376	0.188812	0.123762	-0.0450495	0.153861	-0.524356	0.0569307	-0.35396	-0.635842	-0.15396	0.0732673	-0.0313861
-0.115941	0.104455	0.92099	0.329802	-0.15802	0.00346535	-0.0790099	-0.165545	-0.181089	-0.140396	0.128614	-0.461188	-0.141188	-0.137228	0.662871	-0.386733	0.0876238	0.156436	-0.32802	-0.202574	-0.179703	-0.401683	0.12802	-0.15901	0.243168	0.127327	0.148515	-0.263861	0.277426	-0.576337	0.0160396	-0.223366	-0.624653	-0.0871287	0.14297	0.02
-0.233069	0.0452475	0.894356	0.378119	-0.137327	0.259703	0.0837624	-0.0348515	-0.145446	0.0211881	0.262079	-0.581584	-0.106733	-0.00782178	0.835248	-0.430891	0.123168	0.190297	-0.240495	-0.206238	-0.254851	-0.333663	-0.0360396	-0.214158	0.412475	0.0561386	0.0244555	-0.258911	0.138119	-0.375743	-0.0522772	-0.100891	-0.172574	-0.0824752	0.14396	0.187921
-0.140891	0.273663	0.484356	0.34495	-0.363168	0.146238	-0.108119	0.0561386	-0.165545	-0.197822	0.00455446	-0.222277	-0.0219802	-0.07	0.37703	-0.414158	0.158713	0.112871	-0.0207921	-0.23901	-0.27	-0.41901	-0.070396	-0.178614	0.36396	0.0570297	0.0212871	-0.224257	0.199406	-0.112475	-0.0575247	-0.18802	0.119505	-0.0759406	0.0157426	0.116436
-0.166832	0.224455	0.494653	0.229901	-0.501188	0.242079	-0.10901	-0.0632673	-0.154653	-0.0178218	0.227624	-0.34802	0.06	0.0468317	0.224851	-0.369307	0.164356	0.176634	-0.172673	-0.242673	-0.00168317	-0.694951	0.206436	-0.173762	0.495743	0.127624	-0.0124753	-0.059604	0.0631683	-0.309802	0.0875247	-0.433366	0.378515	0.029604	0.0482178	0.354752
-0.0730693	0.144951	0.241485	0.236733	-0.188911	0.0992079	0.0541584	0.0258416	0.0452475	0.0534654	0.0106931	-0.153366	-0.00524752	-0.0465346	0.0881188	-0.255446	0.260198	0.0992079	-0.0273267	-0.465743	-0.159406	-0.75	0.172475	-0.198218	0.567525	0.187921	-0.0540594	-0.0275248	0.146139	-0.150495	0.138911	0.0395049	0.196832	-0.284851	-0.0417822	0.270198
-0.289703	0.0694059	-0.0734653	0.401683	-0.265743	-0.0536634	0.115446	-0.0954455	-0.105545	0.201881	0.514455	-0.240594	-0.0110891	0.0694059	-0.180099	-0.243069	0.326139	-0.0850495	-0.0592079	-0.339802	-0.0187129	-0.896931	0.141881	-0.102673	0.769901	-0.0908911	-0.0843564	-0.0541584	-0.142178	-0.322178	0.00960396	-0.207723	-0.0763366	-0.237723	0.112574	0.384653
-0.0706931	0.141485	-0.181782	0.469703	-0.0825743	-0.108416	-0.0748515	-0.0647525	0.254356	-0.0181188	0.148119	-0.0875247	-0.0166337	0.0369307	-0.10901	-0.449109	0.269901	-0.0927723	0.126436	-0.283861	-0.059901	-0.80604	0.201881	-0.128713	0.724752	0.100891	0.0750495	-0.109505	-0.331782	-0.25198	0.00277228	-0.0514852	-0.158911	-0.27	0.0519802	0.518614
-0.0663366	0.184554	-0.340396	0.377426	-0.401782	-0.102574	-0.103267	-0.00534653	0.0160396	0.0812871	0.152772	-0.147525	-0.303465	0.0628713	-0.0388119	-0.43396	0.427624	-0.101386	0.0357426	-0.347624	-0.00732673	-0.776634	-0.453366	-0.153762	0.606535	0.104653	-0.113069	-0.0136634	-0.0589109	-0.271782	0.336634	-0.0530693	-0.429604	-0.195347	-0.0658416	0.501287
-0.120495	0.300297	-0.568812	0.45604	-0.379505	-0.0660396	-0.129505	-0.0353465	0.146238	0.197921	0.124653	-0.211881	-0.029703	-0.089604	-0.00019802	-0.448218	0.49198	-0.0772277	0.0632673	-0.324752	0.0168317	-0.927525	0.10297	-0.029802	0.529505	-0.0834653	-0.0827723	-0.258713	-0.256733	-0.289703	0.17099	0.268515	-0.668416	-0.218614	0.30604	0.543663
-0.175842	0.194554	-0.667723	0.393465	-0.548812	0.0293069	0.0910891	-0.0672277	0.217624	0.0154455	0.187723	-0.219901	-0.198416	-0.0926733	0.230396	-0.331881	0.350297	-0.0224752	0.0623762	-0.450297	0.010297	-1.15218	0.0707921	0.00673267	0.630693	-0.0491089	-0.233069	-0.12505	-0.174752	-0.30703	-0.0264356	0.0494059	-0.691584	-0.181188	-0.0039604	0.468911
-0.139406	0.461287	-0.771089	0.249901	-0.176535	-0.0260396	-0.0389109	0.0215842	0.329307	-0.0277228	-0.0295049	-0.19703	0.0147525	-0.0364356	0.241782	-0.348614	0.511782	-0.120594	0.209901	-0.306139	0.0728713	-1.15713	-0.0309901	-0.0764356	0.520594	-0.0760396	-0.271485	-0.0286139	-0.151287	-0.166832	-0.0338614	0.0815842	-0.53297	-0.425644	-0.00554455	0.61198
-0.132574	0.287921	-0.790297	0.256436	-0.183663	-0.0483168	0.120792	-0.0993069	0.459802	0.158218	0.00356436	-0.207228	0.199901	-0.00831683	0.28099	-0.553168	0.459802	-0.225842	0.117426	-0.153564	-0.0345545	-1.12366	0.0105941	-0.160594	0.564257	-0.133267	-0.170297	0.00821782	-0.249703	-0.183564	0.0883168	0.364059	-0.304653	-0.358515	-0.0355446	0.430297
-0.0951485	0.213663	-0.939505	0.413564	-0.322574	-0.101485	-0.0716832	-0.129307	0.249109	0.0635644	-0.0839604	-0.219604	-0.0550495	-0.171386	0.391188	-0.259604	0.248218	-0.29297	0.175644	-0.318614	-0.159505	-1.28931	-0.238218	-0.0956436	0.455644	-0.0719802	-0.270297	-0.0440594	-0.197129	0.0509901	-0.0805941	0.233762	0.0249505	-0.41297	-0.168911	0.50297
-0.179802	0.359109	-0.800297	0.300693	-0.198515	0.0856436	-0.0707921	0.020099	0.200198	0.059802	-0.269901	-0.429703	0.099703	0.0473267	0.29802	-0.276634	0.466238	-0.0815842	0.582871	-0.227624	-0.134455	-1.01485	-0.0270297	-0.0292079	0.749901	-0.0388119	-0.228515	0.0242574	-0.352772	-0.0972277	-0.0283168	0.364455	-0.00485149	-0.730792	-0.13297	0.646634
-0.145743	0.657327	-0.692574	0.469109	-0.205842	0.0315842	0.0577228	-0.0395049	0.148911	0.334257	-0.16495	-0.292277	0.0544555	0.206436	-0.132475	-0.413663	0.725545	-0.248416	0.270693	-0.305049	-0.230297	-1.16881	-0.117327	-0.0514852	0.634455	-0.0363366	-0.195149	0.00168317	-0.329901	0.0475247	0.0524753	0.334752	0.384158	-0.253069	0.0433663	0.718119
-0.0204951	0.485248	-0.626733	0.627129	-0.27703	-0.0815842	0.11802	0.0786139	0.158515	0.269901	-0.291188	-0.230396	0.0192079	0.172772	-0.21505	-0.433168	0.333366	-0.228614	0.299505	-0.213366	0.0156436	-1.42376	-0.265842	-0.105347	0.368416	-0.0938614	-0.41396	0.169109	-0.462673	-0.069802	0.233267	0.27505	0.0808911	-0.305049	0.102178	0.627129
-0.162178	0.603762	-0.584257	0.26396	-0.257822	0.0164356	0.0558416	-0.10198	0.106238	0.417426	-0.320198	-0.659505	0.0817822	0.26	-0.396337	-0.300495	0.584257	-0.167921	0.385545	-0.290792	-0.17901	-1.4	0.0763366	-0.0660396	0.511485	-9.901e-05	-0.346238	-0.0137624	-0.465743	-0.0480198	0.125842	-0.040099	-0.040198	-0.392871	0.204059	0.484851
-0.223465	0.432376	-0.465248	0.491386	-0.367723	-0.167921	0.0836634	0.0161386	0.118317	0.634059	-0.257426	-0.453564	0.0744555	0.0975247	-0.196139	-0.351287	0.561089	-0.216931	0.222178	-0.300693	0.00485149	-1.52802	-0.201881	0.0319802	0.58505	-0.0864356	-0.493168	-0.00910891	-0.471584	0.0533663	0.368416	-0.0039604	-0.341188	-0.211683	0.174455	0.425446
-0.243861	0.481188	-0.238416	0.367624	-0.278515	-0.413861	-0.0491089	-0.0760396	0.248515	0.51	-0.0653465	-0.519406	0.0258416	0.0966337	-0.24505	-0.243861	0.630693	-0.406535	0.259703	-0.21	-0.099802	-1.53485	-0.419406	-0.0208911	0.467723	0.00633663	-0.336931	0.147129	-0.535248	0.00792079	0.389406	0.103465	-0.831881	-0.332376	0.0769307	0.472871
-0.0458416	0.694059	-0.152772	0.284752	-0.360594	-0.127327	-0.139703	-0.136931	0.34901	0.376634	-0.40099	-0.458713	-0.352475	-0.0524753	0.234851	-0.0142574	0.488416	-0.386139	0.0931683	-0.277426	-0.193762	-1.70109	-0.387228	-0.104951	0.388911	0.289703	-0.423267	0.00366337	-0.411782	0.0239604	0.259505	0.3	-0.675446	-0.240495	0.18099	0.664356
-0.0971287	0.624455	-0.132079	0.474653	-0.332079	0.00821782	-0.112178	-0.049703	0.399505	0.221089	-0.309505	-0.752277	0.00950495	0.0372277	0.171683	-0.313465	0.773663	-0.335446	0.178515	-0.284257	0.113762	-1.63733	-0.0428713	0.0190099	0.431287	0.0134653	-0.479307	0.069802	-0.547327	-0.020198	0.23901	0.205842	-0.318317	-0.386832	0.114059	0.524554
0.0308911	0.706733	-0.0113861	0.453267	-0.313861	-0.206139	-0.144653	-0.0524753	0.438119	0.173663	-0.214554	-1.07931	-0.338812	-0.11495	0.311287	-0.374851	0.619307	-0.125347	0.302673	-0.290396	0.0215842	-1.80386	-0.00732673	0.15802	0.223069	0.108812	-0.134356	0.166832	-0.39297	-0.00475248	0.0485148	-0.00712871	-0.195545	-0.207426	0.0880198	0.433564
0.0104951	0.519604	0.0777228	0.341287	-0.395049	-0.039901	0.0128713	-0.186535	0.416139	0.327723	-0.049604	-0.908812	-0.00811881	-0.0536634	0.354257	-0.113069	0.525149	-0.353366	0.417129	-0.589703	0.111584	-1.6504	-0.00237624	0.0360396	0.265149	-0.22495	-0.378416	0.144554	-0.465743	0.138515	0.218911	0.25	-0.0608911	-0.263762	0.060198	0.41099
-0.0090099	0.633762	0.0641584	0.500297	-0.214356	-0.0370297	-0.0562376	0.129505	0.355743	0.16396	0.113762	-1.06267	-0.105545	0.226337	0.175347	-0.160099	0.777426	-0.362673	0.292178	-0.309604	0.109406	-1.74941	0.0694059	-0.05	0.347822	0.0308911	-0.313465	0.281683	-0.469109	0.313267	0.206832	0.256535	0.135644	-0.417525	-0.0588119	0.269703
0	0.597228	0.237426	0.38901	-0.164851	-0.0632673	-0.0843564	-0.0332673	0.334158	0.0987129	0.23901	-1.23653	-0.0532673	-0.050198	-0.124455	-0.109307	0.503069	-0.31198	0.288812	-0.314257	-0.111782	-1.78564	-0.0881188	0.0477228	0.039901	-0.0241584	-0.36703	0.408812	-0.502178	0.328416	0.357624	0.293663	0.291287	-0.0610891	-0.0578218	0.368416
0.14396	0.593168	0.0991089	0.428911	-0.234455	0.0306931	-0.111881	-0.125743	0.402871	0.191881	0.0820792	-1.07317	-0.0609901	-0.0232673	-0.141782	-0.224158	0.509604	-0.252772	0.34198	-0.290693	-0.0823762	-1.92366	0.194653	0.0835644	0.37198	0.070198	-0.241782	0.295644	-0.563366	0.281386	0.128119	0.090396	0.236931	-0.186139	0.123762	0.289604
0.114455	0.497525	-0.0734653	0.44099	-0.394059	-0.126238	-0.112475	-0.0419802	0.48	0.246238	0.215743	-1.20475	-0.158416	0.257921	-0.599406	-0.141485	0.474257	-0.332376	0.397921	-0.208713	-0.140198	-1.99168	-0.0206931	-0.00148515	0.0953465	-0.0464356	-0.166832	0.302475	-0.623069	0.269901	0.324851	-0.163663	0.122871	-0.146139	0.315545	0.358515
0.125248	0.520396	-0.00554455	0.390891	-0.0933663	0.0668317	0.0805941	-0.0469307	0.486832	0.141584	0.218812	-1.13287	-0.283366	0.0669307	-0.339208	-0.35	0.612277	-0.271386	0.423366	-0.376832	-0.198911	-2.06188	0.45604	-0.0286139	0.0474257	-0.0436634	0.0587129	0.527723	-0.374851	0.34505	0.47495	0.0327723	-0.124653	-0.303663	0.230495	0.146535
0.233663	0.545446	0.0369307	0.650792	-0.264554	-0.0175247	-0.136337	0.11	0.584851	-0.114059	0.313762	-1.19406	-0.080198	0.13604	-0.389604	-0.365149	0.456634	-0.44	0.357525	-0.344851	-0.358515	-2.19208	0.0675247	0.254158	-0.0313861	-0.0675247	-0.0363366	0.46297	-0.318317	0.449307	0.14198	-0.181089	-0.342475	-0.209604	0.101089	-0.0657426
0.0860396	0.509208	0.0990099	0.442871	-0.183861	-0.0444555	0.0273267	0.0357426	0.696931	0.0715842	0.567525	-1.16376	-0.17604	0.318515	-0.126931	-0.443366	0.403465	-0.448119	0.379109	-0.200099	-0.167921	-2.17287	0.163069	0.00633663	0.231683	0.0561386	-0.0316832	0.404851	-0.256535	0.31297	0.410792	-0.0142574	-0.41099	-0.266535	0.040495	-0.0290099
0.154059	0.471782	0.13901	0.29396	-0.194356	0.109505	-0.040495	0.0335644	0.638119	-0.0551485	0.510594	-1.25653	-0.183465	0.0409901	0.192673	-0.430693	0.659406	-0.456832	0.341287	-0.396238	-0.324752	-2.15376	0.0383168	-0.0239604	0.173168	0.0274257	0.0742574	0.40802	-0.314356	0.267525	0.118713	0.150099	-0.24604	-0.0443564	0.0407921	-0.0534654
0.165545	0.613762	0.105545	0.0532673	0.113564	-0.228317	0.0919802	0.0283168	0.64802	-0.030099	0.604851	-1.38218	-0.127822	0.233168	0.422178	-0.200792	0.317822	-0.567921	0.335446	-0.402772	-0.104158	-2.16455	0.142673	0.0960396	0.122475	-0.160099	0.14198	0.412376	-0.374059	0.28297	0.0470297	0.33505	0.0382178	-0.394059	0.040099	-0.0766337
0.117228	0.545347	0.0980198	-0.119901	0.101782	-0.316139	0.152574	-0.156634	0.539109	-0.194059	0.579208	-1.60772	-0.134257	0.265347	0.0927723	-0.413069	0.666535	-0.478713	0.209901	-0.224158	0.0286139	-2.23515	0.0492079	0.129505	0.13396	0.0932673	0.178515	0.414851	-0.279406	0.269703	-0.00465347	0.130594	0.355347	-0.267129	0.103168	0.0586139
0.408713	0.447228	0.188416	-0.271188	-0.159604	-0.164257	0.0635644	0.0881188	0.201782	-0.138713	0.525347	-1.39327	-0.0413861	0.176931	-0.0580198	-0.469703	0.616733	-0.394851	0.206832	-0.382871	-0.127624	-2.59366	0.0929703	0.0704951	0.0835644	0.0388119	0.156535	0.385842	-0.49901	0.224851	0.0808911	0.253762	0.459703	-0.355842	0.177525	-0.254851
0.168911	0.497921	0.214059	-0.391584	0.0174257	-0.192178	-0.155842	0.010396	0.373564	-0.0720792	0.342772	-1.4304	-0.0484158	0.211881	-0.207822	-0.214455	0.621089	-0.462574	0.413168	-0.109703	-0.0351485	-2.39099	0.128515	-0.019802	0.0608911	0.104951	0.102475	0.356733	-0.468416	0.27	0.126931	0.259406	0.553762	-0.57802	0.240297	-0.145941
0.17703	0.457723	0.254851	-0.563861	0.215743	-0.130297	0.127822	-0.0273267	0.354356	0.0738614	0.290198	-1.36782	-0.0527723	0.0877228	-0.258317	-0.37297	0.600396	-0.310891	0.379109	-0.306238	0.00881188	-2.5998	0.102871	0.129307	0.0710891	0.137822	0.260594	0.298317	-0.306535	0.314554	0.0846535	0.0765346	0.274059	-0.434257	0.184257	-0.240693
0.283861	0.538416	0.140693	-0.244653	0.366139	-0.0987129	0.261188	-0.0944554	0.394653	-0.019604	0.235743	-1.09366	-0.0993069	0.473861	-0.59	-0.297723	0.635941	-0.448713	0.22505	-0.28396	0.0709901	-2.70842	0.0681188	-0.152277	0.113168	0.0818812	0.117723	0.13901	-0.464158	0.183168	0.102574	-0.0388119	0.244653	-0.368812	0.21802	-0.35604
0.263465	0.558218	0.0259406	-0.426634	0.385644	0.00376238	0.23396	-0.159406	0.214554	-0.0524753	0.272871	-1.22327	0.0548515	0.258713	-0.392277	-0.069703	0.392772	-0.455743	0.340099	-0.452871	-0.0249505	-2.66822	0.114653	-0.0219802	0.0343564	0.245941	0.184257	0.357723	-0.304158	0.0417822	0.11802	-0.00752475	-0.255049	-0.309109	0.0583168	-0.197426
0.138119	0.517129	-0.125941	-0.567426	0.213366	-0.0246535	0.23396	-0.0752475	0.225347	0.0334653	0.0591089	-1.32287	-0.0706931	0.262376	-0.0442574	0.0258416	0.489901	-0.583762	0.524752	-0.239406	-0.0818812	-2.61644	0.019604	0.0373267	-0.0835644	-0.0009901	0.191386	0.359307	-0.336238	0.125941	0.28099	-0.0635644	-0.315347	-0.0930693	0.151782	-0.34
0.273069	0.534752	-0.121881	-0.558515	-0.00594059	-0.123069	0.328218	0.171089	0.0127723	-0.0890099	0.0637624	-1.64158	-0.0462376	0.236139	0.0531683	-0.0261386	0.394257	-0.498713	0.495049	-0.188713	-0.169109	-2.60782	0.125842	0.0948515	0.0885149	0.0318812	0.257822	0.295941	-0.217228	-0.0780198	0.0451485	0.0857426	-0.605644	-0.158713	0.0932673	-0.431881
0.309208	0.551782	-0.222772	-0.579208	0.231683	-0.060198	0.360693	-0.0828713	0.146832	-0.281485	-0.080396	-1.71	-0.0236634	0.211683	0.121188	-0.266535	0.499208	-0.53396	0.433168	0.0953465	-0.0176238	-2.7795	0.030495	0.0620792	-0.0878218	0.0371287	0.234653	0.137129	-0.339406	0.0655445	0.120297	-0.0345545	-0.286337	-0.202772	0.12505	-0.396238
0.284752	0.571287	-0.294257	-0.573069	0.147822	-0.0893069	0.143762	-0.059703	0.0926733	-0.0914852	0.0748515	-1.65683	-0.0610891	-0.16495	0.200792	-0.0975247	0.406634	-0.671089	0.489109	-0.0705941	0.0842574	-2.65277	-0.0242574	0.150198	-0.135446	0.0117822	0.212673	0.326436	-0.308812	0.138515	0.266634	0.410099	-0.0109901	-0.0768317	0.0669307	-0.321287
0.250693	0.379208	-0.339802	-0.507129	0.266139	-0.0837624	0.148119	-0.0333663	0.158812	-0.220792	-0.139802	-1.72436	0.0821782	0.0618812	0.302277	-0.0188119	0.602871	-0.67604	0.549703	0.145644	0.205149	-2.79634	0.171584	0.0871287	-0.0639604	0.136733	0.158614	0.295446	-0.251881	0.126436	0.191782	0.344158	0.109901	-0.166832	0.0688119	-0.312673
0.386238	0.429604	-0.230297	-0.561584	0.0325743	-0.00851485	0.18	-0.0371287	0.132475	-0.372277	-0.0352475	-1.81931	-0.0136634	0.0362376	0.0608911	-0.260495	0.611584	-0.523465	0.430891	-0.0184158	0.366733	-2.5696	0.297426	0.0540594	0.108119	0.0806931	0.224851	0.384158	-0.153069	-0.0144554	-0.069604	0.376634	0.300495	0.0112871	0.039703	-0.40495
0.261782	0.510891	-0.522871	-0.556634	0.107129	-0.0435644	0.280594	-0.101782	0.197426	-0.372277	-0.159703	-1.78614	0.101089	0.202673	-0.241683	-0.191287	0.889406	-0.498713	0.461881	0.0763366	0.461089	-2.52564	0.494158	-0.0387129	-0.100495	0.145347	0.422277	0.324158	-0.155842	0.100693	0.0974257	0.314851	0.550495	-0.140495	0.0718812	-0.486634
0.366733	0.380396	-0.390693	-0.59297	0.0651485	-0.130099	0.373366	0.0835644	0.115842	-0.280693	0.125842	-1.82139	0.00366337	0.16703	-0.452673	-0.123168	0.588416	-0.535545	0.493366	0.187624	0.345149	-2.15198	0.31099	0.18099	0.0605941	0.059703	0.328713	0.224158	-0.156832	0.238614	0.0853465	0.198911	0.427327	-0.216139	0.0427723	-0.38802
0.340099	0.550198	-0.393168	-0.617723	0.241485	0.0029703	0.34703	-0.171386	0.271089	-0.408218	-0.115545	-1.8297	0.155941	0.214158	-0.445545	-0.323861	0.659208	-0.633564	0.393366	0.212376	0.57198	-2.20921	0.416535	0.0788119	-0.0161386	0.121881	0.184851	0.102574	0.0588119	0.104752	0.132673	-0.019802	0.0129703	-0.181386	-0.115149	-0.408119
0.625644	0.540297	-0.418515	-0.480891	0.0106931	0.0335644	0.216733	-0.176634	0.219802	-0.249208	0.108812	-1.67653	0.079703	0.0588119	-0.597525	-0.259901	0.858812	-0.492178	0.467129	0.117723	0.667525	-1.73495	-0.0785148	0.17604	0.114059	0.125644	0.372574	0.262574	-0.0473267	0.00237624	0.208218	0.0460396	-0.299802	-0.0670297	0.135446	-0.42604
0.25396	0.44099	-0.385941	-0.537525	-0.0328713	-0.0351485	0.257624	-0.149406	0.167228	-0.219208	-0.136535	-1.90396	-0.019901	0.184653	-0.210099	-0.344059	0.902772	-0.249604	0.37	0.303069	0.673663	-1.5701	0.322178	0.0410891	0.0329703	0.069703	0.318119	0.292871	-0.241881	0.0508911	0.326535	0.240693	-0.37099	-0.100396	0.202673	-0.32396
0.330198	0.43297	-0.329307	-0.572871	-0.0449505	-0.0335644	0.0988119	-0.0237624	0.234653	-0.217426	-0.381584	-1.75267	0.00386139	0.0405941	0.0457426	-0.249109	0.785446	-0.538218	0.443168	0.227822	0.712871	-1.59703	0.328416	0.0983168	-0.0787129	0.262178	0.415545	0.0712871	0.0437624	0.0379208	0.0935644	0.367822	-0.773168	-0.415941	0.0460396	-0.369802
0.365149	0.423762	-0.214851	-0.467327	-0.0583168	-0.090495	0.162871	-0.0687129	0.335149	-0.309208	-0.216337	-2.0701	0.0273267	0.266238	0.141881	-0.0250495	0.606931	-0.29505	0.225644	0.10198	0.630594	-1.24525	0.364951	0.00524752	-0.00910891	0.0740594	0.300792	0.0988119	0.0388119	-0.163564	0.0481188	0.0918812	-0.554356	-0.203366	-0.0442574	-0.165842
0.489505	0.297327	-0.164653	-0.434554	-0.00881188	-0.0574257	0.134653	-0.0717822	0.313861	-0.249604	-0.31198	-1.75475	-0.00574257	-0.104752	0.307723	-0.228812	0.621188	-0.204554	0.0993069	0.127921	0.639307	-0.963465	0.36802	-0.00059406	-0.0613861	0.166535	0.36505	-0.0633663	0.0653465	0.0137624	0.0610891	0.228416	-0.306238	-0.280792	-0.0717822	-0.311881
0.184752	0.0389109	-0.0260396	-0.39901	0.0115842	0.135049	0.138713	0.0223762	0.134951	-0.307426	-0.20802	-1.8897	-0.010396	0.254851	0.249901	-0.259109	0.221089	-0.284455	0.203069	0.186436	0.836139	-0.83099	0.441782	0.0529703	-0.122673	0.107525	0.253762	0.125347	0.0592079	-0.0576238	0.0775248	0.356139	-0.0878218	-0.0991089	-0.392376	-0.269505
0.280297	0.059901	-0.230594	-0.425347	-0.11901	0.0457426	0.141188	-0.113168	0.0276238	-0.405842	0.0438614	-1.85347	-0.0766337	0.323168	0.156436	-0.16604	0.581089	-0.134059	0.0774257	0.121485	0.589604	-0.257921	0.223663	-0.171287	-0.0451485	0.23	0.230792	0.184752	0.204554	0.0237624	-0.00792079	0.330099	0.250099	-0.170495	-0.0442574	-0.126535
0.0959406	0.0850495	0.0936634	-0.334158	0.059901	0.0478218	0.112673	0.0727723	-0.0805941	-0.336139	-0.236436	-1.82812	-0.108713	0.274257	-0.0164356	-0.250792	0.372475	-0.111188	-0.0341584	0.178416	0.743366	-0.31396	0.288218	-0.0459406	0.0257426	0.0818812	0.26604	0.212871	0.134951	-0.147426	-0.0242574	0.371584	0.125743	0.070198	-0.0148515	-0.11198
0.289406	-0.109901	0.0654455	-0.270099	-0.231485	0.05	0.235446	-0.0927723	-0.0121782	-0.404554	-0.146436	-1.9803	0.167228	0.285446	-0.303366	-0.277624	0.505149	-0.0592079	0.309901	0.204653	0.596535	-0.149307	0.260693	-0.150297	-0.155941	0.304951	0.392871	0.060396	-0.0630693	-0.114554	0.152475	0.100594	0.155149	-0.186337	0.0160396	-0.284356
0.144653	-0.306139	0.136238	-0.665446	-0.243465	0.05	0.238218	-0.277426	-0.132574	-0.332376	-0.0170297	-1.89248	-0.0274257	0.326337	-0.387228	0.00732673	0.45198	0.150891	-0.0257426	0.242871	0.503069	-0.0584158	0.070396	0.00722772	-0.0909901	0.118119	0.499703	-0.069901	0.145149	-0.195446	0.196436	0.168713	0.0805941	-0.104059	0.0166337	-0.050198
[truncated: 55,326 more rows]

## Sheet: ED Figure 7G
dark a 1 to 1.5	dark a 1.5 to 3	dark a 3 to 10	dark a 10 to 20	dark a > 20	dark b 1 to 1.5	dark b 1.5 to 3	dark b 3 to 10	dark b 10 to 20	dark b > 20	laser 1 to 1.5	laser 1.5 to 3	laser 3 to 10	laser 10 to 20	laser > 20	cal 1 to 1.5	cal 1.5 to 3	cal 3 to 10	cal 10 to 20	cal > 20
[truncated: 15 more rows]

[truncated: 4 more sheets: ED Figure 7H, ED Figure 7I, ED Figure 7J, ED Figure 7K]
