# Supplementary material for: All-optical closed-loop voltage clamp for precise control of muscles and neurons in live animals
Source: Research Square preprint supplement (doi:10.21203/rs.3.rs-1505565/v1), 2023-03-29
Supplement: Supplementary file 17 [file f8b3e80db53baa285e020473.xlsx]

## Sheet: ED Figure 10A
Time (s)	F (raw)	F (background-corrected)	dF/F0	Grinder status
0	26279.7	15909.3	9.28	0
0.01	26221.9	15857.4	8.92	0
0.03	26252.5	15965.4	9.67	0
0.04	26195.9	15848.8	8.86	0
0.06	26160.3	15844.2	8.83	0
0.07	26167	15845.3	8.84	0
0.09	26204	15885.9	9.12	0
0.1	26103.8	15809.1	8.59	0
0.12	26206.8	15899.5	9.21	0
0.13	26130.9	15911.4	9.29	0
0.15	26155.7	15836	8.78	0
0.16	26134	15842.8	8.82	0
0.17	26135.3	15825.2	8.7	0
0.19	26151.5	15932.7	9.44	0
0.2	26085	15834.1	8.76	0
0.22	26062.2	15820	8.67	0
0.23	26111.6	15859.4	8.94	0
0.25	26094.8	15841.5	8.81	0
0.26	26108.4	15891.2	9.16	0
0.28	26108.7	15879	9.07	0
0.29	26103.5	15870.2	9.01	0
0.3	26094.7	15881	9.09	0
0.32	26076	15847.5	8.85	0
0.33	26079.2	15846.2	8.85	0
0.35	26127.9	15876.4	9.05	0
0.36	26159.2	15842.7	8.82	0
0.38	26127.5	15853.9	8.9	0
0.39	26145.6	15917.6	9.34	0
0.41	26171.3	15947.8	9.54	0
0.42	26186.8	15987.8	9.82	0
0.44	26138	15927.6	9.41	0
0.45	26180.6	15977.1	9.75	0
0.46	26146	15928.7	9.41	0
0.48	26196.2	15973.5	9.72	0
0.49	26132.8	15870.5	9.01	0
0.51	26056.1	15848.1	8.86	0
0.52	26094.6	15875.2	9.05	0
0.54	26020.3	15894.5	9.18	0
0.55	26040.4	15873	9.03	0
0.57	25994.9	15800.3	8.53	0
0.58	25983.8	15832.8	8.75	0
0.59	25998.8	15788	8.45	0
0.61	25929.1	15752.3	8.2	0
0.62	25980.6	15778.9	8.38	0
0.64	25932.4	15702.5	7.86	0
0.65	25921.1	15794.9	8.49	0
0.67	25889.5	15762.6	8.27	0
0.68	25973.5	15821.4	8.68	0
0.7	25888.4	15731.2	8.06	0
0.71	25832.6	15785.6	8.43	0
0.73	25853.3	15718.3	7.97	0
0.74	25871.7	15708.3	7.9	0
0.75	25834.3	15723.2	8	0
0.77	25783.2	15637.3	7.41	0
0.78	25764.9	15615.7	7.26	0
0.8	25752	15597	7.13	0
0.81	25738.1	15645.4	7.47	0
0.83	25708.8	15544.9	6.78	0
0.84	25657.7	15529.5	6.67	0
0.86	25645.9	15474.7	6.29	0
0.87	25586	15374.5	5.61	0
0.88	25622.5	15437.5	6.04	0
0.9	25631.3	15508.1	6.52	0
0.91	25584.6	15475.5	6.3	0
0.93	25592.2	15423.5	5.94	0
0.94	25571.2	15430.6	5.99	0
0.96	25611	15425.3	5.96	0
0.97	25535.7	15310.7	5.17	0
0.99	25572.2	15461	6.2	0
1	25506.8	15339.6	5.37	0
1.02	25437	15273.8	4.91	0
1.03	25476.4	15347.3	5.42	0
1.04	25392.2	15264.2	4.85	0
1.06	25397.9	15221.5	4.56	0
1.07	25339.8	15196.1	4.38	0
1.09	25361	15122.9	3.88	0
1.1	25246.5	15027.5	3.22	0
1.12	25247.5	15075.1	3.55	0
1.13	25230.5	15094.3	3.68	0
1.15	25218.4	15076.9	3.56	0
1.16	25169.2	15053.6	3.4	0
1.18	25147.4	14995.6	3	0
1.19	25169.9	15064.2	3.48	0
1.2	25095.6	14895	2.31	0
1.22	25098.5	14906.2	2.39	0
1.23	25042.2	14809.5	1.73	0
1.25	25056.3	14878.3	2.2	0
1.26	25039.6	14967.2	2.81	0
1.28	25091.2	14916	2.46	0
1.29	25098.4	14978.2	2.88	0
1.31	25100.2	14964	2.79	0
1.32	25092.5	14990.6	2.97	0
1.33	25076.2	14909.3	2.41	0
1.35	25056.7	14848.6	1.99	0
1.36	25067.4	14939.9	2.62	0
1.38	25039	14822.2	1.81	0
1.39	25051.3	14924.4	2.51	0
1.41	25021.7	14902.5	2.36	0
1.42	25036.7	14941.4	2.63	0
1.44	24955.9	14819.4	1.79	0
1.45	24929.7	14822.7	1.82	0
1.47	24884.9	14763.3	1.41	0
1.48	24872.2	14743.9	1.28	0
1.49	24894.1	14756.7	1.36	0
1.51	24868.6	14757.8	1.37	0
1.52	24794.7	14741.5	1.26	0
1.54	24795.1	14714.1	1.07	0
1.55	24793.4	14703.9	1	0
1.57	24804.2	14658.2	0.69	0
1.58	24808.1	14718.9	1.1	0
1.6	24744.7	14658.4	0.69	0
1.61	24767.2	14701.8	0.99	0
1.62	24801.9	14716.6	1.09	0
1.64	24746	14679.2	0.83	0
1.65	24755.6	14665.3	0.73	0
1.67	24730.6	14646.8	0.61	0
1.68	24767.8	14682.7	0.85	0
1.7	24720.5	14625.5	0.46	0
1.71	24778.7	14673	0.79	0
1.73	24693.6	14641.8	0.57	0
1.74	24756.2	14650.8	0.64	0
1.76	24743	14696.8	0.95	0
1.77	24747.2	14684.7	0.87	0
1.78	24682.2	14586	0.19	0
1.8	24695	14681.3	0.84	0
1.81	24652	14675.1	0.8	0
1.83	24636.9	14596.5	0.26	0
1.84	24707.2	14747.7	1.3	0
1.86	24638.1	14606	0.33	0
1.87	24615.7	14499.5	-0.4	0
1.89	24553.6	14496.8	-0.42	0
1.9	24624.2	14574.3	0.11	0
1.91	24586.1	14522.5	-0.25	0
1.93	24548.9	14411.1	-1.01	0
1.94	24594.8	14501.6	-0.39	0
1.96	24579.1	14515.1	-0.3	0
1.97	24534.7	14457.8	-0.69	0
1.99	24539.3	14491.4	-0.46	0
2	24554.8	14522	-0.25	0
2.02	24545.6	14436.1	-0.84	0
2.03	24516.8	14482.9	-0.52	0
2.05	24463.5	14385.2	-1.19	0
2.06	24459.7	14403	-1.07	0
2.07	24495.6	14422.9	-0.93	0
2.09	24444.5	14411.2	-1.01	0
2.1	24470.2	14375.7	-1.25	0
2.12	24442.6	14461.6	-0.66	0
2.13	24421.2	14386.1	-1.18	0
2.15	24430.4	14513.2	-0.31	0
2.16	24409.8	14416.1	-0.98	0
2.18	24427.3	14402	-1.07	0
2.19	24403.4	14390.2	-1.15	0
2.21	24430.6	14425.9	-0.91	0
2.22	24391.6	14405.5	-1.05	0
2.23	24361.6	14417.6	-0.97	0
2.25	24378.8	14358.9	-1.37	0
2.26	24360	14404.9	-1.05	0
2.28	24309.5	14335	-1.53	0
2.29	24388.5	14359.4	-1.37	0
2.31	24356.8	14374.2	-1.26	0
2.32	24289	14300.3	-1.77	0
2.34	24342.7	14389.9	-1.16	0
2.35	24282.1	14320.4	-1.63	0
2.36	24337.4	14356.9	-1.38	0
2.38	24338	14302.8	-1.76	0
2.39	24267.8	14267.7	-2	0
2.41	24244.5	14295.3	-1.81	0
2.42	24299.2	14329.7	-1.57	0
2.44	24262.8	14279.9	-1.91	0
2.45	24240.4	14275.8	-1.94	0
2.47	24238.7	14204.9	-2.43	0
2.48	24224.3	14243	-2.17	0
2.5	24284	14316.5	-1.66	0
2.51	24257.2	14291.7	-1.83	0
2.52	24265	14278	-1.93	0
2.54	24239.3	14255	-2.08	0
2.55	24183.7	14249.2	-2.12	0
2.57	24239	14304.2	-1.75	0
2.58	24215.8	14296	-1.8	0
2.6	24288.4	14370.6	-1.29	0
2.61	24228.7	14309.6	-1.71	0
2.63	24251.9	14364.8	-1.33	0
2.64	24265.1	14336.4	-1.52	0
2.65	24218.5	14350.2	-1.43	0
2.67	24202.3	14276.6	-1.93	0
2.68	24239.9	14294.8	-1.81	0
2.7	24225.4	14268	-1.99	0
2.71	24258.8	14387	-1.18	0
2.73	24258.4	14252.9	-2.1	0
2.74	24218.2	14285.4	-1.87	0
2.76	24275.9	14271.5	-1.97	0
2.77	24237.1	14270.9	-1.97	0
2.79	24239.3	14311.4	-1.7	0
2.8	24192.2	14303.8	-1.75	0
2.81	24201.1	14304.6	-1.74	0
2.83	24222.8	14337.9	-1.51	0
2.84	24234.1	14397.2	-1.11	0
2.86	24255.6	14326.5	-1.59	0
2.87	24202.3	14323.2	-1.62	0
2.89	24282.8	14357.2	-1.38	0
2.9	24281	14409	-1.03	0
2.92	24242	14368.2	-1.31	0
2.93	24277.5	14409.9	-1.02	0
2.94	24213.1	14348.2	-1.44	0
2.96	24192.4	14376.7	-1.25	0
2.97	24226.3	14266	-2.01	0
2.99	24248.8	14420.7	-0.95	0
3	24245.7	14364.1	-1.33	0
3.02	24226.5	14321.5	-1.63	0
3.03	24243.3	14375	-1.26	0
3.05	24266	14355.2	-1.4	0
3.06	24281	14377.8	-1.24	0
3.08	24226.3	14302	-1.76	0
3.09	24213.7	14394.7	-1.12	0
3.1	24217.8	14340.2	-1.5	0
3.12	24229	14307.2	-1.72	0
3.13	24218.2	14336.2	-1.53	0
3.15	24262.1	14439.5	-0.82	0
3.16	24226.6	14398.7	-1.1	0
3.18	24311.4	14477.4	-0.56	0
3.19	24208.1	14345.4	-1.46	0
3.21	23949.2	14489.2	-0.47	0
3.22	24054.7	14639.6	0.56	0
3.24	24422.5	14939.3	2.62	0
3.25	24790.4	15266	4.86	0
3.26	25014	15517.7	6.59	0
3.28	25074.3	15627.6	7.35	0
3.29	25120.6	15679.9	7.7	0
3.31	25168.9	15691.2	7.78	0
3.32	25159.9	15703.3	7.86	0
3.34	25201.1	15764.3	8.28	0
3.35	25147.5	15681.3	7.71	0
3.37	25187.2	15660.1	7.57	0
3.38	25248	15816.4	8.64	0
3.39	25217	15728.8	8.04	0
3.41	25204.9	15829.8	8.73	0
3.42	25291.6	15841.8	8.82	0
3.44	25294.8	15873.8	9.04	0
3.45	25337.2	15905.9	9.26	0
3.47	25365.1	15917.5	9.34	0
3.48	25387.4	15884.4	9.11	0
3.5	25403.8	15956.2	9.6	0
3.51	25398.7	15958.5	9.62	0
3.53	25391.5	15991	9.84	0
3.54	25425	15969.4	9.69	0
3.55	25493.3	16057.9	10.3	0
3.57	25429.8	16051.8	10.26	0
3.58	25450	16056.2	10.29	0
3.6	25454	16104.1	10.62	0
3.61	25447.1	16051.1	10.25	0
3.63	25402	15979.8	9.76	0
3.64	25408.2	16009.7	9.97	0
3.66	25423.2	16063.2	10.34	0
3.67	25468.2	16086.1	10.49	0
3.68	25448.5	16048.3	10.23	0
3.7	25398.2	16008.6	9.96	0
3.71	25417.8	16039.1	10.17	0
3.73	25401.1	16053.4	10.27	0
3.74	25457.6	16033.7	10.13	0
3.76	25402.6	16018.3	10.03	0
3.77	25409.9	16023.9	10.07	0
3.79	25360.6	16005.8	9.94	0
3.8	25380.5	16079.3	10.45	0
3.82	25376.3	16002.4	9.92	2.5
3.83	25415.3	16041.1	10.18	2.5
3.84	25324.6	15976	9.74	2.5
3.86	25280.6	15929.6	9.42	2.5
3.87	25340.9	16070	10.38	2.5
3.89	25331.4	16027.5	10.09	2.5
3.9	25293.7	16027.7	10.09	2.5
3.92	25255.6	15962.1	9.64	2.5
3.93	25282.8	15961.7	9.64	2.5
3.95	25262.2	15967.8	9.68	2.5
3.96	25259.4	15929.4	9.42	2.5
3.97	25278.3	15986.4	9.81	2.5
3.99	25248	15922.7	9.37	2.5
4	25239.5	15918.6	9.34	2.5
4.02	25209	15916.5	9.33	2.5
4.03	25222.5	15927	9.4	2.5
4.05	25228	15977.6	9.75	2.5
4.06	25259.4	15948.5	9.55	2.5
4.08	25198.9	15886	9.12	2.5
4.09	25150.9	15845.8	8.84	2.5
4.11	25179.3	15880.1	9.08	2.5
4.12	25124.7	15813.7	8.62	2.5
4.13	25125.5	15831.4	8.74	2.5
4.15	25159	15865.1	8.98	2.5
4.16	25098.5	15845.6	8.84	2.5
4.18	25116.1	15912.9	9.3	2.5
4.19	25117.1	15813.9	8.62	2.5
4.21	25075.2	15832.2	8.75	2.5
4.22	25141.1	15869	9	2.5
4.24	25105.5	15849.8	8.87	2.5
4.25	25075.2	15843.9	8.83	2.5
4.27	25138.5	15872.2	9.03	2.5
4.28	25088.3	15844	8.83	2.5
4.29	25089.8	15817.8	8.65	2.5
4.31	25063.1	15812.4	8.61	2.5
4.32	25093.2	15798.9	8.52	2.5
4.34	25014.7	15839.1	8.8	2.5
4.35	25025.9	15795.9	8.5	2.5
4.37	25063.3	15838.7	8.79	2.5
4.38	25031.8	15774.1	8.35	2.5
4.4	25017.3	15794.6	8.49	2.5
4.41	25035.7	15866.5	8.99	2.5
4.42	25039.9	15840.9	8.81	2.5
4.44	24932.3	15752.2	8.2	2.5
4.45	24929.2	15753.1	8.21	2.5
4.47	24962.7	15767	8.3	2.5
4.48	24967.4	15743.4	8.14	2.5
4.5	24910.3	15686.9	7.75	2.5
4.51	24929.8	15741.8	8.13	2.5
4.53	24946.5	15721.3	7.99	2.5
4.54	24856.5	15699.7	7.84	2.5
4.56	24928.2	15698.2	7.83	2.5
4.57	24860	15672.5	7.65	2.5
4.58	24861.1	15722	7.99	2.5
4.6	24886.6	15717.8	7.96	2.5
4.61	24808	15649.9	7.5	2.5
4.63	24773.3	15541.5	6.75	2.5
4.64	24727.9	15553.1	6.83	2.5
4.66	24782.2	15593	7.11	2.5
4.67	24718.4	15527	6.65	2.5
4.69	24759.4	15600.2	7.16	2.5
4.7	24708.7	15533.4	6.7	2.5
4.71	24720.1	15500.4	6.47	2.5
4.73	24587.2	15234.7	4.65	2.5
4.74	22983	13461.7	-7.53	2.5
4.76	22872.8	13356	-8.26	2.5
4.77	22885.2	13381.4	-8.08	2.5
4.79	22964.3	13458.1	-7.56	2.5
4.8	22905	13418.4	-7.83	2.5
4.82	22861.3	13350	-8.3	2.5
4.83	22903.8	13333.5	-8.41	2.5
4.85	22798.2	13298.5	-8.65	2.5
4.86	22892.2	13366.7	-8.19	2.5
4.87	22863	13330.8	-8.43	2.5
4.89	22881.9	13359.8	-8.23	2.5
4.9	22921.5	13336.6	-8.39	2.5
4.92	22955.8	13424.3	-7.79	2.5
4.93	22895.9	13328	-8.45	2.5
4.95	22945.6	13421.1	-7.81	2.5
4.96	22915.4	13312.6	-8.56	2.5
4.98	22875.4	13323.1	-8.48	2.5
4.99	22869	13312	-8.56	2.5
5.01	22888.5	13284.8	-8.75	2.5
5.02	22908.2	13308.2	-8.59	2.5
5.03	22888.5	13352.3	-8.28	2.5
5.05	22948.1	13395.6	-7.99	2.5
5.06	22953.4	13369.5	-8.17	2.5
5.08	22989	13427.6	-7.77	2.5
5.09	22985.3	13426.9	-7.77	2.5
5.11	23006.4	13393.8	-8	2.5
5.12	23039.1	13442.5	-7.66	2.5
5.14	22973.1	13455.7	-7.57	2.5
5.15	23012.7	13415.5	-7.85	2.5
5.16	23068.5	13468.1	-7.49	2.5
5.18	23016.2	13472.2	-7.46	2.5
5.19	22980.2	13419.9	-7.82	2.5
5.21	22961.5	13368.3	-8.17	2.5
5.22	22950.3	13400.5	-7.95	2.5
5.24	22971.5	13371.8	-8.15	2.5
5.25	22950.4	13437	-7.7	2.5
5.27	22959.2	13364.6	-8.2	0
5.28	22991.8	13436.5	-7.71	0
5.3	23012.1	13504.5	-7.24	0
5.31	22995	13385.3	-8.06	0
5.32	22940.6	13331	-8.43	0
5.34	22912.6	13339.1	-8.37	0
5.35	22969	13348.3	-8.31	0
5.37	22930	13376.5	-8.12	0
5.38	22944.1	13428.3	-7.76	0
5.4	23003.1	13448.1	-7.63	0
5.41	22939.9	13457.5	-7.56	0
5.43	22927.9	13464.2	-7.52	0
5.44	22912	13351.6	-8.29	0
5.45	22914.3	13399.5	-7.96	0
5.47	22856.9	13334.3	-8.41	0
5.48	22914.6	13366.4	-8.19	0
5.5	22951	13405.7	-7.92	0
5.51	22952.7	13412.1	-7.87	0
5.53	22992.2	13479.5	-7.41	0
5.54	22983.5	13483.9	-7.38	0
5.56	23000.8	13520.2	-7.13	0
5.57	23059	13525	-7.1	0
5.59	23089.8	13588.9	-6.66	0
5.6	23112	13602	-6.57	0
5.61	23134.8	13547.7	-6.94	0
5.63	23161.1	13601.3	-6.57	0
5.64	23140.9	13601.6	-6.57	0
5.66	23176.3	13612.1	-6.5	0
5.67	23101.5	13595	-6.62	0
5.69	23165	13706	-5.85	0
5.7	23117.8	13665.2	-6.13	0
5.72	23034.7	13577.6	-6.74	0
5.73	23071.4	13561.1	-6.85	0
5.74	23055.3	13583.6	-6.7	0
5.76	23034.3	13549	-6.93	0
5.77	23004.4	13546.5	-6.95	0
5.79	23057	13557.4	-6.88	0
5.8	23022.1	13489.4	-7.34	0
5.82	22975.8	13457.5	-7.56	0
5.83	22992.1	13494.4	-7.31	0
5.85	22980	13424.4	-7.79	0
5.86	22908.1	13403.6	-7.93	0
5.88	22866.5	13395.7	-7.99	0
5.89	22826.8	13324.8	-8.47	0
5.9	22873.9	13375.5	-8.12	0
5.92	22783.1	13267	-8.87	0
5.93	22882.3	13349.5	-8.3	0
5.95	22797.7	13356.2	-8.26	0
5.96	22856.2	13335.9	-8.4	0
5.98	22819.6	13344.5	-8.34	0
5.99	22911	13454.9	-7.58	0
6.01	22857.6	13403.1	-7.94	0
6.02	22891.9	13344.7	-8.34	0
6.04	22949.5	13474.5	-7.44	0
6.05	22903.7	13398	-7.97	0
6.06	22867.2	13312.8	-8.56	0
6.08	22954.3	13493.1	-7.32	0
6.09	22954	13480.6	-7.4	0
6.11	22924.5	13433.6	-7.73	0
6.12	22948.5	13461.7	-7.53	0
6.14	22876.2	13359.6	-8.23	0
6.15	22878.8	13375.6	-8.12	0
6.17	22824.3	13310.3	-8.57	0
6.18	22804.3	13343.5	-8.34	0
6.19	22764.7	13251.3	-8.98	0
6.21	22711.8	13226.2	-9.15	0
6.22	22733.6	13202.2	-9.31	0
6.24	22732.9	13202	-9.32	0
6.25	22725.9	13239.5	-9.06	0
6.27	22711.5	13148.9	-9.68	0
6.28	22744.7	13209.5	-9.26	0
6.3	22746.8	13168.9	-9.54	0
6.31	22715.3	13248	-9	0
6.33	22672.2	13167.8	-9.55	0
6.34	22702.9	13200.2	-9.33	0
6.35	22696.4	13167.5	-9.55	0
6.37	22788.8	13213.4	-9.24	0
6.38	22712	13217.3	-9.21	0
6.4	22815.3	13264.4	-8.89	0
6.41	22791.9	13319.3	-8.51	0
6.43	22732.5	13213.9	-9.24	0
6.44	22768.6	13244.4	-9.02	0
6.46	22811	13285.3	-8.74	0
6.47	22795.5	13300.9	-8.64	0
6.48	22838.9	13311.1	-8.57	0
6.5	22762.5	13247.6	-9	0
6.51	22815	13237.5	-9.07	0
6.53	22814.6	13317.1	-8.53	0
6.54	22788.5	13320.4	-8.5	0
6.56	22818.5	13303.2	-8.62	0
6.57	22807.8	13298.2	-8.66	0
6.59	22860.5	13311.3	-8.57	0
6.6	22849.8	13324.9	-8.47	0
6.62	22890	13328.6	-8.45	0
6.63	22860.7	13332.3	-8.42	0
6.64	22886.3	13384.3	-8.06	0
6.66	22869.2	13335	-8.4	0
6.67	22847.2	13292.1	-8.7	0
6.69	22807.7	13259.6	-8.92	0
6.7	22860.3	13237.1	-9.08	0
6.72	22861	13256.2	-8.94	0
6.73	22840.4	13318.7	-8.52	0
6.75	22796.4	13297.1	-8.66	0
6.76	22825.4	13257.3	-8.94	0
6.77	22794.7	13274	-8.82	0
6.79	22789.2	13268.3	-8.86	0
6.8	22774.1	13229.9	-9.13	0
6.82	22882.6	13377.7	-8.11	0
6.83	22926.1	13390.6	-8.02	0
6.85	22933.7	13433.6	-7.73	0
6.86	22968.8	13443.9	-7.65	0
6.88	22910.9	13434.8	-7.72	0
6.89	22941.7	13419.9	-7.82	0
6.91	22927.1	13378.7	-8.1	0
6.92	22917.5	13318.4	-8.52	0
6.93	22933	13398.5	-7.97	0
6.95	22922.3	13340	-8.37	0
6.96	22877.8	13394.5	-7.99	0
6.98	22917.2	13399.8	-7.96	0
6.99	22868	13363.5	-8.21	0
7.01	22956.3	13425.4	-7.78	0
7.02	22921.9	13344.9	-8.33	0
7.04	22931.2	13411.5	-7.88	0
7.05	22928.9	13378.1	-8.11	0
7.07	22882.3	13433.9	-7.72	0
7.08	22874.8	13378.5	-8.1	0
7.09	22904.2	13387.5	-8.04	0
7.11	22901	13389.7	-8.03	0
7.12	22920.7	13382	-8.08	0
7.14	22938.7	13384	-8.07	0
7.15	22917.9	13394.6	-7.99	0
7.17	22895.4	13328.1	-8.45	0
7.18	22950.1	13428.1	-7.76	0
7.2	22959.5	13395	-7.99	0
7.21	22961.3	13441.3	-7.67	0
7.22	22964.6	13505.4	-7.23	0
7.24	22947.5	13440.5	-7.68	0
7.25	22984.6	13413.9	-7.86	0
7.27	22992	13456	-7.57	0
7.28	22956.3	13466	-7.5	0
7.3	23004.6	13497.1	-7.29	0
7.31	23025.5	13456.5	-7.57	0
7.33	22929.2	13437.3	-7.7	0
7.34	22985.8	13522.4	-7.12	0
7.36	22907.5	13401.3	-7.95	0
7.37	22960.7	13477.2	-7.43	0
7.38	22924.9	13464.2	-7.52	0
7.4	22895.4	13386.3	-8.05	0
7.41	22894.2	13401.4	-7.95	0
7.43	22971.9	13453.8	-7.59	0
7.44	22948	13379.3	-8.1	0
7.46	22948.7	13436.2	-7.71	0
7.47	22950.7	13433	-7.73	0
7.49	22986.4	13570.2	-6.79	0
7.5	23001.3	13502.4	-7.25	0
7.51	23026.2	13542.2	-6.98	0
7.53	23004.8	13522.9	-7.11	0
7.54	23040	13614.4	-6.48	0
7.56	22885.2	13623.5	-6.42	0
7.57	22880.2	13753.4	-5.53	0
7.59	23096.7	13942.4	-4.23	0
7.6	23541	14423.8	-0.92	0
7.62	23765.8	14659.7	0.7	0
7.63	23891	14781.7	1.53	0
7.65	23999.6	14868.6	2.13	0
7.66	24060.4	14955.6	2.73	0
7.67	24125.9	15037.2	3.29	0
7.69	24159.9	15079.5	3.58	0
7.7	24109.1	14996.9	3.01	0
7.72	24005	14937.4	2.6	0
7.73	24015.1	14914.8	2.45	0
7.75	24044.2	14933.8	2.58	0
7.76	24055.1	14942.3	2.64	0
7.78	24052.5	14932.6	2.57	0
7.79	24106.2	14964.2	2.79	0
7.8	24155.6	15023.3	3.19	0
7.82	24177.2	15078.7	3.57	0
7.83	24190	15078.4	3.57	0
7.85	24176.1	15090.9	3.66	0
7.86	24196.5	15073.1	3.54	0
7.88	24231.8	15062.1	3.46	0
7.89	24221.3	15135.4	3.96	0
7.91	24205.7	15045.9	3.35	0
7.92	24175.1	15067.9	3.5	0
7.94	24175.6	15040.1	3.31	0
7.95	24219.2	15087.8	3.64	0
7.96	24212	15171	4.21	0
7.98	24192	15133.3	3.95	0
7.99	24197.8	15114.6	3.82	0
8.01	24183.3	15052.4	3.39	0
8.02	24187.3	15127.2	3.91	2.5
8.04	24211.1	15144.5	4.03	2.5
8.05	24226.2	15162.3	4.15	2.5
8.07	24195.7	15068.8	3.51	2.5
8.08	24171.5	15062.6	3.46	2.5
8.1	24205.5	15212.7	4.5	2.5
8.11	24222.9	15105.3	3.76	2.5
8.12	24158.4	15156	4.11	2.5
8.14	24214.3	15123.4	3.88	2.5
8.15	24216.7	15125.5	3.9	2.5
8.17	24295.9	15233.9	4.64	2.5
8.18	24260.6	15189.3	4.33	2.5
8.2	24303.3	15227.4	4.6	2.5
8.21	24354	15257.5	4.8	2.5
8.23	24361.4	15297	5.07	2.5
8.24	24350.6	15338.3	5.36	2.5
8.25	24332.4	15321.5	5.24	2.5
8.27	24288	15281.1	4.96	2.5
8.28	24361.3	15343.8	5.4	2.5
8.3	24292.1	15260.8	4.83	2.5
8.31	24328.5	15301.3	5.1	2.5
8.33	24292.8	15301.2	5.1	2.5
8.34	24297.2	15288.2	5.01	2.5
8.36	24298	15250.5	4.75	2.5
8.37	24239.3	15257.3	4.8	2.5
8.39	24341.2	15346.1	5.41	2.5
8.4	24283.8	15256.7	4.8	2.5
8.41	24348.5	15331.6	5.31	2.5
8.43	24278.2	15312.4	5.18	2.5
8.44	24321.7	15337.6	5.35	2.5
8.46	24246.2	15213.8	4.5	2.5
8.47	24278.1	15339.9	5.37	2.5
8.49	24300.3	15260.9	4.83	2.5
8.5	24305.9	15381.7	5.66	2.5
8.52	24346.6	15340.2	5.37	2.5
8.53	24297	15396.7	5.76	2.5
8.54	24280.7	15367.9	5.56	2.5
8.56	24282.5	15339.6	5.37	2.5
8.57	24260.6	15340.1	5.37	2.5
8.59	24297.7	15295.8	5.07	2.5
8.6	24308.6	15399.8	5.78	2.5
8.62	24261.8	15247.6	4.73	2.5
8.63	24239.1	15256.9	4.8	2.5
8.65	24236.4	15270.8	4.89	2.5
8.66	24198.1	15222.2	4.56	2.5
8.68	24175.1	15295.1	5.06	2.5
8.69	24169.5	15236.7	4.66	2.5
8.7	24235.7	15295.6	5.06	2.5
8.72	24209	15245.8	4.72	2.5
8.73	24233.6	15267.2	4.87	2.5
8.75	24205.3	15245.9	4.72	2.5
8.76	24153.1	15253.8	4.78	2.5
8.78	24160.1	15257.5	4.8	2.5
8.79	24149.1	15200.8	4.41	2.5
8.81	24156.3	15188.3	4.33	2.5
8.82	24172.1	15203.1	4.43	2.5
8.83	24161.5	15196	4.38	2.5
8.85	24124	15198.3	4.4	2.5
8.86	24105.5	15171.5	4.21	2.5
8.88	24167.4	15184.1	4.3	2.5
8.89	24072.2	15131.7	3.94	2.5
8.91	24074.7	15137	3.98	2.5
8.92	24063.2	15159.9	4.13	2.5
8.94	24072.8	15120.9	3.86	2.5
8.95	24061.3	15086.1	3.63	2.5
8.97	24028.9	15118.3	3.85	2.5
8.98	24061.6	15106	3.76	2.5
8.99	24065.9	15114.9	3.82	2.5
9.01	24002.9	15096.8	3.7	2.5
9.02	24037.4	15095.6	3.69	2.5
9.04	24010.6	15098.8	3.71	2.5
9.05	24013.9	15127.8	3.91	2.5
9.07	23972.2	15039.5	3.3	2.5
9.08	23924.8	15029.1	3.23	2.5
9.1	23973.2	15073.8	3.54	2.5
9.11	24014.5	15116.8	3.84	2.5
9.13	23965.5	15068.2	3.5	2.5
9.14	24030.5	15091.3	3.66	2.5
9.15	23953.5	15073.9	3.54	2.5
9.17	23894.5	15047.6	3.36	2.5
9.18	23945.5	15087.9	3.64	2.5
9.2	23919.7	15068.1	3.5	2.5
9.21	23833.9	14935.4	2.59	2.5
9.23	23920.7	15031.9	3.25	2.5
9.24	23868.8	15013.2	3.12	2.5
9.26	23870.8	15007	3.08	2.5
9.27	23918.4	15072.1	3.53	2.5
9.28	23930	15053.5	3.4	2.5
9.3	22959.2	13702.7	-5.88	2.5
9.31	22194.9	12990.1	-10.77	2.5
9.33	22192.5	12970.4	-10.91	2.5
9.34	22201.7	12970.6	-10.91	2.5
9.36	22160.4	12906.9	-11.34	2.5
9.37	22113.4	12909.2	-11.33	2.5
9.39	22107.1	12854.3	-11.7	2.5
9.4	22175.9	12966.3	-10.94	2.5
9.42	22204.6	13023.7	-10.54	2.5
9.43	22214	12972.4	-10.89	2.5
9.44	22164.1	12976.2	-10.87	2.5
9.46	22193.1	12922.8	-11.23	2.5
9.47	22183.2	12932.9	-11.16	2.5
9.49	22288.9	13039	-10.44	2.5
9.5	22276.8	12987.4	-10.79	2.5
9.52	22315.9	13046.6	-10.38	2.5
9.53	22247.5	13041.1	-10.42	2.5
9.55	22276	13014.5	-10.6	2.5
9.56	22275.8	12984	-10.81	2.5
9.57	22300.2	13058.9	-10.3	2.5
9.59	22282.8	12996.8	-10.73	2.5
9.6	22368.5	13061.1	-10.28	2.5
9.62	22333.1	13055.8	-10.32	2.5
9.63	22335.4	13051.2	-10.35	2.5
9.65	22321.6	13026.3	-10.52	2.5
9.66	22390.1	13169.6	-9.54	2.5
9.68	22415.5	13107.3	-9.97	2.5
9.69	22437.8	13139.2	-9.75	2.5
9.71	22447.5	13155.4	-9.64	2.5
9.72	22481.6	13183.9	-9.44	0
9.73	22445.5	13238.5	-9.07	0
9.75	22542.6	13260.7	-8.91	0
9.76	22510.4	13215.1	-9.23	0
9.78	22476.3	13252.5	-8.97	0
9.79	22550.9	13311.7	-8.56	0
9.81	22492.3	13207	-9.28	0
9.82	22542.1	13266.3	-8.87	0
9.84	22512.8	13309.8	-8.58	0
9.85	22540.1	13291.5	-8.7	0
9.86	22558.9	13233.5	-9.1	0
9.88	22538.8	13309.8	-8.58	0
9.89	22542.6	13243.2	-9.03	0
9.91	22524.4	13269.5	-8.85	0
9.92	22550.6	13293.1	-8.69	0
9.94	22568.7	13287.9	-8.73	0
9.95	22591.4	13364	-8.2	0
9.97	22589.3	13350.8	-8.29	0
9.98	22625.5	13369.5	-8.17	0
10	22618.9	13308.9	-8.58	0
10.01	22640	13332.1	-8.42	0
10.02	22685.3	13437	-7.7	0
10.04	22674.7	13437.6	-7.7	0
10.05	22736.6	13465.9	-7.5	0
10.07	22744.2	13468.5	-7.49	0
10.08	22820.5	13517.5	-7.15	0
10.1	22774.7	13486	-7.37	0
10.11	22808.7	13450.3	-7.61	0
10.13	22836.1	13525	-7.1	0
10.14	22902.1	13584.8	-6.69	0
10.16	22909	13618.1	-6.46	0
10.17	22907.6	13690.3	-5.96	0
10.18	22985.1	13722.9	-5.74	0
10.2	22884.4	13612.8	-6.49	0
10.21	22864.4	13586.4	-6.68	0
10.23	22869	13557.2	-6.88	0
10.24	22849	13551.2	-6.92	0
10.26	22833.8	13553.9	-6.9	0
10.27	22837.9	13541	-6.99	0
10.29	22886.4	13609.3	-6.52	0
10.3	22876.5	13567.5	-6.81	0
10.31	22875.6	13528	-7.08	0
10.33	22857.8	13550.6	-6.92	0
10.34	22876.9	13597.7	-6.6	0
10.36	22860.4	13590.8	-6.65	0
10.37	22946.1	13654.8	-6.21	0
10.39	22946.3	13643.7	-6.28	0
10.4	22953.4	13633.5	-6.35	0
10.42	22954.3	13657.4	-6.19	0
10.43	22977.2	13690.2	-5.96	0
10.45	22946.4	13671	-6.09	0
10.46	22950.5	13717.9	-5.77	0
10.47	22970	13657.3	-6.19	0
10.49	22921	13635.2	-6.34	0
10.5	22960.8	13623.9	-6.42	0
10.52	22975.6	13647.3	-6.26	0
10.53	22892.5	13572.5	-6.77	0
10.55	22924.9	13599.6	-6.58	0
10.56	22960.7	13645.6	-6.27	0
10.58	22906.3	13596.8	-6.6	0
10.59	22935.5	13579.4	-6.72	0
10.6	22964.5	13624.9	-6.41	0
10.62	22923.1	13615	-6.48	0
10.63	22913.9	13637.7	-6.32	0
10.65	22969.9	13707	-5.85	0
10.66	22915	13632.1	-6.36	0
10.68	22943.2	13591.8	-6.64	0
10.69	22934.5	13641.9	-6.29	0
10.71	22964.5	13600.9	-6.58	0
10.72	22934.7	13606.6	-6.54	0
10.74	22923.3	13606	-6.54	0
10.75	22994.4	13689.9	-5.97	0
10.76	22975.4	13670.8	-6.1	0
10.78	22998.3	13731.6	-5.68	0
10.79	22982.4	13696.3	-5.92	0
10.81	22968.3	13681.6	-6.02	0
10.82	22953.8	13688.7	-5.97	0
10.84	22986.7	13737.1	-5.64	0
10.85	23028.8	13783.8	-5.32	0
10.87	23082.7	13838.5	-4.94	0
10.88	23019.8	13788.4	-5.29	0
10.89	23047.6	13783.1	-5.32	0
10.91	23064.5	13805.4	-5.17	0
10.92	23098.2	13796	-5.24	0
10.94	23120.5	13861.5	-4.79	0
10.95	23162.9	13861	-4.79	0
10.97	23078.3	13834.1	-4.97	0
10.98	23165	13959.9	-4.11	0
11	23168.3	13873.4	-4.7	0
11.01	23171	13874.3	-4.7	0
11.03	23188	13921.4	-4.37	0
11.04	23168.4	13909.2	-4.46	0
11.05	23147.5	13901.7	-4.51	0
11.07	23192.2	13897.4	-4.54	0
11.08	23159.7	13921.5	-4.37	0
11.1	23202	13908.4	-4.46	0
11.11	23121.2	13886.4	-4.62	0
11.13	23230.6	13926.7	-4.34	0
11.14	23199.5	13921.7	-4.37	0
11.16	23204.8	13909.1	-4.46	0
11.17	23275.1	14007.3	-3.79	0
11.19	23250.3	13959.2	-4.12	0
11.2	23278.4	14005.5	-3.8	0
11.21	23233.5	13998.6	-3.84	0
11.23	23258.1	13989.7	-3.91	0
11.24	23317.4	14029.3	-3.63	0
11.26	23274.7	14028.2	-3.64	0
11.27	23278.2	14020.1	-3.7	0
11.29	23213.9	13958.1	-4.12	0
11.3	23252.6	13988.1	-3.92	0
11.32	23205.9	14006	-3.79	0
11.33	23264.2	14029.2	-3.63	0
11.34	23277.6	13967.4	-4.06	0
11.36	23279.8	14063.5	-3.4	0
11.37	23402.2	14078.2	-3.3	0
11.39	23341.3	14049.1	-3.5	0
11.4	23359	14056.8	-3.44	0
11.42	23318.4	14047.4	-3.51	0
11.43	23421	14120.1	-3.01	0
11.45	23420.8	14142	-2.86	0
11.46	23393.4	14147.5	-2.82	0
11.48	23401	14106.5	-3.1	0
11.49	23395.6	14147.3	-2.82	0
11.5	23413.9	14145.2	-2.84	0
11.52	23380	14104.1	-3.12	0
11.53	23387.7	14113.2	-3.06	0
11.55	23387.6	14068	-3.37	0
11.56	23370.8	14091.3	-3.21	0
11.58	23288.2	14032.2	-3.61	0
11.59	23294	14012.2	-3.75	0
11.61	23290	14033	-3.61	0
11.62	23320.1	14079.9	-3.29	0
11.63	23238	14026.5	-3.65	0
11.65	23254	14072	-3.34	0
11.66	23320.3	14035	-3.59	0
11.68	23320.1	14061.3	-3.41	0
11.69	23232.7	13986.5	-3.93	0
11.71	23299.4	13983.7	-3.95	0
11.72	23287.5	14007.7	-3.78	0
11.74	23305.6	14031	-3.62	0
11.75	23309	14014.7	-3.73	0
11.77	23333.3	14060.8	-3.42	0
11.78	23378.4	14153.3	-2.78	0
11.79	23361.6	14093.3	-3.19	0
11.81	23361.3	14108.8	-3.09	0
11.82	23316.4	14059.1	-3.43	0
11.84	23311.2	14056.6	-3.45	0
11.85	23356.6	14090.4	-3.21	0
11.87	23329.7	14126	-2.97	0
11.88	23367.9	14130.3	-2.94	0
11.9	23279.4	14073.5	-3.33	0
11.91	23081.5	14184.8	-2.57	0
11.92	23233.2	14372.1	-1.28	0
11.94	23519.7	14575.2	0.12	0
11.95	23885.1	14970.9	2.83	0
11.97	24020.3	15133.2	3.95	0
11.98	24052.7	15159.1	4.13	0
12	24052	15140	4	0
12.01	24108.3	15192.7	4.36	0
12.03	24095	15170.3	4.2	0
12.04	24145.5	15249.8	4.75	0
12.06	24144.5	15256.5	4.8	0
12.07	24108.5	15260.9	4.83	0
12.08	24113.8	15221.8	4.56	0
12.1	24132.6	15258.2	4.81	0
12.11	24162.5	15319.4	5.23	0
12.13	24085.5	15135	3.96	0
12.14	24166.4	15284.2	4.99	0
12.16	24172.6	15315.3	5.2	0
12.17	24197	15360.6	5.51	0
12.19	24174.2	15288.7	5.02	0
12.2	24219.8	15364	5.53	0
12.22	24295.4	15425.3	5.96	0
12.23	24260.5	15377.8	5.63	0
12.24	24221.5	15388.2	5.7	0
12.26	24236.2	15354.6	5.47	0
12.27	24271.8	15406.9	5.83	0
12.29	24278.9	15341.6	5.38	0
12.3	24257.2	15410	5.85	0
12.32	24271.3	15433.1	6.01	2.5
12.33	24279.3	15489.8	6.4	2.5
12.35	24208.3	15343	5.39	2.5
12.36	24231.1	15360.5	5.51	2.5
12.37	24185	15320.5	5.24	2.5
12.39	24228.4	15398	5.77	2.5
12.4	24228.6	15388.3	5.7	2.5
12.42	24223.9	15382.2	5.66	2.5
12.43	24183	15346.5	5.41	2.5
12.45	24207.8	15413.8	5.88	2.5
12.46	24201.5	15367.8	5.56	2.5
12.48	24243.5	15421.3	5.93	2.5
12.49	24225.7	15439.2	6.05	2.5
12.51	24241.8	15406.3	5.82	2.5
12.52	24300.9	15448.5	6.11	2.5
12.53	24283.7	15467.6	6.25	2.5
12.55	24267.6	15427	5.97	2.5
12.56	24276.7	15491.4	6.41	2.5
12.58	24182.8	15379.8	5.64	2.5
12.59	24200.8	15383.3	5.67	2.5
12.61	24202.2	15376.9	5.62	2.5
12.62	24187.3	15413	5.87	2.5
12.64	24182	15381.8	5.66	2.5
12.65	24181.4	15425.1	5.95	2.5
12.66	24175.1	15343	5.39	2.5
12.68	24209.8	15414.6	5.88	2.5
12.69	24289.8	15479.6	6.33	2.5
12.71	24269.7	15528.7	6.67	2.5
12.72	24298.8	15460.6	6.2	2.5
12.74	24309.2	15487.7	6.38	2.5
12.75	24303.1	15480	6.33	2.5
12.77	24238.7	15398.1	5.77	2.5
12.78	24234.4	15437.7	6.04	2.5
12.8	24263.2	15509.8	6.54	2.5
12.81	24239.7	15457	6.17	2.5
12.82	24271	15484.4	6.36	2.5
12.84	24258	15462.4	6.21	2.5
12.85	24249.3	15401.7	5.79	2.5
12.87	24272	15502.3	6.48	2.5
12.88	24252.5	15437.3	6.04	2.5
12.9	24200.6	15481.1	6.34	2.5
12.91	24188.5	15451.8	6.14	2.5
12.93	24214.1	15477.8	6.32	2.5
12.94	24218.6	15495.8	6.44	2.5
12.95	24169.9	15405	5.82	2.5
12.97	24121.9	15388.7	5.7	2.5
12.98	24148.9	15455	6.16	2.5
13	24210.9	15500.4	6.47	2.5
13.01	24168.1	15433.4	6.01	2.5
13.03	24187	15469.4	6.26	2.5
13.04	24122.7	15393.2	5.73	2.5
13.06	24168	15441.8	6.07	2.5
13.07	24148.8	15413.6	5.88	2.5
13.09	24126.3	15359.3	5.5	2.5
13.1	24138	15359.9	5.51	2.5
13.11	24069	15299.5	5.09	2.5
13.13	24105.8	15357.7	5.49	2.5
13.14	24123.5	15330.2	5.3	2.5
13.16	24075.8	15349.3	5.43	2.5
13.17	24087.5	15297	5.07	2.5
13.19	23990.5	15268.5	4.88	2.5
13.2	24018.2	15294	5.05	2.5
13.22	24025.5	15274	4.92	2.5
13.23	24017.8	15265.7	4.86	2.5
13.25	24050.1	15304.4	5.12	2.5
13.26	24008.9	15212.5	4.49	2.5
13.27	24113	15381	5.65	2.5
13.29	24001.1	15276.8	4.94	2.5
13.3	24044.6	15363.7	5.53	2.5
13.32	23983.9	15238	4.67	2.5
13.33	24033.6	15314.3	5.19	2.5
13.35	23969.7	15220.5	4.55	2.5
13.36	23993.7	15343.4	5.39	2.5
13.38	23954.2	15229.1	4.61	2.5
13.39	23952.2	15258.4	4.81	2.5
13.4	23950	15224.1	4.57	2.5
13.42	23948.9	15237.5	4.66	2.5
13.43	23938.6	15230.7	4.62	2.5
13.45	23987.5	15220	4.55	2.5
13.46	23974.5	15292.7	5.04	2.5
13.48	23915.5	15248.5	4.74	2.5
13.49	23885.8	15177	4.25	2.5
13.51	23928	15227.2	4.59	2.5
13.52	23932.4	15200.4	4.41	2.5
13.54	23881.4	15182.2	4.29	2.5
13.55	23916.6	15170	4.2	2.5
13.56	23859.7	15120	3.86	2.5
13.58	23902.6	15160.5	4.14	2.5
13.59	23819.9	15135	3.96	2.5
13.61	23893.4	15196.6	4.38	2.5
13.62	23811.1	15104.7	3.75	2.5
13.64	23735.1	15069.1	3.51	2.5
13.65	23753.8	15056.6	3.42	2.5
13.67	23808.7	15096.7	3.7	2.5
13.68	23810.8	15143.6	4.02	2.5
13.69	23840.2	15149.8	4.06	2.5
13.71	23843.6	15142.4	4.01	2.5
13.72	23814.5	15142.4	4.01	2.5
13.74	23744.5	15017.2	3.15	2.5
13.75	23771.8	15060	3.45	2.5
13.77	23772.1	15045.2	3.34	2.5
13.78	23762.7	15093.1	3.67	2.5
13.8	23766	15100.6	3.73	2.5
13.81	23727.5	15018.4	3.16	2.5
13.83	23693.6	14994.7	3	2.5
13.84	23664.1	14941.8	2.63	2.5
13.85	23661.7	14903	2.37	2.5
13.87	23652	14938.4	2.61	2.5
13.88	23616.3	14907.2	2.4	2.5
13.9	23602.9	14916.4	2.46	2.5
13.91	23567.4	14885.8	2.25	2.5
13.93	23630.4	14959.7	2.76	2.5
13.94	23607.8	14896.3	2.32	2.5
13.96	23598.8	14937.1	2.6	2.5
13.97	23537.8	14848.1	1.99	2.5
13.98	23523.5	14880.5	2.21	2.5
14	23552.4	14865.3	2.11	2.5
14.01	23519	14852.8	2.02	2.5
14.03	23538.9	14898.3	2.34	2.5
14.04	23566.1	14879.3	2.2	2.5
14.06	23530.2	14839.5	1.93	2.5
14.07	23505.1	14856.5	2.05	2.5
14.09	23495.2	14797.7	1.64	2.5
14.1	23437.3	14819.1	1.79	2.5
14.12	23464.5	14794.3	1.62	2.5
14.13	23469.6	14812.3	1.74	2.5
14.14	23548.3	14930.4	2.56	2.5
14.16	23494.4	14815.9	1.77	2.5
14.17	23477.4	14826.7	1.84	2.5
14.19	23441.7	14796.8	1.64	2.5
14.2	23429.2	14772	1.47	2.5
14.22	23412.3	14779.6	1.52	2.5
14.23	23401.8	14817.4	1.78	2.5
14.25	23368.2	14712.5	1.06	2.5
14.26	23407.4	14756.5	1.36	2.5
14.28	23403.2	14800.9	1.67	2.5
14.29	23392.9	14724	1.14	2.5
14.3	23355.8	14698.1	0.96	2.5
14.32	23326.7	14697.2	0.95	2.5
14.33	23386.8	14763.2	1.41	2.5
14.35	23331.7	14682.3	0.85	2.5
14.36	23365.4	14759.6	1.38	2.5
14.38	23338.1	14683.5	0.86	2.5
14.39	23296.1	14668.7	0.76	2.5
14.41	23295.8	14666	0.74	2.5
14.42	23240.3	14639.2	0.56	2.5
14.43	23287.8	14721.9	1.12	2.5
14.45	23242.5	14596.9	0.27	2.5
14.46	23234.7	14587.6	0.2	2.5
14.48	23231.5	14564	0.04	2.5
14.49	23255.5	14600.5	0.29	2.5
14.51	23218.5	14574.4	0.11	2.5
14.52	23191.4	14566.6	0.06	2.5
14.54	23162.9	14508.2	-0.34	2.5
14.55	23226.8	14541.4	-0.12	2.5
14.57	23152.1	14500.8	-0.4	2.5
14.58	23194.7	14585.8	0.19	2.5
14.59	23196.8	14590.1	0.22	2.5
14.61	23184.2	14622.9	0.44	2.5
14.62	23144.9	14497.1	-0.42	2.5
14.64	23112.3	14440	-0.81	2.5
14.65	23174.9	14487.7	-0.49	2.5
14.67	23122.8	14508.3	-0.34	2.5
14.68	23113	14514.1	-0.3	2.5
14.7	23105.3	14441.7	-0.8	2.5
14.71	23094.9	14312	-1.69	2.5
14.72	21884.7	12909.8	-11.32	2.5
14.74	21422.4	12478.1	-14.29	2.5
14.75	21402.7	12449.5	-14.49	2.5
14.77	21431.3	12504.1	-14.11	2.5
14.78	21396.2	12515.2	-14.03	2.5
14.8	21461.8	12512.7	-14.05	2.5
14.81	21491.1	12516.1	-14.03	2.5
14.83	21464.4	12462.1	-14.4	2.5
14.84	21439.2	12491	-14.2	2.5
14.86	21452.7	12487.6	-14.22	2.5
14.87	21513.9	12545.1	-13.83	2.5
14.88	21506.4	12548.3	-13.81	2.5
14.9	21588.1	12605	-13.42	2.5
14.91	21631.2	12662.6	-13.02	2.5
14.93	21621.2	12688.2	-12.85	2.5
14.94	21668.4	12713.4	-12.67	2.5
14.96	21687.9	12712.2	-12.68	2.5
14.97	21751	12783.8	-12.19	2.5
14.99	21726.8	12739.6	-12.49	2.5
15	21757	12781.5	-12.2	2.5
15.02	21741.7	12725.6	-12.59	0
15.03	21742.9	12804	-12.05	0
15.04	21785.1	12724.2	-12.6	0
15.06	21859.6	12790.9	-12.14	0
15.07	21801	12797.7	-12.09	0
15.09	21823.4	12820.1	-11.94	0
15.1	21894.8	12928.2	-11.2	0
15.12	21877	12901.9	-11.38	0
15.13	21928	12939.2	-11.12	0
15.15	21925	12951.5	-11.04	0
15.16	21955.5	12975	-10.88	0
15.17	21985.6	12962.1	-10.96	0
15.19	22008.6	13026.9	-10.52	0
15.2	22050.5	13059.3	-10.3	0
15.22	22023.3	12994.3	-10.74	0
15.23	22096.7	13034.9	-10.46	0
15.25	22059.5	13073.8	-10.2	0
15.26	22056.9	13070.2	-10.22	0
15.28	22104	13118.7	-9.89	0
15.29	22122.6	13091.9	-10.07	0
15.31	22178.5	13169.6	-9.54	0
15.32	22204	13217.7	-9.21	0
15.33	22233.4	13238	-9.07	0
15.35	22266.8	13204.7	-9.3	0
15.36	22300.4	13288.3	-8.72	0
15.38	22318.2	13306.3	-8.6	0
15.39	22362	13321.2	-8.5	0
15.41	22300.5	13296.3	-8.67	0
15.42	22438.4	13425.8	-7.78	0
15.44	22462.4	13448.7	-7.62	0
15.45	22404.6	13401	-7.95	0
15.46	22479.9	13420.1	-7.82	0
15.48	22504.8	13502.3	-7.25	0
15.49	22487.7	13515.3	-7.16	0
15.51	22519.5	13527.5	-7.08	0
15.52	22560.7	13568.6	-6.8	0
15.54	22623.2	13636	-6.34	0
15.55	22622.6	13623.5	-6.42	0
15.57	22655.6	13643.2	-6.29	0
15.58	22681.5	13612.9	-6.49	0
15.6	22711.5	13613.5	-6.49	0
15.61	22697.1	13655.1	-6.2	0
15.62	22697	13675	-6.07	0
15.64	22704.3	13706.9	-5.85	0
15.65	22715.1	13723.3	-5.74	0
15.67	22682.6	13662.3	-6.15	0
15.68	22687.7	13646.2	-6.27	0
15.7	22726.8	13690	-5.96	0
15.71	22695	13653.6	-6.21	0
15.73	22752.2	13770.3	-5.41	0
15.74	22803.5	13782.2	-5.33	0
15.75	22719.3	13672.1	-6.09	0
15.77	22724.2	13731.1	-5.68	0
15.78	22742.8	13721.5	-5.75	0
15.8	22770.3	13714.3	-5.8	0
15.81	22756.9	13789.4	-5.28	0
15.83	22781.4	13746.3	-5.58	0
15.84	22736.9	13769.4	-5.42	0
15.86	22806	13744.9	-5.59	0
15.87	22789.5	13758.9	-5.49	0
15.89	22826.1	13811.3	-5.13	0
15.9	22844.9	13834.2	-4.97	0
15.91	22812.7	13744.3	-5.59	0
15.93	22818.7	13800.5	-5.21	0
15.94	22781.9	13808.3	-5.15	0
15.96	22843.5	13822	-5.06	0
15.97	22867.3	13852.8	-4.85	0
15.99	22865.7	13827.3	-5.02	0
16	22841.7	13829.8	-5	0
16.02	22920.5	13921.4	-4.38	0
16.03	22900.7	13840.6	-4.93	0
16.05	22909.3	13807.9	-5.15	0
16.06	22928.6	13878	-4.67	0
16.07	22965.6	13929.3	-4.32	0
16.09	22948	13939	-4.25	0
16.1	22959.6	13936.1	-4.27	0
16.12	22954.7	13903.3	-4.5	0
16.13	22935.4	13902.2	-4.51	0
16.15	22996.2	13935.9	-4.28	0
16.16	23021.6	14006.5	-3.79	0
16.18	22980	13945.2	-4.21	0
16.19	23025.9	13984.2	-3.94	0
16.2	23035.4	14029.3	-3.63	0
16.22	23052.1	14002.6	-3.82	0
16.23	23045.1	13965.6	-4.07	0
16.25	23047.2	14010.8	-3.76	0
16.26	23069.1	14011.9	-3.75	0
16.28	23119.5	14090.9	-3.21	0
16.29	23049.7	14073.5	-3.33	0
16.31	23112.3	14107.2	-3.1	0
16.32	23045.3	14039.6	-3.56	0
16.34	23019	13976.8	-3.99	0
16.35	23019.4	13968.9	-4.05	0
16.36	23060.8	13983.9	-3.95	0
16.38	23057.9	14048.4	-3.5	0
16.39	23058.1	13998.4	-3.85	0
16.41	23055.6	14060.2	-3.42	0
16.42	23022.9	14021.3	-3.69	0
16.44	23069.5	14033.9	-3.6	0
16.45	23047.9	14032	-3.61	0
16.47	23033.4	13961.3	-4.1	0
16.48	23015.4	13977.1	-3.99	0
16.49	23090.7	14033	-3.61	0
16.51	23065.9	14055.1	-3.46	0
16.52	23119	14105.7	-3.11	0
16.54	23122.2	14084.4	-3.26	0
16.55	23091.3	14086.7	-3.24	0
16.57	23129.6	14067.8	-3.37	0
16.58	23092	13995	-3.87	0
16.6	23096.7	14021.6	-3.69	0
16.61	23139.7	14101.8	-3.14	0
16.63	23151.1	14064.6	-3.39	0
16.64	23154.6	14084.4	-3.26	0
16.65	23183	14134.5	-2.91	0
16.67	23171.2	14155.2	-2.77	0
16.68	23188.8	14156.8	-2.76	0
16.7	23179.2	14110.5	-3.08	0
16.71	23249.9	14221.1	-2.32	0
16.73	23246.3	14199.1	-2.47	0
16.74	23265	14181.9	-2.59	0
16.76	23243.2	14222.6	-2.31	0
16.77	23285.3	14284.5	-1.88	0
16.78	23302.2	14248.7	-2.13	0
16.8	23300.3	14262.1	-2.03	0
16.81	23286.8	14255.6	-2.08	0
16.83	23312	14294.5	-1.81	0
16.84	23345.2	14285.6	-1.87	0
16.86	23343	14317.2	-1.66	0
16.87	23362	14296.1	-1.8	0
16.89	23313	14269.7	-1.98	0
16.9	23350.8	14261.1	-2.04	0
16.92	23403.7	14370	-1.29	0
16.93	23403.8	14287	-1.86	0
16.94	23484.1	14419.8	-0.95	0
16.96	23281.9	14470.9	-0.6	0
16.97	23260.9	14531.8	-0.18	0
16.99	23392.6	14676.9	0.81	0
17	23651.1	14956.7	2.74	0
17.02	23917.4	15232.5	4.63	0
17.03	24070.8	15394.1	5.74	0
17.05	24135.9	15434.5	6.02	0
17.06	24163.1	15464.8	6.23	0
17.08	24121.5	15443.9	6.08	0
17.09	24147.8	15518.5	6.6	0
17.1	24135.1	15460.4	6.2	0
17.12	24104.1	15420.3	5.92	0
17.13	24090.4	15391.1	5.72	0
17.15	24019.5	15291.2	5.03	0
17.16	24049.6	15303.6	5.12	0
17.18	24052	15410.9	5.86	0
17.19	24018.4	15323.9	5.26	0
17.21	24021.2	15317.6	5.22	0
17.22	24063.2	15361.8	5.52	0
17.23	24070.5	15370.2	5.58	0
17.25	24062.5	15396.6	5.76	0
17.26	24041.8	15392.8	5.73	0
17.28	24112.2	15383.5	5.67	0
17.29	24159.4	15447.7	6.11	0
17.31	24134.2	15442.4	6.07	2.5
17.32	24158.6	15504	6.5	2.5
17.34	24179	15486.6	6.38	2.5
17.35	24159.2	15491.5	6.41	2.5
17.37	24140	15438.5	6.05	2.5
17.38	24157.3	15525.4	6.64	2.5
17.39	24153	15485.1	6.37	2.5
17.41	24095	15467.9	6.25	2.5
17.42	24127.1	15450.7	6.13	2.5
17.44	24043.8	15365.4	5.54	2.5
17.45	24056.6	15374.5	5.61	2.5
17.47	24045.8	15425	5.95	2.5
17.48	24114	15387.5	5.7	2.5
17.5	24085.8	15430.4	5.99	2.5
17.51	24085.7	15457.9	6.18	2.5
17.52	24045.8	15423.2	5.94	2.5
17.54	24090.8	15487.5	6.38	2.5
17.55	24132	15450.5	6.13	2.5
17.57	24098.6	15490.3	6.4	2.5
17.58	24116.2	15420.2	5.92	2.5
17.6	24105.9	15527.7	6.66	2.5
17.61	24076.5	15415.6	5.89	2.5
17.63	24049.1	15409	5.84	2.5
17.64	24088.4	15428.9	5.98	2.5
17.66	24113	15513.8	6.56	2.5
17.67	24083.6	15430.3	5.99	2.5
17.68	24090	15530.9	6.68	2.5
17.7	24097.6	15425.1	5.95	2.5
17.71	24054.3	15421.1	5.93	2.5
17.73	24029.8	15328.6	5.29	2.5
17.74	24032.5	15421.2	5.93	2.5
17.76	24044.7	15412	5.86	2.5
17.77	24031	15371.5	5.59	2.5
17.79	24011.2	15442.2	6.07	2.5
17.8	23998.7	15387.8	5.7	2.5
17.81	24006.5	15433.4	6.01	2.5
17.83	24033.6	15388.7	5.7	2.5
17.84	24052.9	15468.8	6.25	2.5
17.86	24015.1	15423.3	5.94	2.5
17.87	23967.2	15363.1	5.53	2.5
17.89	23969.8	15389.2	5.71	2.5
17.9	23987.1	15409.5	5.85	2.5
17.92	23949.9	15433	6.01	2.5
17.93	23998.1	15408.8	5.84	2.5
17.95	23968.4	15407.6	5.83	2.5
17.96	24021	15335.2	5.34	2.5
17.97	23962.2	15392.4	5.73	2.5
17.99	23953.3	15372.8	5.59	2.5
18	23912.9	15355.1	5.47	2.5
18.02	23962.5	15372.8	5.59	2.5
18.03	23945.7	15338.1	5.36	2.5
18.05	23933.1	15332	5.31	2.5
18.06	23954.6	15362.6	5.52	2.5
18.08	23942.3	15321.7	5.24	2.5
18.09	23931.5	15352.7	5.46	2.5
18.11	23935.2	15323.5	5.26	2.5
18.12	23897.5	15363.5	5.53	2.5
18.13	23881.9	15321.5	5.24	2.5
18.15	23928	15387.8	5.7	2.5
18.16	23856.9	15281	4.96	2.5
18.18	23921.4	15318.5	5.22	2.5
18.19	23900	15244.1	4.71	2.5
18.21	23896.7	15285.5	4.99	2.5
18.22	23878.8	15326.1	5.27	2.5
18.24	23857.1	15258	4.81	2.5
18.25	23895.6	15351.7	5.45	2.5
18.26	23818.9	15256.3	4.79	2.5
18.28	23803.8	15229.8	4.61	2.5
18.29	23805.8	15260.4	4.82	2.5
18.31	23779.1	15207.2	4.46	2.5
18.32	23786.6	15232.2	4.63	2.5
18.34	23723.4	15087.4	3.63	2.5
18.35	23760.1	15248	4.74	2.5
18.37	23728.1	15197.6	4.39	2.5
18.38	23740.2	15237.3	4.66	2.5
18.4	23723.8	15162.4	4.15	2.5
18.41	23709.7	15140	4	2.5
18.42	23714.1	15189.9	4.34	2.5
18.44	23776	15223	4.57	2.5
18.45	23788	15205.3	4.44	2.5
18.47	23771.6	15194.9	4.37	2.5
18.48	23787.9	15207.1	4.46	2.5
18.5	23780.1	15169.1	4.2	2.5
18.51	23796.7	15231.9	4.63	2.5
18.53	23765.6	15185	4.31	2.5
18.54	23798.3	15229.7	4.61	2.5
18.55	23755.4	15278.2	4.94	2.5
18.57	23758.7	15151.4	4.07	2.5
18.58	23741.9	15185.2	4.31	2.5
18.6	23708	15141.5	4.01	2.5
18.61	23718.4	15196.2	4.38	2.5
18.63	23671.4	15152.1	4.08	2.5
18.64	23691.6	15107.8	3.77	2.5
18.66	23674.3	15174.7	4.23	2.5
18.67	23646.7	15143.8	4.02	2.5
18.69	23684.4	15111.7	3.8	2.5
18.7	23611.1	15078.5	3.57	2.5
18.71	23568.9	14963.3	2.78	2.5
18.73	23598.2	15102.7	3.74	2.5
18.74	23565.3	15083.6	3.61	2.5
18.76	23622.5	15076.8	3.56	2.5
18.77	23624.7	15046.6	3.35	2.5
18.79	23607.2	15095.3	3.69	2.5
18.8	23541.8	15052.1	3.39	2.5
18.82	23606.5	15110.1	3.79	2.5
18.83	23594.9	15078	3.57	2.5
18.84	23542.2	15029.9	3.24	2.5
18.86	23566.1	14975.4	2.87	2.5
18.87	23490.8	14975.5	2.87	2.5
18.89	23508.5	14994	2.99	2.5
18.9	23444.9	14905.3	2.38	2.5
18.92	23455	14965.6	2.8	2.5
18.93	23418.7	14964.2	2.79	2.5
18.95	23438.9	14895.3	2.31	2.5
18.96	23434.5	14886.1	2.25	2.5
18.98	23419.9	14906.6	2.39	2.5
18.99	23450.7	14901.7	2.36	2.5
19	23433.8	14907.2	2.4	2.5
19.02	23411.4	14812.5	1.75	2.5
19.03	23410.3	14882.5	2.23	2.5
19.05	23372.4	14880.3	2.21	2.5
19.06	23449.1	14866.4	2.12	2.5
19.08	23369.3	14901.3	2.36	2.5
19.09	23379.8	14869.3	2.14	2.5
19.11	23435.7	14923.9	2.51	2.5
19.12	23393.7	14850.8	2.01	2.5
19.14	23395.2	14915.6	2.45	2.5
19.15	23383.3	14875.8	2.18	2.5
19.16	23383.9	14893.5	2.3	2.5
19.18	23336.3	14807.4	1.71	2.5
19.19	23308.5	14850.2	2.01	2.5
19.21	23261.9	14759.2	1.38	2.5
19.22	23264.6	14762.1	1.4	2.5
19.24	23295.3	14812.6	1.75	2.5
19.25	23281.2	14803.2	1.68	2.5
19.27	23287.7	14785.2	1.56	2.5
19.28	23196.4	14699.1	0.97	2.5
19.29	23206.3	14734.1	1.21	2.5
19.31	23193.9	14753	1.34	2.5
19.32	23208.6	14736.5	1.22	2.5
19.34	23202.7	14688	0.89	2.5
19.35	23184.5	14708	1.03	2.5
19.37	23203.9	14653.9	0.66	2.5
19.38	23119	14338.7	-1.51	2.5
19.4	21750.1	12936.3	-11.14	2.5
19.41	21632.6	12852.6	-11.72	2.5
19.43	21669.9	12923.6	-11.23	2.5
19.44	21747.1	12923.3	-11.23	2.5
19.45	21663.5	12815	-11.97	2.5
19.47	21664.2	12822.3	-11.92	2.5
19.48	21683.3	12792.7	-12.13	2.5
19.5	21682.9	12859.6	-11.67	2.5
19.51	21729.7	12874.5	-11.57	2.5
19.53	21741.7	12928.9	-11.19	2.5
19.54	21773.5	12917	-11.27	2.5
19.56	21827.5	13023.1	-10.55	2.5
19.57	21912.2	13087	-10.11	2.5
19.58	21925.3	13078.9	-10.16	2.5
19.6	21920.6	13065.6	-10.25	2.5
19.61	21941.1	13068.7	-10.23	0
19.63	21985.4	13114.5	-9.92	0
19.64	21969.5	13079	-10.16	0
19.66	21990.6	13126.1	-9.84	0
19.67	22027.1	13225.6	-9.15	0
19.69	22048.9	13230.7	-9.12	0
19.7	22098.5	13220.9	-9.19	0
19.72	22134.6	13287.2	-8.73	0
19.73	22153.7	13275.4	-8.81	0
19.74	22191.8	13372.2	-8.15	0
19.76	22204.4	13338.1	-8.38	0
19.77	22218.6	13358.4	-8.24	0
19.79	22193.8	13308.1	-8.59	0
19.8	22254.1	13351.6	-8.29	0
19.82	22306.4	13435.7	-7.71	0
19.83	22334.6	13478.9	-7.41	0
19.85	22367.6	13467.9	-7.49	0
19.86	22341.6	13446.3	-7.64	0
19.87	22418.6	13509.9	-7.2	0
19.89	22457.2	13557.4	-6.88	0
19.9	22468.6	13613.2	-6.49	0
19.92	22519.2	13643.2	-6.29	0
19.93	22542.8	13625.2	-6.41	0
19.95	22517.2	13617.5	-6.46	0
19.96	22570.8	13689.9	-5.97	0
19.98	22627.1	13716.8	-5.78	0
19.99	22606.2	13668.7	-6.11	0
20.01	22638.3	13744.4	-5.59	0
20.02	22650.2	13750.8	-5.55	0
20.03	22682.9	13765.3	-5.45	0
20.05	22684.8	13758	-5.5	0
20.06	22678.5	13798.2	-5.22	0
20.08	22686.7	13807.7	-5.16	0
20.09	22682.6	13798.3	-5.22	0
20.11	22719.6	13836.5	-4.96	0
20.12	22767.5	13881	-4.65	0
20.14	22784	13895.3	-4.55	0
20.15	22803.9	13900.7	-4.52	0
20.17	22792.5	13885.4	-4.62	0
20.18	22870.8	13970.4	-4.04	0
20.19	22873.9	13964	-4.08	0
20.21	22805.4	13874.6	-4.7	0
20.22	22840.2	13868.3	-4.74	0
20.24	22799.9	13817.6	-5.09	0
20.25	22848.8	13876.9	-4.68	0
20.27	22829.1	13866.6	-4.75	0
20.28	22792.3	13879.3	-4.66	0
20.3	22813	13900.8	-4.52	0
20.31	22862.2	13906.3	-4.48	0
20.32	22856.7	13901.1	-4.51	0
20.34	22908.3	13997.5	-3.85	0
20.35	22883.7	13980.6	-3.97	0
20.37	22905.1	13885.4	-4.62	0
20.38	22902	13944.3	-4.22	0
20.4	22979.2	14072.8	-3.34	0
20.41	22943.6	14027.9	-3.64	0
20.43	22989.5	13994.2	-3.87	0
20.44	22953.5	13965.7	-4.07	0
20.46	22983.5	14034.2	-3.6	0
20.47	22965	14025	-3.66	0
20.48	23033.8	14092.2	-3.2	0
20.5	22980	14025.5	-3.66	0
20.51	23023.4	14056.6	-3.45	0
20.53	22967.7	14052.7	-3.47	0
20.54	23027.8	14023.5	-3.67	0
20.56	23016.2	14101.9	-3.14	0
20.57	23003.1	14077.7	-3.3	0
20.59	23067.2	14080.9	-3.28	0
20.6	23061.2	14154.5	-2.77	0
20.61	23128.9	14182.5	-2.58	0
20.63	23107.8	14226.2	-2.28	0
20.64	23103	14136.6	-2.9	0
20.66	23151.5	14224.2	-2.29	0
20.67	23099.6	14184.2	-2.57	0
20.69	23119.3	14206.2	-2.42	0
20.7	23124.2	14152	-2.79	0
20.72	23063.6	14127.9	-2.96	0
20.73	23179.1	14274.6	-1.95	0
20.75	23114.8	14136.7	-2.9	0
20.76	23161.5	14243.4	-2.16	0
20.77	23207.7	14257.6	-2.07	0
20.79	23245.4	14252	-2.1	0
20.8	23242.1	14329.9	-1.57	0
20.82	23269.1	14352.5	-1.41	0
20.83	23239.7	14301.6	-1.76	0
20.85	23241	14270.3	-1.98	0
20.86	23254.8	14267	-2	0
20.88	23309	14313.8	-1.68	0
20.89	23238.7	14375.9	-1.25	0
20.9	23213.4	14260	-2.05	0
20.92	23230.5	14349.5	-1.43	0
20.93	23230.1	14330.9	-1.56	0
20.95	23245	14282.5	-1.89	0
20.96	23225.2	14278.5	-1.92	0
20.98	23246.6	14305.3	-1.74	0
20.99	23240.4	14242	-2.17	0
21.01	23235.4	14251.2	-2.11	0
21.02	23277.3	14310	-1.71	0
21.04	23267.9	14335.9	-1.53	0
21.05	23287.9	14324.7	-1.6	0
21.06	23254.5	14280.7	-1.91	0
21.08	23345.8	14423.3	-0.93	0
21.09	23362.2	14454.4	-0.71	0
21.11	23399.2	14460.1	-0.67	0
21.12	23353.8	14397.2	-1.11	0
21.14	23426.1	14502	-0.39	0
21.15	23374.5	14415.5	-0.98	0
21.17	23428	14505.1	-0.37	0
21.18	23402.5	14446	-0.77	0
21.2	23432.8	14487.6	-0.49	0
21.21	23445.6	14499.4	-0.4	0
21.22	23432.5	14454	-0.72	0
21.24	23387.9	14454.7	-0.71	0
21.25	23392.4	14445.1	-0.78	0
21.27	23446.8	14493.6	-0.44	0
21.28	23380.3	14455.9	-0.7	0
21.3	23430.8	14489.7	-0.47	0
21.31	23412.5	14455.6	-0.71	0
21.33	23379.8	14450.2	-0.74	0
21.34	23373.6	14422.7	-0.93	0
21.35	23317.3	14395.3	-1.12	0
21.37	23343.1	14480.1	-0.54	0
21.38	23386.4	14415.9	-0.98	0
21.4	23418.6	14481.9	-0.52	0
21.41	23400.5	14381.8	-1.21	0
21.43	23361.2	14445.8	-0.77	0
21.44	23297.7	14445.5	-0.77	0
21.46	23113	14496	-0.43	0
21.47	23237.8	14654.2	0.66	0
21.49	23387.5	14758.2	1.37	0
21.5	23640	15041	3.32	0
21.51	23851.1	15271.8	4.9	0
21.53	23968.1	15340.3	5.37	0
21.54	23977.7	15412	5.86	0
21.56	23993.1	15342.5	5.39	0
21.57	24045	15445.8	6.1	0
21.59	24024.3	15470.5	6.27	0
21.6	24038	15430.4	5.99	0
21.62	23963.6	15331.6	5.31	0
21.63	23957.7	15373	5.6	0
21.64	23946.3	15359.4	5.5	0
21.66	23958.3	15324.4	5.26	0
21.67	24050.2	15468.5	6.25	0
21.69	23978.7	15406.1	5.82	0
21.7	24057.6	15512	6.55	0
21.72	24078.5	15495.5	6.44	2.5
21.73	24079.7	15483.5	6.35	2.5
21.75	24039.8	15464.7	6.23	2.5
21.76	24095.9	15557.8	6.87	2.5
21.78	24046.1	15439.6	6.05	2.5
21.79	24034.2	15434.1	6.02	2.5
21.8	24049.3	15464.9	6.23	2.5
21.82	24050	15494.2	6.43	2.5
21.83	24089.1	15536.9	6.72	2.5
21.85	24083.9	15516.5	6.58	2.5
21.86	24015.4	15531.8	6.69	2.5
21.88	24048.8	15467.9	6.25	2.5
21.89	23939.4	15443.7	6.08	2.5
21.91	23901.6	15358.6	5.5	2.5
21.92	23999.4	15529.8	6.67	2.5
21.93	23951.2	15441.9	6.07	2.5
21.95	23968.3	15413.1	5.87	2.5
21.96	23975.8	15413.1	5.87	2.5
21.98	23914.1	15398.7	5.77	2.5
21.99	23995.9	15443.3	6.08	2.5
22.01	23987.1	15389.5	5.71	2.5
22.02	24029.1	15448.1	6.11	2.5
22.04	23940.3	15403.5	5.81	2.5
22.05	23991.9	15458.1	6.18	2.5
22.07	23940.7	15389.4	5.71	2.5
22.08	23985.6	15435.1	6.02	2.5
22.09	23963.6	15404.6	5.81	2.5
22.11	24006.2	15510.7	6.54	2.5
22.12	23977	15373.5	5.6	2.5
22.14	23988.8	15372.3	5.59	2.5
22.15	24000.7	15481.6	6.34	2.5
22.17	24001	15473.1	6.28	2.5
22.18	24004.5	15450	6.12	2.5
22.2	23900.2	15386.8	5.69	2.5
22.21	23965.5	15471.6	6.27	2.5
22.23	23980.1	15535.7	6.71	2.5
22.24	23991.8	15501.2	6.48	2.5
22.25	23924	15398.3	5.77	2.5
22.27	23924.3	15410.4	5.85	2.5
22.28	23861.5	15370	5.58	2.5
22.3	23922	15405.3	5.82	2.5
22.31	23837	15337.3	5.35	2.5
22.33	23908.4	15382.4	5.66	2.5
22.34	23878.6	15307.6	5.15	2.5
22.36	23882.3	15428.9	5.98	2.5
22.37	23827.5	15293.4	5.05	2.5
22.38	23868.5	15354	5.47	2.5
22.4	23899.1	15360.1	5.51	2.5
22.41	23879.9	15380.5	5.65	2.5
22.43	23856.1	15344	5.4	2.5
22.44	23821.4	15334.3	5.33	2.5
22.46	23857.9	15341.5	5.38	2.5
22.47	23825	15359.2	5.5	2.5
22.49	23833.8	15345.5	5.41	2.5
22.5	23863.9	15348.9	5.43	2.5
22.52	23842.8	15342.3	5.39	2.5
22.53	23805.1	15337.4	5.35	2.5
22.54	23766.5	15218.7	4.54	2.5
22.56	23796	15289.6	5.02	2.5
22.57	23777.4	15280.5	4.96	2.5
22.59	23802.9	15274.2	4.92	2.5
22.6	23837.3	15286.1	5	2.5
22.62	23816.4	15365.1	5.54	2.5
22.63	23779.7	15292.4	5.04	2.5
22.65	23708.6	15242.2	4.7	2.5
22.66	23807.8	15328.9	5.29	2.5
22.67	23779.2	15304	5.12	2.5
22.69	23733.8	15276.8	4.94	2.5
22.7	23763.2	15236.2	4.66	2.5
22.72	23702.3	15196	4.38	2.5
22.73	23708.8	15231.5	4.62	2.5
22.75	23683.5	15142.4	4.01	2.5
22.76	23715.4	15208	4.46	2.5
22.78	23660.5	15208.9	4.47	2.5
22.79	23706.1	15196.8	4.39	2.5
22.81	23639.5	15159.4	4.13	2.5
22.82	23686.6	15196.1	4.38	2.5
22.83	23644.8	15164.2	4.16	2.5
22.85	23577.6	15069.4	3.51	2.5
22.86	23665.8	15172.1	4.22	2.5
22.88	23576	15110.8	3.79	2.5
22.89	23619.1	15159.6	4.13	2.5
22.91	23594.5	15086.2	3.63	2.5
22.92	23545.5	15058	3.43	2.5
22.94	23601.3	15122.8	3.88	2.5
22.95	23556.8	15052	3.39	2.5
22.96	23578.3	15149.7	4.06	2.5
22.98	23581	15110.1	3.79	2.5
22.99	23587	15146.6	4.04	2.5
23.01	23578.7	15106.3	3.76	2.5
23.02	23579.5	15171.6	4.21	2.5
23.04	23549.8	15090	3.65	2.5
23.05	23542.6	15122.5	3.88	2.5
23.07	23546.8	15103	3.74	2.5
23.08	23526.6	15083.6	3.61	2.5
23.1	23548.4	15082.9	3.6	2.5
23.11	23533.4	15085.1	3.62	2.5
23.12	23523.4	15034.5	3.27	2.5
23.14	23507.6	15084.6	3.62	2.5
23.15	23488.9	15060.7	3.45	2.5
23.17	23529.7	15068.4	3.5	2.5
23.18	23491	15052.6	3.4	2.5
23.2	23506	15074.5	3.55	2.5
23.21	23511.5	15071.7	3.53	2.5
23.23	23531.4	15069.7	3.51	2.5
23.24	23425.6	14970.7	2.83	2.5
23.26	23476.6	15033.4	3.26	2.5
23.27	23485.2	15044.9	3.34	2.5
23.28	23461	14948.2	2.68	2.5
23.3	23471.6	15034.9	3.27	2.5
23.31	23490	15051.5	3.39	2.5
23.33	23408.3	14972.6	2.85	2.5
23.34	23412.5	14956.1	2.73	2.5
23.36	23381.1	14980.1	2.9	2.5
23.37	23386.4	14986.8	2.94	2.5
23.39	23375.8	14962.6	2.78	2.5
23.4	23358.4	14938.8	2.61	2.5
23.41	23296.7	14851.5	2.01	2.5
23.43	23263.8	14834	1.89	2.5
23.44	23232	14833.6	1.89	2.5
23.46	23271.2	14901	2.35	2.5
23.47	23297.6	14902	2.36	2.5
23.49	23299.2	14869.9	2.14	2.5
23.5	23302	14911.3	2.42	2.5
23.52	23274.5	14829.2	1.86	2.5
23.53	23242.7	14808.7	1.72	2.5
23.55	23282	14797.4	1.64	2.5
23.56	23256	14824.3	1.83	2.5
23.57	23254.1	14846	1.98	2.5
23.59	23246	14829.6	1.86	2.5
23.6	23267.3	14843.8	1.96	2.5
23.62	23242.2	14786.5	1.57	2.5
23.63	23279.3	14826.1	1.84	2.5
23.65	23244	14819.3	1.79	2.5
23.66	23243.4	14820.6	1.8	2.5
23.68	23223.1	14824.3	1.83	2.5
23.69	23221.7	14788.7	1.58	2.5
23.7	23289	14790.7	1.6	2.5
23.72	23248.9	14860.7	2.08	2.5
23.73	23188.3	14811.6	1.74	2.5
23.75	23210.5	14785.8	1.56	2.5
23.76	23235.7	14868.8	2.13	2.5
23.78	23179.2	14772	1.47	2.5
23.79	23141	14780.7	1.53	2.5
23.81	23062.4	14667.6	0.75	2.5
23.82	23118.4	14695.2	0.94	2.5
23.84	23114.8	14679.9	0.84	2.5
23.85	23088	14677.4	0.82	2.5
23.86	23078.2	14677.3	0.82	2.5
23.88	23002.3	14615.3	0.39	2.5
23.89	23052.2	14673	0.79	2.5
23.91	23041.7	14682.8	0.86	2.5
23.92	22997	14591.4	0.23	2.5
23.94	23005.7	14577.2	0.13	2.5
23.95	22956.8	14534	-0.17	2.5
23.97	22993.9	14585.7	0.19	2.5
23.98	23014.8	14624.2	0.45	2.5
23.99	23032.7	14591.7	0.23	2.5
24.01	22988.9	14559.8	0.01	2.5
24.02	22980.8	14554.5	-0.03	2.5
24.04	23026.8	14535.9	-0.15	2.5
24.05	22992.7	14612.2	0.37	2.5
24.07	22974.2	14589.8	0.22	2.5
24.08	22826.8	14164.7	-2.7	2.5
24.1	21582.4	12873.9	-11.57	2.5
24.11	21545.2	12841.3	-11.79	2.5
24.13	21551.2	12785.8	-12.18	2.5
24.14	21563.8	12812.9	-11.99	2.5
24.15	21528.7	12793	-12.13	2.5
24.17	21554.4	12820.1	-11.94	2.5
24.18	21556.7	12816.4	-11.97	2.5
24.2	21508	12817.4	-11.96	2.5
24.21	21569.9	12867.8	-11.61	0
24.23	21616.5	12906.9	-11.34	0
24.24	21680.1	12951	-11.04	0
24.26	21738.7	12959.5	-10.98	0
24.27	21810.2	13035.2	-10.46	0
24.29	21850.3	13128.8	-9.82	0
24.3	21902.5	13130.8	-9.81	0
24.31	21896.7	13096.5	-10.04	0
24.33	21871.2	13087.4	-10.1	0
24.34	21903.2	13137.6	-9.76	0
24.36	21953.5	13178.3	-9.48	0
24.37	21950.2	13203.7	-9.3	0
24.39	21956.1	13206.6	-9.28	0
24.4	22070.5	13263.3	-8.9	0
24.42	22056.5	13300.4	-8.64	0
24.43	22124.5	13325.8	-8.47	0
24.44	22098.8	13337.9	-8.38	0
24.46	22197.4	13354.4	-8.27	0
24.47	22172.3	13376.8	-8.12	0
24.49	22175.8	13360.3	-8.23	0
24.5	22226.1	13371.9	-8.15	0
24.52	22255.1	13505.6	-7.23	0
24.53	22252.9	13495.5	-7.3	0
24.55	22307.9	13524	-7.1	0
24.56	22334.2	13544.8	-6.96	0
24.58	22403.7	13647.9	-6.25	0
24.59	22465.1	13667	-6.12	0
24.6	22417.6	13638.6	-6.32	0
24.62	22464	13646.1	-6.27	0
24.63	22470.9	13711.8	-5.81	0
24.65	22519.8	13706.9	-5.85	0
24.66	22578.1	13767.2	-5.43	0
24.68	22565.9	13799.7	-5.21	0
24.69	22609.5	13832.8	-4.98	0
24.71	22563.8	13799	-5.22	0
24.72	22592.3	13827.5	-5.02	0
24.73	22605.3	13822.6	-5.05	0
24.75	22668.6	13857.4	-4.81	0
24.76	22696.7	13848.9	-4.87	0
24.78	22747.7	13900	-4.52	0
24.79	22735.1	13903.5	-4.5	0
24.81	22819.7	14006.2	-3.79	0
24.82	22861.5	14056.9	-3.44	0
24.84	22896	14103.2	-3.13	0
24.85	22938.7	14111.9	-3.07	0
24.87	22958	14157.6	-2.75	0
24.88	22934	14093.8	-3.19	0
24.89	22996	14166.6	-2.69	0
24.91	23014.6	14185.6	-2.56	0
24.92	23002.5	14222	-2.31	0
24.94	23060.3	14312	-1.69	0
24.95	23022.8	14198.5	-2.47	0
24.97	22972	14189.7	-2.53	0
24.98	23009.7	14190.5	-2.53	0
25	23051	14196.3	-2.49	0
25.01	23053.4	14220.9	-2.32	0
25.03	23117.6	14313.5	-1.68	0
25.04	23104	14338.2	-1.51	0
25.05	23040.1	14231.1	-2.25	0
25.07	23051	14249.9	-2.12	0
25.08	23007.7	14183.2	-2.58	0
25.1	23052.2	14221.9	-2.31	0
25.11	23051.4	14223	-2.3	0
25.13	23082.1	14241.4	-2.18	0
25.14	23079	14241.8	-2.17	0
25.16	23128.9	14288.7	-1.85	0
25.17	23128.4	14317.7	-1.65	0
25.18	23168.7	14352.4	-1.41	0
25.2	23118.9	14273.2	-1.96	0
25.21	23135.3	14275	-1.95	0
25.23	23148.2	14314.4	-1.68	0
25.24	23156.7	14289.5	-1.85	0
25.26	23203.6	14293	-1.82	0
25.27	23198.5	14340	-1.5	0
25.29	23229.8	14356.9	-1.38	0
25.3	23227.4	14410.3	-1.02	0
25.32	23284	14443.3	-0.79	0
25.33	23249.1	14406.2	-1.04	0
25.34	23204.7	14388	-1.17	0
25.36	23299.6	14439.7	-0.81	0
25.37	23283.4	14435.8	-0.84	0
25.39	23276.5	14499.3	-0.41	0
25.4	23295.1	14468.9	-0.61	0
25.42	23279.1	14430.8	-0.88	0
25.43	23323.2	14472.8	-0.59	0
25.45	23289.3	14460.3	-0.67	0
25.46	23304.5	14463.1	-0.65	0
25.47	23280.4	14463.3	-0.65	0
25.49	23324.5	14458.4	-0.69	0
25.5	23242	14437.6	-0.83	0
25.52	23290.2	14467.1	-0.63	0
25.53	23261.1	14409	-1.03	0
25.55	23339.6	14409.8	-1.02	0
25.56	23312.2	14471.3	-0.6	0
25.58	23349.6	14488.5	-0.48	0
25.59	23382.3	14562.7	0.03	0
25.61	23340	14555.5	-0.02	0
25.62	23327.6	14554.2	-0.03	0
25.63	23402	14557.5	-0.01	0
25.65	23363.4	14544	-0.1	0
25.66	23397.5	14571	0.09	0
25.68	23342.2	14516.6	-0.29	0
25.69	23403.3	14505.8	-0.36	0
25.71	23374.4	14541.9	-0.11	0
25.72	23386.4	14526.3	-0.22	0
25.74	23363.5	14506.2	-0.36	0
25.75	23371.2	14470.1	-0.61	0
25.76	23370.8	14544.6	-0.09	0
25.78	23381.5	14499	-0.41	0
25.79	23314	14447.9	-0.76	0
25.81	23339.5	14517.1	-0.28	0
25.82	23350.5	14537.9	-0.14	0
25.84	23391.7	14560.9	0.02	0
25.85	23394.2	14578.7	0.14	0
25.87	23370.3	14564.1	0.04	0
25.88	23385.2	14513.3	-0.31	0
25.9	23349.7	14474.6	-0.57	0
25.91	23367	14533.3	-0.17	0
25.92	23364.3	14530.3	-0.19	0
25.94	23422.7	14579.4	0.14	0
25.95	23414.4	14552.4	-0.04	0
25.97	23427.6	14542.7	-0.11	0
25.98	23441	14634	0.52	0
26	23503.2	14597.5	0.27	0
26.01	23525.9	14655.9	0.67	0
26.03	23490.6	14605.7	0.33	0
26.04	23554.1	14701.4	0.98	0
26.06	23559.2	14722.5	1.13	0
26.07	23556.4	14646	0.6	0
26.08	23480.7	14664.3	0.73	0
26.1	23520	14712	1.06	0
26.11	23425	14576.7	0.13	0
26.13	23416.6	14597.6	0.27	0
26.14	23435.9	14615.8	0.39	0
26.16	23465	14590.3	0.22	0
26.17	23420.5	14525.9	-0.22	0
26.19	23425.3	14573.8	0.11	0
26.2	23421.3	14560	0.01	0
26.21	23424.7	14552.1	-0.04	0
26.23	23392.8	14572	0.09	0
26.24	23409.3	14524.7	-0.23	0
26.26	23417.2	14586	0.19	0
26.27	23426.6	14573.2	0.1	0
26.29	23416	14542.4	-0.11	0
26.3	23467	14617.5	0.41	0
26.32	23453.5	14569.8	0.08	0
26.33	23577.1	14704.9	1.01	0
26.35	23477.8	14624.6	0.46	0
26.36	23531.9	14697.1	0.95	0
26.37	23550.4	14715.6	1.08	0
26.39	23521.9	14627.1	0.47	0
26.4	23523.7	14696.5	0.95	0
26.42	23540.3	14691.9	0.92	0
26.43	23586.2	14694.9	0.94	0
26.45	23528	14632.6	0.51	0
26.46	23482.5	14608.5	0.34	0
26.48	23491.2	14624.1	0.45	0
26.49	23511.4	14672.1	0.78	0
26.5	23505.4	14668.4	0.76	0
26.52	23485	14602.3	0.3	0
26.53	23523	14648.2	0.62	0
26.55	23492.6	14625.7	0.46	0
26.56	23562.8	14631.6	0.5	0
26.58	23555	14631.6	0.5	0
26.59	23507.1	14641.1	0.57	0
26.61	23512.5	14667.6	0.75	0
26.62	23549.4	14675	0.8	0
26.64	23507.6	14646.1	0.6	0
26.65	23534.6	14673.3	0.79	0
26.66	23540.1	14694.9	0.94	0
26.68	23545.8	14700.3	0.98	0
26.69	23506.5	14652.3	0.65	0
26.71	23496.3	14570.8	0.09	0
26.72	23522.4	14594.6	0.25	0
26.74	23509.4	14649.6	0.63	0
26.75	23539.8	14611	0.36	0
26.77	23535.1	14724.8	1.14	0
26.78	23543.8	14748.9	1.31	0
26.79	23519.4	14627.5	0.47	0
26.81	23251	14726.4	1.15	0
26.82	23328.4	14820.4	1.8	0
26.84	23482.6	14985.6	2.94	0
26.85	23591.9	15094.7	3.68	0
26.87	23780.3	15277.3	4.94	0
26.88	23929.4	15403.3	5.8	0
26.9	23961.3	15426.4	5.96	0
26.91	24024.3	15496.6	6.45	0
26.93	24015.4	15544.7	6.78	0
26.94	24030	15511.2	6.55	0
26.95	24028	15545.4	6.78	0
26.97	24055.1	15539.7	6.74	0
26.98	24068.6	15567	6.93	0
27	24050.1	15514.7	6.57	0
27.01	23982.8	15474	6.29	0
27.03	24017	15526.9	6.65	2.5
27.04	24010.8	15528.2	6.66	2.5
27.06	23985.1	15490.1	6.4	2.5
27.07	24063.6	15550.2	6.81	2.5
27.09	24043.4	15503.9	6.49	2.5
27.1	24002.3	15524.8	6.64	2.5
27.11	23979.4	15496.2	6.44	2.5
27.13	23962.3	15466.9	6.24	2.5
27.14	23983.8	15517.6	6.59	2.5
27.16	24010.4	15541.2	6.75	2.5
27.17	24010.6	15522.1	6.62	2.5
27.19	24029.6	15547.5	6.79	2.5
27.2	24013.8	15539.5	6.74	2.5
27.22	24043.2	15623	7.31	2.5
27.23	24038.5	15539.5	6.74	2.5
27.24	24017.3	15518.9	6.6	2.5
27.26	23994.1	15556.4	6.86	2.5
27.27	23963	15477.1	6.31	2.5
27.29	23967	15493.2	6.42	2.5
27.3	23935.2	15463.9	6.22	2.5
27.32	23959.5	15451.5	6.13	2.5
27.33	23927.2	15438.6	6.05	2.5
27.35	23917.3	15421.8	5.93	2.5
27.36	23912	15480.3	6.33	2.5
27.38	23925.1	15460.6	6.2	2.5
27.39	23941	15446.1	6.1	2.5
27.4	23951.2	15508.5	6.53	2.5
27.42	23915.8	15483.4	6.35	2.5
27.43	24020.5	15560.2	6.88	2.5
27.45	23912.1	15503.2	6.49	2.5
27.46	23952.7	15468.2	6.25	2.5
27.48	23971.6	15512.7	6.56	2.5
27.49	23942.9	15495.1	6.44	2.5
27.51	23987.8	15566	6.92	2.5
27.52	23974.1	15468.4	6.25	2.5
27.53	23928.6	15512	6.55	2.5
27.55	23952	15545.2	6.78	2.5
27.56	23906.6	15494.5	6.43	2.5
27.58	23860.5	15465.2	6.23	2.5
27.59	23854	15436.6	6.03	2.5
27.61	23837.1	15415.5	5.89	2.5
27.62	23884	15406.4	5.83	2.5
27.64	23862.1	15426.4	5.96	2.5
27.65	23919.5	15483.9	6.36	2.5
27.67	23832.1	15401.3	5.79	2.5
27.68	23822	15442.6	6.07	2.5
27.69	23790.5	15362.3	5.52	2.5
27.71	23760.3	15387	5.69	2.5
27.72	23754.9	15333.9	5.33	2.5
27.74	23798.2	15381.1	5.65	2.5
27.75	23762.5	15373.7	5.6	2.5
27.77	23820.2	15366.6	5.55	2.5
27.78	23830.4	15441	6.06	2.5
27.8	23781.3	15392.8	5.73	2.5
27.81	23785	15386.7	5.69	2.5
27.82	23801.2	15412.3	5.87	2.5
27.84	23818.8	15347.9	5.42	2.5
27.85	23744.9	15336	5.34	2.5
27.87	23764.1	15336.7	5.35	2.5
27.88	23736.7	15344.9	5.4	2.5
27.9	23744	15342.3	5.39	2.5
27.91	23689	15264.4	4.85	2.5
27.93	23718.3	15303.5	5.12	2.5
27.94	23691.8	15253.9	4.78	2.5
27.96	23712.6	15330.7	5.31	2.5
27.97	23696.7	15328.2	5.29	2.5
27.98	23738.9	15333.5	5.32	2.5
28	23703.4	15307.4	5.15	2.5
28.01	23648	15238.5	4.67	2.5
28.03	23703.1	15230.4	4.62	2.5
28.04	23689.5	15283	4.98	2.5
28.06	23660.3	15241.3	4.69	2.5
28.07	23643.3	15274.1	4.92	2.5
28.09	23641.5	15243.9	4.71	2.5
28.1	23656.4	15312.8	5.18	2.5
28.12	23695.8	15276	4.93	2.5
28.13	23647.9	15237.6	4.67	2.5
28.14	23621	15244.9	4.72	2.5
28.16	23549.3	15210.3	4.48	2.5
28.17	23547.8	15138.4	3.98	2.5
28.19	23537	15129	3.92	2.5
28.2	23635.8	15278.4	4.95	2.5
28.22	23571	15168.8	4.19	2.5
28.23	23581.5	15132.4	3.94	2.5
28.25	23605	15206.8	4.45	2.5
28.26	23579	15154.2	4.09	2.5
28.27	23541	15152.9	4.08	2.5
28.29	23580.9	15201.4	4.42	2.5
28.3	23512.5	15136.5	3.97	2.5
28.32	23551.9	15204.2	4.44	2.5
28.33	23445.3	15064.4	3.48	2.5
28.35	23508	15135.5	3.96	2.5
28.36	23474.6	15175	4.24	2.5
28.38	23470.7	15127.1	3.91	2.5
28.39	23442	15016	3.14	2.5
28.41	23488.4	15082.2	3.6	2.5
28.42	23459.1	15126.3	3.9	2.5
28.43	23465	15078.7	3.57	2.5
28.45	23349.1	14960.2	2.76	2.5
28.46	23435.7	15058.6	3.44	2.5
28.48	23376	15002.6	3.05	2.5
28.49	23375.9	15030.3	3.24	2.5
28.51	23405.5	15057.6	3.43	2.5
28.52	23415.4	14999.3	3.03	2.5
28.54	23347.5	15006.3	3.08	2.5
28.55	23310.6	14994.9	3	2.5
28.56	23375.5	15040.6	3.31	2.5
28.58	23354.5	15021.6	3.18	2.5
28.59	23344.1	14978.4	2.89	2.5
28.61	23307.1	14934	2.58	2.5
28.62	23335.8	14980.9	2.9	2.5
28.64	23317.2	14979.7	2.89	2.5
28.65	23314.2	14950.8	2.7	2.5
28.67	23337.4	15026.6	3.22	2.5
28.68	23316.3	14935.4	2.59	2.5
28.7	23217.8	14904.6	2.38	2.5
28.71	23229	14919.5	2.48	2.5
28.72	23251.4	14882.7	2.23	2.5
28.74	23184.1	14849.9	2	2.5
28.75	23189.7	14856	2.05	2.5
28.77	23204	14873.5	2.17	2.5
28.78	23155.2	14795.9	1.63	2.5
28.8	23186.1	14811.9	1.74	2.5
28.81	23191.8	14826.5	1.84	2.5
28.83	23182	14828.7	1.86	2.5
28.84	23166	14854.9	2.04	2.5
28.85	23210.5	14836.1	1.91	2.5
28.87	23186.5	14827.7	1.85	2.5
28.88	23148.3	14819.4	1.79	2.5
28.9	23101.7	14762.4	1.4	2.5
28.91	23118.1	14777.5	1.51	2.5
28.93	23131.7	14787.9	1.58	2.5
28.94	23160.2	14804.4	1.69	2.5
28.96	23127.8	14818.1	1.78	2.5
28.97	23146.7	14861.1	2.08	2.5
28.99	23101.2	14773.3	1.48	2.5
[truncated: 6 more rows]

## Sheet: ED Figure 10B
Time	dF/F0_bleach_correct	Wavelength	dF/F0_bleach_correct	Wavelength	dF/F0_bleach_correct	Wavelength	dF/F0_bleach_correct	Wavelength	dF/F0_bleach_correct	Wavelength	dF/F0_bleach_correct	Wavelength	dF/F0_bleach_correct	Wavelength	dF/F0_bleach_correct	Wavelength	dF/F0_bleach_correct	Wavelength	dF/F0_bleach_correct	Wavelength	dF/F0_bleach_correct	Wavelength	dF/F0_bleach_correct	Wavelength	dF/F0_bleach_correct	Wavelength	dF/F0_bleach_correct	Wavelength	dF/F0_bleach_correct	Wavelength	dF/F0_bleach_correct	Wavelength	Mean DF/F0	SEM	Mean wavelength	SEM
0.0112	0	530	0	530	0	525	0	525	0	530	0	525	0	530	0	528	0	525	0	525	0	525	0	525	0	525	0	525	0	525	0	525	0	0	526.438	0.5625
0.0223	0	530	0	530	0	525	0	525	0	530	0	525	0	530	0	528	0	525	0	525	0	525	0	525	0	525	0	525	0	525	0	525	0	0	526.438	0.5625
0.0335	0	530	0	530	0	525	0	525	0	530	0	525	0	530	0	528	0	525	0	525	0	525	0	525	0	525	0	525	0	525	0	525	0	0	526.438	0.5625
0.0446	0	530	0	530	0	525	0	525	0	530	0	525	0	530	0	528	0	525	0	525	0	525	0	525	0	525	0	525	0	525	0	525	0	0	526.438	0.5625
0.0558	0	530	0	530	0	525	0	525	0	530	0	525	0	530	0	528	0	525	0	525	0	525	0	525	0	525	0	525	0	525	0	525	0	0	526.438	0.5625
0.067	0	530	0	530	0	525	0	525	0	530	0	525	0	530	0	528	0	525	0	525	0	525	0	525	0	525	0	525	0	525	0	525	0	0	526.438	0.5625
0.0781	0	530	0	530	0	525	0	525	0	530	0	525	0	530	0	528	0	525	0	525	0	525	0	525	0	525	0	525	0	525	0	525	0	0	526.438	0.5625
0.0893	0	530	0	530	0	525	0	525	0	530	0	525	0	530	0	528	0	525	0	525	0	525	0	525	0	525	0	525	0	525	0	525	0	0	526.438	0.5625
0.1004	0	530	0	530	0	525	0	525	0	530	0	525	0	530	0	528	0	525	0	525	0	525	0	525	0	525	0	525	0	525	0	525	0	0	526.438	0.5625
0.1116	0	530	0	530	0	525	0	525	0	530	0	525	0	530	0	528	0	525	0	525	0	525	0	525	0	525	0	525	0	525	0	525	0	0	526.438	0.5625
0.1228	0	530	0	530	0	525	0	525	0	530	0	525	0	530	0	528	0	525	0	525	0	525	0	525	0	525	0	525	0	525	0	525	0	0	526.438	0.5625
0.1339	0	530	0	530	0	525	0	525	0	530	0	525	0	530	0	528	0	525	0	525	0	525	0	525	0	525	0	525	0	525	0	525	0	0	526.438	0.5625
0.1451	0	530	0	530	0	525	0	525	0	530	0	525	0	530	0	528	0	525	0	525	0	525	0	525	0	525	0	525	0	525	0	525	0	0	526.438	0.5625
0.1562	0	530	0	530	0	525	0	525	0	530	0	525	0	530	0	528	0	525	0	525	0	525	0	525	0	525	0	525	0	525	0	525	0	0	526.438	0.5625
0.1674	0	530	0	530	0	525	0	525	0	530	0	525	0	530	0	528	0	525	0	525	0	525	0	525	0	525	0	525	0	525	0	525	0	0	526.438	0.5625
0.1786	0	530	0	530	0	525	0	525	0	530	0	525	0	530	0	528	0	525	0	525	0	525	0	525	0	525	0	525	0	525	0	525	0	0	526.438	0.5625
0.1897	0	530	0	530	0	525	0	525	0	530	0	525	0	530	0	528	0	525	0	525	0	525	0	525	0	525	0	525	0	525	0	525	0	0	526.438	0.5625
0.2009	0	530	0	530	0	525	0	525	0	530	0	525	0	530	0	528	0	525	0	525	0	525	0	525	0	525	0	525	0	525	0	525	0	0	526.438	0.5625
0.212	0	530	0	530	0	525	0	525	0	530	0	525	0	530	0	528	0	525	0	525	0	525	0	525	0	525	0	525	0	525	0	525	0	0	526.438	0.5625
0.2232	0	530	0	530	0	525	0	525	0	530	0	525	0	530	0	528	0	525	0	525	0	525	0	525	0	525	0	525	0	525	0	525	0	0	526.438	0.5625
0.2344	0	530	0	530	0	525	0	525	0	530	0	525	0	530	0	528	0	525	0	525	0	525	0	525	0	525	0	525	0	525	0	525	0	0	526.438	0.5625
0.2455	0	530	0	530	0	525	0	525	0	530	0	525	0	530	0	528	0	525	0	525	0	525	0	525	0	525	0	525	0	525	0	525	0	0	526.438	0.5625
0.2567	0	530	0	530	0	525	0	525	0	530	0	525	0	530	0	528	0	525	0	525	0	525	0	525	0	525	0	525	0	525	0	525	0	0	526.438	0.5625
0.2678	0	530	0	530	0	525	0	525	0	530	0	525	0	530	0	528	0	525	0	525	0	525	0	525	0	525	0	525	0	525	0	525	0	0	526.438	0.5625
0.279	0	530	0	530	0	525	0	525	0	530	0	525	0	530	0	528	0	525	0	525	0	525	0	525	0	525	0	525	0	525	0	525	0	0	526.438	0.5625
0.2902	0	530	0	530	0	525	0	525	0	530	0	525	0	530	0	528	0	525	0	525	0	525	0	525	0	525	0	525	0	525	0	525	0	0	526.438	0.5625
0.3013	0	530	0	530	0	525	0	525	0	530	0	525	0	530	0	528	0	525	0	525	0	525	0	525	0	525	0	525	0	525	0	525	0	0	526.438	0.5625
0.3125	0	530	0	530	0	525	0	525	0	530	0	525	0	530	0	528	0	525	0	525	0	525	0	525	0	525	0	525	0	525	0	525	0	0	526.438	0.5625
0.3236	0	530	0	530	0	525	0	525	0	530	0	525	0	530	0	528	0	525	0	525	0	525	0	525	0	525	0	525	0	525	0	525	0	0	526.438	0.5625
0.3348	0	530	0	530	0	525	0	525	0	530	0	525	0	530	0	528	0	525	0	525	0	525	0	525	0	525	0	525	0	525	0	525	0	0	526.438	0.5625
0.346	0	530	0	530	0	525	0	525	0	530	0	525	0	530	0	528	0	525	0	525	0	525	0	525	0	525	0	525	0	525	0	525	0	0	526.438	0.5625
0.3571	0	530	0	530	0	525	0	525	0	530	0	525	0	530	0	528	0	525	0	525	0	525	0	525	0	525	0	525	0	525	0	525	0	0	526.438	0.5625
0.3683	0	530	0	530	0	525	0	525	0	530	0	525	0	530	0	528	0	525	0	525	0	525	0	525	0	525	0	525	0	525	0	525	0	0	526.438	0.5625
0.3794	0	530	0	530	0	525	0	525	0	530	0	525	0	530	0	528	0	525	0	525	0	525	0	525	0	525	0	525	0	525	0	525	0	0	526.438	0.5625
0.3906	0	530	0	530	0	525	0	525	0	530	0	525	0	530	0	528	0	525	0	525	0	525	0	525	0	525	0	525	0	525	0	525	0	0	526.438	0.5625
0.4018	0	530	0	530	0	525	0	525	0	530	0	525	0	530	0	528	0	525	0	525	0	525	0	525	0	525	0	525	0	525	0	525	0	0	526.438	0.5625
0.4129	0	530	0	530	0	525	0	525	0	530	0	525	0	530	0	528	0	525	0	525	0	525	0	525	0	525	0	525	0	525	0	525	0	0	526.438	0.5625
0.4241	0	530	0	530	0	525	0	525	0	530	0	525	0	530	0	528	0	525	0	525	0	525	0	525	0	525	0	525	0	525	0	525	0	0	526.438	0.5625
0.4352	0	530	0	530	0	525	0	525	0	530	0	525	0	530	0	528	0	525	0	525	0	525	0	525	0	525	0	525	0	525	0	525	0	0	526.438	0.5625
0.4464	0	530	0	530	0	525	0	525	0	530	0	525	0	530	0	528	0	525	0	525	0	525	0	525	0	525	0	525	0	525	0	525	0	0	526.438	0.5625
0.4576	0	530	0	530	0	525	0	525	0	530	0	525	0	530	0	528	0	525	0	525	0	525	0	525	0	525	0	525	0	525	0	525	0	0	526.438	0.5625
0.4687	0	530	0	530	0	525	0	525	0	530	0	525	0	530	0	528	0	525	0	525	0	525	0	525	0	525	0	525	0	525	0	525	0	0	526.438	0.5625
0.4799	0	530	0	530	0	525	0	525	0	530	0	525	0	530	0	528	0	525	0	525	0	525	0	525	0	525	0	525	0	525	0	525	0	0	526.438	0.5625
0.491	0	530	0	530	0	525	0	525	0	530	0	525	0	530	0	528	0	525	0	525	0	525	0	525	0	525	0	525	0	525	0	525	0	0	526.438	0.5625
0.5022	0	530	0	530	0	525	0	525	0	530	0	525	0	530	0	528	0	525	0	525	0	525	0	525	0	525	0	525	0	525	0	525	0	0	526.438	0.5625
0.5134	0	530	0	530	0	525	0	525	0	530	0	525	0	530	0	528	0	525	0	525	0	525	0	525	0	525	0	525	0	525	0	525	0	0	526.438	0.5625
0.5245	0	530	0	530	0	525	0	525	0	530	0	525	0	530	0	528	0	525	0	525	0	525	0	525	0	525	0	525	0	525	0	525	0	0	526.438	0.5625
0.5357	0	530	0	530	0	525	0	525	0	530	0	525	0	530	0	528	0	525	0	525	0	525	0	525	0	525	0	525	0	525	0	525	0	0	526.438	0.5625
0.5468	0	530	0	530	0	525	0	525	0	530	0	525	0	530	0	528	0	525	0	525	0	525	0	525	0	525	0	525	0	525	0	525	0	0	526.438	0.5625
0.558	0	530	0	530	0	525	0	525	0	530	0	525	0	530	0	528	0	525	0	525	0	525	0	525	0	525	0	525	0	525	0	525	0	0	526.438	0.5625
0.5692	0	530	0	530	0	525	0	525	0	530	0	525	0	530	0	528	0	525	0	525	0	525	0	525	0	525	0	525	0	525	0	525	0	0	526.438	0.5625
0.5803	0	530	0	530	0	525	0	525	0	530	0	525	0	530	0	528	0	525	0	525	0	525	0	525	0	525	0	525	0	525	0	525	0	0	526.438	0.5625
0.5915	0	530	0	530	0	525	0	525	0	530	0	525	0	530	0	528	0	525	0	525	0	525	0	525	0	525	0	525	0	525	0	525	0	0	526.438	0.5625
0.6026	0	530	0	530	0	525	0	525	0	530	0	525	0	530	0	528	0	525	0	525	0	525	0	525	0	525	0	525	0	525	0	525	0	0	526.438	0.5625
0.6138	0	530	0	530	0	525	0	525	0	530	0	525	0	530	0	528	0	525	0	525	0	525	0	525	0	525	0	525	0	525	0	525	0	0	526.438	0.5625
0.6249	0	530	0	530	0	525	0	525	0	530	0	525	0	530	0	528	0	525	0	525	0	525	0	525	0	525	0	525	0	525	0	525	0	0	526.438	0.5625
0.6361	0	530	0	530	0	525	0	525	0	530	0	525	0	530	0	528	0	525	0	525	0	525	0	525	0	525	0	525	0	525	0	525	0	0	526.438	0.5625
0.6473	0	530	0	530	0	525	0	525	0	530	0	525	0	530	0	528	0	525	0	525	0	525	0	525	0	525	0	525	0	525	0	525	0	0	526.438	0.5625
0.6584	0	530	0	530	0	525	0	525	0	530	0	525	0	530	0	528	0	525	0	525	0	525	0	525	0	525	0	525	0	525	0	525	0	0	526.438	0.5625
0.6696	0	530	0	530	0	525	0	525	0	530	0	525	0	530	0	528	0	525	0	525	0	525	0	525	0	525	0	525	0	525	0	525	0	0	526.438	0.5625
0.6807	0	530	0	530	0	525	0	525	0	530	0	525	0	530	0	528	0	525	0	525	0	525	0	525	0	525	0	525	0	525	0	525	0	0	526.438	0.5625
0.6919	0	530	0	530	0	525	0	525	0	530	0	525	0	530	0	528	0	525	0	525	0	525	0	525	0	525	0	525	0	525	0	525	0	0	526.438	0.5625
0.7031	0	530	0	530	0	525	0	525	0	530	0	525	0	530	0	528	0	525	0	525	0	525	0	525	0	525	0	525	0	525	0	525	0	0	526.438	0.5625
0.7142	0	530	0	530	0	525	0	525	0	530	0	525	0	530	0	528	0	525	0	525	0	525	0	525	0	525	0	525	0	525	0	525	0	0	526.438	0.5625
0.7254	0	530	0	530	0	525	0	525	0	530	0	525	0	530	0	528	0	525	0	525	0	525	0	525	0	525	0	525	0	525	0	525	0	0	526.438	0.5625
0.7365	0	530	0	530	0	525	0	525	0	530	0	525	0	530	0	528	0	525	0	525	0	525	0	525	0	525	0	525	0	525	0	525	0	0	526.438	0.5625
0.7477	0	530	0	530	0	525	0	525	0	530	0	525	0	530	0	528	0	525	0	525	0	525	0	525	0	525	0	525	0	525	0	525	0	0	526.438	0.5625
0.7589	0	530	0	530	0	525	0	525	0	530	0	525	0	530	0	528	0	525	0	525	0	525	0	525	0	525	0	525	0	525	0	525	0	0	526.438	0.5625
0.77	0	530	0	530	0	525	0	525	0	530	0	525	0	530	0	528	0	525	0	525	0	525	0	525	0	525	0	525	0	525	0	525	0	0	526.438	0.5625
0.7812	0	530	0	530	0	525	0	525	0	530	0	525	0	530	0	528	0	525	0	525	0	525	0	525	0	525	0	525	0	525	0	525	0	0	526.438	0.5625
0.7923	0	530	0	530	0	525	0	525	0	530	0	525	0	530	0	528	0	525	0	525	0	525	0	525	0	525	0	525	0	525	0	525	0	0	526.438	0.5625
0.8035	0	530	0	530	0	525	0	525	0	530	0	525	0	530	0	528	0	525	0	525	0	525	0	525	0	525	0	525	0	525	0	525	0	0	526.438	0.5625
0.8147	0	530	0	530	0	525	0	525	0	530	0	525	0	530	0	528	0	525	0	525	0	525	0	525	0	525	0	525	0	525	0	525	0	0	526.438	0.5625
0.8258	0	530	0	530	0	525	0	525	0	530	0	525	0	530	0	528	0	525	0	525	0	525	0	525	0	525	0	525	0	525	0	525	0	0	526.438	0.5625
0.837	0	530	0	530	0	525	0	525	0	530	0	525	0	530	0	528	0	525	0	525	0	525	0	525	0	525	0	525	0	525	0	525	0	0	526.438	0.5625
0.8481	0	530	0	530	0	525	0	525	0	530	0	525	0	530	0	528	0	525	0	525	0	525	0	525	0	525	0	525	0	525	0	525	0	0	526.438	0.5625
0.8593	0	530	0	530	0	525	0	525	0	530	0	525	0	530	0	528	0	525	0	525	0	525	0	525	0	525	0	525	0	525	0	525	0	0	526.438	0.5625
0.8705	0	530	0	530	0	525	0	525	0	530	0	525	0	530	0	528	0	525	0	525	0	525	0	525	0	525	0	525	0	525	0	525	0	0	526.438	0.5625
0.8816	0	530	0	530	0	525	0	525	0	530	0	525	0	530	0	528	0	525	0	525	0	525	0	525	0	525	0	525	0	525	0	525	0	0	526.438	0.5625
0.8928	0	530	0	530	0	525	0	525	0	530	0	525	0	530	0	528	0	525	0	525	0	525	0	525	0	525	0	525	0	525	0	525	0	0	526.438	0.5625
0.9039	0	530	0	530	0	525	0	525	0	530	0	525	0	530	0	528	0	525	0	525	0	525	0	525	0	525	0	525	0	525	0	525	0	0	526.438	0.5625
0.9151	0	530	0	530	0	525	0	525	0	530	0	525	0	530	0	528	0	525	0	525	0	525	0	525	0	525	0	525	0	525	0	525	0	0	526.438	0.5625
0.9263	0	530	0	530	0	525	0	525	0	530	0	525	0	530	0	528	0	525	0	525	0	525	0	525	0	525	0	525	0	525	0	525	0	0	526.438	0.5625
0.9374	0	530	0	530	0	525	0	525	0	530	0	525	0	530	0	528	0	525	0	525	0	525	0	525	0	525	0	525	0	525	0	525	0	0	526.438	0.5625
0.9486	0	530	0	530	0	525	0	525	0	530	0	525	0	530	0	528	0	525	0	525	0	525	0	525	0	525	0	525	0	525	0	525	0	0	526.438	0.5625
0.9597	0	530	0	530	0	525	0	525	0	530	0	525	0	530	0	528	0	525	0	525	0	525	0	525	0	525	0	525	0	525	0	525	0	0	526.438	0.5625
0.9709	0	530	0	530	0	525	0	525	0	530	0	525	0	530	0	528	0	525	0	525	0	525	0	525	0	525	0	525	0	525	0	525	0	0	526.438	0.5625
0.9821	0	530	0	530	0	525	0	525	0	530	0	525	0	530	0	528	0	525	0	525	0	525	0	525	0	525	0	525	0	525	0	525	0	0	526.438	0.5625
0.9932	0	530	0	530	0	525	0	525	0	530	0	525	0	530	0	528	0	525	0	525	0	525	0	525	0	525	0	525	0	525	0	525	0	0	526.438	0.5625
1.0044	0	530	0	530	0	525	0	525	0	530	0	525	0	530	0	528	0	525	0	525	0	525	0	525	0	525	0	525	0	525	0	525	0	0	526.438	0.5625
1.0155	0	530	0	530	0	525	0	525	0	530	0	525	0	530	0	528	0	525	0	525	0	525	0	525	0	525	0	525	0	525	0	525	0	0	526.438	0.5625
1.0267	0	530	0	530	0	525	0	525	0	530	0	525	0	530	0	528	0	525	0	525	0	525	0	525	0	525	0	525	0	525	0	525	0	0	526.438	0.5625
1.0379	0	530	0	530	0	525	0	525	0	530	0	525	0	530	0	528	0	525	0	525	0	525	0	525	0	525	0	525	0	525	0	525	0	0	526.438	0.5625
1.049	0	530	0	530	0	525	0	525	0	530	0	525	0	530	0	528	0	525	0	525	0	525	0	525	0	525	0	525	0	525	0	525	0	0	526.438	0.5625
1.0602	0	530	0	530	0	525	0	525	0	530	0	525	0	530	0	528	0	525	0	525	0	525	0	525	0	525	0	525	0	525	0	525	0	0	526.438	0.5625
1.0713	0	530	0	530	0	525	0	525	0	530	0	525	0	530	0	528	0	525	0	525	0	525	0	525	0	525	0	525	0	525	0	525	0	0	526.438	0.5625
1.0825	0	530	0	530	0	525	0	525	0	530	0	525	0	530	0	528	0	525	0	525	0	525	0	525	0	525	0	525	0	525	0	525	0	0	526.438	0.5625
1.0937	0	530	0	530	0	525	0	525	0	530	0	525	0	530	0	528	0	525	0	525	0	525	0	525	0	525	0	525	0	525	0	525	0	0	526.438	0.5625
1.1048	0	530	0	530	0	525	0	525	0	530	0	525	0	530	0	528	0	525	0	525	0	525	0	525	0	525	0	525	0	525	0	525	0	0	526.438	0.5625
1.116	0	530	0	530	0	525	0	525	0	530	0	525	0	530	0	528	0	525	0	525	0	525	0	525	0	525	0	525	0	525	0	525	0	0	526.438	0.5625
1.1271	0	530	0	530	0	525	0	525	0	530	0	525	0	530	0	528	0	525	0	525	0	525	0	525	0	525	0	525	0	525	0	525	0	0	526.438	0.5625
1.1383	0	530	0	530	0	525	0	525	0	530	0	525	0	530	0	528	0	525	0	525	0	525	0	525	0	525	0	525	0	525	0	525	0	0	526.438	0.5625
1.1495	0	530	0	530	0	525	0	525	0	530	0	525	0	530	0	528	0	525	0	525	0	525	0	525	0	525	0	525	0	525	0	525	0	0	526.438	0.5625
1.1606	0	530	0	530	0	525	0	525	0	530	0	525	0	530	0	528	0	525	0	525	0	525	0	525	0	525	0	525	0	525	0	525	0	0	526.438	0.5625
1.1718	0	530	0	530	0	525	0	525	0	530	0	525	0	530	0	528	0	525	0	525	0	525	0	525	0	525	0	525	0	525	0	525	0	0	526.438	0.5625
1.1829	0	530	0	530	0	525	0	525	0	530	0	525	0	530	0	528	0	525	0	525	0	525	0	525	0	525	0	525	0	525	0	525	0	0	526.438	0.5625
1.1941	0	530	0	530	0	525	0	525	0	530	0	525	0	530	0	528	0	525	0	525	0	525	0	525	0	525	0	525	0	525	0	525	0	0	526.438	0.5625
1.2053	0	530	0	530	0	525	0	525	0	530	0	525	0	530	0	528	0	525	0	525	0	525	0	525	0	525	0	525	0	525	0	525	0	0	526.438	0.5625
1.2164	0	530	0	530	0	525	0	525	0	530	0	525	0	530	0	528	0	525	0	525	0	525	0	525	0	525	0	525	0	525	0	525	0	0	526.438	0.5625
1.2276	0	530	0	530	0	525	0	525	0	530	0	525	0	530	0	528	0	525	0	525	0	525	0	525	0	525	0	525	0	525	0	525	0	0	526.438	0.5625
1.2387	0	530	0	530	0	525	0	525	0	530	0	525	0	530	0	528	0	525	0	525	0	525	0	525	0	525	0	525	0	525	0	525	0	0	526.438	0.5625
1.2499	0	530	0	530	0	525	0	525	0	530	0	525	0	530	0	528	0	525	0	525	0	525	0	525	0	525	0	525	0	525	0	525	0	0	526.438	0.5625
1.2611	0	530	0	530	0	525	0	525	0	530	0	525	0	530	0	528	0	525	0	525	0	525	0	525	0	525	0	525	0	525	0	525	0	0	526.438	0.5625
1.2722	0	530	0	530	0	525	0	525	0	530	0	525	0	530	0	528	0	525	0	525	0	525	0	525	0	525	0	525	0	525	0	525	0	0	526.438	0.5625
1.2834	0	530	0	530	0	525	0	525	0	530	0	525	0	530	0	528	0	525	0	525	0	525	0	525	0	525	0	525	0	525	0	525	0	0	526.438	0.5625
1.2945	0	530	0	530	0	525	0	525	0	530	0	525	0	530	0	528	0	525	0	525	0	525	0	525	0	525	0	525	0	525	0	525	0	0	526.438	0.5625
1.3057	0	530	0	530	0	525	0	525	0	530	0	525	0	530	0	528	0	525	0	525	0	525	0	525	0	525	0	525	0	525	0	525	0	0	526.438	0.5625
1.3169	0	530	0	530	0	525	0	525	0	530	0	525	0	530	0	528	0	525	0	525	0	525	0	525	0	525	0	525	0	525	0	525	0	0	526.438	0.5625
1.328	0	530	0	530	0	525	0	525	0	530	0	525	0	530	0	528	0	525	0	525	0	525	0	525	0	525	0	525	0	525	0	525	0	0	526.438	0.5625
1.3392	0	530	0	530	0	525	0	525	0	530	0	525	0	530	0	528	0	525	0	525	0	525	0	525	0	525	0	525	0	525	0	525	0	0	526.438	0.5625
1.3503	0	530	0	530	0	525	0	525	0	530	0	525	0	530	0	528	0	525	0	525	0	525	0	525	0	525	0	525	0	525	0	525	0	0	526.438	0.5625
1.3615	0	530	0	530	0	525	0	525	0	530	0	525	0	530	0	528	0	525	0	525	0	525	0	525	0	525	0	525	0	525	0	525	0	0	526.438	0.5625
1.3727	0	530	0	530	0	525	0	525	0	530	0	525	0	530	0	528	0	525	0	525	0	525	0	525	0	525	0	525	0	525	0	525	0	0	526.438	0.5625
1.3838	0	530	0	530	0	525	0	525	0	530	0	525	0	530	0	528	0	525	0	525	0	525	0	525	0	525	0	525	0	525	0	525	0	0	526.438	0.5625
1.395	0	530	0	530	0	525	0	525	0	530	0	525	0	530	0	528	0	525	0	525	0	525	0	525	0	525	0	525	0	525	0	525	0	0	526.438	0.5625
1.4061	0	530	0	530	0	525	0	525	0	530	0	525	0	530	0	528	0	525	0	525	0	525	0	525	0	525	0	525	0	525	0	525	0	0	526.438	0.5625
1.4173	0	530	0	530	0	525	0	525	0	530	0	525	0	530	0	528	0	525	0	525	0	525	0	525	0	525	0	525	0	525	0	525	0	0	526.438	0.5625
1.4285	0	530	0	530	0	525	0	525	0	530	0	525	0	530	0	528	0	525	0	525	0	525	0	525	0	525	0	525	0	525	0	525	0	0	526.438	0.5625
1.4396	0	530	0	530	0	525	0	525	0	530	0	525	0	530	0	528	0	525	0	525	0	525	0	525	0	525	0	525	0	525	0	525	0	0	526.438	0.5625
1.4508	0	530	0	530	0	525	0	525	0	530	0	525	0	530	0	528	0	525	0	525	0	525	0	525	0	525	0	525	0	525	0	525	0	0	526.438	0.5625
1.4619	0	530	0	530	0	525	0	525	0	530	0	525	0	530	0	528	0	525	0	525	0	525	0	525	0	525	0	525	0	525	0	525	0	0	526.438	0.5625
1.4731	0	530	0	530	0	525	0	525	0	530	0	525	0	530	0	528	0	525	0	525	0	525	0	525	0	525	0	525	0	525	0	525	0	0	526.438	0.5625
1.4843	0	530	0	530	0	525	0	525	0	530	0	525	0	530	0	528	0	525	0	525	0	525	0	525	0	525	0	525	0	525	0	525	0	0	526.438	0.5625
1.4954	0	530	0	530	0	525	0	525	0	530	0	525	0	530	0	528	0	525	0	525	0	525	0	525	0	525	0	525	0	525	0	525	0	0	526.438	0.5625
1.5066	0	530	0	530	0	525	0	525	0	530	0	525	0	530	0	528	0	525	0	525	0	525	0	525	0	525	0	525	0	525	0	525	0	0	526.438	0.5625
1.5177	0	530	0	530	0	525	0	525	0	530	0	525	0	530	0	528	0	525	0	525	0	525	0	525	0	525	0	525	0	525	0	525	0	0	526.438	0.5625
1.5289	0	530	0	530	0	525	0	525	0	530	0	525	0	530	0	528	0	525	0	525	0	525	0	525	0	525	0	525	0	525	0	525	0	0	526.438	0.5625
1.5401	0	530	0	530	0	525	0	525	0	530	0	525	0	530	0	528	0	525	0	525	0	525	0	525	0	525	0	525	0	525	0	525	0	0	526.438	0.5625
1.5512	0	530	0	530	0	525	0	525	0	530	0	525	0	530	0	528	0	525	0	525	0	525	0	525	0	525	0	525	0	525	0	525	0	0	526.438	0.5625
1.5624	0	530	0	530	0	525	0	525	0	530	0	525	0	530	0	528	0	525	0	525	0	525	0	525	0	525	0	525	0	525	0	525	0	0	526.438	0.5625
1.5735	0	530	0	530	0	525	0	525	0	530	0	525	0	530	0	528	0	525	0	525	0	525	0	525	0	525	0	525	0	525	0	525	0	0	526.438	0.5625
1.5847	0	530	0	530	0	525	0	525	0	530	0	525	0	530	0	528	0	525	0	525	0	525	0	525	0	525	0	525	0	525	0	525	0	0	526.438	0.5625
1.5959	0	530	0	530	0	525	0	525	0	530	0	525	0	530	0	528	0	525	0	525	0	525	0	525	0	525	0	525	0	525	0	525	0	0	526.438	0.5625
1.607	0	530	0	530	0	525	0	525	0	530	0	525	0	530	0	528	0	525	0	525	0	525	0	525	0	525	0	525	0	525	0	525	0	0	526.438	0.5625
1.6182	0	530	0	530	0	525	0	525	0	530	0	525	0	530	0	528	0	525	0	525	0	525	0	525	0	525	0	525	0	525	0	525	0	0	526.438	0.5625
1.6293	0	530	0	530	0	525	0	525	0	530	0	525	0	530	0	528	0	525	0	525	0	525	0	525	0	525	0	525	0	525	0	525	0	0	526.438	0.5625
1.6405	0	530	0	530	0	525	0	525	0	530	0	525	0	530	0	528	0	525	0	525	0	525	0	525	0	525	0	525	0	525	0	525	0	0	526.438	0.5625
1.6517	0	530	0	530	0	525	0	525	0	530	0	525	0	530	0	528	0	525	0	525	0	525	0	525	0	525	0	525	0	525	0	525	0	0	526.438	0.5625
1.6628	0	530	0	530	0	525	0	525	0	530	0	525	0	530	0	528	0	525	0	525	0	525	0	525	0	525	0	525	0	525	0	525	0	0	526.438	0.5625
1.674	0	530	0	530	0	525	0	525	0	530	0	525	0	530	0	528	0	525	0	525	0	525	0	525	0	525	0	525	0	525	0	525	0	0	526.438	0.5625
1.6851	0	530	0	530	0	525	0	525	0	530	0	525	0	530	0	528	0	525	0	525	0	525	0	525	0	525	0	525	0	525	0	525	0	0	526.438	0.5625
1.6963	0	530	0	530	0	525	0	525	0	530	0	525	0	530	0	528	0	525	0	525	0	525	0	525	0	525	0	525	0	525	0	525	0	0	526.438	0.5625
1.7075	0	530	0	530	0	525	0	525	0	530	0	525	0	530	0	528	0	525	0	525	0	525	0	525	0	525	0	525	0	525	0	525	0	0	526.438	0.5625
1.7186	0	530	0	530	0	525	0	525	0	530	0	525	0	530	0	528	0	525	0	525	0	525	0	525	0	525	0	525	0	525	0	525	0	0	526.438	0.5625
1.7298	0	530	0	530	0	525	0	525	0	530	0	525	0	530	0	528	0	525	0	525	0	525	0	525	0	525	0	525	0	525	0	525	0	0	526.438	0.5625
1.7409	0	530	0	530	0	525	0	525	0	530	0	525	0	530	0	528	0	525	0	525	0	525	0	525	0	525	0	525	0	525	0	525	0	0	526.438	0.5625
1.7521	0	530	0	530	0	525	0	525	0	530	0	525	0	530	0	528	0	525	0	525	0	525	0	525	0	525	0	525	0	525	0	525	0	0	526.438	0.5625
1.7633	0	530	0	530	0	525	0	525	0	530	0	525	0	530	0	528	0	525	0	525	0	525	0	525	0	525	0	525	0	525	0	525	0	0	526.438	0.5625
1.7744	0	530	0	530	0	525	0	525	0	530	0	525	0	530	0	528	0	525	0	525	0	525	0	525	0	525	0	525	0	525	0	525	0	0	526.438	0.5625
1.7856	0	530	0	530	0	525	0	525	0	530	0	525	0	530	0	528	0	525	0	525	0	525	0	525	0	525	0	525	0	525	0	525	0	0	526.438	0.5625
1.7967	0	530	0	530	0	525	0	525	0	530	0	525	0	530	0	528	0	525	0	525	0	525	0	525	0	525	0	525	0	525	0	525	0	0	526.438	0.5625
1.8079	0	530	0	530	0	525	0	525	0	530	0	525	0	530	0	528	0	525	0	525	0	525	0	525	0	525	0	525	0	525	0	525	0	0	526.438	0.5625
1.819	0	530	0	530	0	525	0	525	0	530	0	525	0	530	0	528	0	525	0	525	0	525	0	525	0	525	0	525	0	525	0	525	0	0	526.438	0.5625
1.8302	0	530	0	530	0	525	0	525	0	530	0	525	0	530	0	528	0	525	0	525	0	525	0	525	0	525	0	525	0	525	0	525	0	0	526.438	0.5625
1.8414	0	530	0	530	0	525	0	525	0	530	0	525	0	530	0	528	0	525	0	525	0	525	0	525	0	525	0	525	0	525	0	525	0	0	526.438	0.5625
1.8525	0	530	0	530	0	525	0	525	0	530	0	525	0	530	0	528	0	525	0	525	0	525	0	525	0	525	0	525	0	525	0	525	0	0	526.438	0.5625
1.8637	0	530	0	530	0	525	0	525	0	530	0	525	0	530	0	528	0	525	0	525	0	525	0	525	0	525	0	525	0	525	0	525	0	0	526.438	0.5625
1.8748	0	530	0	530	0	525	0	525	0	530	0	525	0	530	0	528	0	525	0	525	0	525	0	525	0	525	0	525	0	525	0	525	0	0	526.438	0.5625
1.886	0	530	0	530	0	525	0	525	0	530	0	525	0	530	0	528	0	525	0	525	0	525	0	525	0	525	0	525	0	525	0	525	0	0	526.438	0.5625
1.8972	0	530	0	530	0	525	0	525	0	530	0	525	0	530	0	528	0	525	0	525	0	525	0	525	0	525	0	525	0	525	0	525	0	0	526.438	0.5625
1.9083	0	530	0	530	0	525	0	525	0	530	0	525	0	530	0	528	0	525	0	525	0	525	0	525	0	525	0	525	0	525	0	525	0	0	526.438	0.5625
1.9195	0	530	0	530	0	525	0	525	0	530	0	525	0	530	0	528	0	525	0	525	0	525	0	525	0	525	0	525	0	525	0	525	0	0	526.438	0.5625
1.9306	0	530	0	530	0	525	0	525	0	530	0	525	0	530	0	528	0	525	0	525	0	525	0	525	0	525	0	525	0	525	0	525	0	0	526.438	0.5625
1.9418	0	530	0	530	0	525	0	525	0	530	0	525	0	530	0	528	0	525	0	525	0	525	0	525	0	525	0	525	0	525	0	525	0	0	526.438	0.5625
1.953	0	530	0	530	0	525	0	525	0	530	0	525	0	530	0	528	0	525	0	525	0	525	0	525	0	525	0	525	0	525	0	525	0	0	526.438	0.5625
1.9641	0	530	0	530	0	525	0	525	0	530	0	525	0	530	0	528	0	525	0	525	0	525	0	525	0	525	0	525	0	525	0	525	0	0	526.438	0.5625
1.9753	0	530	0	530	0	525	0	525	0	530	0	525	0	530	0	528	0	525	0	525	0	525	0	525	0	525	0	525	0	525	0	525	0	0	526.438	0.5625
1.9864	0	530	0	530	0	525	0	525	0	530	0	525	0	530	0	528	0	525	0	525	0	525	0	525	0	525	0	525	0	525	0	525	0	0	526.438	0.5625
1.9976	0	530	0	530	0	525	0	525	0	530	0	525	0	530	0	528	0	525	0	525	0	525	0	525	0	525	0	525	0	525	0	525	0	0	526.438	0.5625
2.0088	0	530	0	530	0	525	0	525	0	530	0	525	0	530	0	528	0	525	0	525	0	525	0	525	0	525	0	525	0	525	0	525	0	0	526.438	0.5625
2.0199	0	530	0	530	0	525	0	525	0	530	0	525	0	530	0	528	0	525	0	525	0	525	0	525	0	525	0	525	0	525	0	525	0	0	526.438	0.5625
2.0311	0	530	0	530	0	525	0	525	0	530	0	525	0	530	0	528	0	525	0	525	0	525	0	525	0	525	0	525	0	525	0	525	0	0	526.438	0.5625
2.0422	0	530	0	530	0	525	0	525	0	530	0	525	0	530	0	528	0	525	0	525	0	525	0	525	0	525	0	525	0	525	0	525	0	0	526.438	0.5625
2.0534	0	530	0	530	0	525	0	525	0	530	0	525	0	530	0	528	0	525	0	525	0	525	0	525	0	525	0	525	0	525	0	525	0	0	526.438	0.5625
2.0646	0	530	0	530	0	525	0	525	0	530	0	525	0	530	0	528	0	525	0	525	0	525	0	525	0	525	0	525	0	525	0	525	0	0	526.438	0.5625
2.0757	0	530	0	530	0	525	0	525	0	530	0	525	0	530	0	528	0	525	0	525	0	525	0	525	0	525	0	525	0	525	0	525	0	0	526.438	0.5625
2.0869	0	530	0	530	0	525	0	525	0	530	0	525	0	530	0	528	0	525	0	525	0	525	0	525	0	525	0	525	0	525	0	525	0	0	526.438	0.5625
2.098	0	530	0	530	0	525	0	525	0	530	0	525	0	530	0	528	0	525	0	525	0	525	0	525	0	525	0	525	0	525	0	525	0	0	526.438	0.5625
2.1092	0	530	0	530	0	525	0	525	0	530	0	525	0	530	0	528	0	525	0	525	0	525	0	525	0	525	0	525	0	525	0	525	0	0	526.438	0.5625
2.1204	0	530	0	530	0	525	0	525	0	530	0	525	0	530	0	528	0	525	0	525	0	525	0	525	0	525	0	525	0	525	0	525	0	0	526.438	0.5625
2.1315	0	530	0	530	0	525	0	525	0	530	0	525	0	530	0	528	0	525	0	525	0	525	0	525	0	525	0	525	0	525	0	525	0	0	526.438	0.5625
2.1427	0	530	0	530	0	525	0	525	0	530	0	525	0	530	0	528	0	525	0	525	0	525	0	525	0	525	0	525	0	525	0	525	0	0	526.438	0.5625
2.1538	0	530	0	530	0	525	0	525	0	530	0	525	0	530	0	528	0	525	0	525	0	525	0	525	0	525	0	525	0	525	0	525	0	0	526.438	0.5625
2.165	0	530	0	530	0	525	0	525	0	530	0	525	0	530	0	528	0	525	0	525	0	525	0	525	0	525	0	525	0	525	0	525	0	0	526.438	0.5625
2.1762	0	530	0	530	0	525	0	525	0	530	0	525	0	530	0	528	0	525	0	525	0	525	0	525	0	525	0	525	0	525	0	525	0	0	526.438	0.5625
2.1873	0	530	0	530	0	525	0	525	0	530	0	525	0	530	0	528	0	525	0	525	0	525	0	525	0	525	0	525	0	525	0	525	0	0	526.438	0.5625
2.1985	0	530	0	530	0	525	0	525	0	530	0	525	0	530	0	528	0	525	0	525	0	525	0	525	0	525	0	525	0	525	0	525	0	0	526.438	0.5625
2.2096	0	530	0	530	0	525	0	525	0	530	0	525	0	530	0	528	0	525	0	525	0	525	0	525	0	525	0	525	0	525	0	525	0	0	526.438	0.5625
2.2208	0	530	0	530	0	525	0	525	0	530	0	525	0	530	0	528	0	525	0	525	0	525	0	525	0	525	0	525	0	525	0	525	0	0	526.438	0.5625
2.232	0	530	0	530	0	525	0	525	0	530	0	525	0	530	0	528	0	525	0	525	0	525	0	525	0	525	0	525	0	525	0	525	0	0	526.438	0.5625
2.2431	0	530	0	530	0	525	0	525	0	530	0	525	0	530	0	528	0	525	0	525	0	525	0	525	0	525	0	525	0	525	0	525	0	0	526.438	0.5625
2.2543	0	530	0	530	0	525	0	525	0	530	0	525	0	530	0	528	0	525	0	525	0	525	0	525	0	525	0	525	0	525	0	525	0	0	526.438	0.5625
2.2654	0	530	0	530	0	525	0	525	0	530	0	525	0	530	0	528	0	525	0	525	0	525	0	525	0	525	0	525	0	525	0	525	0	0	526.438	0.5625
2.2766	0	530	0	530	0	525	0	525	0	530	0	525	0	530	0	528	0	525	0	525	0	525	0	525	0	525	0	525	0	525	0	525	0	0	526.438	0.5625
2.2878	0	530	0	530	0	525	0	525	0	530	0	525	0	530	0	528	0	525	0	525	0	525	0	525	0	525	0	525	0	525	0	525	0	0	526.438	0.5625
2.2989	0	530	0	530	0	525	0	525	0	530	0	525	0	530	0	528	0	525	0	525	0	525	0	525	0	525	0	525	0	525	0	525	0	0	526.438	0.5625
2.3101	0	530	0	530	0	525	0	525	0	530	0	525	0	530	0	528	0	525	0	525	0	525	0	525	0	525	0	525	0	525	0	525	0	0	526.438	0.5625
2.3212	0	530	0	530	0	525	0	525	0	530	0	525	0	530	0	528	0	525	0	525	0	525	0	525	0	525	0	525	0	525	0	525	0	0	526.438	0.5625
2.3324	0	530	0	530	0	525	0	525	0	530	0	525	0	530	0	528	0	525	0	525	0	525	0	525	0	525	0	525	0	525	0	525	0	0	526.438	0.5625
2.3436	0	530	0	530	0	525	0	525	0	530	0	525	0	530	0	528	0	525	0	525	0	525	0	525	0	525	0	525	0	525	0	525	0	0	526.438	0.5625
2.3547	0	530	0	530	0	525	0	525	0	530	0	525	0	530	0	528	0	525	0	525	0	525	0	525	0	525	0	525	0	525	0	525	0	0	526.438	0.5625
2.3659	0	530	0	530	0	525	0	525	0	530	0	525	0	530	0	528	0	525	0	525	0	525	0	525	0	525	0	525	0	525	0	525	0	0	526.438	0.5625
2.377	0	530	0	530	0	525	0	525	0	530	0	525	0	530	0	528	0	525	0	525	0	525	0	525	0	525	0	525	0	525	0	525	0	0	526.438	0.5625
2.3882	0	530	0	530	0	525	0	525	0	530	0	525	0	530	0	528	0	525	0	525	0	525	0	525	0	525	0	525	0	525	0	525	0	0	526.438	0.5625
2.3994	0	530	0	530	0	525	0	525	0	530	0	525	0	530	0	528	0	525	0	525	0	525	0	525	0	525	0	525	0	525	0	525	0	0	526.438	0.5625
2.4105	0	530	0	530	0	525	0	525	0	530	0	525	0	530	0	528	0	525	0	525	0	525	0	525	0	525	0	525	0	525	0	525	0	0	526.438	0.5625
2.4217	0	530	0	530	0	525	0	525	0	530	0	525	0	530	0	528	0	525	0	525	0	525	0	525	0	525	0	525	0	525	0	525	0	0	526.438	0.5625
2.4328	0	530	0	530	0	525	0	525	0	530	0	525	0	530	0	528	0	525	0	525	0	525	0	525	0	525	0	525	0	525	0	525	0	0	526.438	0.5625
2.444	0	530	0	530	0	525	0	525	0	530	0	525	0	530	0	528	0	525	0	525	0	525	0	525	0	525	0	525	0	525	0	525	0	0	526.438	0.5625
2.4552	0	530	0	530	0	525	0	525	0	530	0	525	0	530	0	528	0	525	0	525	0	525	0	525	0	525	0	525	0	525	0	525	0	0	526.438	0.5625
2.4663	0	530	0	530	0	525	0	525	0	530	0	525	0	530	0	528	0	525	0	525	0	525	0	525	0	525	0	525	0	525	0	525	0	0	526.438	0.5625
2.4775	0	530	0	530	0	525	0	525	0	530	0	525	0	530	0	528	0	525	0	525	0	525	0	525	0	525	0	525	0	525	0	525	0	0	526.438	0.5625
2.4886	0	530	0	530	0	525	0	525	0	530	0	525	0	530	0	528	0	525	0	525	0	525	0	525	0	525	0	525	0	525	0	525	0	0	526.438	0.5625
2.4998	0	530	0	530	0	525	0	525	0	530	0	525	0	530	0	528	0	525	0	525	0	525	0	525	0	525	0	525	0	525	0	525	0	0	526.438	0.5625
2.511	0	530	0	530	0	525	0	525	0	530	0	525	0	530	0	528	0	525	0	525	0	525	0	525	0	525	0	525	0	525	0	525	0	0	526.438	0.5625
2.5221	0	530	0	530	0	525	0	525	0	530	0	525	0	530	0	528	0	525	0	525	0	525	0	525	0	525	0	525	0	525	0	525	0	0	526.438	0.5625
2.5333	0	530	0	530	0	525	0	525	0	530	0	525	0	530	0	528	0	525	0	525	0	525	0	525	0	525	0	525	0	525	0	525	0	0	526.438	0.5625
2.5444	0	530	0	530	0	525	0	525	0	530	0	525	0	530	0	528	0	525	0	525	0	525	0	525	0	525	0	525	0	525	0	525	0	0	526.438	0.5625
2.5556	0	530	0	530	0	525	0	525	0	530	0	525	0	530	0	528	0	525	0	525	0	525	0	525	0	525	0	525	0	525	0	525	0	0	526.438	0.5625
2.5668	0	530	0	530	0	525	0	525	0	530	0	525	0	530	0	528	0	525	0	525	0	525	0	525	0	525	0	525	0	525	0	525	0	0	526.438	0.5625
2.5779	0	530	0	530	0	525	0	525	0	530	0	525	0	530	0	528	0	525	0	525	0	525	0	525	0	525	0	525	0	525	0	525	0	0	526.438	0.5625
2.5891	0	530	0	530	0	525	0	525	0	530	0	525	0	530	0	528	0	525	0	525	0	525	0	525	0	525	0	525	0	525	0	525	0	0	526.438	0.5625
2.6002	0	530	0	530	0	525	0	525	0	530	0	525	0	530	0	528	0	525	0	525	0	525	0	525	0	525	0	525	0	525	0	525	0	0	526.438	0.5625
2.6114	0	530	0	530	0	525	0	525	0	530	0	525	0	530	0	528	0	525	0	525	0	525	0	525	0	525	0	525	0	525	0	525	0	0	526.438	0.5625
2.6226	0	530	0	530	0	525	0	525	0	530	0	525	0	530	0	528	0	525	0	525	0	525	0	525	0	525	0	525	0	525	0	525	0	0	526.438	0.5625
2.6337	0	530	0	530	0	525	0	525	0	530	0	525	0	530	0	528	0	525	0	525	0	525	0	525	0	525	0	525	0	525	0	525	0	0	526.438	0.5625
2.6449	0	530	0	530	0	525	0	525	0	530	0	525	0	530	0	528	0	525	0	525	0	525	0	525	0	525	0	525	0	525	0	525	0	0	526.438	0.5625
2.656	0	530	0	530	0	525	0	525	0	530	0	525	0	530	0	528	0	525	0	525	0	525	0	525	0	525	0	525	0	525	0	525	0	0	526.438	0.5625
2.6672	0	530	0	530	0	525	0	525	0	530	0	525	0	530	0	528	0	525	0	525	0	525	0	525	0	525	0	525	0	525	0	525	0	0	526.438	0.5625
2.6784	0	530	0	530	0	525	0	525	0	530	0	525	0	530	0	528	0	525	0	525	0	525	0	525	0	525	0	525	0	525	0	525	0	0	526.438	0.5625
2.6895	0	530	0	530	0	525	0	525	0	530	0	525	0	530	0	528	0	525	0	525	0	525	0	525	0	525	0	525	0	525	0	525	0	0	526.438	0.5625
2.7007	0	530	0	530	0	525	0	525	0	530	0	525	0	530	0	528	0	525	0	525	0	525	0	525	0	525	0	525	0	525	0	525	0	0	526.438	0.5625
2.7118	0	530	0	530	0	525	0	525	0	530	0	525	0	530	0	528	0	525	0	525	0	525	0	525	0	525	0	525	0	525	0	525	0	0	526.438	0.5625
2.723	0	530	0	530	0	525	0	525	0	530	0	525	0	530	0	528	0	525	0	525	0	525	0	525	0	525	0	525	0	525	0	525	0	0	526.438	0.5625
2.7342	0	530	0	530	0	525	0	525	0	530	0	525	0	530	0	528	0	525	0	525	0	525	0	525	0	525	0	525	0	525	0	525	0	0	526.438	0.5625
2.7453	0	530	0	530	0	525	0	525	0	530	0	525	0	530	0	528	0	525	0	525	0	525	0	525	0	525	0	525	0	525	0	525	0	0	526.438	0.5625
2.7565	0	530	0	530	0	525	0	525	0	530	0	525	0	530	0	528	0	525	0	525	0	525	0	525	0	525	0	525	0	525	0	525	0	0	526.438	0.5625
2.7676	0	530	0	530	0	525	0	525	0	530	0	525	0	530	0	528	0	525	0	525	0	525	0	525	0	525	0	525	0	525	0	525	0	0	526.438	0.5625
2.7788	0	530	0	530	0	525	0	525	0	530	0	525	0	530	0	528	0	525	0	525	0	525	0	525	0	525	0	525	0	525	0	525	0	0	526.438	0.5625
2.79	0	530	0	530	0	525	0	525	0	530	0	525	0	530	0	528	0	525	0	525	0	525	0	525	0	525	0	525	0	525	0	525	0	0	526.438	0.5625
2.8011	0	530	0	530	0	525	0	525	0	530	0	525	0	530	0	528	0	525	0	525	0	525	0	525	0	525	0	525	0	525	0	525	0	0	526.438	0.5625
2.8123	0	530	0	530	0	525	0	525	0	530	0	525	0	530	0	528	0	525	0	525	0	525	0	525	0	525	0	525	0	525	0	525	0	0	526.438	0.5625
2.8234	0	530	0	530	0	525	0	525	0	530	0	525	0	530	0	528	0	525	0	525	0	525	0	525	0	525	0	525	0	525	0	525	0	0	526.438	0.5625
2.8346	0	530	0	530	0	525	0	525	0	530	0	525	0	530	0	528	0	525	0	525	0	525	0	525	0	525	0	525	0	525	0	525	0	0	526.438	0.5625
2.8458	0	530	0	530	0	525	0	525	0	530	0	525	0	530	0	528	0	525	0	525	0	525	0	525	0	525	0	525	0	525	0	525	0	0	526.438	0.5625
2.8569	0	530	0	530	0	525	0	525	0	530	0	525	0	530	0	528	0	525	0	525	0	525	0	525	0	525	0	525	0	525	0	525	0	0	526.438	0.5625
2.8681	0	530	0	530	0	525	0	525	0	530	0	525	0	530	0	528	0	525	0	525	0	525	0	525	0	525	0	525	0	525	0	525	0	0	526.438	0.5625
2.8792	0	530	0	530	0	525	0	525	0	530	0	525	0	530	0	528	0	525	0	525	0	525	0	525	0	525	0	525	0	525	0	525	0	0	526.438	0.5625
2.8904	0	530	0	530	0	525	0	525	0	530	0	525	0	530	0	528	0	525	0	525	0	525	0	525	0	525	0	525	0	525	0	525	0	0	526.438	0.5625
2.9016	0	530	0	530	0	525	0	525	0	530	0	525	0	530	0	528	0	525	0	525	0	525	0	525	0	525	0	525	0	525	0	525	0	0	526.438	0.5625
2.9127	0	530	0	530	0	525	0	525	0	530	0	525	0	530	0	528	0	525	0	525	0	525	0	525	0	525	0	525	0	525	0	525	0	0	526.438	0.5625
2.9239	0	530	0	530	0	525	0	525	0	530	0	525	0	530	0	528	0	525	0	525	0	525	0	525	0	525	0	525	0	525	0	525	0	0	526.438	0.5625
2.935	0	530	0	530	0	525	0	525	0	530	0	525	0	530	0	528	0	525	0	525	0	525	0	525	0	525	0	525	0	525	0	525	0	0	526.438	0.5625
2.9462	0	530	0	530	0	525	0	525	0	530	0	525	0	530	0	528	0	525	0	525	0	525	0	525	0	525	0	525	0	525	0	525	0	0	526.438	0.5625
2.9574	0	530	0	530	0	525	0	525	0	530	0	525	0	530	0	528	0	525	0	525	0	525	0	525	0	525	0	525	0	525	0	525	0	0	526.438	0.5625
2.9685	0	530	0	530	0	525	0	525	0	530	0	525	0	530	0	528	0	525	0	525	0	525	0	525	0	525	0	525	0	525	0	525	0	0	526.438	0.5625
2.9797	0	530	0	530	0	525	0	525	0	530	0	525	0	530	0	528	0	525	0	525	0	525	0	525	0	525	0	525	0	525	0	525	0	0	526.438	0.5625
2.9908	0	530	0	530	0	525	0	525	0	530	0	525	0	530	0	528	0	525	0	525	0	525	0	525	0	525	0	525	0	525	0	525	0	0	526.438	0.5625
3.002	0	530	0	530	0	525	0	525	0	530	0	525	0	530	0	528	0	525	0	525	0	525	0	525	0	525	0	525	0	525	0	525	0	0	526.438	0.5625
3.0131	0	530	0	530	0	525	0	525	0	530	0	525	0	530	0	528	0	525	0	525	0	525	0	525	0	525	0	525	0	525	0	525	0	0	526.438	0.5625
3.0243	0	530	0	530	0	525	0	525	0	530	0	525	0	530	0	528	0	525	0	525	0	525	0	525	0	525	0	525	0	525	0	525	0	0	526.438	0.5625
3.0355	0	530	0	530	0	525	0	525	0	530	0	525	0	530	0	528	0	525	0	525	0	525	0	525	0	525	0	525	0	525	0	525	0	0	526.438	0.5625
3.0466	0	530	0	530	0	525	0	525	0	530	0	525	0	530	0	528	0	525	0	525	0	525	0	525	0	525	0	525	0	525	0	525	0	0	526.438	0.5625
3.0578	0	530	0	530	0	525	0	525	0	530	0	525	0	530	0	528	0	525	0	525	0	525	0	525	0	525	0	525	0	525	0	525	0	0	526.438	0.5625
3.0689	0	530	0	530	0	525	0	525	0	530	0	525	0	530	0	528	0	525	0	525	0	525	0	525	0	525	0	525	0	525	0	525	0	0	526.438	0.5625
3.0801	0	530	0	530	0	525	0	525	0	530	0	525	0	530	0	528	0	525	0	525	0	525	0	525	0	525	0	525	0	525	0	525	0	0	526.438	0.5625
3.0913	0	530	0	530	0	525	0	525	0	530	0	525	0	530	0	528	0	525	0	525	0	525	0	525	0	525	0	525	0	525	0	525	0	0	526.438	0.5625
3.1024	0	530	0	530	0	525	0	525	0	530	0	525	0	530	0	528	0	525	0	525	0	525	0	525	0	525	0	525	0	525	0	525	0	0	526.438	0.5625
3.1136	0	530	0	530	0	525	0	525	0	530	0	525	0	530	0	528	0	525	0	525	0	525	0	525	0	525	0	525	0	525	0	525	0	0	526.438	0.5625
3.1247	0	530	0	530	0	525	0	525	0	530	0	525	0	530	0	528	0	525	0	525	0	525	0	525	0	525	0	525	0	525	0	525	0	0	526.438	0.5625
3.1359	0	530	0	530	0	525	0	525	0	530	0	525	0	530	0	528	0	525	0	525	0	525	0	525	0	525	0	525	0	525	0	525	0	0	526.438	0.5625
3.1471	0	530	0	530	0	525	0	525	0	530	0	525	0	530	0	528	0	525	0	525	0	525	0	525	0	525	0	525	0	525	0	525	0	0	526.438	0.5625
3.1582	0	530	0	530	0	525	0	525	0	530	0	525	0	530	0	528	0	525	0	525	0	525	0	525	0	525	0	525	0	525	0	525	0	0	526.438	0.5625
3.1694	0	530	0	530	0	525	0	525	0	530	0	525	0	530	0	528	0	525	0	525	0	525	0	525	0	525	0	525	0	525	0	525	0	0	526.438	0.5625
3.1805	0	530	0	530	0	525	0	525	0	530	0	525	0	530	0	528	0	525	0	525	0	525	0	525	0	525	0	525	0	525	0	525	0	0	526.438	0.5625
3.1917	0	530	0	530	0	525	0	525	0	530	0	525	0	530	0	528	0	525	0	525	0	525	0	525	0	525	0	525	0	525	0	525	0	0	526.438	0.5625
3.2029	0	530	0	530	0	525	0	525	0	530	0	525	0	530	0	528	0	525	0	525	0	525	0	525	0	525	0	525	0	525	0	525	0	0	526.438	0.5625
3.214	0	530	0	530	0	525	0	525	0	530	0	525	0	530	0	528	0	525	0	525	0	525	0	525	0	525	0	525	0	525	0	525	0	0	526.438	0.5625
3.2252	0	530	0	530	0	525	0	525	0	530	0	525	0	530	0	528	0	525	0	525	0	525	0	525	0	525	0	525	0	525	0	525	0	0	526.438	0.5625
3.2363	0	530	0	530	0	525	0	525	0	530	0	525	0	530	0	528	0	525	0	525	0	525	0	525	0	525	0	525	0	525	0	525	0	0	526.438	0.5625
3.2475	0	530	0	530	0	525	0	525	0	530	0	525	0	530	0	528	0	525	0	525	0	525	0	525	0	525	0	525	0	525	0	525	0	0	526.438	0.5625
3.2587	0	530	0	530	0	525	0	525	0	530	0	525	0	530	0	528	0	525	0	525	0	525	0	525	0	525	0	525	0	525	0	525	0	0	526.438	0.5625
3.2698	0	530	0	530	0	525	0	525	0	530	0	525	0	530	0	528	0	525	0	525	0	525	0	525	0	525	0	525	0	525	0	525	0	0	526.438	0.5625
3.281	0	530	0	530	0	525	0	525	0	530	0	525	0	530	0	528	0	525	0	525	0	525	0	525	0	525	0	525	0	525	0	525	0	0	526.438	0.5625
3.2921	0	530	0	530	0	525	0	525	0	530	0	525	0	530	0	528	0	525	0	525	0	525	0	525	0	525	0	525	0	525	0	525	0	0	526.438	0.5625
3.3033	0	530	0	530	0	525	0	525	0	530	0	525	0	530	0	528	0	525	0	525	0	525	0	525	0	525	0	525	0	525	0	525	0	0	526.438	0.5625
3.3145	0	530	0	530	0	525	0	525	0	530	0	525	0	530	0	528	0	525	0	525	0	525	0	525	0	525	0	525	0	525	0	525	0	0	526.438	0.5625
3.3256	0	530	0	530	0	525	0	525	0	530	0	525	0	530	0	528	0	525	0	525	0	525	0	525	0	525	0	525	0	525	0	525	0	0	526.438	0.5625
3.3368	0	530	0	530	0	525	0	525	0	530	0	525	0	530	0	528	0	525	0	525	0	525	0	525	0	525	0	525	0	525	0	525	0	0	526.438	0.5625
3.3479	0	530	0	530	0	525	0	525	0	530	0	525	0	530	0	528	0	525	0	525	0	525	0	525	0	525	0	525	0	525	0	525	0	0	526.438	0.5625
3.3591	0	530	0	530	0	525	0	525	0	530	0	525	0	530	0	528	0	525	0	525	0	525	0	525	0	525	0	525	0	525	0	525	0	0	526.438	0.5625
3.3703	0	530	0	530	0	525	0	525	0	530	0	525	0	530	0	528	0	525	0	525	0	525	0	525	0	525	0	525	0	525	0	525	0	0	526.438	0.5625
3.3814	0	530	0	530	0	525	0	525	0	530	0	525	0	530	0	528	0	525	0	525	0	525	0	525	0	525	0	525	0	525	0	525	0	0	526.438	0.5625
3.3926	0	530	0	530	0	525	0	525	0	530	0	525	0	530	0	528	0	525	0	525	0	525	0	525	0	525	0	525	0	525	0	525	0	0	526.438	0.5625
3.4037	0	530	0	530	0	525	0	525	0	530	0	525	0	530	0	528	0	525	0	525	0	525	0	525	0	525	0	525	0	525	0	525	0	0	526.438	0.5625
3.4149	0	530	0	530	0	525	0	525	0	530	0	525	0	530	0	528	0	525	0	525	0	525	0	525	0	525	0	525	0	525	0	525	0	0	526.438	0.5625
3.4261	0	530	0	530	0	525	0	525	0	530	0	525	0	530	0	528	0	525	0	525	0	525	0	525	0	525	0	525	0	525	0	525	0	0	526.438	0.5625
3.4372	0	530	0	530	0	525	0	525	0	530	0	525	0	530	0	528	0	525	0	525	0	525	0	525	0	525	0	525	0	525	0	525	0	0	526.438	0.5625
3.4484	0	530	0	530	0	525	0	525	0	530	0	525	0	530	0	528	0	525	0	525	0	525	0	525	0	525	0	525	0	525	0	525	0	0	526.438	0.5625
3.4595	0	530	0	530	0	525	0	525	0	530	0	525	0	530	0	528	0	525	0	525	0	525	0	525	0	525	0	525	0	525	0	525	0	0	526.438	0.5625
3.4707	0	530	0	530	0	525	0	525	0	530	0	525	0	530	0	528	0	525	0	525	0	525	0	525	0	525	0	525	0	525	0	525	0	0	526.438	0.5625
3.4819	0	530	0	530	0	525	0	525	0	530	0	525	0	530	0	528	0	525	0	525	0	525	0	525	0	525	0	525	0	525	0	525	0	0	526.438	0.5625
3.493	0	530	0	530	0	525	0	525	0	530	0	525	0	530	0	528	0	525	0	525	0	525	0	525	0	525	0	525	0	525	0	525	0	0	526.438	0.5625
3.5042	0	530	0	530	0	525	0	525	0	530	0	525	0	530	0	528	0	525	0	525	0	525	0	525	0	525	0	525	0	525	0	525	0	0	526.438	0.5625
3.5153	0	530	0	530	0	525	0	525	0	530	0	525	0	530	0	528	0	525	0	525	0	525	0	525	0	525	0	525	0	525	0	525	0	0	526.438	0.5625
3.5265	0	530	0	530	0	525	0	525	0	530	0	525	0	530	0	528	0	525	0	525	0	525	0	525	0	525	0	525	0	525	0	525	0	0	526.438	0.5625
3.5377	0	530	0	530	0	525	0	525	0	530	0	525	0	530	0	528	0	525	0	525	0	525	0	525	0	525	0	525	0	525	0	525	0	0	526.438	0.5625
3.5488	0	530	0	530	0	525	0	525	0	530	0	525	0	530	0	528	0	525	0	525	0	525	0	525	0	525	0	525	0	525	0	525	0	0	526.438	0.5625
3.56	0	530	0	530	0	525	0	525	0	530	0	525	0	530	0	528	0	525	0	525	0	525	0	525	0	525	0	525	0	525	0	525	0	0	526.438	0.5625
3.5711	0	530	0	530	0	525	0	525	0	530	0	525	0	530	0	528	0	525	0	525	0	525	0	525	0	525	0	525	0	525	0	525	0	0	526.438	0.5625
3.5823	0	530	0	530	0	525	0	525	0	530	0	525	0	530	0	528	0	525	0	525	0	525	0	525	0	525	0	525	0	525	0	525	0	0	526.438	0.5625
3.5935	0	530	0	530	0	525	0	525	0	530	0	525	0	530	0	528	0	525	0	525	0	525	0	525	0	525	0	525	0	525	0	525	0	0	526.438	0.5625
3.6046	0	530	0	530	0	525	0	525	0	530	0	525	0	530	0	528	0	525	0	525	0	525	0	525	0	525	0	525	0	525	0	525	0	0	526.438	0.5625
3.6158	0	530	0	530	0	525	0	525	0	530	0	525	0	530	0	528	0	525	0	525	0	525	0	525	0	525	0	525	0	525	0	525	0	0	526.438	0.5625
3.6269	0	530	0	530	0	525	0	525	0	530	0	525	0	530	0	528	0	525	0	525	0	525	0	525	0	525	0	525	0	525	0	525	0	0	526.438	0.5625
3.6381	0	530	0	530	0	525	0	525	0	530	0	525	0	530	0	528	0	525	0	525	0	525	0	525	0	525	0	525	0	525	0	525	0	0	526.438	0.5625
3.6493	0	530	0	530	0	525	0	525	0	530	0	525	0	530	0	528	0	525	0	525	0	525	0	525	0	525	0	525	0	525	0	525	0	0	526.438	0.5625
3.6604	0	530	0	530	0	525	0	525	0	530	0	525	0	530	0	528	0	525	0	525	0	525	0	525	0	525	0	525	0	525	0	525	0	0	526.438	0.5625
3.6716	0	530	0	530	0	525	0	525	0	530	0	525	0	530	0	528	0	525	0	525	0	525	0	525	0	525	0	525	0	525	0	525	0	0	526.438	0.5625
3.6827	0	530	0	530	0	525	0	525	0	530	0	525	0	530	0	528	0	525	0	525	0	525	0	525	0	525	0	525	0	525	0	525	0	0	526.438	0.5625
3.6939	0	530	0	530	0	525	0	525	0	530	0	525	0	530	0	528	0	525	0	525	0	525	0	525	0	525	0	525	0	525	0	525	0	0	526.438	0.5625
3.7051	0	530	0	530	0	525	0	525	0	530	0	525	0	530	0	528	0	525	0	525	0	525	0	525	0	525	0	525	0	525	0	525	0	0	526.438	0.5625
3.7162	0	530	0	530	0	525	0	525	0	530	0	525	0	530	0	528	0	525	0	525	0	525	0	525	0	525	0	525	0	525	0	525	0	0	526.438	0.5625
3.7274	0	530	0	530	0	525	0	525	0	530	0	525	0	530	0	528	0	525	0	525	0	525	0	525	0	525	0	525	0	525	0	525	0	0	526.438	0.5625
3.7385	0	530	0	530	0	525	0	525	0	530	0	525	0	530	0	528	0	525	0	525	0	525	0	525	0	525	0	525	0	525	0	525	0	0	526.438	0.5625
3.7497	0	530	0	530	0	525	0	525	0	530	0	525	0	530	0	528	0	525	0	525	0	525	0	525	0	525	0	525	0	525	0	525	0	0	526.438	0.5625
3.7609	0	530	0	530	0	525	0	525	0	530	0	525	0	530	0	528	0	525	0	525	0	525	0	525	0	525	0	525	0	525	0	525	0	0	526.438	0.5625
3.772	0	530	0	530	0	525	0	525	0	530	0	525	0	530	0	528	0	525	0	525	0	525	0	525	0	525	0	525	0	525	0	525	0	0	526.438	0.5625
3.7832	0	530	0	530	0	525	0	525	0	530	0	525	0	530	0	528	0	525	0	525	0	525	0	525	0	525	0	525	0	525	0	525	0	0	526.438	0.5625
3.7943	0	530	0	530	0	525	0	525	0	530	0	525	0	530	0	528	0	525	0	525	0	525	0	525	0	525	0	525	0	525	0	525	0	0	526.438	0.5625
3.8055	0	530	0	530	0	525	0	525	0	530	0	525	0	530	0	528	0	525	0	525	0	525	0	525	0	525	0	525	0	525	0	525	0	0	526.438	0.5625
3.8167	0	530	0	530	0	525	0	525	0	530	0	525	0	530	0	528	0	525	0	525	0	525	0	525	0	525	0	525	0	525	0	525	0	0	526.438	0.5625
3.8278	0	530	0	530	0	525	0	525	0	530	0	525	0	530	0	528	0	525	0	525	0	525	0	525	0	525	0	525	0	525	0	525	0	0	526.438	0.5625
3.839	0	530	0	530	0	525	0	525	0	530	0	525	0	530	0	528	0	525	0	525	0	525	0	525	0	525	0	525	0	525	0	525	0	0	526.438	0.5625
3.8501	0	530	0	530	0	525	0	525	0	530	0	525	0	530	0	528	0	525	0	525	0	525	0	525	0	525	0	525	0	525	0	525	0	0	526.438	0.5625
3.8613	0	530	0	530	0	525	0	525	0	530	0	525	0	530	0	528	0	525	0	525	0	525	0	525	0	525	0	525	0	525	0	525	0	0	526.438	0.5625
3.8725	0	530	0	530	0	525	0	525	0	530	0	525	0	530	0	528	0	525	0	525	0	525	0	525	0	525	0	525	0	525	0	525	0	0	526.438	0.5625
3.8836	0	530	0	530	0	525	0	525	0	530	0	525	0	530	0	528	0	525	0	525	0	525	0	525	0	525	0	525	0	525	0	525	0	0	526.438	0.5625
3.8948	0	530	0	530	0	525	0	525	0	530	0	525	0	530	0	528	0	525	0	525	0	525	0	525	0	525	0	525	0	525	0	525	0	0	526.438	0.5625
3.9059	0	530	0	530	0	525	0	525	0	530	0	525	0	530	0	528	0	525	0	525	0	525	0	525	0	525	0	525	0	525	0	525	0	0	526.438	0.5625
3.9171	0	530	0	530	0	525	0	525	0	530	0	525	0	530	0	528	0	525	0	525	0	525	0	525	0	525	0	525	0	525	0	525	0	0	526.438	0.5625
3.9283	0	530	0	530	0	525	0	525	0	530	0	525	0	530	0	528	0	525	0	525	0	525	0	525	0	525	0	525	0	525	0	525	0	0	526.438	0.5625
3.9394	0	530	0	530	0	525	0	525	0	530	0	525	0	530	0	528	0	525	0	525	0	525	0	525	0	525	0	525	0	525	0	525	0	0	526.438	0.5625
3.9506	0	530	0	530	0	525	0	525	0	530	0	525	0	530	0	528	0	525	0	525	0	525	0	525	0	525	0	525	0	525	0	525	0	0	526.438	0.5625
3.9617	0	530	0	530	0	525	0	525	0	530	0	525	0	530	0	528	0	525	0	525	0	525	0	525	0	525	0	525	0	525	0	525	0	0	526.438	0.5625
3.9729	0	530	0	530	0	525	0	525	0	530	0	525	0	530	0	528	0	525	0	525	0	525	0	525	0	525	0	525	0	525	0	525	0	0	526.438	0.5625
3.9841	0	530	0	530	0	525	0	525	0	530	0	525	0	530	0	528	0	525	0	525	0	525	0	525	0	525	0	525	0	525	0	525	0	0	526.438	0.5625
3.9952	0	530	0	530	0	525	0	525	0	530	0	525	0	530	0	528	0	525	0	525	0	525	0	525	0	525	0	525	0	525	0	525	0	0	526.438	0.5625
4.0064	0	530	0	530	0	525	0	525	0	530	0	525	0	530	0	528	0	525	0	525	0	525	0	525	0	525	0	525	0	525	0	525	0	0	526.438	0.5625
4.0175	0	530	0	530	0	525	0	525	0	530	0	525	0	530	0	528	0	525	0	525	0	525	0	525	0	525	0	525	0	525	0	525	0	0	526.438	0.5625
4.0287	0	530	0	530	0	525	0	525	0	530	0	525	0	530	0	528	0	525	0	525	0	525	0	525	0	525	0	525	0	525	0	525	0	0	526.438	0.5625
4.0399	0	530	0	530	0	525	0	525	0	530	0	525	0	530	0	528	0	525	0	525	0	525	0	525	0	525	0	525	0	525	0	525	0	0	526.438	0.5625
4.051	0	530	0	530	0	525	0	525	0	530	0	525	0	530	0	528	0	525	0	525	0	525	0	525	0	525	0	525	0	525	0	525	0	0	526.438	0.5625
4.0622	0	530	0	530	0	525	0	525	0	530	0	525	0	530	0	528	0	525	0	525	0	525	0	525	0	525	0	525	0	525	0	525	0	0	526.438	0.5625
4.0733	0	530	0	530	0	525	0	525	0	530	0	525	0	530	0	528	0	525	0	525	0	525	0	525	0	525	0	525	0	525	0	525	0	0	526.438	0.5625
4.0845	0	530	0	530	0	525	0	525	0	530	0	525	0	530	0	528	0	525	0	525	0	525	0	525	0	525	0	525	0	525	0	525	0	0	526.438	0.5625
4.0957	0	530	0	530	0	525	0	525	0	530	0	525	0	530	0	528	0	525	0	525	0	525	0	525	0	525	0	525	0	525	0	525	0	0	526.438	0.5625
4.1068	0	530	0	530	0	525	0	525	0	530	0	525	0	530	0	528	0	525	0	525	0	525	0	525	0	525	0	525	0	525	0	525	0	0	526.438	0.5625
4.118	0	530	0	530	0	525	0	525	0	530	0	525	0	530	0	528	0	525	0	525	0	525	0	525	0	525	0	525	0	525	0	525	0	0	526.438	0.5625
4.1291	0	530	0	530	0	525	0	525	0	530	0	525	0	530	0	528	0	525	0	525	0	525	0	525	0	525	0	525	0	525	0	525	0	0	526.438	0.5625
4.1403	0	530	0	530	0	525	0	525	0	530	0	525	0	530	0	528	0	525	0	525	0	525	0	525	0	525	0	525	0	525	0	525	0	0	526.438	0.5625
4.1515	0	530	0	530	0	525	0	525	0	530	0	525	0	530	0	528	0	525	0	525	0	525	0	525	0	525	0	525	0	525	0	525	0	0	526.438	0.5625
4.1626	0	530	0	530	0	525	0	525	0	530	0	525	0	530	0	528	0	525	0	525	0	525	0	525	0	525	0	525	0	525	0	525	0	0	526.438	0.5625
4.1738	0	530	0	530	0	525	0	525	0	530	0	525	0	530	0	528	0	525	0	525	0	525	0	525	0	525	0	525	0	525	0	525	0	0	526.438	0.5625
4.1849	0	530	0	530	0	525	0	525	0	530	0	525	0	530	0	528	0	525	0	525	0	525	0	525	0	525	0	525	0	525	0	525	0	0	526.438	0.5625
4.1961	0	530	0	530	0	525	0	525	0	530	0	525	0	530	0	528	0	525	0	525	0	525	0	525	0	525	0	525	0	525	0	525	0	0	526.438	0.5625
4.2072	0	530	0	530	0	525	0	525	0	530	0	525	0	530	0	528	0	525	0	525	0	525	0	525	0	525	0	525	0	525	0	525	0	0	526.438	0.5625
4.2184	0	530	0	530	0	525	0	525	0	530	0	525	0	530	0	528	0	525	0	525	0	525	0	525	0	525	0	525	0	525	0	525	0	0	526.438	0.5625
4.2296	0	530	0	530	0	525	0	525	0	530	0	525	0	530	0	528	0	525	0	525	0	525	0	525	0	525	0	525	0	525	0	525	0	0	526.438	0.5625
4.2407	0	530	0	530	0	525	0	525	0	530	0	525	0	530	0	528	0	525	0	525	0	525	0	525	0	525	0	525	0	525	0	525	0	0	526.438	0.5625
4.2519	0	530	0	530	0	525	0	525	0	530	0	525	0	530	0	528	0	525	0	525	0	525	0	525	0	525	0	525	0	525	0	525	0	0	526.438	0.5625
4.263	0	530	0	530	0	525	0	525	0	530	0	525	0	530	0	528	0	525	0	525	0	525	0	525	0	525	0	525	0	525	0	525	0	0	526.438	0.5625
4.2742	0	530	0	530	0	525	0	525	0	530	0	525	0	530	0	528	0	525	0	525	0	525	0	525	0	525	0	525	0	525	0	525	0	0	526.438	0.5625
4.2854	0	530	0	530	0	525	0	525	0	530	0	525	0	530	0	528	0	525	0	525	0	525	0	525	0	525	0	525	0	525	0	525	0	0	526.438	0.5625
4.2965	0	530	0	530	0	525	0	525	0	530	0	525	0	530	0	528	0	525	0	525	0	525	0	525	0	525	0	525	0	525	0	525	0	0	526.438	0.5625
4.3077	0	530	0	530	0	525	0	525	0	530	0	525	0	530	0	528	0	525	0	525	0	525	0	525	0	525	0	525	0	525	0	525	0	0	526.438	0.5625
4.3188	0	530	0	530	0	525	0	525	0	530	0	525	0	530	0	528	0	525	0	525	0	525	0	525	0	525	0	525	0	525	0	525	0	0	526.438	0.5625
4.33	0	530	0	530	0	525	0	525	0	530	0	525	0	530	0	528	0	525	0	525	0	525	0	525	0	525	0	525	0	525	0	525	0	0	526.438	0.5625
4.3412	0	530	0	530	0	525	0	525	0	530	0	525	0	530	0	528	0	525	0	525	0	525	0	525	0	525	0	525	0	525	0	525	0	0	526.438	0.5625
4.3523	0	530	0	530	0	525	0	525	0	530	0	525	0	530	0	528	0	525	0	525	0	525	0	525	0	525	0	525	0	525	0	525	0	0	526.438	0.5625
4.3635	0	530	0	530	0	525	0	525	0	530	0	525	0	530	0	528	0	525	0	525	0	525	0	525	0	525	0	525	0	525	0	525	0	0	526.438	0.5625
4.3746	0	530	0	530	0	525	0	525	0	530	0	525	0	530	0	528	0	525	0	525	0	525	0	525	0	525	0	525	0	525	0	525	0	0	526.438	0.5625
4.3858	0	530	0	530	0	525	0	525	0	530	0	525	0	530	0	528	0	525	0	525	0	525	0	525	0	525	0	525	0	525	0	525	0	0	526.438	0.5625
4.397	0	530	0	530	0	525	0	525	0	530	0	525	0	530	0	528	0	525	0	525	0	525	0	525	0	525	0	525	0	525	0	525	0	0	526.438	0.5625
4.4081	0	530	0	530	0	525	0	525	0	530	0	525	0	530	0	528	0	525	0	525	0	525	0	525	0	525	0	525	0	525	0	525	0	0	526.438	0.5625
4.4193	0	530	0	530	0	525	0	525	0	530	0	525	0	530	0	528	0	525	0	525	0	525	0	525	0	525	0	525	0	525	0	525	0	0	526.438	0.5625
4.4304	0	530	0	530	0	525	0	525	0	530	0	525	0	530	0	528	0	525	0	525	0	525	0	525	0	525	0	525	0	525	0	525	0	0	526.438	0.5625
4.4416	0	530	0	530	0	525	0	525	0	530	0	525	0	530	0	528	0	525	0	525	0	525	0	525	0	525	0	525	0	525	0	525	0	0	526.438	0.5625
4.4528	0	530	0	530	0	525	0	525	0	530	0	525	0	530	0	528	0	525	0	525	0	525	0	525	0	525	0	525	0	525	0	525	0	0	526.438	0.5625
4.4639	0	530	0	530	0	525	0	525	0	530	0	525	0	530	0	528	0	525	0	525	0	525	0	525	0	525	0	525	0	525	0	525	0	0	526.438	0.5625
4.4751	0	530	0	530	0	525	0	525	0	530	0	525	0	530	0	528	0	525	0	525	0	525	0	525	0	525	0	525	0	525	0	525	0	0	526.438	0.5625
4.4862	0	530	0	530	0	525	0	525	0	530	0	525	0	530	0	528	0	525	0	525	0	525	0	525	0	525	0	525	0	525	0	525	0	0	526.438	0.5625
4.4974	0	530	0	530	0	525	0	525	0	530	0	525	0	530	0	528	0	525	0	525	0	525	0	525	0	525	0	525	0	525	0	525	0	0	526.438	0.5625
4.5086	0	530	0	530	0	525	0	525	0	530	0	525	0	530	0	528	0	525	0	525	0	525	0	525	0	525	0	525	0	525	0	525	0	0	526.438	0.5625
4.5197	0	530	0	530	0	525	0	525	0	530	0	525	0	530	0	528	0	525	0	525	0	525	0	525	0	525	0	525	0	525	0	525	0	0	526.438	0.5625
4.5309	0	530	0	530	0	525	0	525	0	530	0	525	0	530	0	528	0	525	0	525	0	525	0	525	0	525	0	525	0	525	0	525	0	0	526.438	0.5625
4.542	0	530	0	530	0	525	0	525	0	530	0	525	0	530	0	528	0	525	0	525	0	525	0	525	0	525	0	525	0	525	0	525	0	0	526.438	0.5625
4.5532	0	530	0	530	0	525	0	525	0	530	0	525	0	530	0	528	0	525	0	525	0	525	0	525	0	525	0	525	0	525	0	525	0	0	526.438	0.5625
4.5644	0	530	0	530	0	525	0	525	0	530	0	525	0	530	0	528	0	525	0	525	0	525	0	525	0	525	0	525	0	525	0	525	0	0	526.438	0.5625
4.5755	0	530	0	530	0	525	0	525	0	530	0	525	0	530	0	528	0	525	0	525	0	525	0	525	0	525	0	525	0	525	0	525	0	0	526.438	0.5625
4.5867	0	530	0	530	0	525	0	525	0	530	0	525	0	530	0	528	0	525	0	525	0	525	0	525	0	525	0	525	0	525	0	525	0	0	526.438	0.5625
4.5978	0	530	0	530	0	525	0	525	0	530	0	525	0	530	0	528	0	525	0	525	0	525	0	525	0	525	0	525	0	525	0	525	0	0	526.438	0.5625
4.609	0	530	0	530	0	525	0	525	0	530	0	525	0	530	0	528	0	525	0	525	0	525	0	525	0	525	0	525	0	525	0	525	0	0	526.438	0.5625
4.6202	0	530	0	530	0	525	0	525	0	530	0	525	0	530	0	528	0	525	0	525	0	525	0	525	0	525	0	525	0	525	0	525	0	0	526.438	0.5625
4.6313	0	530	0	530	0	525	0	525	0	530	0	525	0	530	0	528	0	525	0	525	0	525	0	525	0	525	0	525	0	525	0	525	0	0	526.438	0.5625
4.6425	0	530	0	530	0	525	0	525	0	530	0	525	0	530	0	528	0	525	0	525	0	525	0	525	0	525	0	525	0	525	0	525	0	0	526.438	0.5625
4.6536	0	530	0	530	0	525	0	525	0	530	0	525	0	530	0	528	0	525	0	525	0	525	0	525	0	525	0	525	0	525	0	525	0	0	526.438	0.5625
4.6648	0	530	0	530	0	525	0	525	0	530	0	525	0	530	0	528	0	525	0	525	0	525	0	525	0	525	0	525	0	525	0	525	0	0	526.438	0.5625
4.676	0	530	0	530	0	525	0	525	0	530	0	525	0	530	0	528	0	525	0	525	0	525	0	525	0	525	0	525	0	525	0	525	0	0	526.438	0.5625
4.6871	0	530	0	530	0	525	0	525	0	530	0	525	0	530	0	528	0	525	0	525	0	525	0	525	0	525	0	525	0	525	0	525	0	0	526.438	0.5625
4.6983	0	530	0	530	0	525	0	525	0	530	0	525	0	530	0	528	0	525	0	525	0	525	0	525	0	525	0	525	0	525	0	525	0	0	526.438	0.5625
4.7094	0	530	0	530	0	525	0	525	0	530	0	525	0	530	0	528	0	525	0	525	0	525	0	525	0	525	0	525	0	525	0	525	0	0	526.438	0.5625
4.7206	0	530	0	530	0	525	0	525	0	530	0	525	0	530	0	528	0	525	0	525	0	525	0	525	0	525	0	525	0	525	0	525	0	0	526.438	0.5625
4.7318	0	530	0	530	0	525	0	525	0	530	0	525	0	530	0	528	0	525	0	525	0	525	0	525	0	525	0	525	0	525	0	525	0	0	526.438	0.5625
4.7429	0	530	0	530	0	525	0	525	0	530	0	525	0	530	0	528	0	525	0	525	0	525	0	525	0	525	0	525	0	525	0	525	0	0	526.438	0.5625
4.7541	0	530	0	530	0	525	0	525	0	530	0	525	0	530	0	528	0	525	0	525	0	525	0	525	0	525	0	525	0	525	0	525	0	0	526.438	0.5625
4.7652	0	530	0	530	0	525	0	525	0	530	0	525	0	530	0	528	0	525	0	525	0	525	0	525	0	525	0	525	0	525	0	525	0	0	526.438	0.5625
4.7764	0	530	0	530	0	525	0	525	0	530	0	525	0	530	0	528	0	525	0	525	0	525	0	525	0	525	0	525	0	525	0	525	0	0	526.438	0.5625
4.7876	0	530	0	530	0	525	0	525	0	530	0	525	0	530	0	528	0	525	0	525	0	525	0	525	0	525	0	525	0	525	0	525	0	0	526.438	0.5625
4.7987	0	530	0	530	0	525	0	525	0	530	0	525	0	530	0	528	0	525	0	525	0	525	0	525	0	525	0	525	0	525	0	525	0	0	526.438	0.5625
4.8099	0	530	0	530	0	525	0	525	0	530	0	525	0	530	0	528	0	525	0	525	0	525	0	525	0	525	0	525	0	525	0	525	0	0	526.438	0.5625
4.821	0	530	0	530	0	525	0	525	0	530	0	525	0	530	0	528	0	525	0	525	0	525	0	525	0	525	0	525	0	525	0	525	0	0	526.438	0.5625
4.8322	0	530	0	530	0	525	0	525	0	530	0	525	0	530	0	528	0	525	0	525	0	525	0	525	0	525	0	525	0	525	0	525	0	0	526.438	0.5625
4.8434	0	530	0	530	0	525	0	525	0	530	0	525	0	530	0	528	0	525	0	525	0	525	0	525	0	525	0	525	0	525	0	525	0	0	526.438	0.5625
4.8545	0	530	0	530	0	525	0	525	0	530	0	525	0	530	0	528	0	525	0	525	0	525	0	525	0	525	0	525	0	525	0	525	0	0	526.438	0.5625
4.8657	0	530	0	530	0	525	0	525	0	530	0	525	0	530	0	528	0	525	0	525	0	525	0	525	0	525	0	525	0	525	0	525	0	0	526.438	0.5625
4.8768	0	530	0	530	0	525	0	525	0	530	0	525	0	530	0	528	0	525	0	525	0	525	0	525	0	525	0	525	0	525	0	525	0	0	526.438	0.5625
4.888	0	530	0	530	0	525	0	525	0	530	0	525	0	530	0	528	0	525	0	525	0	525	0	525	0	525	0	525	0	525	0	525	0	0	526.438	0.5625
4.8992	0	530	0	530	0	525	0	525	0	530	0	525	0	530	0	528	0	525	0	525	0	525	0	525	0	525	0	525	0	525	0	525	0	0	526.438	0.5625
4.9103	0	530	0	530	0	525	0	525	0	530	0	525	0	530	0	528	0	525	0	525	0	525	0	525	0	525	0	525	0	525	0	525	0	0	526.438	0.5625
4.9215	0	530	0	530	0	525	0	525	0	530	0	525	0	530	0	528	0	525	0	525	0	525	0	525	0	525	0	525	0	525	0	525	0	0	526.438	0.5625
4.9326	0	530	0	530	0	525	0	525	0	530	0	525	0	530	0	528	0	525	0	525	0	525	0	525	0	525	0	525	0	525	0	525	0	0	526.438	0.5625
4.9438	0	530	0	530	0	525	0	525	0	530	0	525	0	530	0	528	0	525	0	525	0	525	0	525	0	525	0	525	0	525	0	525	0	0	526.438	0.5625
4.955	0	530	0	530	0	525	0	525	0	530	0	525	0	530	0	528	0	525	0	525	0	525	0	525	0	525	0	525	0	525	0	525	0	0	526.438	0.5625
4.9661	0	530	0	530	0	525	0	525	0	530	0	525	0	530	0	528	0	525	0	525	0	525	0	525	0	525	0	525	0	525	0	525	0	0	526.438	0.5625
4.9773	0	530	0	530	0	525	0	525	0	530	0	525	0	530	0	528	0	525	0	525	0	525	0	525	0	525	0	525	0	525	0	525	0	0	526.438	0.5625
4.9884	0	530	0	530	0	525	0	525	0	530	0	525	0	530	0	528	0	525	0	525	0	525	0	525	0	525	0	525	0	525	0	525	0	0	526.438	0.5625
4.9996	0	530	0	530	0	525	0	525	0	530	0	525	0	530	0	528	0	525	0	525	0	525	0	525	0	525	0	525	0	525	0	525	0	0	526.438	0.5625
5.0108	0	530	0	530	0	525	0	525	0	530	0	525	0	530	0	528	0	525	0	525	0	525	0	525	0	525	0	525	0	525	0	525	0	0	526.438	0.5625
5.0219	0	530	0	530	0	525	0	525	0	530	0	525	0	530	0	528	0	525	0	525	0	525	0	525	0	525	0	525	0	525	0	525	0	0	526.438	0.5625
5.0331	0	530	0	530	0	525	0	525	0	530	0	525	0	530	0	528	0	525	0	525	0	525	0	525	0	525	0	525	0	525	0	525	0	0	526.438	0.5625
5.0442	0	530	0	530	0	525	0	525	0	530	0	525	0	530	0	528	0	525	0	525	0	525	0	525	0	525	0	525	0	525	0	525	0	0	526.438	0.5625
5.0554	0	530	0	530	0	525	0	525	0	530	0	525	0	530	0	528	0	525	0	525	0	525	0	525	0	525	0	525	0	525	0	525	0	0	526.438	0.5625
5.0666	0	530	0	530	0	525	0	525	0	530	0	525	0	530	0	528	0	525	0	525	0	525	0	525	0	525	0	525	0	525	0	525	0	0	526.438	0.5625
5.0777	0	530	0	530	0	525	0	525	0	530	0	525	0	530	0	528	0	525	0	525	0	525	0	525	0	525	0	525	0	525	0	525	0	0	526.438	0.5625
5.0889	0	530	0	530	0	525	0	525	0	530	0	525	0	530	0	528	0	525	0	525	0	525	0	525	0	525	0	525	0	525	0	525	0	0	526.438	0.5625
5.1	0	530	0	530	0	525	0	525	0	530	0	525	0	530	0	528	0	525	0	525	0	525	0	525	0	525	0	525	0	525	0	525	0	0	526.438	0.5625
5.1112	0	530	0	530	0	525	0	525	0	530	0	525	0	530	0	528	0	525	0	525	0	525	0	525	0	525	0	525	0	525	0	525	0	0	526.438	0.5625
5.1224	0	530	0	530	0	525	0	525	0	530	0	525	0	530	0	528	0	525	0	525	0	525	0	525	0	525	0	525	0	525	0	525	0	0	526.438	0.5625
5.1335	0	530	0	530	0	525	0	525	0	530	0	525	0	530	0	528	0	525	0	525	0	525	0	525	0	525	0	525	0	525	0	525	0	0	526.438	0.5625
5.1447	0	530	0	530	0	525	0	525	0	530	0	525	0	530	0	528	0	525	0	525	0	525	0	525	0	525	0	525	0	525	0	525	0	0	526.438	0.5625
5.1558	0	530	0	530	0	525	0	525	0	530	0	525	0	530	0	528	0	525	0	525	0	525	0	525	0	525	0	525	0	525	0	525	0	0	526.438	0.5625
5.167	0	530	0	530	0	525	0	525	0	530	0	525	0	530	0	528	0	525	0	525	0	525	0	525	0	525	0	525	0	525	0	525	0	0	526.438	0.5625
5.1782	0	530	0	530	0	525	0	525	0	530	0	525	0	530	0	528	0	525	0	525	0	525	0	525	0	525	0	525	0	525	0	525	0	0	526.438	0.5625
5.1893	0	530	0	530	0	525	0	525	0	530	0	525	0	530	0	528	0	525	0	525	0	525	0	525	0	525	0	525	0	525	0	525	0	0	526.438	0.5625
5.2005	0	530	0	530	0	525	0	525	0	530	0	525	0	530	0	528	0	525	0	525	0	525	0	525	0	525	0	525	0	525	0	525	0	0	526.438	0.5625
5.2116	0	530	0	530	0	525	0	525	0	530	0	525	0	530	0	528	0	525	0	525	0	525	0	525	0	525	0	525	0	525	0	525	0	0	526.438	0.5625
5.2228	0	530	0	530	0	525	0	525	0	530	0	525	0	530	0	528	0	525	0	525	0	525	0	525	0	525	0	525	0	525	0	525	0	0	526.438	0.5625
5.234	0	530	0	530	0	525	0	525	0	530	0	525	0	530	0	528	0	525	0	525	0	525	0	525	0	525	0	525	0	525	0	525	0	0	526.438	0.5625
5.2451	0	530	0	530	0	525	0	525	0	530	0	525	0	530	0	528	0	525	0	525	0	525	0	525	0	525	0	525	0	525	0	525	0	0	526.438	0.5625
5.2563	0	530	0	530	0	525	0	525	0	530	0	525	0	530	0	528	0	525	0	525	0	525	0	525	0	525	0	525	0	525	0	525	0	0	526.438	0.5625
5.2674	0	530	0	530	0	525	0	525	0	530	0	525	0	530	0	528	0	525	0	525	0	525	0	525	0	525	0	525	0	525	0	525	0	0	526.438	0.5625
5.2786	0	530	0	530	0	525	0	525	0	530	0	525	0	530	0	528	0	525	0	525	0	525	0	525	0	525	0	525	0	525	0	525	0	0	526.438	0.5625
5.2898	0	530	0	530	0	525	0	525	0	530	0	525	0	530	0	528	0	525	0	525	0	525	0	525	0	525	0	525	0	525	0	525	0	0	526.438	0.5625
5.3009	0	530	0	530	0	525	0	525	0	530	0	525	0	530	0	528	0	525	0	525	0	525	0	525	0	525	0	525	0	525	0	525	0	0	526.438	0.5625
5.3121	0	530	0	530	0	525	0	525	0	530	0	525	0	530	0	528	0	525	0	525	0	525	0	525	0	525	0	525	0	525	0	525	0	0	526.438	0.5625
5.3232	0	530	0	530	0	525	0	525	0	530	0	525	0	530	0	528	0	525	0	525	0	525	0	525	0	525	0	525	0	525	0	525	0	0	526.438	0.5625
5.3344	0	530	0	530	0	525	0	525	0	530	0	525	0	530	0	528	0	525	0	525	0	525	0	525	0	525	0	525	0	525	0	525	0	0	526.438	0.5625
5.3456	0	530	0	530	0	525	0	525	0	530	0	525	0	530	0	528	0	525	0	525	0	525	0	525	0	525	0	525	0	525	0	525	0	0	526.438	0.5625
5.3567	0	530	0	530	0	525	0	525	0	530	0	525	0	530	0	528	0	525	0	525	0	525	0	525	0	525	0	525	0	525	0	525	0	0	526.438	0.5625
5.3679	0	530	0	530	0	525	0	525	0	530	0	525	0	530	0	528	0	525	0	525	0	525	0	525	0	525	0	525	0	525	0	525	0	0	526.438	0.5625
5.379	0	530	0	530	0	525	0	525	0	530	0	525	0	530	0	528	0	525	0	525	0	525	0	525	0	525	0	525	0	525	0	525	0	0	526.438	0.5625
5.3902	0	530	0	530	0	525	0	525	0	530	0	525	0	530	0	528	0	525	0	525	0	525	0	525	0	525	0	525	0	525	0	525	0	0	526.438	0.5625
5.4013	0	530	0	530	0	525	0	525	0	530	0	525	0	530	0	528	0	525	0	525	0	525	0	525	0	525	0	525	0	525	0	525	0	0	526.438	0.5625
5.4125	0	530	0	530	0	525	0	525	0	530	0	525	0	530	0	528	0	525	0	525	0	525	0	525	0	525	0	525	0	525	0	525	0	0	526.438	0.5625
5.4237	0	530	0	530	0	525	0	525	0	530	0	525	0	530	0	528	0	525	0	525	0	525	0	525	0	525	0	525	0	525	0	525	0	0	526.438	0.5625
5.4348	0	530	0	530	0	525	0	525	0	530	0	525	0	530	0	528	0	525	0	525	0	525	0	525	0	525	0	525	0	525	0	525	0	0	526.438	0.5625
5.446	0	530	0	530	0	525	0	525	0	530	0	525	0	530	0	528	0	525	0	525	0	525	0	525	0	525	0	525	0	525	0	525	0	0	526.438	0.5625
5.4571	0	530	0	530	0	525	0	525	0	530	0	525	0	530	0	528	0	525	0	525	0	525	0	525	0	525	0	525	0	525	0	525	0	0	526.438	0.5625
5.4683	0	530	0	530	0	525	0	525	0	530	0	525	0	530	0	528	0	525	0	525	0	525	0	525	0	525	0	525	0	525	0	525	0	0	526.438	0.5625
5.4795	0	530	0	530	0	525	0	525	0	530	0	525	0	530	0	528	0	525	0	525	0	525	0	525	0	525	0	525	0	525	0	525	0	0	526.438	0.5625
5.4906	0	530	0	530	0	525	0	525	0	530	0	525	0	530	0	528	0	525	0	525	0	525	0	525	0	525	0	525	0	525	0	525	0	0	526.438	0.5625
5.5018	0	530	0	530	0	525	0	525	0	530	0	525	0	530	0	528	0	525	0	525	0	525	0	525	0	525	0	525	0	525	0	525	0	0	526.438	0.5625
5.5129	0	530	0	530	0	525	0	525	0	530	0	525	0	530	0	528	0	525	0	525	0	525	0	525	0	525	0	525	0	525	0	525	0	0	526.438	0.5625
5.5241	0	530	0	530	0	525	0	525	0	530	0	525	0	530	0	528	0	525	0	525	0	525	0	525	0	525	0	525	0	525	0	525	0	0	526.438	0.5625
5.5353	0	530	0	530	0	525	0	525	0	530	0	525	0	530	0	528	0	525	0	525	0	525	0	525	0	525	0	525	0	525	0	525	0	0	526.438	0.5625
5.5464	0	530	0	530	0	525	0	525	0	530	0	525	0	530	0	528	0	525	0	525	0	525	0	525	0	525	0	525	0	525	0	525	0	0	526.438	0.5625
5.5576	0	530	0	530	0	525	0	525	0	530	0	525	0	530	0	528	0	525	0	525	0	525	0	525	0	525	0	525	0	525	0	525	0	0	526.438	0.5625
5.5687	0	530	0	530	0	525	0	525	0	530	0	525	0	530	0	528	0	525	0	525	0	525	0	525	0	525	0	525	0	525	0	525	0	0	526.438	0.5625
5.5799	0	530	0	530	0	525	0	525	0	530	0	525	0	530	0	528	0	525	0	525	0	525	0	525	0	525	0	525	0	525	0	525	0	0	526.438	0.5625
5.5911	0	530	0	530	0	525	0	525	0	530	0	525	0	530	0	528	0	525	0	525	0	525	0	525	0	525	0	525	0	525	0	525	0	0	526.438	0.5625
5.6022	0	530	0	530	0	525	0	525	0	530	0	525	0	530	0	528	0	525	0	525	0	525	0	525	0	525	0	525	0	525	0	525	0	0	526.438	0.5625
5.6134	0	530	0	530	0	525	0	525	0	530	0	525	0	530	0	528	0	525	0	525	0	525	0	525	0	525	0	525	0	525	0	525	0	0	526.438	0.5625
5.6245	0	530	0	530	0	525	0	525	0	530	0	525	0	530	0	528	0	525	0	525	0	525	0	525	0	525	0	525	0	525	0	525	0	0	526.438	0.5625
5.6357	0	530	0	530	0	525	0	525	0	530	0	525	0	530	0	528	0	525	0	525	0	525	0	525	0	525	0	525	0	525	0	525	0	0	526.438	0.5625
5.6469	0	530	0	530	0	525	0	525	0	530	0	525	0	530	0	528	0	525	0	525	0	525	0	525	0	525	0	525	0	525	0	525	0	0	526.438	0.5625
5.658	0	530	0	530	0	525	0	525	0	530	0	525	0	530	0	528	0	525	0	525	0	525	0	525	0	525	0	525	0	525	0	525	0	0	526.438	0.5625
5.6692	0	530	0	530	0	525	0	525	0	530	0	525	0	530	0	528	0	525	0	525	0	525	0	525	0	525	0	525	0	525	0	525	0	0	526.438	0.5625
5.6803	0	530	0	530	0	525	0	525	0	530	0	525	0	530	0	528	0	525	0	525	0	525	0	525	0	525	0	525	0	525	0	525	0	0	526.438	0.5625
5.6915	0	530	0	530	0	525	0	525	0	530	0	525	0	530	0	528	0	525	0	525	0	525	0	525	0	525	0	525	0	525	0	525	0	0	526.438	0.5625
5.7027	0	530	0	530	0	525	0	525	0	530	0	525	0	530	0	528	0	525	0	525	0	525	0	525	0	525	0	525	0	525	0	525	0	0	526.438	0.5625
5.7138	0	530	0	530	0	525	0	525	0	530	0	525	0	530	0	528	0	525	0	525	0	525	0	525	0	525	0	525	0	525	0	525	0	0	526.438	0.5625
5.725	0	530	0	530	0	525	0	525	0	530	0	525	0	530	0	528	0	525	0	525	0	525	0	525	0	525	0	525	0	525	0	525	0	0	526.438	0.5625
5.7361	0	530	0	530	0	525	0	525	0	530	0	525	0	530	0	528	0	525	0	525	0	525	0	525	0	525	0	525	0	525	0	525	0	0	526.438	0.5625
5.7473	0	530	0	530	0	525	0	525	0	530	0	525	0	530	0	528	0	525	0	525	0	525	0	525	0	525	0	525	0	525	0	525	0	0	526.438	0.5625
5.7585	0	530	0	530	0	525	0	525	0	530	0	525	0	530	0	528	0	525	0	525	0	525	0	525	0	525	0	525	0	525	0	525	0	0	526.438	0.5625
5.7696	0	530	0	530	0	525	0	525	0	530	0	525	0	530	0	528	0	525	0	525	0	525	0	525	0	525	0	525	0	525	0	525	0	0	526.438	0.5625
5.7808	0	530	0	530	0	525	0	525	0	530	0	525	0	530	0	528	0	525	0	525	0	525	0	525	0	525	0	525	0	525	0	525	0	0	526.438	0.5625
5.7919	0	530	0	530	0	525	0	525	0	530	0	525	0	530	0	528	0	525	0	525	0	525	0	525	0	525	0	525	0	525	0	525	0	0	526.438	0.5625
5.8031	0	530	0	530	0	525	0	525	0	530	0	525	0	530	0	528	0	525	0	525	0	525	0	525	0	525	0	525	0	525	0	525	0	0	526.438	0.5625
5.8143	0	530	0	530	0	525	0	525	0	530	0	525	0	530	0	528	0	525	0	525	0	525	0	525	0	525	0	525	0	525	0	525	0	0	526.438	0.5625
5.8254	0	530	0	530	0	525	0	525	0	530	0	525	0	530	0	528	0	525	0	525	0	525	0	525	0	525	0	525	0	525	0	525	0	0	526.438	0.5625
5.8366	0	530	0	530	0	525	0	525	0	530	0	525	0	530	0	528	0	525	0	525	0	525	0	525	0	525	0	525	0	525	0	525	0	0	526.438	0.5625
5.8477	0	530	0	530	0	525	0	525	0	530	0	525	0	530	0	528	0	525	0	525	0	525	0	525	0	525	0	525	0	525	0	525	0	0	526.438	0.5625
5.8589	0	530	0	530	0	525	0	525	0	530	0	525	0	530	0	528	0	525	0	525	0	525	0	525	0	525	0	525	0	525	0	525	0	0	526.438	0.5625
5.8701	0	530	0	530	0	525	0	525	0	530	0	525	0	530	0	528	0	525	0	525	0	525	0	525	0	525	0	525	0	525	0	525	0	0	526.438	0.5625
5.8812	0	530	0	530	0	525	0	525	0	530	0	525	0	530	0	528	0	525	0	525	0	525	0	525	0	525	0	525	0	525	0	525	0	0	526.438	0.5625
5.8924	0	530	0	530	0	525	0	525	0	530	0	525	0	530	0	528	0	525	0	525	0	525	0	525	0	525	0	525	0	525	0	525	0	0	526.438	0.5625
5.9035	0	530	0	530	0	525	0	525	0	530	0	525	0	530	0	528	0	525	0	525	0	525	0	525	0	525	0	525	0	525	0	525	0	0	526.438	0.5625
5.9147	0	530	0	530	0	525	0	525	0	530	0	525	0	530	0	528	0	525	0	525	0	525	0	525	0	525	0	525	0	525	0	525	0	0	526.438	0.5625
5.9259	0	530	0	530	0	525	0	525	0	530	0	525	0	530	0	528	0	525	0	525	0	525	0	525	0	525	0	525	0	525	0	525	0	0	526.438	0.5625
5.937	0	530	0	530	0	525	0	525	0	530	0	525	0	530	0	528	0	525	0	525	0	525	0	525	0	525	0	525	0	525	0	525	0	0	526.438	0.5625
5.9482	0	530	0	530	0	525	0	525	0	530	0	525	0	530	0	528	0	525	0	525	0	525	0	525	0	525	0	525	0	525	0	525	0	0	526.438	0.5625
5.9593	0	530	0	530	0	525	0	525	0	530	0	525	0	530	0	528	0	525	0	525	0	525	0	525	0	525	0	525	0	525	0	525	0	0	526.438	0.5625
5.9705	0	530	0	530	0	525	0	525	0	530	0	525	0	530	0	528	0	525	0	525	0	525	0	525	0	525	0	525	0	525	0	525	0	0	526.438	0.5625
5.9817	0	530	0	530	0	525	0	525	0	530	0	525	0	530	0	528	0	525	0	525	0	525	0	525	0	525	0	525	0	525	0	525	0	0	526.438	0.5625
5.9928	0	530	0	530	0	525	0	525	0	530	0	525	0	530	0	528	0	525	0	525	0	525	0	525	0	525	0	525	0	525	0	525	0	0	526.438	0.5625
6.004	0	530	0	530	0	525	0	525	0	530	0	525	0	530	0	528	0	525	0	525	0	525	0	525	0	525	0	525	0	525	0	525	0	0	526.438	0.5625
6.0151	0	530	0	530	0	525	0	525	0	530	0	525	0	530	0	528	0	525	0	525	0	525	0	525	0	525	0	525	0	525	0	525	0	0	526.438	0.5625
6.0263	0	530	0	530	0	525	0	525	0	530	0	525	0	530	0	528	0	525	0	525	0	525	0	525	0	525	0	525	0	525	0	525	0	0	526.438	0.5625
6.0375	0	530	0	530	0	525	0	525	0	530	0	525	0	530	0	528	0	525	0	525	0	525	0	525	0	525	0	525	0	525	0	525	0	0	526.438	0.5625
6.0486	0	530	0	530	0	525	0	525	0	530	0	525	0	530	0	528	0	525	0	525	0	525	0	525	0	525	0	525	0	525	0	525	0	0	526.438	0.5625
6.0598	0	530	0	530	0	525	0	525	0	530	0	525	0	530	0	528	0	525	0	525	0	525	0	525	0	525	0	525	0	525	0	525	0	0	526.438	0.5625
6.0709	0	530	0	530	0	525	0	525	0	530	0	525	0	530	0	528	0	525	0	525	0	525	0	525	0	525	0	525	0	525	0	525	0	0	526.438	0.5625
6.0821	0	530	0	530	0	525	0	525	0	530	0	525	0	530	0	528	0	525	0	525	0	525	0	525	0	525	0	525	0	525	0	525	0	0	526.438	0.5625
6.0933	0	530	0	530	0	525	0	525	0	530	0	525	0	530	0	528	0	525	0	525	0	525	0	525	0	525	0	525	0	525	0	525	0	0	526.438	0.5625
6.1044	0	530	0	530	0	525	0	525	0	530	0	525	0	530	0	528	0	525	0	525	0	525	0	525	0	525	0	525	0	525	0	525	0	0	526.438	0.5625
6.1156	0	530	0	530	0	525	0	525	0	530	0	525	0	530	0	528	0	525	0	525	0	525	0	525	0	525	0	525	0	525	0	525	0	0	526.438	0.5625
6.1267	0	530	0	530	0	525	0	525	0	530	0	525	0	530	0	528	0	525	0	525	0	525	0	525	0	525	0	525	0	525	0	525	0	0	526.438	0.5625
6.1379	0	530	0	530	0	525	0	525	0	530	0	525	0	530	0	528	0	525	0	525	0	525	0	525	0	525	0	525	0	525	0	525	0	0	526.438	0.5625
6.1491	0	530	0	530	0	525	0	525	0	530	0	525	0	530	0	528	0	525	0	525	0	525	0	525	0	525	0	525	0	525	0	525	0	0	526.438	0.5625
6.1602	0	530	0	530	0	525	0	525	0	530	0	525	0	530	0	528	0	525	0	525	0	525	0	525	0	525	0	525	0	525	0	525	0	0	526.438	0.5625
6.1714	0	530	0	530	0	525	0	525	0	530	0	525	0	530	0	528	0	525	0	525	0	525	0	525	0	525	0	525	0	525	0	525	0	0	526.438	0.5625
6.1825	0	530	0	530	0	525	0	525	0	530	0	525	0	530	0	528	0	525	0	525	0	525	0	525	0	525	0	525	0	525	0	525	0	0	526.438	0.5625
6.1937	0	530	0	530	0	525	0	525	0	530	0	525	0	530	0	528	0	525	0	525	0	525	0	525	0	525	0	525	0	525	0	525	0	0	526.438	0.5625
6.2049	0	530	0	530	0	525	0	525	0	530	0	525	0	530	0	528	0	525	0	525	0	525	0	525	0	525	0	525	0	525	0	525	0	0	526.438	0.5625
6.216	0	530	0	530	0	525	0	525	0	530	0	525	0	530	0	528	0	525	0	525	0	525	0	525	0	525	0	525	0	525	0	525	0	0	526.438	0.5625
6.2272	0	530	0	530	0	525	0	525	0	530	0	525	0	530	0	528	0	525	0	525	0	525	0	525	0	525	0	525	0	525	0	525	0	0	526.438	0.5625
6.2383	0	530	0	530	0	525	0	525	0	530	0	525	0	530	0	528	0	525	0	525	0	525	0	525	0	525	0	525	0	525	0	525	0	0	526.438	0.5625
6.2495	0	530	0	530	0	525	0	525	0	530	0	525	0	530	0	528	0	525	0	525	0	525	0	525	0	525	0	525	0	525	0	525	0	0	526.438	0.5625
6.2607	0	530	0	530	0	525	0	525	0	530	0	525	0	530	0	528	0	525	0	525	0	525	0	525	0	525	0	525	0	525	0	525	0	0	526.438	0.5625
6.2718	0	530	0	530	0	525	0	525	0	530	0	525	0	530	0	528	0	525	0	525	0	525	0	525	0	525	0	525	0	525	0	525	0	0	526.438	0.5625
6.283	0	530	0	530	0	525	0	525	0	530	0	525	0	530	0	528	0	525	0	525	0	525	0	525	0	525	0	525	0	525	0	525	0	0	526.438	0.5625
6.2941	0	530	0	530	0	525	0	525	0	530	0	525	0	530	0	528	0	525	0	525	0	525	0	525	0	525	0	525	0	525	0	525	0	0	526.438	0.5625
6.3053	0	530	0	530	0	525	0	525	0	530	0	525	0	530	0	528	0	525	0	525	0	525	0	525	0	525	0	525	0	525	0	525	0	0	526.438	0.5625
6.3165	0	530	0	530	0	525	0	525	0	530	0	525	0	530	0	528	0	525	0	525	0	525	0	525	0	525	0	525	0	525	0	525	0	0	526.438	0.5625
6.3276	0	530	0	530	0	525	0	525	0	530	0	525	0	530	0	528	0	525	0	525	0	525	0	525	0	525	0	525	0	525	0	525	0	0	526.438	0.5625
6.3388	0	530	0	530	0	525	0	525	0	530	0	525	0	530	0	528	0	525	0	525	0	525	0	525	0	525	0	525	0	525	0	525	0	0	526.438	0.5625
6.3499	0	530	0	530	0	525	0	525	0	530	0	525	0	530	0	528	0	525	0	525	0	525	0	525	0	525	0	525	0	525	0	525	0	0	526.438	0.5625
6.3611	0	530	0	530	0	525	0	525	0	530	0	525	0	530	0	528	0	525	0	525	0	525	0	525	0	525	0	525	0	525	0	525	0	0	526.438	0.5625
6.3723	0	530	0	530	0	525	0	525	0	530	0	525	0	530	0	528	0	525	0	525	0	525	0	525	0	525	0	525	0	525	0	525	0	0	526.438	0.5625
6.3834	0	530	0	530	0	525	0	525	0	530	0	525	0	530	0	528	0	525	0	525	0	525	0	525	0	525	0	525	0	525	0	525	0	0	526.438	0.5625
6.3946	0	530	0	530	0	525	0	525	0	530	0	525	0	530	0	528	0	525	0	525	0	525	0	525	0	525	0	525	0	525	0	525	0	0	526.438	0.5625
6.4057	0	530	0	530	0	525	0	525	0	530	0	525	0	530	0	528	0	525	0	525	0	525	0	525	0	525	0	525	0	525	0	525	0	0	526.438	0.5625
6.4169	0	530	0	530	0	525	0	525	0	530	0	525	0	530	0	528	0	525	0	525	0	525	0	525	0	525	0	525	0	525	0	525	0	0	526.438	0.5625
6.4281	0	530	0	530	0	525	0	525	0	530	0	525	0	530	0	528	0	525	0	525	0	525	0	525	0	525	0	525	0	525	0	525	0	0	526.438	0.5625
6.4392	0	530	0	530	0	525	0	525	0	530	0	525	0	530	0	528	0	525	0	525	0	525	0	525	0	525	0	525	0	525	0	525	0	0	526.438	0.5625
6.4504	0	530	0	530	0	525	0	525	0	530	0	525	0	530	0	528	0	525	0	525	0	525	0	525	0	525	0	525	0	525	0	525	0	0	526.438	0.5625
6.4615	0	530	0	530	0	525	0	525	0	530	0	525	0	530	0	528	0	525	0	525	0	525	0	525	0	525	0	525	0	525	0	525	0	0	526.438	0.5625
6.4727	0	530	0	530	0	525	0	525	0	530	0	525	0	530	0	528	0	525	0	525	0	525	0	525	0	525	0	525	0	525	0	525	0	0	526.438	0.5625
6.4839	0	530	0	530	0	525	0	525	0	530	0	525	0	530	0	528	0	525	0	525	0	525	0	525	0	525	0	525	0	525	0	525	0	0	526.438	0.5625
6.495	0	530	0	530	0	525	0	525	0	530	0	525	0	530	0	528	0	525	0	525	0	525	0	525	0	525	0	525	0	525	0	525	0	0	526.438	0.5625
6.5062	0	530	0	530	0	525	0	525	0	530	0	525	0	530	0	528	0	525	0	525	0	525	0	525	0	525	0	525	0	525	0	525	0	0	526.438	0.5625
6.5173	0	530	0	530	0	525	0	525	0	530	0	525	0	530	0	528	0	525	0	525	0	525	0	525	0	525	0	525	0	525	0	525	0	0	526.438	0.5625
6.5285	0	530	0	530	0	525	0	525	0	530	0	525	0	530	0	528	0	525	0	525	0	525	0	525	0	525	0	525	0	525	0	525	0	0	526.438	0.5625
6.5397	0	530	0	530	0	525	0	525	0	530	0	525	0	530	0	528	0	525	0	525	0	525	0	525	0	525	0	525	0	525	0	525	0	0	526.438	0.5625
6.5508	0	530	0	530	0	525	0	525	0	530	0	525	0	530	0	528	0	525	0	525	0	525	0	525	0	525	0	525	0	525	0	525	0	0	526.438	0.5625
6.562	0	530	0	530	0	525	0	525	0	530	0	525	0	530	0	528	0	525	0	525	0	525	0	525	0	525	0	525	0	525	0	525	0	0	526.438	0.5625
6.5731	0	530	0	530	0	525	0	525	0	530	0	525	0	530	0	528	0	525	0	525	0	525	0	525	0	525	0	525	0	525	0	525	0	0	526.438	0.5625
6.5843	0	530	0	530	0	525	0	525	0	530	0	525	0	530	0	528	0	525	0	525	0	525	0	525	0	525	0	525	0	525	0	525	0	0	526.438	0.5625
6.5954	0	530	0	530	0	525	0	525	0	530	0	525	0	530	0	528	0	525	0	525	0	525	0	525	0	525	0	525	0	525	0	525	0	0	526.438	0.5625
6.6066	0	530	0	530	0	525	0	525	0	530	0	525	0	530	0	528	0	525	0	525	0	525	0	525	0	525	0	525	0	525	0	525	0	0	526.438	0.5625
6.6178	0	530	0	530	0	525	0	525	0	530	0	525	0	530	0	528	0	525	0	525	0	525	0	525	0	525	0	525	0	525	0	525	0	0	526.438	0.5625
6.6289	0	530	0	530	0	525	0	525	0	530	0	525	0	530	0	528	0	525	0	525	0	525	0	525	0	525	0	525	0	525	0	525	0	0	526.438	0.5625
6.6401	0	530	0	530	0	525	0	525	0	530	0	525	0	530	0	528	0	525	0	525	0	525	0	525	0	525	0	525	0	525	0	525	0	0	526.438	0.5625
6.6512	0	530	0	530	0	525	0	525	0	530	0	525	0	530	0	528	0	525	0	525	0	525	0	525	0	525	0	525	0	525	0	525	0	0	526.438	0.5625
6.6624	0	530	0	530	0	525	0	525	0	530	0	525	0	530	0	528	0	525	0	525	0	525	0	525	0	525	0	525	0	525	0	525	0	0	526.438	0.5625
6.6736	0	530	0	530	0	525	0	525	0	530	0	525	0	530	0	528	0	525	0	525	0	525	0	525	0	525	0	525	0	525	0	525	0	0	526.438	0.5625
6.6847	0	530	0	530	0	525	0	525	0	530	0	525	0	530	0	528	0	525	0	525	0	525	0	525	0	525	0	525	0	525	0	525	0	0	526.438	0.5625
6.6959	0	530	0	530	0	525	0	525	0	530	0	525	0	530	0	528	0	525	0	525	0	525	0	525	0	525	0	525	0	525	0	525	0	0	526.438	0.5625
6.707	0	530	0	530	0	525	0	525	0	530	0	525	0	530	0	528	0	525	0	525	0	525	0	525	0	525	0	525	0	525	0	525	0	0	526.438	0.5625
6.7182	0	530	0	530	0	525	0	525	0	530	0	525	0	530	0	528	0	525	0	525	0	525	0	525	0	525	0	525	0	525	0	525	0	0	526.438	0.5625
6.7294	0	530	0	530	0	525	0	525	0	530	0	525	0	530	0	528	0	525	0	525	0	525	0	525	0	525	0	525	0	525	0	525	0	0	526.438	0.5625
6.7405	0	530	0	530	0	525	0	525	0	530	0	525	0	530	0	528	0	525	0	525	0	525	0	525	0	525	0	525	0	525	0	525	0	0	526.438	0.5625
6.7517	0	530	0	530	0	525	0	525	0	530	0	525	0	530	0	528	0	525	0	525	0	525	0	525	0	525	0	525	0	525	0	525	0	0	526.438	0.5625
6.7628	0	530	0	530	0	525	0	525	0	530	0	525	0	530	0	528	0	525	0	525	0	525	0	525	0	525	0	525	0	525	0	525	0	0	526.438	0.5625
6.774	0	530	0	530	0	525	0	525	0	530	0	525	0	530	0	528	0	525	0	525	0	525	0	525	0	525	0	525	0	525	0	525	0	0	526.438	0.5625
6.7852	0	530	0	530	0	525	0	525	0	530	0	525	0	530	0	528	0	525	0	525	0	525	0	525	0	525	0	525	0	525	0	525	0	0	526.438	0.5625
6.7963	0	530	0	530	0	525	0	525	0	530	0	525	0	530	0	528	0	525	0	525	0	525	0	525	0	525	0	525	0	525	0	525	0	0	526.438	0.5625
6.8075	0	530	0	530	0	525	0	525	0	530	0	525	0	530	0	528	0	525	0	525	0	525	0	525	0	525	0	525	0	525	0	525	0	0	526.438	0.5625
6.8186	0	530	0	530	0	525	0	525	0	530	0	525	0	530	0	528	0	525	0	525	0	525	0	525	0	525	0	525	0	525	0	525	0	0	526.438	0.5625
6.8298	0	530	0	530	0	525	0	525	0	530	0	525	0	530	0	528	0	525	0	525	0	525	0	525	0	525	0	525	0	525	0	525	0	0	526.438	0.5625
6.841	0	530	0	530	0	525	0	525	0	530	0	525	0	530	0	528	0	525	0	525	0	525	0	525	0	525	0	525	0	525	0	525	0	0	526.438	0.5625
6.8521	0	530	0	530	0	525	0	525	0	530	0	525	0	530	0	528	0	525	0	525	0	525	0	525	0	525	0	525	0	525	0	525	0	0	526.438	0.5625
6.8633	0	530	0	530	0	525	0	525	0	530	0	525	0	530	0	528	0	525	0	525	0	525	0	525	0	525	0	525	0	525	0	525	0	0	526.438	0.5625
6.8744	0	530	0	530	0	525	0	525	0	530	0	525	0	530	0	528	0	525	0	525	0	525	0	525	0	525	0	525	0	525	0	525	0	0	526.438	0.5625
6.8856	0	530	0	530	0	525	0	525	0	530	0	525	0	530	0	528	0	525	0	525	0	525	0	525	0	525	0	525	0	525	0	525	0	0	526.438	0.5625
6.8968	0	530	0	530	0	525	0	525	0	530	0	525	0	530	0	528	0	525	0	525	0	525	0	525	0	525	0	525	0	525	0	525	0	0	526.438	0.5625
6.9079	0	530	0	530	0	525	0	525	0	530	0	525	0	530	0	528	0	525	0	525	0	525	0	525	0	525	0	525	0	525	0	525	0	0	526.438	0.5625
6.9191	0	530	0	530	0	525	0	525	0	530	0	525	0	530	0	528	0	525	0	525	0	525	0	525	0	525	0	525	0	525	0	525	0	0	526.438	0.5625
6.9302	0	530	0	530	0	525	0	525	0	530	0	525	0	530	0	528	0	525	0	525	0	525	0	525	0	525	0	525	0	525	0	525	0	0	526.438	0.5625
6.9414	0	530	0	530	0	525	0	525	0	530	0	525	0	530	0	528	0	525	0	525	0	525	0	525	0	525	0	525	0	525	0	525	0	0	526.438	0.5625
6.9526	0	530	0	530	0	525	0	525	0	530	0	525	0	530	0	528	0	525	0	525	0	525	0	525	0	525	0	525	0	525	0	525	0	0	526.438	0.5625
6.9637	0	530	0	530	0	525	0	525	0	530	0	525	0	530	0	528	0	525	0	525	0	525	0	525	0	525	0	525	0	525	0	525	0	0	526.438	0.5625
6.9749	0	530	0	530	0	525	0	525	0	530	0	525	0	530	0	528	0	525	0	525	0	525	0	525	0	525	0	525	0	525	0	525	0	0	526.438	0.5625
6.986	0	530	0	530	0	525	0	525	0	530	0	525	0	530	0	528	0	525	0	525	0	525	0	525	0	525	0	525	0	525	0	525	0	0	526.438	0.5625
6.9972	0	530	0	530	0	525	0	525	0	530	0	525	0	530	0	528	0	525	0	525	0	525	0	525	0	525	0	525	0	525	0	525	0	0	526.438	0.5625
7.0084	0	530	0	530	0	525	0	525	0	530	0	525	0	530	0	528	0	525	0	525	0	525	0	525	0	525	0	525	0	525	0	525	0	0	526.438	0.5625
7.0195	0	530	0	530	0	525	0	525	0	530	0	525	0	530	0	528	0	525	0	525	0	525	0	525	0	525	0	525	0	525	0	525	0	0	526.438	0.5625
7.0307	0	530	0	530	0	525	0	525	0	530	0	525	0	530	0	528	0	525	0	525	0	525	0	525	0	525	0	525	0	525	0	525	0	0	526.438	0.5625
7.0418	0	530	0	530	0	525	0	525	0	530	0	525	0	530	0	528	0	525	0	525	0	525	0	525	0	525	0	525	0	525	0	525	0	0	526.438	0.5625
7.053	0	530	0	530	0	525	0	525	0	530	0	525	0	530	0	528	0	525	0	525	0	525	0	525	0	525	0	525	0	525	0	525	0	0	526.438	0.5625
7.0642	0	530	0	530	0	525	0	525	0	530	0	525	0	530	0	528	0	525	0	525	0	525	0	525	0	525	0	525	0	525	0	525	0	0	526.438	0.5625
7.0753	0	530	0	530	0	525	0	525	0	530	0	525	0	530	0	528	0	525	0	525	0	525	0	525	0	525	0	525	0	525	0	525	0	0	526.438	0.5625
7.0865	0	530	0	530	0	525	0	525	0	530	0	525	0	530	0	528	0	525	0	525	0	525	0	525	0	525	0	525	0	525	0	525	0	0	526.438	0.5625
7.0976	0	530	0	530	0	525	0	525	0	530	0	525	0	530	0	528	0	525	0	525	0	525	0	525	0	525	0	525	0	525	0	525	0	0	526.438	0.5625
7.1088	0	530	0	530	0	525	0	525	0	530	0	525	0	530	0	528	0	525	0	525	0	525	0	525	0	525	0	525	0	525	0	525	0	0	526.438	0.5625
7.12	0	530	0	530	0	525	0	525	0	530	0	525	0	530	0	528	0	525	0	525	0	525	0	525	0	525	0	525	0	525	0	525	0	0	526.438	0.5625
7.1311	0	530	0	530	0	525	0	525	0	530	0	525	0	530	0	528	0	525	0	525	0	525	0	525	0	525	0	525	0	525	0	525	0	0	526.438	0.5625
7.1423	0	530	0	530	0	525	0	525	0	530	0	525	0	530	0	528	0	525	0	525	0	525	0	525	0	525	0	525	0	525	0	525	0	0	526.438	0.5625
7.1534	0	530	0	530	0	525	0	525	0	530	0	525	0	530	0	528	0	525	0	525	0	525	0	525	0	525	0	525	0	525	0	525	0	0	526.438	0.5625
7.1646	0	530	0	530	0	525	0	525	0	530	0	525	0	530	0	528	0	525	0	525	0	525	0	525	0	525	0	525	0	525	0	525	0	0	526.438	0.5625
7.1758	0	530	0	530	0	525	0	525	0	530	0	525	0	530	0	528	0	525	0	525	0	525	0	525	0	525	0	525	0	525	0	525	0	0	526.438	0.5625
7.1869	0	530	0	530	0	525	0	525	0	530	0	525	0	530	0	528	0	525	0	525	0	525	0	525	0	525	0	525	0	525	0	525	0	0	526.438	0.5625
7.1981	0	530	0	530	0	525	0	525	0	530	0	525	0	530	0	528	0	525	0	525	0	525	0	525	0	525	0	525	0	525	0	525	0	0	526.438	0.5625
7.2092	0	530	0	530	0	525	0	525	0	530	0	525	0	530	0	528	0	525	0	525	0	525	0	525	0	525	0	525	0	525	0	525	0	0	526.438	0.5625
7.2204	0	530	0	530	0	525	0	525	0	530	0	525	0	530	0	528	0	525	0	525	0	525	0	525	0	525	0	525	0	525	0	525	0	0	526.438	0.5625
7.2316	0	530	0	530	0	525	0	525	0	530	0	525	0	530	0	528	0	525	0	525	0	525	0	525	0	525	0	525	0	525	0	525	0	0	526.438	0.5625
7.2427	0	530	0	530	0	525	0	525	0	530	0	525	0	530	0	528	0	525	0	525	0	525	0	525	0	525	0	525	0	525	0	525	0	0	526.438	0.5625
7.2539	0	530	0	530	0	525	0	525	0	530	0	525	0	530	0	528	0	525	0	525	0	525	0	525	0	525	0	525	0	525	0	525	0	0	526.438	0.5625
7.265	0	530	0	530	0	525	0	525	0	530	0	525	0	530	0	528	0	525	0	525	0	525	0	525	0	525	0	525	0	525	0	525	0	0	526.438	0.5625
7.2762	0	530	0	530	0	525	0	525	0	530	0	525	0	530	0	528	0	525	0	525	0	525	0	525	0	525	0	525	0	525	0	525	0	0	526.438	0.5625
7.2874	0	530	0	530	0	525	0	525	0	530	0	525	0	530	0	528	0	525	0	525	0	525	0	525	0	525	0	525	0	525	0	525	0	0	526.438	0.5625
7.2985	0	530	0	530	0	525	0	525	0	530	0	525	0	530	0	528	0	525	0	525	0	525	0	525	0	525	0	525	0	525	0	525	0	0	526.438	0.5625
7.3097	0	530	0	530	0	525	0	525	0	530	0	525	0	530	0	528	0	525	0	525	0	525	0	525	0	525	0	525	0	525	0	525	0	0	526.438	0.5625
7.3208	0	530	0	530	0	525	0	525	0	530	0	525	0	530	0	528	0	525	0	525	0	525	0	525	0	525	0	525	0	525	0	525	0	0	526.438	0.5625
7.332	0	530	0	530	0	525	0	525	0	530	0	525	0	530	0	528	0	525	0	525	0	525	0	525	0	525	0	525	0	525	0	525	0	0	526.438	0.5625
7.3432	0	530	0	530	0	525	0	525	0	530	0	525	0	530	0	528	0	525	0	525	0	525	0	525	0	525	0	525	0	525	0	525	0	0	526.438	0.5625
7.3543	0	530	0	530	0	525	0	525	0	530	0	525	0	530	0	528	0	525	0	525	0	525	0	525	0	525	0	525	0	525	0	525	0	0	526.438	0.5625
7.3655	0	530	0	530	0	525	0	525	0	530	0	525	0	530	0	528	0	525	0	525	0	525	0	525	0	525	0	525	0	525	0	525	0	0	526.438	0.5625
7.3766	0	530	0	530	0	525	0	525	0	530	0	525	0	530	0	528	0	525	0	525	0	525	0	525	0	525	0	525	0	525	0	525	0	0	526.438	0.5625
7.3878	0	530	0	530	0	525	0	525	0	530	0	525	0	530	0	528	0	525	0	525	0	525	0	525	0	525	0	525	0	525	0	525	0	0	526.438	0.5625
7.399	0	530	0	530	0	525	0	525	0	530	0	525	0	530	0	528	0	525	0	525	0	525	0	525	0	525	0	525	0	525	0	525	0	0	526.438	0.5625
7.4101	0	530	0	530	0	525	0	525	0	530	0	525	0	530	0	528	0	525	0	525	0	525	0	525	0	525	0	525	0	525	0	525	0	0	526.438	0.5625
7.4213	0	530	0	530	0	525	0	525	0	530	0	525	0	530	0	528	0	525	0	525	0	525	0	525	0	525	0	525	0	525	0	525	0	0	526.438	0.5625
7.4324	0	530	0	530	0	525	0	525	0	530	0	525	0	530	0	528	0	525	0	525	0	525	0	525	0	525	0	525	0	525	0	525	0	0	526.438	0.5625
7.4436	0	530	0	530	0	525	0	525	0	530	0	525	0	530	0	528	0	525	0	525	0	525	0	525	0	525	0	525	0	525	0	525	0	0	526.438	0.5625
7.4548	0	530	0	530	0	525	0	525	0	530	0	525	0	530	0	528	0	525	0	525	0	525	0	525	0	525	0	525	0	525	0	525	0	0	526.438	0.5625
7.4659	0	530	0	530	0	525	0	525	0	530	0	525	0	530	0	528	0	525	0	525	0	525	0	525	0	525	0	525	0	525	0	525	0	0	526.438	0.5625
7.4771	0	530	0	530	0	525	0	525	0	530	0	525	0	530	0	528	0	525	0	525	0	525	0	525	0	525	0	525	0	525	0	525	0	0	526.438	0.5625
7.4882	0	530	0	530	0	525	0	525	0	530	0	525	0	530	0	528	0	525	0	525	0	525	0	525	0	525	0	525	0	525	0	525	0	0	526.438	0.5625
7.4994	0	530	0	530	0	525	0	525	0	530	0	525	0	530	0	528	0	525	0	525	0	525	0	525	0	525	0	525	0	525	0	525	0	0	526.438	0.5625
7.5106	0	530	0	530	0	525	0	525	0	530	0	525	0	530	0	528	0	525	0	525	0	525	0	525	0	525	0	525	0	525	0	525	0	0	526.438	0.5625
7.5217	0	530	0	530	0	525	0	525	0	530	0	525	0	530	0	528	0	525	0	525	0	525	0	525	0	525	0	525	0	525	0	525	0	0	526.438	0.5625
7.5329	0	530	0	530	0	525	0	525	0	530	0	525	0	530	0	528	0	525	0	525	0	525	0	525	0	525	0	525	0	525	0	525	0	0	526.438	0.5625
7.544	0	530	0	530	0	525	0	525	0	530	0	525	0	530	0	528	0	525	0	525	0	525	0	525	0	525	0	525	0	525	0	525	0	0	526.438	0.5625
7.5552	0	530	0	530	0	525	0	525	0	530	0	525	0	530	0	528	0	525	0	525	0	525	0	525	0	525	0	525	0	525	0	525	0	0	526.438	0.5625
7.5664	0	530	0	530	0	525	0	525	0	530	0	525	0	530	0	528	0	525	0	525	0	525	0	525	0	525	0	525	0	525	0	525	0	0	526.438	0.5625
7.5775	0	530	0	530	0	525	0	525	0	530	0	525	0	530	0	528	0	525	0	525	0	525	0	525	0	525	0	525	0	525	0	525	0	0	526.438	0.5625
7.5887	0	530	0	530	0	525	0	525	0	530	0	525	0	530	0	528	0	525	0	525	0	525	0	525	0	525	0	525	0	525	0	525	0	0	526.438	0.5625
7.5998	0	530	0	530	0	525	0	525	0	530	0	525	0	530	0	528	0	525	0	525	0	525	0	525	0	525	0	525	0	525	0	525	0	0	526.438	0.5625
7.611	0	530	0	530	0	525	0	525	0	530	0	525	0	530	0	528	0	525	0	525	0	525	0	525	0	525	0	525	0	525	0	525	0	0	526.438	0.5625
7.6222	0	530	0	530	0	525	0	525	0	530	0	525	0	530	0	528	0	525	0	525	0	525	0	525	0	525	0	525	0	525	0	525	0	0	526.438	0.5625
7.6333	0	530	0	530	0	525	0	525	0	530	0	525	0	530	0	528	0	525	0	525	0	525	0	525	0	525	0	525	0	525	0	525	0	0	526.438	0.5625
7.6445	0	530	0	530	0	525	0	525	0	530	0	525	0	530	0	528	0	525	0	525	0	525	0	525	0	525	0	525	0	525	0	525	0	0	526.438	0.5625
7.6556	0	530	0	530	0	525	0	525	0	530	0	525	0	530	0	528	0	525	0	525	0	525	0	525	0	525	0	525	0	525	0	525	0	0	526.438	0.5625
7.6668	0	530	0	530	0	525	0	525	0	530	0	525	0	530	0	528	0	525	0	525	0	525	0	525	0	525	0	525	0	525	0	525	0	0	526.438	0.5625
7.678	0	530	0	530	0	525	0	525	0	530	0	525	0	530	0	528	0	525	0	525	0	525	0	525	0	525	0	525	0	525	0	525	0	0	526.438	0.5625
7.6891	0	530	0	530	0	525	0	525	0	530	0	525	0	530	0	528	0	525	0	525	0	525	0	525	0	525	0	525	0	525	0	525	0	0	526.438	0.5625
7.7003	0	530	0	530	0	525	0	525	0	530	0	525	0	530	0	528	0	525	0	525	0	525	0	525	0	525	0	525	0	525	0	525	0	0	526.438	0.5625
7.7114	0	530	0	530	0	525	0	525	0	530	0	525	0	530	0	528	0	525	0	525	0	525	0	525	0	525	0	525	0	525	0	525	0	0	526.438	0.5625
7.7226	0	530	0	530	0	525	0	525	0	530	0	525	0	530	0	528	0	525	0	525	0	525	0	525	0	525	0	525	0	525	0	525	0	0	526.438	0.5625
7.7338	0	530	0	530	0	525	0	525	0	530	0	525	0	530	0	528	0	525	0	525	0	525	0	525	0	525	0	525	0	525	0	525	0	0	526.438	0.5625
7.7449	0	530	0	530	0	525	0	525	0	530	0	525	0	530	0	528	0	525	0	525	0	525	0	525	0	525	0	525	0	525	0	525	0	0	526.438	0.5625
7.7561	0	530	0	530	0	525	0	525	0	530	0	525	0	530	0	528	0	525	0	525	0	525	0	525	0	525	0	525	0	525	0	525	0	0	526.438	0.5625
7.7672	0	530	0	530	0	525	0	525	0	530	0	525	0	530	0	528	0	525	0	525	0	525	0	525	0	525	0	525	0	525	0	525	0	0	526.438	0.5625
7.7784	0	530	0	530	0	525	0	525	0	530	0	525	0	530	0	528	0	525	0	525	0	525	0	525	0	525	0	525	0	525	0	525	0	0	526.438	0.5625
7.7895	0	530	0	530	0	525	0	525	0	530	0	525	0	530	0	528	0	525	0	525	0	525	0	525	0	525	0	525	0	525	0	525	0	0	526.438	0.5625
7.8007	0	530	0	530	0	525	0	525	0	530	0	525	0	530	0	528	0	525	0	525	0	525	0	525	0	525	0	525	0	525	0	525	0	0	526.438	0.5625
7.8119	0	530	0	530	0	525	0	525	0	530	0	525	0	530	0	528	0	525	0	525	0	525	0	525	0	525	0	525	0	525	0	525	0	0	526.438	0.5625
7.823	0	530	0	530	0	525	0	525	0	530	0	525	0	530	0	528	0	525	0	525	0	525	0	525	0	525	0	525	0	525	0	525	0	0	526.438	0.5625
7.8342	0	530	0	530	0	525	0	525	0	530	0	525	0	530	0	528	0	525	0	525	0	525	0	525	0	525	0	525	0	525	0	525	0	0	526.438	0.5625
7.8453	0	530	0	530	0	525	0	525	0	530	0	525	0	530	0	528	0	525	0	525	0	525	0	525	0	525	0	525	0	525	0	525	0	0	526.438	0.5625
7.8565	0	530	0	530	0	525	0	525	0	530	0	525	0	530	0	528	0	525	0	525	0	525	0	525	0	525	0	525	0	525	0	525	0	0	526.438	0.5625
7.8677	0	530	0	530	0	525	0	525	0	530	0	525	0	530	0	528	0	525	0	525	0	525	0	525	0	525	0	525	0	525	0	525	0	0	526.438	0.5625
7.8788	0	530	0	530	0	525	0	525	0	530	0	525	0	530	0	528	0	525	0	525	0	525	0	525	0	525	0	525	0	525	0	525	0	0	526.438	0.5625
7.89	0	530	0	530	0	525	0	525	0	530	0	525	0	530	0	528	0	525	0	525	0	525	0	525	0	525	0	525	0	525	0	525	0	0	526.438	0.5625
7.9011	0	530	0	530	0	525	0	525	0	530	0	525	0	530	0	528	0	525	0	525	0	525	0	525	0	525	0	525	0	525	0	525	0	0	526.438	0.5625
7.9123	0	530	0	530	0	525	0	525	0	530	0	525	0	530	0	528	0	525	0	525	0	525	0	525	0	525	0	525	0	525	0	525	0	0	526.438	0.5625
7.9235	0	530	0	530	0	525	0	525	0	530	0	525	0	530	0	528	0	525	0	525	0	525	0	525	0	525	0	525	0	525	0	525	0	0	526.438	0.5625
7.9346	0	530	0	530	0	525	0	525	0	530	0	525	0	530	0	528	0	525	0	525	0	525	0	525	0	525	0	525	0	525	0	525	0	0	526.438	0.5625
7.9458	0	530	0	530	0	525	0	525	0	530	0	525	0	530	0	528	0	525	0	525	0	525	0	525	0	525	0	525	0	525	0	525	0	0	526.438	0.5625
7.9569	0	530	0	530	0	525	0	525	0	530	0	525	0	530	0	528	0	525	0	525	0	525	0	525	0	525	0	525	0	525	0	525	0	0	526.438	0.5625
7.9681	0	530	0	530	0	525	0	525	0	530	0	525	0	530	0	528	0	525	0	525	0	525	0	525	0	525	0	525	0	525	0	525	0	0	526.438	0.5625
7.9793	0	530	0	530	0	525	0	525	0	530	0	525	0	530	0	528	0	525	0	525	0	525	0	525	0	525	0	525	0	525	0	525	0	0	526.438	0.5625
7.9904	0	530	0	530	0	525	0	525	0	530	0	525	0	530	0	528	0	525	0	525	0	525	0	525	0	525	0	525	0	525	0	525	0	0	526.438	0.5625
8.0016	0	530	0	530	0	525	0	525	0	530	0	525	0	530	0	528	0	525	0	525	0	525	0	525	0	525	0	525	0	525	0	525	0	0	526.438	0.5625
8.0127	0	530	0	530	0	525	0	525	0	530	0	525	0	530	0	528	0	525	0	525	0	525	0	525	0	525	0	525	0	525	0	525	0	0	526.438	0.5625
8.0239	0	530	0	530	0	525	0	525	0	530	0	525	0	530	0	528	0	525	0	525	0	525	0	525	0	525	0	525	0	525	0	525	0	0	526.438	0.5625
8.0351	0	530	0	530	0	525	0	525	0	530	0	525	0	530	0	528	0	525	0	525	0	525	0	525	0	525	0	525	0	525	0	525	0	0	526.438	0.5625
8.0462	0	530	0	530	0	525	0	525	0	530	0	525	0	530	0	528	0	525	0	525	0	525	0	525	0	525	0	525	0	525	0	525	0	0	526.438	0.5625
8.0574	0	530	0	530	0	525	0	525	0	530	0	525	0	530	0	528	0	525	0	525	0	525	0	525	0	525	0	525	0	525	0	525	0	0	526.438	0.5625
8.0685	0	530	0	530	0	525	0	525	0	530	0	525	0	530	0	528	0	525	0	525	0	525	0	525	0	525	0	525	0	525	0	525	0	0	526.438	0.5625
8.0797	0	530	0	530	0	525	0	525	0	530	0	525	0	530	0	528	0	525	0	525	0	525	0	525	0	525	0	525	0	525	0	525	0	0	526.438	0.5625
8.0909	0	530	0	530	0	525	0	525	0	530	0	525	0	530	0	528	0	525	0	525	0	525	0	525	0	525	0	525	0	525	0	525	0	0	526.438	0.5625
8.102	0	530	0	530	0	525	0	525	0	530	0	525	0	530	0	528	0	525	0	525	0	525	0	525	0	525	0	525	0	525	0	525	0	0	526.438	0.5625
8.1132	0	530	0	530	0	525	0	525	0	530	0	525	0	530	0	528	0	525	0	525	0	525	0	525	0	525	0	525	0	525	0	525	0	0	526.438	0.5625
8.1243	0	530	0	530	0	525	0	525	0	530	0	525	0	530	0	528	0	525	0	525	0	525	0	525	0	525	0	525	0	525	0	525	0	0	526.438	0.5625
8.1355	0	530	0	530	0	525	0	525	0	530	0	525	0	530	0	528	0	525	0	525	0	525	0	525	0	525	0	525	0	525	0	525	0	0	526.438	0.5625
8.1467	0	530	0	530	0	525	0	525	0	530	0	525	0	530	0	528	0	525	0	525	0	525	0	525	0	525	0	525	0	525	0	525	0	0	526.438	0.5625
8.1578	0	530	0	530	0	525	0	525	0	530	0	525	0	530	0	528	0	525	0	525	0	525	0	525	0	525	0	525	0	525	0	525	0	0	526.438	0.5625
8.169	0	530	0	530	0	525	0	525	0	530	0	525	0	530	0	528	0	525	0	525	0	525	0	525	0	525	0	525	0	525	0	525	0	0	526.438	0.5625
8.1801	0	530	0	530	0	525	0	525	0	530	0	525	0	530	0	528	0	525	0	525	0	525	0	525	0	525	0	525	0	525	0	525	0	0	526.438	0.5625
8.1913	0	530	0	530	0	525	0	525	0	530	0	525	0	530	0	528	0	525	0	525	0	525	0	525	0	525	0	525	0	525	0	525	0	0	526.438	0.5625
8.2025	0	530	0	530	0	525	0	525	0	530	0	525	0	530	0	528	0	525	0	525	0	525	0	525	0	525	0	525	0	525	0	525	0	0	526.438	0.5625
8.2136	0	530	0	530	0	525	0	525	0	530	0	525	0	530	0	528	0	525	0	525	0	525	0	525	0	525	0	525	0	525	0	525	0	0	526.438	0.5625
8.2248	0	530	0	530	0	525	0	525	0	530	0	525	0	530	0	528	0	525	0	525	0	525	0	525	0	525	0	525	0	525	0	525	0	0	526.438	0.5625
8.2359	0	530	0	530	0	525	0	525	0	530	0	525	0	530	0	528	0	525	0	525	0	525	0	525	0	525	0	525	0	525	0	525	0	0	526.438	0.5625
8.2471	0	530	0	530	0	525	0	525	0	530	0	525	0	530	0	528	0	525	0	525	0	525	0	525	0	525	0	525	0	525	0	525	0	0	526.438	0.5625
8.2583	0	530	0	530	0	525	0	525	0	530	0	525	0	530	0	528	0	525	0	525	0	525	0	525	0	525	0	525	0	525	0	525	0	0	526.438	0.5625
8.2694	0	530	0	530	0	525	0	525	0	530	0	525	0	530	0	528	0	525	0	525	0	525	0	525	0	525	0	525	0	525	0	525	0	0	526.438	0.5625
8.2806	0	530	0	530	0	525	0	525	0	530	0	525	0	530	0	528	0	525	0	525	0	525	0	525	0	525	0	525	0	525	0	525	0	0	526.438	0.5625
8.2917	0	530	0	530	0	525	0	525	0	530	0	525	0	530	0	528	0	525	0	525	0	525	0	525	0	525	0	525	0	525	0	525	0	0	526.438	0.5625
8.3029	0	530	0	530	0	525	0	525	0	530	0	525	0	530	0	528	0	525	0	525	0	525	0	525	0	525	0	525	0	525	0	525	0	0	526.438	0.5625
8.3141	0	530	0	530	0	525	0	525	0	530	0	525	0	530	0	528	0	525	0	525	0	525	0	525	0	525	0	525	0	525	0	525	0	0	526.438	0.5625
8.3252	0	530	0	530	0	525	0	525	0	530	0	525	0	530	0	528	0	525	0	525	0	525	0	525	0	525	0	525	0	525	0	525	0	0	526.438	0.5625
8.3364	0	530	0	530	0	525	0	525	0	530	0	525	0	530	0	528	0	525	0	525	0	525	0	525	0	525	0	525	0	525	0	525	0	0	526.438	0.5625
8.3475	0	530	0	530	0	525	0	525	0	530	0	525	0	530	0	528	0	525	0	525	0	525	0	525	0	525	0	525	0	525	0	525	0	0	526.438	0.5625
8.3587	0	530	0	530	0	525	0	525	0	530	0	525	0	530	0	528	0	525	0	525	0	525	0	525	0	525	0	525	0	525	0	525	0	0	526.438	0.5625
8.3699	0	530	0	530	0	525	0	525	0	530	0	525	0	530	0	528	0	525	0	525	0	525	0	525	0	525	0	525	0	525	0	525	0	0	526.438	0.5625
8.381	0	530	0	530	0	525	0	525	0	530	0	525	0	530	0	528	0	525	0	525	0	525	0	525	0	525	0	525	0	525	0	525	0	0	526.438	0.5625
8.3922	0	530	0	530	0	525	0	525	0	530	0	525	0	530	0	528	0	525	0	525	0	525	0	525	0	525	0	525	0	525	0	525	0	0	526.438	0.5625
8.4033	0	530	0	530	0	525	0	525	0	530	0	525	0	530	0	528	0	525	0	525	0	525	0	525	0	525	0	525	0	525	0	525	0	0	526.438	0.5625
8.4145	0	530	0	530	0	525	0	525	0	530	0	525	0	530	0	528	0	525	0	525	0	525	0	525	0	525	0	525	0	525	0	525	0	0	526.438	0.5625
8.4257	0	530	0	530	0	525	0	525	0	530	0	525	0	530	0	528	0	525	0	525	0	525	0	525	0	525	0	525	0	525	0	525	0	0	526.438	0.5625
8.4368	0	530	0	530	0	525	0	525	0	530	0	525	0	530	0	528	0	525	0	525	0	525	0	525	0	525	0	525	0	525	0	525	0	0	526.438	0.5625
8.448	0	530	0	530	0	525	0	525	0	530	0	525	0	530	0	528	0	525	0	525	0	525	0	525	0	525	0	525	0	525	0	525	0	0	526.438	0.5625
8.4591	0	530	0	530	0	525	0	525	0	530	0	525	0	530	0	528	0	525	0	525	0	525	0	525	0	525	0	525	0	525	0	525	0	0	526.438	0.5625
8.4703	0	530	0	530	0	525	0	525	0	530	0	525	0	530	0	528	0	525	0	525	0	525	0	525	0	525	0	525	0	525	0	525	0	0	526.438	0.5625
8.4815	0	530	0	530	0	525	0	525	0	530	0	525	0	530	0	528	0	525	0	525	0	525	0	525	0	525	0	525	0	525	0	525	0	0	526.438	0.5625
8.4926	0	530	0	530	0	525	0	525	0	530	0	525	0	530	0	528	0	525	0	525	0	525	0	525	0	525	0	525	0	525	0	525	0	0	526.438	0.5625
8.5038	0	530	0	530	0	525	0	525	0	530	0	525	0	530	0	528	0	525	0	525	0	525	0	525	0	525	0	525	0	525	0	525	0	0	526.438	0.5625
8.5149	0	530	0	530	0	525	0	525	0	530	0	525	0	530	0	528	0	525	0	525	0	525	0	525	0	525	0	525	0	525	0	525	0	0	526.438	0.5625
8.5261	0	530	0	530	0	525	0	525	0	530	0	525	0	530	0	528	0	525	0	525	0	525	0	525	0	525	0	525	0	525	0	525	0	0	526.438	0.5625
8.5373	0	530	0	530	0	525	0	525	0	530	0	525	0	530	0	528	0	525	0	525	0	525	0	525	0	525	0	525	0	525	0	525	0	0	526.438	0.5625
8.5484	0	530	0	530	0	525	0	525	0	530	0	525	0	530	0	528	0	525	0	525	0	525	0	525	0	525	0	525	0	525	0	525	0	0	526.438	0.5625
8.5596	0	530	0	530	0	525	0	525	0	530	0	525	0	530	0	528	0	525	0	525	0	525	0	525	0	525	0	525	0	525	0	525	0	0	526.438	0.5625
8.5707	0	530	0	530	0	525	0	525	0	530	0	525	0	530	0	528	0	525	0	525	0	525	0	525	0	525	0	525	0	525	0	525	0	0	526.438	0.5625
8.5819	0	530	0	530	0	525	0	525	0	530	0	525	0	530	0	528	0	525	0	525	0	525	0	525	0	525	0	525	0	525	0	525	0	0	526.438	0.5625
8.5931	0	530	0	530	0	525	0	525	0	530	0	525	0	530	0	528	0	525	0	525	0	525	0	525	0	525	0	525	0	525	0	525	0	0	526.438	0.5625
8.6042	0	530	0	530	0	525	0	525	0	530	0	525	0	530	0	528	0	525	0	525	0	525	0	525	0	525	0	525	0	525	0	525	0	0	526.438	0.5625
8.6154	0	530	0	530	0	525	0	525	0	530	0	525	0	530	0	528	0	525	0	525	0	525	0	525	0	525	0	525	0	525	0	525	0	0	526.438	0.5625
8.6265	0	530	0	530	0	525	0	525	0	530	0	525	0	530	0	528	0	525	0	525	0	525	0	525	0	525	0	525	0	525	0	525	0	0	526.438	0.5625
8.6377	0	530	0	530	0	525	0	525	0	530	0	525	0	530	0	528	0	525	0	525	0	525	0	525	0	525	0	525	0	525	0	525	0	0	526.438	0.5625
8.6489	0	530	0	530	0	525	0	525	0	530	0	525	0	530	0	528	0	525	0	525	0	525	0	525	0	525	0	525	0	525	0	525	0	0	526.438	0.5625
8.66	0	530	0	530	0	525	0	525	0	530	0	525	0	530	0	528	0	525	0	525	0	525	0	525	0	525	0	525	0	525	0	525	0	0	526.438	0.5625
8.6712	0	530	0	530	0	525	0	525	0	530	0	525	0	530	0	528	0	525	0	525	0	525	0	525	0	525	0	525	0	525	0	525	0	0	526.438	0.5625
8.6823	0	530	0	530	0	525	0	525	0	530	0	525	0	530	0	528	0	525	0	525	0	525	0	525	0	525	0	525	0	525	0	525	0	0	526.438	0.5625
8.6935	0	530	0	530	0	525	0	525	0	530	0	525	0	530	0	528	0	525	0	525	0	525	0	525	0	525	0	525	0	525	0	525	0	0	526.438	0.5625
8.7047	0	530	0	530	0	525	0	525	0	530	0	525	0	530	0	528	0	525	0	525	0	525	0	525	0	525	0	525	0	525	0	525	0	0	526.438	0.5625
8.7158	0	530	0	530	0	525	0	525	0	530	0	525	0	530	0	528	0	525	0	525	0	525	0	525	0	525	0	525	0	525	0	525	0	0	526.438	0.5625
8.727	0	530	0	530	0	525	0	525	0	530	0	525	0	530	0	528	0	525	0	525	0	525	0	525	0	525	0	525	0	525	0	525	0	0	526.438	0.5625
8.7381	0	530	0	530	0	525	0	525	0	530	0	525	0	530	0	528	0	525	0	525	0	525	0	525	0	525	0	525	0	525	0	525	0	0	526.438	0.5625
8.7493	0	530	0	530	0	525	0	525	0	530	0	525	0	530	0	528	0	525	0	525	0	525	0	525	0	525	0	525	0	525	0	525	0	0	526.438	0.5625
8.7605	0	530	0	530	0	525	0	525	0	530	0	525	0	530	0	528	0	525	0	525	0	525	0	525	0	525	0	525	0	525	0	525	0	0	526.438	0.5625
8.7716	0	530	0	530	0	525	0	525	0	530	0	525	0	530	0	528	0	525	0	525	0	525	0	525	0	525	0	525	0	525	0	525	0	0	526.438	0.5625
8.7828	0	530	0	530	0	525	0	525	0	530	0	525	0	530	0	528	0	525	0	525	0	525	0	525	0	525	0	525	0	525	0	525	0	0	526.438	0.5625
8.7939	0	530	0	530	0	525	0	525	0	530	0	525	0	530	0	528	0	525	0	525	0	525	0	525	0	525	0	525	0	525	0	525	0	0	526.438	0.5625
8.8051	0	530	0	530	0	525	0	525	0	530	0	525	0	530	0	528	0	525	0	525	0	525	0	525	0	525	0	525	0	525	0	525	0	0	526.438	0.5625
8.8163	0	530	0	530	0	525	0	525	0	530	0	525	0	530	0	528	0	525	0	525	0	525	0	525	0	525	0	525	0	525	0	525	0	0	526.438	0.5625
8.8274	0	530	0	530	0	525	0	525	0	530	0	525	0	530	0	528	0	525	0	525	0	525	0	525	0	525	0	525	0	525	0	525	0	0	526.438	0.5625
8.8386	0	530	0	530	0	525	0	525	0	530	0	525	0	530	0	528	0	525	0	525	0	525	0	525	0	525	0	525	0	525	0	525	0	0	526.438	0.5625
8.8497	0	530	0	530	0	525	0	525	0	530	0	525	0	530	0	528	0	525	0	525	0	525	0	525	0	525	0	525	0	525	0	525	0	0	526.438	0.5625
8.8609	0	530	0	530	0	525	0	525	0	530	0	525	0	530	0	528	0	525	0	525	0	525	0	525	0	525	0	525	0	525	0	525	0	0	526.438	0.5625
8.8721	0	530	0	530	0	525	0	525	0	530	0	525	0	530	0	528	0	525	0	525	0	525	0	525	0	525	0	525	0	525	0	525	0	0	526.438	0.5625
8.8832	0	530	0	530	0	525	0	525	0	530	0	525	0	530	0	528	0	525	0	525	0	525	0	525	0	525	0	525	0	525	0	525	0	0	526.438	0.5625
8.8944	0	530	0	530	0	525	0	525	0	530	0	525	0	530	0	528	0	525	0	525	0	525	0	525	0	525	0	525	0	525	0	525	0	0	526.438	0.5625
8.9055	0	530	0	530	0	525	0	525	0	530	0	525	0	530	0	528	0	525	0	525	0	525	0	525	0	525	0	525	0	525	0	525	0	0	526.438	0.5625
8.9167	0	530	0	530	0	525	0	525	0	530	0	525	0	530	0	528	0	525	0	525	0	525	0	525	0	525	0	525	0	525	0	525	0	0	526.438	0.5625
8.9279	0	530	0	530	0	525	0	525	0	530	0	525	0	530	0	528	0	525	0	525	0	525	0	525	0	525	0	525	0	525	0	525	0	0	526.438	0.5625
8.939	0	530	0	530	0	525	0	525	0	530	0	525	0	530	0	528	0	525	0	525	0	525	0	525	0	525	0	525	0	525	0	525	0	0	526.438	0.5625
8.9502	0	530	0	530	0	525	0	525	0	530	0	525	0	530	0	528	0	525	0	525	0	525	0	525	0	525	0	525	0	525	0	525	0	0	526.438	0.5625
8.9613	0	530	0	530	0	525	0	525	0	530	0	525	0	530	0	528	0	525	0	525	0	525	0	525	0	525	0	525	0	525	0	525	0	0	526.438	0.5625
8.9725	0	530	0	530	0	525	0	525	0	530	0	525	0	530	0	528	0	525	0	525	0	525	0	525	0	525	0	525	0	525	0	525	0	0	526.438	0.5625
8.9836	0	530	0	530	0	525	0	525	0	530	0	525	0	530	0	528	0	525	0	525	0	525	0	525	0	525	0	525	0	525	0	525	0	0	526.438	0.5625
8.9948	0	530	0	530	0	525	0	525	0	530	0	525	0	530	0	528	0	525	0	525	0	525	0	525	0	525	0	525	0	525	0	525	0	0	526.438	0.5625
9.006	0	530	0	530	0	525	0	525	0	530	0	525	0	530	0	528	0	525	0	525	0	525	0	525	0	525	0	525	0	525	0	525	0	0	526.438	0.5625
9.0171	0	530	0	530	0	525	0	525	0	530	0	525	0	530	0	528	0	525	0	525	0	525	0	525	0	525	0	525	0	525	0	525	0	0	526.438	0.5625
9.0283	0	530	0	530	0	525	0	525	0	530	0	525	0	530	0	528	0	525	0	525	0	525	0	525	0	525	0	525	0	525	0	525	0	0	526.438	0.5625
9.0394	0	530	0	530	0	525	0	525	0	530	0	525	0	530	0	528	0	525	0	525	0	525	0	525	0	525	0	525	0	525	0	525	0	0	526.438	0.5625
9.0506	0	530	0	530	0	525	0	525	0	530	0	525	0	530	0	528	0	525	0	525	0	525	0	525	0	525	0	525	0	525	0	525	0	0	526.438	0.5625
9.0618	0	530	0	530	0	525	0	525	0	530	0	525	0	530	0	528	0	525	0	525	0	525	0	525	0	525	0	525	0	525	0	525	0	0	526.438	0.5625
9.0729	0	530	0	530	0	525	0	525	0	530	0	525	0	530	0	528	0	525	0	525	0	525	0	525	0	525	0	525	0	525	0	525	0	0	526.438	0.5625
9.0841	0	530	0	530	0	525	0	525	0	530	0	525	0	530	0	528	0	525	0	525	0	525	0	525	0	525	0	525	0	525	0	525	0	0	526.438	0.5625
9.0952	0	530	0	530	0	525	0	525	0	530	0	525	0	530	0	528	0	525	0	525	0	525	0	525	0	525	0	525	0	525	0	525	0	0	526.438	0.5625
9.1064	0	530	0	530	0	525	0	525	0	530	0	525	0	530	0	528	0	525	0	525	0	525	0	525	0	525	0	525	0	525	0	525	0	0	526.438	0.5625
9.1176	0	530	0	530	0	525	0	525	0	530	0	525	0	530	0	528	0	525	0	525	0	525	0	525	0	525	0	525	0	525	0	525	0	0	526.438	0.5625
9.1287	0	530	0	530	0	525	0	525	0	530	0	525	0	530	0	528	0	525	0	525	0	525	0	525	0	525	0	525	0	525	0	525	0	0	526.438	0.5625
9.1399	0	530	0	530	0	525	0	525	0	530	0	525	0	530	0	528	0	525	0	525	0	525	0	525	0	525	0	525	0	525	0	525	0	0	526.438	0.5625
9.151	0	530	0	530	0	525	0	525	0	530	0	525	0	530	0	528	0	525	0	525	0	525	0	525	0	525	0	525	0	525	0	525	0	0	526.438	0.5625
9.1622	0	530	0	530	0	525	0	525	0	530	0	525	0	530	0	528	0	525	0	525	0	525	0	525	0	525	0	525	0	525	0	525	0	0	526.438	0.5625
9.1734	0	530	0	530	0	525	0	525	0	530	0	525	0	530	0	528	0	525	0	525	0	525	0	525	0	525	0	525	0	525	0	525	0	0	526.438	0.5625
9.1845	0	530	0	530	0	525	0	525	0	530	0	525	0	530	0	528	0	525	0	525	0	525	0	525	0	525	0	525	0	525	0	525	0	0	526.438	0.5625
9.1957	0	530	0	530	0	525	0	525	0	530	0	525	0	530	0	528	0	525	0	525	0	525	0	525	0	525	0	525	0	525	0	525	0	0	526.438	0.5625
9.2068	0	530	0	530	0	525	0	525	0	530	0	525	0	530	0	528	0	525	0	525	0	525	0	525	0	525	0	525	0	525	0	525	0	0	526.438	0.5625
9.218	0	530	0	530	0	525	0	525	0	530	0	525	0	530	0	528	0	525	0	525	0	525	0	525	0	525	0	525	0	525	0	525	0	0	526.438	0.5625
9.2292	0	530	0	530	0	525	0	525	0	530	0	525	0	530	0	528	0	525	0	525	0	525	0	525	0	525	0	525	0	525	0	525	0	0	526.438	0.5625
9.2403	0	530	0	530	0	525	0	525	0	530	0	525	0	530	0	528	0	525	0	525	0	525	0	525	0	525	0	525	0	525	0	525	0	0	526.438	0.5625
9.2515	0	530	0	530	0	525	0	525	0	530	0	525	0	530	0	528	0	525	0	525	0	525	0	525	0	525	0	525	0	525	0	525	0	0	526.438	0.5625
9.2626	0	530	0	530	0	525	0	525	0	530	0	525	0	530	0	528	0	525	0	525	0	525	0	525	0	525	0	525	0	525	0	525	0	0	526.438	0.5625
9.2738	0	530	0	530	0	525	0	525	0	530	0	525	0	530	0	528	0	525	0	525	0	525	0	525	0	525	0	525	0	525	0	525	0	0	526.438	0.5625
9.285	0	530	0	530	0	525	0	525	0	530	0	525	0	530	0	528	0	525	0	525	0	525	0	525	0	525	0	525	0	525	0	525	0	0	526.438	0.5625
9.2961	0	530	0	530	0	525	0	525	0	530	0	525	0	530	0	528	0	525	0	525	0	525	0	525	0	525	0	525	0	525	0	525	0	0	526.438	0.5625
9.3073	0	530	0	530	0	525	0	525	0	530	0	525	0	530	0	528	0	525	0	525	0	525	0	525	0	525	0	525	0	525	0	525	0	0	526.438	0.5625
9.3184	0	530	0	530	0	525	0	525	0	530	0	525	0	530	0	528	0	525	0	525	0	525	0	525	0	525	0	525	0	525	0	525	0	0	526.438	0.5625
9.3296	0	530	0	530	0	525	0	525	0	530	0	525	0	530	0	528	0	525	0	525	0	525	0	525	0	525	0	525	0	525	0	525	0	0	526.438	0.5625
9.3408	0	530	0	530	0	525	0	525	0	530	0	525	0	530	0	528	0	525	0	525	0	525	0	525	0	525	0	525	0	525	0	525	0	0	526.438	0.5625
9.3519	0	530	0	530	0	525	0	525	0	530	0	525	0	530	0	528	0	525	0	525	0	525	0	525	0	525	0	525	0	525	0	525	0	0	526.438	0.5625
9.3631	0	530	0	530	0	525	0	525	0	530	0	525	0	530	0	528	0	525	0	525	0	525	0	525	0	525	0	525	0	525	0	525	0	0	526.438	0.5625
9.3742	0	530	0	530	0	525	0	525	0	530	0	525	0	530	0	528	0	525	0	525	0	525	0	525	0	525	0	525	0	525	0	525	0	0	526.438	0.5625
9.3854	0	530	0	530	0	525	0	525	0	530	0	525	0	530	0	528	0	525	0	525	0	525	0	525	0	525	0	525	0	525	0	525	0	0	526.438	0.5625
9.3966	0	530	0	530	0	525	0	525	0	530	0	525	0	530	0	528	0	525	0	525	0	525	0	525	0	525	0	525	0	525	0	525	0	0	526.438	0.5625
9.4077	0	530	0	530	0	525	0	525	0	530	0	525	0	530	0	528	0	525	0	525	0	525	0	525	0	525	0	525	0	525	0	525	0	0	526.438	0.5625
9.4189	0	530	0	530	0	525	0	525	0	530	0	525	0	530	0	528	0	525	0	525	0	525	0	525	0	525	0	525	0	525	0	525	0	0	526.438	0.5625
9.43	0	530	0	530	0	525	0	525	0	530	0	525	0	530	0	528	0	525	0	525	0	525	0	525	0	525	0	525	0	525	0	525	0	0	526.438	0.5625
9.4412	0	530	0	530	0	525	0	525	0	530	0	525	0	530	0	528	0	525	0	525	0	525	0	525	0	525	0	525	0	525	0	525	0	0	526.438	0.5625
9.4524	0	530	0	530	0	525	0	525	0	530	0	525	0	530	0	528	0	525	0	525	0	525	0	525	0	525	0	525	0	525	0	525	0	0	526.438	0.5625
9.4635	0	530	0	530	0	525	0	525	0	530	0	525	0	530	0	528	0	525	0	525	0	525	0	525	0	525	0	525	0	525	0	525	0	0	526.438	0.5625
9.4747	0	530	0	530	0	525	0	525	0	530	0	525	0	530	0	528	0	525	0	525	0	525	0	525	0	525	0	525	0	525	0	525	0	0	526.438	0.5625
9.4858	0	530	0	530	0	525	0	525	0	530	0	525	0	530	0	528	0	525	0	525	0	525	0	525	0	525	0	525	0	525	0	525	0	0	526.438	0.5625
9.497	0	530	0	530	0	525	0	525	0	530	0	525	0	530	0	528	0	525	0	525	0	525	0	525	0	525	0	525	0	525	0	525	0	0	526.438	0.5625
9.5082	0	530	0	530	0	525	0	525	0	530	0	525	0	530	0	528	0	525	0	525	0	525	0	525	0	525	0	525	0	525	0	525	0	0	526.438	0.5625
9.5193	0	530	0	530	0	525	0	525	0	530	0	525	0	530	0	528	0	525	0	525	0	525	0	525	0	525	0	525	0	525	0	525	0	0	526.438	0.5625
9.5305	0	530	0	530	0	525	0	525	0	530	0	525	0	530	0	528	0	525	0	525	0	525	0	525	0	525	0	525	0	525	0	525	0	0	526.438	0.5625
9.5416	0	530	0	530	0	525	0	525	0	530	0	525	0	530	0	528	0	525	0	525	0	525	0	525	0	525	0	525	0	525	0	525	0	0	526.438	0.5625
9.5528	0	530	0	530	0	525	0	525	0	530	0	525	0	530	0	528	0	525	0	525	0	525	0	525	0	525	0	525	0	525	0	525	0	0	526.438	0.5625
9.564	0	530	0	530	0	525	0	525	0	530	0	525	0	530	0	528	0	525	0	525	0	525	0	525	0	525	0	525	0	525	0	525	0	0	526.438	0.5625
9.5751	0	530	0	530	0	525	0	525	0	530	0	525	0	530	0	528	0	525	0	525	0	525	0	525	0	525	0	525	0	525	0	525	0	0	526.438	0.5625
9.5863	0	530	0	530	0	525	0	525	0	530	0	525	0	530	0	528	0	525	0	525	0	525	0	525	0	525	0	525	0	525	0	525	0	0	526.438	0.5625
9.5974	0	530	0	530	0	525	0	525	0	530	0	525	0	530	0	528	0	525	0	525	0	525	0	525	0	525	0	525	0	525	0	525	0	0	526.438	0.5625
9.6086	0	530	0	530	0	525	0	525	0	530	0	525	0	530	0	528	0	525	0	525	0	525	0	525	0	525	0	525	0	525	0	525	0	0	526.438	0.5625
9.6198	0	530	0	530	0	525	0	525	0	530	0	525	0	530	0	528	0	525	0	525	0	525	0	525	0	525	0	525	0	525	0	525	0	0	526.438	0.5625
9.6309	0	530	0	530	0	525	0	525	0	530	0	525	0	530	0	528	0	525	0	525	0	525	0	525	0	525	0	525	0	525	0	525	0	0	526.438	0.5625
9.6421	0	530	0	530	0	525	0	525	0	530	0	525	0	530	0	528	0	525	0	525	0	525	0	525	0	525	0	525	0	525	0	525	0	0	526.438	0.5625
9.6532	0	530	0	530	0	525	0	525	0	530	0	525	0	530	0	528	0	525	0	525	0	525	0	525	0	525	0	525	0	525	0	525	0	0	526.438	0.5625
9.6644	0	530	0	530	0	525	0	525	0	530	0	525	0	530	0	528	0	525	0	525	0	525	0	525	0	525	0	525	0	525	0	525	0	0	526.438	0.5625
9.6756	0	530	0	530	0	525	0	525	0	530	0	525	0	530	0	528	0	525	0	525	0	525	0	525	0	525	0	525	0	525	0	525	0	0	526.438	0.5625
9.6867	0	530	0	530	0	525	0	525	0	530	0	525	0	530	0	528	0	525	0	525	0	525	0	525	0	525	0	525	0	525	0	525	0	0	526.438	0.5625
9.6979	0	530	0	530	0	525	0	525	0	530	0	525	0	530	0	528	0	525	0	525	0	525	0	525	0	525	0	525	0	525	0	525	0	0	526.438	0.5625
9.709	0	530	0	530	0	525	0	525	0	530	0	525	0	530	0	528	0	525	0	525	0	525	0	525	0	525	0	525	0	525	0	525	0	0	526.438	0.5625
9.7202	0	530	0	530	0	525	0	525	0	530	0	525	0	530	0	528	0	525	0	525	0	525	0	525	0	525	0	525	0	525	0	525	0	0	526.438	0.5625
9.7314	0	530	0	530	0	525	0	525	0	530	0	525	0	530	0	528	0	525	0	525	0	525	0	525	0	525	0	525	0	525	0	525	0	0	526.438	0.5625
9.7425	0	530	0	530	0	525	0	525	0	530	0	525	0	530	0	528	0	525	0	525	0	525	0	525	0	525	0	525	0	525	0	525	0	0	526.438	0.5625
9.7537	0	530	0	530	0	525	0	525	0	530	0	525	0	530	0	528	0	525	0	525	0	525	0	525	0	525	0	525	0	525	0	525	0	0	526.438	0.5625
9.7648	0	530	0	530	0	525	0	525	0	530	0	525	0	530	0	528	0	525	0	525	0	525	0	525	0	525	0	525	0	525	0	525	0	0	526.438	0.5625
9.776	0	530	0	530	0	525	0	525	0	530	0	525	0	530	0	528	0	525	0	525	0	525	0	525	0	525	0	525	0	525	0	525	0	0	526.438	0.5625
9.7872	0	530	0	530	0	525	0	525	0	530	0	525	0	530	0	528	0	525	0	525	0	525	0	525	0	525	0	525	0	525	0	525	0	0	526.438	0.5625
9.7983	0	530	0	530	0	525	0	525	0	530	0	525	0	530	0	528	0	525	0	525	0	525	0	525	0	525	0	525	0	525	0	525	0	0	526.438	0.5625
9.8095	0	530	0	530	0	525	0	525	0	530	0	525	0	530	0	528	0	525	0	525	0	525	0	525	0	525	0	525	0	525	0	525	0	0	526.438	0.5625
9.8206	0	530	0	530	0	525	0	525	0	530	0	525	0	530	0	528	0	525	0	525	0	525	0	525	0	525	0	525	0	525	0	525	0	0	526.438	0.5625
9.8318	0	530	0	530	0	525	0	525	0	530	0	525	0	530	0	528	0	525	0	525	0	525	0	525	0	525	0	525	0	525	0	525	0	0	526.438	0.5625
9.843	0	530	0	530	0	525	0	525	0	530	0	525	0	530	0	528	0	525	0	525	0	525	0	525	0	525	0	525	0	525	0	525	0	0	526.438	0.5625
9.8541	0	530	0	530	0	525	0	525	0	530	0	525	0	530	0	528	0	525	0	525	0	525	0	525	0	525	0	525	0	525	0	525	0	0	526.438	0.5625
9.8653	0	530	0	530	0	525	0	525	0	530	0	525	0	530	0	528	0	525	0	525	0	525	0	525	0	525	0	525	0	525	0	525	0	0	526.438	0.5625
9.8764	0	530	0	530	0	525	0	525	0	530	0	525	0	530	0	528	0	525	0	525	0	525	0	525	0	525	0	525	0	525	0	525	0	0	526.438	0.5625
9.8876	0	530	0	530	0	525	0	525	0	530	0	525	0	530	0	528	0	525	0	525	0	525	0	525	0	525	0	525	0	525	0	525	0	0	526.438	0.5625
9.8988	0	530	0	530	0	525	0	525	0	530	0	525	0	530	0	528	0	525	0	525	0	525	0	525	0	525	0	525	0	525	0	525	0	0	526.438	0.5625
9.9099	0	530	0	530	0	525	0	525	0	530	0	525	0	530	0	528	0	525	0	525	0	525	0	525	0	525	0	525	0	525	0	525	0	0	526.438	0.5625
9.9211	0	530	0	530	0	525	0	525	0	530	0	525	0	530	0	528	0	525	0	525	0	525	0	525	0	525	0	525	0	525	0	525	0	0	526.438	0.5625
9.9322	0	530	0	530	0	525	0	525	0	530	0	525	0	530	0	528	0	525	0	525	0	525	0	525	0	525	0	525	0	525	0	525	0	0	526.438	0.5625
9.9434	0	530	0	530	0	525	0	525	0	530	0	525	0	530	0	528	0	525	0	525	0	525	0	525	0	525	0	525	0	525	0	525	0	0	526.438	0.5625
9.9546	0	530	0	530	0	525	0	525	0	530	0	525	0	530	0	528	0	525	0	525	0	525	0	525	0	525	0	525	0	525	0	525	0	0	526.438	0.5625
9.9657	0	530	0	530	0	525	0	525	0	530	0	525	0	530	0	528	0	525	0	525	0	525	0	525	0	525	0	525	0	525	0	525	0	0	526.438	0.5625
9.9769	0	530	0	530	0	525	0	525	0	530	0	525	0	530	0	528	0	525	0	525	0	525	0	525	0	525	0	525	0	525	0	525	0	0	526.438	0.5625
9.988	0	530	0	530	0	525	0	525	0	530	0	525	0	530	0	528	0	525	0	525	0	525	0	525	0	525	0	525	0	525	0	525	0	0	526.438	0.5625
9.9992	0	530	0	530	0	525	0	525	0	530	0	525	0	530	0	528	0	525	0	525	0	525	0	525	0	525	0	525	0	525	0	525	0	0	526.438	0.5625
10.0104	0	530	0	530	0	525	0	525	0	530	0	525	0	530	0	528	0	525	0	525	0	525	0	525	0	525	0	525	0	525	0	525	0	0	526.438	0.5625
10.0215	0	530	0	530	0	525	0	525	0	530	0	525	0	530	0	528	0	525	0	525	0	525	0	525	0	525	0	525	0	525	0	525	0	0	526.438	0.5625
10.0327	0	530	0	530	0	525	0	525	0	530	0	525	0	530	0	528	0	525	0	525	0	525	0	525	0	525	0	525	0	525	0	525	0	0	526.438	0.5625
10.0438	0	530	0	530	0	525	0	525	0	530	0	525	0	530	0	528	0	525	0	525	0	525	0	525	0	525	0	525	0	525	0	525	0	0	526.438	0.5625
10.055	0	530	0	530	0	525	0	525	0	530	0	525	0	530	0	528	0	525	0	525	0	525	0	525	0	525	0	525	0	525	0	525	0	0	526.438	0.5625
10.0662	0	530	0	530	0	525	0	525	0	530	0	525	0	530	0	528	0	525	0	525	0	525	0	525	0	525	0	525	0	525	0	525	0	0	526.438	0.5625
10.0773	0	530	0	530	0	525	0	525	0	530	0	525	0	530	0	528	0	525	0	525	0	525	0	525	0	525	0	525	0	525	0	525	0	0	526.438	0.5625
10.0885	0	530	0	530	0	525	0	525	0	530	0	525	0	530	0	528	0	525	0	525	0	525	0	525	0	525	0	525	0	525	0	525	0	0	526.438	0.5625
10.0996	0	530	0	530	0	525	0	525	0	530	0	525	0	530	0	528	0	525	0	525	0	525	0	525	0	525	0	525	0	525	0	525	0	0	526.438	0.5625
10.1108	0	530	0	530	0	525	0	525	0	530	0	525	0	530	0	528	0	525	0	525	0	525	0	525	0	525	0	525	0	525	0	525	0	0	526.438	0.5625
10.122	0	530	0	530	0	525	0	525	0	530	0	525	0	530	0	528	0	525	0	525	0	525	0	525	0	525	0	525	0	525	0	525	0	0	526.438	0.5625
10.1331	0	530	0	530	0	525	0	525	0	530	0	525	0	530	0	528	0	525	0	525	0	525	0	525	0	525	0	525	0	525	0	525	0	0	526.438	0.5625
10.1443	0	530	0	530	0	525	0	525	0	530	0	525	0	530	0	528	0	525	0	525	0	525	0	525	0	525	0	525	0	525	0	525	0	0	526.438	0.5625
10.1554	0	530	0	530	0	525	0	525	0	530	0	525	0	530	0	528	0	525	0	525	0	525	0	525	0	525	0	525	0	525	0	525	0	0	526.438	0.5625
10.1666	0	530	0	530	0	525	0	525	0	530	0	525	0	530	0	528	0	525	0	525	0	525	0	525	0	525	0	525	0	525	0	525	0	0	526.438	0.5625
10.1777	0	530	0	530	0	525	0	525	0	530	0	525	0	530	0	528	0	525	0	525	0	525	0	525	0	525	0	525	0	525	0	525	0	0	526.438	0.5625
10.1889	0	530	0	530	0	525	0	525	0	530	0	525	0	530	0	528	0	525	0	525	0	525	0	525	0	525	0	525	0	525	0	525	0	0	526.438	0.5625
10.2001	0	530	0	530	0	525	0	525	0	530	0	525	0	530	0	528	0	525	0	525	0	525	0	525	0	525	0	525	0	525	0	525	0	0	526.438	0.5625
10.2112	0	530	0	530	0	525	0	525	0	530	0	525	0	530	0	528	0	525	0	525	0	525	0	525	0	525	0	525	0	525	0	525	0	0	526.438	0.5625
10.2224	0	530	0	530	0	525	0	525	0	530	0	525	0	530	0	528	0	525	0	525	0	525	0	525	0	525	0	525	0	525	0	525	0	0	526.438	0.5625
10.2335	0	530	0	530	0	525	0	525	0	530	0	525	0	530	0	528	0	525	0	525	0	525	0	525	0	525	0	525	0	525	0	525	0	0	526.438	0.5625
10.2447	0	530	0	530	0	525	0	525	0	530	0	525	0	530	0	528	0	525	0	525	0	525	0	525	0	525	0	525	0	525	0	525	0	0	526.438	0.5625
10.2559	0	530	0	530	0	525	0	525	0	530	0	525	0	530	0	528	0	525	0	525	0	525	0	525	0	525	0	525	0	525	0	525	0	0	526.438	0.5625
10.267	0	530	0	530	0	525	0	525	0	530	0	525	0	530	0	528	0	525	0	525	0	525	0	525	0	525	0	525	0	525	0	525	0	0	526.438	0.5625
10.2782	0	530	0	530	0	525	0	525	0	530	0	525	0	530	0	528	0	525	0	525	0	525	0	525	0	525	0	525	0	525	0	525	0	0	526.438	0.5625
10.2893	0	530	0	530	0	525	0	525	0	530	0	525	0	530	0	528	0	525	0	525	0	525	0	525	0	525	0	525	0	525	0	525	0	0	526.438	0.5625
10.3005	0	530	0	530	0	525	0	525	0	530	0	525	0	530	0	528	0	525	0	525	0	525	0	525	0	525	0	525	0	525	0	525	0	0	526.438	0.5625
10.3117	0	530	0	530	0	525	0	525	0	530	0	525	0	530	0	528	0	525	0	525	0	525	0	525	0	525	0	525	0	525	0	525	0	0	526.438	0.5625
10.3228	0	530	0	530	0	525	0	525	0	530	0	525	0	530	0	528	0	525	0	525	0	525	0	525	0	525	0	525	0	525	0	525	0	0	526.438	0.5625
10.334	0	530	0	530	0	525	0	525	0	530	0	525	0	530	0	528	0	525	0	525	0	525	0	525	0	525	0	525	0	525	0	525	0	0	526.438	0.5625
10.3451	0	530	0	530	0	525	0	525	0	530	0	525	0	530	0	528	0	525	0	525	0	525	0	525	0	525	0	525	0	525	0	525	0	0	526.438	0.5625
10.3563	0	530	0	530	0	525	0	525	0	530	0	525	0	530	0	528	0	525	0	525	0	525	0	525	0	525	0	525	0	525	0	525	0	0	526.438	0.5625
10.3675	0	530	0	530	0	525	0	525	0	530	0	525	0	530	0	528	0	525	0	525	0	525	0	525	0	525	0	525	0	525	0	525	0	0	526.438	0.5625
10.3786	0	530	0	530	0	525	0	525	0	530	0	525	0	530	0	528	0	525	0	525	0	525	0	525	0	525	0	525	0	525	0	525	0	0	526.438	0.5625
10.3898	0	530	0	530	0	525	0	525	0	530	0	525	0	530	0	528	0	525	0	525	0	525	0	525	0	525	0	525	0	525	0	525	0	0	526.438	0.5625
10.4009	0	530	0	530	0	525	0	525	0	530	0	525	0	530	0	528	0	525	0	525	0	525	0	525	0	525	0	525	0	525	0	525	0	0	526.438	0.5625
10.4121	0	530	0	530	0	525	0	525	0	530	0	525	0	530	0	528	0	525	0	525	0	525	0	525	0	525	0	525	0	525	0	525	0	0	526.438	0.5625
10.4233	0	530	0	530	0	525	0	525	0	530	0	525	0	530	0	528	0	525	0	525	0	525	0	525	0	525	0	525	0	525	0	525	0	0	526.438	0.5625
10.4344	0	530	0	530	0	525	0	525	0	530	0	525	0	530	0	528	0	525	0	525	0	525	0	525	0	525	0	525	0	525	0	525	0	0	526.438	0.5625
10.4456	0	530	0	530	0	525	0	525	0	530	0	525	0	530	0	528	0	525	0	525	0	525	0	525	0	525	0	525	0	525	0	525	0	0	526.438	0.5625
10.4567	0	530	0	530	0	525	0	525	0	530	0	525	0	530	0	528	0	525	0	525	0	525	0	525	0	525	0	525	0	525	0	525	0	0	526.438	0.5625
10.4679	0	530	0	530	0	525	0	525	0	530	0	525	0	530	0	528	0	525	0	525	0	525	0	525	0	525	0	525	0	525	0	525	0	0	526.438	0.5625
10.4791	0	530	0	530	0	525	0	525	0	530	0	525	0	530	0	528	0	525	0	525	0	525	0	525	0	525	0	525	0	525	0	525	0	0	526.438	0.5625
10.4902	0	530	0	530	0	525	0	525	0	530	0	525	0	530	0	528	0	525	0	525	0	525	0	525	0	525	0	525	0	525	0	525	0	0	526.438	0.5625
10.5014	0	530	0	530	0	525	0	525	0	530	0	525	0	530	0	528	0	525	0	525	0	525	0	525	0	525	0	525	0	525	0	525	0	0	526.438	0.5625
10.5125	0	530	0	530	0	525	0	525	0	530	0	525	0	530	0	528	0	525	0	525	0	525	0	525	0	525	0	525	0	525	0	525	0	0	526.438	0.5625
10.5237	0	530	0	530	0	525	0	525	0	530	0	525	0	530	0	528	0	525	0	525	0	525	0	525	0	525	0	525	0	525	0	525	0	0	526.438	0.5625
10.5349	0	530	0	530	0	525	0	525	0	530	0	525	0	530	0	528	0	525	0	525	0	525	0	525	0	525	0	525	0	525	0	525	0	0	526.438	0.5625
10.546	0	530	0	530	0	525	0	525	0	530	0	525	0	530	0	528	0	525	0	525	0	525	0	525	0	525	0	525	0	525	0	525	0	0	526.438	0.5625
10.5572	0	530	0	530	0	525	0	525	0	530	0	525	0	530	0	528	0	525	0	525	0	525	0	525	0	525	0	525	0	525	0	525	0	0	526.438	0.5625
10.5683	0	530	0	530	0	525	0	525	0	530	0	525	0	530	0	528	0	525	0	525	0	525	0	525	0	525	0	525	0	525	0	525	0	0	526.438	0.5625
10.5795	0	530	0	530	0	525	0	525	0	530	0	525	0	530	0	528	0	525	0	525	0	525	0	525	0	525	0	525	0	525	0	525	0	0	526.438	0.5625
10.5907	0	530	0	530	0	525	0	525	0	530	0	525	0	530	0	528	0	525	0	525	0	525	0	525	0	525	0	525	0	525	0	525	0	0	526.438	0.5625
10.6018	0	530	0	530	0	525	0	525	0	530	0	525	0	530	0	528	0	525	0	525	0	525	0	525	0	525	0	525	0	525	0	525	0	0	526.438	0.5625
10.613	0	530	0	530	0	525	0	525	0	530	0	525	0	530	0	528	0	525	0	525	0	525	0	525	0	525	0	525	0	525	0	525	0	0	526.438	0.5625
10.6241	0	530	0	530	0	525	0	525	0	530	0	525	0	530	0	528	0	525	0	525	0	525	0	525	0	525	0	525	0	525	0	525	0	0	526.438	0.5625
10.6353	0	530	0	530	0	525	0	525	0	530	0	525	0	530	0	528	0	525	0	525	0	525	0	525	0	525	0	525	0	525	0	525	0	0	526.438	0.5625
10.6465	0	530	0	530	0	525	0	525	0	530	0	525	0	530	0	528	0	525	0	525	0	525	0	525	0	525	0	525	0	525	0	525	0	0	526.438	0.5625
10.6576	0	530	0	530	0	525	0	525	0	530	0	525	0	530	0	528	0	525	0	525	0	525	0	525	0	525	0	525	0	525	0	525	0	0	526.438	0.5625
10.6688	0	530	0	530	0	525	0	525	0	530	0	525	0	530	0	528	0	525	0	525	0	525	0	525	0	525	0	525	0	525	0	525	0	0	526.438	0.5625
10.6799	0	530	0	530	0	525	0	525	0	530	0	525	0	530	0	528	0	525	0	525	0	525	0	525	0	525	0	525	0	525	0	525	0	0	526.438	0.5625
10.6911	0	530	0	530	0	525	0	525	0	530	0	525	0	530	0	528	0	525	0	525	0	525	0	525	0	525	0	525	0	525	0	525	0	0	526.438	0.5625
10.7023	0	530	0	530	0	525	0	525	0	530	0	525	0	530	0	528	0	525	0	525	0	525	0	525	0	525	0	525	0	525	0	525	0	0	526.438	0.5625
10.7134	0	530	0	530	0	525	0	525	0	530	0	525	0	530	0	528	0	525	0	525	0	525	0	525	0	525	0	525	0	525	0	525	0	0	526.438	0.5625
10.7246	0	530	0	530	0	525	0	525	0	530	0	525	0	530	0	528	0	525	0	525	0	525	0	525	0	525	0	525	0	525	0	525	0	0	526.438	0.5625
10.7357	0	530	0	530	0	525	0	525	0	530	0	525	0	530	0	528	0	525	0	525	0	525	0	525	0	525	0	525	0	525	0	525	0	0	526.438	0.5625
10.7469	0	530	0	530	0	525	0	525	0	530	0	525	0	530	0	528	0	525	0	525	0	525	0	525	0	525	0	525	0	525	0	525	0	0	526.438	0.5625
10.7581	0	530	0	530	0	525	0	525	0	530	0	525	0	530	0	528	0	525	0	525	0	525	0	525	0	525	0	525	0	525	0	525	0	0	526.438	0.5625
10.7692	0	530	0	530	0	525	0	525	0	530	0	525	0	530	0	528	0	525	0	525	0	525	0	525	0	525	0	525	0	525	0	525	0	0	526.438	0.5625
10.7804	0	530	0	530	0	525	0	525	0	530	0	525	0	530	0	528	0	525	0	525	0	525	0	525	0	525	0	525	0	525	0	525	0	0	526.438	0.5625
10.7915	0	530	0	530	0	525	0	525	0	530	0	525	0	530	0	528	0	525	0	525	0	525	0	525	0	525	0	525	0	525	0	525	0	0	526.438	0.5625
10.8027	0	530	0	530	0	525	0	525	0	530	0	525	0	530	0	528	0	525	0	525	0	525	0	525	0	525	0	525	0	525	0	525	0	0	526.438	0.5625
10.8139	0	530	0	530	0	525	0	525	0	530	0	525	0	530	0	528	0	525	0	525	0	525	0	525	0	525	0	525	0	525	0	525	0	0	526.438	0.5625
10.825	0	530	0	530	0	525	0	525	0	530	0	525	0	530	0	528	0	525	0	525	0	525	0	525	0	525	0	525	0	525	0	525	0	0	526.438	0.5625
10.8362	0	530	0	530	0	525	0	525	0	530	0	525	0	530	0	528	0	525	0	525	0	525	0	525	0	525	0	525	0	525	0	525	0	0	526.438	0.5625
10.8473	0	530	0	530	0	525	0	525	0	530	0	525	0	530	0	528	0	525	0	525	0	525	0	525	0	525	0	525	0	525	0	525	0	0	526.438	0.5625
10.8585	0	530	0	530	0	525	0	525	0	530	0	525	0	530	0	528	0	525	0	525	0	525	0	525	0	525	0	525	0	525	0	525	0	0	526.438	0.5625
10.8697	0	530	0	530	0	525	0	525	0	530	0	525	0	530	0	528	0	525	0	525	0	525	0	525	0	525	0	525	0	525	0	525	0	0	526.438	0.5625
10.8808	0	530	0	530	0	525	0	525	0	530	0	525	0	530	0	528	0	525	0	525	0	525	0	525	0	525	0	525	0	525	0	525	0	0	526.438	0.5625
10.892	0	530	0	530	0	525	0	525	0	530	0	525	0	530	0	528	0	525	0	525	0	525	0	525	0	525	0	525	0	525	0	525	0	0	526.438	0.5625
10.9031	0	530	0	530	0	525	0	525	0	530	0	525	0	530	0	528	0	525	0	525	0	525	0	525	0	525	0	525	0	525	0	525	0	0	526.438	0.5625
10.9143	0	530	0	530	0	525	0	525	0	530	0	525	0	530	0	528	0	525	0	525	0	525	0	525	0	525	0	525	0	525	0	525	0	0	526.438	0.5625
10.9255	0	530	0	530	0	525	0	525	0	530	0	525	0	530	0	528	0	525	0	525	0	525	0	525	0	525	0	525	0	525	0	525	0	0	526.438	0.5625
10.9366	0	530	0	530	0	525	0	525	0	530	0	525	0	530	0	528	0	525	0	525	0	525	0	525	0	525	0	525	0	525	0	525	0	0	526.438	0.5625
10.9478	0	530	0	530	0	525	0	525	0	530	0	525	0	530	0	528	0	525	0	525	0	525	0	525	0	525	0	525	0	525	0	525	0	0	526.438	0.5625
10.9589	0	530	0	530	0	525	0	525	0	530	0	525	0	530	0	528	0	525	0	525	0	525	0	525	0	525	0	525	0	525	0	525	0	0	526.438	0.5625
10.9701	0	530	0	530	0	525	0	525	0	530	0	525	0	530	0	528	0	525	0	525	0	525	0	525	0	525	0	525	0	525	0	525	0	0	526.438	0.5625
10.9813	0	530	0	530	0	525	0	525	0	530	0	525	0	530	0	528	0	525	0	525	0	525	0	525	0	525	0	525	0	525	0	525	0	0	526.438	0.5625
10.9924	0	530	0	530	0	525	0	525	0	530	0	525	0	530	0	528	0	525	0	525	0	525	0	525	0	525	0	525	0	525	0	525	0	0	526.438	0.5625
11.0036	0	530	0	530	0	525	0	525	0	530	0	525	0	530	0	528	0	525	0	525	0	525	0	525	0	525	0	525	0	525	0	525	0	0	526.438	0.5625
11.0147	0	530	0	530	0	525	0	525	0	530	0	525	0	530	0	528	0	525	0	525	0	525	0	525	0	525	0	525	0	525	0	525	0	0	526.438	0.5625
11.0259	0	530	0	530	0	525	0	525	0	530	0	525	0	530	0	528	0	525	0	525	0	525	0	525	0	525	0	525	0	525	0	525	0	0	526.438	0.5625
11.0371	0	530	0	530	0	525	0	525	0	530	0	525	0	530	0	528	0	525	0	525	0	525	0	525	0	525	0	525	0	525	0	525	0	0	526.438	0.5625
11.0482	0	530	0	530	0	525	0	525	0	530	0	525	0	530	0	528	0	525	0	525	0	525	0	525	0	525	0	525	0	525	0	525	0	0	526.438	0.5625
11.0594	0	530	0	530	0	525	0	525	0	530	0	525	0	530	0	528	0	525	0	525	0	525	0	525	0	525	0	525	0	525	0	525	0	0	526.438	0.5625
11.0705	0	530	0	530	0	525	0	525	0	530	0	525	0	530	0	528	0	525	0	525	0	525	0	525	0	525	0	525	0	525	0	525	0	0	526.438	0.5625
11.0817	0	530	0	530	0	525	0	525	0	530	0	525	0	530	0	528	0	525	0	525	0	525	0	525	0	525	0	525	0	525	0	525	0	0	526.438	0.5625
11.0929	0	530	0	530	0	525	0	525	0	530	0	525	0	530	0	528	0	525	0	525	0	525	0	525	0	525	0	525	0	525	0	525	0	0	526.438	0.5625
11.104	0	530	0	530	0	525	0	525	0	530	0	525	0	530	0	528	0	525	0	525	0	525	0	525	0	525	0	525	0	525	0	525	0	0	526.438	0.5625
11.1152	0	530	0	530	0	525	0	525	0	530	0	525	0	530	0	528	0	525	0	525	0	525	0	525	0	525	0	525	0	525	0	525	0	0	526.438	0.5625
11.1263	0	530	0	530	0	525	0	525	0	530	0	525	0	530	0	528	0	525	0	525	0	525	0	525	0	525	0	525	0	525	0	525	0	0	526.438	0.5625
11.1375	0	530	0	530	0	525	0	525	0	530	0	525	0	530	0	528	0	525	0	525	0	525	0	525	0	525	0	525	0	525	0	525	0	0	526.438	0.5625
11.1487	0	530	0	530	0	525	0	525	0	530	0	525	0	530	0	528	0	525	0	525	0	525	0	525	0	525	0	525	0	525	0	525	0	0	526.438	0.5625
11.1598	0	530	0	530	0	525	0	525	0	530	0	525	0	530	0	528	0	525	0	525	0	525	0	525	0	525	0	525	0	525	0	525	0	0	526.438	0.5625
11.171	0	530	0	530	0	525	0	525	0	530	0	525	0	530	0	528	0	525	0	525	0	525	0	525	0	525	0	525	0	525	0	525	0	0	526.438	0.5625
11.1821	0	530	0	530	0	525	0	525	0	530	0	525	0	530	0	528	0	525	0	525	0	525	0	525	0	525	0	525	0	525	0	525	0	0	526.438	0.5625
11.1933	0	530	0	530	0	525	0	525	0	530	0	525	0	530	0	528	0	525	0	525	0	525	0	525	0	525	0	525	0	525	0	525	0	0	526.438	0.5625
11.2045	0	530	0	530	0	525	0	525	0	530	0	525	0	530	0	528	0	525	0	525	0	525	0	525	0	525	0	525	0	525	0	525	0	0	526.438	0.5625
11.2156	0	530	0	530	0	525	0	525	0	530	0	525	0	530	0	528	0	525	0	525	0	525	0	525	0	525	0	525	0	525	0	525	0	0	526.438	0.5625
11.2268	0	530	0	530	0	525	0	525	0	530	0	525	0	530	0	528	0	525	0	525	0	525	0	525	0	525	0	525	0	525	0	525	0	0	526.438	0.5625
11.2379	0	530	0	530	0	525	0	525	0	530	0	525	0	530	0	528	0	525	0	525	0	525	0	525	0	525	0	525	0	525	0	525	0	0	526.438	0.5625
11.2491	0	530	0	530	0	525	0	525	0	530	0	525	0	530	0	528	0	525	0	525	0	525	0	525	0	525	0	525	0	525	0	525	0	0	526.438	0.5625
11.2603	0	530	0	530	0	525	0	525	0	530	0	525	0	530	0	528	0	525	0	525	0	525	0	525	0	525	0	525	0	525	0	525	0	0	526.438	0.5625
11.2714	0	530	0	530	0	525	0	525	0	530	0	525	0	530	0	528	0	525	0	525	0	525	0	525	0	525	0	525	0	525	0	525	0	0	526.438	0.5625
11.2826	0	530	0	530	0	525	0	525	0	530	0	525	0	530	0	528	0	525	0	525	0	525	0	525	0	525	0	525	0	525	0	525	0	0	526.438	0.5625
11.2937	0	530	0	530	0	525	0	525	0	530	0	525	0	530	0	528	0	525	0	525	0	525	0	525	0	525	0	525	0	525	0	525	0	0	526.438	0.5625
11.3049	0	530	0	530	0	525	0	525	0	530	0	525	0	530	0	528	0	525	0	525	0	525	0	525	0	525	0	525	0	525	0	525	0	0	526.438	0.5625
11.3161	0	530	0	530	0	525	0	525	0	530	0	525	0	530	0	528	0	525	0	525	0	525	0	525	0	525	0	525	0	525	0	525	0	0	526.438	0.5625
11.3272	0	530	0	530	0	525	0	525	0	530	0	525	0	530	0	528	0	525	0	525	0	525	0	525	0	525	0	525	0	525	0	525	0	0	526.438	0.5625
11.3384	0	530	0	530	0	525	0	525	0	530	0	525	0	530	0	528	0	525	0	525	0	525	0	525	0	525	0	525	0	525	0	525	0	0	526.438	0.5625
11.3495	0	530	0	530	0	525	0	525	0	530	0	525	0	530	0	528	0	525	0	525	0	525	0	525	0	525	0	525	0	525	0	525	0	0	526.438	0.5625
11.3607	0	530	0	530	0	525	0	525	0	530	0	525	0	530	0	528	0	525	0	525	0	525	0	525	0	525	0	525	0	525	0	525	0	0	526.438	0.5625
11.3718	0	530	0	530	0	525	0	525	0	530	0	525	0	530	0	528	0	525	0	525	0	525	0	525	0	525	0	525	0	525	0	525	0	0	526.438	0.5625
11.383	0	530	0	530	0	525	0	525	0	530	0	525	0	530	0	528	0	525	0	525	0	525	0	525	0	525	0	525	0	525	0	525	0	0	526.438	0.5625
11.3942	0	530	0	530	0	525	0	525	0	530	0	525	0	530	0	528	0	525	0	525	0	525	0	525	0	525	0	525	0	525	0	525	0	0	526.438	0.5625
11.4053	0	530	0	530	0	525	0	525	0	530	0	525	0	530	0	528	0	525	0	525	0	525	0	525	0	525	0	525	0	525	0	525	0	0	526.438	0.5625
11.4165	0	530	0	530	0	525	0	525	0	530	0	525	0	530	0	528	0	525	0	525	0	525	0	525	0	525	0	525	0	525	0	525	0	0	526.438	0.5625
11.4276	0	530	0	530	0	525	0	525	0	530	0	525	0	530	0	528	0	525	0	525	0	525	0	525	0	525	0	525	0	525	0	525	0	0	526.438	0.5625
11.4388	0	530	0	530	0	525	0	525	0	530	0	525	0	530	0	528	0	525	0	525	0	525	0	525	0	525	0	525	0	525	0	525	0	0	526.438	0.5625
11.45	0	530	0	530	0	525	0	525	0	530	0	525	0	530	0	528	0	525	0	525	0	525	0	525	0	525	0	525	0	525	0	525	0	0	526.438	0.5625
11.4611	0	530	0	530	0	525	0	525	0	530	0	525	0	530	0	528	0	525	0	525	0	525	0	525	0	525	0	525	0	525	0	525	0	0	526.438	0.5625
11.4723	0	530	0	530	0	525	0	525	0	530	0	525	0	530	0	528	0	525	0	525	0	525	0	525	0	525	0	525	0	525	0	525	0	0	526.438	0.5625
11.4834	0	530	0	530	0	525	0	525	0	530	0	525	0	530	0	528	0	525	0	525	0	525	0	525	0	525	0	525	0	525	0	525	0	0	526.438	0.5625
11.4946	0	530	0	530	0	525	0	525	0	530	0	525	0	530	0	528	0	525	0	525	0	525	0	525	0	525	0	525	0	525	0	525	0	0	526.438	0.5625
11.5058	0	530	0	530	0	525	0	525	0	530	0	525	0	530	0	528	0	525	0	525	0	525	0	525	0	525	0	525	0	525	0	525	0	0	526.438	0.5625
11.5169	0	530	0	530	0	525	0	525	0	530	0	525	0	530	0	528	0	525	0	525	0	525	0	525	0	525	0	525	0	525	0	525	0	0	526.438	0.5625
11.5281	0	530	0	530	0	525	0	525	0	530	0	525	0	530	0	528	0	525	0	525	0	525	0	525	0	525	0	525	0	525	0	525	0	0	526.438	0.5625
11.5392	0	530	0	530	0	525	0	525	0	530	0	525	0	530	0	528	0	525	0	525	0	525	0	525	0	525	0	525	0	525	0	525	0	0	526.438	0.5625
11.5504	0	530	0	530	0	525	0	525	0	530	0	525	0	530	0	528	0	525	0	525	0	525	0	525	0	525	0	525	0	525	0	525	0	0	526.438	0.5625
11.5616	0	530	0	530	0	525	0	525	0	530	0	525	0	530	0	528	0	525	0	525	0	525	0	525	0	525	0	525	0	525	0	525	0	0	526.438	0.5625
11.5727	0	530	0	530	0	525	0	525	0	530	0	525	0	530	0	528	0	525	0	525	0	525	0	525	0	525	0	525	0	525	0	525	0	0	526.438	0.5625
11.5839	0	530	0	530	0	525	0	525	0	530	0	525	0	530	0	528	0	525	0	525	0	525	0	525	0	525	0	525	0	525	0	525	0	0	526.438	0.5625
11.595	0	530	0	530	0	525	0	525	0	530	0	525	0	530	0	528	0	525	0	525	0	525	0	525	0	525	0	525	0	525	0	525	0	0	526.438	0.5625
11.6062	0	530	0	530	0	525	0	525	0	530	0	525	0	530	0	528	0	525	0	525	0	525	0	525	0	525	0	525	0	525	0	525	0	0	526.438	0.5625
11.6174	0	530	0	530	0	525	0	525	0	530	0	525	0	530	0	528	0	525	0	525	0	525	0	525	0	525	0	525	0	525	0	525	0	0	526.438	0.5625
11.6285	0	530	0	530	0	525	0	525	0	530	0	525	0	530	0	528	0	525	0	525	0	525	0	525	0	525	0	525	0	525	0	525	0	0	526.438	0.5625
11.6397	0	530	0	530	0	525	0	525	0	530	0	525	0	530	0	528	0	525	0	525	0	525	0	525	0	525	0	525	0	525	0	525	0	0	526.438	0.5625
11.6508	0	530	0	530	0	525	0	525	0	530	0	525	0	530	0	528	0	525	0	525	0	525	0	525	0	525	0	525	0	525	0	525	0	0	526.438	0.5625
11.662	0	530	0	530	0	525	0	525	0	530	0	525	0	530	0	528	0	525	0	525	0	525	0	525	0	525	0	525	0	525	0	525	0	0	526.438	0.5625
11.6732	0	530	0	530	0	525	0	525	0	530	0	525	0	530	0	528	0	525	0	525	0	525	0	525	0	525	0	525	0	525	0	525	0	0	526.438	0.5625
11.6843	0	530	0	530	0	525	0	525	0	530	0	525	0	530	0	528	0	525	0	525	0	525	0	525	0	525	0	525	0	525	0	525	0	0	526.438	0.5625
11.6955	0	530	0	530	0	525	0	525	0	530	0	525	0	530	0	528	0	525	0	525	0	525	0	525	0	525	0	525	0	525	0	525	0	0	526.438	0.5625
11.7066	0	530	0	530	0	525	0	525	0	530	0	525	0	530	0	528	0	525	0	525	0	525	0	525	0	525	0	525	0	525	0	525	0	0	526.438	0.5625
11.7178	0	530	0	530	0	525	0	525	0	530	0	525	0	530	0	528	0	525	0	525	0	525	0	525	0	525	0	525	0	525	0	525	0	0	526.438	0.5625
11.729	0	530	0	530	0	525	0	525	0	530	0	525	0	530	0	528	0	525	0	525	0	525	0	525	0	525	0	525	0	525	0	525	0	0	526.438	0.5625
11.7401	0	530	0	530	0	525	0	525	0	530	0	525	0	530	0	528	0	525	0	525	0	525	0	525	0	525	0	525	0	525	0	525	0	0	526.438	0.5625
11.7513	0	530	0	530	0	525	0	525	0	530	0	525	0	530	0	528	0	525	0	525	0	525	0	525	0	525	0	525	0	525	0	525	0	0	526.438	0.5625
11.7624	0	530	0	530	0	525	0	525	0	530	0	525	0	530	0	528	0	525	0	525	0	525	0	525	0	525	0	525	0	525	0	525	0	0	526.438	0.5625
11.7736	0	530	0	530	0	525	0	525	0	530	0	525	0	530	0	528	0	525	0	525	0	525	0	525	0	525	0	525	0	525	0	525	0	0	526.438	0.5625
11.7848	0	530	0	530	0	525	0	525	0	530	0	525	0	530	0	528	0	525	0	525	0	525	0	525	0	525	0	525	0	525	0	525	0	0	526.438	0.5625
11.7959	0	530	0	530	0	525	0	525	0	530	0	525	0	530	0	528	0	525	0	525	0	525	0	525	0	525	0	525	0	525	0	525	0	0	526.438	0.5625
11.8071	0	530	0	530	0	525	0	525	0	530	0	525	0	530	0	528	0	525	0	525	0	525	0	525	0	525	0	525	0	525	0	525	0	0	526.438	0.5625
11.8182	0	530	0	530	0	525	0	525	0	530	0	525	0	530	0	528	0	525	0	525	0	525	0	525	0	525	0	525	0	525	0	525	0	0	526.438	0.5625
11.8294	0	530	0	530	0	525	0	525	0	530	0	525	0	530	0	528	0	525	0	525	0	525	0	525	0	525	0	525	0	525	0	525	0	0	526.438	0.5625
11.8406	0	530	0	530	0	525	0	525	0	530	0	525	0	530	0	528	0	525	0	525	0	525	0	525	0	525	0	525	0	525	0	525	0	0	526.438	0.5625
11.8517	0	530	0	530	0	525	0	525	0	530	0	525	0	530	0	528	0	525	0	525	0	525	0	525	0	525	0	525	0	525	0	525	0	0	526.438	0.5625
11.8629	0	530	0	530	0	525	0	525	0	530	0	525	0	530	0	528	0	525	0	525	0	525	0	525	0	525	0	525	0	525	0	525	0	0	526.438	0.5625
11.874	0	530	0	530	0	525	0	525	0	530	0	525	0	530	0	528	0	525	0	525	0	525	0	525	0	525	0	525	0	525	0	525	0	0	526.438	0.5625
11.8852	0	530	0	530	0	525	0	525	0	530	0	525	0	530	0	528	0	525	0	525	0	525	0	525	0	525	0	525	0	525	0	525	0	0	526.438	0.5625
11.8964	0	530	0	530	0	525	0	525	0	530	0	525	0	530	0	528	0	525	0	525	0	525	0	525	0	525	0	525	0	525	0	525	0	0	526.438	0.5625
11.9075	0	530	0	530	0	525	0	525	0	530	0	525	0	530	0	528	0	525	0	525	0	525	0	525	0	525	0	525	0	525	0	525	0	0	526.438	0.5625
11.9187	0	530	0	530	0	525	0	525	0	530	0	525	0	530	0	528	0	525	0	525	0	525	0	525	0	525	0	525	0	525	0	525	0	0	526.438	0.5625
11.9298	0	530	0	530	0	525	0	525	0	530	0	525	0	530	0	528	0	525	0	525	0	525	0	525	0	525	0	525	0	525	0	525	0	0	526.438	0.5625
11.941	0	530	0	530	0	525	0	525	0	530	0	525	0	530	0	528	0	525	0	525	0	525	0	525	0	525	0	525	0	525	0	525	0	0	526.438	0.5625
11.9522	0	530	0	530	0	525	0	525	0	530	0	525	0	530	0	528	0	525	0	525	0	525	0	525	0	525	0	525	0	525	0	525	0	0	526.438	0.5625
11.9633	0	530	0	530	0	525	0	525	0	530	0	525	0	530	0	528	0	525	0	525	0	525	0	525	0	525	0	525	0	525	0	525	0	0	526.438	0.5625
11.9745	0	530	0	530	0	525	0	525	0	530	0	525	0	530	0	528	0	525	0	525	0	525	0	525	0	525	0	525	0	525	0	525	0	0	526.438	0.5625
11.9856	0	530	0	530	0	525	0	525	0	530	0	525	0	530	0	528	0	525	0	525	0	525	0	525	0	525	0	525	0	525	0	525	0	0	526.438	0.5625
11.9968	0	530	0	530	0	525	0	525	0	530	0	525	0	530	0	528	0	525	0	525	0	525	0	525	0	525	0	525	0	525	0	525	0	0	526.438	0.5625
12.008	0	530	0	530	0	525	0	525	0	530	0	525	0	530	0	528	0	525	0	525	0	525	0	525	0	525	0	525	0	525	0	525	0	0	526.438	0.5625
12.0191	0	530	0	530	0	525	0	525	0	530	0	525	0	530	0	528	0	525	0	525	0	525	0	525	0	525	0	525	0	525	0	525	0	0	526.438	0.5625
12.0303	0	530	0	530	0	525	0	525	0	530	0	525	0	530	0	528	0	525	0	525	0	525	0	525	0	525	0	525	0	525	0	525	0	0	526.438	0.5625
12.0414	0	530	0	530	0	525	0	525	0	530	0	525	0	530	0	528	0	525	0	525	0	525	0	525	0	525	0	525	0	525	0	525	0	0	526.438	0.5625
12.0526	0	530	0	530	0	525	0	525	0	530	0	525	0	530	0	528	0	525	0	525	0	525	0	525	0	525	0	525	0	525	0	525	0	0	526.438	0.5625
12.0638	0	530	0	530	0	525	0	525	0	530	0	525	0	530	0	528	0	525	0	525	0	525	0	525	0	525	0	525	0	525	0	525	0	0	526.438	0.5625
12.0749	0	530	0	530	0	525	0	525	0	530	0	525	0	530	0	528	0	525	0	525	0	525	0	525	0	525	0	525	0	525	0	525	0	0	526.438	0.5625
12.0861	0	530	0	530	0	525	0	525	0	530	0	525	0	530	0	528	0	525	0	525	0	525	0	525	0	525	0	525	0	525	0	525	0	0	526.438	0.5625
12.0972	0	530	0	530	0	525	0	525	0	530	0	525	0	530	0	528	0	525	0	525	0	525	0	525	0	525	0	525	0	525	0	525	0	0	526.438	0.5625
12.1084	0	530	0	530	0	525	0	525	0	530	0	525	0	530	0	528	0	525	0	525	0	525	0	525	0	525	0	525	0	525	0	525	0	0	526.438	0.5625
12.1196	0	530	0	530	0	525	0	525	0	530	0	525	0	530	0	528	0	525	0	525	0	525	0	525	0	525	0	525	0	525	0	525	0	0	526.438	0.5625
12.1307	0	530	0	530	0	525	0	525	0	530	0	525	0	530	0	528	0	525	0	525	0	525	0	525	0	525	0	525	0	525	0	525	0	0	526.438	0.5625
12.1419	0	530	0	530	0	525	0	525	0	530	0	525	0	530	0	528	0	525	0	525	0	525	0	525	0	525	0	525	0	525	0	525	0	0	526.438	0.5625
12.153	0	530	0	530	0	525	0	525	0	530	0	525	0	530	0	528	0	525	0	525	0	525	0	525	0	525	0	525	0	525	0	525	0	0	526.438	0.5625
12.1642	0	530	0	530	0	525	0	525	0	530	0	525	0	530	0	528	0	525	0	525	0	525	0	525	0	525	0	525	0	525	0	525	0	0	526.438	0.5625
12.1754	0	530	0	530	0	525	0	525	0	530	0	525	0	530	0	528	0	525	0	525	0	525	0	525	0	525	0	525	0	525	0	525	0	0	526.438	0.5625
12.1865	0	530	0	530	0	525	0	525	0	530	0	525	0	530	0	528	0	525	0	525	0	525	0	525	0	525	0	525	0	525	0	525	0	0	526.438	0.5625
12.1977	0	530	0	530	0	525	0	525	0	530	0	525	0	530	0	528	0	525	0	525	0	525	0	525	0	525	0	525	0	525	0	525	0	0	526.438	0.5625
12.2088	0	530	0	530	0	525	0	525	0	530	0	525	0	530	0	528	0	525	0	525	0	525	0	525	0	525	0	525	0	525	0	525	0	0	526.438	0.5625
12.22	0	530	0	530	0	525	0	525	0	530	0	525	0	530	0	528	0	525	0	525	0	525	0	525	0	525	0	525	0	525	0	525	0	0	526.438	0.5625
12.2312	0	530	0	530	0	525	0	525	0	530	0	525	0	530	0	528	0	525	0	525	0	525	0	525	0	525	0	525	0	525	0	525	0	0	526.438	0.5625
12.2423	0	530	0	530	0	525	0	525	0	530	0	525	0	530	0	528	0	525	0	525	0	525	0	525	0	525	0	525	0	525	0	525	0	0	526.438	0.5625
12.2535	0	530	0	530	0	525	0	525	0	530	0	525	0	530	0	528	0	525	0	525	0	525	0	525	0	525	0	525	0	525	0	525	0	0	526.438	0.5625
12.2646	0	530	0	530	0	525	0	525	0	530	0	525	0	530	0	528	0	525	0	525	0	525	0	525	0	525	0	525	0	525	0	525	0	0	526.438	0.5625
12.2758	0	530	0	530	0	525	0	525	0	530	0	525	0	530	0	528	0	525	0	525	0	525	0	525	0	525	0	525	0	525	0	525	0	0	526.438	0.5625
12.287	0	530	0	530	0	525	0	525	0	530	0	525	0	530	0	528	0	525	0	525	0	525	0	525	0	525	0	525	0	525	0	525	0	0	526.438	0.5625
12.2981	0	530	0	530	0	525	0	525	0	530	0	525	0	530	0	528	0	525	0	525	0	525	0	525	0	525	0	525	0	525	0	525	0	0	526.438	0.5625
12.3093	0	530	0	530	0	525	0	525	0	530	0	525	0	530	0	528	0	525	0	525	0	525	0	525	0	525	0	525	0	525	0	525	0	0	526.438	0.5625
12.3204	0	530	0	530	0	525	0	525	0	530	0	525	0	530	0	528	0	525	0	525	0	525	0	525	0	525	0	525	0	525	0	525	0	0	526.438	0.5625
12.3316	0	530	0	530	0	525	0	525	0	530	0	525	0	530	0	528	0	525	0	525	0	525	0	525	0	525	0	525	0	525	0	525	0	0	526.438	0.5625
12.3428	0	530	0	530	0	525	0	525	0	530	0	525	0	530	0	528	0	525	0	525	0	525	0	525	0	525	0	525	0	525	0	525	0	0	526.438	0.5625
12.3539	0	530	0	530	0	525	0	525	0	530	0	525	0	530	0	528	0	525	0	525	0	525	0	525	0	525	0	525	0	525	0	525	0	0	526.438	0.5625
12.3651	0	530	0	530	0	525	0	525	0	530	0	525	0	530	0	528	0	525	0	525	0	525	0	525	0	525	0	525	0	525	0	525	0	0	526.438	0.5625
12.3762	0	530	0	530	0	525	0	525	0	530	0	525	0	530	0	528	0	525	0	525	0	525	0	525	0	525	0	525	0	525	0	525	0	0	526.438	0.5625
12.3874	0	530	0	530	0	525	0	525	0	530	0	525	0	530	0	528	0	525	0	525	0	525	0	525	0	525	0	525	0	525	0	525	0	0	526.438	0.5625
12.3986	0	530	0	530	0	525	0	525	0	530	0	525	0	530	0	528	0	525	0	525	0	525	0	525	0	525	0	525	0	525	0	525	0	0	526.438	0.5625
12.4097	0	530	0	530	0	525	0	525	0	530	0	525	0	530	0	528	0	525	0	525	0	525	0	525	0	525	0	525	0	525	0	525	0	0	526.438	0.5625
12.4209	0	530	0	530	0	525	0	525	0	530	0	525	0	530	0	528	0	525	0	525	0	525	0	525	0	525	0	525	0	525	0	525	0	0	526.438	0.5625
12.432	0	530	0	530	0	525	0	525	0	530	0	525	0	530	0	528	0	525	0	525	0	525	0	525	0	525	0	525	0	525	0	525	0	0	526.438	0.5625
12.4432	0	530	0	530	0	525	0	525	0	530	0	525	0	530	0	528	0	525	0	525	0	525	0	525	0	525	0	525	0	525	0	525	0	0	526.438	0.5625
12.4544	0	530	0	530	0	525	0	525	0	530	0	525	0	530	0	528	0	525	0	525	0	525	0	525	0	525	0	525	0	525	0	525	0	0	526.438	0.5625
12.4655	0	530	0	530	0	525	0	525	0	530	0	525	0	530	0	528	0	525	0	525	0	525	0	525	0	525	0	525	0	525	0	525	0	0	526.438	0.5625
12.4767	0	530	0	530	0	525	0	525	0	530	0	525	0	530	0	528	0	525	0	525	0	525	0	525	0	525	0	525	0	525	0	525	0	0	526.438	0.5625
12.4878	0	530	0	530	0	525	0	525	0	530	0	525	0	530	0	528	0	525	0	525	0	525	0	525	0	525	0	525	0	525	0	525	0	0	526.438	0.5625
12.499	0	530	0	530	0	525	0	525	0	530	0	525	0	530	0	528	0	525	0	525	0	525	0	525	0	525	0	525	0	525	0	525	0	0	526.438	0.5625
12.5102	0	530	0	530	0	525	0	525	0	530	0	525	0	530	0	528	0	525	0	525	0	525	0	525	0	525	0	525	0	525	0	525	0	0	526.438	0.5625
12.5213	0	530	0	530	0	525	0	525	0	530	0	525	0	530	0	528	0	525	0	525	0	525	0	525	0	525	0	525	0	525	0	525	0	0	526.438	0.5625
12.5325	0	530	0	530	0	525	0	525	0	530	0	525	0	530	0	528	0	525	0	525	0	525	0	525	0	525	0	525	0	525	0	525	0	0	526.438	0.5625
12.5436	0	530	0	530	0	525	0	525	0	530	0	525	0	530	0	528	0	525	0	525	0	525	0	525	0	525	0	525	0	525	0	525	0	0	526.438	0.5625
12.5548	0	530	0	530	0	525	0	525	0	530	0	525	0	530	0	528	0	525	0	525	0	525	0	525	0	525	0	525	0	525	0	525	0	0	526.438	0.5625
12.5659	0	530	0	530	0	525	0	525	0	530	0	525	0	530	0	528	0	525	0	525	0	525	0	525	0	525	0	525	0	525	0	525	0	0	526.438	0.5625
12.5771	0	530	0	530	0	525	0	525	0	530	0	525	0	530	0	528	0	525	0	525	0	525	0	525	0	525	0	525	0	525	0	525	0	0	526.438	0.5625
12.5883	0	530	0	530	0	525	0	525	0	530	0	525	0	530	0	528	0	525	0	525	0	525	0	525	0	525	0	525	0	525	0	525	0	0	526.438	0.5625
12.5994	0	530	0	530	0	525	0	525	0	530	0	525	0	530	0	528	0	525	0	525	0	525	0	525	0	525	0	525	0	525	0	525	0	0	526.438	0.5625
12.6106	0	530	0	530	0	525	0	525	0	530	0	525	0	530	0	528	0	525	0	525	0	525	0	525	0	525	0	525	0	525	0	525	0	0	526.438	0.5625
12.6217	0	530	0	530	0	525	0	525	0	530	0	525	0	530	0	528	0	525	0	525	0	525	0	525	0	525	0	525	0	525	0	525	0	0	526.438	0.5625
12.6329	0	530	0	530	0	525	0	525	0	530	0	525	0	530	0	528	0	525	0	525	0	525	0	525	0	525	0	525	0	525	0	525	0	0	526.438	0.5625
12.6441	0	530	0	530	0	525	0	525	0	530	0	525	0	530	0	528	0	525	0	525	0	525	0	525	0	525	0	525	0	525	0	525	0	0	526.438	0.5625
12.6552	0	530	0	530	0	525	0	525	0	530	0	525	0	530	0	528	0	525	0	525	0	525	0	525	0	525	0	525	0	525	0	525	0	0	526.438	0.5625
12.6664	0	530	0	530	0	525	0	525	0	530	0	525	0	530	0	528	0	525	0	525	0	525	0	525	0	525	0	525	0	525	0	525	0	0	526.438	0.5625
12.6775	0	530	0	530	0	525	0	525	0	530	0	525	0	530	0	528	0	525	0	525	0	525	0	525	0	525	0	525	0	525	0	525	0	0	526.438	0.5625
12.6887	0	530	0	530	0	525	0	525	0	530	0	525	0	530	0	528	0	525	0	525	0	525	0	525	0	525	0	525	0	525	0	525	0	0	526.438	0.5625
12.6999	0	530	0	530	0	525	0	525	0	530	0	525	0	530	0	528	0	525	0	525	0	525	0	525	0	525	0	525	0	525	0	525	0	0	526.438	0.5625
12.711	0	530	0	530	0	525	0	525	0	530	0	525	0	530	0	528	0	525	0	525	0	525	0	525	0	525	0	525	0	525	0	525	0	0	526.438	0.5625
12.7222	0	530	0	530	0	525	0	525	0	530	0	525	0	530	0	528	0	525	0	525	0	525	0	525	0	525	0	525	0	525	0	525	0	0	526.438	0.5625
12.7333	0	530	0	530	0	525	0	525	0	530	0	525	0	530	0	528	0	525	0	525	0	525	0	525	0	525	0	525	0	525	0	525	0	0	526.438	0.5625
12.7445	0	530	0	530	0	525	0	525	0	530	0	525	0	530	0	528	0	525	0	525	0	525	0	525	0	525	0	525	0	525	0	525	0	0	526.438	0.5625
12.7557	0	530	0	530	0	525	0	525	0	530	0	525	0	530	0	528	0	525	0	525	0	525	0	525	0	525	0	525	0	525	0	525	0	0	526.438	0.5625
12.7668	0	530	0	530	0	525	0	525	0	530	0	525	0	530	0	528	0	525	0	525	0	525	0	525	0	525	0	525	0	525	0	525	0	0	526.438	0.5625
12.778	0	530	0	530	0	525	0	525	0	530	0	525	0	530	0	528	0	525	0	525	0	525	0	525	0	525	0	525	0	525	0	525	0	0	526.438	0.5625
12.7891	0	530	0	530	0	525	0	525	0	530	0	525	0	530	0	528	0	525	0	525	0	525	0	525	0	525	0	525	0	525	0	525	0	0	526.438	0.5625
12.8003	0	530	0	530	0	525	0	525	0	530	0	525	0	530	0	528	0	525	0	525	0	525	0	525	0	525	0	525	0	525	0	525	0	0	526.438	0.5625
12.8115	0	530	0	530	0	525	0	525	0	530	0	525	0	530	0	528	0	525	0	525	0	525	0	525	0	525	0	525	0	525	0	525	0	0	526.438	0.5625
12.8226	0	530	0	530	0	525	0	525	0	530	0	525	0	530	0	528	0	525	0	525	0	525	0	525	0	525	0	525	0	525	0	525	0	0	526.438	0.5625
12.8338	0	530	0	530	0	525	0	525	0	530	0	525	0	530	0	528	0	525	0	525	0	525	0	525	0	525	0	525	0	525	0	525	0	0	526.438	0.5625
12.8449	0	530	0	530	0	525	0	525	0	530	0	525	0	530	0	528	0	525	0	525	0	525	0	525	0	525	0	525	0	525	0	525	0	0	526.438	0.5625
12.8561	0	530	0	530	0	525	0	525	0	530	0	525	0	530	0	528	0	525	0	525	0	525	0	525	0	525	0	525	0	525	0	525	0	0	526.438	0.5625
12.8673	0	530	0	530	0	525	0	525	0	530	0	525	0	530	0	528	0	525	0	525	0	525	0	525	0	525	0	525	0	525	0	525	0	0	526.438	0.5625
12.8784	0	530	0	530	0	525	0	525	0	530	0	525	0	530	0	528	0	525	0	525	0	525	0	525	0	525	0	525	0	525	0	525	0	0	526.438	0.5625
12.8896	0	530	0	530	0	525	0	525	0	530	0	525	0	530	0	528	0	525	0	525	0	525	0	525	0	525	0	525	0	525	0	525	0	0	526.438	0.5625
12.9007	0	530	0	530	0	525	0	525	0	530	0	525	0	530	0	528	0	525	0	525	0	525	0	525	0	525	0	525	0	525	0	525	0	0	526.438	0.5625
12.9119	0	530	0	530	0	525	0	525	0	530	0	525	0	530	0	528	0	525	0	525	0	525	0	525	0	525	0	525	0	525	0	525	0	0	526.438	0.5625
12.9231	0	530	0	530	0	525	0	525	0	530	0	525	0	530	0	528	0	525	0	525	0	525	0	525	0	525	0	525	0	525	0	525	0	0	526.438	0.5625
12.9342	0	530	0	530	0	525	0	525	0	530	0	525	0	530	0	528	0	525	0	525	0	525	0	525	0	525	0	525	0	525	0	525	0	0	526.438	0.5625
12.9454	0	530	0	530	0	525	0	525	0	530	0	525	0	530	0	528	0	525	0	525	0	525	0	525	0	525	0	525	0	525	0	525	0	0	526.438	0.5625
12.9565	0	530	0	530	0	525	0	525	0	530	0	525	0	530	0	528	0	525	0	525	0	525	0	525	0	525	0	525	0	525	0	525	0	0	526.438	0.5625
12.9677	0	530	0	530	0	525	0	525	0	530	0	525	0	530	0	528	0	525	0	525	0	525	0	525	0	525	0	525	0	525	0	525	0	0	526.438	0.5625
12.9789	0	530	0	530	0	525	0	525	0	530	0	525	0	530	0	528	0	525	0	525	0	525	0	525	0	525	0	525	0	525	0	525	0	0	526.438	0.5625
12.99	0	530	0	530	0	525	0	525	0	530	0	525	0	530	0	528	0	525	0	525	0	525	0	525	0	525	0	525	0	525	0	525	0	0	526.438	0.5625
13.0012	0	530	0	530	0	525	0	525	0	530	0	525	0	530	0	528	0	525	0	525	0	525	0	525	0	525	0	525	0	525	0	525	0	0	526.438	0.5625
13.0123	0	530	0	530	0	525	0	525	0	530	0	525	0	530	0	528	0	525	0	525	0	525	0	525	0	525	0	525	0	525	0	525	0	0	526.438	0.5625
13.0235	0	530	0	530	0	525	0	525	0	530	0	525	0	530	0	528	0	525	0	525	0	525	0	525	0	525	0	525	0	525	0	525	0	0	526.438	0.5625
13.0347	0	530	0	530	0	525	0	525	0	530	0	525	0	530	0	528	0	525	0	525	0	525	0	525	0	525	0	525	0	525	0	525	0	0	526.438	0.5625
13.0458	0	530	0	530	0	525	0	525	0	530	0	525	0	530	0	528	0	525	0	525	0	525	0	525	0	525	0	525	0	525	0	525	0	0	526.438	0.5625
13.057	0	530	0	530	0	525	0	525	0	530	0	525	0	530	0	528	0	525	0	525	0	525	0	525	0	525	0	525	0	525	0	525	0	0	526.438	0.5625
13.0681	0	530	0	530	0	525	0	525	0	530	0	525	0	530	0	528	0	525	0	525	0	525	0	525	0	525	0	525	0	525	0	525	0	0	526.438	0.5625
13.0793	0	530	0	530	0	525	0	525	0	530	0	525	0	530	0	528	0	525	0	525	0	525	0	525	0	525	0	525	0	525	0	525	0	0	526.438	0.5625
13.0905	0	530	0	530	0	525	0	525	0	530	0	525	0	530	0	528	0	525	0	525	0	525	0	525	0	525	0	525	0	525	0	525	0	0	526.438	0.5625
13.1016	0	530	0	530	0	525	0	525	0	530	0	525	0	530	0	528	0	525	0	525	0	525	0	525	0	525	0	525	0	525	0	525	0	0	526.438	0.5625
13.1128	0	530	0	530	0	525	0	525	0	530	0	525	0	530	0	528	0	525	0	525	0	525	0	525	0	525	0	525	0	525	0	525	0	0	526.438	0.5625
13.1239	0	530	0	530	0	525	0	525	0	530	0	525	0	530	0	528	0	525	0	525	0	525	0	525	0	525	0	525	0	525	0	525	0	0	526.438	0.5625
13.1351	0	530	0	530	0	525	0	525	0	530	0	525	0	530	0	528	0	525	0	525	0	525	0	525	0	525	0	525	0	525	0	525	0	0	526.438	0.5625
13.1463	0	530	0	530	0	525	0	525	0	530	0	525	0	530	0	528	0	525	0	525	0	525	0	525	0	525	0	525	0	525	0	525	0	0	526.438	0.5625
13.1574	0	530	0	530	0	525	0	525	0	530	0	525	0	530	0	528	0	525	0	525	0	525	0	525	0	525	0	525	0	525	0	525	0	0	526.438	0.5625
13.1686	0	530	0	530	0	525	0	525	0	530	0	525	0	530	0	528	0	525	0	525	0	525	0	525	0	525	0	525	0	525	0	525	0	0	526.438	0.5625
13.1797	0	530	0	530	0	525	0	525	0	530	0	525	0	530	0	528	0	525	0	525	0	525	0	525	0	525	0	525	0	525	0	525	0	0	526.438	0.5625
13.1909	0	530	0	530	0	525	0	525	0	530	0	525	0	530	0	528	0	525	0	525	0	525	0	525	0	525	0	525	0	525	0	525	0	0	526.438	0.5625
13.2021	0	530	0	530	0	525	0	525	0	530	0	525	0	530	0	528	0	525	0	525	0	525	0	525	0	525	0	525	0	525	0	525	0	0	526.438	0.5625
13.2132	0	530	0	530	0	525	0	525	0	530	0	525	0	530	0	528	0	525	0	525	0	525	0	525	0	525	0	525	0	525	0	525	0	0	526.438	0.5625
13.2244	0	530	0	530	0	525	0	525	0	530	0	525	0	530	0	528	0	525	0	525	0	525	0	525	0	525	0	525	0	525	0	525	0	0	526.438	0.5625
13.2355	0	530	0	530	0	525	0	525	0	530	0	525	0	530	0	528	0	525	0	525	0	525	0	525	0	525	0	525	0	525	0	525	0	0	526.438	0.5625
13.2467	0	530	0	530	0	525	0	525	0	530	0	525	0	530	0	528	0	525	0	525	0	525	0	525	0	525	0	525	0	525	0	525	0	0	526.438	0.5625
13.2579	0	530	0	530	0	525	0	525	0	530	0	525	0	530	0	528	0	525	0	525	0	525	0	525	0	525	0	525	0	525	0	525	0	0	526.438	0.5625
13.269	0	530	0	530	0	525	0	525	0	530	0	525	0	530	0	528	0	525	0	525	0	525	0	525	0	525	0	525	0	525	0	525	0	0	526.438	0.5625
13.2802	0	530	0	530	0	525	0	525	0	530	0	525	0	530	0	528	0	525	0	525	0	525	0	525	0	525	0	525	0	525	0	525	0	0	526.438	0.5625
13.2913	0	530	0	530	0	525	0	525	0	530	0	525	0	530	0	528	0	525	0	525	0	525	0	525	0	525	0	525	0	525	0	525	0	0	526.438	0.5625
13.3025	0	530	0	530	0	525	0	525	0	530	0	525	0	530	0	528	0	525	0	525	0	525	0	525	0	525	0	525	0	525	0	525	0	0	526.438	0.5625
13.3137	0	530	0	530	0	525	0	525	0	530	0	525	0	530	0	528	0	525	0	525	0	525	0	525	0	525	0	525	0	525	0	525	0	0	526.438	0.5625
13.3248	0	530	0	530	0	525	0	525	0	530	0	525	0	530	0	528	0	525	0	525	0	525	0	525	0	525	0	525	0	525	0	525	0	0	526.438	0.5625
13.336	0	530	0	530	0	525	0	525	0	530	0	525	0	530	0	528	0	525	0	525	0	525	0	525	0	525	0	525	0	525	0	525	0	0	526.438	0.5625
13.3471	0	530	0	530	0	525	0	525	0	530	0	525	0	530	0	528	0	525	0	525	0	525	0	525	0	525	0	525	0	525	0	525	0	0	526.438	0.5625
13.3583	0	530	0	530	0	525	0	525	0	530	0	525	0	530	0	528	0	525	0	525	0	525	0	525	0	525	0	525	0	525	0	525	0	0	526.438	0.5625
13.3695	0	530	0	530	0	525	0	525	0	530	0	525	0	530	0	528	0	525	0	525	0	525	0	525	0	525	0	525	0	525	0	525	0	0	526.438	0.5625
13.3806	0	530	0	530	0	525	0	525	0	530	0	525	0	530	0	528	0	525	0	525	0	525	0	525	0	525	0	525	0	525	0	525	0	0	526.438	0.5625
13.3918	0	530	0	530	0	525	0	525	0	530	0	525	0	530	0	528	0	525	0	525	0	525	0	525	0	525	0	525	0	525	0	525	0	0	526.438	0.5625
13.4029	0	530	0	530	0	525	0	525	0	530	0	525	0	530	0	528	0	525	0	525	0	525	0	525	0	525	0	525	0	525	0	525	0	0	526.438	0.5625
13.4141	0	530	0	530	0	525	0	525	0	530	0	525	0	530	0	528	0	525	0	525	0	525	0	525	0	525	0	525	0	525	0	525	0	0	526.438	0.5625
13.4253	0	530	0	530	0	525	0	525	0	530	0	525	0	530	0	528	0	525	0	525	0	525	0	525	0	525	0	525	0	525	0	525	0	0	526.438	0.5625
13.4364	0	530	0	530	0	525	0	525	0	530	0	525	0	530	0	528	0	525	0	525	0	525	0	525	0	525	0	525	0	525	0	525	0	0	526.438	0.5625
13.4476	0	530	0	530	0	525	0	525	0	530	0	525	0	530	0	528	0	525	0	525	0	525	0	525	0	525	0	525	0	525	0	525	0	0	526.438	0.5625
13.4587	0	530	0	530	0	525	0	525	0	530	0	525	0	530	0	528	0	525	0	525	0	525	0	525	0	525	0	525	0	525	0	525	0	0	526.438	0.5625
13.4699	0	530	0	530	0	525	0	525	0	530	0	525	0	530	0	528	0	525	0	525	0	525	0	525	0	525	0	525	0	525	0	525	0	0	526.438	0.5625
13.4811	0	530	0	530	0	525	0	525	0	530	0	525	0	530	0	528	0	525	0	525	0	525	0	525	0	525	0	525	0	525	0	525	0	0	526.438	0.5625
13.4922	0	530	0	530	0	525	0	525	0	530	0	525	0	530	0	528	0	525	0	525	0	525	0	525	0	525	0	525	0	525	0	525	0	0	526.438	0.5625
13.5034	0	530	0	530	0	525	0	525	0	530	0	525	0	530	0	528	0	525	0	525	0	525	0	525	0	525	0	525	0	525	0	525	0	0	526.438	0.5625
13.5145	0	530	0	530	0	525	0	525	0	530	0	525	0	530	0	528	0	525	0	525	0	525	0	525	0	525	0	525	0	525	0	525	0	0	526.438	0.5625
13.5257	0	530	0	530	0	525	0	525	0	530	0	525	0	530	0	528	0	525	0	525	0	525	0	525	0	525	0	525	0	525	0	525	0	0	526.438	0.5625
13.5369	0	530	0	530	0	525	0	525	0	530	0	525	0	530	0	528	0	525	0	525	0	525	0	525	0	525	0	525	0	525	0	525	0	0	526.438	0.5625
13.548	0	530	0	530	0	525	0	525	0	530	0	525	0	530	0	528	0	525	0	525	0	525	0	525	0	525	0	525	0	525	0	525	0	0	526.438	0.5625
13.5592	0	530	0	530	0	525	0	525	0	530	0	525	0	530	0	528	0	525	0	525	0	525	0	525	0	525	0	525	0	525	0	525	0	0	526.438	0.5625
13.5703	0	530	0	530	0	525	0	525	0	530	0	525	0	530	0	528	0	525	0	525	0	525	0	525	0	525	0	525	0	525	0	525	0	0	526.438	0.5625
13.5815	0	530	0	530	0	525	0	525	0	530	0	525	0	530	0	528	0	525	0	525	0	525	0	525	0	525	0	525	0	525	0	525	0	0	526.438	0.5625
13.5927	0	530	0	530	0	525	0	525	0	530	0	525	0	530	0	528	0	525	0	525	0	525	0	525	0	525	0	525	0	525	0	525	0	0	526.438	0.5625
13.6038	0	530	0	530	0	525	0	525	0	530	0	525	0	530	0	528	0	525	0	525	0	525	0	525	0	525	0	525	0	525	0	525	0	0	526.438	0.5625
13.615	0	530	0	530	0	525	0	525	0	530	0	525	0	530	0	528	0	525	0	525	0	525	0	525	0	525	0	525	0	525	0	525	0	0	526.438	0.5625
13.6261	0	530	0	530	0	525	0	525	0	530	0	525	0	530	0	528	0	525	0	525	0	525	0	525	0	525	0	525	0	525	0	525	0	0	526.438	0.5625
13.6373	0	530	0	530	0	525	0	525	0	530	0	525	0	530	0	528	0	525	0	525	0	525	0	525	0	525	0	525	0	525	0	525	0	0	526.438	0.5625
13.6485	0	530	0	530	0	525	0	525	0	530	0	525	0	530	0	528	0	525	0	525	0	525	0	525	0	525	0	525	0	525	0	525	0	0	526.438	0.5625
13.6596	0	530	0	530	0	525	0	525	0	530	0	525	0	530	0	528	0	525	0	525	0	525	0	525	0	525	0	525	0	525	0	525	0	0	526.438	0.5625
13.6708	0	530	0	530	0	525	0	525	0	530	0	525	0	530	0	528	0	525	0	525	0	525	0	525	0	525	0	525	0	525	0	525	0	0	526.438	0.5625
13.6819	0	530	0	530	0	525	0	525	0	530	0	525	0	530	0	528	0	525	0	525	0	525	0	525	0	525	0	525	0	525	0	525	0	0	526.438	0.5625
13.6931	0	530	0	530	0	525	0	525	0	530	0	525	0	530	0	528	0	525	0	525	0	525	0	525	0	525	0	525	0	525	0	525	0	0	526.438	0.5625
13.7043	0	530	0	530	0	525	0	525	0	530	0	525	0	530	0	528	0	525	0	525	0	525	0	525	0	525	0	525	0	525	0	525	0	0	526.438	0.5625
13.7154	0	530	0	530	0	525	0	525	0	530	0	525	0	530	0	528	0	525	0	525	0	525	0	525	0	525	0	525	0	525	0	525	0	0	526.438	0.5625
13.7266	0	530	0	530	0	525	0	525	0	530	0	525	0	530	0	528	0	525	0	525	0	525	0	525	0	525	0	525	0	525	0	525	0	0	526.438	0.5625
13.7377	0	530	0	530	0	525	0	525	0	530	0	525	0	530	0	528	0	525	0	525	0	525	0	525	0	525	0	525	0	525	0	525	0	0	526.438	0.5625
13.7489	0	530	0	530	0	525	0	525	0	530	0	525	0	530	0	528	0	525	0	525	0	525	0	525	0	525	0	525	0	525	0	525	0	0	526.438	0.5625
13.76	0	530	0	530	0	525	0	525	0	530	0	525	0	530	0	528	0	525	0	525	0	525	0	525	0	525	0	525	0	525	0	525	0	0	526.438	0.5625
13.7712	0	530	0	530	0	525	0	525	0	530	0	525	0	530	0	528	0	525	0	525	0	525	0	525	0	525	0	525	0	525	0	525	0	0	526.438	0.5625
13.7824	0	530	0	530	0	525	0	525	0	530	0	525	0	530	0	528	0	525	0	525	0	525	0	525	0	525	0	525	0	525	0	525	0	0	526.438	0.5625
13.7935	0	530	0	530	0	525	0	525	0	530	0	525	0	530	0	528	0	525	0	525	0	525	0	525	0	525	0	525	0	525	0	525	0	0	526.438	0.5625
13.8047	0	530	0	530	0	525	0	525	0	530	0	525	0	530	0	528	0	525	0	525	0	525	0	525	0	525	0	525	0	525	0	525	0	0	526.438	0.5625
13.8158	0	530	0	530	0	525	0	525	0	530	0	525	0	530	0	528	0	525	0	525	0	525	0	525	0	525	0	525	0	525	0	525	0	0	526.438	0.5625
13.827	0	530	0	530	0	525	0	525	0	530	0	525	0	530	0	528	0	525	0	525	0	525	0	525	0	525	0	525	0	525	0	525	0	0	526.438	0.5625
13.8382	0	530	0	530	0	525	0	525	0	530	0	525	0	530	0	528	0	525	0	525	0	525	0	525	0	525	0	525	0	525	0	525	0	0	526.438	0.5625
13.8493	0	530	0	530	0	525	0	525	0	530	0	525	0	530	0	528	0	525	0	525	0	525	0	525	0	525	0	525	0	525	0	525	0	0	526.438	0.5625
13.8605	0	530	0	530	0	525	0	525	0	530	0	525	0	530	0	528	0	525	0	525	0	525	0	525	0	525	0	525	0	525	0	525	0	0	526.438	0.5625
13.8716	0	530	0	530	0	525	0	525	0	530	0	525	0	530	0	528	0	525	0	525	0	525	0	525	0	525	0	525	0	525	0	525	0	0	526.438	0.5625
13.8828	0	530	0	530	0	525	0	525	0	530	0	525	0	530	0	528	0	525	0	525	0	525	0	525	0	525	0	525	0	525	0	525	0	0	526.438	0.5625
13.894	0	530	0	530	0	525	0	525	0	530	0	525	0	530	0	528	0	525	0	525	0	525	0	525	0	525	0	525	0	525	0	525	0	0	526.438	0.5625
13.9051	0	530	0	530	0	525	0	525	0	530	0	525	0	530	0	528	0	525	0	525	0	525	0	525	0	525	0	525	0	525	0	525	0	0	526.438	0.5625
13.9163	0	530	0	530	0	525	0	525	0	530	0	525	0	530	0	528	0	525	0	525	0	525	0	525	0	525	0	525	0	525	0	525	0	0	526.438	0.5625
13.9274	0	530	0	530	0	525	0	525	0	530	0	525	0	530	0	528	0	525	0	525	0	525	0	525	0	525	0	525	0	525	0	525	0	0	526.438	0.5625
13.9386	0	530	0	530	0	525	0	525	0	530	0	525	0	530	0	528	0	525	0	525	0	525	0	525	0	525	0	525	0	525	0	525	0	0	526.438	0.5625
13.9498	0	530	0	530	0	525	0	525	0	530	0	525	0	530	0	528	0	525	0	525	0	525	0	525	0	525	0	525	0	525	0	525	0	0	526.438	0.5625
13.9609	0	530	0	530	0	525	0	525	0	530	0	525	0	530	0	528	0	525	0	525	0	525	0	525	0	525	0	525	0	525	0	525	0	0	526.438	0.5625
13.9721	0	530	0	530	0	525	0	525	0	530	0	525	0	530	0	528	0	525	0	525	0	525	0	525	0	525	0	525	0	525	0	525	0	0	526.438	0.5625
13.9832	0	530	0	530	0	525	0	525	0	530	0	525	0	530	0	528	0	525	0	525	0	525	0	525	0	525	0	525	0	525	0	525	0	0	526.438	0.5625
13.9944	0	530	0	530	0	525	0	525	0	530	0	525	0	530	0	528	0	525	0	525	0	525	0	525	0	525	0	525	0	525	0	525	0	0	526.438	0.5625
14.0056	0	530	0	530	0	525	0	525	0	530	0	525	0	530	0	528	0	525	0	525	0	525	0	525	0	525	0	525	0	525	0	525	0	0	526.438	0.5625
14.0167	0	530	0	530	0	525	0	525	0	530	0	525	0	530	0	528	0	525	0	525	0	525	0	525	0	525	0	525	0	525	0	525	0	0	526.438	0.5625
14.0279	0	530	0	530	0	525	0	525	0	530	0	525	0	530	0	528	0	525	0	525	0	525	0	525	0	525	0	525	0	525	0	525	0	0	526.438	0.5625
14.039	0	530	0	530	0	525	0	525	0	530	0	525	0	530	0	528	0	525	0	525	0	525	0	525	0	525	0	525	0	525	0	525	0	0	526.438	0.5625
14.0502	0	530	0	530	0	525	0	525	0	530	0	525	0	530	0	528	0	525	0	525	0	525	0	525	0	525	0	525	0	525	0	525	0	0	526.438	0.5625
14.0614	0	530	0	530	0	525	0	525	0	530	0	525	0	530	0	528	0	525	0	525	0	525	0	525	0	525	0	525	0	525	0	525	0	0	526.438	0.5625
14.0725	0	530	0	530	0	525	0	525	0	530	0	525	0	530	0	528	0	525	0	525	0	525	0	525	0	525	0	525	0	525	0	525	0	0	526.438	0.5625
14.0837	0	530	0	530	0	525	0	525	0	530	0	525	0	530	0	528	0	525	0	525	0	525	0	525	0	525	0	525	0	525	0	525	0	0	526.438	0.5625
14.0948	0	530	0	530	0	525	0	525	0	530	0	525	0	530	0	528	0	525	0	525	0	525	0	525	0	525	0	525	0	525	0	525	0	0	526.438	0.5625
14.106	0	530	0	530	0	525	0	525	0	530	0	525	0	530	0	528	0	525	0	525	0	525	0	525	0	525	0	525	0	525	0	525	0	0	526.438	0.5625
14.1172	0	530	0	530	0	525	0	525	0	530	0	525	0	530	0	528	0	525	0	525	0	525	0	525	0	525	0	525	0	525	0	525	0	0	526.438	0.5625
14.1283	0	530	0	530	0	525	0	525	0	530	0	525	0	530	0	528	0	525	0	525	0	525	0	525	0	525	0	525	0	525	0	525	0	0	526.438	0.5625
14.1395	0	530	0	530	0	525	0	525	0	530	0	525	0	530	0	528	0	525	0	525	0	525	0	525	0	525	0	525	0	525	0	525	0	0	526.438	0.5625
14.1506	0	530	0	530	0	525	0	525	0	530	0	525	0	530	0	528	0	525	0	525	0	525	0	525	0	525	0	525	0	525	0	525	0	0	526.438	0.5625
14.1618	0	530	0	530	0	525	0	525	0	530	0	525	0	530	0	528	0	525	0	525	0	525	0	525	0	525	0	525	0	525	0	525	0	0	526.438	0.5625
14.173	0	530	0	530	0	525	0	525	0	530	0	525	0	530	0	528	0	525	0	525	0	525	0	525	0	525	0	525	0	525	0	525	0	0	526.438	0.5625
14.1841	0	530	0	530	0	525	0	525	0	530	0	525	0	530	0	528	0	525	0	525	0	525	0	525	0	525	0	525	0	525	0	525	0	0	526.438	0.5625
14.1953	0	530	0	530	0	525	0	525	0	530	0	525	0	530	0	528	0	525	0	525	0	525	0	525	0	525	0	525	0	525	0	525	0	0	526.438	0.5625
14.2064	0	530	0	530	0	525	0	525	0	530	0	525	0	530	0	528	0	525	0	525	0	525	0	525	0	525	0	525	0	525	0	525	0	0	526.438	0.5625
14.2176	0	530	0	530	0	525	0	525	0	530	0	525	0	530	0	528	0	525	0	525	0	525	0	525	0	525	0	525	0	525	0	525	0	0	526.438	0.5625
14.2288	0	530	0	530	0	525	0	525	0	530	0	525	0	530	0	528	0	525	0	525	0	525	0	525	0	525	0	525	0	525	0	525	0	0	526.438	0.5625
14.2399	0	530	0	530	0	525	0	525	0	530	0	525	0	530	0	528	0	525	0	525	0	525	0	525	0	525	0	525	0	525	0	525	0	0	526.438	0.5625
14.2511	0	530	0	530	0	525	0	525	0	530	0	525	0	530	0	528	0	525	0	525	0	525	0	525	0	525	0	525	0	525	0	525	0	0	526.438	0.5625
14.2622	0	530	0	530	0	525	0	525	0	530	0	525	0	530	0	528	0	525	0	525	0	525	0	525	0	525	0	525	0	525	0	525	0	0	526.438	0.5625
14.2734	0	530	0	530	0	525	0	525	0	530	0	525	0	530	0	528	0	525	0	525	0	525	0	525	0	525	0	525	0	525	0	525	0	0	526.438	0.5625
14.2846	0	530	0	530	0	525	0	525	0	530	0	525	0	530	0	528	0	525	0	525	0	525	0	525	0	525	0	525	0	525	0	525	0	0	526.438	0.5625
14.2957	0	530	0	530	0	525	0	525	0	530	0	525	0	530	0	528	0	525	0	525	0	525	0	525	0	525	0	525	0	525	0	525	0	0	526.438	0.5625
14.3069	0	530	0	530	0	525	0	525	0	530	0	525	0	530	0	528	0	525	0	525	0	525	0	525	0	525	0	525	0	525	0	525	0	0	526.438	0.5625
14.318	0	530	0	530	0	525	0	525	0	530	0	525	0	530	0	528	0	525	0	525	0	525	0	525	0	525	0	525	0	525	0	525	0	0	526.438	0.5625
14.3292	0	530	0	530	0	525	0	525	0	530	0	525	0	530	0	528	0	525	0	525	0	525	0	525	0	525	0	525	0	525	0	525	0	0	526.438	0.5625
14.3404	0	530	0	530	0	525	0	525	0	530	0	525	0	530	0	528	0	525	0	525	0	525	0	525	0	525	0	525	0	525	0	525	0	0	526.438	0.5625
14.3515	0	530	0	530	0	525	0	525	0	530	0	525	0	530	0	528	0	525	0	525	0	525	0	525	0	525	0	525	0	525	0	525	0	0	526.438	0.5625
14.3627	0	530	0	530	0	525	0	525	0	530	0	525	0	530	0	528	0	525	0	525	0	525	0	525	0	525	0	525	0	525	0	525	0	0	526.438	0.5625
14.3738	0	530	0	530	0	525	0	525	0	530	0	525	0	530	0	528	0	525	0	525	0	525	0	525	0	525	0	525	0	525	0	525	0	0	526.438	0.5625
14.385	0	530	0	530	0	525	0	525	0	530	0	525	0	530	0	528	0	525	0	525	0	525	0	525	0	525	0	525	0	525	0	525	0	0	526.438	0.5625
14.3962	0	530	0	530	0	525	0	525	0	530	0	525	0	530	0	528	0	525	0	525	0	525	0	525	0	525	0	525	0	525	0	525	0	0	526.438	0.5625
14.4073	0	530	0	530	0	525	0	525	0	530	0	525	0	530	0	528	0	525	0	525	0	525	0	525	0	525	0	525	0	525	0	525	0	0	526.438	0.5625
14.4185	0	530	0	530	0	525	0	525	0	530	0	525	0	530	0	528	0	525	0	525	0	525	0	525	0	525	0	525	0	525	0	525	0	0	526.438	0.5625
14.4296	0	530	0	530	0	525	0	525	0	530	0	525	0	530	0	528	0	525	0	525	0	525	0	525	0	525	0	525	0	525	0	525	0	0	526.438	0.5625
14.4408	0	530	0	530	0	525	0	525	0	530	0	525	0	530	0	528	0	525	0	525	0	525	0	525	0	525	0	525	0	525	0	525	0	0	526.438	0.5625
14.452	0	530	0	530	0	525	0	525	0	530	0	525	0	530	0	528	0	525	0	525	0	525	0	525	0	525	0	525	0	525	0	525	0	0	526.438	0.5625
14.4631	0	530	0	530	0	525	0	525	0	530	0	525	0	530	0	528	0	525	0	525	0	525	0	525	0	525	0	525	0	525	0	525	0	0	526.438	0.5625
14.4743	0	530	0	530	0	525	0	525	0	530	0	525	0	530	0	528	0	525	0	525	0	525	0	525	0	525	0	525	0	525	0	525	0	0	526.438	0.5625
14.4854	0	530	0	530	0	525	0	525	0	530	0	525	0	530	0	528	0	525	0	525	0	525	0	525	0	525	0	525	0	525	0	525	0	0	526.438	0.5625
14.4966	0	530	0	530	0	525	0	525	0	530	0	525	0	530	0	528	0	525	0	525	0	525	0	525	0	525	0	525	0	525	0	525	0	0	526.438	0.5625
14.5078	0	530	0	530	0	525	0	525	0	530	0	525	0	530	0	528	0	525	0	525	0	525	0	525	0	525	0	525	0	525	0	525	0	0	526.438	0.5625
14.5189	0	530	0	530	0	525	0	525	0	530	0	525	0	530	0	528	0	525	0	525	0	525	0	525	0	525	0	525	0	525	0	525	0	0	526.438	0.5625
14.5301	0	530	0	530	0	525	0	525	0	530	0	525	0	530	0	528	0	525	0	525	0	525	0	525	0	525	0	525	0	525	0	525	0	0	526.438	0.5625
14.5412	0	530	0	530	0	525	0	525	0	530	0	525	0	530	0	528	0	525	0	525	0	525	0	525	0	525	0	525	0	525	0	525	0	0	526.438	0.5625
14.5524	0	530	0	530	0	525	0	525	0	530	0	525	0	530	0	528	0	525	0	525	0	525	0	525	0	525	0	525	0	525	0	525	0	0	526.438	0.5625
14.5636	0	530	0	530	0	525	0	525	0	530	0	525	0	530	0	528	0	525	0	525	0	525	0	525	0	525	0	525	0	525	0	525	0	0	526.438	0.5625
14.5747	0	530	0	530	0	525	0	525	0	530	0	525	0	530	0	528	0	525	0	525	0	525	0	525	0	525	0	525	0	525	0	525	0	0	526.438	0.5625
14.5859	0	530	0	530	0	525	0	525	0	530	0	525	0	530	0	528	0	525	0	525	0	525	0	525	0	525	0	525	0	525	0	525	0	0	526.438	0.5625
14.597	0	530	0	530	0	525	0	525	0	530	0	525	0	530	0	528	0	525	0	525	0	525	0	525	0	525	0	525	0	525	0	525	0	0	526.438	0.5625
14.6082	0	530	0	530	0	525	0	525	0	530	0	525	0	530	0	528	0	525	0	525	0	525	0	525	0	525	0	525	0	525	0	525	0	0	526.438	0.5625
14.6194	0	530	0	530	0	525	0	525	0	530	0	525	0	530	0	528	0	525	0	525	0	525	0	525	0	525	0	525	0	525	0	525	0	0	526.438	0.5625
14.6305	0	530	0	530	0	525	0	525	0	530	0	525	0	530	0	528	0	525	0	525	0	525	0	525	0	525	0	525	0	525	0	525	0	0	526.438	0.5625
14.6417	0	530	0	530	0	525	0	525	0	530	0	525	0	530	0	528	0	525	0	525	0	525	0	525	0	525	0	525	0	525	0	525	0	0	526.438	0.5625
14.6528	0	530	0	530	0	525	0	525	0	530	0	525	0	530	0	528	0	525	0	525	0	525	0	525	0	525	0	525	0	525	0	525	0	0	526.438	0.5625
14.664	0	530	0	530	0	525	0	525	0	530	0	525	0	530	0	528	0	525	0	525	0	525	0	525	0	525	0	525	0	525	0	525	0	0	526.438	0.5625
14.6752	0	530	0	530	0	525	0	525	0	530	0	525	0	530	0	528	0	525	0	525	0	525	0	525	0	525	0	525	0	525	0	525	0	0	526.438	0.5625
14.6863	0	530	0	530	0	525	0	525	0	530	0	525	0	530	0	528	0	525	0	525	0	525	0	525	0	525	0	525	0	525	0	525	0	0	526.438	0.5625
14.6975	0	530	0	530	0	525	0	525	0	530	0	525	0	530	0	528	0	525	0	525	0	525	0	525	0	525	0	525	0	525	0	525	0	0	526.438	0.5625
14.7086	0	530	0	530	0	525	0	525	0	530	0	525	0	530	0	528	0	525	0	525	0	525	0	525	0	525	0	525	0	525	0	525	0	0	526.438	0.5625
14.7198	0	530	0	530	0	525	0	525	0	530	0	525	0	530	0	528	0	525	0	525	0	525	0	525	0	525	0	525	0	525	0	525	0	0	526.438	0.5625
14.731	0	530	0	530	0	525	0	525	0	530	0	525	0	530	0	528	0	525	0	525	0	525	0	525	0	525	0	525	0	525	0	525	0	0	526.438	0.5625
14.7421	0	530	0	530	0	525	0	525	0	530	0	525	0	530	0	528	0	525	0	525	0	525	0	525	0	525	0	525	0	525	0	525	0	0	526.438	0.5625
14.7533	0	530	0	530	0	525	0	525	0	530	0	525	0	530	0	528	0	525	0	525	0	525	0	525	0	525	0	525	0	525	0	525	0	0	526.438	0.5625
14.7644	0	530	0	530	0	525	0	525	0	530	0	525	0	530	0	528	0	525	0	525	0	525	0	525	0	525	0	525	0	525	0	525	0	0	526.438	0.5625
14.7756	0	530	0	530	0	525	0	525	0	530	0	525	0	530	0	528	0	525	0	525	0	525	0	525	0	525	0	525	0	525	0	525	0	0	526.438	0.5625
14.7868	0	530	0	530	0	525	0	525	0	530	0	525	0	530	0	528	0	525	0	525	0	525	0	525	0	525	0	525	0	525	0	525	0	0	526.438	0.5625
14.7979	0	530	0	530	0	525	0	525	0	530	0	525	0	530	0	528	0	525	0	525	0	525	0	525	0	525	0	525	0	525	0	525	0	0	526.438	0.5625
14.8091	0	530	0	530	0	525	0	525	0	530	0	525	0	530	0	528	0	525	0	525	0	525	0	525	0	525	0	525	0	525	0	525	0	0	526.438	0.5625
14.8202	0	530	0	530	0	525	0	525	0	530	0	525	0	530	0	528	0	525	0	525	0	525	0	525	0	525	0	525	0	525	0	525	0	0	526.438	0.5625
14.8314	0	530	0	530	0	525	0	525	0	530	0	525	0	530	0	528	0	525	0	525	0	525	0	525	0	525	0	525	0	525	0	525	0	0	526.438	0.5625
14.8426	0	530	0	530	0	525	0	525	0	530	0	525	0	530	0	528	0	525	0	525	0	525	0	525	0	525	0	525	0	525	0	525	0	0	526.438	0.5625
14.8537	0	530	0	530	0	525	0	525	0	530	0	525	0	530	0	528	0	525	0	525	0	525	0	525	0	525	0	525	0	525	0	525	0	0	526.438	0.5625
14.8649	0	530	0	530	0	525	0	525	0	530	0	525	0	530	0	528	0	525	0	525	0	525	0	525	0	525	0	525	0	525	0	525	0	0	526.438	0.5625
14.876	0	530	0	530	0	525	0	525	0	530	0	525	0	530	0	528	0	525	0	525	0	525	0	525	0	525	0	525	0	525	0	525	0	0	526.438	0.5625
14.8872	0	530	0	530	0	525	0	525	0	530	0	525	0	530	0	528	0	525	0	525	0	525	0	525	0	525	0	525	0	525	0	525	0	0	526.438	0.5625
14.8984	0	530	0	530	0	525	0	525	0	530	0	525	0	530	0	528	0	525	0	525	0	525	0	525	0	525	0	525	0	525	0	525	0	0	526.438	0.5625
14.9095	0	530	0	530	0	525	0	525	0	530	0	525	0	530	0	528	0	525	0	525	0	525	0	525	0	525	0	525	0	525	0	525	0	0	526.438	0.5625
14.9207	0	530	0	530	0	525	0	525	0	530	0	525	0	530	0	528	0	525	0	525	0	525	0	525	0	525	0	525	0	525	0	525	0	0	526.438	0.5625
14.9318	0	530	0	530	0	525	0	525	0	530	0	525	0	530	0	528	0	525	0	525	0	525	0	525	0	525	0	525	0	525	0	525	0	0	526.438	0.5625
14.943	0	530	0	530	0	525	0	525	0	530	0	525	0	530	0	528	0	525	0	525	0	525	0	525	0	525	0	525	0	525	0	525	0	0	526.438	0.5625
14.9541	0	530	0	530	0	525	0	525	0	530	0	525	0	530	0	528	0	525	0	525	0	525	0	525	0	525	0	525	0	525	0	525	0	0	526.438	0.5625
14.9653	0	530	0	530	0	525	0	525	0	530	0	525	0	530	0	528	0	525	0	525	0	525	0	525	0	525	0	525	0	525	0	525	0	0	526.438	0.5625
14.9765	0	530	0	530	0	525	0	525	0	530	0	525	0	530	0	528	0	525	0	525	0	525	0	525	0	525	0	525	0	525	0	525	0	0	526.438	0.5625
14.9876	0	530	0	530	0	525	0	525	0	530	0	525	0	530	0	528	0	525	0	525	0	525	0	525	0	525	0	525	0	525	0	525	0	0	526.438	0.5625
14.9988	0	530	0	530	0	525	0	525	0	530	0	525	0	530	0	528	0	525	0	525	0	525	0	525	0	525	0	525	0	525	0	525	0	0	526.438	0.5625
15.0099	0	530	0	530	0	525	0	525	0	530	0	525	0	530	0	528	0	525	0	525	0	525	0	525	0	525	0	525	0	525	0	525	0	0	526.438	0.5625
15.0211	0	530	0	530	0	525	0	525	0	530	0	525	0	530	0	528	0	525	0	525	0	525	0	525	0	525	0	525	0	525	0	525	0	0	526.438	0.5625
15.0323	0	530	0	530	0	525	0	525	0	530	0	525	0	530	0	528	0	525	0	525	0	525	0	525	0	525	0	525	0	525	0	525	0	0	526.438	0.5625
15.0434	0	530	0	530	0	525	0	525	0	530	0	525	0	530	0	528	0	525	0	525	0	525	0	525	0	525	0	525	0	525	0	525	0	0	526.438	0.5625
15.0546	0	530	0	530	0	525	0	525	0	530	0	525	0	530	0	528	0	525	0	525	0	525	0	525	0	525	0	525	0	525	0	525	0	0	526.438	0.5625
15.0657	0	530	0	530	0	525	0	525	0	530	0	525	0	530	0	528	0	525	0	525	0	525	0	525	0	525	0	525	0	525	0	525	0	0	526.438	0.5625
15.0769	0	530	0	530	0	525	0	525	0	530	0	525	0	530	0	528	0	525	0	525	0	525	0	525	0	525	0	525	0	525	0	525	0	0	526.438	0.5625
15.0881	0	530	0	530	0	525	0	525	0	530	0	525	0	530	0	528	0	525	0	525	0	525	0	525	0	525	0	525	0	525	0	525	0	0	526.438	0.5625
15.0992	0	530	0	530	0	525	0	525	0	530	0	525	0	530	0	528	0	525	0	525	0	525	0	525	0	525	0	525	0	525	0	525	0	0	526.438	0.5625
15.1104	0	530	0	530	0	525	0	525	0	530	0	525	0	530	0	528	0	525	0	525	0	525	0	525	0	525	0	525	0	525	0	525	0	0	526.438	0.5625
15.1215	0	530	0	530	0	525	0	525	0	530	0	525	0	530	0	528	0	525	0	525	0	525	0	525	0	525	0	525	0	525	0	525	0	0	526.438	0.5625
15.1327	0	530	0	530	0	525	0	525	0	530	0	525	0	530	0	528	0	525	0	525	0	525	0	525	0	525	0	525	0	525	0	525	0	0	526.438	0.5625
15.1439	0	530	0	530	0	525	0	525	0	530	0	525	0	530	0	528	0	525	0	525	0	525	0	525	0	525	0	525	0	525	0	525	0	0	526.438	0.5625
15.155	0	530	0	530	0	525	0	525	0	530	0	525	0	530	0	528	0	525	0	525	0	525	0	525	0	525	0	525	0	525	0	525	0	0	526.438	0.5625
15.1662	0	530	0	530	0	525	0	525	0	530	0	525	0	530	0	528	0	525	0	525	0	525	0	525	0	525	0	525	0	525	0	525	0	0	526.438	0.5625
15.1773	0	530	0	530	0	525	0	525	0	530	0	525	0	530	0	528	0	525	0	525	0	525	0	525	0	525	0	525	0	525	0	525	0	0	526.438	0.5625
15.1885	0	530	0	530	0	525	0	525	0	530	0	525	0	530	0	528	0	525	0	525	0	525	0	525	0	525	0	525	0	525	0	525	0	0	526.438	0.5625
15.1997	0	530	0	530	0	525	0	525	0	530	0	525	0	530	0	528	0	525	0	525	0	525	0	525	0	525	0	525	0	525	0	525	0	0	526.438	0.5625
15.2108	0	530	0	530	0	525	0	525	0	530	0	525	0	530	0	528	0	525	0	525	0	525	0	525	0	525	0	525	0	525	0	525	0	0	526.438	0.5625
15.222	0	530	0	530	0	525	0	525	0	530	0	525	0	530	0	528	0	525	0	525	0	525	0	525	0	525	0	525	0	525	0	525	0	0	526.438	0.5625
15.2331	0	530	0	530	0	525	0	525	0	530	0	525	0	530	0	528	0	525	0	525	0	525	0	525	0	525	0	525	0	525	0	525	0	0	526.438	0.5625
15.2443	0	530	0	530	0	525	0	525	0	530	0	525	0	530	0	528	0	525	0	525	0	525	0	525	0	525	0	525	0	525	0	525	0	0	526.438	0.5625
15.2555	0	530	0	530	0	525	0	525	0	530	0	525	0	530	0	528	0	525	0	525	0	525	0	525	0	525	0	525	0	525	0	525	0	0	526.438	0.5625
15.2666	0	530	0	530	0	525	0	525	0	530	0	525	0	530	0	528	0	525	0	525	0	525	0	525	0	525	0	525	0	525	0	525	0	0	526.438	0.5625
15.2778	0	530	0	530	0	525	0	525	0	530	0	525	0	530	0	528	0	525	0	525	0	525	0	525	0	525	0	525	0	525	0	525	0	0	526.438	0.5625
15.2889	0	530	0	530	0	525	0	525	0	530	0	525	0	530	0	528	0	525	0	525	0	525	0	525	0	525	0	525	0	525	0	525	0	0	526.438	0.5625
15.3001	0	530	0	530	0	525	0	525	0	530	0	525	0	530	0	528	0	525	0	525	0	525	0	525	0	525	0	525	0	525	0	525	0	0	526.438	0.5625
15.3113	0	530	0	530	0	525	0	525	0	530	0	525	0	530	0	528	0	525	0	525	0	525	0	525	0	525	0	525	0	525	0	525	0	0	526.438	0.5625
15.3224	0	530	0	530	0	525	0	525	0	530	0	525	0	530	0	528	0	525	0	525	0	525	0	525	0	525	0	525	0	525	0	525	0	0	526.438	0.5625
15.3336	0	530	0	530	0	525	0	525	0	530	0	525	0	530	0	528	0	525	0	525	0	525	0	525	0	525	0	525	0	525	0	525	0	0	526.438	0.5625
15.3447	0	530	0	530	0	525	0	525	0	530	0	525	0	530	0	528	0	525	0	525	0	525	0	525	0	525	0	525	0	525	0	525	0	0	526.438	0.5625
15.3559	0	530	0	530	0	525	0	525	0	530	0	525	0	530	0	528	0	525	0	525	0	525	0	525	0	525	0	525	0	525	0	525	0	0	526.438	0.5625
15.3671	0	530	0	530	0	525	0	525	0	530	0	525	0	530	0	528	0	525	0	525	0	525	0	525	0	525	0	525	0	525	0	525	0	0	526.438	0.5625
15.3782	0	530	0	530	0	525	0	525	0	530	0	525	0	530	0	528	0	525	0	525	0	525	0	525	0	525	0	525	0	525	0	525	0	0	526.438	0.5625
15.3894	0	530	0	530	0	525	0	525	0	530	0	525	0	530	0	528	0	525	0	525	0	525	0	525	0	525	0	525	0	525	0	525	0	0	526.438	0.5625
15.4005	0	530	0	530	0	525	0	525	0	530	0	525	0	530	0	528	0	525	0	525	0	525	0	525	0	525	0	525	0	525	0	525	0	0	526.438	0.5625
15.4117	0	530	0	530	0	525	0	525	0	530	0	525	0	530	0	528	0	525	0	525	0	525	0	525	0	525	0	525	0	525	0	525	0	0	526.438	0.5625
15.4229	0	530	0	530	0	525	0	525	0	530	0	525	0	530	0	528	0	525	0	525	0	525	0	525	0	525	0	525	0	525	0	525	0	0	526.438	0.5625
15.434	0	530	0	530	0	525	0	525	0	530	0	525	0	530	0	528	0	525	0	525	0	525	0	525	0	525	0	525	0	525	0	525	0	0	526.438	0.5625
15.4452	0	530	0	530	0	525	0	525	0	530	0	525	0	530	0	528	0	525	0	525	0	525	0	525	0	525	0	525	0	525	0	525	0	0	526.438	0.5625
15.4563	0	530	0	530	0	525	0	525	0	530	0	525	0	530	0	528	0	525	0	525	0	525	0	525	0	525	0	525	0	525	0	525	0	0	526.438	0.5625
15.4675	0	530	0	530	0	525	0	525	0	530	0	525	0	530	0	528	0	525	0	525	0	525	0	525	0	525	0	525	0	525	0	525	0	0	526.438	0.5625
15.4787	0	530	0	530	0	525	0	525	0	530	0	525	0	530	0	528	0	525	0	525	0	525	0	525	0	525	0	525	0	525	0	525	0	0	526.438	0.5625
15.4898	0	530	0	530	0	525	0	525	0	530	0	525	0	530	0	528	0	525	0	525	0	525	0	525	0	525	0	525	0	525	0	525	0	0	526.438	0.5625
15.501	0	530	0	530	0	525	0	525	0	530	0	525	0	530	0	528	0	525	0	525	0	525	0	525	0	525	0	525	0	525	0	525	0	0	526.438	0.5625
15.5121	0	530	0	530	0	525	0	525	0	530	0	525	0	530	0	528	0	525	0	525	0	525	0	525	0	525	0	525	0	525	0	525	0	0	526.438	0.5625
15.5233	0	530	0	530	0	525	0	525	0	530	0	525	0	530	0	528	0	525	0	525	0	525	0	525	0	525	0	525	0	525	0	525	0	0	526.438	0.5625
15.5345	0	530	0	530	0	525	0	525	0	530	0	525	0	530	0	528	0	525	0	525	0	525	0	525	0	525	0	525	0	525	0	525	0	0	526.438	0.5625
15.5456	0	530	0	530	0	525	0	525	0	530	0	525	0	530	0	528	0	525	0	525	0	525	0	525	0	525	0	525	0	525	0	525	0	0	526.438	0.5625
15.5568	0	530	0	530	0	525	0	525	0	530	0	525	0	530	0	528	0	525	0	525	0	525	0	525	0	525	0	525	0	525	0	525	0	0	526.438	0.5625
15.5679	0	530	0	530	0	525	0	525	0	530	0	525	0	530	0	528	0	525	0	525	0	525	0	525	0	525	0	525	0	525	0	525	0	0	526.438	0.5625
15.5791	0	530	0	530	0	525	0	525	0	530	0	525	0	530	0	528	0	525	0	525	0	525	0	525	0	525	0	525	0	525	0	525	0	0	526.438	0.5625
15.5903	0	530	0	530	0	525	0	525	0	530	0	525	0	530	0	528	0	525	0	525	0	525	0	525	0	525	0	525	0	525	0	525	0	0	526.438	0.5625
15.6014	0	530	0	530	0	525	0	525	0	530	0	525	0	530	0	528	0	525	0	525	0	525	0	525	0	525	0	525	0	525	0	525	0	0	526.438	0.5625
15.6126	0	530	0	530	0	525	0	525	0	530	0	525	0	530	0	528	0	525	0	525	0	525	0	525	0	525	0	525	0	525	0	525	0	0	526.438	0.5625
15.6237	0	530	0	530	0	525	0	525	0	530	0	525	0	530	0	528	0	525	0	525	0	525	0	525	0	525	0	525	0	525	0	525	0	0	526.438	0.5625
15.6349	0	530	0	530	0	525	0	525	0	530	0	525	0	530	0	528	0	525	0	525	0	525	0	525	0	525	0	525	0	525	0	525	0	0	526.438	0.5625
15.6461	0	530	0	530	0	525	0	525	0	530	0	525	0	530	0	528	0	525	0	525	0	525	0	525	0	525	0	525	0	525	0	525	0	0	526.438	0.5625
15.6572	0	530	0	530	0	525	0	525	0	530	0	525	0	530	0	528	0	525	0	525	0	525	0	525	0	525	0	525	0	525	0	525	0	0	526.438	0.5625
15.6684	0	530	0	530	0	525	0	525	0	530	0	525	0	530	0	528	0	525	0	525	0	525	0	525	0	525	0	525	0	525	0	525	0	0	526.438	0.5625
15.6795	0	530	0	530	0	525	0	525	0	530	0	525	0	530	0	528	0	525	0	525	0	525	0	525	0	525	0	525	0	525	0	525	0	0	526.438	0.5625
15.6907	0	530	0	530	0	525	0	525	0	530	0	525	0	530	0	528	0	525	0	525	0	525	0	525	0	525	0	525	0	525	0	525	0	0	526.438	0.5625
15.7019	0	530	0	530	0	525	0	525	0	530	0	525	0	530	0	528	0	525	0	525	0	525	0	525	0	525	0	525	0	525	0	525	0	0	526.438	0.5625
15.713	0	530	0	530	0	525	0	525	0	530	0	525	0	530	0	528	0	525	0	525	0	525	0	525	0	525	0	525	0	525	0	525	0	0	526.438	0.5625
15.7242	0	530	0	530	0	525	0	525	0	530	0	525	0	530	0	528	0	525	0	525	0	525	0	525	0	525	0	525	0	525	0	525	0	0	526.438	0.5625
15.7353	0	530	0	530	0	525	0	525	0	530	0	525	0	530	0	528	0	525	0	525	0	525	0	525	0	525	0	525	0	525	0	525	0	0	526.438	0.5625
15.7465	0	530	0	530	0	525	0	525	0	530	0	525	0	530	0	528	0	525	0	525	0	525	0	525	0	525	0	525	0	525	0	525	0	0	526.438	0.5625
15.7577	0	530	0	530	0	525	0	525	0	530	0	525	0	530	0	528	0	525	0	525	0	525	0	525	0	525	0	525	0	525	0	525	0	0	526.438	0.5625
15.7688	0	530	0	530	0	525	0	525	0	530	0	525	0	530	0	528	0	525	0	525	0	525	0	525	0	525	0	525	0	525	0	525	0	0	526.438	0.5625
15.78	0	530	0	530	0	525	0	525	0	530	0	525	0	530	0	528	0	525	0	525	0	525	0	525	0	525	0	525	0	525	0	525	0	0	526.438	0.5625
15.7911	0	530	0	530	0	525	0	525	0	530	0	525	0	530	0	528	0	525	0	525	0	525	0	525	0	525	0	525	0	525	0	525	0	0	526.438	0.5625
15.8023	0	530	0	530	0	525	0	525	0	530	0	525	0	530	0	528	0	525	0	525	0	525	0	525	0	525	0	525	0	525	0	525	0	0	526.438	0.5625
15.8135	0	530	0	530	0	525	0	525	0	530	0	525	0	530	0	528	0	525	0	525	0	525	0	525	0	525	0	525	0	525	0	525	0	0	526.438	0.5625
15.8246	0	530	0	530	0	525	0	525	0	530	0	525	0	530	0	528	0	525	0	525	0	525	0	525	0	525	0	525	0	525	0	525	0	0	526.438	0.5625
15.8358	0	530	0	530	0	525	0	525	0	530	0	525	0	530	0	528	0	525	0	525	0	525	0	525	0	525	0	525	0	525	0	525	0	0	526.438	0.5625
15.8469	0	530	0	530	0	525	0	525	0	530	0	525	0	530	0	528	0	525	0	525	0	525	0	525	0	525	0	525	0	525	0	525	0	0	526.438	0.5625
15.8581	0	530	0	530	0	525	0	525	0	530	0	525	0	530	0	528	0	525	0	525	0	525	0	525	0	525	0	525	0	525	0	525	0	0	526.438	0.5625
15.8693	0	530	0	530	0	525	0	525	0	530	0	525	0	530	0	528	0	525	0	525	0	525	0	525	0	525	0	525	0	525	0	525	0	0	526.438	0.5625
15.8804	0	530	0	530	0	525	0	525	0	530	0	525	0	530	0	528	0	525	0	525	0	525	0	525	0	525	0	525	0	525	0	525	0	0	526.438	0.5625
15.8916	0	530	0	530	0	525	0	525	0	530	0	525	0	530	0	528	0	525	0	525	0	525	0	525	0	525	0	525	0	525	0	525	0	0	526.438	0.5625
15.9027	0	530	0	530	0	525	0	525	0	530	0	525	0	530	0	528	0	525	0	525	0	525	0	525	0	525	0	525	0	525	0	525	0	0	526.438	0.5625
15.9139	0	530	0	530	0	525	0	525	0	530	0	525	0	530	0	528	0	525	0	525	0	525	0	525	0	525	0	525	0	525	0	525	0	0	526.438	0.5625
15.9251	0	530	0	530	0	525	0	525	0	530	0	525	0	530	0	528	0	525	0	525	0	525	0	525	0	525	0	525	0	525	0	525	0	0	526.438	0.5625
15.9362	0	530	0	530	0	525	0	525	0	530	0	525	0	530	0	528	0	525	0	525	0	525	0	525	0	525	0	525	0	525	0	525	0	0	526.438	0.5625
15.9474	0	530	0	530	0	525	0	525	0	530	0	525	0	530	0	528	0	525	0	525	0	525	0	525	0	525	0	525	0	525	0	525	0	0	526.438	0.5625
15.9585	0	530	0	530	0	525	0	525	0	530	0	525	0	530	0	528	0	525	0	525	0	525	0	525	0	525	0	525	0	525	0	525	0	0	526.438	0.5625
15.9697	0	530	0	530	0	525	0	525	0	530	0	525	0	530	0	528	0	525	0	525	0	525	0	525	0	525	0	525	0	525	0	525	0	0	526.438	0.5625
15.9809	0	530	0	530	0	525	0	525	0	530	0	525	0	530	0	528	0	525	0	525	0	525	0	525	0	525	0	525	0	525	0	525	0	0	526.438	0.5625
15.992	0	530	0	530	0	525	0	525	0	530	0	525	0	530	0	528	0	525	0	525	0	525	0	525	0	525	0	525	0	525	0	525	0	0	526.438	0.5625
16.0032	0	530	0	530	0	525	0	525	0	530	0	525	0	530	0	528	0	525	0	525	0	525	0	525	0	525	0	525	0	525	0	525	0	0	526.438	0.5625
16.0143	0	530	0	530	0	525	0	525	0	530	0	525	0	530	0	528	0	525	0	525	0	525	0	525	0	525	0	525	0	525	0	525	0	0	526.438	0.5625
16.0255	0	530	0	530	0	525	0	525	0	530	0	525	0	530	0	528	0	525	0	525	0	525	0	525	0	525	0	525	0	525	0	525	0	0	526.438	0.5625
16.0367	0	530	0	530	0	525	0	525	0	530	0	525	0	530	0	528	0	525	0	525	0	525	0	525	0	525	0	525	0	525	0	525	0	0	526.438	0.5625
16.0478	0	530	0	530	0	525	0	525	0	530	0	525	0	530	0	528	0	525	0	525	0	525	0	525	0	525	0	525	0	525	0	525	0	0	526.438	0.5625
16.059	0	530	0	530	0	525	0	525	0	530	0	525	0	530	0	528	0	525	0	525	0	525	0	525	0	525	0	525	0	525	0	525	0	0	526.438	0.5625
16.0701	0	530	0	530	0	525	0	525	0	530	0	525	0	530	0	528	0	525	0	525	0	525	0	525	0	525	0	525	0	525	0	525	0	0	526.438	0.5625
16.0813	0	530	0	530	0	525	0	525	0	530	0	525	0	530	0	528	0	525	0	525	0	525	0	525	0	525	0	525	0	525	0	525	0	0	526.438	0.5625
16.0925	0	530	0	530	0	525	0	525	0	530	0	525	0	530	0	528	0	525	0	525	0	525	0	525	0	525	0	525	0	525	0	525	0	0	526.438	0.5625
16.1036	0	530	0	530	0	525	0	525	0	530	0	525	0	530	0	528	0	525	0	525	0	525	0	525	0	525	0	525	0	525	0	525	0	0	526.438	0.5625
16.1148	0	530	0	530	0	525	0	525	0	530	0	525	0	530	0	528	0	525	0	525	0	525	0	525	0	525	0	525	0	525	0	525	0	0	526.438	0.5625
16.1259	0	530	0	530	0	525	0	525	0	530	0	525	0	530	0	528	0	525	0	525	0	525	0	525	0	525	0	525	0	525	0	525	0	0	526.438	0.5625
16.1371	0	530	0	530	0	525	0	525	0	530	0	525	0	530	0	528	0	525	0	525	0	525	0	525	0	525	0	525	0	525	0	525	0	0	526.438	0.5625
16.1482	0	530	0	530	0	525	0	525	0	530	0	525	0	530	0	528	0	525	0	525	0	525	0	525	0	525	0	525	0	525	0	525	0	0	526.438	0.5625
16.1594	0	530	0	530	0	525	0	525	0	530	0	525	0	530	0	528	0	525	0	525	0	525	0	525	0	525	0	525	0	525	0	525	0	0	526.438	0.5625
16.1706	0	530	0	530	0	525	0	525	0	530	0	525	0	530	0	528	0	525	0	525	0	525	0	525	0	525	0	525	0	525	0	525	0	0	526.438	0.5625
16.1817	0	530	0	530	0	525	0	525	0	530	0	525	0	530	0	528	0	525	0	525	0	525	0	525	0	525	0	525	0	525	0	525	0	0	526.438	0.5625
16.1929	0	530	0	530	0	525	0	525	0	530	0	525	0	530	0	528	0	525	0	525	0	525	0	525	0	525	0	525	0	525	0	525	0	0	526.438	0.5625
16.204	0	530	0	530	0	525	0	525	0	530	0	525	0	530	0	528	0	525	0	525	0	525	0	525	0	525	0	525	0	525	0	525	0	0	526.438	0.5625
16.2152	0	530	0	530	0	525	0	525	0	530	0	525	0	530	0	528	0	525	0	525	0	525	0	525	0	525	0	525	0	525	0	525	0	0	526.438	0.5625
16.2264	0	530	0	530	0	525	0	525	0	530	0	525	0	530	0	528	0	525	0	525	0	525	0	525	0	525	0	525	0	525	0	525	0	0	526.438	0.5625
16.2375	0	530	0	530	0	525	0	525	0	530	0	525	0	530	0	528	0	525	0	525	0	525	0	525	0	525	0	525	0	525	0	525	0	0	526.438	0.5625
16.2487	0	530	0	530	0	525	0	525	0	530	0	525	0	530	0	528	0	525	0	525	0	525	0	525	0	525	0	525	0	525	0	525	0	0	526.438	0.5625
16.2598	0	530	0	530	0	525	0	525	0	530	0	525	0	530	0	528	0	525	0	525	0	525	0	525	0	525	0	525	0	525	0	525	0	0	526.438	0.5625
16.271	0	530	0	530	0	525	0	525	0	530	0	525	0	530	0	528	0	525	0	525	0	525	0	525	0	525	0	525	0	525	0	525	0	0	526.438	0.5625
16.2822	0	530	0	530	0	525	0	525	0	530	0	525	0	530	0	528	0	525	0	525	0	525	0	525	0	525	0	525	0	525	0	525	0	0	526.438	0.5625
16.2933	0	530	0	530	0	525	0	525	0	530	0	525	0	530	0	528	0	525	0	525	0	525	0	525	0	525	0	525	0	525	0	525	0	0	526.438	0.5625
16.3045	0	530	0	530	0	525	0	525	0	530	0	525	0	530	0	528	0	525	0	525	0	525	0	525	0	525	0	525	0	525	0	525	0	0	526.438	0.5625
16.3156	0	530	0	530	0	525	0	525	0	530	0	525	0	530	0	528	0	525	0	525	0	525	0	525	0	525	0	525	0	525	0	525	0	0	526.438	0.5625
16.3268	0	530	0	530	0	525	0	525	0	530	0	525	0	530	0	528	0	525	0	525	0	525	0	525	0	525	0	525	0	525	0	525	0	0	526.438	0.5625
16.338	0	530	0	530	0	525	0	525	0	530	0	525	0	530	0	528	0	525	0	525	0	525	0	525	0	525	0	525	0	525	0	525	0	0	526.438	0.5625
16.3491	0	530	0	530	0	525	0	525	0	530	0	525	0	530	0	528	0	525	0	525	0	525	0	525	0	525	0	525	0	525	0	525	0	0	526.438	0.5625
16.3603	0	530	0	530	0	525	0	525	0	530	0	525	0	530	0	528	0	525	0	525	0	525	0	525	0	525	0	525	0	525	0	525	0	0	526.438	0.5625
16.3714	0	530	0	530	0	525	0	525	0	530	0	525	0	530	0	528	0	525	0	525	0	525	0	525	0	525	0	525	0	525	0	525	0	0	526.438	0.5625
16.3826	0	530	0	530	0	525	0	525	0	530	0	525	0	530	0	528	0	525	0	525	0	525	0	525	0	525	0	525	0	525	0	525	0	0	526.438	0.5625
16.3938	0	530	0	530	0	525	0	525	0	530	0	525	0	530	0	528	0	525	0	525	0	525	0	525	0	525	0	525	0	525	0	525	0	0	526.438	0.5625
16.4049	0	530	0	530	0	525	0	525	0	530	0	525	0	530	0	528	0	525	0	525	0	525	0	525	0	525	0	525	0	525	0	525	0	0	526.438	0.5625
16.4161	0	530	0	530	0	525	0	525	0	530	0	525	0	530	0	528	0	525	0	525	0	525	0	525	0	525	0	525	0	525	0	525	0	0	526.438	0.5625
16.4272	0	530	0	530	0	525	0	525	0	530	0	525	0	530	0	528	0	525	0	525	0	525	0	525	0	525	0	525	0	525	0	525	0	0	526.438	0.5625
16.4384	0	530	0	530	0	525	0	525	0	530	0	525	0	530	0	528	0	525	0	525	0	525	0	525	0	525	0	525	0	525	0	525	0	0	526.438	0.5625
16.4496	0	530	0	530	0	525	0	525	0	530	0	525	0	530	0	528	0	525	0	525	0	525	0	525	0	525	0	525	0	525	0	525	0	0	526.438	0.5625
16.4607	0	530	0	530	0	525	0	525	0	530	0	525	0	530	0	528	0	525	0	525	0	525	0	525	0	525	0	525	0	525	0	525	0	0	526.438	0.5625
16.4719	0	530	0	530	0	525	0	525	0	530	0	525	0	530	0	528	0	525	0	525	0	525	0	525	0	525	0	525	0	525	0	525	0	0	526.438	0.5625
16.483	0	530	0	530	0	525	0	525	0	530	0	525	0	530	0	528	0	525	0	525	0	525	0	525	0	525	0	525	0	525	0	525	0	0	526.438	0.5625
16.4942	0	530	0	530	0	525	0	525	0	530	0	525	0	530	0	528	0	525	0	525	0	525	0	525	0	525	0	525	0	525	0	525	0	0	526.438	0.5625
16.5054	0	530	0	530	0	525	0	525	0	530	0	525	0	530	0	528	0	525	0	525	0	525	0	525	0	525	0	525	0	525	0	525	0	0	526.438	0.5625
16.5165	0	530	0	530	0	525	0	525	0	530	0	525	0	530	0	528	0	525	0	525	0	525	0	525	0	525	0	525	0	525	0	525	0	0	526.438	0.5625
16.5277	0	530	0	530	0	525	0	525	0	530	0	525	0	530	0	528	0	525	0	525	0	525	0	525	0	525	0	525	0	525	0	525	0	0	526.438	0.5625
16.5388	0	530	0	530	0	525	0	525	0	530	0	525	0	530	0	528	0	525	0	525	0	525	0	525	0	525	0	525	0	525	0	525	0	0	526.438	0.5625
16.55	0	530	0	530	0	525	0	525	0	530	0	525	0	530	0	528	0	525	0	525	0	525	0	525	0	525	0	525	0	525	0	525	0	0	526.438	0.5625
16.5612	0	530	0	530	0	525	0	525	0	530	0	525	0	530	0	528	0	525	0	525	0	525	0	525	0	525	0	525	0	525	0	525	0	0	526.438	0.5625
16.5723	0	530	0	530	0	525	0	525	0	530	0	525	0	530	0	528	0	525	0	525	0	525	0	525	0	525	0	525	0	525	0	525	0	0	526.438	0.5625
16.5835	0	530	0	530	0	525	0	525	0	530	0	525	0	530	0	528	0	525	0	525	0	525	0	525	0	525	0	525	0	525	0	525	0	0	526.438	0.5625
16.5946	0	530	0	530	0	525	0	525	0	530	0	525	0	530	0	528	0	525	0	525	0	525	0	525	0	525	0	525	0	525	0	525	0	0	526.438	0.5625
16.6058	0	530	0	530	0	525	0	525	0	530	0	525	0	530	0	528	0	525	0	525	0	525	0	525	0	525	0	525	0	525	0	525	0	0	526.438	0.5625
16.617	0	530	0	530	0	525	0	525	0	530	0	525	0	530	0	528	0	525	0	525	0	525	0	525	0	525	0	525	0	525	0	525	0	0	526.438	0.5625
16.6281	0	530	0	530	0	525	0	525	0	530	0	525	0	530	0	528	0	525	0	525	0	525	0	525	0	525	0	525	0	525	0	525	0	0	526.438	0.5625
16.6393	0	530	0	530	0	525	0	525	0	530	0	525	0	530	0	528	0	525	0	525	0	525	0	525	0	525	0	525	0	525	0	525	0	0	526.438	0.5625
16.6504	0	530	0	530	0	525	0	525	0	530	0	525	0	530	0	528	0	525	0	525	0	525	0	525	0	525	0	525	0	525	0	525	0	0	526.438	0.5625
16.6616	0	530	0	530	0	525	0	525	0	530	0	525	0	530	0	528	0	525	0	525	0	525	0	525	0	525	0	525	0	525	0	525	0	0	526.438	0.5625
16.6728	0	530	0	530	0	525	0	525	0	530	0	525	0	530	0	528	0	525	0	525	0	525	0	525	0	525	0	525	0	525	0	525	0	0	526.438	0.5625
16.6839	0	530	0	530	0	525	0	525	0	530	0	525	0	530	0	528	0	525	0	525	0	525	0	525	0	525	0	525	0	525	0	525	0	0	526.438	0.5625
16.6951	0	530	0	530	0	525	0	525	0	530	0	525	0	530	0	528	0	525	0	525	0	525	0	525	0	525	0	525	0	525	0	525	0	0	526.438	0.5625
16.7062	0	530	0	530	0	525	0	525	0	530	0	525	0	530	0	528	0	525	0	525	0	525	0	525	0	525	0	525	0	525	0	525	0	0	526.438	0.5625
16.7174	0	530	0	530	0	525	0	525	0	530	0	525	0	530	0	528	0	525	0	525	0	525	0	525	0	525	0	525	0	525	0	525	0	0	526.438	0.5625
16.7286	0	530	0	530	0	525	0	525	0	530	0	525	0	530	0	528	0	525	0	525	0	525	0	525	0	525	0	525	0	525	0	525	0	0	526.438	0.5625
16.7397	0	530	0	530	0	525	0	525	0	530	0	525	0	530	0	528	0	525	0	525	0	525	0	525	0	525	0	525	0	525	0	525	0	0	526.438	0.5625
16.7509	0	530	0	530	0	525	0	525	0	530	0	525	0	530	0	528	0	525	0	525	0	525	0	525	0	525	0	525	0	525	0	525	0	0	526.438	0.5625
16.762	0	530	0	530	0	525	0	525	0	530	0	525	0	530	0	528	0	525	0	525	0	525	0	525	0	525	0	525	0	525	0	525	0	0	526.438	0.5625
16.7732	0	530	0	530	0	525	0	525	0	530	0	525	0	530	0	528	0	525	0	525	0	525	0	525	0	525	0	525	0	525	0	525	0	0	526.438	0.5625
16.7844	0	530	0	530	0	525	0	525	0	530	0	525	0	530	0	528	0	525	0	525	0	525	0	525	0	525	0	525	0	525	0	525	0	0	526.438	0.5625
16.7955	0	530	0	530	0	525	0	525	0	530	0	525	0	530	0	528	0	525	0	525	0	525	0	525	0	525	0	525	0	525	0	525	0	0	526.438	0.5625
16.8067	0	530	0	530	0	525	0	525	0	530	0	525	0	530	0	528	0	525	0	525	0	525	0	525	0	525	0	525	0	525	0	525	0	0	526.438	0.5625
16.8178	0	530	0	530	0	525	0	525	0	530	0	525	0	530	0	528	0	525	0	525	0	525	0	525	0	525	0	525	0	525	0	525	0	0	526.438	0.5625
16.829	0	530	0	530	0	525	0	525	0	530	0	525	0	530	0	528	0	525	0	525	0	525	0	525	0	525	0	525	0	525	0	525	0	0	526.438	0.5625
16.8402	0	530	0	530	0	525	0	525	0	530	0	525	0	530	0	528	0	525	0	525	0	525	0	525	0	525	0	525	0	525	0	525	0	0	526.438	0.5625
16.8513	0	530	0	530	0	525	0	525	0	530	0	525	0	530	0	528	0	525	0	525	0	525	0	525	0	525	0	525	0	525	0	525	0	0	526.438	0.5625
16.8625	0	530	0	530	0	525	0	525	0	530	0	525	0	530	0	528	0	525	0	525	0	525	0	525	0	525	0	525	0	525	0	525	0	0	526.438	0.5625
16.8736	0	530	0	530	0	525	0	525	0	530	0	525	0	530	0	528	0	525	0	525	0	525	0	525	0	525	0	525	0	525	0	525	0	0	526.438	0.5625
16.8848	0	530	0	530	0	525	0	525	0	530	0	525	0	530	0	528	0	525	0	525	0	525	0	525	0	525	0	525	0	525	0	525	0	0	526.438	0.5625
16.896	0	530	0	530	0	525	0	525	0	530	0	525	0	530	0	528	0	525	0	525	0	525	0	525	0	525	0	525	0	525	0	525	0	0	526.438	0.5625
16.9071	0	530	0	530	0	525	0	525	0	530	0	525	0	530	0	528	0	525	0	525	0	525	0	525	0	525	0	525	0	525	0	525	0	0	526.438	0.5625
16.9183	0	530	0	530	0	525	0	525	0	530	0	525	0	530	0	528	0	525	0	525	0	525	0	525	0	525	0	525	0	525	0	525	0	0	526.438	0.5625
16.9294	0	530	0	530	0	525	0	525	0	530	0	525	0	530	0	528	0	525	0	525	0	525	0	525	0	525	0	525	0	525	0	525	0	0	526.438	0.5625
16.9406	0	530	0	530	0	525	0	525	0	530	0	525	0	530	0	528	0	525	0	525	0	525	0	525	0	525	0	525	0	525	0	525	0	0	526.438	0.5625
16.9518	0	530	0	530	0	525	0	525	0	530	0	525	0	530	0	528	0	525	0	525	0	525	0	525	0	525	0	525	0	525	0	525	0	0	526.438	0.5625
16.9629	0	530	0	530	0	525	0	525	0	530	0	525	0	530	0	528	0	525	0	525	0	525	0	525	0	525	0	525	0	525	0	525	0	0	526.438	0.5625
16.9741	0	530	0	530	0	525	0	525	0	530	0	525	0	530	0	528	0	525	0	525	0	525	0	525	0	525	0	525	0	525	0	525	0	0	526.438	0.5625
16.9852	0	530	0	530	0	525	0	525	0	530	0	525	0	530	0	528	0	525	0	525	0	525	0	525	0	525	0	525	0	525	0	525	0	0	526.438	0.5625
16.9964	0	530	0	530	0	525	0	525	0	530	0	525	0	530	0	528	0	525	0	525	0	525	0	525	0	525	0	525	0	525	0	525	0	0	526.438	0.5625
17.0076	0	530	0	530	0	525	0	525	0	530	0	525	0	530	0	528	0	525	0	525	0	525	0	525	0	525	0	525	0	525	0	525	0	0	526.438	0.5625
17.0187	0	530	0	530	0	525	0	525	0	530	0	525	0	530	0	528	0	525	0	525	0	525	0	525	0	525	0	525	0	525	0	525	0	0	526.438	0.5625
17.0299	0	530	0	530	0	525	0	525	0	530	0	525	0	530	0	528	0	525	0	525	0	525	0	525	0	525	0	525	0	525	0	525	0	0	526.438	0.5625
17.041	0	530	0	530	0	525	0	525	0	530	0	525	0	530	0	528	0	525	0	525	0	525	0	525	0	525	0	525	0	525	0	525	0	0	526.438	0.5625
17.0522	0	530	0	530	0	525	0	525	0	530	0	525	0	530	0	528	0	525	0	525	0	525	0	525	0	525	0	525	0	525	0	525	0	0	526.438	0.5625
17.0634	0	530	0	530	0	525	0	525	0	530	0	525	0	530	0	528	0	525	0	525	0	525	0	525	0	525	0	525	0	525	0	525	0	0	526.438	0.5625
17.0745	0	530	0	530	0	525	0	525	0	530	0	525	0	530	0	528	0	525	0	525	0	525	0	525	0	525	0	525	0	525	0	525	0	0	526.438	0.5625
17.0857	0	530	0	530	0	525	0	525	0	530	0	525	0	530	0	528	0	525	0	525	0	525	0	525	0	525	0	525	0	525	0	525	0	0	526.438	0.5625
17.0968	0	530	0	530	0	525	0	525	0	530	0	525	0	530	0	528	0	525	0	525	0	525	0	525	0	525	0	525	0	525	0	525	0	0	526.438	0.5625
17.108	0	530	0	530	0	525	0	525	0	530	0	525	0	530	0	528	0	525	0	525	0	525	0	525	0	525	0	525	0	525	0	525	0	0	526.438	0.5625
17.1192	0	530	0	530	0	525	0	525	0	530	0	525	0	530	0	528	0	525	0	525	0	525	0	525	0	525	0	525	0	525	0	525	0	0	526.438	0.5625
17.1303	0	530	0	530	0	525	0	525	0	530	0	525	0	530	0	528	0	525	0	525	0	525	0	525	0	525	0	525	0	525	0	525	0	0	526.438	0.5625
17.1415	0	530	0	530	0	525	0	525	0	530	0	525	0	530	0	528	0	525	0	525	0	525	0	525	0	525	0	525	0	525	0	525	0	0	526.438	0.5625
17.1526	0	530	0	530	0	525	0	525	0	530	0	525	0	530	0	528	0	525	0	525	0	525	0	525	0	525	0	525	0	525	0	525	0	0	526.438	0.5625
17.1638	0	530	0	530	0	525	0	525	0	530	0	525	0	530	0	528	0	525	0	525	0	525	0	525	0	525	0	525	0	525	0	525	0	0	526.438	0.5625
17.175	0	530	0	530	0	525	0	525	0	530	0	525	0	530	0	528	0	525	0	525	0	525	0	525	0	525	0	525	0	525	0	525	0	0	526.438	0.5625
17.1861	0	530	0	530	0	525	0	525	0	530	0	525	0	530	0	528	0	525	0	525	0	525	0	525	0	525	0	525	0	525	0	525	0	0	526.438	0.5625
17.1973	0	530	0	530	0	525	0	525	0	530	0	525	0	530	0	528	0	525	0	525	0	525	0	525	0	525	0	525	0	525	0	525	0	0	526.438	0.5625
17.2084	0	530	0	530	0	525	0	525	0	530	0	525	0	530	0	528	0	525	0	525	0	525	0	525	0	525	0	525	0	525	0	525	0	0	526.438	0.5625
17.2196	0	530	0	530	0	525	0	525	0	530	0	525	0	530	0	528	0	525	0	525	0	525	0	525	0	525	0	525	0	525	0	525	0	0	526.438	0.5625
17.2308	0	530	0	530	0	525	0	525	0	530	0	525	0	530	0	528	0	525	0	525	0	525	0	525	0	525	0	525	0	525	0	525	0	0	526.438	0.5625
17.2419	0	530	0	530	0	525	0	525	0	530	0	525	0	530	0	528	0	525	0	525	0	525	0	525	0	525	0	525	0	525	0	525	0	0	526.438	0.5625
17.2531	0	530	0	530	0	525	0	525	0	530	0	525	0	530	0	528	0	525	0	525	0	525	0	525	0	525	0	525	0	525	0	525	0	0	526.438	0.5625
17.2642	0	530	0	530	0	525	0	525	0	530	0	525	0	530	0	528	0	525	0	525	0	525	0	525	0	525	0	525	0	525	0	525	0	0	526.438	0.5625
17.2754	0	530	0	530	0	525	0	525	0	530	0	525	0	530	0	528	0	525	0	525	0	525	0	525	0	525	0	525	0	525	0	525	0	0	526.438	0.5625
17.2866	0	530	0	530	0	525	0	525	0	530	0	525	0	530	0	528	0	525	0	525	0	525	0	525	0	525	0	525	0	525	0	525	0	0	526.438	0.5625
17.2977	0	530	0	530	0	525	0	525	0	530	0	525	0	530	0	528	0	525	0	525	0	525	0	525	0	525	0	525	0	525	0	525	0	0	526.438	0.5625
17.3089	0	530	0	530	0	525	0	525	0	530	0	525	0	530	0	528	0	525	0	525	0	525	0	525	0	525	0	525	0	525	0	525	0	0	526.438	0.5625
17.32	0	530	0	530	0	525	0	525	0	530	0	525	0	530	0	528	0	525	0	525	0	525	0	525	0	525	0	525	0	525	0	525	0	0	526.438	0.5625
17.3312	0	530	0	530	0	525	0	525	0	530	0	525	0	530	0	528	0	525	0	525	0	525	0	525	0	525	0	525	0	525	0	525	0	0	526.438	0.5625
17.3423	0	530	0	530	0	525	0	525	0	530	0	525	0	530	0	528	0	525	0	525	0	525	0	525	0	525	0	525	0	525	0	525	0	0	526.438	0.5625
17.3535	0	530	0	530	0	525	0	525	0	530	0	525	0	530	0	528	0	525	0	525	0	525	0	525	0	525	0	525	0	525	0	525	0	0	526.438	0.5625
17.3647	0	530	0	530	0	525	0	525	0	530	0	525	0	530	0	528	0	525	0	525	0	525	0	525	0	525	0	525	0	525	0	525	0	0	526.438	0.5625
17.3758	0	530	0	530	0	525	0	525	0	530	0	525	0	530	0	528	0	525	0	525	0	525	0	525	0	525	0	525	0	525	0	525	0	0	526.438	0.5625
17.387	0	530	0	530	0	525	0	525	0	530	0	525	0	530	0	528	0	525	0	525	0	525	0	525	0	525	0	525	0	525	0	525	0	0	526.438	0.5625
17.3981	0	530	0	530	0	525	0	525	0	530	0	525	0	530	0	528	0	525	0	525	0	525	0	525	0	525	0	525	0	525	0	525	0	0	526.438	0.5625
17.4093	0	530	0	530	0	525	0	525	0	530	0	525	0	530	0	528	0	525	0	525	0	525	0	525	0	525	0	525	0	525	0	525	0	0	526.438	0.5625
17.4205	0	530	0	530	0	525	0	525	0	530	0	525	0	530	0	528	0	525	0	525	0	525	0	525	0	525	0	525	0	525	0	525	0	0	526.438	0.5625
17.4316	0	530	0	530	0	525	0	525	0	530	0	525	0	530	0	528	0	525	0	525	0	525	0	525	0	525	0	525	0	525	0	525	0	0	526.438	0.5625
17.4428	0	530	0	530	0	525	0	525	0	530	0	525	0	530	0	528	0	525	0	525	0	525	0	525	0	525	0	525	0	525	0	525	0	0	526.438	0.5625
17.4539	0	530	0	530	0	525	0	525	0	530	0	525	0	530	0	528	0	525	0	525	0	525	0	525	0	525	0	525	0	525	0	525	0	0	526.438	0.5625
17.4651	0	530	0	530	0	525	0	525	0	530	0	525	0	530	0	528	0	525	0	525	0	525	0	525	0	525	0	525	0	525	0	525	0	0	526.438	0.5625
17.4763	0	530	0	530	0	525	0	525	0	530	0	525	0	530	0	528	0	525	0	525	0	525	0	525	0	525	0	525	0	525	0	525	0	0	526.438	0.5625
17.4874	0	530	0	530	0	525	0	525	0	530	0	525	0	530	0	528	0	525	0	525	0	525	0	525	0	525	0	525	0	525	0	525	0	0	526.438	0.5625
17.4986	0	530	0	530	0	525	0	525	0	530	0	525	0	530	0	528	0	525	0	525	0	525	0	525	0	525	0	525	0	525	0	525	0	0	526.438	0.5625
17.5097	0	530	0	530	0	525	0	525	0	530	0	525	0	530	0	528	0	525	0	525	0	525	0	525	0	525	0	525	0	525	0	525	0	0	526.438	0.5625
17.5209	0	530	0	530	0	525	0	525	0	530	0	525	0	530	0	528	0	525	0	525	0	525	0	525	0	525	0	525	0	525	0	525	0	0	526.438	0.5625
17.5321	0	530	0	530	0	525	0	525	0	530	0	525	0	530	0	528	0	525	0	525	0	525	0	525	0	525	0	525	0	525	0	525	0	0	526.438	0.5625
17.5432	0	530	0	530	0	525	0	525	0	530	0	525	0	530	0	528	0	525	0	525	0	525	0	525	0	525	0	525	0	525	0	525	0	0	526.438	0.5625
17.5544	0	530	0	530	0	525	0	525	0	530	0	525	0	530	0	528	0	525	0	525	0	525	0	525	0	525	0	525	0	525	0	525	0	0	526.438	0.5625
17.5655	0	530	0	530	0	525	0	525	0	530	0	525	0	530	0	528	0	525	0	525	0	525	0	525	0	525	0	525	0	525	0	525	0	0	526.438	0.5625
17.5767	0	530	0	530	0	525	0	525	0	530	0	525	0	530	0	528	0	525	0	525	0	525	0	525	0	525	0	525	0	525	0	525	0	0	526.438	0.5625
17.5879	0	530	0	530	0	525	0	525	0	530	0	525	0	530	0	528	0	525	0	525	0	525	0	525	0	525	0	525	0	525	0	525	0	0	526.438	0.5625
17.599	0	530	0	530	0	525	0	525	0	530	0	525	0	530	0	528	0	525	0	525	0	525	0	525	0	525	0	525	0	525	0	525	0	0	526.438	0.5625
17.6102	0	530	0	530	0	525	0	525	0	530	0	525	0	530	0	528	0	525	0	525	0	525	0	525	0	525	0	525	0	525	0	525	0	0	526.438	0.5625
17.6213	0	530	0	530	0	525	0	525	0	530	0	525	0	530	0	528	0	525	0	525	0	525	0	525	0	525	0	525	0	525	0	525	0	0	526.438	0.5625
17.6325	0	530	0	530	0	525	0	525	0	530	0	525	0	530	0	528	0	525	0	525	0	525	0	525	0	525	0	525	0	525	0	525	0	0	526.438	0.5625
17.6437	0	530	0	530	0	525	0	525	0	530	0	525	0	530	0	528	0	525	0	525	0	525	0	525	0	525	0	525	0	525	0	525	0	0	526.438	0.5625
17.6548	0	530	0	530	0	525	0	525	0	530	0	525	0	530	0	528	0	525	0	525	0	525	0	525	0	525	0	525	0	525	0	525	0	0	526.438	0.5625
17.666	0	530	0	530	0	525	0	525	0	530	0	525	0	530	0	528	0	525	0	525	0	525	0	525	0	525	0	525	0	525	0	525	0	0	526.438	0.5625
17.6771	0	530	0	530	0	525	0	525	0	530	0	525	0	530	0	528	0	525	0	525	0	525	0	525	0	525	0	525	0	525	0	525	0	0	526.438	0.5625
17.6883	0	530	0	530	0	525	0	525	0	530	0	525	0	530	0	528	0	525	0	525	0	525	0	525	0	525	0	525	0	525	0	525	0	0	526.438	0.5625
17.6995	0	530	0	530	0	525	0	525	0	530	0	525	0	530	0	528	0	525	0	525	0	525	0	525	0	525	0	525	0	525	0	525	0	0	526.438	0.5625
17.7106	0	530	0	530	0	525	0	525	0	530	0	525	0	530	0	528	0	525	0	525	0	525	0	525	0	525	0	525	0	525	0	525	0	0	526.438	0.5625
17.7218	0	530	0	530	0	525	0	525	0	530	0	525	0	530	0	528	0	525	0	525	0	525	0	525	0	525	0	525	0	525	0	525	0	0	526.438	0.5625
17.7329	0	530	0	530	0	525	0	525	0	530	0	525	0	530	0	528	0	525	0	525	0	525	0	525	0	525	0	525	0	525	0	525	0	0	526.438	0.5625
17.7441	0	530	0	530	0	525	0	525	0	530	0	525	0	530	0	528	0	525	0	525	0	525	0	525	0	525	0	525	0	525	0	525	0	0	526.438	0.5625
17.7553	0	530	0	530	0	525	0	525	0	530	0	525	0	530	0	528	0	525	0	525	0	525	0	525	0	525	0	525	0	525	0	525	0	0	526.438	0.5625
17.7664	0	530	0	530	0	525	0	525	0	530	0	525	0	530	0	528	0	525	0	525	0	525	0	525	0	525	0	525	0	525	0	525	0	0	526.438	0.5625
17.7776	0	530	0	530	0	525	0	525	0	530	0	525	0	530	0	528	0	525	0	525	0	525	0	525	0	525	0	525	0	525	0	525	0	0	526.438	0.5625
17.7887	0	530	0	530	0	525	0	525	0	530	0	525	0	530	0	528	0	525	0	525	0	525	0	525	0	525	0	525	0	525	0	525	0	0	526.438	0.5625
17.7999	0	530	0	530	0	525	0	525	0	530	0	525	0	530	0	528	0	525	0	525	0	525	0	525	0	525	0	525	0	525	0	525	0	0	526.438	0.5625
17.8111	0	530	0	530	0	525	0	525	0	530	0	525	0	530	0	528	0	525	0	525	0	525	0	525	0	525	0	525	0	525	0	525	0	0	526.438	0.5625
17.8222	0	530	0	530	0	525	0	525	0	530	0	525	0	530	0	528	0	525	0	525	0	525	0	525	0	525	0	525	0	525	0	525	0	0	526.438	0.5625
17.8334	0	530	0	530	0	525	0	525	0	530	0	525	0	530	0	528	0	525	0	525	0	525	0	525	0	525	0	525	0	525	0	525	0	0	526.438	0.5625
17.8445	0	530	0	530	0	525	0	525	0	530	0	525	0	530	0	528	0	525	0	525	0	525	0	525	0	525	0	525	0	525	0	525	0	0	526.438	0.5625
17.8557	0	530	0	530	0	525	0	525	0	530	0	525	0	530	0	528	0	525	0	525	0	525	0	525	0	525	0	525	0	525	0	525	0	0	526.438	0.5625
17.8669	0	530	0	530	0	525	0	525	0	530	0	525	0	530	0	528	0	525	0	525	0	525	0	525	0	525	0	525	0	525	0	525	0	0	526.438	0.5625
17.878	0	530	0	530	0	525	0	525	0	530	0	525	0	530	0	528	0	525	0	525	0	525	0	525	0	525	0	525	0	525	0	525	0	0	526.438	0.5625
17.8892	0	530	0	530	0	525	0	525	0	530	0	525	0	530	0	528	0	525	0	525	0	525	0	525	0	525	0	525	0	525	0	525	0	0	526.438	0.5625
17.9003	0	530	0	530	0	525	0	525	0	530	0	525	0	530	0	528	0	525	0	525	0	525	0	525	0	525	0	525	0	525	0	525	0	0	526.438	0.5625
17.9115	0	530	0	530	0	525	0	525	0	530	0	525	0	530	0	528	0	525	0	525	0	525	0	525	0	525	0	525	0	525	0	525	0	0	526.438	0.5625
17.9227	0	530	0	530	0	525	0	525	0	530	0	525	0	530	0	528	0	525	0	525	0	525	0	525	0	525	0	525	0	525	0	525	0	0	526.438	0.5625
17.9338	0	530	0	530	0	525	0	525	0	530	0	525	0	530	0	528	0	525	0	525	0	525	0	525	0	525	0	525	0	525	0	525	0	0	526.438	0.5625
17.945	0	530	0	530	0	525	0	525	0	530	0	525	0	530	0	528	0	525	0	525	0	525	0	525	0	525	0	525	0	525	0	525	0	0	526.438	0.5625
17.9561	0	530	0	530	0	525	0	525	0	530	0	525	0	530	0	528	0	525	0	525	0	525	0	525	0	525	0	525	0	525	0	525	0	0	526.438	0.5625
17.9673	0	530	0	530	0	525	0	525	0	530	0	525	0	530	0	528	0	525	0	525	0	525	0	525	0	525	0	525	0	525	0	525	0	0	526.438	0.5625
17.9785	0	530	0	530	0	525	0	525	0	530	0	525	0	530	0	528	0	525	0	525	0	525	0	525	0	525	0	525	0	525	0	525	0	0	526.438	0.5625
17.9896	0	530	0	530	0	525	0	525	0	530	0	525	0	530	0	528	0	525	0	525	0	525	0	525	0	525	0	525	0	525	0	525	0	0	526.438	0.5625
18.0008	0	530	0	530	0	525	0	525	0	530	0	525	0	530	0	528	0	525	0	525	0	525	0	525	0	525	0	525	0	525	0	525	0	0	526.438	0.5625
18.0119	0	530	0	530	0	525	0	525	0	530	0	525	0	530	0	528	0	525	0	525	0	525	0	525	0	525	0	525	0	525	0	525	0	0	526.438	0.5625
18.0231	0	530	0	530	0	525	0	525	0	530	0	525	0	530	0	528	0	525	0	525	0	525	0	525	0	525	0	525	0	525	0	525	0	0	526.438	0.5625
18.0343	0	530	0	530	0	525	0	525	0	530	0	525	0	530	0	528	0	525	0	525	0	525	0	525	0	525	0	525	0	525	0	525	0	0	526.438	0.5625
18.0454	0	530	0	530	0	525	0	525	0	530	0	525	0	530	0	528	0	525	0	525	0	525	0	525	0	525	0	525	0	525	0	525	0	0	526.438	0.5625
18.0566	0	530	0	530	0	525	0	525	0	530	0	525	0	530	0	528	0	525	0	525	0	525	0	525	0	525	0	525	0	525	0	525	0	0	526.438	0.5625
18.0677	0	530	0	530	0	525	0	525	0	530	0	525	0	530	0	528	0	525	0	525	0	525	0	525	0	525	0	525	0	525	0	525	0	0	526.438	0.5625
18.0789	0	530	0	530	0	525	0	525	0	530	0	525	0	530	0	528	0	525	0	525	0	525	0	525	0	525	0	525	0	525	0	525	0	0	526.438	0.5625
18.0901	0	530	0	530	0	525	0	525	0	530	0	525	0	530	0	528	0	525	0	525	0	525	0	525	0	525	0	525	0	525	0	525	0	0	526.438	0.5625
18.1012	0	530	0	530	0	525	0	525	0	530	0	525	0	530	0	528	0	525	0	525	0	525	0	525	0	525	0	525	0	525	0	525	0	0	526.438	0.5625
18.1124	0	530	0	530	0	525	0	525	0	530	0	525	0	530	0	528	0	525	0	525	0	525	0	525	0	525	0	525	0	525	0	525	0	0	526.438	0.5625
18.1235	0	530	0	530	0	525	0	525	0	530	0	525	0	530	0	528	0	525	0	525	0	525	0	525	0	525	0	525	0	525	0	525	0	0	526.438	0.5625
18.1347	0	530	0	530	0	525	0	525	0	530	0	525	0	530	0	528	0	525	0	525	0	525	0	525	0	525	0	525	0	525	0	525	0	0	526.438	0.5625
18.1459	0	530	0	530	0	525	0	525	0	530	0	525	0	530	0	528	0	525	0	525	0	525	0	525	0	525	0	525	0	525	0	525	0	0	526.438	0.5625
18.157	0	530	0	530	0	525	0	525	0	530	0	525	0	530	0	528	0	525	0	525	0	525	0	525	0	525	0	525	0	525	0	525	0	0	526.438	0.5625
18.1682	0	530	0	530	0	525	0	525	0	530	0	525	0	530	0	528	0	525	0	525	0	525	0	525	0	525	0	525	0	525	0	525	0	0	526.438	0.5625
18.1793	0	530	0	530	0	525	0	525	0	530	0	525	0	530	0	528	0	525	0	525	0	525	0	525	0	525	0	525	0	525	0	525	0	0	526.438	0.5625
18.1905	0	530	0	530	0	525	0	525	0	530	0	525	0	530	0	528	0	525	0	525	0	525	0	525	0	525	0	525	0	525	0	525	0	0	526.438	0.5625
18.2017	0	530	0	530	0	525	0	525	0	530	0	525	0	530	0	528	0	525	0	525	0	525	0	525	0	525	0	525	0	525	0	525	0	0	526.438	0.5625
18.2128	0	530	0	530	0	525	0	525	0	530	0	525	0	530	0	528	0	525	0	525	0	525	0	525	0	525	0	525	0	525	0	525	0	0	526.438	0.5625
18.224	0	530	0	530	0	525	0	525	0	530	0	525	0	530	0	528	0	525	0	525	0	525	0	525	0	525	0	525	0	525	0	525	0	0	526.438	0.5625
18.2351	0	530	0	530	0	525	0	525	0	530	0	525	0	530	0	528	0	525	0	525	0	525	0	525	0	525	0	525	0	525	0	525	0	0	526.438	0.5625
18.2463	0	530	0	530	0	525	0	525	0	530	0	525	0	530	0	528	0	525	0	525	0	525	0	525	0	525	0	525	0	525	0	525	0	0	526.438	0.5625
18.2575	0	530	0	530	0	525	0	525	0	530	0	525	0	530	0	528	0	525	0	525	0	525	0	525	0	525	0	525	0	525	0	525	0	0	526.438	0.5625
18.2686	0	530	0	530	0	525	0	525	0	530	0	525	0	530	0	528	0	525	0	525	0	525	0	525	0	525	0	525	0	525	0	525	0	0	526.438	0.5625
18.2798	0	530	0	530	0	525	0	525	0	530	0	525	0	530	0	528	0	525	0	525	0	525	0	525	0	525	0	525	0	525	0	525	0	0	526.438	0.5625
18.2909	0	530	0	530	0	525	0	525	0	530	0	525	0	530	0	528	0	525	0	525	0	525	0	525	0	525	0	525	0	525	0	525	0	0	526.438	0.5625
18.3021	0	530	0	530	0	525	0	525	0	530	0	525	0	530	0	528	0	525	0	525	0	525	0	525	0	525	0	525	0	525	0	525	0	0	526.438	0.5625
18.3133	0	530	0	530	0	525	0	525	0	530	0	525	0	530	0	528	0	525	0	525	0	525	0	525	0	525	0	525	0	525	0	525	0	0	526.438	0.5625
18.3244	0	530	0	530	0	525	0	525	0	530	0	525	0	530	0	528	0	525	0	525	0	525	0	525	0	525	0	525	0	525	0	525	0	0	526.438	0.5625
18.3356	0	530	0	530	0	525	0	525	0	530	0	525	0	530	0	528	0	525	0	525	0	525	0	525	0	525	0	525	0	525	0	525	0	0	526.438	0.5625
18.3467	0	530	0	530	0	525	0	525	0	530	0	525	0	530	0	528	0	525	0	525	0	525	0	525	0	525	0	525	0	525	0	525	0	0	526.438	0.5625
18.3579	0	530	0	530	0	525	0	525	0	530	0	525	0	530	0	528	0	525	0	525	0	525	0	525	0	525	0	525	0	525	0	525	0	0	526.438	0.5625
18.3691	0	530	0	530	0	525	0	525	0	530	0	525	0	530	0	528	0	525	0	525	0	525	0	525	0	525	0	525	0	525	0	525	0	0	526.438	0.5625
18.3802	0	530	0	530	0	525	0	525	0	530	0	525	0	530	0	528	0	525	0	525	0	525	0	525	0	525	0	525	0	525	0	525	0	0	526.438	0.5625
18.3914	0	530	0	530	0	525	0	525	0	530	0	525	0	530	0	528	0	525	0	525	0	525	0	525	0	525	0	525	0	525	0	525	0	0	526.438	0.5625
18.4025	0	530	0	530	0	525	0	525	0	530	0	525	0	530	0	528	0	525	0	525	0	525	0	525	0	525	0	525	0	525	0	525	0	0	526.438	0.5625
18.4137	0	530	0	530	0	525	0	525	0	530	0	525	0	530	0	528	0	525	0	525	0	525	0	525	0	525	0	525	0	525	0	525	0	0	526.438	0.5625
18.4249	0	530	0	530	0	525	0	525	0	530	0	525	0	530	0	528	0	525	0	525	0	525	0	525	0	525	0	525	0	525	0	525	0	0	526.438	0.5625
18.436	0	530	0	530	0	525	0	525	0	530	0	525	0	530	0	528	0	525	0	525	0	525	0	525	0	525	0	525	0	525	0	525	0	0	526.438	0.5625
18.4472	0	530	0	530	0	525	0	525	0	530	0	525	0	530	0	528	0	525	0	525	0	525	0	525	0	525	0	525	0	525	0	525	0	0	526.438	0.5625
18.4583	0	530	0	530	0	525	0	525	0	530	0	525	0	530	0	528	0	525	0	525	0	525	0	525	0	525	0	525	0	525	0	525	0	0	526.438	0.5625
18.4695	0	530	0	530	0	525	0	525	0	530	0	525	0	530	0	528	0	525	0	525	0	525	0	525	0	525	0	525	0	525	0	525	0	0	526.438	0.5625
18.4807	0	530	0	530	0	525	0	525	0	530	0	525	0	530	0	528	0	525	0	525	0	525	0	525	0	525	0	525	0	525	0	525	0	0	526.438	0.5625
18.4918	0	530	0	530	0	525	0	525	0	530	0	525	0	530	0	528	0	525	0	525	0	525	0	525	0	525	0	525	0	525	0	525	0	0	526.438	0.5625
18.503	0	530	0	530	0	525	0	525	0	530	0	525	0	530	0	528	0	525	0	525	0	525	0	525	0	525	0	525	0	525	0	525	0	0	526.438	0.5625
18.5141	0	530	0	530	0	525	0	525	0	530	0	525	0	530	0	528	0	525	0	525	0	525	0	525	0	525	0	525	0	525	0	525	0	0	526.438	0.5625
18.5253	0	530	0	530	0	525	0	525	0	530	0	525	0	530	0	528	0	525	0	525	0	525	0	525	0	525	0	525	0	525	0	525	0	0	526.438	0.5625
18.5364	0	530	0	530	0	525	0	525	0	530	0	525	0	530	0	528	0	525	0	525	0	525	0	525	0	525	0	525	0	525	0	525	0	0	526.438	0.5625
18.5476	0	530	0	530	0	525	0	525	0	530	0	525	0	530	0	528	0	525	0	525	0	525	0	525	0	525	0	525	0	525	0	525	0	0	526.438	0.5625
18.5588	0	530	0	530	0	525	0	525	0	530	0	525	0	530	0	528	0	525	0	525	0	525	0	525	0	525	0	525	0	525	0	525	0	0	526.438	0.5625
18.5699	0	530	0	530	0	525	0	525	0	530	0	525	0	530	0	528	0	525	0	525	0	525	0	525	0	525	0	525	0	525	0	525	0	0	526.438	0.5625
18.5811	0	530	0	530	0	525	0	525	0	530	0	525	0	530	0	528	0	525	0	525	0	525	0	525	0	525	0	525	0	525	0	525	0	0	526.438	0.5625
18.5922	0	530	0	530	0	525	0	525	0	530	0	525	0	530	0	528	0	525	0	525	0	525	0	525	0	525	0	525	0	525	0	525	0	0	526.438	0.5625
18.6034	0	530	0	530	0	525	0	525	0	530	0	525	0	530	0	528	0	525	0	525	0	525	0	525	0	525	0	525	0	525	0	525	0	0	526.438	0.5625
18.6146	0	530	0	530	0	525	0	525	0	530	0	525	0	530	0	528	0	525	0	525	0	525	0	525	0	525	0	525	0	525	0	525	0	0	526.438	0.5625
18.6257	0	530	0	530	0	525	0	525	0	530	0	525	0	530	0	528	0	525	0	525	0	525	0	525	0	525	0	525	0	525	0	525	0	0	526.438	0.5625
18.6369	0	530	0	530	0	525	0	525	0	530	0	525	0	530	0	528	0	525	0	525	0	525	0	525	0	525	0	525	0	525	0	525	0	0	526.438	0.5625
18.648	0	530	0	530	0	525	0	525	0	530	0	525	0	530	0	528	0	525	0	525	0	525	0	525	0	525	0	525	0	525	0	525	0	0	526.438	0.5625
18.6592	0	530	0	530	0	525	0	525	0	530	0	525	0	530	0	528	0	525	0	525	0	525	0	525	0	525	0	525	0	525	0	525	0	0	526.438	0.5625
18.6704	0	530	0	530	0	525	0	525	0	530	0	525	0	530	0	528	0	525	0	525	0	525	0	525	0	525	0	525	0	525	0	525	0	0	526.438	0.5625
18.6815	0	530	0	530	0	525	0	525	0	530	0	525	0	530	0	528	0	525	0	525	0	525	0	525	0	525	0	525	0	525	0	525	0	0	526.438	0.5625
18.6927	0	530	0	530	0	525	0	525	0	530	0	525	0	530	0	528	0	525	0	525	0	525	0	525	0	525	0	525	0	525	0	525	0	0	526.438	0.5625
18.7038	0	530	0	530	0	525	0	525	0	530	0	525	0	530	0	528	0	525	0	525	0	525	0	525	0	525	0	525	0	525	0	525	0	0	526.438	0.5625
18.715	0	530	0	530	0	525	0	525	0	530	0	525	0	530	0	528	0	525	0	525	0	525	0	525	0	525	0	525	0	525	0	525	0	0	526.438	0.5625
18.7262	0	530	0	530	0	525	0	525	0	530	0	525	0	530	0	528	0	525	0	525	0	525	0	525	0	525	0	525	0	525	0	525	0	0	526.438	0.5625
18.7373	0	530	0	530	0	525	0	525	0	530	0	525	0	530	0	528	0	525	0	525	0	525	0	525	0	525	0	525	0	525	0	525	0	0	526.438	0.5625
18.7485	0	530	0	530	0	525	0	525	0	530	0	525	0	530	0	528	0	525	0	525	0	525	0	525	0	525	0	525	0	525	0	525	0	0	526.438	0.5625
18.7596	0	530	0	530	0	525	0	525	0	530	0	525	0	530	0	528	0	525	0	525	0	525	0	525	0	525	0	525	0	525	0	525	0	0	526.438	0.5625
18.7708	0	530	0	530	0	525	0	525	0	530	0	525	0	530	0	528	0	525	0	525	0	525	0	525	0	525	0	525	0	525	0	525	0	0	526.438	0.5625
18.782	0	530	0	530	0	525	0	525	0	530	0	525	0	530	0	528	0	525	0	525	0	525	0	525	0	525	0	525	0	525	0	525	0	0	526.438	0.5625
18.7931	0	530	0	530	0	525	0	525	0	530	0	525	0	530	0	528	0	525	0	525	0	525	0	525	0	525	0	525	0	525	0	525	0	0	526.438	0.5625
18.8043	0	530	0	530	0	525	0	525	0	530	0	525	0	530	0	528	0	525	0	525	0	525	0	525	0	525	0	525	0	525	0	525	0	0	526.438	0.5625
18.8154	0	530	0	530	0	525	0	525	0	530	0	525	0	530	0	528	0	525	0	525	0	525	0	525	0	525	0	525	0	525	0	525	0	0	526.438	0.5625
18.8266	0	530	0	530	0	525	0	525	0	530	0	525	0	530	0	528	0	525	0	525	0	525	0	525	0	525	0	525	0	525	0	525	0	0	526.438	0.5625
18.8378	0	530	0	530	0	525	0	525	0	530	0	525	0	530	0	528	0	525	0	525	0	525	0	525	0	525	0	525	0	525	0	525	0	0	526.438	0.5625
18.8489	0	530	0	530	0	525	0	525	0	530	0	525	0	530	0	528	0	525	0	525	0	525	0	525	0	525	0	525	0	525	0	525	0	0	526.438	0.5625
18.8601	0	530	0	530	0	525	0	525	0	530	0	525	0	530	0	528	0	525	0	525	0	525	0	525	0	525	0	525	0	525	0	525	0	0	526.438	0.5625
18.8712	0	530	0	530	0	525	0	525	0	530	0	525	0	530	0	528	0	525	0	525	0	525	0	525	0	525	0	525	0	525	0	525	0	0	526.438	0.5625
18.8824	0	530	0	530	0	525	0	525	0	530	0	525	0	530	0	528	0	525	0	525	0	525	0	525	0	525	0	525	0	525	0	525	0	0	526.438	0.5625
18.8936	0	530	0	530	0	525	0	525	0	530	0	525	0	530	0	528	0	525	0	525	0	525	0	525	0	525	0	525	0	525	0	525	0	0	526.438	0.5625
18.9047	0	530	0	530	0	525	0	525	0	530	0	525	0	530	0	528	0	525	0	525	0	525	0	525	0	525	0	525	0	525	0	525	0	0	526.438	0.5625
18.9159	0	530	0	530	0	525	0	525	0	530	0	525	0	530	0	528	0	525	0	525	0	525	0	525	0	525	0	525	0	525	0	525	0	0	526.438	0.5625
18.927	0	530	0	530	0	525	0	525	0	530	0	525	0	530	0	528	0	525	0	525	0	525	0	525	0	525	0	525	0	525	0	525	0	0	526.438	0.5625
18.9382	0	530	0	530	0	525	0	525	0	530	0	525	0	530	0	528	0	525	0	525	0	525	0	525	0	525	0	525	0	525	0	525	0	0	526.438	0.5625
18.9494	0	530	0	530	0	525	0	525	0	530	0	525	0	530	0	528	0	525	0	525	0	525	0	525	0	525	0	525	0	525	0	525	0	0	526.438	0.5625
18.9605	0	530	0	530	0	525	0	525	0	530	0	525	0	530	0	528	0	525	0	525	0	525	0	525	0	525	0	525	0	525	0	525	0	0	526.438	0.5625
18.9717	0	530	0	530	0	525	0	525	0	530	0	525	0	530	0	528	0	525	0	525	0	525	0	525	0	525	0	525	0	525	0	525	0	0	526.438	0.5625
18.9828	0	530	0	530	0	525	0	525	0	530	0	525	0	530	0	528	0	525	0	525	0	525	0	525	0	525	0	525	0	525	0	525	0	0	526.438	0.5625
18.994	0	530	0	530	0	525	0	525	0	530	0	525	0	530	0	528	0	525	0	525	0	525	0	525	0	525	0	525	0	525	0	525	0	0	526.438	0.5625
19.0052	0	530	0	530	0	525	0	525	0	530	0	525	0	530	0	528	0	525	0	525	0	525	0	525	0	525	0	525	0	525	0	525	0	0	526.438	0.5625
19.0163	0	530	0	530	0	525	0	525	0	530	0	525	0	530	0	528	0	525	0	525	0	525	0	525	0	525	0	525	0	525	0	525	0	0	526.438	0.5625
19.0275	0	530	0	530	0	525	0	525	0	530	0	525	0	530	0	528	0	525	0	525	0	525	0	525	0	525	0	525	0	525	0	525	0	0	526.438	0.5625
19.0386	0	530	0	530	0	525	0	525	0	530	0	525	0	530	0	528	0	525	0	525	0	525	0	525	0	525	0	525	0	525	0	525	0	0	526.438	0.5625
19.0498	0	530	0	530	0	525	0	525	0	530	0	525	0	530	0	528	0	525	0	525	0	525	0	525	0	525	0	525	0	525	0	525	0	0	526.438	0.5625
19.061	0	530	0	530	0	525	0	525	0	530	0	525	0	530	0	528	0	525	0	525	0	525	0	525	0	525	0	525	0	525	0	525	0	0	526.438	0.5625
19.0721	0	530	0	530	0	525	0	525	0	530	0	525	0	530	0	528	0	525	0	525	0	525	0	525	0	525	0	525	0	525	0	525	0	0	526.438	0.5625
19.0833	0	530	0	530	0	525	0	525	0	530	0	525	0	530	0	528	0	525	0	525	0	525	0	525	0	525	0	525	0	525	0	525	0	0	526.438	0.5625
19.0944	0	530	0	530	0	525	0	525	0	530	0	525	0	530	0	528	0	525	0	525	0	525	0	525	0	525	0	525	0	525	0	525	0	0	526.438	0.5625
19.1056	0	530	0	530	0	525	0	525	0	530	0	525	0	530	0	528	0	525	0	525	0	525	0	525	0	525	0	525	0	525	0	525	0	0	526.438	0.5625
19.1168	0	530	0	530	0	525	0	525	0	530	0	525	0	530	0	528	0	525	0	525	0	525	0	525	0	525	0	525	0	525	0	525	0	0	526.438	0.5625
19.1279	0	530	0	530	0	525	0	525	0	530	0	525	0	530	0	528	0	525	0	525	0	525	0	525	0	525	0	525	0	525	0	525	0	0	526.438	0.5625
19.1391	0	530	0	530	0	525	0	525	0	530	0	525	0	530	0	528	0	525	0	525	0	525	0	525	0	525	0	525	0	525	0	525	0	0	526.438	0.5625
19.1502	0	530	0	530	0	525	0	525	0	530	0	525	0	530	0	528	0	525	0	525	0	525	0	525	0	525	0	525	0	525	0	525	0	0	526.438	0.5625
19.1614	0	530	0	530	0	525	0	525	0	530	0	525	0	530	0	528	0	525	0	525	0	525	0	525	0	525	0	525	0	525	0	525	0	0	526.438	0.5625
19.1726	0	530	0	530	0	525	0	525	0	530	0	525	0	530	0	528	0	525	0	525	0	525	0	525	0	525	0	525	0	525	0	525	0	0	526.438	0.5625
19.1837	0	530	0	530	0	525	0	525	0	530	0	525	0	530	0	528	0	525	0	525	0	525	0	525	0	525	0	525	0	525	0	525	0	0	526.438	0.5625
19.1949	0	530	0	530	0	525	0	525	0	530	0	525	0	530	0	528	0	525	0	525	0	525	0	525	0	525	0	525	0	525	0	525	0	0	526.438	0.5625
19.206	0	530	0	530	0	525	0	525	0	530	0	525	0	530	0	528	0	525	0	525	0	525	0	525	0	525	0	525	0	525	0	525	0	0	526.438	0.5625
19.2172	0	530	0	530	0	525	0	525	0	530	0	525	0	530	0	528	0	525	0	525	0	525	0	525	0	525	0	525	0	525	0	525	0	0	526.438	0.5625
19.2284	0	530	0	530	0	525	0	525	0	530	0	525	0	530	0	528	0	525	0	525	0	525	0	525	0	525	0	525	0	525	0	525	0	0	526.438	0.5625
19.2395	0	530	0	530	0	525	0	525	0	530	0	525	0	530	0	528	0	525	0	525	0	525	0	525	0	525	0	525	0	525	0	525	0	0	526.438	0.5625
19.2507	0	530	0	530	0	525	0	525	0	530	0	525	0	530	0	528	0	525	0	525	0	525	0	525	0	525	0	525	0	525	0	525	0	0	526.438	0.5625
19.2618	0	530	0	530	0	525	0	525	0	530	0	525	0	530	0	528	0	525	0	525	0	525	0	525	0	525	0	525	0	525	0	525	0	0	526.438	0.5625
19.273	0	530	0	530	0	525	0	525	0	530	0	525	0	530	0	528	0	525	0	525	0	525	0	525	0	525	0	525	0	525	0	525	0	0	526.438	0.5625
19.2842	0	530	0	530	0	525	0	525	0	530	0	525	0	530	0	528	0	525	0	525	0	525	0	525	0	525	0	525	0	525	0	525	0	0	526.438	0.5625
19.2953	0	530	0	530	0	525	0	525	0	530	0	525	0	530	0	528	0	525	0	525	0	525	0	525	0	525	0	525	0	525	0	525	0	0	526.438	0.5625
19.3065	0	530	0	530	0	525	0	525	0	530	0	525	0	530	0	528	0	525	0	525	0	525	0	525	0	525	0	525	0	525	0	525	0	0	526.438	0.5625
19.3176	0	530	0	530	0	525	0	525	0	530	0	525	0	530	0	528	0	525	0	525	0	525	0	525	0	525	0	525	0	525	0	525	0	0	526.438	0.5625
19.3288	0	530	0	530	0	525	0	525	0	530	0	525	0	530	0	528	0	525	0	525	0	525	0	525	0	525	0	525	0	525	0	525	0	0	526.438	0.5625
19.34	0	530	0	530	0	525	0	525	0	530	0	525	0	530	0	528	0	525	0	525	0	525	0	525	0	525	0	525	0	525	0	525	0	0	526.438	0.5625
19.3511	0	530	0	530	0	525	0	525	0	530	0	525	0	530	0	528	0	525	0	525	0	525	0	525	0	525	0	525	0	525	0	525	0	0	526.438	0.5625
19.3623	0	530	0	530	0	525	0	525	0	530	0	525	0	530	0	528	0	525	0	525	0	525	0	525	0	525	0	525	0	525	0	525	0	0	526.438	0.5625
19.3734	0	530	0	530	0	525	0	525	0	530	0	525	0	530	0	528	0	525	0	525	0	525	0	525	0	525	0	525	0	525	0	525	0	0	526.438	0.5625
19.3846	0	530	0	530	0	525	0	525	0	530	0	525	0	530	0	528	0	525	0	525	0	525	0	525	0	525	0	525	0	525	0	525	0	0	526.438	0.5625
19.3958	0	530	0	530	0	525	0	525	0	530	0	525	0	530	0	528	0	525	0	525	0	525	0	525	0	525	0	525	0	525	0	525	0	0	526.438	0.5625
19.4069	0	530	0	530	0	525	0	525	0	530	0	525	0	530	0	528	0	525	0	525	0	525	0	525	0	525	0	525	0	525	0	525	0	0	526.438	0.5625
19.4181	0	530	0	530	0	525	0	525	0	530	0	525	0	530	0	528	0	525	0	525	0	525	0	525	0	525	0	525	0	525	0	525	0	0	526.438	0.5625
19.4292	0	530	0	530	0	525	0	525	0	530	0	525	0	530	0	528	0	525	0	525	0	525	0	525	0	525	0	525	0	525	0	525	0	0	526.438	0.5625
19.4404	0	530	0	530	0	525	0	525	0	530	0	525	0	530	0	528	0	525	0	525	0	525	0	525	0	525	0	525	0	525	0	525	0	0	526.438	0.5625
19.4516	0	530	0	530	0	525	0	525	0	530	0	525	0	530	0	528	0	525	0	525	0	525	0	525	0	525	0	525	0	525	0	525	0	0	526.438	0.5625
19.4627	0	530	0	530	0	525	0	525	0	530	0	525	0	530	0	528	0	525	0	525	0	525	0	525	0	525	0	525	0	525	0	525	0	0	526.438	0.5625
19.4739	0	530	0	530	0	525	0	525	0	530	0	525	0	530	0	528	0	525	0	525	0	525	0	525	0	525	0	525	0	525	0	525	0	0	526.438	0.5625
19.485	0	530	0	530	0	525	0	525	0	530	0	525	0	530	0	528	0	525	0	525	0	525	0	525	0	525	0	525	0	525	0	525	0	0	526.438	0.5625
19.4962	0	530	0	530	0	525	0	525	0	530	0	525	0	530	0	528	0	525	0	525	0	525	0	525	0	525	0	525	0	525	0	525	0	0	526.438	0.5625
19.5074	0	530	0	530	0	525	0	525	0	530	0	525	0	530	0	528	0	525	0	525	0	525	0	525	0	525	0	525	0	525	0	525	0	0	526.438	0.5625
19.5185	0	530	0	530	0	525	0	525	0	530	0	525	0	530	0	528	0	525	0	525	0	525	0	525	0	525	0	525	0	525	0	525	0	0	526.438	0.5625
19.5297	0	530	0	530	0	525	0	525	0	530	0	525	0	530	0	528	0	525	0	525	0	525	0	525	0	525	0	525	0	525	0	525	0	0	526.438	0.5625
19.5408	0	530	0	530	0	525	0	525	0	530	0	525	0	530	0	528	0	525	0	525	0	525	0	525	0	525	0	525	0	525	0	525	0	0	526.438	0.5625
19.552	0	530	0	530	0	525	0	525	0	530	0	525	0	530	0	528	0	525	0	525	0	525	0	525	0	525	0	525	0	525	0	525	0	0	526.438	0.5625
19.5632	0	530	0	530	0	525	0	525	0	530	0	525	0	530	0	528	0	525	0	525	0	525	0	525	0	525	0	525	0	525	0	525	0	0	526.438	0.5625
19.5743	0	530	0	530	0	525	0	525	0	530	0	525	0	530	0	528	0	525	0	525	0	525	0	525	0	525	0	525	0	525	0	525	0	0	526.438	0.5625
19.5855	0	530	0	530	0	525	0	525	0	530	0	525	0	530	0	528	0	525	0	525	0	525	0	525	0	525	0	525	0	525	0	525	0	0	526.438	0.5625
19.5966	0	530	0	530	0	525	0	525	0	530	0	525	0	530	0	528	0	525	0	525	0	525	0	525	0	525	0	525	0	525	0	525	0	0	526.438	0.5625
19.6078	0	530	0	530	0	525	0	525	0	530	0	525	0	530	0	528	0	525	0	525	0	525	0	525	0	525	0	525	0	525	0	525	0	0	526.438	0.5625
19.619	0	530	0	530	0	525	0	525	0	530	0	525	0	530	0	528	0	525	0	525	0	525	0	525	0	525	0	525	0	525	0	525	0	0	526.438	0.5625
19.6301	0	530	0	530	0	525	0	525	0	530	0	525	0	530	0	528	0	525	0	525	0	525	0	525	0	525	0	525	0	525	0	525	0	0	526.438	0.5625
19.6413	0	530	0	530	0	525	0	525	0	530	0	525	0	530	0	528	0	525	0	525	0	525	0	525	0	525	0	525	0	525	0	525	0	0	526.438	0.5625
19.6524	0	530	0	530	0	525	0	525	0	530	0	525	0	530	0	528	0	525	0	525	0	525	0	525	0	525	0	525	0	525	0	525	0	0	526.438	0.5625
19.6636	0	530	0	530	0	525	0	525	0	530	0	525	0	530	0	528	0	525	0	525	0	525	0	525	0	525	0	525	0	525	0	525	0	0	526.438	0.5625
19.6748	0	530	0	530	0	525	0	525	0	530	0	525	0	530	0	528	0	525	0	525	0	525	0	525	0	525	0	525	0	525	0	525	0	0	526.438	0.5625
19.6859	0	530	0	530	0	525	0	525	0	530	0	525	0	530	0	528	0	525	0	525	0	525	0	525	0	525	0	525	0	525	0	525	0	0	526.438	0.5625
19.6971	0	530	0	530	0	525	0	525	0	530	0	525	0	530	0	528	0	525	0	525	0	525	0	525	0	525	0	525	0	525	0	525	0	0	526.438	0.5625
19.7082	0	530	0	530	0	525	0	525	0	530	0	525	0	530	0	528	0	525	0	525	0	525	0	525	0	525	0	525	0	525	0	525	0	0	526.438	0.5625
19.7194	0	530	0	530	0	525	0	525	0	530	0	525	0	530	0	528	0	525	0	525	0	525	0	525	0	525	0	525	0	525	0	525	0	0	526.438	0.5625
19.7305	0	530	0	530	0	525	0	525	0	530	0	525	0	530	0	528	0	525	0	525	0	525	0	525	0	525	0	525	0	525	0	525	0	0	526.438	0.5625
19.7417	0	530	0	530	0	525	0	525	0	530	0	525	0	530	0	528	0	525	0	525	0	525	0	525	0	525	0	525	0	525	0	525	0	0	526.438	0.5625
19.7529	0	530	0	530	0	525	0	525	0	530	0	525	0	530	0	528	0	525	0	525	0	525	0	525	0	525	0	525	0	525	0	525	0	0	526.438	0.5625
19.764	0	530	0	530	0	525	0	525	0	530	0	525	0	530	0	528	0	525	0	525	0	525	0	525	0	525	0	525	0	525	0	525	0	0	526.438	0.5625
19.7752	0	530	0	530	0	525	0	525	0	530	0	525	0	530	0	528	0	525	0	525	0	525	0	525	0	525	0	525	0	525	0	525	0	0	526.438	0.5625
19.7863	0	530	0	530	0	525	0	525	0	530	0	525	0	530	0	528	0	525	0	525	0	525	0	525	0	525	0	525	0	525	0	525	0	0	526.438	0.5625
19.7975	0	530	0	530	0	525	0	525	0	530	0	525	0	530	0	528	0	525	0	525	0	525	0	525	0	525	0	525	0	525	0	525	0	0	526.438	0.5625
19.8087	0	530	0	530	0	525	0	525	0	530	0	525	0	530	0	528	0	525	0	525	0	525	0	525	0	525	0	525	0	525	0	525	0	0	526.438	0.5625
19.8198	0	530	0	530	0	525	0	525	0	530	0	525	0	530	0	528	0	525	0	525	0	525	0	525	0	525	0	525	0	525	0	525	0	0	526.438	0.5625
19.831	0	530	0	530	0	525	0	525	0	530	0	525	0	530	0	528	0	525	0	525	0	525	0	525	0	525	0	525	0	525	0	525	0	0	526.438	0.5625
19.8421	0	530	0	530	0	525	0	525	0	530	0	525	0	530	0	528	0	525	0	525	0	525	0	525	0	525	0	525	0	525	0	525	0	0	526.438	0.5625
19.8533	0	530	0	530	0	525	0	525	0	530	0	525	0	530	0	528	0	525	0	525	0	525	0	525	0	525	0	525	0	525	0	525	0	0	526.438	0.5625
19.8645	0	530	0	530	0	525	0	525	0	530	0	525	0	530	0	528	0	525	0	525	0	525	0	525	0	525	0	525	0	525	0	525	0	0	526.438	0.5625
19.8756	0	530	0	530	0	525	0	525	0	530	0	525	0	530	0	528	0	525	0	525	0	525	0	525	0	525	0	525	0	525	0	525	0	0	526.438	0.5625
19.8868	0	530	0	530	0	525	0	525	0	530	0	525	0	530	0	528	0	525	0	525	0	525	0	525	0	525	0	525	0	525	0	525	0	0	526.438	0.5625
19.8979	0	530	0	530	0	525	0	525	0	530	0	525	0	530	0	528	0	525	0	525	0	525	0	525	0	525	0	525	0	525	0	525	0	0	526.438	0.5625
19.9091	0	530	0	530	0	525	0	525	0	530	0	525	0	530	0	528	0	525	0	525	0	525	0	525	0	525	0	525	0	525	0	525	0	0	526.438	0.5625
19.9203	0	530	0	530	0	525	0	525	0	530	0	525	0	530	0	528	0	525	0	525	0	525	0	525	0	525	0	525	0	525	0	525	0	0	526.438	0.5625
19.9314	0	530	0	530	0	525	0	525	0	530	0	525	0	530	0	528	0	525	0	525	0	525	0	525	0	525	0	525	0	525	0	525	0	0	526.438	0.5625
19.9426	0	530	0	530	0	525	0	525	0	530	0	525	0	530	0	528	0	525	0	525	0	525	0	525	0	525	0	525	0	525	0	525	0	0	526.438	0.5625
19.9537	0	530	0	530	0	525	0	525	0	530	0	525	0	530	0	528	0	525	0	525	0	525	0	525	0	525	0	525	0	525	0	525	0	0	526.438	0.5625
19.9649	0	530	0	530	0	525	0	525	0	530	0	525	0	530	0	528	0	525	0	525	0	525	0	525	0	525	0	525	0	525	0	525	0	0	526.438	0.5625
19.9761	0	530	0	530	0	525	0	525	0	530	0	525	0	530	0	528	0	525	0	525	0	525	0	525	0	525	0	525	0	525	0	525	0	0	526.438	0.5625
19.9872	0	530	0	530	0	525	0	525	0	530	0	525	0	530	0	528	0	525	0	525	0	525	0	525	0	525	0	525	0	525	0	525	0	0	526.438	0.5625
19.9984	0	530	0	530	0	525	0	525	0	530	0	525	0	530	0	528	0	525	0	525	0	525	0	525	0	525	0	525	0	525	0	525	0	0	526.438	0.5625
20.0095	0	530	0	530	0	525	0	525	0	530	0	525	0	530	0	528	0	525	0	525	0	525	0	525	0	525	0	525	0	525	0	525	0	0	526.438	0.5625
20.0207	0	530	0	530	0	525	0	525	0	530	0	525	0	530	0	528	0	525	0	525	0	525	0	525	0	525	0	525	0	525	0	525	0	0	526.438	0.5625
20.0319	0	530	0	530	0	525	0	525	0	530	0	525	0	530	0	528	0	525	0	525	0	525	0	525	0	525	0	525	0	525	0	525	0	0	526.438	0.5625
20.043	0	530	0	530	0	525	0	525	0	530	0	525	0	530	0	528	0	525	0	525	0	525	0	525	0	525	0	525	0	525	0	525	0	0	526.438	0.5625
20.0542	0	530	0	530	0	525	0	525	0	530	0	525	0	530	0	528	0	525	0	525	0	525	0	525	0	525	0	525	0	525	0	525	0	0	526.438	0.5625
20.0653	0	530	0	530	0	525	0	525	0	530	0	525	0	530	0	528	0	525	0	525	0	525	0	525	0	525	0	525	0	525	0	525	0	0	526.438	0.5625
20.0765	0	530	0	530	0	525	0	525	0	530	0	525	0	530	0	528	0	525	0	525	0	525	0	525	0	525	0	525	0	525	0	525	0	0	526.438	0.5625
20.0877	0	530	0	530	0	525	0	525	0	530	0	525	0	530	0	528	0	525	0	525	0	525	0	525	0	525	0	525	0	525	0	525	0	0	526.438	0.5625
20.0988	0	530	0	530	0	525	0	525	0	530	0	525	0	530	0	528	0	525	0	525	0	525	0	525	0	525	0	525	0	525	0	525	0	0	526.438	0.5625
20.11	0	530	0	530	0	525	0	525	0	530	0	525	0	530	0	528	0	525	0	525	0	525	0	525	0	525	0	525	0	525	0	525	0	0	526.438	0.5625
20.1211	0	530	0	530	0	525	0	525	0	530	0	525	0	530	0	528	0	525	0	525	0	525	0	525	0	525	0	525	0	525	0	525	0	0	526.438	0.5625
20.1323	0	530	0	530	0	525	0	525	0	530	0	525	0	530	0	528	0	525	0	525	0	525	0	525	0	525	0	525	0	525	0	525	0	0	526.438	0.5625
20.1435	0	530	0	530	0	525	0	525	0	530	0	525	0	530	0	528	0	525	0	525	0	525	0	525	0	525	0	525	0	525	0	525	0	0	526.438	0.5625
20.1546	0	530	0	530	0	525	0	525	0	530	0	525	0	530	0	528	0	525	0	525	0	525	0	525	0	525	0	525	0	525	0	525	0	0	526.438	0.5625
20.1658	0	530	0	530	0	525	0	525	0	530	0	525	0	530	0	528	0	525	0	525	0	525	0	525	0	525	0	525	0	525	0	525	0	0	526.438	0.5625
20.1769	0	530	0	530	0	525	0	525	0	530	0	525	0	530	0	528	0	525	0	525	0	525	0	525	0	525	0	525	0	525	0	525	0	0	526.438	0.5625
20.1881	0	530	0	530	0	525	0	525	0	530	0	525	0	530	0	528	0	525	0	525	0	525	0	525	0	525	0	525	0	525	0	525	0	0	526.438	0.5625
20.1993	0	530	0	530	0	525	0	525	0	530	0	525	0	530	0	528	0	525	0	525	0	525	0	525	0	525	0	525	0	525	0	525	0	0	526.438	0.5625
20.2104	0	530	0	530	0	525	0	525	0	530	0	525	0	530	0	528	0	525	0	525	0	525	0	525	0	525	0	525	0	525	0	525	0	0	526.438	0.5625
20.2216	0	530	0	530	0	525	0	525	0	530	0	525	0	530	0	528	0	525	0	525	0	525	0	525	0	525	0	525	0	525	0	525	0	0	526.438	0.5625
20.2327	0	530	0	530	0	525	0	525	0	530	0	525	0	530	0	528	0	525	0	525	0	525	0	525	0	525	0	525	0	525	0	525	0	0	526.438	0.5625
20.2439	0	530	0	530	0	525	0	525	0	530	0	525	0	530	0	528	0	525	0	525	0	525	0	525	0	525	0	525	0	525	0	525	0	0	526.438	0.5625
20.2551	0	530	0	530	0	525	0	525	0	530	0	525	0	530	0	528	0	525	0	525	0	525	0	525	0	525	0	525	0	525	0	525	0	0	526.438	0.5625
20.2662	0	530	0	530	0	525	0	525	0	530	0	525	0	530	0	528	0	525	0	525	0	525	0	525	0	525	0	525	0	525	0	525	0	0	526.438	0.5625
20.2774	0	530	0	530	0	525	0	525	0	530	0	525	0	530	0	528	0	525	0	525	0	525	0	525	0	525	0	525	0	525	0	525	0	0	526.438	0.5625
20.2885	0	530	0	530	0	525	0	525	0	530	0	525	0	530	0	528	0	525	0	525	0	525	0	525	0	525	0	525	0	525	0	525	0	0	526.438	0.5625
20.2997	0	530	0	530	0	525	0	525	0	530	0	525	0	530	0	528	0	525	0	525	0	525	0	525	0	525	0	525	0	525	0	525	0	0	526.438	0.5625
20.3109	0	530	0	530	0	525	0	525	0	530	0	525	0	530	0	528	0	525	0	525	0	525	0	525	0	525	0	525	0	525	0	525	0	0	526.438	0.5625
20.322	0	530	0	530	0	525	0	525	0	530	0	525	0	530	0	528	0	525	0	525	0	525	0	525	0	525	0	525	0	525	0	525	0	0	526.438	0.5625
20.3332	0	530	0	530	0	525	0	525	0	530	0	525	0	530	0	528	0	525	0	525	0	525	0	525	0	525	0	525	0	525	0	525	0	0	526.438	0.5625
20.3443	0	530	0	530	0	525	0	525	0	530	0	525	0	530	0	528	0	525	0	525	0	525	0	525	0	525	0	525	0	525	0	525	0	0	526.438	0.5625
20.3555	0	530	0	530	0	525	0	525	0	530	0	525	0	530	0	528	0	525	0	525	0	525	0	525	0	525	0	525	0	525	0	525	0	0	526.438	0.5625
20.3667	0	530	0	530	0	525	0	525	0	530	0	525	0	530	0	528	0	525	0	525	0	525	0	525	0	525	0	525	0	525	0	525	0	0	526.438	0.5625
20.3778	0	530	0	530	0	525	0	525	0	530	0	525	0	530	0	528	0	525	0	525	0	525	0	525	0	525	0	525	0	525	0	525	0	0	526.438	0.5625
20.389	0	530	0	530	0	525	0	525	0	530	0	525	0	530	0	528	0	525	0	525	0	525	0	525	0	525	0	525	0	525	0	525	0	0	526.438	0.5625
20.4001	0	530	0	530	0	525	0	525	0	530	0	525	0	530	0	528	0	525	0	525	0	525	0	525	0	525	0	525	0	525	0	525	0	0	526.438	0.5625
20.4113	0	530	0	530	0	525	0	525	0	530	0	525	0	530	0	528	0	525	0	525	0	525	0	525	0	525	0	525	0	525	0	525	0	0	526.438	0.5625
20.4225	0	530	0	530	0	525	0	525	0	530	0	525	0	530	0	528	0	525	0	525	0	525	0	525	0	525	0	525	0	525	0	525	0	0	526.438	0.5625
20.4336	0	530	0	530	0	525	0	525	0	530	0	525	0	530	0	528	0	525	0	525	0	525	0	525	0	525	0	525	0	525	0	525	0	0	526.438	0.5625
20.4448	0.27	530	0.97	530	1.66	525	-0.44	525	0.66	530	-0.67	525	-0.99	530	0.3	528	0.66	525	-0.12	525	1.19	525	1.06	525	0.66	525	0.86	525	0.15	525	-0.13	525	0.380625	0.180323	526.438	0.5625
20.4559	0.19	530	0.52	530	2.35	525	0.37	525	0.12	530	-0.15	525	-1.45	530	0.39	528	0.65	525	-0.24	525	1.2	525	1.42	525	0.45	525	0.81	525	0.15	525	0.21	525	0.436875	0.20479	526.438	0.5625
20.4671	0.14	530	1.54	530	1.09	523	-0.26	525	0.27	530	-0.54	525	-1.12	530	-0.09	528	0.47	525	0.13	525	1.42	524	1.2	524	0.27	525	0.75	525	0.56	525	-0.08	525	0.359375	0.180936	526.188	0.62061
20.4783	0.36	530	1.19	530	1.84	522	-0.51	525	0.14	530	0.14	525	-1.16	531	0.29	528	0.54	525	-0.04	525	1.33	523	0.91	523	0.55	525	0.66	525	0.14	525	0.21	525	0.411875	0.178396	526.062	0.703969
20.4894	-0.2	530	1.52	529	1.47	521	-0.07	525	0.45	530	-0.36	525	-1.25	532	0.5	528	0.51	525	-0.21	525	1.18	522	0.99	523	0.62	525	0.68	525	0.44	525	-0.14	525	0.383125	0.183132	525.938	0.760859
20.5006	0.33	530	1.39	528	1.53	520	-0.06	525	0.02	530	0.05	525	-1.17	533	0.06	528	0.45	525	0.28	525	1.02	521	0.93	523	0.5	525	0.62	525	0.36	525	-0.02	525	0.393125	0.161229	525.812	0.83276
20.5117	-0.13	530	1.07	527	1.53	519	0.04	525	0.38	530	-0.35	525	-0.91	534	0	528	0.42	525	0.22	525	1	520	0.96	523	0.72	525	0.73	525	0.52	525	0.08	525	0.3925	0.152874	525.688	0.916146
20.5229	-0.2	530	0.82	526	1.37	518	0.61	525	-0.18	530	-0.55	525	-0.67	534	0.29	528	0.57	525	-0.07	525	0.75	519	1.13	523	0.57	525	0.67	525	0.32	525	0.23	525	0.35375	0.143256	525.5	0.970395
20.5341	0.21	530	1.07	526	1.31	517	-0.17	525	-0.2	530	-0.31	525	-0.53	534	0.28	528	0.35	525	0.22	525	0.54	519	0.91	523	0.4	525	0.79	525	0.57	525	-0.06	525	0.33625	0.129479	525.438	1.00403
20.5452	0.22	530	0.49	526	0.93	516	0.23	525	0.72	530	-0.31	525	0.01	534	0.09	528	0.44	525	-0.15	525	0.79	519	0.97	523	0.54	525	0.82	525	0.34	525	-0.07	525	0.37875	0.099987	525.375	1.04033
20.5564	-0.09	530	0.58	526	0.45	516	0.06	525	0.9	530	-0.3	525	-0.17	534	0.12	528	0.45	525	0.03	525	0.8	519	1.01	523	0.44	525	0.74	525	0.54	525	0.15	525	0.356875	0.0994766	525.375	1.04033
20.5675	0.15	530	0.96	526	0.43	516	-0.22	525	0.46	530	-0.13	525	-0.53	534	0.17	528	0.44	525	0.15	525	0.63	519	0.79	523	0.54	525	0.73	525	0.44	525	-0.05	525	0.31	0.100743	525.375	1.04033
20.5787	-0.07	530	1.04	526	0.62	516	-0.37	525	-0.29	530	-0.11	525	-1.03	534	-0.09	528	0.56	525	0.04	525	0.81	519	1.13	523	0.59	525	0.54	525	0.29	525	0.02	525	0.23	0.142872	525.375	1.04033
20.5899	-0.03	530	0.55	526	0.38	516	-0.05	525	0.28	530	-0.04	525	-0.86	534	0.26	528	0.63	525	0.24	525	1.1	519	0.98	523	0.37	525	0.49	525	0.19	525	0.19	525	0.2925	0.112596	525.375	1.04033
20.601	0.1	530	0.26	526	1.16	516	-0.33	525	0.15	530	-0.27	525	-1.4	534	0.33	528	0.53	525	0.15	525	0.81	519	1.01	523	0.41	525	0.66	525	0.48	525	0.21	525	0.26625	0.150277	525.375	1.04033
20.6122	0.6	530	0.35	526	0.82	516	-0.94	525	-0.04	530	-0.22	525	-0.76	534	0.21	528	0.68	525	0.12	525	1.09	519	0.88	523	0.48	525	0.61	525	0.55	525	0.34	525	0.298125	0.140654	525.375	1.04033
20.6233	-0.3	530	0.64	526	0.53	516	0.47	525	0.15	530	-0.2	525	-0.77	534	0.09	528	0.51	525	-0.09	525	0.48	519	0.91	523	0.68	525	0.79	525	0.37	525	0.31	525	0.285625	0.111911	525.375	1.04033
20.6345	0.14	530	-0.24	526	0.48	516	-0.3	525	0.71	530	-0.27	525	-0.83	534	0.09	528	0.7	525	0.06	525	0.57	519	1.04	523	0.67	525	0.53	525	0.26	525	0.28	525	0.243125	0.120792	525.375	1.04033
20.6457	0.01	530	0.41	526	0.87	516	-0.29	525	0.04	530	-0.1	525	-1.3	534	0.1	528	0.19	525	0.13	525	0.84	519	0.92	523	0.59	525	1.07	525	-0.06	525	0.45	525	0.241875	0.145614	525.375	1.04033
20.6568	0.11	530	0.22	526	1.03	516	-0.33	525	-0.11	530	-0.17	525	-0.95	534	0.39	528	0.36	525	-0.15	525	0.67	519	0.9	523	0.34	525	0.83	525	0.2	525	0.37	525	0.231875	0.126788	525.375	1.04033
20.668	-0.1	530	0.65	526	0.15	516	-0.02	525	0.42	530	-0.53	525	-0.56	534	0.28	528	0.43	525	0.02	525	0.56	519	1.05	523	0.71	525	0.71	525	0.28	525	0.22	525	0.266875	0.109953	525.375	1.04033
20.6791	0.04	530	0.91	526	1.24	516	0.33	525	-0.3	530	0.4	525	-0.84	534	0.48	528	0.59	525	0.11	525	0.78	519	1.2	523	0.69	525	0.6	525	0.72	525	0.06	525	0.438125	0.134747	525.375	1.04033
20.6903	0.55	530	0.83	526	0.64	516	0.3	525	-0.06	530	-0.14	525	-0.46	534	-0.11	528	0.56	525	0.27	525	0.88	519	1.05	522	0.57	525	0.75	525	0.43	525	0.39	525	0.403125	0.104593	525.312	1.05166
20.7015	0.35	530	0.26	526	0.85	516	-0.55	525	0.2	530	-0.54	525	-0.41	534	0.25	528	0.26	525	0.23	525	0.95	519	1.35	521	0.6	525	0.75	525	0.52	525	0.02	525	0.318125	0.132238	525.25	1.06654
20.7126	0.11	530	0.79	526	0.49	516	0.48	525	0.69	530	0.13	525	0.33	534	0	528	0.36	525	0.43	525	0.8	519	0.7	520	0.91	525	0.63	525	0.68	525	0.07	525	0.475	0.0717461	525.188	1.08481
20.7238	0.01	530	0.48	526	0.61	516	-0.33	525	-0.13	530	-0.36	525	-0.77	534	0.19	528	0.49	525	0.13	525	0.97	519	1.28	520	0.63	525	0.76	525	0.32	525	-0.06	525	0.26375	0.133709	525.188	1.08481
20.7349	0.04	530	0.42	526	0.71	516	-0.12	525	0.46	530	0.13	525	-1.42	534	0.1	528	0.39	525	0.22	525	0.83	519	1	520	0.42	525	0.66	525	0.4	525	0.41	525	0.290625	0.135854	525.188	1.08481
20.7461	0.03	530	0.84	526	0.81	516	-0.66	525	0.57	530	-0.4	525	-0.87	534	0.07	528	0.36	525	0.01	525	0.88	519	0.86	519	0.34	525	0.73	525	0.67	525	0.68	525	0.3075	0.140468	525.125	1.10633
20.7573	0.65	530	1.25	526	0.88	516	-0.14	525	0.04	530	-0.79	525	-0.88	534	0.15	528	0.23	525	0.26	525	1.13	519	0.54	519	0.74	525	0.66	525	0.17	525	0.66	525	0.346875	0.150182	525.125	1.10633
20.7684	-0.12	530	0.87	526	0.6	516	-0.29	525	0.76	530	0.14	525	-0.67	534	0.14	528	0.67	525	-0.04	525	0.88	519	0.94	519	0.62	525	0.47	525	0.57	525	0.33	525	0.366875	0.116818	525.125	1.10633
20.7796	0.07	530	0.39	526	0.52	516	-0.87	525	0.18	530	-0.2	525	-1.32	534	0.45	528	0.38	525	0.39	525	0.91	519	0.69	519	0.71	525	0.66	525	0.35	525	0.33	525	0.2275	0.14642	525.125	1.10633
20.7907	0.63	530	0.46	526	1.12	516	0.08	525	0.24	530	-0.3	525	-0.33	534	0.33	528	0.74	525	0.21	525	1.03	519	1.1	519	0.54	525	0.9	525	0.16	525	0.42	525	0.458125	0.112599	525.125	1.10633
20.8019	0.14	530	0.46	526	0.78	516	0.33	525	0.46	530	-0.13	525	-0.2	534	0.29	528	0.69	525	0.26	525	0.89	519	0.74	519	0.57	525	0.88	525	0.05	525	0.37	525	0.41125	0.0845866	525.125	1.10633
20.8131	-0.4	530	0.52	526	0.69	516	0.03	525	0.2	530	-0.22	525	-0.55	534	0.03	528	0.45	525	0.23	525	0.72	519	0.94	519	0.47	525	0.64	525	0.51	525	0.55	525	0.300625	0.106139	525.125	1.10633
20.8242	0.17	530	0.54	526	0.62	516	-0.54	525	0.1	530	0.27	525	-0.74	534	0.09	528	0.49	525	0.48	525	1.07	519	0.9	519	0.51	525	0.84	525	0.26	525	0.67	525	0.358125	0.1206	525.125	1.10633
20.8354	0.14	530	0.24	526	0.64	516	0.14	525	-0.06	530	-0.81	525	-1.13	534	0.15	528	0.23	525	0.14	525	1.24	519	0.84	519	0.52	525	0.44	525	0.59	525	0.48	525	0.236875	0.143265	525.125	1.10633
20.8465	0.41	530	1.26	526	0.44	516	0.22	525	0.4	530	-0.66	525	-0.81	534	0.1	528	0.92	525	0.15	525	1.16	518	0.92	519	0.64	525	0.71	525	0.34	525	0.54	525	0.42125	0.14145	525.062	1.13089
20.8577	0.04	530	0.37	526	0.77	516	0.08	525	0.32	530	0.08	525	0.33	534	0.06	528	0.38	525	0.28	525	0.84	517	0.89	519	0.49	525	0.66	525	0.33	525	0.47	525	0.399375	0.0687112	525	1.1583
20.8689	0.29	530	0.98	526	1.04	516	0.24	525	0.17	530	-0.93	525	-0.75	534	0.24	528	0.61	525	0.25	525	0.95	517	0.86	519	0.58	525	0.52	525	0.3	525	0.3	525	0.353125	0.13793	525	1.1583
20.88	-0.03	530	0.8	526	0.11	516	0.28	525	0.26	530	0.29	525	-0.46	534	0.2	528	0.55	525	-0.02	525	1.03	517	1.08	519	0.46	525	0.83	525	0.28	525	0.36	525	0.37625	0.102233	525	1.1583
20.8912	0.3	530	0.26	526	1.25	516	-0.14	525	0.39	530	-0.52	525	-0.49	534	0.06	528	0.32	525	0.38	525	1.03	517	0.74	519	0.88	525	0.72	525	0.63	525	0.44	525	0.390625	0.124216	525	1.1583
20.9023	0.22	530	0.15	526	0.81	516	-0.66	525	-0.08	530	-0.33	525	-0.72	534	0.21	528	0.42	525	0.32	525	0.85	516	1.24	519	0.66	525	0.85	525	0.55	525	0.48	525	0.310625	0.137333	524.938	1.18838
20.9135	-0.48	530	0.84	526	1.39	516	-0.1	525	0.3	530	-0.42	525	-0.32	534	0.4	528	0.44	525	0.19	525	0.75	516	0.83	519	0.52	525	0.5	525	0.27	525	0.62	525	0.358125	0.126056	524.938	1.18838
20.9246	0.2	530	0.88	526	0.69	516	-0.1	525	0.69	530	0.2	525	-1.09	534	-0.01	528	0.66	525	0.34	525	0.79	516	0.82	519	0.62	525	0.5	525	0.45	525	0.43	525	0.379375	0.121989	524.938	1.18838
20.9358	0.31	530	0.86	526	0.74	516	0.56	525	1	530	-0.25	525	-0.81	534	0.33	528	0.28	525	0.13	525	0.91	516	0.82	519	0.77	525	0.5	525	0.58	525	0.74	525	0.466875	0.118314	524.938	1.18838
20.947	0.86	530	0.22	526	1.17	516	0.01	525	0.64	530	-0.17	525	-0.29	534	0.23	528	0.43	525	0.21	525	1.08	516	1.06	519	0.73	525	0.51	525	0.35	525	0.48	525	0.47	0.109221	524.938	1.18838
20.9581	0.33	530	0.63	526	0.74	516	-0.15	525	0.31	530	0.11	525	-0.62	534	0.08	528	0.15	525	0.63	525	1.13	516	0.88	519	0.59	525	0.72	525	0.36	525	0.44	525	0.395625	0.106673	524.938	1.18838
20.9693	0.75	530	0.57	526	1.23	516	-0.65	525	0.88	530	-0.76	525	-0.89	534	0.18	528	0.27	525	0.12	525	1.05	515	1	519	0.53	525	0.83	525	0.04	525	0.44	525	0.349375	0.163313	524.875	1.22091
20.9804	0.26	530	0.36	526	0.56	516	-0.09	525	0.36	530	-0.98	525	-0.82	534	0.19	528	0.65	525	0.6	525	0.68	514	0.52	519	0.93	525	0.62	525	0.52	525	0.64	525	0.3125	0.13228	524.812	1.25572
20.9916	-0.28	530	0.56	526	0.5	516	-0.25	525	0.32	530	-0.29	525	-1.13	534	0.14	528	0.44	525	0.28	525	0.86	514	1.02	519	0.89	525	0.75	525	0.3	525	0.28	525	0.274375	0.13781	524.812	1.25572
21.0028	0.31	530	0	526	0.9	516	0.73	525	-0.72	530	-0.43	525	-0.67	534	0.25	528	0.24	525	0.21	525	0.81	514	1.1	519	0.76	525	1.07	525	0.3	525	0.48	525	0.33375	0.142627	524.812	1.25572
21.0139	0.28	530	-0.08	526	0.41	516	-0.57	525	0.77	530	-0.26	525	-0.79	534	-0.01	528	0.43	525	0.37	525	0.81	514	0.86	518	0.66	525	0.74	525	0.34	525	0.61	525	0.285625	0.124927	524.75	1.27639
21.0251	-0.06	530	0.54	526	1.1	516	0.23	525	-0.01	530	-0.36	525	-0.56	534	0	528	0.54	525	0.22	525	0.65	514	0.86	518	1.1	525	0.76	525	0.28	525	0.55	525	0.365	0.121456	524.75	1.27639
21.0362	0.06	530	-0.1	526	1	516	-0.33	525	0.26	530	-0.3	525	-0.82	534	0.26	528	0.47	525	0.48	525	1	514	1	518	0.69	525	0.66	525	0.55	525	0.69	525	0.348125	0.132644	524.75	1.27639
21.0474	-0.08	530	1.21	526	1.16	515	-0.04	525	0.28	530	-0.3	525	-0.69	534	0.38	528	0.41	525	0.51	525	0.85	514	0.78	518	0.96	525	0.69	525	0.33	525	0.42	525	0.429375	0.130686	524.688	1.30614
21.0586	0.25	530	0.53	526	1.06	514	-0.35	525	0.5	530	-0.1	525	-0.58	534	0.16	528	0.56	525	0.46	525	0.59	514	1.22	518	0.76	525	0.66	525	0.15	525	0.71	525	0.41125	0.119146	524.625	1.33814
21.0697	0.7	530	0.56	526	0.67	513	-0.23	525	0.75	530	-0.04	525	-0.98	534	0.29	528	0.42	525	0.54	525	0.8	514	0.96	518	0.99	525	0.98	525	0.27	525	0.45	525	0.445625	0.128812	524.562	1.37225
21.0809	0.27	530	0.41	526	0.97	513	0.62	525	-0.08	530	-0.55	525	-1.11	534	0.09	528	0.46	525	0.52	525	0.85	514	1.15	518	1.07	525	0.82	525	0.28	525	0.61	525	0.39875	0.149529	524.562	1.37225
21.092	-0.53	530	0.52	526	0.37	513	-0.3	525	0.27	530	0.01	525	-0.64	534	0.24	528	0.35	525	0.6	525	0.89	514	1.08	518	1.23	525	0.64	525	0.22	525	0.77	525	0.3575	0.133515	524.562	1.37225
21.1032	0.26	530	0.16	526	0.97	513	-0.15	525	0.03	530	-0.25	525	-0.92	534	0.08	528	0.25	525	0.53	525	1.16	514	1.01	517	0.65	524	0.75	525	0.28	525	0.83	525	0.3525	0.136108	524.438	1.39334
21.1144	0.09	530	0.28	526	0.67	513	-0.53	525	-0.49	530	0.02	525	-0.67	534	0.03	528	0.43	525	0.29	525	0.83	514	0.94	516	0.87	524	0.76	525	0.43	525	0.85	525	0.3	0.131498	524.375	1.41679
21.1255	-0.12	530	0.49	526	0.31	513	0.24	525	0.32	530	0.33	525	-0.72	534	0.01	528	0.44	525	0.29	525	0.85	514	0.74	516	0.57	524	0.91	525	0.39	525	0.52	525	0.348125	0.0983667	524.375	1.41679
21.1367	-0.15	530	0.16	526	0.89	513	0.55	525	0.1	530	0.12	525	-1.33	534	0	528	0.49	525	0.4	525	1.07	514	0.94	516	0.93	524	1.02	525	0.36	525	0.61	525	0.385	0.15	524.375	1.41679
21.1478	0.03	530	0.16	526	0.98	513	0.39	525	0.16	530	-0.51	525	-0.29	534	0.04	528	0.39	525	0.51	525	0.59	514	0.95	516	0.58	524	0.55	525	0.67	525	0.74	525	0.37125	0.104151	524.375	1.41679
21.159	0.34	530	-0.06	526	1.54	513	-0.26	525	0.5	530	-0.35	525	-0.9	534	0.07	528	0.34	525	0.3	525	0.6	514	0.72	516	0.93	524	1.02	525	0.12	525	1.04	525	0.371875	0.153004	524.375	1.41679
21.1702	0.14	530	0.32	526	0.98	513	-0.2	525	0.6	530	-0.29	525	-1.52	534	0.31	528	0.54	525	0.5	525	0.83	514	1.17	516	1.09	524	0.76	525	0.17	525	0.76	525	0.385	0.165492	524.375	1.41679
21.1813	0.68	530	1.04	526	0.57	513	0.02	525	0.61	530	-0.15	525	-0.44	534	0.38	528	0.28	525	0.65	525	0.72	514	1.05	516	0.79	524	0.43	525	0.34	525	0.59	525	0.4725	0.100505	524.375	1.41679
21.1925	0.22	530	0.13	526	0.95	513	-0.36	525	0.1	530	-0.01	525	-0.38	534	0.31	528	0.25	525	0.51	525	0.62	514	0.82	515	1.04	524	0.93	525	0.45	525	0.69	525	0.391875	0.109838	524.312	1.44256
21.2036	-0.14	530	0.78	526	-0.22	513	-0.24	525	0.28	530	-0.88	525	-0.13	534	0.04	528	0.73	525	0.8	525	1.1	514	0.83	515	0.84	524	0.79	525	0.42	525	0.62	525	0.35125	0.138347	524.312	1.44256
21.2148	0.86	530	0.53	526	0.38	513	0.19	525	-0.16	530	-0.19	525	-0.72	534	0.2	528	0.68	525	0.37	525	1.1	514	1.06	515	1.05	524	0.67	525	0.27	525	0.56	525	0.428125	0.125154	524.312	1.44256
21.226	0.13	530	0.67	526	0.55	513	0.05	525	0.49	530	-0.29	525	-1.5	534	0.23	528	0.27	525	0.12	525	0.84	513	1.05	515	0.78	524	0.86	525	0.41	525	0.48	525	0.32125	0.149841	524.25	1.47337
21.2371	0.28	530	0.14	526	0.41	513	-0.11	525	0.35	530	0.32	525	-0.93	534	0.16	528	0.44	525	0.38	525	0.83	513	0.8	514	0.79	524	0.85	525	0.5	525	0.79	525	0.375	0.112383	524.188	1.50061
21.2483	0.13	530	0.9	526	0.44	513	0.69	525	0.34	530	-0.16	525	-1.11	534	0.03	528	0.68	525	0.7	525	0.77	513	0.88	514	0.97	524	0.7	525	0.24	525	0.54	525	0.42125	0.131202	524.188	1.50061
21.2594	0.61	530	0.59	526	0.48	513	0.36	525	0.2	530	-0.28	525	-0.75	534	0.01	528	0.62	525	0.59	525	0.51	513	1.09	514	0.65	524	0.55	525	0.52	525	0.71	525	0.40375	0.10865	524.188	1.50061
21.2706	0.49	530	0.7	526	0.75	513	0.42	525	0.56	530	-0.69	525	-1.48	534	0.17	528	0.32	525	0.47	525	0.7	513	0.97	514	0.79	524	0.88	525	0.16	525	0.62	525	0.364375	0.157008	524.188	1.50061
21.2818	0.57	530	1.25	526	0.92	513	-0.08	525	0.19	530	-0.23	525	-0.91	534	0.17	528	0.46	525	0.3	525	0.9	513	0.81	514	0.95	524	0.77	525	0.45	525	0.71	525	0.451875	0.135229	524.188	1.50061
21.2929	0.26	530	0.6	526	1.18	513	-0.3	525	-0.08	530	0	525	-0.72	534	0.17	528	0.41	525	0.51	525	0.92	513	0.95	514	0.86	524	0.64	525	0.28	525	0.52	525	0.3875	0.124771	524.188	1.50061
21.3041	0.21	530	1.37	526	0.76	513	0.02	525	0.13	530	0.01	525	-0.57	534	0.45	528	0.4	525	0.46	525	0.51	513	1.19	514	0.88	524	0.83	525	0.36	525	0.95	525	0.4975	0.122924	524.188	1.50061
21.3152	-0.05	530	0.28	526	0.28	513	0	525	0.18	530	0.4	525	-0.47	534	0.32	528	0.2	525	0.38	525	0.77	513	1.01	514	0.87	524	0.8	525	0.47	525	0.81	525	0.390625	0.0979986	524.188	1.50061
21.3264	-0.24	530	0.79	526	0.75	513	0.38	525	-0.11	530	-0.87	525	-0.76	534	0.43	528	0.57	525	0.53	525	1.11	513	0.91	513	0.69	524	0.71	525	0.32	525	0.73	525	0.37125	0.144285	524.125	1.52991
21.3376	-0.07	530	-0.15	526	-0.03	513	-0.3	525	0.44	530	0.43	525	-1.21	534	0.31	528	0.45	525	0.53	525	0.68	513	0.93	513	0.76	524	0.92	525	0.5	525	0.64	525	0.301875	0.136828	524.125	1.52991
21.3487	0.12	530	0.68	526	0.76	513	-0.63	525	-0.69	530	-0.43	525	-1.18	534	0.26	528	0.36	525	0.47	525	0.88	513	0.66	513	1.06	524	0.73	525	0.39	525	0.68	525	0.2575	0.162569	524.125	1.52991
21.3599	-0.28	530	0.31	526	1.06	513	-0.01	525	0.03	530	-0.27	525	-0.45	535	0.36	528	0.49	525	0.78	525	0.86	513	0.78	513	0.98	524	0.73	525	0.57	525	0.7	525	0.415	0.119951	524.188	1.55783
21.371	0.14	530	0.97	526	-0.02	513	-0.2	525	0.01	530	-0.18	525	-1.45	535	0.18	528	0.34	525	0.61	525	0.82	513	0.94	513	1.11	524	0.64	525	0.19	525	0.8	525	0.30625	0.158498	524.188	1.55783
21.3822	0.8	530	0.28	526	0.78	513	-0.19	525	0.18	530	-0.13	525	-0.48	535	0.16	528	0.24	525	0.59	525	1.21	513	1.09	513	0.77	524	0.64	525	0.29	525	0.78	525	0.438125	0.118143	524.188	1.55783
21.3934	0.11	530	0.7	526	0.76	513	0.47	525	0.67	530	0.32	525	-1.08	535	0.29	528	0.32	525	0.49	525	0.78	513	0.93	513	1.26	524	0.89	525	0.49	525	0.96	525	0.5225	0.130568	524.188	1.55783
21.4045	-0.05	530	1.12	526	0.45	513	0.3	525	0.28	530	-0.3	525	-0.9	535	0.16	528	0.39	525	0.29	525	0.86	513	1.4	513	1.06	524	0.93	525	0.59	525	0.8	525	0.46125	0.145226	524.188	1.55783
21.4157	-0.03	530	0.44	526	0.67	513	0.25	525	0.41	530	-0.56	525	-0.86	535	0.29	528	0.64	525	0.52	525	0.8	513	0.88	513	0.81	523	0.83	525	0.32	525	0.69	525	0.38125	0.124224	524.125	1.55958
21.4268	0.5	530	0.74	526	0.95	513	0	525	0.22	530	-0.83	525	-0.4	535	0.36	528	0.28	525	0.56	525	0.93	513	0.78	513	0.93	523	0.8	525	0.57	525	0.79	525	0.44875	0.12623	524.125	1.55958
21.438	-0.02	530	0.81	526	0.56	513	-0.08	525	0.52	530	-0.32	525	-1.35	535	0.2	528	0.68	525	0.58	525	0.9	513	0.99	513	1.08	523	0.91	525	0.33	525	0.85	525	0.415	0.156405	524.125	1.55958
21.4492	0.77	530	0.46	526	0.09	513	0.89	525	-0.3	530	0.25	525	-1.06	535	0.35	528	0.21	525	0.75	525	0.78	513	1.14	513	0.89	523	0.92	525	0.81	525	0.89	525	0.49	0.140875	524.125	1.55958
21.4603	0.24	530	0.6	526	0.58	513	0.05	525	0.02	530	-0.43	525	-0.87	536	0.23	528	0.3	525	0.51	525	1.07	513	1.11	513	0.87	523	0.74	525	0.6	525	0.82	525	0.4025	0.132657	524.188	1.5896
21.4715	0.35	530	0.9	526	0.17	513	0.07	525	0.48	530	-0.7	525	-1.27	536	0.17	528	0.57	525	0.92	525	0.78	513	1.3	512	0.78	523	0.63	525	0.31	525	0.92	525	0.39875	0.160753	524.125	1.61986
21.4826	0.54	530	0.38	526	0.72	513	0.23	525	-0.82	530	-0.14	525	-0.85	536	0.28	528	0.53	525	0.44	525	1.11	513	1.07	511	1.06	523	0.9	525	0.49	525	0.87	525	0.425625	0.149775	524.062	1.65194
21.4938	0.2	530	0.73	526	0.01	513	0.35	525	0.01	530	0.2	525	-0.84	536	0.17	528	0.39	525	0.51	525	0.89	513	1.1	510	0.94	523	0.87	525	0.47	525	0.62	525	0.41375	0.118869	524	1.68572
21.505	0.13	530	0.24	526	0.75	513	-0.48	525	0.26	530	-0.07	525	0.24	536	0.11	528	0.47	525	0.48	525	1.24	513	0.94	509	0.99	523	0.55	525	0.77	525	0.98	525	0.475	0.113798	523.938	1.72112
21.5161	0.14	530	0.58	526	0.97	513	-0.34	525	0.28	530	-0.66	525	-0.22	536	0.29	528	0.42	525	0.7	525	0.98	513	0.75	509	0.97	523	0.72	525	0.67	525	0.98	525	0.451875	0.126653	523.938	1.72112
21.5273	-0.1	530	0.71	526	0.33	513	0.78	525	0.12	530	-0.71	525	-0.3	536	0.15	528	0.41	525	0.65	525	0.99	513	0.88	509	0.95	523	0.7	525	0.58	525	0.86	525	0.4375	0.122704	523.938	1.72112
21.5384	-0.35	530	0.82	526	0.23	513	0.59	525	0.73	530	-0.39	525	-0.69	536	0.01	528	0.45	525	0.39	525	0.89	513	1.01	509	1.02	523	0.95	525	0.41	525	1.15	525	0.45125	0.139931	523.938	1.72112
21.5496	0.26	530	0.73	526	0.87	513	0.38	525	0.17	530	-0.1	525	-0.77	536	0.02	528	0.19	525	0.14	525	0.86	513	0.99	509	0.8	523	0.82	525	0.52	525	1.02	525	0.43125	0.12174	523.938	1.72112
21.5608	0.57	530	0.58	526	0.19	513	-0.21	525	0.08	530	-0.27	525	-0.78	536	0.41	528	0.2	525	0.32	525	1.07	513	0.85	509	1.08	523	0.85	525	0.57	525	0.82	524	0.395625	0.128922	523.875	1.71968
21.5719	0.05	530	0.76	526	0.58	513	-0.08	525	-0.29	530	-0.67	525	-0.79	536	0.22	528	0.65	525	0.54	525	1.12	513	1.23	509	1.18	523	0.7	525	0.66	525	1	524	0.42875	0.157937	523.875	1.71968
21.5831	-0.05	530	0.34	526	0.43	513	0.25	525	-0.04	530	-0.59	525	-0.93	536	0.3	528	0.49	525	0.51	525	1.15	512	1.1	509	1.09	522	0.89	525	0.47	525	0.91	524	0.395	0.147699	523.75	1.75
21.5942	0.25	530	0.47	526	0.64	513	0.21	525	-0.31	530	-0.32	525	-0.71	536	0.11	528	0.29	525	-0.06	525	1.04	511	1.26	508	0.93	521	0.86	525	0.58	525	0.36	524	0.35	0.134152	523.562	1.81881
21.6054	0.61	530	1.04	526	0.46	513	0.33	525	-0.19	530	-0.03	525	-0.29	536	0.19	528	0.41	525	0.46	525	1.04	510	1.08	507	1.18	521	0.61	525	0.37	525	0.94	524	0.513125	0.114225	523.438	1.88408
21.6166	0.34	530	0.99	526	0.96	513	-0.42	525	-0.1	530	-0.46	525	-0.5	536	-0.17	528	0.4	525	0.45	525	0.88	509	1.04	506	1.14	521	0.76	525	0.67	525	0.73	524	0.419375	0.143726	523.312	1.95089
21.6277	0.15	530	0.42	526	0.33	513	0.04	525	0.2	530	-0.16	525	-0.52	536	0.07	528	0.22	525	0.58	525	0.95	509	0.95	505	0.97	520	0.91	525	0.49	525	0.6	524	0.3875	0.108141	523.188	1.9942
21.6389	0.5	530	0.89	526	0.62	513	-0.31	525	-0.79	530	0.19	525	-1.06	536	-0.06	528	0.27	525	0.57	525	1.1	509	0.98	505	1	520	0.88	525	0.43	525	0.66	524	0.366875	0.159681	523.188	1.9942
21.65	-0.19	530	0.75	526	0.28	513	0.44	525	0.15	530	-0.35	525	-0.34	536	0.07	528	0.46	525	0.65	525	1.18	509	1.13	505	1.1	520	0.69	525	0.76	525	1.07	524	0.490625	0.129046	523.188	1.9942
21.6612	0.33	530	0.73	526	0.88	513	0.23	525	-0.17	530	-0.74	525	-0.17	536	0.07	528	0.36	525	0.47	525	0.92	508	1.04	505	1.2	520	1.07	525	0.47	525	0.89	524	0.47375	0.134858	523.125	2.02459
21.6724	0.1	530	0.31	526	1.06	513	-0.01	525	0.44	530	0	525	-1.04	536	0.1	528	0.36	525	0.25	525	0.95	508	1.33	504	0.97	519	0.9	525	0.6	525	0.67	524	0.436875	0.142661	523	2.06962
21.6835	0.41	530	0.93	526	0.88	513	-0.07	525	-0.13	530	-0.37	525	-0.71	536	0.11	528	0.11	525	0.5	525	1.08	508	1.31	503	0.93	519	0.7	525	0.49	525	1.08	524	0.453125	0.145819	522.938	2.10845
21.6947	0.46	530	0.31	526	0.51	513	0.24	525	0.03	530	-0.24	525	0.25	536	0.25	528	0.36	525	0.36	525	0.97	508	1.06	502	0.78	519	0.86	525	0.62	525	0.47	524	0.455625	0.0857417	522.875	2.1484
21.7058	0.01	530	0.15	526	0.96	513	-0.29	525	0.28	530	-0.11	525	-0.57	536	0.1	528	0.43	525	0.43	525	0.74	508	1.29	501	0.72	519	0.88	525	0.5	525	0.94	524	0.40375	0.126711	522.812	2.1894
21.717	0.6	530	0.1	526	0.69	513	-0.04	525	0.27	530	0.03	525	-0.51	536	0.22	528	0.49	525	0.33	525	0.97	508	0.92	500	0.88	519	0.96	525	0.34	525	0.71	524	0.435	0.105167	522.75	2.2314
21.7282	-0.15	530	0.58	526	0.9	513	-0.31	525	0.38	530	-0.12	525	-1.12	536	0.13	528	0.34	525	0.49	525	0.81	508	1.19	500	0.76	519	0.88	525	0.49	525	0.62	524	0.366875	0.143555	522.75	2.2314
21.7393	0.29	530	0.53	526	1.13	513	0.22	525	-0.34	530	-0.15	525	-0.65	536	0.31	528	0.56	525	0.43	525	1.05	508	1.13	500	0.9	519	0.47	525	0.93	525	0.71	524	0.47	0.13055	522.75	2.2314
21.7505	0.36	530	0.68	526	0.47	513	0.5	525	-0.05	530	-0.23	525	-0.38	536	0.17	528	0.55	525	0.43	525	0.97	508	1.28	499	0.85	519	0.63	525	0.41	525	0.63	524	0.454375	0.106837	522.688	2.27435
21.7616	-0.19	530	1.27	526	1.07	513	-0.32	525	-0.45	530	-0.11	525	-0.89	536	0.23	528	0.46	525	0.7	525	0.91	508	1.12	498	0.94	519	0.94	525	0.92	525	0.92	524	0.47	0.166653	522.625	2.31818
21.7728	0.71	530	0.54	526	1.12	513	0.25	525	0.23	530	-0.51	525	-0.51	536	0.09	528	0.08	525	0.44	525	0.77	508	1.09	497	1.3	519	0.71	525	0.71	525	0.74	524	0.485	0.131609	522.562	2.36285
21.784	0.08	530	1.01	526	0.86	512	0.14	525	-0.69	530	-0.33	525	-0.67	536	0.33	528	0.36	525	0.45	525	1.07	508	1.11	496	1.09	519	0.92	525	0.66	525	1.07	524	0.46625	0.155113	522.438	2.4255
21.7951	0.28	530	0.86	526	0.76	512	0.35	525	0.24	530	-0.18	525	-0.27	536	0.06	528	0.18	525	0.22	525	1.14	508	1.35	495	0.93	518	0.89	525	0.78	525	1	524	0.536875	0.121469	522.312	2.47777
21.8063	-0.21	530	0.5	526	1.25	512	0.51	525	0.06	530	-0.4	525	0.02	536	-0.09	528	0.55	525	0.1	525	1.11	507	1.04	494	1.27	518	0.74	525	0.43	525	0.75	524	0.476875	0.132041	522.188	2.54823
21.8174	0.32	530	0.95	526	0.79	512	0.22	525	-0.02	530	-1.14	525	-1	536	0.42	528	0.33	525	-0.14	525	0.94	506	1.32	493	0.66	518	0.75	525	0.57	525	1.3	524	0.391875	0.176355	522.062	2.61959
21.8286	0.41	530	0.79	526	0.25	512	-0.37	525	-0.16	530	0.24	525	-0.66	536	0.29	528	0.31	525	0.05	525	1.01	506	1.21	492	1.12	518	0.9	525	0.56	525	1.06	524	0.438125	0.138559	522	2.66615
21.8398	-0.3	530	0.62	526	0.56	512	-0.09	525	-0.23	530	-0.53	525	-0.7	536	0.41	528	0.32	525	0.35	525	1.31	506	1.07	491	1	518	0.96	525	0.76	525	0.96	523	0.404375	0.153818	521.875	2.7109
21.8509	0.13	530	0.92	526	1.09	512	-0.61	525	-0.54	530	0.09	525	-0.93	536	0.21	528	0.26	525	0.16	525	0.86	505	1.55	490	0.93	518	0.82	525	0.85	525	0.86	523	0.415625	0.172034	521.75	2.78313
21.8621	-0.23	530	1	526	0.46	512	-0.59	525	-0.34	530	-0.07	525	-1.25	536	0.24	528	0.21	525	0.29	525	0.97	505	1.2	489	0.84	518	0.89	525	0.81	525	0.99	523	0.33875	0.172725	521.688	2.83096
21.8732	-0.31	530	0.46	526	0.79	512	-0.04	525	-0.12	530	-0.15	525	-0.28	536	0.28	528	0.33	525	0.49	525	1.12	505	1.32	488	0.83	518	0.87	525	0.34	525	0.74	523	0.416875	0.125853	521.625	2.87934
21.8844	0.67	530	1.15	526	1.08	512	0	525	-0.19	530	-0.5	525	-1.07	536	0.16	528	0.33	525	0.3	525	1.16	505	1.47	487	1.22	518	0.99	525	0.54	525	0.67	523	0.49875	0.174747	521.562	2.92827
21.8956	0.12	530	0.5	526	0.51	512	0.3	525	0.03	530	0.3	525	-0.56	536	0.27	528	0.57	525	0.18	525	1.14	504	1.68	486	1.02	518	0.92	525	0.42	525	1.15	523	0.534375	0.135216	521.438	3.00135
21.9067	0.82	530	1.05	526	1.14	512	-0.08	525	0.53	530	-0.41	525	-0.54	536	0.2	528	0.49	525	0.41	525	0.95	503	1.54	485	1.1	517	0.82	525	0.67	525	1.18	523	0.616875	0.146898	521.25	3.08018
21.9179	0.68	530	0.8	526	1.21	512	-0.62	525	-0.21	530	-0.55	525	-0.83	536	0.08	528	0.41	525	0.26	525	0.89	503	1.44	484	1.15	516	0.65	525	0.57	525	0.63	522	0.41	0.169206	521.062	3.13378
21.929	0.66	530	0.83	526	1.01	511	0.3	525	-0.39	530	0.06	525	-0.68	536	0.15	528	0.51	525	0.62	525	1.13	503	1.21	483	1	515	0.75	525	0.38	525	1.13	522	0.541875	0.137635	520.875	3.2027
21.9402	0.29	530	0.28	526	0.88	510	0.02	525	-0.14	530	-0.52	525	-0.62	536	0.15	528	0.32	525	0.07	525	1.41	503	1.37	482	0.77	515	0.75	525	0.75	525	0.59	522	0.398125	0.146294	520.75	3.26535
21.9514	0.62	530	0.83	526	0.49	510	-0.38	525	-0.19	530	-0.21	525	-1.12	536	0.18	528	0.68	525	0.36	525	1.07	502	1.71	481	0.97	515	0.67	525	0.47	525	0.72	522	0.429375	0.166647	520.625	3.33776
21.9625	0.28	530	1.41	526	0.39	510	-0.27	525	-0.21	530	-0.12	525	-0.35	536	0.59	528	0.41	525	-0.02	525	0.97	501	1.48	480	0.93	515	0.81	525	0.42	525	0.88	522	0.475	0.14408	520.5	3.41077
21.9737	0.03	530	0.32	526	1.14	510	-0.13	525	-0.39	530	-0.63	525	-0.59	536	0.11	528	0.52	525	0.29	525	0.94	501	1.6	479	1.02	515	0.78	525	0.53	525	0.81	522	0.396875	0.160633	520.438	3.46045
21.9848	0.53	530	1.78	526	0.64	510	-0.13	525	0.21	530	-0.25	525	-0.47	536	0.09	528	0.35	525	0.3	525	1.17	501	1.65	478	0.68	515	0.92	525	0.68	525	0.97	522	0.57	0.158496	520.375	3.51055
21.996	0.1	530	0.76	526	0.76	510	0.11	525	-0.33	530	-0.83	525	-0.08	536	0.09	528	0.54	525	0.17	525	0.69	501	1.77	477	0.99	515	0.7	525	0.62	525	0.92	522	0.43625	0.152411	520.312	3.56104
22.0072	0.3	530	0.62	526	0.72	510	0.94	525	0.39	530	-0.55	525	-1.05	536	0.27	528	0.51	525	0.12	525	1.11	501	1.86	476	0.69	515	1	525	0.89	525	0.8	522	0.53875	0.167541	520.25	3.6119
22.0183	0.23	530	0.52	526	0.24	510	0.17	525	0.51	530	-0.01	525	-0.58	536	0.11	528	0.15	525	0.23	525	1.19	501	1.63	475	1.24	515	0.82	525	0.37	525	0.85	522	0.479375	0.137833	520.188	3.66313
22.0295	-0.05	530	0.21	526	1	510	0.47	525	0.3	530	-0.73	525	-0.8	536	0.47	528	0.36	525	0.32	525	1	500	1.62	474	0.96	515	0.78	525	0.39	525	0.99	522	0.455625	0.157432	520.062	3.73661
22.0406	-0.29	530	0.8	526	0.86	510	-0.58	525	0.25	530	-0.38	525	-0.54	536	0.46	528	0.6	525	0.36	525	1.14	499	1.66	473	1.04	515	0.88	525	0.62	525	1.13	522	0.500625	0.165357	519.938	3.81059
22.0518	0.19	530	0.88	526	0.57	510	0.38	525	0.37	530	-0.52	525	-0.7	536	0.29	528	0.22	525	0.15	525	1.3	498	1.8	472	0.97	515	1.04	525	0.41	525	1.07	522	0.52625	0.160294	519.812	3.88503
22.063	-0.22	530	0.66	526	0.58	510	-0.13	525	-0.1	530	-0.71	525	-0.43	536	0.11	528	0.44	525	0.12	525	0.95	497	1.8	471	1	515	1.03	525	0.72	525	1.16	521	0.43625	0.168062	519.625	3.95798
22.0741	-0.23	530	1.11	526	0.07	510	0.41	525	-0.21	530	-0.47	525	-0.78	536	0.21	528	0.14	525	0.22	525	1.11	497	1.57	470	1.31	515	0.76	524	0.75	525	1.16	520	0.445625	0.172784	519.438	4.00309
22.0853	0.43	530	0.23	526	0.38	510	-0.08	525	-0.15	530	-0.33	525	-0.1	536	0.16	528	0.38	525	0.18	525	1.08	497	1.72	469	1.38	515	0.79	524	0.52	525	0.92	519	0.469375	0.144012	519.312	4.05454
22.0964	0.43	530	1.3	526	1.02	510	0.16	525	-0.09	530	0.08	525	-0.46	536	0.38	528	0.51	525	0.42	525	0.99	496	1.49	468	1.09	514	0.85	524	0.47	525	0.69	519	0.583125	0.130944	519.125	4.13408
22.1076	0.27	530	0.9	526	0.33	510	0.35	525	0.31	530	-0.18	525	-0.56	536	-0.11	528	0.46	525	0.14	525	1.21	496	1.75	467	0.98	513	0.87	524	0.44	525	0.69	519	0.490625	0.14233	519	4.19126
22.1187	0.06	530	0.69	526	1	510	0.35	525	-0.44	530	-0.16	525	-1.16	536	0.11	528	0.54	525	0.24	525	1.34	496	1.74	466	1.04	513	0.92	524	0.31	525	0.66	519	0.4525	0.17719	518.938	4.2431
22.1299	0.22	530	0.11	526	0.72	510	-0.42	525	-0.03	530	-0.49	525	-0.77	536	0.24	528	0.24	525	0.03	525	1.07	495	1.41	465	0.79	513	1.04	524	0.36	525	0.9	519	0.33875	0.1534	518.812	4.31781
22.1411	0.24	530	0.34	526	0.72	510	-0.11	525	-0.11	530	0.69	525	-1.03	536	0.21	528	0.46	525	0.11	525	0.95	494	1.24	464	1.03	513	0.96	524	0.47	525	0.69	519	0.42875	0.139925	518.688	4.39291
22.1522	-0.01	530	0.45	526	0.74	510	0.16	525	0.19	530	-0.24	525	-0.16	536	0.07	528	0.66	525	-0.02	525	1.34	494	0.89	463	0.59	513	0.83	524	0.37	525	0.81	519	0.416875	0.111302	518.625	4.44492
22.1634	-0.44	530	1.09	526	0.45	510	-0.12	525	0.1	530	-0.97	525	-0.88	536	0.11	528	0.34	525	0.25	525	1.15	494	0.97	463	1.11	513	0.74	524	0.68	525	0.86	519	0.34	0.169676	518.625	4.44492
22.1745	0.37	530	1.08	526	0.89	510	-0.26	525	-0.2	530	-0.25	525	-0.35	536	0.29	528	0.6	525	0.21	525	1.27	493	1.04	463	0.79	513	0.94	524	0.45	525	0.98	519	0.490625	0.135245	518.562	4.46838
22.1857	0.08	530	0.84	525	0.46	510	0.35	525	0.31	530	-0.54	525	-0.7	536	0.26	528	0.43	525	0.22	525	1.02	492	0.81	463	1.09	513	0.63	524	0.44	525	0.9	519	0.4125	0.12562	518.438	4.48606
22.1969	0.41	530	0.26	525	0.55	510	0.13	525	-0.16	530	-0.69	525	-0.5	536	0.32	528	0.6	525	0.24	525	1.11	491	0.67	463	0.92	513	0.83	524	0.51	525	1.53	519	0.420625	0.141617	518.375	4.51098
22.208	0.07	530	0.53	525	0.47	510	0.3	525	-0.49	530	-0.56	525	-0.47	536	0.44	528	0.56	525	0.13	525	1.45	490	0.96	463	1.18	513	1.06	524	0.46	525	0.98	519	0.441875	0.151154	518.312	4.53663
22.2192	0.39	530	0.7	525	0.9	510	0.13	525	-0.8	530	-0.18	525	-1.57	536	0.29	528	0.23	525	0.3	525	1.36	489	0.55	463	1.12	513	0.61	524	0.61	525	1.38	519	0.37625	0.189554	518.25	4.56299
22.2303	0.51	530	0.49	525	0.03	510	0.61	525	0.26	530	-0.87	525	-0.51	536	0.29	528	0.43	525	0.19	525	1.17	488	0.37	463	1.1	512	0.96	524	0.77	525	0.64	519	0.4025	0.13402	518.125	4.59517
22.2415	0.04	530	0.31	525	0.43	510	0.1	525	-0.32	530	-0.83	525	-1.23	536	0.26	528	0.46	525	0.44	525	1.46	487	0.63	463	1.02	511	0.91	524	0.49	525	1.07	519	0.3275	0.172428	518	4.62871
22.2527	0.14	530	0.3	525	1.05	510	0.79	525	0.52	530	-0.01	525	-0.8	536	0.24	528	0.29	525	0.39	525	1.33	486	0.65	463	1.29	510	0.93	524	0.85	525	1.13	519	0.568125	0.138384	517.875	4.66358
22.2638	0.25	530	0.23	525	0.53	510	0.57	525	0.16	530	-0.16	525	-1.01	536	0.53	528	0.37	525	0.41	525	1.23	485	0.47	463	0.94	509	0.44	524	0.34	525	0.9	518	0.3875	0.124373	517.688	4.69904
22.275	-0.15	530	1.12	525	1.07	510	0.01	525	-0.16	530	-0.63	525	-0.79	536	0.31	528	0.61	525	0.23	525	1.48	484	0.52	463	1.07	509	1.04	524	0.82	525	1.26	518	0.488125	0.172296	517.625	4.72835
22.2861	0.4	530	0.79	525	0.55	510	-0.58	525	0.51	530	-0.72	525	-1.08	536	0.29	528	0.16	525	0.26	525	1.69	483	0.38	463	0.91	509	0.94	524	0.42	525	0.88	518	0.3625	0.172067	517.562	4.7583
22.2973	0.42	530	1.06	525	0.97	510	-0.37	525	0.4	530	0.13	525	-0.77	536	0.15	528	0.46	525	0.23	525	1.73	482	0.45	463	1.2	509	1.19	524	0.4	525	0.93	518	0.53625	0.156923	517.5	4.78888
22.3085	0.6	530	0.99	525	1.08	510	-0.09	525	-0.17	530	0	525	-0.25	536	0.32	528	0.51	525	0.4	525	1.43	481	0.41	463	0.76	509	0.79	524	0.49	525	0.99	518	0.51625	0.120747	517.438	4.82007
[truncated: 1,211 more rows]

## Sheet: ED Figure 10C
0 → -5	-5 → 5
0.4129	0.413
0.1116	0.4799
0.2121	0.4241
0.2902	0.4353
0.3906	0.5691
0.3349	0.5246
0.212	0.5915
0.234	0.3343
0.156	0.3342
0.2228	0.4346
0.2229	0.3677
0.0891	0.1225
0.0891	0.0892
0.1003	0.4791
0.1893	0.4233
0.1009	0.1233

## Sheet: ED Figure 10D
Title: pharynx keys Date: 2020/10/23 13:09
Parameters: Exposure time: 10 ms Binning: 4x4
Bleaching correction function: exp. offset = 2045,69 * exp(-0,0017 * x) + 23387,91 R^2: 0,9224 Video duration: 31,26 s Framerate: 90,53
# Measurement	Time	F	F_bleach_correct	dF/F0	dF/F0_bleach_correct	Wavelength	Holding DF/F0
0	0.011	24055.6	0	?	0	540	0
1	0.0221	24071.3	0	?	0	540	0
2	0.0331	24066.8	0	?	0	540	0
3	0.0442	24179.2	0	?	0	540	0
4	0.0552	24511.1	0	?	0	540	0
5	0.0663	24768.8	0	?	0	540	0
6	0.0773	25069.1	0	?	0	540	0
7	0.0884	25233.8	0	?	0	540	0
8	0.0994	25382.1	0	?	0	540	0
9	0.1105	25391.4	0	?	0	540	0
10	0.1215	25496.8	0	?	0	540	0
11	0.1325	25500	0	?	0	540	0
12	0.1436	25567.8	0	?	0	540	0
13	0.1546	25594.3	0	?	0	540	0
14	0.1657	25544.2	0	?	0	540	0
15	0.1767	25571.8	0	?	0	540	0
16	0.1878	25617.8	0	?	0	540	0
17	0.1988	25609.1	0	?	0	540	0
18	0.2099	25607.4	0	?	0	540	0
19	0.2209	25654.1	0	?	0	540	0
20	0.232	25652.6	0	?	0	540	0
21	0.243	25723.8	0	?	0	540	0
22	0.254	25682.4	0	?	0	540	0
23	0.2651	25732.9	0	?	0	540	0
24	0.2761	25717	0	?	0	540	0
25	0.2872	25743	0	?	0	540	0
26	0.2982	25671.3	0	?	0	540	0
27	0.3093	25765.5	0	?	0	540	0
28	0.3203	25678.4	0	?	0	540	0
29	0.3314	25689.4	0	?	0	540	0
30	0.3424	25706.5	0	?	0	540	0
31	0.3535	25667.6	0	?	0	540	0
32	0.3645	25683.6	0	?	0	540	0
33	0.3755	25764.9	0	?	0	540	0
34	0.3866	25737.2	0	?	0	540	0
35	0.3976	25740.6	0	?	0	540	0
36	0.4087	25718.5	0	?	0	540	0
37	0.4197	25661	0	?	0	540	0
38	0.4308	25667.7	0	?	0	540	0
39	0.4418	25695	0	?	0	540	0
40	0.4529	25742.9	0	?	0	540	0
41	0.4639	25654.8	0	?	0	540	0
42	0.475	25710.8	0	?	0	540	0
43	0.486	25679.5	0	?	0	540	0
44	0.4971	25696	0	?	0	540	0
45	0.5081	25689.7	0	?	0	540	0
46	0.5191	25694	0	?	0	540	0
47	0.5302	25724.8	0	?	0	540	0
48	0.5412	25669.3	0	?	0	540	0
49	0.5523	25731.4	0	?	0	540	0
50	0.5633	25719.3	0	?	0	540	0
51	0.5744	25663	0	?	0	540	0
52	0.5854	25630	0	?	0	540	0
53	0.5965	25632.4	0	?	0	540	0
54	0.6075	25696.3	0	?	0	540	0
55	0.6186	25629.4	0	?	0	540	0
56	0.6296	25617.4	0	?	0	540	0
57	0.6406	25579.7	0	?	0	540	0
58	0.6517	25571.9	0	?	0	540	0
59	0.6627	25581.8	0	?	0	540	0
60	0.6738	25585.7	0	?	0	540	0
61	0.6848	25535.9	0	?	0	540	0
62	0.6959	25538.5	0	?	0	540	0
63	0.7069	25553.2	0	?	0	540	0
64	0.718	25470.6	0	?	0	540	0
65	0.729	25547.1	0	?	0	540	0
66	0.7401	25552.2	0	?	0	540	0
67	0.7511	25523.4	0	?	0	540	0
68	0.7621	25508.7	0	?	0	540	0
69	0.7732	25503.2	0	?	0	540	0
70	0.7842	25496	0	?	0	540	0
71	0.7953	25498.6	0	?	0	540	0
72	0.8063	25536.3	0	?	0	540	0
73	0.8174	25468	0	?	0	540	0
74	0.8284	25481.7	0	?	0	540	0
75	0.8395	25482.5	0	?	0	540	0
76	0.8505	25482.2	0	?	0	540	0
77	0.8616	25445.7	0	?	0	540	0
78	0.8726	25442.7	0	?	0	540	0
79	0.8836	25489.7	0	?	0	540	0
80	0.8947	25447.5	0	?	0	540	0
81	0.9057	25389.9	0	?	0	540	0
82	0.9168	25382.8	0	?	0	540	0
83	0.9278	25419	0	?	0	540	0
84	0.9389	25398.4	0	?	0	540	0
85	0.9499	25379.5	0	?	0	540	0
86	0.961	25359.4	0	?	0	540	0
87	0.972	25424.3	0	?	0	540	0
88	0.9831	25335.5	0	?	0	540	0
89	0.9941	25342.2	0	?	0	540	0
90	1.0051	25320.7	0	?	0	540	0
91	1.0162	25365.3	0	?	0	540	0
92	1.0272	25315.4	0	?	0	540	0
93	1.0383	25342.5	0	?	0	540	0
94	1.0493	25289.3	0	?	0	540	0
95	1.0604	25352.1	0	?	0	540	0
96	1.0714	25331.5	0	?	0	540	0
97	1.0825	25328.8	0	?	0	540	0
98	1.0935	25296	0	?	0	540	0
99	1.1046	25328.8	0	?	0	540	0
100	1.1156	25259.7	0	?	0	540	0
101	1.1266	25241.4	0	?	0	540	0
102	1.1377	25243.2	0	?	0	540	0
103	1.1487	25214.2	0	?	0	540	0
104	1.1598	25226.6	0	?	0	540	0
105	1.1708	25265	0	?	0	540	0
106	1.1819	25177.7	0	?	0	540	0
107	1.1929	25188.1	0	?	0	540	0
108	1.204	25164.8	0	?	0	540	0
109	1.215	25212.8	0	?	0	540	0
110	1.2261	25228.5	0	?	0	540	0
111	1.2371	25231.5	0	?	0	540	0
112	1.2482	25202.8	0	?	0	540	0
113	1.2592	25193.6	0	?	0	540	0
114	1.2702	25204.9	0	?	0	540	0
115	1.2813	25170.5	0	?	0	540	0
116	1.2923	25191.7	0	?	0	540	0
117	1.3034	25168.3	0	?	0	540	0
118	1.3144	25177.9	0	?	0	540	0
119	1.3255	25210.6	0	?	0	540	0
120	1.3365	25155.4	0	?	0	540	0
121	1.3476	25131.1	0	?	0	540	0
122	1.3586	25111.9	0	?	0	540	0
123	1.3697	25164.1	0	?	0	540	0
124	1.3807	25079.2	0	?	0	540	0
125	1.3917	25133.1	0	?	0	540	0
126	1.4028	25105.8	0	?	0	540	0
127	1.4138	25121.4	0	?	0	540	0
128	1.4249	25099.9	0	?	0	540	0
129	1.4359	25091.4	0	?	0	540	0
130	1.447	25093.7	0	?	0	540	0
131	1.458	25149.8	0	?	0	540	0
132	1.4691	25050.9	0	?	0	540	0
133	1.4801	25086.4	0	?	0	540	0
134	1.4912	25072.7	0	?	0	540	0
135	1.5022	25073.3	0	?	0	540	0
136	1.5132	25094.7	0	?	0	540	0
137	1.5243	25043.8	0	?	0	540	0
138	1.5353	25035	0	?	0	540	0
139	1.5464	25021.8	0	?	0	540	0
140	1.5574	25053.2	0	?	0	540	0
141	1.5685	24993.4	0	?	0	540	0
142	1.5795	25002.3	0	?	0	540	0
143	1.5906	25002	0	?	0	540	0
144	1.6016	25021	0	?	0	540	0
145	1.6127	25008.5	0	?	0	540	0
146	1.6237	25033.8	0	?	0	540	0
147	1.6347	25003.8	0	?	0	540	0
148	1.6458	25022.9	0	?	0	540	0
149	1.6568	24994.5	0	?	0	540	0
150	1.6679	24997.3	0	?	0	540	0
151	1.6789	24977.7	0	?	0	540	0
152	1.69	25013.4	0	?	0	540	0
153	1.701	25008	0	?	0	540	0
154	1.7121	24946	0	?	0	540	0
155	1.7231	25000	0	?	0	540	0
156	1.7342	25021.4	0	?	0	540	0
157	1.7452	24960.7	0	?	0	540	0
158	1.7562	24910.4	0	?	0	540	0
159	1.7673	24961.4	0	?	0	540	0
160	1.7783	24938.2	0	?	0	540	0
161	1.7894	24941.3	0	?	0	540	0
162	1.8004	24885.8	0	?	0	540	0
163	1.8115	24922.6	0	?	0	540	0
164	1.8225	24925.7	0	?	0	540	0
165	1.8336	24930.2	0	?	0	540	0
166	1.8446	24938.6	0	?	0	540	0
167	1.8557	24927.6	0	?	0	540	0
168	1.8667	24895.1	0	?	0	540	0
169	1.8777	24846.2	0	?	0	540	0
170	1.8888	24892.8	0	?	0	540	0
171	1.8998	24893.1	0	?	0	540	0
172	1.9109	24872.6	0	?	0	540	0
173	1.9219	24838.9	0	?	0	540	0
174	1.933	24859.2	0	?	0	540	0
175	1.944	24822.5	0	?	0	540	0
176	1.9551	24826.5	0	?	0	540	0
177	1.9661	24808.2	0	?	0	540	0
178	1.9772	24871.7	0	?	0	540	0
179	1.9882	24883.7	0	?	0	540	0
180	1.9993	24815	0	?	0	540	0
181	2.0103	24812.4	0	?	0	540	0
182	2.0213	24816.1	0	?	0	540	0
183	2.0324	24787.9	0	?	0	540	0
184	2.0434	24826.7	0	?	0	540	0
185	2.0545	24816.1	0	?	0	540	0
186	2.0655	24855.8	0	?	0	540	0
187	2.0766	24807.1	0	?	0	540	0
188	2.0876	24772.8	0	?	0	540	0
189	2.0987	24754.3	0	?	0	540	0
190	2.1097	24767.8	0	?	0	540	0
191	2.1208	24808.2	0	?	0	540	0
192	2.1318	24812.3	0	?	0	540	0
193	2.1428	24763	0	?	0	540	0
194	2.1539	24769.4	0	?	0	540	0
195	2.1649	24820	0	?	0	540	0
196	2.176	24782.9	0	?	0	540	0
197	2.187	24790.6	0	?	0	540	0
198	2.1981	24781.1	0	?	0	540	0
199	2.2091	24754.4	0	?	0	540	0
200	2.2202	24775.4	0	?	0	540	0
201	2.2312	24751.3	0	?	0	540	0
202	2.2423	24747.6	0	?	0	540	0
203	2.2533	24737.2	0	?	0	540	0
204	2.2643	24724	0	?	0	540	0
205	2.2754	24676.5	0	?	0	540	0
206	2.2864	24683.5	0	?	0	540	0
207	2.2975	24719.3	0	?	0	540	0
208	2.3085	24700.2	0	?	0	540	0
209	2.3196	24652.8	0	?	0	540	0
210	2.3306	24623.8	0	?	0	540	0
211	2.3417	24676	0	?	0	540	0
212	2.3527	24696.1	0	?	0	540	0
213	2.3638	24640	0	?	0	540	0
214	2.3748	24731.1	0	?	0	540	0
215	2.3858	24656.9	0	?	0	540	0
216	2.3969	24669.6	0	?	0	540	0
217	2.4079	24719.6	0	?	0	540	0
218	2.419	24645.3	0	?	0	540	0
219	2.43	24654.6	0	?	0	540	0
220	2.4411	24690.8	0	?	0	540	0
221	2.4521	24699.1	0	?	0	540	0
222	2.4632	24626.7	0	?	0	540	0
223	2.4742	24615.1	0	?	0	540	0
224	2.4853	24647.4	0	?	0	540	0
225	2.4963	24601.8	0	?	0	540	0
226	2.5073	24598.8	0	?	0	540	0
227	2.5184	24625.6	0	?	0	540	0
228	2.5294	24600.9	0	?	0	540	0
229	2.5405	24534.5	0	?	0	540	0
230	2.5515	24604.3	0	?	0	540	0
231	2.5626	24566.3	0	?	0	540	0
232	2.5736	24553.3	0	?	0	540	0
233	2.5847	24570.1	0	?	0	540	0
234	2.5957	24571.3	0	?	0	540	0
235	2.6068	24567.8	0	?	0	540	0
236	2.6178	24576.1	0	?	0	540	0
237	2.6288	24548.5	0	?	0	540	0
238	2.6399	24537.8	0	?	0	540	0
239	2.6509	24541.7	0	?	0	540	0
240	2.662	24541.7	0	?	0	540	0
241	2.673	24549.3	0	?	0	540	0
242	2.6841	24565.1	0	?	0	540	0
243	2.6951	24587.3	0	?	0	540	0
244	2.7062	24472.4	0	?	0	540	0
245	2.7172	24519.2	0	?	0	540	0
246	2.7283	24520.4	0	?	0	540	0
247	2.7393	24473.1	0	?	0	540	0
248	2.7504	24498.3	0	?	0	540	0
249	2.7614	24475.7	0	?	0	540	0
250	2.7724	24488.2	0	?	0	540	0
251	2.7835	24490.2	0	?	0	540	0
252	2.7945	24482.4	0	?	0	540	0
253	2.8056	24425.4	0	?	0	540	0
254	2.8166	24455.2	0	?	0	540	0
255	2.8277	24481.7	0	?	0	540	0
256	2.8387	24507.5	0	?	0	540	0
257	2.8498	24545.2	0	?	0	540	0
258	2.8608	24506.9	0	?	0	540	0
259	2.8719	24449.8	0	?	0	540	0
260	2.8829	24513.6	0	?	0	540	0
261	2.8939	24409.9	0	?	0	540	0
262	2.905	24421.1	0	?	0	540	0
263	2.916	24428.3	0	?	0	540	0
264	2.9271	24492.1	0	?	0	540	0
265	2.9381	24471.3	0	?	0	540	0
266	2.9492	24395.3	0	?	0	540	0
267	2.9602	24486.9	0	?	0	540	0
268	2.9713	24437.2	0	?	0	540	0
269	2.9823	24438.9	0	?	0	540	0
270	2.9934	24478.1	0	?	0	540	0
271	3.0044	24478.2	0	?	0	540	0
272	3.0154	24444.1	0	?	0	540	0
273	3.0265	24464.5	0	?	0	540	0
274	3.0375	24436.9	0	?	0	540	0
275	3.0486	24439.5	0	?	0	540	0
276	3.0596	24469.3	0	?	0	540	0
277	3.0707	24426.1	0	?	0	540	0
278	3.0817	24404.5	0	?	0	540	0
279	3.0928	24452	0	?	0	540	0
280	3.1038	24415.3	0	?	0	540	0
281	3.1149	24473.1	0	?	0	540	0
282	3.1259	24376.9	0	?	0	540	0
283	3.1369	24453.8	0	?	0	540	0
284	3.148	24382	0	?	0	540	0
285	3.159	24388.8	0	?	0	540	0
286	3.1701	24401.5	0	?	0	540	0
287	3.1811	24408.7	0	?	0	540	0
288	3.1922	24409.1	0	?	0	540	0
289	3.2032	24404.8	0	?	0	540	0
290	3.2143	24371.6	0	?	0	540	0
291	3.2253	24388.6	0	?	0	540	0
292	3.2364	24308.1	0	?	0	540	0
293	3.2474	24360.1	0	?	0	540	0
294	3.2584	24380.8	0	?	0	540	0
295	3.2695	24395.5	0	?	0	540	0
296	3.2805	24410.9	0	?	0	540	0
297	3.2916	24333.8	0	?	0	540	0
298	3.3026	24372.1	0	?	0	540	0
299	3.3137	24362.2	0	?	0	540	0
300	3.3247	24308.4	0	?	0	540	0
301	3.3358	24345.4	0	?	0	540	0
302	3.3468	24286.2	0	?	0	540	0
303	3.3579	24364.9	0	?	0	540	0
304	3.3689	24335.2	0	?	0	540	0
305	3.3799	24348.2	0	?	0	540	0
306	3.391	24316.3	0	?	0	540	0
307	3.402	24277.7	0	?	0	540	0
308	3.4131	24310.2	0	?	0	540	0
309	3.4241	24318.4	0	?	0	540	0
310	3.4352	24333.1	0	?	0	540	0
311	3.4462	24318.8	0	?	0	540	0
312	3.4573	24333.3	0	?	0	540	0
313	3.4683	24275.4	0	?	0	540	0
314	3.4794	24312.2	0	?	0	540	0
315	3.4904	24302.8	0	?	0	540	0
316	3.5014	24246.2	0	?	0	540	0
317	3.5125	24258.6	0	?	0	540	0
318	3.5235	24231	0	?	0	540	0
319	3.5346	24262.2	0	?	0	540	0
320	3.5456	24221.2	0	?	0	540	0
321	3.5567	24272.1	0	?	0	540	0
322	3.5677	24245.8	0	?	0	540	0
323	3.5788	24246.2	0	?	0	540	0
324	3.5898	24241.6	0	?	0	540	0
325	3.6009	24232.8	0	?	0	540	0
326	3.6119	24257.8	0	?	0	540	0
327	3.623	24263.7	0	?	0	540	0
328	3.634	24197.3	0	?	0	540	0
329	3.645	24256.3	0	?	0	540	0
330	3.6561	24251.6	0	?	0	540	0
331	3.6671	24211.3	0	?	0	540	0
332	3.6782	24196.1	0	?	0	540	0
333	3.6892	24212.2	0	?	0	540	0
334	3.7003	24256	0	?	0	540	0
335	3.7113	24205.5	0	?	0	540	0
336	3.7224	24172	0	?	0	540	0
337	3.7334	24210.6	0	?	0	540	0
338	3.7445	24204.7	0	?	0	540	0
339	3.7555	24254.2	0	?	0	540	0
340	3.7665	24210.8	0	?	0	540	0
341	3.7776	24265.9	0	?	0	540	0
342	3.7886	24260.6	0	?	0	540	0
343	3.7997	24145.6	0	?	0	540	0
344	3.8107	24271.4	0	?	0	540	0
345	3.8218	24244.4	0	?	0	540	0
346	3.8328	24187.1	0	?	0	540	0
347	3.8439	24237.3	0	?	0	540	0
348	3.8549	24199.8	0	?	0	540	0
349	3.866	24200.9	0	?	0	540	0
350	3.877	24242.4	0	?	0	540	0
351	3.888	24238.4	0	?	0	540	0
352	3.8991	24174.5	0	?	0	540	0
353	3.9101	24165.8	0	?	0	540	0
354	3.9212	24202.2	0	?	0	540	0
355	3.9322	24159.9	0	?	0	540	0
356	3.9433	24190	0	?	0	540	0
357	3.9543	24189	0	?	0	540	0
358	3.9654	24172.5	0	?	0	540	0
359	3.9764	24149.4	0	?	0	540	0
360	3.9875	24182.8	0	?	0	540	0
361	3.9985	24157	0	?	0	540	0
362	4.0095	24174.3	0	?	0	540	0
363	4.0206	24140.6	0	?	0	540	0
364	4.0316	24181.3	0	?	0	540	0
365	4.0427	24187.2	0	?	0	540	0
366	4.0537	24157.3	0	?	0	540	0
367	4.0648	24215.4	0	?	0	540	0
368	4.0758	24137.4	0	?	0	540	0
369	4.0869	24186.2	0	?	0	540	0
370	4.0979	24179.5	0	?	0	540	0
371	4.109	24248.8	0	?	0	540	0
372	4.12	24219	0	?	0	540	0
373	4.131	24222	0	?	0	540	0
374	4.1421	24161.2	0	?	0	540	0
375	4.1531	24177.5	0	?	0	540	0
376	4.1642	24196.5	0	?	0	540	0
377	4.1752	24238.4	0	?	0	540	0
378	4.1863	24210.5	0	?	0	540	0
379	4.1973	24157.5	0	?	0	540	0
380	4.2084	24164.5	0	?	0	540	0
381	4.2194	24190	0	?	0	540	0
382	4.2305	24177.9	0	?	0	540	0
383	4.2415	24219.4	0	?	0	540	0
384	4.2525	24194.1	0	?	0	540	0
385	4.2636	24203.2	0	?	0	540	0
386	4.2746	24171.2	0	?	0	540	0
387	4.2857	24137	0	?	0	540	0
388	4.2967	24162.9	0	?	0	540	0
389	4.3078	24192.1	0	?	0	540	0
390	4.3188	24212.3	0	?	0	540	0
391	4.3299	24181.8	0	?	0	540	0
392	4.3409	24183.7	0	?	0	540	0
393	4.352	24178.5	0	?	0	540	0
394	4.363	24211.9	0	?	0	540	0
395	4.3741	24227.1	0	?	0	540	0
396	4.3851	24237.5	0	?	0	540	0
397	4.3961	24211	0	?	0	540	0
398	4.4072	24184.2	0	?	0	540	0
399	4.4182	24188.1	0	?	0	540	0
400	4.4293	24186.1	0	?	0	540	0
401	4.4403	24195.1	0	?	0	540	0
402	4.4514	24161.7	0	?	0	540	0
403	4.4624	24190.1	0	?	0	540	0
404	4.4735	24227.3	0	?	0	540	0
405	4.4845	24212.6	0	?	0	540	0
406	4.4956	24198.2	0	?	0	540	0
407	4.5066	24173.8	0	?	0	540	0
408	4.5176	24088.7	0	?	0	540	0
409	4.5287	24174	0	?	0	540	0
410	4.5397	24139.6	0	?	0	540	0
411	4.5508	24079.8	0	?	0	540	0
412	4.5618	24106.5	0	?	0	540	0
413	4.5729	24079.5	0	?	0	540	0
414	4.5839	24175.5	0	?	0	540	0
415	4.595	24180.7	0	?	0	540	0
416	4.606	24153.3	0	?	0	540	0
417	4.6171	24111.1	0	?	0	540	0
418	4.6281	24071.7	0	?	0	540	0
419	4.6391	24113.2	0	?	0	540	0
420	4.6502	24103.7	0	?	0	540	0
421	4.6612	24149.6	0	?	0	540	0
422	4.6723	24016.3	0	?	0	540	0
423	4.6833	24052.5	0	?	0	540	0
424	4.6944	24119.4	0	?	0	540	0
425	4.7054	24078.9	0	?	0	540	0
426	4.7165	24120.5	0	?	0	540	0
427	4.7275	24114.9	0	?	0	540	0
428	4.7386	24080.1	0	?	0	540	0
429	4.7496	24143.9	0	?	0	540	0
430	4.7606	24062	0	?	0	540	0
431	4.7717	24042.6	0	?	0	540	0
432	4.7827	24095.8	0	?	0	540	0
433	4.7938	24090.6	0	?	0	540	0
434	4.8048	24132.9	0	?	0	540	0
435	4.8159	24136.6	0	?	0	540	0
436	4.8269	24151.7	0	?	0	540	0
437	4.838	24075.6	0	?	0	540	0
438	4.849	24116.3	0	?	0	540	0
439	4.8601	24083.4	0	?	0	540	0
440	4.8711	24113.5	0	?	0	540	0
441	4.8821	24064.2	0	?	0	540	0
442	4.8932	24104.8	0	?	0	540	0
443	4.9042	24086.1	0	?	0	540	0
444	4.9153	24110.2	0	?	0	540	0
445	4.9263	24160.9	0	?	0	540	0
446	4.9374	24103.1	0	?	0	540	0
447	4.9484	24177.9	0	?	0	540	0
448	4.9595	24135.8	0	?	0	540	0
449	4.9705	24161.4	0	?	0	540	0
450	4.9816	24261.2	0	?	0	540	0
451	4.9926	24196.2	0	?	0	540	0
452	5.0036	24201.3	0	?	0	540	0
453	5.0147	24186	0	?	0	540	0
454	5.0257	24179.2	0	?	0	540	0
455	5.0368	24252.9	0	?	0	540	0
456	5.0478	24289.9	0	?	0	540	0
457	5.0589	24274.3	0	?	0	540	0
458	5.0699	24304.3	0	?	0	540	0
459	5.081	24289.2	0	?	0	540	0
460	5.092	24327.5	0	?	0	540	0
461	5.1031	24264.2	0	?	0	540	0
462	5.1141	24329.6	0	?	0	540	0
463	5.1252	24343.8	0	?	0	540	0
464	5.1362	24316.6	0	?	0	540	0
465	5.1472	24364.7	0	?	0	540	0
466	5.1583	24357.4	0	?	0	540	0
467	5.1693	24341.2	0	?	0	540	0
468	5.1804	24361.6	0	?	0	540	0
469	5.1914	24356.1	0	?	0	540	0
470	5.2025	24318.5	0	?	0	540	0
471	5.2135	24358.1	0	?	0	540	0
472	5.2246	24339.4	0	?	0	540	0
473	5.2356	24360.5	0	?	0	540	0
474	5.2467	24341.6	0	?	0	540	0
475	5.2577	24319.4	0	?	0	540	0
476	5.2687	24316.8	0	?	0	540	0
477	5.2798	24314.2	0	?	0	540	0
478	5.2908	24293.9	0	?	0	540	0
479	5.3019	24363	0	?	0	540	0
480	5.3129	24315.7	0	?	0	540	0
481	5.324	24319	0	?	0	540	0
482	5.335	24325.6	0	?	0	540	0
483	5.3461	24368	0	?	0	540	0
484	5.3571	24305.6	0	?	0	540	0
485	5.3682	24234.1	0	?	0	540	0
486	5.3792	24332.4	0	?	0	540	0
487	5.3902	24293.9	0	?	0	540	0
488	5.4013	24346.3	0	?	0	540	0
489	5.4123	24323.4	0	?	0	540	0
490	5.4234	24293.1	0	?	0	540	0
491	5.4344	24375.5	0	?	0	540	0
492	5.4455	24376.5	0	?	0	540	0
493	5.4565	24323.1	0	?	0	540	0
494	5.4676	24321.1	0	?	0	540	0
495	5.4786	24325.2	0	?	0	540	0
496	5.4897	24326.4	0	?	0	540	0
497	5.5007	24355.8	0	?	0	540	0
498	5.5117	24315.5	0	?	0	540	0
499	5.5228	24401.1	0	?	0	540	0
500	5.5338	24399	0	?	0	540	0
501	5.5449	24377.3	0	?	0	540	0
502	5.5559	24341.3	0	?	0	540	0
503	5.567	24338.2	0	?	0	540	0
504	5.578	24387.1	0	?	0	540	0
505	5.5891	24320.8	0	?	0	540	0
506	5.6001	24338.5	0	?	0	540	0
507	5.6112	24298.4	0	?	0	540	0
508	5.6222	24322.8	0	?	0	540	0
509	5.6332	24349.6	0	?	0	540	0
510	5.6443	24312.4	0	?	0	540	0
511	5.6553	24307.3	0	?	0	540	0
512	5.6664	24364.9	0	?	0	540	0
513	5.6774	24336.3	0	?	0	540	0
514	5.6885	24353.8	0	?	0	540	0
515	5.6995	24292.2	0	?	0	540	0
516	5.7106	24319.5	0	?	0	540	0
517	5.7216	24345.4	0	?	0	540	0
518	5.7327	24358.4	0	?	0	540	0
519	5.7437	24357.1	0	?	0	540	0
520	5.7547	24372.4	0	?	0	540	0
521	5.7658	24388.1	0	?	0	540	0
522	5.7768	24385.6	0	?	0	540	0
523	5.7879	24358.6	0	?	0	540	0
524	5.7989	24374.2	0	?	0	540	0
525	5.81	24351	0	?	0	540	0
526	5.821	24327.9	0	?	0	540	0
527	5.8321	24366	0	?	0	540	0
528	5.8431	24375.3	0	?	0	540	0
529	5.8542	24306	0	?	0	540	0
530	5.8652	24352.7	0	?	0	540	0
531	5.8763	24317.9	0	?	0	540	0
532	5.8873	24347.1	0	?	0	540	0
533	5.8983	24341.1	0	?	0	540	0
534	5.9094	24370.1	0	?	0	540	0
535	5.9204	24332.1	0	?	0	540	0
536	5.9315	24373	0	?	0	540	0
537	5.9425	24302.5	0	?	0	540	0
538	5.9536	24287.6	0	?	0	540	0
539	5.9646	24260.9	0	?	0	540	0
540	5.9757	24328.5	0	?	0	540	0
541	5.9867	24248.8	0	?	0	540	0
542	5.9978	24276.2	0	?	0	540	0
543	6.0088	24290.4	0	?	0	540	0
544	6.0198	24315.5	0	?	0	540	0
545	6.0309	24302.2	0	?	0	540	0
546	6.0419	24289	0	?	0	540	0
547	6.053	24299.9	0	?	0	540	0
548	6.064	24269.9	0	?	0	540	0
549	6.0751	24283.8	0	?	0	540	0
550	6.0861	24287.8	0	?	0	540	0
551	6.0972	24352.3	0	?	0	540	0
552	6.1082	24328.6	0	?	0	540	0
553	6.1193	24304.2	0	?	0	540	0
554	6.1303	24301.1	0	?	0	540	0
555	6.1413	24267.8	0	?	0	540	0
556	6.1524	24292.4	0	?	0	540	0
557	6.1634	24304.1	0	?	0	540	0
558	6.1745	24290.7	0	?	0	540	0
559	6.1855	24258.5	0	?	0	540	0
560	6.1966	24260.1	0	?	0	540	0
561	6.2076	24314.8	0	?	0	540	0
562	6.2187	24303.2	0	?	0	540	0
563	6.2297	24273.6	0	?	0	540	0
564	6.2408	24276.3	0	?	0	540	0
565	6.2518	24272.7	0	?	0	540	0
566	6.2628	24219.1	0	?	0	540	0
567	6.2739	24267.9	0	?	0	540	0
568	6.2849	24261.4	0	?	0	540	0
569	6.296	24263.1	0	?	0	540	0
570	6.307	24323.1	0	?	0	540	0
571	6.3181	24272	0	?	0	540	0
572	6.3291	24247.5	0	?	0	540	0
573	6.3402	24257.5	0	?	0	540	0
574	6.3512	24224.3	0	?	0	540	0
575	6.3623	24261.8	0	?	0	540	0
576	6.3733	24253.1	0	?	0	540	0
577	6.3843	24289.8	0	?	0	540	0
578	6.3954	24283.4	0	?	0	540	0
579	6.4064	24323.3	0	?	0	540	0
580	6.4175	24321.6	0	?	0	540	0
581	6.4285	24277.6	0	?	0	540	0
582	6.4396	24301.1	0	?	0	540	0
583	6.4506	24241	0	?	0	540	0
584	6.4617	24325.5	0	?	0	540	0
585	6.4727	24309.5	0	?	0	540	0
586	6.4838	24268.4	0	?	0	540	0
587	6.4948	24284.7	0	?	0	540	0
588	6.5058	24222.7	0	?	0	540	0
589	6.5169	24205.3	0	?	0	540	0
590	6.5279	24248.2	0	?	0	540	0
591	6.539	24240.8	0	?	0	540	0
592	6.55	24243.8	0	?	0	540	0
593	6.5611	24239.3	0	?	0	540	0
594	6.5721	24276.1	0	?	0	540	0
595	6.5832	24211.9	0	?	0	540	0
596	6.5942	24214.6	0	?	0	540	0
597	6.6053	24210.1	0	?	0	540	0
598	6.6163	24195.8	0	?	0	540	0
599	6.6273	24228.4	0	?	0	540	0
600	6.6384	24227.1	0	?	0	540	0
601	6.6494	24206.6	0	?	0	540	0
602	6.6605	24208.6	0	?	0	540	0
603	6.6715	24196	0	?	0	540	0
604	6.6826	24230.2	0	?	0	540	0
605	6.6936	24276	0	?	0	540	0
606	6.7047	24231.6	0	?	0	540	0
607	6.7157	24226.6	0	?	0	540	0
608	6.7268	24269.4	0	?	0	540	0
609	6.7378	24251.8	0	?	0	540	0
610	6.7489	24235.8	0	?	0	540	0
611	6.7599	24247.1	0	?	0	540	0
612	6.7709	24227.5	0	?	0	540	0
613	6.782	24223.9	0	?	0	540	0
614	6.793	24198.9	0	?	0	540	0
615	6.8041	24173.2	0	?	0	540	0
616	6.8151	24185.5	0	?	0	540	0
617	6.8262	24239.3	0	?	0	540	0
618	6.8372	24173.4	0	?	0	540	0
619	6.8483	24228.4	0	?	0	540	0
620	6.8593	24193.1	0	?	0	540	0
621	6.8704	24196.4	0	?	0	540	0
622	6.8814	24193.7	0	?	0	540	0
623	6.8924	24172.4	0	?	0	540	0
624	6.9035	24179	0	?	0	540	0
625	6.9145	24198.2	0	?	0	540	0
626	6.9256	24200.9	0	?	0	540	0
627	6.9366	24142.3	0	?	0	540	0
628	6.9477	24186.1	0	?	0	540	0
629	6.9587	24202	0	?	0	540	0
630	6.9698	24217.2	0	?	0	540	0
631	6.9808	24214.6	0	?	0	540	0
632	6.9919	24248.2	0	?	0	540	0
633	7.0029	24209.2	0	?	0	540	0
634	7.0139	24239.9	0	?	0	540	0
635	7.025	24210.8	0	?	0	540	0
636	7.036	24225.9	0	?	0	540	0
637	7.0471	24237.6	0	?	0	540	0
638	7.0581	24220.1	0	?	0	540	0
639	7.0692	24221.5	0	?	0	540	0
640	7.0802	24175.3	0	?	0	540	0
641	7.0913	24181.7	0	?	0	540	0
642	7.1023	24180.2	0	?	0	540	0
643	7.1134	24215.3	0	?	0	540	0
644	7.1244	24200.2	0	?	0	540	0
645	7.1354	24205.4	0	?	0	540	0
646	7.1465	24195.7	0	?	0	540	0
647	7.1575	24183.5	0	?	0	540	0
648	7.1686	24135	0	?	0	540	0
649	7.1796	24197.5	0	?	0	540	0
650	7.1907	24183.3	0	?	0	540	0
651	7.2017	24164.3	0	?	0	540	0
652	7.2128	24146.8	0	?	0	540	0
653	7.2238	24168.2	0	?	0	540	0
654	7.2349	24171.7	0	?	0	540	0
655	7.2459	24122.9	0	?	0	540	0
656	7.2569	24175.4	0	?	0	540	0
657	7.268	24174.7	0	?	0	540	0
658	7.279	24171.6	0	?	0	540	0
659	7.2901	24196	0	?	0	540	0
660	7.3011	24117.7	0	?	0	540	0
661	7.3122	24126.9	0	?	0	540	0
662	7.3232	24118	0	?	0	540	0
663	7.3343	24184.4	0	?	0	540	0
664	7.3453	24110.3	0	?	0	540	0
665	7.3564	24160	0	?	0	540	0
666	7.3674	24122.7	0	?	0	540	0
667	7.3784	24124.7	0	?	0	540	0
668	7.3895	24143.4	0	?	0	540	0
669	7.4005	24161.1	0	?	0	540	0
670	7.4116	24158.1	0	?	0	540	0
671	7.4226	24176.7	0	?	0	540	0
672	7.4337	24133.8	0	?	0	540	0
673	7.4447	24154.4	0	?	0	540	0
674	7.4558	24153.2	0	?	0	540	0
675	7.4668	24146.6	0	?	0	540	0
676	7.4779	24136.7	0	?	0	540	0
677	7.4889	24139.9	0	?	0	540	0
678	7.5	24138.5	0	?	0	540	0
679	7.511	24107.5	0	?	0	540	0
680	7.522	24128.6	0	?	0	540	0
681	7.5331	24107.3	0	?	0	540	0
682	7.5441	24145.1	0	?	0	540	0
683	7.5552	24141.3	0	?	0	540	0
684	7.5662	24083.2	0	?	0	540	0
685	7.5773	24095.8	0	?	0	540	0
686	7.5883	24091.4	0	?	0	540	0
687	7.5994	24102.3	0	?	0	540	0
688	7.6104	24053	0	?	0	540	0
689	7.6215	24076.1	0	?	0	540	0
690	7.6325	24097.3	0	?	0	540	0
691	7.6435	24089	0	?	0	540	0
692	7.6546	24119.8	0	?	0	540	0
693	7.6656	24102.2	0	?	0	540	0
694	7.6767	24155.1	0	?	0	540	0
695	7.6877	24094	0	?	0	540	0
696	7.6988	24122.4	0	?	0	540	0
697	7.7098	24094.8	0	?	0	540	0
698	7.7209	24054	0	?	0	540	0
699	7.7319	24007.9	0	?	0	540	0
700	7.743	24068.1	0	?	0	540	0
701	7.754	24088.6	0	?	0	540	0
702	7.765	24042.9	0	?	0	540	0
703	7.7761	24022.5	0	?	0	540	0
704	7.7871	24040.4	0	?	0	540	0
705	7.7982	24040.5	0	?	0	540	0
706	7.8092	24027.1	0	?	0	540	0
707	7.8203	23990.5	0	?	0	540	0
708	7.8313	24026.8	0	?	0	540	0
709	7.8424	24027.8	0	?	0	540	0
710	7.8534	24044	0	?	0	540	0
711	7.8645	24061.8	0	?	0	540	0
712	7.8755	24052.5	0	?	0	540	0
713	7.8865	24048.9	0	?	0	540	0
714	7.8976	24066.4	0	?	0	540	0
715	7.9086	24066.8	0	?	0	540	0
716	7.9197	24095.1	0	?	0	540	0
717	7.9307	24059	0	?	0	540	0
718	7.9418	24128	0	?	0	540	0
719	7.9528	24033.1	0	?	0	540	0
720	7.9639	24051.8	0	?	0	540	0
721	7.9749	24062	0	?	0	540	0
722	7.986	24059.8	0	?	0	540	0
723	7.997	24008	0	?	0	540	0
724	8.008	23985.4	0	?	0	540	0
725	8.0191	24015.7	0	?	0	540	0
726	8.0301	24025.7	0	?	0	540	0
727	8.0412	24094.7	0	?	0	540	0
728	8.0522	24038.7	0	?	0	540	0
729	8.0633	24010.3	0	?	0	540	0
730	8.0743	24041.4	0	?	0	540	0
731	8.0854	24008.9	0	?	0	540	0
732	8.0964	24017.1	0	?	0	540	0
733	8.1075	23995.7	0	?	0	540	0
734	8.1185	24074.6	0	?	0	540	0
735	8.1295	24096.8	0	?	0	540	0
736	8.1406	23990.2	0	?	0	540	0
737	8.1516	23998.3	0	?	0	540	0
738	8.1627	24021.4	0	?	0	540	0
739	8.1737	24066.3	0	?	0	540	0
740	8.1848	24027.7	0	?	0	540	0
741	8.1958	24030.3	0	?	0	540	0
742	8.2069	24055	0	?	0	540	0
743	8.2179	23997.7	0	?	0	540	0
744	8.229	24014.9	0	?	0	540	0
745	8.24	23988.4	0	?	0	540	0
746	8.2511	23990.4	0	?	0	540	0
747	8.2621	24000.5	0	?	0	540	0
748	8.2731	23987.3	0	?	0	540	0
749	8.2842	23995.9	0	?	0	540	0
750	8.2952	23981	0	?	0	540	0
751	8.3063	23990.3	0	?	0	540	0
752	8.3173	24033.8	0	?	0	540	0
753	8.3284	23982.5	0	?	0	540	0
754	8.3394	24011	0	?	0	540	0
755	8.3505	23958.4	0	?	0	540	0
756	8.3615	24062	0	?	0	540	0
757	8.3726	23980.4	0	?	0	540	0
758	8.3836	24026.4	0	?	0	540	0
759	8.3946	24019.3	0	?	0	540	0
760	8.4057	23963.2	0	?	0	540	0
761	8.4167	24018.5	0	?	0	540	0
762	8.4278	24025.4	0	?	0	540	0
763	8.4388	23992.4	0	?	0	540	0
764	8.4499	24019.4	0	?	0	540	0
765	8.4609	24070.5	0	?	0	540	0
766	8.472	24023.6	0	?	0	540	0
767	8.483	24037.9	0	?	0	540	0
768	8.4941	24042.8	0	?	0	540	0
769	8.5051	23995.7	0	?	0	540	0
770	8.5161	24013.2	0	?	0	540	0
771	8.5272	24010	0	?	0	540	0
772	8.5382	23967.9	0	?	0	540	0
773	8.5493	24004.9	0	?	0	540	0
774	8.5603	24029.4	0	?	0	540	0
775	8.5714	23952.3	0	?	0	540	0
776	8.5824	23980.5	0	?	0	540	0
777	8.5935	23972.4	0	?	0	540	0
778	8.6045	23934.6	0	?	0	540	0
779	8.6156	23985.1	0	?	0	540	0
780	8.6266	23949.9	0	?	0	540	0
781	8.6376	24005.1	0	?	0	540	0
782	8.6487	23970.2	0	?	0	540	0
783	8.6597	23974.1	0	?	0	540	0
784	8.6708	24040.9	0	?	0	540	0
785	8.6818	23984.3	0	?	0	540	0
786	8.6929	23933.6	0	?	0	540	0
787	8.7039	23958.9	0	?	0	540	0
788	8.715	23949.2	0	?	0	540	0
789	8.726	23995.1	0	?	0	540	0
790	8.7371	23971.4	0	?	0	540	0
791	8.7481	23908.9	0	?	0	540	0
792	8.7591	23946.8	0	?	0	540	0
793	8.7702	23913.2	0	?	0	540	0
794	8.7812	23959	0	?	0	540	0
795	8.7923	23922.2	0	?	0	540	0
796	8.8033	23982.7	0	?	0	540	0
797	8.8144	23923.6	0	?	0	540	0
798	8.8254	23962	0	?	0	540	0
799	8.8365	23974.6	0	?	0	540	0
800	8.8475	23984.7	0	?	0	540	0
801	8.8586	23995.5	0	?	0	540	0
802	8.8696	23959.6	0	?	0	540	0
803	8.8806	23972.3	0	?	0	540	0
804	8.8917	23982.5	0	?	0	540	0
805	8.9027	23960.5	0	?	0	540	0
806	8.9138	23941.4	0	?	0	540	0
807	8.9248	23984.5	0	?	0	540	0
808	8.9359	23933.5	0	?	0	540	0
809	8.9469	23981.3	0	?	0	540	0
810	8.958	23951.6	0	?	0	540	0
811	8.969	23962.4	0	?	0	540	0
812	8.9801	23983.8	0	?	0	540	0
813	8.9911	23955.7	0	?	0	540	0
814	9.0022	24006.3	0	?	0	540	0
815	9.0132	23991.8	0	?	0	540	0
816	9.0242	23956.9	0	?	0	540	0
817	9.0353	23995.3	0	?	0	540	0
818	9.0463	23984	0	?	0	540	0
819	9.0574	23941.3	0	?	0	540	0
820	9.0684	23931.8	0	?	0	540	0
821	9.0795	23969.2	0	?	0	540	0
822	9.0905	23936.9	0	?	0	540	0
823	9.1016	23975.4	0	?	0	540	0
824	9.1126	23998.5	0	?	0	540	0
825	9.1237	23962.7	0	?	0	540	0
826	9.1347	23979.2	0	?	0	540	0
827	9.1457	23953.2	0	?	0	540	0
828	9.1568	23933	0	?	0	540	0
829	9.1678	23954.6	0	?	0	540	0
830	9.1789	23984.9	0	?	0	540	0
831	9.1899	23931.5	0	?	0	540	0
832	9.201	23919.5	0	?	0	540	0
833	9.212	23977.5	0	?	0	540	0
834	9.2231	23948.1	0	?	0	540	0
835	9.2341	23918.9	0	?	0	540	0
836	9.2452	23968.3	0	?	0	540	0
837	9.2562	23993.4	0	?	0	540	0
838	9.2672	23929	0	?	0	540	0
839	9.2783	23960.9	0	?	0	540	0
840	9.2893	23951.9	0	?	0	540	0
841	9.3004	23945.3	0	?	0	540	0
842	9.3114	23969	0	?	0	540	0
843	9.3225	23936.8	0	?	0	540	0
844	9.3335	23964.8	0	?	0	540	0
845	9.3446	23949.1	0	?	0	540	0
846	9.3556	23925.3	0	?	0	540	0
847	9.3667	23948.9	0	?	0	540	0
848	9.3777	23950.1	0	?	0	540	0
849	9.3887	23935.8	0	?	0	540	0
850	9.3998	23954.9	0	?	0	540	0
851	9.4108	23928.4	0	?	0	540	0
852	9.4219	23958.2	0	?	0	540	0
853	9.4329	23919.5	0	?	0	540	0
854	9.444	23896.3	0	?	0	540	0
855	9.455	23905.3	0	?	0	540	0
856	9.4661	23913.8	0	?	0	540	0
857	9.4771	23939.1	0	?	0	540	0
858	9.4882	23936.7	0	?	0	540	0
859	9.4992	23917.7	0	?	0	540	0
860	9.5102	23882.9	0	?	0	540	0
861	9.5213	23890.6	0	?	0	540	0
862	9.5323	23954	0	?	0	540	0
863	9.5434	23911.3	0	?	0	540	0
864	9.5544	23929.4	0	?	0	540	0
865	9.5655	23911.6	0	?	0	540	0
866	9.5765	23914.5	0	?	0	540	0
867	9.5876	23947.8	0	?	0	540	0
868	9.5986	23879.4	0	?	0	540	0
869	9.6097	23907.5	0	?	0	540	0
870	9.6207	23937.5	0	?	0	540	0
871	9.6317	23919.8	0	?	0	540	0
872	9.6428	23892.4	0	?	0	540	0
873	9.6538	23964.9	0	?	0	540	0
874	9.6649	23892	0	?	0	540	0
875	9.6759	23930.3	0	?	0	540	0
876	9.687	23966.6	0	?	0	540	0
877	9.698	23916.9	0	?	0	540	0
878	9.7091	23900.5	0	?	0	540	0
879	9.7201	23960	0	?	0	540	0
880	9.7312	23938.5	0	?	0	540	0
881	9.7422	23906.4	0	?	0	540	0
882	9.7532	23882.9	0	?	0	540	0
883	9.7643	23900.6	0	?	0	540	0
884	9.7753	23888.1	0	?	0	540	0
885	9.7864	23882.6	0	?	0	540	0
886	9.7974	23945.3	0	?	0	540	0
887	9.8085	23899.2	0	?	0	540	0
888	9.8195	23896.5	0	?	0	540	0
889	9.8306	23907.6	0	?	0	540	0
890	9.8416	23871.3	0	?	0	540	0
891	9.8527	23897.6	0	?	0	540	0
892	9.8637	23876.4	0	?	0	540	0
893	9.8748	23942.5	0	?	0	540	0
894	9.8858	23911.9	0	?	0	540	0
895	9.8968	23878.9	0	?	0	540	0
896	9.9079	23899.1	0	?	0	540	0
897	9.9189	23848.9	0	?	0	540	0
898	9.93	23847.2	0	?	0	540	0
899	9.941	23829.4	0	?	0	540	0
900	9.9521	23961.1	0	?	0	540	0
901	9.9631	23900.1	0	?	0	540	0
902	9.9742	23871.1	0	?	0	540	0
903	9.9852	23867.1	0	?	0	540	0
904	9.9963	23875.7	0	?	0	540	0
905	10.0073	23914.1	0	?	0	540	0
906	10.0183	23872.3	0	?	0	540	0
907	10.0294	23915.1	0	?	0	540	0
908	10.0404	23863.1	0	?	0	540	0
909	10.0515	23899.5	0	?	0	540	0
910	10.0625	23934.2	0	?	0	540	0
911	10.0736	23839.3	0	?	0	540	0
912	10.0846	23912.2	0	?	0	540	0
913	10.0957	23889.3	0	?	0	540	0
914	10.1067	23883.4	0	?	0	540	0
915	10.1178	23846.1	0	?	0	540	0
916	10.1288	23882.5	0	?	0	540	0
917	10.1398	23858.4	0	?	0	540	0
918	10.1509	23849	0	?	0	540	0
919	10.1619	23932.3	0	?	0	540	0
920	10.173	23909.9	0	?	0	540	0
921	10.184	23901	0	?	0	540	0
922	10.1951	23871.5	0	?	0	540	0
923	10.2061	23876	0	?	0	540	0
924	10.2172	23907.7	0	?	0	540	0
925	10.2282	23848	0	?	0	540	0
926	10.2393	23882.8	0	?	0	540	0
927	10.2503	23852.4	0	?	0	540	0
928	10.2613	23858.4	0	?	0	540	0
929	10.2724	23881.1	0	?	0	540	0
930	10.2834	23873.3	0	?	0	540	0
931	10.2945	23892.9	0	?	0	540	0
932	10.3055	23919.4	0	?	0	540	0
933	10.3166	23865.5	0	?	0	540	0
934	10.3276	23914.1	0	?	0	540	0
935	10.3387	23927.3	0	?	0	540	0
936	10.3497	23900.5	0	?	0	540	0
937	10.3608	23932.6	0	?	0	540	0
938	10.3718	23926.6	0	?	0	540	0
939	10.3828	23905	0	?	0	540	0
940	10.3939	23879.7	0	?	0	540	0
941	10.4049	23891.6	0	?	0	540	0
942	10.416	23892.2	0	?	0	540	0
943	10.427	23887.3	0	?	0	540	0
944	10.4381	23908.9	0	?	0	540	0
945	10.4491	23878.7	0	?	0	540	0
946	10.4602	23895.7	0	?	0	540	0
947	10.4712	23924.8	0	?	0	540	0
948	10.4823	23871.2	0	?	0	540	0
949	10.4933	23868.3	0	?	0	540	0
950	10.5043	23865.4	0	?	0	540	0
951	10.5154	23866.7	0	?	0	540	0
952	10.5264	23883.5	0	?	0	540	0
953	10.5375	23871.8	0	?	0	540	0
954	10.5485	23879.3	0	?	0	540	0
955	10.5596	23934.4	0	?	0	540	0
956	10.5706	23902.2	0	?	0	540	0
957	10.5817	23901.4	0	?	0	540	0
958	10.5927	23871.9	0	?	0	540	0
959	10.6038	23845	0	?	0	540	0
960	10.6148	23855.7	0	?	0	540	0
961	10.6259	23834.1	0	?	0	540	0
962	10.6369	23893.6	0	?	0	540	0
963	10.6479	23892	0	?	0	540	0
964	10.659	23866.5	0	?	0	540	0
965	10.67	23898.1	0	?	0	540	0
966	10.6811	23874.3	0	?	0	540	0
967	10.6921	23876	0	?	0	540	0
968	10.7032	23834	0	?	0	540	0
969	10.7142	23838.3	0	?	0	540	0
970	10.7253	23884	0	?	0	540	0
971	10.7363	23853.1	0	?	0	540	0
972	10.7474	23872.4	0	?	0	540	0
973	10.7584	23842.7	0	?	0	540	0
974	10.7694	23851.2	0	?	0	540	0
975	10.7805	23835.6	0	?	0	540	0
976	10.7915	23815	0	?	0	540	0
977	10.8026	23878.8	0	?	0	540	0
978	10.8136	23844.8	0	?	0	540	0
979	10.8247	23818.9	0	?	0	540	0
980	10.8357	23887.1	0	?	0	540	0
981	10.8468	23864	0	?	0	540	0
982	10.8578	23866.3	0	?	0	540	0
983	10.8689	23869.3	0	?	0	540	0
984	10.8799	23853.6	0	?	0	540	0
985	10.8909	23831.7	0	?	0	540	0
986	10.902	23837.8	0	?	0	540	0
987	10.913	23853.8	0	?	0	540	0
988	10.9241	23864.9	0	?	0	540	0
989	10.9351	23871.3	0	?	0	540	0
990	10.9462	23877.1	0	?	0	540	0
991	10.9572	23860.8	0	?	0	540	0
992	10.9683	23863.8	0	?	0	540	0
993	10.9793	23884.7	0	?	0	540	0
994	10.9904	23866.6	0	?	0	540	0
995	11.0014	23876.3	0	?	0	540	0
996	11.0124	23903	0	?	0	540	0
997	11.0235	23870.4	0	?	0	540	0
998	11.0345	23861.6	0	?	0	540	0
999	11.0456	23877.2	0	?	0	540	0
1000	11.0566	23827.5	0	?	0	540	0
1001	11.0677	23870.7	0	?	0	540	0
1002	11.0787	23850.8	0	?	0	540	0
1003	11.0898	23900.9	0	?	0	540	0
1004	11.1008	23870.9	0	?	0	540	0
1005	11.1119	23857.3	0	?	0	540	0
1006	11.1229	23867.6	0	?	0	540	0
1007	11.1339	23818.5	0	?	0	540	0
1008	11.145	23853.3	0	?	0	540	0
1009	11.156	23868.3	0	?	0	540	0
1010	11.1671	23834.8	0	?	0	540	0
1011	11.1781	23816.3	0	?	0	540	0
1012	11.1892	23853.3	0	?	0	540	0
1013	11.2002	23869.5	0	?	0	540	0
1014	11.2113	23863.9	0	?	0	540	0
1015	11.2223	23839.8	0	?	0	540	0
1016	11.2334	23907.1	0	?	0	540	0
1017	11.2444	23818	0	?	0	540	0
1018	11.2554	23836	0	?	0	540	0
1019	11.2665	23832.8	0	?	0	540	0
1020	11.2775	23867.3	0	?	0	540	0
1021	11.2886	23825.2	0	?	0	540	0
1022	11.2996	23847.8	0	?	0	540	0
1023	11.3107	23905.7	0	?	0	540	0
1024	11.3217	23808.5	0	?	0	540	0
1025	11.3328	23850.2	0	?	0	540	0
1026	11.3438	23851.5	0	?	0	540	0
1027	11.3549	23873.8	0	?	0	540	0
1028	11.3659	23844.9	0	?	0	540	0
1029	11.377	23801	0	?	0	540	0
1030	11.388	23850.8	0	?	0	540	0
1031	11.399	23767.3	0	?	0	540	0
1032	11.4101	23809.4	0	?	0	540	0
1033	11.4211	23789	0	?	0	540	0
1034	11.4322	23803	0	?	0	540	0
1035	11.4432	23849.7	0	?	0	540	0
1036	11.4543	23852.9	0	?	0	540	0
1037	11.4653	23845.7	0	?	0	540	0
1038	11.4764	23794.3	0	?	0	540	0
1039	11.4874	23842	0	?	0	540	0
1040	11.4985	23783.4	0	?	0	540	0
1041	11.5095	23832.2	0	?	0	540	0
1042	11.5205	23827.3	0	?	0	540	0
1043	11.5316	23854.5	0	?	0	540	0
1044	11.5426	23852.5	0	?	0	540	0
1045	11.5537	23828.5	0	?	0	540	0
1046	11.5647	23835.2	0	?	0	540	0
1047	11.5758	23844.1	0	?	0	540	0
1048	11.5868	23815.1	0	?	0	540	0
1049	11.5979	23850	0	?	0	540	0
1050	11.6089	23827.4	0	?	0	540	0
1051	11.62	23808.3	0	?	0	540	0
1052	11.631	23822.3	0	?	0	540	0
1053	11.642	23813.2	0	?	0	540	0
1054	11.6531	23844	0	?	0	540	0
1055	11.6641	23867.8	0	?	0	540	0
1056	11.6752	23858.8	0	?	0	540	0
1057	11.6862	23834.3	0	?	0	540	0
1058	11.6973	23842.1	0	?	0	540	0
1059	11.7083	23864.2	0	?	0	540	0
1060	11.7194	23865.7	0	?	0	540	0
1061	11.7304	23835.4	0	?	0	540	0
1062	11.7415	23830.1	0	?	0	540	0
1063	11.7525	23790.7	0	?	0	540	0
1064	11.7635	23834.6	0	?	0	540	0
1065	11.7746	23834	0	?	0	540	0
1066	11.7856	23856.2	0	?	0	540	0
1067	11.7967	23808.9	0	?	0	540	0
1068	11.8077	23777.4	0	?	0	540	0
1069	11.8188	23821.3	0	?	0	540	0
1070	11.8298	23797.6	0	?	0	540	0
1071	11.8409	23793.3	0	?	0	540	0
1072	11.8519	23791.3	0	?	0	540	0
1073	11.863	23817.8	0	?	0	540	0
1074	11.874	23782.8	0	?	0	540	0
1075	11.885	23826.5	0	?	0	540	0
1076	11.8961	23804.7	0	?	0	540	0
1077	11.9071	23822.3	0	?	0	540	0
1078	11.9182	23762.8	0	?	0	540	0
1079	11.9292	23761.9	0	?	0	540	0
1080	11.9403	23737.2	0	?	0	540	0
1081	11.9513	23811.6	0	?	0	540	0
1082	11.9624	23763	0	?	0	540	0
1083	11.9734	23821	0	?	0	540	0
1084	11.9845	23792.5	0	?	0	540	0
1085	11.9955	23781.7	0	?	0	540	0
1086	12.0065	23756.1	0	?	0	540	0
1087	12.0176	23768.7	0	?	0	540	0
1088	12.0286	23796.8	0	?	0	540	0
1089	12.0397	23766.3	0	?	0	540	0
1090	12.0507	23773.8	0	?	0	540	0
1091	12.0618	23766.2	0	?	0	540	0
1092	12.0728	23766.8	0	?	0	540	0
1093	12.0839	23821.3	0	?	0	540	0
1094	12.0949	23807.9	0	?	0	540	0
1095	12.106	23781.1	0	?	0	540	0
1096	12.117	23822.1	0	?	0	540	0
1097	12.1281	23794.8	0	?	0	540	0
1098	12.1391	23749.8	0	?	0	540	0
1099	12.1501	23787.5	0	?	0	540	0
1100	12.1612	23768.9	0	?	0	540	0
1101	12.1722	23799	0	?	0	540	0
1102	12.1833	23833.6	0	?	0	540	0
1103	12.1943	23830.7	0	?	0	540	0
1104	12.2054	23806.4	0	?	0	540	0
1105	12.2164	23818.9	0	?	0	540	0
1106	12.2275	23808.8	0	?	0	540	0
1107	12.2385	23782.7	0	?	0	540	0
1108	12.2496	23823.8	0	?	0	540	0
1109	12.2606	23768	0	?	0	540	0
1110	12.2716	23870.4	0	?	0	540	0
1111	12.2827	23814	0	?	0	540	0
1112	12.2937	23801	0	?	0	540	0
1113	12.3048	23845.4	0	?	0	540	0
1114	12.3158	23765.6	0	?	0	540	0
1115	12.3269	23789.8	0	?	0	540	0
1116	12.3379	23798.3	0	?	0	540	0
1117	12.349	23743.9	0	?	0	540	0
1118	12.36	23788.1	0	?	0	540	0
1119	12.3711	23778.2	0	?	0	540	0
1120	12.3821	23801.9	0	?	0	540	0
1121	12.3931	23791.1	0	?	0	540	0
1122	12.4042	23736.9	0	?	0	540	0
1123	12.4152	23782	0	?	0	540	0
1124	12.4263	23761.1	0	?	0	540	0
1125	12.4373	23808.7	0	?	0	540	0
1126	12.4484	23793.9	0	?	0	540	0
1127	12.4594	23793.1	0	?	0	540	0
1128	12.4705	23787.7	0	?	0	540	0
1129	12.4815	23785	0	?	0	540	0
1130	12.4926	23730.3	0	?	0	540	0
1131	12.5036	23770	0	?	0	540	0
1132	12.5146	23766.7	0	?	0	540	0
1133	12.5257	23806.9	0	?	0	540	0
1134	12.5367	23768.5	0	?	0	540	0
1135	12.5478	23786.6	0	?	0	540	0
1136	12.5588	23804.2	0	?	0	540	0
1137	12.5699	23820.9	0	?	0	540	0
1138	12.5809	23783.2	0	?	0	540	0
1139	12.592	23737.8	0	?	0	540	0
1140	12.603	23794.5	0	?	0	540	0
1141	12.6141	23838.4	0	?	0	540	0
1142	12.6251	23819.3	0	?	0	540	0
1143	12.6361	23800.8	0	?	0	540	0
1144	12.6472	23761.3	0	?	0	540	0
1145	12.6582	23795.5	0	?	0	540	0
1146	12.6693	23820	0	?	0	540	0
1147	12.6803	23817.8	0	?	0	540	0
1148	12.6914	23762.7	0	?	0	540	0
1149	12.7024	23812.3	0	?	0	540	0
1150	12.7135	23785.4	0	?	0	540	0
1151	12.7245	23758.8	0	?	0	540	0
1152	12.7356	23808	0	?	0	540	0
1153	12.7466	23795.1	0	?	0	540	0
1154	12.7576	23754	0	?	0	540	0
1155	12.7687	23788	0	?	0	540	0
1156	12.7797	23808.2	0	?	0	540	0
1157	12.7908	23826	0	?	0	540	0
1158	12.8018	23716.6	0	?	0	540	0
1159	12.8129	23784	0	?	0	540	0
1160	12.8239	23802.2	0	?	0	540	0
1161	12.835	23798.8	0	?	0	540	0
1162	12.846	23779.5	0	?	0	540	0
1163	12.8571	23778	0	?	0	540	0
1164	12.8681	23785.1	0	?	0	540	0
1165	12.8791	23739.7	0	?	0	540	0
1166	12.8902	23824.4	0	?	0	540	0
1167	12.9012	23752.1	0	?	0	540	0
1168	12.9123	23755.3	0	?	0	540	0
1169	12.9233	23761.6	0	?	0	540	0
1170	12.9344	23752.9	0	?	0	540	0
1171	12.9454	23711.7	0	?	0	540	0
1172	12.9565	23766.7	0	?	0	540	0
1173	12.9675	23748.2	0	?	0	540	0
1174	12.9786	23777.2	0	?	0	540	0
1175	12.9896	23757.4	0	?	0	540	0
1176	13.0007	23727.1	0	?	0	540	0
1177	13.0117	23778.2	0	?	0	540	0
1178	13.0227	23763.4	0	?	0	540	0
1179	13.0338	23756.7	0	?	0	540	0
1180	13.0448	23808.7	0	?	0	540	0
1181	13.0559	23753.9	0	?	0	540	0
1182	13.0669	23735.5	0	?	0	540	0
1183	13.078	23795.2	0	?	0	540	0
1184	13.089	23768.2	0	?	0	540	0
1185	13.1001	23739	0	?	0	540	0
1186	13.1111	23761.1	0	?	0	540	0
1187	13.1222	23748.5	0	?	0	540	0
1188	13.1332	23716.5	0	?	0	540	0
1189	13.1442	23704.2	0	?	0	540	0
1190	13.1553	23709.4	0	?	0	540	0
1191	13.1663	23783.4	0	?	0	540	0
1192	13.1774	23773.7	0	?	0	540	0
1193	13.1884	23775.2	0	?	0	540	0
1194	13.1995	23719.1	0	?	0	540	0
1195	13.2105	23740.7	0	?	0	540	0
1196	13.2216	23734.8	0	?	0	540	0
1197	13.2326	23725.1	0	?	0	540	0
1198	13.2437	23704.4	0	?	0	540	0
1199	13.2547	23772.4	0	?	0	540	0
1200	13.2657	23700.1	0	?	0	540	0
1201	13.2768	23701.8	0	?	0	540	0
1202	13.2878	23748.3	0	?	0	540	0
1203	13.2989	23728.4	0	?	0	540	0
1204	13.3099	23784.1	0	?	0	540	0
1205	13.321	23668.8	0	?	0	540	0
1206	13.332	23738.6	0	?	0	540	0
1207	13.3431	23744.7	0	?	0	540	0
1208	13.3541	23756.9	0	?	0	540	0
1209	13.3652	23742.7	0	?	0	540	0
1210	13.3762	23706.1	0	?	0	540	0
1211	13.3872	23721.3	0	?	0	540	0
1212	13.3983	23743.8	0	?	0	540	0
1213	13.4093	23757.3	0	?	0	540	0
1214	13.4204	23726.1	0	?	0	540	0
1215	13.4314	23720.1	0	?	0	540	0
1216	13.4425	23742.5	0	?	0	540	0
1217	13.4535	23703.5	0	?	0	540	0
1218	13.4646	23726.1	0	?	0	540	0
1219	13.4756	23709.2	0	?	0	540	0
1220	13.4867	23677	0	?	0	540	0
1221	13.4977	23717.9	0	?	0	540	0
1222	13.5087	23712.1	0	?	0	540	0
1223	13.5198	23758.7	0	?	0	540	0
1224	13.5308	23739	0	?	0	540	0
1225	13.5419	23688.3	0	?	0	540	0
1226	13.5529	23695	0	?	0	540	0
1227	13.564	23724.3	0	?	0	540	0
1228	13.575	23685.4	0	?	0	540	0
1229	13.5861	23736.1	0	?	0	540	0
1230	13.5971	23693.6	0	?	0	540	0
1231	13.6082	23676.4	0	?	0	540	0
1232	13.6192	23714.4	0	?	0	540	0
1233	13.6302	23699.1	0	?	0	540	0
1234	13.6413	23670.3	0	?	0	540	0
1235	13.6523	23696.7	0	?	0	540	0
1236	13.6634	23684.7	0	?	0	540	0
1237	13.6744	23699.9	0	?	0	540	0
1238	13.6855	23687.6	0	?	0	540	0
1239	13.6965	23710.2	0	?	0	540	0
1240	13.7076	23669	0	?	0	540	0
1241	13.7186	23685.5	0	?	0	540	0
1242	13.7297	23672.6	0	?	0	540	0
1243	13.7407	23727	0	?	0	540	0
1244	13.7518	23694.2	0	?	0	540	0
1245	13.7628	23735.3	0	?	0	540	0
1246	13.7738	23721.3	0	?	0	540	0
1247	13.7849	23701.3	0	?	0	540	0
1248	13.7959	23693.9	0	?	0	540	0
1249	13.807	23722	0	?	0	540	0
1250	13.818	23667.6	0	?	0	540	0
1251	13.8291	23731.4	0	?	0	540	0
1252	13.8401	23629.8	0	?	0	540	0
1253	13.8512	23689.2	0	?	0	540	0
1254	13.8622	23647.4	0	?	0	540	0
1255	13.8733	23694.7	0	?	0	540	0
1256	13.8843	23681.9	0	?	0	540	0
1257	13.8953	23682.2	0	?	0	540	0
1258	13.9064	23717.3	0	?	0	540	0
1259	13.9174	23699.3	0	?	0	540	0
1260	13.9285	23720	0	?	0	540	0
1261	13.9395	23684.4	0	?	0	540	0
1262	13.9506	23657.1	0	?	0	540	0
1263	13.9616	23639.1	0	?	0	540	0
1264	13.9727	23681.7	0	?	0	540	0
1265	13.9837	23687.5	0	?	0	540	0
1266	13.9948	23676.2	0	?	0	540	0
1267	14.0058	23744.9	0	?	0	540	0
1268	14.0168	23699.3	0	?	0	540	0
1269	14.0279	23732.5	0	?	0	540	0
1270	14.0389	23668.5	0	?	0	540	0
1271	14.05	23681.8	0	?	0	540	0
1272	14.061	23700.7	0	?	0	540	0
1273	14.0721	23704	0	?	0	540	0
1274	14.0831	23711.6	0	?	0	540	0
1275	14.0942	23736.8	0	?	0	540	0
1276	14.1052	23678.8	0	?	0	540	0
1277	14.1163	23642.7	0	?	0	540	0
1278	14.1273	23639.9	0	?	0	540	0
1279	14.1383	23646.4	0	?	0	540	0
1280	14.1494	23629.6	0	?	0	540	0
1281	14.1604	23686.4	0	?	0	540	0
1282	14.1715	23657.9	0	?	0	540	0
1283	14.1825	23662.1	0	?	0	540	0
1284	14.1936	23683	0	?	0	540	0
1285	14.2046	23659.3	0	?	0	540	0
1286	14.2157	23668.4	0	?	0	540	0
1287	14.2267	23687.3	0	?	0	540	0
1288	14.2378	23674.4	0	?	0	540	0
1289	14.2488	23704.1	0	?	0	540	0
1290	14.2598	23694.7	0	?	0	540	0
1291	14.2709	23600.3	0	?	0	540	0
1292	14.2819	23665.4	0	?	0	540	0
1293	14.293	23622.9	0	?	0	540	0
1294	14.304	23693	0	?	0	540	0
1295	14.3151	23661.8	0	?	0	540	0
1296	14.3261	23652	0	?	0	540	0
1297	14.3372	23633.6	0	?	0	540	0
1298	14.3482	23650.1	0	?	0	540	0
1299	14.3593	23669.3	0	?	0	540	0
1300	14.3703	23667.8	0	?	0	540	0
1301	14.3813	23690.2	0	?	0	540	0
1302	14.3924	23646.7	0	?	0	540	0
1303	14.4034	23633.9	0	?	0	540	0
1304	14.4145	23652.2	0	?	0	540	0
1305	14.4255	23638.1	0	?	0	540	0
1306	14.4366	23687.9	0	?	0	540	0
1307	14.4476	23678.6	0	?	0	540	0
1308	14.4587	23692.9	0	?	0	540	0
1309	14.4697	23624.9	0	?	0	540	0
1310	14.4808	23678.1	0	?	0	540	0
1311	14.4918	23653.7	0	?	0	540	0
1312	14.5029	23671.7	0	?	0	540	0
1313	14.5139	23646.5	0	?	0	540	0
1314	14.5249	23667.6	0	?	0	540	0
1315	14.536	23663.8	0	?	0	540	0
1316	14.547	23667.3	0	?	0	540	0
1317	14.5581	23629.7	0	?	0	540	0
1318	14.5691	23647.5	0	?	0	540	0
1319	14.5802	23629	0	?	0	540	0
1320	14.5912	23660.7	0	?	0	540	0
1321	14.6023	23661.8	0	?	0	540	0
1322	14.6133	23623.9	0	?	0	540	0
1323	14.6244	23639.5	0	?	0	540	0
1324	14.6354	23677.9	0	?	0	540	0
1325	14.6464	23650.8	0	?	0	540	0
1326	14.6575	23680.5	0	?	0	540	0
1327	14.6685	23673	0	?	0	540	0
1328	14.6796	23632.4	0	?	0	540	0
1329	14.6906	23696.4	0	?	0	540	0
1330	14.7017	23660.6	0	?	0	540	0
1331	14.7127	23646.2	0	?	0	540	0
1332	14.7238	23647.4	0	?	0	540	0
1333	14.7348	23628	0	?	0	540	0
1334	14.7459	23613.6	0	?	0	540	0
1335	14.7569	23643.1	0	?	0	540	0
1336	14.7679	23670.2	0	?	0	540	0
1337	14.779	23668.1	0	?	0	540	0
1338	14.79	23671.8	0	?	0	540	0
1339	14.8011	23672.4	0	?	0	540	0
1340	14.8121	23654.2	0	?	0	540	0
1341	14.8232	23614.5	0	?	0	540	0
1342	14.8342	23634.6	0	?	0	540	0
1343	14.8453	23604.9	0	?	0	540	0
1344	14.8563	23614	0	?	0	540	0
1345	14.8674	23622.1	0	?	0	540	0
1346	14.8784	23636.4	0	?	0	540	0
1347	14.8894	23608.5	0	?	0	540	0
1348	14.9005	23627.3	0	?	0	540	0
1349	14.9115	23596	0	?	0	540	0
1350	14.9226	23638.7	0	?	0	540	0
1351	14.9336	23646	0	?	0	540	0
1352	14.9447	23615.3	0	?	0	540	0
1353	14.9557	23623.2	0	?	0	540	0
1354	14.9668	23661.8	0	?	0	540	0
1355	14.9778	23642.5	0	?	0	540	0
1356	14.9889	23634.2	0	?	0	540	0
1357	14.9999	23627.1	0	?	0	540	0
1358	15.0109	23647.9	0	?	0	540	0
1359	15.022	23652.7	0	?	0	540	0
1360	15.033	23625.2	0	?	0	540	0
1361	15.0441	23662.5	0	?	0	540	0
1362	15.0551	23617.8	0	?	0	540	0
1363	15.0662	23644.9	0	?	0	540	0
1364	15.0772	23611	0	?	0	540	0
1365	15.0883	23606.1	0	?	0	540	0
1366	15.0993	23635.7	0	?	0	540	0
1367	15.1104	23564.9	0	?	0	540	0
1368	15.1214	23558.1	0	?	0	540	0
1369	15.1324	23588.7	0	?	0	540	0
1370	15.1435	23545.1	0	?	0	540	0
1371	15.1545	23594.4	0	?	0	540	0
1372	15.1656	23574.3	0	?	0	540	0
1373	15.1766	23613.7	0	?	0	540	0
1374	15.1877	23537	0	?	0	540	0
1375	15.1987	23620.8	0	?	0	540	0
1376	15.2098	23600	0	?	0	540	0
1377	15.2208	23639	0	?	0	540	0
1378	15.2319	23589.3	0	?	0	540	0
1379	15.2429	23635.5	0	?	0	540	0
1380	15.254	23589.9	0	?	0	540	0
1381	15.265	23594.7	0	?	0	540	0
1382	15.276	23558.6	0	?	0	540	0
1383	15.2871	23574.1	0	?	0	540	0
1384	15.2981	23605.2	0	?	0	540	0
1385	15.3092	23593.1	0	?	0	540	0
1386	15.3202	23582.3	0	?	0	540	0
1387	15.3313	23584.7	0	?	0	540	0
1388	15.3423	23599.7	0	?	0	540	0
1389	15.3534	23584.3	0	?	0	540	0
1390	15.3644	23631	0	?	0	540	0
1391	15.3755	23604.9	0	?	0	540	0
1392	15.3865	23545.4	0	?	0	540	0
1393	15.3975	23610.6	0	?	0	540	0
1394	15.4086	23522.3	0	?	0	540	0
1395	15.4196	23570.2	0	?	0	540	0
1396	15.4307	23564.6	0	?	0	540	0
1397	15.4417	23601.8	0	?	0	540	0
1398	15.4528	23531.8	0	?	0	540	0
1399	15.4638	23547.9	0	?	0	540	0
1400	15.4749	23560.1	0	?	0	540	0
1401	15.4859	23587.1	0	?	0	540	0
1402	15.497	23567.7	0	?	0	540	0
1403	15.508	23578.3	0	?	0	540	0
1404	15.519	23568.1	0	?	0	540	0
1405	15.5301	23547.1	0	?	0	540	0
1406	15.5411	23543.5	0	?	0	540	0
1407	15.5522	23566.7	0	?	0	540	0
1408	15.5632	23608.9	0	?	0	540	0
1409	15.5743	23581.6	0	?	0	540	0
1410	15.5853	23606	0	?	0	540	0
1411	15.5964	23561.5	0	?	0	540	0
1412	15.6074	23535.9	0	?	0	540	0
1413	15.6185	23559	0	?	0	540	0
1414	15.6295	23558.5	0	?	0	540	0
1415	15.6405	23537.6	0	?	0	540	0
1416	15.6516	23567.4	0	?	0	540	0
1417	15.6626	23591.3	0	?	0	540	0
1418	15.6737	23527.6	0	?	0	540	0
1419	15.6847	23571.7	0	?	0	540	0
1420	15.6958	23554.8	0	?	0	540	0
1421	15.7068	23525.4	0	?	0	540	0
1422	15.7179	23592	0	?	0	540	0
1423	15.7289	23569	0	?	0	540	0
1424	15.74	23585.7	0	?	0	540	0
1425	15.751	23615.8	0	?	0	540	0
1426	15.762	23569.3	0	?	0	540	0
1427	15.7731	23581.3	0	?	0	540	0
1428	15.7841	23564.4	0	?	0	540	0
1429	15.7952	23609.4	0	?	0	540	0
1430	15.8062	23606.6	0	?	0	540	0
1431	15.8173	23609.9	0	?	0	540	0
1432	15.8283	23629	0	?	0	540	0
1433	15.8394	23565.6	0	?	0	540	0
1434	15.8504	23573.5	0	?	0	540	0
1435	15.8615	23521.6	0	?	0	540	0
1436	15.8725	23551.8	0	?	0	540	0
1437	15.8835	23548.8	0	?	0	540	0
1438	15.8946	23536.4	0	?	0	540	0
1439	15.9056	23608.1	0	?	0	540	0
1440	15.9167	23576.8	0	?	0	540	0
1441	15.9277	23588	0	?	0	540	0
1442	15.9388	23597.6	0	?	0	540	0
1443	15.9498	23566.1	0	?	0	540	0
1444	15.9609	23490.5	0	?	0	540	0
1445	15.9719	23610.9	0	?	0	540	0
1446	15.983	23541.6	0	?	0	540	0
1447	15.994	23579.7	0	?	0	540	0
1448	16.005	23614.3	0	?	0	540	0
1449	16.0161	23554.1	0	?	0	540	0
1450	16.0271	23594	0	?	0	540	0
1451	16.0382	23590.5	0	?	0	540	0
1452	16.0492	23561.6	0	?	0	540	0
1453	16.0603	23582.4	0	?	0	540	0
1454	16.0713	23567	0	?	0	540	0
1455	16.0824	23645.3	0	?	0	540	0
1456	16.0934	23608.7	0	?	0	540	0
1457	16.1045	23553.1	0	?	0	540	0
1458	16.1155	23555.2	0	?	0	540	0
1459	16.1266	23529.9	0	?	0	540	0
1460	16.1376	23583.8	0	?	0	540	0
1461	16.1486	23501.1	0	?	0	540	0
1462	16.1597	23539.7	0	?	0	540	0
1463	16.1707	23555.5	0	?	0	540	0
1464	16.1818	23517.9	0	?	0	540	0
1465	16.1928	23593.5	0	?	0	540	0
1466	16.2039	23563.4	0	?	0	540	0
1467	16.2149	23541.1	0	?	0	540	0
1468	16.226	23551.1	0	?	0	540	0
1469	16.237	23511.6	0	?	0	540	0
1470	16.2481	23547.3	0	?	0	540	0
1471	16.2591	23568.5	0	?	0	540	0
1472	16.2701	23497	0	?	0	540	0
1473	16.2812	23566.2	0	?	0	540	0
1474	16.2922	23561.3	0	?	0	540	0
1475	16.3033	23542	0	?	0	540	0
1476	16.3143	23513.4	0	?	0	540	0
1477	16.3254	23532.1	0	?	0	540	0
1478	16.3364	23573	0	?	0	540	0
1479	16.3475	23524.9	0	?	0	540	0
1480	16.3585	23532.4	0	?	0	540	0
1481	16.3696	23524	0	?	0	540	0
1482	16.3806	23521.2	0	?	0	540	0
1483	16.3916	23533.9	0	?	0	540	0
1484	16.4027	23517.4	0	?	0	540	0
1485	16.4137	23521.5	0	?	0	540	0
1486	16.4248	23559.7	0	?	0	540	0
1487	16.4358	23497.6	0	?	0	540	0
1488	16.4469	23569.4	0	?	0	540	0
1489	16.4579	23549	0	?	0	540	0
1490	16.469	23486.4	0	?	0	540	0
1491	16.48	23513.5	0	?	0	540	0
1492	16.4911	23522.2	0	?	0	540	0
1493	16.5021	23517.2	0	?	0	540	0
1494	16.5131	23519.8	0	?	0	540	0
1495	16.5242	23533.6	0	?	0	540	0
1496	16.5352	23519.9	0	?	0	540	0
1497	16.5463	23509.1	0	?	0	540	0
1498	16.5573	23518.2	0	?	0	540	0
1499	16.5684	23546.8	0	?	0	540	0
1500	16.5794	23526.8	0	?	0	540	0
1501	16.5905	23528.9	0	?	0	540	0
1502	16.6015	23559.4	0	?	0	540	0
1503	16.6126	23588.5	0	?	0	540	0
1504	16.6236	23506.6	0	?	0	540	0
1505	16.6346	23569.8	0	?	0	540	0
1506	16.6457	23557.4	0	?	0	540	0
1507	16.6567	23497.8	0	?	0	540	0
1508	16.6678	23506.1	0	?	0	540	0
1509	16.6788	23503.4	0	?	0	540	0
1510	16.6899	23552	0	?	0	540	0
1511	16.7009	23533.9	0	?	0	540	0
1512	16.712	23572	0	?	0	540	0
1513	16.723	23483.8	0	?	0	540	0
1514	16.7341	23508.4	0	?	0	540	0
1515	16.7451	23443.6	0	?	0	540	0
1516	16.7561	23484.4	0	?	0	540	0
1517	16.7672	23543.8	0	?	0	540	0
1518	16.7782	23507.1	0	?	0	540	0
1519	16.7893	23560.5	0	?	0	540	0
1520	16.8003	23480.2	0	?	0	540	0
1521	16.8114	23475.1	0	?	0	540	0
1522	16.8224	23492.9	0	?	0	540	0
1523	16.8335	23481.5	0	?	0	540	0
1524	16.8445	23429.7	0	?	0	540	0
1525	16.8556	23489.1	0	?	0	540	0
1526	16.8666	23476.6	0	?	0	540	0
1527	16.8777	23493.7	0	?	0	540	0
1528	16.8887	23473.8	0	?	0	540	0
1529	16.8997	23511.6	0	?	0	540	0
1530	16.9108	23482.7	0	?	0	540	0
1531	16.9218	23516.1	0	?	0	540	0
1532	16.9329	23449.2	0	?	0	540	0
1533	16.9439	23475.8	0	?	0	540	0
1534	16.955	23472.8	0	?	0	540	0
1535	16.966	23505.2	0	?	0	540	0
1536	16.9771	23482.2	0	?	0	540	0
1537	16.9881	23487.5	0	?	0	540	0
1538	16.9992	23517.2	0	?	0	540	0
1539	17.0102	23488.3	0	?	0	540	0
1540	17.0212	23478.3	0	?	0	540	0
1541	17.0323	23467.6	0	?	0	540	0
1542	17.0433	23476.3	0	?	0	540	0
1543	17.0544	23520.6	0	?	0	540	0
1544	17.0654	23467.6	0	?	0	540	0
1545	17.0765	23538	0	?	0	540	0
1546	17.0875	23554.7	0	?	0	540	0
1547	17.0986	23444.2	0	?	0	540	0
1548	17.1096	23410	0	?	0	540	0
1549	17.1207	23462.8	0	?	0	540	0
1550	17.1317	23468.9	0	?	0	540	0
1551	17.1427	23526.8	0	?	0	540	0
1552	17.1538	23514.3	0	?	0	540	0
1553	17.1648	23536.1	0	?	0	540	0
1554	17.1759	23493.5	0	?	0	540	0
1555	17.1869	23504.3	0	?	0	540	0
1556	17.198	23466.1	0	?	0	540	0
1557	17.209	23447.7	0	?	0	540	0
1558	17.2201	23466.5	0	?	0	540	0
1559	17.2311	23508.6	0	?	0	540	0
1560	17.2422	23486.7	0	?	0	540	0
1561	17.2532	23485.7	0	?	0	540	0
1562	17.2642	23552	0	?	0	540	0
1563	17.2753	23513.8	0	?	0	540	0
1564	17.2863	23513.9	0	?	0	540	0
1565	17.2974	23467.2	0	?	0	540	0
1566	17.3084	23461.3	0	?	0	540	0
1567	17.3195	23457	0	?	0	540	0
1568	17.3305	23440.6	0	?	0	540	0
1569	17.3416	23417.3	0	?	0	540	0
1570	17.3526	23446.9	0	?	0	540	0
1571	17.3637	23510.3	0	?	0	540	0
1572	17.3747	23495.2	0	?	0	540	0
1573	17.3857	23437.2	0	?	0	540	0
1574	17.3968	23442.1	0	?	0	540	0
1575	17.4078	23477	0	?	0	540	0
1576	17.4189	23496.6	0	?	0	540	0
1577	17.4299	23497.9	0	?	0	540	0
1578	17.441	23458.6	0	?	0	540	0
1579	17.452	23448.5	0	?	0	540	0
1580	17.4631	23492	0	?	0	540	0
1581	17.4741	23449.2	0	?	0	540	0
1582	17.4852	23461.2	0	?	0	540	0
1583	17.4962	23527.6	0	?	0	540	0
1584	17.5072	23520.3	0	?	0	540	0
1585	17.5183	23424.4	0	?	0	540	0
1586	17.5293	23458.5	0	?	0	540	0
1587	17.5404	23428.8	0	?	0	540	0
1588	17.5514	23423.4	0	?	0	540	0
1589	17.5625	23414.9	0	?	0	540	0
1590	17.5735	23444.9	0	?	0	540	0
1591	17.5846	23489.7	0	?	0	540	0
1592	17.5956	23482.4	0	?	0	540	0
1593	17.6067	23473.9	0	?	0	540	0
1594	17.6177	23435.8	0	?	0	540	0
1595	17.6288	23478	0	?	0	540	0
1596	17.6398	23437.4	0	?	0	540	0
1597	17.6508	23477.8	0	?	0	540	0
1598	17.6619	23431.2	0	?	0	540	0
1599	17.6729	23441.4	0	?	0	540	0
1600	17.684	23426.6	0	?	0	540	0
1601	17.695	23477.9	0	?	0	540	0
1602	17.7061	23506.1	0	?	0	540	0
1603	17.7171	23498.3	0	?	0	540	0
1604	17.7282	23475.2	0	?	0	540	0
1605	17.7392	23452.5	0	?	0	540	0
1606	17.7503	23496.2	0	?	0	540	0
1607	17.7613	23468.3	0	?	0	540	0
1608	17.7723	23483.7	0	?	0	540	0
1609	17.7834	23486.9	0	?	0	540	0
1610	17.7944	23496.1	0	?	0	540	0
1611	17.8055	23500.4	0	?	0	540	0
1612	17.8165	23507.5	0	?	0	540	0
1613	17.8276	23535.5	0	?	0	540	0
1614	17.8386	23451.2	0	?	0	540	0
1615	17.8497	23455	0	?	0	540	0
1616	17.8607	23475.2	0	?	0	540	0
1617	17.8718	23489	0	?	0	540	0
1618	17.8828	23477.4	0	?	0	540	0
1619	17.8938	23451.1	0	?	0	540	0
1620	17.9049	23488.7	0	?	0	540	0
1621	17.9159	23498.9	0	?	0	540	0
1622	17.927	23517.2	0	?	0	540	0
1623	17.938	23467.8	0	?	0	540	0
1624	17.9491	23429.1	0	?	0	540	0
1625	17.9601	23457.2	0	?	0	540	0
1626	17.9712	23419.6	0	?	0	540	0
1627	17.9822	23498.9	0	?	0	540	0
1628	17.9933	23497.8	0	?	0	540	0
1629	18.0043	23475.9	0	?	0	540	0
1630	18.0153	23476.4	0	?	0	540	0
1631	18.0264	23480	0	?	0	540	0
1632	18.0374	23461.9	0	?	0	540	0
1633	18.0485	23472.2	0	?	0	540	0
1634	18.0595	23517.5	0	?	0	540	0
1635	18.0706	23486.2	0	?	0	540	0
1636	18.0816	23492.4	0	?	0	540	0
1637	18.0927	23435.5	0	?	0	540	0
1638	18.1037	23476.2	0	?	0	540	0
1639	18.1148	23439.7	0	?	0	540	0
1640	18.1258	23450.2	0	?	0	540	0
1641	18.1368	23484	0	?	0	540	0
1642	18.1479	23517.1	0	?	0	540	0
1643	18.1589	23488.7	0	?	0	540	0
1644	18.17	23466.7	0	?	0	540	0
1645	18.181	23490.7	0	?	0	540	0
1646	18.1921	23455.5	0	?	0	540	0
1647	18.2031	23431.4	0	?	0	540	0
1648	18.2142	23400.2	0	?	0	540	0
1649	18.2252	23430.6	0	?	0	540	0
1650	18.2363	23413.4	0	?	0	540	0
1651	18.2473	23445.7	0	?	0	540	0
1652	18.2583	23448.7	0	?	0	540	0
1653	18.2694	23511.7	0	?	0	540	0
1654	18.2804	23486.1	0	?	0	540	0
1655	18.2915	23449.8	0	?	0	540	0
1656	18.3025	23439.9	0	?	0	540	0
1657	18.3136	23472.9	0	?	0	540	0
1658	18.3246	23437	0	?	0	540	0
1659	18.3357	23469.7	0	?	0	540	0
1660	18.3467	23457.5	0	?	0	540	0
1661	18.3578	23493.6	0	?	0	540	0
1662	18.3688	23449.3	0	?	0	540	0
1663	18.3799	23447.4	0	?	0	540	0
1664	18.3909	23416.6	0	?	0	540	0
1665	18.4019	23496.8	0	?	0	540	0
1666	18.413	23438.8	0	?	0	540	0
1667	18.424	23411.6	0	?	0	540	0
1668	18.4351	23410.5	0	?	0	540	0
1669	18.4461	23432.2	0	?	0	540	0
1670	18.4572	23403.6	0	?	0	540	0
1671	18.4682	23399.1	0	?	0	540	0
1672	18.4793	23404.6	0	?	0	540	0
1673	18.4903	23422.7	0	?	0	540	0
1674	18.5014	23387.3	0	?	0	540	0
1675	18.5124	23389.3	0	?	0	540	0
1676	18.5234	23424.2	0	?	0	540	0
1677	18.5345	23414.3	0	?	0	540	0
1678	18.5455	23409	0	?	0	540	0
1679	18.5566	23364.4	0	?	0	540	0
1680	18.5676	23442.3	0	?	0	540	0
1681	18.5787	23418.9	0	?	0	540	0
1682	18.5897	23416.7	0	?	0	540	0
1683	18.6008	23448.3	0	?	0	540	0
1684	18.6118	23431.9	0	?	0	540	0
1685	18.6229	23400.6	0	?	0	540	0
1686	18.6339	23398	0	?	0	540	0
1687	18.6449	23398.9	0	?	0	540	0
1688	18.656	23434.5	0	?	0	540	0
1689	18.667	23420	0	?	0	540	0
1690	18.6781	23454.4	0	?	0	540	0
1691	18.6891	23429.7	0	?	0	540	0
1692	18.7002	23400.9	0	?	0	540	0
1693	18.7112	23424.3	0	?	0	540	0
1694	18.7223	23382.6	0	?	0	540	0
1695	18.7333	23387.6	0	?	0	540	0
1696	18.7444	23423.8	0	?	0	540	0
1697	18.7554	23421.3	0	?	0	540	0
1698	18.7664	23456.8	0	?	0	540	0
1699	18.7775	23373.5	0	?	0	540	0
1700	18.7885	23353.8	0	?	0	540	0
1701	18.7996	23383.3	0	?	0	540	0
1702	18.8106	23371.9	0	?	0	540	0
1703	18.8217	23371.1	0	?	0	540	0
1704	18.8327	23381	0	?	0	540	0
1705	18.8438	23396.1	0	?	0	540	0
1706	18.8548	23377.9	0	?	0	540	0
1707	18.8659	23402.3	0	?	0	540	0
1708	18.8769	23351.8	0	?	0	540	0
1709	18.8879	23371.8	0	?	0	540	0
1710	18.899	23353	0	?	0	540	0
1711	18.91	23428.3	0	?	0	540	0
1712	18.9211	23335.1	0	?	0	540	0
1713	18.9321	23338.6	0	?	0	540	0
1714	18.9432	23317.8	0	?	0	540	0
1715	18.9542	23374.3	0	?	0	540	0
1716	18.9653	23355.9	0	?	0	540	0
1717	18.9763	23371.5	0	?	0	540	0
1718	18.9874	23337	0	?	0	540	0
1719	18.9984	23368.9	0	?	0	540	0
1720	19.0094	23357.7	0	?	0	540	0
1721	19.0205	23330.3	0	?	0	540	0
1722	19.0315	23309.4	0	?	0	540	0
1723	19.0426	23350.8	0	?	0	540	0
1724	19.0536	23322.5	0	?	0	540	0
1725	19.0647	23357.9	0	?	0	540	0
1726	19.0757	23348.8	0	?	0	540	0
1727	19.0868	23392.5	0	?	0	540	0
1728	19.0978	23315.9	0	?	0	540	0
1729	19.1089	23371.9	0	?	0	540	0
1730	19.1199	23359.7	0	?	0	540	0
1731	19.1309	23332.1	0	?	0	540	0
1732	19.142	23287.4	0	?	0	540	0
1733	19.153	23341.4	0	?	0	540	0
1734	19.1641	23349	0	?	0	540	0
1735	19.1751	23352.3	0	?	0	540	0
1736	19.1862	23346.9	0	?	0	540	0
1737	19.1972	23381.4	0	?	0	540	0
1738	19.2083	23341.5	0	?	0	540	0
1739	19.2193	23382.4	0	?	0	540	0
1740	19.2304	23330.6	0	?	0	540	0
1741	19.2414	23394.6	0	?	0	540	0
1742	19.2525	23370.1	0	?	0	540	0
1743	19.2635	23365.1	0	?	0	540	0
1744	19.2745	23361	0	?	0	540	0
1745	19.2856	23384	0	?	0	540	0
1746	19.2966	23362.5	0	?	0	540	0
1747	19.3077	23389.2	0	?	0	540	0
1748	19.3187	23335.9	0	?	0	540	0
1749	19.3298	23376.9	0	?	0	540	0
1750	19.3408	23401	0	?	0	540	0
1751	19.3519	23390.1	0	?	0	540	0
1752	19.3629	23436.2	0	?	0	540	0
1753	19.374	23374.5	0	?	0	540	0
1754	19.385	23333.2	0	?	0	540	0
1755	19.396	23394.8	0	?	0	540	0
1756	19.4071	23394.5	0	?	0	540	0
1757	19.4181	23381.6	0	?	0	540	0
1758	19.4292	23400.6	0	?	0	540	0
1759	19.4402	23389	0	?	0	540	0
1760	19.4513	23344.1	0	?	0	540	0
1761	19.4623	23359.6	0	?	0	540	0
1762	19.4734	23340.8	0	?	0	540	0
1763	19.4844	23359.6	0	?	0	540	0
1764	19.4955	23350.1	0	?	0	540	0
1765	19.5065	23368.4	0	?	0	540	0
1766	19.5175	23388.7	0	?	0	540	0
1767	19.5286	23387.5	0	?	0	540	0
1768	19.5396	23383	0	?	0	540	0
1769	19.5507	23398	0	?	0	540	0
1770	19.5617	23382.7	0	?	0	540	0
1771	19.5728	23347.1	0	?	0	540	0
1772	19.5838	23291.8	0	?	0	540	0
1773	19.5949	23328.4	0	?	0	540	0
1774	19.6059	23388.9	0	?	0	540	0
1775	19.617	23367.2	0	?	0	540	0
1776	19.628	23360.8	0	?	0	540	0
1777	19.639	23322.5	0	?	0	540	0
1778	19.6501	23347.8	0	?	0	540	0
1779	19.6611	23355	0	?	0	540	0
1780	19.6722	23363.7	0	?	0	540	0
1781	19.6832	23372.1	0	?	0	540	0
1782	19.6943	23347.2	0	?	0	540	0
1783	19.7053	23355.9	0	?	0	540	0
1784	19.7164	23360	0	?	0	540	0
1785	19.7274	23285.1	0	?	0	540	0
1786	19.7385	23310.6	0	?	0	540	0
1787	19.7495	23290	0	?	0	540	0
1788	19.7605	23332.1	0	?	0	540	0
1789	19.7716	23298.9	0	?	0	540	0
1790	19.7826	23298.6	0	?	0	540	0
1791	19.7937	23320.6	0	?	0	540	0
1792	19.8047	23358.4	0	?	0	540	0
1793	19.8158	23316.9	0	?	0	540	0
1794	19.8268	23319.9	0	?	0	540	0
1795	19.8379	23345.5	0	?	0	540	0
1796	19.8489	23314.5	0	?	0	540	0
1797	19.86	23346.2	0	?	0	540	0
1798	19.871	23327.2	0	?	0	540	0
1799	19.882	23355.3	0	?	0	540	0
1800	19.8931	23293.1	0	?	0	540	0
1801	19.9041	23318.2	0	?	0	540	0
1802	19.9152	23313.9	0	?	0	540	0
1803	19.9262	23322.8	0	?	0	540	0
1804	19.9373	23341.9	0	?	0	540	0
1805	19.9483	23325	0	?	0	540	0
1806	19.9594	23356.7	0	?	0	540	0
1807	19.9704	23281.9	0	?	0	540	0
1808	19.9815	23361.6	0	?	0	540	0
1809	19.9925	23307.3	0	?	0	540	0
1810	20.0036	23326	0	?	0	540	0
1811	20.0146	23290.9	0	?	0	540	0
1812	20.0256	23332.1	0	?	0	540	0
1813	20.0367	23309.7	0	?	0	540	0
1814	20.0477	23304.6	0	?	0	540	0
1815	20.0588	23292.4	0	?	0	540	0
1816	20.0698	23271.7	0	?	0	540	0
1817	20.0809	23261.4	0	?	0	540	0
1818	20.0919	23250.8	0	?	0	540	0
1819	20.103	23256.3	0	?	0	540	0
1820	20.114	23279.1	0	?	0	540	0
1821	20.1251	23235.5	0	?	0	540	0
1822	20.1361	23294.3	0	?	0	540	0
1823	20.1471	23284.9	0	?	0	540	0
1824	20.1582	23329.1	0	?	0	540	0
1825	20.1692	23283.2	0	?	0	540	0
1826	20.1803	23265.5	0	?	0	540	0
1827	20.1913	23295	0	?	0	540	0
1828	20.2024	23231.7	0	?	0	540	0
1829	20.2134	23238.1	0	?	0	540	0
1830	20.2245	23245.9	0	?	0	540	0
1831	20.2355	23261.7	25198.3	-9.56	-2.03	540	0
1832	20.2466	23243.7	25178.9	-9.63	-2.11	540	0
1833	20.2576	23231.6	25165.9	-9.68	-2.16	542	0
1834	20.2686	23235.1	25169.9	-9.67	-2.15	544	0
1835	20.2797	23248.6	25184.7	-9.61	-2.09	546	0
1836	20.2907	23260.6	25197.8	-9.57	-2.04	548	0
1837	20.3018	23268.7	25206.8	-9.54	-2	550	0
1838	20.3128	23281.7	25221.1	-9.49	-1.95	552	0
1839	20.3239	23342.1	25286.7	-9.25	-1.69	553	0
1840	20.3349	23447	25400.5	-8.84	-1.25	554	0
1841	20.346	23565.6	25529.1	-8.38	-0.75	555	0
1842	20.357	23725	25701.9	-7.76	-0.08	555	0
1843	20.3681	23858.5	25846.7	-7.24	0.49	555	0
1844	20.3791	23949.1	25945	-6.89	0.87	555	0
1845	20.3901	24046.2	26050.4	-6.51	1.28	555	0
1846	20.4012	24134.9	26146.7	-6.17	1.65	555	0
1847	20.4122	24151.5	26164.8	-6.1	1.72	554	0
1848	20.4233	24198	26215.4	-5.92	1.92	553	0
1849	20.4343	24238.8	26259.7	-5.77	2.09	552	0
1850	20.4454	24172.6	26188.2	-6.02	1.81	550	0
1851	20.4564	24219.4	26239	-5.84	2.01	549	0
1852	20.4675	24148.4	26162.3	-6.12	1.71	547	0
1853	20.4785	24098.2	26108	-6.31	1.5	546	0
1854	20.4896	23960.2	25958.7	-6.85	0.92	545	0
1855	20.5006	23910.1	25904.7	-7.04	0.71	545	0
1856	20.5116	23819.9	25807.1	-7.39	0.33	545	0
1857	20.5227	23755.6	25737.6	-7.64	0.06	545	0
1858	20.5337	23791	25776	-7.51	0.21	545	0
1859	20.5448	23719.3	25698.5	-7.79	-0.09	545	-1
1860	20.5558	23684.2	25660.7	-7.92	-0.24	545	-1
1861	20.5669	23675	25650.9	-7.96	-0.28	545	-1
1862	20.5779	23699.7	25677.8	-7.86	-0.17	545	-1
1863	20.589	23680.4	25657	-7.94	-0.25	545	-1
1864	20.6	23623	25595	-8.16	-0.49	545	-1
1865	20.6111	23705.1	25684.2	-7.84	-0.15	545	-1
1866	20.6221	23690.1	25668	-7.9	-0.21	545	-1
1867	20.6331	23704.2	25683.5	-7.84	-0.15	545	-1
1868	20.6442	23688.8	25667	-7.9	-0.21	545	-1
1869	20.6552	23643.4	25617.9	-8.08	-0.4	545	-1
1870	20.6663	23624.7	25597.8	-8.15	-0.48	545	-1
1871	20.6773	23677.6	25655.3	-7.95	-0.26	545	-1
1872	20.6884	23610.2	25582.4	-8.21	-0.54	545	-1
1873	20.6994	23655.9	25632.1	-8.03	-0.35	545	-1
1874	20.7105	23669.1	25646.5	-7.98	-0.29	545	-1
1875	20.7215	23633.7	25608.3	-8.12	-0.44	545	-1
1876	20.7326	23635.8	25610.8	-8.11	-0.43	545	-1
1877	20.7436	23633.9	25608.9	-8.12	-0.44	545	-1
1878	20.7547	23611.9	25585.2	-8.2	-0.53	545	-1
1879	20.7657	23631.5	25606.6	-8.13	-0.45	545	-1
1880	20.7767	23649.3	25626.1	-8.06	-0.37	545	-1
1881	20.7878	23652.6	25629.7	-8.04	-0.36	545	-1
1882	20.7988	23599.8	25572.7	-8.25	-0.58	545	-1
1883	20.8099	23654.8	25632.4	-8.04	-0.35	545	-1
1884	20.8209	23644.9	25621.9	-8.07	-0.39	545	-1
1885	20.832	23613.7	25588.2	-8.2	-0.52	545	-1
1886	20.843	23617.4	25592.3	-8.18	-0.5	545	-1
1887	20.8541	23564.5	25535.2	-8.39	-0.72	545	-1
1888	20.8651	23580	25552.1	-8.33	-0.66	545	-1
1889	20.8762	23606.7	25581.3	-8.22	-0.55	545	-1
1890	20.8872	23634.3	25611.3	-8.12	-0.43	545	-1
1891	20.8982	23581.9	25554.7	-8.32	-0.65	545	-1
1892	20.9093	23611.6	25587	-8.2	-0.52	545	-1
1893	20.9203	23614.7	25590.5	-8.19	-0.51	545	-1
1894	20.9314	23566.3	25538.2	-8.38	-0.71	545	-1
1895	20.9424	23622	25598.7	-8.16	-0.48	545	-1
1896	20.9535	23604.1	25579.5	-8.23	-0.55	545	-1
1897	20.9645	23606.9	25582.7	-8.22	-0.54	545	-1
1898	20.9756	23603.7	25579.3	-8.23	-0.55	545	-1
1899	20.9866	23639.4	25618.2	-8.1	-0.4	545	-1
1900	20.9977	23617.2	25594.3	-8.18	-0.5	545	-1
1901	21.0087	23567.2	25540.3	-8.38	-0.71	545	-1
1902	21.0197	23639.6	25618.9	-8.09	-0.4	545	-1
1903	21.0308	23599.7	25575.8	-8.25	-0.57	545	-1
1904	21.0418	23582.4	25557.1	-8.32	-0.64	545	-1
1905	21.0529	23616.1	25593.8	-8.19	-0.5	545	-1
1906	21.0639	23582	25557	-8.32	-0.64	545	-1
1907	21.075	23592.8	25568.9	-8.28	-0.59	545	-2
1908	21.086	23634.1	25613.8	-8.12	-0.42	544	-2
1909	21.0971	23532.7	25504.1	-8.51	-0.85	543	-2
1910	21.1081	23514.8	25484.8	-8.58	-0.92	542	-2
1911	21.1192	23552.4	25525.7	-8.43	-0.76	541	-2
1912	21.1302	23454.9	25420.2	-8.81	-1.17	540	-2
1913	21.1412	23402.6	25363.7	-9.02	-1.39	540	-2
1914	21.1523	23369.3	25327.7	-9.15	-1.53	540	-2
1915	21.1633	23314.8	25268.8	-9.36	-1.76	540	-2
1916	21.1744	23278.4	25229.4	-9.5	-1.91	540	-2
1917	21.1854	23294.6	25247.2	-9.44	-1.84	540	-2
1918	21.1965	23264.1	25214.3	-9.55	-1.97	540	-2
1919	21.2075	23229.7	25177.2	-9.69	-2.12	540	-2
1920	21.2186	23225.2	25172.4	-9.71	-2.14	540	-2
1921	21.2296	23223.8	25171	-9.71	-2.14	540	-2
1922	21.2407	23173.5	25116.7	-9.91	-2.35	540	-2
1923	21.2517	23203	25148.7	-9.79	-2.23	540	-2
1924	21.2627	23184.3	25128.6	-9.86	-2.31	540	-2
1925	21.2738	23170.7	25114	-9.92	-2.36	540	-2
1926	21.2848	23182.7	25127.2	-9.87	-2.31	540	-2
1927	21.2959	23247	25197	-9.62	-2.04	540	-2
1928	21.3069	23219.3	25167.1	-9.73	-2.16	540	-2
1929	21.318	23214	25161.5	-9.75	-2.18	540	-2
1930	21.329	23199.4	25145.8	-9.81	-2.24	540	-2
1931	21.3401	23202.3	25149.1	-9.79	-2.23	540	-2
1932	21.3511	23167	25111	-9.93	-2.37	540	-2
1933	21.3622	23175.8	25120.7	-9.9	-2.34	540	-2
1934	21.3732	23172.7	25117.5	-9.91	-2.35	540	-2
1935	21.3842	23181.7	25127.3	-9.88	-2.31	540	-2
1936	21.3953	23182.1	25127.9	-9.87	-2.31	540	-2
1937	21.4063	23139.4	25081.8	-10.04	-2.49	540	-2
1938	21.4174	23145.6	25088.7	-10.02	-2.46	540	-2
1939	21.4284	23150.3	25093.8	-10	-2.44	540	-2
1940	21.4395	23180.9	25127.2	-9.88	-2.31	540	-2
1941	21.4505	23163.1	25108.1	-9.95	-2.39	540	-2
1942	21.4616	23154.3	25098.6	-9.98	-2.42	540	-2
1943	21.4726	23187.4	25134.6	-9.85	-2.28	540	-2
1944	21.4837	23195.4	25143.4	-9.82	-2.25	540	-2
1945	21.4947	23195.1	25143.3	-9.82	-2.25	540	-2
1946	21.5058	23207.5	25156.8	-9.77	-2.2	540	-2
1947	21.5168	23168.9	25115.1	-9.92	-2.36	540	-2
1948	21.5278	23140.1	25084.1	-10.04	-2.48	540	-2
1949	21.5389	23145.3	25089.8	-10.02	-2.46	540	-2
1950	21.5499	23185.2	25133.2	-9.86	-2.29	540	-2
1951	21.561	23146.5	25091.4	-10.01	-2.45	540	-2
1952	21.572	23175.3	25122.8	-9.9	-2.33	540	-2
1953	21.5831	23180.2	25128.2	-9.88	-2.31	540	-2
1954	21.5941	23147.6	25093	-10.01	-2.44	540	-2
1955	21.6052	23178.6	25126.7	-9.89	-2.31	540	-2
1956	21.6162	23175.9	25123.9	-9.9	-2.32	540	-2
1957	21.6273	23181.1	25129.7	-9.88	-2.3	540	-2
1958	21.6383	23187.8	25137.1	-9.85	-2.27	540	-3
1959	21.6493	23147.8	25093.9	-10.01	-2.44	540	-3
1960	21.6604	23151.8	25098.4	-9.99	-2.42	540	-3
1961	21.6714	23156.4	25103.5	-9.97	-2.4	540	-3
1962	21.6825	23166.2	25114.2	-9.93	-2.36	540	-3
1963	21.6935	23147.6	25094.1	-10.01	-2.44	540	-3
1964	21.7046	23173.6	25122.5	-9.91	-2.33	540	-3
1965	21.7156	23119.3	25063.8	-10.12	-2.56	540	-3
1966	21.7267	23131.7	25077.3	-10.07	-2.51	540	-3
1967	21.7377	23137.2	25083.4	-10.05	-2.48	540	-3
1968	21.7488	23143.3	25090.2	-10.02	-2.46	540	-3
1969	21.7598	23110.8	25055	-10.15	-2.59	540	-3
1970	21.7708	23102	25045.7	-10.18	-2.63	540	-3
1971	21.7819	23106.3	25050.4	-10.17	-2.61	540	-3
1972	21.7929	23112.3	25057.1	-10.14	-2.58	540	-3
1973	21.804	23074.8	25016.6	-10.29	-2.74	540	-3
1974	21.815	23129.8	25076.3	-10.08	-2.51	540	-3
1975	21.8261	23083.7	25026.4	-10.26	-2.7	540	-3
1976	21.8371	23136.5	25083.8	-10.05	-2.48	540	-3
1977	21.8482	23165	25114.9	-9.94	-2.36	540	-3
1978	21.8592	23117.3	25063.3	-10.13	-2.56	540	-3
1979	21.8703	23159.8	25109.5	-9.96	-2.38	540	-3
1980	21.8813	23097.3	25041.8	-10.2	-2.64	540	-3
1981	21.8923	23138.1	25086.2	-10.04	-2.47	540	-3
1982	21.9034	23111.9	25057.9	-10.15	-2.58	540	-3
1983	21.9144	23090.2	25034.5	-10.23	-2.67	540	-3
1984	21.9255	23060.9	25002.9	-10.34	-2.79	540	-3
1985	21.9365	23105.4	25051.2	-10.17	-2.61	540	-3
1986	21.9476	23110.3	25056.7	-10.15	-2.59	540	-3
1987	21.9586	23120	25067.4	-10.11	-2.54	540	-3
1988	21.9697	23126.2	25074.3	-10.09	-2.52	540	-3
1989	21.9807	23082.5	25026.9	-10.26	-2.7	540	-3
1990	21.9918	23142.8	25092.5	-10.03	-2.45	540	-3
1991	22.0028	23130.1	25078.9	-10.08	-2.5	540	-3
1992	22.0138	23128.9	25077.7	-10.08	-2.5	540	-3
1993	22.0249	23133.6	25082.9	-10.06	-2.48	540	-3
1994	22.0359	23101.6	25048.3	-10.19	-2.62	540	-3
1995	22.047	23071.3	25015.6	-10.3	-2.75	540	-3
[truncated: 834 more rows]

## Sheet: ED Figure 10E
Title: 31 Date: 2022/08/03 15:36
Protocol: 250 frames + 1 x (20 frames @ 580,0 nm + 250 frames no light). Exposure time: 10 ms Binning: 4x4
Bleaching correction function: exp, offset = 464,80 * exp(-0,0013 * x) + 3495,87 R^2: 0,9383 Video duration: 23,54 s Framerate: 99,83
# Measurement	Time	F	F_bleach_correct	dF/F0	dF/F0_bleach_correct	Wavelength	Info	Grinder status
0	0.01	3784.14	0	?	0	520	Calibration	0
1	0.02	3963.04	0	?	0	520	Calibration	0
2	0.03	4423.99	0	?	0	520	Calibration	0
3	0.0401	4486.91	0	?	0	520	Calibration	0
4	0.0501	4230.82	0	?	0	520	Calibration	0
5	0.0601	3757.49	0	?	0	520	Calibration	0
6	0.0701	3616.38	0	?	0	520	Calibration	0
7	0.0801	3669.86	0	?	0	520	Calibration	0
8	0.0901	3750.63	0	?	0	520	Calibration	0
9	0.1002	3862.99	0	?	0	520	Calibration	0
10	0.1102	3966.18	0	?	0	520	Calibration	0
11	0.1202	3981.46	0	?	0	520	Calibration	0
12	0.1302	3980.54	0	?	0	520	Calibration	0
13	0.1402	3993.26	0	?	0	520	Calibration	0
14	0.1502	3974.6	0	?	0	520	Calibration	0
15	0.1603	3966.66	0	?	0	520	Calibration	0
16	0.1703	3970.42	0	?	0	520	Calibration	0
17	0.1803	3967.47	0	?	0	520	Calibration	0
18	0.1903	3962.17	0	?	0	520	Calibration	0
19	0.2003	3962.19	0	?	0	520	Calibration	0
20	0.2103	3960.28	0	?	0	520	Calibration	0
21	0.2204	3963.53	0	?	0	520	Calibration	0
22	0.2304	3958.89	0	?	0	520	Calibration	0
23	0.2404	3956.9	0	?	0	520	Calibration	0
24	0.2504	3950.65	0	?	0	520	Calibration	0
25	0.2604	3951.45	0	?	0	520	Calibration	0
26	0.2704	3953.65	0	?	0	520	Calibration	0
27	0.2805	3947.52	0	?	0	520	Calibration	0
28	0.2905	3945.71	0	?	0	520	Calibration	0
29	0.3005	3953.65	0	?	0	520	Calibration	0
30	0.3105	3936.02	0	?	0	520	Calibration	0
31	0.3205	3950.66	0	?	0	520	Calibration	0
32	0.3305	3942.31	0	?	0	520	Calibration	0
33	0.3406	3942.37	0	?	0	520	Calibration	0
34	0.3506	3942.58	0	?	0	520	Calibration	0
35	0.3606	3943.23	0	?	0	520	Calibration	0
36	0.3706	3943.79	0	?	0	520	Calibration	0
37	0.3806	3943.98	0	?	0	520	Calibration	0
38	0.3906	3940.14	0	?	0	520	Calibration	0
39	0.4007	3931.59	0	?	0	520	Calibration	0
40	0.4107	3929.23	0	?	0	520	Calibration	0
41	0.4207	3932.23	0	?	0	520	Calibration	0
42	0.4307	3931.68	0	?	0	520	Calibration	0
43	0.4407	3938.85	0	?	0	520	Calibration	0
44	0.4507	3933.47	0	?	0	520	Calibration	0
45	0.4608	3934.83	0	?	0	520	Calibration	0
46	0.4708	3935.31	0	?	0	520	Calibration	0
47	0.4808	3924.17	0	?	0	520	Calibration	0
48	0.4908	3939.48	0	?	0	520	Calibration	0
49	0.5008	3927.39	0	?	0	520	Calibration	0
50	0.5108	3925.21	0	?	0	520	Calibration	0
51	0.5209	3924.12	0	?	0	520	Calibration	0
52	0.5309	3926.89	0	?	0	520	Calibration	0
53	0.5409	3928.08	0	?	0	520	Calibration	0
54	0.5509	3929.83	0	?	0	520	Calibration	0
55	0.5609	3930.68	0	?	0	520	Calibration	0
56	0.5709	3929.52	0	?	0	520	Calibration	0
57	0.581	3921.01	0	?	0	520	Calibration	0
58	0.591	3918.74	0	?	0	520	Calibration	0
59	0.601	3924.19	0	?	0	520	Calibration	0
60	0.611	3921.53	0	?	0	520	Calibration	0
61	0.621	3914.99	0	?	0	520	Calibration	0
62	0.631	3908.89	0	?	0	520	Calibration	0
63	0.6411	3908.19	0	?	0	520	Calibration	0
64	0.6511	3901.8	0	?	0	520	Calibration	0
65	0.6611	3909.42	0	?	0	520	Calibration	0
66	0.6711	3911.19	0	?	0	520	Calibration	0
67	0.6811	3912.43	0	?	0	520	Calibration	0
68	0.6911	3913.37	0	?	0	520	Calibration	0
69	0.7012	3905.29	0	?	0	520	Calibration	0
70	0.7112	3914.21	0	?	0	520	Calibration	0
71	0.7212	3920.89	0	?	0	520	Calibration	0
72	0.7312	3904.5	0	?	0	520	Calibration	0
73	0.7412	3902.84	0	?	0	520	Calibration	0
74	0.7512	3897.86	0	?	0	520	Calibration	0
75	0.7613	3904.46	0	?	0	520	Calibration	0
76	0.7713	3901.75	0	?	0	520	Calibration	0
77	0.7813	3906.64	0	?	0	520	Calibration	0
78	0.7913	3903.25	0	?	0	520	Calibration	0
79	0.8013	3897.29	0	?	0	520	Calibration	0
80	0.8113	3896.22	0	?	0	520	Calibration	0
81	0.8214	3892.98	0	?	0	520	Calibration	0
82	0.8314	3888.88	0	?	0	520	Calibration	0
83	0.8414	3891.56	0	?	0	520	Calibration	0
84	0.8514	3891.83	0	?	0	520	Calibration	0
85	0.8614	3900.79	0	?	0	520	Calibration	0
86	0.8714	3887.81	0	?	0	520	Calibration	0
87	0.8815	3894.13	0	?	0	520	Calibration	0
88	0.8915	3908.46	0	?	0	520	Calibration	0
89	0.9015	3922.41	0	?	0	520	Calibration	0
90	0.9115	3926.52	0	?	0	520	Calibration	0
91	0.9215	3919.21	0	?	0	520	Calibration	0
92	0.9315	3915.23	0	?	0	520	Calibration	0
93	0.9416	3915.45	0	?	0	520	Calibration	0
94	0.9516	3903.89	0	?	0	520	Calibration	0
95	0.9616	3905.9	0	?	0	520	Calibration	0
96	0.9716	3902.12	0	?	0	520	Calibration	0
97	0.9816	3894.32	0	?	0	520	Calibration	0
98	0.9916	3901.89	0	?	0	520	Calibration	0
99	1.0017	3896.16	0	?	0	520	Calibration	0
100	1.0117	3890.33	0	?	0	520	Calibration	0
101	1.0217	3884.9	0	?	0	520	Calibration	0
102	1.0317	3883.11	0	?	0	520	Calibration	0
103	1.0417	3884.54	0	?	0	520	Calibration	0
104	1.0517	3868.87	0	?	0	520	Calibration	0
105	1.0618	3875.2	0	?	0	520	Calibration	0
106	1.0718	3865.73	0	?	0	520	Calibration	0
107	1.0818	3875.48	0	?	0	520	Calibration	0
108	1.0918	3871.33	0	?	0	520	Calibration	0
109	1.1018	3869.66	0	?	0	520	Calibration	0
110	1.1118	3869.58	0	?	0	520	Calibration	0
111	1.1219	3865.95	0	?	0	520	Calibration	0
112	1.1319	3872.45	0	?	0	520	Calibration	0
113	1.1419	3866.63	0	?	0	520	Calibration	0
114	1.1519	3868.02	0	?	0	520	Calibration	0
115	1.1619	3859.45	0	?	0	520	Calibration	0
116	1.1719	3862.09	0	?	0	520	Calibration	0
117	1.182	3865.46	0	?	0	520	Calibration	0
118	1.192	3857.23	0	?	0	520	Calibration	0
119	1.202	3864.12	0	?	0	520	Calibration	0
120	1.212	3857.59	0	?	0	520	Calibration	0
121	1.222	3877.56	0	?	0	520	Calibration	0
122	1.232	3882.2	0	?	0	520	Calibration	0
123	1.2421	3896.38	0	?	0	520	Calibration	0
124	1.2521	3893.83	0	?	0	520	Calibration	0
125	1.2621	3889	0	?	0	520	Calibration	0
126	1.2721	3868.94	0	?	0	520	Calibration	0
127	1.2821	3874.59	0	?	0	520	Calibration	0
128	1.2921	3864.94	0	?	0	520	Calibration	0
129	1.3022	3862.39	0	?	0	520	Calibration	0
130	1.3122	3865.05	0	?	0	520	Calibration	0
131	1.3222	3855.48	0	?	0	520	Calibration	0
132	1.3322	3860.59	0	?	0	520	Calibration	0
133	1.3422	3859.04	0	?	0	520	Calibration	0
134	1.3522	3857.18	0	?	0	520	Calibration	0
135	1.3623	3859.42	0	?	0	520	Calibration	0
136	1.3723	3856.46	0	?	0	520	Calibration	0
137	1.3823	3857.45	0	?	0	520	Calibration	0
138	1.3923	3858.37	0	?	0	520	Calibration	0
139	1.4023	3858.6	0	?	0	520	Calibration	0
140	1.4123	3856.4	0	?	0	520	Calibration	0
141	1.4224	3851.7	0	?	0	520	Calibration	0
142	1.4324	3859.75	0	?	0	520	Calibration	0
143	1.4424	3849.48	0	?	0	520	Calibration	0
144	1.4524	3852.9	0	?	0	520	Calibration	0
145	1.4624	3852.85	0	?	0	520	Calibration	0
146	1.4724	3858.13	0	?	0	520	Calibration	0
147	1.4825	3847.29	0	?	0	520	Calibration	0
148	1.4925	3847.25	0	?	0	520	Calibration	0
149	1.5025	3844.41	0	?	0	520	Calibration	0
150	1.5125	3852.47	0	?	0	520	Calibration	0
151	1.5225	3845.81	0	?	0	520	Calibration	0
152	1.5325	3849.78	0	?	0	520	Calibration	0
153	1.5426	3845.34	0	?	0	520	Calibration	0
154	1.5526	3839.8	0	?	0	520	Calibration	0
155	1.5626	3838.93	0	?	0	520	Calibration	0
156	1.5726	3848.41	0	?	0	520	Calibration	0
157	1.5826	3842.31	0	?	0	520	Calibration	0
158	1.5926	3837.51	0	?	0	520	Calibration	0
159	1.6027	3842.2	0	?	0	520	Calibration	0
160	1.6127	3840.89	0	?	0	520	Calibration	0
161	1.6227	3834.94	0	?	0	520	Calibration	0
162	1.6327	3839.31	0	?	0	520	Calibration	0
163	1.6427	3845.38	0	?	0	520	Calibration	0
164	1.6527	3840.95	0	?	0	520	Calibration	0
165	1.6628	3839.06	0	?	0	520	Calibration	0
166	1.6728	3841.48	0	?	0	520	Calibration	0
167	1.6828	3842.01	0	?	0	520	Calibration	0
168	1.6928	3837.08	0	?	0	520	Calibration	0
169	1.7028	3831.51	0	?	0	520	Calibration	0
170	1.7128	3827.12	0	?	0	520	Calibration	0
171	1.7229	3824.76	0	?	0	520	Calibration	0
172	1.7329	3825.98	0	?	0	520	Calibration	0
173	1.7429	3818.59	0	?	0	520	Calibration	0
174	1.7529	3821.83	0	?	0	520	Calibration	0
175	1.7629	3830.18	0	?	0	520	Calibration	0
176	1.7729	3822.97	0	?	0	520	Calibration	0
177	1.783	3823.61	0	?	0	520	Calibration	0
178	1.793	3828.39	0	?	0	520	Calibration	0
179	1.803	3830.33	0	?	0	520	Calibration	0
180	1.813	3829.47	0	?	0	520	Calibration	0
181	1.823	3832.13	0	?	0	520	Calibration	0
182	1.833	3834.06	0	?	0	520	Calibration	0
183	1.8431	3833.17	0	?	0	520	Calibration	0
184	1.8531	3829.19	0	?	0	520	Calibration	0
185	1.8631	3829.43	0	?	0	520	Calibration	0
186	1.8731	3830.45	0	?	0	520	Calibration	0
187	1.8831	3836.09	0	?	0	520	Calibration	0
188	1.8931	3837.81	0	?	0	520	Calibration	0
189	1.9032	3842.37	0	?	0	520	Calibration	0
190	1.9132	3851.19	0	?	0	520	Calibration	0
191	1.9232	3858.93	0	?	0	520	Calibration	0
192	1.9332	3850.91	0	?	0	520	Calibration	0
193	1.9432	3853.43	0	?	0	520	Calibration	0
194	1.9532	3858.29	0	?	0	520	Calibration	0
195	1.9633	3844.65	0	?	0	520	Calibration	0
196	1.9733	3853.24	0	?	0	520	Calibration	0
197	1.9833	3845.13	0	?	0	520	Calibration	0
198	1.9933	3844.15	0	?	0	520	Calibration	0
199	2.0033	3850.02	0	?	0	520	Calibration	0
200	2.0133	3846.54	0	?	0	520	Calibration	0
201	2.0234	3846.78	0	?	0	520	Calibration	0
202	2.0334	3853.73	0	?	0	520	Calibration	0
203	2.0434	3850.34	0	?	0	520	Calibration	0
204	2.0534	3851.12	0	?	0	520	Calibration	0
205	2.0634	3847.46	0	?	0	520	Calibration	0
206	2.0734	3839.27	0	?	0	520	Calibration	0
207	2.0835	3848.08	0	?	0	520	Calibration	0
208	2.0935	3846.42	0	?	0	520	Calibration	0
209	2.1035	3849.4	0	?	0	520	Calibration	0
210	2.1135	3848.32	0	?	0	520	Calibration	0
211	2.1235	3847.07	0	?	0	520	Calibration	0
212	2.1335	3847.34	0	?	0	520	Calibration	0
213	2.1436	3855.75	0	?	0	520	Calibration	0
214	2.1536	3856.32	0	?	0	520	Calibration	0
215	2.1636	3859.66	0	?	0	520	Calibration	0
216	2.1736	3862.36	0	?	0	520	Calibration	0
217	2.1836	3867.35	0	?	0	520	Calibration	0
218	2.1936	3863.17	0	?	0	520	Calibration	0
219	2.2037	3862.56	0	?	0	520	Calibration	0
220	2.2137	3860.77	0	?	0	520	Calibration	0
221	2.2237	3886.73	0	?	0	520	Calibration	0
222	2.2337	3893.23	0	?	0	520	Calibration	0
223	2.2437	3893.58	0	?	0	520	Calibration	0
224	2.2537	3883.45	0	?	0	520	Calibration	0
225	2.2638	3877.23	0	?	0	520	Calibration	0
226	2.2738	3873.88	0	?	0	520	Calibration	0
227	2.2838	3865.05	0	?	0	520	Calibration	0
228	2.2938	3866.79	0	?	0	520	Calibration	0
229	2.3038	3859.92	0	?	0	520	Calibration	0
230	2.3138	3861.44	0	?	0	520	Calibration	0
231	2.3239	3864.63	0	?	0	520	Calibration	0
232	2.3339	3857.87	0	?	0	520	Calibration	0
233	2.3439	3854.73	0	?	0	520	Calibration	0
234	2.3539	3854.01	0	?	0	520	Calibration	0
235	2.3639	3858.15	0	?	0	520	Calibration	0
236	2.3739	3861.52	0	?	0	520	Calibration	0
237	2.3839	3861.87	0	?	0	520	Calibration	0
238	2.394	3863.28	0	?	0	520	Calibration	0
239	2.404	3874.88	0	?	0	520	Calibration	0
240	2.414	3891.85	0	?	0	520	Calibration	0
241	2.424	3895.56	0	?	0	520	Calibration	0
242	2.434	3881.36	0	?	0	520	Calibration	0
243	2.444	3887.31	0	?	0	520	Calibration	0
244	2.4541	3868.65	0	?	0	520	Calibration	0
245	2.4641	3868.3	0	?	0	520	Calibration	0
246	2.4741	3871.58	0	?	0	520	Calibration	0
247	2.4841	3857.95	0	?	0	520	Calibration	0
248	2.4941	3860.55	0	?	0	520	Calibration	0
249	2.5041	3863.06	0	?	0	520	Calibration	0
250	2.5142	3864.66	0	?	0	520	Calibration	0
251	2.5242	3860.47	0	?	0	520	Calibration	0
252	2.5342	3857.62	0	?	0	520	Calibration	0
253	2.5442	3855.35	0	?	0	520	Calibration	0
254	2.5542	3851.18	0	?	0	520	Calibration	0
255	2.5642	3856.56	0	?	0	520	Calibration	0
256	2.5743	3857.18	0	?	0	520	Calibration	0
257	2.5843	3857.46	0	?	0	520	Calibration	0
258	2.5943	3853.58	0	?	0	520	Calibration	0
259	2.6043	3850.97	0	?	0	520	Calibration	0
260	2.6143	3854.95	0	?	0	520	Calibration	0
261	2.6243	3850.32	0	?	0	520	Calibration	0
262	2.6344	3849.91	0	?	0	520	Calibration	0
263	2.6444	3849.53	0	?	0	520	Calibration	0
264	2.6544	3857.11	0	?	0	520	Calibration	0
265	2.6644	3854.32	0	?	0	520	Calibration	0
266	2.6744	3852.95	0	?	0	520	Calibration	0
267	2.6844	3845.84	0	?	0	520	Calibration	0
268	2.6945	3855.41	0	?	0	520	Calibration	0
269	2.7045	3855.6	0	?	0	520	Calibration	0
270	2.7145	3847.95	0	?	0	520	Calibration	0
271	2.7245	3847.38	0	?	0	520	Calibration	0
272	2.7345	3850.09	0	?	0	520	Calibration	0
273	2.7445	3842.34	0	?	0	520	Calibration	0
274	2.7546	3851.49	0	?	0	520	Calibration	0
275	2.7646	3854.24	0	?	0	520	Calibration	0
276	2.7746	3849.07	0	?	0	520	Calibration	0
277	2.7846	3848.29	0	?	0	520	Calibration	0
278	2.7946	3850.69	0	?	0	520	Calibration	0
279	2.8046	3842.45	0	?	0	520	Calibration	0
280	2.8147	3834.87	0	?	0	520	Calibration	0
281	2.8247	3828.39	0	?	0	520	Calibration	0
282	2.8347	3817.17	0	?	0	520	Calibration	0
283	2.8447	3815.15	0	?	0	520	Calibration	0
284	2.8547	3833.58	0	?	0	520	Calibration	0
285	2.8647	3826.76	0	?	0	520	Calibration	0
286	2.8748	3820.65	0	?	0	520	Calibration	0
287	2.8848	3826.61	0	?	0	520	Calibration	0
288	2.8948	3822.1	0	?	0	520	Calibration	0
289	2.9048	3826.12	0	?	0	520	Calibration	0
290	2.9148	3825.19	0	?	0	520	Calibration	0
291	2.9248	3835.35	0	?	0	520	Calibration	0
292	2.9349	3838.52	0	?	0	520	Calibration	0
293	2.9449	3838.67	0	?	0	520	Calibration	0
294	2.9549	3834.9	0	?	0	520	Calibration	0
295	2.9649	3825.73	0	?	0	520	Calibration	0
296	2.9749	3829.98	0	?	0	520	Calibration	0
297	2.9849	3837.96	0	?	0	520	Calibration	0
298	2.995	3829.84	0	?	0	520	Calibration	0
299	3.005	3829.66	0	?	0	520	Calibration	0
300	3.015	3829.62	0	?	0	520	Calibration	0
301	3.025	3845.12	0	?	0	520	Calibration	0
302	3.035	3839.02	0	?	0	520	Calibration	0
303	3.045	3840.23	0	?	0	520	Calibration	0
304	3.0551	3832.05	0	?	0	520	Calibration	0
305	3.0651	3821.41	0	?	0	520	Calibration	0
306	3.0751	3826.16	0	?	0	520	Calibration	0
307	3.0851	3827.95	0	?	0	520	Calibration	0
308	3.0951	3835.35	0	?	0	520	Calibration	0
309	3.1051	3827.9	0	?	0	520	Calibration	0
310	3.1152	3834.3	0	?	0	520	Calibration	0
311	3.1252	3832.15	0	?	0	520	Calibration	0
312	3.1352	3808.47	0	?	0	520	Calibration	0
313	3.1452	3807.71	0	?	0	520	Calibration	0
314	3.1552	3809.72	0	?	0	520	Calibration	0
315	3.1652	3816.41	0	?	0	520	Calibration	0
316	3.1753	3821.37	0	?	0	520	Calibration	0
317	3.1853	3817.18	0	?	0	520	Calibration	0
318	3.1953	3828.23	0	?	0	520	Calibration	0
319	3.2053	3831.97	0	?	0	520	Calibration	0
320	3.2153	3832.35	0	?	0	520	Calibration	0
321	3.2253	3837.07	0	?	0	520	Calibration	0
322	3.2354	3837.41	0	?	0	520	Calibration	0
323	3.2454	3833.56	0	?	0	520	Calibration	0
324	3.2554	3826.28	0	?	0	520	Calibration	0
325	3.2654	3823.97	0	?	0	520	Calibration	0
326	3.2754	3815.66	0	?	0	520	Calibration	0
327	3.2854	3821.56	0	?	0	520	Calibration	0
328	3.2955	3822.41	0	?	0	520	Calibration	0
329	3.3055	3817.81	0	?	0	520	Calibration	0
330	3.3155	3819.61	0	?	0	520	Calibration	0
331	3.3255	3813.26	0	?	0	520	Calibration	0
332	3.3355	3813.62	0	?	0	520	Calibration	0
333	3.3455	3817.17	0	?	0	520	Calibration	0
334	3.3556	3814.06	0	?	0	520	Calibration	0
335	3.3656	3816.53	0	?	0	520	Calibration	0
336	3.3756	3820.32	0	?	0	520	Calibration	0
337	3.3856	3812.22	0	?	0	520	Calibration	0
338	3.3956	3812.64	0	?	0	520	Calibration	0
339	3.4056	3808.92	0	?	0	520	Calibration	0
340	3.4157	3797.88	0	?	0	520	Calibration	0
341	3.4257	3807.73	0	?	0	520	Calibration	0
342	3.4357	3794.29	0	?	0	520	Calibration	0
343	3.4457	3796.02	0	?	0	520	Calibration	0
344	3.4557	3791.42	0	?	0	520	Calibration	0
345	3.4657	3801.42	0	?	0	520	Calibration	0
346	3.4758	3803.16	0	?	0	520	Calibration	0
347	3.4858	3796.36	0	?	0	520	Calibration	0
348	3.4958	3800.28	0	?	0	520	Calibration	0
349	3.5058	3805.96	0	?	0	520	Calibration	0
[truncated: 2,000 more rows]

## Sheet: ED Figure 10F
Time	dF/F0_bleach_correct	Wavelength	dF/F0_bleach_correct	Wavelength	dF/F0_bleach_correct	Wavelength	dF/F0_bleach_correct	Wavelength	dF/F0_bleach_correct	Wavelength	dF/F0_bleach_correct	Wavelength	dF/F0_bleach_correct	Wavelength	dF/F0_bleach_correct	Wavelength	dF/F0_bleach_correct	Wavelength	dF/F0_bleach_correct	Wavelength	dF/F0_bleach_correct	Wavelength	dF/F0_bleach_correct	Wavelength	dF/F0_bleach_correct	Wavelength	dF/F0_bleach_correct	Wavelength	DF/F0 Mean	SEM
[truncated: 2,350 more rows]

[truncated: 1 more sheets: ED Figure 10G]
